# Supplementary material for: Proteomic Profiling of Major Peanut Allergens and Their Post-Translational Modifications Affected by Roasting
Source: MDPI journal article supplement (doi:10.3390/foods11243993), 2022-12-09
Supplement: s1 [file s1]

**Summary**

ALL RAW ALLERGEN 1D SDS-PAGE BANDS PROCESSED TOGETHER AS ONE CRUNCH/SAMPLE (PAGES 1-143)

ALL ROASTED ALLERGEN 1D SDS-PAGE BANDS PROCESSED TOGETHER AS ONE CRUNCH/SAMPLE (PAGES 144-325)

## 1. Notes

PEAKS PTM35  
RAW peanut extract files.  
All raw allergen bands from 1D SDS PAGE

## 2. Result Statistics

**Figure 1.** False discovery rate (FDR) curve. X axis is the number of peptides being kept. Y axis is the corresponding FDR. [?](#)

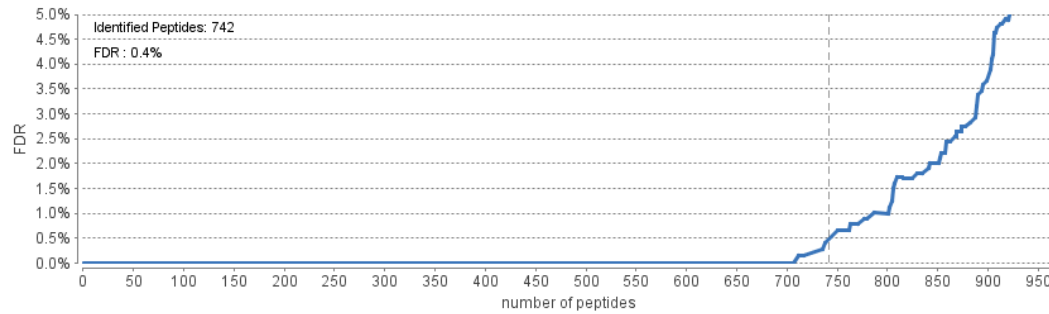

**Figure 2.** PSM score distribution. (a) Distribution of PEAKS peptide score; (b) Scatterplot of PEAKS peptide score versus precursor mass error. [?](#)

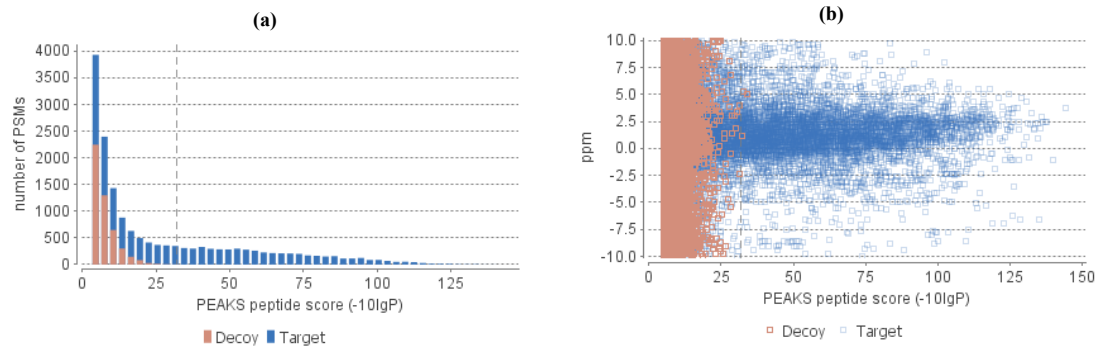

**Table 1.** Statistics of data.

|            | #Scans |       |          | #Features | Identified |        |             | #Peptides | #Sequences | #Proteins* |     |     |
|------------|--------|-------|----------|-----------|------------|--------|-------------|-----------|------------|------------|-----|-----|
|            | MS1    | MS/MS | #Chimera |           | #PSMs      | #Scans | #Features** |           |            | Groups     | All | Top |
| Total      | 30104  | 25497 | 3827     | 51759     | 5546       | 5363   | 2290        | 742       | 467        | 59         | 94  | 73  |
| Raw in gel | 30104  | 25497 | 3827     | 51759     | 5546       | 5363   | 2290        | 742       | 467        | 59         | 94  | 73  |

\* proteins with significant peptides are used in counts.

\*\* features are identified by DB search only.

**Figure 3.** Sample overlap for Proteins and Peptides (up to 8 samples). (a) All Proteins; (b) Top Proteins; (c) Peptides; ?

(a) Not applicable to only one sample (b) Not applicable to only one sample (c) Not applicable to only one sample

**Figure 4.** Distribution of peptide feature detection. (a) Feature m/z distribution; (b) Feature RT distribution.

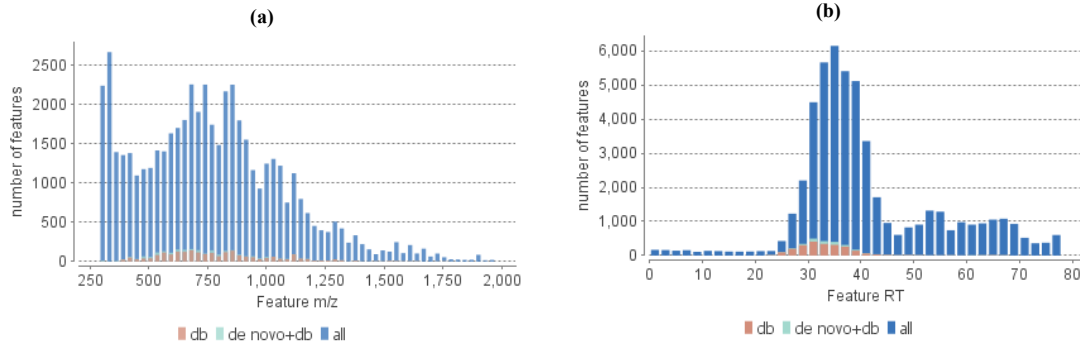

**Figure 5.** Distribution of identified peptide features. (a) Feature abundance distribution; (b) *De novo* sequencing validation. ?

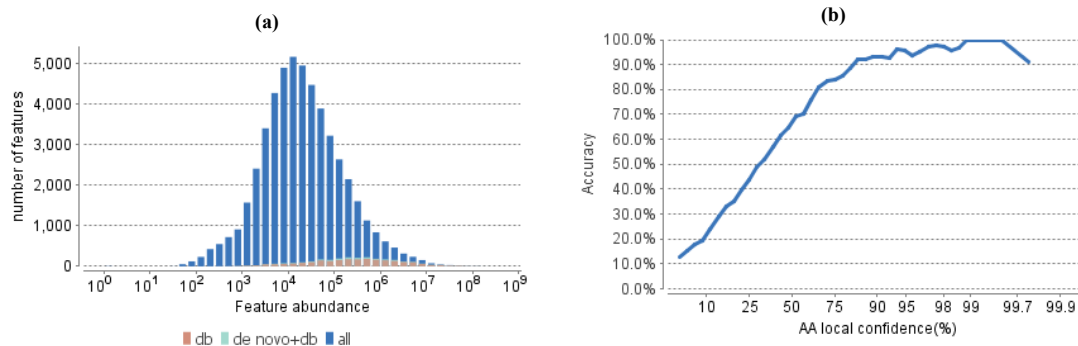

**Table 2.** Result filtration parameters.

|                          |       |
|--------------------------|-------|
| Peptide -10lgP           | ≥31.8 |
| PTM AScore               | ≥50   |
| Protein -10lgP           | ≥20   |
| Proteins unique peptides | ≥1    |
| De novo score(%)         | ≥50%  |

**Table 3.** Statistics of filtered result.

|                                |      |
|--------------------------------|------|
| FDR (Peptide-Spectrum Matches) | 0.1% |
| FDR (Peptide Sequences)        | 0.4% |
| FDR (Protein Group)            | 1.7% |
| De Novo Only Spectra           | 516  |

**Table 4.** PTM profile.

| Name              | ΔMass  | Position       | #PSM | -10lgP | Abundance | AScore  |
|-------------------|--------|----------------|------|--------|-----------|---------|
| Carbamidomethyl   | 57.02  | C              | 575  | 137.14 | 1.51E6    | 1000.00 |
| Deamidation       | .98    | NQ             | 290  | 140.09 | 1.13E8    | 15.73   |
| Oxidation         | 15.99  | M              | 288  | 134.77 | 6.58E5    | 1000.00 |
| Carbamidomethyl   | 57.02  | DEHK,N-term    | 147  | 104.65 | 7.25E6    | 1000.00 |
| Acetylation       | 42.01  | Protein N-term | 31   | 96.71  | 6.15E4    | 1000.00 |
| Dimethylation(KR) | 28.03  | KR             | 24   | 112.27 | 3.83E7    | 1000.00 |
| Dethiomethyl      | -48.00 | M              | 24   | 93.52  | 3.52E6    | 26.02   |
| SMA               | 127.06 | N-term         | 21   | 53.35  | 3.56E6    | 1000.00 |

|                     |        |             |    |        |        |         |
|---------------------|--------|-------------|----|--------|--------|---------|
| Dehydration         | -18.01 | DSTY,C-term | 19 | 68.32  | 5.05E6 | 1000.00 |
| Propionamide        | 71.04  | C           | 14 | 68.93  | 7.6E4  | 0.00    |
| Methylation(others) | 14.02  | DHST        | 13 | 55.85  | 1.42E5 | 18.00   |
| Pyro-glu from Q     | -17.03 | N-term      | 12 | 76.65  | 1.56E6 | 1000.00 |
| Methylation(KR)     | 14.02  | KR          | 12 | 101.30 | 3.17E5 | 1000.00 |
| Ammonia loss        | -17.03 | N           | 9  | 86.12  | 3.12E6 | 11.10   |
| Ethyl               | 28.03  | D,N-term    | 7  | 66.04  | 2.35E6 | 7.21    |
| Oxidation           | 15.99  | NPR         | 6  | 66.56  | 2.66E6 | 32.54   |
| Cation:Fe[II]       | 53.92  | DE          | 5  | 49.75  | 6.96E4 | 87.12   |
| Sodium              | 21.98  | E           | 5  | 52.44  |        | 12.81   |
| Pyro-glu from E     | -18.01 | N-term      | 4  | 71.00  | 5.39E4 | 1000.00 |

3. Experiment Control

Figure 6. Precursor mass error of peptide-spectrum matches (PSM) in filtered result. (a) Distribution of precursor mass error in ppm; (b) Scatterplot of precursor m/z versus precursor mass error in ppm.

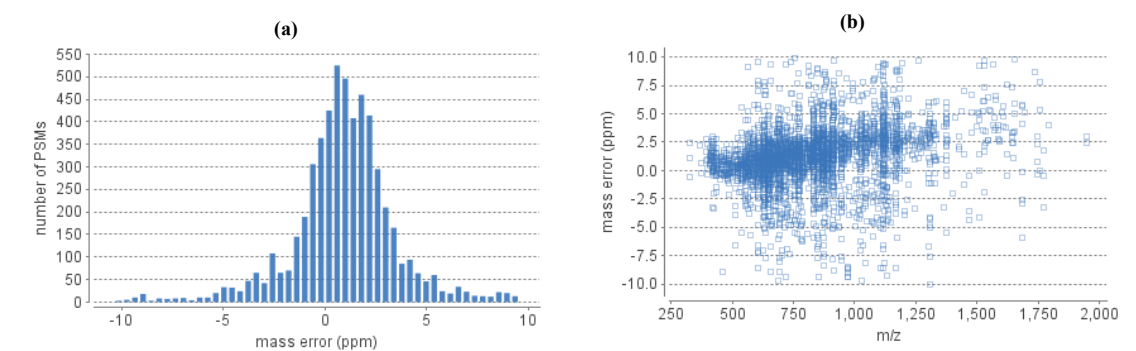

Table 5. Number of identified peptides in each sample by the number of missed cleavages.

|                  |     |     |    |   |    |
|------------------|-----|-----|----|---|----|
| Missed Cleavages | 0   | 1   | 2  | 3 | 4+ |
| Raw in gel       | 392 | 277 | 73 | 0 | 0  |

4. Other Information

Table 6. Search parameters.

PEAKS Version: PEAKS Studio 10.6 build 20201015  
Search Engine Name: PEAKS  
Parent Mass Error Tolerance: 10.0 ppm  
Fragment Mass Error Tolerance: 0.5 Da  
Precursor Mass Search Type: monoisotopic  
Enzyme: Specified by each sample  
Max Missed Cleavages: 2

Table 7. Instrument parameters.

Fractions: OB5921 H2 raw.raw, OB5925 H3B raw.raw, OB5930 H6 raw.raw, OB5931 H6 raw.raw, OB5932 H2 raw.raw, OB5933 H2 raw.raw, OB5934 H3B raw.raw, OB5935 H3B raw.raw, OB5936 H3A raw.raw, OB5937 H3A raw.raw, OB5938 H3A raw.raw, OB5939 H1 raw.raw, OB5940 H1 raw.raw, OB5941 H1 raw.raw  
Ion Source: ESI(nano-spray)  
Fragmentation Mode: CID, CAD(y and b ions)

Digest Mode: Unspecific  
Fixed Modifications:  
  Carbamidomethylation: 57.02  
Variable Modifications:  
  Oxidation (M): 15.99  
  Deamidation (NQ): 0.98  
  Acetylation (K): 42.01  
  Acetylation (Protein N-term): 42.01  
  Acetylation (N-term): 42.01  
  Amidation: -0.98  
  Beta-methylthiolation: 45.99  
  Biotinylation: 226.08  
  and 303 more...  
Max Variable PTM Per Peptide: 3  
Database: Uniprot\_Peanut-3818\_Jul18  
Taxon: All  
Contaminant Database: contam MQ  
Searched Entry: 1723  
FDR Estimation: Enabled  
De novo score(%) threshold: 15  
Peptide hit threshold (-10logP): 30.0  
Peaks run ID: 16  
Merge Options: no merge  
Precursor Options: corrected  
Charge Options: no correction  
Filter m/z: 200.0 - 2000.0  
Filter Charge: 2 - 8  
Process: true  
Associate chimera: yes

MS Scan Mode: FT-ICR/Orbitrap  
MS/MS Scan Mode: FT-ICR/Orbitrap

Protein List

Protein Accession Contains:  
Protein Description Contains:  
Protein Sample Area >=  
Protein PTM Contains:

| Protein Group | Protein ID | Accession             | -10lgP | Coverage (%) | Coverage (%) Raw in gel | Area Raw in gel | #Peptides | #Unique | #Spec Raw in gel | PTM | Avg. Mass | Description                                                                              |
|---------------|------------|-----------------------|--------|--------------|-------------------------|-----------------|-----------|---------|------------------|-----|-----------|------------------------------------------------------------------------------------------|
| 2             | 7          | sp P43237 ALL11_ARAHY | 588.42 | 63           | 63                      | 3.5835E8        | 96        | 11      | 3030             | Y   | 70283     | Allergen Ara h 1, clone P17 OS=Arachis hypogaea OX=3818 PE=1 SV=1                        |
| 2             | 6          | B3IXL2 B3IXL2_ARAHY   | 588.42 | 63           | 63                      | 3.5835E8        | 96        | 11      | 3030             | Y   | 70283     | Main allergen Ara h1 OS=Arachis hypogaea OX=3818 PE=2 SV=1                               |
| 2             | 5          | Q6PSU3 Q6PSU3_ARAHY   | 588.42 | 67           | 67                      | 3.5835E8        | 96        | 11      | 3030             | Y   | 66575     | Conarachin (Fragment) OS=Arachis hypogaea OX=3818 PE=4 SV=1                              |
| 1             | 3          | N1NG13 N1NG13_ARAHY   | 582.61 | 61           | 61                      | 7.4472E7        | 87        | 6       | 3116             | Y   | 71345     | Seed storage protein Ara h1 OS=Arachis hypogaea OX=3818 GN=ARAX_AHF417E0 7-017 PE=4 SV=1 |
| 1             | 2          | sp P43238 ALL12_ARAHY | 582.61 | 61           | 61                      | 7.4472E7        | 87        | 6       | 3116             | Y   | 71345     | Allergen Ara h 1, clone P41B OS=Arachis hypogaea OX=3818 PE=1 SV=1                       |
| 3             | 8          | Q6PSU6 Q6PSU6_ARAHY   | 513.69 | 70           | 70                      | 5.0531E6        | 54        | 1       | 1284             | Y   | 34133     | Conarachin (Fragment) OS=Arachis hypogaea OX=3818 PE=2 SV=1                              |
| 5             | 11         | A1DZF0 A1DZF0_ARAHY   | 428.28 | 52           | 52                      | 3.8796E6        | 26        | 3       | 312              | Y   | 60375     | Arachin 6 OS=Arachis hypogaea OX=3818 PE=2 SV=1                                          |
| 7             | 10         | B5TYU1 B5TYU1_ARAHY   | 426.96 | 55           | 55                      | 5.6625E7        | 28        | 1       | 268              | Y   | 60624     | Arachin Arah3 isoform OS=Arachis hypogaea OX=3818 PE=1 SV=1                              |
| 6             | 14         | Q647H4 Q647H4_ARAHY   | 420.67 | 52           | 52                      | 6.4203E6        | 24        | 4       | 297              | Y   | 61506     | Arachin Ahy-1 OS=Arachis hypogaea OX=3818 PE=2 SV=1                                      |
| 12            | 25         | E9LFE8 E9LFE8_ARAHY   | 412.93 | 82           | 82                      | 1.3592E8        | 20        | 17      | 224              | Y   | 28290     | 11S arachin (Fragment) OS=Arachis hypogaea OX=3818 PE=2 SV=1                             |
| 10            | 13         | Q9FZ11 Q9FZ11_ARAHY   | 405.27 | 53           | 53                      | 2.2743E6        | 27        | 3       | 232              | Y   | 60449     | Gly1 OS=Arachis hypogaea OX=3818 GN=Gly1 PE=2 SV=1                                       |
| 9             | 9          | Q647H3 Q647H3_ARAHY   | 401.77 | 61           | 61                      | 8.8783E7        | 25        | 2       | 258              | Y   | 61532     | Arachin Ahy-2 OS=Arachis hypogaea OX=3818 PE=2 SV=1                                      |
| 17            | 15         | T2B9M0 T2B9M0_ARAHY   | 399.21 | 74           | 74                      | 5.3946E7        | 29        | 29      | 132              | Y   | 38383     | Fructose-bisphosphate aldolase OS=Arachis hypogaea OX=3818 PE=2 SV=1                     |
| 11            | 18         | Q516T2 Q516T2_ARAHY   | 394.77 | 47           | 47                      | 0               | 25        | 1       | 223              | Y   | 60736     | Arachin Ahy-4 OS=Arachis hypogaea OX=3818 PE=2 SV=1                                      |
| 15            | 30         | A1E2B0 A1E2B0_ARAHY   | 393.59 | 69           | 69                      | 8.5236E7        | 19        | 16      | 157              | Y   | 33520     | 11S seed storage globulin B1 OS=Arachis hypogaea OX=3818 PE=2 SV=1                       |
| 16            | 26         | Q38711 Q38711_ARAHY   | 383.89 | 80           | 80                      | 6.0276E6        | 17        | 2       | 144              | Y   | 29134     | Galactose-binding lectin (Fragment) OS=Arachis hypogaea OX=3818 GN=lec PE=2 SV=1         |
| 13            | 19         | Q6IWG5 Q6IWG5_ARAHY   | 377.88 | 61           | 61                      | 2.596E8         | 23        | 21      | 157              | Y   | 58061     | Glycinin (Fragment) OS=Arachis hypogaea OX=3818 PE=2 SV=1                                |
| 13            | 20         | Q0GM57 Q0GM57_ARAHY   | 377.88 | 61           | 61                      | 2.596E8         | 23        | 21      | 157              | Y   | 58263     | Iso-Ara h3 OS=Arachis hypogaea OX=3818 PE=2 SV=1                                         |

total 73 proteins

| Protein Group     | Protein ID | Accession                                   | -10lgP | Coverage (%) | Coverage (%) Raw in gel | Area Raw in gel | #Peptides | #Unique | #Spec Raw in gel | PTM | Avg. Mass | Description                                                                                           |
|-------------------|------------|---------------------------------------------|--------|--------------|-------------------------|-----------------|-----------|---------|------------------|-----|-----------|-------------------------------------------------------------------------------------------------------|
| 18                | 27         | <a href="#">A0A089ZXL7 A0A089ZXL7_ARAHY</a> | 371.36 | 83           | 83                      | 4.7484E5        | 18        | 3       | 119              | Y   | 29407     | Peanut agglutinin variant OS=Arachis hypogaea OX=3818 PE=2 SV=1                                       |
| 24                | 28         | <a href="#">sp Q647H2 AHY3_ARAHY</a>        | 331.14 | 30           | 30                      | 1.8822E7        | 12        | 10      | 53               | Y   | 54569     | Arachin Ahy-3 OS=Arachis hypogaea OX=3818 PE=1 SV=1                                                   |
| 21                | 21         | <a href="#">A0A0F6VX63 A0A0F6VX63_ARAHY</a> | 328.06 | 60           | 60                      | 4.6212E7        | 20        | 20      | 67               | Y   | 36080     | Annexin OS=Arachis hypogaea OX=3818 PE=2 SV=1                                                         |
| 20                | 32         | <a href="#">A0A0A6ZDP1 A0A0A6ZDP1_ARAHY</a> | 323.84 | 70           | 70                      | 8.8001E7        | 14        | 5       | 94               | Y   | 20101     | Glyceraldehyde-3-phosphate dehydrogenase C2 OS=Arachis hypogaea OX=3818 PE=2 SV=1                     |
| 19                | 29         | <a href="#">Q82580 Q82580_ARAHY</a>         | 319.77 | 30           | 30                      | 1.4756E6        | 16        | 1       | 99               | Y   | 58350     | Glycinin (Fragment) OS=Arachis hypogaea OX=3818 GN=Arah3 PE=2 SV=1                                    |
| 8                 | 36         | <a href="#">A5Z1R0 A5Z1R0_ARAHY</a>         | 307.18 | 67           | 67                      | 2.2488E7        | 11        | 11      | 263              | Y   | 16920     | Ara h 6 allergen OS=Arachis hypogaea OX=3818 GN=Ara h 6 PE=4 SV=1                                     |
| 8                 | 35         | <a href="#">sp Q647G9 CONG_ARAHY</a>        | 307.18 | 67           | 67                      | 2.2488E7        | 11        | 11      | 263              | Y   | 16920     | Conglutin OS=Arachis hypogaea OX=3818 PE=1 SV=1                                                       |
| 25                | 33         | <a href="#">A1E2B1 A1E2B1_ARAHY</a>         | 293.36 | 52           | 52                      | 2.0862E7        | 12        | 12      | 52               | Y   | 31268     | 11S seed storage globulin B2 OS=Arachis hypogaea OX=3818 PE=2 SV=1                                    |
| 26                | 34         | <a href="#">A0A0A6ZDT0 A0A0A6ZDT0_ARAHY</a> | 277.30 | 45           | 45                      | 1.1133E6        | 11        | 2       | 41               | Y   | 20099     | Glyceraldehyde-3-phosphate dehydrogenase C2 OS=Arachis hypogaea OX=3818 PE=4 SV=1                     |
| 23                | 47         | <a href="#">E9LFE9 E9LFE9_ARAHY</a>         | 253.30 | 38           | 38                      | 2.708E7         | 8         | 8       | 50               | Y   | 28300     | 11S arachin OS=Arachis hypogaea OX=3818 PE=2 SV=1                                                     |
| 31                | 40         | <a href="#">Q647H1 Q647H1_ARAHY</a>         | 233.97 | 10           | 10                      | 4.7101E6        | 5         | 5       | 14               | Y   | 75933     | Conarachin OS=Arachis hypogaea OX=3818 PE=2 SV=1                                                      |
| 32                | 37         | <a href="#">A0A0F7GF62 A0A0F7GF62_ARAHY</a> | 224.59 | 28           | 28                      | 1.588E6         | 6         | 6       | 14               | Y   | 36134     | Annexin OS=Arachis hypogaea OX=3818 GN=AnnAh6 PE=2 SV=1                                               |
| 29                | 50         | <a href="#">B0YIU5 B0YIU5_ARAHY</a>         | 203.22 | 59           | 59                      | 2.7132E5        | 5         | 5       | 21               | Y   | 16413     | Ara h 8 allergen isoform OS=Arachis hypogaea OX=3818 PE=2 SV=1                                        |
| 36                | 48         | <a href="#">Q2PK12 Q2PK12_ARAHY</a>         | 196.35 | 60           | 60                      | 9.443E4         | 5         | 5       | 11               | Y   | 16090     | Actin depolymerizing factor-like protein OS=Arachis hypogaea OX=3818 PE=2 SV=1                        |
| 33                | 63         | <a href="#">H6U596 H6U596_ARAHY</a>         | 192.07 | 30           | 30                      | 1.9528E7        | 5         | 5       | 14               | N   | 19370     | Alcohol dehydrogenase (Fragment) OS=Arachis hypogaea OX=3818 PE=2 SV=1                                |
| 28                | 52         | <a href="#">B4UW81 B4UW81_ARAHY</a>         | 192.06 | 46           | 46                      | 1.0118E7        | 5         | 5       | 22               | Y   | 20343     | Glutathione S-transferase 2 OS=Arachis hypogaea OX=3818 PE=2 SV=1                                     |
| 35                | 38         | <a href="#">D8KXZ8 D8KXZ8_ARAHY</a>         | 187.85 | 23           | 23                      | 1.6879E4        | 6         | 2       | 10               | N   | 41475     | Enoyl-ACP reductase 1-3 OS=Arachis hypogaea OX=3818 GN=ENR1-3 PE=2 SV=1                               |
| 27                | 44         | <a href="#">sp Q6PSU2 CONG7_ARAHY</a>       | 184.43 | 46           | 46                      | 9.5425E6        | 7         | 7       | 39               | Y   | 20114     | Conglutin-7 OS=Arachis hypogaea OX=3818 PE=1 SV=2                                                     |
| 39                | 39         | <a href="#">E6Y9A9 E6Y9A9_ARAHY</a>         | 175.27 | 23           | 23                      | 1.1751E4        | 5         | 1       | 8                | N   | 41491     | Enoyl-ACP reductase OS=Arachis hypogaea OX=3818 GN=ER PE=2 SV=1                                       |
| 38                | 41         | <a href="#">Q2Q356 Q2Q356_ARAHY</a>         | 173.94 | 17           | 17                      | 1.3383E6        | 6         | 6       | 11               | Y   | 51526     | Ribulose biphosphate carboxylase large chain (Fragment) OS=Arachis hypogaea OX=3818 GN=rbcl PE=3 SV=1 |
| 38                | 42         | <a href="#">A0A075M981 A0A075M981_ARAHY</a> | 173.94 | 16           | 16                      | 1.3383E6        | 6         | 6       | 11               | Y   | 51912     | Ribulose biphosphate carboxylase large chain (Fragment) OS=Arachis hypogaea OX=3818 GN=rbcl PE=3 SV=1 |
| 38                | 43         | <a href="#">A0A191UJ50 A0A191UJ50_ARAHY</a> | 173.94 | 16           | 16                      | 1.3383E6        | 6         | 6       | 11               | Y   | 52587     | Ribulose biphosphate carboxylase large chain OS=Arachis hypogaea OX=3818 GN=rbcl PE=3 SV=1            |
| 30                | 54         | <a href="#">N1NKG9 N1NKG9_ARAHY</a>         | 173.74 | 36           | 36                      | 2.7405E6        | 4         | 4       | 16               | N   | 26041     | Seed maturation protein OS=Arachis hypogaea OX=3818 GN=ARAX_AHF417E07-003 PE=4 SV=1                   |
| 41                | 61         | <a href="#">Q42515 Q42515_ARAHY</a>         | 165.97 | 21           | 21                      | 9.0898E5        | 3         | 3       | 8                | Y   | 28924     | Chitinase (Class II) OS=Arachis hypogaea OX=3818 GN=chi2;2 PE=2 SV=1                                  |
| 37                | 58         | <a href="#">B4UW89 B4UW89_ARAHY</a>         | 155.96 | 22           | 22                      | 3.7088E4        | 4         | 4       | 10               | Y   | 18100     | Heat shock protein 2 OS=Arachis hypogaea OX=3818 PE=2 SV=1                                            |
| 42                | 53         | <a href="#">A0A0R4UXQ1 A0A0R4UXQ1_ARAHY</a> | 155.35 | 16           | 16                      | 9.4117E5        | 3         | 3       | 6                | Y   | 48348     | 3-ketoacyl-CoA thiolase OS=Arachis hypogaea OX=3818 GN=PKT PE=2 SV=1                                  |
| 47                | 161        | <a href="#">D4NXQ0 D4NXQ0_ARAHY</a>         | 128.12 | 10           | 10                      | 4.1064E5        | 1         | 1       | 5                | Y   | 23448     | Germin-like protein subfamily 3 member 3 OS=Arachis hypogaea OX=3818 GN=GLP1 PE=2 SV=1                |
| 47                | 173        | <a href="#">A7LIS5 A7LIS5_ARAHY</a>         | 128.12 | 10           | 10                      | 4.1064E5        | 1         | 1       | 5                | Y   | 23461     | Oxalate oxidase OS=Arachis hypogaea OX=3818 GN=OxOxs PE=2 SV=1                                        |
| 49                | 90         | <a href="#">B4UWD5 B4UWD5_ARAHY</a>         | 120.07 | 26           | 26                      | 1.1738E6        | 2         | 2       | 4                | N   | 15013     | Proteasome subunit alpha type (Fragment) OS=Arachis hypogaea OX=3818 PE=2 SV=1                        |
| 46                | 96         | <a href="#">Q45W80 Q45W80_ARAHY</a>         | 106.45 | 29           | 29                      | 4.3272E4        | 3         | 3       | 4                | Y   | 16439     | Nucleoside diphosphate kinase OS=Arachis hypogaea OX=3818 PE=2 SV=1                                   |
| 54                | 74         | <a href="#">E5FHZ2 E5FHZ2_ARAHY</a>         | 106.30 | 14           | 14                      | 6.4018E4        | 2         | 2       | 2                | N   | 27370     | Late embryogenesis abundant protein group 5 protein OS=Arachis hypogaea OX=3818 GN=LEA5-2 PE=2 SV=1   |
| 63                | 109        | <a href="#">A0A290FZ3 A0A290FZ3_ARAHY</a>   | 99.74  | 5            | 5                       | 1.8555E5        | 1         | 1       | 1                | N   | 41532     | Resistance protein (Fragment) OS=Arachis hypogaea OX=3818 PE=2 SV=1                                   |
| 51                | 122        | <a href="#">N1NJN8 N1NJN8_ARAHY</a>         | 96.65  | 9            | 9                       | 3.0867E5        | 2         | 2       | 3                | N   | 23506     | Proteasome subunit OS=Arachis hypogaea OX=3818 GN=ARAX_AHF417E07-015 PE=4 SV=1                        |
| 45                | 126        | <a href="#">Q1PCR5 Q1PCR5_ARAHY</a>         | 95.82  | 4            | 4                       | 8.8119E5        | 1         | 1       | 5                | N   | 24047     | 20S proteasome beta subunit (Fragment) OS=Arachis hypogaea OX=3818 PE=2 SV=1                          |
| 44                | 121        | <a href="#">Q06H31 Q06H31_ARAHY</a>         | 94.32  | 26           | 26                      | 6.6347E5        | 2         | 2       | 5                | Y   | 19128     | Translationally controlled tumor-like protein OS=Arachis hypogaea OX=3818 PE=2 SV=1                   |
| 62                | 231        | <a href="#">Q06H23 Q06H23_ARAHY</a>         | 88.89  | 18           | 18                      | 9.6761E4        | 1         | 1       | 2                | Y   | 16492     | Ubiquitin carrier-like protein OS=Arachis hypogaea OX=3818 PE=2 SV=1                                  |
| 50                | 117        | <a href="#">Q1HDS7 Q1HDS7_ARAHY</a>         | 84.00  | 32           | 32                      | 1.9718E5        | 2         | 2       | 3                | N   | 15198     | Superoxide dismutase [Cu-Zn] OS=Arachis hypogaea OX=3818 PE=2 SV=1                                    |
| 50                | 116        | <a href="#">Q45W82 Q45W82_ARAHY</a>         | 84.00  | 32           | 32                      | 1.9718E5        | 2         | 2       | 3                | N   | 15098     | Cu-Zn superoxide dismutase OS=Arachis hypogaea OX=3818 PE=2 SV=1                                      |
| 52                | 83         | <a href="#">K7PQ65 K7PQ65_ARAHY</a>         | 81.10  | 13           | 13                      | 1.435E4         | 2         | 2       | 3                | N   | 19193     | Mother of FT and TFL1 OS=Arachis hypogaea OX=3818 GN=MFT PE=2 SV=1                                    |
| 69                | 232        | <a href="#">B4UWB3 B4UWB3_ARAHY</a>         | 80.51  | 8            | 8                       | 0               | 1         | 1       | 1                | N   | 16789     | Putative L24 ribosomal protein OS=Arachis hypogaea OX=3818 PE=2 SV=1                                  |
| 48                | 98         | <a href="#">Q647G5 Q647G5_ARAHY</a>         | 79.23  | 7            | 7                       | 4.7315E4        | 1         | 1       | 4                | N   | 17753     | Oleosin 17.8 OS=Arachis hypogaea OX=3818 PE=2 SV=2                                                    |
| 48                | 105        | <a href="#">Q647G4 Q647G4_ARAHY</a>         | 79.23  | 7            | 7                       | 4.7315E4        | 1         | 1       | 4                | N   | 15527     | Oleosin 2 (Fragment) OS=Arachis hypogaea OX=3818 PE=2 SV=1                                            |
| 61                | 215        | <a href="#">B4UWC9 B4UWC9_ARAHY</a>         | 67.57  | 16           | 16                      | 1.231E5         | 1         | 1       | 2                | N   | 14223     | MCT-1 protein-like protein (Fragment) OS=Arachis hypogaea OX=3818 PE=2 SV=1                           |
| 53                | 133        | <a href="#">B4UWB2 B4UWB2_ARAHY</a>         | 65.65  | 4            | 4                       | 2.8581E5        | 1         | 1       | 2                | N   | 21637     | Kunitz trypsin inhibitor 4 OS=Arachis hypogaea OX=3818 PE=2 SV=1                                      |
| 70                | 71         | <a href="#">A0A290GK88 A0A290GK88_ARAHY</a> | 65.30  | 12           | 12                      | 2.2447E5        | 1         | 1       | 1                | N   | 24410     | Resistance protein (Fragment) OS=Arachis hypogaea OX=3818 PE=2 SV=1                                   |
| 55                | 235        | <a href="#">A0A0A1EXN0 A0A0A1EXN0_ARAHY</a> | 65.01  | 9            | 9                       | 7.7614E5        | 1         | 1       | 3                | N   | 35871     | Actin (Fragment) OS=Arachis hypogaea OX=3818 PE=3 SV=1                                                |
| total 73 proteins |            |                                             |        |              |                         |                 |           |         |                  |     |           |                                                                                                       |

| Protein Group     | Protein ID | Accession                   | -10lgP | Coverage (%) | Coverage (%) Raw in gel | Area Raw in gel | #Peptides | #Unique | #Spec Raw in gel | PTM | Avg. Mass | Description                                                                            |
|-------------------|------------|-----------------------------|--------|--------------|-------------------------|-----------------|-----------|---------|------------------|-----|-----------|----------------------------------------------------------------------------------------|
| 55                | 234        | A0A0A1EUV7 A0A0A1EUV7_ARAHY | 65.01  | 9            | 9                       | 7.7614E5        | 1         | 1       | 3                | N   | 35884     | Actin (Fragment) OS=Arachis hypogaea OX=3818 PE=3 SV=1                                 |
| 55                | 233        | A0A0A1ESG0 A0A0A1ESG0_ARAHY | 65.01  | 9            | 9                       | 7.7614E5        | 1         | 1       | 3                | N   | 35855     | Actin (Fragment) OS=Arachis hypogaea OX=3818 PE=3 SV=1                                 |
| 74                | 111        | Q45W77 Q45W77_ARAHY         | 60.66  | 12           | 12                      | 5.3162E3        | 1         | 1       | 1                | N   | 17206     | Ubiquitin-conjugating enzyme 1 OS=Arachis hypogaea OX=3818 PE=2 SV=1                   |
| 40                | 152        | F8UX79 F8UX79_ARAHY         | 57.87  | 2            | 2                       | 1.0557E6        | 1         | 1       | 9                | Y   | 43179     | Glyceraldehyde-3-phosphate dehydrogenase OS=Arachis hypogaea OX=3818 PE=2 SV=1         |
| 59                | 118        | B4UW57 B4UW57_ARAHY         | 53.39  | 6            | 6                       | 3.2436E4        | 1         | 1       | 2                | Y   | 24268     | Putative dihydroflavonol reductase (Fragment) OS=Arachis hypogaea OX=3818 PE=2 SV=1    |
| 76                | 134        | E9JSA9 E9JSA9_ARAHY         | 44.46  | 5            | 5                       | 3.8207E4        | 1         | 1       | 1                | N   | 46210     | Acyl-[acyl-carrier-protein] desaturase OS=Arachis hypogaea OX=3818 GN=SAD1-2 PE=2 SV=1 |
| 76                | 136        | E9JSA8 E9JSA8_ARAHY         | 44.46  | 5            | 5                       | 3.8207E4        | 1         | 1       | 1                | N   | 46324     | Acyl-[acyl-carrier-protein] desaturase OS=Arachis hypogaea OX=3818 GN=SAD1-1 PE=2 SV=1 |
| 76                | 135        | B6ECZ0 B6ECZ0_ARAHY         | 44.46  | 5            | 5                       | 3.8207E4        | 1         | 1       | 1                | N   | 46252     | Acyl-[acyl-carrier-protein] desaturase OS=Arachis hypogaea OX=3818 PE=2 SV=1           |
| 71                | 110        | U3MF97 U3MF97_ARAHY         | 33.42  | 19           | 19                      | 0               | 1         | 1       | 1                | Y   | 15748     | 40S ribosomal protein S23 OS=Arachis hypogaea OX=3818 PE=2 SV=1                        |
| total 73 proteins |            |                             |        |              |                         |                 |           |         |                  |     |           |                                                                                        |

sp|P43237|ALL11\_ARAHY

back to list

| [Protein Coverage](#) | [Supporting Peptides](#) |

Protein Coverage:

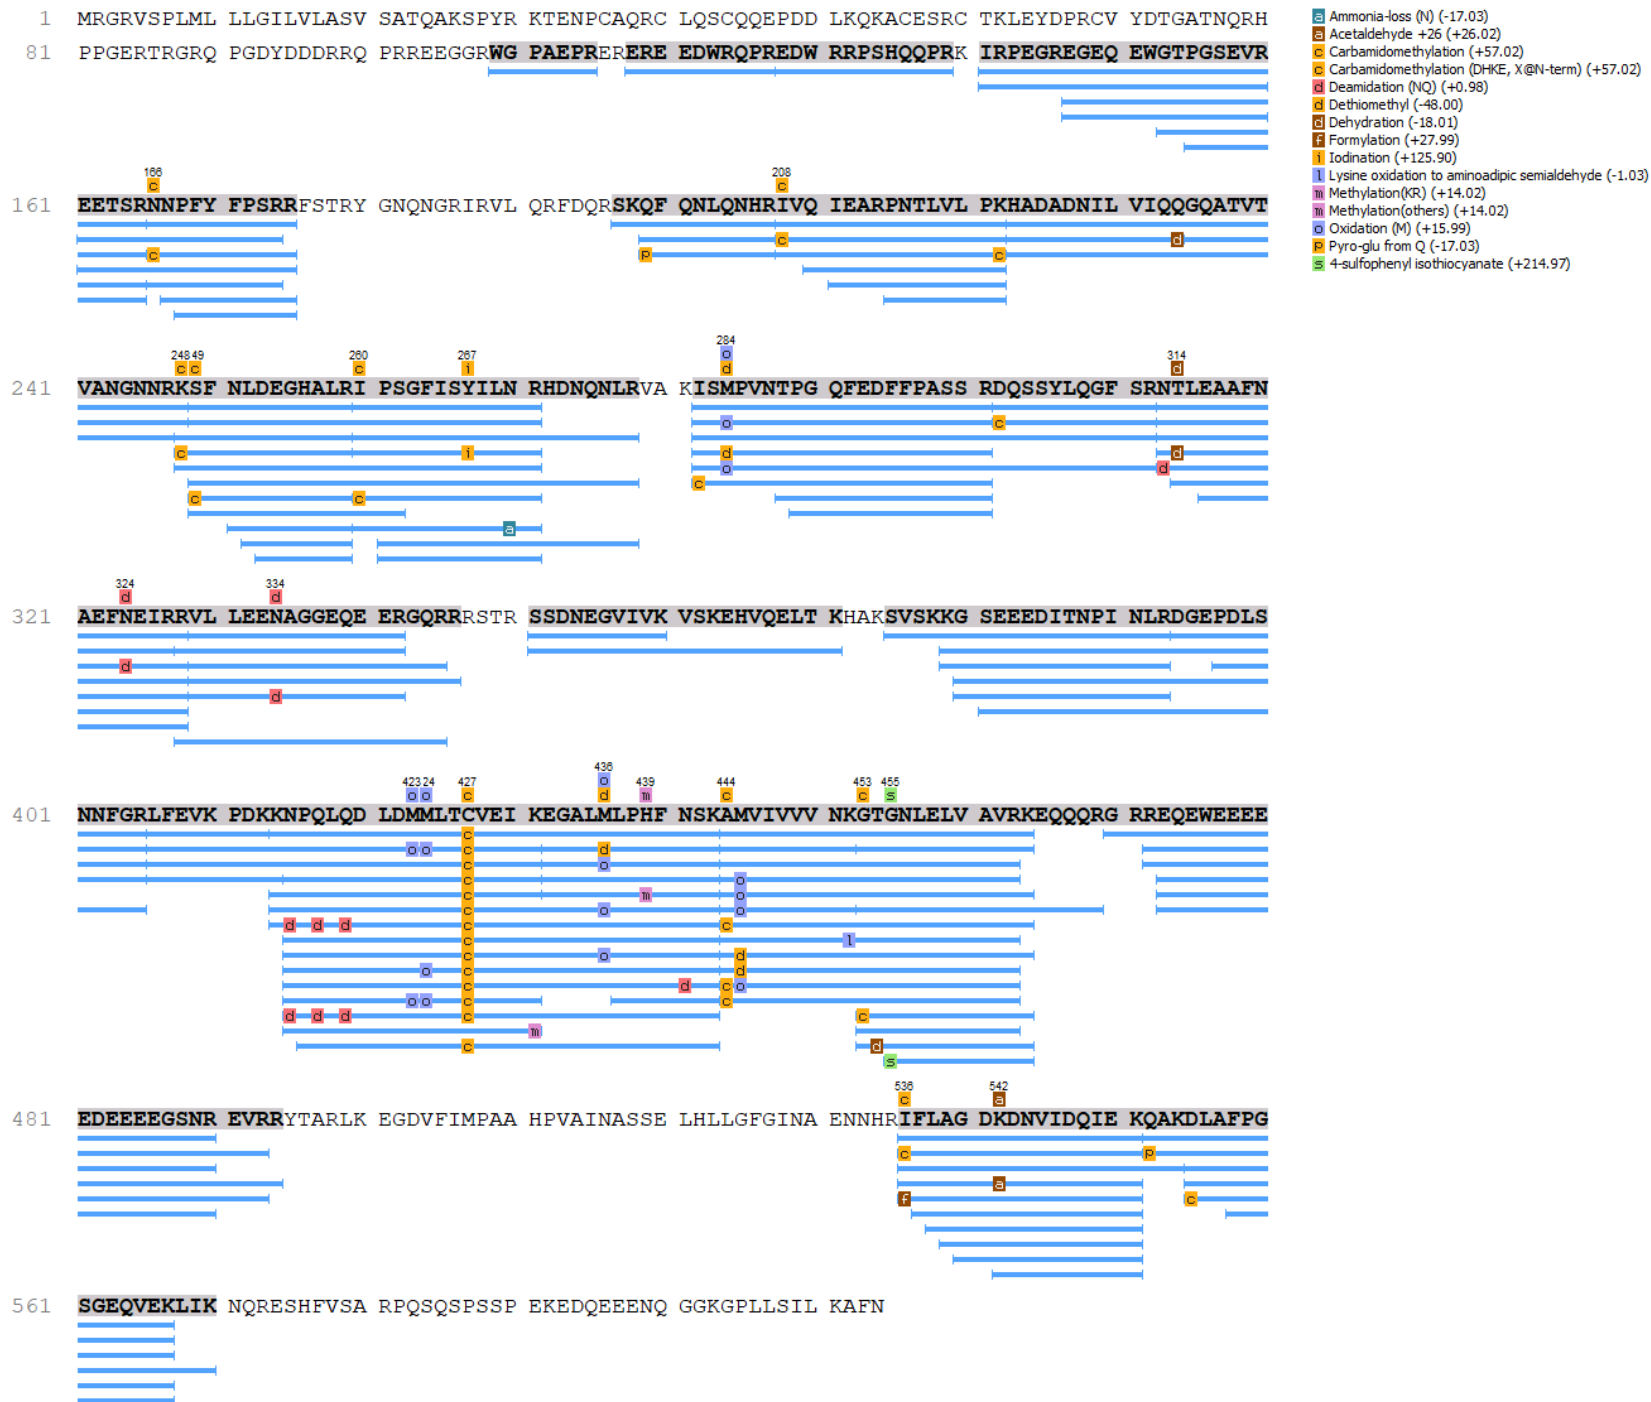

## Supporting Peptides:

| Peptide                                  | Uniq | -10lgP | Mass      | Length | ppm  | m/z       | z | RT    | Fraction | Scan     | Source File        | Area Raw in gel | #Feature | #Feature Raw in gel | Start | End | PTM                  | AScore                                                   | Found By |
|------------------------------------------|------|--------|-----------|--------|------|-----------|---|-------|----------|----------|--------------------|-----------------|----------|---------------------|-------|-----|----------------------|----------------------------------------------------------|----------|
| K.HADADNILVIQQGQATVTVAN(+.98)GNNRK.S     | N    | 140.09 | 2747.3950 | 26     | -1.1 | 916.8046  | 3 | 29.38 | 14       | F14:1509 | OB5941 H1 raw.raw  | 3.7837E8        | 20       | 20                  | 223   | 248 |                      | N21:Deamidation (N Q):26.31                              | PEAKS DB |
| K.KNPQLQDLDMMLTC(+57.02)VEIK.E           | N    | 137.14 | 2175.0737 | 18     | 2.4  | 1088.5468 | 2 | 34.90 | 14       | F14:1774 | OB5941 H1 raw.raw  | 4.1086E6        | 3        | 3                   | 414   | 431 | Carbamidomethylation | C14:Carbamidomethylation:1000.00                         | PEAKS DB |
| K.HADADNILVIQQGQATVTVANGNNR.K            | N    | 135.84 | 2618.3162 | 25     | 2.9  | 1310.1692 | 2 | 30.42 | 14       | F14:1494 | OB5941 H1 raw.raw  | 5.8142E6        | 3        | 3                   | 223   | 247 |                      |                                                          | PEAKS DB |
| K.ISMPVNTPGQFEDFFPASSR.D                 | N    | 135.58 | 2226.0415 | 20     | 1.9  | 1114.0302 | 2 | 35.63 | 14       | F14:1807 | OB5941 H1 raw.raw  | 2.1661E8        | 32       | 26                  | 282   | 301 |                      |                                                          | PEAKS DB |
| K.ISM(+15.99)PVNTPGQFEDFFPASSR.D         | N    | 134.77 | 2242.0364 | 20     | 2.3  | 1122.0281 | 2 | 34.42 | 2        | F2:1522  | OB5925 H3B raw.raw | 1.6845E7        | 19       | 17                  | 282   | 301 | Oxidation (M)        | M3:Oxidation (M):100 0.00                                | PEAKS DB |
| K.NPQLQDLDMMLTC(+57.02)VEIK.E            | N    | 131.65 | 2046.9788 | 17     | -0.8 | 1024.4958 | 2 | 36.89 | 14       | F14:1903 | OB5941 H1 raw.raw  | 1.2559E7        | 8        | 8                   | 415   | 431 | Carbamidomethylation | C13:Carbamidomethylation:1000.00                         | PEAKS DB |
| R.EQEWEHEHEHEHEGNSR.E                    | N    | 130.87 | 2280.8413 | 18     | 4.3  | 1141.4329 | 2 | 28.13 | 14       | F14:1352 | OB5941 H1 raw.raw  | 4.0373E6        | 3        | 3                   | 473   | 490 |                      |                                                          | PEAKS DB |
| K.NPQLQDLDM(+15.99)MLTC(+57.02)VEIK.E    | N    | 128.59 | 2062.9736 | 17     | -6.6 | 1032.4873 | 2 | 36.34 | 14       | F14:1860 | OB5941 H1 raw.raw  | 2.4371E5        | 2        | 2                   | 415   | 431 | Carbamidomethylation | M9:Oxidation (M):30.46;C13:Carbamidomethylation:10 00.00 | PEAKS DB |
| R.NTLEAAFNAEFNEIR.R                      | N    | 126.11 | 1737.8322 | 15     | 3.3  | 869.9262  | 2 | 35.27 | 14       | F14:1792 | OB5941 H1 raw.raw  | 1.3691E7        | 6        | 6                   | 313   | 327 |                      |                                                          | PEAKS DB |
| K.HADADNILVIQQGQATVTVANGNNRK.S           | N    | 120.98 | 2746.4111 | 26     | 4.7  | 1374.2192 | 2 | 29.02 | 14       | F14:1406 | OB5941 H1 raw.raw  | 4.4412E7        | 13       | 13                  | 223   | 248 |                      |                                                          | PEAKS DB |
| K.SFNLDEGHALRIPSGFISYLNR.H               | N    | 117.92 | 2618.3604 | 23     | 0.6  | 1310.1882 | 2 | 36.89 | 14       | F14:1902 | OB5941 H1 raw.raw  | 2.1092E8        | 40       | 39                  | 249   | 271 |                      |                                                          | PEAKS DB |
| R.VLLEENAGGEQEER.G                       | N    | 114.70 | 1571.7427 | 14     | 1.1  | 786.8795  | 2 | 26.65 | 14       | F14:1250 | OB5941 H1 raw.raw  | 1.2337E7        | 7        | 7                   | 329   | 342 |                      |                                                          | PEAKS DB |
| R.IFLAGDKDNVIDQIEKQAK.D                  | N    | 113.07 | 2144.1477 | 19     | 1.1  | 715.7240  | 3 | 32.93 | 7        | F7:1578  | OB5934 H3B raw.raw | 5.566E7         | 12       | 12                  | 536   | 554 |                      |                                                          | PEAKS DB |
| K.AMVIVVVKGTGNLELVAVR.K                  | N    | 112.17 | 2081.2031 | 20     | 1.5  | 694.7427  | 3 | 34.35 | 14       | F14:1739 | OB5941 H1 raw.raw  | 7.0931E7        | 12       | 12                  | 444   | 463 |                      |                                                          | PEAKS DB |
| R.KSFNLDEGHALR.I                         | N    | 112.03 | 1385.7051 | 12     | 1.1  | 693.8606  | 2 | 25.70 | 14       | F14:1202 | OB5941 H1 raw.raw  | 3.2948E6        | 6        | 6                   | 248   | 259 |                      |                                                          | PEAKS DB |
| R.IPSGFISYLNR.H                          | N    | 111.89 | 1378.7609 | 12     | 1.5  | 690.3887  | 2 | 43.03 | 14       | F14:2242 | OB5941 H1 raw.raw  | 2.1426E8        | 15       | 15                  | 260   | 271 |                      |                                                          | PEAKS DB |
| R.DQSSYLQGFSR.N                          | N    | 110.94 | 1286.5891 | 11     | -1.4 | 644.3009  | 2 | 30.60 | 14       | F14:1505 | OB5941 H1 raw.raw  | 6.2405E7        | 21       | 21                  | 302   | 312 |                      |                                                          | PEAKS DB |
| K.KGSEEDITNPINLR.D                       | N    | 110.67 | 1713.8533 | 15     | 3.2  | 857.9366  | 2 | 28.85 | 14       | F14:1395 | OB5941 H1 raw.raw  | 1.2495E7        | 8        | 8                   | 379   | 393 |                      |                                                          | PEAKS DB |
| K.NPQLQDLDMMLTC(+57.02)VEIKEGALMLPHFSK.A | N    | 110.02 | 3371.6387 | 29     | -0.1 | 1686.8264 | 2 | 37.85 | 14       | F14:1946 | OB5941 H1 raw.raw  | 1.7936E8        | 14       | 14                  | 415   | 443 | Carbamidomethylation | C13:Carbamidomethylation:1000.00                         | PEAKS DB |
| K.AMVIVVVKGTGNLELVAVRK.E                 | N    | 109.98 | 2209.2981 | 21     | -1.4 | 1105.6548 | 2 | 32.55 | 14       | F14:1615 | OB5941 H1 raw.raw  | 2.9136E8        | 18       | 18                  | 444   | 464 |                      |                                                          | PEAKS DB |
| total 219 peptides                       |      |        |           |        |      |           |   |       |          |          |                    |                 |          |                     |       |     |                      |                                                          |          |



| Peptide                                                 | Uniq | -10lgP | Mass      | Length | ppm  | m/z       | z | RT    | Fraction | Scan     | Source File       | Area Raw in gel | #Feature | #Feature Raw in gel | Start | End | PTM                                   | AScore                                           | Found By  |
|---------------------------------------------------------|------|--------|-----------|--------|------|-----------|---|-------|----------|----------|-------------------|-----------------|----------|---------------------|-------|-----|---------------------------------------|--------------------------------------------------|-----------|
| K.AM(+15.99)VIVVVNKG <sup>T</sup> GNLELVAVR.K           | N    | 109.59 | 2097.1980 | 20     | -2.2 | 1049.6040 | 2 | 32.73 | 14       | F14:1638 | OB5941 H1 raw.raw | 3.1537E7        | 10       | 10                  | 444   | 463 | Oxidation (M)                         | M2:Oxidation (M):100.0.00                        | PEAKS DB  |
| K.SFNLDEGHALR.I                                         | N    | 109.41 | 1257.6101 | 11     | -3.3 | 629.8102  | 2 | 27.77 | 14       | F14:1329 | OB5941 H1 raw.raw | 7.2473E7        | 30       | 30                  | 249   | 259 |                                       |                                                  | PEAKS DB  |
| R.IFLAGDKDNVIDQIEK.Q                                    | N    | 108.13 | 1816.9570 | 16     | 0.2  | 909.4860  | 2 | 33.10 | 14       | F14:1683 | OB5941 H1 raw.raw | 7.2865E8        | 41       | 41                  | 536   | 551 |                                       |                                                  | PEAKS DB  |
| R.KSFNLDEGHALRIPSGFISYILNR.H                            | N    | 107.80 | 2746.4553 | 24     | -2.1 | 916.4905  | 3 | 36.16 | 12       | F12:1802 | OB5939 H1 raw.raw | 7.186E6         | 4        | 4                   | 248   | 271 |                                       |                                                  | PEAKS DB  |
| K.GSEEDITNPINLRDGE <sup>P</sup> DL <sup>S</sup> NNFGR.L | N    | 107.18 | 2887.3220 | 26     | -1.7 | 963.4464  | 3 | 32.55 | 14       | F14:1626 | OB5941 H1 raw.raw | 4.5198E7        | 9        | 9                   | 380   | 405 |                                       |                                                  | PEAKS DB  |
| R.EGEQEWGTPGSEVR.E                                      | Y    | 105.02 | 1559.6852 | 14     | -4.9 | 780.8460  | 2 | 27.77 | 14       | F14:1333 | OB5941 H1 raw.raw | 7.2805E5        | 3        | 3                   | 147   | 160 |                                       |                                                  | PEAKS DB  |
| R.I(+57.02)PSGFISYILNR.H                                | N    | 104.65 | 1435.7823 | 12     | -1.7 | 718.8972  | 2 | 36.52 | 14       | F14:1869 | OB5941 H1 raw.raw | 1.3017E7        | 3        | 3                   | 260   | 271 | Carbamidomethylation (DHKE, X@N-term) | I1:Carbamidomethylation (DHKE, X@N-term):1000.00 | PEAKS PTM |
| R.VLLEENAGGEQEERGQR.R                                   | N    | 104.46 | 1912.9238 | 17     | 1.8  | 957.4709  | 2 | 25.31 | 14       | F14:1182 | OB5941 H1 raw.raw | 1.9161E6        | 8        | 8                   | 329   | 345 |                                       |                                                  | PEAKS DB  |
| R.I(+57.02)FLAGDKDNVIDQIEK.Q                            | N    | 103.96 | 1873.9785 | 16     | -5.0 | 937.9919  | 2 | 32.19 | 14       | F14:1619 | OB5941 H1 raw.raw | 4.5184E7        | 7        | 7                   | 536   | 551 | Carbamidomethylation (DHKE, X@N-term) | I1:Carbamidomethylation (DHKE, X@N-term):90.91   | PEAKS PTM |
| R.DGE <sup>P</sup> DL <sup>S</sup> NNFGR.L              | N    | 102.95 | 1319.5742 | 12     | 0.8  | 660.7949  | 2 | 29.02 | 14       | F14:1398 | OB5941 H1 raw.raw | 3.2103E6        | 3        | 3                   | 394   | 405 |                                       |                                                  | PEAKS DB  |
| K.QAKDLAFPGSGEQVEK.L                                    | N    | 102.73 | 1702.8525 | 16     | 1.8  | 852.4351  | 2 | 26.85 | 14       | F14:1278 | OB5941 H1 raw.raw | 1.286E6         | 6        | 6                   | 552   | 567 |                                       |                                                  | PEAKS DB  |
| K.H(+57.02)ADADNILVIQGGQATVTVANGNNRK.S                  | N    | 102.10 | 2803.4324 | 26     | -1.3 | 935.4835  | 3 | 29.92 | 14       | F14:1452 | OB5941 H1 raw.raw | 1.6897E6        | 1        | 1                   | 223   | 248 |                                       | H1:Carbamidomethylation (DHKE, X@N-term):39.76   | PEAKS PTM |
| K.DLAFPGSGEQVEK.L                                       | N    | 101.44 | 1375.6619 | 13     | -2.0 | 688.8369  | 2 | 30.08 | 14       | F14:1472 | OB5941 H1 raw.raw | 6.5563E7        | 9        | 9                   | 555   | 567 |                                       |                                                  | PEAKS DB  |
| K.NPQLQLDMMMLTCVEIK(+14.02).E                           | N    | 101.30 | 2003.9730 | 17     | 2.1  | 1002.9958 | 2 | 38.00 | 14       | F14:1960 | OB5941 H1 raw.raw | 6.7851E5        | 2        | 2                   | 415   | 431 | Methylation(KR)                       | K17:Methylation(KR):1000.00                      | PEAKS PTM |
| K.S(+57.02)FN <sup>L</sup> DEGHALR.I                    | N    | 100.96 | 1314.6316 | 11     | 0.8  | 658.3236  | 2 | 27.59 | 14       | F14:1340 | OB5941 H1 raw.raw | 5.6012E6        | 7        | 7                   | 249   | 259 | Carbamidomethylation (DHKE, X@N-term) | S1:Carbamidomethylation (DHKE, X@N-term):101.71  | PEAKS PTM |
| R.RVLLEENAGGEQEER.G                                     | N    | 98.06  | 1727.8438 | 15     | 0.4  | 576.9554  | 3 | 24.77 | 13       | F13:1156 | OB5940 H1 raw.raw | 1.2517E5        | 5        | 5                   | 328   | 342 |                                       |                                                  | PEAKS DB  |
| R.IPSGFISYILNRHDNQNLR.V                                 | N    | 97.42  | 2256.1763 | 19     | 0.5  | 565.0516  | 4 | 33.66 | 14       | F14:1693 | OB5941 H1 raw.raw | 3.392E8         | 42       | 42                  | 260   | 278 |                                       |                                                  | PEAKS DB  |
| K.GSEEDITNPINLR.D                                       | N    | 97.01  | 1585.7583 | 14     | 2.4  | 793.8884  | 2 | 30.93 | 14       | F14:1527 | OB5941 H1 raw.raw | 3.0498E6        | 3        | 3                   | 380   | 393 |                                       |                                                  | PEAKS DB  |
| K.AM(+15.99)VIVVVNKG <sup>T</sup> GNLELVAVRK.E          | N    | 96.33  | 2225.2930 | 21     | -0.4 | 1113.6533 | 2 | 30.76 | 14       | F14:1520 | OB5941 H1 raw.raw | 4.0787E7        | 8        | 7                   | 444   | 464 | Oxidation (M)                         | M2:Oxidation (M):100.0.00                        | PEAKS DB  |
| R.EGEQEWGTPGSEVRETSR.N                                  | Y    | 95.70  | 2161.9512 | 19     | 2.5  | 1081.9856 | 2 | 27.60 | 14       | F14:1311 | OB5941 H1 raw.raw | 2.0479E7        | 9        | 9                   | 147   | 165 |                                       |                                                  | PEAKS DB  |
| total 219 peptides                                      |      |        |           |        |      |           |   |       |          |          |                   |                 |          |                     |       |     |                                       |                                                  |           |

| Peptide                                           | Uniq | -10lgP | Mass      | Length | ppm  | m/z       | z | RT    | Fraction | Scan     | Source File        | Area Raw in gel | #Feature | #Feature Raw in gel | Start | End | PTM                                                                       | AScore                                                   | Found By  |
|---------------------------------------------------|------|--------|-----------|--------|------|-----------|---|-------|----------|----------|--------------------|-----------------|----------|---------------------|-------|-----|---------------------------------------------------------------------------|----------------------------------------------------------|-----------|
| K.KNPQLQLDMM(+15.99)LTC(+57.02)VEIK.E             | N    | 95.01  | 2191.0686 | 18     | -3.4 | 1096.5378 | 2 | 32.73 | 14       | F14:1643 | OB5941 H1 raw.raw  | 1.9787E5        | 1        | 1                   | 414   | 431 | Carbamidomethylation                                                      | M11:Oxidation (M):9.34;C14:Carbamidomethylation:100.00   | PEAKS DB  |
| K.NPQLQLDMM(-48.00)LTC(+57.02)VEIK.E              | N    | 93.52  | 1998.9755 | 17     | -2.5 | 1000.4926 | 2 | 32.55 | 14       | F14:1628 | OB5941 H1 raw.raw  | 1.3958E7        | 5        | 5                   | 415   | 431 | Carbamidomethylation                                                      | M10:Dethiomethyl:27.96;C13:Carbamidomethylation:100.00   | PEAKS PTM |
| K.NPQLQLDMM(+15.99)MLTC(+57.02)VEIKEGALMLPHFNSK.A | N    | 92.22  | 3387.6335 | 29     | -1.5 | 1130.2168 | 3 | 36.17 | 14       | F14:1926 | OB5941 H1 raw.raw  | 2.8061E7        | 4        | 4                   | 415   | 443 | Carbamidomethylation                                                      | M9:Oxidation (M):10.11;C13:Carbamidomethylation:100.00   | PEAKS DB  |
| R.NNPFYFPSRR.F                                    | N    | 92.08  | 1296.6364 | 10     | -3.0 | 649.3235  | 2 | 28.67 | 14       | F14:1408 | OB5941 H1 raw.raw  | 1.2788E8        | 21       | 21                  | 166   | 175 |                                                                           |                                                          | PEAKS DB  |
| K.EGALM(+15.99)LPHFNSK.A                          | N    | 91.98  | 1358.6653 | 12     | 2.1  | 680.3414  | 2 | 29.74 | 14       | F14:1443 | OB5941 H1 raw.raw  | 1.9561E6        | 3        | 3                   | 432   | 443 | Oxidation (M)                                                             | M5:Oxidation (M):100.00                                  | PEAKS DB  |
| R.VLLEENAGGEQEERGQRR.R                            | N    | 91.09  | 2069.0249 | 18     | 2.1  | 690.6837  | 3 | 25.31 | 14       | F14:1186 | OB5941 H1 raw.raw  | 1.1888E6        | 3        | 3                   | 329   | 346 |                                                                           |                                                          | PEAKS DB  |
| R.SSDNEGVIVKVSKEHVQLTK.H                          | N    | 91.01  | 2325.2175 | 21     | 1.3  | 776.0808  | 3 | 28.31 | 14       | F14:1362 | OB5941 H1 raw.raw  | 1.0201E5        | 2        | 2                   | 351   | 371 |                                                                           |                                                          | PEAKS DB  |
| K.KNPQLQLDMM(+15.99)LTC(+57.02)VEIKEGALMLPHFNSK.A | N    | 90.76  | 3515.7285 | 30     | -2.7 | 879.9370  | 4 | 34.52 | 13       | F13:1755 | OB5940 H1 raw.raw  | 2.6989E6        | 3        | 3                   | 414   | 443 | Carbamidomethylation                                                      | M11:Oxidation (M):30.46;C14:Carbamidomethylation:100.00  | PEAKS DB  |
| K.AM(-48.00)VIVVVNKG TGNLELVAVR.K                 | N    | 90.57  | 2033.1997 | 20     | -3.4 | 1017.6036 | 2 | 31.46 | 14       | F14:1539 | OB5941 H1 raw.raw  | 1.6588E7        | 6        | 6                   | 444   | 463 | Dethiomethyl                                                              | M2:Dethiomethyl:100.00                                   | PEAKS PTM |
| K.A(+57.02)MVIVVVNKG TGNLELVAVR.K                 | N    | 90.54  | 2138.2246 | 20     | -0.9 | 1070.1187 | 2 | 34.35 | 14       | F14:1737 | OB5941 H1 raw.raw  | 5.6414E6        | 3        | 3                   | 444   | 463 | Carbamidomethylation (DHKE, X@N-term)                                     | A1:Carbamidomethylation (DHKE, X@N-term):207.56          | PEAKS PTM |
| K.NPQLQLDMMMLTC(+57.02)VEIKEGALM(+15.99)LPHFNSK.A | N    | 90.37  | 3387.6335 | 29     | -1.5 | 1130.2168 | 3 | 36.17 | 14       | F14:1895 | OB5941 H1 raw.raw  | 3.1109E7        | 7        | 7                   | 415   | 443 | Carbamidomethylation; Oxidation (M)                                       | C13:Carbamidomethylation:1000.00;M22:Oxidation (M):69.89 | PEAKS DB  |
| K.H(+57.02)ADADNILVIQGGQATVTVAN(+.98)GNNRK.S      | N    | 90.07  | 2804.4165 | 26     | -1.3 | 935.8115  | 3 | 30.08 | 14       | F14:1476 | OB5941 H1 raw.raw  | 6.8084E6        | 2        | 2                   | 223   | 248 | H1:Carbamidomethylation (DHKE, X@N-term):45.01;N21:Deamidation (NQ):14.04 |                                                          | PEAKS PTM |
| K.KGSEEDITNPINLRDGEPLDLSNNFGR.L                   | N    | 89.87  | 3015.4170 | 27     | -4.2 | 1006.1421 | 3 | 31.29 | 14       | F14:1549 | OB5941 H1 raw.raw  | 7.6E7           | 16       | 16                  | 379   | 405 |                                                                           |                                                          | PEAKS DB  |
| F.LAGDKDNVIDQIEK.Q                                | N    | 89.22  | 1556.8046 | 14     | -3.2 | 779.4071  | 2 | 32.19 | 12       | F12:1557 | OB5939 H1 raw.raw  | 4.4864E6        | 2        | 2                   | 538   | 551 |                                                                           |                                                          | PEAKS DB  |
| K.I(+57.02)SMPVNTPGQFEDFFPASSR.D                  | N    | 88.49  | 2283.0630 | 20     | -0.1 | 1142.5387 | 2 | 35.84 | 12       | F12:1793 | OB5939 H1 raw.raw  | 6.4772E5        | 1        | 1                   | 282   | 301 | Carbamidomethylation (DHKE, X@N-term)                                     | I1:Carbamidomethylation (DHKE, X@N-term):156.03          | PEAKS PTM |
| K.DLAFIGSGEQVEKLIK.N                              | N    | 87.96  | 1729.9249 | 16     | 1.0  | 865.9706  | 2 | 33.30 | 7        | F7:1601  | OB5934 H3B raw.raw | 6.2551E5        | 3        | 3                   | 555   | 570 |                                                                           |                                                          | PEAKS DB  |
| total 219 peptides                                |      |        |           |        |      |           |   |       |          |          |                    |                 |          |                     |       |     |                                                                           |                                                          |           |

| Peptide                                    | Uniq | -10lgP | Mass      | Length | ppm  | m/z       | z | RT    | Fraction | Scan     | Source File       | Area Raw in gel | #Feature | #Feature Raw in gel | Start | End | PTM                                   | AScore                                                   | Found By  |
|--------------------------------------------|------|--------|-----------|--------|------|-----------|---|-------|----------|----------|-------------------|-----------------|----------|---------------------|-------|-----|---------------------------------------|----------------------------------------------------------|-----------|
| K.EGALMLPHFNSK.A                           | N    | 87.95  | 1342.6703 | 12     | 2.5  | 672.3441  | 2 | 29.83 | 13       | F13:1462 | OB5940 H1 raw.raw | 9.3502E6        | 3        | 3                   | 432   | 443 |                                       |                                                          | PEAKS DB  |
| K.HADADNILVIQQGQATVTVAN(+.98)GNNR.K        | N    | 87.06  | 2619.3000 | 25     | -1.2 | 1310.6558 | 2 | 30.35 | 13       | F13:1535 | OB5940 H1 raw.raw | 4.8683E6        | 1        | 1                   | 223   | 247 |                                       | N21:Deamidation (N Q):7.32                               | PEAKS DB  |
| K.AMVIVVVK.G                               | N    | 86.97  | 971.5837  | 9      | 0.9  | 486.7996  | 2 | 29.88 | 12       | F12:1441 | OB5939 H1 raw.raw | 9.5124E6        | 3        | 3                   | 444   | 452 |                                       |                                                          | PEAKS DB  |
| K.GTGNLELVAVR.K                            | N    | 86.65  | 1127.6299 | 11     | -0.8 | 564.8218  | 2 | 29.74 | 14       | F14:1450 | OB5941 H1 raw.raw | 1.0907E7        | 6        | 6                   | 453   | 463 |                                       |                                                          | PEAKS DB  |
| R.NNPFYFPSR.R                              | N    | 86.37  | 1140.5352 | 9      | -3.8 | 571.2727  | 2 | 31.46 | 14       | F14:1552 | OB5941 H1 raw.raw | 1.201E7         | 5        | 5                   | 166   | 174 |                                       |                                                          | PEAKS DB  |
| K.HADADNILVIQQGQATVTVAN(-17.03)GNNRK.S     | N    | 86.12  | 2729.3845 | 26     | -1.1 | 910.8011  | 3 | 29.38 | 14       | F14:1429 | OB5941 H1 raw.raw | 8.2265E6        | 4        | 4                   | 223   | 248 |                                       | N21:Ammonia-loss (N):18.53                               | PEAKS PTM |
| R.NTLEAAFNAEFNEIRR.V                       | N    | 86.03  | 1893.9332 | 16     | -3.6 | 947.9705  | 2 | 35.28 | 12       | F12:1741 | OB5939 H1 raw.raw | 3.4229E8        | 38       | 38                  | 313   | 328 |                                       |                                                          | PEAKS DB  |
| R.I(+27.99)FLAGDKDNVIDQIEK.Q               | N    | 85.41  | 1844.9519 | 16     | 5.2  | 923.4880  | 2 | 36.16 | 14       | F14:1844 | OB5941 H1 raw.raw | 0               | 0        | 0                   | 536   | 551 | Formylation                           | I1:Formylation:77.93                                     | PEAKS PTM |
| K.SFNLDEGH(+57.02)ALR.I                    | N    | 84.87  | 1314.6316 | 11     | -1.2 | 658.3223  | 2 | 28.05 | 12       | F12:1298 | OB5939 H1 raw.raw | 5.1176E6        | 5        | 5                   | 249   | 259 |                                       | H8:Carbamidomethylation (DHKE, X@N-term):30.36           | PEAKS PTM |
| R.K(+57.02)SFNLDEGHALR.I                   | N    | 83.09  | 1442.7266 | 12     | -0.4 | 481.9159  | 3 | 25.70 | 14       | F14:1209 | OB5941 H1 raw.raw | 2.2174E5        | 3        | 3                   | 248   | 259 | Carbamidomethylation (DHKE, X@N-term) | K1:Carbamidomethylation (DHKE, X@N-term):51.63           | PEAKS PTM |
| K.KNPQLQLDLM(+15.99)MLTC(+57.02)VEIK.E     | N    | 81.54  | 2191.0686 | 18     | 0.7  | 1096.5424 | 2 | 33.03 | 12       | F12:1615 | OB5939 H1 raw.raw | 0               | 0        | 0                   | 414   | 431 | Carbamidomethylation                  | M10:Oxidation (M):14.02;C14:Carbamidomethylation:1000.00 | PEAKS DB  |
| K.KNPQLQLDMLMLTC(+57.02)VEIKEGALMLPHFNSK.A | N    | 81.26  | 3499.7336 | 30     | -0.1 | 875.9406  | 4 | 36.52 | 14       | F14:1868 | OB5941 H1 raw.raw | 1.091E7         | 3        | 3                   | 414   | 443 | Carbamidomethylation                  | C14:Carbamidomethylation:1000.00                         | PEAKS DB  |
| K.GTGNLELVAVRK.E                           | N    | 79.30  | 1255.7249 | 12     | 0.9  | 628.8702  | 2 | 26.85 | 14       | F14:1263 | OB5941 H1 raw.raw | 1.0437E7        | 9        | 9                   | 453   | 464 |                                       |                                                          | PEAKS DB  |
| R.GRREQEWEEEEEEEEEGSNR.E                   | N    | 79.15  | 2650.0649 | 21     | 0.3  | 884.3625  | 3 | 25.64 | 13       | F13:1205 | OB5940 H1 raw.raw | 2.2346E6        | 7        | 7                   | 470   | 490 |                                       |                                                          | PEAKS DB  |
| E.PDLSNNFGR.L                              | N    | 78.38  | 1018.4832 | 9      | -0.1 | 510.2488  | 2 | 31.24 | 14       | F14:1545 | OB5941 H1 raw.raw | 3.5959E6        | 3        | 3                   | 397   | 405 |                                       |                                                          | PEAKS DB  |
| R.EETSRNNPFYFPSRR.F                        | N    | 78.31  | 1898.9023 | 15     | 1.2  | 633.9755  | 3 | 27.17 | 13       | F13:1289 | OB5940 H1 raw.raw | 6.7264E6        | 6        | 6                   | 161   | 175 |                                       |                                                          | PEAKS DB  |
| R.IFLAGDKDNVIDQIE(+57.02)K.Q               | N    | 78.23  | 1873.9785 | 16     | -5.0 | 937.9919  | 2 | 32.19 | 14       | F14:1583 | OB5941 H1 raw.raw | 3.036E7         | 3        | 3                   | 536   | 551 |                                       | E15:Carbamidomethylation (DHKE, X@N-term):0.00           | PEAKS PTM |
| I.PSGFISYILNR.H                            | N    | 77.77  | 1265.6768 | 11     | 2.4  | 633.8472  | 2 | 36.17 | 13       | F13:1844 | OB5940 H1 raw.raw | 2.5204E5        | 2        | 2                   | 261   | 271 |                                       |                                                          | PEAKS DB  |
| I.FLAGDKDNVIDQIEK.Q                        | N    | 77.74  | 1703.8729 | 15     | -9.3 | 852.9358  | 2 | 32.01 | 14       | F14:1599 | OB5941 H1 raw.raw | 1.3574E6        | 3        | 3                   | 537   | 551 |                                       |                                                          | PEAKS DB  |
| K.D(+57.02)LAFPGSGEQVEK.L                  | N    | 77.21  | 1432.6833 | 13     | 3.8  | 717.3517  | 2 | 30.92 | 12       | F12:1485 | OB5939 H1 raw.raw | 2.816E5         | 1        | 1                   | 555   | 567 | Carbamidomethylation (DHKE, X@N-term) | D1:Carbamidomethylation (DHKE, X@N-term)                 | PEAKS PTM |
| total 219 peptides                         |      |        |           |        |      |           |   |       |          |          |                   |                 |          |                     |       |     |                                       |                                                          |           |

| Peptide                                          | Uniq | -10lgP | Mass      | Length | ppm  | m/z       | z | RT    | Fraction | Scan     | Source File              | Area Raw in gel | #Feature | #Feature Raw in gel | Start | End | PTM                                   | AScore                                                                   | Found By  |
|--------------------------------------------------|------|--------|-----------|--------|------|-----------|---|-------|----------|----------|--------------------------|-----------------|----------|---------------------|-------|-----|---------------------------------------|--------------------------------------------------------------------------|-----------|
|                                                  |      |        |           |        |      |           |   |       |          |          |                          |                 |          |                     |       |     |                                       | X@N-term):93.18                                                          |           |
| R.SSDNEGVIVK.V                                   | N    | 76.72  | 1046.5244 | 10     | 0.3  | 524.2697  | 2 | 22.95 | 13       | F13:1057 | OB5940<br>H1<br>raw.raw  | 2.6758E5        | 6        | 6                   | 351   | 360 |                                       |                                                                          | PEAKS DB  |
| K.Q(-17.03)FQNLQNHRI                             | N    | 76.65  | 1166.5581 | 9      | -1.5 | 584.2855  | 2 | 27.77 | 14       | F14:1319 | OB5941<br>H1<br>raw.raw  | 3.3996E6        | 3        | 3                   | 199   | 207 | Pyro-glu from Q                       | Q1:Pyro-glu from Q:1000.00                                               | PEAKS PTM |
| K.HAD(+57.02)ADNILVIQQGQATVTVAN(+.98)GNNRK.S     | N    | 74.85  | 2804.4165 | 26     | -5.0 | 935.8081  | 3 | 28.96 | 13       | F13:1511 | OB5940<br>H1<br>raw.raw  | 3.7976E6        | 1        | 1                   | 223   | 248 |                                       | D3:Carbamidomethylation (DHKE, X@N-term):6.59;N21:Deamidation (NQ):14.04 | PEAKS PTM |
| K.HADADNILVIQQGQATVTVANGN(-17.03)NRK.S           | N    | 74.65  | 2729.3845 | 26     | -3.3 | 1365.6951 | 2 | 29.38 | 14       | F14:1432 | OB5941<br>H1<br>raw.raw  | 5.4978E5        | 1        | 1                   | 223   | 248 |                                       | N23:Ammonia-loss (N):0.00                                                | PEAKS PTM |
| K.ISMPVNTPGQFEDFFPASSRDQSSYLQGFSR.N              | N    | 74.49  | 3494.6201 | 31     | 2.7  | 1165.8838 | 3 | 36.29 | 2        | F2:1620  | OB5925<br>H3B<br>raw.raw | 9.3886E7        | 15       | 15                  | 282   | 312 |                                       |                                                                          | PEAKS DB  |
| R.NTLEAAFNAEFN(+.98)EIRR.V                       | N    | 74.39  | 1894.9172 | 16     | -3.7 | 948.4624  | 2 | 32.73 | 14       | F14:1640 | OB5941<br>H1<br>raw.raw  | 4.113E6         | 3        | 3                   | 313   | 328 | Deamidation (NQ)                      | N12:Deamidation (NQ):55.21                                               | PEAKS DB  |
| R.LFEVKPKKKNPQLQDLDMMLTC(+57.02)VEIK.E           | N    | 73.38  | 3131.6069 | 26     | 3.7  | 1044.8801 | 3 | 33.97 | 13       | F13:1716 | OB5940<br>H1<br>raw.raw  | 3.7487E6        | 3        | 3                   | 406   | 431 | Carbamidomethylation                  | C22:Carbamidomethylation:1000.00                                         | PEAKS DB  |
| K.NPQLQDLDMM(+15.99)LTC(+57.02)VEIKEGALMLPHFSK.A | N    | 73.21  | 3387.6335 | 29     | 5.6  | 847.9204  | 4 | 35.82 | 13       | F13:1825 | OB5940<br>H1<br>raw.raw  | 9.6415E6        | 3        | 3                   | 415   | 443 | Carbamidomethylation                  | M10:Oxidation (M):16.90;C13:Carbamidomethylation:1000.00                 | PEAKS DB  |
| A.GDKDNVIDQIEK.Q                                 | N    | 73.04  | 1372.6833 | 12     | -2.8 | 687.3470  | 2 | 32.19 | 12       | F12:1561 | OB5939<br>H1<br>raw.raw  | 1.4449E6        | 3        | 3                   | 540   | 551 |                                       |                                                                          | PEAKS DB  |
| R.V(+57.02)LLEENAGGEQEER.G                       | N    | 73.00  | 1628.7642 | 14     | 1.1  | 815.3903  | 2 | 27.03 | 14       | F14:1288 | OB5941<br>H1<br>raw.raw  | 2.7852E5        | 3        | 3                   | 329   | 342 |                                       | V1:Carbamidomethylation (DHKE, X@N-term):44.44                           | PEAKS PTM |
| R.EETSRNNPFYFPSR.R                               | N    | 72.75  | 1742.8011 | 14     | -0.9 | 581.9405  | 3 | 29.89 | 12       | F12:1419 | OB5939<br>H1<br>raw.raw  | 4.0306E4        | 1        | 1                   | 161   | 174 |                                       |                                                                          | PEAKS DB  |
| R.IPSGFISYLN(-17.03)R.H                          | N    | 72.57  | 1361.7343 | 12     | 1.4  | 681.8754  | 2 | 37.47 | 13       | F13:1926 | OB5940<br>H1<br>raw.raw  | 5.3561E5        | 2        | 2                   | 260   | 271 | Ammonia-loss (N)                      | N11:Ammonia-loss (N):1000.00                                             | PEAKS PTM |
| R.IPSGFISY(+125.90)ILNR.H                        | N    | 72.49  | 1504.6575 | 12     | 1.5  | 753.3372  | 2 | 37.84 | 13       | F13:1946 | OB5940<br>H1<br>raw.raw  | 9.8379E5        | 2        | 2                   | 260   | 271 | Iodination                            | Y8:Iodination:1000.00                                                    | PEAKS PTM |
| R.IPSGFISYILNRH(+57.02)DNQNL.R.V                 | N    | 72.20  | 2313.1978 | 19     | 2.0  | 579.3079  | 4 | 33.29 | 12       | F12:1633 | OB5939<br>H1<br>raw.raw  | 3.81E7          | 4        | 4                   | 260   | 278 |                                       | H13:Carbamidomethylation (DHKE, X@N-term):9.34                           | PEAKS PTM |
| R.VLLEEN(+.98)AGGEQEER.G                         | N    | 71.59  | 1572.7267 | 14     | -3.7 | 787.3677  | 2 | 26.82 | 13       | F13:1276 | OB5940<br>H1<br>raw.raw  | 0               | 0        | 0                   | 329   | 342 | Deamidation (NQ)                      | N6:Deamidation (NQ):71.64                                                | PEAKS DB  |
| A.FPGSGEQVEK.L                                   | N    | 71.45  | 1076.5138 | 10     | 5.5  | 539.2672  | 2 | 30.23 | 12       | F12:1449 | OB5939<br>H1<br>raw.raw  | 6.1112E4        | 1        | 1                   | 558   | 567 |                                       |                                                                          | PEAKS DB  |
| K.A(+57.02)MVIVVNKGTGNLVLAVRK.E                  | N    | 70.77  | 2266.3196 | 21     | -1.6 | 1134.1653 | 2 | 32.33 | 13       | F13:1602 | OB5940<br>H1<br>raw.raw  | 4.861E7         | 6        | 6                   | 444   | 464 | Carbamidomethylation (DHKE, X@N-term) | A1:Carbamidomethylation (DHKE, X@N-term):161.20                          | PEAKS PTM |
| total 219 peptides                               |      |        |           |        |      |           |   |       |          |          |                          |                 |          |                     |       |     |                                       |                                                                          |           |

| Peptide                                               | Uniq | -10lgP | Mass      | Length | ppm  | m/z       | z | RT    | Fraction | Scan     | Source File        | Area Raw in gel | #Feature | #Feature Raw in gel | Start | End | PTM                                   | AScore                                                                                 | Found By  |
|-------------------------------------------------------|------|--------|-----------|--------|------|-----------|---|-------|----------|----------|--------------------|-----------------|----------|---------------------|-------|-----|---------------------------------------|----------------------------------------------------------------------------------------|-----------|
| K.AM(+15.99)VIVVVNK.G                                 | N    | 70.64  | 987.5787  | 9      | 0.7  | 494.7969  | 2 | 26.66 | 14       | F14:1257 | OB5941 H1 raw.raw  | 8.6431E5        | 3        | 3                   | 444   | 452 | Oxidation (M)                         | M2:Oxidation (M):100.0.00                                                              | PEAKS DB  |
| K.KNPQLQDLMLTLC(+57.02)VEIKEGALM(+15.99)LPHFNSK.A     | N    | 70.55  | 3515.7285 | 30     | -0.8 | 879.9387  | 4 | 35.84 | 12       | F12:1790 | OB5939 H1 raw.raw  | 4.7958E6        | 2        | 2                   | 414   | 443 | Carbamidomethylation; Oxidation (M)   | C14:Carbamidomethylation:1000.00;M23:Oxidation (M):69.38                               | PEAKS DB  |
| K.SVSKKGSEEDITNPINLR.D                                | N    | 69.76  | 2115.0808 | 19     | 2.6  | 706.0361  | 3 | 27.22 | 14       | F14:1299 | OB5941 H1 raw.raw  | 5.5052E4        | 1        | 1                   | 375   | 393 |                                       |                                                                                        | PEAKS DB  |
| Q.GQATVTVAN(+.98)GNNRK.S                              | N    | 69.60  | 1429.7273 | 14     | -4.1 | 715.8680  | 2 | 29.38 | 14       | F14:1424 | OB5941 H1 raw.raw  | 5.134E5         | 2        | 2                   | 235   | 248 |                                       | N9:Deamidation (NQ):41.83                                                              | PEAKS DB  |
| R.NT(-18.01)LEAAFAEFNEIRR.V                           | N    | 68.32  | 1875.9227 | 16     | -3.2 | 626.3129  | 3 | 33.81 | 14       | F14:1704 | OB5941 H1 raw.raw  | 1.3248E7        | 3        | 3                   | 313   | 328 | Dehydration                           | T2:Dehydration:1000.00                                                                 | PEAKS PTM |
| G.SEEEDITNPINLRDGEPLDLSNNFGR.L                        | N    | 67.86  | 2830.3005 | 25     | 1.2  | 944.4419  | 3 | 32.96 | 8        | F8:1576  | OB5935 H3B raw.raw | 5.6172E5        | 3        | 3                   | 381   | 405 |                                       |                                                                                        | PEAKS DB  |
| R.IVQIEARPNTLVLPK.H                                   | Y    | 67.84  | 1690.0140 | 15     | 2.2  | 846.0161  | 2 | 30.65 | 7        | F7:1446  | OB5934 H3B raw.raw | 2.806E8         | 26       | 26                  | 208   | 222 |                                       |                                                                                        | PEAKS DB  |
| R.LFEVKPKKNPQLQDLDM(+15.99)M(+15.99)LTC(+57.02)VEIK.E | N    | 67.75  | 3163.5967 | 26     | 2.1  | 791.9081  | 4 | 32.37 | 12       | F12:1585 | OB5939 H1 raw.raw  | 6.2675E5        | 1        | 1                   | 406   | 431 | Oxidation (M); Carbamidomethylation   | M18:Oxidation (M):100.0.00;M19:Oxidation (M):1000.00;C22:Carbamidomethylation:100.0.00 | PEAKS DB  |
| L.AGDKDNVIDQIEK.Q                                     | N    | 66.85  | 1443.7205 | 13     | -3.1 | 722.8653  | 2 | 32.19 | 12       | F12:1560 | OB5939 H1 raw.raw  | 7.0907E5        | 2        | 2                   | 539   | 551 |                                       |                                                                                        | PEAKS DB  |
| K.G(+57.02)TGNLELVAVRK.E                              | N    | 66.68  | 1312.7462 | 12     | -0.7 | 657.3799  | 2 | 26.85 | 14       | F14:1280 | OB5941 H1 raw.raw  | 3.417E5         | 3        | 3                   | 453   | 464 | Carbamidomethylation (DHKE, X@N-term) | G1:Carbamidomethylation (DHKE, X@N-term):56.51                                         | PEAKS PTM |
| R.EGEQEWGTP(+15.99)GSEVREETSR.N                       | Y    | 66.56  | 2177.9460 | 19     | 1.3  | 726.9902  | 3 | 26.28 | 14       | F14:1241 | OB5941 H1 raw.raw  | 4.0056E6        | 2        | 2                   | 147   | 165 | P9:Oxidation or Hydroxylation:36.47   |                                                                                        | PEAKS PTM |
| K.SFNLDGHALRIPSGFISYILNRHDNQNL.R.V                    | N    | 66.45  | 3495.7759 | 30     | -1.2 | 700.1616  | 5 | 36.31 | 13       | F13:1855 | OB5940 H1 raw.raw  | 1.2605E8        | 16       | 16                  | 249   | 278 |                                       |                                                                                        | PEAKS DB  |
| K.QFQNLQNHR.I                                         | N    | 66.40  | 1183.5846 | 9      | 0.2  | 592.7997  | 2 | 24.53 | 14       | F14:1134 | OB5941 H1 raw.raw  | 7.3427E4        | 5        | 5                   | 199   | 207 |                                       |                                                                                        | PEAKS DB  |
| D.KDNVIDQIEK.Q                                        | N    | 66.36  | 1200.6350 | 10     | -0.8 | 601.3243  | 2 | 25.89 | 14       | F14:1225 | OB5941 H1 raw.raw  | 5.8609E4        | 3        | 3                   | 542   | 551 |                                       |                                                                                        | PEAKS DB  |
| K.NPQLQ(+.98)DLDMMLTLC(+57.02)VEIKEGALMLPHFNSK.A      | N    | 66.16  | 3372.6226 | 29     | 5.7  | 1125.2212 | 3 | 37.84 | 13       | F13:1936 | OB5940 H1 raw.raw  | 5.3127E7        | 3        | 3                   | 415   | 443 | Carbamidomethylation                  | Q5:Deamidation (NQ):32.28;C13:Carbamidomethylation:1000.00                             | PEAKS DB  |
| K.HADADNILVIQGGQATVTVANGNN(+.98)RK.S                  | N    | 65.93  | 2747.3950 | 26     | 4.5  | 1374.7109 | 2 | 29.70 | 10       | F10:1444 | OB5937 H3A raw.raw | 5.6818E5        | 3        | 3                   | 223   | 248 |                                       | N24:Deamidation (NQ):14.02                                                             | PEAKS DB  |
| K.ISMPVNTPGQ(+.98)FEDFFPASSR.D                        | N    | 65.70  | 2227.0254 | 20     | 6.4  | 1114.5271 | 2 | 63.55 | 14       | F14:3427 | OB5941 H1 raw.raw  | 1.0155E4        | 2        | 2                   | 282   | 301 |                                       | Q10:Deamidation (NQ):33.26                                                             | PEAKS DB  |
| R.N(+.98)TLEAAFAEFNEIRR.V                             | N    | 65.61  | 1894.9172 | 16     | 2.2  | 948.4680  | 2 | 35.88 | 12       | F12:1787 | OB5939 H1 raw.raw  | 7.0859E7        | 1        | 1                   | 313   | 328 | Deamidation (NQ)                      | N1:Deamidation (NQ):61.82                                                              | PEAKS DB  |
| total 219 peptides                                    |      |        |           |        |      |           |   |       |          |          |                    |                 |          |                     |       |     |                                       |                                                                                        |           |

| Peptide                                                   | Uniq | -10lgP | Mass      | Length | ppm  | m/z       | z | RT    | Fraction | Scan     | Source File        | Area Raw in gel | #Feature | #Feature Raw in gel | Start | End | PTM                                                  | AScore                                                                          | Found By  |
|-----------------------------------------------------------|------|--------|-----------|--------|------|-----------|---|-------|----------|----------|--------------------|-----------------|----------|---------------------|-------|-----|------------------------------------------------------|---------------------------------------------------------------------------------|-----------|
| K.KNPQLQLDLM(+15.99)MLTC(+57.02)VEIKEGALMLPHFNSK.A        | N    | 65.47  | 3515.7285 | 30     | -3.1 | 879.9366  | 4 | 35.44 | 13       | F13:1830 | OB5940 H1 raw.raw  | 7.2415E6        | 3        | 3                   | 414   | 443 | Carbamidomethylation                                 | M10:Oxidation (M):11.06;C14:Carbamidomethylation:1000.00                        | PEAKS DB  |
| K.ISM(+15.99)PVNTPGQ(+.98)FEDFFPASSRDQSSYLQGFSR.N         | N    | 65.25  | 3511.5989 | 31     | 4.3  | 1171.5453 | 3 | 34.92 | 12       | F12:1731 | OB5939 H1 raw.raw  | 1.4851E6        | 1        | 1                   | 282   | 312 | Oxidation (M)                                        | M3:Oxidation (M):100.00;Q10:Deamidation (NQ):27.62                              | PEAKS DB  |
| K.NPQLQLDLM(+15.99)MLTC(+57.02)VEIKEGALM(+15.99)LPHFNSK.A | N    | 64.53  | 3403.6284 | 29     | 4.5  | 1135.5552 | 3 | 36.52 | 14       | F14:1873 | OB5941 H1 raw.raw  | 4.3451E6        | 3        | 3                   | 415   | 443 | Carbamidomethylation; Oxidation (M)                  | M9:Oxidation (M):10.11;C13:Carbamidomethylation:1000.00;M22:Oxidation (M):53.09 | PEAKS DB  |
| R.LFEVKPKD.K                                              | N    | 63.66  | 974.5436  | 8      | 0.9  | 488.2795  | 2 | 25.40 | 12       | F12:1153 | OB5939 H1 raw.raw  | 6.8606E5        | 7        | 7                   | 406   | 413 |                                                      |                                                                                 | PEAKS DB  |
| F.NLDEGHAI.R                                              | N    | 63.51  | 1023.5097 | 9      | 2.3  | 512.7633  | 2 | 27.35 | 13       | F13:1309 | OB5940 H1 raw.raw  | 1.5878E6        | 3        | 3                   | 251   | 259 |                                                      |                                                                                 | PEAKS DB  |
| R.WGPAEPR.E                                               | Y    | 63.43  | 811.3976  | 7      | 1.2  | 406.7066  | 2 | 25.31 | 14       | F14:1167 | OB5941 H1 raw.raw  | 1.2167E6        | 5        | 5                   | 109   | 115 |                                                      |                                                                                 | PEAKS DB  |
| R.EQEWEHEHEHEHEGNSREVR.R                                  | N    | 63.32  | 2665.0535 | 21     | 2.4  | 889.3606  | 3 | 27.87 | 12       | F12:1308 | OB5939 H1 raw.raw  | 4.1617E5        | 2        | 2                   | 473   | 493 |                                                      |                                                                                 | PEAKS DB  |
| R.REQEWEHEHEHEHEGNSR.E                                    | N    | 63.17  | 2436.9424 | 19     | 2.8  | 1219.4819 | 2 | 26.47 | 14       | F14:1258 | OB5941 H1 raw.raw  | 2.6135E4        | 2        | 2                   | 472   | 490 |                                                      |                                                                                 | PEAKS DB  |
| K.ISM(-48.00)PVNTPGQFEDFFPASSR.D                          | N    | 62.93  | 2178.0381 | 20     | 0.2  | 727.0201  | 3 | 32.37 | 12       | F12:1577 | OB5939 H1 raw.raw  | 2.6788E7        | 5        | 5                   | 282   | 301 | Dethiomethyl                                         | M3:Dethiomethyl:100.00                                                          | PEAKS PTM |
| N.TPGQFEDFFPASSR.D                                        | N    | 62.85  | 1584.7208 | 14     | -0.2 | 793.3676  | 2 | 35.63 | 14       | F14:1821 | OB5941 H1 raw.raw  | 2.1663E5        | 1        | 1                   | 288   | 301 |                                                      |                                                                                 | PEAKS DB  |
| K.A(+57.02)M(+15.99)VIVVVKGTGNLELVAVR.K                   | N    | 62.49  | 2154.2195 | 20     | -0.1 | 1078.1169 | 2 | 32.92 | 12       | F12:1614 | OB5939 H1 raw.raw  | 4.5509E5        | 2        | 2                   | 444   | 463 | Carbamidomethylation (DHKE, X@N-term); Oxidation (M) | A1:Carbamidomethylation (DHKE, X@N-term):139.69; M2:Oxidation (M):100.00        | PEAKS PTM |
| L.EAAFNAEFNEIRR.V                                         | N    | 62.30  | 1565.7585 | 13     | -4.7 | 783.8829  | 2 | 34.06 | 12       | F12:1677 | OB5939 H1 raw.raw  | 6.1232E5        | 1        | 1                   | 316   | 328 |                                                      |                                                                                 | PEAKS DB  |
| K.N(+.98)PQLQLDMLMLTC(+57.02)VEIKEGALMLPHFNSK.A           | N    | 61.86  | 3372.6226 | 29     | 5.7  | 1125.2212 | 3 | 37.84 | 13       | F13:1983 | OB5940 H1 raw.raw  | 1.2903E7        | 1        | 1                   | 415   | 443 | Carbamidomethylation                                 | N1:Deamidation (NQ):14.04;C13:Carbamidomethylation:1000.00                      | PEAKS DB  |
| K.HADADNIIQVQGG(+.98)ATVTVAN(+.98)GNNRK.S                 | N    | 61.75  | 2748.3792 | 26     | 1.4  | 1375.1987 | 2 | 29.55 | 13       | F13:1443 | OB5940 H1 raw.raw  | 4.856E5         | 1        | 1                   | 223   | 248 |                                                      | Q14:Deamidation (NQ):32.28;N21:Deamidation (NQ):14.04                           | PEAKS DB  |
| N.LDEGHAI.R                                               | N    | 60.44  | 909.4668  | 8      | 0.6  | 455.7409  | 2 | 27.35 | 13       | F13:1312 | OB5940 H1 raw.raw  | 3.1152E4        | 1        | 1                   | 252   | 259 |                                                      |                                                                                 | PEAKS DB  |
| R.IFLAGDKDNVIDQ(+.98)IEKQAK.D                             | N    | 58.72  | 2145.1316 | 19     | 9.3  | 716.0578  | 3 | 32.93 | 2        | F2:1432  | OB5925 H3B raw.raw | 1.5596E6        | 1        | 1                   | 536   | 554 |                                                      | Q13:Deamidation (NQ):0.00                                                       | PEAKS DB  |
| K.HADADNIIQV(+.98)Q(+.98)GQATVTVAN(+.98)GNNRK.S           | N    | 58.62  | 2749.3630 | 26     | 9.6  | 917.4705  | 3 | 30.18 | 13       | F13:1524 | OB5940 H1 raw.raw  | 4.3812E6        | 1        | 1                   | 223   | 248 |                                                      | Q11:Deamidation (NQ):26.52;Q                                                    | PEAKS DB  |
| total 219 peptides                                        |      |        |           |        |      |           |   |       |          |          |                    |                 |          |                     |       |     |                                                      |                                                                                 |           |

| Peptide                                          | Uniq | -10lgP | Mass      | Length | ppm  | m/z       | z | RT    | Fraction | Scan     | Source File       | Area Raw in gel | #Feature | #Feature Raw in gel | Start | End | PTM                                   | AScore                                                                           | Found By  |
|--------------------------------------------------|------|--------|-----------|--------|------|-----------|---|-------|----------|----------|-------------------|-----------------|----------|---------------------|-------|-----|---------------------------------------|----------------------------------------------------------------------------------|-----------|
|                                                  |      |        |           |        |      |           |   |       |          |          |                   |                 |          |                     |       |     |                                       | 12:Deamidation (NQ):18.53;N21:Deamidation (NQ):14.04                             |           |
| R.D(+57.02)QSSYLQGFSR.N                          | N    | 58.49  | 1343.6106 | 11     | -2.5 | 672.8109  | 2 | 31.19 | 12       | F12:1506 | OB5939 H1 raw.raw | 3.7713E4        | 1        | 1                   | 302   | 312 | Carbamidomethylation (DHKE, X@N-term) | D1:Carbamidomethylation (DHKE, X@N-term):1000.00                                 | PEAKS PTM |
| K.HADADNILVIQ(+.98)QGQATVTVAN(+.98)GNNRK.S       | N    | 58.29  | 2748.3792 | 26     | 4.6  | 1375.2031 | 2 | 31.28 | 12       | F12:1539 | OB5939 H1 raw.raw | 1.8636E5        | 1        | 1                   | 223   | 248 |                                       | Q11:Deamidation (NQ):15.10;N21:Deamidation (NQ):17.01                            | PEAKS DB  |
| K.HADADN(+.98)ILVIQ(+.98)QGQATVTVANGNNRK.S       | N    | 57.75  | 2748.3792 | 26     | 3.1  | 1375.2010 | 2 | 30.08 | 14       | F14:1495 | OB5941 H1 raw.raw | 1.5756E6        | 1        | 1                   | 223   | 248 |                                       | N6:Deamidation (NQ):0.00;Q11:Deamidation (NQ):0.00                               | PEAKS DB  |
| N.PFYFPSRR.F                                     | N    | 57.72  | 1068.5504 | 8      | 3.3  | 535.2842  | 2 | 28.95 | 12       | F12:1360 | OB5939 H1 raw.raw | 3.0845E6        | 3        | 3                   | 168   | 175 |                                       |                                                                                  | PEAKS DB  |
| R.LFEVKPKKPNQLQDLDMM(+15.99)LTC(+57.02)VEIK.E    | N    | 57.62  | 3147.6018 | 26     | -4.4 | 787.9042  | 4 | 32.55 | 14       | F14:1633 | OB5941 H1 raw.raw | 2.1102E6        | 3        | 3                   | 406   | 431 | Carbamidomethylation                  | M19:Oxidation (M):17.01;C22:Carbamidomethylation:1000.00                         | PEAKS DB  |
| K.SFN(+.98)LDEGHALRIPSGFISYILNR.H                | N    | 57.28  | 2619.3445 | 23     | 9.3  | 655.8495  | 4 | 38.22 | 12       | F12:1947 | OB5939 H1 raw.raw | 1.0265E6        | 2        | 2                   | 249   | 271 |                                       | N3:Deamidation (NQ):32.08                                                        | PEAKS DB  |
| K.AMVIVVN(+.98)KGTGNLELVAVRK.E                   | N    | 56.84  | 2210.2820 | 21     | 9.6  | 737.7750  | 3 | 33.10 | 14       | F14:1664 | OB5941 H1 raw.raw | 8.0625E6        | 2        | 2                   | 444   | 464 |                                       | N8:Deamidation (NQ):41.87                                                        | PEAKS DB  |
| K.KNPQLQLDMM(-48.00)LTC(+57.02)VEIK.E            | N    | 56.43  | 2127.0703 | 18     | 0.8  | 710.0312  | 3 | 31.11 | 14       | F14:1538 | OB5941 H1 raw.raw | 3.3192E6        | 2        | 2                   | 414   | 431 | Carbamidomethylation                  | M11:Dethiomethyl:14.02;C14:Carbamidomethylation:1000.00                          | PEAKS PTM |
| K.ISM(+15.99)PVNTPGQFEDFFPASSRDQSSYLQGFSR.N      | N    | 56.19  | 3510.6150 | 31     | 2.9  | 1171.2157 | 3 | 34.90 | 14       | F14:1765 | OB5941 H1 raw.raw | 1.0055E7        | 8        | 8                   | 282   | 312 | Oxidation (M)                         | M3:Oxidation (M):1000.00                                                         | PEAKS DB  |
| V.QIEARPNTLVLPK.H                                | Y    | 55.52  | 1477.8616 | 13     | -3.7 | 739.9353  | 2 | 30.24 | 14       | F14:1485 | OB5941 H1 raw.raw | 9.708E5         | 3        | 3                   | 210   | 222 |                                       |                                                                                  | PEAKS DB  |
| R.N(+57.02)NPFYFPSRR.F                           | N    | 55.47  | 1353.6577 | 10     | -2.6 | 677.8344  | 2 | 29.38 | 14       | F14:1433 | OB5941 H1 raw.raw | 6.1234E5        | 2        | 2                   | 166   | 175 | Carbamidomethylation (DHKE, X@N-term) | N1:Carbamidomethylation (DHKE, X@N-term):1000.00                                 | PEAKS PTM |
| R.SKQFQNLQNHR.I                                  | Y    | 55.18  | 1398.7117 | 11     | 1.0  | 467.2450  | 3 | 24.31 | 13       | F13:1132 | OB5940 H1 raw.raw | 2.6796E4        | 3        | 3                   | 197   | 207 |                                       |                                                                                  | PEAKS DB  |
| K.HADADNILVIQQGQATVTVANGN(+.98)NRK.S             | N    | 55.13  | 2747.3950 | 26     | 4.2  | 687.8589  | 4 | 29.51 | 12       | F12:1401 | OB5939 H1 raw.raw | 2.4633E7        | 5        | 5                   | 223   | 248 |                                       | N23:Deamidation (NQ):17.01                                                       | PEAKS DB  |
| K.HADADNILVIQQ(+.98)GQ(+.98)ATVTVAN(+.98)GNNRK.S | N    | 55.12  | 2749.3630 | 26     | 9.6  | 917.4705  | 3 | 30.18 | 13       | F13:1487 | OB5940 H1 raw.raw | 4.3812E6        | 1        | 1                   | 223   | 248 |                                       | Q12:Deamidation (NQ):14.02;Q14:Deamidation (NQ):13.03;N21:Deamidation (NQ):11.10 | PEAKS DB  |
| K.AM(-48.00)VIVVNVKGTGNLELVAVRK.E                | N    | 54.93  | 2161.2947 | 21     | 1.4  | 1081.6561 | 2 | 29.80 | 14       | F14:1453 | OB5941 H1 raw.raw | 1.7581E6        | 2        | 2                   | 444   | 464 | Dethiomethyl                          | M2:Dethiomethyl:1000.00                                                          | PEAKS PTM |
| total 219 peptides                               |      |        |           |        |      |           |   |       |          |          |                   |                 |          |                     |       |     |                                       |                                                                                  |           |

| Peptide                                                       | Uniq | -10lgP | Mass      | Length | ppm  | m/z       | z | RT    | Fraction | Scan     | Source File       | Area Raw in gel | #Feature | #Feature Raw in gel | Start | End | PTM                                    | AScore                                                                                                      | Found By  |
|---------------------------------------------------------------|------|--------|-----------|--------|------|-----------|---|-------|----------|----------|-------------------|-----------------|----------|---------------------|-------|-----|----------------------------------------|-------------------------------------------------------------------------------------------------------------|-----------|
| R.I(+57.02)VQIEARPNTLVLPK.H                                   | Y    | 54.55  | 1747.0355 | 15     | 3.8  | 874.5283  | 2 | 30.92 | 12       | F12:1489 | OB5939 H1 raw.raw | 3.7453E7        | 4        | 4                   | 208   | 222 | Carbamidomethylation (DHKE, X@N-term)  | I1:Carbamidomethylation (DHKE, X@N-term):97.69                                                              | PEAKS PTM |
| K.NPQLQDLDM(+15.99)MLTC(+57.02)VEIKEGALMLPHFN(+.98)SK.A       | N    | 54.06  | 3388.6174 | 29     | 5.0  | 848.1659  | 4 | 36.17 | 14       | F14:1849 | OB5941 H1 raw.raw | 6.0156E6        | 2        | 2                   | 415   | 443 | Carbamidomethylation; Deamidation (NQ) | M9:Oxidation (M):14.02;C13:Carbamidomethylation:1000.00;N27:Deamidation (NQ):58.23                          | PEAKS DB  |
| K.IRPEGREGGEQEWGTPGSEVREETSR.N                                | Y    | 53.77  | 2870.3542 | 25     | 1.1  | 718.5966  | 4 | 27.49 | 12       | F12:1279 | OB5939 H1 raw.raw | 3.216E6         | 3        | 3                   | 141   | 165 |                                        |                                                                                                             | PEAKS DB  |
| R.IFLAGDKDNVIDQIE(+57.02)KQAK.D                               | N    | 52.99  | 2201.1692 | 19     | -2.0 | 734.7289  | 3 | 31.83 | 13       | F13:1588 | OB5940 H1 raw.raw | 3.3379E6        | 2        | 2                   | 536   | 554 |                                        | E15:Carbamidomethylation (DHKE, X@N-term):12.28                                                             | PEAKS PTM |
| K.NPQLQDLDMMLTC(+57.02)VEIKEGALMLPHFN(+.98)SK.A               | N    | 52.89  | 3372.6226 | 29     | 7.4  | 844.1691  | 4 | 37.85 | 13       | F13:1914 | OB5940 H1 raw.raw | 5.2564E7        | 2        | 2                   | 415   | 443 | Carbamidomethylation; Deamidation (NQ) | C13:Carbamidomethylation:1000.00;N27:Deamidation (NQ):61.84                                                 | PEAKS DB  |
| K.HADADNILVIQQGQ(+.98)ATVTVANGNNRK.S                          | N    | 52.87  | 2747.3950 | 26     | 5.1  | 916.8103  | 3 | 44.47 | 12       | F12:2283 | OB5939 H1 raw.raw | 1.466E5         | 1        | 1                   | 223   | 248 |                                        | Q14:Deamidation (NQ):14.04                                                                                  | PEAKS DB  |
| K.NPQLQDLDM(+15.99)M(+15.99)LTC(+57.02)VEIKEGALMLPHFNSK.A     | N    | 52.70  | 3403.6284 | 29     | -4.3 | 1135.5452 | 3 | 35.63 | 14       | F14:1818 | OB5941 H1 raw.raw | 1.9434E6        | 2        | 2                   | 415   | 443 | Oxidation (M); Carbamidomethylation    | M9:Oxidation (M):49.75;M10:Oxidation (M):51.99;C13:Carbamidomethylation:1000.00                             | PEAKS DB  |
| L.DEGHALR.I                                                   | N    | 52.68  | 796.3828  | 7      | 2.3  | 399.1996  | 2 | 27.87 | 12       | F12:1309 | OB5939 H1 raw.raw | 2.418E4         | 1        | 1                   | 253   | 259 |                                        |                                                                                                             | PEAKS DB  |
| K.DLAFIGSGEQVEK(+57.02)LIK.N                                  | N    | 52.57  | 1786.9464 | 16     | -3.8 | 894.4771  | 2 | 32.91 | 14       | F14:1654 | OB5941 H1 raw.raw | 6.7177E5        | 1        | 1                   | 555   | 570 |                                        | K13:Carbamidomethylation (DHKE, X@N-term):27.96                                                             | PEAKS PTM |
| K.KN(+.98)PQLQDLDM(+15.99)LTC(+57.02)VEIK.E                   | N    | 52.31  | 2192.0527 | 18     | 9.2  | 1097.0437 | 2 | 32.33 | 13       | F13:1621 | OB5940 H1 raw.raw | 8.5775E4        | 1        | 1                   | 414   | 431 | Carbamidomethylation                   | N2:Deamidation (NQ):14.04;M11:Oxidation (M):0.00;C14:Carbamidomethylation:1000.00                           | PEAKS DB  |
| Q.GQATVTVANGNNRK.S                                            | N    | 51.97  | 1428.7433 | 14     | -0.2 | 715.3788  | 2 | 29.02 | 14       | F14:1412 | OB5941 H1 raw.raw | 1.2099E5        | 2        | 2                   | 235   | 248 |                                        |                                                                                                             | PEAKS DB  |
| K.EGALMLPH(+14.02)FNSK.A                                      | N    | 51.73  | 1356.6860 | 12     | 1.3  | 679.3512  | 2 | 30.49 | 14       | F14:1499 | OB5941 H1 raw.raw | 2.5741E4        | 1        | 1                   | 432   | 443 | Methylation(others)                    | H8:Methylation(others):53.53                                                                                | PEAKS PTM |
| K.N(+.98)PQLQ(+.98)DLDMMLTC(+57.02)VEIKEGALM(+15.99)LPHFNSK.A | N    | 51.60  | 3389.6016 | 29     | 9.0  | 848.4153  | 4 | 36.92 | 12       | F12:1868 | OB5939 H1 raw.raw | 2.6873E6        | 1        | 1                   | 415   | 443 | Carbamidomethylation                   | N1:Deamidation (NQ):0.00;Q5:Deamidation (NQ):14.04;C13:Carbamidomethylation:1000.00;M22:Oxidation (M):18.84 | PEAKS DB  |
| total 219 peptides                                            |      |        |           |        |      |           |   |       |          |          |                   |                 |          |                     |       |     |                                        |                                                                                                             |           |



| Peptide                                                       | Uniq | -10lgP | Mass      | Length | ppm  | m/z       | z | RT    | Fraction | Scan     | Source File       | Area Raw in gel | #Feature | #Feature Raw in gel | Start | End | PTM                                 | AScore                                                                                                        | Found By  |
|---------------------------------------------------------------|------|--------|-----------|--------|------|-----------|---|-------|----------|----------|-------------------|-----------------|----------|---------------------|-------|-----|-------------------------------------|---------------------------------------------------------------------------------------------------------------|-----------|
| R.LFEVKPDKK.N                                                 | N    | 50.85  | 1102.6385 | 9      | 1.1  | 552.3271  | 2 | 24.94 | 14       | F14:1179 | OB5941 H1 raw.raw | 2.3081E5        | 2        | 2                   | 406   | 414 |                                     |                                                                                                               | PEAKS DB  |
| R.RVLLEENAGGEQEERGQR.R                                        | N    | 50.67  | 2069.0249 | 18     | 2.1  | 690.6837  | 3 | 24.88 | 13       | F13:1165 | OB5940 H1 raw.raw | 2.7227E5        | 1        | 1                   | 328   | 345 |                                     |                                                                                                               | PEAKS DB  |
| K.N(+.98)PQLQDLDMMLTC(+57.02)VEIKEGALM(+15.99)LPHFNSK.A       | N    | 50.17  | 3388.6174 | 29     | -2.4 | 1130.5437 | 3 | 36.35 | 13       | F13:1874 | OB5940 H1 raw.raw | 8.9006E5        | 1        | 1                   | 415   | 443 | Carbamidomethylation; Oxidation (M) | N1:Deamidation (NQ): 0.00;C13:Carbamidomethylation: 1000.00;M22:Oxidation (M):54.40                           | PEAKS DB  |
| K.NPQLQDLDMM(+15.99)LTC(+57.02)VEIKEGALM(+15.99)LPHFNSK.A     | N    | 48.97  | 3403.6284 | 29     | 2.7  | 1135.5531 | 3 | 35.09 | 14       | F14:1786 | OB5941 H1 raw.raw | 3.2001E5        | 1        | 1                   | 415   | 443 | Carbamidomethylation                | M10:Oxidation (M):12.28;C13:Carbamidomethylation:1000.00;M22:Oxidation (M):28.29                              | PEAKS DB  |
| R.EQEWEEEEEEEEEGSNREVRR.Y                                     | N    | 48.85  | 2821.1545 | 22     | 1.8  | 941.3939  | 3 | 26.75 | 12       | F12:1227 | OB5939 H1 raw.raw | 3.3887E6        | 3        | 3                   | 473   | 494 |                                     |                                                                                                               | PEAKS DB  |
| K.KN(+.98)PQLQDLDMMLTC(+57.02)VEIKEGALMLPHFNSK.A              | N    | 48.84  | 3500.7175 | 30     | 7.1  | 876.1929  | 4 | 36.26 | 13       | F13:1847 | OB5940 H1 raw.raw | 2.2113E6        | 1        | 1                   | 414   | 443 | Carbamidomethylation                | N2:Deamidation (NQ): 0.00;C14:Carbamidomethylation: 1000.00                                                   | PEAKS DB  |
| R.IFLAGDKDNVIDQIEK(+57.02)QAK.D                               | N    | 48.82  | 2201.1692 | 19     | 2.7  | 734.7323  | 3 | 32.55 | 12       | F12:1581 | OB5939 H1 raw.raw | 3.2958E6        | 1        | 1                   | 536   | 554 |                                     | K16:Carbamidomethylation (DHKE, X@N-term):15.91                                                               | PEAKS PTM |
| R.EREEDWRQPR.E                                                | N    | 48.49  | 1399.6592 | 10     | 0.1  | 467.5604  | 3 | 24.77 | 14       | F14:1154 | OB5941 H1 raw.raw | 2.5247E4        | 1        | 1                   | 118   | 127 |                                     |                                                                                                               | PEAKS DB  |
| R.KSFN(+.98)LDEGHALRIPSGFISYILNR.H                            | N    | 47.51  | 2747.4395 | 24     | 4.5  | 687.8702  | 4 | 36.15 | 14       | F14:1837 | OB5941 H1 raw.raw | 1.0524E6        | 1        | 1                   | 248   | 271 |                                     | N4:Deamidation (NQ): 23.98                                                                                    | PEAKS DB  |
| R.LFEVKPDKKN(+.98)PQLQDLDMMLTC(+57.02)VEIK.E                  | N    | 47.32  | 3132.5908 | 26     | 9.3  | 1567.3173 | 2 | 34.35 | 14       | F14:1745 | OB5941 H1 raw.raw | 1.9315E5        | 1        | 1                   | 406   | 431 | Carbamidomethylation                | N10:Deamidation (NQ):14.04;C22:Carbamidomethylation:1000.00                                                   | PEAKS DB  |
| K.N(+.98)PQ(+.98)LQDLDMMLTC(+57.02)VEIKEGALM(+15.99)LPHFNSK.A | N    | 46.82  | 3389.6016 | 29     | 9.0  | 848.4153  | 4 | 36.92 | 12       | F12:1851 | OB5939 H1 raw.raw | 7.3613E6        | 2        | 2                   | 415   | 443 | Carbamidomethylation                | N1:Deamidation (NQ): 11.12;Q3:Deamidation (NQ):0.00;C13:Carbamidomethylation:1000.00;M22:Oxidation (M): 24.93 | PEAKS DB  |
| W.GTPGSEVREETSR.N                                             | Y    | 46.79  | 1403.6641 | 13     | 3.5  | 702.8417  | 2 | 27.60 | 14       | F14:1327 | OB5941 H1 raw.raw | 5.9917E4        | 1        | 1                   | 153   | 165 |                                     |                                                                                                               | PEAKS DB  |
| N.PQLQDLDMMLTC(+57.02)VEIKEGALMLPHFNSK.A                      | N    | 46.63  | 3257.5957 | 28     | 0.9  | 815.4069  | 4 | 37.83 | 14       | F14:1952 | OB5941 H1 raw.raw | 2.3692E5        | 1        | 1                   | 416   | 443 | Carbamidomethylation                | C12:Carbamidomethylation:1000.00                                                                              | PEAKS DB  |
| K.Q(-17.03)AKDLAFPGSGEQVEK.L                                  | N    | 46.49  | 1685.8260 | 16     | 0.9  | 843.9211  | 2 | 29.97 | 12       | F12:1427 | OB5939 H1 raw.raw | 0               | 0        | 0                   | 552   | 567 | Pyro-glu from Q                     | Q1:Pyro-glu from Q:1000.00                                                                                    | PEAKS PTM |
| K.SFN(+.98)LDEGHALRIPSGFISYILNRHDNQNLR.V                      | N    | 46.45  | 3496.7600 | 30     | -3.9 | 700.3566  | 5 | 36.38 | 12       | F12:1849 | OB5939 H1 raw.raw | 6.986E5         | 1        | 1                   | 249   | 278 |                                     | N3:Deamidation (NQ): 20.27                                                                                    | PEAKS DB  |
| total 219 peptides                                            |      |        |           |        |      |           |   |       |          |          |                   |                 |          |                     |       |     |                                     |                                                                                                               |           |

| Peptide                                          | Uniq | -10lgP | Mass      | Length | ppm  | m/z       | z | RT    | Fraction | Scan     | Source File        | Area Raw in gel | #Feature | #Feature Raw in gel | Start | End | PTM                                   | AScore                                                        | Found By  |
|--------------------------------------------------|------|--------|-----------|--------|------|-----------|---|-------|----------|----------|--------------------|-----------------|----------|---------------------|-------|-----|---------------------------------------|---------------------------------------------------------------|-----------|
| R.REQ(+.98)EWEEEEEEEEEESNR.E                     | N    | 45.55  | 2437.9265 | 19     | 7.6  | 813.6556  | 3 | 26.55 | 12       | F12:1226 | OB5939 H1 raw.raw  | 4.2319E4        | 1        | 1                   | 472   | 490 |                                       | Q3:Deamidation (NQ): 42.90                                    | PEAKS DB  |
| T.PGQFEDFFPASSR.D                                | N    | 45.25  | 1483.6731 | 13     | -1.3 | 742.8429  | 2 | 40.34 | 13       | F13:2103 | OB5940 H1 raw.raw  | 4.0298E3        | 1        | 1                   | 289   | 301 |                                       |                                                               | PEAKS DB  |
| R.IPSGFISYILN(+.98)RHDNQNL.R.V                   | N    | 45.21  | 2257.1604 | 19     | 9.9  | 753.4015  | 3 | 37.61 | 2        | F2:1698  | OB5925 H3B raw.raw | 2.0603E6        | 2        | 2                   | 260   | 278 |                                       | N11:Deamidation (NQ): 33.06                                   | PEAKS DB  |
| T.PGSEVREETSR.N                                  | Y    | 45.10  | 1245.5948 | 11     | 1.9  | 623.8059  | 2 | 27.69 | 12       | F12:1287 | OB5939 H1 raw.raw  | 4.1909E4        | 1        | 1                   | 155   | 165 |                                       |                                                               | PEAKS DB  |
| N.NPFYFPSRR.F                                    | N    | 45.02  | 1182.5934 | 9      | 1.6  | 395.2057  | 3 | 28.08 | 13       | F13:1358 | OB5940 H1 raw.raw  | 2.9991E4        | 1        | 1                   | 167   | 175 |                                       |                                                               | PEAKS DB  |
| R.DQS(-18.01)SYLQGF.SR.N                         | N    | 44.90  | 1268.5785 | 11     | 7.0  | 635.3010  | 2 | 30.87 | 12       | F12:1484 | OB5939 H1 raw.raw  | 0               | 0        | 0                   | 302   | 312 |                                       | S3:Dehydration: 33.98                                         | PEAKS PTM |
| K.GTGNLELVAVRKEQQR.G                             | N    | 44.58  | 1925.0442 | 17     | 0.6  | 642.6890  | 3 | 25.89 | 14       | F14:1220 | OB5941 H1 raw.raw  | 1.1112E5        | 2        | 2                   | 453   | 469 |                                       |                                                               | PEAKS DB  |
| R.EDWRRPSHQQR.K                                  | N    | 43.98  | 1590.7764 | 12     | -0.3 | 398.7012  | 4 | 24.94 | 14       | F14:1169 | OB5941 H1 raw.raw  | 1.0819E4        | 1        | 1                   | 128   | 139 |                                       |                                                               | PEAKS DB  |
| R.IVQIEARPNTLVLPK(+57.02).H                      | Y    | 43.35  | 1747.0355 | 15     | -2.4 | 874.5229  | 2 | 30.35 | 13       | F13:1460 | OB5940 H1 raw.raw  | 8.446E6         | 1        | 1                   | 208   | 222 | Carbamidomethylation (DHKE, X@N-term) | K15:Carbamidomethylation (DHKE, X@N-term): 110.46             | PEAKS PTM |
| R.VLLE(+21.98)ENAGGEQEER.G                       | N    | 42.61  | 1593.7246 | 14     | -0.7 | 797.8690  | 2 | 26.03 | 13       | F13:1239 | OB5940 H1 raw.raw  | 1.373E5         | 3        | 3                   | 329   | 342 |                                       | E4:Sodium adduct: 40.00                                       | PEAKS PTM |
| K.HADADN.LVIQ(+.98)QGQATVTVANGNNRK.S             | N    | 42.22  | 2747.3950 | 26     | 5.9  | 916.8110  | 3 | 45.04 | 14       | F14:2357 | OB5941 H1 raw.raw  | 0               | 0        | 0                   | 223   | 248 |                                       | Q11:Deamidation (NQ): 9.34                                    | PEAKS DB  |
| K.IRPEGREGQE.WGT.PGSEVR.E                        | Y    | 42.02  | 2268.0881 | 20     | 1.1  | 757.0375  | 3 | 26.28 | 14       | F14:1248 | OB5941 H1 raw.raw  | 5.4096E4        | 1        | 1                   | 141   | 160 |                                       |                                                               | PEAKS DB  |
| K.HADADN.LVIQ.QGQAT(-18.01)VTVAN(+.98)GNNRK.S    | N    | 41.92  | 2729.3845 | 26     | 0.3  | 683.3536  | 4 | 28.96 | 13       | F13:1411 | OB5940 H1 raw.raw  | 3.5545E5        | 1        | 1                   | 223   | 248 |                                       | T16:Dehydration: 8.22; N21:Deamidation (NQ): 6.08             | PEAKS PTM |
| K.HADADN(+.98)ILVIQ.QGQATVTVANGNNRK.S            | N    | 41.76  | 2747.3950 | 26     | 3.7  | 916.8090  | 3 | 50.62 | 12       | F12:2616 | OB5939 H1 raw.raw  | 1.1355E5        | 2        | 2                   | 223   | 248 |                                       | N6:Deamidation (NQ): 42.57                                    | PEAKS DB  |
| K.ISMPVN(+.98)TPGQFEDFFPASSR.D                   | N    | 41.75  | 2227.0254 | 20     | 9.3  | 1114.5303 | 2 | 58.23 | 14       | F14:3138 | OB5941 H1 raw.raw  | 2.4983E4        | 1        | 1                   | 282   | 301 |                                       | N6:Deamidation (NQ): 42.89                                    | PEAKS DB  |
| M.LPHFNSK.A                                      | N    | 41.73  | 841.4446  | 7      | -3.4 | 421.7281  | 2 | 30.24 | 14       | F14:1484 | OB5941 H1 raw.raw  | 1.8069E6        | 2        | 2                   | 437   | 443 |                                       |                                                               | PEAKS DB  |
| R.PNTLVLPK.H                                     | N    | 41.66  | 880.5382  | 8      | 0.4  | 441.2766  | 2 | 27.53 | 13       | F13:1313 | OB5940 H1 raw.raw  | 8.5249E4        | 1        | 1                   | 215   | 222 |                                       |                                                               | PEAKS DB  |
| N.TLEAAFN.AEFNEIRR.V                             | N    | 41.51  | 1779.8904 | 15     | -3.0 | 890.9498  | 2 | 32.91 | 14       | F14:1655 | OB5941 H1 raw.raw  | 4.1608E5        | 1        | 1                   | 314   | 328 |                                       |                                                               | PEAKS DB  |
| K.KGSEEDITN(-17.03)PINLR.D                       | N    | 41.49  | 1696.8268 | 15     | 3.3  | 566.6180  | 3 | 28.85 | 14       | F14:1397 | OB5941 H1 raw.raw  | 2.3089E5        | 1        | 1                   | 379   | 393 |                                       | N10:Ammonia-loss (N): 40.63                                   | PEAKS PTM |
| K.KNPQLQ(+.98)DLDMMLTC(+57.02)VEIKEGALMLPHFNSK.A | N    | 40.89  | 3500.7175 | 30     | 0.4  | 1167.9136 | 3 | 36.34 | 13       | F13:1850 | OB5940 H1 raw.raw  | 4.7608E5        | 1        | 1                   | 414   | 443 | Carbamidomethylation                  | Q6:Deamidation (NQ): 14.04; C14:Carbamidomethylation: 1000.00 | PEAKS DB  |
| R.REQEWEEEEEEEEGSNREVR.R                         | N    | 40.76  | 2821.1545 | 22     | 3.9  | 941.3958  | 3 | 26.47 | 14       | F14:1247 | OB5941 H1 raw.raw  | 1.8468E6        | 1        | 1                   | 472   | 493 |                                       |                                                               | PEAKS DB  |
| total 219 peptides                               |      |        |           |        |      |           |   |       |          |          |                    |                 |          |                     |       |     |                                       |                                                               |           |

| Peptide                                         | Uniq | -10lgP | Mass      | Length | ppm  | m/z       | z | RT    | Fraction | Scan     | Source File       | Area Raw in gel | #Feature | #Feature Raw in gel | Start | End | PTM                                 | AScore                                                                                | Found By  |
|-------------------------------------------------|------|--------|-----------|--------|------|-----------|---|-------|----------|----------|-------------------|-----------------|----------|---------------------|-------|-----|-------------------------------------|---------------------------------------------------------------------------------------|-----------|
| R.NTLEAAFN(+.98)AEFNEIRR.V                      | N    | 40.23  | 1894.9172 | 16     | -0.3 | 948.4656  | 2 | 32.92 | 12       | F12:1570 | OB5939 H1 raw.raw | 1.5322E6        | 1        | 1                   | 313   | 328 |                                     | N8:Deamidation (NQ): 8.26                                                             | PEAKS DB  |
| K.NPQLQDLDM(+15.99)M(+15.99)LTC(+57.02)VEIK.E   | N    | 39.57  | 2078.9688 | 17     | 1.1  | 1040.4928 | 2 | 33.80 | 14       | F14:1701 | OB5941 H1 raw.raw | 0               | 0        | 0                   | 415   | 431 | Oxidation (M); Carbamidomethylation | M9:Oxidation (M):100.0.00;M10:Oxidation (M):1000.00;C13:Carbamidomethylation:100.0.00 | PEAKS DB  |
| R.IPS(+59.02)GFISYILNR.H                        | N    | 39.40  | 1437.7802 | 12     | 1.5  | 719.8984  | 2 | 36.96 | 12       | F12:1870 | OB5939 H1 raw.raw | 4.3694E5        | 1        | 1                   | 260   | 271 |                                     | S3:Aminoethylcysteine:49.79                                                           | PEAKS PTM |
| K.HADADNILVIQQ(-18.01).G                        | N    | 38.68  | 1317.6677 | 12     | -4.9 | 659.8379  | 2 | 29.56 | 14       | F14:1421 | OB5941 H1 raw.raw | 1.6968E5        | 2        | 2                   | 223   | 234 | Dehydration                         | Q12:Dehydration:76.18                                                                 | PEAKS PTM |
| K.AMVIVVVK(-1.03)GTGNLELVAVR.K                  | N    | 37.92  | 2080.1714 | 20     | 4.3  | 1041.0974 | 2 | 33.79 | 13       | F13:1738 | OB5940 H1 raw.raw | 2.1453E7        | 1        | 1                   | 444   | 463 | Lysine oxidation to aminoaldehyde   | K9:Lysine oxidation to aminoaldehyde:1000.00                                          | PEAKS PTM |
| I.PSGFISYILNRHDNQNL.R                           | N    | 37.07  | 2143.0923 | 18     | 4.0  | 715.3742  | 3 | 33.53 | 12       | F12:1645 | OB5939 H1 raw.raw | 0               | 0        | 0                   | 261   | 278 |                                     |                                                                                       | PEAKS DB  |
| K.EGALM(-48.00)LPHFNSK.A                        | N    | 36.97  | 1294.6670 | 12     | 2.0  | 432.5638  | 3 | 28.31 | 14       | F14:1348 | OB5941 H1 raw.raw | 1.3683E6        | 1        | 1                   | 432   | 443 | Dethiomethyl                        | M5:Dethiomethyl:100.0.00                                                              | PEAKS PTM |
| R.IFLAGDKDNVIDQ(+.98)IEK.Q                      | N    | 36.27  | 1817.9410 | 16     | 7.9  | 606.9924  | 3 | 63.32 | 14       | F14:3434 | OB5941 H1 raw.raw | 1.3413E4        | 1        | 1                   | 536   | 551 |                                     | Q13:Deamidation (NQ):25.70                                                            | PEAKS DB  |
| K.HAD(+57.02)ADNILVIQQGQATVTVANGN(+.98)NRK.S    | N    | 35.92  | 2804.4165 | 26     | -3.8 | 702.1088  | 4 | 28.95 | 13       | F13:1413 | OB5940 H1 raw.raw | 2.7833E5        | 1        | 1                   | 223   | 248 |                                     | D3:Carbamidomethylation (DHKE, X@N-term):4.64;N23:Deamidation (NQ):0.00               | PEAKS PTM |
| K.NPQ(+.98)LQDLMMMLTC(+57.02)VEIKEGALMLPHFNSK.A | N    | 35.84  | 3372.6226 | 29     | 9.4  | 1125.2253 | 3 | 40.73 | 12       | F12:2064 | OB5939 H1 raw.raw | 5.6313E5        | 1        | 1                   | 415   | 443 | Carbamidomethylation                | Q3:Deamidation (NQ):0.00;C13:Carbamidomethylation:1000.00                             | PEAKS DB  |
| K.ISM(+15.99)PVNTPGQ(+.98)FEDFFPASSR.D          | N    | 35.67  | 2243.0205 | 20     | 6.2  | 1122.5245 | 2 | 50.73 | 12       | F12:2643 | OB5939 H1 raw.raw | 0               | 0        | 0                   | 282   | 301 | Oxidation (M)                       | M3:Oxidation (M):100.0.00;Q10:Deamidation (NQ):22.37                                  | PEAKS DB  |
| K.GT(-18.01)GNLELVAVRK.E                        | N    | 35.64  | 1237.7142 | 12     | 0.9  | 413.5790  | 3 | 26.41 | 13       | F13:1259 | OB5940 H1 raw.raw | 7.4255E5        | 3        | 3                   | 453   | 464 | Dehydration                         | T2:Dehydration:1000.00                                                                | PEAKS PTM |
| K.SFNLDEGHALRIPS.G                              | N    | 35.38  | 1554.7791 | 14     | -4.8 | 778.3931  | 2 | 30.79 | 13       | F13:1515 | OB5940 H1 raw.raw | 5.2113E3        | 1        | 1                   | 249   | 262 |                                     |                                                                                       | PEAKS DB  |
| R.DQ(+.98)SSYLQGFSSR.N                          | N    | 34.61  | 1287.5731 | 11     | -3.2 | 644.7917  | 2 | 63.83 | 14       | F14:3449 | OB5941 H1 raw.raw | 0               | 0        | 0                   | 302   | 312 |                                     | Q2:Deamidation (NQ):41.87                                                             | PEAKS DB  |
| R.S(+57.02)SDNEGVIVK.V                          | N    | 34.54  | 1103.5459 | 10     | 0.3  | 552.7804  | 2 | 23.19 | 13       | F13:1066 | OB5940 H1 raw.raw | 0               | 0        | 0                   | 351   | 360 |                                     | S1:Carbamidomethylation (DHKE, X@N-term):11.10                                        | PEAKS PTM |
| Q.IEARPNTLVLPK.H                                | Y    | 34.19  | 1349.8030 | 12     | 2.2  | 675.9103  | 2 | 30.40 | 12       | F12:1461 | OB5939 H1 raw.raw | 1.011E6         | 3        | 3                   | 211   | 222 |                                     |                                                                                       | PEAKS DB  |
| R.NN(-17.03)PFYFSSRR.F                          | N    | 34.10  | 1279.6097 | 10     | -0.4 | 427.5437  | 3 | 28.25 | 13       | F13:1369 | OB5940 H1 raw.raw | 1.47E5          | 1        | 1                   | 166   | 175 |                                     | N2:Ammonia-loss (N):12.28                                                             | PEAKS PTM |
| total 219 peptides                              |      |        |           |        |      |           |   |       |          |          |                   |                 |          |                     |       |     |                                     |                                                                                       |           |

| Peptide                                                              | Uniq | -10lgP | Mass      | Length | ppm  | m/z       | z | RT    | Fraction | Scan     | Source File       | Area Raw in gel | #Feature | #Feature Raw in gel | Start | End | PTM                                    | AScore                                                                                                                                      | Found By  |
|----------------------------------------------------------------------|------|--------|-----------|--------|------|-----------|---|-------|----------|----------|-------------------|-----------------|----------|---------------------|-------|-----|----------------------------------------|---------------------------------------------------------------------------------------------------------------------------------------------|-----------|
| T.G(+214.97)NLELVAVRK.E                                              | N    | 33.47  | 1312.6267 | 10     | 2.3  | 657.3221  | 2 | 27.95 | 14       | F14:1280 | OB5941 H1 raw.raw | 2.4669E5        | 1        | 1                   | 455   | 464 | 4-sulfophenyl isothiocyanate           | G1:4-sulfophenyl isothiocyanate:144.45                                                                                                      | PEAKS PTM |
| K.HADADNILVIQQ(+.98)GQATVTVANGNN(+.98)RK.S                           | N    | 33.28  | 2748.3792 | 26     | 7.6  | 917.1406  | 3 | 48.20 | 12       | F12:2471 | OB5939 H1 raw.raw | 2.0672E4        | 1        | 1                   | 223   | 248 |                                        | Q12:Deamidation (N Q):23.10;N 24:Deamidation (NQ):0.00                                                                                      | PEAKS DB  |
| K.HADAD(-18.01)NILVIQQGQATVTVANGNNRK.S                               | N    | 33.25  | 2728.4004 | 26     | 3.5  | 910.4772  | 3 | 28.70 | 13       | F13:1390 | OB5940 H1 raw.raw | 0               | 0        | 0                   | 223   | 248 |                                        | D5:Dehydration:30.36                                                                                                                        | PEAKS PTM |
| K.ISM(+15.99)PVN(+.98)TPGQFEDFFPASSR.D                               | N    | 33.05  | 2243.0205 | 20     | 7.6  | 1122.5260 | 2 | 49.72 | 13       | F13:2625 | OB5940 H1 raw.raw | 0               | 0        | 0                   | 282   | 301 | Oxidation (M)                          | M3:Oxidation (M):100 0.00;N6:Deamidation (NQ):25.70                                                                                         | PEAKS DB  |
| R.IFLAGDK(+26.02)DNVIDQIEK.Q                                         | N    | 32.97  | 1842.9727 | 16     | -0.2 | 922.4934  | 2 | 35.63 | 14       | F14:1844 | OB5941 H1 raw.raw | 1.4466E5        | 1        | 1                   | 536   | 551 | Acetaldehyde +26                       | K7:Acetaldehyde +26:74.34                                                                                                                   | PEAKS PTM |
| K.NPQLQ(+.98)DLDMM(+15.99)LTC(+57.02)VEIK.E                          | N    | 32.85  | 2063.9578 | 17     | -3.4 | 1032.9827 | 2 | 37.19 | 12       | F12:1881 | OB5939 H1 raw.raw | 2.2954E4        | 1        | 1                   | 415   | 431 | Carbamidomethylation                   | Q5:Deamidation (NQ):26.31;M10:Oxidation (M):0.00;C 13:Carbamidomethylation:1000.00                                                          | PEAKS DB  |
| K.HADADNILVIQ(+.98)QGQ(+.98)ATVTVANGNNRK.S                           | N    | 32.62  | 2748.3792 | 26     | 3.1  | 917.1365  | 3 | 57.24 | 13       | F13:3064 | OB5940 H1 raw.raw | 0               | 0        | 0                   | 223   | 248 |                                        | Q11:Deamidation (N Q):0.00;Q1 4:Deamidation (NQ):0.00                                                                                       | PEAKS DB  |
| K.N(+.98)PQ(+.98)LQ(+.98)DLDMM(+15.99)LTC(+57.02)VEIKEGALMLPHFNSK.A  | N    | 32.23  | 3390.5854 | 29     | 3.7  | 848.6568  | 4 | 38.47 | 14       | F14:1982 | OB5941 H1 raw.raw | 0               | 0        | 0                   | 415   | 443 | Deamidation (NQ); Carbamidomethylation | N1:Deamidation (NQ):62.42;Q3:Deamidation (NQ):65.9 2;Q5:Deamidation (N Q):60.92;M 10:Oxidation (M):12.2 8;C13:Carbamidomethylation:100 0.00 | PEAKS DB  |
| R.EGEQEWGT(-18.01)PGSEVREETSR.N                                      | Y    | 32.15  | 2143.9407 | 19     | 2.2  | 1072.9800 | 2 | 27.69 | 12       | F12:1293 | OB5939 H1 raw.raw | 4.1679E4        | 1        | 1                   | 147   | 165 |                                        | T8:Dehydration:20.70                                                                                                                        | PEAKS PTM |
| K.KN(+.98)PQ(+.98)LQ(+.98)DLDM(+15.99)MLTC(+57.02)VEIKEGALMLPHFNSK.A | N    | 31.81  | 3518.6804 | 30     | -3.0 | 880.6747  | 4 | 37.45 | 12       | F12:1882 | OB5939 H1 raw.raw | 0               | 0        | 0                   | 414   | 443 | Deamidation (NQ); Carbamidomethylation | N2:Deamidation (NQ):58.75;Q4:Deamidation (NQ):61.6 5;Q6:Deamidation (N Q):53.75;M 10:Oxidation (M):0.00; C14:Carbamidomethylation:1000.00   | PEAKS DB  |
| total 219 peptides                                                   |      |        |           |        |      |           |   |       |          |          |                   |                 |          |                     |       |     |                                        |                                                                                                                                             |           |

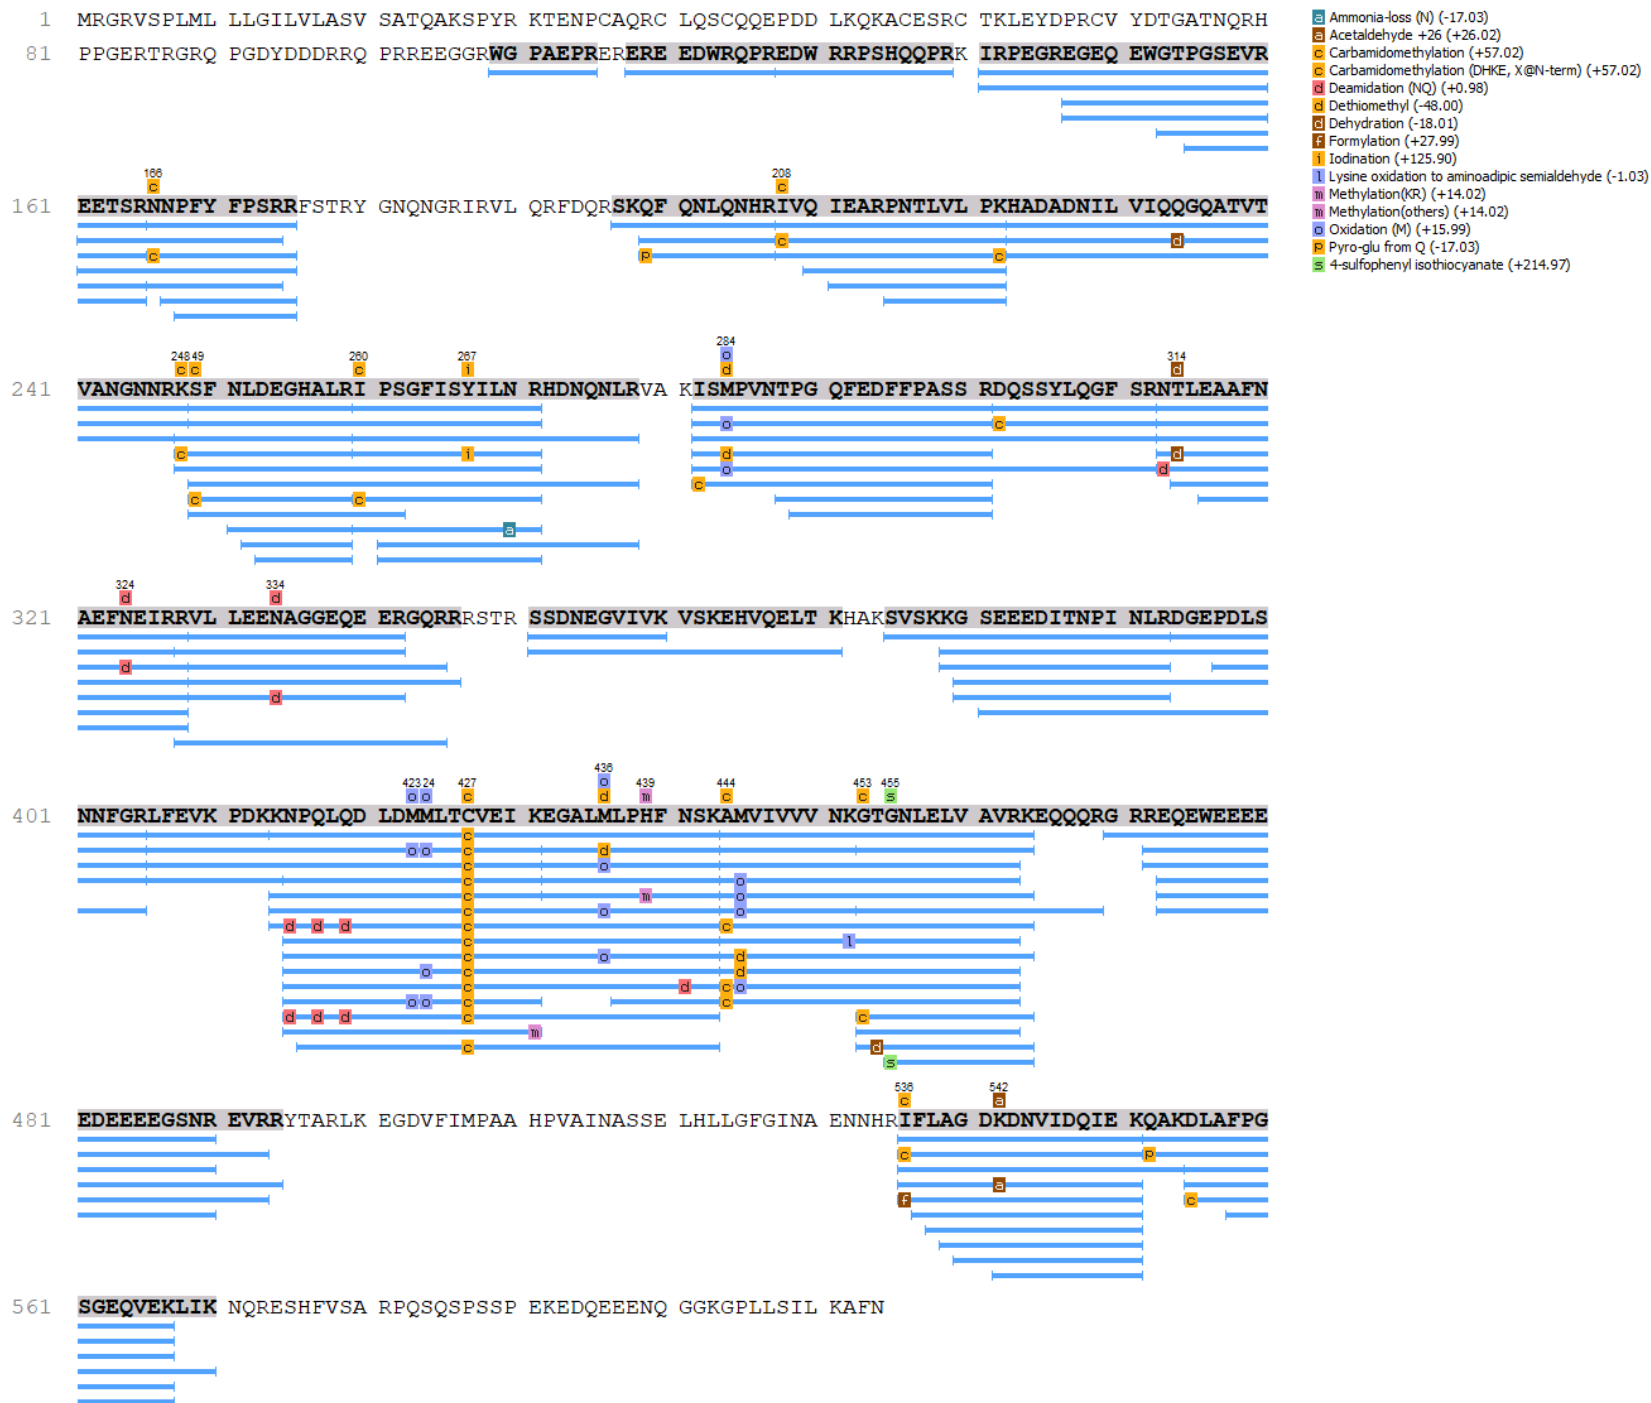

Supporting Peptides:

| Peptide                                  | Uniq | -10lgP | Mass      | Length | ppm  | m/z       | z | RT    | Fraction | Scan     | Source File        | Area Raw in gel | #Feature | #Feature Raw in gel | Start | End | PTM                  | AScore                                                   | Found By |
|------------------------------------------|------|--------|-----------|--------|------|-----------|---|-------|----------|----------|--------------------|-----------------|----------|---------------------|-------|-----|----------------------|----------------------------------------------------------|----------|
| K.HADADNILVIQQGQATVTVAN(+.98)GNNRK.S     | N    | 140.09 | 2747.3950 | 26     | -1.1 | 916.8046  | 3 | 29.38 | 14       | F14:1509 | OB5941 H1 raw.raw  | 3.7837E8        | 20       | 20                  | 223   | 248 |                      | N21:Deamidation (N Q):26.31                              | PEAKS DB |
| K.KNPQLQDLDMMLTC(+57.02)VEIK.E           | N    | 137.14 | 2175.0737 | 18     | 2.4  | 1088.5468 | 2 | 34.90 | 14       | F14:1774 | OB5941 H1 raw.raw  | 4.1086E6        | 3        | 3                   | 414   | 431 | Carbamidomethylation | C14:Carbamidomethylation:1000.00                         | PEAKS DB |
| K.HADADNILVIQQGQATVTVANGNNR.K            | N    | 135.84 | 2618.3162 | 25     | 2.9  | 1310.1692 | 2 | 30.42 | 14       | F14:1494 | OB5941 H1 raw.raw  | 5.8142E6        | 3        | 3                   | 223   | 247 |                      |                                                          | PEAKS DB |
| K.ISMPVNTPGQFEDFFPASSR.D                 | N    | 135.58 | 2226.0415 | 20     | 1.9  | 1114.0302 | 2 | 35.63 | 14       | F14:1807 | OB5941 H1 raw.raw  | 2.1661E8        | 32       | 26                  | 282   | 301 |                      |                                                          | PEAKS DB |
| K.ISM(+15.99)PVNTPGQFEDFFPASSR.D         | N    | 134.77 | 2242.0364 | 20     | 2.3  | 1122.0281 | 2 | 34.42 | 2        | F2:1522  | OB5925 H3B raw.raw | 1.6845E7        | 19       | 17                  | 282   | 301 | Oxidation (M)        | M3:Oxidation (M):100 0.00                                | PEAKS DB |
| K.NPQLQDLDMMLTC(+57.02)VEIK.E            | N    | 131.65 | 2046.9788 | 17     | -0.8 | 1024.4958 | 2 | 36.89 | 14       | F14:1903 | OB5941 H1 raw.raw  | 1.2559E7        | 8        | 8                   | 415   | 431 | Carbamidomethylation | C13:Carbamidomethylation:1000.00                         | PEAKS DB |
| R.EQEWEHEEEEEEGSNR.E                     | N    | 130.87 | 2280.8413 | 18     | 4.3  | 1141.4329 | 2 | 28.13 | 14       | F14:1352 | OB5941 H1 raw.raw  | 4.0373E6        | 3        | 3                   | 473   | 490 |                      |                                                          | PEAKS DB |
| K.NPQLQDLDM(+15.99)MLTC(+57.02)VEIK.E    | N    | 128.59 | 2062.9736 | 17     | -6.6 | 1032.4873 | 2 | 36.34 | 14       | F14:1860 | OB5941 H1 raw.raw  | 2.4371E5        | 2        | 2                   | 415   | 431 | Carbamidomethylation | M9:Oxidation (M):30.46;C13:Carbamidomethylation:10 00.00 | PEAKS DB |
| R.NTLEAAFNAEFNEIR.R                      | N    | 126.11 | 1737.8322 | 15     | 3.3  | 869.9262  | 2 | 35.27 | 14       | F14:1792 | OB5941 H1 raw.raw  | 1.3691E7        | 6        | 6                   | 313   | 327 |                      |                                                          | PEAKS DB |
| K.HADADNILVIQQGQATVTVANGNNRK.S           | N    | 120.98 | 2746.4111 | 26     | 4.7  | 1374.2192 | 2 | 29.02 | 14       | F14:1406 | OB5941 H1 raw.raw  | 4.4412E7        | 13       | 13                  | 223   | 248 |                      |                                                          | PEAKS DB |
| K.SFNLDEGHALRIPSGFISYILNR.H              | N    | 117.92 | 2618.3604 | 23     | 0.6  | 1310.1882 | 2 | 36.89 | 14       | F14:1902 | OB5941 H1 raw.raw  | 2.1092E8        | 40       | 39                  | 249   | 271 |                      |                                                          | PEAKS DB |
| R.VLLEENAGGEQEER.G                       | N    | 114.70 | 1571.7427 | 14     | 1.1  | 786.8795  | 2 | 26.65 | 14       | F14:1250 | OB5941 H1 raw.raw  | 1.2337E7        | 7        | 7                   | 329   | 342 |                      |                                                          | PEAKS DB |
| R.IFLAGDKDNVIDQIEKQAK.D                  | N    | 113.07 | 2144.1477 | 19     | 1.1  | 715.7240  | 3 | 32.93 | 7        | F7:1578  | OB5934 H3B raw.raw | 5.566E7         | 12       | 12                  | 536   | 554 |                      |                                                          | PEAKS DB |
| K.AMVIVVVKGTGNLELVAVR.K                  | N    | 112.17 | 2081.2031 | 20     | 1.5  | 694.7427  | 3 | 34.35 | 14       | F14:1739 | OB5941 H1 raw.raw  | 7.0931E7        | 12       | 12                  | 444   | 463 |                      |                                                          | PEAKS DB |
| R.KSFNLDEGHALR.I                         | N    | 112.03 | 1385.7051 | 12     | 1.1  | 693.8606  | 2 | 25.70 | 14       | F14:1202 | OB5941 H1 raw.raw  | 3.2948E6        | 6        | 6                   | 248   | 259 |                      |                                                          | PEAKS DB |
| R.IPSGFISYILNR.H                         | N    | 111.89 | 1378.7609 | 12     | 1.5  | 690.3887  | 2 | 43.03 | 14       | F14:2242 | OB5941 H1 raw.raw  | 2.1426E8        | 15       | 15                  | 260   | 271 |                      |                                                          | PEAKS DB |
| R.DQSSYLQGFSR.N                          | N    | 110.94 | 1286.5891 | 11     | -1.4 | 644.3009  | 2 | 30.60 | 14       | F14:1505 | OB5941 H1 raw.raw  | 6.2405E7        | 21       | 21                  | 302   | 312 |                      |                                                          | PEAKS DB |
| K.KGSEEDITNPINLR.D                       | N    | 110.67 | 1713.8533 | 15     | 3.2  | 857.9366  | 2 | 28.85 | 14       | F14:1395 | OB5941 H1 raw.raw  | 1.2495E7        | 8        | 8                   | 379   | 393 |                      |                                                          | PEAKS DB |
| K.NPQLQDLDMMLTC(+57.02)VEIKEGALMLPHFSK.A | N    | 110.02 | 3371.6387 | 29     | -0.1 | 1686.8264 | 2 | 37.85 | 14       | F14:1946 | OB5941 H1 raw.raw  | 1.7936E8        | 14       | 14                  | 415   | 443 | Carbamidomethylation | C13:Carbamidomethylation:1000.00                         | PEAKS DB |
| K.AMVIVVVKGTGNLELVAVRK.E                 | N    | 109.98 | 2209.2981 | 21     | -1.4 | 1105.6548 | 2 | 32.55 | 14       | F14:1615 | OB5941 H1 raw.raw  | 2.9136E8        | 18       | 18                  | 444   | 464 |                      |                                                          | PEAKS DB |
| total 219 peptides                       |      |        |           |        |      |           |   |       |          |          |                    |                 |          |                     |       |     |                      |                                                          |          |

| Peptide                                                 | Uniq | -10lgP | Mass      | Length | ppm  | m/z       | z | RT    | Fraction | Scan     | Source File             | Area Raw in gel | #Feature | #Feature Raw in gel | Start | End | PTM                                   | AScore                                           | Found By  |
|---------------------------------------------------------|------|--------|-----------|--------|------|-----------|---|-------|----------|----------|-------------------------|-----------------|----------|---------------------|-------|-----|---------------------------------------|--------------------------------------------------|-----------|
| K.AM(+15.99)VIVVVNKG <sup>T</sup> GNLELVAVR.K           | N    | 109.59 | 2097.1980 | 20     | -2.2 | 1049.6040 | 2 | 32.73 | 14       | F14:1638 | OB5941<br>H1<br>raw.raw | 3.1537E7        | 10       | 10                  | 444   | 463 | Oxidation (M)                         | M2:Oxidation (M):100.0.00                        | PEAKS DB  |
| K.SFNLDEGHALR.I                                         | N    | 109.41 | 1257.6101 | 11     | -3.3 | 629.8102  | 2 | 27.77 | 14       | F14:1329 | OB5941<br>H1<br>raw.raw | 7.2473E7        | 30       | 30                  | 249   | 259 |                                       |                                                  | PEAKS DB  |
| R.IFLAGDKDNVIDQIEK.Q                                    | N    | 108.13 | 1816.9570 | 16     | 0.2  | 909.4860  | 2 | 33.10 | 14       | F14:1683 | OB5941<br>H1<br>raw.raw | 7.2865E8        | 41       | 41                  | 536   | 551 |                                       |                                                  | PEAKS DB  |
| R.KSFNLDEGHALRIPSGFISYILNR.H                            | N    | 107.80 | 2746.4553 | 24     | -2.1 | 916.4905  | 3 | 36.16 | 12       | F12:1802 | OB5939<br>H1<br>raw.raw | 7.186E6         | 4        | 4                   | 248   | 271 |                                       |                                                  | PEAKS DB  |
| K.GSEEDITNPINLRDGE <sup>P</sup> DL <sup>S</sup> NNFGR.L | N    | 107.18 | 2887.3220 | 26     | -1.7 | 963.4464  | 3 | 32.55 | 14       | F14:1626 | OB5941<br>H1<br>raw.raw | 4.5198E7        | 9        | 9                   | 380   | 405 |                                       |                                                  | PEAKS DB  |
| R.EGEQEWGTPGSEVR.E                                      | Y    | 105.02 | 1559.6852 | 14     | -4.9 | 780.8460  | 2 | 27.77 | 14       | F14:1333 | OB5941<br>H1<br>raw.raw | 7.2805E5        | 3        | 3                   | 147   | 160 |                                       |                                                  | PEAKS DB  |
| R.I(+57.02)PSGFISYILNR.H                                | N    | 104.65 | 1435.7823 | 12     | -1.7 | 718.8972  | 2 | 36.52 | 14       | F14:1869 | OB5941<br>H1<br>raw.raw | 1.3017E7        | 3        | 3                   | 260   | 271 | Carbamidomethylation (DHKE, X@N-term) | I1:Carbamidomethylation (DHKE, X@N-term):1000.00 | PEAKS PTM |
| R.VLLEENAGGEQEERGQR.R                                   | N    | 104.46 | 1912.9238 | 17     | 1.8  | 957.4709  | 2 | 25.31 | 14       | F14:1182 | OB5941<br>H1<br>raw.raw | 1.9161E6        | 8        | 8                   | 329   | 345 |                                       |                                                  | PEAKS DB  |
| R.I(+57.02)FLAGDKDNVIDQIEK.Q                            | N    | 103.96 | 1873.9785 | 16     | -5.0 | 937.9919  | 2 | 32.19 | 14       | F14:1619 | OB5941<br>H1<br>raw.raw | 4.5184E7        | 7        | 7                   | 536   | 551 | Carbamidomethylation (DHKE, X@N-term) | I1:Carbamidomethylation (DHKE, X@N-term):90.91   | PEAKS PTM |
| R.DGE <sup>P</sup> DL <sup>S</sup> NNFGR.L              | N    | 102.95 | 1319.5742 | 12     | 0.8  | 660.7949  | 2 | 29.02 | 14       | F14:1398 | OB5941<br>H1<br>raw.raw | 3.2103E6        | 3        | 3                   | 394   | 405 |                                       |                                                  | PEAKS DB  |
| K.QAKDLAFPGSGEQVEK.L                                    | N    | 102.73 | 1702.8525 | 16     | 1.8  | 852.4351  | 2 | 26.85 | 14       | F14:1278 | OB5941<br>H1<br>raw.raw | 1.286E6         | 6        | 6                   | 552   | 567 |                                       |                                                  | PEAKS DB  |
| K.H(+57.02)ADADNILVIQGGQATVTVANGNNRK.S                  | N    | 102.10 | 2803.4324 | 26     | -1.3 | 935.4835  | 3 | 29.92 | 14       | F14:1452 | OB5941<br>H1<br>raw.raw | 1.6897E6        | 1        | 1                   | 223   | 248 |                                       | H1:Carbamidomethylation (DHKE, X@N-term):39.76   | PEAKS PTM |
| K.DLAFPGSGEQVEK.L                                       | N    | 101.44 | 1375.6619 | 13     | -2.0 | 688.8369  | 2 | 30.08 | 14       | F14:1472 | OB5941<br>H1<br>raw.raw | 6.5563E7        | 9        | 9                   | 555   | 567 |                                       |                                                  | PEAKS DB  |
| K.NPQLQ <sup>L</sup> LD <sup>M</sup> MLTCVEIK(+14.02).E | N    | 101.30 | 2003.9730 | 17     | 2.1  | 1002.9958 | 2 | 38.00 | 14       | F14:1960 | OB5941<br>H1<br>raw.raw | 6.7851E5        | 2        | 2                   | 415   | 431 | Methylation(KR)                       | K17:Methylation(KR):1000.00                      | PEAKS PTM |
| K.S(+57.02)FN <sup>L</sup> DEGHALR.I                    | N    | 100.96 | 1314.6316 | 11     | 0.8  | 658.3236  | 2 | 27.59 | 14       | F14:1340 | OB5941<br>H1<br>raw.raw | 5.6012E6        | 7        | 7                   | 249   | 259 | Carbamidomethylation (DHKE, X@N-term) | S1:Carbamidomethylation (DHKE, X@N-term):101.71  | PEAKS PTM |
| R.RV <sup>L</sup> LLEENAGGEQEER.G                       | N    | 98.06  | 1727.8438 | 15     | 0.4  | 576.9554  | 3 | 24.77 | 13       | F13:1156 | OB5940<br>H1<br>raw.raw | 1.2517E5        | 5        | 5                   | 328   | 342 |                                       |                                                  | PEAKS DB  |
| R.IPSGFISYILNRHD <sup>N</sup> QNL <sup>R</sup> .V       | N    | 97.42  | 2256.1763 | 19     | 0.5  | 565.0516  | 4 | 33.66 | 14       | F14:1693 | OB5941<br>H1<br>raw.raw | 3.392E8         | 42       | 42                  | 260   | 278 |                                       |                                                  | PEAKS DB  |
| K.GSEEDITNPINLR.D                                       | N    | 97.01  | 1585.7583 | 14     | 2.4  | 793.8884  | 2 | 30.93 | 14       | F14:1527 | OB5941<br>H1<br>raw.raw | 3.0498E6        | 3        | 3                   | 380   | 393 |                                       |                                                  | PEAKS DB  |
| K.AM(+15.99)VIVVVNKG <sup>T</sup> GNLELVAVR.K.E         | N    | 96.33  | 2225.2930 | 21     | -0.4 | 1113.6533 | 2 | 30.76 | 14       | F14:1520 | OB5941<br>H1<br>raw.raw | 4.0787E7        | 8        | 7                   | 444   | 464 | Oxidation (M)                         | M2:Oxidation (M):100.0.00                        | PEAKS DB  |
| R.EGEQEWGTPGSEVRETSR.N                                  | Y    | 95.70  | 2161.9512 | 19     | 2.5  | 1081.9856 | 2 | 27.60 | 14       | F14:1311 | OB5941<br>H1<br>raw.raw | 2.0479E7        | 9        | 9                   | 147   | 165 |                                       |                                                  | PEAKS DB  |
| total 219 peptides                                      |      |        |           |        |      |           |   |       |          |          |                         |                 |          |                     |       |     |                                       |                                                  |           |

| Peptide                                           | Uniq | -10lgP | Mass      | Length | ppm  | m/z       | z | RT    | Fraction | Scan     | Source File        | Area Raw in gel | #Feature | #Feature Raw in gel | Start | End | PTM                                                                       | AScore                                                   | Found By  |
|---------------------------------------------------|------|--------|-----------|--------|------|-----------|---|-------|----------|----------|--------------------|-----------------|----------|---------------------|-------|-----|---------------------------------------------------------------------------|----------------------------------------------------------|-----------|
| K.KNPQLQLDMM(+15.99)LTC(+57.02)VEIK.E             | N    | 95.01  | 2191.0686 | 18     | -3.4 | 1096.5378 | 2 | 32.73 | 14       | F14:1643 | OB5941 H1 raw.raw  | 1.9787E5        | 1        | 1                   | 414   | 431 | Carbamidomethylation                                                      | M11:Oxidation (M):9.34;C14:Carbamidomethylation:100.00   | PEAKS DB  |
| K.NPQLQLDMM(-48.00)LTC(+57.02)VEIK.E              | N    | 93.52  | 1998.9755 | 17     | -2.5 | 1000.4926 | 2 | 32.55 | 14       | F14:1628 | OB5941 H1 raw.raw  | 1.3958E7        | 5        | 5                   | 415   | 431 | Carbamidomethylation                                                      | M10:Dethiomethyl:27.96;C13:Carbamidomethylation:100.00   | PEAKS PTM |
| K.NPQLQLDLM(+15.99)MLTC(+57.02)VEIKEGALMLPHFNSK.A | N    | 92.22  | 3387.6335 | 29     | -1.5 | 1130.2168 | 3 | 36.17 | 14       | F14:1926 | OB5941 H1 raw.raw  | 2.8061E7        | 4        | 4                   | 415   | 443 | Carbamidomethylation                                                      | M9:Oxidation (M):10.11;C13:Carbamidomethylation:100.00   | PEAKS DB  |
| R.NNPFYFPSRR.F                                    | N    | 92.08  | 1296.6364 | 10     | -3.0 | 649.3235  | 2 | 28.67 | 14       | F14:1408 | OB5941 H1 raw.raw  | 1.2788E8        | 21       | 21                  | 166   | 175 |                                                                           |                                                          | PEAKS DB  |
| K.EGALM(+15.99)LPHFNSK.A                          | N    | 91.98  | 1358.6653 | 12     | 2.1  | 680.3414  | 2 | 29.74 | 14       | F14:1443 | OB5941 H1 raw.raw  | 1.9561E6        | 3        | 3                   | 432   | 443 | Oxidation (M)                                                             | M5:Oxidation (M):100.00                                  | PEAKS DB  |
| R.VLLEENAGGEQEERGQRR.R                            | N    | 91.09  | 2069.0249 | 18     | 2.1  | 690.6837  | 3 | 25.31 | 14       | F14:1186 | OB5941 H1 raw.raw  | 1.1888E6        | 3        | 3                   | 329   | 346 |                                                                           |                                                          | PEAKS DB  |
| R.SSDNEGVIVKVSKEHVQLTK.H                          | N    | 91.01  | 2325.2175 | 21     | 1.3  | 776.0808  | 3 | 28.31 | 14       | F14:1362 | OB5941 H1 raw.raw  | 1.0201E5        | 2        | 2                   | 351   | 371 |                                                                           |                                                          | PEAKS DB  |
| K.KNPQLQLDMM(+15.99)LTC(+57.02)VEIKEGALMLPHFNSK.A | N    | 90.76  | 3515.7285 | 30     | -2.7 | 879.9370  | 4 | 34.52 | 13       | F13:1755 | OB5940 H1 raw.raw  | 2.6989E6        | 3        | 3                   | 414   | 443 | Carbamidomethylation                                                      | M11:Oxidation (M):30.46;C14:Carbamidomethylation:100.00  | PEAKS DB  |
| K.AM(-48.00)VIVVVNKG TGNLELVAVR.K                 | N    | 90.57  | 2033.1997 | 20     | -3.4 | 1017.6036 | 2 | 31.46 | 14       | F14:1539 | OB5941 H1 raw.raw  | 1.6588E7        | 6        | 6                   | 444   | 463 | Dethiomethyl                                                              | M2:Dethiomethyl:100.00                                   | PEAKS PTM |
| K.A(+57.02)MVIVVVNKG TGNLELVAVR.K                 | N    | 90.54  | 2138.2246 | 20     | -0.9 | 1070.1187 | 2 | 34.35 | 14       | F14:1737 | OB5941 H1 raw.raw  | 5.6414E6        | 3        | 3                   | 444   | 463 | Carbamidomethylation (DHKE, X@N-term)                                     | A1:Carbamidomethylation (DHKE, X@N-term):207.56          | PEAKS PTM |
| K.NPQLQLDMLMTC(+57.02)VEIKEGALM(+15.99)LPHFNSK.A  | N    | 90.37  | 3387.6335 | 29     | -1.5 | 1130.2168 | 3 | 36.17 | 14       | F14:1895 | OB5941 H1 raw.raw  | 3.1109E7        | 7        | 7                   | 415   | 443 | Carbamidomethylation; Oxidation (M)                                       | C13:Carbamidomethylation:1000.00;M22:Oxidation (M):69.89 | PEAKS DB  |
| K.H(+57.02)ADADNILVIQGGQATVTVAN(+.98)GNNRK.S      | N    | 90.07  | 2804.4165 | 26     | -1.3 | 935.8115  | 3 | 30.08 | 14       | F14:1476 | OB5941 H1 raw.raw  | 6.8084E6        | 2        | 2                   | 223   | 248 | H1:Carbamidomethylation (DHKE, X@N-term):45.01;N21:Deamidation (NQ):14.04 |                                                          | PEAKS PTM |
| K.KGSEEDITNPINLRDGEPLDLSNNFGR.L                   | N    | 89.87  | 3015.4170 | 27     | -4.2 | 1006.1421 | 3 | 31.29 | 14       | F14:1549 | OB5941 H1 raw.raw  | 7.6E7           | 16       | 16                  | 379   | 405 |                                                                           |                                                          | PEAKS DB  |
| F.LAGDKDNVIDQIEK.Q                                | N    | 89.22  | 1556.8046 | 14     | -3.2 | 779.4071  | 2 | 32.19 | 12       | F12:1557 | OB5939 H1 raw.raw  | 4.4864E6        | 2        | 2                   | 538   | 551 |                                                                           |                                                          | PEAKS DB  |
| K.I(+57.02)SMPVNTPGQFEDFPASSR.D                   | N    | 88.49  | 2283.0630 | 20     | -0.1 | 1142.5387 | 2 | 35.84 | 12       | F12:1793 | OB5939 H1 raw.raw  | 6.4772E5        | 1        | 1                   | 282   | 301 | Carbamidomethylation (DHKE, X@N-term)                                     | I1:Carbamidomethylation (DHKE, X@N-term):156.03          | PEAKS PTM |
| K.DLAFIGSGEQVEKLIK.N                              | N    | 87.96  | 1729.9249 | 16     | 1.0  | 865.9706  | 2 | 33.30 | 7        | F7:1601  | OB5934 H3B raw.raw | 6.2551E5        | 3        | 3                   | 555   | 570 |                                                                           |                                                          | PEAKS DB  |
| total 219 peptides                                |      |        |           |        |      |           |   |       |          |          |                    |                 |          |                     |       |     |                                                                           |                                                          |           |



| Peptide                                    | Uniq | -10lgP | Mass      | Length | ppm  | m/z       | z | RT    | Fraction | Scan     | Source File       | Area Raw in gel | #Feature | #Feature Raw in gel | Start | End | PTM                                   | AScore                                                   | Found By  |
|--------------------------------------------|------|--------|-----------|--------|------|-----------|---|-------|----------|----------|-------------------|-----------------|----------|---------------------|-------|-----|---------------------------------------|----------------------------------------------------------|-----------|
| K.EGALMLPHFNSK.A                           | N    | 87.95  | 1342.6703 | 12     | 2.5  | 672.3441  | 2 | 29.83 | 13       | F13:1462 | OB5940 H1 raw.raw | 9.3502E6        | 3        | 3                   | 432   | 443 |                                       |                                                          | PEAKS DB  |
| K.HADADNILVIQQGQATVTVAN(+.98)GNNR.K        | N    | 87.06  | 2619.3000 | 25     | -1.2 | 1310.6558 | 2 | 30.35 | 13       | F13:1535 | OB5940 H1 raw.raw | 4.8683E6        | 1        | 1                   | 223   | 247 |                                       | N21:Deamidation (N Q):7.32                               | PEAKS DB  |
| K.AMVIVVVK.G                               | N    | 86.97  | 971.5837  | 9      | 0.9  | 486.7996  | 2 | 29.88 | 12       | F12:1441 | OB5939 H1 raw.raw | 9.5124E6        | 3        | 3                   | 444   | 452 |                                       |                                                          | PEAKS DB  |
| K.GTGNLELVAVR.K                            | N    | 86.65  | 1127.6299 | 11     | -0.8 | 564.8218  | 2 | 29.74 | 14       | F14:1450 | OB5941 H1 raw.raw | 1.0907E7        | 6        | 6                   | 453   | 463 |                                       |                                                          | PEAKS DB  |
| R.NNPFYFPSR.R                              | N    | 86.37  | 1140.5352 | 9      | -3.8 | 571.2727  | 2 | 31.46 | 14       | F14:1552 | OB5941 H1 raw.raw | 1.201E7         | 5        | 5                   | 166   | 174 |                                       |                                                          | PEAKS DB  |
| K.HADADNILVIQQGQATVTVAN(-17.03)GNNRK.S     | N    | 86.12  | 2729.3845 | 26     | -1.1 | 910.8011  | 3 | 29.38 | 14       | F14:1429 | OB5941 H1 raw.raw | 8.2265E6        | 4        | 4                   | 223   | 248 |                                       | N21:Ammonia-loss (N):18.53                               | PEAKS PTM |
| R.NTLEAAFAEAFNEIRR.V                       | N    | 86.03  | 1893.9332 | 16     | -3.6 | 947.9705  | 2 | 35.28 | 12       | F12:1741 | OB5939 H1 raw.raw | 3.4229E8        | 38       | 38                  | 313   | 328 |                                       |                                                          | PEAKS DB  |
| R.I(+27.99)FLAGDKDNVIDQIEK.Q               | N    | 85.41  | 1844.9519 | 16     | 5.2  | 923.4880  | 2 | 36.16 | 14       | F14:1844 | OB5941 H1 raw.raw | 0               | 0        | 0                   | 536   | 551 | Formylation                           | I1:Formylation:77.93                                     | PEAKS PTM |
| K.SFNLDEGH(+57.02)ALR.I                    | N    | 84.87  | 1314.6316 | 11     | -1.2 | 658.3223  | 2 | 28.05 | 12       | F12:1298 | OB5939 H1 raw.raw | 5.1176E6        | 5        | 5                   | 249   | 259 |                                       | H8:Carbamidomethylation (DHKE, X@N-term):30.36           | PEAKS PTM |
| R.K(+57.02)SFNLDEGHALR.I                   | N    | 83.09  | 1442.7266 | 12     | -0.4 | 481.9159  | 3 | 25.70 | 14       | F14:1209 | OB5941 H1 raw.raw | 2.2174E5        | 3        | 3                   | 248   | 259 | Carbamidomethylation (DHKE, X@N-term) | K1:Carbamidomethylation (DHKE, X@N-term):51.63           | PEAKS PTM |
| K.KNPQLQLDLM(+15.99)MLTC(+57.02)VEIK.E     | N    | 81.54  | 2191.0686 | 18     | 0.7  | 1096.5424 | 2 | 33.03 | 12       | F12:1615 | OB5939 H1 raw.raw | 0               | 0        | 0                   | 414   | 431 | Carbamidomethylation                  | M10:Oxidation (M):14.02;C14:Carbamidomethylation:1000.00 | PEAKS DB  |
| K.KNPQLQLDMLMLTC(+57.02)VEIKEGALMLPHFNSK.A | N    | 81.26  | 3499.7336 | 30     | -0.1 | 875.9406  | 4 | 36.52 | 14       | F14:1868 | OB5941 H1 raw.raw | 1.091E7         | 3        | 3                   | 414   | 443 | Carbamidomethylation                  | C14:Carbamidomethylation:1000.00                         | PEAKS DB  |
| K.GTGNLELVAVRK.E                           | N    | 79.30  | 1255.7249 | 12     | 0.9  | 628.8702  | 2 | 26.85 | 14       | F14:1263 | OB5941 H1 raw.raw | 1.0437E7        | 9        | 9                   | 453   | 464 |                                       |                                                          | PEAKS DB  |
| R.GRREQEWEEEEEEEEGSNR.E                    | N    | 79.15  | 2650.0649 | 21     | 0.3  | 884.3625  | 3 | 25.64 | 13       | F13:1205 | OB5940 H1 raw.raw | 2.2346E6        | 7        | 7                   | 470   | 490 |                                       |                                                          | PEAKS DB  |
| E.PDLSNNFGR.L                              | N    | 78.38  | 1018.4832 | 9      | -0.1 | 510.2488  | 2 | 31.24 | 14       | F14:1545 | OB5941 H1 raw.raw | 3.5959E6        | 3        | 3                   | 397   | 405 |                                       |                                                          | PEAKS DB  |
| R.EETSRNNPFYFPSRR.F                        | N    | 78.31  | 1898.9023 | 15     | 1.2  | 633.9755  | 3 | 27.17 | 13       | F13:1289 | OB5940 H1 raw.raw | 6.7264E6        | 6        | 6                   | 161   | 175 |                                       |                                                          | PEAKS DB  |
| R.IFLAGDKDNVIDQIE(+57.02)K.Q               | N    | 78.23  | 1873.9785 | 16     | -5.0 | 937.9919  | 2 | 32.19 | 14       | F14:1583 | OB5941 H1 raw.raw | 3.036E7         | 3        | 3                   | 536   | 551 |                                       | E15:Carbamidomethylation (DHKE, X@N-term):0.00           | PEAKS PTM |
| I.PSGFISYILNR.H                            | N    | 77.77  | 1265.6768 | 11     | 2.4  | 633.8472  | 2 | 36.17 | 13       | F13:1844 | OB5940 H1 raw.raw | 2.5204E5        | 2        | 2                   | 261   | 271 |                                       |                                                          | PEAKS DB  |
| I.FLAGDKDNVIDQIEK.Q                        | N    | 77.74  | 1703.8729 | 15     | -9.3 | 852.9358  | 2 | 32.01 | 14       | F14:1599 | OB5941 H1 raw.raw | 1.3574E6        | 3        | 3                   | 537   | 551 |                                       |                                                          | PEAKS DB  |
| K.D(+57.02)LAFPGSGEQVEK.L                  | N    | 77.21  | 1432.6833 | 13     | 3.8  | 717.3517  | 2 | 30.92 | 12       | F12:1485 | OB5939 H1 raw.raw | 2.816E5         | 1        | 1                   | 555   | 567 | Carbamidomethylation (DHKE, X@N-term) | D1:Carbamidomethylation (DHKE, X@N-term)                 | PEAKS PTM |
| total 219 peptides                         |      |        |           |        |      |           |   |       |          |          |                   |                 |          |                     |       |     |                                       |                                                          |           |

| Peptide                                          | Uniq | -10lgP | Mass      | Length | ppm  | m/z       | z | RT    | Fraction | Scan     | Source File              | Area Raw in gel | #Feature | #Feature Raw in gel | Start | End | PTM                                   | AScore                                                                   | Found By  |
|--------------------------------------------------|------|--------|-----------|--------|------|-----------|---|-------|----------|----------|--------------------------|-----------------|----------|---------------------|-------|-----|---------------------------------------|--------------------------------------------------------------------------|-----------|
|                                                  |      |        |           |        |      |           |   |       |          |          |                          |                 |          |                     |       |     |                                       | X@N-term):93.18                                                          |           |
| R.SSDNEGVIVK.V                                   | N    | 76.72  | 1046.5244 | 10     | 0.3  | 524.2697  | 2 | 22.95 | 13       | F13:1057 | OB5940<br>H1<br>raw.raw  | 2.6758E5        | 6        | 6                   | 351   | 360 |                                       |                                                                          | PEAKS DB  |
| K.Q(-17.03)FQNLQNHRI                             | N    | 76.65  | 1166.5581 | 9      | -1.5 | 584.2855  | 2 | 27.77 | 14       | F14:1319 | OB5941<br>H1<br>raw.raw  | 3.3996E6        | 3        | 3                   | 199   | 207 | Pyro-glu from Q                       | Q1:Pyro-glu from Q:1000.00                                               | PEAKS PTM |
| K.HAD(+57.02)ADNILVIQQGQATVTVAN(+.98)GNNRK.S     | N    | 74.85  | 2804.4165 | 26     | -5.0 | 935.8081  | 3 | 28.96 | 13       | F13:1511 | OB5940<br>H1<br>raw.raw  | 3.7976E6        | 1        | 1                   | 223   | 248 |                                       | D3:Carbamidomethylation (DHKE, X@N-term):6.59;N21:Deamidation (NQ):14.04 | PEAKS PTM |
| K.HADADNILVIQQGQATVTVANGN(-17.03)NRK.S           | N    | 74.65  | 2729.3845 | 26     | -3.3 | 1365.6951 | 2 | 29.38 | 14       | F14:1432 | OB5941<br>H1<br>raw.raw  | 5.4978E5        | 1        | 1                   | 223   | 248 |                                       | N23:Ammonia-loss (N):0.00                                                | PEAKS PTM |
| K.ISMPVNTPGQFEDFFPASSRDQSSYLQGFSR.N              | N    | 74.49  | 3494.6201 | 31     | 2.7  | 1165.8838 | 3 | 36.29 | 2        | F2:1620  | OB5925<br>H3B<br>raw.raw | 9.3886E7        | 15       | 15                  | 282   | 312 |                                       |                                                                          | PEAKS DB  |
| R.NTLEAAFNAEFN(+.98)EIRR.V                       | N    | 74.39  | 1894.9172 | 16     | -3.7 | 948.4624  | 2 | 32.73 | 14       | F14:1640 | OB5941<br>H1<br>raw.raw  | 4.113E6         | 3        | 3                   | 313   | 328 | Deamidation (NQ)                      | N12:Deamidation (NQ):55.21                                               | PEAKS DB  |
| R.LFEVKPKKKNPQLQDLDMMLTC(+57.02)VEIK.E           | N    | 73.38  | 3131.6069 | 26     | 3.7  | 1044.8801 | 3 | 33.97 | 13       | F13:1716 | OB5940<br>H1<br>raw.raw  | 3.7487E6        | 3        | 3                   | 406   | 431 | Carbamidomethylation                  | C22:Carbamidomethylation:1000.00                                         | PEAKS DB  |
| K.NPQLQDLDMM(+15.99)LTC(+57.02)VEIKEGALMLPHFSK.A | N    | 73.21  | 3387.6335 | 29     | 5.6  | 847.9204  | 4 | 35.82 | 13       | F13:1825 | OB5940<br>H1<br>raw.raw  | 9.6415E6        | 3        | 3                   | 415   | 443 | Carbamidomethylation                  | M10:Oxidation (M):16.90;C13:Carbamidomethylation:1000.00                 | PEAKS DB  |
| A.GDKDNVIDQIEK.Q                                 | N    | 73.04  | 1372.6833 | 12     | -2.8 | 687.3470  | 2 | 32.19 | 12       | F12:1561 | OB5939<br>H1<br>raw.raw  | 1.4449E6        | 3        | 3                   | 540   | 551 |                                       |                                                                          | PEAKS DB  |
| R.V(+57.02)LLEENAGGEQEER.G                       | N    | 73.00  | 1628.7642 | 14     | 1.1  | 815.3903  | 2 | 27.03 | 14       | F14:1288 | OB5941<br>H1<br>raw.raw  | 2.7852E5        | 3        | 3                   | 329   | 342 |                                       | V1:Carbamidomethylation (DHKE, X@N-term):44.44                           | PEAKS PTM |
| R.EETSRNNPFYFPSR.R                               | N    | 72.75  | 1742.8011 | 14     | -0.9 | 581.9405  | 3 | 29.89 | 12       | F12:1419 | OB5939<br>H1<br>raw.raw  | 4.0306E4        | 1        | 1                   | 161   | 174 |                                       |                                                                          | PEAKS DB  |
| R.IPSGFISYLN(-17.03)R.H                          | N    | 72.57  | 1361.7343 | 12     | 1.4  | 681.8754  | 2 | 37.47 | 13       | F13:1926 | OB5940<br>H1<br>raw.raw  | 5.3561E5        | 2        | 2                   | 260   | 271 | Ammonia-loss (N)                      | N11:Ammonia-loss (N):1000.00                                             | PEAKS PTM |
| R.IPSGFISY(+125.90)ILNR.H                        | N    | 72.49  | 1504.6575 | 12     | 1.5  | 753.3372  | 2 | 37.84 | 13       | F13:1946 | OB5940<br>H1<br>raw.raw  | 9.8379E5        | 2        | 2                   | 260   | 271 | Iodination                            | Y8:Iodination:1000.00                                                    | PEAKS PTM |
| R.IPSGFISYILNRH(+57.02)DNQNL.R.V                 | N    | 72.20  | 2313.1978 | 19     | 2.0  | 579.3079  | 4 | 33.29 | 12       | F12:1633 | OB5939<br>H1<br>raw.raw  | 3.81E7          | 4        | 4                   | 260   | 278 |                                       | H13:Carbamidomethylation (DHKE, X@N-term):9.34                           | PEAKS PTM |
| R.VLLEEN(+.98)AGGEQEER.G                         | N    | 71.59  | 1572.7267 | 14     | -3.7 | 787.3677  | 2 | 26.82 | 13       | F13:1276 | OB5940<br>H1<br>raw.raw  | 0               | 0        | 0                   | 329   | 342 | Deamidation (NQ)                      | N6:Deamidation (NQ):71.64                                                | PEAKS DB  |
| A.FPGSGEQVEK.L                                   | N    | 71.45  | 1076.5138 | 10     | 5.5  | 539.2672  | 2 | 30.23 | 12       | F12:1449 | OB5939<br>H1<br>raw.raw  | 6.1112E4        | 1        | 1                   | 558   | 567 |                                       |                                                                          | PEAKS DB  |
| K.A(+57.02)MVIVVVKGTGNLELVAVRK.E                 | N    | 70.77  | 2266.3196 | 21     | -1.6 | 1134.1653 | 2 | 32.33 | 13       | F13:1602 | OB5940<br>H1<br>raw.raw  | 4.861E7         | 6        | 6                   | 444   | 464 | Carbamidomethylation (DHKE, X@N-term) | A1:Carbamidomethylation (DHKE, X@N-term):161.20                          | PEAKS PTM |
| total 219 peptides                               |      |        |           |        |      |           |   |       |          |          |                          |                 |          |                     |       |     |                                       |                                                                          |           |

| Peptide                                               | Uniq | -10lgP | Mass      | Length | ppm  | m/z       | z | RT    | Fraction | Scan     | Source File        | Area Raw in gel | #Feature | #Feature Raw in gel | Start | End | PTM                                   | AScore                                                                                 | Found By  |
|-------------------------------------------------------|------|--------|-----------|--------|------|-----------|---|-------|----------|----------|--------------------|-----------------|----------|---------------------|-------|-----|---------------------------------------|----------------------------------------------------------------------------------------|-----------|
| K.AM(+15.99)VIVVVNK.G                                 | N    | 70.64  | 987.5787  | 9      | 0.7  | 494.7969  | 2 | 26.66 | 14       | F14:1257 | OB5941 H1 raw.raw  | 8.6431E5        | 3        | 3                   | 444   | 452 | Oxidation (M)                         | M2:Oxidation (M):100.0.00                                                              | PEAKS DB  |
| K.KNPQLQDLMLTLC(+57.02)VEIKEGALM(+15.99)LPHFNSK.A     | N    | 70.55  | 3515.7285 | 30     | -0.8 | 879.9387  | 4 | 35.84 | 12       | F12:1790 | OB5939 H1 raw.raw  | 4.7958E6        | 2        | 2                   | 414   | 443 | Carbamidomethylation; Oxidation (M)   | C14:Carbamidomethylation:1000.00;M23:Oxidation (M):69.38                               | PEAKS DB  |
| K.SVSKKGSEEDITNPINLR.D                                | N    | 69.76  | 2115.0808 | 19     | 2.6  | 706.0361  | 3 | 27.22 | 14       | F14:1299 | OB5941 H1 raw.raw  | 5.5052E4        | 1        | 1                   | 375   | 393 |                                       |                                                                                        | PEAKS DB  |
| Q.GQATVTVAN(+.98)GNNRK.S                              | N    | 69.60  | 1429.7273 | 14     | -4.1 | 715.8680  | 2 | 29.38 | 14       | F14:1424 | OB5941 H1 raw.raw  | 5.134E5         | 2        | 2                   | 235   | 248 |                                       | N9:Deamidation (NQ):41.83                                                              | PEAKS DB  |
| R.NT(-18.01)LEAAFAEFNEIRR.V                           | N    | 68.32  | 1875.9227 | 16     | -3.2 | 626.3129  | 3 | 33.81 | 14       | F14:1704 | OB5941 H1 raw.raw  | 1.3248E7        | 3        | 3                   | 313   | 328 | Dehydration                           | T2:Dehydration:1000.00                                                                 | PEAKS PTM |
| G.SEEEDITNPINLRDGEPLDLSNNFGR.L                        | N    | 67.86  | 2830.3005 | 25     | 1.2  | 944.4419  | 3 | 32.96 | 8        | F8:1576  | OB5935 H3B raw.raw | 5.6172E5        | 3        | 3                   | 381   | 405 |                                       |                                                                                        | PEAKS DB  |
| R.IVQIEARPNTLVLPK.H                                   | Y    | 67.84  | 1690.0140 | 15     | 2.2  | 846.0161  | 2 | 30.65 | 7        | F7:1446  | OB5934 H3B raw.raw | 2.806E8         | 26       | 26                  | 208   | 222 |                                       |                                                                                        | PEAKS DB  |
| R.LFEVKPKKNPQLQDLDM(+15.99)M(+15.99)LTC(+57.02)VEIK.E | N    | 67.75  | 3163.5967 | 26     | 2.1  | 791.9081  | 4 | 32.37 | 12       | F12:1585 | OB5939 H1 raw.raw  | 6.2675E5        | 1        | 1                   | 406   | 431 | Oxidation (M); Carbamidomethylation   | M18:Oxidation (M):100.0.00;M19:Oxidation (M):1000.00;C22:Carbamidomethylation:100.0.00 | PEAKS DB  |
| L.AGDKDNVIDQIEK.Q                                     | N    | 66.85  | 1443.7205 | 13     | -3.1 | 722.8653  | 2 | 32.19 | 12       | F12:1560 | OB5939 H1 raw.raw  | 7.0907E5        | 2        | 2                   | 539   | 551 |                                       |                                                                                        | PEAKS DB  |
| K.G(+57.02)TGNLELVAVRK.E                              | N    | 66.68  | 1312.7462 | 12     | -0.7 | 657.3799  | 2 | 26.85 | 14       | F14:1280 | OB5941 H1 raw.raw  | 3.417E5         | 3        | 3                   | 453   | 464 | Carbamidomethylation (DHKE, X@N-term) | G1:Carbamidomethylation (DHKE, X@N-term):56.51                                         | PEAKS PTM |
| R.EGEQEWGTP(+15.99)GSEVREETSR.N                       | Y    | 66.56  | 2177.9460 | 19     | 1.3  | 726.9902  | 3 | 26.28 | 14       | F14:1241 | OB5941 H1 raw.raw  | 4.0056E6        | 2        | 2                   | 147   | 165 | P9:Oxidation or Hydroxylation:36.47   |                                                                                        | PEAKS PTM |
| K.SFNLDGHALRIPSGFISYILNRHDNQNL.R.V                    | N    | 66.45  | 3495.7759 | 30     | -1.2 | 700.1616  | 5 | 36.31 | 13       | F13:1855 | OB5940 H1 raw.raw  | 1.2605E8        | 16       | 16                  | 249   | 278 |                                       |                                                                                        | PEAKS DB  |
| K.QFQNLQNHR.I                                         | N    | 66.40  | 1183.5846 | 9      | 0.2  | 592.7997  | 2 | 24.53 | 14       | F14:1134 | OB5941 H1 raw.raw  | 7.3427E4        | 5        | 5                   | 199   | 207 |                                       |                                                                                        | PEAKS DB  |
| D.KDNVIDQIEK.Q                                        | N    | 66.36  | 1200.6350 | 10     | -0.8 | 601.3243  | 2 | 25.89 | 14       | F14:1225 | OB5941 H1 raw.raw  | 5.8609E4        | 3        | 3                   | 542   | 551 |                                       |                                                                                        | PEAKS DB  |
| K.NPQLQ(+.98)DLMLTLC(+57.02)VEIKEGALMLPHFNSK.A        | N    | 66.16  | 3372.6226 | 29     | 5.7  | 1125.2212 | 3 | 37.84 | 13       | F13:1936 | OB5940 H1 raw.raw  | 5.3127E7        | 3        | 3                   | 415   | 443 | Carbamidomethylation                  | Q5:Deamidation (NQ):32.28;C13:Carbamidomethylation:1000.00                             | PEAKS DB  |
| K.HADADNIIIVQGGQATVTVANGNN(+.98)RK.S                  | N    | 65.93  | 2747.3950 | 26     | 4.5  | 1374.7109 | 2 | 29.70 | 10       | F10:1444 | OB5937 H3A raw.raw | 5.6818E5        | 3        | 3                   | 223   | 248 |                                       | N24:Deamidation (NQ):14.02                                                             | PEAKS DB  |
| K.ISMPVNTPGQ(+.98)FEDFFPASSR.D                        | N    | 65.70  | 2227.0254 | 20     | 6.4  | 1114.5271 | 2 | 63.55 | 14       | F14:3427 | OB5941 H1 raw.raw  | 1.0155E4        | 2        | 2                   | 282   | 301 |                                       | Q10:Deamidation (NQ):33.26                                                             | PEAKS DB  |
| R.N(+.98)TLEAAFAEFNEIRR.V                             | N    | 65.61  | 1894.9172 | 16     | 2.2  | 948.4680  | 2 | 35.88 | 12       | F12:1787 | OB5939 H1 raw.raw  | 7.0859E7        | 1        | 1                   | 313   | 328 | Deamidation (NQ)                      | N1:Deamidation (NQ):61.82                                                              | PEAKS DB  |
| total 219 peptides                                    |      |        |           |        |      |           |   |       |          |          |                    |                 |          |                     |       |     |                                       |                                                                                        |           |

| Peptide                                                   | Uniq | -10lgP | Mass      | Length | ppm  | m/z       | z | RT    | Fraction | Scan     | Source File        | Area Raw in gel | #Feature | #Feature Raw in gel | Start | End | PTM                                                  | AScore                                                                         | Found By  |
|-----------------------------------------------------------|------|--------|-----------|--------|------|-----------|---|-------|----------|----------|--------------------|-----------------|----------|---------------------|-------|-----|------------------------------------------------------|--------------------------------------------------------------------------------|-----------|
| K.KNPQLQLDLM(+15.99)MLTC(+57.02)VEIKEGALMLPHFNSK.A        | N    | 65.47  | 3515.7285 | 30     | -3.1 | 879.9366  | 4 | 35.44 | 13       | F13:1830 | OB5940 H1 raw.raw  | 7.2415E6        | 3        | 3                   | 414   | 443 | Carbamidomethylation                                 | M10:Oxidation (M):11.06;C14:Carbamidomethylation:100.00                        | PEAKS DB  |
| K.ISM(+15.99)PVNTPGQ(+.98)FEDFFPASSRDQSSYLQGFSR.N         | N    | 65.25  | 3511.5989 | 31     | 4.3  | 1171.5453 | 3 | 34.92 | 12       | F12:1731 | OB5939 H1 raw.raw  | 1.4851E6        | 1        | 1                   | 282   | 312 | Oxidation (M)                                        | M3:Oxidation (M):100.00;Q10:Deamidation (NQ):27.62                             | PEAKS DB  |
| K.NPQLQLDLM(+15.99)MLTC(+57.02)VEIKEGALM(+15.99)LPHFNSK.A | N    | 64.53  | 3403.6284 | 29     | 4.5  | 1135.5552 | 3 | 36.52 | 14       | F14:1873 | OB5941 H1 raw.raw  | 4.3451E6        | 3        | 3                   | 415   | 443 | Carbamidomethylation; Oxidation (M)                  | M9:Oxidation (M):10.11;C13:Carbamidomethylation:100.00;M22:Oxidation (M):53.09 | PEAKS DB  |
| R.LFEVKPKD.K                                              | N    | 63.66  | 974.5436  | 8      | 0.9  | 488.2795  | 2 | 25.40 | 12       | F12:1153 | OB5939 H1 raw.raw  | 6.8606E5        | 7        | 7                   | 406   | 413 |                                                      |                                                                                | PEAKS DB  |
| F.NLDEGHAI.R                                              | N    | 63.51  | 1023.5097 | 9      | 2.3  | 512.7633  | 2 | 27.35 | 13       | F13:1309 | OB5940 H1 raw.raw  | 1.5878E6        | 3        | 3                   | 251   | 259 |                                                      |                                                                                | PEAKS DB  |
| R.WGPAEPR.E                                               | Y    | 63.43  | 811.3976  | 7      | 1.2  | 406.7066  | 2 | 25.31 | 14       | F14:1167 | OB5941 H1 raw.raw  | 1.2167E6        | 5        | 5                   | 109   | 115 |                                                      |                                                                                | PEAKS DB  |
| R.EQEWEHEHEHEHEGNSREVR.R                                  | N    | 63.32  | 2665.0535 | 21     | 2.4  | 889.3606  | 3 | 27.87 | 12       | F12:1308 | OB5939 H1 raw.raw  | 4.1617E5        | 2        | 2                   | 473   | 493 |                                                      |                                                                                | PEAKS DB  |
| R.REQEWEHEHEHEHEGNSR.E                                    | N    | 63.17  | 2436.9424 | 19     | 2.8  | 1219.4819 | 2 | 26.47 | 14       | F14:1258 | OB5941 H1 raw.raw  | 2.6135E4        | 2        | 2                   | 472   | 490 |                                                      |                                                                                | PEAKS DB  |
| K.ISM(-48.00)PVNTPGQFEDFFPASSR.D                          | N    | 62.93  | 2178.0381 | 20     | 0.2  | 727.0201  | 3 | 32.37 | 12       | F12:1577 | OB5939 H1 raw.raw  | 2.6788E7        | 5        | 5                   | 282   | 301 | Dethiomethyl                                         | M3:Dethiomethyl:100.00                                                         | PEAKS PTM |
| N.TPGQFEDFFPASSR.D                                        | N    | 62.85  | 1584.7208 | 14     | -0.2 | 793.3676  | 2 | 35.63 | 14       | F14:1821 | OB5941 H1 raw.raw  | 2.1663E5        | 1        | 1                   | 288   | 301 |                                                      |                                                                                | PEAKS DB  |
| K.A(+57.02)M(+15.99)VIVVVKGTGNLELVAVR.K                   | N    | 62.49  | 2154.2195 | 20     | -0.1 | 1078.1169 | 2 | 32.92 | 12       | F12:1614 | OB5939 H1 raw.raw  | 4.5509E5        | 2        | 2                   | 444   | 463 | Carbamidomethylation (DHKE, X@N-term); Oxidation (M) | A1:Carbamidomethylation (DHKE, X@N-term):139.69; M2:Oxidation (M):100.00       | PEAKS PTM |
| L.EAAFNAEFNEIRR.V                                         | N    | 62.30  | 1565.7585 | 13     | -4.7 | 783.8829  | 2 | 34.06 | 12       | F12:1677 | OB5939 H1 raw.raw  | 6.1232E5        | 1        | 1                   | 316   | 328 |                                                      |                                                                                | PEAKS DB  |
| K.N(+.98)PQLQLDMLMLTC(+57.02)VEIKEGALMLPHFNSK.A           | N    | 61.86  | 3372.6226 | 29     | 5.7  | 1125.2212 | 3 | 37.84 | 13       | F13:1983 | OB5940 H1 raw.raw  | 1.2903E7        | 1        | 1                   | 415   | 443 | Carbamidomethylation                                 | N1:Deamidation (NQ):14.04;C13:Carbamidomethylation:1000.00                     | PEAKS DB  |
| K.HADADNIIQVGGQ(+.98)ATVTVAN(+.98)GNNRK.S                 | N    | 61.75  | 2748.3792 | 26     | 1.4  | 1375.1987 | 2 | 29.55 | 13       | F13:1443 | OB5940 H1 raw.raw  | 4.856E5         | 1        | 1                   | 223   | 248 |                                                      | Q14:Deamidation (NQ):32.28;N21:Deamidation (NQ):14.04                          | PEAKS DB  |
| N.LDEGHAI.R                                               | N    | 60.44  | 909.4668  | 8      | 0.6  | 455.7409  | 2 | 27.35 | 13       | F13:1312 | OB5940 H1 raw.raw  | 3.1152E4        | 1        | 1                   | 252   | 259 |                                                      |                                                                                | PEAKS DB  |
| R.IFLAGDKDNVIDQ(+.98)IEKQAK.D                             | N    | 58.72  | 2145.1316 | 19     | 9.3  | 716.0578  | 3 | 32.93 | 2        | F2:1432  | OB5925 H3B raw.raw | 1.5596E6        | 1        | 1                   | 536   | 554 |                                                      | Q13:Deamidation (NQ):0.00                                                      | PEAKS DB  |
| K.HADADNIIQV(+.98)Q(+.98)GQATVTVAN(+.98)GNNRK.S           | N    | 58.62  | 2749.3630 | 26     | 9.6  | 917.4705  | 3 | 30.18 | 13       | F13:1524 | OB5940 H1 raw.raw  | 4.3812E6        | 1        | 1                   | 223   | 248 |                                                      | Q11:Deamidation (NQ):26.52;Q                                                   | PEAKS DB  |
| total 219 peptides                                        |      |        |           |        |      |           |   |       |          |          |                    |                 |          |                     |       |     |                                                      |                                                                                |           |

| Peptide                                          | Uniq | -10lgP | Mass      | Length | ppm  | m/z       | z | RT    | Fraction | Scan     | Source File       | Area Raw in gel | #Feature | #Feature Raw in gel | Start | End | PTM                                   | AScore                                                                           | Found By  |
|--------------------------------------------------|------|--------|-----------|--------|------|-----------|---|-------|----------|----------|-------------------|-----------------|----------|---------------------|-------|-----|---------------------------------------|----------------------------------------------------------------------------------|-----------|
|                                                  |      |        |           |        |      |           |   |       |          |          |                   |                 |          |                     |       |     |                                       | 12:Deamidation (NQ):18.53;N21:Deamidation (NQ):14.04                             |           |
| R.D(+57.02)QSSYLQGFSR.N                          | N    | 58.49  | 1343.6106 | 11     | -2.5 | 672.8109  | 2 | 31.19 | 12       | F12:1506 | OB5939 H1 raw.raw | 3.7713E4        | 1        | 1                   | 302   | 312 | Carbamidomethylation (DHKE, X@N-term) | D1:Carbamidomethylation (DHKE, X@N-term):1000.00                                 | PEAKS PTM |
| K.HADADNILVIQ(+.98)QGQATVTVAN(+.98)GNNRK.S       | N    | 58.29  | 2748.3792 | 26     | 4.6  | 1375.2031 | 2 | 31.28 | 12       | F12:1539 | OB5939 H1 raw.raw | 1.8636E5        | 1        | 1                   | 223   | 248 |                                       | Q11:Deamidation (NQ):15.10;N21:Deamidation (NQ):17.01                            | PEAKS DB  |
| K.HADADN(+.98)ILVIQ(+.98)QGQATVTVANGNNRK.S       | N    | 57.75  | 2748.3792 | 26     | 3.1  | 1375.2010 | 2 | 30.08 | 14       | F14:1495 | OB5941 H1 raw.raw | 1.5756E6        | 1        | 1                   | 223   | 248 |                                       | N6:Deamidation (NQ):0.00;Q11:Deamidation (NQ):0.00                               | PEAKS DB  |
| N.PFYFPSRR.F                                     | N    | 57.72  | 1068.5504 | 8      | 3.3  | 535.2842  | 2 | 28.95 | 12       | F12:1360 | OB5939 H1 raw.raw | 3.0845E6        | 3        | 3                   | 168   | 175 |                                       |                                                                                  | PEAKS DB  |
| R.LFEVKPKKPNQLQDLDMM(+15.99)LTC(+57.02)VEIK.E    | N    | 57.62  | 3147.6018 | 26     | -4.4 | 787.9042  | 4 | 32.55 | 14       | F14:1633 | OB5941 H1 raw.raw | 2.1102E6        | 3        | 3                   | 406   | 431 | Carbamidomethylation                  | M19:Oxidation (M):17.01;C22:Carbamidomethylation:1000.00                         | PEAKS DB  |
| K.SFN(+.98)LDEGHALRIPSGFISYILNR.H                | N    | 57.28  | 2619.3445 | 23     | 9.3  | 655.8495  | 4 | 38.22 | 12       | F12:1947 | OB5939 H1 raw.raw | 1.0265E6        | 2        | 2                   | 249   | 271 |                                       | N3:Deamidation (NQ):32.08                                                        | PEAKS DB  |
| K.AMVIVVN(+.98)KGTGNLELVAVRK.E                   | N    | 56.84  | 2210.2820 | 21     | 9.6  | 737.7750  | 3 | 33.10 | 14       | F14:1664 | OB5941 H1 raw.raw | 8.0625E6        | 2        | 2                   | 444   | 464 |                                       | N8:Deamidation (NQ):41.87                                                        | PEAKS DB  |
| K.KNPQLQLDMM(-48.00)LTC(+57.02)VEIK.E            | N    | 56.43  | 2127.0703 | 18     | 0.8  | 710.0312  | 3 | 31.11 | 14       | F14:1538 | OB5941 H1 raw.raw | 3.3192E6        | 2        | 2                   | 414   | 431 | Carbamidomethylation                  | M11:Dethiomethyl:14.02;C14:Carbamidomethylation:1000.00                          | PEAKS PTM |
| K.ISM(+15.99)PVNTPGQFEDFFPASSRDQSSYLQGFSR.N      | N    | 56.19  | 3510.6150 | 31     | 2.9  | 1171.2157 | 3 | 34.90 | 14       | F14:1765 | OB5941 H1 raw.raw | 1.0055E7        | 8        | 8                   | 282   | 312 | Oxidation (M)                         | M3:Oxidation (M):1000.00                                                         | PEAKS DB  |
| V.QIEARPNTLVLPK.H                                | Y    | 55.52  | 1477.8616 | 13     | -3.7 | 739.9353  | 2 | 30.24 | 14       | F14:1485 | OB5941 H1 raw.raw | 9.708E5         | 3        | 3                   | 210   | 222 |                                       |                                                                                  | PEAKS DB  |
| R.N(+57.02)NPFYFPSRR.F                           | N    | 55.47  | 1353.6577 | 10     | -2.6 | 677.8344  | 2 | 29.38 | 14       | F14:1433 | OB5941 H1 raw.raw | 6.1234E5        | 2        | 2                   | 166   | 175 | Carbamidomethylation (DHKE, X@N-term) | N1:Carbamidomethylation (DHKE, X@N-term):1000.00                                 | PEAKS PTM |
| R.SKQFQNLQNHR.I                                  | Y    | 55.18  | 1398.7117 | 11     | 1.0  | 467.2450  | 3 | 24.31 | 13       | F13:1132 | OB5940 H1 raw.raw | 2.6796E4        | 3        | 3                   | 197   | 207 |                                       |                                                                                  | PEAKS DB  |
| K.HADADNILVIQQGQATVTVANGN(+.98)NRK.S             | N    | 55.13  | 2747.3950 | 26     | 4.2  | 687.8589  | 4 | 29.51 | 12       | F12:1401 | OB5939 H1 raw.raw | 2.4633E7        | 5        | 5                   | 223   | 248 |                                       | N23:Deamidation (NQ):17.01                                                       | PEAKS DB  |
| K.HADADNILVIQQ(+.98)GQ(+.98)ATVTVAN(+.98)GNNRK.S | N    | 55.12  | 2749.3630 | 26     | 9.6  | 917.4705  | 3 | 30.18 | 13       | F13:1487 | OB5940 H1 raw.raw | 4.3812E6        | 1        | 1                   | 223   | 248 |                                       | Q12:Deamidation (NQ):14.02;Q14:Deamidation (NQ):13.03;N21:Deamidation (NQ):11.10 | PEAKS DB  |
| K.AM(-48.00)VIVVNVKGTGNLELVAVRK.E                | N    | 54.93  | 2161.2947 | 21     | 1.4  | 1081.6561 | 2 | 29.80 | 14       | F14:1453 | OB5941 H1 raw.raw | 1.7581E6        | 2        | 2                   | 444   | 464 | Dethiomethyl                          | M2:Dethiomethyl:1000.00                                                          | PEAKS PTM |
| total 219 peptides                               |      |        |           |        |      |           |   |       |          |          |                   |                 |          |                     |       |     |                                       |                                                                                  |           |

| Peptide                                                       | Uniq | -10lgP | Mass      | Length | ppm  | m/z       | z | RT    | Fraction | Scan     | Source File       | Area Raw in gel | #Feature | #Feature Raw in gel | Start | End | PTM                                    | AScore                                                                                                      | Found By  |
|---------------------------------------------------------------|------|--------|-----------|--------|------|-----------|---|-------|----------|----------|-------------------|-----------------|----------|---------------------|-------|-----|----------------------------------------|-------------------------------------------------------------------------------------------------------------|-----------|
| R.I(+57.02)VQIEARPNTLVLPK.H                                   | Y    | 54.55  | 1747.0355 | 15     | 3.8  | 874.5283  | 2 | 30.92 | 12       | F12:1489 | OB5939 H1 raw.raw | 3.7453E7        | 4        | 4                   | 208   | 222 | Carbamidomethylation (DHKE, X@N-term)  | I1:Carbamidomethylation (DHKE, X@N-term):97.69                                                              | PEAKS PTM |
| K.NPQLQDLDM(+15.99)MLTC(+57.02)VEIKEGALMLPHFN(+.98)SK.A       | N    | 54.06  | 3388.6174 | 29     | 5.0  | 848.1659  | 4 | 36.17 | 14       | F14:1849 | OB5941 H1 raw.raw | 6.0156E6        | 2        | 2                   | 415   | 443 | Carbamidomethylation; Deamidation (NQ) | M9:Oxidation (M):14.02;C13:Carbamidomethylation:1000.00;N27:Deamidation (NQ):58.23                          | PEAKS DB  |
| K.IRPEGREGSEQEWGTPGSEVREETSR.N                                | Y    | 53.77  | 2870.3542 | 25     | 1.1  | 718.5966  | 4 | 27.49 | 12       | F12:1279 | OB5939 H1 raw.raw | 3.216E6         | 3        | 3                   | 141   | 165 |                                        |                                                                                                             | PEAKS DB  |
| R.IFLAGDKDNVIDQIE(+57.02)KQAK.D                               | N    | 52.99  | 2201.1692 | 19     | -2.0 | 734.7289  | 3 | 31.83 | 13       | F13:1588 | OB5940 H1 raw.raw | 3.3379E6        | 2        | 2                   | 536   | 554 |                                        | E15:Carbamidomethylation (DHKE, X@N-term):12.28                                                             | PEAKS PTM |
| K.NPQLQDLDMMLTC(+57.02)VEIKEGALMLPHFN(+.98)SK.A               | N    | 52.89  | 3372.6226 | 29     | 7.4  | 844.1691  | 4 | 37.85 | 13       | F13:1914 | OB5940 H1 raw.raw | 5.2564E7        | 2        | 2                   | 415   | 443 | Carbamidomethylation; Deamidation (NQ) | C13:Carbamidomethylation:1000.00;N27:Deamidation (NQ):61.84                                                 | PEAKS DB  |
| K.HADADNILVIQQGQ(+.98)ATVTVANGNNRK.S                          | N    | 52.87  | 2747.3950 | 26     | 5.1  | 916.8103  | 3 | 44.47 | 12       | F12:2283 | OB5939 H1 raw.raw | 1.466E5         | 1        | 1                   | 223   | 248 |                                        | Q14:Deamidation (NQ):14.04                                                                                  | PEAKS DB  |
| K.NPQLQDLDM(+15.99)M(+15.99)LTC(+57.02)VEIKEGALMLPHFNSK.A     | N    | 52.70  | 3403.6284 | 29     | -4.3 | 1135.5452 | 3 | 35.63 | 14       | F14:1818 | OB5941 H1 raw.raw | 1.9434E6        | 2        | 2                   | 415   | 443 | Oxidation (M); Carbamidomethylation    | M9:Oxidation (M):49.75;M10:Oxidation (M):51.99;C13:Carbamidomethylation:1000.00                             | PEAKS DB  |
| L.DEGHALR.I                                                   | N    | 52.68  | 796.3828  | 7      | 2.3  | 399.1996  | 2 | 27.87 | 12       | F12:1309 | OB5939 H1 raw.raw | 2.418E4         | 1        | 1                   | 253   | 259 |                                        |                                                                                                             | PEAKS DB  |
| K.DLAFIGSGEQVEK(+57.02)LIK.N                                  | N    | 52.57  | 1786.9464 | 16     | -3.8 | 894.4771  | 2 | 32.91 | 14       | F14:1654 | OB5941 H1 raw.raw | 6.7177E5        | 1        | 1                   | 555   | 570 |                                        | K13:Carbamidomethylation (DHKE, X@N-term):27.96                                                             | PEAKS PTM |
| K.KN(+.98)PQLQDLDM(+15.99)LTC(+57.02)VEIK.E                   | N    | 52.31  | 2192.0527 | 18     | 9.2  | 1097.0437 | 2 | 32.33 | 13       | F13:1621 | OB5940 H1 raw.raw | 8.5775E4        | 1        | 1                   | 414   | 431 | Carbamidomethylation                   | N2:Deamidation (NQ):14.04;M11:Oxidation (M):0.00;C14:Carbamidomethylation:1000.00                           | PEAKS DB  |
| Q.GQATVTVANGNNRK.S                                            | N    | 51.97  | 1428.7433 | 14     | -0.2 | 715.3788  | 2 | 29.02 | 14       | F14:1412 | OB5941 H1 raw.raw | 1.2099E5        | 2        | 2                   | 235   | 248 |                                        |                                                                                                             | PEAKS DB  |
| K.EGALMLPH(+14.02)FNSK.A                                      | N    | 51.73  | 1356.6860 | 12     | 1.3  | 679.3512  | 2 | 30.49 | 14       | F14:1499 | OB5941 H1 raw.raw | 2.5741E4        | 1        | 1                   | 432   | 443 | Methylation(others)                    | H8:Methylation(others):53.53                                                                                | PEAKS PTM |
| K.N(+.98)PQLQ(+.98)DLDMMLTC(+57.02)VEIKEGALM(+15.99)LPHFNSK.A | N    | 51.60  | 3389.6016 | 29     | 9.0  | 848.4153  | 4 | 36.92 | 12       | F12:1868 | OB5939 H1 raw.raw | 2.6873E6        | 1        | 1                   | 415   | 443 | Carbamidomethylation                   | N1:Deamidation (NQ):0.00;Q5:Deamidation (NQ):14.04;C13:Carbamidomethylation:1000.00;M22:Oxidation (M):18.84 | PEAKS DB  |
| total 219 peptides                                            |      |        |           |        |      |           |   |       |          |          |                   |                 |          |                     |       |     |                                        |                                                                                                             |           |

| Peptide                                                       | Uniq | -10lgP | Mass      | Length | ppm  | m/z       | z | RT    | Fraction | Scan     | Source File       | Area Raw in gel | #Feature | #Feature Raw in gel | Start | End | PTM                                 | AScore                                                                                                        | Found By  |
|---------------------------------------------------------------|------|--------|-----------|--------|------|-----------|---|-------|----------|----------|-------------------|-----------------|----------|---------------------|-------|-----|-------------------------------------|---------------------------------------------------------------------------------------------------------------|-----------|
| R.LFEVKPKKK.N                                                 | N    | 50.85  | 1102.6385 | 9      | 1.1  | 552.3271  | 2 | 24.94 | 14       | F14:1179 | OB5941 H1 raw.raw | 2.3081E5        | 2        | 2                   | 406   | 414 |                                     |                                                                                                               | PEAKS DB  |
| R.RVLLEENAGGEQEERGQR.R                                        | N    | 50.67  | 2069.0249 | 18     | 2.1  | 690.6837  | 3 | 24.88 | 13       | F13:1165 | OB5940 H1 raw.raw | 2.7227E5        | 1        | 1                   | 328   | 345 |                                     |                                                                                                               | PEAKS DB  |
| K.N(+.98)PQLQDLDMMLTC(+57.02)VEIKEGALM(+15.99)LPHFNSK.A       | N    | 50.17  | 3388.6174 | 29     | -2.4 | 1130.5437 | 3 | 36.35 | 13       | F13:1874 | OB5940 H1 raw.raw | 8.9006E5        | 1        | 1                   | 415   | 443 | Carbamidomethylation; Oxidation (M) | N1:Deamidation (NQ): 0.00;C13:Carbamidomethylation: 1000.00;M22:Oxidation (M):54.40                           | PEAKS DB  |
| K.NPQLQDLDMM(+15.99)LTC(+57.02)VEIKEGALM(+15.99)LPHFNSK.A     | N    | 48.97  | 3403.6284 | 29     | 2.7  | 1135.5531 | 3 | 35.09 | 14       | F14:1786 | OB5941 H1 raw.raw | 3.2001E5        | 1        | 1                   | 415   | 443 | Carbamidomethylation                | M10:Oxidation (M):12.28;C13:Carbamidomethylation:1000.00;M22:Oxidation (M):28.29                              | PEAKS DB  |
| R.EQEWEEEEEEEEEGSNREVRR.Y                                     | N    | 48.85  | 2821.1545 | 22     | 1.8  | 941.3939  | 3 | 26.75 | 12       | F12:1227 | OB5939 H1 raw.raw | 3.3887E6        | 3        | 3                   | 473   | 494 |                                     |                                                                                                               | PEAKS DB  |
| K.KN(+.98)PQLQDLDMMLTC(+57.02)VEIKEGALMLPHFNSK.A              | N    | 48.84  | 3500.7175 | 30     | 7.1  | 876.1929  | 4 | 36.26 | 13       | F13:1847 | OB5940 H1 raw.raw | 2.2113E6        | 1        | 1                   | 414   | 443 | Carbamidomethylation                | N2:Deamidation (NQ): 0.00;C14:Carbamidomethylation: 1000.00                                                   | PEAKS DB  |
| R.IFLAGDKDNVIDQIEK(+57.02)QAK.D                               | N    | 48.82  | 2201.1692 | 19     | 2.7  | 734.7323  | 3 | 32.55 | 12       | F12:1581 | OB5939 H1 raw.raw | 3.2958E6        | 1        | 1                   | 536   | 554 |                                     | K16:Carbamidomethylation (DHKE, X@N-term):15.91                                                               | PEAKS PTM |
| R.EREEDWRQPR.E                                                | N    | 48.49  | 1399.6592 | 10     | 0.1  | 467.5604  | 3 | 24.77 | 14       | F14:1154 | OB5941 H1 raw.raw | 2.5247E4        | 1        | 1                   | 118   | 127 |                                     |                                                                                                               | PEAKS DB  |
| R.KSFN(+.98)LDEGHALRIPSGFISYILNR.H                            | N    | 47.51  | 2747.4395 | 24     | 4.5  | 687.8702  | 4 | 36.15 | 14       | F14:1837 | OB5941 H1 raw.raw | 1.0524E6        | 1        | 1                   | 248   | 271 |                                     | N4:Deamidation (NQ): 23.98                                                                                    | PEAKS DB  |
| R.LFEVKPKKKN(+.98)PQLQDLDMMLTC(+57.02)VEIK.E                  | N    | 47.32  | 3132.5908 | 26     | 9.3  | 1567.3173 | 2 | 34.35 | 14       | F14:1745 | OB5941 H1 raw.raw | 1.9315E5        | 1        | 1                   | 406   | 431 | Carbamidomethylation                | N10:Deamidation (NQ):14.04;C22:Carbamidomethylation:1000.00                                                   | PEAKS DB  |
| K.N(+.98)PQ(+.98)LQDLDMMLTC(+57.02)VEIKEGALM(+15.99)LPHFNSK.A | N    | 46.82  | 3389.6016 | 29     | 9.0  | 848.4153  | 4 | 36.92 | 12       | F12:1851 | OB5939 H1 raw.raw | 7.3613E6        | 2        | 2                   | 415   | 443 | Carbamidomethylation                | N1:Deamidation (NQ): 11.12;Q3:Deamidation (NQ):0.00;C13:Carbamidomethylation:1000.00;M22:Oxidation (M): 24.93 | PEAKS DB  |
| W.GTPGSEVREETSR.N                                             | Y    | 46.79  | 1403.6641 | 13     | 3.5  | 702.8417  | 2 | 27.60 | 14       | F14:1327 | OB5941 H1 raw.raw | 5.9917E4        | 1        | 1                   | 153   | 165 |                                     |                                                                                                               | PEAKS DB  |
| N.PQLQDLDMMLTC(+57.02)VEIKEGALMLPHFNSK.A                      | N    | 46.63  | 3257.5957 | 28     | 0.9  | 815.4069  | 4 | 37.83 | 14       | F14:1952 | OB5941 H1 raw.raw | 2.3692E5        | 1        | 1                   | 416   | 443 | Carbamidomethylation                | C12:Carbamidomethylation:1000.00                                                                              | PEAKS DB  |
| K.Q(-17.03)AKDLAFPGSGEQVEK.L                                  | N    | 46.49  | 1685.8260 | 16     | 0.9  | 843.9211  | 2 | 29.97 | 12       | F12:1427 | OB5939 H1 raw.raw | 0               | 0        | 0                   | 552   | 567 | Pyro-glu from Q                     | Q1:Pyro-glu from Q:1000.00                                                                                    | PEAKS PTM |
| K.SFN(+.98)LDEGHALRIPSGFISYILNRHDNQNLR.V                      | N    | 46.45  | 3496.7600 | 30     | -3.9 | 700.3566  | 5 | 36.38 | 12       | F12:1849 | OB5939 H1 raw.raw | 6.986E5         | 1        | 1                   | 249   | 278 |                                     | N3:Deamidation (NQ): 20.27                                                                                    | PEAKS DB  |
| total 219 peptides                                            |      |        |           |        |      |           |   |       |          |          |                   |                 |          |                     |       |     |                                     |                                                                                                               |           |

| Peptide                                          | Uniq | -10lgP | Mass      | Length | ppm  | m/z       | z | RT    | Fraction | Scan     | Source File        | Area Raw in gel | #Feature | #Feature Raw in gel | Start | End | PTM                                   | AScore                                                       | Found By  |
|--------------------------------------------------|------|--------|-----------|--------|------|-----------|---|-------|----------|----------|--------------------|-----------------|----------|---------------------|-------|-----|---------------------------------------|--------------------------------------------------------------|-----------|
| R.REQ(+.98)EWEEEEEEEEEESNR.E                     | N    | 45.55  | 2437.9265 | 19     | 7.6  | 813.6556  | 3 | 26.55 | 12       | F12:1226 | OB5939 H1 raw.raw  | 4.2319E4        | 1        | 1                   | 472   | 490 |                                       | Q3:Deamidation (NQ): 42.90                                   | PEAKS DB  |
| T.PQGFEFFPASSR.D                                 | N    | 45.25  | 1483.6731 | 13     | -1.3 | 742.8429  | 2 | 40.34 | 13       | F13:2103 | OB5940 H1 raw.raw  | 4.0298E3        | 1        | 1                   | 289   | 301 |                                       |                                                              | PEAKS DB  |
| R.IPSGFISYILN(+.98)RHDNQNL.R.V                   | N    | 45.21  | 2257.1604 | 19     | 9.9  | 753.4015  | 3 | 37.61 | 2        | F2:1698  | OB5925 H3B raw.raw | 2.0603E6        | 2        | 2                   | 260   | 278 |                                       | N11:Deamidation (NQ):33.06                                   | PEAKS DB  |
| T.PGSEVREETSR.N                                  | Y    | 45.10  | 1245.5948 | 11     | 1.9  | 623.8059  | 2 | 27.69 | 12       | F12:1287 | OB5939 H1 raw.raw  | 4.1909E4        | 1        | 1                   | 155   | 165 |                                       |                                                              | PEAKS DB  |
| N.NPFYFPSRR.F                                    | N    | 45.02  | 1182.5934 | 9      | 1.6  | 395.2057  | 3 | 28.08 | 13       | F13:1358 | OB5940 H1 raw.raw  | 2.9991E4        | 1        | 1                   | 167   | 175 |                                       |                                                              | PEAKS DB  |
| R.DQS(-18.01)SYLQGF.SR.N                         | N    | 44.90  | 1268.5785 | 11     | 7.0  | 635.3010  | 2 | 30.87 | 12       | F12:1484 | OB5939 H1 raw.raw  | 0               | 0        | 0                   | 302   | 312 |                                       | S3:Dehydration:33.98                                         | PEAKS PTM |
| K.GTGNLELVARKEQQR.G                              | N    | 44.58  | 1925.0442 | 17     | 0.6  | 642.6890  | 3 | 25.89 | 14       | F14:1220 | OB5941 H1 raw.raw  | 1.1112E5        | 2        | 2                   | 453   | 469 |                                       |                                                              | PEAKS DB  |
| R.EDWRRPSHQPR.K                                  | N    | 43.98  | 1590.7764 | 12     | -0.3 | 398.7012  | 4 | 24.94 | 14       | F14:1169 | OB5941 H1 raw.raw  | 1.0819E4        | 1        | 1                   | 128   | 139 |                                       |                                                              | PEAKS DB  |
| R.IVQIEARPNTLVLPK(+57.02).H                      | Y    | 43.35  | 1747.0355 | 15     | -2.4 | 874.5229  | 2 | 30.35 | 13       | F13:1460 | OB5940 H1 raw.raw  | 8.446E6         | 1        | 1                   | 208   | 222 | Carbamidomethylation (DHKE, X@N-term) | K15:Carbamidomethylation (DHKE, X@N-term):110.46             | PEAKS PTM |
| R.VLLE(+21.98)ENAGGEQEER.G                       | N    | 42.61  | 1593.7246 | 14     | -0.7 | 797.8690  | 2 | 26.03 | 13       | F13:1239 | OB5940 H1 raw.raw  | 1.373E5         | 3        | 3                   | 329   | 342 |                                       | E4:Sodium adduct:40.00                                       | PEAKS PTM |
| K.HADADN.LVIQ(+.98)QGQATVTVANGNNRK.S             | N    | 42.22  | 2747.3950 | 26     | 5.9  | 916.8110  | 3 | 45.04 | 14       | F14:2357 | OB5941 H1 raw.raw  | 0               | 0        | 0                   | 223   | 248 |                                       | Q11:Deamidation (NQ):9.34                                    | PEAKS DB  |
| K.IRPEGREGQE.WGT.PGSEVR.E                        | Y    | 42.02  | 2268.0881 | 20     | 1.1  | 757.0375  | 3 | 26.28 | 14       | F14:1248 | OB5941 H1 raw.raw  | 5.4096E4        | 1        | 1                   | 141   | 160 |                                       |                                                              | PEAKS DB  |
| K.HADADN.LVIQ.QGQAT(-18.01)VTVAN(+.98)GNNRK.S    | N    | 41.92  | 2729.3845 | 26     | 0.3  | 683.3536  | 4 | 28.96 | 13       | F13:1411 | OB5940 H1 raw.raw  | 3.5545E5        | 1        | 1                   | 223   | 248 |                                       | T16:Dehydration:8.22; N21:Deamidation (NQ):6.08              | PEAKS PTM |
| K.HADADN(+.98)ILVIQ.QGQATVTVANGNNRK.S            | N    | 41.76  | 2747.3950 | 26     | 3.7  | 916.8090  | 3 | 50.62 | 12       | F12:2616 | OB5939 H1 raw.raw  | 1.1355E5        | 2        | 2                   | 223   | 248 |                                       | N6:Deamidation (NQ): 42.57                                   | PEAKS DB  |
| K.ISMPVN(+.98)TPGQFEFFPASSR.D                    | N    | 41.75  | 2227.0254 | 20     | 9.3  | 1114.5303 | 2 | 58.23 | 14       | F14:3138 | OB5941 H1 raw.raw  | 2.4983E4        | 1        | 1                   | 282   | 301 |                                       | N6:Deamidation (NQ): 42.89                                   | PEAKS DB  |
| M.LPHFNSK.A                                      | N    | 41.73  | 841.4446  | 7      | -3.4 | 421.7281  | 2 | 30.24 | 14       | F14:1484 | OB5941 H1 raw.raw  | 1.8069E6        | 2        | 2                   | 437   | 443 |                                       |                                                              | PEAKS DB  |
| R.PNTLVLPK.H                                     | N    | 41.66  | 880.5382  | 8      | 0.4  | 441.2766  | 2 | 27.53 | 13       | F13:1313 | OB5940 H1 raw.raw  | 8.5249E4        | 1        | 1                   | 215   | 222 |                                       |                                                              | PEAKS DB  |
| N.TLEAAFN.AEFNEIRR.V                             | N    | 41.51  | 1779.8904 | 15     | -3.0 | 890.9498  | 2 | 32.91 | 14       | F14:1655 | OB5941 H1 raw.raw  | 4.1608E5        | 1        | 1                   | 314   | 328 |                                       |                                                              | PEAKS DB  |
| K.KGSEEDITN(-17.03)PINLR.D                       | N    | 41.49  | 1696.8268 | 15     | 3.3  | 566.6180  | 3 | 28.85 | 14       | F14:1397 | OB5941 H1 raw.raw  | 2.3089E5        | 1        | 1                   | 379   | 393 |                                       | N10:Ammonia-loss (N):40.63                                   | PEAKS PTM |
| K.KNPQLQ(+.98)DLDMMLTC(+57.02)VEIKEGALMLPHFNSK.A | N    | 40.89  | 3500.7175 | 30     | 0.4  | 1167.9136 | 3 | 36.34 | 13       | F13:1850 | OB5940 H1 raw.raw  | 4.7608E5        | 1        | 1                   | 414   | 443 | Carbamidomethylation                  | Q6:Deamidation (NQ): 14.04; C14:Carbamidomethylation:1000.00 | PEAKS DB  |
| R.REQEWEEEEEEEEGSNREVR.R                         | N    | 40.76  | 2821.1545 | 22     | 3.9  | 941.3958  | 3 | 26.47 | 14       | F14:1247 | OB5941 H1 raw.raw  | 1.8468E6        | 1        | 1                   | 472   | 493 |                                       |                                                              | PEAKS DB  |
| total 219 peptides                               |      |        |           |        |      |           |   |       |          |          |                    |                 |          |                     |       |     |                                       |                                                              |           |



| Peptide                                        | Uniq | -10lgP | Mass      | Length | ppm  | m/z       | z | RT    | Fraction | Scan     | Source File       | Area Raw in gel | #Feature | #Feature Raw in gel | Start | End | PTM                                 | AScore                                                                                | Found By  |
|------------------------------------------------|------|--------|-----------|--------|------|-----------|---|-------|----------|----------|-------------------|-----------------|----------|---------------------|-------|-----|-------------------------------------|---------------------------------------------------------------------------------------|-----------|
| R.NTLEAAFN(+.98)AEFNEIRR.V                     | N    | 40.23  | 1894.9172 | 16     | -0.3 | 948.4656  | 2 | 32.92 | 12       | F12:1570 | OB5939 H1 raw.raw | 1.5322E6        | 1        | 1                   | 313   | 328 |                                     | N8:Deamidation (NQ): 8.26                                                             | PEAKS DB  |
| K.NPQLQLDLM(+15.99)M(+15.99)LTC(+57.02)VEIK.E  | N    | 39.57  | 2078.9688 | 17     | 1.1  | 1040.4928 | 2 | 33.80 | 14       | F14:1701 | OB5941 H1 raw.raw | 0               | 0        | 0                   | 415   | 431 | Oxidation (M); Carbamidomethylation | M9:Oxidation (M):100.0.00;M10:Oxidation (M):1000.00;C13:Carbamidomethylation:100.0.00 | PEAKS DB  |
| R.IPS(+59.02)GFISYILNR.H                       | N    | 39.40  | 1437.7802 | 12     | 1.5  | 719.8984  | 2 | 36.96 | 12       | F12:1870 | OB5939 H1 raw.raw | 4.3694E5        | 1        | 1                   | 260   | 271 |                                     | S3:Aminoethylcysteine:49.79                                                           | PEAKS PTM |
| K.HADADNILVIQQ(-18.01).G                       | N    | 38.68  | 1317.6677 | 12     | -4.9 | 659.8379  | 2 | 29.56 | 14       | F14:1421 | OB5941 H1 raw.raw | 1.6968E5        | 2        | 2                   | 223   | 234 | Dehydration                         | Q12:Dehydration:76.18                                                                 | PEAKS PTM |
| K.AMVIVVVK(-1.03)GTGNLELVAVR.K                 | N    | 37.92  | 2080.1714 | 20     | 4.3  | 1041.0974 | 2 | 33.79 | 13       | F13:1738 | OB5940 H1 raw.raw | 2.1453E7        | 1        | 1                   | 444   | 463 | Lysine oxidation to aminoaldehyde   | K9:Lysine oxidation to aminoaldehyde:1000.00                                          | PEAKS PTM |
| I.PSGFISYILNRHDNQNL.R                          | N    | 37.07  | 2143.0923 | 18     | 4.0  | 715.3742  | 3 | 33.53 | 12       | F12:1645 | OB5939 H1 raw.raw | 0               | 0        | 0                   | 261   | 278 |                                     |                                                                                       | PEAKS DB  |
| K.EGALM(-48.00)LPHFNSK.A                       | N    | 36.97  | 1294.6670 | 12     | 2.0  | 432.5638  | 3 | 28.31 | 14       | F14:1348 | OB5941 H1 raw.raw | 1.3683E6        | 1        | 1                   | 432   | 443 | Dethiomethyl                        | M5:Dethiomethyl:100.0.00                                                              | PEAKS PTM |
| R.IFLAGDKDNVIDQ(+.98)IEK.Q                     | N    | 36.27  | 1817.9410 | 16     | 7.9  | 606.9924  | 3 | 63.32 | 14       | F14:3434 | OB5941 H1 raw.raw | 1.3413E4        | 1        | 1                   | 536   | 551 |                                     | Q13:Deamidation (NQ):25.70                                                            | PEAKS DB  |
| K.HAD(+57.02)ADNILVIQQGQATVTVANGN(+.98)NRK.S   | N    | 35.92  | 2804.4165 | 26     | -3.8 | 702.1088  | 4 | 28.95 | 13       | F13:1413 | OB5940 H1 raw.raw | 2.7833E5        | 1        | 1                   | 223   | 248 |                                     | D3:Carbamidomethylation (DHKE, X@N-term):4.64;N23:Deamidation (NQ):0.00               | PEAKS PTM |
| K.NPQ(+.98)LQLDMLLTC(+57.02)VEIKEGALMLPHFNSK.A | N    | 35.84  | 3372.6226 | 29     | 9.4  | 1125.2253 | 3 | 40.73 | 12       | F12:2064 | OB5939 H1 raw.raw | 5.6313E5        | 1        | 1                   | 415   | 443 | Carbamidomethylation                | Q3:Deamidation (NQ): 0.00;C13:Carbamidomethylation: 1000.00                           | PEAKS DB  |
| K.ISM(+15.99)PVNTPGQ(+.98)FEDFFPASSR.D         | N    | 35.67  | 2243.0205 | 20     | 6.2  | 1122.5245 | 2 | 50.73 | 12       | F12:2643 | OB5939 H1 raw.raw | 0               | 0        | 0                   | 282   | 301 | Oxidation (M)                       | M3:Oxidation (M):100.0.00;Q10:Deamidation (NQ):22.37                                  | PEAKS DB  |
| K.GT(-18.01)GNLELVAVRK.E                       | N    | 35.64  | 1237.7142 | 12     | 0.9  | 413.5790  | 3 | 26.41 | 13       | F13:1259 | OB5940 H1 raw.raw | 7.4255E5        | 3        | 3                   | 453   | 464 | Dehydration                         | T2:Dehydration:1000.00                                                                | PEAKS PTM |
| K.SFNLDEGHALRIPS.G                             | N    | 35.38  | 1554.7791 | 14     | -4.8 | 778.3931  | 2 | 30.79 | 13       | F13:1515 | OB5940 H1 raw.raw | 5.2113E3        | 1        | 1                   | 249   | 262 |                                     |                                                                                       | PEAKS DB  |
| R.DQ(+.98)SSYLQGFSSR.N                         | N    | 34.61  | 1287.5731 | 11     | -3.2 | 644.7917  | 2 | 63.83 | 14       | F14:3449 | OB5941 H1 raw.raw | 0               | 0        | 0                   | 302   | 312 |                                     | Q2:Deamidation (NQ): 41.87                                                            | PEAKS DB  |
| R.S(+57.02)SDNEGVIVK.V                         | N    | 34.54  | 1103.5459 | 10     | 0.3  | 552.7804  | 2 | 23.19 | 13       | F13:1066 | OB5940 H1 raw.raw | 0               | 0        | 0                   | 351   | 360 |                                     | S1:Carbamidomethylation (DHKE, X@N-term):11.10                                        | PEAKS PTM |
| Q.IEARPNTLVLPK.H                               | Y    | 34.19  | 1349.8030 | 12     | 2.2  | 675.9103  | 2 | 30.40 | 12       | F12:1461 | OB5939 H1 raw.raw | 1.011E6         | 3        | 3                   | 211   | 222 |                                     |                                                                                       | PEAKS DB  |
| R.NN(-17.03)PFYFSSRR.F                         | N    | 34.10  | 1279.6097 | 10     | -0.4 | 427.5437  | 3 | 28.25 | 13       | F13:1369 | OB5940 H1 raw.raw | 1.47E5          | 1        | 1                   | 166   | 175 |                                     | N2:Ammonia-loss (N): 12.28                                                            | PEAKS PTM |
| total 219 peptides                             |      |        |           |        |      |           |   |       |          |          |                   |                 |          |                     |       |     |                                     |                                                                                       |           |

| Peptide                                                              | Uniq | -10lgP | Mass      | Length | ppm  | m/z       | z | RT    | Fraction | Scan     | Source File       | Area Raw in gel | #Feature | #Feature Raw in gel | Start | End | PTM                                    | AScore                                                                                                                                      | Found By  |
|----------------------------------------------------------------------|------|--------|-----------|--------|------|-----------|---|-------|----------|----------|-------------------|-----------------|----------|---------------------|-------|-----|----------------------------------------|---------------------------------------------------------------------------------------------------------------------------------------------|-----------|
| T.G(+214.97)NLELVAVRK.E                                              | N    | 33.47  | 1312.6267 | 10     | 2.3  | 657.3221  | 2 | 27.95 | 14       | F14:1280 | OB5941 H1 raw.raw | 2.4669E5        | 1        | 1                   | 455   | 464 | 4-sulfophenyl isothiocyanate           | G1:4-sulfophenyl isothiocyanate:144.45                                                                                                      | PEAKS PTM |
| K.HADADNILVIQQ(+.98)GQATVTVANGNN(+.98)RK.S                           | N    | 33.28  | 2748.3792 | 26     | 7.6  | 917.1406  | 3 | 48.20 | 12       | F12:2471 | OB5939 H1 raw.raw | 2.0672E4        | 1        | 1                   | 223   | 248 |                                        | Q12:Deamidation (N Q):23.10;N 24:Deamidation (NQ):0.00                                                                                      | PEAKS DB  |
| K.HADAD(-18.01)NILVIQQGQATVTVANGNNRK.S                               | N    | 33.25  | 2728.4004 | 26     | 3.5  | 910.4772  | 3 | 28.70 | 13       | F13:1390 | OB5940 H1 raw.raw | 0               | 0        | 0                   | 223   | 248 |                                        | D5:Dehydration:30.36                                                                                                                        | PEAKS PTM |
| K.ISM(+15.99)PVN(+.98)TPGQFEDFFPASSR.D                               | N    | 33.05  | 2243.0205 | 20     | 7.6  | 1122.5260 | 2 | 49.72 | 13       | F13:2625 | OB5940 H1 raw.raw | 0               | 0        | 0                   | 282   | 301 | Oxidation (M)                          | M3:Oxidation (M):100 0.00;N6:Deamidation (NQ):25.70                                                                                         | PEAKS DB  |
| R.IFLAGDK(+26.02)DNVIDQIEK.Q                                         | N    | 32.97  | 1842.9727 | 16     | -0.2 | 922.4934  | 2 | 35.63 | 14       | F14:1844 | OB5941 H1 raw.raw | 1.4466E5        | 1        | 1                   | 536   | 551 | Acetaldehyde +26                       | K7:Acetaldehyde +26:74.34                                                                                                                   | PEAKS PTM |
| K.NPQLQ(+.98)DLDMM(+15.99)LTC(+57.02)VEIK.E                          | N    | 32.85  | 2063.9578 | 17     | -3.4 | 1032.9827 | 2 | 37.19 | 12       | F12:1881 | OB5939 H1 raw.raw | 2.2954E4        | 1        | 1                   | 415   | 431 | Carbamidomethylation                   | Q5:Deamidation (NQ):26.31;M10:Oxidation (M):0.00;C 13:Carbamidomethylation:1000.00                                                          | PEAKS DB  |
| K.HADADNILVIQ(+.98)QGQ(+.98)ATVTVANGNNRK.S                           | N    | 32.62  | 2748.3792 | 26     | 3.1  | 917.1365  | 3 | 57.24 | 13       | F13:3064 | OB5940 H1 raw.raw | 0               | 0        | 0                   | 223   | 248 |                                        | Q11:Deamidation (N Q):0.00;Q1 4:Deamidation (NQ):0.00                                                                                       | PEAKS DB  |
| K.N(+.98)PQ(+.98)LQ(+.98)DLDMM(+15.99)LTC(+57.02)VEIKEGALMLPHFNSK.A  | N    | 32.23  | 3390.5854 | 29     | 3.7  | 848.6568  | 4 | 38.47 | 14       | F14:1982 | OB5941 H1 raw.raw | 0               | 0        | 0                   | 415   | 443 | Deamidation (NQ); Carbamidomethylation | N1:Deamidation (NQ):62.42;Q3:Deamidation (NQ):65.9 2;Q5:Deamidation (N Q):60.92;M 10:Oxidation (M):12.2 8;C13:Carbamidomethylation:100 0.00 | PEAKS DB  |
| R.EGEQEWGT(-18.01)PGSEVREETSR.N                                      | Y    | 32.15  | 2143.9407 | 19     | 2.2  | 1072.9800 | 2 | 27.69 | 12       | F12:1293 | OB5939 H1 raw.raw | 4.1679E4        | 1        | 1                   | 147   | 165 |                                        | T8:Dehydration:20.70                                                                                                                        | PEAKS PTM |
| K.KN(+.98)PQ(+.98)LQ(+.98)DLDM(+15.99)MLTC(+57.02)VEIKEGALMLPHFNSK.A | N    | 31.81  | 3518.6804 | 30     | -3.0 | 880.6747  | 4 | 37.45 | 12       | F12:1882 | OB5939 H1 raw.raw | 0               | 0        | 0                   | 414   | 443 | Deamidation (NQ); Carbamidomethylation | N2:Deamidation (NQ):58.75;Q4:Deamidation (NQ):61.6 5;Q6:Deamidation (N Q):53.75;M 10:Oxidation (M):0.00; C14:Carbamidomethylation:1000.00   | PEAKS DB  |
| total 219 peptides                                                   |      |        |           |        |      |           |   |       |          |          |                   |                 |          |                     |       |     |                                        |                                                                                                                                             |           |

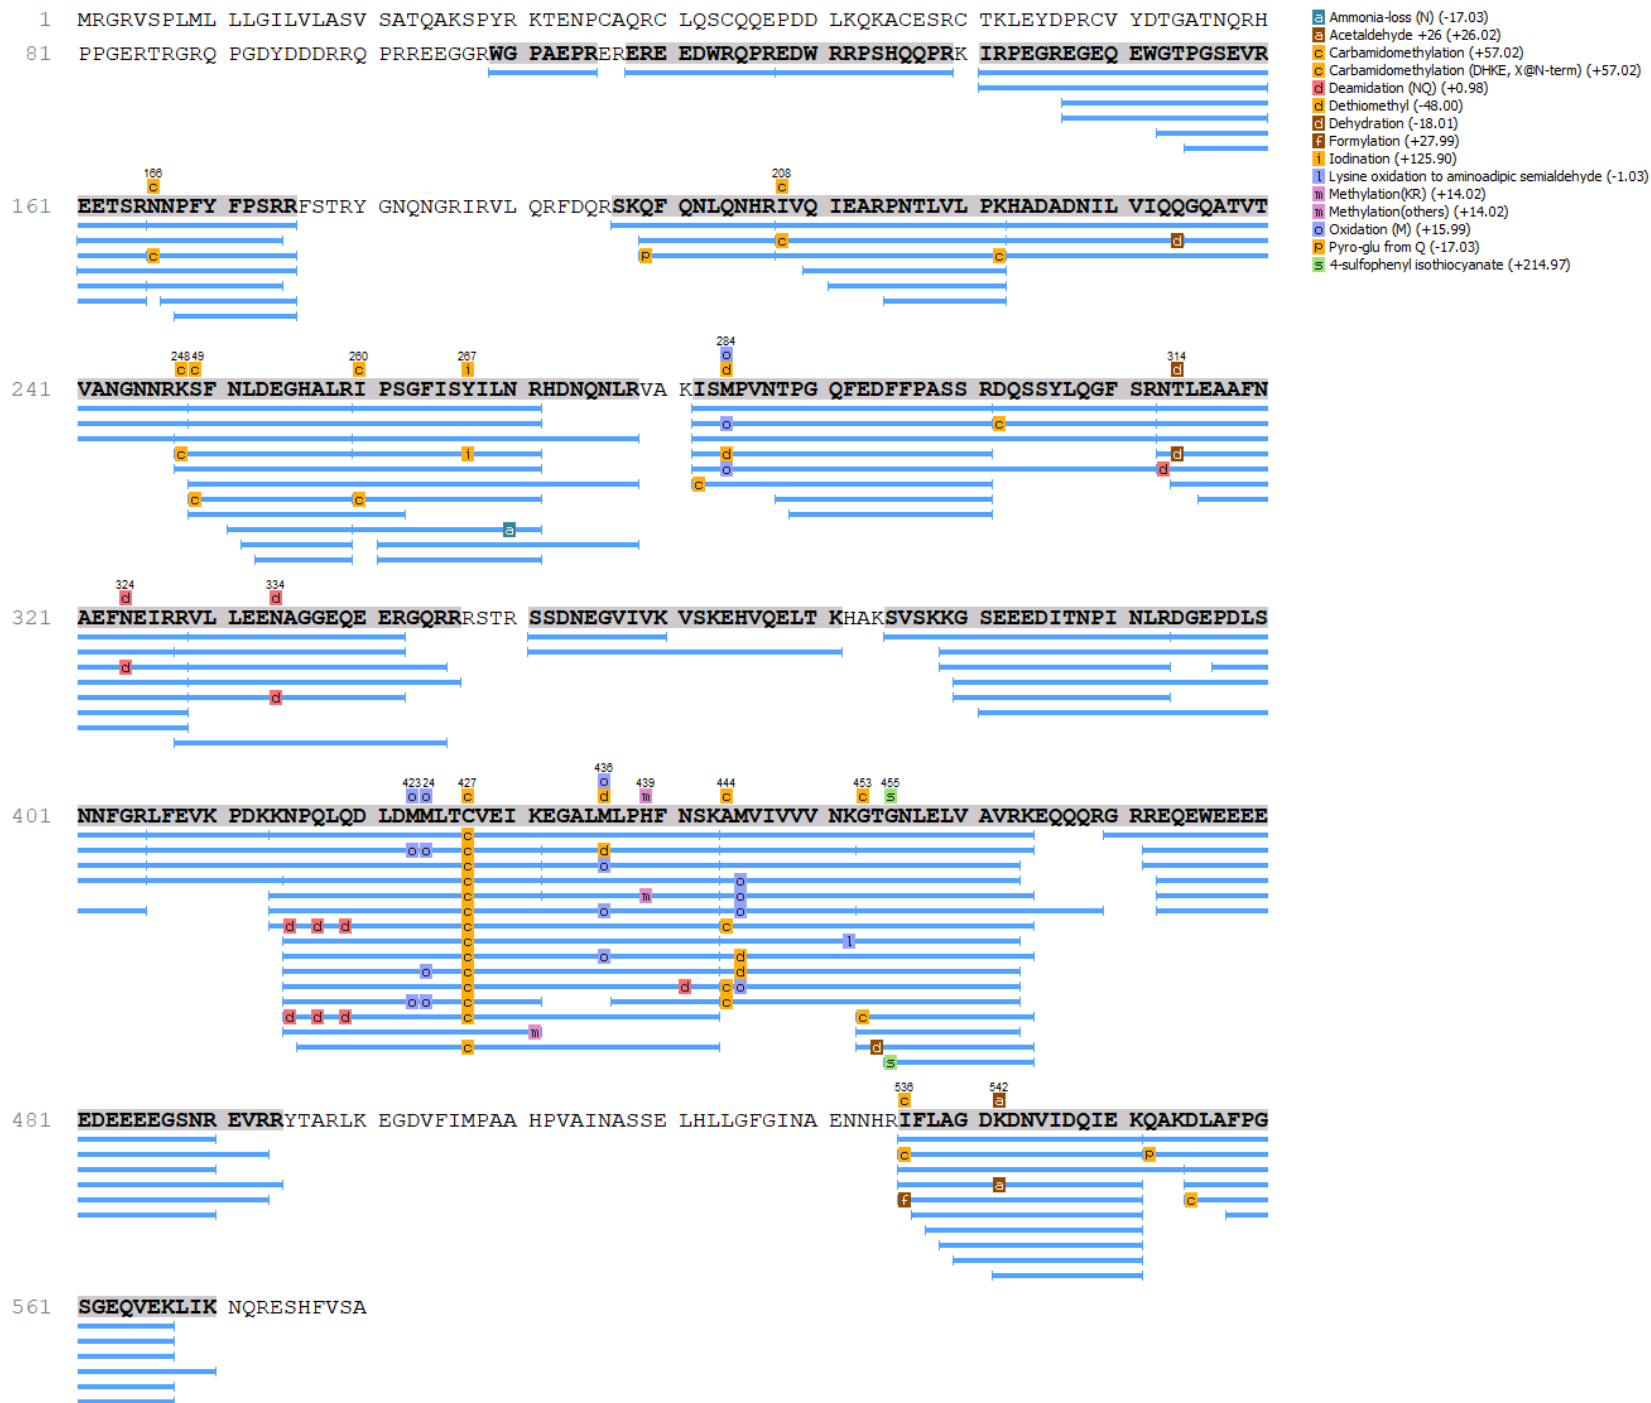

Supporting Peptides:

| Peptide                                  | Uniq | -10lgP | Mass      | Length | ppm  | m/z       | z | RT    | Fraction | Scan     | Source File        | Area Raw in gel | #Feature | #Feature Raw in gel | Start | End | PTM                  | AScore                                                  | Found By |
|------------------------------------------|------|--------|-----------|--------|------|-----------|---|-------|----------|----------|--------------------|-----------------|----------|---------------------|-------|-----|----------------------|---------------------------------------------------------|----------|
| K.HADADNILVIQQGQATVTVAN(+.98)GNNRK.S     | N    | 140.09 | 2747.3950 | 26     | -1.1 | 916.8046  | 3 | 29.38 | 14       | F14:1509 | OB5941 H1 raw.raw  | 3.7837E8        | 20       | 20                  | 223   | 248 |                      | N21:Deamidation (NQ):26.31                              | PEAKS DB |
| K.KNPQLQDLDMMLTC(+57.02)VEIK.E           | N    | 137.14 | 2175.0737 | 18     | 2.4  | 1088.5468 | 2 | 34.90 | 14       | F14:1774 | OB5941 H1 raw.raw  | 4.1086E6        | 3        | 3                   | 414   | 431 | Carbamidomethylation | C14:Carbamidomethylation:1000.00                        | PEAKS DB |
| K.HADADNILVIQQGQATVTVANGNNR.K            | N    | 135.84 | 2618.3162 | 25     | 2.9  | 1310.1692 | 2 | 30.42 | 14       | F14:1494 | OB5941 H1 raw.raw  | 5.8142E6        | 3        | 3                   | 223   | 247 |                      |                                                         | PEAKS DB |
| K.ISMPVNTPGQFEDFFPASSR.D                 | N    | 135.58 | 2226.0415 | 20     | 1.9  | 1114.0302 | 2 | 35.63 | 14       | F14:1807 | OB5941 H1 raw.raw  | 2.1661E8        | 32       | 26                  | 282   | 301 |                      |                                                         | PEAKS DB |
| K.ISM(+15.99)PVNTPGQFEDFFPASSR.D         | N    | 134.77 | 2242.0364 | 20     | 2.3  | 1122.0281 | 2 | 34.42 | 2        | F2:1522  | OB5925 H3B raw.raw | 1.6845E7        | 19       | 17                  | 282   | 301 | Oxidation (M)        | M3:Oxidation (M):1000.00                                | PEAKS DB |
| K.NPQLQDLDMMLTC(+57.02)VEIK.E            | N    | 131.65 | 2046.9788 | 17     | -0.8 | 1024.4958 | 2 | 36.89 | 14       | F14:1903 | OB5941 H1 raw.raw  | 1.2559E7        | 8        | 8                   | 415   | 431 | Carbamidomethylation | C13:Carbamidomethylation:1000.00                        | PEAKS DB |
| R.EQEWEHEHEHEHEGNSR.E                    | N    | 130.87 | 2280.8413 | 18     | 4.3  | 1141.4329 | 2 | 28.13 | 14       | F14:1352 | OB5941 H1 raw.raw  | 4.0373E6        | 3        | 3                   | 473   | 490 |                      |                                                         | PEAKS DB |
| K.NPQLQDLDM(+15.99)MLTC(+57.02)VEIK.E    | N    | 128.59 | 2062.9736 | 17     | -6.6 | 1032.4873 | 2 | 36.34 | 14       | F14:1860 | OB5941 H1 raw.raw  | 2.4371E5        | 2        | 2                   | 415   | 431 | Carbamidomethylation | M9:Oxidation (M):30.46;C13:Carbamidomethylation:1000.00 | PEAKS DB |
| R.NTLEAFAFNEFR.R                         | N    | 126.11 | 1737.8322 | 15     | 3.3  | 869.9262  | 2 | 35.27 | 14       | F14:1792 | OB5941 H1 raw.raw  | 1.3691E7        | 6        | 6                   | 313   | 327 |                      |                                                         | PEAKS DB |
| K.HADADNILVIQQGQATVTVANGNNRK.S           | N    | 120.98 | 2746.4111 | 26     | 4.7  | 1374.2192 | 2 | 29.02 | 14       | F14:1406 | OB5941 H1 raw.raw  | 4.4412E7        | 13       | 13                  | 223   | 248 |                      |                                                         | PEAKS DB |
| K.SFNLDEGHALRIPSGFISYILNR.H              | N    | 117.92 | 2618.3604 | 23     | 0.6  | 1310.1882 | 2 | 36.89 | 14       | F14:1902 | OB5941 H1 raw.raw  | 2.1092E8        | 40       | 39                  | 249   | 271 |                      |                                                         | PEAKS DB |
| R.VLLEENAGGEQEER.G                       | N    | 114.70 | 1571.7427 | 14     | 1.1  | 786.8795  | 2 | 26.65 | 14       | F14:1250 | OB5941 H1 raw.raw  | 1.2337E7        | 7        | 7                   | 329   | 342 |                      |                                                         | PEAKS DB |
| R.IFLAGDKDNVIDQIEKQAK.D                  | N    | 113.07 | 2144.1477 | 19     | 1.1  | 715.7240  | 3 | 32.93 | 7        | F7:1578  | OB5934 H3B raw.raw | 5.566E7         | 12       | 12                  | 536   | 554 |                      |                                                         | PEAKS DB |
| K.AMVIVVVKGTGNLELVAVR.K                  | N    | 112.17 | 2081.2031 | 20     | 1.5  | 694.7427  | 3 | 34.35 | 14       | F14:1739 | OB5941 H1 raw.raw  | 7.0931E7        | 12       | 12                  | 444   | 463 |                      |                                                         | PEAKS DB |
| R.KSFNLDEGHALR.I                         | N    | 112.03 | 1385.7051 | 12     | 1.1  | 693.8606  | 2 | 25.70 | 14       | F14:1202 | OB5941 H1 raw.raw  | 3.2948E6        | 6        | 6                   | 248   | 259 |                      |                                                         | PEAKS DB |
| R.IPSGFISYILNR.H                         | N    | 111.89 | 1378.7609 | 12     | 1.5  | 690.3887  | 2 | 43.03 | 14       | F14:2242 | OB5941 H1 raw.raw  | 2.1426E8        | 15       | 15                  | 260   | 271 |                      |                                                         | PEAKS DB |
| R.DQSSYLQGFSR.N                          | N    | 110.94 | 1286.5891 | 11     | -1.4 | 644.3009  | 2 | 30.60 | 14       | F14:1505 | OB5941 H1 raw.raw  | 6.2405E7        | 21       | 21                  | 302   | 312 |                      |                                                         | PEAKS DB |
| K.KGSEEDITNPINLR.D                       | N    | 110.67 | 1713.8533 | 15     | 3.2  | 857.9366  | 2 | 28.85 | 14       | F14:1395 | OB5941 H1 raw.raw  | 1.2495E7        | 8        | 8                   | 379   | 393 |                      |                                                         | PEAKS DB |
| K.NPQLQDLDMMLTC(+57.02)VEIKEGALMLPHFSK.A | N    | 110.02 | 3371.6387 | 29     | -0.1 | 1686.8264 | 2 | 37.85 | 14       | F14:1946 | OB5941 H1 raw.raw  | 1.7936E8        | 14       | 14                  | 415   | 443 | Carbamidomethylation | C13:Carbamidomethylation:1000.00                        | PEAKS DB |
| K.AMVIVVVKGTGNLELVAVRK.E                 | N    | 109.98 | 2209.2981 | 21     | -1.4 | 1105.6548 | 2 | 32.55 | 14       | F14:1615 | OB5941 H1 raw.raw  | 2.9136E8        | 18       | 18                  | 444   | 464 |                      |                                                         | PEAKS DB |
| total 219 peptides                       |      |        |           |        |      |           |   |       |          |          |                    |                 |          |                     |       |     |                      |                                                         |          |

| Peptide                                                 | Uniq | -10lgP | Mass      | Length | ppm  | m/z       | z | RT    | Fraction | Scan     | Source File       | Area Raw in gel | #Feature | #Feature Raw in gel | Start | End | PTM                                   | AScore                                           | Found By  |
|---------------------------------------------------------|------|--------|-----------|--------|------|-----------|---|-------|----------|----------|-------------------|-----------------|----------|---------------------|-------|-----|---------------------------------------|--------------------------------------------------|-----------|
| K.AM(+15.99)VIVVVNKG <sup>T</sup> GNLELVAVR.K           | N    | 109.59 | 2097.1980 | 20     | -2.2 | 1049.6040 | 2 | 32.73 | 14       | F14:1638 | OB5941 H1 raw.raw | 3.1537E7        | 10       | 10                  | 444   | 463 | Oxidation (M)                         | M2:Oxidation (M):100.0.00                        | PEAKS DB  |
| K.SFNLDEGHALR.I                                         | N    | 109.41 | 1257.6101 | 11     | -3.3 | 629.8102  | 2 | 27.77 | 14       | F14:1329 | OB5941 H1 raw.raw | 7.2473E7        | 30       | 30                  | 249   | 259 |                                       |                                                  | PEAKS DB  |
| R.IFLAGDKDNVIDQIEK.Q                                    | N    | 108.13 | 1816.9570 | 16     | 0.2  | 909.4860  | 2 | 33.10 | 14       | F14:1683 | OB5941 H1 raw.raw | 7.2865E8        | 41       | 41                  | 536   | 551 |                                       |                                                  | PEAKS DB  |
| R.KSFNLDEGHALRIPSGFISYILNR.H                            | N    | 107.80 | 2746.4553 | 24     | -2.1 | 916.4905  | 3 | 36.16 | 12       | F12:1802 | OB5939 H1 raw.raw | 7.186E6         | 4        | 4                   | 248   | 271 |                                       |                                                  | PEAKS DB  |
| K.GSEEDITNPINLRDGE <sup>P</sup> DL <sup>S</sup> NNFGR.L | N    | 107.18 | 2887.3220 | 26     | -1.7 | 963.4464  | 3 | 32.55 | 14       | F14:1626 | OB5941 H1 raw.raw | 4.5198E7        | 9        | 9                   | 380   | 405 |                                       |                                                  | PEAKS DB  |
| R.EGEQEWGTPGSEVR.E                                      | Y    | 105.02 | 1559.6852 | 14     | -4.9 | 780.8460  | 2 | 27.77 | 14       | F14:1333 | OB5941 H1 raw.raw | 7.2805E5        | 3        | 3                   | 147   | 160 |                                       |                                                  | PEAKS DB  |
| R.I(+57.02)PSGFISYILNR.H                                | N    | 104.65 | 1435.7823 | 12     | -1.7 | 718.8972  | 2 | 36.52 | 14       | F14:1869 | OB5941 H1 raw.raw | 1.3017E7        | 3        | 3                   | 260   | 271 | Carbamidomethylation (DHKE, X@N-term) | I1:Carbamidomethylation (DHKE, X@N-term):1000.00 | PEAKS PTM |
| R.VLLEENAGGEQEERGQR.R                                   | N    | 104.46 | 1912.9238 | 17     | 1.8  | 957.4709  | 2 | 25.31 | 14       | F14:1182 | OB5941 H1 raw.raw | 1.9161E6        | 8        | 8                   | 329   | 345 |                                       |                                                  | PEAKS DB  |
| R.I(+57.02)FLAGDKDNVIDQIEK.Q                            | N    | 103.96 | 1873.9785 | 16     | -5.0 | 937.9919  | 2 | 32.19 | 14       | F14:1619 | OB5941 H1 raw.raw | 4.5184E7        | 7        | 7                   | 536   | 551 | Carbamidomethylation (DHKE, X@N-term) | I1:Carbamidomethylation (DHKE, X@N-term):90.91   | PEAKS PTM |
| R.DGE <sup>P</sup> DL <sup>S</sup> NNFGR.L              | N    | 102.95 | 1319.5742 | 12     | 0.8  | 660.7949  | 2 | 29.02 | 14       | F14:1398 | OB5941 H1 raw.raw | 3.2103E6        | 3        | 3                   | 394   | 405 |                                       |                                                  | PEAKS DB  |
| K.QAKDLAFPGSGEQVEK.L                                    | N    | 102.73 | 1702.8525 | 16     | 1.8  | 852.4351  | 2 | 26.85 | 14       | F14:1278 | OB5941 H1 raw.raw | 1.286E6         | 6        | 6                   | 552   | 567 |                                       |                                                  | PEAKS DB  |
| K.H(+57.02)ADADNILVIQ <sup>Q</sup> GGATVTVANGNNRK.S     | N    | 102.10 | 2803.4324 | 26     | -1.3 | 935.4835  | 3 | 29.92 | 14       | F14:1452 | OB5941 H1 raw.raw | 1.6897E6        | 1        | 1                   | 223   | 248 |                                       | H1:Carbamidomethylation (DHKE, X@N-term):39.76   | PEAKS PTM |
| K.DLAFPGSGEQVEK.L                                       | N    | 101.44 | 1375.6619 | 13     | -2.0 | 688.8369  | 2 | 30.08 | 14       | F14:1472 | OB5941 H1 raw.raw | 6.5563E7        | 9        | 9                   | 555   | 567 |                                       |                                                  | PEAKS DB  |
| K.NPQLQ <sup>L</sup> LD <sup>M</sup> MLTCVEIK(+14.02).E | N    | 101.30 | 2003.9730 | 17     | 2.1  | 1002.9958 | 2 | 38.00 | 14       | F14:1960 | OB5941 H1 raw.raw | 6.7851E5        | 2        | 2                   | 415   | 431 | Methylation(KR)                       | K17:Methylation(KR):1000.00                      | PEAKS PTM |
| K.S(+57.02)FNLDEGHALR.I                                 | N    | 100.96 | 1314.6316 | 11     | 0.8  | 658.3236  | 2 | 27.59 | 14       | F14:1340 | OB5941 H1 raw.raw | 5.6012E6        | 7        | 7                   | 249   | 259 | Carbamidomethylation (DHKE, X@N-term) | S1:Carbamidomethylation (DHKE, X@N-term):101.71  | PEAKS PTM |
| R.RVLLEENAGGEQEER.G                                     | N    | 98.06  | 1727.8438 | 15     | 0.4  | 576.9554  | 3 | 24.77 | 13       | F13:1156 | OB5940 H1 raw.raw | 1.2517E5        | 5        | 5                   | 328   | 342 |                                       |                                                  | PEAKS DB  |
| R.IPSGFISYILNRHD <sup>N</sup> QNL <sup>R</sup> .V       | N    | 97.42  | 2256.1763 | 19     | 0.5  | 565.0516  | 4 | 33.66 | 14       | F14:1693 | OB5941 H1 raw.raw | 3.392E8         | 42       | 42                  | 260   | 278 |                                       |                                                  | PEAKS DB  |
| K.GSEEDITNPINLR.D                                       | N    | 97.01  | 1585.7583 | 14     | 2.4  | 793.8884  | 2 | 30.93 | 14       | F14:1527 | OB5941 H1 raw.raw | 3.0498E6        | 3        | 3                   | 380   | 393 |                                       |                                                  | PEAKS DB  |
| K.AM(+15.99)VIVVVNKG <sup>T</sup> GNLELVAVR.K.E         | N    | 96.33  | 2225.2930 | 21     | -0.4 | 1113.6533 | 2 | 30.76 | 14       | F14:1520 | OB5941 H1 raw.raw | 4.0787E7        | 8        | 7                   | 444   | 464 | Oxidation (M)                         | M2:Oxidation (M):100.0.00                        | PEAKS DB  |
| R.EGEQEWGTPGSEVRETSR.N                                  | Y    | 95.70  | 2161.9512 | 19     | 2.5  | 1081.9856 | 2 | 27.60 | 14       | F14:1311 | OB5941 H1 raw.raw | 2.0479E7        | 9        | 9                   | 147   | 165 |                                       |                                                  | PEAKS DB  |
| total 219 peptides                                      |      |        |           |        |      |           |   |       |          |          |                   |                 |          |                     |       |     |                                       |                                                  |           |

| Peptide                                            | Uniq | -10lgP | Mass      | Length | ppm  | m/z       | z | RT    | Fraction | Scan     | Source File        | Area Raw in gel | #Feature | #Feature Raw in gel | Start | End | PTM                                                                       | AScore                                                   | Found By  |
|----------------------------------------------------|------|--------|-----------|--------|------|-----------|---|-------|----------|----------|--------------------|-----------------|----------|---------------------|-------|-----|---------------------------------------------------------------------------|----------------------------------------------------------|-----------|
| K.KNPQLQDLDMM(+15.99)LTC(+57.02)VEIK.E             | N    | 95.01  | 2191.0686 | 18     | -3.4 | 1096.5378 | 2 | 32.73 | 14       | F14:1643 | OB5941 H1 raw.raw  | 1.9787E5        | 1        | 1                   | 414   | 431 | Carbamidomethylation                                                      | M11:Oxidation (M):9.34;C14:Carbamidomethylation:100.00   | PEAKS DB  |
| K.NPQLQDLDMM(-48.00)LTC(+57.02)VEIK.E              | N    | 93.52  | 1998.9755 | 17     | -2.5 | 1000.4926 | 2 | 32.55 | 14       | F14:1628 | OB5941 H1 raw.raw  | 1.3958E7        | 5        | 5                   | 415   | 431 | Carbamidomethylation                                                      | M10:Dethiomethyl:27.96;C13:Carbamidomethylation:100.00   | PEAKS PTM |
| K.NPQLQDLDM(+15.99)MLTC(+57.02)VEIKEGALMLPHFNSK.A  | N    | 92.22  | 3387.6335 | 29     | -1.5 | 1130.2168 | 3 | 36.17 | 14       | F14:1926 | OB5941 H1 raw.raw  | 2.8061E7        | 4        | 4                   | 415   | 443 | Carbamidomethylation                                                      | M9:Oxidation (M):10.11;C13:Carbamidomethylation:100.00   | PEAKS DB  |
| R.NNPFYFPSRR.F                                     | N    | 92.08  | 1296.6364 | 10     | -3.0 | 649.3235  | 2 | 28.67 | 14       | F14:1408 | OB5941 H1 raw.raw  | 1.2788E8        | 21       | 21                  | 166   | 175 |                                                                           |                                                          | PEAKS DB  |
| K.EGALM(+15.99)LPHFNSK.A                           | N    | 91.98  | 1358.6653 | 12     | 2.1  | 680.3414  | 2 | 29.74 | 14       | F14:1443 | OB5941 H1 raw.raw  | 1.9561E6        | 3        | 3                   | 432   | 443 | Oxidation (M)                                                             | M5:Oxidation (M):100.00                                  | PEAKS DB  |
| R.VLLEENAGGEQEERGQRR.R                             | N    | 91.09  | 2069.0249 | 18     | 2.1  | 690.6837  | 3 | 25.31 | 14       | F14:1186 | OB5941 H1 raw.raw  | 1.1888E6        | 3        | 3                   | 329   | 346 |                                                                           |                                                          | PEAKS DB  |
| R.SSDNEGVIVKVSKEHVQLTK.H                           | N    | 91.01  | 2325.2175 | 21     | 1.3  | 776.0808  | 3 | 28.31 | 14       | F14:1362 | OB5941 H1 raw.raw  | 1.0201E5        | 2        | 2                   | 351   | 371 |                                                                           |                                                          | PEAKS DB  |
| K.KNPQLQDLDMM(+15.99)LTC(+57.02)VEIKEGALMLPHFNSK.A | N    | 90.76  | 3515.7285 | 30     | -2.7 | 879.9370  | 4 | 34.52 | 13       | F13:1755 | OB5940 H1 raw.raw  | 2.6989E6        | 3        | 3                   | 414   | 443 | Carbamidomethylation                                                      | M11:Oxidation (M):30.46;C14:Carbamidomethylation:100.00  | PEAKS DB  |
| K.AM(-48.00)VIVVVNKG TGNLELVAVR.K                  | N    | 90.57  | 2033.1997 | 20     | -3.4 | 1017.6036 | 2 | 31.46 | 14       | F14:1539 | OB5941 H1 raw.raw  | 1.6588E7        | 6        | 6                   | 444   | 463 | Dethiomethyl                                                              | M2:Dethiomethyl:100.00                                   | PEAKS PTM |
| K.A(+57.02)MVIVVVNKG TGNLELVAVR.K                  | N    | 90.54  | 2138.2246 | 20     | -0.9 | 1070.1187 | 2 | 34.35 | 14       | F14:1737 | OB5941 H1 raw.raw  | 5.6414E6        | 3        | 3                   | 444   | 463 | Carbamidomethylation (DHKE, X@N-term)                                     | A1:Carbamidomethylation (DHKE, X@N-term):207.56          | PEAKS PTM |
| K.NPQLQDLDMMLTC(+57.02)VEIKEGALM(+15.99)LPHFNSK.A  | N    | 90.37  | 3387.6335 | 29     | -1.5 | 1130.2168 | 3 | 36.17 | 14       | F14:1895 | OB5941 H1 raw.raw  | 3.1109E7        | 7        | 7                   | 415   | 443 | Carbamidomethylation; Oxidation (M)                                       | C13:Carbamidomethylation:1000.00;M22:Oxidation (M):69.89 | PEAKS DB  |
| K.H(+57.02)ADADNILVIQGGQATVTVAN(+.98)GNNRK.S       | N    | 90.07  | 2804.4165 | 26     | -1.3 | 935.8115  | 3 | 30.08 | 14       | F14:1476 | OB5941 H1 raw.raw  | 6.8084E6        | 2        | 2                   | 223   | 248 | H1:Carbamidomethylation (DHKE, X@N-term):45.01;N21:Deamidation (NQ):14.04 |                                                          | PEAKS PTM |
| K.KGSEEDITNPINLRDGEPLDLSNNFGR.L                    | N    | 89.87  | 3015.4170 | 27     | -4.2 | 1006.1421 | 3 | 31.29 | 14       | F14:1549 | OB5941 H1 raw.raw  | 7.6E7           | 16       | 16                  | 379   | 405 |                                                                           |                                                          | PEAKS DB  |
| F.LAGDKDNVIDQIEK.Q                                 | N    | 89.22  | 1556.8046 | 14     | -3.2 | 779.4071  | 2 | 32.19 | 12       | F12:1557 | OB5939 H1 raw.raw  | 4.4864E6        | 2        | 2                   | 538   | 551 |                                                                           |                                                          | PEAKS DB  |
| K.I(+57.02)SMPVNTPGQFEDFFPASSR.D                   | N    | 88.49  | 2283.0630 | 20     | -0.1 | 1142.5387 | 2 | 35.84 | 12       | F12:1793 | OB5939 H1 raw.raw  | 6.4772E5        | 1        | 1                   | 282   | 301 | Carbamidomethylation (DHKE, X@N-term)                                     | I1:Carbamidomethylation (DHKE, X@N-term):156.03          | PEAKS PTM |
| K.DLAFIGSGEQVEKLIK.N                               | N    | 87.96  | 1729.9249 | 16     | 1.0  | 865.9706  | 2 | 33.30 | 7        | F7:1601  | OB5934 H3B raw.raw | 6.2551E5        | 3        | 3                   | 555   | 570 |                                                                           |                                                          | PEAKS DB  |
| total 219 peptides                                 |      |        |           |        |      |           |   |       |          |          |                    |                 |          |                     |       |     |                                                                           |                                                          |           |

| Peptide                                   | Uniq | -10lgP | Mass      | Length | ppm  | m/z       | z | RT    | Fraction | Scan     | Source File             | Area Raw in gel | #Feature | #Feature Raw in gel | Start | End | PTM                                   | AScore                                                   | Found By  |
|-------------------------------------------|------|--------|-----------|--------|------|-----------|---|-------|----------|----------|-------------------------|-----------------|----------|---------------------|-------|-----|---------------------------------------|----------------------------------------------------------|-----------|
| K.EGALMLPHFNSK.A                          | N    | 87.95  | 1342.6703 | 12     | 2.5  | 672.3441  | 2 | 29.83 | 13       | F13:1462 | OB5940<br>H1<br>raw.raw | 9.3502E6        | 3        | 3                   | 432   | 443 |                                       |                                                          | PEAKS DB  |
| K.HADADNILVIQQGQATVTVAN(+.98)GNNR.K       | N    | 87.06  | 2619.3000 | 25     | -1.2 | 1310.6558 | 2 | 30.35 | 13       | F13:1535 | OB5940<br>H1<br>raw.raw | 4.8683E6        | 1        | 1                   | 223   | 247 |                                       | N21:Deamidation (N Q):7.32                               | PEAKS DB  |
| K.AMVIVVVK.G                              | N    | 86.97  | 971.5837  | 9      | 0.9  | 486.7996  | 2 | 29.88 | 12       | F12:1441 | OB5939<br>H1<br>raw.raw | 9.5124E6        | 3        | 3                   | 444   | 452 |                                       |                                                          | PEAKS DB  |
| K.GTGNLELVAVR.K                           | N    | 86.65  | 1127.6299 | 11     | -0.8 | 564.8218  | 2 | 29.74 | 14       | F14:1450 | OB5941<br>H1<br>raw.raw | 1.0907E7        | 6        | 6                   | 453   | 463 |                                       |                                                          | PEAKS DB  |
| R.NNPFYFPSR.R                             | N    | 86.37  | 1140.5352 | 9      | -3.8 | 571.2727  | 2 | 31.46 | 14       | F14:1552 | OB5941<br>H1<br>raw.raw | 1.201E7         | 5        | 5                   | 166   | 174 |                                       |                                                          | PEAKS DB  |
| K.HADADNILVIQQGQATVTVAN(-17.03)GNNRK.S    | N    | 86.12  | 2729.3845 | 26     | -1.1 | 910.8011  | 3 | 29.38 | 14       | F14:1429 | OB5941<br>H1<br>raw.raw | 8.2265E6        | 4        | 4                   | 223   | 248 |                                       | N21:Ammonia-loss (N):18.53                               | PEAKS PTM |
| R.NTLEAAFAEFNEIRR.V                       | N    | 86.03  | 1893.9332 | 16     | -3.6 | 947.9705  | 2 | 35.28 | 12       | F12:1741 | OB5939<br>H1<br>raw.raw | 3.4229E8        | 38       | 38                  | 313   | 328 |                                       |                                                          | PEAKS DB  |
| R.I(+27.99)FLAGDKDNVIDQIEK.Q              | N    | 85.41  | 1844.9519 | 16     | 5.2  | 923.4880  | 2 | 36.16 | 14       | F14:1844 | OB5941<br>H1<br>raw.raw | 0               | 0        | 0                   | 536   | 551 | Formylation                           | I1:Formylation:77.93                                     | PEAKS PTM |
| K.SFNLDEGH(+57.02)ALR.I                   | N    | 84.87  | 1314.6316 | 11     | -1.2 | 658.3223  | 2 | 28.05 | 12       | F12:1298 | OB5939<br>H1<br>raw.raw | 5.1176E6        | 5        | 5                   | 249   | 259 |                                       | H8:Carbamidomethylation (DHKE, X@N-term):30.36           | PEAKS PTM |
| R.K(+57.02)SFNLDEGHALR.I                  | N    | 83.09  | 1442.7266 | 12     | -0.4 | 481.9159  | 3 | 25.70 | 14       | F14:1209 | OB5941<br>H1<br>raw.raw | 2.2174E5        | 3        | 3                   | 248   | 259 | Carbamidomethylation (DHKE, X@N-term) | K1:Carbamidomethylation (DHKE, X@N-term):51.63           | PEAKS PTM |
| K.KNPQLQLDM(+15.99)MLTC(+57.02)VEIK.E     | N    | 81.54  | 2191.0686 | 18     | 0.7  | 1096.5424 | 2 | 33.03 | 12       | F12:1615 | OB5939<br>H1<br>raw.raw | 0               | 0        | 0                   | 414   | 431 | Carbamidomethylation                  | M10:Oxidation (M):14.02;C14:Carbamidomethylation:1000.00 | PEAKS DB  |
| K.KNPQLQLDMLMTC(+57.02)VEIKEGALMLPHFNSK.A | N    | 81.26  | 3499.7336 | 30     | -0.1 | 875.9406  | 4 | 36.52 | 14       | F14:1868 | OB5941<br>H1<br>raw.raw | 1.091E7         | 3        | 3                   | 414   | 443 | Carbamidomethylation                  | C14:Carbamidomethylation:1000.00                         | PEAKS DB  |
| K.GTGNLELVAVRK.E                          | N    | 79.30  | 1255.7249 | 12     | 0.9  | 628.8702  | 2 | 26.85 | 14       | F14:1263 | OB5941<br>H1<br>raw.raw | 1.0437E7        | 9        | 9                   | 453   | 464 |                                       |                                                          | PEAKS DB  |
| R.GRREQEWEEEEEEEEGSNR.E                   | N    | 79.15  | 2650.0649 | 21     | 0.3  | 884.3625  | 3 | 25.64 | 13       | F13:1205 | OB5940<br>H1<br>raw.raw | 2.2346E6        | 7        | 7                   | 470   | 490 |                                       |                                                          | PEAKS DB  |
| E.PDLSNNFGR.L                             | N    | 78.38  | 1018.4832 | 9      | -0.1 | 510.2488  | 2 | 31.24 | 14       | F14:1545 | OB5941<br>H1<br>raw.raw | 3.5959E6        | 3        | 3                   | 397   | 405 |                                       |                                                          | PEAKS DB  |
| R.EETSRNNPFYFPSRR.F                       | N    | 78.31  | 1898.9023 | 15     | 1.2  | 633.9755  | 3 | 27.17 | 13       | F13:1289 | OB5940<br>H1<br>raw.raw | 6.7264E6        | 6        | 6                   | 161   | 175 |                                       |                                                          | PEAKS DB  |
| R.IFLAGDKDNVIDQIE(+57.02)K.Q              | N    | 78.23  | 1873.9785 | 16     | -5.0 | 937.9919  | 2 | 32.19 | 14       | F14:1583 | OB5941<br>H1<br>raw.raw | 3.036E7         | 3        | 3                   | 536   | 551 |                                       | E15:Carbamidomethylation (DHKE, X@N-term):0.00           | PEAKS PTM |
| I.PSGFISYILNR.H                           | N    | 77.77  | 1265.6768 | 11     | 2.4  | 633.8472  | 2 | 36.17 | 13       | F13:1844 | OB5940<br>H1<br>raw.raw | 2.5204E5        | 2        | 2                   | 261   | 271 |                                       |                                                          | PEAKS DB  |
| I.FLAGDKDNVIDQIEK.Q                       | N    | 77.74  | 1703.8729 | 15     | -9.3 | 852.9358  | 2 | 32.01 | 14       | F14:1599 | OB5941<br>H1<br>raw.raw | 1.3574E6        | 3        | 3                   | 537   | 551 |                                       |                                                          | PEAKS DB  |
| K.D(+57.02)LAFPGSGEQVEK.L                 | N    | 77.21  | 1432.6833 | 13     | 3.8  | 717.3517  | 2 | 30.92 | 12       | F12:1485 | OB5939<br>H1<br>raw.raw | 2.816E5         | 1        | 1                   | 555   | 567 | Carbamidomethylation (DHKE, X@N-term) | D1:Carbamidomethylation (DHKE, X@N-term)                 | PEAKS PTM |
| total 219 peptides                        |      |        |           |        |      |           |   |       |          |          |                         |                 |          |                     |       |     |                                       |                                                          |           |

| Peptide                                           | Uniq | -10lgP | Mass      | Length | ppm  | m/z       | z | RT    | Fraction | Scan     | Source File              | Area Raw in gel | #Feature | #Feature Raw in gel | Start | End | PTM                                   | AScore                                                                   | Found By  |
|---------------------------------------------------|------|--------|-----------|--------|------|-----------|---|-------|----------|----------|--------------------------|-----------------|----------|---------------------|-------|-----|---------------------------------------|--------------------------------------------------------------------------|-----------|
|                                                   |      |        |           |        |      |           |   |       |          |          |                          |                 |          |                     |       |     |                                       | X@N-term):93.18                                                          |           |
| R.SSDNEGVIVK.V                                    | N    | 76.72  | 1046.5244 | 10     | 0.3  | 524.2697  | 2 | 22.95 | 13       | F13:1057 | OB5940<br>H1<br>raw.raw  | 2.6758E5        | 6        | 6                   | 351   | 360 |                                       |                                                                          | PEAKS DB  |
| K.Q(-17.03)FQNLQNHRI                              | N    | 76.65  | 1166.5581 | 9      | -1.5 | 584.2855  | 2 | 27.77 | 14       | F14:1319 | OB5941<br>H1<br>raw.raw  | 3.3996E6        | 3        | 3                   | 199   | 207 | Pyro-glu from Q                       | Q1:Pyro-glu from Q:1000.00                                               | PEAKS PTM |
| K.HAD(+57.02)ADNILVIQGGQATVTVAN(+.98)GNNRK.S      | N    | 74.85  | 2804.4165 | 26     | -5.0 | 935.8081  | 3 | 28.96 | 13       | F13:1511 | OB5940<br>H1<br>raw.raw  | 3.7976E6        | 1        | 1                   | 223   | 248 |                                       | D3:Carbamidomethylation (DHKE, X@N-term):6.59;N21:Deamidation (NQ):14.04 | PEAKS PTM |
| K.HADADNILVIQGGQATVTVANGN(-17.03)NRK.S            | N    | 74.65  | 2729.3845 | 26     | -3.3 | 1365.6951 | 2 | 29.38 | 14       | F14:1432 | OB5941<br>H1<br>raw.raw  | 5.4978E5        | 1        | 1                   | 223   | 248 |                                       | N23:Ammonia-loss (N):0.00                                                | PEAKS PTM |
| K.ISMPVNTPGQFEDFFPASSRDQSSYLQGFSR.N               | N    | 74.49  | 3494.6201 | 31     | 2.7  | 1165.8838 | 3 | 36.29 | 2        | F2:1620  | OB5925<br>H3B<br>raw.raw | 9.3886E7        | 15       | 15                  | 282   | 312 |                                       |                                                                          | PEAKS DB  |
| R.NTLEAAFNAEFN(+.98)EIRR.V                        | N    | 74.39  | 1894.9172 | 16     | -3.7 | 948.4624  | 2 | 32.73 | 14       | F14:1640 | OB5941<br>H1<br>raw.raw  | 4.113E6         | 3        | 3                   | 313   | 328 | Deamidation (NQ)                      | N12:Deamidation (NQ):55.21                                               | PEAKS DB  |
| R.LFEVKPKKKNPQLQDLDMMLTC(+57.02)VEIK.E            | N    | 73.38  | 3131.6069 | 26     | 3.7  | 1044.8801 | 3 | 33.97 | 13       | F13:1716 | OB5940<br>H1<br>raw.raw  | 3.7487E6        | 3        | 3                   | 406   | 431 | Carbamidomethylation                  | C22:Carbamidomethylation:1000.00                                         | PEAKS DB  |
| K.NPQLQDLDMM(+15.99)LTC(+57.02)VEIKEGALMLPHFNSK.A | N    | 73.21  | 3387.6335 | 29     | 5.6  | 847.9204  | 4 | 35.82 | 13       | F13:1825 | OB5940<br>H1<br>raw.raw  | 9.6415E6        | 3        | 3                   | 415   | 443 | Carbamidomethylation                  | M10:Oxidation (M):16.90;C13:Carbamidomethylation:1000.00                 | PEAKS DB  |
| A.GDKDNVIDQIEK.Q                                  | N    | 73.04  | 1372.6833 | 12     | -2.8 | 687.3470  | 2 | 32.19 | 12       | F12:1561 | OB5939<br>H1<br>raw.raw  | 1.4449E6        | 3        | 3                   | 540   | 551 |                                       |                                                                          | PEAKS DB  |
| R.V(+57.02)LLEENAGGEQEER.G                        | N    | 73.00  | 1628.7642 | 14     | 1.1  | 815.3903  | 2 | 27.03 | 14       | F14:1288 | OB5941<br>H1<br>raw.raw  | 2.7852E5        | 3        | 3                   | 329   | 342 |                                       | V1:Carbamidomethylation (DHKE, X@N-term):44.44                           | PEAKS PTM |
| R.EETSRNNPFYFPSR.R                                | N    | 72.75  | 1742.8011 | 14     | -0.9 | 581.9405  | 3 | 29.89 | 12       | F12:1419 | OB5939<br>H1<br>raw.raw  | 4.0306E4        | 1        | 1                   | 161   | 174 |                                       |                                                                          | PEAKS DB  |
| R.IPSGFISYLN(-17.03)R.H                           | N    | 72.57  | 1361.7343 | 12     | 1.4  | 681.8754  | 2 | 37.47 | 13       | F13:1926 | OB5940<br>H1<br>raw.raw  | 5.3561E5        | 2        | 2                   | 260   | 271 | Ammonia-loss (N)                      | N11:Ammonia-loss (N):1000.00                                             | PEAKS PTM |
| R.IPSGFISY(+125.90)ILNR.H                         | N    | 72.49  | 1504.6575 | 12     | 1.5  | 753.3372  | 2 | 37.84 | 13       | F13:1946 | OB5940<br>H1<br>raw.raw  | 9.8379E5        | 2        | 2                   | 260   | 271 | Iodination                            | Y8:Iodination:1000.00                                                    | PEAKS PTM |
| R.IPSGFISYILNRH(+57.02)DNQNL.R.V                  | N    | 72.20  | 2313.1978 | 19     | 2.0  | 579.3079  | 4 | 33.29 | 12       | F12:1633 | OB5939<br>H1<br>raw.raw  | 3.81E7          | 4        | 4                   | 260   | 278 |                                       | H13:Carbamidomethylation (DHKE, X@N-term):9.34                           | PEAKS PTM |
| R.VLLEEN(+.98)AGGEQEER.G                          | N    | 71.59  | 1572.7267 | 14     | -3.7 | 787.3677  | 2 | 26.82 | 13       | F13:1276 | OB5940<br>H1<br>raw.raw  | 0               | 0        | 0                   | 329   | 342 | Deamidation (NQ)                      | N6:Deamidation (NQ):71.64                                                | PEAKS DB  |
| A.FPGSGEQVEK.L                                    | N    | 71.45  | 1076.5138 | 10     | 5.5  | 539.2672  | 2 | 30.23 | 12       | F12:1449 | OB5939<br>H1<br>raw.raw  | 6.1112E4        | 1        | 1                   | 558   | 567 |                                       |                                                                          | PEAKS DB  |
| K.A(+57.02)MVIVVVKGTGNLELVAVRK.E                  | N    | 70.77  | 2266.3196 | 21     | -1.6 | 1134.1653 | 2 | 32.33 | 13       | F13:1602 | OB5940<br>H1<br>raw.raw  | 4.861E7         | 6        | 6                   | 444   | 464 | Carbamidomethylation (DHKE, X@N-term) | A1:Carbamidomethylation (DHKE, X@N-term):161.20                          | PEAKS PTM |
| total 219 peptides                                |      |        |           |        |      |           |   |       |          |          |                          |                 |          |                     |       |     |                                       |                                                                          |           |



| Peptide                                               | Uniq | -10lgP | Mass      | Length | ppm  | m/z       | z | RT    | Fraction | Scan     | Source File        | Area Raw in gel | #Feature | #Feature Raw in gel | Start | End | PTM                                   | AScore                                                                                 | Found By  |
|-------------------------------------------------------|------|--------|-----------|--------|------|-----------|---|-------|----------|----------|--------------------|-----------------|----------|---------------------|-------|-----|---------------------------------------|----------------------------------------------------------------------------------------|-----------|
| K.AM(+15.99)VIVVVNK.G                                 | N    | 70.64  | 987.5787  | 9      | 0.7  | 494.7969  | 2 | 26.66 | 14       | F14:1257 | OB5941 H1 raw.raw  | 8.6431E5        | 3        | 3                   | 444   | 452 | Oxidation (M)                         | M2:Oxidation (M):100.0.00                                                              | PEAKS DB  |
| K.KNPQLQDLMLTLC(+57.02)VEIKEGALM(+15.99)LPHFNSK.A     | N    | 70.55  | 3515.7285 | 30     | -0.8 | 879.9387  | 4 | 35.84 | 12       | F12:1790 | OB5939 H1 raw.raw  | 4.7958E6        | 2        | 2                   | 414   | 443 | Carbamidomethylation; Oxidation (M)   | C14:Carbamidomethylation:1000.00;M23:Oxidation (M):69.38                               | PEAKS DB  |
| K.SVSKKGSEEDITNPINLR.D                                | N    | 69.76  | 2115.0808 | 19     | 2.6  | 706.0361  | 3 | 27.22 | 14       | F14:1299 | OB5941 H1 raw.raw  | 5.5052E4        | 1        | 1                   | 375   | 393 |                                       |                                                                                        | PEAKS DB  |
| Q.GQATVTVAN(+.98)GNNRK.S                              | N    | 69.60  | 1429.7273 | 14     | -4.1 | 715.8680  | 2 | 29.38 | 14       | F14:1424 | OB5941 H1 raw.raw  | 5.134E5         | 2        | 2                   | 235   | 248 |                                       | N9:Deamidation (NQ):41.83                                                              | PEAKS DB  |
| R.NT(-18.01)LEAAFAEFNEIRR.V                           | N    | 68.32  | 1875.9227 | 16     | -3.2 | 626.3129  | 3 | 33.81 | 14       | F14:1704 | OB5941 H1 raw.raw  | 1.3248E7        | 3        | 3                   | 313   | 328 | Dehydration                           | T2:Dehydration:1000.00                                                                 | PEAKS PTM |
| G.SEEEDITNPINLRDGEPLDLSNNFGR.L                        | N    | 67.86  | 2830.3005 | 25     | 1.2  | 944.4419  | 3 | 32.96 | 8        | F8:1576  | OB5935 H3B raw.raw | 5.6172E5        | 3        | 3                   | 381   | 405 |                                       |                                                                                        | PEAKS DB  |
| R.IVQIEARPNTLVLPK.H                                   | Y    | 67.84  | 1690.0140 | 15     | 2.2  | 846.0161  | 2 | 30.65 | 7        | F7:1446  | OB5934 H3B raw.raw | 2.806E8         | 26       | 26                  | 208   | 222 |                                       |                                                                                        | PEAKS DB  |
| R.LFEVKPKKNPQLQDLDM(+15.99)M(+15.99)LTC(+57.02)VEIK.E | N    | 67.75  | 3163.5967 | 26     | 2.1  | 791.9081  | 4 | 32.37 | 12       | F12:1585 | OB5939 H1 raw.raw  | 6.2675E5        | 1        | 1                   | 406   | 431 | Oxidation (M); Carbamidomethylation   | M18:Oxidation (M):100.0.00;M19:Oxidation (M):1000.00;C22:Carbamidomethylation:100.0.00 | PEAKS DB  |
| L.AGDKDNVIDQIEK.Q                                     | N    | 66.85  | 1443.7205 | 13     | -3.1 | 722.8653  | 2 | 32.19 | 12       | F12:1560 | OB5939 H1 raw.raw  | 7.0907E5        | 2        | 2                   | 539   | 551 |                                       |                                                                                        | PEAKS DB  |
| K.G(+57.02)TGNLELVAVRK.E                              | N    | 66.68  | 1312.7462 | 12     | -0.7 | 657.3799  | 2 | 26.85 | 14       | F14:1280 | OB5941 H1 raw.raw  | 3.417E5         | 3        | 3                   | 453   | 464 | Carbamidomethylation (DHKE, X@N-term) | G1:Carbamidomethylation (DHKE, X@N-term):56.51                                         | PEAKS PTM |
| R.EGEQEWGTP(+15.99)GSEVREETSR.N                       | Y    | 66.56  | 2177.9460 | 19     | 1.3  | 726.9902  | 3 | 26.28 | 14       | F14:1241 | OB5941 H1 raw.raw  | 4.0056E6        | 2        | 2                   | 147   | 165 |                                       | P9:Oxidation or Hydroxylation:36.47                                                    | PEAKS PTM |
| K.SFNLDEGHALRIPSGFISYILNRHDNQNL.R.V                   | N    | 66.45  | 3495.7759 | 30     | -1.2 | 700.1616  | 5 | 36.31 | 13       | F13:1855 | OB5940 H1 raw.raw  | 1.2605E8        | 16       | 16                  | 249   | 278 |                                       |                                                                                        | PEAKS DB  |
| K.QFQNLQNHR.I                                         | N    | 66.40  | 1183.5846 | 9      | 0.2  | 592.7997  | 2 | 24.53 | 14       | F14:1134 | OB5941 H1 raw.raw  | 7.3427E4        | 5        | 5                   | 199   | 207 |                                       |                                                                                        | PEAKS DB  |
| D.KDNVIDQIEK.Q                                        | N    | 66.36  | 1200.6350 | 10     | -0.8 | 601.3243  | 2 | 25.89 | 14       | F14:1225 | OB5941 H1 raw.raw  | 5.8609E4        | 3        | 3                   | 542   | 551 |                                       |                                                                                        | PEAKS DB  |
| K.NPQLQ(+.98)DLMLTLC(+57.02)VEIKEGALMLPHFNSK.A        | N    | 66.16  | 3372.6226 | 29     | 5.7  | 1125.2212 | 3 | 37.84 | 13       | F13:1936 | OB5940 H1 raw.raw  | 5.3127E7        | 3        | 3                   | 415   | 443 | Carbamidomethylation                  | Q5:Deamidation (NQ):32.28;C13:Carbamidomethylation:1000.00                             | PEAKS DB  |
| K.HADADNILVIQGGQATVTVANGNN(+.98)RK.S                  | N    | 65.93  | 2747.3950 | 26     | 4.5  | 1374.7109 | 2 | 29.70 | 10       | F10:1444 | OB5937 H3A raw.raw | 5.6818E5        | 3        | 3                   | 223   | 248 |                                       | N24:Deamidation (NQ):14.02                                                             | PEAKS DB  |
| K.ISMPVNTPGQ(+.98)FEDFFPASSR.D                        | N    | 65.70  | 2227.0254 | 20     | 6.4  | 1114.5271 | 2 | 63.55 | 14       | F14:3427 | OB5941 H1 raw.raw  | 1.0155E4        | 2        | 2                   | 282   | 301 |                                       | Q10:Deamidation (NQ):33.26                                                             | PEAKS DB  |
| R.N(+.98)TLEAAFAEFNEIRR.V                             | N    | 65.61  | 1894.9172 | 16     | 2.2  | 948.4680  | 2 | 35.88 | 12       | F12:1787 | OB5939 H1 raw.raw  | 7.0859E7        | 1        | 1                   | 313   | 328 | Deamidation (NQ)                      | N1:Deamidation (NQ):61.82                                                              | PEAKS DB  |
| total 219 peptides                                    |      |        |           |        |      |           |   |       |          |          |                    |                 |          |                     |       |     |                                       |                                                                                        |           |

| Peptide                                                   | Uniq | -10lgP | Mass      | Length | ppm  | m/z       | z | RT    | Fraction | Scan     | Source File        | Area Raw in gel | #Feature | #Feature Raw in gel | Start | End | PTM                                                  | AScore                                                                          | Found By  |
|-----------------------------------------------------------|------|--------|-----------|--------|------|-----------|---|-------|----------|----------|--------------------|-----------------|----------|---------------------|-------|-----|------------------------------------------------------|---------------------------------------------------------------------------------|-----------|
| K.KNPQLQLDLM(+15.99)MLTC(+57.02)VEIKEGALMLPHFNSK.A        | N    | 65.47  | 3515.7285 | 30     | -3.1 | 879.9366  | 4 | 35.44 | 13       | F13:1830 | OB5940 H1 raw.raw  | 7.2415E6        | 3        | 3                   | 414   | 443 | Carbamidomethylation                                 | M10:Oxidation (M):11.06;C14:Carbamidomethylation:1000.00                        | PEAKS DB  |
| K.ISM(+15.99)PVNTPGQG(+.98)FEDFFPASSRDQSSYLQGFSR.N        | N    | 65.25  | 3511.5989 | 31     | 4.3  | 1171.5453 | 3 | 34.92 | 12       | F12:1731 | OB5939 H1 raw.raw  | 1.4851E6        | 1        | 1                   | 282   | 312 | Oxidation (M)                                        | M3:Oxidation (M):100.00;Q10:Deamidation (NQ):27.62                              | PEAKS DB  |
| K.NPQLQLDLM(+15.99)MLTC(+57.02)VEIKEGALM(+15.99)LPHFNSK.A | N    | 64.53  | 3403.6284 | 29     | 4.5  | 1135.5552 | 3 | 36.52 | 14       | F14:1873 | OB5941 H1 raw.raw  | 4.3451E6        | 3        | 3                   | 415   | 443 | Carbamidomethylation; Oxidation (M)                  | M9:Oxidation (M):10.11;C13:Carbamidomethylation:1000.00;M22:Oxidation (M):53.09 | PEAKS DB  |
| R.LFEVKPKDK.K                                             | N    | 63.66  | 974.5436  | 8      | 0.9  | 488.2795  | 2 | 25.40 | 12       | F12:1153 | OB5939 H1 raw.raw  | 6.8606E5        | 7        | 7                   | 406   | 413 |                                                      |                                                                                 | PEAKS DB  |
| F.NLDEGHAI.R.I                                            | N    | 63.51  | 1023.5097 | 9      | 2.3  | 512.7633  | 2 | 27.35 | 13       | F13:1309 | OB5940 H1 raw.raw  | 1.5878E6        | 3        | 3                   | 251   | 259 |                                                      |                                                                                 | PEAKS DB  |
| R.WGPAEPR.E                                               | Y    | 63.43  | 811.3976  | 7      | 1.2  | 406.7066  | 2 | 25.31 | 14       | F14:1167 | OB5941 H1 raw.raw  | 1.2167E6        | 5        | 5                   | 109   | 115 |                                                      |                                                                                 | PEAKS DB  |
| R.EQEWEHEHEHEHEGNSREVR.R                                  | N    | 63.32  | 2665.0535 | 21     | 2.4  | 889.3606  | 3 | 27.87 | 12       | F12:1308 | OB5939 H1 raw.raw  | 4.1617E5        | 2        | 2                   | 473   | 493 |                                                      |                                                                                 | PEAKS DB  |
| R.REQEWEHEHEHEHEGNSR.E                                    | N    | 63.17  | 2436.9424 | 19     | 2.8  | 1219.4819 | 2 | 26.47 | 14       | F14:1258 | OB5941 H1 raw.raw  | 2.6135E4        | 2        | 2                   | 472   | 490 |                                                      |                                                                                 | PEAKS DB  |
| K.ISM(-48.00)PVNTPGQGFEDFFPASSR.D                         | N    | 62.93  | 2178.0381 | 20     | 0.2  | 727.0201  | 3 | 32.37 | 12       | F12:1577 | OB5939 H1 raw.raw  | 2.6788E7        | 5        | 5                   | 282   | 301 | Dethiomethyl                                         | M3:Dethiomethyl:100.00                                                          | PEAKS PTM |
| N.TPGQGFEDFFPASSR.D                                       | N    | 62.85  | 1584.7208 | 14     | -0.2 | 793.3676  | 2 | 35.63 | 14       | F14:1821 | OB5941 H1 raw.raw  | 2.1663E5        | 1        | 1                   | 288   | 301 |                                                      |                                                                                 | PEAKS DB  |
| K.A(+57.02)M(+15.99)VIVVVNKGTGNLELVAVR.K                  | N    | 62.49  | 2154.2195 | 20     | -0.1 | 1078.1169 | 2 | 32.92 | 12       | F12:1614 | OB5939 H1 raw.raw  | 4.5509E5        | 2        | 2                   | 444   | 463 | Carbamidomethylation (DHKE, X@N-term); Oxidation (M) | A1:Carbamidomethylation (DHKE, X@N-term):139.69; M2:Oxidation (M):100.00        | PEAKS PTM |
| L.EAAFNAEFNEIRR.V                                         | N    | 62.30  | 1565.7585 | 13     | -4.7 | 783.8829  | 2 | 34.06 | 12       | F12:1677 | OB5939 H1 raw.raw  | 6.1232E5        | 1        | 1                   | 316   | 328 |                                                      |                                                                                 | PEAKS DB  |
| K.N(+.98)PQLQLDLMMLTC(+57.02)VEIKEGALMLPHFNSK.A           | N    | 61.86  | 3372.6226 | 29     | 5.7  | 1125.2212 | 3 | 37.84 | 13       | F13:1983 | OB5940 H1 raw.raw  | 1.2903E7        | 1        | 1                   | 415   | 443 | Carbamidomethylation                                 | N1:Deamidation (NQ):14.04;C13:Carbamidomethylation:1000.00                      | PEAKS DB  |
| K.HADADNILVIQGGQ(+.98)ATVTVAN(+.98)GNNRK.S                | N    | 61.75  | 2748.3792 | 26     | 1.4  | 1375.1987 | 2 | 29.55 | 13       | F13:1443 | OB5940 H1 raw.raw  | 4.856E5         | 1        | 1                   | 223   | 248 |                                                      | Q14:Deamidation (NQ):32.28;N21:Deamidation (NQ):14.04                           | PEAKS DB  |
| N.LDEGHAI.R.I                                             | N    | 60.44  | 909.4668  | 8      | 0.6  | 455.7409  | 2 | 27.35 | 13       | F13:1312 | OB5940 H1 raw.raw  | 3.1152E4        | 1        | 1                   | 252   | 259 |                                                      |                                                                                 | PEAKS DB  |
| R.IFLAGDKDNVIDQ(+.98)IEKQAK.D                             | N    | 58.72  | 2145.1316 | 19     | 9.3  | 716.0578  | 3 | 32.93 | 2        | F2:1432  | OB5925 H3B raw.raw | 1.5596E6        | 1        | 1                   | 536   | 554 |                                                      | Q13:Deamidation (NQ):0.00                                                       | PEAKS DB  |
| K.HADADNILVIQ(+.98)Q(+.98)GQATVTVAN(+.98)GNNRK.S          | N    | 58.62  | 2749.3630 | 26     | 9.6  | 917.4705  | 3 | 30.18 | 13       | F13:1524 | OB5940 H1 raw.raw  | 4.3812E6        | 1        | 1                   | 223   | 248 |                                                      | Q11:Deamidation (NQ):26.52;Q                                                    | PEAKS DB  |
| total 219 peptides                                        |      |        |           |        |      |           |   |       |          |          |                    |                 |          |                     |       |     |                                                      |                                                                                 |           |

| Peptide                                          | Uniq | -10lgP | Mass      | Length | ppm  | m/z       | z | RT    | Fraction | Scan     | Source File       | Area Raw in gel | #Feature | #Feature Raw in gel | Start | End | PTM                                   | AScore                                                                           | Found By  |
|--------------------------------------------------|------|--------|-----------|--------|------|-----------|---|-------|----------|----------|-------------------|-----------------|----------|---------------------|-------|-----|---------------------------------------|----------------------------------------------------------------------------------|-----------|
|                                                  |      |        |           |        |      |           |   |       |          |          |                   |                 |          |                     |       |     |                                       | 12:Deamidation (NQ):18.53;N21:Deamidation (NQ):14.04                             |           |
| R.D(+57.02)QSSYLQGFSR.N                          | N    | 58.49  | 1343.6106 | 11     | -2.5 | 672.8109  | 2 | 31.19 | 12       | F12:1506 | OB5939 H1 raw.raw | 3.7713E4        | 1        | 1                   | 302   | 312 | Carbamidomethylation (DHKE, X@N-term) | D1:Carbamidomethylation (DHKE, X@N-term):1000.00                                 | PEAKS PTM |
| K.HADADNILVIQ(+.98)QGQATVTVAN(+.98)GNNRK.S       | N    | 58.29  | 2748.3792 | 26     | 4.6  | 1375.2031 | 2 | 31.28 | 12       | F12:1539 | OB5939 H1 raw.raw | 1.8636E5        | 1        | 1                   | 223   | 248 |                                       | Q11:Deamidation (NQ):15.10;N21:Deamidation (NQ):17.01                            | PEAKS DB  |
| K.HADADN(+.98)ILVIQ(+.98)QGQATVTVANGNNRK.S       | N    | 57.75  | 2748.3792 | 26     | 3.1  | 1375.2010 | 2 | 30.08 | 14       | F14:1495 | OB5941 H1 raw.raw | 1.5756E6        | 1        | 1                   | 223   | 248 |                                       | N6:Deamidation (NQ):0.00;Q11:Deamidation (NQ):0.00                               | PEAKS DB  |
| N.PFYFPSRR.F                                     | N    | 57.72  | 1068.5504 | 8      | 3.3  | 535.2842  | 2 | 28.95 | 12       | F12:1360 | OB5939 H1 raw.raw | 3.0845E6        | 3        | 3                   | 168   | 175 |                                       |                                                                                  | PEAKS DB  |
| R.LFEVKPKKPNQLQDLDMM(+15.99)LTC(+57.02)VEIK.E    | N    | 57.62  | 3147.6018 | 26     | -4.4 | 787.9042  | 4 | 32.55 | 14       | F14:1633 | OB5941 H1 raw.raw | 2.1102E6        | 3        | 3                   | 406   | 431 | Carbamidomethylation                  | M19:Oxidation (M):17.01;C22:Carbamidomethylation:1000.00                         | PEAKS DB  |
| K.SFN(+.98)LDEGHALRIPSGFISYILNR.H                | N    | 57.28  | 2619.3445 | 23     | 9.3  | 655.8495  | 4 | 38.22 | 12       | F12:1947 | OB5939 H1 raw.raw | 1.0265E6        | 2        | 2                   | 249   | 271 |                                       | N3:Deamidation (NQ):32.08                                                        | PEAKS DB  |
| K.AMVIVVN(+.98)KGTGNLELVAVRK.E                   | N    | 56.84  | 2210.2820 | 21     | 9.6  | 737.7750  | 3 | 33.10 | 14       | F14:1664 | OB5941 H1 raw.raw | 8.0625E6        | 2        | 2                   | 444   | 464 |                                       | N8:Deamidation (NQ):41.87                                                        | PEAKS DB  |
| K.KNPQLQDLDMM(-48.00)LTC(+57.02)VEIK.E           | N    | 56.43  | 2127.0703 | 18     | 0.8  | 710.0312  | 3 | 31.11 | 14       | F14:1538 | OB5941 H1 raw.raw | 3.3192E6        | 2        | 2                   | 414   | 431 | Carbamidomethylation                  | M11:Dethiomethyl:14.02;C14:Carbamidomethylation:1000.00                          | PEAKS PTM |
| K.ISM(+15.99)PVNTPGQFEDFFPASSRDQSSYLQGFSR.N      | N    | 56.19  | 3510.6150 | 31     | 2.9  | 1171.2157 | 3 | 34.90 | 14       | F14:1765 | OB5941 H1 raw.raw | 1.0055E7        | 8        | 8                   | 282   | 312 | Oxidation (M)                         | M3:Oxidation (M):1000.00                                                         | PEAKS DB  |
| V.QIEARPNTLVLPK.H                                | Y    | 55.52  | 1477.8616 | 13     | -3.7 | 739.9353  | 2 | 30.24 | 14       | F14:1485 | OB5941 H1 raw.raw | 9.708E5         | 3        | 3                   | 210   | 222 |                                       |                                                                                  | PEAKS DB  |
| R.N(+57.02)NPFYFPSRR.F                           | N    | 55.47  | 1353.6577 | 10     | -2.6 | 677.8344  | 2 | 29.38 | 14       | F14:1433 | OB5941 H1 raw.raw | 6.1234E5        | 2        | 2                   | 166   | 175 | Carbamidomethylation (DHKE, X@N-term) | N1:Carbamidomethylation (DHKE, X@N-term):1000.00                                 | PEAKS PTM |
| R.SKQFQNLQNHR.I                                  | Y    | 55.18  | 1398.7117 | 11     | 1.0  | 467.2450  | 3 | 24.31 | 13       | F13:1132 | OB5940 H1 raw.raw | 2.6796E4        | 3        | 3                   | 197   | 207 |                                       |                                                                                  | PEAKS DB  |
| K.HADADNILVIQQGQATVTVANGN(+.98)NRK.S             | N    | 55.13  | 2747.3950 | 26     | 4.2  | 687.8589  | 4 | 29.51 | 12       | F12:1401 | OB5939 H1 raw.raw | 2.4633E7        | 5        | 5                   | 223   | 248 |                                       | N23:Deamidation (NQ):17.01                                                       | PEAKS DB  |
| K.HADADNILVIQQ(+.98)GQ(+.98)ATVTVAN(+.98)GNNRK.S | N    | 55.12  | 2749.3630 | 26     | 9.6  | 917.4705  | 3 | 30.18 | 13       | F13:1487 | OB5940 H1 raw.raw | 4.3812E6        | 1        | 1                   | 223   | 248 |                                       | Q12:Deamidation (NQ):14.02;Q14:Deamidation (NQ):13.03;N21:Deamidation (NQ):11.10 | PEAKS DB  |
| K.AM(-48.00)VIVVVNKGKTGNLELVAVRK.E               | N    | 54.93  | 2161.2947 | 21     | 1.4  | 1081.6561 | 2 | 29.80 | 14       | F14:1453 | OB5941 H1 raw.raw | 1.7581E6        | 2        | 2                   | 444   | 464 | Dethiomethyl                          | M2:Dethiomethyl:1000.00                                                          | PEAKS PTM |
| total 219 peptides                               |      |        |           |        |      |           |   |       |          |          |                   |                 |          |                     |       |     |                                       |                                                                                  |           |

| Peptide                                                       | Uniq | -10lgP | Mass      | Length | ppm  | m/z       | z | RT    | Fraction | Scan     | Source File       | Area Raw in gel | #Feature | #Feature Raw in gel | Start | End | PTM                                    | AScore                                                                                                      | Found By  |
|---------------------------------------------------------------|------|--------|-----------|--------|------|-----------|---|-------|----------|----------|-------------------|-----------------|----------|---------------------|-------|-----|----------------------------------------|-------------------------------------------------------------------------------------------------------------|-----------|
| R.I(+57.02)VQIEARPNTLVLPK.H                                   | Y    | 54.55  | 1747.0355 | 15     | 3.8  | 874.5283  | 2 | 30.92 | 12       | F12:1489 | OB5939 H1 raw.raw | 3.7453E7        | 4        | 4                   | 208   | 222 | Carbamidomethylation (DHKE, X@N-term)  | I1:Carbamidomethylation (DHKE, X@N-term):97.69                                                              | PEAKS PTM |
| K.NPQLQDLDM(+15.99)MLTC(+57.02)VEIKEGALMLPHFN(+.98)SK.A       | N    | 54.06  | 3388.6174 | 29     | 5.0  | 848.1659  | 4 | 36.17 | 14       | F14:1849 | OB5941 H1 raw.raw | 6.0156E6        | 2        | 2                   | 415   | 443 | Carbamidomethylation; Deamidation (NQ) | M9:Oxidation (M):14.02;C13:Carbamidomethylation:1000.00;N27:Deamidation (NQ):58.23                          | PEAKS DB  |
| K.IRPEGREGGEQEWGTPGSEVREETSR.N                                | Y    | 53.77  | 2870.3542 | 25     | 1.1  | 718.5966  | 4 | 27.49 | 12       | F12:1279 | OB5939 H1 raw.raw | 3.216E6         | 3        | 3                   | 141   | 165 |                                        |                                                                                                             | PEAKS DB  |
| R.IFLAGDKDNVIDQIE(+57.02)KQAK.D                               | N    | 52.99  | 2201.1692 | 19     | -2.0 | 734.7289  | 3 | 31.83 | 13       | F13:1588 | OB5940 H1 raw.raw | 3.3379E6        | 2        | 2                   | 536   | 554 |                                        | E15:Carbamidomethylation (DHKE, X@N-term):12.28                                                             | PEAKS PTM |
| K.NPQLQDLDMMLTC(+57.02)VEIKEGALMLPHFN(+.98)SK.A               | N    | 52.89  | 3372.6226 | 29     | 7.4  | 844.1691  | 4 | 37.85 | 13       | F13:1914 | OB5940 H1 raw.raw | 5.2564E7        | 2        | 2                   | 415   | 443 | Carbamidomethylation; Deamidation (NQ) | C13:Carbamidomethylation:1000.00;N27:Deamidation (NQ):61.84                                                 | PEAKS DB  |
| K.HADADNILVIQQGQ(+.98)ATVTVANGNNRK.S                          | N    | 52.87  | 2747.3950 | 26     | 5.1  | 916.8103  | 3 | 44.47 | 12       | F12:2283 | OB5939 H1 raw.raw | 1.466E5         | 1        | 1                   | 223   | 248 |                                        | Q14:Deamidation (NQ):14.04                                                                                  | PEAKS DB  |
| K.NPQLQDLDM(+15.99)M(+15.99)LTC(+57.02)VEIKEGALMLPHFNSK.A     | N    | 52.70  | 3403.6284 | 29     | -4.3 | 1135.5452 | 3 | 35.63 | 14       | F14:1818 | OB5941 H1 raw.raw | 1.9434E6        | 2        | 2                   | 415   | 443 | Oxidation (M); Carbamidomethylation    | M9:Oxidation (M):49.75;M10:Oxidation (M):51.99;C13:Carbamidomethylation:1000.00                             | PEAKS DB  |
| L.DEGHALR.I                                                   | N    | 52.68  | 796.3828  | 7      | 2.3  | 399.1996  | 2 | 27.87 | 12       | F12:1309 | OB5939 H1 raw.raw | 2.418E4         | 1        | 1                   | 253   | 259 |                                        |                                                                                                             | PEAKS DB  |
| K.DLAFIGSGEQVEK(+57.02)LIK.N                                  | N    | 52.57  | 1786.9464 | 16     | -3.8 | 894.4771  | 2 | 32.91 | 14       | F14:1654 | OB5941 H1 raw.raw | 6.7177E5        | 1        | 1                   | 555   | 570 |                                        | K13:Carbamidomethylation (DHKE, X@N-term):27.96                                                             | PEAKS PTM |
| K.KN(+.98)PQLQDLDM(+15.99)LTC(+57.02)VEIK.E                   | N    | 52.31  | 2192.0527 | 18     | 9.2  | 1097.0437 | 2 | 32.33 | 13       | F13:1621 | OB5940 H1 raw.raw | 8.5775E4        | 1        | 1                   | 414   | 431 | Carbamidomethylation                   | N2:Deamidation (NQ):14.04;M11:Oxidation (M):0.00;C14:Carbamidomethylation:1000.00                           | PEAKS DB  |
| Q.GQATVTVANGNNRK.S                                            | N    | 51.97  | 1428.7433 | 14     | -0.2 | 715.3788  | 2 | 29.02 | 14       | F14:1412 | OB5941 H1 raw.raw | 1.2099E5        | 2        | 2                   | 235   | 248 |                                        |                                                                                                             | PEAKS DB  |
| K.EGALMLPH(+14.02)FNSK.A                                      | N    | 51.73  | 1356.6860 | 12     | 1.3  | 679.3512  | 2 | 30.49 | 14       | F14:1499 | OB5941 H1 raw.raw | 2.5741E4        | 1        | 1                   | 432   | 443 | Methylation(others)                    | H8:Methylation(others):53.53                                                                                | PEAKS PTM |
| K.N(+.98)PQLQ(+.98)DLDMMLTC(+57.02)VEIKEGALM(+15.99)LPHFNSK.A | N    | 51.60  | 3389.6016 | 29     | 9.0  | 848.4153  | 4 | 36.92 | 12       | F12:1868 | OB5939 H1 raw.raw | 2.6873E6        | 1        | 1                   | 415   | 443 | Carbamidomethylation                   | N1:Deamidation (NQ):0.00;Q5:Deamidation (NQ):14.04;C13:Carbamidomethylation:1000.00;M22:Oxidation (M):18.84 | PEAKS DB  |
| total 219 peptides                                            |      |        |           |        |      |           |   |       |          |          |                   |                 |          |                     |       |     |                                        |                                                                                                             |           |

| Peptide                                                       | Uniq | -10lgP | Mass      | Length | ppm  | m/z       | z | RT    | Fraction | Scan     | Source File       | Area Raw in gel | #Feature | #Feature Raw in gel | Start | End | PTM                                 | AScore                                                                                                        | Found By  |
|---------------------------------------------------------------|------|--------|-----------|--------|------|-----------|---|-------|----------|----------|-------------------|-----------------|----------|---------------------|-------|-----|-------------------------------------|---------------------------------------------------------------------------------------------------------------|-----------|
| R.LFEVKPKKK.N                                                 | N    | 50.85  | 1102.6385 | 9      | 1.1  | 552.3271  | 2 | 24.94 | 14       | F14:1179 | OB5941 H1 raw.raw | 2.3081E5        | 2        | 2                   | 406   | 414 |                                     |                                                                                                               | PEAKS DB  |
| R.RVLLEENAGGEQEERGQR.R                                        | N    | 50.67  | 2069.0249 | 18     | 2.1  | 690.6837  | 3 | 24.88 | 13       | F13:1165 | OB5940 H1 raw.raw | 2.7227E5        | 1        | 1                   | 328   | 345 |                                     |                                                                                                               | PEAKS DB  |
| K.N(+.98)PQLQDLDMMLTC(+57.02)VEIKEGALM(+15.99)LPHFNSK.A       | N    | 50.17  | 3388.6174 | 29     | -2.4 | 1130.5437 | 3 | 36.35 | 13       | F13:1874 | OB5940 H1 raw.raw | 8.9006E5        | 1        | 1                   | 415   | 443 | Carbamidomethylation; Oxidation (M) | N1:Deamidation (NQ): 0.00;C13:Carbamidomethylation: 1000.00;M22:Oxidation (M):54.40                           | PEAKS DB  |
| K.NPQLQDLDMM(+15.99)LTC(+57.02)VEIKEGALM(+15.99)LPHFNSK.A     | N    | 48.97  | 3403.6284 | 29     | 2.7  | 1135.5531 | 3 | 35.09 | 14       | F14:1786 | OB5941 H1 raw.raw | 3.2001E5        | 1        | 1                   | 415   | 443 | Carbamidomethylation                | M10:Oxidation (M):12.28;C13:Carbamidomethylation:1000.00;M22:Oxidation (M):28.29                              | PEAKS DB  |
| R.EQEWEEEEEEEEEGSNREVRR.Y                                     | N    | 48.85  | 2821.1545 | 22     | 1.8  | 941.3939  | 3 | 26.75 | 12       | F12:1227 | OB5939 H1 raw.raw | 3.3887E6        | 3        | 3                   | 473   | 494 |                                     |                                                                                                               | PEAKS DB  |
| K.KN(+.98)PQLQDLDMMLTC(+57.02)VEIKEGALMLPHFNSK.A              | N    | 48.84  | 3500.7175 | 30     | 7.1  | 876.1929  | 4 | 36.26 | 13       | F13:1847 | OB5940 H1 raw.raw | 2.2113E6        | 1        | 1                   | 414   | 443 | Carbamidomethylation                | N2:Deamidation (NQ): 0.00;C14:Carbamidomethylation: 1000.00                                                   | PEAKS DB  |
| R.IFLAGDKDNVIDQIEK(+57.02)QAK.D                               | N    | 48.82  | 2201.1692 | 19     | 2.7  | 734.7323  | 3 | 32.55 | 12       | F12:1581 | OB5939 H1 raw.raw | 3.2958E6        | 1        | 1                   | 536   | 554 |                                     | K16:Carbamidomethylation (DHKE, X@N-term):15.91                                                               | PEAKS PTM |
| R.EREEDWRQPR.E                                                | N    | 48.49  | 1399.6592 | 10     | 0.1  | 467.5604  | 3 | 24.77 | 14       | F14:1154 | OB5941 H1 raw.raw | 2.5247E4        | 1        | 1                   | 118   | 127 |                                     |                                                                                                               | PEAKS DB  |
| R.KSFN(+.98)LDEGHALRIPSGFISYILNR.H                            | N    | 47.51  | 2747.4395 | 24     | 4.5  | 687.8702  | 4 | 36.15 | 14       | F14:1837 | OB5941 H1 raw.raw | 1.0524E6        | 1        | 1                   | 248   | 271 |                                     | N4:Deamidation (NQ): 23.98                                                                                    | PEAKS DB  |
| R.LFEVKPKKKN(+.98)PQLQDLDMMLTC(+57.02)VEIK.E                  | N    | 47.32  | 3132.5908 | 26     | 9.3  | 1567.3173 | 2 | 34.35 | 14       | F14:1745 | OB5941 H1 raw.raw | 1.9315E5        | 1        | 1                   | 406   | 431 | Carbamidomethylation                | N10:Deamidation (NQ):14.04;C22:Carbamidomethylation:1000.00                                                   | PEAKS DB  |
| K.N(+.98)PQ(+.98)LQDLDMMLTC(+57.02)VEIKEGALM(+15.99)LPHFNSK.A | N    | 46.82  | 3389.6016 | 29     | 9.0  | 848.4153  | 4 | 36.92 | 12       | F12:1851 | OB5939 H1 raw.raw | 7.3613E6        | 2        | 2                   | 415   | 443 | Carbamidomethylation                | N1:Deamidation (NQ): 11.12;Q3:Deamidation (NQ):0.00;C13:Carbamidomethylation:1000.00;M22:Oxidation (M): 24.93 | PEAKS DB  |
| W.GTPGSEVREETSR.N                                             | Y    | 46.79  | 1403.6641 | 13     | 3.5  | 702.8417  | 2 | 27.60 | 14       | F14:1327 | OB5941 H1 raw.raw | 5.9917E4        | 1        | 1                   | 153   | 165 |                                     |                                                                                                               | PEAKS DB  |
| N.PQLQDLDMMLTC(+57.02)VEIKEGALMLPHFNSK.A                      | N    | 46.63  | 3257.5957 | 28     | 0.9  | 815.4069  | 4 | 37.83 | 14       | F14:1952 | OB5941 H1 raw.raw | 2.3692E5        | 1        | 1                   | 416   | 443 | Carbamidomethylation                | C12:Carbamidomethylation:1000.00                                                                              | PEAKS DB  |
| K.Q(-17.03)AKDLAFPGSGEQVEK.L                                  | N    | 46.49  | 1685.8260 | 16     | 0.9  | 843.9211  | 2 | 29.97 | 12       | F12:1427 | OB5939 H1 raw.raw | 0               | 0        | 0                   | 552   | 567 | Pyro-glu from Q                     | Q1:Pyro-glu from Q:1000.00                                                                                    | PEAKS PTM |
| K.SFN(+.98)LDEGHALRIPSGFISYILNRHDNQNLR.V                      | N    | 46.45  | 3496.7600 | 30     | -3.9 | 700.3566  | 5 | 36.38 | 12       | F12:1849 | OB5939 H1 raw.raw | 6.986E5         | 1        | 1                   | 249   | 278 |                                     | N3:Deamidation (NQ): 20.27                                                                                    | PEAKS DB  |
| total 219 peptides                                            |      |        |           |        |      |           |   |       |          |          |                   |                 |          |                     |       |     |                                     |                                                                                                               |           |

| Peptide                                          | Uniq | -10lgP | Mass      | Length | ppm  | m/z       | z | RT    | Fraction | Scan     | Source File        | Area Raw in gel | #Feature | #Feature Raw in gel | Start | End | PTM                                   | AScore                                                        | Found By  |
|--------------------------------------------------|------|--------|-----------|--------|------|-----------|---|-------|----------|----------|--------------------|-----------------|----------|---------------------|-------|-----|---------------------------------------|---------------------------------------------------------------|-----------|
| R.REQ(+.98)EWEEEEEEEEEESNR.E                     | N    | 45.55  | 2437.9265 | 19     | 7.6  | 813.6556  | 3 | 26.55 | 12       | F12:1226 | OB5939 H1 raw.raw  | 4.2319E4        | 1        | 1                   | 472   | 490 |                                       | Q3:Deamidation (NQ): 42.90                                    | PEAKS DB  |
| T.PQGFEFFPASSR.D                                 | N    | 45.25  | 1483.6731 | 13     | -1.3 | 742.8429  | 2 | 40.34 | 13       | F13:2103 | OB5940 H1 raw.raw  | 4.0298E3        | 1        | 1                   | 289   | 301 |                                       |                                                               | PEAKS DB  |
| R.IPSGFISYILN(+.98)RHDNQNL.R.V                   | N    | 45.21  | 2257.1604 | 19     | 9.9  | 753.4015  | 3 | 37.61 | 2        | F2:1698  | OB5925 H3B raw.raw | 2.0603E6        | 2        | 2                   | 260   | 278 |                                       | N11:Deamidation (NQ): 33.06                                   | PEAKS DB  |
| T.PGSEVREETSR.N                                  | Y    | 45.10  | 1245.5948 | 11     | 1.9  | 623.8059  | 2 | 27.69 | 12       | F12:1287 | OB5939 H1 raw.raw  | 4.1909E4        | 1        | 1                   | 155   | 165 |                                       |                                                               | PEAKS DB  |
| N.NPFYFPSRR.F                                    | N    | 45.02  | 1182.5934 | 9      | 1.6  | 395.2057  | 3 | 28.08 | 13       | F13:1358 | OB5940 H1 raw.raw  | 2.9991E4        | 1        | 1                   | 167   | 175 |                                       |                                                               | PEAKS DB  |
| R.DQS(-18.01)SYLQGF.SR.N                         | N    | 44.90  | 1268.5785 | 11     | 7.0  | 635.3010  | 2 | 30.87 | 12       | F12:1484 | OB5939 H1 raw.raw  | 0               | 0        | 0                   | 302   | 312 |                                       | S3:Dehydration: 33.98                                         | PEAKS PTM |
| K.GTGNLELVARKEQQR.G                              | N    | 44.58  | 1925.0442 | 17     | 0.6  | 642.6890  | 3 | 25.89 | 14       | F14:1220 | OB5941 H1 raw.raw  | 1.1112E5        | 2        | 2                   | 453   | 469 |                                       |                                                               | PEAKS DB  |
| R.EDWRRPSHQPR.K                                  | N    | 43.98  | 1590.7764 | 12     | -0.3 | 398.7012  | 4 | 24.94 | 14       | F14:1169 | OB5941 H1 raw.raw  | 1.0819E4        | 1        | 1                   | 128   | 139 |                                       |                                                               | PEAKS DB  |
| R.IVQIEARPNTLVLPK(+57.02).H                      | Y    | 43.35  | 1747.0355 | 15     | -2.4 | 874.5229  | 2 | 30.35 | 13       | F13:1460 | OB5940 H1 raw.raw  | 8.446E6         | 1        | 1                   | 208   | 222 | Carbamidomethylation (DHKE, X@N-term) | K15:Carbamidomethylation (DHKE, X@N-term): 110.46             | PEAKS PTM |
| R.VLLE(+21.98)ENAGGEQEER.G                       | N    | 42.61  | 1593.7246 | 14     | -0.7 | 797.8690  | 2 | 26.03 | 13       | F13:1239 | OB5940 H1 raw.raw  | 1.373E5         | 3        | 3                   | 329   | 342 |                                       | E4:Sodium adduct: 40.00                                       | PEAKS PTM |
| K.HADADN.LVIQ(+.98)QGQATVTVANGNNRK.S             | N    | 42.22  | 2747.3950 | 26     | 5.9  | 916.8110  | 3 | 45.04 | 14       | F14:2357 | OB5941 H1 raw.raw  | 0               | 0        | 0                   | 223   | 248 |                                       | Q11:Deamidation (NQ): 9.34                                    | PEAKS DB  |
| K.IRPEGREGQE.WGT.PGSEVR.E                        | Y    | 42.02  | 2268.0881 | 20     | 1.1  | 757.0375  | 3 | 26.28 | 14       | F14:1248 | OB5941 H1 raw.raw  | 5.4096E4        | 1        | 1                   | 141   | 160 |                                       |                                                               | PEAKS DB  |
| K.HADADN.LVIQ.QGQAT(-18.01)VTVAN(+.98)GNNRK.S    | N    | 41.92  | 2729.3845 | 26     | 0.3  | 683.3536  | 4 | 28.96 | 13       | F13:1411 | OB5940 H1 raw.raw  | 3.5545E5        | 1        | 1                   | 223   | 248 |                                       | T16:Dehydration: 8.22; N21:Deamidation (NQ): 6.08             | PEAKS PTM |
| K.HADADN(+.98)ILVIQ.QGQATVTVANGNNRK.S            | N    | 41.76  | 2747.3950 | 26     | 3.7  | 916.8090  | 3 | 50.62 | 12       | F12:2616 | OB5939 H1 raw.raw  | 1.1355E5        | 2        | 2                   | 223   | 248 |                                       | N6:Deamidation (NQ): 42.57                                    | PEAKS DB  |
| K.ISMPVN(+.98)TPGQFEFFPASSR.D                    | N    | 41.75  | 2227.0254 | 20     | 9.3  | 1114.5303 | 2 | 58.23 | 14       | F14:3138 | OB5941 H1 raw.raw  | 2.4983E4        | 1        | 1                   | 282   | 301 |                                       | N6:Deamidation (NQ): 42.89                                    | PEAKS DB  |
| M.LPHFNSK.A                                      | N    | 41.73  | 841.4446  | 7      | -3.4 | 421.7281  | 2 | 30.24 | 14       | F14:1484 | OB5941 H1 raw.raw  | 1.8069E6        | 2        | 2                   | 437   | 443 |                                       |                                                               | PEAKS DB  |
| R.PNTLVLPK.H                                     | N    | 41.66  | 880.5382  | 8      | 0.4  | 441.2766  | 2 | 27.53 | 13       | F13:1313 | OB5940 H1 raw.raw  | 8.5249E4        | 1        | 1                   | 215   | 222 |                                       |                                                               | PEAKS DB  |
| N.TLEAAFN.AEFNEIRR.V                             | N    | 41.51  | 1779.8904 | 15     | -3.0 | 890.9498  | 2 | 32.91 | 14       | F14:1655 | OB5941 H1 raw.raw  | 4.1608E5        | 1        | 1                   | 314   | 328 |                                       |                                                               | PEAKS DB  |
| K.KGSEEDITN(-17.03)PINLR.D                       | N    | 41.49  | 1696.8268 | 15     | 3.3  | 566.6180  | 3 | 28.85 | 14       | F14:1397 | OB5941 H1 raw.raw  | 2.3089E5        | 1        | 1                   | 379   | 393 |                                       | N10:Ammonia-loss (N): 40.63                                   | PEAKS PTM |
| K.KNPQLQ(+.98)DLDMMLTC(+57.02)VEIKEGALMLPHFNSK.A | N    | 40.89  | 3500.7175 | 30     | 0.4  | 1167.9136 | 3 | 36.34 | 13       | F13:1850 | OB5940 H1 raw.raw  | 4.7608E5        | 1        | 1                   | 414   | 443 | Carbamidomethylation                  | Q6:Deamidation (NQ): 14.04; C14:Carbamidomethylation: 1000.00 | PEAKS DB  |
| R.REQEWEEEEEEEEGSNREVR.R                         | N    | 40.76  | 2821.1545 | 22     | 3.9  | 941.3958  | 3 | 26.47 | 14       | F14:1247 | OB5941 H1 raw.raw  | 1.8468E6        | 1        | 1                   | 472   | 493 |                                       |                                                               | PEAKS DB  |
| total 219 peptides                               |      |        |           |        |      |           |   |       |          |          |                    |                 |          |                     |       |     |                                       |                                                               |           |

| Peptide                                        | Uniq | -10lgP | Mass      | Length | ppm  | m/z       | z | RT    | Fraction | Scan     | Source File       | Area Raw in gel | #Feature | #Feature Raw in gel | Start | End | PTM                                 | AScore                                                                                | Found By  |
|------------------------------------------------|------|--------|-----------|--------|------|-----------|---|-------|----------|----------|-------------------|-----------------|----------|---------------------|-------|-----|-------------------------------------|---------------------------------------------------------------------------------------|-----------|
| R.NTLEAAFN(+.98)AEFNEIRR.V                     | N    | 40.23  | 1894.9172 | 16     | -0.3 | 948.4656  | 2 | 32.92 | 12       | F12:1570 | OB5939 H1 raw.raw | 1.5322E6        | 1        | 1                   | 313   | 328 |                                     | N8:Deamidation (NQ): 8.26                                                             | PEAKS DB  |
| K.NPQLQLDLM(+15.99)M(+15.99)LTC(+57.02)VEIK.E  | N    | 39.57  | 2078.9688 | 17     | 1.1  | 1040.4928 | 2 | 33.80 | 14       | F14:1701 | OB5941 H1 raw.raw | 0               | 0        | 0                   | 415   | 431 | Oxidation (M); Carbamidomethylation | M9:Oxidation (M):100.0.00;M10:Oxidation (M):1000.00;C13:Carbamidomethylation:100.0.00 | PEAKS DB  |
| R.IPS(+59.02)GFISYILNR.H                       | N    | 39.40  | 1437.7802 | 12     | 1.5  | 719.8984  | 2 | 36.96 | 12       | F12:1870 | OB5939 H1 raw.raw | 4.3694E5        | 1        | 1                   | 260   | 271 |                                     | S3:Aminoethylcysteine:49.79                                                           | PEAKS PTM |
| K.HADADNILVIQQ(-18.01).G                       | N    | 38.68  | 1317.6677 | 12     | -4.9 | 659.8379  | 2 | 29.56 | 14       | F14:1421 | OB5941 H1 raw.raw | 1.6968E5        | 2        | 2                   | 223   | 234 | Dehydration                         | Q12:Dehydration:76.18                                                                 | PEAKS PTM |
| K.AMVIVVVK(-1.03)GTGNLELVAVR.K                 | N    | 37.92  | 2080.1714 | 20     | 4.3  | 1041.0974 | 2 | 33.79 | 13       | F13:1738 | OB5940 H1 raw.raw | 2.1453E7        | 1        | 1                   | 444   | 463 | Lysine oxidation to aminoaldehyde   | K9:Lysine oxidation to aminoaldehyde:1000.00                                          | PEAKS PTM |
| I.PSGFISYILNRHDNQNL.R                          | N    | 37.07  | 2143.0923 | 18     | 4.0  | 715.3742  | 3 | 33.53 | 12       | F12:1645 | OB5939 H1 raw.raw | 0               | 0        | 0                   | 261   | 278 |                                     |                                                                                       | PEAKS DB  |
| K.EGALM(-48.00)LPHFNSK.A                       | N    | 36.97  | 1294.6670 | 12     | 2.0  | 432.5638  | 3 | 28.31 | 14       | F14:1348 | OB5941 H1 raw.raw | 1.3683E6        | 1        | 1                   | 432   | 443 | Dethiomethyl                        | M5:Dethiomethyl:100.0.00                                                              | PEAKS PTM |
| R.IFLAGDKDNVIDQ(+.98)IEK.Q                     | N    | 36.27  | 1817.9410 | 16     | 7.9  | 606.9924  | 3 | 63.32 | 14       | F14:3434 | OB5941 H1 raw.raw | 1.3413E4        | 1        | 1                   | 536   | 551 |                                     | Q13:Deamidation (NQ):25.70                                                            | PEAKS DB  |
| K.HAD(+57.02)ADNILVIQQGQATVTVANGN(+.98)NRK.S   | N    | 35.92  | 2804.4165 | 26     | -3.8 | 702.1088  | 4 | 28.95 | 13       | F13:1413 | OB5940 H1 raw.raw | 2.7833E5        | 1        | 1                   | 223   | 248 |                                     | D3:Carbamidomethylation (DHKE, X@N-term):4.64;N23:Deamidation (NQ):0.00               | PEAKS PTM |
| K.NPQ(+.98)LQLDMLLTC(+57.02)VEIKEGALMLPHFNSK.A | N    | 35.84  | 3372.6226 | 29     | 9.4  | 1125.2253 | 3 | 40.73 | 12       | F12:2064 | OB5939 H1 raw.raw | 5.6313E5        | 1        | 1                   | 415   | 443 | Carbamidomethylation                | Q3:Deamidation (NQ): 0.00;C13:Carbamidomethylation: 1000.00                           | PEAKS DB  |
| K.ISM(+15.99)PVNTPGQ(+.98)FEDFFPASSR.D         | N    | 35.67  | 2243.0205 | 20     | 6.2  | 1122.5245 | 2 | 50.73 | 12       | F12:2643 | OB5939 H1 raw.raw | 0               | 0        | 0                   | 282   | 301 | Oxidation (M)                       | M3:Oxidation (M):100.0.00;Q10:Deamidation (NQ):22.37                                  | PEAKS DB  |
| K.GT(-18.01)GNLELVAVRK.E                       | N    | 35.64  | 1237.7142 | 12     | 0.9  | 413.5790  | 3 | 26.41 | 13       | F13:1259 | OB5940 H1 raw.raw | 7.4255E5        | 3        | 3                   | 453   | 464 | Dehydration                         | T2:Dehydration:1000.00                                                                | PEAKS PTM |
| K.SFNLDEGHALRIPS.G                             | N    | 35.38  | 1554.7791 | 14     | -4.8 | 778.3931  | 2 | 30.79 | 13       | F13:1515 | OB5940 H1 raw.raw | 5.2113E3        | 1        | 1                   | 249   | 262 |                                     |                                                                                       | PEAKS DB  |
| R.DQ(+.98)SSYLQGFSSR.N                         | N    | 34.61  | 1287.5731 | 11     | -3.2 | 644.7917  | 2 | 63.83 | 14       | F14:3449 | OB5941 H1 raw.raw | 0               | 0        | 0                   | 302   | 312 |                                     | Q2:Deamidation (NQ): 41.87                                                            | PEAKS DB  |
| R.S(+57.02)SDNEGVIVK.V                         | N    | 34.54  | 1103.5459 | 10     | 0.3  | 552.7804  | 2 | 23.19 | 13       | F13:1066 | OB5940 H1 raw.raw | 0               | 0        | 0                   | 351   | 360 |                                     | S1:Carbamidomethylation (DHKE, X@N-term):11.10                                        | PEAKS PTM |
| Q.IEARPNTLVLPK.H                               | Y    | 34.19  | 1349.8030 | 12     | 2.2  | 675.9103  | 2 | 30.40 | 12       | F12:1461 | OB5939 H1 raw.raw | 1.011E6         | 3        | 3                   | 211   | 222 |                                     |                                                                                       | PEAKS DB  |
| R.NN(-17.03)PFYFSSRR.F                         | N    | 34.10  | 1279.6097 | 10     | -0.4 | 427.5437  | 3 | 28.25 | 13       | F13:1369 | OB5940 H1 raw.raw | 1.47E5          | 1        | 1                   | 166   | 175 |                                     | N2:Ammonia-loss (N): 12.28                                                            | PEAKS PTM |
| total 219 peptides                             |      |        |           |        |      |           |   |       |          |          |                   |                 |          |                     |       |     |                                     |                                                                                       |           |

| Peptide                                                              | Uniq | -10lgP | Mass      | Length | ppm  | m/z       | z | RT    | Fraction | Scan     | Source File       | Area Raw in gel | #Feature | #Feature Raw in gel | Start | End | PTM                                    | AScore                                                                                                                                      | Found By  |
|----------------------------------------------------------------------|------|--------|-----------|--------|------|-----------|---|-------|----------|----------|-------------------|-----------------|----------|---------------------|-------|-----|----------------------------------------|---------------------------------------------------------------------------------------------------------------------------------------------|-----------|
| T.G(+214.97)NLELVAVRK.E                                              | N    | 33.47  | 1312.6267 | 10     | 2.3  | 657.3221  | 2 | 27.95 | 14       | F14:1280 | OB5941 H1 raw.raw | 2.4669E5        | 1        | 1                   | 455   | 464 | 4-sulfophenyl isothiocyanate           | G1:4-sulfophenyl isothiocyanate:144.45                                                                                                      | PEAKS PTM |
| K.HADADNILVIQQ(+.98)GQATVTVANGNN(+.98)RK.S                           | N    | 33.28  | 2748.3792 | 26     | 7.6  | 917.1406  | 3 | 48.20 | 12       | F12:2471 | OB5939 H1 raw.raw | 2.0672E4        | 1        | 1                   | 223   | 248 |                                        | Q12:Deamidation (N Q):23.10;N 24:Deamidation (NQ):0.00                                                                                      | PEAKS DB  |
| K.HADAD(-18.01)NILVIQQGQATVTVANGNNRK.S                               | N    | 33.25  | 2728.4004 | 26     | 3.5  | 910.4772  | 3 | 28.70 | 13       | F13:1390 | OB5940 H1 raw.raw | 0               | 0        | 0                   | 223   | 248 |                                        | D5:Dehydration:30.36                                                                                                                        | PEAKS PTM |
| K.ISM(+15.99)PVN(+.98)TPGQFEDFFPASSR.D                               | N    | 33.05  | 2243.0205 | 20     | 7.6  | 1122.5260 | 2 | 49.72 | 13       | F13:2625 | OB5940 H1 raw.raw | 0               | 0        | 0                   | 282   | 301 | Oxidation (M)                          | M3:Oxidation (M):100 0.00;N6:Deamidation (NQ):25.70                                                                                         | PEAKS DB  |
| R.IFLAGDK(+26.02)DNVIDQIEK.Q                                         | N    | 32.97  | 1842.9727 | 16     | -0.2 | 922.4934  | 2 | 35.63 | 14       | F14:1844 | OB5941 H1 raw.raw | 1.4466E5        | 1        | 1                   | 536   | 551 | Acetaldehyde +26                       | K7:Acetaldehyde +26:74.34                                                                                                                   | PEAKS PTM |
| K.NPQLQ(+.98)DLDMM(+15.99)LTC(+57.02)VEIK.E                          | N    | 32.85  | 2063.9578 | 17     | -3.4 | 1032.9827 | 2 | 37.19 | 12       | F12:1881 | OB5939 H1 raw.raw | 2.2954E4        | 1        | 1                   | 415   | 431 | Carbamidomethylation                   | Q5:Deamidation (NQ):26.31;M10:Oxidation (M):0.00;C 13:Carbamidomethylation:1000.00                                                          | PEAKS DB  |
| K.HADADNILVIQ(+.98)QGQ(+.98)ATVTVANGNNRK.S                           | N    | 32.62  | 2748.3792 | 26     | 3.1  | 917.1365  | 3 | 57.24 | 13       | F13:3064 | OB5940 H1 raw.raw | 0               | 0        | 0                   | 223   | 248 |                                        | Q11:Deamidation (N Q):0.00;Q1 4:Deamidation (NQ):0.00                                                                                       | PEAKS DB  |
| K.N(+.98)PQ(+.98)LQ(+.98)DLDMM(+15.99)LTC(+57.02)VEIKEGALMLPHFNSK.A  | N    | 32.23  | 3390.5854 | 29     | 3.7  | 848.6568  | 4 | 38.47 | 14       | F14:1982 | OB5941 H1 raw.raw | 0               | 0        | 0                   | 415   | 443 | Deamidation (NQ); Carbamidomethylation | N1:Deamidation (NQ):62.42;Q3:Deamidation (NQ):65.9 2;Q5:Deamidation (N Q):60.92;M 10:Oxidation (M):12.2 8;C13:Carbamidomethylation:100 0.00 | PEAKS DB  |
| R.EGEQEWGT(-18.01)PGSEVREETSR.N                                      | Y    | 32.15  | 2143.9407 | 19     | 2.2  | 1072.9800 | 2 | 27.69 | 12       | F12:1293 | OB5939 H1 raw.raw | 4.1679E4        | 1        | 1                   | 147   | 165 |                                        | T8:Dehydration:20.70                                                                                                                        | PEAKS PTM |
| K.KN(+.98)PQ(+.98)LQ(+.98)DLDM(+15.99)MLTC(+57.02)VEIKEGALMLPHFNSK.A | N    | 31.81  | 3518.6804 | 30     | -3.0 | 880.6747  | 4 | 37.45 | 12       | F12:1882 | OB5939 H1 raw.raw | 0               | 0        | 0                   | 414   | 443 | Deamidation (NQ); Carbamidomethylation | N2:Deamidation (NQ):58.75;Q4:Deamidation (NQ):61.6 5;Q6:Deamidation (N Q):53.75;M 10:Oxidation (M):0.00; C14:Carbamidomethylation:1000.00   | PEAKS DB  |
| total 219 peptides                                                   |      |        |           |        |      |           |   |       |          |          |                   |                 |          |                     |       |     |                                        |                                                                                                                                             |           |



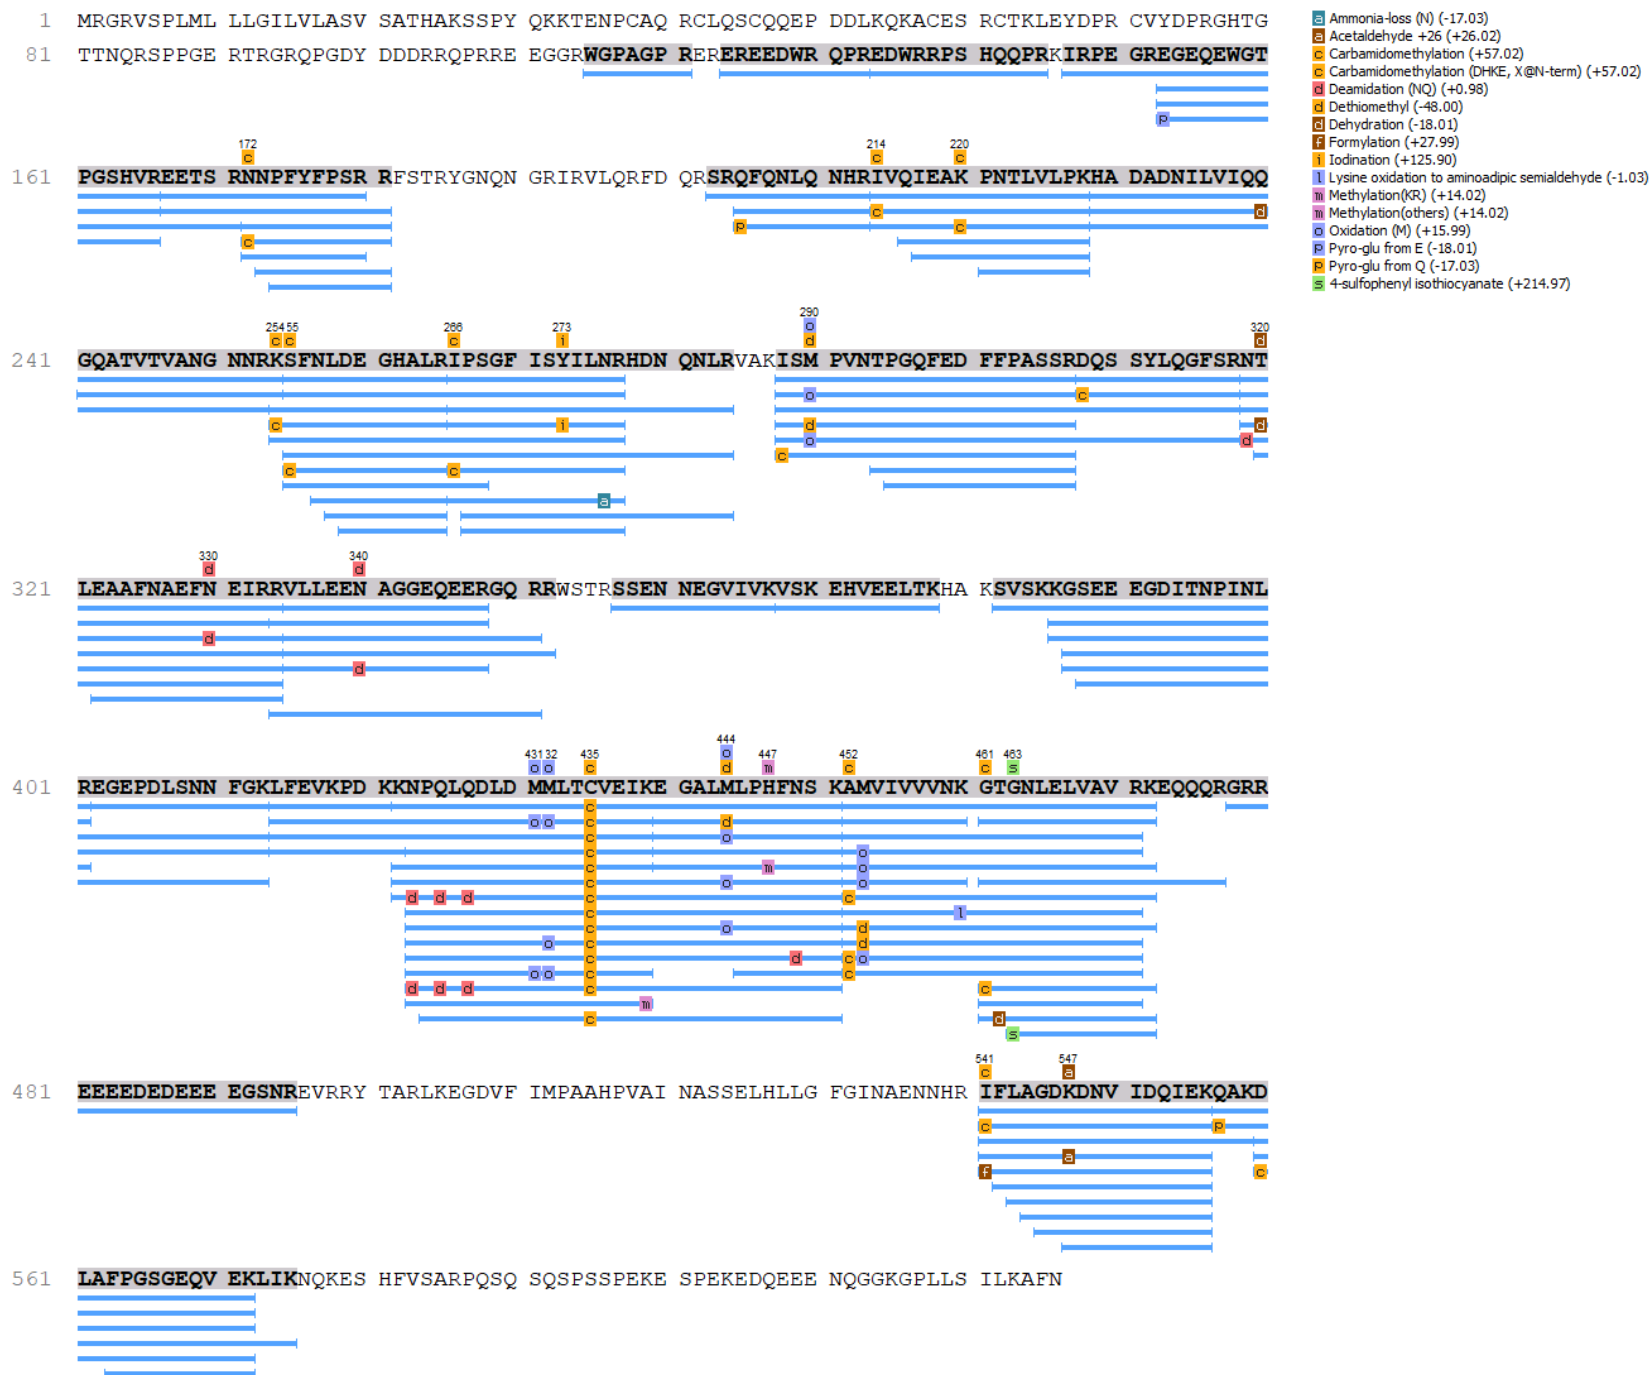

Supporting Peptides:

| Peptide                                   | Uniq | -10lgP | Mass      | Length | ppm  | m/z       | z | RT    | Fraction | Scan     | Source File        | Area Raw in gel | #Feature | #Feature Raw in gel | Start | End | PTM                  | AScore                                                  | Found By |
|-------------------------------------------|------|--------|-----------|--------|------|-----------|---|-------|----------|----------|--------------------|-----------------|----------|---------------------|-------|-----|----------------------|---------------------------------------------------------|----------|
| K.HADADNILVIQQGQATVTVAN(+.98)GNNRK.S      | N    | 140.09 | 2747.3950 | 26     | -1.1 | 916.8046  | 3 | 29.38 | 14       | F14:1509 | OB5941 H1 raw.raw  | 3.7837E8        | 20       | 20                  | 229   | 254 |                      | N21:Deamidation (NQ):26.31                              | PEAKS DB |
| K.KNPQLQDLMMMLTC(+57.02)VEIK.E            | N    | 137.14 | 2175.0737 | 18     | 2.4  | 1088.5468 | 2 | 34.90 | 14       | F14:1774 | OB5941 H1 raw.raw  | 4.1086E6        | 3        | 3                   | 422   | 439 | Carbamidomethylation | C14:Carbamidomethylation:1000.00                        | PEAKS DB |
| K.HADADNILVIQQGQATVTVANGNNR.K             | N    | 135.84 | 2618.3162 | 25     | 2.9  | 1310.1692 | 2 | 30.42 | 14       | F14:1494 | OB5941 H1 raw.raw  | 5.8142E6        | 3        | 3                   | 229   | 253 |                      |                                                         | PEAKS DB |
| K.ISMPVNTPGQFEDFFPASSR.D                  | N    | 135.58 | 2226.0415 | 20     | 1.9  | 1114.0302 | 2 | 35.63 | 14       | F14:1807 | OB5941 H1 raw.raw  | 2.1661E8        | 32       | 26                  | 288   | 307 |                      |                                                         | PEAKS DB |
| K.ISM(+15.99)PVNTPGQFEDFFPASSR.D          | N    | 134.77 | 2242.0364 | 20     | 2.3  | 1122.0281 | 2 | 34.42 | 2        | F2:1522  | OB5925 H3B raw.raw | 1.6845E7        | 19       | 17                  | 288   | 307 | Oxidation (M)        | M3:Oxidation (M):1000.00                                | PEAKS DB |
| K.NPQLQDLMMMLTC(+57.02)VEIK.E             | N    | 131.65 | 2046.9788 | 17     | -0.8 | 1024.4958 | 2 | 36.89 | 14       | F14:1903 | OB5941 H1 raw.raw  | 1.2559E7        | 8        | 8                   | 423   | 439 | Carbamidomethylation | C13:Carbamidomethylation:1000.00                        | PEAKS DB |
| K.NPQLQDLDM(+15.99)MLTC(+57.02)VEIK.E     | N    | 128.59 | 2062.9736 | 17     | -6.6 | 1032.4873 | 2 | 36.34 | 14       | F14:1860 | OB5941 H1 raw.raw  | 2.4371E5        | 2        | 2                   | 423   | 439 | Carbamidomethylation | M9:Oxidation (M):30.46;C13:Carbamidomethylation:1000.00 | PEAKS DB |
| K.KGSEEEGDITNPINLREGEPLSNFGL.L            | Y    | 126.17 | 3058.4478 | 28     | -3.6 | 1020.4862 | 3 | 31.46 | 14       | F14:1557 | OB5941 H1 raw.raw  | 5.2061E7        | 16       | 16                  | 386   | 413 |                      |                                                         | PEAKS DB |
| R.NTLEAAFAEFNEIR.R                        | N    | 126.11 | 1737.8322 | 15     | 3.3  | 869.9262  | 2 | 35.27 | 14       | F14:1792 | OB5941 H1 raw.raw  | 1.3691E7        | 6        | 6                   | 319   | 333 |                      |                                                         | PEAKS DB |
| K.HADADNILVIQQGQATVTVANGNNRK.S            | N    | 120.98 | 2746.4111 | 26     | 4.7  | 1374.2192 | 2 | 29.02 | 14       | F14:1406 | OB5941 H1 raw.raw  | 4.4412E7        | 13       | 13                  | 229   | 254 |                      |                                                         | PEAKS DB |
| K.KGSEEEGDITNPINLR.E                      | N    | 117.96 | 1770.8748 | 16     | -0.9 | 886.4438  | 2 | 28.67 | 14       | F14:1384 | OB5941 H1 raw.raw  | 2.1993E7        | 17       | 17                  | 386   | 401 |                      |                                                         | PEAKS DB |
| K.SFNLDEGHALRIPSGFISYILNR.H               | N    | 117.92 | 2618.3604 | 23     | 0.6  | 1310.1882 | 2 | 36.89 | 14       | F14:1902 | OB5941 H1 raw.raw  | 2.1092E8        | 40       | 39                  | 255   | 277 |                      |                                                         | PEAKS DB |
| R.VLLEENAGGEQEER.G                        | N    | 114.70 | 1571.7427 | 14     | 1.1  | 786.8795  | 2 | 26.65 | 14       | F14:1250 | OB5941 H1 raw.raw  | 1.2337E7        | 7        | 7                   | 335   | 348 |                      |                                                         | PEAKS DB |
| K.GSEEEGDITNPINLR.E                       | N    | 114.17 | 1642.7798 | 15     | 1.7  | 822.3986  | 2 | 30.60 | 14       | F14:1507 | OB5941 H1 raw.raw  | 8.7873E6        | 4        | 4                   | 387   | 401 |                      |                                                         | PEAKS DB |
| R.IFLAGDKDNVIDQIEKQAK.D                   | N    | 113.07 | 2144.1477 | 19     | 1.1  | 715.7240  | 3 | 32.93 | 7        | F7:1578  | OB5934 H3B raw.raw | 5.566E7         | 12       | 12                  | 541   | 559 |                      |                                                         | PEAKS DB |
| K.AMVIVVVNKG TGNLELVAVR.K                 | N    | 112.17 | 2081.2031 | 20     | 1.5  | 694.7427  | 3 | 34.35 | 14       | F14:1739 | OB5941 H1 raw.raw  | 7.0931E7        | 12       | 12                  | 452   | 471 |                      |                                                         | PEAKS DB |
| R.KSFNLDEGHALR.I                          | N    | 112.03 | 1385.7051 | 12     | 1.1  | 693.8606  | 2 | 25.70 | 14       | F14:1202 | OB5941 H1 raw.raw  | 3.2948E6        | 6        | 6                   | 254   | 265 |                      |                                                         | PEAKS DB |
| R.IPSGFISYILNR.H                          | N    | 111.89 | 1378.7609 | 12     | 1.5  | 690.3887  | 2 | 43.03 | 14       | F14:2242 | OB5941 H1 raw.raw  | 2.1426E8        | 15       | 15                  | 266   | 277 |                      |                                                         | PEAKS DB |
| R.DQSSYLQGF SR.N                          | N    | 110.94 | 1286.5891 | 11     | -1.4 | 644.3009  | 2 | 30.60 | 14       | F14:1505 | OB5941 H1 raw.raw  | 6.2405E7        | 21       | 21                  | 308   | 318 |                      |                                                         | PEAKS DB |
| K.NPQLQDLMMMLTC(+57.02)VEIKEGALMLPHFNSK.A | N    | 110.02 | 3371.6387 | 29     | -0.1 | 1686.8264 | 2 | 37.85 | 14       | F14:1946 | OB5941 H1 raw.raw  | 1.7936E8        | 14       | 14                  | 423   | 451 | Carbamidomethylation | C13:Carbamidomethylation:1000.00                        | PEAKS DB |
| K.AMVIVVVNKG TGNLELVAVRK.E                | N    | 109.98 | 2209.2981 | 21     | -1.4 | 1105.6548 | 2 | 32.55 | 14       | F14:1615 | OB5941 H1 raw.raw  | 2.9136E8        | 18       | 18                  | 452   | 472 |                      |                                                         | PEAKS DB |
| total 217 peptides                        |      |        |           |        |      |           |   |       |          |          |                    |                 |          |                     |       |     |                      |                                                         |          |

| Peptide                                | Uniq | -10lgP | Mass      | Length | ppm  | m/z       | z | RT    | Fraction | Scan     | Source File       | Area Raw in gel | #Feature | #Feature Raw in gel | Start | End | PTM                                   | AScore                                                   | Found By  |
|----------------------------------------|------|--------|-----------|--------|------|-----------|---|-------|----------|----------|-------------------|-----------------|----------|---------------------|-------|-----|---------------------------------------|----------------------------------------------------------|-----------|
| K.AM(+15.99)VIVVVNKG TGNLELVAVR.K      | N    | 109.59 | 2097.1980 | 20     | -2.2 | 1049.6040 | 2 | 32.73 | 14       | F14:1638 | OB5941 H1 raw.raw | 3.1537E7        | 10       | 10                  | 452   | 471 | Oxidation (M)                         | M2:Oxidation (M):100.0.00                                | PEAKS DB  |
| K.SFNLDEGHALR.I                        | N    | 109.41 | 1257.6101 | 11     | -3.3 | 629.8102  | 2 | 27.77 | 14       | F14:1329 | OB5941 H1 raw.raw | 7.2473E7        | 30       | 30                  | 255   | 265 |                                       |                                                          | PEAKS DB  |
| R.EGEQEWGTPGSHVR.E                     | N    | 108.42 | 1567.7015 | 14     | 0.5  | 784.8585  | 2 | 25.51 | 14       | F14:1193 | OB5941 H1 raw.raw | 5.0052E5        | 6        | 6                   | 153   | 166 |                                       |                                                          | PEAKS DB  |
| R.IFLAGDKDNVIDQIEK.Q                   | N    | 108.13 | 1816.9570 | 16     | 0.2  | 909.4860  | 2 | 33.10 | 14       | F14:1683 | OB5941 H1 raw.raw | 7.2865E8        | 41       | 41                  | 541   | 556 |                                       |                                                          | PEAKS DB  |
| R.KSFNLDEGHALRIPSGFISYILNR.H           | N    | 107.80 | 2746.4553 | 24     | -2.1 | 916.4905  | 3 | 36.16 | 12       | F12:1802 | OB5939 H1 raw.raw | 7.186E6         | 4        | 4                   | 254   | 277 |                                       |                                                          | PEAKS DB  |
| R.I(+57.02)PSGFISYILNR.H               | N    | 104.65 | 1435.7823 | 12     | -1.7 | 718.8972  | 2 | 36.52 | 14       | F14:1869 | OB5941 H1 raw.raw | 1.3017E7        | 3        | 3                   | 266   | 277 | Carbamidomethylation (DHKE, X@N-term) | I1:Carbamidomethylation (DHKE, X@N-term):1000.00         | PEAKS PTM |
| R.VLLEENAGGEQEERQR.R                   | N    | 104.46 | 1912.9238 | 17     | 1.8  | 957.4709  | 2 | 25.31 | 14       | F14:1182 | OB5941 H1 raw.raw | 1.9161E6        | 8        | 8                   | 335   | 351 |                                       |                                                          | PEAKS DB  |
| R.I(+57.02)FLAGDKDNVIDQIEK.Q           | N    | 103.96 | 1873.9785 | 16     | -5.0 | 937.9919  | 2 | 32.19 | 14       | F14:1619 | OB5941 H1 raw.raw | 4.5184E7        | 7        | 7                   | 541   | 556 | Carbamidomethylation (DHKE, X@N-term) | I1:Carbamidomethylation (DHKE, X@N-term):90.91           | PEAKS PTM |
| R.EGEPDLSNNFGK.L                       | Y    | 103.27 | 1305.5836 | 12     | 0.4  | 653.7994  | 2 | 27.95 | 14       | F14:1330 | OB5941 H1 raw.raw | 7.4849E6        | 3        | 3                   | 402   | 413 |                                       |                                                          | PEAKS DB  |
| K.QAKDLAFPGSGEQVEK.L                   | N    | 102.73 | 1702.8525 | 16     | 1.8  | 852.4351  | 2 | 26.85 | 14       | F14:1278 | OB5941 H1 raw.raw | 1.286E6         | 6        | 6                   | 557   | 572 |                                       |                                                          | PEAKS DB  |
| K.H(+57.02)ADADNILVIQQGQATVTVANGNNRK.S | N    | 102.10 | 2803.4324 | 26     | -1.3 | 935.4835  | 3 | 29.92 | 14       | F14:1452 | OB5941 H1 raw.raw | 1.6897E6        | 1        | 1                   | 229   | 254 |                                       | H1:Carbamidomethylation (DHKE, X@N-term):39.76           | PEAKS PTM |
| K.DLAFPGSGEQVEK.L                      | N    | 101.44 | 1375.6619 | 13     | -2.0 | 688.8369  | 2 | 30.08 | 14       | F14:1472 | OB5941 H1 raw.raw | 6.5563E7        | 9        | 9                   | 560   | 572 |                                       |                                                          | PEAKS DB  |
| K.GSEEEGDITNPINLREGEPLDLSNNFGK.L       | Y    | 101.39 | 2930.3530 | 27     | -3.6 | 1466.1785 | 2 | 31.62 | 13       | F13:1574 | OB5940 H1 raw.raw | 1.3299E7        | 8        | 8                   | 387   | 413 |                                       |                                                          | PEAKS DB  |
| K.NPQLQLDMLMTCVEIK(+14.02).E           | N    | 101.30 | 2003.9730 | 17     | 2.1  | 1002.9958 | 2 | 38.00 | 14       | F14:1960 | OB5941 H1 raw.raw | 6.7851E5        | 2        | 2                   | 423   | 439 | Methylation(KR)                       | K17:Methylation(KR):1000.00                              | PEAKS PTM |
| K.S(+57.02)FNLDDEGHALR.I               | N    | 100.96 | 1314.6316 | 11     | 0.8  | 658.3236  | 2 | 27.59 | 14       | F14:1340 | OB5941 H1 raw.raw | 5.6012E6        | 7        | 7                   | 255   | 265 | Carbamidomethylation (DHKE, X@N-term) | S1:Carbamidomethylation (DHKE, X@N-term):101.71          | PEAKS PTM |
| R.RVLLEENAGGEQEER.G                    | N    | 98.06  | 1727.8438 | 15     | 0.4  | 576.9554  | 3 | 24.77 | 13       | F13:1156 | OB5940 H1 raw.raw | 1.2517E5        | 5        | 5                   | 334   | 348 |                                       |                                                          | PEAKS DB  |
| R.IPSGFISYILNRHDNQNLN.R.V              | N    | 97.42  | 2256.1763 | 19     | 0.5  | 565.0516  | 4 | 33.66 | 14       | F14:1693 | OB5941 H1 raw.raw | 3.392E8         | 42       | 42                  | 266   | 284 |                                       |                                                          | PEAKS DB  |
| K.AM(+15.99)VIVVVNKG TGNLELVAVR.E      | N    | 96.33  | 2225.2930 | 21     | -0.4 | 1113.6533 | 2 | 30.76 | 14       | F14:1520 | OB5941 H1 raw.raw | 4.0787E7        | 8        | 7                   | 452   | 472 | Oxidation (M)                         | M2:Oxidation (M):100.0.00                                | PEAKS DB  |
| K.KNPQLQLDMM(+15.99)LTC(+57.02)VEIK.E  | N    | 95.01  | 2191.0686 | 18     | -3.4 | 1096.5378 | 2 | 32.73 | 14       | F14:1643 | OB5941 H1 raw.raw | 1.9787E5        | 1        | 1                   | 422   | 439 | Carbamidomethylation                  | M11:Oxidation (M):9.34;C14:Carbamidomethylation:100.0.00 | PEAKS DB  |
| K.NPQLQLDMM(-48.00)LTC(+57.02)VEIK.E   | N    | 93.52  | 1998.9755 | 17     | -2.5 | 1000.4926 | 2 | 32.55 | 14       | F14:1628 | OB5941 H1         | 1.3958E7        | 5        | 5                   | 423   | 439 | Carbamidomethylation                  | M10:Dethiomethyl:27.                                     | PEAKS PTM |
| total 217 peptides                     |      |        |           |        |      |           |   |       |          |          |                   |                 |          |                     |       |     |                                       |                                                          |           |

| Peptide                                           | Uniq | -10lgP | Mass      | Length | ppm  | m/z       | z | RT    | Fraction | Scan     | Source File        | Area Raw in gel | #Feature | #Feature Raw in gel | Start | End | PTM                                                                       | AScore                                                   | Found By  |
|---------------------------------------------------|------|--------|-----------|--------|------|-----------|---|-------|----------|----------|--------------------|-----------------|----------|---------------------|-------|-----|---------------------------------------------------------------------------|----------------------------------------------------------|-----------|
|                                                   |      |        |           |        |      |           |   |       |          |          | raw.raw            |                 |          |                     |       |     |                                                                           | 96;C13:Carbamidomethylation:1000.00                      |           |
| K.NPQLQLDLM(+15.99)MLTC(+57.02)VEIKEGALMLPHFNSK.A | N    | 92.22  | 3387.6335 | 29     | -1.5 | 1130.2168 | 3 | 36.17 | 14       | F14:1926 | OB5941 H1 raw.raw  | 2.8061E7        | 4        | 4                   | 423   | 451 | Carbamidomethylation                                                      | M9:Oxidation (M):10.11;C13:Carbamidomethylation:1000.00  | PEAKS DB  |
| R.NNPFYFPSRR.F                                    | N    | 92.08  | 1296.6364 | 10     | -3.0 | 649.3235  | 2 | 28.67 | 14       | F14:1408 | OB5941 H1 raw.raw  | 1.2788E8        | 21       | 21                  | 172   | 181 |                                                                           |                                                          | PEAKS DB  |
| K.EGALM(+15.99)LPHFNSK.A                          | N    | 91.98  | 1358.6653 | 12     | 2.1  | 680.3414  | 2 | 29.74 | 14       | F14:1443 | OB5941 H1 raw.raw  | 1.9561E6        | 3        | 3                   | 440   | 451 | Oxidation (M)                                                             | M5:Oxidation (M):1000.00                                 | PEAKS DB  |
| R.VLLEENAGGEQEERGQRR.W                            | N    | 91.09  | 2069.0249 | 18     | 2.1  | 690.6837  | 3 | 25.31 | 14       | F14:1186 | OB5941 H1 raw.raw  | 1.1888E6        | 3        | 3                   | 335   | 352 |                                                                           |                                                          | PEAKS DB  |
| K.KNPQLQLDMM(+15.99)LTC(+57.02)VEIKEGALMLPHFNSK.A | N    | 90.76  | 3515.7285 | 30     | -2.7 | 879.9370  | 4 | 34.52 | 13       | F13:1755 | OB5940 H1 raw.raw  | 2.6989E6        | 3        | 3                   | 422   | 451 | Carbamidomethylation                                                      | M11:Oxidation (M):30.46;C14:Carbamidomethylation:1000.00 | PEAKS DB  |
| K.AM(-48.00)VIVVVNKG TGNLELVAVR.K                 | N    | 90.57  | 2033.1997 | 20     | -3.4 | 1017.6036 | 2 | 31.46 | 14       | F14:1539 | OB5941 H1 raw.raw  | 1.6588E7        | 6        | 6                   | 452   | 471 | Dethiomethyl                                                              | M2:Dethiomethyl:1000.00                                  | PEAKS PTM |
| K.A(+57.02)MVIVVVNKG TGNLELVAVR.K                 | N    | 90.54  | 2138.2246 | 20     | -0.9 | 1070.1187 | 2 | 34.35 | 14       | F14:1737 | OB5941 H1 raw.raw  | 5.6414E6        | 3        | 3                   | 452   | 471 | Carbamidomethylation (DHKE, X@N-term)                                     | A1:Carbamidomethylation (DHKE, X@N-term):207.56          | PEAKS PTM |
| K.NPQLQLDMLMLTC(+57.02)VEIKEGALM(+15.99)LPHFNSK.A | N    | 90.37  | 3387.6335 | 29     | -1.5 | 1130.2168 | 3 | 36.17 | 14       | F14:1895 | OB5941 H1 raw.raw  | 3.1109E7        | 7        | 7                   | 423   | 451 | Carbamidomethylation; Oxidation (M)                                       | C13:Carbamidomethylation:1000.00;M22:Oxidation (M):69.89 | PEAKS DB  |
| K.H(+57.02)ADADNILVIQQGQATVTVAN(+.98)GNNRK.S      | N    | 90.07  | 2804.4165 | 26     | -1.3 | 935.8115  | 3 | 30.08 | 14       | F14:1476 | OB5941 H1 raw.raw  | 6.8084E6        | 2        | 2                   | 229   | 254 | H1:Carbamidomethylation (DHKE, X@N-term):45.01;N21:Deamidation (NQ):14.04 |                                                          | PEAKS PTM |
| R.IVQIEAKPNTLVLPK.H                               | N    | 89.51  | 1662.0079 | 15     | -3.4 | 832.0084  | 2 | 29.92 | 14       | F14:1456 | OB5941 H1 raw.raw  | 3.047E8         | 42       | 42                  | 214   | 228 |                                                                           |                                                          | PEAKS DB  |
| F.LAGDKDNVIDQIEK.Q                                | N    | 89.22  | 1556.8046 | 14     | -3.2 | 779.4071  | 2 | 32.19 | 12       | F12:1557 | OB5939 H1 raw.raw  | 4.4864E6        | 2        | 2                   | 543   | 556 |                                                                           |                                                          | PEAKS DB  |
| K.I(+57.02)SMPVNTPGQFEDFFPASSR.D                  | N    | 88.49  | 2283.0630 | 20     | -0.1 | 1142.5387 | 2 | 35.84 | 12       | F12:1793 | OB5939 H1 raw.raw  | 6.4772E5        | 1        | 1                   | 288   | 307 | Carbamidomethylation (DHKE, X@N-term)                                     | I1:Carbamidomethylation (DHKE, X@N-term):156.03          | PEAKS PTM |
| K.DLAFIGSGEQVEKLIK.N                              | N    | 87.96  | 1729.9249 | 16     | 1.0  | 865.9706  | 2 | 33.30 | 7        | F7:1601  | OB5934 H3B raw.raw | 6.2551E5        | 3        | 3                   | 560   | 575 |                                                                           |                                                          | PEAKS DB  |
| K.EGALMLPHFNSK.A                                  | N    | 87.95  | 1342.6703 | 12     | 2.5  | 672.3441  | 2 | 29.83 | 13       | F13:1462 | OB5940 H1 raw.raw  | 9.3502E6        | 3        | 3                   | 440   | 451 |                                                                           |                                                          | PEAKS DB  |
| K.HADADNILVIQQGQATVTVAN(+.98)GNNR.K               | N    | 87.06  | 2619.3000 | 25     | -1.2 | 1310.6558 | 2 | 30.35 | 13       | F13:1535 | OB5940 H1 raw.raw  | 4.8683E6        | 1        | 1                   | 229   | 253 |                                                                           | N21:Deamidation (NQ):7.32                                | PEAKS DB  |
| K.AMVIVVVNK.G                                     | N    | 86.97  | 971.5837  | 9      | 0.9  | 486.7996  | 2 | 29.88 | 12       | F12:1441 | OB5939 H1 raw.raw  | 9.5124E6        | 3        | 3                   | 452   | 460 |                                                                           |                                                          | PEAKS DB  |
| total 217 peptides                                |      |        |           |        |      |           |   |       |          |          |                    |                 |          |                     |       |     |                                                                           |                                                          |           |

| Peptide                                    | Uniq | -10lgP | Mass      | Length | ppm  | m/z       | z | RT    | Fraction | Scan     | Source File       | Area Raw in gel | #Feature | #Feature Raw in gel | Start | End | PTM                                   | AScore                                                   | Found By  |
|--------------------------------------------|------|--------|-----------|--------|------|-----------|---|-------|----------|----------|-------------------|-----------------|----------|---------------------|-------|-----|---------------------------------------|----------------------------------------------------------|-----------|
| R.SSENNEGIVIVK.V                           | Y    | 86.86  | 1174.5830 | 11     | -0.3 | 588.2986  | 2 | 23.31 | 14       | F14:1084 | OB5941 H1 raw.raw | 3.5114E5        | 6        | 6                   | 357   | 367 |                                       |                                                          | PEAKS DB  |
| K.GTGNLELVAVR.K                            | N    | 86.65  | 1127.6299 | 11     | -0.8 | 564.8218  | 2 | 29.74 | 14       | F14:1450 | OB5941 H1 raw.raw | 1.0907E7        | 6        | 6                   | 461   | 471 |                                       |                                                          | PEAKS DB  |
| R.NNPFYFPSR.R                              | N    | 86.37  | 1140.5352 | 9      | -3.8 | 571.2727  | 2 | 31.46 | 14       | F14:1552 | OB5941 H1 raw.raw | 1.201E7         | 5        | 5                   | 172   | 180 |                                       |                                                          | PEAKS DB  |
| K.HADADNILVIQQGQATVTVAN(-17.03)GNNRK.S     | N    | 86.12  | 2729.3845 | 26     | -1.1 | 910.8011  | 3 | 29.38 | 14       | F14:1429 | OB5941 H1 raw.raw | 8.2265E6        | 4        | 4                   | 229   | 254 | N21:Ammonia-loss (N):18.53            |                                                          | PEAKS PTM |
| R.NTLEAFAFNEFNEIRR.V                       | N    | 86.03  | 1893.9332 | 16     | -3.6 | 947.9705  | 2 | 35.28 | 12       | F12:1741 | OB5939 H1 raw.raw | 3.4229E8        | 38       | 38                  | 319   | 334 |                                       |                                                          | PEAKS DB  |
| R.I(+27.99)FLAGDKDNVIDQIEK.Q               | N    | 85.41  | 1844.9519 | 16     | 5.2  | 923.4880  | 2 | 36.16 | 14       | F14:1844 | OB5941 H1 raw.raw | 0               | 0        | 0                   | 541   | 556 | Formylation                           | I1:Formylation:77.93                                     | PEAKS PTM |
| K.SFNLDEGH(+57.02)ALR.I                    | N    | 84.87  | 1314.6316 | 11     | -1.2 | 658.3223  | 2 | 28.05 | 12       | F12:1298 | OB5939 H1 raw.raw | 5.1176E6        | 5        | 5                   | 255   | 265 |                                       | H8:Carbamidomethylation (DHKE, X@N-term):30.36           | PEAKS PTM |
| R.K(+57.02)SFNLDEGHALR.I                   | N    | 83.09  | 1442.7266 | 12     | -0.4 | 481.9159  | 3 | 25.70 | 14       | F14:1209 | OB5941 H1 raw.raw | 2.2174E5        | 3        | 3                   | 254   | 265 | Carbamidomethylation (DHKE, X@N-term) | K1:Carbamidomethylation (DHKE, X@N-term):51.63           | PEAKS PTM |
| K.SVSKKGSEEEGDITNPINLR.E                   | N    | 83.00  | 2172.1023 | 20     | 0.7  | 725.0419  | 3 | 27.21 | 14       | F14:1286 | OB5941 H1 raw.raw | 1.3065E5        | 2        | 2                   | 382   | 401 |                                       |                                                          | PEAKS DB  |
| K.KNPQLQDLDM(+15.99)MLTC(+57.02)VEIK.E     | N    | 81.54  | 2191.0686 | 18     | 0.7  | 1096.5424 | 2 | 33.03 | 12       | F12:1615 | OB5939 H1 raw.raw | 0               | 0        | 0                   | 422   | 439 | Carbamidomethylation                  | M10:Oxidation (M):14.02;C14:Carbamidomethylation:1000.00 | PEAKS DB  |
| K.KNPQLQDLDMMLTC(+57.02)VEIKEGALMLPHFNSK.A | N    | 81.26  | 3499.7336 | 30     | -0.1 | 875.9406  | 4 | 36.52 | 14       | F14:1868 | OB5941 H1 raw.raw | 1.091E7         | 3        | 3                   | 422   | 451 | Carbamidomethylation                  | C14:Carbamidomethylation:1000.00                         | PEAKS DB  |
| K.GTGNLELVAVRK.E                           | N    | 79.30  | 1255.7249 | 12     | 0.9  | 628.8702  | 2 | 26.85 | 14       | F14:1263 | OB5941 H1 raw.raw | 1.0437E7        | 9        | 9                   | 461   | 472 |                                       |                                                          | PEAKS DB  |
| R.I(+57.02)VQIEAKPNTLVLPK.H                | N    | 78.65  | 1719.0294 | 15     | 3.0  | 860.5245  | 2 | 30.75 | 12       | F12:1469 | OB5939 H1 raw.raw | 1.7854E7        | 5        | 5                   | 214   | 228 | Carbamidomethylation (DHKE, X@N-term) | I1:Carbamidomethylation (DHKE, X@N-term):97.69           | PEAKS PTM |
| R.EETSRNNPFYFPSRR.F                        | N    | 78.31  | 1898.9023 | 15     | 1.2  | 633.9755  | 3 | 27.17 | 13       | F13:1289 | OB5940 H1 raw.raw | 6.7264E6        | 6        | 6                   | 167   | 181 |                                       |                                                          | PEAKS DB  |
| R.IFLAGDKDNVIDQIE(+57.02)K.Q               | N    | 78.23  | 1873.9785 | 16     | -5.0 | 937.9919  | 2 | 32.19 | 14       | F14:1583 | OB5941 H1 raw.raw | 3.036E7         | 3        | 3                   | 541   | 556 |                                       | E15:Carbamidomethylation (DHKE, X@N-term):0.00           | PEAKS PTM |
| I.PSGFISYILNR.H                            | N    | 77.77  | 1265.6768 | 11     | 2.4  | 633.8472  | 2 | 36.17 | 13       | F13:1844 | OB5940 H1 raw.raw | 2.5204E5        | 2        | 2                   | 267   | 277 |                                       |                                                          | PEAKS DB  |
| I.FLAGDKDNVIDQIEK.Q                        | N    | 77.74  | 1703.8729 | 15     | -9.3 | 852.9358  | 2 | 32.01 | 14       | F14:1599 | OB5941 H1 raw.raw | 1.3574E6        | 3        | 3                   | 542   | 556 |                                       |                                                          | PEAKS DB  |
| K.D(+57.02)LAFIGSGEQVEK.L                  | N    | 77.21  | 1432.6833 | 13     | 3.8  | 717.3517  | 2 | 30.92 | 12       | F12:1485 | OB5939 H1 raw.raw | 2.816E5         | 1        | 1                   | 560   | 572 | Carbamidomethylation (DHKE, X@N-term) | D1:Carbamidomethylation (DHKE, X@N-term):93.18           | PEAKS PTM |
| K.K(+57.02)GSEEEGDITNPINLR.E               | N    | 77.19  | 1827.8962 | 16     | -3.2 | 914.9525  | 2 | 28.80 | 14       | F14:1391 | OB5941 H1 raw.raw | 0               | 0        | 0                   | 386   | 401 |                                       | K1:Carbamidomethylation (DHKE,                           | PEAKS PTM |
| total 217 peptides                         |      |        |           |        |      |           |   |       |          |          |                   |                 |          |                     |       |     |                                       |                                                          |           |

| Peptide                                          | Uniq | -10lgP | Mass      | Length | ppm  | m/z       | z | RT    | Fraction | Scan     | Source File        | Area Raw in gel | #Feature | #Feature Raw in gel | Start | End | PTM                  | AScore                                                                   | Found By  |
|--------------------------------------------------|------|--------|-----------|--------|------|-----------|---|-------|----------|----------|--------------------|-----------------|----------|---------------------|-------|-----|----------------------|--------------------------------------------------------------------------|-----------|
|                                                  |      |        |           |        |      |           |   |       |          |          |                    |                 |          |                     |       |     |                      | X@N-term):8.80                                                           |           |
| R.Q(-17.03)FQNLQNHR.I                            | N    | 76.65  | 1166.5581 | 9      | -1.5 | 584.2855  | 2 | 27.77 | 14       | F14:1319 | OB5941 H1 raw.raw  | 3.3996E6        | 3        | 3                   | 205   | 213 | Pyro-glu from Q      | Q1:Pyro-glu from Q:1000.00                                               | PEAKS PTM |
| K.KGSEEEGDITN(+.98)PINLREGEPDLSNNFGK.L           | Y    | 75.94  | 3059.4319 | 28     | 7.3  | 1530.7344 | 2 | 30.76 | 14       | F14:1523 | OB5941 H1 raw.raw  | 5.8148E5        | 1        | 1                   | 386   | 413 |                      | N11:Deamidation (NQ):10.86                                               | PEAKS DB  |
| K.HAD(+57.02)ADNILVIQQGQATVTVAN(+.98)GNNRK.S     | N    | 74.85  | 2804.4165 | 26     | -5.0 | 935.8081  | 3 | 28.96 | 13       | F13:1511 | OB5940 H1 raw.raw  | 3.7976E6        | 1        | 1                   | 229   | 254 |                      | D3:Carbamidomethylation (DHKE, X@N-term):6.59;N21:Deamidation (NQ):14.04 | PEAKS PTM |
| K.HADADNILVIQQGQATVTVANGN(-17.03)NRK.S           | N    | 74.65  | 2729.3845 | 26     | -3.3 | 1365.6951 | 2 | 29.38 | 14       | F14:1432 | OB5941 H1 raw.raw  | 5.4978E5        | 1        | 1                   | 229   | 254 |                      | N23:Ammonia-loss (N):0.00                                                | PEAKS PTM |
| K.ISMPVNTPGQFEDFFPASSRDQSSYLQGFSR.N              | N    | 74.49  | 3494.6201 | 31     | 2.7  | 1165.8838 | 3 | 36.29 | 2        | F2:1620  | OB5925 H3B raw.raw | 9.3886E7        | 15       | 15                  | 288   | 318 |                      |                                                                          | PEAKS DB  |
| R.NTLEAAFAEFN(+.98)EIRR.V                        | N    | 74.39  | 1894.9172 | 16     | -3.7 | 948.4624  | 2 | 32.73 | 14       | F14:1640 | OB5941 H1 raw.raw  | 4.113E6         | 3        | 3                   | 319   | 334 | Deamidation (NQ)     | N12:Deamidation (NQ):55.21                                               | PEAKS DB  |
| K.LFEVKPKKPNQLQDLDMMLTC(+57.02)VEIK.E            | N    | 73.38  | 3131.6069 | 26     | 3.7  | 1044.8801 | 3 | 33.97 | 13       | F13:1716 | OB5940 H1 raw.raw  | 3.7487E6        | 3        | 3                   | 414   | 439 | Carbamidomethylation | C22:Carbamidomethylation:1000.00                                         | PEAKS DB  |
| K.NPQLQDLDMM(+15.99)LTC(+57.02)VEIKEGALMLPHFSK.A | N    | 73.21  | 3387.6335 | 29     | 5.6  | 847.9204  | 4 | 35.82 | 13       | F13:1825 | OB5940 H1 raw.raw  | 9.6415E6        | 3        | 3                   | 423   | 451 | Carbamidomethylation | M10:Oxidation (M):16.90;C13:Carbamidomethylation:1000.00                 | PEAKS DB  |
| A.GDKDNVIDQIEK.Q                                 | N    | 73.04  | 1372.6833 | 12     | -2.8 | 687.3470  | 2 | 32.19 | 12       | F12:1561 | OB5939 H1 raw.raw  | 1.4449E6        | 3        | 3                   | 545   | 556 |                      |                                                                          | PEAKS DB  |
| R.V(+57.02)LLEENAGGEQEER.G                       | N    | 73.00  | 1628.7642 | 14     | 1.1  | 815.3903  | 2 | 27.03 | 14       | F14:1288 | OB5941 H1 raw.raw  | 2.7852E5        | 3        | 3                   | 335   | 348 |                      | V1:Carbamidomethylation (DHKE, X@N-term):44.44                           | PEAKS PTM |
| R.EETSRNPNFYFPSR.R                               | N    | 72.75  | 1742.8011 | 14     | -0.9 | 581.9405  | 3 | 29.89 | 12       | F12:1419 | OB5939 H1 raw.raw  | 4.0306E4        | 1        | 1                   | 167   | 180 |                      |                                                                          | PEAKS DB  |
| R.IPSGFISYILN(-17.03)R.H                         | N    | 72.57  | 1361.7343 | 12     | 1.4  | 681.8754  | 2 | 37.47 | 13       | F13:1926 | OB5940 H1 raw.raw  | 5.3561E5        | 2        | 2                   | 266   | 277 | Ammonia-loss (N)     | N11:Ammonia-loss (N):1000.00                                             | PEAKS PTM |
| R.IPSGFISY(+125.90)ILNR.H                        | N    | 72.49  | 1504.6575 | 12     | 1.5  | 753.3372  | 2 | 37.84 | 13       | F13:1946 | OB5940 H1 raw.raw  | 9.8379E5        | 2        | 2                   | 266   | 277 | Iodination           | Y8:Iodination:1000.00                                                    | PEAKS PTM |
| R.IPSGFISYILNRH(+57.02)DNQNL.R.V                 | N    | 72.20  | 2313.1978 | 19     | 2.0  | 579.3079  | 4 | 33.29 | 12       | F12:1633 | OB5939 H1 raw.raw  | 3.81E7          | 4        | 4                   | 266   | 284 |                      | H13:Carbamidomethylation (DHKE, X@N-term):9.34                           | PEAKS PTM |
| R.VLLEEN(+.98)AGGEQEER.G                         | N    | 71.59  | 1572.7267 | 14     | -3.7 | 787.3677  | 2 | 26.82 | 13       | F13:1276 | OB5940 H1 raw.raw  | 0               | 0        | 0                   | 335   | 348 | Deamidation (NQ)     | N6:Deamidation (NQ):71.64                                                | PEAKS DB  |
| A.FPGSGEQVEK.L                                   | N    | 71.45  | 1076.5138 | 10     | 5.5  | 539.2672  | 2 | 30.23 | 12       | F12:1449 | OB5939 H1 raw.raw  | 6.1112E4        | 1        | 1                   | 563   | 572 |                      |                                                                          | PEAKS DB  |
| total 217 peptides                               |      |        |           |        |      |           |   |       |          |          |                    |                 |          |                     |       |     |                      |                                                                          |           |

| Peptide                                                | Uniq | -10lgP | Mass      | Length | ppm  | m/z       | z | RT    | Fraction | Scan     | Source File        | Area Raw in gel | #Feature | #Feature Raw in gel | Start | End | PTM                                   | AScore                                                                                 | Found By  |
|--------------------------------------------------------|------|--------|-----------|--------|------|-----------|---|-------|----------|----------|--------------------|-----------------|----------|---------------------|-------|-----|---------------------------------------|----------------------------------------------------------------------------------------|-----------|
| R.E(-18.01)GE(+57.02)QEWGTPGSHVR.E                     | N    | 71.00  | 1606.7124 | 14     | 0.1  | 804.3635  | 2 | 27.42 | 14       | F14:1300 | OB5941 H1 raw.raw  | 8.0689E4        | 3        | 3                   | 153   | 166 | Pyro-glu from E                       | E1:Pyro-glu from E:100.0.00;E3:Carbamidomethylation (DHKE, X@N-term):45.01             | PEAKS PTM |
| K.A(+57.02)MVIVVVNKG TGNLELVAVRK.E                     | N    | 70.77  | 2266.3196 | 21     | -1.6 | 1134.1653 | 2 | 32.33 | 13       | F13:1602 | OB5940 H1 raw.raw  | 4.861E7         | 6        | 6                   | 452   | 472 | Carbamidomethylation (DHKE, X@N-term) | A1:Carbamidomethylation (DHKE, X@N-term):161.20                                        | PEAKS PTM |
| K.AM(+15.99)VIVVVNK.G                                  | N    | 70.64  | 987.5787  | 9      | 0.7  | 494.7969  | 2 | 26.66 | 14       | F14:1257 | OB5941 H1 raw.raw  | 8.6431E5        | 3        | 3                   | 452   | 460 | Oxidation (M)                         | M2:Oxidation (M):100.0.00                                                              | PEAKS DB  |
| K.KNPQLQDLDMMLTC(+57.02)VEIKEGALM(+15.99)LPHFNSK.A     | N    | 70.55  | 3515.7285 | 30     | -0.8 | 879.9387  | 4 | 35.84 | 12       | F12:1790 | OB5939 H1 raw.raw  | 4.7958E6        | 2        | 2                   | 422   | 451 | Carbamidomethylation; Oxidation (M)   | C14:Carbamidomethylation:1000.00;M23:Oxidation (M):69.38                               | PEAKS DB  |
| K.VSKEHVEELTK.H                                        | N    | 69.86  | 1297.6877 | 11     | 0.8  | 433.5702  | 3 | 24.82 | 12       | F12:1120 | OB5939 H1 raw.raw  | 1.1162E5        | 6        | 6                   | 368   | 378 |                                       |                                                                                        | PEAKS DB  |
| Q.GQATVTVAN(+.98)GNNRK.S                               | N    | 69.60  | 1429.7273 | 14     | -4.1 | 715.8680  | 2 | 29.38 | 14       | F14:1424 | OB5941 H1 raw.raw  | 5.134E5         | 2        | 2                   | 241   | 254 |                                       | N9:Deamidation (NQ):41.83                                                              | PEAKS DB  |
| R.NT(-18.01)LEAAFAEFNEIRR.V                            | N    | 68.32  | 1875.9227 | 16     | -3.2 | 626.3129  | 3 | 33.81 | 14       | F14:1704 | OB5941 H1 raw.raw  | 1.3248E7        | 3        | 3                   | 319   | 334 | Dehydration                           | T2:Dehydration:1000.00                                                                 | PEAKS PTM |
| R.SSEN(+.98)NEGVIK.V                                   | Y    | 68.21  | 1175.5670 | 11     | 0.8  | 588.7913  | 2 | 24.17 | 14       | F14:1126 | OB5941 H1 raw.raw  | 1.8176E4        | 2        | 2                   | 357   | 367 |                                       | N4:Deamidation (NQ):20.00                                                              | PEAKS DB  |
| R.SRQFQNLQNHR.I                                        | N    | 67.97  | 1426.7178 | 11     | -0.3 | 476.5797  | 3 | 24.94 | 14       | F14:1159 | OB5941 H1 raw.raw  | 1.4052E4        | 2        | 2                   | 203   | 213 |                                       |                                                                                        | PEAKS DB  |
| K.LFEVKPDKKNPQLQDLDM(+15.99)M(+15.99)LTC(+57.02)VEIK.E | N    | 67.75  | 3163.5967 | 26     | 2.1  | 791.9081  | 4 | 32.37 | 12       | F12:1585 | OB5939 H1 raw.raw  | 6.2675E5        | 1        | 1                   | 414   | 439 | Oxidation (M); Carbamidomethylation   | M18:Oxidation (M):100.0.00;M19:Oxidation (M):1000.00;C22:Carbamidomethylation:100.0.00 | PEAKS DB  |
| L.AGDKDNVIDQIEK.Q                                      | N    | 66.85  | 1443.7205 | 13     | -3.1 | 722.8653  | 2 | 32.19 | 12       | F12:1560 | OB5939 H1 raw.raw  | 7.0907E5        | 2        | 2                   | 544   | 556 |                                       |                                                                                        | PEAKS DB  |
| K.G(+57.02)TGNLELVAVRK.E                               | N    | 66.68  | 1312.7462 | 12     | -0.7 | 657.3799  | 2 | 26.85 | 14       | F14:1280 | OB5941 H1 raw.raw  | 3.417E5         | 3        | 3                   | 461   | 472 | Carbamidomethylation (DHKE, X@N-term) | G1:Carbamidomethylation (DHKE, X@N-term):56.51                                         | PEAKS PTM |
| K.SFNLDEGHALRIPSGFISYILNRHDNQNL.R.V                    | N    | 66.45  | 3495.7759 | 30     | -1.2 | 700.1616  | 5 | 36.31 | 13       | F13:1855 | OB5940 H1 raw.raw  | 1.2605E8        | 16       | 16                  | 255   | 284 |                                       |                                                                                        | PEAKS DB  |
| R.QFQNLQNHR.I                                          | N    | 66.40  | 1183.5846 | 9      | 0.2  | 592.7997  | 2 | 24.53 | 14       | F14:1134 | OB5941 H1 raw.raw  | 7.3427E4        | 5        | 5                   | 205   | 213 |                                       |                                                                                        | PEAKS DB  |
| D.KDNVIDQIEK.Q                                         | N    | 66.36  | 1200.6350 | 10     | -0.8 | 601.3243  | 2 | 25.89 | 14       | F14:1225 | OB5941 H1 raw.raw  | 5.8609E4        | 3        | 3                   | 547   | 556 |                                       |                                                                                        | PEAKS DB  |
| K.NPQLQ(+.98)DLDMMLTC(+57.02)VEIKEGALMLPHFNSK.A        | N    | 66.16  | 3372.6226 | 29     | 5.7  | 1125.2212 | 3 | 37.84 | 13       | F13:1936 | OB5940 H1 raw.raw  | 5.3127E7        | 3        | 3                   | 423   | 451 | Carbamidomethylation                  | Q5:Deamidation (NQ):32.28;C13:Carbamidomethylation:1000.00                             | PEAKS DB  |
| K.HADADNIIIVQQGQATVTVANGNN(+.98)RK.S                   | N    | 65.93  | 2747.3950 | 26     | 4.5  | 1374.7109 | 2 | 29.70 | 10       | F10:1444 | OB5937 H3A raw.raw | 5.6818E5        | 3        | 3                   | 229   | 254 |                                       | N24:Deamidation (NQ):14.02                                                             | PEAKS DB  |
| total 217 peptides                                     |      |        |           |        |      |           |   |       |          |          |                    |                 |          |                     |       |     |                                       |                                                                                        |           |

| Peptide                                                   | Uniq | -10lgP | Mass      | Length | ppm  | m/z       | z | RT    | Fraction | Scan     | Source File       | Area Raw in gel | #Feature | #Feature Raw in gel | Start | End | PTM                                                  | AScore                                                                          | Found By  |
|-----------------------------------------------------------|------|--------|-----------|--------|------|-----------|---|-------|----------|----------|-------------------|-----------------|----------|---------------------|-------|-----|------------------------------------------------------|---------------------------------------------------------------------------------|-----------|
| K.ISMPVNTPGQ(+.98)FEDFFPASSR.D                            | N    | 65.70  | 2227.0254 | 20     | 6.4  | 1114.5271 | 2 | 63.55 | 14       | F14:3427 | OB5941 H1 raw.raw | 1.0155E4        | 2        | 2                   | 288   | 307 |                                                      | Q10:Deamidation (NQ):33.26                                                      | PEAKS DB  |
| R.N(+.98)TLEAAFNAEFNEIRR.V                                | N    | 65.61  | 1894.9172 | 16     | 2.2  | 948.4680  | 2 | 35.88 | 12       | F12:1787 | OB5939 H1 raw.raw | 7.0859E7        | 1        | 1                   | 319   | 334 | Deamidation (NQ)                                     | N1:Deamidation (NQ):61.82                                                       | PEAKS DB  |
| K.KNPQLQDLDM(+15.99)MLTC(+57.02)VEIKEGALMLPHFNSK.A        | N    | 65.47  | 3515.7285 | 30     | -3.1 | 879.9366  | 4 | 35.44 | 13       | F13:1830 | OB5940 H1 raw.raw | 7.2415E6        | 3        | 3                   | 422   | 451 | Carbamidomethylation                                 | M10:Oxidation (M):11.06;C14:Carbamidomethylation:1000.00                        | PEAKS DB  |
| K.ISM(+15.99)PVNTPGQ(+.98)FEDFFPASSRDQSSYLQGFSR.N         | N    | 65.25  | 3511.5989 | 31     | 4.3  | 1171.5453 | 3 | 34.92 | 12       | F12:1731 | OB5939 H1 raw.raw | 1.4851E6        | 1        | 1                   | 288   | 318 | Oxidation (M)                                        | M3:Oxidation (M):100.00;Q10:Deamidation (NQ):27.62                              | PEAKS DB  |
| K.NPQLQDLDM(+15.99)MLTC(+57.02)VEIKEGALM(+15.99)LPHFNSK.A | N    | 64.53  | 3403.6284 | 29     | 4.5  | 1135.5552 | 3 | 36.52 | 14       | F14:1873 | OB5941 H1 raw.raw | 4.3451E6        | 3        | 3                   | 423   | 451 | Carbamidomethylation; Oxidation (M)                  | M9:Oxidation (M):10.11;C13:Carbamidomethylation:1000.00;M22:Oxidation (M):53.09 | PEAKS DB  |
| K.LFEVKPKD.K                                              | N    | 63.66  | 974.5436  | 8      | 0.9  | 488.2795  | 2 | 25.40 | 12       | F12:1153 | OB5939 H1 raw.raw | 6.8606E5        | 7        | 7                   | 414   | 421 |                                                      |                                                                                 | PEAKS DB  |
| F.NLDEGHALR.I                                             | N    | 63.51  | 1023.5097 | 9      | 2.3  | 512.7633  | 2 | 27.35 | 13       | F13:1309 | OB5940 H1 raw.raw | 1.5878E6        | 3        | 3                   | 257   | 265 |                                                      |                                                                                 | PEAKS DB  |
| V.QIEAKPNTLVLPK.H                                         | N    | 63.24  | 1449.8555 | 13     | -3.5 | 725.9325  | 2 | 29.92 | 14       | F14:1467 | OB5941 H1 raw.raw | 1.2653E6        | 3        | 3                   | 216   | 228 |                                                      |                                                                                 | PEAKS DB  |
| R.EGEQEWGTPGSHVREETS.R                                    | N    | 63.23  | 2169.9675 | 19     | 2.1  | 724.3313  | 3 | 25.88 | 14       | F14:1208 | OB5941 H1 raw.raw | 2.2911E6        | 7        | 7                   | 153   | 171 |                                                      |                                                                                 | PEAKS DB  |
| K.ISM(-48.00)PVNTPGQFEDFFPASSR.D                          | N    | 62.93  | 2178.0381 | 20     | 0.2  | 727.0201  | 3 | 32.37 | 12       | F12:1577 | OB5939 H1 raw.raw | 2.6788E7        | 5        | 5                   | 288   | 307 | Dethiomethyl                                         | M3:Dethiomethyl:100.00                                                          | PEAKS PTM |
| N.TPGQFEDFFPASSR.D                                        | N    | 62.85  | 1584.7208 | 14     | -0.2 | 793.3676  | 2 | 35.63 | 14       | F14:1821 | OB5941 H1 raw.raw | 2.1663E5        | 1        | 1                   | 294   | 307 |                                                      |                                                                                 | PEAKS DB  |
| K.A(+57.02)M(+15.99)VIVVVNKGTLNELVAVR.K                   | N    | 62.49  | 2154.2195 | 20     | -0.1 | 1078.1169 | 2 | 32.92 | 12       | F12:1614 | OB5939 H1 raw.raw | 4.5509E5        | 2        | 2                   | 452   | 471 | Carbamidomethylation (DHKE, X@N-term); Oxidation (M) | A1:Carbamidomethylation (DHKE, X@N-term):139.69; M2:Oxidation (M):100.00        | PEAKS PTM |
| L.EAAFNAEFNEIRR.V                                         | N    | 62.30  | 1565.7585 | 13     | -4.7 | 783.8829  | 2 | 34.06 | 12       | F12:1677 | OB5939 H1 raw.raw | 6.1232E5        | 1        | 1                   | 322   | 334 |                                                      |                                                                                 | PEAKS DB  |
| K.N(+.98)PQLQDLDMMLTC(+57.02)VEIKEGALMLPHFNSK.A           | N    | 61.86  | 3372.6226 | 29     | 5.7  | 1125.2212 | 3 | 37.84 | 13       | F13:1983 | OB5940 H1 raw.raw | 1.2903E7        | 1        | 1                   | 423   | 451 | Carbamidomethylation                                 | N1:Deamidation (NQ):14.04;C13:Carbamidomethylation:1000.00                      | PEAKS DB  |
| K.HADADNILVIQGGQ(+.98)ATVTVAN(+.98)GNNRK.S                | N    | 61.75  | 2748.3792 | 26     | 1.4  | 1375.1987 | 2 | 29.55 | 13       | F13:1443 | OB5940 H1 raw.raw | 4.856E5         | 1        | 1                   | 229   | 254 |                                                      | Q14:Deamidation (NQ):32.28;N21:Deamidation (NQ):14.04                           | PEAKS DB  |
| N.LDEGHALR.I                                              | N    | 60.44  | 909.4668  | 8      | 0.6  | 455.7409  | 2 | 27.35 | 13       | F13:1312 | OB5940 H1 raw.raw | 3.1152E4        | 1        | 1                   | 258   | 265 |                                                      |                                                                                 | PEAKS DB  |
| R.WGPAGPR.E                                               | N    | 59.30  | 739.3765  | 7      | -0.2 | 370.6955  | 2 | 24.50 | 13       | F13:1143 | OB5940 H1 raw.raw | 2.137E5         | 2        | 2                   | 115   | 121 |                                                      |                                                                                 | PEAKS DB  |
| total 217 peptides                                        |      |        |           |        |      |           |   |       |          |          |                   |                 |          |                     |       |     |                                                      |                                                                                 |           |



| Peptide                                          | Uniq | -10lgP | Mass      | Length | ppm  | m/z       | z | RT    | Fraction | Scan     | Source File        | Area Raw in gel | #Feature | #Feature Raw in gel | Start | End | PTM                                   | AScore                                                                           | Found By  |
|--------------------------------------------------|------|--------|-----------|--------|------|-----------|---|-------|----------|----------|--------------------|-----------------|----------|---------------------|-------|-----|---------------------------------------|----------------------------------------------------------------------------------|-----------|
| R.IFLAGDKDNVIDQ(+.98)IEKQAK.D                    | N    | 58.72  | 2145.1316 | 19     | 9.3  | 716.0578  | 3 | 32.93 | 2        | F2:1432  | OB5925 H3B raw.raw | 1.5596E6        | 1        | 1                   | 541   | 559 |                                       | Q13:Deamidation (NQ):0.00                                                        | PEAKS DB  |
| K.HADADNILVIQ(+.98)Q(+.98)GQATVTVAN(+.98)GNNRK.S | N    | 58.62  | 2749.3630 | 26     | 9.6  | 917.4705  | 3 | 30.18 | 13       | F13:1524 | OB5940 H1 raw.raw  | 4.3812E6        | 1        | 1                   | 229   | 254 |                                       | Q11:Deamidation (NQ):26.52;Q12:Deamidation (NQ):18.53;N21:Deamidation (NQ):14.04 | PEAKS DB  |
| R.D(+57.02)QSSYLQGFSR.N                          | N    | 58.49  | 1343.6106 | 11     | -2.5 | 672.8109  | 2 | 31.19 | 12       | F12:1506 | OB5939 H1 raw.raw  | 3.7713E4        | 1        | 1                   | 308   | 318 | Carbamidomethylation (DHKE, X@N-term) | D1:Carbamidomethylation (DHKE, X@N-term):1000.00                                 | PEAKS PTM |
| K.HADADNILVIQ(+.98)QGQATVTVAN(+.98)GNNRK.S       | N    | 58.29  | 2748.3792 | 26     | 4.6  | 1375.2031 | 2 | 31.28 | 12       | F12:1539 | OB5939 H1 raw.raw  | 1.8636E5        | 1        | 1                   | 229   | 254 |                                       | Q11:Deamidation (NQ):15.10;N21:Deamidation (NQ):17.01                            | PEAKS DB  |
| K.HADADN(+.98)ILVIQ(+.98)QGQATVTVANGNNRK.S       | N    | 57.75  | 2748.3792 | 26     | 3.1  | 1375.2010 | 2 | 30.08 | 14       | F14:1495 | OB5941 H1 raw.raw  | 1.5756E6        | 1        | 1                   | 229   | 254 |                                       | N6:Deamidation (NQ):0.00;Q11:Deamidation (NQ):0.00                               | PEAKS DB  |
| N.PFYFPSRR.F                                     | N    | 57.72  | 1068.5504 | 8      | 3.3  | 535.2842  | 2 | 28.95 | 12       | F12:1360 | OB5939 H1 raw.raw  | 3.0845E6        | 3        | 3                   | 174   | 181 |                                       |                                                                                  | PEAKS DB  |
| K.LFEVKPKKNPQLQDLDMM(+15.99)LTC(+57.02)VEIK.E    | N    | 57.62  | 3147.6018 | 26     | -4.4 | 787.9042  | 4 | 32.55 | 14       | F14:1633 | OB5941 H1 raw.raw  | 2.1102E6        | 3        | 3                   | 414   | 439 | Carbamidomethylation                  | M19:Oxidation (M):17.01;C22:Carbamidomethylation:1000.00                         | PEAKS DB  |
| K.SFN(+.98)LDEGHALRIPSGFISYILNR.H                | N    | 57.28  | 2619.3445 | 23     | 9.3  | 655.8495  | 4 | 38.22 | 12       | F12:1947 | OB5939 H1 raw.raw  | 1.0265E6        | 2        | 2                   | 255   | 277 |                                       | N3:Deamidation (NQ):32.08                                                        | PEAKS DB  |
| K.KGSEEGDITNPIN(+.98)LREGPDLSNNFGK.L             | Y    | 57.09  | 3059.4319 | 28     | 7.3  | 1530.7344 | 2 | 30.76 | 14       | F14:1531 | OB5941 H1 raw.raw  | 5.8148E5        | 1        | 1                   | 386   | 413 |                                       | N14:Deamidation (NQ):35.60                                                       | PEAKS DB  |
| K.AMVIVVVN(+.98)KGTGNLELVAVRK.E                  | N    | 56.84  | 2210.2820 | 21     | 9.6  | 737.7750  | 3 | 33.10 | 14       | F14:1664 | OB5941 H1 raw.raw  | 8.0625E6        | 2        | 2                   | 452   | 472 |                                       | N8:Deamidation (NQ):41.87                                                        | PEAKS DB  |
| K.KNPQLQDLDMM(-48.00)LTC(+57.02)VEIK.E           | N    | 56.43  | 2127.0703 | 18     | 0.8  | 710.0312  | 3 | 31.11 | 14       | F14:1538 | OB5941 H1 raw.raw  | 3.3192E6        | 2        | 2                   | 422   | 439 | Carbamidomethylation                  | M11:Dethiomethyl:14.02;C14:Carbamidomethylation:1000.00                          | PEAKS PTM |
| K.ISM(+15.99)PVNTPGQFEDFFPASSRDQSSYLQGFSR.N      | N    | 56.19  | 3510.6150 | 31     | 2.9  | 1171.2157 | 3 | 34.90 | 14       | F14:1765 | OB5941 H1 raw.raw  | 1.0055E7        | 8        | 8                   | 288   | 318 | Oxidation (M)                         | M3:Oxidation (M):1000.00                                                         | PEAKS DB  |
| R.IVQIEAK(+57.02)PNTLVLPK.H                      | N    | 56.13  | 1719.0294 | 15     | -1.6 | 860.5206  | 2 | 30.60 | 14       | F14:1466 | OB5941 H1 raw.raw  | 1.1048E7        | 2        | 2                   | 214   | 228 | Carbamidomethylation (DHKE, X@N-term) | K7:Carbamidomethylation (DHKE, X@N-term):51.51                                   | PEAKS PTM |
| K.IRPEGREGEGEWGTPGSHVR.E                         | N    | 56.05  | 2276.1045 | 20     | 0.7  | 570.0338  | 4 | 26.47 | 14       | F14:1255 | OB5941 H1 raw.raw  | 1.8795E5        | 1        | 1                   | 147   | 166 |                                       |                                                                                  | PEAKS DB  |
| R.N(+57.02)NPFYFPSRR.F                           | N    | 55.47  | 1353.6577 | 10     | -2.6 | 677.8344  | 2 | 29.38 | 14       | F14:1433 | OB5941 H1 raw.raw  | 6.1234E5        | 2        | 2                   | 172   | 181 | Carbamidomethylation (DHKE, X@N-term) | N1:Carbamidomethylation (DHKE, X@N-term):1000.00                                 | PEAKS PTM |
| K.HADADNILVIQQGQATVTVANGN(+.98)NRK.S             | N    | 55.13  | 2747.3950 | 26     | 4.2  | 687.8589  | 4 | 29.51 | 12       | F12:1401 | OB5939 H1 raw.raw  | 2.4633E7        | 5        | 5                   | 229   | 254 |                                       | N23:Deamidation (NQ):17.01                                                       | PEAKS DB  |
| total 217 peptides                               |      |        |           |        |      |           |   |       |          |          |                    |                 |          |                     |       |     |                                       |                                                                                  |           |

| Peptide                                                       | Uniq | -10lgP | Mass      | Length | ppm  | m/z       | z | RT    | Fraction | Scan     | Source File       | Area Raw in gel | #Feature | #Feature Raw in gel | Start | End | PTM                                    | AScore                                                                              | Found By  |
|---------------------------------------------------------------|------|--------|-----------|--------|------|-----------|---|-------|----------|----------|-------------------|-----------------|----------|---------------------|-------|-----|----------------------------------------|-------------------------------------------------------------------------------------|-----------|
| K.HADADNILVIQQ(+.98)GQ(+.98)ATVTVAN(+.98)GNNRK.S              | N    | 55.12  | 2749.3630 | 26     | 9.6  | 917.4705  | 3 | 30.18 | 13       | F13:1487 | OB5940 H1 raw.raw | 4.3812E6        | 1        | 1                   | 229   | 254 |                                        | Q12:Deamidation (N Q):14.02;Q14:Deamidation (NQ):13.03;N21:Deamidation (NQ):11.10   | PEAKS DB  |
| K.AM(-48.00)VIVVVNKGSGNLELVAVRK.E                             | N    | 54.93  | 2161.2947 | 21     | 1.4  | 1081.6561 | 2 | 29.80 | 14       | F14:1453 | OB5941 H1 raw.raw | 1.7581E6        | 2        | 2                   | 452   | 472 | Dethiomethyl                           | M2:Dethiomethyl:100.00                                                              | PEAKS PTM |
| K.NPQLQDLDM(+15.99)MLTC(+57.02)VEIKEGALMLPHFN(+.98)SK.A       | N    | 54.06  | 3388.6174 | 29     | 5.0  | 848.1659  | 4 | 36.17 | 14       | F14:1849 | OB5941 H1 raw.raw | 6.0156E6        | 2        | 2                   | 423   | 451 | Carbamidomethylation; Deamidation (NQ) | M9:Oxidation (M):14.02;C13:Carbamidomethylation:10.00.00;N27:Deamidation (NQ):58.23 | PEAKS DB  |
| R.IFLAGDKDNVIDQIE(+57.02)KQAK.D                               | N    | 52.99  | 2201.1692 | 19     | -2.0 | 734.7289  | 3 | 31.83 | 13       | F13:1588 | OB5940 H1 raw.raw | 3.3379E6        | 2        | 2                   | 541   | 559 |                                        | E15:Carbamidomethylation (DHKE, X@N-term):12.28                                     | PEAKS PTM |
| K.NPQLQDLDMMLTC(+57.02)VEIKEGALMLPHFN(+.98)SK.A               | N    | 52.89  | 3372.6226 | 29     | 7.4  | 844.1691  | 4 | 37.85 | 13       | F13:1914 | OB5940 H1 raw.raw | 5.2564E7        | 2        | 2                   | 423   | 451 | Carbamidomethylation; Deamidation (NQ) | C13:Carbamidomethylation:1000.00;N27:Deamidation (NQ):61.84                         | PEAKS DB  |
| K.HADADNILVIQQGQ(+.98)ATVTVANGNNRK.S                          | N    | 52.87  | 2747.3950 | 26     | 5.1  | 916.8103  | 3 | 44.47 | 12       | F12:2283 | OB5939 H1 raw.raw | 1.466E5         | 1        | 1                   | 229   | 254 |                                        | Q14:Deamidation (N Q):14.04                                                         | PEAKS DB  |
| K.NPQLQDLDM(+15.99)M(+15.99)LTC(+57.02)VEIKEGALMLPHFNSK.A     | N    | 52.70  | 3403.6284 | 29     | -4.3 | 1135.5452 | 3 | 35.63 | 14       | F14:1818 | OB5941 H1 raw.raw | 1.9434E6        | 2        | 2                   | 423   | 451 | Oxidation (M); Carbamidomethylation    | M9:Oxidation (M):49.75;M10:Oxidation (M):51.99;C13:Carbamidomethylation:1000.00     | PEAKS DB  |
| L.DEGHALR.I                                                   | N    | 52.68  | 796.3828  | 7      | 2.3  | 399.1996  | 2 | 27.87 | 12       | F12:1309 | OB5939 H1 raw.raw | 2.418E4         | 1        | 1                   | 259   | 265 |                                        |                                                                                     | PEAKS DB  |
| K.DLAFIGSGEQVEK(+57.02)LIK.N                                  | N    | 52.57  | 1786.9464 | 16     | -3.8 | 894.4771  | 2 | 32.91 | 14       | F14:1654 | OB5941 H1 raw.raw | 6.7177E5        | 1        | 1                   | 560   | 575 |                                        | K13:Carbamidomethylation (DHKE, X@N-term):27.96                                     | PEAKS PTM |
| K.KN(+.98)PQLQDLDMM(+15.99)LTC(+57.02)VEIK.E                  | N    | 52.31  | 2192.0527 | 18     | 9.2  | 1097.0437 | 2 | 32.33 | 13       | F13:1621 | OB5940 H1 raw.raw | 8.5775E4        | 1        | 1                   | 422   | 439 | Carbamidomethylation                   | N2:Deamidation (NQ):14.04;M11:Oxidation (M):0.00;C14:Carbamidomethylation:1000.00   | PEAKS DB  |
| R.IVQIEAKPNTLVLPK(+57.02).H                                   | N    | 52.13  | 1719.0294 | 15     | 3.0  | 860.5245  | 2 | 30.75 | 12       | F12:1437 | OB5939 H1 raw.raw | 4.8623E6        | 1        | 1                   | 214   | 228 |                                        | K15:Carbamidomethylation (DHKE, X@N-term):25.69                                     | PEAKS PTM |
| Q.GQATVTVANGNNRK.S                                            | N    | 51.97  | 1428.7433 | 14     | -0.2 | 715.3788  | 2 | 29.02 | 14       | F14:1412 | OB5941 H1 raw.raw | 1.2099E5        | 2        | 2                   | 241   | 254 |                                        |                                                                                     | PEAKS DB  |
| K.EGALMLPH(+14.02)FNSK.A                                      | N    | 51.73  | 1356.6860 | 12     | 1.3  | 679.3512  | 2 | 30.49 | 14       | F14:1499 | OB5941 H1 raw.raw | 2.5741E4        | 1        | 1                   | 440   | 451 | Methylation(others)                    | H8:Methylation(others):53.53                                                        | PEAKS PTM |
| K.N(+.98)PQLQ(+.98)DLDMMLTC(+57.02)VEIKEGALM(+15.99)LPHFNSK.A | N    | 51.60  | 3389.6016 | 29     | 9.0  | 848.4153  | 4 | 36.92 | 12       | F12:1868 | OB5939 H1 raw.raw | 2.6873E6        | 1        | 1                   | 423   | 451 | Carbamidomethylation                   | N1:Deamidation (NQ):0.00;Q5:De                                                      | PEAKS DB  |
| total 217 peptides                                            |      |        |           |        |      |           |   |       |          |          |                   |                 |          |                     |       |     |                                        |                                                                                     |           |

| Peptide                                                       | Uniq | -10lgP | Mass      | Length | ppm  | m/z       | z | RT    | Fraction | Scan     | Source File       | Area Raw in gel | #Feature | #Feature Raw in gel | Start | End | PTM                                 | AScore                                                                                                      | Found By  |
|---------------------------------------------------------------|------|--------|-----------|--------|------|-----------|---|-------|----------|----------|-------------------|-----------------|----------|---------------------|-------|-----|-------------------------------------|-------------------------------------------------------------------------------------------------------------|-----------|
|                                                               |      |        |           |        |      |           |   |       |          |          |                   |                 |          |                     |       |     |                                     | amidation (NQ):14.04;C13:Carbamidomethylation:1000.00;M22:Oxidation (M):18.84                               |           |
| K.LFEVKPDKK.N                                                 | N    | 50.85  | 1102.6385 | 9      | 1.1  | 552.3271  | 2 | 24.94 | 14       | F14:1179 | OB5941 H1 raw.raw | 2.3081E5        | 2        | 2                   | 414   | 422 |                                     |                                                                                                             | PEAKS DB  |
| R.RVLLEENAGGEQEERGQR.R                                        | N    | 50.67  | 2069.0249 | 18     | 2.1  | 690.6837  | 3 | 24.88 | 13       | F13:1165 | OB5940 H1 raw.raw | 2.7227E5        | 1        | 1                   | 334   | 351 |                                     |                                                                                                             | PEAKS DB  |
| K.N(+.98)PQLQDLDMMLTC(+57.02)VEIKEGALM(+15.99)LPHFNSK.A       | N    | 50.17  | 3388.6174 | 29     | -2.4 | 1130.5437 | 3 | 36.35 | 13       | F13:1874 | OB5940 H1 raw.raw | 8.9006E5        | 1        | 1                   | 423   | 451 | Carbamidomethylation; Oxidation (M) | N1:Deamidation (NQ):0.00;C13:Carbamidomethylation:1000.00;M22:Oxidation (M):54.40                           | PEAKS DB  |
| K.NPQLQDLDMM(+15.99)LTC(+57.02)VEIKEGALM(+15.99)LPHFNSK.A     | N    | 48.97  | 3403.6284 | 29     | 2.7  | 1135.5531 | 3 | 35.09 | 14       | F14:1786 | OB5941 H1 raw.raw | 3.2001E5        | 1        | 1                   | 423   | 451 | Carbamidomethylation                | M10:Oxidation (M):12.28;C13:Carbamidomethylation:1000.00;M22:Oxidation (M):28.29                            | PEAKS DB  |
| K.KN(+.98)PQLQDLDMMLTC(+57.02)VEIKEGALMLPHFNSK.A              | N    | 48.84  | 3500.7175 | 30     | 7.1  | 876.1929  | 4 | 36.26 | 13       | F13:1847 | OB5940 H1 raw.raw | 2.2113E6        | 1        | 1                   | 422   | 451 | Carbamidomethylation                | N2:Deamidation (NQ):0.00;C14:Carbamidomethylation:1000.00                                                   | PEAKS DB  |
| R.IFLAGDKDNVDQIEK(+57.02)QAK.D                                | N    | 48.82  | 2201.1692 | 19     | 2.7  | 734.7323  | 3 | 32.55 | 12       | F12:1581 | OB5939 H1 raw.raw | 3.2958E6        | 1        | 1                   | 541   | 559 |                                     | K16:Carbamidomethylation (DHKE, X@N-term):15.91                                                             | PEAKS PTM |
| R.EREEDWRQPR.E                                                | N    | 48.49  | 1399.6592 | 10     | 0.1  | 467.5604  | 3 | 24.77 | 14       | F14:1154 | OB5941 H1 raw.raw | 2.5247E4        | 1        | 1                   | 124   | 133 |                                     |                                                                                                             | PEAKS DB  |
| R.KSFN(+.98)LDEGHALRIPSGFISYILNR.H                            | N    | 47.51  | 2747.4395 | 24     | 4.5  | 687.8702  | 4 | 36.15 | 14       | F14:1837 | OB5941 H1 raw.raw | 1.0524E6        | 1        | 1                   | 254   | 277 |                                     | N4:Deamidation (NQ):23.98                                                                                   | PEAKS DB  |
| K.LFEVKPDKKN(+.98)PQLQDLDMMLTC(+57.02)VEIK.E                  | N    | 47.32  | 3132.5908 | 26     | 9.3  | 1567.3173 | 2 | 34.35 | 14       | F14:1745 | OB5941 H1 raw.raw | 1.9315E5        | 1        | 1                   | 414   | 439 | Carbamidomethylation                | N10:Deamidation (NQ):14.04;C22:Carbamidomethylation:1000.00                                                 | PEAKS DB  |
| K.N(+.98)PQ(+.98)LQDLDMMLTC(+57.02)VEIKEGALM(+15.99)LPHFNSK.A | N    | 46.82  | 3389.6016 | 29     | 9.0  | 848.4153  | 4 | 36.92 | 12       | F12:1851 | OB5939 H1 raw.raw | 7.3613E6        | 2        | 2                   | 423   | 451 | Carbamidomethylation                | N1:Deamidation (NQ):11.12;Q3:Deamidation (NQ):0.00;C13:Carbamidomethylation:1000.00;M22:Oxidation (M):24.93 | PEAKS DB  |
| N.PQLQDLDMMLTC(+57.02)VEIKEGALMLPHFNSK.A                      | N    | 46.63  | 3257.5957 | 28     | 0.9  | 815.4069  | 4 | 37.83 | 14       | F14:1952 | OB5941 H1 raw.raw | 2.3692E5        | 1        | 1                   | 424   | 451 | Carbamidomethylation                | C12:Carbamidomethylation:1000.00                                                                            | PEAKS DB  |
| R.S(+57.02)SENNEGVIVK.V                                       | Y    | 46.57  | 1231.6044 | 11     | -0.2 | 616.8093  | 2 | 23.54 | 14       | F14:1091 | OB5941 H1 raw.raw | 1.0427E3        | 1        | 1                   | 357   | 367 |                                     | S1:Carbamidomethylation (DHKE, X@N-term):20.41                                                              | PEAKS PTM |
| total 217 peptides                                            |      |        |           |        |      |           |   |       |          |          |                   |                 |          |                     |       |     |                                     |                                                                                                             |           |

| Peptide                                          | Uniq | -10lgP | Mass      | Length | ppm  | m/z       | z | RT    | Fraction | Scan     | Source File        | Area Raw in gel | #Feature | #Feature Raw in gel | Start | End | PTM                                 | AScore                                                      | Found By  |
|--------------------------------------------------|------|--------|-----------|--------|------|-----------|---|-------|----------|----------|--------------------|-----------------|----------|---------------------|-------|-----|-------------------------------------|-------------------------------------------------------------|-----------|
| K.Q(-17.03)AKDLAFPGSGEQVEK.L                     | N    | 46.49  | 1685.8260 | 16     | 0.9  | 843.9211  | 2 | 29.97 | 12       | F12:1427 | OB5939 H1 raw.raw  | 0               | 0        | 0                   | 557   | 572 | Pyro-glu from Q                     | Q1:Pyro-glu from Q:1000.00                                  | PEAKS PTM |
| K.SFN(+.98)LDEGHALRIPSGFISYILNRHDNQNL.R.V        | N    | 46.45  | 3496.7600 | 30     | -3.9 | 700.3566  | 5 | 36.38 | 12       | F12:1849 | OB5939 H1 raw.raw  | 6.986E5         | 1        | 1                   | 255   | 284 |                                     | N3:Deamidation (NQ):20.27                                   | PEAKS DB  |
| Q.IEAKPNTLVLPK.H                                 | N    | 46.43  | 1321.7969 | 12     | -4.5 | 661.9028  | 2 | 29.65 | 13       | F13:1449 | OB5940 H1 raw.raw  | 6.8969E5        | 2        | 2                   | 217   | 228 |                                     |                                                             | PEAKS DB  |
| T.PGQFEDFFPASSR.D                                | N    | 45.25  | 1483.6731 | 13     | -1.3 | 742.8429  | 2 | 40.34 | 13       | F13:2103 | OB5940 H1 raw.raw  | 4.0298E3        | 1        | 1                   | 295   | 307 |                                     |                                                             | PEAKS DB  |
| R.IPSGFISYILN(+.98)RHDNQNL.R.V                   | N    | 45.21  | 2257.1604 | 19     | 9.9  | 753.4015  | 3 | 37.61 | 2        | F2:1698  | OB5925 H3B raw.raw | 2.0603E6        | 2        | 2                   | 266   | 284 |                                     | N11:Deamidation (NQ):33.06                                  | PEAKS DB  |
| N.NPFYFPSRR.F                                    | N    | 45.02  | 1182.5934 | 9      | 1.6  | 395.2057  | 3 | 28.08 | 13       | F13:1358 | OB5940 H1 raw.raw  | 2.9991E4        | 1        | 1                   | 173   | 181 |                                     |                                                             | PEAKS DB  |
| R.DQS(-18.01)SYLQGF.SR.N                         | N    | 44.90  | 1268.5785 | 11     | 7.0  | 635.3010  | 2 | 30.87 | 12       | F12:1484 | OB5939 H1 raw.raw  | 0               | 0        | 0                   | 308   | 318 |                                     | S3:Dehydration:33.98                                        | PEAKS PTM |
| K.GTGNLELVAVRKEQQQR.G                            | N    | 44.58  | 1925.0442 | 17     | 0.6  | 642.6890  | 3 | 25.89 | 14       | F14:1220 | OB5941 H1 raw.raw  | 1.1112E5        | 2        | 2                   | 461   | 477 |                                     |                                                             | PEAKS DB  |
| R.EDWRRPSHQQR.K                                  | N    | 43.98  | 1590.7764 | 12     | -0.3 | 398.7012  | 4 | 24.94 | 14       | F14:1169 | OB5941 H1 raw.raw  | 1.0819E4        | 1        | 1                   | 134   | 145 |                                     |                                                             | PEAKS DB  |
| R.VLLE(+21.98)ENAGGEQEER.G                       | N    | 42.61  | 1593.7246 | 14     | -0.7 | 797.8690  | 2 | 26.03 | 13       | F13:1239 | OB5940 H1 raw.raw  | 1.373E5         | 3        | 3                   | 335   | 348 |                                     | E4:Sodium adduct:40.00                                      | PEAKS PTM |
| K.HADADNILVIQ(+.98)QGQATVTVANGNNRK.S             | N    | 42.22  | 2747.3950 | 26     | 5.9  | 916.8110  | 3 | 45.04 | 14       | F14:2357 | OB5941 H1 raw.raw  | 0               | 0        | 0                   | 229   | 254 |                                     | Q11:Deamidation (NQ):9.34                                   | PEAKS DB  |
| K.HADADNILVIQQGQAT(-18.01)VTVAN(+.98)GNNRK.S     | N    | 41.92  | 2729.3845 | 26     | 0.3  | 683.3536  | 4 | 28.96 | 13       | F13:1411 | OB5940 H1 raw.raw  | 3.5545E5        | 1        | 1                   | 229   | 254 |                                     | T16:Dehydration:8.22; N21:Deamidation (NQ):6.08             | PEAKS PTM |
| K.HADADN(+.98)ILVIQQGQATVTVANGNNRK.S             | N    | 41.76  | 2747.3950 | 26     | 3.7  | 916.8090  | 3 | 50.62 | 12       | F12:2616 | OB5939 H1 raw.raw  | 1.1355E5        | 2        | 2                   | 229   | 254 |                                     | N6:Deamidation (NQ):42.57                                   | PEAKS DB  |
| K.ISMPVN(+.98)TPGQFEDFFPASSR.D                   | N    | 41.75  | 2227.0254 | 20     | 9.3  | 1114.5303 | 2 | 58.23 | 14       | F14:3138 | OB5941 H1 raw.raw  | 2.4983E4        | 1        | 1                   | 288   | 307 |                                     | N6:Deamidation (NQ):42.89                                   | PEAKS DB  |
| M.LPHFNSK.A                                      | N    | 41.73  | 841.4446  | 7      | -3.4 | 421.7281  | 2 | 30.24 | 14       | F14:1484 | OB5941 H1 raw.raw  | 1.8069E6        | 2        | 2                   | 445   | 451 |                                     |                                                             | PEAKS DB  |
| K.PNTLVLPK.H                                     | N    | 41.66  | 880.5382  | 8      | 0.4  | 441.2766  | 2 | 27.53 | 13       | F13:1313 | OB5940 H1 raw.raw  | 8.5249E4        | 1        | 1                   | 221   | 228 |                                     |                                                             | PEAKS DB  |
| N.TLEAAFNAEFNEIRR.V                              | N    | 41.51  | 1779.8904 | 15     | -3.0 | 890.9498  | 2 | 32.91 | 14       | F14:1655 | OB5941 H1 raw.raw  | 4.1608E5        | 1        | 1                   | 320   | 334 |                                     |                                                             | PEAKS DB  |
| K.KNPQLQ(+.98)DLDMMLTC(+57.02)VEIKEGALMLPHFNSK.A | N    | 40.89  | 3500.7175 | 30     | 0.4  | 1167.9136 | 3 | 36.34 | 13       | F13:1850 | OB5940 H1 raw.raw  | 4.7608E5        | 1        | 1                   | 422   | 451 | Carbamidomethylation                | Q6:Deamidation (NQ):14.04; C14:Carbamidomethylation:1000.00 | PEAKS DB  |
| R.NTLEAAFN(+.98)AEFNEIRR.V                       | N    | 40.23  | 1894.9172 | 16     | -0.3 | 948.4656  | 2 | 32.92 | 12       | F12:1570 | OB5939 H1 raw.raw  | 1.5322E6        | 1        | 1                   | 319   | 334 |                                     | N8:Deamidation (NQ):8.26                                    | PEAKS DB  |
| R.EGEQEWGT(-18.01)PGSHVR.E                       | N    | 39.67  | 1549.6909 | 14     | -1.7 | 775.8514  | 2 | 27.60 | 14       | F14:1325 | OB5941 H1 raw.raw  | 5.8338E4        | 1        | 1                   | 153   | 166 |                                     | T8:Dehydration:47.09                                        | PEAKS PTM |
| K.NPQLQLDLM(+15.99)M(+15.99)LTC(+57.02)VEIK.E    | N    | 39.57  | 2078.9688 | 17     | 1.1  | 1040.4928 | 2 | 33.80 | 14       | F14:1701 | OB5941 H1 raw.raw  | 0               | 0        | 0                   | 423   | 439 | Oxidation (M); Carbamidomethylation | M9:Oxidation (M):100.00; M10:Oxidation (M):1000.0           | PEAKS DB  |
| total 217 peptides                               |      |        |           |        |      |           |   |       |          |          |                    |                 |          |                     |       |     |                                     |                                                             |           |

| Peptide                                         | Uniq | -10lgP | Mass      | Length | ppm  | m/z       | z | RT    | Fraction | Scan     | Source File        | Area Raw in gel | #Feature | #Feature Raw in gel | Start | End | PTM                                           | AScore                                                                  | Found By  |
|-------------------------------------------------|------|--------|-----------|--------|------|-----------|---|-------|----------|----------|--------------------|-----------------|----------|---------------------|-------|-----|-----------------------------------------------|-------------------------------------------------------------------------|-----------|
|                                                 |      |        |           |        |      |           |   |       |          |          |                    |                 |          |                     |       |     |                                               | 0;C13:Carbamidomethylation:100.0.00                                     |           |
| R.IPS(+59.02)GFISYILNR.H                        | N    | 39.40  | 1437.7802 | 12     | 1.5  | 719.8984  | 2 | 36.96 | 12       | F12:1870 | OB5939 H1 raw.raw  | 4.3694E5        | 1        | 1                   | 266   | 277 |                                               | S3:Aminoethylcysteine:49.79                                             | PEAKS PTM |
| K.HADADNILVIQQ(-18.01).G                        | N    | 38.68  | 1317.6677 | 12     | -4.9 | 659.8379  | 2 | 29.56 | 14       | F14:1421 | OB5941 H1 raw.raw  | 1.6968E5        | 2        | 2                   | 229   | 240 | Dehydration                                   | Q12:Dehydration:76.18                                                   | PEAKS PTM |
| R.IVQ(+.98)IEAKPNTLVLPK.H                       | N    | 38.03  | 1662.9919 | 15     | 6.7  | 832.5088  | 2 | 31.45 | 13       | F13:1578 | OB5940 H1 raw.raw  | 2.7795E5        | 1        | 1                   | 214   | 228 |                                               | Q3:Deamidation (NQ):13.11                                               | PEAKS DB  |
| K.AMVIVVVK(-1.03)GTGNLELVAVR.K                  | N    | 37.92  | 2080.1714 | 20     | 4.3  | 1041.0974 | 2 | 33.79 | 13       | F13:1738 | OB5940 H1 raw.raw  | 2.1453E7        | 1        | 1                   | 452   | 471 | Lysine oxidation to amino adipic semialdehyde | K9:Lysine oxidation to amino adipic semialdehyde:1000.00                | PEAKS PTM |
| I.PSGFISYILNRHDNQNL.R.V                         | N    | 37.07  | 2143.0923 | 18     | 4.0  | 715.3742  | 3 | 33.53 | 12       | F12:1645 | OB5939 H1 raw.raw  | 0               | 0        | 0                   | 267   | 284 |                                               |                                                                         | PEAKS DB  |
| K.EGALM(-48.00)LPHFNSK.A                        | N    | 36.97  | 1294.6670 | 12     | 2.0  | 432.5638  | 3 | 28.31 | 14       | F14:1348 | OB5941 H1 raw.raw  | 1.3683E6        | 1        | 1                   | 440   | 451 | Dethiomethyl                                  | M5:Dethiomethyl:100.0.00                                                | PEAKS PTM |
| R.IVQIEAKPN(+15.99)TLVLPK.H                     | N    | 36.93  | 1678.0028 | 15     | -2.8 | 840.0063  | 2 | 29.56 | 14       | F14:1444 | OB5941 H1 raw.raw  | 5.568E5         | 1        | 1                   | 214   | 228 |                                               | N9:Oxidation or Hydroxylation:0.00                                      | PEAKS PTM |
| K.KGSEEEGDITNPINLREGEPLDLSNN(+.98)FGK.L         | Y    | 36.62  | 3059.4319 | 28     | 7.6  | 765.8711  | 4 | 31.46 | 8        | F8:1493  | OB5935 H3B raw.raw | 3.4976E4        | 1        | 1                   | 386   | 413 |                                               | N25:Deamidation (NQ):0.00                                               | PEAKS DB  |
| R.IFLAGDKDNVIDQ(+.98)IEK.Q                      | N    | 36.27  | 1817.9410 | 16     | 7.9  | 606.9924  | 3 | 63.32 | 14       | F14:3434 | OB5941 H1 raw.raw  | 1.3413E4        | 1        | 1                   | 541   | 556 |                                               | Q13:Deamidation (NQ):25.70                                              | PEAKS DB  |
| K.HAD(+57.02)ADNILVIQQGQATVTVANGN(+.98)NRK.S    | N    | 35.92  | 2804.4165 | 26     | -3.8 | 702.1088  | 4 | 28.95 | 13       | F13:1413 | OB5940 H1 raw.raw  | 2.7833E5        | 1        | 1                   | 229   | 254 |                                               | D3:Carbamidomethylation (DHKE, X@N-term):4.64;N23:Deamidation (NQ):0.00 | PEAKS PTM |
| K.NPQ(+.98)LQDLDMMLTC(+57.02)VEIKEGALMLPHFNSK.A | N    | 35.84  | 3372.6226 | 29     | 9.4  | 1125.2253 | 3 | 40.73 | 12       | F12:2064 | OB5939 H1 raw.raw  | 5.6313E5        | 1        | 1                   | 423   | 451 | Carbamidomethylation                          | Q3:Deamidation (NQ):0.00;C13:Carbamidomethylation:1000.00               | PEAKS DB  |
| K.ISM(+15.99)PVNTPGQ(+.98)FEDFFPASSR.D          | N    | 35.67  | 2243.0205 | 20     | 6.2  | 1122.5245 | 2 | 50.73 | 12       | F12:2643 | OB5939 H1 raw.raw  | 0               | 0        | 0                   | 288   | 307 | Oxidation (M)                                 | M3:Oxidation (M):100.0.00;Q10:Deamidation (NQ):22.37                    | PEAKS DB  |
| K.GT(-18.01)GNLELVAVRK.E                        | N    | 35.64  | 1237.7142 | 12     | 0.9  | 413.5790  | 3 | 26.41 | 13       | F13:1259 | OB5940 H1 raw.raw  | 7.4255E5        | 3        | 3                   | 461   | 472 | Dehydration                                   | T2:Dehydration:1000.00                                                  | PEAKS PTM |
| K.KGSEEEGDIT(-18.01)N(+.98)PINLR.E              | N    | 35.42  | 1753.8483 | 16     | 2.8  | 585.6250  | 3 | 28.08 | 13       | F13:1354 | OB5940 H1 raw.raw  | 2.8958E5        | 1        | 1                   | 386   | 401 |                                               | T10:Dehydration:25.86;N11:Deamidation (NQ):32.46                        | PEAKS PTM |
| K.SFNLDEGHALRIPS.G                              | N    | 35.38  | 1554.7791 | 14     | -4.8 | 778.3931  | 2 | 30.79 | 13       | F13:1515 | OB5940 H1 raw.raw  | 5.2113E3        | 1        | 1                   | 255   | 268 |                                               |                                                                         | PEAKS DB  |
| R.DQ(+.98)SSYLQGFSSR.N                          | N    | 34.61  | 1287.5731 | 11     | -3.2 | 644.7917  | 2 | 63.83 | 14       | F14:3449 | OB5941 H1 raw.raw  | 0               | 0        | 0                   | 308   | 318 |                                               | Q2:Deamidation (NQ):41.87                                               | PEAKS DB  |
| R.NN(-17.03)PFYFSSRR.F                          | N    | 34.10  | 1279.6097 | 10     | -0.4 | 427.5437  | 3 | 28.25 | 13       | F13:1369 | OB5940 H1 raw.raw  | 1.47E5          | 1        | 1                   | 172   | 181 |                                               | N2:Ammonia-loss (N):12.28                                               | PEAKS PTM |
| total 217 peptides                              |      |        |           |        |      |           |   |       |          |          |                    |                 |          |                     |       |     |                                               |                                                                         |           |

| Peptide                                                              | Uniq | -10lgP | Mass      | Length | ppm  | m/z       | z | RT    | Fraction | Scan     | Source File        | Area Raw in gel | #Feature | #Feature Raw in gel | Start | End | PTM                                    | AScore                                                                                                                                   | Found By  |
|----------------------------------------------------------------------|------|--------|-----------|--------|------|-----------|---|-------|----------|----------|--------------------|-----------------|----------|---------------------|-------|-----|----------------------------------------|------------------------------------------------------------------------------------------------------------------------------------------|-----------|
| G.SEEEGDITNPINLREGEPDLSNNFGK.L                                       | Y    | 33.63  | 2873.3315 | 26     | 2.9  | 958.7872  | 3 | 32.34 | 7        | F7:1553  | OB5934 H3B raw.raw | 5.5034E4        | 1        | 1                   | 388   | 413 |                                        |                                                                                                                                          | PEAKS DB  |
| T.G(+214.97)NLELVAVRK.E                                              | N    | 33.47  | 1312.6267 | 10     | 2.3  | 657.3221  | 2 | 27.95 | 14       | F14:1280 | OB5941 H1 raw.raw  | 2.4669E5        | 1        | 1                   | 463   | 472 | 4-sulfophenyl isothiocyanate           | G1:4-sulfophenyl isothiocyanate:144.45                                                                                                   | PEAKS PTM |
| R.GRREEEEDEDEEEEGSNR.E                                               | Y    | 33.44  | 2192.8689 | 18     | 0.0  | 731.9636  | 3 | 23.70 | 13       | F13:1082 | OB5940 H1 raw.raw  | 3.4989E3        | 1        | 1                   | 478   | 495 |                                        |                                                                                                                                          | PEAKS DB  |
| K.HADADNILVIQQ(+.98)GQATVTVANGNN(+.98)RK.S                           | N    | 33.28  | 2748.3792 | 26     | 7.6  | 917.1406  | 3 | 48.20 | 12       | F12:2471 | OB5939 H1 raw.raw  | 2.0672E4        | 1        | 1                   | 229   | 254 |                                        | Q12:Deamidation (N Q):23.10;N24:Deamidation (NQ):0.00                                                                                    | PEAKS DB  |
| K.HADAD(-18.01)NILVIQQGQATVTVANGNNRK.S                               | N    | 33.25  | 2728.4004 | 26     | 3.5  | 910.4772  | 3 | 28.70 | 13       | F13:1390 | OB5940 H1 raw.raw  | 0               | 0        | 0                   | 229   | 254 |                                        | D5:Dehydration:30.36                                                                                                                     | PEAKS PTM |
| K.ISM(+15.99)PVN(+.98)TPGQFEDFFPASSR.D                               | N    | 33.05  | 2243.0205 | 20     | 7.6  | 1122.5260 | 2 | 49.72 | 13       | F13:2625 | OB5940 H1 raw.raw  | 0               | 0        | 0                   | 288   | 307 | Oxidation (M)                          | M3:Oxidation (M):100.0.00;N6:Deamidation (NQ):25.70                                                                                      | PEAKS DB  |
| R.IFLAGDK(+26.02)DNVIDQIEK.Q                                         | N    | 32.97  | 1842.9727 | 16     | -0.2 | 922.4934  | 2 | 35.63 | 14       | F14:1844 | OB5941 H1 raw.raw  | 1.4466E5        | 1        | 1                   | 541   | 556 | Acetaldehyde +26                       | K7:Acetaldehyde +26:74.34                                                                                                                | PEAKS PTM |
| K.NPQLQ(+.98)DLDDMM(+15.99)LTC(+57.02)VEIK.E                         | N    | 32.85  | 2063.9578 | 17     | -3.4 | 1032.9827 | 2 | 37.19 | 12       | F12:1881 | OB5939 H1 raw.raw  | 2.2954E4        | 1        | 1                   | 423   | 439 | Carbamidomethylation                   | Q5:Deamidation (NQ):26.31;M10:Oxidation (M):0.00;C13:Carbamidomethylation:1000.00                                                        | PEAKS DB  |
| K.HADADNILVIQ(+.98)QGQ(+.98)ATVTVANGNNRK.S                           | N    | 32.62  | 2748.3792 | 26     | 3.1  | 917.1365  | 3 | 57.24 | 13       | F13:3064 | OB5940 H1 raw.raw  | 0               | 0        | 0                   | 229   | 254 |                                        | Q11:Deamidation (N Q):0.00;Q14:Deamidation (NQ):0.00                                                                                     | PEAKS DB  |
| K.N(+.98)PQ(+.98)LQ(+.98)DLDDMM(+15.99)LTC(+57.02)VEIKEGALMLPHFNSK.A | N    | 32.23  | 3390.5854 | 29     | 3.7  | 848.6568  | 4 | 38.47 | 14       | F14:1982 | OB5941 H1 raw.raw  | 0               | 0        | 0                   | 423   | 451 | Deamidation (NQ); Carbamidomethylation | N1:Deamidation (NQ):62.42;Q3:Deamidation (NQ):65.92;Q5:Deamidation (N Q):60.92;M10:Oxidation (M):12.28;C13:Carbamidomethylation:100.0.00 | PEAKS DB  |
| K.KN(+.98)PQ(+.98)LQ(+.98)DLDM(+15.99)MLTC(+57.02)VEIKEGALMLPHFNSK.A | N    | 31.81  | 3518.6804 | 30     | -3.0 | 880.6747  | 4 | 37.45 | 12       | F12:1882 | OB5939 H1 raw.raw  | 0               | 0        | 0                   | 422   | 451 | Deamidation (NQ); Carbamidomethylation | N2:Deamidation (NQ):58.75;Q4:Deamidation (NQ):61.65;Q6:Deamidation (N Q):53.75;M10:Oxidation (M):0.00;C14:Carbamidomethylation:1000.00   | PEAKS DB  |
| total 217 peptides                                                   |      |        |           |        |      |           |   |       |          |          |                    |                 |          |                     |       |     |                                        |                                                                                                                                          |           |

sp|P43238|ALL12\_ARAHY

[back to list](#)[Protein Coverage](#) | [Supporting Peptides](#) |

## Protein Coverage:

1 MRGRVSPMLL LLGILVLASV SATHAKSSPY QKKTENPCAQ RCLQSCQQEP DDLKQKACES RCTKLEYDPR CVIDPRGHTG  
81 TTNQRSPPE RTRGRQPGDY DDDRQPRRE EGGRWGPAGP REREEREEDWR QPREDWRRPS HQQPRKIRPE GREGEQEWGT

161 PGSHVREETS RNNPFYFPSR RFSTRYGNQN GRIRVLQRFD QRSRQFQNLQ NHRIVQIEAK PNTLVLPKHA DADNILVIQQ

241 GQATVTVANG NNRKSFNLDE GHALRIPSGF ISYILNRHDN QNLRVAKISM PVNTPGQFED FFPASSRDQS SYLQGFSRNT

321 LEAAFNAEFN EIRRVILLEEN AGGEQEERGQ RRWSTRSSSEN NEGIVVKVSK EHVEELTKHA KSVSKKGSEE EGDITNPINL

401 REGEPLDLSNN FGKLFVVKPD KKNPQLQDLD MMLTCVEIKE GALMLPHFNS KAMVIVVVNK GTGNLELVAV RKEQQQGRRR

481 EEEEEDEEEE EGSNREVVRY TARLKEGDVF IMPAAHPVAI NASSELHLLG FGINAENNHR IFLAGDKDNV IDQIEKQAKD

561 LAFPGSGEQV EKLIKNNQKES HFVSARPQSQ SQSPSSPEKE SPEKEDQEEE NQGGKGPLLS ILKAFN

Ammonia-loss (N) (-17.03)  
Acetaldehyde +26 (+26.02)  
Carbamidomethylation (+57.02)  
Carbamidomethylation (DHKE, X@N-term) (+57.02)  
Deamidation (NQ) (+0.98)  
Dethiomethyl (-48.00)  
Dehydration (-18.01)  
Formylation (+27.99)  
Iodination (+125.90)  
Lysine oxidation to amino adipic semialdehyde (-1.03)  
Methylation(KR) (+14.02)  
Methylation(others) (+14.02)  
Oxidation (M) (+15.99)  
Pyro-glu from E (-18.01)  
Pyro-glu from Q (-17.03)  
4-sulfophenyl isothiocyanate (+214.97)

## Supporting Peptides:

| Peptide                                   | Uniq | -10lgP | Mass      | Length | ppm  | m/z       | z | RT    | Fraction | Scan     | Source File        | Area Raw in gel | #Feature | #Feature Raw in gel | Start | End | PTM                  | AScore                                                  | Found By |
|-------------------------------------------|------|--------|-----------|--------|------|-----------|---|-------|----------|----------|--------------------|-----------------|----------|---------------------|-------|-----|----------------------|---------------------------------------------------------|----------|
| K.HADADNILVIQQGQATVTVAN(+.98)GNNRK.S      | N    | 140.09 | 2747.3950 | 26     | -1.1 | 916.8046  | 3 | 29.38 | 14       | F14:1509 | OB5941 H1 raw.raw  | 3.7837E8        | 20       | 20                  | 229   | 254 |                      | N21:Deamidation (N Q):26.31                             | PEAKS DB |
| K.KNPQLQDLDMMLTC(+57.02)VEIK.E            | N    | 137.14 | 2175.0737 | 18     | 2.4  | 1088.5468 | 2 | 34.90 | 14       | F14:1774 | OB5941 H1 raw.raw  | 4.1086E6        | 3        | 3                   | 422   | 439 | Carbamidomethylation | C14:Carbamidomethylation:1000.00                        | PEAKS DB |
| K.HADADNILVIQQGQATVTVANGNNR.K             | N    | 135.84 | 2618.3162 | 25     | 2.9  | 1310.1692 | 2 | 30.42 | 14       | F14:1494 | OB5941 H1 raw.raw  | 5.8142E6        | 3        | 3                   | 229   | 253 |                      |                                                         | PEAKS DB |
| K.ISMPVNTPGQFEDFFPASSR.D                  | N    | 135.58 | 2226.0415 | 20     | 1.9  | 1114.0302 | 2 | 35.63 | 14       | F14:1807 | OB5941 H1 raw.raw  | 2.1661E8        | 32       | 26                  | 288   | 307 |                      |                                                         | PEAKS DB |
| K.ISM(+15.99)PVNTPGQFEDFFPASSR.D          | N    | 134.77 | 2242.0364 | 20     | 2.3  | 1122.0281 | 2 | 34.42 | 2        | F2:1522  | OB5925 H3B raw.raw | 1.6845E7        | 19       | 17                  | 288   | 307 | Oxidation (M)        | M3:Oxidation (M):1000.00                                | PEAKS DB |
| K.NPQLQDLDMMLTC(+57.02)VEIK.E             | N    | 131.65 | 2046.9788 | 17     | -0.8 | 1024.4958 | 2 | 36.89 | 14       | F14:1903 | OB5941 H1 raw.raw  | 1.2559E7        | 8        | 8                   | 423   | 439 | Carbamidomethylation | C13:Carbamidomethylation:1000.00                        | PEAKS DB |
| K.NPQLQDLDM(+15.99)MLTC(+57.02)VEIK.E     | N    | 128.59 | 2062.9736 | 17     | -6.6 | 1032.4873 | 2 | 36.34 | 14       | F14:1860 | OB5941 H1 raw.raw  | 2.4371E5        | 2        | 2                   | 423   | 439 | Carbamidomethylation | M9:Oxidation (M):30.46;C13:Carbamidomethylation:1000.00 | PEAKS DB |
| K.KGSEEEGDITNPINLREGEPLSNNFGK.L           | Y    | 126.17 | 3058.4478 | 28     | -3.6 | 1020.4862 | 3 | 31.46 | 14       | F14:1557 | OB5941 H1 raw.raw  | 5.2061E7        | 16       | 16                  | 386   | 413 |                      |                                                         | PEAKS DB |
| R.NTLEAAFAEFNEIR.R                        | N    | 126.11 | 1737.8322 | 15     | 3.3  | 869.9262  | 2 | 35.27 | 14       | F14:1792 | OB5941 H1 raw.raw  | 1.3691E7        | 6        | 6                   | 319   | 333 |                      |                                                         | PEAKS DB |
| K.HADADNILVIQQGQATVTVANGNNRK.S            | N    | 120.98 | 2746.4111 | 26     | 4.7  | 1374.2192 | 2 | 29.02 | 14       | F14:1406 | OB5941 H1 raw.raw  | 4.4412E7        | 13       | 13                  | 229   | 254 |                      |                                                         | PEAKS DB |
| K.KGSEEEGDITNPINLR.E                      | N    | 117.96 | 1770.8748 | 16     | -0.9 | 886.4438  | 2 | 28.67 | 14       | F14:1384 | OB5941 H1 raw.raw  | 2.1993E7        | 17       | 17                  | 386   | 401 |                      |                                                         | PEAKS DB |
| K.SFNLDEGHALRIPSGFISYILNR.H               | N    | 117.92 | 2618.3604 | 23     | 0.6  | 1310.1882 | 2 | 36.89 | 14       | F14:1902 | OB5941 H1 raw.raw  | 2.1092E8        | 40       | 39                  | 255   | 277 |                      |                                                         | PEAKS DB |
| R.VLLEENAGGEQEER.G                        | N    | 114.70 | 1571.7427 | 14     | 1.1  | 786.8795  | 2 | 26.65 | 14       | F14:1250 | OB5941 H1 raw.raw  | 1.2337E7        | 7        | 7                   | 335   | 348 |                      |                                                         | PEAKS DB |
| K.GSEEEGDITNPINLR.E                       | N    | 114.17 | 1642.7798 | 15     | 1.7  | 822.3986  | 2 | 30.60 | 14       | F14:1507 | OB5941 H1 raw.raw  | 8.7873E6        | 4        | 4                   | 387   | 401 |                      |                                                         | PEAKS DB |
| R.IFLAGDKDNVDIQIEKQAK.D                   | N    | 113.07 | 2144.1477 | 19     | 1.1  | 715.7240  | 3 | 32.93 | 7        | F7:1578  | OB5934 H3B raw.raw | 5.566E7         | 12       | 12                  | 541   | 559 |                      |                                                         | PEAKS DB |
| K.AMVVVVNKGTGNLELVAVR.K                   | N    | 112.17 | 2081.2031 | 20     | 1.5  | 694.7427  | 3 | 34.35 | 14       | F14:1739 | OB5941 H1 raw.raw  | 7.0931E7        | 12       | 12                  | 452   | 471 |                      |                                                         | PEAKS DB |
| R.KSFNLDEGHALR.I                          | N    | 112.03 | 1385.7051 | 12     | 1.1  | 693.8606  | 2 | 25.70 | 14       | F14:1202 | OB5941 H1 raw.raw  | 3.2948E6        | 6        | 6                   | 254   | 265 |                      |                                                         | PEAKS DB |
| R.IPSGFISYILNR.H                          | N    | 111.89 | 1378.7609 | 12     | 1.5  | 690.3887  | 2 | 43.03 | 14       | F14:2242 | OB5941 H1 raw.raw  | 2.1426E8        | 15       | 15                  | 266   | 277 |                      |                                                         | PEAKS DB |
| R.DQSSYLQGFSR.N                           | N    | 110.94 | 1286.5891 | 11     | -1.4 | 644.3009  | 2 | 30.60 | 14       | F14:1505 | OB5941 H1 raw.raw  | 6.2405E7        | 21       | 21                  | 308   | 318 |                      |                                                         | PEAKS DB |
| K.NPQLQDLDMMLTC(+57.02)VEIKEGALMLPHFNSK.A | N    | 110.02 | 3371.6387 | 29     | -0.1 | 1686.8264 | 2 | 37.85 | 14       | F14:1946 | OB5941 H1 raw.raw  | 1.7936E8        | 14       | 14                  | 423   | 451 | Carbamidomethylation | C13:Carbamidomethylation:1000.00                        | PEAKS DB |
| total 217 peptides                        |      |        |           |        |      |           |   |       |          |          |                    |                 |          |                     |       |     |                      |                                                         |          |



| Peptide                                 | Uniq | -10lgP | Mass      | Length | ppm  | m/z       | z | RT    | Fraction | Scan     | Source File       | Area Raw in gel | #Feature | #Feature Raw in gel | Start | End | PTM                                   | AScore                                              | Found By  |
|-----------------------------------------|------|--------|-----------|--------|------|-----------|---|-------|----------|----------|-------------------|-----------------|----------|---------------------|-------|-----|---------------------------------------|-----------------------------------------------------|-----------|
| K.AMVIVVVKGTGNLELVAVRK.E                | N    | 109.98 | 2209.2981 | 21     | -1.4 | 1105.6548 | 2 | 32.55 | 14       | F14:1615 | OB5941 H1 raw.raw | 2.9136E8        | 18       | 18                  | 452   | 472 |                                       |                                                     | PEAKS DB  |
| K.AM(+15.99)VIVVVKGTGNLELVAVR.K         | N    | 109.59 | 2097.1980 | 20     | -2.2 | 1049.6040 | 2 | 32.73 | 14       | F14:1638 | OB5941 H1 raw.raw | 3.1537E7        | 10       | 10                  | 452   | 471 | Oxidation (M)                         | M2:Oxidation (M):100.0.00                           | PEAKS DB  |
| K.SFNLDEGHALR.I                         | N    | 109.41 | 1257.6101 | 11     | -3.3 | 629.8102  | 2 | 27.77 | 14       | F14:1329 | OB5941 H1 raw.raw | 7.2473E7        | 30       | 30                  | 255   | 265 |                                       |                                                     | PEAKS DB  |
| R.EGEQEWGTPGSHVR.E                      | N    | 108.42 | 1567.7015 | 14     | 0.5  | 784.8585  | 2 | 25.51 | 14       | F14:1193 | OB5941 H1 raw.raw | 5.0052E5        | 6        | 6                   | 153   | 166 |                                       |                                                     | PEAKS DB  |
| R.IFLAGDKDNVIDQIEK.Q                    | N    | 108.13 | 1816.9570 | 16     | 0.2  | 909.4860  | 2 | 33.10 | 14       | F14:1683 | OB5941 H1 raw.raw | 7.2865E8        | 41       | 41                  | 541   | 556 |                                       |                                                     | PEAKS DB  |
| R.KSFNLDEGHALRIPSGFISYILNR.H            | N    | 107.80 | 2746.4553 | 24     | -2.1 | 916.4905  | 3 | 36.16 | 12       | F12:1802 | OB5939 H1 raw.raw | 7.186E6         | 4        | 4                   | 254   | 277 |                                       |                                                     | PEAKS DB  |
| R.I(+57.02)PSGFISYILNR.H                | N    | 104.65 | 1435.7823 | 12     | -1.7 | 718.8972  | 2 | 36.52 | 14       | F14:1869 | OB5941 H1 raw.raw | 1.3017E7        | 3        | 3                   | 266   | 277 | Carbamidomethylation (DHKE, X@N-term) | I1:Carbamidomethylation (DHKE, X@N-term):1000.00    | PEAKS PTM |
| R.VLLEENAGGEQEERGQR.R                   | N    | 104.46 | 1912.9238 | 17     | 1.8  | 957.4709  | 2 | 25.31 | 14       | F14:1182 | OB5941 H1 raw.raw | 1.9161E6        | 8        | 8                   | 335   | 351 |                                       |                                                     | PEAKS DB  |
| R.I(+57.02)FLAGDKDNVIDQIEK.Q            | N    | 103.96 | 1873.9785 | 16     | -5.0 | 937.9919  | 2 | 32.19 | 14       | F14:1619 | OB5941 H1 raw.raw | 4.5184E7        | 7        | 7                   | 541   | 556 | Carbamidomethylation (DHKE, X@N-term) | I1:Carbamidomethylation (DHKE, X@N-term):90.91      | PEAKS PTM |
| R.EGEPDLSNNFGK.L                        | Y    | 103.27 | 1305.5836 | 12     | 0.4  | 653.7994  | 2 | 27.95 | 14       | F14:1330 | OB5941 H1 raw.raw | 7.4849E6        | 3        | 3                   | 402   | 413 |                                       |                                                     | PEAKS DB  |
| K.QAKDLAFPGSGEQVEK.L                    | N    | 102.73 | 1702.8525 | 16     | 1.8  | 852.4351  | 2 | 26.85 | 14       | F14:1278 | OB5941 H1 raw.raw | 1.286E6         | 6        | 6                   | 557   | 572 |                                       |                                                     | PEAKS DB  |
| K.H(+57.02)ADADNILVIQGGQATVTVANGNNRK.S  | N    | 102.10 | 2803.4324 | 26     | -1.3 | 935.4835  | 3 | 29.92 | 14       | F14:1452 | OB5941 H1 raw.raw | 1.6897E6        | 1        | 1                   | 229   | 254 |                                       | H1:Carbamidomethylation (DHKE, X@N-term):39.76      | PEAKS PTM |
| K.DLAFPGSGEQVEK.L                       | N    | 101.44 | 1375.6619 | 13     | -2.0 | 688.8369  | 2 | 30.08 | 14       | F14:1472 | OB5941 H1 raw.raw | 6.5563E7        | 9        | 9                   | 560   | 572 |                                       |                                                     | PEAKS DB  |
| K.GSEEEGDITNPINLREGEPLDLSNFGK.L         | Y    | 101.39 | 2930.3530 | 27     | -3.6 | 1466.1785 | 2 | 31.62 | 13       | F13:1574 | OB5940 H1 raw.raw | 1.3299E7        | 8        | 8                   | 387   | 413 |                                       |                                                     | PEAKS DB  |
| K.NPQLQDLDMMLTCVEIK(+14.02).E           | N    | 101.30 | 2003.9730 | 17     | 2.1  | 1002.9958 | 2 | 38.00 | 14       | F14:1960 | OB5941 H1 raw.raw | 6.7851E5        | 2        | 2                   | 423   | 439 | Methylation(KR)                       | K17:Methylation(KR):1000.00                         | PEAKS PTM |
| K.S(+57.02)FNLDEGHALR.I                 | N    | 100.96 | 1314.6316 | 11     | 0.8  | 658.3236  | 2 | 27.59 | 14       | F14:1340 | OB5941 H1 raw.raw | 5.6012E6        | 7        | 7                   | 255   | 265 | Carbamidomethylation (DHKE, X@N-term) | S1:Carbamidomethylation (DHKE, X@N-term):101.71     | PEAKS PTM |
| R.RVLEENAGGEQEER.G                      | N    | 98.06  | 1727.8438 | 15     | 0.4  | 576.9554  | 3 | 24.77 | 13       | F13:1156 | OB5940 H1 raw.raw | 1.2517E5        | 5        | 5                   | 334   | 348 |                                       |                                                     | PEAKS DB  |
| R.IPSGFISYILNRHDQNQLR.V                 | N    | 97.42  | 2256.1763 | 19     | 0.5  | 565.0516  | 4 | 33.66 | 14       | F14:1693 | OB5941 H1 raw.raw | 3.392E8         | 42       | 42                  | 266   | 284 |                                       |                                                     | PEAKS DB  |
| K.AM(+15.99)VIVVVKGTGNLELVAVRK.E        | N    | 96.33  | 2225.2930 | 21     | -0.4 | 1113.6533 | 2 | 30.76 | 14       | F14:1520 | OB5941 H1 raw.raw | 4.0787E7        | 8        | 7                   | 452   | 472 | Oxidation (M)                         | M2:Oxidation (M):100.0.00                           | PEAKS DB  |
| K.KNPQLQDLDDMM(+15.99)LTC(+57.02)VEIK.E | N    | 95.01  | 2191.0686 | 18     | -3.4 | 1096.5378 | 2 | 32.73 | 14       | F14:1643 | OB5941 H1 raw.raw | 1.9787E5        | 1        | 1                   | 422   | 439 | Carbamidomethylation                  | M11:Oxidation (M):9.34;C14:Carbamidomethylation:100 | PEAKS DB  |
| total 217 peptides                      |      |        |           |        |      |           |   |       |          |          |                   |                 |          |                     |       |     |                                       |                                                     |           |

| Peptide                                           | Uniq | -10lgP | Mass      | Length | ppm  | m/z       | z | RT    | Fraction | Scan     | Source File        | Area Raw in gel | #Feature | #Feature Raw in gel | Start | End | PTM                                                                       | AScore                                                   | Found By  |
|---------------------------------------------------|------|--------|-----------|--------|------|-----------|---|-------|----------|----------|--------------------|-----------------|----------|---------------------|-------|-----|---------------------------------------------------------------------------|----------------------------------------------------------|-----------|
|                                                   |      |        |           |        |      |           |   |       |          |          |                    |                 |          |                     |       |     |                                                                           | 0.00                                                     |           |
| K.NPQLQDLDM(-48.00)LTC(+57.02)VEIK.E              | N    | 93.52  | 1998.9755 | 17     | -2.5 | 1000.4926 | 2 | 32.55 | 14       | F14:1628 | OB5941 H1 raw.raw  | 1.3958E7        | 5        | 5                   | 423   | 439 | Carbamidomethylation                                                      | M10:Dethio methyl:27.96;C13:Carbamidomethylation:1000.00 | PEAKS PTM |
| K.NPQLQDLDM(+15.99)MLTC(+57.02)VEIKEGALMLPHFNSK.A | N    | 92.22  | 3387.6335 | 29     | -1.5 | 1130.2168 | 3 | 36.17 | 14       | F14:1926 | OB5941 H1 raw.raw  | 2.8061E7        | 4        | 4                   | 423   | 451 | Carbamidomethylation                                                      | M9:Oxidation (M):10.11;C13:Carbamidomethylation:1000.00  | PEAKS DB  |
| R.NNPFYFPSRR.F                                    | N    | 92.08  | 1296.6364 | 10     | -3.0 | 649.3235  | 2 | 28.67 | 14       | F14:1408 | OB5941 H1 raw.raw  | 1.2788E8        | 21       | 21                  | 172   | 181 |                                                                           |                                                          | PEAKS DB  |
| K.EGALM(+15.99)LPHFNSK.A                          | N    | 91.98  | 1358.6653 | 12     | 2.1  | 680.3414  | 2 | 29.74 | 14       | F14:1443 | OB5941 H1 raw.raw  | 1.9561E6        | 3        | 3                   | 440   | 451 | Oxidation (M)                                                             | M5:Oxidation (M):1000.00                                 | PEAKS DB  |
| R.VLLEENAGGEQEERGQRR.W                            | N    | 91.09  | 2069.0249 | 18     | 2.1  | 690.6837  | 3 | 25.31 | 14       | F14:1186 | OB5941 H1 raw.raw  | 1.1888E6        | 3        | 3                   | 335   | 352 |                                                                           |                                                          | PEAKS DB  |
| K.KNPQLQDLDM(+15.99)LTC(+57.02)VEIKEGALMLPHFNSK.A | N    | 90.76  | 3515.7285 | 30     | -2.7 | 879.9370  | 4 | 34.52 | 13       | F13:1755 | OB5940 H1 raw.raw  | 2.6989E6        | 3        | 3                   | 422   | 451 | Carbamidomethylation                                                      | M11:Oxidation (M):30.46;C14:Carbamidomethylation:1000.00 | PEAKS DB  |
| K.AM(-48.00)VIVVVNKG TGNLELVAVR.K                 | N    | 90.57  | 2033.1997 | 20     | -3.4 | 1017.6036 | 2 | 31.46 | 14       | F14:1539 | OB5941 H1 raw.raw  | 1.6588E7        | 6        | 6                   | 452   | 471 | Dethiomethyl                                                              | M2:Dethio methyl:1000.00                                 | PEAKS PTM |
| K.A(+57.02)MVIVVVNKG TGNLELVAVR.K                 | N    | 90.54  | 2138.2246 | 20     | -0.9 | 1070.1187 | 2 | 34.35 | 14       | F14:1737 | OB5941 H1 raw.raw  | 5.6414E6        | 3        | 3                   | 452   | 471 | Carbamidomethylation (DHKE, X@N-term)                                     | A1:Carbamidomethylation (DHKE, X@N-term):207.56          | PEAKS PTM |
| K.NPQLQDLDMMLTC(+57.02)VEIKEGALM(+15.99)LPHFNSK.A | N    | 90.37  | 3387.6335 | 29     | -1.5 | 1130.2168 | 3 | 36.17 | 14       | F14:1895 | OB5941 H1 raw.raw  | 3.1109E7        | 7        | 7                   | 423   | 451 | Carbamidomethylation; Oxidation (M)                                       | C13:Carbamidomethylation:1000.00;M22:Oxidation (M):69.89 | PEAKS DB  |
| K.H(+57.02)ADADNILVIQGGQATVTVAN(+.98)GNNRK.S      | N    | 90.07  | 2804.4165 | 26     | -1.3 | 935.8115  | 3 | 30.08 | 14       | F14:1476 | OB5941 H1 raw.raw  | 6.8084E6        | 2        | 2                   | 229   | 254 | H1:Carbamidomethylation (DHKE, X@N-term):45.01;N21:Deamidation (NQ):14.04 |                                                          | PEAKS PTM |
| R.IVQIEAKPNTLVLPK.H                               | N    | 89.51  | 1662.0079 | 15     | -3.4 | 832.0084  | 2 | 29.92 | 14       | F14:1456 | OB5941 H1 raw.raw  | 3.047E8         | 42       | 42                  | 214   | 228 |                                                                           |                                                          | PEAKS DB  |
| F.LAGDKDNVIDQIEK.Q                                | N    | 89.22  | 1556.8046 | 14     | -3.2 | 779.4071  | 2 | 32.19 | 12       | F12:1557 | OB5939 H1 raw.raw  | 4.4864E6        | 2        | 2                   | 543   | 556 |                                                                           |                                                          | PEAKS DB  |
| K.I(+57.02)SMPVNTPGQFEDFFPASSR.D                  | N    | 88.49  | 2283.0630 | 20     | -0.1 | 1142.5387 | 2 | 35.84 | 12       | F12:1793 | OB5939 H1 raw.raw  | 6.4772E5        | 1        | 1                   | 288   | 307 | Carbamidomethylation (DHKE, X@N-term)                                     | I1:Carbamidomethylation (DHKE, X@N-term):156.03          | PEAKS PTM |
| K.DLAFFGSGEQVEKLIK.N                              | N    | 87.96  | 1729.9249 | 16     | 1.0  | 865.9706  | 2 | 33.30 | 7        | F7:1601  | OB5934 H3B raw.raw | 6.2551E5        | 3        | 3                   | 560   | 575 |                                                                           |                                                          | PEAKS DB  |
| K.EGALMLPHFNSK.A                                  | N    | 87.95  | 1342.6703 | 12     | 2.5  | 672.3441  | 2 | 29.83 | 13       | F13:1462 | OB5940 H1 raw.raw  | 9.3502E6        | 3        | 3                   | 440   | 451 |                                                                           |                                                          | PEAKS DB  |
| K.HADADNILVIQGGQATVTVAN(+.98)GNNR.K               | N    | 87.06  | 2619.3000 | 25     | -1.2 | 1310.6558 | 2 | 30.35 | 13       | F13:1535 | OB5940 H1 raw.raw  | 4.8683E6        | 1        | 1                   | 229   | 253 |                                                                           | N21:Deamidation (NQ):7.32                                | PEAKS DB  |
| total 217 peptides                                |      |        |           |        |      |           |   |       |          |          |                    |                 |          |                     |       |     |                                                                           |                                                          |           |

| Peptide                                    | Uniq | -10lgP | Mass      | Length | ppm  | m/z       | z | RT    | Fraction | Scan     | Source File       | Area Raw in gel | #Feature | #Feature Raw in gel | Start | End | PTM                                   | AScore                                                   | Found By  |
|--------------------------------------------|------|--------|-----------|--------|------|-----------|---|-------|----------|----------|-------------------|-----------------|----------|---------------------|-------|-----|---------------------------------------|----------------------------------------------------------|-----------|
| K.AMVIVVVK.G                               | N    | 86.97  | 971.5837  | 9      | 0.9  | 486.7996  | 2 | 29.88 | 12       | F12:1441 | OB5939 H1 raw.raw | 9.5124E6        | 3        | 3                   | 452   | 460 |                                       |                                                          | PEAKS DB  |
| R.SSENNEGVIVK.V                            | Y    | 86.86  | 1174.5830 | 11     | -0.3 | 588.2986  | 2 | 23.31 | 14       | F14:1084 | OB5941 H1 raw.raw | 3.5114E5        | 6        | 6                   | 357   | 367 |                                       |                                                          | PEAKS DB  |
| K.GTGNLELVAVR.K                            | N    | 86.65  | 1127.6299 | 11     | -0.8 | 564.8218  | 2 | 29.74 | 14       | F14:1450 | OB5941 H1 raw.raw | 1.0907E7        | 6        | 6                   | 461   | 471 |                                       |                                                          | PEAKS DB  |
| R.NNPFYFPSR.R                              | N    | 86.37  | 1140.5352 | 9      | -3.8 | 571.2727  | 2 | 31.46 | 14       | F14:1552 | OB5941 H1 raw.raw | 1.201E7         | 5        | 5                   | 172   | 180 |                                       |                                                          | PEAKS DB  |
| K.HADADNILVIQQGQATVTVAN(-17.03)GNNRK.S     | N    | 86.12  | 2729.3845 | 26     | -1.1 | 910.8011  | 3 | 29.38 | 14       | F14:1429 | OB5941 H1 raw.raw | 8.2265E6        | 4        | 4                   | 229   | 254 |                                       | N21:Ammunia-loss (N):18.53                               | PEAKS PTM |
| R.NTLEAAFAEAFNEIRR.V                       | N    | 86.03  | 1893.9332 | 16     | -3.6 | 947.9705  | 2 | 35.28 | 12       | F12:1741 | OB5939 H1 raw.raw | 3.4229E8        | 38       | 38                  | 319   | 334 |                                       |                                                          | PEAKS DB  |
| R.I(+27.99)FLAGDKDNVIDQIEK.Q               | N    | 85.41  | 1844.9519 | 16     | 5.2  | 923.4880  | 2 | 36.16 | 14       | F14:1844 | OB5941 H1 raw.raw | 0               | 0        | 0                   | 541   | 556 | Formylation                           | I1:Formylation:77.93                                     | PEAKS PTM |
| K.SFNLDEGH(+57.02)ALR.I                    | N    | 84.87  | 1314.6316 | 11     | -1.2 | 658.3223  | 2 | 28.05 | 12       | F12:1298 | OB5939 H1 raw.raw | 5.1176E6        | 5        | 5                   | 255   | 265 |                                       | H8:Carbamidomethylation (DHKE, X@N-term):30.36           | PEAKS PTM |
| R.K(+57.02)SFNLDEGHALR.I                   | N    | 83.09  | 1442.7266 | 12     | -0.4 | 481.9159  | 3 | 25.70 | 14       | F14:1209 | OB5941 H1 raw.raw | 2.2174E5        | 3        | 3                   | 254   | 265 | Carbamidomethylation (DHKE, X@N-term) | K1:Carbamidomethylation (DHKE, X@N-term):51.63           | PEAKS PTM |
| K.SVSKKGSEEGDITNPINLR.E                    | N    | 83.00  | 2172.1023 | 20     | 0.7  | 725.0419  | 3 | 27.21 | 14       | F14:1286 | OB5941 H1 raw.raw | 1.3065E5        | 2        | 2                   | 382   | 401 |                                       |                                                          | PEAKS DB  |
| K.KNPQLQDLDM(+15.99)MLTC(+57.02)VEIK.E     | N    | 81.54  | 2191.0686 | 18     | 0.7  | 1096.5424 | 2 | 33.03 | 12       | F12:1615 | OB5939 H1 raw.raw | 0               | 0        | 0                   | 422   | 439 | Carbamidomethylation                  | M10:Oxidation (M):14.02;C14:Carbamidomethylation:1000.00 | PEAKS DB  |
| K.KNPQLQDLDMMLTC(+57.02)VEIKEGALMLPHFNSK.A | N    | 81.26  | 3499.7336 | 30     | -0.1 | 875.9406  | 4 | 36.52 | 14       | F14:1868 | OB5941 H1 raw.raw | 1.091E7         | 3        | 3                   | 422   | 451 | Carbamidomethylation                  | C14:Carbamidomethylation:1000.00                         | PEAKS DB  |
| K.GTGNLELVAVRK.E                           | N    | 79.30  | 1255.7249 | 12     | 0.9  | 628.8702  | 2 | 26.85 | 14       | F14:1263 | OB5941 H1 raw.raw | 1.0437E7        | 9        | 9                   | 461   | 472 |                                       |                                                          | PEAKS DB  |
| R.I(+57.02)VQIEAKPNTLVLPK.H                | N    | 78.65  | 1719.0294 | 15     | 3.0  | 860.5245  | 2 | 30.75 | 12       | F12:1469 | OB5939 H1 raw.raw | 1.7854E7        | 5        | 5                   | 214   | 228 | Carbamidomethylation (DHKE, X@N-term) | I1:Carbamidomethylation (DHKE, X@N-term):97.69           | PEAKS PTM |
| R.EETSRNNPFYFPSRR.F                        | N    | 78.31  | 1898.9023 | 15     | 1.2  | 633.9755  | 3 | 27.17 | 13       | F13:1289 | OB5940 H1 raw.raw | 6.7264E6        | 6        | 6                   | 167   | 181 |                                       |                                                          | PEAKS DB  |
| R.IFLAGDKDNVIDQIE(+57.02)K.Q               | N    | 78.23  | 1873.9785 | 16     | -5.0 | 937.9919  | 2 | 32.19 | 14       | F14:1583 | OB5941 H1 raw.raw | 3.036E7         | 3        | 3                   | 541   | 556 |                                       | E15:Carbamidomethylation (DHKE, X@N-term):0.00           | PEAKS PTM |
| I.PSGFISYILNR.H                            | N    | 77.77  | 1265.6768 | 11     | 2.4  | 633.8472  | 2 | 36.17 | 13       | F13:1844 | OB5940 H1 raw.raw | 2.5204E5        | 2        | 2                   | 267   | 277 |                                       |                                                          | PEAKS DB  |
| I.FLAGDKDNVIDQIEK.Q                        | N    | 77.74  | 1703.8729 | 15     | -9.3 | 852.9358  | 2 | 32.01 | 14       | F14:1599 | OB5941 H1 raw.raw | 1.3574E6        | 3        | 3                   | 542   | 556 |                                       |                                                          | PEAKS DB  |
| K.D(+57.02)LAFFGSGEQVEK.L                  | N    | 77.21  | 1432.6833 | 13     | 3.8  | 717.3517  | 2 | 30.92 | 12       | F12:1485 | OB5939 H1 raw.raw | 2.816E5         | 1        | 1                   | 560   | 572 | Carbamidomethylation (DHKE, X@N-term) | D1:Carbamidomethylation (DHKE, X@N-term):93.18           | PEAKS PTM |
| total 217 peptides                         |      |        |           |        |      |           |   |       |          |          |                   |                 |          |                     |       |     |                                       |                                                          |           |

| Peptide                                          | Uniq | -10lgP | Mass      | Length | ppm  | m/z       | z | RT    | Fraction | Scan     | Source File        | Area Raw in gel | #Feature | #Feature Raw in gel | Start | End | PTM                  | AScore                                                                   | Found By  |
|--------------------------------------------------|------|--------|-----------|--------|------|-----------|---|-------|----------|----------|--------------------|-----------------|----------|---------------------|-------|-----|----------------------|--------------------------------------------------------------------------|-----------|
| K.K(+57.02)GSEEEGDITNPINLR.E                     | N    | 77.19  | 1827.8962 | 16     | -3.2 | 914.9525  | 2 | 28.80 | 14       | F14:1391 | OB5941 H1 raw.raw  | 0               | 0        | 0                   | 386   | 401 |                      | K1:Carbamidomethylation (DHKE, X@N-term):8.80                            | PEAKS PTM |
| R.Q(-17.03)FQNLQNHR.I                            | N    | 76.65  | 1166.5581 | 9      | -1.5 | 584.2855  | 2 | 27.77 | 14       | F14:1319 | OB5941 H1 raw.raw  | 3.3996E6        | 3        | 3                   | 205   | 213 | Pyro-glu from Q      | Q1:Pyro-glu from Q:1000.00                                               | PEAKS PTM |
| K.KGSEEEGDITN(+.98)PINLREGEDLSNNFGK.L            | Y    | 75.94  | 3059.4319 | 28     | 7.3  | 1530.7344 | 2 | 30.76 | 14       | F14:1523 | OB5941 H1 raw.raw  | 5.8148E5        | 1        | 1                   | 386   | 413 |                      | N11:Deamidation (N Q):10.86                                              | PEAKS DB  |
| K.HAD(+57.02)ADNILVIQQGQATVTVAN(+.98)GNNRK.S     | N    | 74.85  | 2804.4165 | 26     | -5.0 | 935.8081  | 3 | 28.96 | 13       | F13:1511 | OB5940 H1 raw.raw  | 3.7976E6        | 1        | 1                   | 229   | 254 |                      | D3:Carbamidomethylation (DHKE, X@N-term):6.59;N21:Deamidation (NQ):14.04 | PEAKS PTM |
| K.HADADNILVIQQGQATVTVANGN(-17.03)NRK.S           | N    | 74.65  | 2729.3845 | 26     | -3.3 | 1365.6951 | 2 | 29.38 | 14       | F14:1432 | OB5941 H1 raw.raw  | 5.4978E5        | 1        | 1                   | 229   | 254 |                      | N23:Ammonia-loss (N):0.00                                                | PEAKS PTM |
| K.ISMPVNTPGQFEDFFPASSRDQSSYLQGFSR.N              | N    | 74.49  | 3494.6201 | 31     | 2.7  | 1165.8838 | 3 | 36.29 | 2        | F2:1620  | OB5925 H3B raw.raw | 9.3886E7        | 15       | 15                  | 288   | 318 |                      |                                                                          | PEAKS DB  |
| R.NTLEAAFAEFN(+.98)EIRR.V                        | N    | 74.39  | 1894.9172 | 16     | -3.7 | 948.4624  | 2 | 32.73 | 14       | F14:1640 | OB5941 H1 raw.raw  | 4.113E6         | 3        | 3                   | 319   | 334 | Deamidation (NQ)     | N12:Deamidation (N Q):55.21                                              | PEAKS DB  |
| K.LFEVKPDKKNPQLQLDMLMTC(+57.02)VEIK.E            | N    | 73.38  | 3131.6069 | 26     | 3.7  | 1044.8801 | 3 | 33.97 | 13       | F13:1716 | OB5940 H1 raw.raw  | 3.7487E6        | 3        | 3                   | 414   | 439 | Carbamidomethylation | C22:Carbamidomethylation:1000.00                                         | PEAKS DB  |
| K.NPQLQLDMM(+15.99)LTC(+57.02)VEIKEGALMLPHFNSK.A | N    | 73.21  | 3387.6335 | 29     | 5.6  | 847.9204  | 4 | 35.82 | 13       | F13:1825 | OB5940 H1 raw.raw  | 9.6415E6        | 3        | 3                   | 423   | 451 | Carbamidomethylation | M10:Oxidation (M):16.90;C13:Carbamidomethylation:1000.00                 | PEAKS DB  |
| A.GDKDNVIDQIEK.Q                                 | N    | 73.04  | 1372.6833 | 12     | -2.8 | 687.3470  | 2 | 32.19 | 12       | F12:1561 | OB5939 H1 raw.raw  | 1.4449E6        | 3        | 3                   | 545   | 556 |                      |                                                                          | PEAKS DB  |
| R.V(+57.02)LLEENAGGEQEER.G                       | N    | 73.00  | 1628.7642 | 14     | 1.1  | 815.3903  | 2 | 27.03 | 14       | F14:1288 | OB5941 H1 raw.raw  | 2.7852E5        | 3        | 3                   | 335   | 348 |                      | V1:Carbamidomethylation (DHKE, X@N-term):44.44                           | PEAKS PTM |
| R.EETSRNNPFYFPSR.R                               | N    | 72.75  | 1742.8011 | 14     | -0.9 | 581.9405  | 3 | 29.89 | 12       | F12:1419 | OB5939 H1 raw.raw  | 4.0306E4        | 1        | 1                   | 167   | 180 |                      |                                                                          | PEAKS DB  |
| R.IPSGFISYILN(-17.03)R.H                         | N    | 72.57  | 1361.7343 | 12     | 1.4  | 681.8754  | 2 | 37.47 | 13       | F13:1926 | OB5940 H1 raw.raw  | 5.3561E5        | 2        | 2                   | 266   | 277 | Ammonia-loss (N)     | N11:Ammonia-loss (N):1000.00                                             | PEAKS PTM |
| R.IPSGFISY(+125.90)ILNR.H                        | N    | 72.49  | 1504.6575 | 12     | 1.5  | 753.3372  | 2 | 37.84 | 13       | F13:1946 | OB5940 H1 raw.raw  | 9.8379E5        | 2        | 2                   | 266   | 277 | Iodination           | Y8:Iodination:1000.00                                                    | PEAKS PTM |
| R.IPSGFISYILNRH(+57.02)DNQNL.R.V                 | N    | 72.20  | 2313.1978 | 19     | 2.0  | 579.3079  | 4 | 33.29 | 12       | F12:1633 | OB5939 H1 raw.raw  | 3.81E7          | 4        | 4                   | 266   | 284 |                      | H13:Carbamidomethylation (DHKE, X@N-term):9.34                           | PEAKS PTM |
| R.VLLEEN(+.98)AGGEQEER.G                         | N    | 71.59  | 1572.7267 | 14     | -3.7 | 787.3677  | 2 | 26.82 | 13       | F13:1276 | OB5940 H1 raw.raw  | 0               | 0        | 0                   | 335   | 348 | Deamidation (NQ)     | N6:Deamidation (NQ):71.64                                                | PEAKS DB  |
| A.FPGSGEQVEK.L                                   | N    | 71.45  | 1076.5138 | 10     | 5.5  | 539.2672  | 2 | 30.23 | 12       | F12:1449 | OB5939 H1 raw.raw  | 6.1112E4        | 1        | 1                   | 563   | 572 |                      |                                                                          | PEAKS DB  |
| R.E(-18.01)GE(+57.02)QEWGTPGSHVR.E               | N    | 71.00  | 1606.7124 | 14     | 0.1  | 804.3635  | 2 | 27.42 | 14       | F14:1300 | OB5941 H1 raw.raw  | 8.0689E4        | 3        | 3                   | 153   | 166 | Pyro-glu from E      | E1:Pyro-glu from E:1000.00;E3:Carbamidomethylation                       | PEAKS PTM |
| total 217 peptides                               |      |        |           |        |      |           |   |       |          |          |                    |                 |          |                     |       |     |                      |                                                                          |           |

| Peptide                                               | Uniq | -10lgP | Mass      | Length | ppm  | m/z       | z | RT    | Fraction | Scan     | Source File        | Area Raw in gel | #Feature | #Feature Raw in gel | Start | End | PTM                                   | AScore                                                                                  | Found By  |
|-------------------------------------------------------|------|--------|-----------|--------|------|-----------|---|-------|----------|----------|--------------------|-----------------|----------|---------------------|-------|-----|---------------------------------------|-----------------------------------------------------------------------------------------|-----------|
|                                                       |      |        |           |        |      |           |   |       |          |          |                    |                 |          |                     |       |     |                                       | thylation (DHKE, X@N-term):45.01                                                        |           |
| K.A(+57.02)MVIVVVKGTGNLELVAVRK.E                      | N    | 70.77  | 2266.3196 | 21     | -1.6 | 1134.1653 | 2 | 32.33 | 13       | F13:1602 | OB5940 H1 raw.raw  | 4.861E7         | 6        | 6                   | 452   | 472 | Carbamidomethylation (DHKE, X@N-term) | A1:Carbamidomethylation (DHKE, X@N-term):161.20                                         | PEAKS PTM |
| K.AM(+15.99)VIVVVK.G                                  | N    | 70.64  | 987.5787  | 9      | 0.7  | 494.7969  | 2 | 26.66 | 14       | F14:1257 | OB5941 H1 raw.raw  | 8.6431E5        | 3        | 3                   | 452   | 460 | Oxidation (M)                         | M2:Oxidation (M):100.0.00                                                               | PEAKS DB  |
| K.KNPQLQLDMLMTC(+57.02)VEIKEGALM(+15.99)LPHFNSK.A     | N    | 70.55  | 3515.7285 | 30     | -0.8 | 879.9387  | 4 | 35.84 | 12       | F12:1790 | OB5939 H1 raw.raw  | 4.7958E6        | 2        | 2                   | 422   | 451 | Carbamidomethylation; Oxidation (M)   | C14:Carbamidomethylation:1000.00;M23:Oxidation (M):69.38                                | PEAKS DB  |
| K.VSKEHVEELTK.H                                       | N    | 69.86  | 1297.6877 | 11     | 0.8  | 433.5702  | 3 | 24.82 | 12       | F12:1120 | OB5939 H1 raw.raw  | 1.1162E5        | 6        | 6                   | 368   | 378 |                                       |                                                                                         | PEAKS DB  |
| Q.GQATVTVAN(+.98)GNNRK.S                              | N    | 69.60  | 1429.7273 | 14     | -4.1 | 715.8680  | 2 | 29.38 | 14       | F14:1424 | OB5941 H1 raw.raw  | 5.134E5         | 2        | 2                   | 241   | 254 |                                       | N9:Deamidation (NQ):41.83                                                               | PEAKS DB  |
| R.NT(-18.01)LEAAFNAEFNEIRR.V                          | N    | 68.32  | 1875.9227 | 16     | -3.2 | 626.3129  | 3 | 33.81 | 14       | F14:1704 | OB5941 H1 raw.raw  | 1.3248E7        | 3        | 3                   | 319   | 334 | Dehydration                           | T2:Dehydration:1000.0.0                                                                 | PEAKS PTM |
| R.SSEN(+.98)NEGVIVK.V                                 | Y    | 68.21  | 1175.5670 | 11     | 0.8  | 588.7913  | 2 | 24.17 | 14       | F14:1126 | OB5941 H1 raw.raw  | 1.8176E4        | 2        | 2                   | 357   | 367 |                                       | N4:Deamidation (NQ):20.00                                                               | PEAKS DB  |
| R.SRQFQNLQNHR.I                                       | N    | 67.97  | 1426.7178 | 11     | -0.3 | 476.5797  | 3 | 24.94 | 14       | F14:1159 | OB5941 H1 raw.raw  | 1.4052E4        | 2        | 2                   | 203   | 213 |                                       |                                                                                         | PEAKS DB  |
| K.LFEVKPKKNPQLQLDLM(+15.99)M(+15.99)LTC(+57.02)VEIK.E | N    | 67.75  | 3163.5967 | 26     | 2.1  | 791.9081  | 4 | 32.37 | 12       | F12:1585 | OB5939 H1 raw.raw  | 6.2675E5        | 1        | 1                   | 414   | 439 | Oxidation (M); Carbamidomethylation   | M18:Oxidation (M):100.0.00;M19:Oxidation (M):1000.0.0;C22:Carbamidomethylation:100.0.00 | PEAKS DB  |
| L.AGDKDNVIDQIEK.Q                                     | N    | 66.85  | 1443.7205 | 13     | -3.1 | 722.8653  | 2 | 32.19 | 12       | F12:1560 | OB5939 H1 raw.raw  | 7.0907E5        | 2        | 2                   | 544   | 556 |                                       |                                                                                         | PEAKS DB  |
| K.G(+57.02)TGNLELVAVRK.E                              | N    | 66.68  | 1312.7462 | 12     | -0.7 | 657.3799  | 2 | 26.85 | 14       | F14:1280 | OB5941 H1 raw.raw  | 3.417E5         | 3        | 3                   | 461   | 472 | Carbamidomethylation (DHKE, X@N-term) | G1:Carbamidomethylation (DHKE, X@N-term):56.51                                          | PEAKS PTM |
| K.SFNLDEGHALRIPSGFISYILNRHDNQNL.R.V                   | N    | 66.45  | 3495.7759 | 30     | -1.2 | 700.1616  | 5 | 36.31 | 13       | F13:1855 | OB5940 H1 raw.raw  | 1.2605E8        | 16       | 16                  | 255   | 284 |                                       |                                                                                         | PEAKS DB  |
| R.QFQNLQNHR.I                                         | N    | 66.40  | 1183.5846 | 9      | 0.2  | 592.7997  | 2 | 24.53 | 14       | F14:1134 | OB5941 H1 raw.raw  | 7.3427E4        | 5        | 5                   | 205   | 213 |                                       |                                                                                         | PEAKS DB  |
| D.KDNVIDQIEK.Q                                        | N    | 66.36  | 1200.6350 | 10     | -0.8 | 601.3243  | 2 | 25.89 | 14       | F14:1225 | OB5941 H1 raw.raw  | 5.8609E4        | 3        | 3                   | 547   | 556 |                                       |                                                                                         | PEAKS DB  |
| K.NPQLQ(+.98)DLDMMLTTC(+57.02)VEIKEGALMLPHFNSK.A      | N    | 66.16  | 3372.6226 | 29     | 5.7  | 1125.2212 | 3 | 37.84 | 13       | F13:1936 | OB5940 H1 raw.raw  | 5.3127E7        | 3        | 3                   | 423   | 451 | Carbamidomethylation                  | Q5:Deamidation (NQ):32.28;C13:Carbamidomethylation:1000.00                              | PEAKS DB  |
| K.HADADNILVIQQQATVTVANGNN(+.98)RK.S                   | N    | 65.93  | 2747.3950 | 26     | 4.5  | 1374.7109 | 2 | 29.70 | 10       | F10:1444 | OB5937 H3A raw.raw | 5.6818E5        | 3        | 3                   | 229   | 254 |                                       | N24:Deamidation (NQ):14.02                                                              | PEAKS DB  |
| K.ISMPVNTPGQ(+.98)FEDFFPASSR.D                        | N    | 65.70  | 2227.0254 | 20     | 6.4  | 1114.5271 | 2 | 63.55 | 14       | F14:3427 | OB5941 H1 raw.raw  | 1.0155E4        | 2        | 2                   | 288   | 307 |                                       | Q10:Deamidation (NQ):33.26                                                              | PEAKS DB  |
| total 217 peptides                                    |      |        |           |        |      |           |   |       |          |          |                    |                 |          |                     |       |     |                                       |                                                                                         |           |

| Peptide                                                   | Uniq | -10lgP | Mass      | Length | ppm  | m/z       | z | RT    | Fraction | Scan     | Source File        | Area Raw in gel | #Feature | #Feature Raw in gel | Start | End | PTM                                                  | AScore                                                                          | Found By  |
|-----------------------------------------------------------|------|--------|-----------|--------|------|-----------|---|-------|----------|----------|--------------------|-----------------|----------|---------------------|-------|-----|------------------------------------------------------|---------------------------------------------------------------------------------|-----------|
| R.N(+.98)TLEAFNAEFNEIRR.V                                 | N    | 65.61  | 1894.9172 | 16     | 2.2  | 948.4680  | 2 | 35.88 | 12       | F12:1787 | OB5939 H1 raw.raw  | 7.0859E7        | 1        | 1                   | 319   | 334 | Deamidation (NQ)                                     | N1:Deamidation (NQ):61.82                                                       | PEAKS DB  |
| K.KNPQLQDLDM(+15.99)MLTC(+57.02)VEIKEGALMLPHFNSK.A        | N    | 65.47  | 3515.7285 | 30     | -3.1 | 879.9366  | 4 | 35.44 | 13       | F13:1830 | OB5940 H1 raw.raw  | 7.2415E6        | 3        | 3                   | 422   | 451 | Carbamidomethylation                                 | M10:Oxidation (M):11.06;C14:Carbamidomethylation:1000.00                        | PEAKS DB  |
| K.ISM(+15.99)PVNTPGQ(+.98)FEDFFPASSRDQSSYLQGFNR.N         | N    | 65.25  | 3511.5989 | 31     | 4.3  | 1171.5453 | 3 | 34.92 | 12       | F12:1731 | OB5939 H1 raw.raw  | 1.4851E6        | 1        | 1                   | 288   | 318 | Oxidation (M)                                        | M3:Oxidation (M):100.00;Q10:Deamidation (NQ):27.62                              | PEAKS DB  |
| K.NPQLQDLDM(+15.99)MLTC(+57.02)VEIKEGALM(+15.99)LPHFNSK.A | N    | 64.53  | 3403.6284 | 29     | 4.5  | 1135.5552 | 3 | 36.52 | 14       | F14:1873 | OB5941 H1 raw.raw  | 4.3451E6        | 3        | 3                   | 423   | 451 | Carbamidomethylation; Oxidation (M)                  | M9:Oxidation (M):10.11;C13:Carbamidomethylation:1000.00;M22:Oxidation (M):53.09 | PEAKS DB  |
| K.LFEVKPDK.K                                              | N    | 63.66  | 974.5436  | 8      | 0.9  | 488.2795  | 2 | 25.40 | 12       | F12:1153 | OB5939 H1 raw.raw  | 6.8606E5        | 7        | 7                   | 414   | 421 |                                                      |                                                                                 | PEAKS DB  |
| F.NLDEGHALR.I                                             | N    | 63.51  | 1023.5097 | 9      | 2.3  | 512.7633  | 2 | 27.35 | 13       | F13:1309 | OB5940 H1 raw.raw  | 1.5878E6        | 3        | 3                   | 257   | 265 |                                                      |                                                                                 | PEAKS DB  |
| V.QIEAKPNTLVLPK.H                                         | N    | 63.24  | 1449.8555 | 13     | -3.5 | 725.9325  | 2 | 29.92 | 14       | F14:1467 | OB5941 H1 raw.raw  | 1.2653E6        | 3        | 3                   | 216   | 228 |                                                      |                                                                                 | PEAKS DB  |
| R.EGEQEWGTPGSHVRETSR.N                                    | N    | 63.23  | 2169.9675 | 19     | 2.1  | 724.3313  | 3 | 25.88 | 14       | F14:1208 | OB5941 H1 raw.raw  | 2.2911E6        | 7        | 7                   | 153   | 171 |                                                      |                                                                                 | PEAKS DB  |
| K.ISM(-48.00)PVNTPGQGFEDFFPASSR.D                         | N    | 62.93  | 2178.0381 | 20     | 0.2  | 727.0201  | 3 | 32.37 | 12       | F12:1577 | OB5939 H1 raw.raw  | 2.6788E7        | 5        | 5                   | 288   | 307 | Dethiomethyl                                         | M3:Dethiomethyl:100.00                                                          | PEAKS PTM |
| N.TPGQFEDFFPASSR.D                                        | N    | 62.85  | 1584.7208 | 14     | -0.2 | 793.3676  | 2 | 35.63 | 14       | F14:1821 | OB5941 H1 raw.raw  | 2.1663E5        | 1        | 1                   | 294   | 307 |                                                      |                                                                                 | PEAKS DB  |
| K.A(+57.02)M(+15.99)VIVVVNKGTNLELVAVR.K                   | N    | 62.49  | 2154.2195 | 20     | -0.1 | 1078.1169 | 2 | 32.92 | 12       | F12:1614 | OB5939 H1 raw.raw  | 4.5509E5        | 2        | 2                   | 452   | 471 | Carbamidomethylation (DHKE, X@N-term); Oxidation (M) | A1:Carbamidomethylation (DHKE, X@N-term):139.69; M2:Oxidation (M):100.00        | PEAKS PTM |
| L.EAAFNAEFNEIRR.V                                         | N    | 62.30  | 1565.7585 | 13     | -4.7 | 783.8829  | 2 | 34.06 | 12       | F12:1677 | OB5939 H1 raw.raw  | 6.1232E5        | 1        | 1                   | 322   | 334 |                                                      |                                                                                 | PEAKS DB  |
| K.N(+.98)PQLQDLDMMLTC(+57.02)VEIKEGALMLPHFNSK.A           | N    | 61.86  | 3372.6226 | 29     | 5.7  | 1125.2212 | 3 | 37.84 | 13       | F13:1983 | OB5940 H1 raw.raw  | 1.2903E7        | 1        | 1                   | 423   | 451 | Carbamidomethylation                                 | N1:Deamidation (NQ):14.04;C13:Carbamidomethylation:1000.00                      | PEAKS DB  |
| K.HADADNILVIQQGQ(+.98)ATVTVAN(+.98)GNNRK.S                | N    | 61.75  | 2748.3792 | 26     | 1.4  | 1375.1987 | 2 | 29.55 | 13       | F13:1443 | OB5940 H1 raw.raw  | 4.856E5         | 1        | 1                   | 229   | 254 |                                                      | Q14:Deamidation (NQ):32.28;N21:Deamidation (NQ):14.04                           | PEAKS DB  |
| N.LDEGHALR.I                                              | N    | 60.44  | 909.4668  | 8      | 0.6  | 455.7409  | 2 | 27.35 | 13       | F13:1312 | OB5940 H1 raw.raw  | 3.1152E4        | 1        | 1                   | 258   | 265 |                                                      |                                                                                 | PEAKS DB  |
| R.WGPAGPR.E                                               | N    | 59.30  | 739.3765  | 7      | -0.2 | 370.6955  | 2 | 24.50 | 13       | F13:1143 | OB5940 H1 raw.raw  | 2.137E5         | 2        | 2                   | 115   | 121 |                                                      |                                                                                 | PEAKS DB  |
| R.IFLAGDKDNVIDQ(+.98)IEKQAK.D                             | N    | 58.72  | 2145.1316 | 19     | 9.3  | 716.0578  | 3 | 32.93 | 2        | F2:1432  | OB5925 H3B raw.raw | 1.5596E6        | 1        | 1                   | 541   | 559 |                                                      | Q13:Deamidation (NQ):0.00                                                       | PEAKS DB  |
| total 217 peptides                                        |      |        |           |        |      |           |   |       |          |          |                    |                 |          |                     |       |     |                                                      |                                                                                 |           |

| Peptide                                          | Uniq | -10lgP | Mass      | Length | ppm  | m/z       | z | RT    | Fraction | Scan     | Source File       | Area Raw in gel | #Feature | #Feature Raw in gel | Start | End | PTM                                           | AScore                                                                            | Found By  |
|--------------------------------------------------|------|--------|-----------|--------|------|-----------|---|-------|----------|----------|-------------------|-----------------|----------|---------------------|-------|-----|-----------------------------------------------|-----------------------------------------------------------------------------------|-----------|
| K.HADADNILVIQ(+.98)Q(+.98)GQATVTVAN(+.98)GNNRK.S | N    | 58.62  | 2749.3630 | 26     | 9.6  | 917.4705  | 3 | 30.18 | 13       | F13:1524 | OB5940 H1 raw.raw | 4.3812E6        | 1        | 1                   | 229   | 254 |                                               | Q11:Deamidation (N Q):26.52;Q12:Deamidation (NQ):18.53;N21:Deamidation (NQ):14.04 | PEAKS DB  |
| R.D(+57.02)QSSYLQGFSR.N                          | N    | 58.49  | 1343.6106 | 11     | -2.5 | 672.8109  | 2 | 31.19 | 12       | F12:1506 | OB5939 H1 raw.raw | 3.7713E4        | 1        | 1                   | 308   | 318 | Carbamidomethylation (DHKE, X@N-term):1000.00 | D1:Carbamidomethylation (DHKE, X@N-term):1000.00                                  | PEAKS PTM |
| K.HADADNILVIQ(+.98)QGQATVTVAN(+.98)GNNRK.S       | N    | 58.29  | 2748.3792 | 26     | 4.6  | 1375.2031 | 2 | 31.28 | 12       | F12:1539 | OB5939 H1 raw.raw | 1.8636E5        | 1        | 1                   | 229   | 254 |                                               | Q11:Deamidation (N Q):15.10;N21:Deamidation (NQ):17.01                            | PEAKS DB  |
| K.HADADN(+.98)ILVIQ(+.98)QGQATVTVANGNNRK.S       | N    | 57.75  | 2748.3792 | 26     | 3.1  | 1375.2010 | 2 | 30.08 | 14       | F14:1495 | OB5941 H1 raw.raw | 1.5756E6        | 1        | 1                   | 229   | 254 |                                               | N6:Deamidation (NQ):0.00;Q11:Deamidation (NQ):0.00                                | PEAKS DB  |
| N.PFYFPSRR.F                                     | N    | 57.72  | 1068.5504 | 8      | 3.3  | 535.2842  | 2 | 28.95 | 12       | F12:1360 | OB5939 H1 raw.raw | 3.0845E6        | 3        | 3                   | 174   | 181 |                                               |                                                                                   | PEAKS DB  |
| K.LFEVKPKKPNQLQDLDMM(+15.99)LTC(+57.02)VEIK.E    | N    | 57.62  | 3147.6018 | 26     | -4.4 | 787.9042  | 4 | 32.55 | 14       | F14:1633 | OB5941 H1 raw.raw | 2.1102E6        | 3        | 3                   | 414   | 439 | Carbamidomethylation                          | M19:Oxidation (M):17.01;C22:Carbamidomethylation:1000.00                          | PEAKS DB  |
| K.SFN(+.98)LDEGHALRIPSGFISYILNR.H                | N    | 57.28  | 2619.3445 | 23     | 9.3  | 655.8495  | 4 | 38.22 | 12       | F12:1947 | OB5939 H1 raw.raw | 1.0265E6        | 2        | 2                   | 255   | 277 |                                               | N3:Deamidation (NQ):32.08                                                         | PEAKS DB  |
| K.KGSEEEGDITNPIN(+.98)LREGEPDLSNNGK.L            | Y    | 57.09  | 3059.4319 | 28     | 7.3  | 1530.7344 | 2 | 30.76 | 14       | F14:1531 | OB5941 H1 raw.raw | 5.8148E5        | 1        | 1                   | 386   | 413 |                                               | N14:Deamidation (N Q):35.60                                                       | PEAKS DB  |
| K.AMVIVVVN(+.98)KGTGNLELVAVRK.E                  | N    | 56.84  | 2210.2820 | 21     | 9.6  | 737.7750  | 3 | 33.10 | 14       | F14:1664 | OB5941 H1 raw.raw | 8.0625E6        | 2        | 2                   | 452   | 472 |                                               | N8:Deamidation (NQ):41.87                                                         | PEAKS DB  |
| K.KNPQLQDLDMM(-48.00)LTC(+57.02)VEIK.E           | N    | 56.43  | 2127.0703 | 18     | 0.8  | 710.0312  | 3 | 31.11 | 14       | F14:1538 | OB5941 H1 raw.raw | 3.3192E6        | 2        | 2                   | 422   | 439 | Carbamidomethylation                          | M11:Dethiomethyl:14.02;C14:Carbamidomethylation:1000.00                           | PEAKS PTM |
| K.ISM(+15.99)PVNTPGQFEDFFPASSRDQSSYLQGFSR.N      | N    | 56.19  | 3510.6150 | 31     | 2.9  | 1171.2157 | 3 | 34.90 | 14       | F14:1765 | OB5941 H1 raw.raw | 1.0055E7        | 8        | 8                   | 288   | 318 | Oxidation (M)                                 | M3:Oxidation (M):1000.00                                                          | PEAKS DB  |
| R.IVQIEAK(+57.02)PNTLVLPK.H                      | N    | 56.13  | 1719.0294 | 15     | -1.6 | 860.5206  | 2 | 30.60 | 14       | F14:1466 | OB5941 H1 raw.raw | 1.1048E7        | 2        | 2                   | 214   | 228 | Carbamidomethylation (DHKE, X@N-term)         | K7:Carbamidomethylation (DHKE, X@N-term):51.51                                    | PEAKS PTM |
| K.IRPEGREGQEWEVTPGSHVR.E                         | N    | 56.05  | 2276.1045 | 20     | 0.7  | 570.0338  | 4 | 26.47 | 14       | F14:1255 | OB5941 H1 raw.raw | 1.8795E5        | 1        | 1                   | 147   | 166 |                                               |                                                                                   | PEAKS DB  |
| R.N(+57.02)NPFYFPSRR.F                           | N    | 55.47  | 1353.6577 | 10     | -2.6 | 677.8344  | 2 | 29.38 | 14       | F14:1433 | OB5941 H1 raw.raw | 6.1234E5        | 2        | 2                   | 172   | 181 | Carbamidomethylation (DHKE, X@N-term):1000.00 | N1:Carbamidomethylation (DHKE, X@N-term):1000.00                                  | PEAKS PTM |
| K.HADADNILVIQQGQATVTVANGN(+.98)NRK.S             | N    | 55.13  | 2747.3950 | 26     | 4.2  | 687.8589  | 4 | 29.51 | 12       | F12:1401 | OB5939 H1 raw.raw | 2.4633E7        | 5        | 5                   | 229   | 254 |                                               | N23:Deamidation (N Q):17.01                                                       | PEAKS DB  |
| K.HADADNILVIQQ(+.98)GQ(+.98)ATVTVAN(+.98)GNNRK.S | N    | 55.12  | 2749.3630 | 26     | 9.6  | 917.4705  | 3 | 30.18 | 13       | F13:1487 | OB5940 H1 raw.raw | 4.3812E6        | 1        | 1                   | 229   | 254 |                                               | Q12:Deamidation (N Q):14.02;Q14:Deamidation (NQ):14.04                            | PEAKS DB  |
| total 217 peptides                               |      |        |           |        |      |           |   |       |          |          |                   |                 |          |                     |       |     |                                               |                                                                                   |           |

| Peptide                                                       | Uniq | -10lgP | Mass      | Length | ppm  | m/z       | z | RT    | Fraction | Scan     | Source File       | Area Raw in gel | #Feature | #Feature Raw in gel | Start | End | PTM                                    | AScore                                                                            | Found By  |
|---------------------------------------------------------------|------|--------|-----------|--------|------|-----------|---|-------|----------|----------|-------------------|-----------------|----------|---------------------|-------|-----|----------------------------------------|-----------------------------------------------------------------------------------|-----------|
|                                                               |      |        |           |        |      |           |   |       |          |          |                   |                 |          |                     |       |     |                                        | ation (NQ): 13.03;N21: Deamidation (NQ):11.10                                     |           |
| K.AM(-48.00)VIVVVNKG TGNLELVA VRK.E                           | N    | 54.93  | 2161.2947 | 21     | 1.4  | 1081.6561 | 2 | 29.80 | 14       | F14:1453 | OB5941 H1 raw.raw | 1.7581E6        | 2        | 2                   | 452   | 472 | Dethiomethyl                           | M2:Dethiomethyl:100.0.00                                                          | PEAKS PTM |
| K.NPQLQLDLM(+15.99)MLTC(+57.02)VEIKEGALMLPHFN(+.98)SK.A       | N    | 54.06  | 3388.6174 | 29     | 5.0  | 848.1659  | 4 | 36.17 | 14       | F14:1849 | OB5941 H1 raw.raw | 6.0156E6        | 2        | 2                   | 423   | 451 | Carbamidomethylation; Deamidation (NQ) | M9:Oxidation (M):14.02;C13:Carbamidomethylation:100.00;N27:Deamidation (NQ):58.23 | PEAKS DB  |
| R.IFLAGDKDNVIDQIE(+57.02)KQAK.D                               | N    | 52.99  | 2201.1692 | 19     | -2.0 | 734.7289  | 3 | 31.83 | 13       | F13:1588 | OB5940 H1 raw.raw | 3.3379E6        | 2        | 2                   | 541   | 559 |                                        | E15:Carbamidomethylation (DHKE, X@N-term):12.28                                   | PEAKS PTM |
| K.NPQLQLDMLMLTC(+57.02)VEIKEGALMLPHFN(+.98)SK.A               | N    | 52.89  | 3372.6226 | 29     | 7.4  | 844.1691  | 4 | 37.85 | 13       | F13:1914 | OB5940 H1 raw.raw | 5.2564E7        | 2        | 2                   | 423   | 451 | Carbamidomethylation; Deamidation (NQ) | C13:Carbamidomethylation:100.00;N27:Deamidation (NQ):61.84                        | PEAKS DB  |
| K.HADADNILVIQGGQ(+.98)ATVTVANGNNRK.S                          | N    | 52.87  | 2747.3950 | 26     | 5.1  | 916.8103  | 3 | 44.47 | 12       | F12:2283 | OB5939 H1 raw.raw | 1.466E5         | 1        | 1                   | 229   | 254 |                                        | Q14:Deamidation (NQ):14.04                                                        | PEAKS DB  |
| K.NPQLQLDLM(+15.99)M(+15.99)LTC(+57.02)VEIKEGALMLPHFNSK.A     | N    | 52.70  | 3403.6284 | 29     | -4.3 | 1135.5452 | 3 | 35.63 | 14       | F14:1818 | OB5941 H1 raw.raw | 1.9434E6        | 2        | 2                   | 423   | 451 | Oxidation (M); Carbamidomethylation    | M9:Oxidation (M):49.75;M10:Oxidation (M):51.99;C13:Carbamidomethylation:1000.00   | PEAKS DB  |
| L.DEGHALR.I                                                   | N    | 52.68  | 796.3828  | 7      | 2.3  | 399.1996  | 2 | 27.87 | 12       | F12:1309 | OB5939 H1 raw.raw | 2.418E4         | 1        | 1                   | 259   | 265 |                                        |                                                                                   | PEAKS DB  |
| K.DLAFPGSGEQVEK(+57.02)LIK.N                                  | N    | 52.57  | 1786.9464 | 16     | -3.8 | 894.4771  | 2 | 32.91 | 14       | F14:1654 | OB5941 H1 raw.raw | 6.7177E5        | 1        | 1                   | 560   | 575 |                                        | K13:Carbamidomethylation (DHKE, X@N-term):27.96                                   | PEAKS PTM |
| K.KN(+.98)PQLQLDMM(+15.99)LTC(+57.02)VEIK.E                   | N    | 52.31  | 2192.0527 | 18     | 9.2  | 1097.0437 | 2 | 32.33 | 13       | F13:1621 | OB5940 H1 raw.raw | 8.5775E4        | 1        | 1                   | 422   | 439 | Carbamidomethylation                   | N2:Deamidation (NQ):14.04;M11:Oxidation (M):0.00;C14:Carbamidomethylation:1000.00 | PEAKS DB  |
| R.IVQIEAKPNTLVLPK(+57.02).H                                   | N    | 52.13  | 1719.0294 | 15     | 3.0  | 860.5245  | 2 | 30.75 | 12       | F12:1437 | OB5939 H1 raw.raw | 4.8623E6        | 1        | 1                   | 214   | 228 |                                        | K15:Carbamidomethylation (DHKE, X@N-term):25.69                                   | PEAKS PTM |
| Q.GQATVTVANGNNRK.S                                            | N    | 51.97  | 1428.7433 | 14     | -0.2 | 715.3788  | 2 | 29.02 | 14       | F14:1412 | OB5941 H1 raw.raw | 1.2099E5        | 2        | 2                   | 241   | 254 |                                        |                                                                                   | PEAKS DB  |
| K.EGALMLPH(+14.02)FNSK.A                                      | N    | 51.73  | 1356.6860 | 12     | 1.3  | 679.3512  | 2 | 30.49 | 14       | F14:1499 | OB5941 H1 raw.raw | 2.5741E4        | 1        | 1                   | 440   | 451 | Methylation(others)                    | H8:Methylation(others):53.53                                                      | PEAKS PTM |
| K.N(+.98)PQLQ(+.98)DLDMMLTC(+57.02)VEIKEGALM(+15.99)LPHFNSK.A | N    | 51.60  | 3389.6016 | 29     | 9.0  | 848.4153  | 4 | 36.92 | 12       | F12:1868 | OB5939 H1 raw.raw | 2.6873E6        | 1        | 1                   | 423   | 451 | Carbamidomethylation                   | N1:Deamidation (NQ):0.00;Q5:Deamidation (NQ):14.04;C13:Carbamidomethylation:100   | PEAKS DB  |
| total 217 peptides                                            |      |        |           |        |      |           |   |       |          |          |                   |                 |          |                     |       |     |                                        |                                                                                   |           |



| Peptide                                                       | Uniq | -10lgP | Mass      | Length | ppm  | m/z       | z | RT    | Fraction | Scan     | Source File       | Area Raw in gel | #Feature | #Feature Raw in gel | Start | End | PTM                                 | AScore                                                                                                        | Found By  |
|---------------------------------------------------------------|------|--------|-----------|--------|------|-----------|---|-------|----------|----------|-------------------|-----------------|----------|---------------------|-------|-----|-------------------------------------|---------------------------------------------------------------------------------------------------------------|-----------|
|                                                               |      |        |           |        |      |           |   |       |          |          |                   |                 |          |                     |       |     |                                     | 0.00;M22:Oxidation (M):18.84                                                                                  |           |
| K.LFEVKPKKK.N                                                 | N    | 50.85  | 1102.6385 | 9      | 1.1  | 552.3271  | 2 | 24.94 | 14       | F14:1179 | OB5941 H1 raw.raw | 2.3081E5        | 2        | 2                   | 414   | 422 |                                     |                                                                                                               | PEAKS DB  |
| R.RVLLEENAGGEQEERGQR.R                                        | N    | 50.67  | 2069.0249 | 18     | 2.1  | 690.6837  | 3 | 24.88 | 13       | F13:1165 | OB5940 H1 raw.raw | 2.7227E5        | 1        | 1                   | 334   | 351 |                                     |                                                                                                               | PEAKS DB  |
| K.N(+.98)PQLQDLDMMLTC(+57.02)VEIKEGALM(+15.99)LPHFNSK.A       | N    | 50.17  | 3388.6174 | 29     | -2.4 | 1130.5437 | 3 | 36.35 | 13       | F13:1874 | OB5940 H1 raw.raw | 8.9006E5        | 1        | 1                   | 423   | 451 | Carbamidomethylation; Oxidation (M) | N1:Deamidation (NQ): 0.00;C13:Carbamidomethylation: 1000.00;M22:Oxidation (M):54.40                           | PEAKS DB  |
| K.NPQLQDLDMM(+15.99)LTC(+57.02)VEIKEGALM(+15.99)LPHFNSK.A     | N    | 48.97  | 3403.6284 | 29     | 2.7  | 1135.5531 | 3 | 35.09 | 14       | F14:1786 | OB5941 H1 raw.raw | 3.2001E5        | 1        | 1                   | 423   | 451 | Carbamidomethylation                | M10:Oxidation (M):12.28;C13:Carbamidomethylation:1000.00;M22:Oxidation (M):28.29                              | PEAKS DB  |
| K.KN(+.98)PQLQDLDMMLTC(+57.02)VEIKEGALMLPHFNSK.A              | N    | 48.84  | 3500.7175 | 30     | 7.1  | 876.1929  | 4 | 36.26 | 13       | F13:1847 | OB5940 H1 raw.raw | 2.2113E6        | 1        | 1                   | 422   | 451 | Carbamidomethylation                | N2:Deamidation (NQ): 0.00;C14:Carbamidomethylation: 1000.00                                                   | PEAKS DB  |
| R.IFLAGDKDNVIDQIEK(+57.02)QAK.D                               | N    | 48.82  | 2201.1692 | 19     | 2.7  | 734.7323  | 3 | 32.55 | 12       | F12:1581 | OB5939 H1 raw.raw | 3.2958E6        | 1        | 1                   | 541   | 559 |                                     | K16:Carbamidomethylation (DHKE, X@N-term):15.91                                                               | PEAKS PTM |
| R.EREEDWRQPR.E                                                | N    | 48.49  | 1399.6592 | 10     | 0.1  | 467.5604  | 3 | 24.77 | 14       | F14:1154 | OB5941 H1 raw.raw | 2.5247E4        | 1        | 1                   | 124   | 133 |                                     |                                                                                                               | PEAKS DB  |
| R.KSFN(+.98)LDEGHALRIPSGFISYILNR.H                            | N    | 47.51  | 2747.4395 | 24     | 4.5  | 687.8702  | 4 | 36.15 | 14       | F14:1837 | OB5941 H1 raw.raw | 1.0524E6        | 1        | 1                   | 254   | 277 |                                     | N4:Deamidation (NQ): 23.98                                                                                    | PEAKS DB  |
| K.LFEVKPKKKN(+.98)PQLQDLDMMLTC(+57.02)VEIK.E                  | N    | 47.32  | 3132.5908 | 26     | 9.3  | 1567.3173 | 2 | 34.35 | 14       | F14:1745 | OB5941 H1 raw.raw | 1.9315E5        | 1        | 1                   | 414   | 439 | Carbamidomethylation                | N10:Deamidation (NQ):14.04;C22:Carbamidomethylation:1000.00                                                   | PEAKS DB  |
| K.N(+.98)PQ(+.98)LQDLDMMLTC(+57.02)VEIKEGALM(+15.99)LPHFNSK.A | N    | 46.82  | 3389.6016 | 29     | 9.0  | 848.4153  | 4 | 36.92 | 12       | F12:1851 | OB5939 H1 raw.raw | 7.3613E6        | 2        | 2                   | 423   | 451 | Carbamidomethylation                | N1:Deamidation (NQ): 11.12;Q3:Deamidation (NQ):0.00;C13:Carbamidomethylation:1000.00;M22:Oxidation (M): 24.93 | PEAKS DB  |
| N.PQLQDLDMMLTC(+57.02)VEIKEGALMLPHFNSK.A                      | N    | 46.63  | 3257.5957 | 28     | 0.9  | 815.4069  | 4 | 37.83 | 14       | F14:1952 | OB5941 H1 raw.raw | 2.3692E5        | 1        | 1                   | 424   | 451 | Carbamidomethylation                | C12:Carbamidomethylation:1000.00                                                                              | PEAKS DB  |
| R.S(+57.02)SENNEGVIVK.V                                       | Y    | 46.57  | 1231.6044 | 11     | -0.2 | 616.8093  | 2 | 23.54 | 14       | F14:1091 | OB5941 H1 raw.raw | 1.0427E3        | 1        | 1                   | 357   | 367 |                                     | S1:Carbamidomethylation (DHKE, X@N-term):20.41                                                                | PEAKS PTM |
| K.Q(-17.03)AKDLAFPGSGEQVEK.L                                  | N    | 46.49  | 1685.8260 | 16     | 0.9  | 843.9211  | 2 | 29.97 | 12       | F12:1427 | OB5939 H1 raw.raw | 0               | 0        | 0                   | 557   | 572 | Pyro-glu from Q                     | Q1:Pyro-glu from Q:1000.00                                                                                    | PEAKS PTM |
| total 217 peptides                                            |      |        |           |        |      |           |   |       |          |          |                   |                 |          |                     |       |     |                                     |                                                                                                               |           |

| Peptide                                          | Uniq | -10lgP | Mass      | Length | ppm  | m/z       | z | RT    | Fraction | Scan     | Source File        | Area Raw in gel | #Feature | #Feature Raw in gel | Start | End | PTM                                 | AScore                                                                              | Found By  |
|--------------------------------------------------|------|--------|-----------|--------|------|-----------|---|-------|----------|----------|--------------------|-----------------|----------|---------------------|-------|-----|-------------------------------------|-------------------------------------------------------------------------------------|-----------|
| K.SFN(+.98)LDEGHALRIPSGFISYILNRHDNQNL.R.V        | N    | 46.45  | 3496.7600 | 30     | -3.9 | 700.3566  | 5 | 36.38 | 12       | F12:1849 | OB5939 H1 raw.raw  | 6.986E5         | 1        | 1                   | 255   | 284 |                                     | N3:Deamidation (NQ): 20.27                                                          | PEAKS DB  |
| Q.IEAKPNTLVLPK.H                                 | N    | 46.43  | 1321.7969 | 12     | -4.5 | 661.9028  | 2 | 29.65 | 13       | F13:1449 | OB5940 H1 raw.raw  | 6.8969E5        | 2        | 2                   | 217   | 228 |                                     |                                                                                     | PEAKS DB  |
| T.PGQFEDFFPASSR.D                                | N    | 45.25  | 1483.6731 | 13     | -1.3 | 742.8429  | 2 | 40.34 | 13       | F13:2103 | OB5940 H1 raw.raw  | 4.0298E3        | 1        | 1                   | 295   | 307 |                                     |                                                                                     | PEAKS DB  |
| R.IPSGFISYILN(+.98)RHDNQNL.R.V                   | N    | 45.21  | 2257.1604 | 19     | 9.9  | 753.4015  | 3 | 37.61 | 2        | F2:1698  | OB5925 H3B raw.raw | 2.0603E6        | 2        | 2                   | 266   | 284 |                                     | N11:Deamidation (NQ):33.06                                                          | PEAKS DB  |
| N.NPFYFPSRR.F                                    | N    | 45.02  | 1182.5934 | 9      | 1.6  | 395.2057  | 3 | 28.08 | 13       | F13:1358 | OB5940 H1 raw.raw  | 2.9991E4        | 1        | 1                   | 173   | 181 |                                     |                                                                                     | PEAKS DB  |
| R.DQS(-18.01)SYLQGFSR.N                          | N    | 44.90  | 1268.5785 | 11     | 7.0  | 635.3010  | 2 | 30.87 | 12       | F12:1484 | OB5939 H1 raw.raw  | 0               | 0        | 0                   | 308   | 318 |                                     | S3:Dehydration:33.98                                                                | PEAKS PTM |
| K.GTGNLELVAVRKEQQQR.G                            | N    | 44.58  | 1925.0442 | 17     | 0.6  | 642.6890  | 3 | 25.89 | 14       | F14:1220 | OB5941 H1 raw.raw  | 1.1112E5        | 2        | 2                   | 461   | 477 |                                     |                                                                                     | PEAKS DB  |
| R.EDWRRPSHQQR.K                                  | N    | 43.98  | 1590.7764 | 12     | -0.3 | 398.7012  | 4 | 24.94 | 14       | F14:1169 | OB5941 H1 raw.raw  | 1.0819E4        | 1        | 1                   | 134   | 145 |                                     |                                                                                     | PEAKS DB  |
| R.VLLE(+21.98)ENAGGEQEER.G                       | N    | 42.61  | 1593.7246 | 14     | -0.7 | 797.8690  | 2 | 26.03 | 13       | F13:1239 | OB5940 H1 raw.raw  | 1.373E5         | 3        | 3                   | 335   | 348 |                                     | E4:Sodium adduct:40.00                                                              | PEAKS PTM |
| K.HADADNILVIQ(+.98)QGQATVTVANGNNRK.S             | N    | 42.22  | 2747.3950 | 26     | 5.9  | 916.8110  | 3 | 45.04 | 14       | F14:2357 | OB5941 H1 raw.raw  | 0               | 0        | 0                   | 229   | 254 |                                     | Q11:Deamidation (NQ):9.34                                                           | PEAKS DB  |
| K.HADADNILVIQQGQAT(-18.01)VTVAN(+.98)GNNRK.S     | N    | 41.92  | 2729.3845 | 26     | 0.3  | 683.3536  | 4 | 28.96 | 13       | F13:1411 | OB5940 H1 raw.raw  | 3.5545E5        | 1        | 1                   | 229   | 254 |                                     | T16:Dehydration:8.22; N21:Deamidation (NQ):6.08                                     | PEAKS PTM |
| K.HADADN(+.98)ILVIQQGQATVTVANGNNRK.S             | N    | 41.76  | 2747.3950 | 26     | 3.7  | 916.8090  | 3 | 50.62 | 12       | F12:2616 | OB5939 H1 raw.raw  | 1.1355E5        | 2        | 2                   | 229   | 254 |                                     | N6:Deamidation (NQ):42.57                                                           | PEAKS DB  |
| K.ISMPVN(+.98)TPGQFEDFFPASSR.D                   | N    | 41.75  | 2227.0254 | 20     | 9.3  | 1114.5303 | 2 | 58.23 | 14       | F14:3138 | OB5941 H1 raw.raw  | 2.4983E4        | 1        | 1                   | 288   | 307 |                                     | N6:Deamidation (NQ):42.89                                                           | PEAKS DB  |
| M.LPHFNSK.A                                      | N    | 41.73  | 841.4446  | 7      | -3.4 | 421.7281  | 2 | 30.24 | 14       | F14:1484 | OB5941 H1 raw.raw  | 1.8069E6        | 2        | 2                   | 445   | 451 |                                     |                                                                                     | PEAKS DB  |
| K.PNTLVLPK.H                                     | N    | 41.66  | 880.5382  | 8      | 0.4  | 441.2766  | 2 | 27.53 | 13       | F13:1313 | OB5940 H1 raw.raw  | 8.5249E4        | 1        | 1                   | 221   | 228 |                                     |                                                                                     | PEAKS DB  |
| N.TLEAAFNAEFNEIRR.V                              | N    | 41.51  | 1779.8904 | 15     | -3.0 | 890.9498  | 2 | 32.91 | 14       | F14:1655 | OB5941 H1 raw.raw  | 4.1608E5        | 1        | 1                   | 320   | 334 |                                     |                                                                                     | PEAKS DB  |
| K.KNPQLQ(+.98)DLDMMLTC(+57.02)VEIKEGALMLPHFNSK.A | N    | 40.89  | 3500.7175 | 30     | 0.4  | 1167.9136 | 3 | 36.34 | 13       | F13:1850 | OB5940 H1 raw.raw  | 4.7608E5        | 1        | 1                   | 422   | 451 | Carbamidomethylation                | Q6:Deamidation (NQ): 14.04; C14: Carbamidomethylation:1000.00                       | PEAKS DB  |
| R.NTLEAAFN(+.98)AEFNEIRR.V                       | N    | 40.23  | 1894.9172 | 16     | -0.3 | 948.4656  | 2 | 32.92 | 12       | F12:1570 | OB5939 H1 raw.raw  | 1.5322E6        | 1        | 1                   | 319   | 334 |                                     | N8:Deamidation (NQ): 8.26                                                           | PEAKS DB  |
| R.EGEQEWGT(-18.01)PGSHVR.E                       | N    | 39.67  | 1549.6909 | 14     | -1.7 | 775.8514  | 2 | 27.60 | 14       | F14:1325 | OB5941 H1 raw.raw  | 5.8338E4        | 1        | 1                   | 153   | 166 |                                     | T8:Dehydration:47.09                                                                | PEAKS PTM |
| K.NPQLQLDLM(+15.99)M(+15.99)LTC(+57.02)VEIK.E    | N    | 39.57  | 2078.9688 | 17     | 1.1  | 1040.4928 | 2 | 33.80 | 14       | F14:1701 | OB5941 H1 raw.raw  | 0               | 0        | 0                   | 423   | 439 | Oxidation (M); Carbamidomethylation | M9:Oxidation (M):100.0.00; M10: Oxidation (M):1000.00; C13:Carbamidomethylation:100 | PEAKS DB  |
| total 217 peptides                               |      |        |           |        |      |           |   |       |          |          |                    |                 |          |                     |       |     |                                     |                                                                                     |           |

| Peptide                                         | Uniq | -10lgP | Mass      | Length | ppm  | m/z       | z | RT    | Fraction | Scan     | Source File        | Area Raw in gel | #Feature | #Feature Raw in gel | Start | End | PTM                                           | AScore                                                                  | Found By  |
|-------------------------------------------------|------|--------|-----------|--------|------|-----------|---|-------|----------|----------|--------------------|-----------------|----------|---------------------|-------|-----|-----------------------------------------------|-------------------------------------------------------------------------|-----------|
|                                                 |      |        |           |        |      |           |   |       |          |          |                    |                 |          |                     |       |     |                                               | 0.00                                                                    |           |
| R.IPS(+59.02)GFISYILNR.H                        | N    | 39.40  | 1437.7802 | 12     | 1.5  | 719.8984  | 2 | 36.96 | 12       | F12:1870 | OB5939 H1 raw.raw  | 4.3694E5        | 1        | 1                   | 266   | 277 |                                               | S3:Aminoethylcysteine:49.79                                             | PEAKS PTM |
| K.HADADNILVIQQ(-18.01).G                        | N    | 38.68  | 1317.6677 | 12     | -4.9 | 659.8379  | 2 | 29.56 | 14       | F14:1421 | OB5941 H1 raw.raw  | 1.6968E5        | 2        | 2                   | 229   | 240 | Dehydration                                   | Q12:Dehydration:76.18                                                   | PEAKS PTM |
| R.IVQ(+.98)IEAKPNTLVLPK.H                       | N    | 38.03  | 1662.9919 | 15     | 6.7  | 832.5088  | 2 | 31.45 | 13       | F13:1578 | OB5940 H1 raw.raw  | 2.7795E5        | 1        | 1                   | 214   | 228 |                                               | Q3:Deamidation (NQ):13.11                                               | PEAKS DB  |
| K.AMVIVVVK(-1.03)GTGNLELVAVR.K                  | N    | 37.92  | 2080.1714 | 20     | 4.3  | 1041.0974 | 2 | 33.79 | 13       | F13:1738 | OB5940 H1 raw.raw  | 2.1453E7        | 1        | 1                   | 452   | 471 | Lysine oxidation to amino adipic semialdehyde | K9:Lysine oxidation to amino adipic semialdehyde:1000.00                | PEAKS PTM |
| I.PSGFISYILNRHDNQNL.R                           | N    | 37.07  | 2143.0923 | 18     | 4.0  | 715.3742  | 3 | 33.53 | 12       | F12:1645 | OB5939 H1 raw.raw  | 0               | 0        | 0                   | 267   | 284 |                                               |                                                                         | PEAKS DB  |
| K.EGALM(-48.00)LPHFNSK.A                        | N    | 36.97  | 1294.6670 | 12     | 2.0  | 432.5638  | 3 | 28.31 | 14       | F14:1348 | OB5941 H1 raw.raw  | 1.3683E6        | 1        | 1                   | 440   | 451 | Dethiomethyl                                  | M5:Dethiomethyl:100.00                                                  | PEAKS PTM |
| R.IVQIEAKPN(+15.99)TLVLPK.H                     | N    | 36.93  | 1678.0028 | 15     | -2.8 | 840.0063  | 2 | 29.56 | 14       | F14:1444 | OB5941 H1 raw.raw  | 5.568E5         | 1        | 1                   | 214   | 228 |                                               | N9:Oxidation or Hydroxylation:0.00                                      | PEAKS PTM |
| K.KGSEEGDITNPINLREGEPLSNN(+.98)FGK.L            | Y    | 36.62  | 3059.4319 | 28     | 7.6  | 765.8711  | 4 | 31.46 | 8        | F8:1493  | OB5935 H3B raw.raw | 3.4976E4        | 1        | 1                   | 386   | 413 |                                               | N25:Deamidation (NQ):0.00                                               | PEAKS DB  |
| R.IFLAGDKDNVIDQ(+.98)IEK.Q                      | N    | 36.27  | 1817.9410 | 16     | 7.9  | 606.9924  | 3 | 63.32 | 14       | F14:3434 | OB5941 H1 raw.raw  | 1.3413E4        | 1        | 1                   | 541   | 556 |                                               | Q13:Deamidation (NQ):25.70                                              | PEAKS DB  |
| K.HAD(+57.02)ADNILVIQQGQATVTVANGN(+.98)NRK.S    | N    | 35.92  | 2804.4165 | 26     | -3.8 | 702.1088  | 4 | 28.95 | 13       | F13:1413 | OB5940 H1 raw.raw  | 2.7833E5        | 1        | 1                   | 229   | 254 |                                               | D3:Carbamidomethylation (DHKE, X@N-term):4.64;N23:Deamidation (NQ):0.00 | PEAKS PTM |
| K.NPQ(+.98)LQDLDMMLTC(+57.02)VEIKEGALMLPHFNSK.A | N    | 35.84  | 3372.6226 | 29     | 9.4  | 1125.2253 | 3 | 40.73 | 12       | F12:2064 | OB5939 H1 raw.raw  | 5.6313E5        | 1        | 1                   | 423   | 451 | Carbamidomethylation                          | Q3:Deamidation (NQ):0.00;C13:Carbamidomethylation:1000.00               | PEAKS DB  |
| K.ISM(+15.99)PVNTPGQ(+.98)FEDFFPASSR.D          | N    | 35.67  | 2243.0205 | 20     | 6.2  | 1122.5245 | 2 | 50.73 | 12       | F12:2643 | OB5939 H1 raw.raw  | 0               | 0        | 0                   | 288   | 307 | Oxidation (M)                                 | M3:Oxidation (M):100.00;Q10:Deamidation (NQ):22.37                      | PEAKS DB  |
| K.GT(-18.01)GNLELVAVRK.E                        | N    | 35.64  | 1237.7142 | 12     | 0.9  | 413.5790  | 3 | 26.41 | 13       | F13:1259 | OB5940 H1 raw.raw  | 7.4255E5        | 3        | 3                   | 461   | 472 | Dehydration                                   | T2:Dehydration:1000.00                                                  | PEAKS PTM |
| K.KGSEEGDIT(-18.01)N(+.98)PINLR.E               | N    | 35.42  | 1753.8483 | 16     | 2.8  | 585.6250  | 3 | 28.08 | 13       | F13:1354 | OB5940 H1 raw.raw  | 2.8958E5        | 1        | 1                   | 386   | 401 |                                               | T10:Dehydration:25.86;N11:Deamidation (NQ):32.46                        | PEAKS PTM |
| K.SFNLDEGHALRIPS.G                              | N    | 35.38  | 1554.7791 | 14     | -4.8 | 778.3931  | 2 | 30.79 | 13       | F13:1515 | OB5940 H1 raw.raw  | 5.2113E3        | 1        | 1                   | 255   | 268 |                                               |                                                                         | PEAKS DB  |
| R.DQ(+.98)SSYLQGFSSR.N                          | N    | 34.61  | 1287.5731 | 11     | -3.2 | 644.7917  | 2 | 63.83 | 14       | F14:3449 | OB5941 H1 raw.raw  | 0               | 0        | 0                   | 308   | 318 |                                               | Q2:Deamidation (NQ):41.87                                               | PEAKS DB  |
| R.NN(-17.03)PFYFSSRR.F                          | N    | 34.10  | 1279.6097 | 10     | -0.4 | 427.5437  | 3 | 28.25 | 13       | F13:1369 | OB5940 H1 raw.raw  | 1.47E5          | 1        | 1                   | 172   | 181 |                                               | N2:Ammonia-loss (N):12.28                                               | PEAKS PTM |
| G.SEEEGDITNPINLREGEPLSNNFGK.L                   | Y    | 33.63  | 2873.3315 | 26     | 2.9  | 958.7872  | 3 | 32.34 | 7        | F7:1553  | OB5934 H3B raw.raw | 5.5034E4        | 1        | 1                   | 388   | 413 |                                               |                                                                         | PEAKS DB  |
| total 217 peptides                              |      |        |           |        |      |           |   |       |          |          |                    |                 |          |                     |       |     |                                               |                                                                         |           |

| Peptide                                                              | Uniq | -10lgP | Mass      | Length | ppm  | m/z       | z | RT    | Fraction | Scan     | Source File       | Area Raw in gel | #Feature | #Feature Raw in gel | Start | End | PTM                                    | AScore                                                                                                                                  | Found By  |
|----------------------------------------------------------------------|------|--------|-----------|--------|------|-----------|---|-------|----------|----------|-------------------|-----------------|----------|---------------------|-------|-----|----------------------------------------|-----------------------------------------------------------------------------------------------------------------------------------------|-----------|
| T.G(+214.97)NLELVAVRK.E                                              | N    | 33.47  | 1312.6267 | 10     | 2.3  | 657.3221  | 2 | 27.95 | 14       | F14:1280 | OB5941 H1 raw.raw | 2.4669E5        | 1        | 1                   | 463   | 472 | 4-sulfophenyl isothiocyanate           | G1:4-sulfophenyl isothiocyanate:144.45                                                                                                  | PEAKS PTM |
| R.GRREEEEDEDEEEGSNR.E                                                | Y    | 33.44  | 2192.8689 | 18     | 0.0  | 731.9636  | 3 | 23.70 | 13       | F13:1082 | OB5940 H1 raw.raw | 3.4989E3        | 1        | 1                   | 478   | 495 |                                        |                                                                                                                                         | PEAKS DB  |
| K.HADADNILVIQQ(+.98)GQATVTVANGNN(+.98)RK.S                           | N    | 33.28  | 2748.3792 | 26     | 7.6  | 917.1406  | 3 | 48.20 | 12       | F12:2471 | OB5939 H1 raw.raw | 2.0672E4        | 1        | 1                   | 229   | 254 |                                        | Q12:Deamidation (N Q):23.10;N24:Deamidation (NQ):0.00                                                                                   | PEAKS DB  |
| K.HADAD(-18.01)NILVIQQGQATVTVANGNNRK.S                               | N    | 33.25  | 2728.4004 | 26     | 3.5  | 910.4772  | 3 | 28.70 | 13       | F13:1390 | OB5940 H1 raw.raw | 0               | 0        | 0                   | 229   | 254 |                                        | D5:Dehydration:30.36                                                                                                                    | PEAKS PTM |
| K.ISM(+15.99)PVN(+.98)TPGQFEDFFPASSR.D                               | N    | 33.05  | 2243.0205 | 20     | 7.6  | 1122.5260 | 2 | 49.72 | 13       | F13:2625 | OB5940 H1 raw.raw | 0               | 0        | 0                   | 288   | 307 | Oxidation (M)                          | M3:Oxidation (M):1000.00;N6:Deamidation (NQ):25.70                                                                                      | PEAKS DB  |
| R.IFLAGDK(+26.02)DNVIDQIEK.Q                                         | N    | 32.97  | 1842.9727 | 16     | -0.2 | 922.4934  | 2 | 35.63 | 14       | F14:1844 | OB5941 H1 raw.raw | 1.4466E5        | 1        | 1                   | 541   | 556 | Acetaldehyde +26                       | K7:Acetaldehyde +26:74.34                                                                                                               | PEAKS PTM |
| K.NPQLQ(+.98)DLDMM(+15.99)LTC(+57.02)VEIK.E                          | N    | 32.85  | 2063.9578 | 17     | -3.4 | 1032.9827 | 2 | 37.19 | 12       | F12:1881 | OB5939 H1 raw.raw | 2.2954E4        | 1        | 1                   | 423   | 439 | Carbamidomethylation                   | Q5:Deamidation (NQ):26.31;M10:Oxidation (M):0.00;C13:Carbamidomethylation:1000.00                                                       | PEAKS DB  |
| K.HADADNILVIQ(+.98)QGQ(+.98)ATVTVANGNNRK.S                           | N    | 32.62  | 2748.3792 | 26     | 3.1  | 917.1365  | 3 | 57.24 | 13       | F13:3064 | OB5940 H1 raw.raw | 0               | 0        | 0                   | 229   | 254 |                                        | Q11:Deamidation (N Q):0.00;Q14:Deamidation (NQ):0.00                                                                                    | PEAKS DB  |
| K.N(+.98)PQ(+.98)LQ(+.98)DLDMM(+15.99)LTC(+57.02)VEIKEGALMLPHFNSK.A  | N    | 32.23  | 3390.5854 | 29     | 3.7  | 848.6568  | 4 | 38.47 | 14       | F14:1982 | OB5941 H1 raw.raw | 0               | 0        | 0                   | 423   | 451 | Deamidation (NQ); Carbamidomethylation | N1:Deamidation (NQ):62.42;Q3:Deamidation (NQ):65.92;Q5:Deamidation (N Q):60.92;M10:Oxidation (M):12.28;C13:Carbamidomethylation:1000.00 | PEAKS DB  |
| K.KN(+.98)PQ(+.98)LQ(+.98)DLDM(+15.99)MLTC(+57.02)VEIKEGALMLPHFNSK.A | N    | 31.81  | 3518.6804 | 30     | -3.0 | 880.6747  | 4 | 37.45 | 12       | F12:1882 | OB5939 H1 raw.raw | 0               | 0        | 0                   | 422   | 451 | Deamidation (NQ); Carbamidomethylation | N2:Deamidation (NQ):58.75;Q4:Deamidation (NQ):61.65;Q6:Deamidation (N Q):53.75;M10:Oxidation (M):0.00;C14:Carbamidomethylation:1000.00  | PEAKS DB  |
| total 217 peptides                                                   |      |        |           |        |      |           |   |       |          |          |                   |                 |          |                     |       |     |                                        |                                                                                                                                         |           |

Q6PSU6|Q6PSU6\_ARAHY

[back to list](#)[| Protein Coverage](#) | [Supporting Peptides](#) |

Protein Coverage:

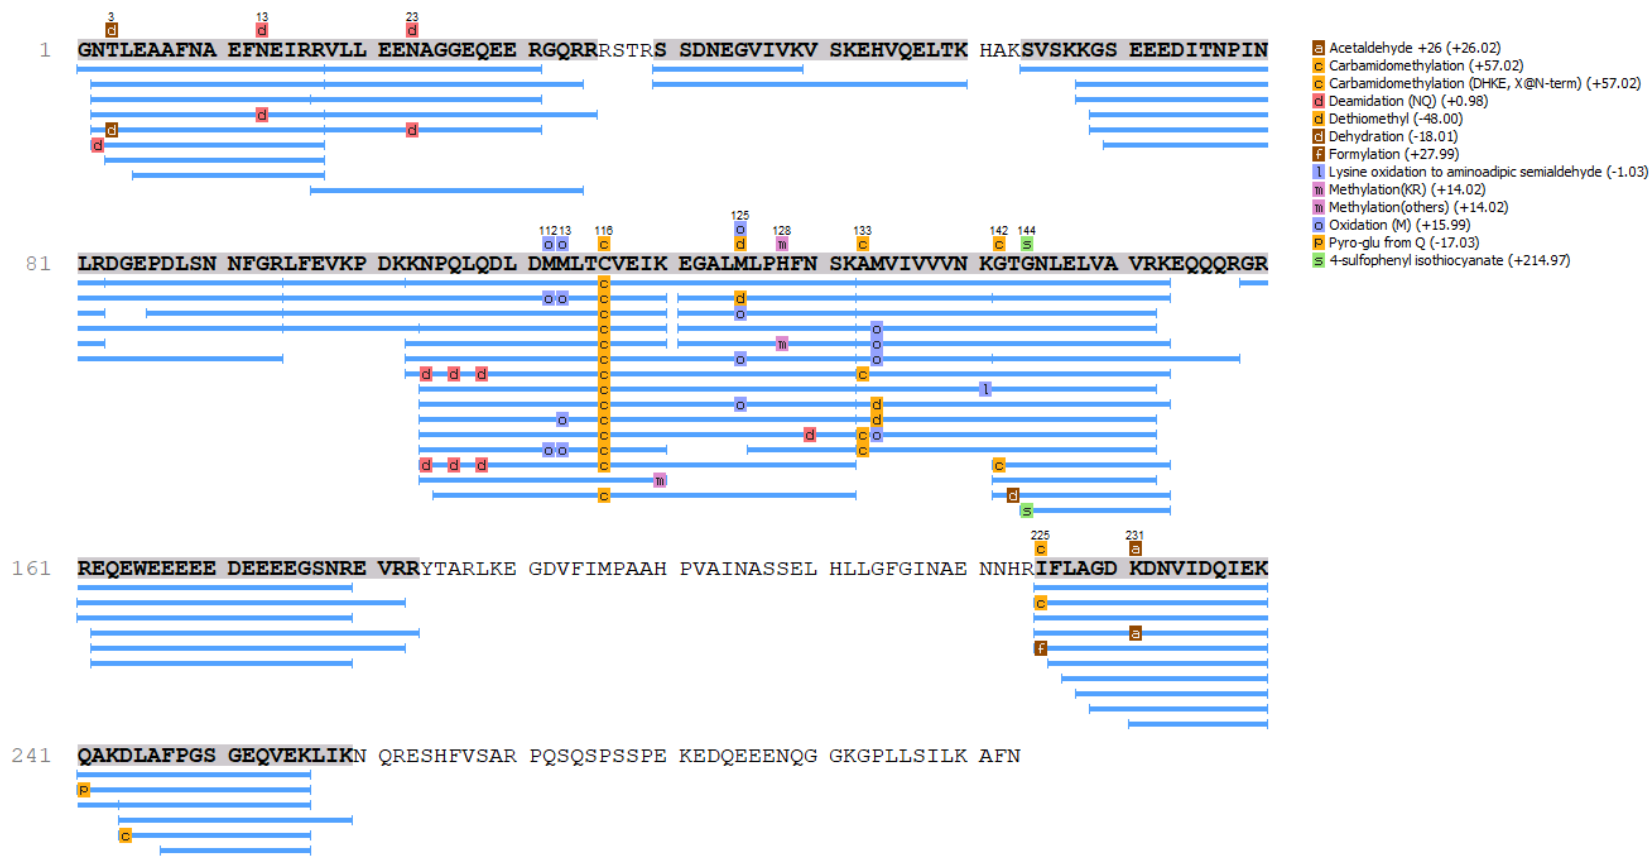

Supporting Peptides:

| Peptide                               | Uniq | -10lgP | Mass      | Length | ppm  | m/z       | z | RT    | Fraction | Scan     | Source File       | Area Raw in gel | #Feature | #Feature Raw in gel | Start | End | PTM                  | AScore                                                  | Found By |
|---------------------------------------|------|--------|-----------|--------|------|-----------|---|-------|----------|----------|-------------------|-----------------|----------|---------------------|-------|-----|----------------------|---------------------------------------------------------|----------|
| K.KNPQLQDLDMMLTC(+57.02)VEIK.E        | N    | 137.14 | 2175.0737 | 18     | 2.4  | 1088.5468 | 2 | 34.90 | 14       | F14:1774 | OB5941 H1 raw.raw | 4.1086E6        | 3        | 3                   | 103   | 120 | Carbamidomethylation | C14:Carbamidomethylation:1000.00                        | PEAKS DB |
| K.NPQLQDLDMMLTC(+57.02)VEIK.E         | N    | 131.65 | 2046.9788 | 17     | -0.8 | 1024.4958 | 2 | 36.89 | 14       | F14:1903 | OB5941 H1 raw.raw | 1.2559E7        | 8        | 8                   | 104   | 120 | Carbamidomethylation | C13:Carbamidomethylation:1000.00                        | PEAKS DB |
| R.EQEWEEEEEEEEEGSNR.E                 | N    | 130.87 | 2280.8413 | 18     | 4.3  | 1141.4329 | 2 | 28.13 | 14       | F14:1352 | OB5941 H1 raw.raw | 4.0373E6        | 3        | 3                   | 162   | 179 |                      |                                                         | PEAKS DB |
| K.NPQLQDLDM(+15.99)MLTC(+57.02)VEIK.E | N    | 128.59 | 2062.9736 | 17     | -6.6 | 1032.4873 | 2 | 36.34 | 14       | F14:1860 | OB5941 H1 raw.raw | 2.4371E5        | 2        | 2                   | 104   | 120 | Carbamidomethylation | M9:Oxidation (M):30.46;C13:Carbamidomethylation:1000.00 | PEAKS DB |
| G.NTLEAAFNAEFNEIR.R                   | N    | 126.11 | 1737.8322 | 15     | 3.3  | 869.9262  | 2 | 35.27 | 14       | F14:1792 | OB5941 H1 raw.raw | 1.3691E7        | 6        | 6                   | 2     | 16  |                      |                                                         | PEAKS DB |
| R.VLLEENAGGEQEER.G                    | N    | 114.70 | 1571.7427 | 14     | 1.1  | 786.8795  | 2 | 26.65 | 14       | F14:1250 | OB5941 H1 raw.raw | 1.2337E7        | 7        | 7                   | 18    | 31  |                      |                                                         | PEAKS DB |
| total 123 peptides                    |      |        |           |        |      |           |   |       |          |          |                   |                 |          |                     |       |     |                      |                                                         |          |

| Peptide                                           | Uniq | -10lgP | Mass      | Length | ppm  | m/z       | z | RT    | Fraction | Scan     | Source File        | Area Raw in gel | #Feature | #Feature Raw in gel | Start | End | PTM                                   | AScore                                                  | Found By  |
|---------------------------------------------------|------|--------|-----------|--------|------|-----------|---|-------|----------|----------|--------------------|-----------------|----------|---------------------|-------|-----|---------------------------------------|---------------------------------------------------------|-----------|
| R.IFLAGDKDNVIDQIEKQAK.D                           | N    | 113.07 | 2144.1477 | 19     | 1.1  | 715.7240  | 3 | 32.93 | 7        | F7:1578  | OB5934 H3B raw.raw | 5.566E7         | 12       | 12                  | 225   | 243 |                                       |                                                         | PEAKS DB  |
| K.AMVIVVNVNKG TGNLELVAVR.K                        | N    | 112.17 | 2081.2031 | 20     | 1.5  | 694.7427  | 3 | 34.35 | 14       | F14:1739 | OB5941 H1 raw.raw  | 7.0931E7        | 12       | 12                  | 133   | 152 |                                       |                                                         | PEAKS DB  |
| K.KGSEEDITNPINLR.D                                | N    | 110.67 | 1713.8533 | 15     | 3.2  | 857.9366  | 2 | 28.85 | 14       | F14:1395 | OB5941 H1 raw.raw  | 1.2495E7        | 8        | 8                   | 68    | 82  |                                       |                                                         | PEAKS DB  |
| K.NPQLQDLDMMLTC(+57.02)VEIKEGALMLPHFNSK.A         | N    | 110.02 | 3371.6387 | 29     | -0.1 | 1686.8264 | 2 | 37.85 | 14       | F14:1946 | OB5941 H1 raw.raw  | 1.7936E8        | 14       | 14                  | 104   | 132 | Carbamidomethylation                  | C13:Carbamidomethylation:1000.00                        | PEAKS DB  |
| K.AMVIVVNVNKG TGNLELVAVR.E                        | N    | 109.98 | 2209.2981 | 21     | -1.4 | 1105.6548 | 2 | 32.55 | 14       | F14:1615 | OB5941 H1 raw.raw  | 2.9136E8        | 18       | 18                  | 133   | 153 |                                       |                                                         | PEAKS DB  |
| K.AM(+15.99)VIVVNVNKG TGNLELVAVR.K                | N    | 109.59 | 2097.1980 | 20     | -2.2 | 1049.6040 | 2 | 32.73 | 14       | F14:1638 | OB5941 H1 raw.raw  | 3.1537E7        | 10       | 10                  | 133   | 152 | Oxidation (M)                         | M2:Oxidation (M):1000.00                                | PEAKS DB  |
| R.IFLAGDKDNVIDQIEK.Q                              | N    | 108.13 | 1816.9570 | 16     | 0.2  | 909.4860  | 2 | 33.10 | 14       | F14:1683 | OB5941 H1 raw.raw  | 7.2865E8        | 41       | 41                  | 225   | 240 |                                       |                                                         | PEAKS DB  |
| K.GSEEDITNPINLRDGEPLDSNNFGR.L                     | N    | 107.18 | 2887.3220 | 26     | -1.7 | 963.4464  | 3 | 32.55 | 14       | F14:1626 | OB5941 H1 raw.raw  | 4.5198E7        | 9        | 9                   | 69    | 94  |                                       |                                                         | PEAKS DB  |
| R.VLLEENAGGEQEERQR.R                              | N    | 104.46 | 1912.9238 | 17     | 1.8  | 957.4709  | 2 | 25.31 | 14       | F14:1182 | OB5941 H1 raw.raw  | 1.9161E6        | 8        | 8                   | 18    | 34  |                                       |                                                         | PEAKS DB  |
| R.I(+57.02)FLAGDKDNVIDQIEK.Q                      | N    | 103.96 | 1873.9785 | 16     | -5.0 | 937.9919  | 2 | 32.19 | 14       | F14:1619 | OB5941 H1 raw.raw  | 4.5184E7        | 7        | 7                   | 225   | 240 | Carbamidomethylation (DHKE, X@N-term) | I1:Carbamidomethylation (DHKE, X@N-term):90.91          | PEAKS PTM |
| R.DGEPLDSNNFGR.L                                  | N    | 102.95 | 1319.5742 | 12     | 0.8  | 660.7949  | 2 | 29.02 | 14       | F14:1398 | OB5941 H1 raw.raw  | 3.2103E6        | 3        | 3                   | 83    | 94  |                                       |                                                         | PEAKS DB  |
| K.QAKDLAFPGSGEQVEK.L                              | N    | 102.73 | 1702.8525 | 16     | 1.8  | 852.4351  | 2 | 26.85 | 14       | F14:1278 | OB5941 H1 raw.raw  | 1.286E6         | 6        | 6                   | 241   | 256 |                                       |                                                         | PEAKS DB  |
| K.DLAFPGSGEQVEK.L                                 | N    | 101.44 | 1375.6619 | 13     | -2.0 | 688.8369  | 2 | 30.08 | 14       | F14:1472 | OB5941 H1 raw.raw  | 6.5563E7        | 9        | 9                   | 244   | 256 |                                       |                                                         | PEAKS DB  |
| K.NPQLQDLDMMLTCVEIK(+14.02).E                     | N    | 101.30 | 2003.9730 | 17     | 2.1  | 1002.9958 | 2 | 38.00 | 14       | F14:1960 | OB5941 H1 raw.raw  | 6.7851E5        | 2        | 2                   | 104   | 120 | Methylation(KR)                       | K17:Methylation(KR):1000.00                             | PEAKS PTM |
| R.RVLLEENAGGEQEER.G                               | N    | 98.06  | 1727.8438 | 15     | 0.4  | 576.9554  | 3 | 24.77 | 13       | F13:1156 | OB5940 H1 raw.raw  | 1.2517E5        | 5        | 5                   | 17    | 31  |                                       |                                                         | PEAKS DB  |
| K.GSEEDITNPINLR.D                                 | N    | 97.01  | 1585.7583 | 14     | 2.4  | 793.8884  | 2 | 30.93 | 14       | F14:1527 | OB5941 H1 raw.raw  | 3.0498E6        | 3        | 3                   | 69    | 82  |                                       |                                                         | PEAKS DB  |
| K.AM(+15.99)VIVVNVNKG TGNLELVAVRK.E               | N    | 96.33  | 2225.2930 | 21     | -0.4 | 1113.6533 | 2 | 30.76 | 14       | F14:1520 | OB5941 H1 raw.raw  | 4.0787E7        | 8        | 7                   | 133   | 153 | Oxidation (M)                         | M2:Oxidation (M):1000.00                                | PEAKS DB  |
| K.KNPQLQDLMM(+15.99)LTC(+57.02)VEIK.E             | N    | 95.01  | 2191.0686 | 18     | -3.4 | 1096.5378 | 2 | 32.73 | 14       | F14:1643 | OB5941 H1 raw.raw  | 1.9787E5        | 1        | 1                   | 103   | 120 | Carbamidomethylation                  | M11:Oxidation (M):9.34;C14:Carbamidomethylation:1000.00 | PEAKS DB  |
| K.NPQLQDLMM(-48.00)LTC(+57.02)VEIK.E              | N    | 93.52  | 1998.9755 | 17     | -2.5 | 1000.4926 | 2 | 32.55 | 14       | F14:1628 | OB5941 H1 raw.raw  | 1.3958E7        | 5        | 5                   | 104   | 120 | Carbamidomethylation                  | M10:Dethiomethyl:27.96;C13:Carbamidomethylation:1000.00 | PEAKS PTM |
| K.NPQLQDLDM(+15.99)MLTC(+57.02)VEIKEGALMLPHFNSK.A | N    | 92.22  | 3387.6335 | 29     | -1.5 | 1130.2168 | 3 | 36.17 | 14       | F14:1926 | OB5941 H1 raw.raw  | 2.8061E7        | 4        | 4                   | 104   | 132 | Carbamidomethylation                  | M9:Oxidation (M):10.11;C13:Carbamidomethylation:1000.00 | PEAKS DB  |
| total 123 peptides                                |      |        |           |        |      |           |   |       |          |          |                    |                 |          |                     |       |     |                                       |                                                         |           |

| Peptide                                            | Uniq | -10lgP | Mass      | Length | ppm  | m/z       | z | RT    | Fraction | Scan     | Source File        | Area Raw in gel | #Feature | #Feature Raw in gel | Start | End | PTM                                   | AScore                                                   | Found By  |
|----------------------------------------------------|------|--------|-----------|--------|------|-----------|---|-------|----------|----------|--------------------|-----------------|----------|---------------------|-------|-----|---------------------------------------|----------------------------------------------------------|-----------|
|                                                    |      |        |           |        |      |           |   |       |          |          |                    |                 |          |                     |       |     |                                       | ylation:1000.00                                          |           |
| K.EGALM(+15.99)LPHFNSK.A                           | N    | 91.98  | 1358.6653 | 12     | 2.1  | 680.3414  | 2 | 29.74 | 14       | F14:1443 | OB5941 H1 raw.raw  | 1.9561E6        | 3        | 3                   | 121   | 132 | Oxidation (M)                         | M5:Oxidation (M):1000.00                                 | PEAKS DB  |
| R.VLLEENAGGEQEERGQRR.R                             | N    | 91.09  | 2069.0249 | 18     | 2.1  | 690.6837  | 3 | 25.31 | 14       | F14:1186 | OB5941 H1 raw.raw  | 1.1888E6        | 3        | 3                   | 18    | 35  |                                       |                                                          | PEAKS DB  |
| R.SSDNEGVIVKVSKEHVQLTK.H                           | N    | 91.01  | 2325.2175 | 21     | 1.3  | 776.0808  | 3 | 28.31 | 14       | F14:1362 | OB5941 H1 raw.raw  | 1.0201E5        | 2        | 2                   | 40    | 60  |                                       |                                                          | PEAKS DB  |
| K.KNPQLQDLDMM(+15.99)LTC(+57.02)VEIKEGALMLPHFNSK.A | N    | 90.76  | 3515.7285 | 30     | -2.7 | 879.9370  | 4 | 34.52 | 13       | F13:1755 | OB5940 H1 raw.raw  | 2.6989E6        | 3        | 3                   | 103   | 132 | Carbamidomethylation                  | M11:Oxidation (M):30.46;C14:Carbamidomethylation:1000.00 | PEAKS DB  |
| K.AM(-48.00)VIVVVNKG TGNLELVAVR.K                  | N    | 90.57  | 2033.1997 | 20     | -3.4 | 1017.6036 | 2 | 31.46 | 14       | F14:1539 | OB5941 H1 raw.raw  | 1.6588E7        | 6        | 6                   | 133   | 152 | Dethiomethyl                          | M2:Dethiomethyl:1000.00                                  | PEAKS PTM |
| K.A(+57.02)MVIVVVNKG TGNLELVAVR.K                  | N    | 90.54  | 2138.2246 | 20     | -0.9 | 1070.1187 | 2 | 34.35 | 14       | F14:1737 | OB5941 H1 raw.raw  | 5.6414E6        | 3        | 3                   | 133   | 152 | Carbamidomethylation (DHKE, X@N-term) | A1:Carbamidomethylation (DHKE, X@N-term):207.56          | PEAKS PTM |
| K.NPQLQDLDMMLTC(+57.02)VEIKEGALM(+15.99)LPHFNSK.A  | N    | 90.37  | 3387.6335 | 29     | -1.5 | 1130.2168 | 3 | 36.17 | 14       | F14:1895 | OB5941 H1 raw.raw  | 3.1109E7        | 7        | 7                   | 104   | 132 | Carbamidomethylation; Oxidation (M)   | C13:Carbamidomethylation:1000.00;M22:Oxidation (M):69.89 | PEAKS DB  |
| K.KGSEEDITNPINLRDGEPLSNNGFR.L                      | N    | 89.87  | 3015.4170 | 27     | -4.2 | 1006.1421 | 3 | 31.29 | 14       | F14:1549 | OB5941 H1 raw.raw  | 7.6E7           | 16       | 16                  | 68    | 94  |                                       |                                                          | PEAKS DB  |
| F.LAGDKDNVIDQIEK.Q                                 | N    | 89.22  | 1556.8046 | 14     | -3.2 | 779.4071  | 2 | 32.19 | 12       | F12:1557 | OB5939 H1 raw.raw  | 4.4864E6        | 2        | 2                   | 227   | 240 |                                       |                                                          | PEAKS DB  |
| K.DLAFPGSGEQVEKLIK.N                               | N    | 87.96  | 1729.9249 | 16     | 1.0  | 865.9706  | 2 | 33.30 | 7        | F7:1601  | OB5934 H3B raw.raw | 6.2551E5        | 3        | 3                   | 244   | 259 |                                       |                                                          | PEAKS DB  |
| K.EGALMLPHFNSK.A                                   | N    | 87.95  | 1342.6703 | 12     | 2.5  | 672.3441  | 2 | 29.83 | 13       | F13:1462 | OB5940 H1 raw.raw  | 9.3502E6        | 3        | 3                   | 121   | 132 |                                       |                                                          | PEAKS DB  |
| K.AMVIVVVNK.G                                      | N    | 86.97  | 971.5837  | 9      | 0.9  | 486.7996  | 2 | 29.88 | 12       | F12:1441 | OB5939 H1 raw.raw  | 9.5124E6        | 3        | 3                   | 133   | 141 |                                       |                                                          | PEAKS DB  |
| K.GTGNLELVAVR.K                                    | N    | 86.65  | 1127.6299 | 11     | -0.8 | 564.8218  | 2 | 29.74 | 14       | F14:1450 | OB5941 H1 raw.raw  | 1.0907E7        | 6        | 6                   | 142   | 152 |                                       |                                                          | PEAKS DB  |
| G.NTLEAAFAEFNEIRR.V                                | N    | 86.03  | 1893.9332 | 16     | -3.6 | 947.9705  | 2 | 35.28 | 12       | F12:1741 | OB5939 H1 raw.raw  | 3.4229E8        | 38       | 38                  | 2     | 17  |                                       |                                                          | PEAKS DB  |
| R.I(+27.99)FLAGDKDNVIDQIEK.Q                       | N    | 85.41  | 1844.9519 | 16     | 5.2  | 923.4880  | 2 | 36.16 | 14       | F14:1844 | OB5941 H1 raw.raw  | 0               | 0        | 0                   | 225   | 240 | Formylation                           | I1:Formylation:77.93                                     | PEAKS PTM |
| GNTLEAAFAEFNEIRR.V                                 | Y    | 83.08  | 1950.9547 | 17     | 6.6  | 976.4910  | 2 | 34.72 | 14       | F14:1759 | OB5941 H1 raw.raw  | 5.0531E6        | 3        | 3                   | 1     | 17  |                                       |                                                          | PEAKS DB  |
| K.KNPQLQDLDM(+15.99)MLTC(+57.02)VEIK.E             | N    | 81.54  | 2191.0686 | 18     | 0.7  | 1096.5424 | 2 | 33.03 | 12       | F12:1615 | OB5939 H1 raw.raw  | 0               | 0        | 0                   | 103   | 120 | Carbamidomethylation                  | M10:Oxidation (M):14.02;C14:Carbamidomethylation:1000.00 | PEAKS DB  |
| K.KNPQLQDLDMMLTC(+57.02)VEIKEGALMLPHFNSK.A         | N    | 81.26  | 3499.7336 | 30     | -0.1 | 875.9406  | 4 | 36.52 | 14       | F14:1868 | OB5941 H1 raw.raw  | 1.091E7         | 3        | 3                   | 103   | 132 | Carbamidomethylation                  | C14:Carbamidomethylation:1000.00                         | PEAKS DB  |
| total 123 peptides                                 |      |        |           |        |      |           |   |       |          |          |                    |                 |          |                     |       |     |                                       |                                                          |           |

| Peptide                                            | Uniq | -10lgP | Mass      | Length | ppm  | m/z       | z | RT    | Fraction | Scan     | Source File       | Area Raw in gel | #Feature | #Feature Raw in gel | Start | End | PTM                                   | AScore                                                   | Found By  |
|----------------------------------------------------|------|--------|-----------|--------|------|-----------|---|-------|----------|----------|-------------------|-----------------|----------|---------------------|-------|-----|---------------------------------------|----------------------------------------------------------|-----------|
| K.GTGNLELVAVRK.E                                   | N    | 79.30  | 1255.7249 | 12     | 0.9  | 628.8702  | 2 | 26.85 | 14       | F14:1263 | OB5941 H1 raw.raw | 1.0437E7        | 9        | 9                   | 142   | 153 |                                       |                                                          | PEAKS DB  |
| R.GRREQEWEEEEDEEEGSNR.E                            | N    | 79.15  | 2650.0649 | 21     | 0.3  | 884.3625  | 3 | 25.64 | 13       | F13:1205 | OB5940 H1 raw.raw | 2.2346E6        | 7        | 7                   | 159   | 179 |                                       |                                                          | PEAKS DB  |
| E.PDLSNNFGR.L                                      | N    | 78.38  | 1018.4832 | 9      | -0.1 | 510.2488  | 2 | 31.24 | 14       | F14:1545 | OB5941 H1 raw.raw | 3.5959E6        | 3        | 3                   | 86    | 94  |                                       |                                                          | PEAKS DB  |
| R.IFLAGDKDNVIDQIE(+57.02)K.Q                       | N    | 78.23  | 1873.9785 | 16     | -5.0 | 937.9919  | 2 | 32.19 | 14       | F14:1583 | OB5941 H1 raw.raw | 3.036E7         | 3        | 3                   | 225   | 240 |                                       | E15:Carbamidomethylation (DHKE, X@N-term):0.00           | PEAKS PTM |
| I.FLAGDKDNVIDQIEK.Q                                | N    | 77.74  | 1703.8729 | 15     | -9.3 | 852.9358  | 2 | 32.01 | 14       | F14:1599 | OB5941 H1 raw.raw | 1.3574E6        | 3        | 3                   | 226   | 240 |                                       |                                                          | PEAKS DB  |
| K.D(+57.02)LAPFGSGEQVEK.L                          | N    | 77.21  | 1432.6833 | 13     | 3.8  | 717.3517  | 2 | 30.92 | 12       | F12:1485 | OB5939 H1 raw.raw | 2.816E5         | 1        | 1                   | 244   | 256 | Carbamidomethylation (DHKE, X@N-term) | D1:Carbamidomethylation (DHKE, X@N-term):93.18           | PEAKS PTM |
| R.SSDNEGIVK.V                                      | N    | 76.72  | 1046.5244 | 10     | 0.3  | 524.2697  | 2 | 22.95 | 13       | F13:1057 | OB5940 H1 raw.raw | 2.6758E5        | 6        | 6                   | 40    | 49  |                                       |                                                          | PEAKS DB  |
| G.NTLEAAFAEFN(+.98)EIRR.V                          | N    | 74.39  | 1894.9172 | 16     | -3.7 | 948.4624  | 2 | 32.73 | 14       | F14:1640 | OB5941 H1 raw.raw | 4.113E6         | 3        | 3                   | 2     | 17  | Deamidation (NQ)                      | N12:Deamidation (NQ):55.21                               | PEAKS DB  |
| R.LFEVKPKKPNQLQDLDMMLTC(+57.02)VEIK.E              | N    | 73.38  | 3131.6069 | 26     | 3.7  | 1044.8801 | 3 | 33.97 | 13       | F13:1716 | OB5940 H1 raw.raw | 3.7487E6        | 3        | 3                   | 95    | 120 | Carbamidomethylation                  | C22:Carbamidomethylation:1000.00                         | PEAKS DB  |
| K.NPQLQDLDMM(+15.99)LTC(+57.02)VEIKEGALMLPHFNSK.A  | N    | 73.21  | 3387.6335 | 29     | 5.6  | 847.9204  | 4 | 35.82 | 13       | F13:1825 | OB5940 H1 raw.raw | 9.6415E6        | 3        | 3                   | 104   | 132 | Carbamidomethylation                  | M10:Oxidation (M):16.90;C13:Carbamidomethylation:1000.00 | PEAKS DB  |
| A.GDKDNVIDQIEK.Q                                   | N    | 73.04  | 1372.6833 | 12     | -2.8 | 687.3470  | 2 | 32.19 | 12       | F12:1561 | OB5939 H1 raw.raw | 1.4449E6        | 3        | 3                   | 229   | 240 |                                       |                                                          | PEAKS DB  |
| R.V(+57.02)LLEENAGGEQEER.G                         | N    | 73.00  | 1628.7642 | 14     | 1.1  | 815.3903  | 2 | 27.03 | 14       | F14:1288 | OB5941 H1 raw.raw | 2.7852E5        | 3        | 3                   | 18    | 31  |                                       | V1:Carbamidomethylation (DHKE, X@N-term):44.44           | PEAKS PTM |
| R.VLLEEN(+.98)AGGEQEER.G                           | N    | 71.59  | 1572.7267 | 14     | -3.7 | 787.3677  | 2 | 26.82 | 13       | F13:1276 | OB5940 H1 raw.raw | 0               | 0        | 0                   | 18    | 31  | Deamidation (NQ)                      | N6:Deamidation (NQ):71.64                                | PEAKS DB  |
| A.FPGSGEQVEK.L                                     | N    | 71.45  | 1076.5138 | 10     | 5.5  | 539.2672  | 2 | 30.23 | 12       | F12:1449 | OB5939 H1 raw.raw | 6.1112E4        | 1        | 1                   | 247   | 256 |                                       |                                                          | PEAKS DB  |
| K.A(+57.02)MVIVVVKGTGNLELVAVRK.E                   | N    | 70.77  | 2266.3196 | 21     | -1.6 | 1134.1653 | 2 | 32.33 | 13       | F13:1602 | OB5940 H1 raw.raw | 4.861E7         | 6        | 6                   | 133   | 153 | Carbamidomethylation (DHKE, X@N-term) | A1:Carbamidomethylation (DHKE, X@N-term):161.20          | PEAKS PTM |
| K.AM(+15.99)VIVVVK.G                               | N    | 70.64  | 987.5787  | 9      | 0.7  | 494.7969  | 2 | 26.66 | 14       | F14:1257 | OB5941 H1 raw.raw | 8.6431E5        | 3        | 3                   | 133   | 141 | Oxidation (M)                         | M2:Oxidation (M):1000.00                                 | PEAKS DB  |
| K.KNPQLQDLDMMLTC(+57.02)VEIKEGALM(+15.99)LPHFNSK.A | N    | 70.55  | 3515.7285 | 30     | -0.8 | 879.9387  | 4 | 35.84 | 12       | F12:1790 | OB5939 H1 raw.raw | 4.7958E6        | 2        | 2                   | 103   | 132 | Carbamidomethylation; Oxidation (M)   | C14:Carbamidomethylation:1000.00;M23:Oxidation (M):69.38 | PEAKS DB  |
| K.SVSKKGSEEDITNPINLR.D                             | N    | 69.76  | 2115.0808 | 19     | 2.6  | 706.0361  | 3 | 27.22 | 14       | F14:1299 | OB5941 H1 raw.raw | 5.5052E4        | 1        | 1                   | 64    | 82  |                                       |                                                          | PEAKS DB  |
| total 123 peptides                                 |      |        |           |        |      |           |   |       |          |          |                   |                 |          |                     |       |     |                                       |                                                          |           |



| Peptide                                                   | Uniq | -10lgP | Mass      | Length | ppm  | m/z       | z | RT    | Fraction | Scan     | Source File        | Area Raw in gel | #Feature | #Feature Raw in gel | Start | End | PTM                                                  | AScore                                                                                 | Found By  |
|-----------------------------------------------------------|------|--------|-----------|--------|------|-----------|---|-------|----------|----------|--------------------|-----------------|----------|---------------------|-------|-----|------------------------------------------------------|----------------------------------------------------------------------------------------|-----------|
| G.NT(-18.01)LEAAFNAEFNEIRR.V                              | N    | 68.32  | 1875.9227 | 16     | -3.2 | 626.3129  | 3 | 33.81 | 14       | F14:1704 | OB5941 H1 raw.raw  | 1.3248E7        | 3        | 3                   | 2     | 17  | Dehydration                                          | T2:Dehydration:1000.00                                                                 | PEAKS PTM |
| G.SEEEDITNPINLRDGEPLDLSNNFGR.L                            | N    | 67.86  | 2830.3005 | 25     | 1.2  | 944.4419  | 3 | 32.96 | 8        | F8:1576  | OB5935 H3B raw.raw | 5.6172E5        | 3        | 3                   | 70    | 94  |                                                      |                                                                                        | PEAKS DB  |
| R.LFEVKPDKKNPQLQDLDM(+15.99)M(+15.99)LTC(+57.02)VEIK.E    | N    | 67.75  | 3163.5967 | 26     | 2.1  | 791.9081  | 4 | 32.37 | 12       | F12:1585 | OB5939 H1 raw.raw  | 6.2675E5        | 1        | 1                   | 95    | 120 | Oxidation (M); Carbamidomethylation                  | M18:Oxidation (M):100.0.00;M19:Oxidation (M):1000.00;C22:Carbamidomethylation:100.0.00 | PEAKS DB  |
| L.AGDKDNVIDQIEK.Q                                         | N    | 66.85  | 1443.7205 | 13     | -3.1 | 722.8653  | 2 | 32.19 | 12       | F12:1560 | OB5939 H1 raw.raw  | 7.0907E5        | 2        | 2                   | 228   | 240 |                                                      |                                                                                        | PEAKS DB  |
| K.G(+57.02)TGNLELVAVRK.E                                  | N    | 66.68  | 1312.7462 | 12     | -0.7 | 657.3799  | 2 | 26.85 | 14       | F14:1280 | OB5941 H1 raw.raw  | 3.417E5         | 3        | 3                   | 142   | 153 | Carbamidomethylation (DHKE, X@N-term)                | G1:Carbamidomethylation (DHKE, X@N-term):56.51                                         | PEAKS PTM |
| D.KDNVIDQIEK.Q                                            | N    | 66.36  | 1200.6350 | 10     | -0.8 | 601.3243  | 2 | 25.89 | 14       | F14:1225 | OB5941 H1 raw.raw  | 5.8609E4        | 3        | 3                   | 231   | 240 |                                                      |                                                                                        | PEAKS DB  |
| K.NPQLQ(+.98)DLDMMLTC(+57.02)VEIKEGALMLPHFNSK.A           | N    | 66.16  | 3372.6226 | 29     | 5.7  | 1125.2212 | 3 | 37.84 | 13       | F13:1936 | OB5940 H1 raw.raw  | 5.3127E7        | 3        | 3                   | 104   | 132 | Carbamidomethylation                                 | Q5:Deamidation (NQ):32.28;C13:Carbamidomethylation:1000.00                             | PEAKS DB  |
| G.N(+.98)TLEAAFNAEFNEIRR.V                                | N    | 65.61  | 1894.9172 | 16     | 2.2  | 948.4680  | 2 | 35.88 | 12       | F12:1787 | OB5939 H1 raw.raw  | 7.0859E7        | 1        | 1                   | 2     | 17  | Deamidation (NQ)                                     | N1:Deamidation (NQ):61.82                                                              | PEAKS DB  |
| K.KNPQLQDLDM(+15.99)MLTC(+57.02)VEIKEGALMLPHFNSK.A        | N    | 65.47  | 3515.7285 | 30     | -3.1 | 879.9366  | 4 | 35.44 | 13       | F13:1830 | OB5940 H1 raw.raw  | 7.2415E6        | 3        | 3                   | 103   | 132 | Carbamidomethylation                                 | M10:Oxidation (M):11.06;C14:Carbamidomethylation:100.00                                | PEAKS DB  |
| K.NPQLQDLDM(+15.99)MLTC(+57.02)VEIKEGALM(+15.99)LPHFNSK.A | N    | 64.53  | 3403.6284 | 29     | 4.5  | 1135.5552 | 3 | 36.52 | 14       | F14:1873 | OB5941 H1 raw.raw  | 4.3451E6        | 3        | 3                   | 104   | 132 | Carbamidomethylation; Oxidation (M)                  | M9:Oxidation (M):10.11;C13:Carbamidomethylation:100.00;M22:Oxidation (M):53.09         | PEAKS DB  |
| R.LFEVKPDK.K                                              | N    | 63.66  | 974.5436  | 8      | 0.9  | 488.2795  | 2 | 25.40 | 12       | F12:1153 | OB5939 H1 raw.raw  | 6.8606E5        | 7        | 7                   | 95    | 102 |                                                      |                                                                                        | PEAKS DB  |
| R.EQEWEEEEEEEEEGSNREVR.R                                  | N    | 63.32  | 2665.0535 | 21     | 2.4  | 889.3606  | 3 | 27.87 | 12       | F12:1308 | OB5939 H1 raw.raw  | 4.1617E5        | 2        | 2                   | 162   | 182 |                                                      |                                                                                        | PEAKS DB  |
| R.REQEWEEEEEEEEEGSNR.E                                    | N    | 63.17  | 2436.9424 | 19     | 2.8  | 1219.4819 | 2 | 26.47 | 14       | F14:1258 | OB5941 H1 raw.raw  | 2.6135E4        | 2        | 2                   | 161   | 179 |                                                      |                                                                                        | PEAKS DB  |
| K.A(+57.02)M(+15.99)VIVVVKGTGNLELVAVR.K                   | N    | 62.49  | 2154.2195 | 20     | -0.1 | 1078.1169 | 2 | 32.92 | 12       | F12:1614 | OB5939 H1 raw.raw  | 4.5509E5        | 2        | 2                   | 133   | 152 | Carbamidomethylation (DHKE, X@N-term); Oxidation (M) | A1:Carbamidomethylation (DHKE, X@N-term):139.69;M2:Oxidation (M):100.0.00              | PEAKS PTM |
| L.EAAFNAEFNEIRR.V                                         | N    | 62.30  | 1565.7585 | 13     | -4.7 | 783.8829  | 2 | 34.06 | 12       | F12:1677 | OB5939 H1 raw.raw  | 6.1232E5        | 1        | 1                   | 5     | 17  |                                                      |                                                                                        | PEAKS DB  |
| K.N(+.98)PQLQDLDMMLTC(+57.02)VEIKEGALMLPHFNSK.A           | N    | 61.86  | 3372.6226 | 29     | 5.7  | 1125.2212 | 3 | 37.84 | 13       | F13:1983 | OB5940 H1 raw.raw  | 1.2903E7        | 1        | 1                   | 104   | 132 | Carbamidomethylation                                 | N1:Deamidation (NQ):14.04;C13:                                                         | PEAKS DB  |
| total 123 peptides                                        |      |        |           |        |      |           |   |       |          |          |                    |                 |          |                     |       |     |                                                      |                                                                                        |           |

| Peptide                                                       | Uniq | -10lgP | Mass      | Length | ppm  | m/z       | z | RT    | Fraction | Scan     | Source File        | Area Raw in gel | #Feature | #Feature Raw in gel | Start | End | PTM                                    | AScore                                                                             | Found By  |
|---------------------------------------------------------------|------|--------|-----------|--------|------|-----------|---|-------|----------|----------|--------------------|-----------------|----------|---------------------|-------|-----|----------------------------------------|------------------------------------------------------------------------------------|-----------|
|                                                               |      |        |           |        |      |           |   |       |          |          |                    |                 |          |                     |       |     |                                        | Carbamido methylation:1000.00                                                      |           |
| R.IFLAGDKDNVIDQ(+.98)IEKQAK.D                                 | N    | 58.72  | 2145.1316 | 19     | 9.3  | 716.0578  | 3 | 32.93 | 2        | F2:1432  | OB5925 H3B raw.raw | 1.5596E6        | 1        | 1                   | 225   | 243 |                                        | Q13:Deamidation (NQ):0.00                                                          | PEAKS DB  |
| R.LFEVKPKDKNPQLQDLDMM(+15.99)LTC(+57.02)VEIK.E                | N    | 57.62  | 3147.6018 | 26     | -4.4 | 787.9042  | 4 | 32.55 | 14       | F14:1633 | OB5941 H1 raw.raw  | 2.1102E6        | 3        | 3                   | 95    | 120 | Carbamidomethylation                   | M19:Oxidation (M):17.01;C22:Carbamidomethylation:1000.00                           | PEAKS DB  |
| K.AMVIVVVN(+.98)KGTGNLELVAVRK.E                               | N    | 56.84  | 2210.2820 | 21     | 9.6  | 737.7750  | 3 | 33.10 | 14       | F14:1664 | OB5941 H1 raw.raw  | 8.0625E6        | 2        | 2                   | 133   | 153 |                                        | N8:Deamidation (NQ):41.87                                                          | PEAKS DB  |
| K.KNPQLQDLDMM(-48.00)LTC(+57.02)VEIK.E                        | N    | 56.43  | 2127.0703 | 18     | 0.8  | 710.0312  | 3 | 31.11 | 14       | F14:1538 | OB5941 H1 raw.raw  | 3.3192E6        | 2        | 2                   | 103   | 120 | Carbamidomethylation                   | M11:Dethio methyl:14.02;C14:Carbamidomethylation:1000.00                           | PEAKS PTM |
| K.AM(-48.00)VIVVVNKGTTGNLELVAVRK.E                            | N    | 54.93  | 2161.2947 | 21     | 1.4  | 1081.6561 | 2 | 29.80 | 14       | F14:1453 | OB5941 H1 raw.raw  | 1.7581E6        | 2        | 2                   | 133   | 153 | Dethiomethyl                           | M2:Dethio methyl:100.00                                                            | PEAKS PTM |
| K.NPQLQDLDM(+15.99)MLTC(+57.02)VEIKEGALMLPHFN(+.98)SK.A       | N    | 54.06  | 3388.6174 | 29     | 5.0  | 848.1659  | 4 | 36.17 | 14       | F14:1849 | OB5941 H1 raw.raw  | 6.0156E6        | 2        | 2                   | 104   | 132 | Carbamidomethylation; Deamidation (NQ) | M9:Oxidation (M):14.02;C13:Carbamidomethylation:1000.00;N27:Deamidation (NQ):58.23 | PEAKS DB  |
| R.IFLAGDKDNVIDQIE(+57.02)KQAK.D                               | N    | 52.99  | 2201.1692 | 19     | -2.0 | 734.7289  | 3 | 31.83 | 13       | F13:1588 | OB5940 H1 raw.raw  | 3.3379E6        | 2        | 2                   | 225   | 243 |                                        | E15:Carbamidomethylation (DHKE, X@N-term):12.28                                    | PEAKS PTM |
| K.NPQLQDLDMMLTC(+57.02)VEIKEGALMLPHFN(+.98)SK.A               | N    | 52.89  | 3372.6226 | 29     | 7.4  | 844.1691  | 4 | 37.85 | 13       | F13:1914 | OB5940 H1 raw.raw  | 5.2564E7        | 2        | 2                   | 104   | 132 | Carbamidomethylation; Deamidation (NQ) | C13:Carbamidomethylation:1000.00;N27:Deamidation (NQ):61.84                        | PEAKS DB  |
| K.NPQLQDLDM(+15.99)M(+15.99)LTC(+57.02)VEIKEGALMLPHFNSK.A     | N    | 52.70  | 3403.6284 | 29     | -4.3 | 1135.5452 | 3 | 35.63 | 14       | F14:1818 | OB5941 H1 raw.raw  | 1.9434E6        | 2        | 2                   | 104   | 132 | Oxidation (M); Carbamidomethylation    | M9:Oxidation (M):49.75;M10:Oxidation (M):51.99;C13:Carbamidomethylation:1000.00    | PEAKS DB  |
| K.DLAFIGSGEQVEK(+57.02)LIK.N                                  | N    | 52.57  | 1786.9464 | 16     | -3.8 | 894.4771  | 2 | 32.91 | 14       | F14:1654 | OB5941 H1 raw.raw  | 6.7177E5        | 1        | 1                   | 244   | 259 |                                        | K13:Carbamidomethylation (DHKE, X@N-term):27.96                                    | PEAKS PTM |
| K.KN(+.98)PQLQDLDMM(+15.99)LTC(+57.02)VEIK.E                  | N    | 52.31  | 2192.0527 | 18     | 9.2  | 1097.0437 | 2 | 32.33 | 13       | F13:1621 | OB5940 H1 raw.raw  | 8.5775E4        | 1        | 1                   | 103   | 120 | Carbamidomethylation                   | N2:Deamidation (NQ):14.04;M11:Oxidation (M):0.00;C14:Carbamidomethylation:1000.00  | PEAKS DB  |
| K.EGALMLPH(+14.02)FNSK.A                                      | N    | 51.73  | 1356.6860 | 12     | 1.3  | 679.3512  | 2 | 30.49 | 14       | F14:1499 | OB5941 H1 raw.raw  | 2.5741E4        | 1        | 1                   | 121   | 132 | Methylation(others)                    | H8:Methylation(others):53.53                                                       | PEAKS PTM |
| K.N(+.98)PQLQ(+.98)DLDMMLTC(+57.02)VEIKEGALM(+15.99)LPHFNSK.A | N    | 51.60  | 3389.6016 | 29     | 9.0  | 848.4153  | 4 | 36.92 | 12       | F12:1868 | OB5939 H1 raw.raw  | 2.6873E6        | 1        | 1                   | 104   | 132 | Carbamidomethylation                   | N1:Deamidation (NQ):0.00;Q5:Deamidation (NQ):14.04;C13:Carb                        | PEAKS DB  |
| total 123 peptides                                            |      |        |           |        |      |           |   |       |          |          |                    |                 |          |                     |       |     |                                        |                                                                                    |           |

| Peptide                                                       | Uniq | -10lgP | Mass      | Length | ppm  | m/z       | z | RT    | Fraction | Scan     | Source File       | Area Raw in gel | #Feature | #Feature Raw in gel | Start | End | PTM                                 | AScore                                                                                                        | Found By  |
|---------------------------------------------------------------|------|--------|-----------|--------|------|-----------|---|-------|----------|----------|-------------------|-----------------|----------|---------------------|-------|-----|-------------------------------------|---------------------------------------------------------------------------------------------------------------|-----------|
|                                                               |      |        |           |        |      |           |   |       |          |          |                   |                 |          |                     |       |     |                                     | amidomethylation:100.00;M22:Oxidation (M):18.84                                                               |           |
| R.LFEVKPDKK.N                                                 | N    | 50.85  | 1102.6385 | 9      | 1.1  | 552.3271  | 2 | 24.94 | 14       | F14:1179 | OB5941 H1 raw.raw | 2.3081E5        | 2        | 2                   | 95    | 103 |                                     |                                                                                                               | PEAKS DB  |
| R.RVLEENAGGEQEERGQR.R                                         | N    | 50.67  | 2069.0249 | 18     | 2.1  | 690.6837  | 3 | 24.88 | 13       | F13:1165 | OB5940 H1 raw.raw | 2.7227E5        | 1        | 1                   | 17    | 34  |                                     |                                                                                                               | PEAKS DB  |
| K.N(+.98)PQLQDLDMMLTC(+57.02)VEIKEGALM(+15.99)LPHFNSK.A       | N    | 50.17  | 3388.6174 | 29     | -2.4 | 1130.5437 | 3 | 36.35 | 13       | F13:1874 | OB5940 H1 raw.raw | 8.9006E5        | 1        | 1                   | 104   | 132 | Carbamidomethylation; Oxidation (M) | N1:Deamidation (NQ): 0.00;C13:Carbamidomethylation: 1000.00;M22:Oxidation (M):54.40                           | PEAKS DB  |
| K.NPQLQDLDMM(+15.99)LTC(+57.02)VEIKEGALM(+15.99)LPHFNSK.A     | N    | 48.97  | 3403.6284 | 29     | 2.7  | 1135.5531 | 3 | 35.09 | 14       | F14:1786 | OB5941 H1 raw.raw | 3.2001E5        | 1        | 1                   | 104   | 132 | Carbamidomethylation                | M10:Oxidation (M):12.28;C13:Carbamidomethylation:1000.00;M22:Oxidation (M):28.29                              | PEAKS DB  |
| R.EQEWEEEEEEEEGSNREVRR.Y                                      | N    | 48.85  | 2821.1545 | 22     | 1.8  | 941.3939  | 3 | 26.75 | 12       | F12:1227 | OB5939 H1 raw.raw | 3.3887E6        | 3        | 3                   | 162   | 183 |                                     |                                                                                                               | PEAKS DB  |
| K.KN(+.98)PQLQDLDMMLTC(+57.02)VEIKEGALMLPHFNSK.A              | N    | 48.84  | 3500.7175 | 30     | 7.1  | 876.1929  | 4 | 36.26 | 13       | F13:1847 | OB5940 H1 raw.raw | 2.2113E6        | 1        | 1                   | 103   | 132 | Carbamidomethylation                | N2:Deamidation (NQ): 0.00;C14:Carbamidomethylation: 1000.00                                                   | PEAKS DB  |
| R.IFLAGDKDNVIDQIEK(+57.02)QAK.D                               | N    | 48.82  | 2201.1692 | 19     | 2.7  | 734.7323  | 3 | 32.55 | 12       | F12:1581 | OB5939 H1 raw.raw | 3.2958E6        | 1        | 1                   | 225   | 243 |                                     | K16:Carbamidomethylation (DHKE, X@N-term):15.91                                                               | PEAKS PTM |
| R.LFEVKPDKKN(+.98)PQLQDLDMMLTC(+57.02)VEIK.E                  | N    | 47.32  | 3132.5908 | 26     | 9.3  | 1567.3173 | 2 | 34.35 | 14       | F14:1745 | OB5941 H1 raw.raw | 1.9315E5        | 1        | 1                   | 95    | 120 | Carbamidomethylation                | N10:Deamidation (NQ):14.04;C22:Carbamidomethylation:1000.00                                                   | PEAKS DB  |
| K.N(+.98)PQ(+.98)LQDLDMMLTC(+57.02)VEIKEGALM(+15.99)LPHFNSK.A | N    | 46.82  | 3389.6016 | 29     | 9.0  | 848.4153  | 4 | 36.92 | 12       | F12:1851 | OB5939 H1 raw.raw | 7.3613E6        | 2        | 2                   | 104   | 132 | Carbamidomethylation                | N1:Deamidation (NQ): 11.12;Q3:Deamidation (NQ):0.00;C13:Carbamidomethylation:1000.00;M22:Oxidation (M): 24.93 | PEAKS DB  |
| N.PQLQDLDMMLTC(+57.02)VEIKEGALMLPHFNSK.A                      | N    | 46.63  | 3257.5957 | 28     | 0.9  | 815.4069  | 4 | 37.83 | 14       | F14:1952 | OB5941 H1 raw.raw | 2.3692E5        | 1        | 1                   | 105   | 132 | Carbamidomethylation                | C12:Carbamidomethylation:1000.00                                                                              | PEAKS DB  |
| K.Q(-17.03)AKDLAFPGSGEQVEK.L                                  | N    | 46.49  | 1685.8260 | 16     | 0.9  | 843.9211  | 2 | 29.97 | 12       | F12:1427 | OB5939 H1 raw.raw | 0               | 0        | 0                   | 241   | 256 | Pyro-glu from Q                     | Q1:Pyro-glu from Q:1000.00                                                                                    | PEAKS PTM |
| R.REQ(+.98)EWEEEEEEEEGSNR.E                                   | N    | 45.55  | 2437.9265 | 19     | 7.6  | 813.6556  | 3 | 26.55 | 12       | F12:1226 | OB5939 H1 raw.raw | 4.2319E4        | 1        | 1                   | 161   | 179 |                                     | Q3:Deamidation (NQ): 42.90                                                                                    | PEAKS DB  |
| K.GTGNLELVAVRKEQQQR.G                                         | N    | 44.58  | 1925.0442 | 17     | 0.6  | 642.6890  | 3 | 25.89 | 14       | F14:1220 | OB5941 H1 raw.raw | 1.1112E5        | 2        | 2                   | 142   | 158 |                                     |                                                                                                               | PEAKS DB  |
| total 123 peptides                                            |      |        |           |        |      |           |   |       |          |          |                   |                 |          |                     |       |     |                                     |                                                                                                               |           |

| Peptide                                          | Uniq | -10lgP | Mass      | Length | ppm  | m/z       | z | RT    | Fraction | Scan     | Source File       | Area Raw in gel | #Feature | #Feature Raw in gel | Start | End | PTM                                           | AScore                                                                                | Found By  |
|--------------------------------------------------|------|--------|-----------|--------|------|-----------|---|-------|----------|----------|-------------------|-----------------|----------|---------------------|-------|-----|-----------------------------------------------|---------------------------------------------------------------------------------------|-----------|
| R.VLLE(+21.98)ENAGGEQEER.G                       | N    | 42.61  | 1593.7246 | 14     | -0.7 | 797.8690  | 2 | 26.03 | 13       | F13:1239 | OB5940 H1 raw.raw | 1.373E5         | 3        | 3                   | 18    | 31  |                                               | E4:Sodium adduct:40.00                                                                | PEAKS PTM |
| M.LPHFNSK.A                                      | N    | 41.73  | 841.4446  | 7      | -3.4 | 421.7281  | 2 | 30.24 | 14       | F14:1484 | OB5941 H1 raw.raw | 1.8069E6        | 2        | 2                   | 126   | 132 |                                               |                                                                                       | PEAKS DB  |
| N.TLEAAFNAEFNEIRR.V                              | N    | 41.51  | 1779.8904 | 15     | -3.0 | 890.9498  | 2 | 32.91 | 14       | F14:1655 | OB5941 H1 raw.raw | 4.1608E5        | 1        | 1                   | 3     | 17  |                                               |                                                                                       | PEAKS DB  |
| K.KGSEEDITN(-17.03)PINLR.D                       | N    | 41.49  | 1696.8268 | 15     | 3.3  | 566.6180  | 3 | 28.85 | 14       | F14:1397 | OB5941 H1 raw.raw | 2.3089E5        | 1        | 1                   | 68    | 82  |                                               | N10:Ammonia-loss (N):40.63                                                            | PEAKS PTM |
| K.KNPQLQ(+.98)DLDMMLTC(+57.02)VEIKEGALMLPHFNSK.A | N    | 40.89  | 3500.7175 | 30     | 0.4  | 1167.9136 | 3 | 36.34 | 13       | F13:1850 | OB5940 H1 raw.raw | 4.7608E5        | 1        | 1                   | 103   | 132 | Carbamidomethylation                          | Q6:Deamidation (NQ): 14.04;C14:Carbamidomethylation:1000.00                           | PEAKS DB  |
| R.REQEWEIEEEEEEGSNREVR.R                         | N    | 40.76  | 2821.1545 | 22     | 3.9  | 941.3958  | 3 | 26.47 | 14       | F14:1247 | OB5941 H1 raw.raw | 1.8468E6        | 1        | 1                   | 161   | 182 |                                               |                                                                                       | PEAKS DB  |
| G.NTLEAFN(+.98)AEFNEIRR.V                        | N    | 40.23  | 1894.9172 | 16     | -0.3 | 948.4656  | 2 | 32.92 | 12       | F12:1570 | OB5939 H1 raw.raw | 1.5322E6        | 1        | 1                   | 2     | 17  |                                               | N8:Deamidation (NQ): 8.26                                                             | PEAKS DB  |
| K.NPQLQLDLM(+15.99)M(+15.99)LTC(+57.02)VEIK.E    | N    | 39.57  | 2078.9688 | 17     | 1.1  | 1040.4928 | 2 | 33.80 | 14       | F14:1701 | OB5941 H1 raw.raw | 0               | 0        | 0                   | 104   | 120 | Oxidation (M); Carbamidomethylation           | M9:Oxidation (M):100.0.00;M10:Oxidation (M):1000.00;C13:Carbamidomethylation:100.0.00 | PEAKS DB  |
| K.AMVIVVVK(-1.03)GTGNLVLAVR.K                    | N    | 37.92  | 2080.1714 | 20     | 4.3  | 1041.0974 | 2 | 33.79 | 13       | F13:1738 | OB5940 H1 raw.raw | 2.1453E7        | 1        | 1                   | 133   | 152 | Lysine oxidation to amino adipic semialdehyde | K9:Lysine oxidation to amino adipic semialdehyde:1000.00                              | PEAKS PTM |
| K.EGALM(-48.00)LPHFNSK.A                         | N    | 36.97  | 1294.6670 | 12     | 2.0  | 432.5638  | 3 | 28.31 | 14       | F14:1348 | OB5941 H1 raw.raw | 1.3683E6        | 1        | 1                   | 121   | 132 | Dethiomethyl                                  | M5:Dethiomethyl:100.0.00                                                              | PEAKS PTM |
| R.IFLAGDKDNVIDQ(+.98)IEK.Q                       | N    | 36.27  | 1817.9410 | 16     | 7.9  | 606.9924  | 3 | 63.32 | 14       | F14:3434 | OB5941 H1 raw.raw | 1.3413E4        | 1        | 1                   | 225   | 240 |                                               | Q13:Deamidation (NQ):25.70                                                            | PEAKS DB  |
| K.NPQ(+.98)LQLDMMLTC(+57.02)VEIKEGALMLPHFNSK.A   | N    | 35.84  | 3372.6226 | 29     | 9.4  | 1125.2253 | 3 | 40.73 | 12       | F12:2064 | OB5939 H1 raw.raw | 5.6313E5        | 1        | 1                   | 104   | 132 | Carbamidomethylation                          | Q3:Deamidation (NQ): 0.00;C13:Carbamidomethylation: 1000.00                           | PEAKS DB  |
| K.GT(-18.01)GNLVLAVRK.E                          | N    | 35.64  | 1237.7142 | 12     | 0.9  | 413.5790  | 3 | 26.41 | 13       | F13:1259 | OB5940 H1 raw.raw | 7.4255E5        | 3        | 3                   | 142   | 153 | Dehydration                                   | T2:Dehydration:1000.00                                                                | PEAKS PTM |
| R.S(+57.02)SDNEGVIVK.V                           | N    | 34.54  | 1103.5459 | 10     | 0.3  | 552.7804  | 2 | 23.19 | 13       | F13:1066 | OB5940 H1 raw.raw | 0               | 0        | 0                   | 40    | 49  |                                               | S1:Carbamidomethylation (DHKE, X@N-term):11.10                                        | PEAKS PTM |
| T.G(+214.97)NLELAVRK.E                           | N    | 33.47  | 1312.6267 | 10     | 2.3  | 657.3221  | 2 | 27.95 | 14       | F14:1280 | OB5941 H1 raw.raw | 2.4669E5        | 1        | 1                   | 144   | 153 | 4-sulfo phenyl isothiocyanate                 | G1:4-sulfo phenyl isothiocyanate:144.45                                               | PEAKS PTM |
| R.IFLAGDK(+26.02)DNVIDQIEK.Q                     | N    | 32.97  | 1842.9727 | 16     | -0.2 | 922.4934  | 2 | 35.63 | 14       | F14:1844 | OB5941 H1 raw.raw | 1.4466E5        | 1        | 1                   | 225   | 240 | Acetaldehyde +26                              | K7:Acetaldehyde +26: 74.34                                                            | PEAKS PTM |
| K.NPQLQ(+.98)DLDM(+15.99)LTC(+57.02)VEIK.E       | N    | 32.85  | 2063.9578 | 17     | -3.4 | 1032.9827 | 2 | 37.19 | 12       | F12:1881 | OB5939 H1 raw.raw | 2.2954E4        | 1        | 1                   | 104   | 120 | Carbamidomethylation                          | Q5:Deamidation (NQ): 26.31;M10:Oxidation (M):0.00;C13:Carbamidomethylation            | PEAKS DB  |
| total 123 peptides                               |      |        |           |        |      |           |   |       |          |          |                   |                 |          |                     |       |     |                                               |                                                                                       |           |

| Peptide                                                              | Uniq | -10lgP | Mass      | Length | ppm  | m/z      | z | RT    | Fraction | Scan     | Source File       | Area Raw in gel | #Feature | #Feature Raw in gel | Start | End | PTM                                    | AScore                                                                                                                                              | Found By |
|----------------------------------------------------------------------|------|--------|-----------|--------|------|----------|---|-------|----------|----------|-------------------|-----------------|----------|---------------------|-------|-----|----------------------------------------|-----------------------------------------------------------------------------------------------------------------------------------------------------|----------|
| K.N(+.98)PQ(+.98)LQ(+.98)DLDMM(+15.99)LTC(+57.02)VEIKEGALMLPHFNSK.A  | N    | 32.23  | 3390.5854 | 29     | 3.7  | 848.6568 | 4 | 38.47 | 14       | F14:1982 | OB5941 H1 raw.raw | 0               | 0        | 0                   | 104   | 132 | Deamidation (NQ); Carbamidomethylation | on:1000.00<br>N1:Deamidation (NQ):62.42;Q3:Deamidation (NQ):65.92;Q5:Deamidation (NQ):60.92;M10:Oxidation (M):12.28;C13:Carbamidomethylation:100.00 | PEAKS DB |
| K.KN(+.98)PQ(+.98)LQ(+.98)DLDM(+15.99)MLTC(+57.02)VEIKEGALMLPHFNSK.A | N    | 31.81  | 3518.6804 | 30     | -3.0 | 880.6747 | 4 | 37.45 | 12       | F12:1882 | OB5939 H1 raw.raw | 0               | 0        | 0                   | 103   | 132 | Deamidation (NQ); Carbamidomethylation | N2:Deamidation (NQ):58.75;Q4:Deamidation (NQ):61.65;Q6:Deamidation (NQ):53.75;M10:Oxidation (M):0.00;C14:Carbamidomethylation:100.00                | PEAKS DB |
| total 123 peptides                                                   |      |        |           |        |      |          |   |       |          |          |                   |                 |          |                     |       |     |                                        |                                                                                                                                                     |          |

A1DZF0|A1DZF0\_ARAHY

back to list

| [Protein Coverage](#) | [Supporting Peptides](#) |

Protein Coverage:

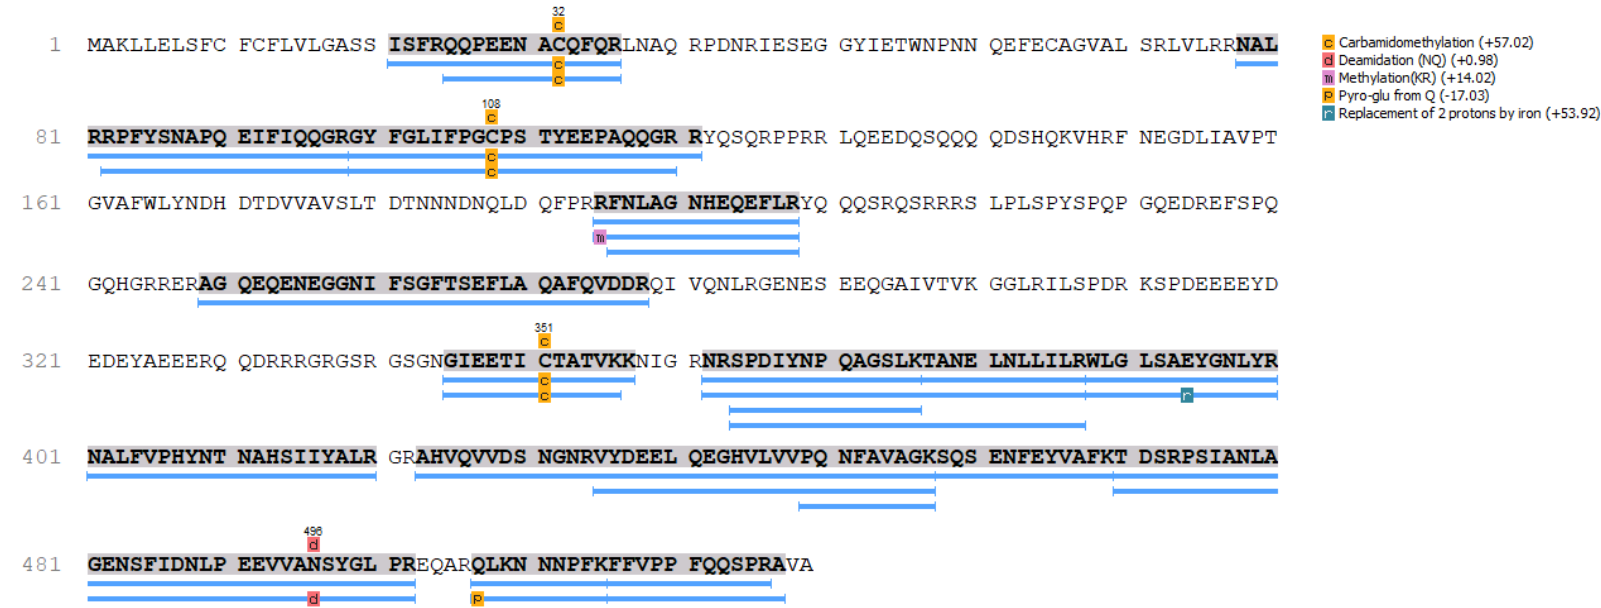

Supporting Peptides:

| Peptide | Uniq | -10lgP | Mass | Length | ppm | m/z | z | RT | Fraction | Scan | Source File | Area Raw in gel | #Feature | #Feature Raw in gel | Start | End | PTM | AScore | Found By |
|---------|------|--------|------|--------|-----|-----|---|----|----------|------|-------------|-----------------|----------|---------------------|-------|-----|-----|--------|----------|
|---------|------|--------|------|--------|-----|-----|---|----|----------|------|-------------|-----------------|----------|---------------------|-------|-----|-----|--------|----------|

| Peptide                                     | Uniq | -10lgP | Mass      | Length | ppm | m/z       | z | RT    | Fraction | Scan     | Source File        | Area Raw in gel | #Feature | #Feature Raw in gel | Start | End | PTM                              | AScore                                                                        | Found By  |
|---------------------------------------------|------|--------|-----------|--------|-----|-----------|---|-------|----------|----------|--------------------|-----------------|----------|---------------------|-------|-----|----------------------------------|-------------------------------------------------------------------------------|-----------|
| R.SPDIYNPQAGSLKTANELNLLILR.W                | N    | 134.89 | 2639.4282 | 24     | 0.9 | 880.8175  | 3 | 35.79 | 5        | F5:1765  | OB5932 H2 raw.raw  | 1.8094E6        | 3        | 3                   | 364   | 387 |                                  |                                                                               | PEAKS DB  |
| R.NALFVPHYNTNAHSIIYALR.G                    | N    | 123.74 | 2313.2019 | 20     | 2.3 | 1157.6108 | 2 | 33.37 | 5        | F5:1607  | OB5932 H2 raw.raw  | 3.0421E7        | 13       | 12                  | 401   | 420 |                                  |                                                                               | PEAKS DB  |
| R.GYGLIFPGC(+57.02)PSTYEPAQQGR.R            | N    | 122.36 | 2473.1372 | 22     | 3.9 | 1237.5807 | 2 | 36.47 | 2        | F2:1635  | OB5925 H3B raw.raw | 6.1209E5        | 7        | 7                   | 99    | 120 | Carbamidomethylation             | C10:Carbamidomethylation:1000.00                                              | PEAKS DB  |
| R.WLGLSAEYGNLYR.N                           | N    | 116.56 | 1540.7673 | 13     | 2.0 | 771.3925  | 2 | 34.87 | 5        | F5:1714  | OB5932 H2 raw.raw  | 3.9701E7        | 18       | 17                  | 388   | 400 |                                  |                                                                               | PEAKS DB  |
| K.TDSRPSIANLAGENSFIDNLPeeVVANSYGLPR.E       | N    | 114.51 | 3544.7434 | 33     | 1.0 | 1182.5896 | 3 | 37.44 | 5        | F5:1890  | OB5932 H2 raw.raw  | 1.1751E8        | 13       | 13                  | 470   | 502 |                                  |                                                                               | PEAKS DB  |
| K.SQSENFYVAFK.T                             | N    | 113.90 | 1447.6619 | 12     | 1.7 | 724.8394  | 2 | 31.69 | 5        | F5:1516  | OB5932 H2 raw.raw  | 1.027E7         | 4        | 4                   | 458   | 469 |                                  |                                                                               | PEAKS DB  |
| R.NRSPDIYNPQAGSLK.T                         | N    | 110.81 | 1658.8376 | 15     | 0.4 | 830.4265  | 2 | 27.80 | 5        | F5:1285  | OB5932 H2 raw.raw  | 8.3597E5        | 6        | 6                   | 362   | 376 |                                  |                                                                               | PEAKS DB  |
| R.RPFYSNAPQEIFIQQGR.G                       | N    | 110.68 | 2050.0383 | 17     | 2.3 | 1026.0288 | 2 | 31.40 | 11       | F11:1547 | OB5938 H3A raw.raw | 1.6392E6        | 11       | 11                  | 82    | 98  |                                  |                                                                               | PEAKS DB  |
| R.VYDEELQEGHVLVVPQNFAVAGK.S                 | N    | 103.27 | 2540.2910 | 23     | 2.1 | 847.7727  | 3 | 32.93 | 1        | F1:1498  | OB5921 H2 raw.raw  | 1.5993E6        | 6        | 6                   | 435   | 457 |                                  |                                                                               | PEAKS DB  |
| R.RFNLAGNHEQEFLR.Y                          | N    | 100.69 | 1729.8647 | 14     | 1.5 | 577.6297  | 3 | 30.08 | 10       | F10:1438 | OB5937 H3A raw.raw | 6.1619E6        | 6        | 6                   | 195   | 208 |                                  |                                                                               | PEAKS DB  |
| N.GIEETIC(+57.02)TATVK.K                    | N    | 96.25  | 1320.6595 | 12     | 1.3 | 661.3379  | 2 | 29.46 | 5        | F5:1390  | OB5932 H2 raw.raw  | 2.7846E5        | 3        | 3                   | 345   | 356 | Carbamidomethylation             | C7:Carbamidomethylation:1000.00                                               | PEAKS DB  |
| K.FFVPPFQQSPR.A                             | Y    | 95.76  | 1348.6927 | 11     | 1.2 | 675.3545  | 2 | 33.11 | 1        | F1:1496  | OB5921 H2 raw.raw  | 2.8823E6        | 3        | 3                   | 516   | 526 |                                  |                                                                               | PEAKS DB  |
| K.TDSRPSIANLAGENSFIDNLPeeVVAN(+.98)SYGLPR.E | N    | 94.81  | 3545.7273 | 33     | 0.2 | 1182.9166 | 3 | 36.74 | 5        | F5:1825  | OB5932 H2 raw.raw  | 0               | 0        | 0                   | 470   | 502 | Deamidation (NQ)                 | N27:Deamidation (NQ):118.18                                                   | PEAKS DB  |
| R.SPDIYNPQAGSLK.T                           | N    | 87.71  | 1388.6936 | 13     | 2.2 | 695.3556  | 2 | 28.73 | 5        | F5:1375  | OB5932 H2 raw.raw  | 1.3705E6        | 3        | 3                   | 364   | 376 |                                  |                                                                               | PEAKS DB  |
| N.GIEETIC(+57.02)TATVKK.N                   | N    | 84.04  | 1448.7545 | 13     | 0.2 | 725.3847  | 2 | 27.80 | 5        | F5:1296  | OB5932 H2 raw.raw  | 5.4693E5        | 4        | 4                   | 345   | 357 | Carbamidomethylation             | C7:Carbamidomethylation:1000.00                                               | PEAKS DB  |
| S.ISFRQQPEENAC(+57.02)QFQR.L                | N    | 79.32  | 2036.9486 | 16     | 0.8 | 679.9907  | 3 | 27.97 | 11       | F11:1335 | OB5938 H3A raw.raw | 1.7296E5        | 3        | 3                   | 21    | 36  | Carbamidomethylation             | C12:Carbamidomethylation:1000.00                                              | PEAKS DB  |
| R.AHVQVDSNGNRVYDEELQEGHVLVVPQNFAVAGK.S      | N    | 72.39  | 3816.9182 | 35     | 3.0 | 1273.3171 | 3 | 32.25 | 5        | F5:1561  | OB5932 H2 raw.raw  | 3.9867E6        | 2        | 2                   | 423   | 457 |                                  |                                                                               | PEAKS DB  |
| K.FFVPPFQQSPRA.V                            | Y    | 72.23  | 1419.7299 | 12     | 0.8 | 710.8728  | 2 | 33.11 | 1        | F1:1502  | OB5921 H2 raw.raw  | 4.6593E5        | 3        | 3                   | 516   | 527 |                                  |                                                                               | PEAKS DB  |
| R.GYGLIFPGC(+57.02)PSTYEPAQQGR.R.Y          | N    | 71.34  | 2629.2383 | 23     | 1.6 | 877.4214  | 3 | 34.78 | 2        | F2:1543  | OB5925 H3B raw.raw | 5.9452E5        | 2        | 2                   | 99    | 121 | Carbamidomethylation             | C10:Carbamidomethylation:1000.00                                              | PEAKS DB  |
| K.TANELNLLILR.W                             | N    | 68.94  | 1268.7452 | 11     | 0.7 | 635.3803  | 2 | 34.98 | 1        | F1:1608  | OB5921 H2 raw.raw  | 2.5942E7        | 7        | 7                   | 377   | 387 |                                  |                                                                               | PEAKS DB  |
| R.NALRRPFYSNAPQEIFIQQGR.G                   | N    | 68.46  | 2504.3037 | 21     | 1.1 | 835.7761  | 3 | 31.58 | 10       | F10:1548 | OB5937 H3A raw.raw | 9.3975E5        | 4        | 4                   | 78    | 98  |                                  |                                                                               | PEAKS DB  |
| V.PQNFAVAGK.S                               | N    | 67.74  | 930.4923  | 9      | 0.8 | 466.2538  | 2 | 32.44 | 5        | F5:1562  | OB5932 H2 raw.raw  | 4.3278E6        | 2        | 2                   | 449   | 457 |                                  |                                                                               | PEAKS DB  |
| R.S(+57.02)PDIYNPQAGSLK.T                   | N    | 65.06  | 1445.7150 | 13     | 5.4 | 723.8687  | 2 | 28.54 | 6        | F6:1379  | OB5933 H2 raw.raw  | 8.1843E3        | 1        | 1                   | 364   | 376 |                                  | S1:Carbamidomethylation (DHKE, X@N-term):30.83                                | PEAKS PTM |
| R.FNLAGNHEQEFLR.Y                           | N    | 64.93  | 1573.7637 | 13     | 1.4 | 787.8902  | 2 | 30.26 | 11       | F11:1483 | OB5938 H3A raw.raw | 1.9024E5        | 5        | 5                   | 196   | 208 |                                  |                                                                               | PEAKS DB  |
| R.NRSPDIYNPQAGSLKTANELNLLILR.W              | N    | 56.18  | 2909.5723 | 26     | 1.5 | 970.8661  | 3 | 34.50 | 5        | F5:1698  | OB5932 H2 raw.raw  | 6.2575E4        | 1        | 1                   | 362   | 387 |                                  |                                                                               | PEAKS DB  |
| R.NALFVPH(+14.02)YNTNAHSIIYALR.G            | N    | 55.85  | 2327.2175 | 20     | 0.3 | 776.7467  | 3 | 35.36 | 1        | F1:1633  | OB5921 H2 raw.raw  | 1.4175E5        | 1        | 1                   | 401   | 420 |                                  | H7:Methylation(others):18.00                                                  | PEAKS PTM |
| K.FFVPPFQQSP(+15.99)R.A                     | Y    | 54.39  | 1364.6876 | 11     | 0.7 | 683.3516  | 2 | 32.74 | 1        | F1:1483  | OB5921 H2 raw.raw  | 4.7156E5        | 1        | 1                   | 516   | 526 |                                  | P10:Oxidation or Hydroxylation:7.65                                           | PEAKS PTM |
| R.WLGLSAE(+53.92)YGNLYR.N                   | N    | 49.75  | 1594.6866 | 13     | 0.4 | 532.5697  | 3 | 34.87 | 5        | F5:1718  | OB5932 H2 raw.raw  | 1.8492E5        | 2        | 2                   | 388   | 400 | Replacement of 2 protons by iron | E7:Replacement of 2 protons by iron:156.85                                    | PEAKS PTM |
| N.G(+57.02)IETIC(+57.02)TATVK.K             | N    | 46.95  | 1377.6809 | 12     | 0.2 | 689.8479  | 2 | 29.76 | 1        | F1:1306  | OB5921 H2 raw.raw  | 0               | 0        | 0                   | 345   | 356 | Carbamidomethylation             | G1:Carbamidomethylation (DHKE, X@N-term):5.03;C7:Carbamidomethylation:1000.00 | PEAKS PTM |
| total 42 peptides                           |      |        |           |        |     |           |   |       |          |          |                    |                 |          |                     |       |     |                                  |                                                                               |           |

| Peptide                                     | Uniq | -10lgP | Mass      | Length | ppm  | m/z       | z | RT    | Fraction | Scan     | Source File        | Area Raw in gel | #Feature | #Feature Raw in gel | Start | End | PTM                  | AScore                                                                           | Found By  |
|---------------------------------------------|------|--------|-----------|--------|------|-----------|---|-------|----------|----------|--------------------|-----------------|----------|---------------------|-------|-----|----------------------|----------------------------------------------------------------------------------|-----------|
| R.QQPEENAC(+57.02)QFQR.L                    | N    | 45.72  | 1533.6630 | 12     | 1.7  | 767.8401  | 2 | 25.17 | 10       | F10:1164 | OB5937 H3A raw.raw | 6.6881E3        | 2        | 2                   | 25    | 36  | Carbamidomethylation | C8:Carbamidomethylation:1000.00                                                  | PEAKS DB  |
| R.AGQEQENEGGNIFSGTSEFLAQAFQVDDR.Q           | Y    | 45.58  | 3290.4751 | 30     | 1.1  | 1646.2466 | 2 | 41.04 | 7        | F7:2056  | OB5934 H3B raw.raw | 0               | 0        | 0                   | 249   | 278 |                      |                                                                                  | PEAKS DB  |
| N.G(+57.02)IEETIC(+57.02)TATVKK.N           | N    | 44.53  | 1505.7759 | 13     | 2.5  | 753.8971  | 2 | 28.15 | 1        | F1:1210  | OB5921 H2 raw.raw  | 7.9254E4        | 3        | 3                   | 345   | 357 | Carbamidomethylation | G1:Carbamidomethylation (D HKE, X@N-term):26.31;C7:C arbamidomethylation:1000.00 | PEAKS PTM |
| K.TDSRPSIANLAGEN(+.98)SFIDNLPEEVVANSYGLPR.E | N    | 43.89  | 3545.7273 | 33     | 6.3  | 1182.9238 | 3 | 48.72 | 1        | F1:2418  | OB5921 H2 raw.raw  | 9.731E3         | 2        | 2                   | 470   | 502 |                      | N14:Deamidation (NQ):27.86                                                       | PEAKS DB  |
| R.QLKNNNPFK.F                               | N    | 41.09  | 1101.5930 | 9      | -0.6 | 551.8035  | 2 | 27.25 | 6        | F6:1282  | OB5933 H2 raw.raw  | 1.2465E4        | 2        | 2                   | 507   | 515 |                      |                                                                                  | PEAKS DB  |
| R.AGQEQENEGGNIFSGTSEFLAQ(+.98)AFQVDDR.Q     | Y    | 41.09  | 3291.4592 | 30     | 3.4  | 1646.7424 | 2 | 41.11 | 7        | F7:2056  | OB5934 H3B raw.raw | 5.9876E4        | 1        | 1                   | 249   | 278 |                      | Q23:Deamidation (NQ):22.91                                                       | PEAKS DB  |
| R.FNLAGNH(+14.02)EQEFLR.Y                   | N    | 40.10  | 1587.7793 | 13     | 1.9  | 530.2681  | 3 | 32.39 | 9        | F9:1568  | OB5936 H3A raw.raw | 1.4807E5        | 2        | 2                   | 196   | 208 |                      | H7:Methylation(others):33.98                                                     | PEAKS PTM |
| R.Q(-17.03)LKNNNPFK.F                       | N    | 37.25  | 1084.5665 | 9      | 0.4  | 543.2908  | 2 | 28.36 | 6        | F6:1357  | OB5933 H2 raw.raw  | 1.237E4         | 1        | 1                   | 507   | 515 | Pyro-glu from Q      | Q1:Pyro-glu from Q:1000.00                                                       | PEAKS PTM |
| R.N(+.98)ALFVPHYNTNAHSIIYALR.G              | N    | 36.85  | 2314.1858 | 20     | 3.6  | 772.4053  | 3 | 45.28 | 6        | F6:2182  | OB5933 H2 raw.raw  | 6.3088E4        | 1        | 1                   | 401   | 420 |                      | N1:Deamidation (NQ):32.94                                                        | PEAKS DB  |
| R.R(+14.02)FNLAGNHEQEFLR.Y                  | N    | 36.22  | 1743.8805 | 14     | -0.1 | 582.3007  | 3 | 32.19 | 9        | F9:1534  | OB5936 H3A raw.raw | 1.2906E6        | 2        | 2                   | 195   | 208 | Methylation(KR)      | R1:Methylation(KR):67.11                                                         | PEAKS PTM |
| R.NALFVPH(+57.02)YNTNAHSIIYALR.G            | N    | 32.65  | 2370.2231 | 20     | -0.3 | 791.0814  | 3 | 33.37 | 5        | F5:1616  | OB5932 H2 raw.raw  | 6.404E5         | 1        | 1                   | 401   | 420 |                      | H7:Carbamidomethylation (D HKE, X@N-term):11.86                                  | PEAKS PTM |
| R.N(+57.02)ALFVPHYNTNAHSIIYALR.G            | N    | 32.14  | 2370.2231 | 20     | -0.5 | 791.0812  | 3 | 33.18 | 6        | F6:1692  | OB5933 H2 raw.raw  | 7.1997E5        | 1        | 1                   | 401   | 420 |                      | N1:Carbamidomethylation (D HKE, X@N-term):42.70                                  | PEAKS PTM |
| N.GIEETIC(+57.02)T(+14.02)ATVKK.N           | N    | 31.99  | 1462.7701 | 13     | 4.7  | 732.3958  | 2 | 27.97 | 1        | F1:1207  | OB5921 H2 raw.raw  | 1.4542E3        | 1        | 1                   | 345   | 357 | Carbamidomethylation | C7:Carbamidomethylation:1000.00;T8:Methylation(others):6.59                      | PEAKS PTM |
| total 42 peptides                           |      |        |           |        |      |           |   |       |          |          |                    |                 |          |                     |       |     |                      |                                                                                  |           |

| [Protein Coverage](#) | [Supporting Peptides](#) |

Protein Coverage:

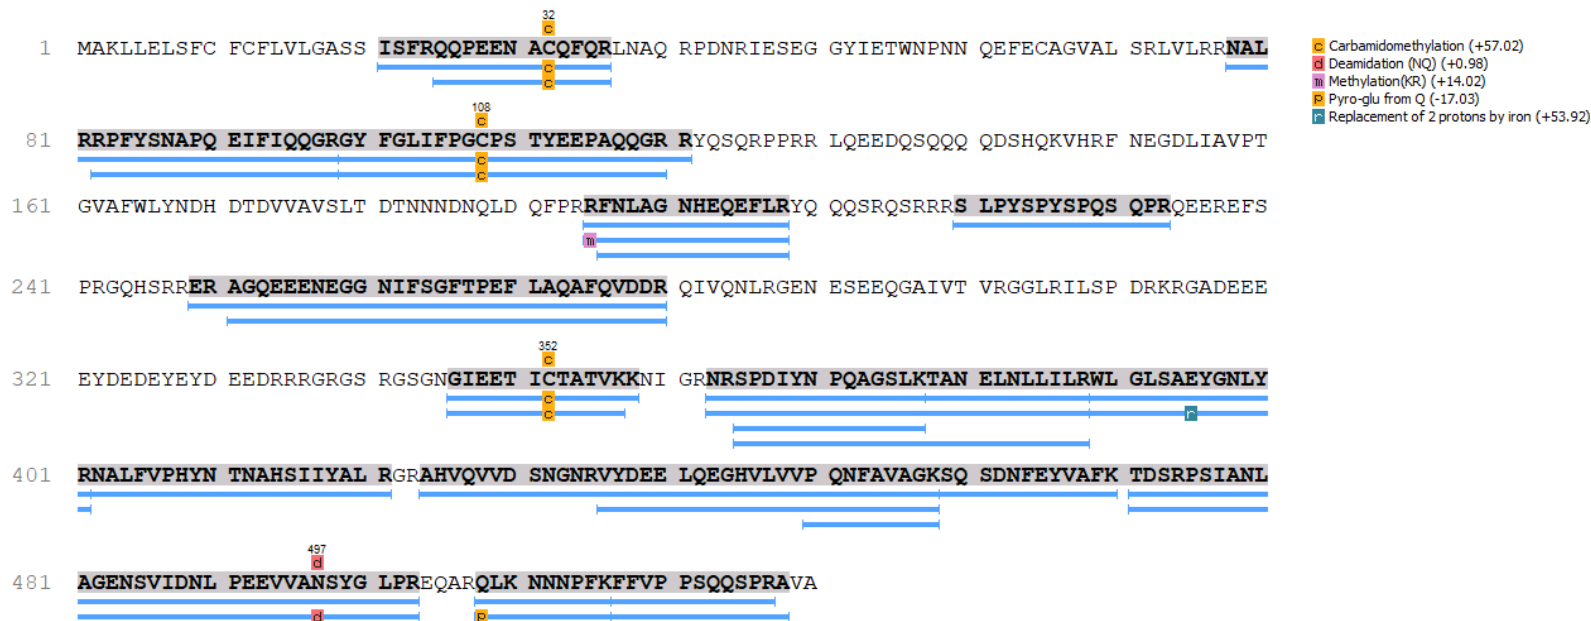

Supporting Peptides:

| Peptide                                     | Uniq | -10lgP | Mass      | Length | ppm | m/z       | z | RT    | Fraction | Scan     | Source File        | Area Raw in gel | #Feature | #Feature Raw in gel | Start | End | PTM                  | AScore                           | Found By |
|---------------------------------------------|------|--------|-----------|--------|-----|-----------|---|-------|----------|----------|--------------------|-----------------|----------|---------------------|-------|-----|----------------------|----------------------------------|----------|
| R.SPDIYNPQAGSLKTANELNLLILR.W                | N    | 134.89 | 2639.4282 | 24     | 0.9 | 880.8175  | 3 | 35.79 | 5        | F5:1765  | OB5932 H2 raw.raw  | 1.8094E6        | 3        | 3                   | 365   | 388 |                      |                                  | PEAKS DB |
| R.NALFVPHYNTNAHSIIYALR.G                    | N    | 123.74 | 2313.2019 | 20     | 2.3 | 1157.6108 | 2 | 33.37 | 5        | F5:1607  | OB5932 H2 raw.raw  | 3.0421E7        | 13       | 12                  | 402   | 421 |                      |                                  | PEAKS DB |
| R.GYFGLIFPGC(+57.02)PSTYEPAQQGR.R           | N    | 122.36 | 2473.1372 | 22     | 3.9 | 1237.5807 | 2 | 36.47 | 2        | F2:1635  | OB5925 H3B raw.raw | 6.1209E5        | 7        | 7                   | 99    | 120 | Carbamidomethylation | C10:Carbamidomethylation:1000.00 | PEAKS DB |
| R.WLGLSAEYGNLYR.N                           | N    | 116.56 | 1540.7673 | 13     | 2.0 | 771.3925  | 2 | 34.87 | 5        | F5:1714  | OB5932 H2 raw.raw  | 3.9701E7        | 18       | 17                  | 389   | 401 |                      |                                  | PEAKS DB |
| R.NRSPDIYNPQAGSLK.T                         | N    | 110.81 | 1658.8376 | 15     | 0.4 | 830.4265  | 2 | 27.80 | 5        | F5:1285  | OB5932 H2 raw.raw  | 8.3597E5        | 6        | 6                   | 363   | 377 |                      |                                  | PEAKS DB |
| R.RPFYSSAPQEIFIQGR.G                        | N    | 110.68 | 2050.0383 | 17     | 2.3 | 1026.0288 | 2 | 31.40 | 11       | F11:1547 | OB5938 H3A raw.raw | 1.6392E6        | 11       | 11                  | 82    | 98  |                      |                                  | PEAKS DB |
| K.SQSDNFEYVAFK.T                            | N    | 105.77 | 1433.6462 | 12     | 1.6 | 717.8315  | 2 | 31.87 | 5        | F5:1530  | OB5932 H2 raw.raw  | 4.4734E6        | 3        | 3                   | 459   | 470 |                      |                                  | PEAKS DB |
| R.VYDEELQEGHVLVVPQNFAVAGK.S                 | N    | 103.27 | 2540.2910 | 23     | 2.1 | 847.7727  | 3 | 32.93 | 1        | F1:1498  | OB5921 H2 raw.raw  | 1.5993E6        | 6        | 6                   | 436   | 458 |                      |                                  | PEAKS DB |
| K.TDSRPSIANLAGENSVIDNLPEEVVAN(+.98)SYGLPR.E | Y    | 100.92 | 3497.7273 | 33     | 2.2 | 1166.9189 | 3 | 35.99 | 5        | F5:1780  | OB5932 H2 raw.raw  | 9.4553E6        | 1        | 1                   | 471   | 503 | Deamidation (NQ)     | N27:Deamidation (NQ):125.75      | PEAKS DB |
| R.RFNLAGNHEQEFLR.Y                          | N    | 100.69 | 1729.8647 | 14     | 1.5 | 577.6297  | 3 | 30.08 | 10       | F10:1438 | OB5937 H3A raw.raw | 6.1619E6        | 6        | 6                   | 195   | 208 |                      |                                  | PEAKS DB |
| N.GIEETIC(+57.02)TATVK.K                    | N    | 96.25  | 1320.6595 | 12     | 1.3 | 661.3379  | 2 | 29.46 | 5        | F5:1390  | OB5932 H2 raw.raw  | 2.7846E5        | 3        | 3                   | 346   | 357 | Carbamidomethylation | C7:Carbamidomethylation:1000.00  | PEAKS DB |
| K.TDSRPSIANLAGENSVIDNLPEEVVANSYGLPR.E       | Y    | 94.24  | 3496.7434 | 33     | 4.7 | 1166.5939 | 3 | 36.68 | 6        | F6:1848  | OB5933 H2 raw.raw  | 2.8259E7        | 4        | 4                   | 471   | 503 |                      |                                  | PEAKS DB |
| R.SPDIYNPQAGSLK.T                           | N    | 87.71  | 1388.6936 | 13     | 2.2 | 695.3556  | 2 | 28.73 | 5        | F5:1375  | OB5932 H2 raw.raw  | 1.3705E6        | 3        | 3                   | 365   | 377 |                      |                                  | PEAKS DB |
| N.GIEETIC(+57.02)TATVKK.N                   | N    | 84.04  | 1448.7545 | 13     | 0.2 | 725.3847  | 2 | 27.80 | 5        | F5:1296  | OB5932 H2 raw.raw  | 5.4693E5        | 4        | 4                   | 346   | 358 | Carbamidomethylation | C7:Carbamidomethylation:1000.00  | PEAKS DB |
| S.ISFRQQPEENAC(+57.02)QFQR.L                | N    | 79.32  | 2036.9486 | 16     | 0.8 | 679.9907  | 3 | 27.97 | 11       | F11:1335 | OB5938 H3A raw.raw | 1.7296E5        | 3        | 3                   | 21    | 36  | Carbamidomethylation | C12:Carbamidomethylation:1000.00 | PEAKS DB |
| total 44 peptides                           |      |        |           |        |     |           |   |       |          |          |                    |                 |          |                     |       |     |                      |                                  |          |



| Peptide                                     | Uniq | -10lgP | Mass      | Length | ppm  | m/z       | z | RT    | Fraction | Scan     | Source File        | Area Raw in gel | #Feature | #Feature Raw in gel | Start | End | PTM                              | AScore                                                                          | Found By  |
|---------------------------------------------|------|--------|-----------|--------|------|-----------|---|-------|----------|----------|--------------------|-----------------|----------|---------------------|-------|-----|----------------------------------|---------------------------------------------------------------------------------|-----------|
| K.TDSRPSIANLAGENSVIDN(+.98)LPEEVVANSYGLPR.E | Y    | 74.65  | 3497.7273 | 33     | 8.8  | 1166.9266 | 3 | 36.67 | 6        | F6:1837  | OB5933 H2 raw.raw  | 9.4553E6        | 1        | 1                   | 471   | 503 |                                  | N19:Deamidation (NQ):0.00                                                       | PEAKS DB  |
| K.TDSRPSIANLAGEN(+.98)SVIDNLPEEVVANSYGLPR.E | Y    | 74.12  | 3497.7273 | 33     | 8.8  | 1166.9266 | 3 | 36.67 | 6        | F6:1848  | OB5933 H2 raw.raw  | 9.4553E6        | 1        | 1                   | 471   | 503 |                                  | N14:Deamidation (NQ):39.44                                                      | PEAKS DB  |
| R.AGQEEENEKGNIFSGFTPEFLAQAFQVDDR.Q          | N    | 73.71  | 3301.4800 | 30     | 5.0  | 1651.7555 | 2 | 41.34 | 9        | F9:2094  | OB5936 H3A raw.raw | 3.0011E5        | 1        | 1                   | 251   | 280 |                                  |                                                                                 | PEAKS DB  |
| R.AHVQVVDSDNGNRVYDEELQEGHVLVVPQNFVAVAGK.S   | N    | 72.39  | 3816.9182 | 35     | 3.0  | 1273.3171 | 3 | 32.25 | 5        | F5:1561  | OB5932 H2 raw.raw  | 3.9867E6        | 2        | 2                   | 424   | 458 |                                  |                                                                                 | PEAKS DB  |
| R.GYGLIFPGC(+57.02)PSTYEPAQQGRR.Y           | N    | 71.34  | 2629.2383 | 23     | 1.6  | 877.4214  | 3 | 34.78 | 2        | F2:1543  | OB5925 H3B raw.raw | 5.9452E5        | 2        | 2                   | 99    | 121 | Carbamidomethylation             | C10:Carbamidomethylation:1000.00                                                | PEAKS DB  |
| K.TANELNLLILR.W                             | N    | 68.94  | 1268.7452 | 11     | 0.7  | 635.3803  | 2 | 34.98 | 1        | F1:1608  | OB5921 H2 raw.raw  | 2.5942E7        | 7        | 7                   | 378   | 388 |                                  |                                                                                 | PEAKS DB  |
| R.NALRPFYSNAPQEIFIQQR.G                     | N    | 68.46  | 2504.3037 | 21     | 1.1  | 835.7761  | 3 | 31.58 | 10       | F10:1548 | OB5937 H3A raw.raw | 9.3975E5        | 4        | 4                   | 78    | 98  |                                  |                                                                                 | PEAKS DB  |
| V.PQNFAVAGK.S                               | N    | 67.74  | 930.4923  | 9      | 0.8  | 466.2538  | 2 | 32.44 | 5        | F5:1562  | OB5932 H2 raw.raw  | 4.3278E6        | 2        | 2                   | 450   | 458 |                                  |                                                                                 | PEAKS DB  |
| K.FFVPPSQQSPR.A                             | N    | 67.19  | 1288.6564 | 11     | 0.0  | 645.3354  | 2 | 28.51 | 1        | F1:1229  | OB5921 H2 raw.raw  | 9.0621E4        | 3        | 3                   | 517   | 527 |                                  |                                                                                 | PEAKS DB  |
| R.S(+57.02)PDIYNPQAGSLK.T                   | N    | 65.06  | 1445.7150 | 13     | 5.4  | 723.8687  | 2 | 28.54 | 6        | F6:1379  | OB5933 H2 raw.raw  | 8.1843E3        | 1        | 1                   | 365   | 377 |                                  | S1:Carbamidomethylation (D HKE, X@N-term):30.83                                 | PEAKS PTM |
| R.FNLAGNHEQEFLR.Y                           | N    | 64.93  | 1573.7637 | 13     | 1.4  | 787.8902  | 2 | 30.26 | 11       | F11:1483 | OB5938 H3A raw.raw | 1.9024E5        | 5        | 5                   | 196   | 208 |                                  |                                                                                 | PEAKS DB  |
| R.ERAGQEEENEKGNIFSGFTPEFLAQAFQVDDR.Q        | N    | 57.80  | 3586.6235 | 32     | 3.1  | 1196.5521 | 3 | 38.65 | 10       | F10:1961 | OB5937 H3A raw.raw | 5.3705E5        | 1        | 1                   | 249   | 280 |                                  |                                                                                 | PEAKS DB  |
| R.NRSPDIYNPQAGSLKTANELNLLILR.W              | N    | 56.18  | 2909.5723 | 26     | 1.5  | 970.8661  | 3 | 34.50 | 5        | F5:1698  | OB5932 H2 raw.raw  | 6.2575E4        | 1        | 1                   | 363   | 388 |                                  |                                                                                 | PEAKS DB  |
| R.NALFVPH(+14.02)YNTNAHSIIYALR.G            | N    | 55.85  | 2327.2175 | 20     | 0.3  | 776.7467  | 3 | 35.36 | 1        | F1:1633  | OB5921 H2 raw.raw  | 1.4175E5        | 1        | 1                   | 402   | 421 |                                  | H7:Methylation(others):18.00                                                    | PEAKS PTM |
| R.AGQEEENEKGN(+.98)IFSGFTPEFLAQAFQVDDR.Q    | N    | 49.87  | 3302.4639 | 30     | 9.8  | 1652.2554 | 2 | 41.31 | 9        | F9:2094  | OB5936 H3A raw.raw | 2.3662E5        | 1        | 1                   | 251   | 280 |                                  | N11:Deamidation (NQ):38.03                                                      | PEAKS DB  |
| R.WLGSAE(+53.92)YGNLYR.N                    | N    | 49.75  | 1594.6866 | 13     | 0.4  | 532.5697  | 3 | 34.87 | 5        | F5:1718  | OB5932 H2 raw.raw  | 1.8492E5        | 2        | 2                   | 389   | 401 | Replacement of 2 protons by iron | E7:Replacement of 2 protons by iron:156.85                                      | PEAKS PTM |
| N.G(+57.02)IETIC(+57.02)TATVK.K             | N    | 46.95  | 1377.6809 | 12     | 0.2  | 689.8479  | 2 | 29.76 | 1        | F1:1306  | OB5921 H2 raw.raw  | 0               | 0        | 0                   | 346   | 357 | Carbamidomethylation             | G1:Carbamidomethylation (D HKE, X@N-term):5.03;C7:Carbamidomethylation:1000.00  | PEAKS PTM |
| R.SLPSPY(+31.99)SPQSQPR.Q                   | N    | 46.01  | 1637.7686 | 14     | 1.0  | 819.8923  | 2 | 29.76 | 9        | F9:1401  | OB5936 H3A raw.raw | 3.8534E4        | 1        | 1                   | 220   | 233 |                                  | Y7:Dihydroxy:0.00                                                               | PEAKS PTM |
| R.QQPEENAC(+57.02)QFQR.L                    | N    | 45.72  | 1533.6630 | 12     | 1.7  | 767.8401  | 2 | 25.17 | 10       | F10:1164 | OB5937 H3A raw.raw | 6.6881E3        | 2        | 2                   | 25    | 36  | Carbamidomethylation             | C8:Carbamidomethylation:1000.00                                                 | PEAKS DB  |
| N.G(+57.02)IETIC(+57.02)TATVKK.N            | N    | 44.53  | 1505.7759 | 13     | 2.5  | 753.8971  | 2 | 28.15 | 1        | F1:1210  | OB5921 H2 raw.raw  | 7.9254E4        | 3        | 3                   | 346   | 358 | Carbamidomethylation             | G1:Carbamidomethylation (D HKE, X@N-term):26.31;C7:Carbamidomethylation:1000.00 | PEAKS PTM |
| K.FFVPPSQQSPRA.V                            | N    | 44.09  | 1359.6935 | 12     | 3.4  | 680.8563  | 2 | 29.07 | 1        | F1:1270  | OB5921 H2 raw.raw  | 1.1159E4        | 1        | 1                   | 517   | 528 |                                  |                                                                                 | PEAKS DB  |
| R.QLKNNNPFK.F                               | N    | 41.09  | 1101.5930 | 9      | -0.6 | 551.8035  | 2 | 27.25 | 6        | F6:1282  | OB5933 H2 raw.raw  | 1.2465E4        | 2        | 2                   | 508   | 516 |                                  |                                                                                 | PEAKS DB  |
| R.FNLAGNH(+14.02)EQEFLR.Y                   | N    | 40.10  | 1587.7793 | 13     | 1.9  | 530.2681  | 3 | 32.39 | 9        | F9:1568  | OB5936 H3A raw.raw | 1.4807E5        | 2        | 2                   | 196   | 208 |                                  | H7:Methylation(others):33.98                                                    | PEAKS PTM |
| R.Q(-17.03)LKNNNPFK.F                       | N    | 37.25  | 1084.5665 | 9      | 0.4  | 543.2908  | 2 | 28.36 | 6        | F6:1357  | OB5933 H2 raw.raw  | 1.237E4         | 1        | 1                   | 508   | 516 | Pyro-glu from Q                  | Q1:Pyro-glu from Q:1000.00                                                      | PEAKS PTM |
| R.N(+.98)ALFVPHYNTNAHSIIYALR.G              | N    | 36.85  | 2314.1858 | 20     | 3.6  | 772.4053  | 3 | 45.28 | 6        | F6:2182  | OB5933 H2 raw.raw  | 6.3088E4        | 1        | 1                   | 402   | 421 |                                  | N1:Deamidation (NQ):32.94                                                       | PEAKS DB  |
| R.R(+14.02)FNLAGNHEQEFLR.Y                  | N    | 36.22  | 1743.8805 | 14     | -0.1 | 582.3007  | 3 | 32.19 | 9        | F9:1534  | OB5936 H3A raw.raw | 1.2906E6        | 2        | 2                   | 195   | 208 | Methylation(KR)                  | R1:Methylation(KR):67.11                                                        | PEAKS PTM |
| R.NALFVPH(+57.02)YNTNAHSIIYALR.G            | N    | 32.65  | 2370.2231 | 20     | -0.3 | 791.0814  | 3 | 33.37 | 5        | F5:1616  | OB5932 H2 raw.raw  | 6.404E5         | 1        | 1                   | 402   | 421 |                                  | H7:Carbamidomethylation (D HKE, X@N-term):11.86                                 | PEAKS PTM |
| total 44 peptides                           |      |        |           |        |      |           |   |       |          |          |                    |                 |          |                     |       |     |                                  |                                                                                 |           |

| Peptide                           | Uniq | -10lgP | Mass      | Length | ppm  | m/z      | z | RT    | Fraction | Scan    | Source File       | Area Raw in gel | #Feature | #Feature Raw in gel | Start | End | PTM                  | AScore                                                        | Found By  |
|-----------------------------------|------|--------|-----------|--------|------|----------|---|-------|----------|---------|-------------------|-----------------|----------|---------------------|-------|-----|----------------------|---------------------------------------------------------------|-----------|
| R.N(+57.02)ALFVPHYNTNAHSIIYALR.G  | N    | 32.14  | 2370.2231 | 20     | -0.5 | 791.0812 | 3 | 33.18 | 6        | F6:1692 | OB5933 H2 raw.raw | 7.1997E5        | 1        | 1                   | 402   | 421 |                      | N1:Carbamidomethylation (D HKE, X@N-term):42.70               | PEAKS PTM |
| N.GIEETIC(+57.02)T(+14.02)ATVKK.N | N    | 31.99  | 1462.7701 | 13     | 4.7  | 732.3958 | 2 | 27.97 | 1        | F1:1207 | OB5921 H2 raw.raw | 1.4542E3        | 1        | 1                   | 346   | 358 | Carbamidomethylation | C7:Carbamidomethylation:10 00.00;T8:Methylation(other s):6.59 | PEAKS PTM |
| total 44 peptides                 |      |        |           |        |      |          |   |       |          |         |                   |                 |          |                     |       |     |                      |                                                               |           |

Q647H4|Q647H4\_ARAHY

back to list

| Protein Coverage | Supporting Peptides |

Protein Coverage:

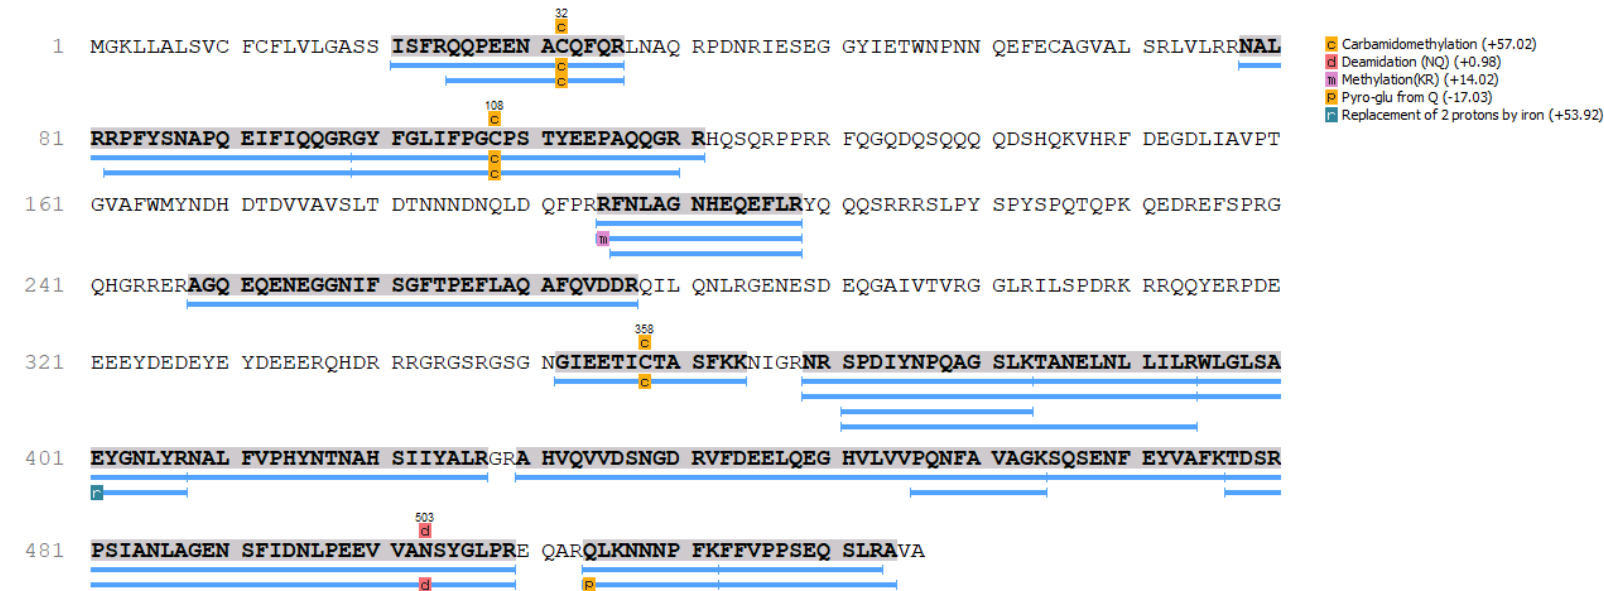

Supporting Peptides:

| Peptide                               | Uniq | -10lgP | Mass      | Length | ppm | m/z       | z | RT    | Fraction | Scan    | Source File        | Area Raw in gel | #Feature | #Feature Raw in gel | Start | End | PTM                  | AScore                           | Found By |
|---------------------------------------|------|--------|-----------|--------|-----|-----------|---|-------|----------|---------|--------------------|-----------------|----------|---------------------|-------|-----|----------------------|----------------------------------|----------|
| R.SPDIYNPQAGSLKTANELNLLILR.W          | N    | 134.89 | 2639.4282 | 24     | 0.9 | 880.8175  | 3 | 35.79 | 5        | F5:1765 | OB5932 H2 raw.raw  | 1.8094E6        | 3        | 3                   | 371   | 394 |                      |                                  | PEAKS DB |
| R.NALFVPHYNTNAHSIIYALR.G              | N    | 123.74 | 2313.2019 | 20     | 2.3 | 1157.6108 | 2 | 33.37 | 5        | F5:1607 | OB5932 H2 raw.raw  | 3.0421E7        | 13       | 12                  | 408   | 427 |                      |                                  | PEAKS DB |
| R.GYGLIFPGC(+57.02)PSTYEPAQQGR.R      | N    | 122.36 | 2473.1372 | 22     | 3.9 | 1237.5807 | 2 | 36.47 | 2        | F2:1635 | OB5925 H3B raw.raw | 6.1209E5        | 7        | 7                   | 99    | 120 | Carbamidomethylation | C10:Carbamidomethylation:1000.00 | PEAKS DB |
| R.WLGLSAEYGNLYR.N                     | N    | 116.56 | 1540.7673 | 13     | 2.0 | 771.3925  | 2 | 34.87 | 5        | F5:1714 | OB5932 H2 raw.raw  | 3.9701E7        | 18       | 17                  | 395   | 407 |                      |                                  | PEAKS DB |
| K.TDSRPSIANLAGENSFIDNLPEEVVANSYGLPR.E | N    | 114.51 | 3544.7434 | 33     | 1.0 | 1182.5896 | 3 | 37.44 | 5        | F5:1890 | OB5932 H2 raw.raw  | 1.1751E8        | 13       | 13                  | 477   | 509 |                      |                                  | PEAKS DB |
| K.SQSENFYVAFK.T                       | N    | 113.90 | 1447.6619 | 12     | 1.7 | 724.8394  | 2 | 31.69 | 5        | F5:1516 | OB5932 H2 raw.raw  | 1.027E7         | 4        | 4                   | 465   | 476 |                      |                                  | PEAKS DB |
| R.NRSPDIYNPQAGSLK.T                   | N    | 110.81 | 1658.8376 | 15     | 0.4 | 830.4265  | 2 | 27.80 | 5        | F5:1285 | OB5932 H2 raw.raw  | 8.3597E5        | 6        | 6                   | 369   | 383 |                      |                                  | PEAKS DB |
| total 39 peptides                     |      |        |           |        |     |           |   |       |          |         |                    |                 |          |                     |       |     |                      |                                  |          |

| Peptide                                      | Uniq | -10lgP | Mass      | Length | ppm  | m/z       | z | RT    | Fraction | Scan     | Source File        | Area Raw in gel | #Feature | #Feature Raw in gel | Start | End | PTM                              | AScore                                                                          | Found By  |
|----------------------------------------------|------|--------|-----------|--------|------|-----------|---|-------|----------|----------|--------------------|-----------------|----------|---------------------|-------|-----|----------------------------------|---------------------------------------------------------------------------------|-----------|
| R.RPFYSNAPQEIFIQQGR.G                        | N    | 110.68 | 2050.0383 | 17     | 2.3  | 1026.0288 | 2 | 31.40 | 11       | F11:1547 | OB5938 H3A raw.raw | 1.6392E6        | 11       | 11                  | 82    | 98  |                                  |                                                                                 | PEAKS DB  |
| R.AHVQVDSNGDRVFDEELQEGHVLVVPQNFAVAGK.S       | Y    | 101.25 | 3801.9075 | 35     | 2.2  | 1268.3125 | 3 | 33.37 | 5        | F5:1626  | OB5932 H2 raw.raw  | 3.9148E6        | 2        | 2                   | 430   | 464 |                                  |                                                                                 | PEAKS DB  |
| R.RFNLAGNHEQEFLR.Y                           | N    | 100.69 | 1729.8647 | 14     | 1.5  | 577.6297  | 3 | 30.08 | 10       | F10:1438 | OB5937 H3A raw.raw | 6.1619E6        | 6        | 6                   | 195   | 208 |                                  |                                                                                 | PEAKS DB  |
| K.TDSRPSIANLAGENSFIDNLPEEVVAN(+.98)SYGLPR.E  | N    | 94.81  | 3545.7273 | 33     | 0.2  | 1182.9166 | 3 | 36.74 | 5        | F5:1825  | OB5932 H2 raw.raw  | 0               | 0        | 0                   | 477   | 509 | Deamidation (NQ)                 | N27:Deamidation (NQ):118.18                                                     | PEAKS DB  |
| R.SPDIYNPQAGSLK.T                            | N    | 87.71  | 1388.6936 | 13     | 2.2  | 695.3556  | 2 | 28.73 | 5        | F5:1375  | OB5932 H2 raw.raw  | 1.3705E6        | 3        | 3                   | 371   | 383 |                                  |                                                                                 | PEAKS DB  |
| R.AGQ(+.98)EQENEGGNIFSGTFEFLAQAFQVDDR.Q      | N    | 84.98  | 3301.4800 | 30     | 5.9  | 1651.7571 | 2 | 39.98 | 10       | F10:2041 | OB5937 H3A raw.raw | 3.2739E5        | 1        | 1                   | 248   | 277 |                                  | Q3:Deamidation (NQ):14.04                                                       | PEAKS DB  |
| S.ISFRQQPEENAC(+57.02)QFQR.L                 | N    | 79.32  | 2036.9486 | 16     | 0.8  | 679.9907  | 3 | 27.97 | 11       | F11:1335 | OB5938 H3A raw.raw | 1.7296E5        | 3        | 3                   | 21    | 36  | Carbamidomethylation             | C12:Carbamidomethylation:1000.00                                                | PEAKS DB  |
| N.GIEETIC(+57.02)TASFKK.N                    | Y    | 76.16  | 1482.7388 | 13     | 1.0  | 742.3774  | 2 | 29.09 | 5        | F5:1362  | OB5932 H2 raw.raw  | 6.7331E5        | 3        | 3                   | 352   | 364 | Carbamidomethylation             | C7:Carbamidomethylation:1000.00                                                 | PEAKS DB  |
| R.AGQEQENEGGNIFSGTFEFLAQAFQVDDR.Q            | N    | 72.48  | 3300.4958 | 30     | 2.5  | 1651.2593 | 2 | 39.97 | 11       | F11:2048 | OB5938 H3A raw.raw | 0               | 0        | 0                   | 248   | 277 |                                  |                                                                                 | PEAKS DB  |
| R.GYGLIFPGC(+57.02)PSTYEPAQQGRR.H            | N    | 71.34  | 2629.2383 | 23     | 1.6  | 877.4214  | 3 | 34.78 | 2        | F2:1543  | OB5925 H3B raw.raw | 5.9452E5        | 2        | 2                   | 99    | 121 | Carbamidomethylation             | C10:Carbamidomethylation:1000.00                                                | PEAKS DB  |
| K.TANELNLLILR.W                              | N    | 68.94  | 1268.7452 | 11     | 0.7  | 635.3803  | 2 | 34.98 | 1        | F1:1608  | OB5921 H2 raw.raw  | 2.5942E7        | 7        | 7                   | 384   | 394 |                                  |                                                                                 | PEAKS DB  |
| K.FFVPPSEQSLRA.V                             | Y    | 68.71  | 1376.7087 | 12     | 1.8  | 689.3629  | 2 | 31.25 | 1        | F1:1399  | OB5921 H2 raw.raw  | 1.104E6         | 3        | 3                   | 523   | 534 |                                  |                                                                                 | PEAKS DB  |
| R.NALRRPFYSNAPQEIFIQQGR.G                    | N    | 68.46  | 2504.3037 | 21     | 1.1  | 835.7761  | 3 | 31.58 | 10       | F10:1548 | OB5937 H3A raw.raw | 9.3975E5        | 4        | 4                   | 78    | 98  |                                  |                                                                                 | PEAKS DB  |
| K.FFVPPSEQSLR.A                              | Y    | 68.29  | 1305.6716 | 11     | -0.5 | 653.8428  | 2 | 30.96 | 5        | F5:1479  | OB5932 H2 raw.raw  | 5.8436E5        | 3        | 3                   | 523   | 533 |                                  |                                                                                 | PEAKS DB  |
| V.PQNFAVAGK.S                                | N    | 67.74  | 930.4923  | 9      | 0.8  | 466.2538  | 2 | 32.44 | 5        | F5:1562  | OB5932 H2 raw.raw  | 4.3278E6        | 2        | 2                   | 456   | 464 |                                  |                                                                                 | PEAKS DB  |
| R.S(+57.02)PDIYNPQAGSLK.T                    | N    | 65.06  | 1445.7150 | 13     | 5.4  | 723.8687  | 2 | 28.54 | 6        | F6:1379  | OB5933 H2 raw.raw  | 8.1843E3        | 1        | 1                   | 371   | 383 |                                  | S1:Carbamidomethylation (DHKE, X@N-term):30.83                                  | PEAKS PTM |
| R.FNLAGNHEQEFLR.Y                            | N    | 64.93  | 1573.7637 | 13     | 1.4  | 787.8902  | 2 | 30.26 | 11       | F11:1483 | OB5938 H3A raw.raw | 1.9024E5        | 5        | 5                   | 196   | 208 |                                  |                                                                                 | PEAKS DB  |
| N.G(+57.02)IETIC(+57.02)TASFKK.N             | Y    | 60.94  | 1539.7603 | 13     | 0.5  | 770.8878  | 2 | 29.27 | 5        | F5:1382  | OB5932 H2 raw.raw  | 6.2038E4        | 2        | 2                   | 352   | 364 | Carbamidomethylation             | G1:Carbamidomethylation (DHKE, X@N-term):22.85; C7:Carbamidomethylation:1000.00 | PEAKS PTM |
| R.NRSPDIYNPQAGSLKTANELNLLILR.W               | N    | 56.18  | 2909.5723 | 26     | 1.5  | 970.8661  | 3 | 34.50 | 5        | F5:1698  | OB5932 H2 raw.raw  | 6.2575E4        | 1        | 1                   | 369   | 394 |                                  |                                                                                 | PEAKS DB  |
| R.NALFVPH(+14.02)YNTNAHSIIYALR.G             | N    | 55.85  | 2327.2175 | 20     | 0.3  | 776.7467  | 3 | 35.36 | 1        | F1:1633  | OB5921 H2 raw.raw  | 1.4175E5        | 1        | 1                   | 408   | 427 |                                  | H7:Methylation(others):18.00                                                    | PEAKS PTM |
| R.AHVQVDSNGDRVFDEELQ(+.98)EGHVLVVPQNFAVAGK.S | Y    | 55.56  | 3802.8914 | 35     | 6.3  | 951.7361  | 4 | 33.37 | 5        | F5:1633  | OB5932 H2 raw.raw  | 6.1141E4        | 1        | 1                   | 430   | 464 |                                  | Q19:Deamidation (NQ):0.00                                                       | PEAKS DB  |
| R.WLGLSAE(+53.92)YGNLYR.N                    | N    | 49.75  | 1594.6866 | 13     | 0.4  | 532.5697  | 3 | 34.87 | 5        | F5:1718  | OB5932 H2 raw.raw  | 1.8492E5        | 2        | 2                   | 395   | 407 | Replacement of 2 protons by iron | E7:Replacement of 2 protons by iron:156.85                                      | PEAKS PTM |
| R.QQPEENAC(+57.02)QFQR.L                     | N    | 45.72  | 1533.6630 | 12     | 1.7  | 767.8401  | 2 | 25.17 | 10       | F10:1164 | OB5937 H3A raw.raw | 6.6881E3        | 2        | 2                   | 25    | 36  | Carbamidomethylation             | C8:Carbamidomethylation:1000.00                                                 | PEAKS DB  |
| total 39 peptides                            |      |        |           |        |      |           |   |       |          |          |                    |                 |          |                     |       |     |                                  |                                                                                 |           |

| Peptide                                     | Uniq | -10lgP | Mass      | Length | ppm  | m/z       | z | RT    | Fraction | Scan    | Source File        | Area Raw in gel | #Feature | #Feature Raw in gel | Start | End | PTM                  | AScore                                                       | Found By  |
|---------------------------------------------|------|--------|-----------|--------|------|-----------|---|-------|----------|---------|--------------------|-----------------|----------|---------------------|-------|-----|----------------------|--------------------------------------------------------------|-----------|
| K.TDSRPSIANLAGEN(+.98)SFIDNLPeeVVANSYGLPR.E | N    | 43.89  | 3545.7273 | 33     | 6.3  | 1182.9238 | 3 | 48.72 | 1        | F1:2418 | OB5921 H2 raw.raw  | 9.731E3         | 2        | 2                   | 477   | 509 |                      | N14:Deamidation (NQ):27.86                                   | PEAKS DB  |
| R.QLKNNNPFK.F                               | N    | 41.09  | 1101.5930 | 9      | -0.6 | 551.8035  | 2 | 27.25 | 6        | F6:1282 | OB5933 H2 raw.raw  | 1.2465E4        | 2        | 2                   | 514   | 522 |                      |                                                              | PEAKS DB  |
| R.FNLAGNH(+14.02)EQEFLR.Y                   | N    | 40.10  | 1587.7793 | 13     | 1.9  | 530.2681  | 3 | 32.39 | 9        | F9:1568 | OB5936 H3A raw.raw | 1.4807E5        | 2        | 2                   | 196   | 208 |                      | H7:Methylation(others):33.98                                 | PEAKS PTM |
| R.Q(-17.03)LKNNNPFK.F                       | N    | 37.25  | 1084.5665 | 9      | 0.4  | 543.2908  | 2 | 28.36 | 6        | F6:1357 | OB5933 H2 raw.raw  | 1.237E4         | 1        | 1                   | 514   | 522 | Pyro-glu from Q      | Q1:Pyro-glu from Q:1000.00                                   | PEAKS PTM |
| R.N(+.98)ALFVPHYNTNAHSIIYALR.G              | N    | 36.85  | 2314.1858 | 20     | 3.6  | 772.4053  | 3 | 45.28 | 6        | F6:2182 | OB5933 H2 raw.raw  | 6.3088E4        | 1        | 1                   | 408   | 427 |                      | N1:Deamidation (NQ):32.94                                    | PEAKS DB  |
| R.R(+14.02)FNLAGNHEQEFLR.Y                  | N    | 36.22  | 1743.8805 | 14     | -0.1 | 582.3007  | 3 | 32.19 | 9        | F9:1534 | OB5936 H3A raw.raw | 1.2906E6        | 2        | 2                   | 195   | 208 | Methylation(KR)      | R1:Methylation(KR):67.11                                     | PEAKS PTM |
| N.GIEETIC(+57.02)T(+14.02)ASFKK.N           | Y    | 36.04  | 1496.7544 | 13     | 1.2  | 749.3854  | 2 | 29.27 | 5        | F5:1378 | OB5932 H2 raw.raw  | 2.0631E4        | 1        | 1                   | 352   | 364 | Carbamidomethylation | C7:Carbamidomethylation:1000.00;T8:Methylation(others):24.32 | PEAKS PTM |
| R.NALFVPH(+57.02)YNTNAHSIIYALR.G            | N    | 32.65  | 2370.2231 | 20     | -0.3 | 791.0814  | 3 | 33.37 | 5        | F5:1616 | OB5932 H2 raw.raw  | 6.404E5         | 1        | 1                   | 408   | 427 |                      | H7:Carbamidomethylation (DHKE, X@N-term):11.86               | PEAKS PTM |
| R.N(+57.02)ALFVPHYNTNAHSIIYALR.G            | N    | 32.14  | 2370.2231 | 20     | -0.5 | 791.0812  | 3 | 33.18 | 6        | F6:1692 | OB5933 H2 raw.raw  | 7.1997E5        | 1        | 1                   | 408   | 427 |                      | N1:Carbamidomethylation (DHKE, X@N-term):42.70               | PEAKS PTM |
| total 39 peptides                           |      |        |           |        |      |           |   |       |          |         |                    |                 |          |                     |       |     |                      |                                                              |           |

E9LFE8|E9LFE8\_ARAHY

back to list

Protein Coverage | Supporting Peptides |

Protein Coverage:

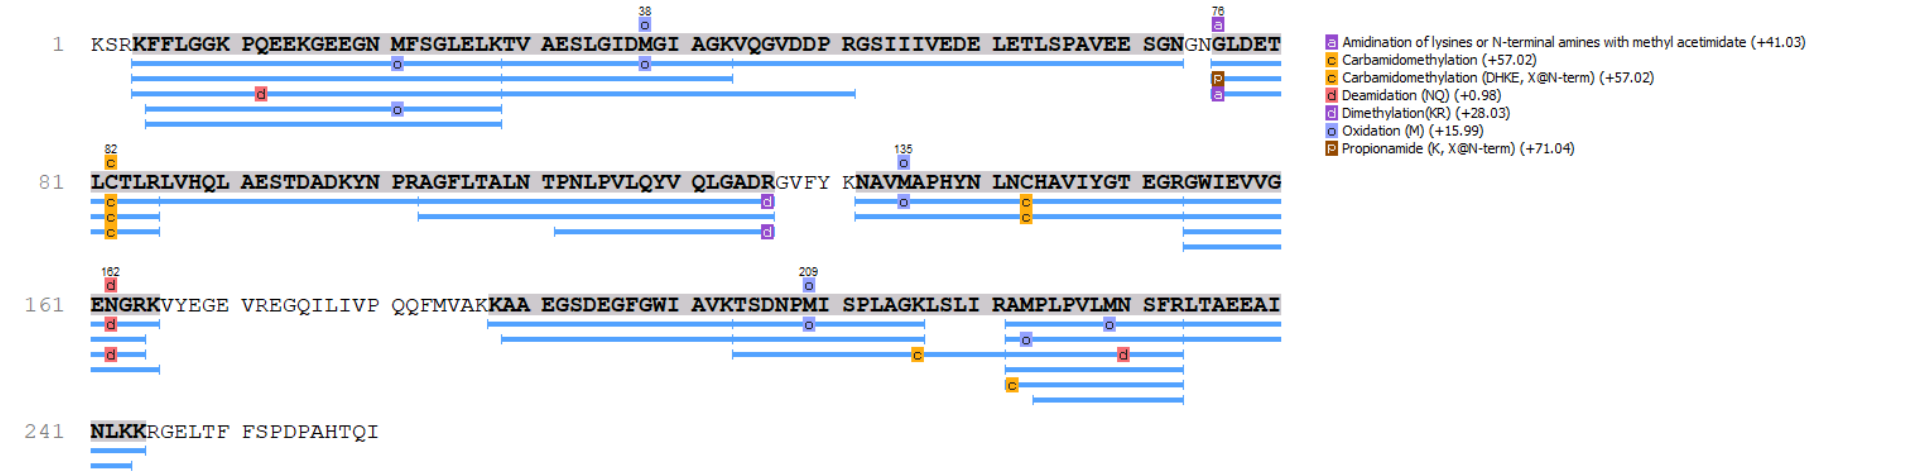

Supporting Peptides:

| Peptide                              | Uniq | -10lgP | Mass      | Length | ppm | m/z      | z | RT    | Fraction | Scan    | Source File        | Area Raw in gel | #Feature | #Feature Raw in gel | Start | End | PTM                  | AScore                           | Found By |
|--------------------------------------|------|--------|-----------|--------|-----|----------|---|-------|----------|---------|--------------------|-----------------|----------|---------------------|-------|-----|----------------------|----------------------------------|----------|
| K.FFLGGKPQEEKGEEGNMFSGLELK.T         | N    | 136.55 | 2670.2998 | 24     | 2.4 | 891.1094 | 3 | 34.78 | 2        | F2:1553 | OB5925 H3B raw.raw | 1.858E7         | 6        | 6                   | 5     | 28  |                      |                                  | PEAKS DB |
| K.NAVMA PHYNLNC(+57.02)HAVIYGT EGR.G | Y    | 132.14 | 2486.1582 | 22     | 2.2 | 829.7285 | 3 | 30.40 | 5        | F5:1439 | OB5932 H2 raw.raw  | 4.9994E6        | 6        | 6                   | 132   | 153 | Carbamidomethylation | C12:Carbamidomethylation:1000.00 | PEAKS DB |
| total 38 peptides                    |      |        |           |        |     |          |   |       |          |         |                    |                 |          |                     |       |     |                      |                                  |          |

| Peptide                                     | Uniq | -10lgP | Mass      | Length | ppm  | m/z       | z | RT    | Fraction | Scan    | Source File              | Area Raw in gel | #Feature | #Feature Raw in gel | Start | End | PTM                                    | AScore                                                            | Found By     |
|---------------------------------------------|------|--------|-----------|--------|------|-----------|---|-------|----------|---------|--------------------------|-----------------|----------|---------------------|-------|-----|----------------------------------------|-------------------------------------------------------------------|--------------|
| K.KAAEGSDEFGWIAVK.T                         | Y    | 128.06 | 1663.8206 | 16     | 1.7  | 832.9190  | 2 | 31.69 | 5        | F5:1528 | OB5932<br>H2<br>raw.raw  | 1.5376E6        | 4        | 4                   | 188   | 203 |                                        |                                                                   | PEAKS<br>DB  |
| K.TVAESLGIDMGIAGK.V                         | Y    | 119.07 | 1460.7544 | 15     | 2.2  | 731.3861  | 2 | 33.48 | 7        | F7:1604 | OB5934<br>H3B<br>raw.raw | 4.8068E6        | 3        | 3                   | 29    | 43  |                                        |                                                                   | PEAKS<br>DB  |
| K.AAEGSDEFGWIAVK.T                          | Y    | 118.28 | 1535.7256 | 15     | 2.2  | 768.8718  | 2 | 33.74 | 5        | F5:1648 | OB5932<br>H2<br>raw.raw  | 7.8717E6        | 5        | 5                   | 189   | 203 |                                        |                                                                   | PEAKS<br>DB  |
| R.AGFLTALNTPNLPVLQYVQLGADR(+28.03).G        | Y    | 112.27 | 2598.4170 | 24     | 4.3  | 1300.2213 | 2 | 39.90 | 5        | F5:2005 | OB5932<br>H2<br>raw.raw  | 7.2798E7        | 10       | 10                  | 103   | 126 | Dimethylation(KR)                      | R24:Dimethylation(KR):10<br>00.00                                 | PEAKS<br>PTM |
| K.NAVM(+15.99)APHYNLNC(+57.02)HAVIYGTTEGR.G | Y    | 108.73 | 2502.1533 | 22     | 1.0  | 835.0592  | 3 | 29.83 | 5        | F5:1417 | OB5932<br>H2<br>raw.raw  | 6.8396E5        | 4        | 4                   | 132   | 153 | Oxidation (M);<br>Carbamidomethylation | M4:Oxidation (M):1000.0<br>0;C12:Carbamidomethylati<br>on:1000.00 | PEAKS<br>DB  |
| R.KFFLGKQPQEEKGEEGNMFSGLELK.T               | N    | 104.82 | 2798.3948 | 25     | 2.1  | 933.8075  | 3 | 34.42 | 2        | F2:1518 | OB5925<br>H3B<br>raw.raw | 1.4026E7        | 9        | 9                   | 4     | 28  |                                        |                                                                   | PEAKS<br>DB  |
| R.AMPLPVLMN(+.98)SFR.L                      | Y    | 104.49 | 1375.6992 | 12     | 1.0  | 688.8575  | 2 | 35.55 | 1        | F1:1651 | OB5921<br>H2<br>raw.raw  | 2.0235E5        | 2        | 2                   | 222   | 233 | Deamidation (NQ)                       | N9:Deamidation (NQ):100<br>0.00                                   | PEAKS<br>DB  |
| R.AMPLPVLMSFR.L                             | Y    | 103.81 | 1374.7152 | 12     | 2.1  | 688.3663  | 2 | 36.34 | 5        | F5:1802 | OB5932<br>H2<br>raw.raw  | 1.702E7         | 4        | 4                   | 222   | 233 |                                        |                                                                   | PEAKS<br>DB  |
| R.GWIEVVGENG.R.K                            | Y    | 103.10 | 1214.6044 | 11     | 0.0  | 608.3094  | 2 | 31.69 | 5        | F5:1532 | OB5932<br>H2<br>raw.raw  | 6.914E5         | 3        | 3                   | 154   | 164 |                                        |                                                                   | PEAKS<br>DB  |
| K.TVAESLGIDM(+15.99)GIAGK.V                 | Y    | 98.70  | 1476.7494 | 15     | 1.8  | 739.3833  | 2 | 30.84 | 7        | F7:1465 | OB5934<br>H3B<br>raw.raw | 3.5299E4        | 3        | 3                   | 29    | 43  | Oxidation (M)                          | M10:Oxidation (M):1000.0<br>0                                     | PEAKS<br>DB  |
| K.TSDNPMISPLAGK.L                           | Y    | 96.67  | 1329.6598 | 13     | 2.4  | 665.8387  | 2 | 29.79 | 1        | F1:1298 | OB5921<br>H2<br>raw.raw  | 2.7946E6        | 5        | 5                   | 204   | 216 |                                        |                                                                   | PEAKS<br>DB  |
| R.AMPLPVLN(+15.99)NSFR.L                    | Y    | 95.24  | 1390.7101 | 12     | 1.9  | 696.3636  | 2 | 34.43 | 1        | F1:1551 | OB5921<br>H2<br>raw.raw  | 2.5374E6        | 3        | 3                   | 222   | 233 | Oxidation (M)                          | M8:Oxidation (M):151.86                                           | PEAKS<br>DB  |
| R.GWIEVVGENG(+.98)GR.K                      | Y    | 92.90  | 1215.5884 | 11     | 0.7  | 608.8019  | 2 | 32.18 | 1        | F1:1446 | OB5921<br>H2<br>raw.raw  | 9.7206E4        | 1        | 1                   | 154   | 164 | Deamidation (NQ)                       | N9:Deamidation (NQ):100<br>0.00                                   | PEAKS<br>DB  |
| K.FFLGGKQPQEEKGEEGNM(+15.99)FSGLELK.T       | N    | 92.75  | 2686.2947 | 24     | 1.7  | 896.4404  | 3 | 32.74 | 2        | F2:1411 | OB5925<br>H3B<br>raw.raw | 2.6867E6        | 4        | 4                   | 5     | 28  | Oxidation (M)                          | M17:Oxidation (M):1000.0<br>0                                     | PEAKS<br>DB  |
| R.LVHQLAESTDADKYNPR.A                       | N    | 86.93  | 1955.9701 | 17     | 1.5  | 652.9983  | 3 | 28.54 | 5        | F5:1329 | OB5932<br>H2<br>raw.raw  | 2.5664E6        | 9        | 9                   | 86    | 102 |                                        |                                                                   | PEAKS<br>DB  |
| R.AM(+15.99)PLPVLMSFR.L                     | Y    | 85.64  | 1390.7101 | 12     | 1.9  | 696.3636  | 2 | 34.43 | 1        | F1:1586 | OB5921<br>H2<br>raw.raw  | 2.5374E6        | 3        | 3                   | 222   | 233 | Oxidation (M)                          | M2:Oxidation (M):90.85                                            | PEAKS<br>DB  |
| N.GLDETLC(+57.02)TLR.L                      | Y    | 83.89  | 1176.5808 | 10     | 3.0  | 589.2994  | 2 | 30.96 | 5        | F5:1472 | OB5932<br>H2<br>raw.raw  | 1.5884E6        | 5        | 5                   | 76    | 85  | Carbamidomethylation                   | C7:Carbamidomethylation:<br>1000.00                               | PEAKS<br>DB  |
| R.KFFLGKQPQEEKGEEGNM(+15.99)FSGLELK.T       | N    | 80.26  | 2814.3896 | 25     | 0.9  | 704.6053  | 4 | 32.34 | 7        | F7:1545 | OB5934<br>H3B<br>raw.raw | 8.2213E5        | 2        | 2                   | 4     | 28  | Oxidation (M)                          | M18:Oxidation (M):1000.0<br>0                                     | PEAKS<br>DB  |
| R.GWIEVVGENG(+.98)GRK.V                     | Y    | 80.12  | 1343.6833 | 12     | 0.4  | 672.8492  | 2 | 30.33 | 1        | F1:1342 | OB5921<br>H2<br>raw.raw  | 6.5174E5        | 3        | 3                   | 154   | 165 | Deamidation (NQ)                       | N9:Deamidation (NQ):100<br>0.00                                   | PEAKS<br>DB  |
| R.LTAEAINLKK.R                              | Y    | 77.51  | 1228.7026 | 11     | 0.0  | 615.3586  | 2 | 27.27 | 1        | F1:1147 | OB5921<br>H2<br>raw.raw  | 3.3199E5        | 4        | 4                   | 234   | 244 |                                        |                                                                   | PEAKS<br>DB  |
| R.GWIEVVGENG.RK.V                           | Y    | 76.86  | 1342.6993 | 12     | 0.8  | 672.3575  | 2 | 30.17 | 1        | F1:1331 | OB5921<br>H2<br>raw.raw  | 3.292E5         | 3        | 3                   | 154   | 165 |                                        |                                                                   | PEAKS<br>DB  |
| R.LTAEAINLK.K                               | Y    | 73.12  | 1100.6077 | 10     | -0.1 | 551.3110  | 2 | 29.82 | 5        | F5:1410 | OB5932<br>H2<br>raw.raw  | 2.6604E5        | 3        | 3                   | 234   | 243 |                                        |                                                                   | PEAKS<br>DB  |
| K.VQGVDDPRGSIIVEDELETLSPAEEESGN.G           | Y    | 68.06  | 3166.5518 | 30     | 3.5  | 1584.2887 | 2 | 39.25 | 7        | F7:1952 | OB5934<br>H3B<br>raw.raw | 3.2404E6        | 3        | 3                   | 44    | 73  |                                        |                                                                   | PEAKS<br>DB  |
| total 38 peptides                           |      |        |           |        |      |           |   |       |          |         |                          |                 |          |                     |       |     |                                        |                                                                   |              |

**Q9FZ11 | Q9FZ11\_ARAHY**

[back to list](#)| [Protein Coverage](#) | [Supporting Peptides](#) |

### Protein Coverage:

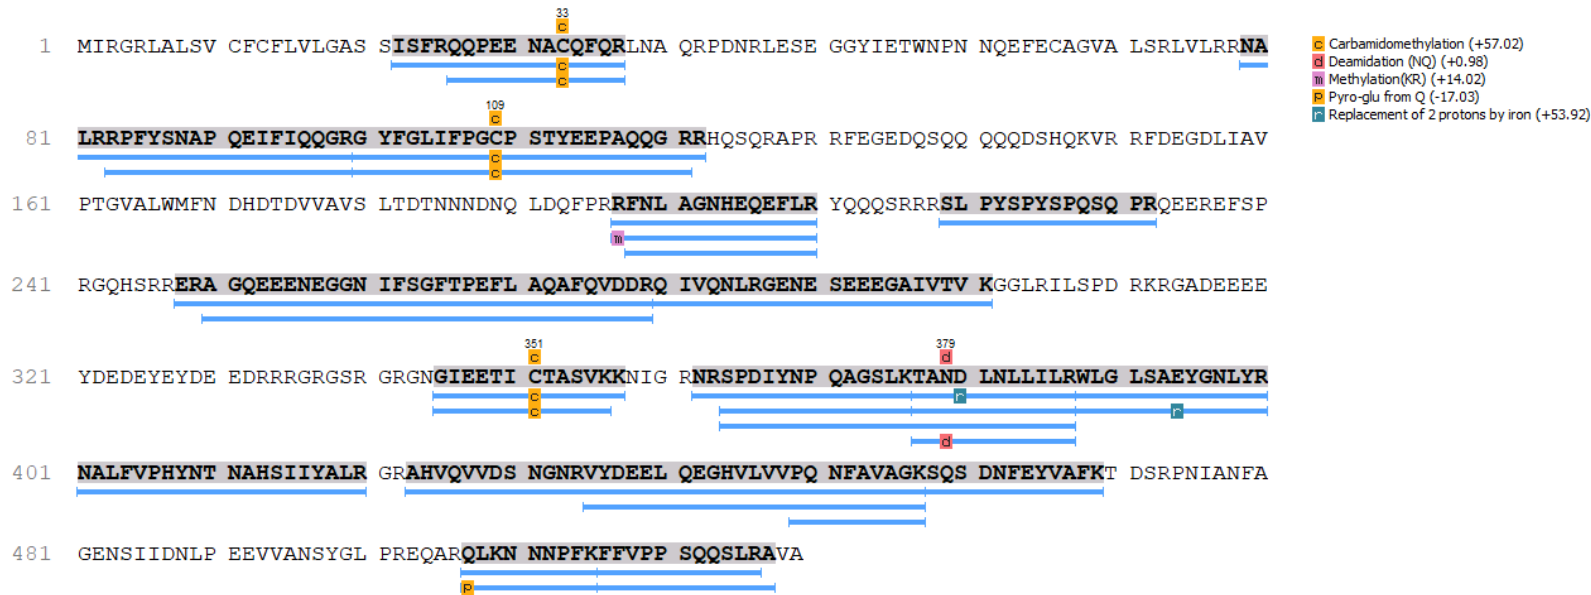

Supporting Peptides:

| Peptide                          | Uniq | -10lgP | Mass      | Length | ppm | m/z       | z | RT    | Fraction | Scan     | Source File        | Area Raw in gel | #Feature | #Feature Raw in gel | Start | End | PTM                  | AScore                            | Found By |
|----------------------------------|------|--------|-----------|--------|-----|-----------|---|-------|----------|----------|--------------------|-----------------|----------|---------------------|-------|-----|----------------------|-----------------------------------|----------|
| R.NALFVPHYNTNAHSIIYALR.G         | N    | 123.74 | 2313.2019 | 20     | 2.3 | 1157.6108 | 2 | 33.37 | 5        | F5:1607  | OB5932 H2 raw.raw  | 3.0421E7        | 13       | 12                  | 401   | 420 |                      |                                   | PEAKS DB |
| R.GYGLIFPGCP(+57.02)STYEPAQQGR.R | N    | 122.36 | 2473.1372 | 22     | 3.9 | 1237.5807 | 2 | 36.47 | 2        | F2:1635  | OB5925 H3B raw.raw | 6.1209E5        | 7        | 7                   | 100   | 121 | Carbamidomethylation | C10:Carbamidomethylation:10 00.00 | PEAKS DB |
| R.WLGLSAEYGNLYR.N                | N    | 116.56 | 1540.7673 | 13     | 2.0 | 771.3925  | 2 | 34.87 | 5        | F5:1714  | OB5932 H2 raw.raw  | 3.9701E7        | 18       | 17                  | 388   | 400 |                      |                                   | PEAKS DB |
| R.NRSPDIYNPQAGSLK.T              | N    | 110.81 | 1658.8376 | 15     | 0.4 | 830.4265  | 2 | 27.80 | 5        | F5:1285  | OB5932 H2 raw.raw  | 8.3597E5        | 6        | 6                   | 362   | 376 |                      |                                   | PEAKS DB |
| R.RPFYSNAPQEIFIQQGR.G            | N    | 110.68 | 2050.0383 | 17     | 2.3 | 1026.0288 | 2 | 31.40 | 11       | F11:1547 | OB5938 H3A raw.raw | 1.6392E6        | 11       | 11                  | 83    | 99  |                      |                                   | PEAKS DB |
| K.SQSDNFEYVAFK.T                 | N    | 105.77 | 1433.6462 | 12     | 1.6 | 717.8315  | 2 | 31.87 | 5        | F5:1530  | OB5932 H2 raw.raw  | 4.4734E6        | 3        | 3                   | 458   | 469 |                      |                                   | PEAKS DB |
| R.VYDEELQEGHVLVVPQNFAVAGK.S      | N    | 103.27 | 2540.2910 | 23     | 2.1 | 847.7727  | 3 | 32.93 | 1        | F1:1498  | OB5921 H2 raw.raw  | 1.5993E6        | 6        | 6                   | 435   | 457 |                      |                                   | PEAKS DB |
| R.RFNLAGNHEQEFLR.Y               | N    | 100.69 | 1729.8647 | 14     | 1.5 | 577.6297  | 3 | 30.08 | 10       | F10:1438 | OB5937 H3A raw.raw | 6.1619E6        | 6        | 6                   | 197   | 210 |                      |                                   | PEAKS DB |
| R.QIVQNLRGENESEEEGAIVTVK.G       | Y    | 92.55  | 2441.2397 | 22     | 1.7 | 814.7552  | 3 | 29.14 | 11       | F11:1413 | OB5938 H3A raw.raw | 3.4068E5        | 3        | 3                   | 280   | 301 |                      |                                   | PEAKS DB |
| R.SPDIYNPQAGSLK.T                | N    | 87.71  | 1388.6936 | 13     | 2.2 | 695.3556  | 2 | 28.73 | 5        | F5:1375  | OB5932 H2 raw.raw  | 1.3705E6        | 3        | 3                   | 364   | 376 |                      |                                   | PEAKS DB |
| N.GIEETIC(+57.02)TASVK.K         | N    | 85.93  | 1306.6438 | 12     | 1.2 | 654.3300  | 2 | 29.09 | 5        | F5:1373  | OB5932 H2 raw.raw  | 2.32E5          | 2        | 2                   | 345   | 356 | Carbamidomethylation | C7:Carbamidomethylation:100 0.00  | PEAKS DB |
| R.SPDIYNPQAGSLKTANDLNLLILR.W     | N    | 81.29  | 2625.4126 | 24     | 0.2 | 876.1450  | 3 | 35.24 | 5        | F5:1743  | OB5932 H2 raw.raw  | 1.5604E5        | 1        | 1                   | 364   | 387 |                      |                                   | PEAKS DB |
| S.ISFRQQPEENAC(+57.02)QFQR.L     | N    | 79.32  | 2036.9486 | 16     | 0.8 | 679.9907  | 3 | 27.97 | 11       | F11:1335 | OB5938 H3A raw.raw | 1.7296E5        | 3        | 3                   | 22    | 37  | Carbamidomethylation | C12:Carbamidomethylation:10 00.00 | PEAKS DB |
| K.FFVPPSQSLRA.V                  | Y    | 75.54  | 1375.7247 | 12     | 1.8 | 688.8708  | 2 | 30.77 | 6        | F6:1487  | OB5933 H2 raw.raw  | 1.3188E6        | 3        | 3                   | 516   | 527 |                      |                                   | PEAKS DB |
| total 40 peptides                |      |        |           |        |     |           |   |       |          |          |                    |                 |          |                     |       |     |                      |                                   |          |

| Peptide                                                | Uniq | -10lgP | Mass      | Length | ppm  | m/z       | z | RT    | Fraction | Scan     | Source File        | Area Raw in gel | #Feature | #Feature Raw in gel | Start | End | PTM                              | AScore                                                                          | Found By  |
|--------------------------------------------------------|------|--------|-----------|--------|------|-----------|---|-------|----------|----------|--------------------|-----------------|----------|---------------------|-------|-----|----------------------------------|---------------------------------------------------------------------------------|-----------|
| R.AGQEEENE <sup>EGGN</sup> IFSGFTPEFLAQAFQVDDR.Q       | N    | 73.71  | 3301.4800 | 30     | 5.0  | 1651.7555 | 2 | 41.34 | 9        | F9:2094  | OB5936 H3A raw.raw | 3.0011E5        | 1        | 1                   | 250   | 279 |                                  |                                                                                 | PEAKS DB  |
| R.AHVQVVD <sup>SGN</sup> NRVYDEELQEGHVLVVPQNFAVAGK.S   | N    | 72.39  | 3816.9182 | 35     | 3.0  | 1273.3171 | 3 | 32.25 | 5        | F5:1561  | OB5932 H2 raw.raw  | 3.9867E6        | 2        | 2                   | 423   | 457 |                                  |                                                                                 | PEAKS DB  |
| N.GIEETIC(+57.02)TASVKK.N                              | N    | 72.27  | 1434.7388 | 13     | 1.2  | 718.3775  | 2 | 27.26 | 5        | F5:1253  | OB5932 H2 raw.raw  | 2.7175E5        | 3        | 3                   | 345   | 357 | Carbamidomethylation             | C7:Carbamidomethylation:100.0.00                                                | PEAKS DB  |
| K.FVFPSPQSLR.A                                         | Y    | 72.07  | 1304.6876 | 11     | 0.5  | 653.3514  | 2 | 30.40 | 5        | F5:1443  | OB5932 H2 raw.raw  | 6.1475E5        | 3        | 3                   | 516   | 526 |                                  |                                                                                 | PEAKS DB  |
| R.GYGLIFPGC(+57.02)PSTYEPAQQR.R.H                      | N    | 71.34  | 2629.2383 | 23     | 1.6  | 877.4214  | 3 | 34.78 | 2        | F2:1543  | OB5925 H3B raw.raw | 5.9452E5        | 2        | 2                   | 100   | 122 | Carbamidomethylation             | C10:Carbamidomethylation:1000.00                                                | PEAKS DB  |
| R.NALRRPFYSNAPQEIFIQQGR.G                              | N    | 68.46  | 2504.3037 | 21     | 1.1  | 835.7761  | 3 | 31.58 | 10       | F10:1548 | OB5937 H3A raw.raw | 9.3975E5        | 4        | 4                   | 79    | 99  |                                  |                                                                                 | PEAKS DB  |
| K.TANDLNLLILR.W                                        | N    | 67.99  | 1254.7296 | 11     | 0.0  | 628.3721  | 2 | 35.65 | 4        | F4:1764  | OB5931 H6 raw.raw  | 1.549E7         | 6        | 6                   | 377   | 387 |                                  |                                                                                 | PEAKS DB  |
| V.PQNFAVAGK.S                                          | N    | 67.74  | 930.4923  | 9      | 0.8  | 466.2538  | 2 | 32.44 | 5        | F5:1562  | OB5932 H2 raw.raw  | 4.3278E6        | 2        | 2                   | 449   | 457 |                                  |                                                                                 | PEAKS DB  |
| R.S(+57.02)PDIYNPQAGSLK.T                              | N    | 65.06  | 1445.7150 | 13     | 5.4  | 723.8687  | 2 | 28.54 | 6        | F6:1379  | OB5933 H2 raw.raw  | 8.1843E3        | 1        | 1                   | 364   | 376 |                                  | S1:Carbamidomethylation (DH KE, X@N-term):30.83                                 | PEAKS PTM |
| R.FNLAGNHEQEFLR.Y                                      | N    | 64.93  | 1573.7637 | 13     | 1.4  | 787.8902  | 2 | 30.26 | 11       | F11:1483 | OB5938 H3A raw.raw | 1.9024E5        | 5        | 5                   | 198   | 210 |                                  |                                                                                 | PEAKS DB  |
| R.ERAGQEEENE <sup>EGGN</sup> IFSGFTPEFLAQAFQVDDR.Q     | N    | 57.80  | 3586.6235 | 32     | 3.1  | 1196.5521 | 3 | 38.65 | 10       | F10:1961 | OB5937 H3A raw.raw | 5.3705E5        | 1        | 1                   | 248   | 279 |                                  |                                                                                 | PEAKS DB  |
| R.NALFVPH(+14.02)YNTNAHSIIYALR.G                       | N    | 55.85  | 2327.2175 | 20     | 0.3  | 776.7467  | 3 | 35.36 | 1        | F1:1633  | OB5921 H2 raw.raw  | 1.4175E5        | 1        | 1                   | 401   | 420 |                                  | H7:Methylation(others):18.00                                                    | PEAKS PTM |
| K.TAN(+.98)DLNLLILR.W                                  | N    | 54.07  | 1255.7136 | 11     | -1.0 | 628.8635  | 2 | 35.40 | 6        | F6:1771  | OB5933 H2 raw.raw  | 0               | 0        | 0                   | 377   | 387 | Deamidation (NQ)                 | N3:Deamidation (NQ):68.31                                                       | PEAKS DB  |
| R.AGQEEENE <sup>EGGN</sup> (+.98)IFSGFTPEFLAQAFQVDDR.Q | N    | 49.87  | 3302.4639 | 30     | 9.8  | 1652.2554 | 2 | 41.31 | 9        | F9:2094  | OB5936 H3A raw.raw | 2.3662E5        | 1        | 1                   | 250   | 279 |                                  | N11:Deamidation (NQ):38.03                                                      | PEAKS DB  |
| R.WLGLSAE(+53.92)YGNLYR.N                              | N    | 49.75  | 1594.6866 | 13     | 0.4  | 532.5697  | 3 | 34.87 | 5        | F5:1718  | OB5932 H2 raw.raw  | 1.8492E5        | 2        | 2                   | 388   | 400 | Replacement of 2 protons by iron | E7:Replacement of 2 protons by iron:156.85                                      | PEAKS PTM |
| K.TAND(+53.92)LNLLILR.W                                | N    | 47.26  | 1308.6488 | 11     | -1.1 | 655.3309  | 2 | 34.62 | 1        | F1:1597  | OB5921 H2 raw.raw  | 1.4902E5        | 1        | 1                   | 377   | 387 | Replacement of 2 protons by iron | D4:Replacement of 2 protons by iron:128.79                                      | PEAKS PTM |
| R.SLPSPY(+31.99)SPQSQPR.Q                              | N    | 46.01  | 1637.7686 | 14     | 1.0  | 819.8923  | 2 | 29.76 | 9        | F9:1401  | OB5936 H3A raw.raw | 3.8534E4        | 1        | 1                   | 219   | 232 |                                  | Y7:Dihydroxy:0.00                                                               | PEAKS PTM |
| R.QQPEENAC(+57.02)QFQR.L                               | N    | 45.72  | 1533.6630 | 12     | 1.7  | 767.8401  | 2 | 25.17 | 10       | F10:1164 | OB5937 H3A raw.raw | 6.6881E3        | 2        | 2                   | 26    | 37  | Carbamidomethylation             | C8:Carbamidomethylation:100.0.00                                                | PEAKS DB  |
| N.G(+57.02)IETIC(+57.02)TASVKK.N                       | N    | 44.25  | 1491.7603 | 13     | 1.2  | 746.8883  | 2 | 27.43 | 6        | F6:1293  | OB5933 H2 raw.raw  | 2.0504E4        | 1        | 1                   | 345   | 357 | Carbamidomethylation             | G1:Carbamidomethylation (DH KE, X@N-term):30.83;C7:Carbamidomethylation:1000.00 | PEAKS PTM |
| R.QLKNNNPFK.F                                          | N    | 41.09  | 1101.5930 | 9      | -0.6 | 551.8035  | 2 | 27.25 | 6        | F6:1282  | OB5933 H2 raw.raw  | 1.2465E4        | 2        | 2                   | 507   | 515 |                                  |                                                                                 | PEAKS DB  |
| R.FNLAGNH(+14.02)EQEFLR.Y                              | N    | 40.10  | 1587.7793 | 13     | 1.9  | 530.2681  | 3 | 32.39 | 9        | F9:1568  | OB5936 H3A raw.raw | 1.4807E5        | 2        | 2                   | 198   | 210 |                                  | H7:Methylation(others):33.98                                                    | PEAKS PTM |
| R.Q(-17.03)LKNNNPFK.F                                  | N    | 37.25  | 1084.5665 | 9      | 0.4  | 543.2908  | 2 | 28.36 | 6        | F6:1357  | OB5933 H2 raw.raw  | 1.237E4         | 1        | 1                   | 507   | 515 | Pyro-glu from Q                  | Q1:Pyro-glu from Q:1000.00                                                      | PEAKS PTM |
| R.N(+.98)ALFVPHYNTNAHSIIYALR.G                         | N    | 36.85  | 2314.1858 | 20     | 3.6  | 772.4053  | 3 | 45.28 | 6        | F6:2182  | OB5933 H2 raw.raw  | 6.3088E4        | 1        | 1                   | 401   | 420 |                                  | N1:Deamidation (NQ):32.94                                                       | PEAKS DB  |
| R.R(+14.02)FNLAGNHEQEFLR.Y                             | N    | 36.22  | 1743.8805 | 14     | -0.1 | 582.3007  | 3 | 32.19 | 9        | F9:1534  | OB5936 H3A raw.raw | 1.2906E6        | 2        | 2                   | 197   | 210 | Methylation(KR)                  | R1:Methylation(KR):67.11                                                        | PEAKS PTM |
| R.NALFVPH(+57.02)YNTNAHSIIYALR.G                       | N    | 32.65  | 2370.2231 | 20     | -0.3 | 791.0814  | 3 | 33.37 | 5        | F5:1616  | OB5932 H2 raw.raw  | 6.404E5         | 1        | 1                   | 401   | 420 |                                  | H7:Carbamidomethylation (DH KE, X@N-term):11.86                                 | PEAKS PTM |
| R.N(+57.02)ALFVPHYNTNAHSIIYALR.G                       | N    | 32.14  | 2370.2231 | 20     | -0.5 | 791.0812  | 3 | 33.18 | 6        | F6:1692  | OB5933 H2 raw.raw  | 7.1997E5        | 1        | 1                   | 401   | 420 |                                  | N1:Carbamidomethylation (DH KE, X@N-term):42.70                                 | PEAKS PTM |
| total 40 peptides                                      |      |        |           |        |      |           |   |       |          |          |                    |                 |          |                     |       |     |                                  |                                                                                 |           |



Protein Coverage:

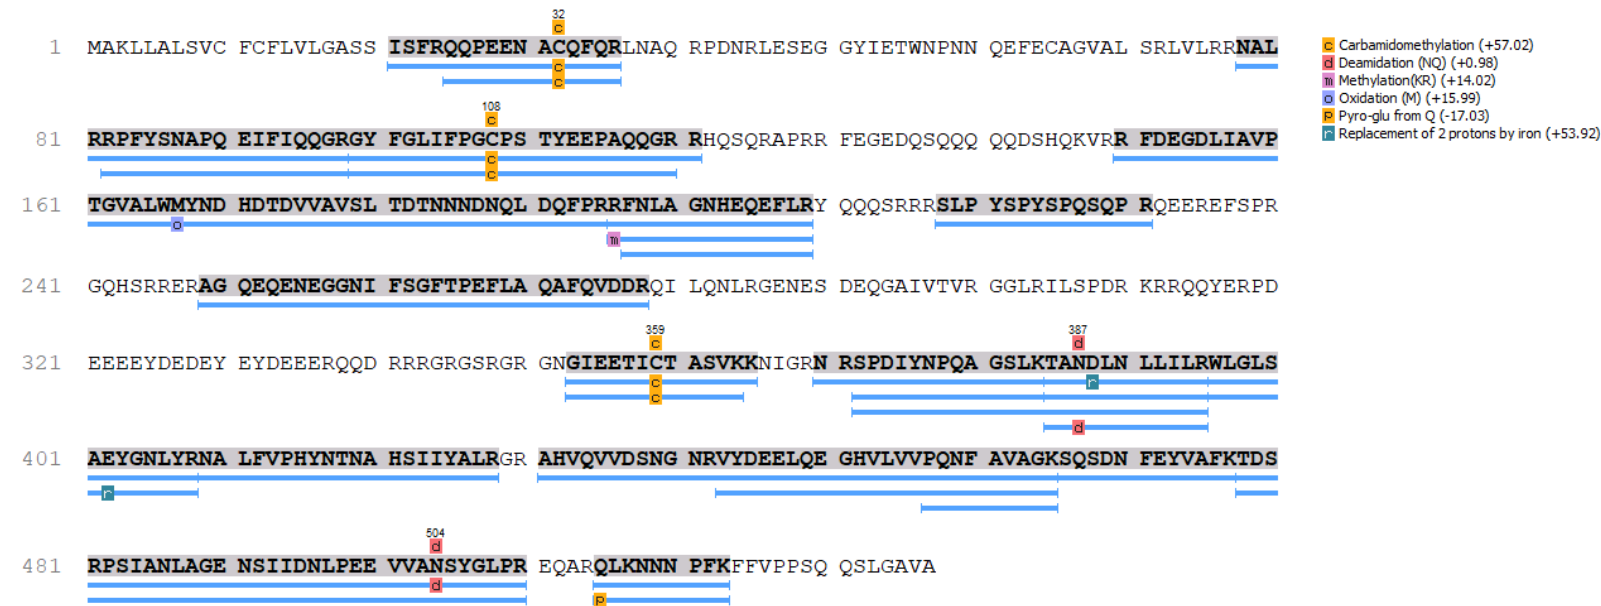

Supporting Peptides:

| Peptide                               | Uniq | -10lgP | Mass      | Length | ppm | m/z       | z | RT    | Fraction | Scan     | Source File        | Area Raw in gel | #Feature | #Feature Raw in gel | Start | End | PTM                  | AScore                           | Found By |
|---------------------------------------|------|--------|-----------|--------|-----|-----------|---|-------|----------|----------|--------------------|-----------------|----------|---------------------|-------|-----|----------------------|----------------------------------|----------|
| R.NALFVPHYNTNAHSIIYALR.G              | N    | 123.74 | 2313.2019 | 20     | 2.3 | 1157.6108 | 2 | 33.37 | 5        | F5:1607  | OB5932 H2 raw.raw  | 3.0421E7        | 13       | 12                  | 409   | 428 |                      |                                  | PEAKS DB |
| R.GYFGLIFPGC(+57.02)PSTYEPAQQGR.R     | N    | 122.36 | 2473.1372 | 22     | 3.9 | 1237.5807 | 2 | 36.47 | 2        | F2:1635  | OB5925 H3B raw.raw | 6.1209E5        | 7        | 7                   | 99    | 120 | Carbamidomethylation | C10:Carbamidomethylation:1000.00 | PEAKS DB |
| R.WLGLSAEYGNLYR.N                     | N    | 116.56 | 1540.7673 | 13     | 2.0 | 771.3925  | 2 | 34.87 | 5        | F5:1714  | OB5932 H2 raw.raw  | 3.9701E7        | 18       | 17                  | 396   | 408 |                      |                                  | PEAKS DB |
| K.TDSRPSIANLAGENSIIDNLPEEVVANSYGLPR.E | Y    | 111.57 | 3510.7590 | 33     | 3.0 | 1171.2638 | 3 | 37.25 | 5        | F5:1848  | OB5932 H2 raw.raw  | 7.7097E7        | 7        | 7                   | 478   | 510 |                      |                                  | PEAKS DB |
| R.NRSPDIYNPQAGSLK.T                   | N    | 110.81 | 1658.8376 | 15     | 0.4 | 830.4265  | 2 | 27.80 | 5        | F5:1285  | OB5932 H2 raw.raw  | 8.3597E5        | 6        | 6                   | 370   | 384 |                      |                                  | PEAKS DB |
| R.RPFYSNAPQEIFIQQGR.G                 | N    | 110.68 | 2050.0383 | 17     | 2.3 | 1026.0288 | 2 | 31.40 | 11       | F11:1547 | OB5938 H3A raw.raw | 1.6392E6        | 11       | 11                  | 82    | 98  |                      |                                  | PEAKS DB |
| K.SQSDNFEYVAFK.T                      | N    | 105.77 | 1433.6462 | 12     | 1.6 | 717.8315  | 2 | 31.87 | 5        | F5:1530  | OB5932 H2 raw.raw  | 4.4734E6        | 3        | 3                   | 466   | 477 |                      |                                  | PEAKS DB |
| R.VYDEELQEGHVLVVPQNFAVAGK.S           | N    | 103.27 | 2540.2910 | 23     | 2.1 | 847.7727  | 3 | 32.93 | 1        | F1:1498  | OB5921 H2 raw.raw  | 1.5993E6        | 6        | 6                   | 443   | 465 |                      |                                  | PEAKS DB |
| R.RFNLAGNHEQEFLR.Y                    | N    | 100.69 | 1729.8647 | 14     | 1.5 | 577.6297  | 3 | 30.08 | 10       | F10:1438 | OB5937 H3A raw.raw | 6.1619E6        | 6        | 6                   | 196   | 209 |                      |                                  | PEAKS DB |
| total 42 peptides                     |      |        |           |        |     |           |   |       |          |          |                    |                 |          |                     |       |     |                      |                                  |          |

| Peptide                                     | Uniq | -10lgP | Mass      | Length | ppm | m/z       | z | RT    | Fraction | Scan     | Source File        | Area Raw in gel | #Feature | #Feature Raw in gel | Start | End | PTM                  | AScore                                         | Found By  |
|---------------------------------------------|------|--------|-----------|--------|-----|-----------|---|-------|----------|----------|--------------------|-----------------|----------|---------------------|-------|-----|----------------------|------------------------------------------------|-----------|
| K.TDSRPSIANLAGENSIIDNLPeeVVAN(+.98)SYGLPR.E | Y    | 96.26  | 3511.7429 | 33     | 8.9 | 1171.5986 | 3 | 36.51 | 5        | F5:1811  | OB5932 H2 raw.raw  | 2.8767E6        | 1        | 1                   | 478   | 510 | Deamidation (NQ)     | N27:Deamidation (NQ):131.72                    | PEAKS DB  |
| R.SPDIYNPQAGSLK.T                           | N    | 87.71  | 1388.6936 | 13     | 2.2 | 695.3556  | 2 | 28.73 | 5        | F5:1375  | OB5932 H2 raw.raw  | 1.3705E6        | 3        | 3                   | 372   | 384 |                      |                                                | PEAKS DB  |
| N.GIEETIC(+57.02)TASVK.K                    | N    | 85.93  | 1306.6438 | 12     | 1.2 | 654.3300  | 2 | 29.09 | 5        | F5:1373  | OB5932 H2 raw.raw  | 2.32E5          | 2        | 2                   | 353   | 364 | Carbamidomethylation | C7:Carbamidomethylation:100.00                 | PEAKS DB  |
| R.AGQ(+.98)EQENEGGNIFSGFTPEFLAQAFQVDDR.Q    | N    | 84.98  | 3301.4800 | 30     | 5.9 | 1651.7571 | 2 | 39.98 | 10       | F10:2041 | OB5937 H3A raw.raw | 3.2739E5        | 1        | 1                   | 249   | 278 |                      | Q3:Deamidation (NQ):14.04                      | PEAKS DB  |
| K.TDSRPSIANLAGENSIIDN(+.98)LPEEVVANSYGLPR.E | Y    | 83.96  | 3511.7429 | 33     | 8.7 | 1171.5984 | 3 | 37.04 | 1        | F1:1738  | OB5921 H2 raw.raw  | 2.9292E6        | 2        | 2                   | 478   | 510 |                      | N19:Deamidation (NQ):28.20                     | PEAKS DB  |
| R.SPDIYNPQAGSLKTANDLNLLILR.W                | N    | 81.29  | 2625.4126 | 24     | 0.2 | 876.1450  | 3 | 35.24 | 5        | F5:1743  | OB5932 H2 raw.raw  | 1.5604E5        | 1        | 1                   | 372   | 395 |                      |                                                | PEAKS DB  |
| S.ISFRQQPEENAC(+57.02)QFQR.L                | N    | 79.32  | 2036.9486 | 16     | 0.8 | 679.9907  | 3 | 27.97 | 11       | F11:1335 | OB5938 H3A raw.raw | 1.7296E5        | 3        | 3                   | 21    | 36  | Carbamidomethylation | C12:Carbamidomethylation:100.00                | PEAKS DB  |
| R.AGQEQENEGGNIFSGFTPEFLAQAFQVDDR.Q          | N    | 72.48  | 3300.4958 | 30     | 2.5 | 1651.2593 | 2 | 39.97 | 11       | F11:2048 | OB5938 H3A raw.raw | 0               | 0        | 0                   | 249   | 278 |                      |                                                | PEAKS DB  |
| R.AHVQVDSNGNRVYDEELQEGHVLVVPQNFAVAGK.S      | N    | 72.39  | 3816.9182 | 35     | 3.0 | 1273.3171 | 3 | 32.25 | 5        | F5:1561  | OB5932 H2 raw.raw  | 3.9867E6        | 2        | 2                   | 431   | 465 |                      |                                                | PEAKS DB  |
| N.GIEETIC(+57.02)TASVKK.N                   | N    | 72.27  | 1434.7388 | 13     | 1.2 | 718.3775  | 2 | 27.26 | 5        | F5:1253  | OB5932 H2 raw.raw  | 2.7175E5        | 3        | 3                   | 353   | 365 | Carbamidomethylation | C7:Carbamidomethylation:100.00                 | PEAKS DB  |
| R.GYFGLIFPGC(+57.02)PSTYEPAQQGRR.H          | N    | 71.34  | 2629.2383 | 23     | 1.6 | 877.4214  | 3 | 34.78 | 2        | F2:1543  | OB5925 H3B raw.raw | 5.9452E5        | 2        | 2                   | 99    | 121 | Carbamidomethylation | C10:Carbamidomethylation:100.00                | PEAKS DB  |
| R.NALRRPFYSNAPQEIFIQQR.G                    | N    | 68.46  | 2504.3037 | 21     | 1.1 | 835.7761  | 3 | 31.58 | 10       | F10:1548 | OB5937 H3A raw.raw | 9.3975E5        | 4        | 4                   | 78    | 98  |                      |                                                | PEAKS DB  |
| K.TANDLNLLILR.W                             | N    | 67.99  | 1254.7296 | 11     | 0.0 | 628.3721  | 2 | 35.65 | 4        | F4:1764  | OB5931 H6 raw.raw  | 1.549E7         | 6        | 6                   | 385   | 395 |                      |                                                | PEAKS DB  |
| V.PQNFAVAGK.S                               | N    | 67.74  | 930.4923  | 9      | 0.8 | 466.2538  | 2 | 32.44 | 5        | F5:1562  | OB5932 H2 raw.raw  | 4.3278E6        | 2        | 2                   | 457   | 465 |                      |                                                | PEAKS DB  |
| R.S(+57.02)PDIYNPQAGSLK.T                   | N    | 65.06  | 1445.7150 | 13     | 5.4 | 723.8687  | 2 | 28.54 | 6        | F6:1379  | OB5933 H2 raw.raw  | 8.1843E3        | 1        | 1                   | 372   | 384 |                      | S1:Carbamidomethylation (DHKE, X@N-term):30.83 | PEAKS PTM |
| R.FNLAGNHEQEFLR.Y                           | N    | 64.93  | 1573.7637 | 13     | 1.4 | 787.8902  | 2 | 30.26 | 11       | F11:1483 | OB5938 H3A raw.raw | 1.9024E5        | 5        | 5                   | 197   | 209 |                      |                                                | PEAKS DB  |
| R.NALFVPH(+14.02)YNTNAHSIIYALR.G            | N    | 55.85  | 2327.2175 | 20     | 0.3 | 776.7467  | 3 | 35.36 | 1        | F1:1633  | OB5921 H2 raw.raw  | 1.4175E5        | 1        | 1                   | 409   | 428 |                      | H7:Met hylation (others):18.00                 | PEAKS PTM |
| total 42 peptides                           |      |        |           |        |     |           |   |       |          |          |                    |                 |          |                     |       |     |                      |                                                |           |

| Peptide                                                             | Uniq | -10lgP | Mass      | Length | ppm  | m/z       | z | RT    | Fraction | Scan     | Source File        | Area Raw in gel | #Feature | #Feature Raw in gel | Start | End | PTM                              | AScore                                                                           | Found By  |
|---------------------------------------------------------------------|------|--------|-----------|--------|------|-----------|---|-------|----------|----------|--------------------|-----------------|----------|---------------------|-------|-----|----------------------------------|----------------------------------------------------------------------------------|-----------|
| K.TAN(+.98)DLNLLILR.W                                               | N    | 54.07  | 1255.7136 | 11     | -1.0 | 628.8635  | 2 | 35.40 | 6        | F6:1771  | OB5933 H2 raw.raw  | 0               | 0        | 0                   | 385   | 395 | Deamidation (NQ)                 | N3:Deamidation (NQ):68.31                                                        | PEAKS DB  |
| R.WLGSAE(+53.92)YGNLYR.N                                            | N    | 49.75  | 1594.6866 | 13     | 0.4  | 532.5697  | 3 | 34.87 | 5        | F5:1718  | OB5932 H2 raw.raw  | 1.8492E5        | 2        | 2                   | 396   | 408 | Replacement of 2 protons by iron | E7:Replacement of 2 protons by iron:156.85                                       | PEAKS PTM |
| K.TAND(+53.92)LNLLILR.W                                             | N    | 47.26  | 1308.6488 | 11     | -1.1 | 655.3309  | 2 | 34.62 | 1        | F1:1597  | OB5921 H2 raw.raw  | 1.4902E5        | 1        | 1                   | 385   | 395 | Replacement of 2 protons by iron | D4:Replacement of 2 protons by iron:128.79                                       | PEAKS PTM |
| R.SLPYSPY(+31.99)SPQSQPR.Q                                          | N    | 46.01  | 1637.7686 | 14     | 1.0  | 819.8923  | 2 | 29.76 | 9        | F9:1401  | OB5936 H3A raw.raw | 3.8534E4        | 1        | 1                   | 218   | 231 |                                  | Y7:Dihydroxy:0.00                                                                | PEAKS PTM |
| R.QQPEENAC(+57.02)QFQR.L                                            | N    | 45.72  | 1533.6630 | 12     | 1.7  | 767.8401  | 2 | 25.17 | 10       | F10:1164 | OB5937 H3A raw.raw | 6.6881E3        | 2        | 2                   | 25    | 36  | Carbamidomethylation             | C8:Carbamidomethylation:1000.00                                                  | PEAKS DB  |
| N.G(+57.02)IETIC(+57.02)TASVKK.N                                    | N    | 44.25  | 1491.7603 | 13     | 1.2  | 746.8883  | 2 | 27.43 | 6        | F6:1293  | OB5933 H2 raw.raw  | 2.0504E4        | 1        | 1                   | 353   | 365 | Carbamidomethylation             | G1:Carbamidomethylation (D HKE, X @N-term):30.83;C7:Carbamidomethylation:1000.00 | PEAKS PTM |
| R.QLKNNNPFK.F                                                       | N    | 41.09  | 1101.5930 | 9      | -0.6 | 551.8035  | 2 | 27.25 | 6        | F6:1282  | OB5933 H2 raw.raw  | 1.2465E4        | 2        | 2                   | 515   | 523 |                                  |                                                                                  | PEAKS DB  |
| K.TDSRPSIANLAGEN(+.98)SIIDNLPeeVVANSYGLPR.E                         | Y    | 40.49  | 3511.7429 | 33     | 8.7  | 1171.5984 | 3 | 37.04 | 1        | F1:1887  | OB5921 H2 raw.raw  | 2.8767E6        | 1        | 1                   | 478   | 510 |                                  | N14:Deamidation (NQ):10.19                                                       | PEAKS DB  |
| R.FNLAGNH(+14.02)EQEFLR.Y                                           | N    | 40.10  | 1587.7793 | 13     | 1.9  | 530.2681  | 3 | 32.39 | 9        | F9:1568  | OB5936 H3A raw.raw | 1.4807E5        | 2        | 2                   | 197   | 209 |                                  | H7:Methylation (others):33.98                                                    | PEAKS PTM |
| R.RFDEGDLIAVPTGVALWM(+15.99)YN(+.98)DHDTDVAVSLDTNNDNQ(+.98)LDQFPR.R | Y    | 37.42  | 5208.3892 | 46     | 8.7  | 1737.1521 | 3 | 38.89 | 9        | F9:1958  | OB5936 H3A raw.raw | 1.266E5         | 1        | 1                   | 150   | 195 | Oxidation (M)                    | M18:Oxidation (M):1000.00;N20:Deamidation (NQ):12.67;Q40:Deamidation (NQ):0.00   | PEAKS DB  |
| R.Q(-17.03)LKNNNPFK.F                                               | N    | 37.25  | 1084.5665 | 9      | 0.4  | 543.2908  | 2 | 28.36 | 6        | F6:1357  | OB5933 H2 raw.raw  | 1.237E4         | 1        | 1                   | 515   | 523 | Pyro-glu from Q                  | Q1:Pyro-glu from Q:1000.00                                                       | PEAKS PTM |
| R.N(+.98)ALFVPHYNTNAHSIIYALR.G                                      | N    | 36.85  | 2314.1858 | 20     | 3.6  | 772.4053  | 3 | 45.28 | 6        | F6:2182  | OB5933 H2 raw.raw  | 6.3088E4        | 1        | 1                   | 409   | 428 |                                  | N1:Deamidation (NQ):32.94                                                        | PEAKS DB  |
| R.R(+14.02)FNLAGNHEQEFLR.Y                                          | N    | 36.22  | 1743.8805 | 14     | -0.1 | 582.3007  | 3 | 32.19 | 9        | F9:1534  | OB5936 H3A raw.raw | 1.2906E6        | 2        | 2                   | 196   | 209 | Methylation(KR)                  | R1:Methylation (KR):67.11                                                        | PEAKS PTM |
| total 42 peptides                                                   |      |        |           |        |      |           |   |       |          |          |                    |                 |          |                     |       |     |                                  |                                                                                  |           |

T2B9M0|T2B9M0\_ARAHY [back to list](#)

### Protein Coverage:

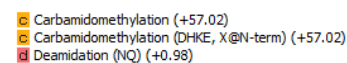

### Supporting Peptides:

**total 36 peptides**

| Peptide                                        | Uniq | -10lgP | Mass      | Length | ppm  | m/z       | z | RT    | Fraction | Scan     | Source File              | Area Raw in gel | #Feature | #Feature Raw in gel | Start | End | PTM                                       | AScore                                                    | Found By    |
|------------------------------------------------|------|--------|-----------|--------|------|-----------|---|-------|----------|----------|--------------------------|-----------------|----------|---------------------|-------|-----|-------------------------------------------|-----------------------------------------------------------|-------------|
| K.GILAADESTGTIGKR.L                            | Y    | 105.73 | 1487.7943 | 15     | 0.0  | 744.9044  | 2 | 27.45 | 11       | F11:1307 | OB5938<br>H3A<br>raw.raw | 3.9441E5        | 4        | 4                   | 25    | 39  |                                           |                                                           | PEAKS<br>DB |
| K.EGGVLPGIKVDKGTVELAGTNGETTTQGLDGLGQR.C        | Y    | 102.77 | 3466.7903 | 35     | 2.3  | 1156.6067 | 3 | 32.71 | 10       | F10:1614 | OB5937<br>H3A<br>raw.raw | 1.4131E6        | 3        | 3                   | 95    | 129 |                                           |                                                           | PEAKS<br>DB |
| R.YAAIC(+57.02)QENGLVPIVEPEILVDGPHDIHK.C       | Y    | 102.48 | 3125.5854 | 28     | -2.1 | 1042.8669 | 3 | 34.56 | 11       | F11:1733 | OB5938<br>H3A<br>raw.raw | 7.5947E6        | 3        | 3                   | 169   | 196 | Carbamidomethylation                      | C5:Carbamidomethylation:1000.00                           | PEAKS<br>DB |
| R.YAAIC(+57.02)QEN(+.98)GLVPIVEPEILVDGPHDIHK.C | Y    | 101.70 | 3126.5696 | 28     | 3.9  | 1043.2012 | 3 | 34.93 | 10       | F10:1744 | OB5937<br>H3A<br>raw.raw | 0               | 0        | 0                   | 169   | 196 | Carbamidomethylation;<br>Deamidation (NQ) | C5:Carbamidomethylation:1000.00;N8:Deamidation (NQ):52.04 | PEAKS<br>DB |
| K.GKKPWSLSFSFGR.A                              | Y    | 99.46  | 1495.7936 | 13     | -0.2 | 499.6050  | 3 | 32.14 | 11       | F11:1581 | OB5938<br>H3A<br>raw.raw | 4.526E6         | 6        | 6                   | 286   | 298 |                                           |                                                           | PEAKS<br>DB |
| K.KPWLSLSFSFGR.A                               | Y    | 99.06  | 1310.6771 | 11     | 0.5  | 656.3462  | 2 | 33.46 | 10       | F10:1658 | OB5937<br>H3A<br>raw.raw | 6.1097E5        | 2        | 2                   | 288   | 298 |                                           |                                                           | PEAKS<br>DB |
| K.SKYHDELIANAAYIGTPGK.G                        | Y    | 98.40  | 2047.0374 | 19     | 1.6  | 683.3541  | 3 | 29.90 | 10       | F10:1442 | OB5937<br>H3A<br>raw.raw | 3.3341E5        | 4        | 4                   | 6     | 24  |                                           |                                                           | PEAKS<br>DB |
| K.YHDELIANAAYIGTPGK.G                          | Y    | 93.53  | 1831.9104 | 17     | 1.7  | 916.9640  | 2 | 30.83 | 10       | F10:1510 | OB5937<br>H3A<br>raw.raw | 6.0481E4        | 1        | 1                   | 8     | 24  |                                           |                                                           | PEAKS<br>DB |
| K.ANSEATLGTYKGSANLGEASESLHVK.D                 | Y    | 91.88  | 2690.3147 | 27     | 1.6  | 897.7803  | 3 | 28.95 | 10       | F10:1392 | OB5937<br>H3A<br>raw.raw | 1.356E5         | 2        | 2                   | 328   | 354 |                                           |                                                           | PEAKS<br>DB |
| K.VDKGTVELAGTNGETTTQGLDGLGQR.C                 | Y    | 90.53  | 2616.2991 | 26     | 0.9  | 873.1078  | 3 | 29.90 | 11       | F11:1453 | OB5938<br>H3A<br>raw.raw | 6.3702E4        | 2        | 2                   | 104   | 129 |                                           |                                                           | PEAKS<br>DB |
| K.VAPEVVAEHTVR.A                               | Y    | 88.35  | 1305.7041 | 12     | 0.4  | 653.8596  | 2 | 26.96 | 10       | F10:1262 | OB5937<br>H3A<br>raw.raw | 3.6523E5        | 5        | 5                   | 238   | 249 |                                           |                                                           | PEAKS<br>DB |
| K.GILAADESTGTIGK.R                             | Y    | 88.05  | 1331.6932 | 14     | 0.1  | 666.8539  | 2 | 31.07 | 9        | F9:1493  | OB5936<br>H3A<br>raw.raw | 2.8213E4        | 2        | 2                   | 25    | 38  |                                           |                                                           | PEAKS<br>DB |
| R.LSSINVENVETNR.R                              | Y    | 85.55  | 1473.7423 | 13     | 0.1  | 737.8785  | 2 | 28.57 | 11       | F11:1381 | OB5938<br>H3A<br>raw.raw | 1.8416E5        | 3        | 3                   | 40    | 52  |                                           |                                                           | PEAKS<br>DB |
| K.ALNDHHVLLLEGTLKPNMVTGPSDSAK.V                | Y    | 80.11  | 2856.4802 | 27     | 0.9  | 953.1682  | 3 | 31.77 | 10       | F10:1566 | OB5937<br>H3A<br>raw.raw | 2.319E5         | 1        | 1                   | 211   | 237 |                                           |                                                           | PEAKS<br>DB |
| K.AQEAFLTR.A                                   | Y    | 73.62  | 934.4872  | 8      | 0.9  | 468.2513  | 2 | 27.27 | 10       | F10:1294 | OB5937<br>H3A<br>raw.raw | 1.5187E5        | 3        | 3                   | 318   | 325 |                                           |                                                           | PEAKS<br>DB |
| K.ANSEATLGTYK.G                                | Y    | 73.46  | 1153.5615 | 11     | 1.6  | 577.7889  | 2 | 25.17 | 11       | F11:1176 | OB5938<br>H3A<br>raw.raw | 6.2011E3        | 2        | 2                   | 328   | 338 |                                           |                                                           | PEAKS<br>DB |
| K.GSANLGEASESLHVKDYKY                          | Y    | 73.40  | 2124.0122 | 20     | 2.8  | 709.0133  | 3 | 31.07 | 9        | F9:1488  | OB5936<br>H3A<br>raw.raw | 1.9959E6        | 6        | 6                   | 339   | 358 |                                           |                                                           | PEAKS<br>DB |
| K.GSANLGEASESLHVK.D                            | Y    | 68.29  | 1554.7638 | 16     | 0.0  | 778.3892  | 2 | 26.95 | 10       | F10:1269 | OB5937<br>H3A<br>raw.raw | 1.9867E4        | 3        | 3                   | 339   | 354 |                                           |                                                           | PEAKS<br>DB |
| R.AKANSEATLGTYK.G                              | Y    | 64.49  | 1352.6936 | 13     | -0.3 | 677.3539  | 2 | 27.72 | 9        | F9:1294  | OB5936<br>H3A<br>raw.raw | 8.8393E3        | 3        | 3                   | 326   | 338 |                                           |                                                           | PEAKS<br>DB |
| K.EGGVLPGIKVDK.G                               | Y    | 63.82  | 1210.6921 | 12     | 0.3  | 606.3535  | 2 | 28.10 | 11       | F11:1351 | OB5938<br>H3A<br>raw.raw | 9.8645E4        | 3        | 3                   | 95    | 106 |                                           |                                                           | PEAKS<br>DB |
| V.PIVEPEILVDGPHDIHK.C                          | Y    | 63.73  | 1907.0151 | 17     | 2.3  | 954.5170  | 2 | 34.91 | 10       | F10:1729 | OB5937<br>H3A<br>raw.raw | 4.6955E6        | 2        | 2                   | 180   | 196 |                                           |                                                           | PEAKS<br>DB |
| K.KAQEAFLTR.A                                  | Y    | 60.63  | 1062.5822 | 9      | 0.9  | 532.2988  | 2 | 26.54 | 11       | F11:1258 | OB5938<br>H3A<br>raw.raw | 1.0907E4        | 3        | 3                   | 317   | 325 |                                           |                                                           | PEAKS<br>DB |
| K.VDKGTVELAGTNGETTTQ(+.98)GLDGLGQR.C           | Y    | 54.47  | 2617.2830 | 26     | 1.5  | 873.4363  | 3 | 30.46 | 10       | F10:1482 | OB5937<br>H3A<br>raw.raw | 1.4142E5        | 1        | 1                   | 104   | 129 |                                           | Q18:Deamidation (NQ):<br>0.00                             | PEAKS<br>DB |
| total 36 peptides                              |      |        |           |        |      |           |   |       |          |          |                          |                 |          |                     |       |     |                                           |                                                           |             |

| Peptide                              | Uniq | -10lgP | Mass      | Length | ppm | m/z      | z | RT    | Fraction | Scan     | Source File        | Area Raw in gel | #Feature | #Feature Raw in gel | Start | End | PTM                                   | AScore                                          | Found By  |
|--------------------------------------|------|--------|-----------|--------|-----|----------|---|-------|----------|----------|--------------------|-----------------|----------|---------------------|-------|-----|---------------------------------------|-------------------------------------------------|-----------|
| K.VDKGTVELAGTN(+.98)GETTTQGLDGLGQR.C | Y    | 52.32  | 2617.2830 | 26     | 1.4 | 873.4362 | 3 | 32.69 | 9        | F9:1582  | OB5936 H3A raw.raw | 1.5447E5        | 1        | 1                   | 104   | 129 |                                       | N12:Deamidation (NQ): 41.57                     | PEAKS DB  |
| R.AKANSEATLGTYKGSANLGEASESLHVK.D     | Y    | 52.05  | 2889.4468 | 29     | 0.7 | 723.3695 | 4 | 28.76 | 10       | F10:1381 | OB5937 H3A raw.raw | 1.2842E5        | 2        | 2                   | 326   | 354 |                                       |                                                 | PEAKS DB  |
| R.LSSINVENVETNRR.A                   | Y    | 47.58  | 1629.8434 | 14     | 1.7 | 544.2893 | 3 | 27.29 | 10       | F10:1293 | OB5937 H3A raw.raw | 1.9075E5        | 1        | 1                   | 40    | 53  |                                       |                                                 | PEAKS DB  |
| R.VLAAC(+57.02)YK.A                  | Y    | 44.14  | 823.4262  | 7      | 1.2 | 412.7209 | 2 | 24.59 | 11       | F11:1143 | OB5938 H3A raw.raw | 8.3473E3        | 2        | 2                   | 204   | 210 | Carbamidomethylation                  | C5:Carbamidomethylation:1000.00                 | PEAKS DB  |
| K.G(+57.02)ILAADESTGTIGKR.L          | Y    | 43.80  | 1544.8158 | 15     | 3.9 | 773.4182 | 2 | 27.74 | 11       | F11:1329 | OB5938 H3A raw.raw | 0               | 0        | 0                   | 25    | 39  | Carbamidomethylation (DHKE, X@N-term) | G1:Carbamidomethylation (DHKE, X@N-term): 61.30 | PEAKS PTM |
| K.RLSSINVENVETNRR.A                  | Y    | 42.99  | 1785.9446 | 15     | 0.4 | 596.3224 | 3 | 27.45 | 11       | F11:1317 | OB5938 H3A raw.raw | 1.6138E4        | 2        | 2                   | 39    | 53  |                                       |                                                 | PEAKS DB  |
| A.PEVVAEHTVR.A                       | Y    | 40.67  | 1135.5985 | 10     | 0.5 | 568.8068 | 2 | 27.03 | 10       | F10:1276 | OB5937 H3A raw.raw | 2.1131E3        | 1        | 1                   | 240   | 249 |                                       |                                                 | PEAKS DB  |
| R.LS(-15.99)SINVENVETNRR.A           | Y    | 34.15  | 1613.8485 | 14     | 0.0 | 538.9568 | 3 | 29.95 | 9        | F9:1425  | OB5936 H3A raw.raw | 1.6662E4        | 1        | 1                   | 40    | 53  |                                       | S2:Deoxy:40.00                                  | PEAKS PTM |
| K.V(+57.02)APEVVAEHTVR.A             | Y    | 33.55  | 1362.7256 | 12     | 3.0 | 682.3721 | 2 | 27.40 | 10       | F10:1299 | OB5937 H3A raw.raw | 0               | 0        | 0                   | 238   | 249 |                                       | V1:Carbamidomethylation (DHKE, X@N-term): 22.45 | PEAKS PTM |
| total 36 peptides                    |      |        |           |        |     |          |   |       |          |          |                    |                 |          |                     |       |     |                                       |                                                 |           |

Q5I6T2|Q5I6T2\_ARAHY

back to list

| Protein Coverage | Supporting Peptides |

Protein Coverage:

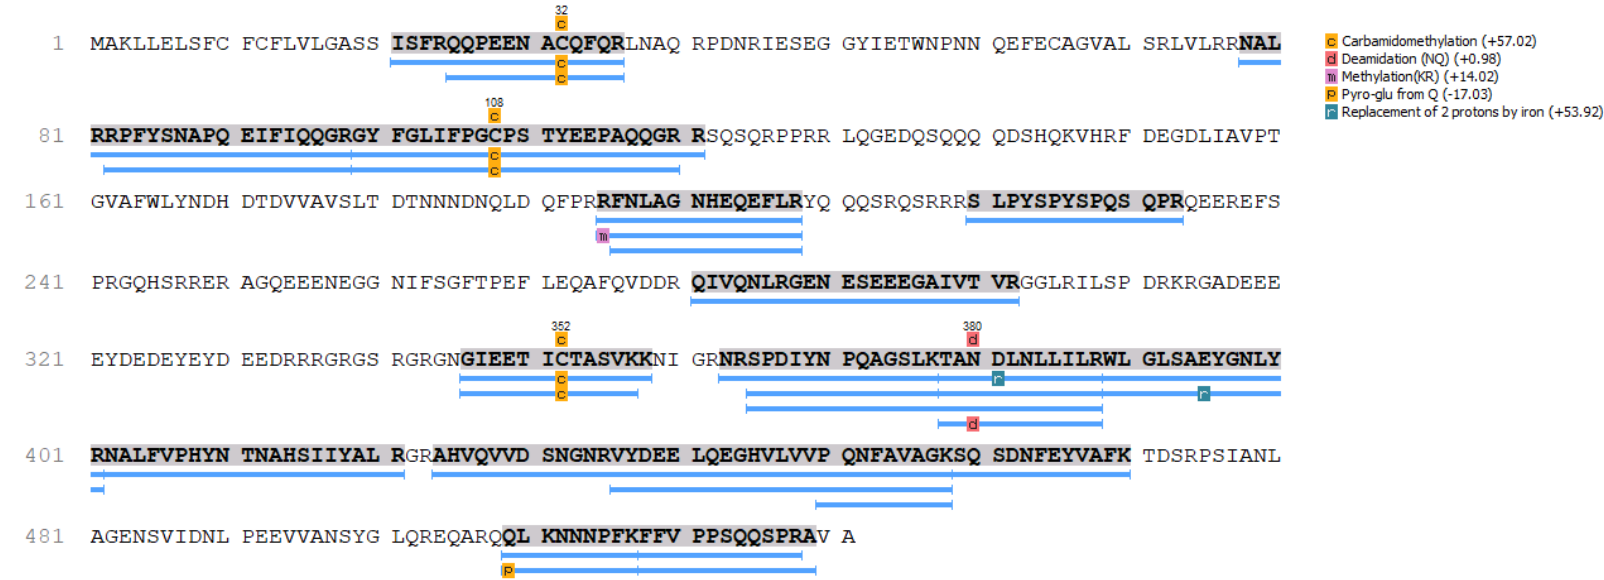

Supporting Peptides:

| Peptide           | Uniq | -10lgP | Mass | Length | ppm | m/z | z | RT | Fraction | Scan | Source File | Area Raw in gel | #Feature | #Feature Raw in gel | Start | End | PTM | AScore | Found By |
|-------------------|------|--------|------|--------|-----|-----|---|----|----------|------|-------------|-----------------|----------|---------------------|-------|-----|-----|--------|----------|
| total 37 peptides |      |        |      |        |     |     |   |    |          |      |             |                 |          |                     |       |     |     |        |          |

| Peptide                                  | Uniq | -10lgP | Mass      | Length | ppm  | m/z       | z | RT    | Fraction | Scan     | Source File        | Area Raw in gel | #Feature | #Feature Raw in gel | Start | End | PTM                              | AScore                                                                          | Found By  |
|------------------------------------------|------|--------|-----------|--------|------|-----------|---|-------|----------|----------|--------------------|-----------------|----------|---------------------|-------|-----|----------------------------------|---------------------------------------------------------------------------------|-----------|
| R.NALFVPHYNTNAHSIIYALR.G                 | N    | 123.74 | 2313.2019 | 20     | 2.3  | 1157.6108 | 2 | 33.37 | 5        | F5:1607  | OB5932 H2 raw.raw  | 3.0421E7        | 13       | 12                  | 402   | 421 |                                  |                                                                                 | PEAKS DB  |
| R.GYGLIFPGC(+57.02)PSTYEPAQQGR.R         | N    | 122.36 | 2473.1372 | 22     | 3.9  | 1237.5807 | 2 | 36.47 | 2        | F2:1635  | OB5925 H3B raw.raw | 6.1209E5        | 7        | 7                   | 99    | 120 | Carbamidomethylation             | C10:Carbamidomethylation:1000.00                                                | PEAKS DB  |
| R.WLGLSAEYGNLYR.N                        | N    | 116.56 | 1540.7673 | 13     | 2.0  | 771.3925  | 2 | 34.87 | 5        | F5:1714  | OB5932 H2 raw.raw  | 3.9701E7        | 18       | 17                  | 389   | 401 |                                  |                                                                                 | PEAKS DB  |
| R.NRSPDIYNPQAGSLK.T                      | N    | 110.81 | 1658.8376 | 15     | 0.4  | 830.4265  | 2 | 27.80 | 5        | F5:1285  | OB5932 H2 raw.raw  | 8.3597E5        | 6        | 6                   | 363   | 377 |                                  |                                                                                 | PEAKS DB  |
| R.RPFYSNAPQEIFIQQGR.G                    | N    | 110.68 | 2050.0383 | 17     | 2.3  | 1026.0288 | 2 | 31.40 | 11       | F11:1547 | OB5938 H3A raw.raw | 1.6392E6        | 11       | 11                  | 82    | 98  |                                  |                                                                                 | PEAKS DB  |
| K.SQSDNFEYVAFK.T                         | N    | 105.77 | 1433.6462 | 12     | 1.6  | 717.8315  | 2 | 31.87 | 5        | F5:1530  | OB5932 H2 raw.raw  | 4.4734E6        | 3        | 3                   | 459   | 470 |                                  |                                                                                 | PEAKS DB  |
| R.VYDEELQEGHVLVVPQNFAVAGK.S              | N    | 103.27 | 2540.2910 | 23     | 2.1  | 847.7727  | 3 | 32.93 | 1        | F1:1498  | OB5921 H2 raw.raw  | 1.5993E6        | 6        | 6                   | 436   | 458 |                                  |                                                                                 | PEAKS DB  |
| R.RFNLAGNHEQEFLR.Y                       | N    | 100.69 | 1729.8647 | 14     | 1.5  | 577.6297  | 3 | 30.08 | 10       | F10:1438 | OB5937 H3A raw.raw | 6.1619E6        | 6        | 6                   | 195   | 208 |                                  |                                                                                 | PEAKS DB  |
| R.SPDIYNPQAGSLK.T                        | N    | 87.71  | 1388.6936 | 13     | 2.2  | 695.3556  | 2 | 28.73 | 5        | F5:1375  | OB5932 H2 raw.raw  | 1.3705E6        | 3        | 3                   | 365   | 377 |                                  |                                                                                 | PEAKS DB  |
| N.GIEETIC(+57.02)TASVK.K                 | N    | 85.93  | 1306.6438 | 12     | 1.2  | 654.3300  | 2 | 29.09 | 5        | F5:1373  | OB5932 H2 raw.raw  | 2.32E5          | 2        | 2                   | 346   | 357 | Carbamidomethylation             | C7:Carbamidomethylation:1000.00                                                 | PEAKS DB  |
| R.SPDIYNPQAGSLKTANDLNLLILR.W             | N    | 81.29  | 2625.4126 | 24     | 0.2  | 876.1450  | 3 | 35.24 | 5        | F5:1743  | OB5932 H2 raw.raw  | 1.5604E5        | 1        | 1                   | 365   | 388 |                                  |                                                                                 | PEAKS DB  |
| S.ISFRQQPEENAC(+57.02)QFQR.L             | N    | 79.32  | 2036.9486 | 16     | 0.8  | 679.9907  | 3 | 27.97 | 11       | F11:1335 | OB5938 H3A raw.raw | 1.7296E5        | 3        | 3                   | 21    | 36  | Carbamidomethylation             | C12:Carbamidomethylation:1000.00                                                | PEAKS DB  |
| R.AHVQVVDSSNGNRVYDEELQEGHVLVVPQNFAVAGK.S | N    | 72.39  | 3816.9182 | 35     | 3.0  | 1273.3171 | 3 | 32.25 | 5        | F5:1561  | OB5932 H2 raw.raw  | 3.9867E6        | 2        | 2                   | 424   | 458 |                                  |                                                                                 | PEAKS DB  |
| N.GIEETIC(+57.02)TASVKK.N                | N    | 72.27  | 1434.7388 | 13     | 1.2  | 718.3775  | 2 | 27.26 | 5        | F5:1253  | OB5932 H2 raw.raw  | 2.7175E5        | 3        | 3                   | 346   | 358 | Carbamidomethylation             | C7:Carbamidomethylation:1000.00                                                 | PEAKS DB  |
| R.GYGLIFPGC(+57.02)PSTYEPAQQGRR.S        | N    | 71.34  | 2629.2383 | 23     | 1.6  | 877.4214  | 3 | 34.78 | 2        | F2:1543  | OB5925 H3B raw.raw | 5.9452E5        | 2        | 2                   | 99    | 121 | Carbamidomethylation             | C10:Carbamidomethylation:1000.00                                                | PEAKS DB  |
| R.NALRRPFYSNAPQEIFIQQGR.G                | N    | 68.46  | 2504.3037 | 21     | 1.1  | 835.7761  | 3 | 31.58 | 10       | F10:1548 | OB5937 H3A raw.raw | 9.3975E5        | 4        | 4                   | 78    | 98  |                                  |                                                                                 | PEAKS DB  |
| K.TANDLNLLILR.W                          | N    | 67.99  | 1254.7296 | 11     | 0.0  | 628.3721  | 2 | 35.65 | 4        | F4:1764  | OB5931 H6 raw.raw  | 1.549E7         | 6        | 6                   | 378   | 388 |                                  |                                                                                 | PEAKS DB  |
| V.PQNFAVAGK.S                            | N    | 67.74  | 930.4923  | 9      | 0.8  | 466.2538  | 2 | 32.44 | 5        | F5:1562  | OB5932 H2 raw.raw  | 4.3278E6        | 2        | 2                   | 450   | 458 |                                  |                                                                                 | PEAKS DB  |
| K.FFVPPSQSPR.A                           | N    | 67.19  | 1288.6564 | 11     | 0.0  | 645.3354  | 2 | 28.51 | 1        | F1:1229  | OB5921 H2 raw.raw  | 9.0621E4        | 3        | 3                   | 518   | 528 |                                  |                                                                                 | PEAKS DB  |
| R.S(+57.02)PDIYNPQAGSLK.T                | N    | 65.06  | 1445.7150 | 13     | 5.4  | 723.8687  | 2 | 28.54 | 6        | F6:1379  | OB5933 H2 raw.raw  | 8.1843E3        | 1        | 1                   | 365   | 377 |                                  | S1:Carbamidomethylation (DH KE, X@N-term):30.83                                 | PEAKS PTM |
| R.FNLAGNHEQEFLR.Y                        | N    | 64.93  | 1573.7637 | 13     | 1.4  | 787.8902  | 2 | 30.26 | 11       | F11:1483 | OB5938 H3A raw.raw | 1.9024E5        | 5        | 5                   | 196   | 208 |                                  |                                                                                 | PEAKS DB  |
| R.NALFVPH(+14.02)YNTNAHSIIYALR.G         | N    | 55.85  | 2327.2175 | 20     | 0.3  | 776.7467  | 3 | 35.36 | 1        | F1:1633  | OB5921 H2 raw.raw  | 1.4175E5        | 1        | 1                   | 402   | 421 |                                  | H7:Methylation(others):18.00                                                    | PEAKS PTM |
| K.TAN(+.98)DLNLLILR.W                    | N    | 54.07  | 1255.7136 | 11     | -1.0 | 628.8635  | 2 | 35.40 | 6        | F6:1771  | OB5933 H2 raw.raw  | 0               | 0        | 0                   | 378   | 388 | Deamidation (NQ)                 | N3:Deamidation (NQ):68.31                                                       | PEAKS DB  |
| R.WLGLSAE(+53.92)YGNLYR.N                | N    | 49.75  | 1594.6866 | 13     | 0.4  | 532.5697  | 3 | 34.87 | 5        | F5:1718  | OB5932 H2 raw.raw  | 1.8492E5        | 2        | 2                   | 389   | 401 | Replacement of 2 protons by iron | E7:Replacement of 2 protons by iron:156.85                                      | PEAKS PTM |
| K.TAND(+53.92)LNLLILR.W                  | N    | 47.26  | 1308.6488 | 11     | -1.1 | 655.3309  | 2 | 34.62 | 1        | F1:1597  | OB5921 H2 raw.raw  | 1.4902E5        | 1        | 1                   | 378   | 388 | Replacement of 2 protons by iron | D4:Replacement of 2 protons by iron:128.79                                      | PEAKS PTM |
| R.SLPSPY(+31.99)SPQSQPR.Q                | N    | 46.01  | 1637.7686 | 14     | 1.0  | 819.8923  | 2 | 29.76 | 9        | F9:1401  | OB5936 H3A raw.raw | 3.8534E4        | 1        | 1                   | 220   | 233 |                                  | Y7:Dihydroxy:0.00                                                               | PEAKS PTM |
| R.QQPEENAC(+57.02)QFQR.L                 | N    | 45.72  | 1533.6630 | 12     | 1.7  | 767.8401  | 2 | 25.17 | 10       | F10:1164 | OB5937 H3A raw.raw | 6.6881E3        | 2        | 2                   | 25    | 36  | Carbamidomethylation             | C8:Carbamidomethylation:1000.00                                                 | PEAKS DB  |
| N.G(+57.02)IETIC(+57.02)TASVKK.N         | N    | 44.25  | 1491.7603 | 13     | 1.2  | 746.8883  | 2 | 27.43 | 6        | F6:1293  | OB5933 H2 raw.raw  | 2.0504E4        | 1        | 1                   | 346   | 358 | Carbamidomethylation             | G1:Carbamidomethylation (DH KE, X@N-term):30.83;C7:Carbamidomethylation:1000.00 | PEAKS PTM |
| total 37 peptides                        |      |        |           |        |      |           |   |       |          |          |                    |                 |          |                     |       |     |                                  |                                                                                 |           |

| Peptide                          | Uniq | -10lgP | Mass      | Length | ppm  | m/z      | z | RT    | Fraction | Scan     | Source File        | Area Raw in gel | #Feature | #Feature Raw in gel | Start | End | PTM             | AScore                                          | Found By  |
|----------------------------------|------|--------|-----------|--------|------|----------|---|-------|----------|----------|--------------------|-----------------|----------|---------------------|-------|-----|-----------------|-------------------------------------------------|-----------|
| K.FFVPPSQSPRA.V                  | N    | 44.09  | 1359.6935 | 12     | 3.4  | 680.8563 | 2 | 29.07 | 1        | F1:1270  | OB5921 H2 raw.raw  | 1.1159E4        | 1        | 1                   | 518   | 529 |                 |                                                 | PEAKS DB  |
| Q.QLKNNNPFK.F                    | N    | 41.09  | 1101.5930 | 9      | -0.6 | 551.8035 | 2 | 27.25 | 6        | F6:1282  | OB5933 H2 raw.raw  | 1.2465E4        | 2        | 2                   | 509   | 517 |                 |                                                 | PEAKS DB  |
| R.QIVQNLRGENESEEEGAIVTVR.G       | Y    | 40.62  | 2469.2458 | 22     | 1.0  | 824.0900 | 3 | 29.85 | 10       | F10:1443 | OB5937 H3A raw.raw | 0               | 0        | 0                   | 281   | 302 |                 |                                                 | PEAKS DB  |
| R.FNLAGNH(+14.02)EQEFLR.Y        | N    | 40.10  | 1587.7793 | 13     | 1.9  | 530.2681 | 3 | 32.39 | 9        | F9:1568  | OB5936 H3A raw.raw | 1.4807E5        | 2        | 2                   | 196   | 208 |                 | H7:Methylation(others):33.98                    | PEAKS PTM |
| Q.Q(-17.03)LKNNNPFK.F            | N    | 37.25  | 1084.5665 | 9      | 0.4  | 543.2908 | 2 | 28.36 | 6        | F6:1357  | OB5933 H2 raw.raw  | 1.237E4         | 1        | 1                   | 509   | 517 | Pyro-glu from Q | Q1:Pyro-glu from Q:1000.00                      | PEAKS PTM |
| R.N(+.98)ALFVPHYNTNAHSIIYALR.G   | N    | 36.85  | 2314.1858 | 20     | 3.6  | 772.4053 | 3 | 45.28 | 6        | F6:2182  | OB5933 H2 raw.raw  | 6.3088E4        | 1        | 1                   | 402   | 421 |                 | N1:Deamidation (NQ):32.94                       | PEAKS DB  |
| R.R(+14.02)FNLAGNHEQEFLR.Y       | N    | 36.22  | 1743.8805 | 14     | -0.1 | 582.3007 | 3 | 32.19 | 9        | F9:1534  | OB5936 H3A raw.raw | 1.2906E6        | 2        | 2                   | 195   | 208 | Methylation(KR) | R1:Methylation(KR):67.11                        | PEAKS PTM |
| R.NALFVPH(+57.02)YNTNAHSIIYALR.G | N    | 32.65  | 2370.2231 | 20     | -0.3 | 791.0814 | 3 | 33.37 | 5        | F5:1616  | OB5932 H2 raw.raw  | 6.404E5         | 1        | 1                   | 402   | 421 |                 | H7:Carbamidomethylation (DH KE, X@N-term):11.86 | PEAKS PTM |
| R.N(+57.02)ALFVPHYNTNAHSIIYALR.G | N    | 32.14  | 2370.2231 | 20     | -0.5 | 791.0812 | 3 | 33.18 | 6        | F6:1692  | OB5933 H2 raw.raw  | 7.1997E5        | 1        | 1                   | 402   | 421 |                 | N1:Carbamidomethylation (DH KE, X@N-term):42.70 | PEAKS PTM |
| total 37 peptides                |      |        |           |        |      |          |   |       |          |          |                    |                 |          |                     |       |     |                 |                                                 |           |

A1E2B0|A1E2B0\_ARAHY

back to list

| Protein Coverage | Supporting Peptides |

Protein Coverage:

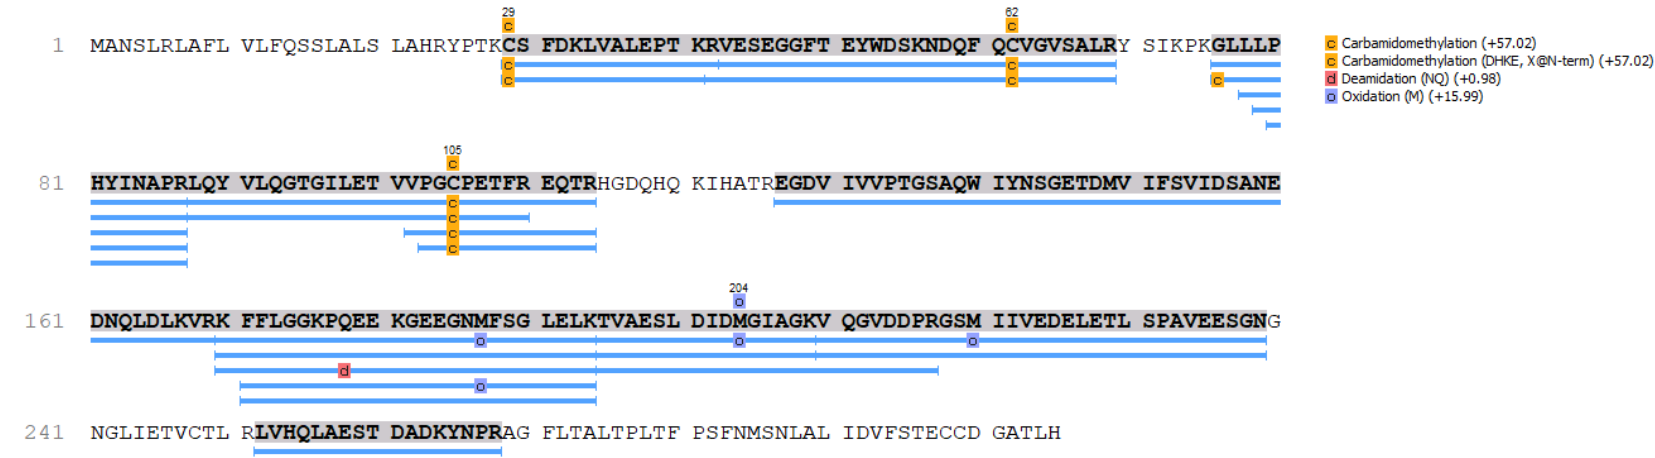

Supporting Peptides:

| Peptide                                  | Uniq | -10lgP | Mass      | Length | ppm | m/z       | z | RT    | Fraction | Scan    | Source File        | Area Raw in gel | #Feature | #Feature Raw in gel | Start | End | PTM                  | AScore                           | Found By |
|------------------------------------------|------|--------|-----------|--------|-----|-----------|---|-------|----------|---------|--------------------|-----------------|----------|---------------------|-------|-----|----------------------|----------------------------------|----------|
| K.FFLGGKPQEEKGEEGNMFSGLELK.T             | N    | 136.55 | 2670.2998 | 24     | 2.4 | 891.1094  | 3 | 34.78 | 2        | F2:1553 | OB5925 H3B raw.raw | 1.858E7         | 6        | 6                   | 171   | 194 |                      |                                  | PEAKS DB |
| R.VESEGGFTEYWDSKNDQFQC(+57.02)VGVSALR.Y  | Y    | 124.63 | 3107.3931 | 27     | 3.3 | 1036.8083 | 3 | 34.05 | 2        | F2:1498 | OB5925 H3B raw.raw | 5.0527E6        | 4        | 4                   | 43    | 69  | Carbamidomethylation | C20:Carbamidomethylation:1000.00 | PEAKS DB |
| K.TVAESLDIDMGIAGK.V                      | Y    | 120.36 | 1518.7599 | 15     | 2.3 | 760.3890  | 2 | 33.12 | 2        | F2:1443 | OB5925 H3B raw.raw | 5.1238E6        | 3        | 3                   | 195   | 209 |                      |                                  | PEAKS DB |
| K.RVESEGGFTEYWDSKNDQFQC(+57.02)VGVSALR.Y | Y    | 115.64 | 3263.4941 | 28     | 3.1 | 1088.8420 | 3 | 33.12 | 2        | F2:1439 | OB5925 H3B raw.raw | 7.9145E5        | 5        | 5                   | 42    | 69  | Carbamidomethylation | C21:Carbamidomethylation:1000.00 | PEAKS DB |
| total 26 peptides                        |      |        |           |        |     |           |   |       |          |         |                    |                 |          |                     |       |     |                      |                                  |          |



| Peptide                                         | Uniq | -10lgP | Mass      | Length | ppm  | m/z       | z | RT    | Fraction | Scan    | Source File              | Area Raw in gel | #Feature | #Feature Raw in gel | Start | End | PTM                                   | AScore                                                     | Found By     |
|-------------------------------------------------|------|--------|-----------|--------|------|-----------|---|-------|----------|---------|--------------------------|-----------------|----------|---------------------|-------|-----|---------------------------------------|------------------------------------------------------------|--------------|
| K.GLLLPHYINAPR.L                                | Y    | 113.14 | 1362.7771 | 12     | 0.3  | 682.3960  | 2 | 31.41 | 7        | F7:1486 | OB5934<br>H3B<br>raw.raw | 8.3765E6        | 6        | 6                   | 76    | 87  |                                       |                                                            | PEAKS<br>DB  |
| R.LQYVLQGTGILETVVPGC(+57.02)PETFR.E             | Y    | 112.13 | 2576.3308 | 23     | 3.4  | 1289.1770 | 2 | 36.84 | 7        | F7:1810 | OB5934<br>H3B<br>raw.raw | 1.1189E6        | 3        | 3                   | 88    | 110 | Carbamidomethylation                  | C18:Carbamidomethylation:1000.00                           | PEAKS<br>DB  |
| R.KFFLGGKPQEEKGEEGNMFSGLELK.T                   | N    | 104.82 | 2798.3948 | 25     | 2.1  | 933.8075  | 3 | 34.42 | 2        | F2:1518 | OB5925<br>H3B<br>raw.raw | 1.4026E7        | 9        | 9                   | 170   | 194 |                                       |                                                            | PEAKS<br>DB  |
| R.LQYVLQGTGILETVVPGC(+57.02)PETFREQTR.H         | Y    | 98.38  | 3090.5808 | 27     | 3.6  | 1031.2046 | 3 | 35.35 | 7        | F7:1755 | OB5934<br>H3B<br>raw.raw | 5.1042E7        | 12       | 12                  | 88    | 114 | Carbamidomethylation                  | C18:Carbamidomethylation:1000.00                           | PEAKS<br>DB  |
| K.C(+57.02)SFDKLVALEPTKR.V                      | Y    | 93.33  | 1662.8762 | 14     | 1.5  | 555.3002  | 3 | 30.69 | 2        | F2:1301 | OB5925<br>H3B<br>raw.raw | 5.6961E4        | 1        | 1                   | 29    | 42  | Carbamidomethylation                  | C1:Carbamidomethylation:1000.00                            | PEAKS<br>DB  |
| K.FFLGGKPQEEKGEEGNM(+15.99)FSGLELK.T            | N    | 92.75  | 2686.2947 | 24     | 1.7  | 896.4404  | 3 | 32.74 | 2        | F2:1411 | OB5925<br>H3B<br>raw.raw | 2.6867E6        | 4        | 4                   | 171   | 194 | Oxidation (M)                         | M17:Oxidation (M):1000.00                                  | PEAKS<br>DB  |
| K.TVAESLDIDM(+15.99)GIAGK.V                     | Y    | 90.40  | 1534.7549 | 15     | 2.8  | 768.3869  | 2 | 30.87 | 2        | F2:1309 | OB5925<br>H3B<br>raw.raw | 5.2987E4        | 2        | 2                   | 195   | 209 | Oxidation (M)                         | M10:Oxidation (M):1000.00                                  | PEAKS<br>DB  |
| K.C(+57.02)SFDKLVALEPTK.R                       | Y    | 86.99  | 1506.7751 | 13     | 1.5  | 754.3960  | 2 | 31.13 | 7        | F7:1476 | OB5934<br>H3B<br>raw.raw | 1.4434E5        | 4        | 4                   | 29    | 41  | Carbamidomethylation                  | C1:Carbamidomethylation:1000.00                            | PEAKS<br>DB  |
| R.LVHQLAESTDADKYNPR.A                           | N    | 86.93  | 1955.9701 | 17     | 1.5  | 652.9983  | 3 | 28.54 | 5        | F5:1329 | OB5932<br>H2 raw.raw     | 2.5664E6        | 9        | 9                   | 252   | 268 |                                       |                                                            | PEAKS<br>DB  |
| R.KFFLGGKPQEEKGEEGNM(+15.99)FSGLELK.T           | N    | 80.26  | 2814.3896 | 25     | 0.9  | 704.6053  | 4 | 32.34 | 7        | F7:1545 | OB5934<br>H3B<br>raw.raw | 8.2213E5        | 2        | 2                   | 170   | 194 | Oxidation (M)                         | M18:Oxidation (M):1000.00                                  | PEAKS<br>DB  |
| K.G(+57.02)LLLPHYINAPR.L                        | Y    | 78.60  | 1419.7986 | 12     | 0.8  | 710.9072  | 2 | 31.80 | 2        | F2:1367 | OB5925<br>H3B<br>raw.raw | 5.831E5         | 5        | 5                   | 76    | 87  | Carbamidomethylation (DHKE, X@N-term) | G1:Carbamidomethylation (DHKE, X@N-term):80.35             | PEAKS<br>PTM |
| R.EGDVIVVPTGSAQWIYNSGETDMVIFSVIDSANEDNQLDLKVR.K | Y    | 74.54  | 4723.2964 | 43     | 3.8  | 1575.4454 | 3 | 41.12 | 7        | F7:2051 | OB5934<br>H3B<br>raw.raw | 4.2033E6        | 3        | 3                   | 127   | 169 |                                       |                                                            | PEAKS<br>DB  |
| K.VQGVDDPRGSMIIVEDELETSPAVEESGN.G               | Y    | 61.95  | 3184.5081 | 30     | 2.6  | 1593.2654 | 2 | 38.94 | 8        | F8:1922 | OB5935<br>H3B<br>raw.raw | 9.8208E5        | 2        | 2                   | 210   | 239 |                                       |                                                            | PEAKS<br>DB  |
| L.PHYINAPR.L                                    | Y    | 60.86  | 966.5035  | 8      | -0.3 | 484.2589  | 2 | 31.65 | 8        | F8:1495 | OB5935<br>H3B<br>raw.raw | 3.8685E5        | 3        | 3                   | 80    | 87  |                                       |                                                            | PEAKS<br>DB  |
| L.LLPHYINAPR.L                                  | Y    | 57.63  | 1192.6716 | 10     | 0.0  | 597.3431  | 2 | 31.41 | 7        | F7:1491 | OB5934<br>H3B<br>raw.raw | 8.2176E5        | 3        | 3                   | 78    | 87  |                                       |                                                            | PEAKS<br>DB  |
| L.LPHYINAPR.L                                   | Y    | 54.27  | 1079.5875 | 9      | 0.0  | 540.8010  | 2 | 31.65 | 8        | F8:1499 | OB5935<br>H3B<br>raw.raw | 1.0935E5        | 2        | 2                   | 79    | 87  |                                       |                                                            | PEAKS<br>DB  |
| R.KFFLGGKPQ(+.98)EEKGEEGNMFSGLELK.T             | N    | 52.55  | 2799.3789 | 25     | 8.5  | 934.1415  | 3 | 34.08 | 7        | F7:1645 | OB5934<br>H3B<br>raw.raw | 0               | 0        | 0                   | 170   | 194 | Deamidation (NQ)                      | Q9:Deamidation (NQ):56.68                                  | PEAKS<br>DB  |
| K.VQGVDDPRGSM(+15.99)IIVEDELETSPAVEESGN.G       | Y    | 48.89  | 3200.5029 | 30     | 5.1  | 1601.2670 | 2 | 36.46 | 7        | F7:1790 | OB5934<br>H3B<br>raw.raw | 8.8212E4        | 1        | 1                   | 210   | 239 | Oxidation (M)                         | M11:Oxidation (M):1000.00                                  | PEAKS<br>DB  |
| V.VPGC(+57.02)PETFREQTR.H                       | Y    | 45.84  | 1575.7463 | 13     | 2.4  | 788.8823  | 2 | 35.35 | 7        | F7:1724 | OB5934<br>H3B<br>raw.raw | 1.1594E6        | 1        | 1                   | 102   | 114 | Carbamidomethylation                  | C4:Carbamidomethylation:1000.00                            | PEAKS<br>DB  |
| V.PGC(+57.02)PETFREQTR.H                        | Y    | 45.04  | 1476.6780 | 12     | 2.0  | 739.3478  | 2 | 35.59 | 8        | F8:1753 | OB5935<br>H3B<br>raw.raw | 5.0655E6        | 2        | 2                   | 103   | 114 | Carbamidomethylation                  | C3:Carbamidomethylation:1000.00                            | PEAKS<br>DB  |
| K.TVAESLDIDMGIAGKVQGVDDPR.G                     | Y    | 44.86  | 2385.1846 | 23     | 3.9  | 1193.6042 | 2 | 33.53 | 8        | F8:1612 | OB5935<br>H3B<br>raw.raw | 7.2301E4        | 1        | 1                   | 195   | 217 |                                       |                                                            | PEAKS<br>DB  |
| R.LQ(+.98)YVLQGTGILETVVPGC(+57.02)PETFREQTR.H   | Y    | 37.95  | 3091.5647 | 27     | 7.8  | 1031.5369 | 3 | 47.69 | 8        | F8:2433 | OB5935<br>H3B<br>raw.raw | 3.862E3         | 1        | 1                   | 88    | 114 | Carbamidomethylation                  | Q2:Deamidation (NQ):31.56;C18:Carbamidomethylation:1000.00 | PEAKS<br>DB  |
| total 26 peptides                               |      |        |           |        |      |           |   |       |          |         |                          |                 |          |                     |       |     |                                       |                                                            |              |

Q38711|Q38711\_ARAHY

[back to list](#)

[Protein Coverage](#) | [Supporting Peptides](#) |

Protein Coverage:

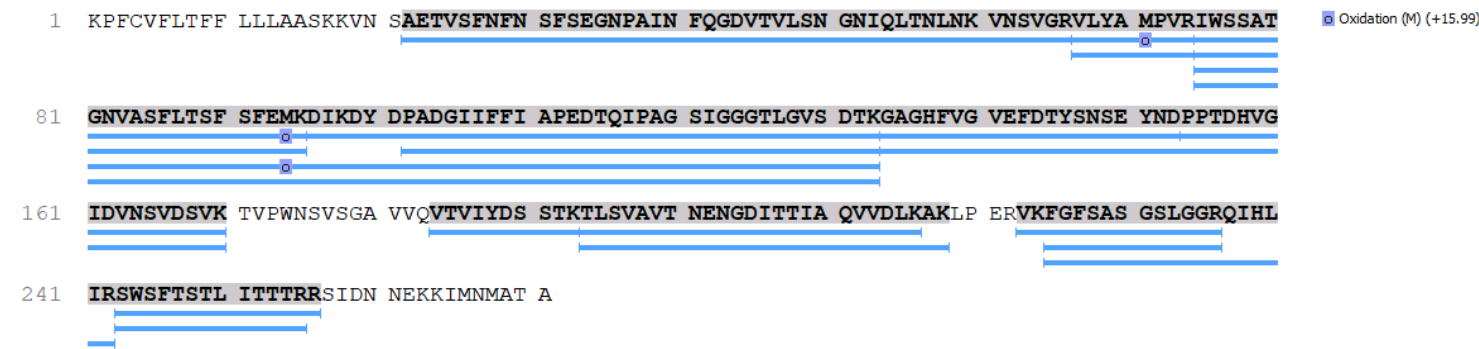

Supporting Peptides:

| Peptide                                   | Uniq | -10lgP | Mass      | Length | ppm  | m/z       | z | RT    | Fraction | Scan    | Source File        | Area Raw in gel | #Feature | #Feature Raw in gel | Start | End | PTM           | AScore                                           | Found By  |
|-------------------------------------------|------|--------|-----------|--------|------|-----------|---|-------|----------|---------|--------------------|-----------------|----------|---------------------|-------|-----|---------------|--------------------------------------------------|-----------|
| R.IWSSATGNVASFLTFSFEMK.D                  | N    | 144.16 | 2309.1038 | 21     | 3.7  | 1155.5635 | 2 | 40.56 | 7        | F7:2025 | OB5934 H3B raw.raw | 1.0023E7        | 3        | 3                   | 75    | 95  |               |                                                  | PEAKS DB  |
| R.SWSFTSTLITTR.R                          | N    | 124.66 | 1499.7620 | 13     | 2.5  | 750.8901  | 2 | 34.61 | 7        | F7:1677 | OB5934 H3B raw.raw | 9.5864E6        | 3        | 3                   | 243   | 255 |               |                                                  | PEAKS DB  |
| K.TLSVAVTNENG DITTIAQVVDLK.A              | Y    | 121.16 | 2400.2747 | 23     | 2.6  | 1201.1477 | 2 | 36.27 | 7        | F7:1788 | OB5934 H3B raw.raw | 4.3282E6        | 3        | 3                   | 194   | 216 |               |                                                  | PEAKS DB  |
| K.FGFSASGSLGGR.Q                          | N    | 117.61 | 1141.5515 | 12     | 1.4  | 571.7838  | 2 | 30.50 | 2        | F2:1278 | OB5925 H3B raw.raw | 1.5431E6        | 3        | 3                   | 225   | 236 |               |                                                  | PEAKS DB  |
| R.IWSSATGNVASFLTFSFEM(+15.99)K.D          | N    | 115.28 | 2325.0986 | 21     | 1.6  | 1163.5585 | 2 | 39.06 | 7        | F7:1947 | OB5934 H3B raw.raw | 1.6326E6        | 3        | 3                   | 75    | 95  | Oxidation (M) | M20:Oxidation (M):1000.00                        | PEAKS DB  |
| K.DIKDYDPADGIIFIAPEDTQIPAGSIGGGTLGVSDTK.G | N    | 106.58 | 3892.9258 | 38     | 2.7  | 1298.6527 | 3 | 39.11 | 2        | F2:1787 | OB5925 H3B raw.raw | 1.6354E7        | 5        | 5                   | 96    | 133 |               |                                                  | PEAKS DB  |
| R.VKFGFSASGSLGGR.Q                        | N    | 101.26 | 1368.7150 | 14     | 1.1  | 685.3655  | 2 | 30.27 | 7        | F7:1424 | OB5934 H3B raw.raw | 1.6529E5        | 4        | 4                   | 223   | 236 |               |                                                  | PEAKS DB  |
| D.PPTDHVGIDVNSVDSVK.T                     | N    | 93.13  | 1777.8846 | 17     | -0.4 | 889.9493  | 2 | 33.30 | 2        | F2:1450 | OB5925 H3B raw.raw | 1.6838E6        | 7        | 7                   | 154   | 170 |               |                                                  | PEAKS DB  |
| K.GAGHFGVVEFDTYSNSEYNDPPTDHVGIDVNSVDSVK.T | N    | 88.70  | 3966.7820 | 37     | 3.1  | 1323.2721 | 3 | 33.12 | 2        | F2:1445 | OB5925 H3B raw.raw | 1.9838E7        | 7        | 7                   | 134   | 170 |               |                                                  | PEAKS DB  |
| K.GAGHFGVVEFDTYSNSEYND.P                  | N    | 88.01  | 2206.9080 | 20     | 2.4  | 1104.4639 | 2 | 32.91 | 7        | F7:1579 | OB5934 H3B raw.raw | 1.1587E6        | 3        | 3                   | 134   | 153 |               |                                                  | PEAKS DB  |
| R.VLYAMPVR.I                              | N    | 82.17  | 947.5262  | 8      | 2.3  | 474.7715  | 2 | 30.09 | 7        | F7:1402 | OB5934 H3B raw.raw | 9.4625E5        | 3        | 3                   | 67    | 74  |               |                                                  | PEAKS DB  |
| R.SWSFTSTLITTRR.S                         | N    | 69.66  | 1655.8632 | 14     | 1.5  | 828.9401  | 2 | 32.96 | 8        | F8:1573 | OB5935 H3B raw.raw | 1.7686E7        | 6        | 6                   | 243   | 256 |               |                                                  | PEAKS DB  |
| K.TLSVAVTNENG DITTIAQVVDLKAK.L            | Y    | 66.43  | 2599.4067 | 25     | 0.1  | 867.4763  | 3 | 34.79 | 7        | F7:1695 | OB5934 H3B raw.raw | 1.6993E6        | 3        | 3                   | 194   | 218 |               |                                                  | PEAKS DB  |
| D.P(+57.02)PTDHVGIDVNSVDSVK.T             | N    | 59.87  | 1834.9061 | 17     | 0.0  | 612.6426  | 3 | 30.08 | 8        | F8:1405 | OB5935 H3B raw.raw | 0               | 0        | 0                   | 154   | 170 |               | P1:Carbamido methylation (D HKE, X@N-term):28.36 | PEAKS PTM |
| R.VLYAM(+15.99)PVR.I                      | N    | 59.45  | 963.5212  | 8      | -0.9 | 482.7674  | 2 | 29.11 | 7        | F7:1353 | OB5934 H3B         | 1.9715E4        | 2        | 2                   | 67    | 74  | Oxidation (M) | M5:Oxidation (M):1000.00                         | PEAKS DB  |
| total 21 peptides                         |      |        |           |        |      |           |   |       |          |         |                    |                 |          |                     |       |     |               |                                                  |           |

| Peptide                                                                | Uniq | -10lgP | Mass      | Length | ppm | m/z       | z | RT    | Fraction | Scan    | Source File                   | Area Raw in gel | #Feature | #Feature Raw in gel | Start | End | PTM           | AScore                    | Found By |
|------------------------------------------------------------------------|------|--------|-----------|--------|-----|-----------|---|-------|----------|---------|-------------------------------|-----------------|----------|---------------------|-------|-----|---------------|---------------------------|----------|
| K.FGFSASGSLGGRQIHLIR.S                                                 | N    | 58.70  | 1902.0223 | 18     | 0.5 | 635.0150  | 3 | 32.37 | 2        | F2:1405 | raw.raw<br>OB5925 H3B raw.raw | 1.9034E5        | 1        | 1                   | 225   | 242 |               |                           | PEAKS DB |
| D.PADGIIFFIAPEDTQIPAGSIGGGTLGVSDTK.G                                   | N    | 44.74  | 3143.6025 | 32     | 4.6 | 1572.8158 | 2 | 38.57 | 8        | F8:1906 | OB5935 H3B raw.raw            | 6.2609E5        | 2        | 2                   | 102   | 133 |               |                           | PEAKS DB |
| R.IWSSATGNVASFLTSSFEMKDIKDYDPADGIIFFIAPEDTQIPAGSIGGGTLGVSDTK.G         | N    | 40.61  | 6184.0190 | 59     | 6.4 | 1547.0220 | 4 | 42.84 | 7        | F7:2162 | OB5934 H3B raw.raw            | 5.5947E6        | 1        | 1                   | 75    | 133 |               |                           | PEAKS DB |
| S.AETVSFNFNSFSEGNPAINFQGDVTVLSNGNIQLTNLKNVSVGR.V                       | N    | 40.54  | 4812.3740 | 45     | 3.9 | 1605.1382 | 3 | 39.43 | 7        | F7:2007 | OB5934 H3B raw.raw            | 1.7542E7        | 3        | 3                   | 22    | 66  |               |                           | PEAKS DB |
| R.IWSSATGNVASFLTSSFEM(+15.99)KDIKDYDPADGIIFFIAPEDTQIPAGSIGGGTLGVSDTK.G | N    | 37.46  | 6200.0137 | 59     | 5.3 | 1551.0189 | 4 | 41.88 | 7        | F7:2118 | OB5934 H3B raw.raw            | 1.2633E7        | 1        | 1                   | 75    | 133 | Oxidation (M) | M20:Oxidation (M):1000.00 | PEAKS DB |
| Q.VTVIYDSSTK.T                                                         | N    | 37.41  | 1111.5760 | 10     | 0.7 | 556.7957  | 2 | 26.75 | 7        | F7:1237 | OB5934 H3B raw.raw            | 6.5025E2        | 1        | 1                   | 184   | 193 |               |                           | PEAKS DB |
| total 21 peptides                                                      |      |        |           |        |     |           |   |       |          |         |                               |                 |          |                     |       |     |               |                           |          |

Q6IWG5|Q6IWG5\_ARAHY

back to list

| [Protein Coverage](#) | [Supporting Peptides](#) |

Protein Coverage:

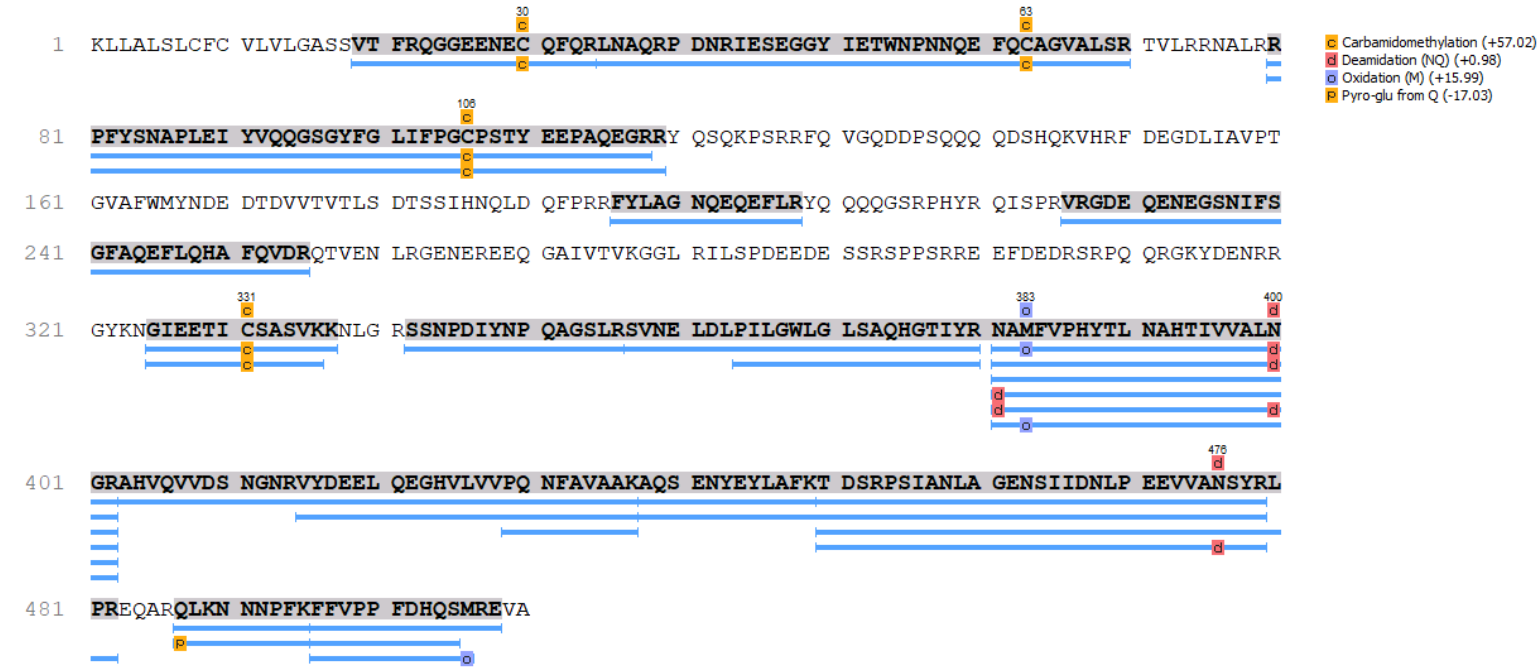

Supporting Peptides:

| Peptide                     | Uniq | -10lgP | Mass      | Length | ppm | m/z       | z | RT    | Fraction | Scan    | Source File       | Area Raw in gel | #Feature | #Feature Raw in gel | Start | End | PTM | AScore | Found By |
|-----------------------------|------|--------|-----------|--------|-----|-----------|---|-------|----------|---------|-------------------|-----------------|----------|---------------------|-------|-----|-----|--------|----------|
| R.NAMEFVPHYTLNAHTIVVALNGR.A | Y    | 133.55 | 2437.2688 | 22     | 1.7 | 1219.6438 | 2 | 35.24 | 5        | F5:1717 | OB5932 H2 raw.raw | 1.1969E7        | 6        | 6                   | 381   | 402 |     |        | PEAKS DB |
| total 40 peptides           |      |        |           |        |     |           |   |       |          |         |                   |                 |          |                     |       |     |     |        |          |

| Peptide                                           | Uniq | -10lgP | Mass      | Length | ppm  | m/z       | z | RT    | Fraction | Scan    | Source File              | Area Raw in gel | #Feature | #Feature Raw in gel | Start | End | PTM                                | AScore                                                                        | Found By  |
|---------------------------------------------------|------|--------|-----------|--------|------|-----------|---|-------|----------|---------|--------------------------|-----------------|----------|---------------------|-------|-----|------------------------------------|-------------------------------------------------------------------------------|-----------|
| R.NAMFVPHYTLNAHTIVVALN(+.98)GR.A                  | Y    | 132.37 | 2438.2529 | 22     | 3.2  | 1220.1377 | 2 | 34.12 | 5        | F5:1671 | OB5932<br>H2<br>raw.raw  | 5.0871E6        | 4        | 4                   | 381   | 402 | Deamidation (NQ)                   | N20:Deamidation (NQ):218.32                                                   | PEAKS DB  |
| R.SVNELDLPLIGWLGLSAQHGTIYR.N                      | Y    | 121.73 | 2651.4070 | 24     | 1.0  | 1326.7120 | 2 | 39.90 | 1        | F1:1894 | OB5921<br>H2<br>raw.raw  | 6.3358E7        | 10       | 10                  | 357   | 380 |                                    |                                                                               | PEAKS DB  |
| K.TDSRPSIANLAGENSIIDNLPEEVVANSYR.L                | Y    | 116.11 | 3243.6006 | 30     | 3.7  | 1082.2114 | 3 | 36.34 | 5        | F5:1837 | OB5932<br>H2<br>raw.raw  | 1.8021E7        | 7        | 7                   | 450   | 479 |                                    |                                                                               | PEAKS DB  |
| R.N(+.98)AMFVPHYTLNAHTIVVALNGR.A                  | Y    | 114.32 | 2438.2529 | 22     | 2.9  | 1220.1373 | 2 | 34.78 | 5        | F5:1708 | OB5932<br>H2<br>raw.raw  | 0               | 0        | 0                   | 381   | 402 | Deamidation (NQ)                   | N1:Deamidation (NQ):79.74                                                     | PEAKS DB  |
| K.TDSRPSIANLAGENSIIDNLPEEVVAN(+.98)SYR.L          | Y    | 114.06 | 3244.5847 | 30     | 3.8  | 1082.5397 | 3 | 35.65 | 5        | F5:1760 | OB5932<br>H2<br>raw.raw  | 0               | 0        | 0                   | 450   | 479 | Deamidation (NQ)                   | N27:Deamidation (NQ):81.59                                                    | PEAKS DB  |
| K.AQSENIEYLAFK.T                                  | Y    | 109.13 | 1461.6776 | 12     | -0.5 | 731.8457  | 2 | 31.69 | 5        | F5:1517 | OB5932<br>H2<br>raw.raw  | 5.3867E6        | 3        | 3                   | 438   | 449 |                                    |                                                                               | PEAKS DB  |
| R.SSNPDIYNPQAGSLR.S                               | Y    | 108.34 | 1617.7747 | 15     | 0.5  | 809.8950  | 2 | 28.51 | 1        | F1:1221 | OB5921<br>H2<br>raw.raw  | 1.8561E6        | 3        | 3                   | 342   | 356 |                                    |                                                                               | PEAKS DB  |
| R.NAM(+15.99)FVPHYTLNAHTIVVALNGR.A                | Y    | 101.30 | 2453.2637 | 22     | 1.2  | 818.7628  | 3 | 33.55 | 5        | F5:1639 | OB5932<br>H2<br>raw.raw  | 1.2362E6        | 2        | 2                   | 381   | 402 | Oxidation (M)                      | M3:Oxidation (M):100.0.00                                                     | PEAKS DB  |
| R.LNAQRPDNRIESEGGYIETWPNPNQEFQC(+57.02)AGVALSR.T  | Y    | 95.82  | 4132.9409 | 36     | 3.0  | 1034.2456 | 4 | 33.11 | 7        | F7:1590 | OB5934<br>H3B<br>raw.raw | 2.0092E6        | 3        | 3                   | 35    | 70  | Carbamidomethylation               | C29:Carbamidomethylation:1000.00                                              | PEAKS DB  |
| R.NAM(+15.99)FVPHYTLNAHTIVVALN(+.98)GR.A          | Y    | 95.09  | 2454.2478 | 22     | 1.8  | 819.0913  | 3 | 33.01 | 5        | F5:1606 | OB5932<br>H2<br>raw.raw  | 1.7713E6        | 6        | 6                   | 381   | 402 | Oxidation (M);<br>Deamidation (NQ) | M3:Oxidation (M):100.0.00;N20:Deamidation (NQ):123.21                         | PEAKS DB  |
| L.PILGWLGLSAQHGTIYR.N                             | Y    | 88.39  | 1881.0261 | 17     | 2.5  | 941.5227  | 2 | 39.89 | 6        | F6:2036 | OB5933<br>H2<br>raw.raw  | 1.5582E5        | 1        | 1                   | 364   | 380 |                                    |                                                                               | PEAKS DB  |
| K.TDSRPSIANLAGEN(+.98)SIIDNLPEEVVANSYR.L          | Y    | 79.83  | 3244.5847 | 30     | 8.0  | 1082.5442 | 3 | 36.12 | 6        | F6:1826 | OB5933<br>H2<br>raw.raw  | 5.3609E7        | 2        | 2                   | 450   | 479 |                                    | N14:Deamidation (NQ):31.31                                                    | PEAKS DB  |
| N.GIEETIC(+57.02)SASVK.K                          | Y    | 77.84  | 1292.6282 | 12     | 2.2  | 647.3228  | 2 | 29.07 | 1        | F1:1261 | OB5921<br>H2<br>raw.raw  | 1.1569E5        | 3        | 3                   | 325   | 336 | Carbamidomethylation               | C7:Carbamidomethylation:1000.00                                               | PEAKS DB  |
| R.SVNE(+57.02)LDLPILGWLGLSAQHGTIYR.N              | Y    | 74.12  | 2708.4285 | 24     | 1.0  | 1355.2229 | 2 | 40.09 | 5        | F5:2024 | OB5932<br>H2<br>raw.raw  | 1.9952E5        | 1        | 1                   | 357   | 380 |                                    | E4:Carbamidomethylation (DHKE, X@N-term):5.03                                 | PEAKS PTM |
| R.NAMFVPHYTLN(+.98)AHTIVVALNGR.A                  | Y    | 72.49  | 2438.2529 | 22     | 3.7  | 813.7613  | 3 | 35.31 | 1        | F1:1635 | OB5921<br>H2<br>raw.raw  | 0               | 0        | 0                   | 381   | 402 |                                    | N11:Deamidation (NQ):33.51                                                    | PEAKS DB  |
| R.AHVQVVDN(+.98)GNRVYDEELQEGHVLVVPQNFVAAB.A       | Y    | 72.14  | 3831.9180 | 35     | 3.6  | 1278.3179 | 3 | 32.25 | 6        | F6:1584 | OB5933<br>H2<br>raw.raw  | 9.4081E6        | 2        | 2                   | 403   | 437 |                                    | N9:Deamidation (NQ):9.40                                                      | PEAKS DB  |
| N.GIEETIC(+57.02)SASVKK.N                         | Y    | 70.86  | 1420.7231 | 13     | 0.8  | 711.3694  | 2 | 27.44 | 5        | F5:1263 | OB5932<br>H2<br>raw.raw  | 3.7518E5        | 3        | 3                   | 325   | 337 | Carbamidomethylation               | C7:Carbamidomethylation:1000.00                                               | PEAKS DB  |
| R.N(+.98)AMFVPHYTLNAHTIVVALN(+.98)GR.A            | Y    | 70.31  | 2439.2368 | 22     | 8.7  | 814.0933  | 3 | 34.13 | 6        | F6:1683 | OB5933<br>H2<br>raw.raw  | 4.359E6         | 1        | 1                   | 381   | 402 | Deamidation (NQ)                   | N1:Deamidation (NQ):53.47;N20:Deamidation (NQ):61.12                          | PEAKS DB  |
| K.FFVPPFDHQSMRE.V                                 | Y    | 69.61  | 1635.7504 | 13     | 1.4  | 818.8836  | 2 | 32.55 | 1        | F1:1469 | OB5921<br>H2<br>raw.raw  | 1.1697E6        | 3        | 3                   | 496   | 508 |                                    |                                                                               | PEAKS DB  |
| R.VYDEELQEGHVLVVPQNFVAAB.A                        | Y    | 59.80  | 2554.3066 | 23     | 1.2  | 852.4438  | 3 | 33.17 | 1        | F1:1510 | OB5921<br>H2<br>raw.raw  | 0               | 0        | 0                   | 415   | 437 |                                    |                                                                               | PEAKS DB  |
| R.RPFYSNAPLEIYVQQSGYFGLIFPGC(+57.02)PSTYEPAQEGR.R | Y    | 58.19  | 4424.0845 | 39     | 3.3  | 1475.7070 | 3 | 40.00 | 9        | F9:2011 | OB5936<br>H3A<br>raw.raw | 1.3954E6        | 3        | 3                   | 80    | 118 | Carbamidomethylation               | C27:Carbamidomethylation:1000.00                                              | PEAKS DB  |
| R.N(+.98)AM(+15.99)FVPHYTLNAHTIVVALN(+.98)GR.A    | Y    | 56.50  | 2455.2317 | 22     | 8.4  | 819.4247  | 3 | 34.50 | 5        | F5:1707 | OB5932<br>H2<br>raw.raw  | 1.9858E5        | 1        | 1                   | 381   | 402 | Oxidation (M)                      | N1:Deamidation (NQ):27.37;M3:Oxidation (M):1000.00;N20:Deamidation (NQ):39.72 | PEAKS DB  |
| K.TDSRPSIANLAGENSIIDNLPEEVVANSYRLPR.E             | Y    | 56.32  | 3609.8386 | 33     | 2.2  | 903.4689  | 4 | 36.12 | 6        | F6:1817 | OB5933<br>H2<br>raw.raw  | 2.0614E7        | 5        | 5                   | 450   | 482 |                                    |                                                                               | PEAKS DB  |
| total 40 peptides                                 |      |        |           |        |      |           |   |       |          |         |                          |                 |          |                     |       |     |                                    |                                                                               |           |

| Peptide                                              | Uniq | -10lgP | Mass      | Length | ppm  | m/z       | z | RT    | Fraction | Scan     | Source File              | Area Raw in gel | #Feature | #Feature Raw in gel | Start | End | PTM                  | AScore                                               | Found By  |
|------------------------------------------------------|------|--------|-----------|--------|------|-----------|---|-------|----------|----------|--------------------------|-----------------|----------|---------------------|-------|-----|----------------------|------------------------------------------------------|-----------|
| R.FYLAGNQEQEFLR.Y                                    | Y    | 55.86  | 1613.7837 | 13     | 1.1  | 807.9000  | 2 | 33.08 | 10       | F10:1641 | OB5937<br>H3A<br>raw.raw | 2.0837E4        | 1        | 1                   | 196   | 208 |                      |                                                      | PEAKS DB  |
| V.PQNFAVAAK.A                                        | N    | 51.55  | 944.5079  | 9      | 0.5  | 473.2615  | 2 | 32.25 | 6        | F6:1586  | OB5933<br>H2<br>raw.raw  | 2.3208E6        | 2        | 2                   | 429   | 437 |                      |                                                      | PEAKS DB  |
| K.FFVPPFDHQS.M                                       | Y    | 51.10  | 1219.5662 | 10     | 0.3  | 610.7905  | 2 | 33.29 | 1        | F1:1544  | OB5921<br>H2<br>raw.raw  | 2.015E5         | 1        | 1                   | 496   | 505 |                      |                                                      | PEAKS DB  |
| R.N(+.98)AMFVPHYTLN(+.98)AHTIVVALNGR.A               | Y    | 48.99  | 2439.2368 | 22     | 9.3  | 814.0938  | 3 | 35.76 | 6        | F6:1773  | OB5933<br>H2<br>raw.raw  | 7.1072E5        | 1        | 1                   | 381   | 402 |                      | N1:Deamidation (NQ):40.15;N11:Deamidation (NQ):28.29 | PEAKS DB  |
| R.VRGDEQENEGSNIFSGFAQEFLQHAFQVDR.Q                   | Y    | 46.71  | 3453.5974 | 30     | 2.1  | 864.4084  | 4 | 38.87 | 11       | F11:1988 | OB5938<br>H3A<br>raw.raw | 1.0226E6        | 2        | 2                   | 226   | 255 |                      |                                                      | PEAKS DB  |
| K.TDSRPSIANLAGENSIIDN(+.98)LPEEVVANSYR.L             | Y    | 46.23  | 3244.5847 | 30     | 8.0  | 1082.5442 | 3 | 36.12 | 6        | F6:1810  | OB5933<br>H2<br>raw.raw  | 5.3512E7        | 1        | 1                   | 450   | 479 |                      | N19:Deamidation (NQ):6.49                            | PEAKS DB  |
| R.SVNELDLPILGW(+31.99)LGLSAQHGTIYR.N                 | Y    | 45.20  | 2683.3970 | 24     | 2.9  | 895.4755  | 3 | 39.13 | 6        | F6:1982  | OB5933<br>H2<br>raw.raw  | 5.8987E5        | 1        | 1                   | 357   | 380 |                      | W12:Dihydroxy:33.65                                  | PEAKS PTM |
| R.AHVQVDSNGN(+.98)RVYDEELQEGHVLVVPQNFVAIAK.A         | Y    | 43.92  | 3831.9180 | 35     | 1.8  | 767.3923  | 5 | 32.25 | 6        | F6:1589  | OB5933<br>H2<br>raw.raw  | 2.7476E5        | 1        | 1                   | 403   | 437 |                      | N11:Deamidation (NQ):0.00                            | PEAKS DB  |
| S.VTFRQGGEENEC(+57.02)QFQR.L                         | Y    | 41.71  | 1983.8857 | 16     | 2.4  | 662.3041  | 3 | 27.37 | 10       | F10:1301 | OB5937<br>H3A<br>raw.raw | 3.4333E3        | 1        | 1                   | 19    | 34  | Carbamidomethylation | C12:Carbamidomethylation:1000.00                     | PEAKS DB  |
| R.QLKNNNPFK.F                                        | N    | 41.09  | 1101.5930 | 9      | -0.6 | 551.8035  | 2 | 27.25 | 6        | F6:1282  | OB5933<br>H2<br>raw.raw  | 1.2465E4        | 2        | 2                   | 487   | 495 |                      |                                                      | PEAKS DB  |
| R.Q(-17.03)LKNNNPFK.F                                | N    | 37.25  | 1084.5665 | 9      | 0.4  | 543.2908  | 2 | 28.36 | 6        | F6:1357  | OB5933<br>H2<br>raw.raw  | 1.237E4         | 1        | 1                   | 487   | 495 | Pyro-glu from Q      | Q1:Pyro-glu from Q:1000.00                           | PEAKS PTM |
| K.AQSE(+53.92)NYEYLAFAK.T                            | Y    | 36.12  | 1515.5968 | 12     | 0.0  | 758.8057  | 2 | 31.36 | 1        | F1:1403  | OB5921<br>H2<br>raw.raw  | 0               | 0        | 0                   | 438   | 449 |                      | E4:Replacement of 2 protons by iron:37.81            | PEAKS PTM |
| K.FFVPPFDHQS.M(+15.99).R                             | Y    | 33.29  | 1366.6016 | 11     | -0.2 | 684.3079  | 2 | 33.49 | 1        | F1:1527  | OB5921<br>H2<br>raw.raw  | 4.1366E4        | 1        | 1                   | 496   | 506 | Oxidation (M)        | M11:Oxidation (M):1000.00                            | PEAKS DB  |
| K.AQSENYEYLAFAKTDSPSIANLAGEN(+.98)SIIDNLPEEVVANSYR.L | Y    | 33.10  | 4688.2515 | 42     | 4.7  | 1173.0757 | 4 | 36.70 | 5        | F5:1816  | OB5932<br>H2<br>raw.raw  | 2.4176E5        | 1        | 1                   | 438   | 479 |                      | N26:Deamidation (NQ):0.00                            | PEAKS DB  |
| R.RPFYSNAPLEIVVQGGSGYFGLIFPGC(+57.02)PSTYEPAQEGRR.Y  | Y    | 31.99  | 4580.1860 | 40     | 2.2  | 1527.7394 | 3 | 37.52 | 10       | F10:1900 | OB5937<br>H3A<br>raw.raw | 6.9008E5        | 1        | 1                   | 80    | 119 | Carbamidomethylation | C27:Carbamidomethylation:1000.00                     | PEAKS DB  |
| R.AHVQ(+.98)VVDSNGNRVYDEELQEGHVLVVPQNFVAIAK.A        | Y    | 31.98  | 3831.9180 | 35     | 2.1  | 767.3925  | 5 | 32.58 | 5        | F5:1579  | OB5932<br>H2<br>raw.raw  | 0               | 0        | 0                   | 403   | 437 |                      | Q4:Deamidation (NQ):0.00                             | PEAKS DB  |
| total 40 peptides                                    |      |        |           |        |      |           |   |       |          |          |                          |                 |          |                     |       |     |                      |                                                      |           |

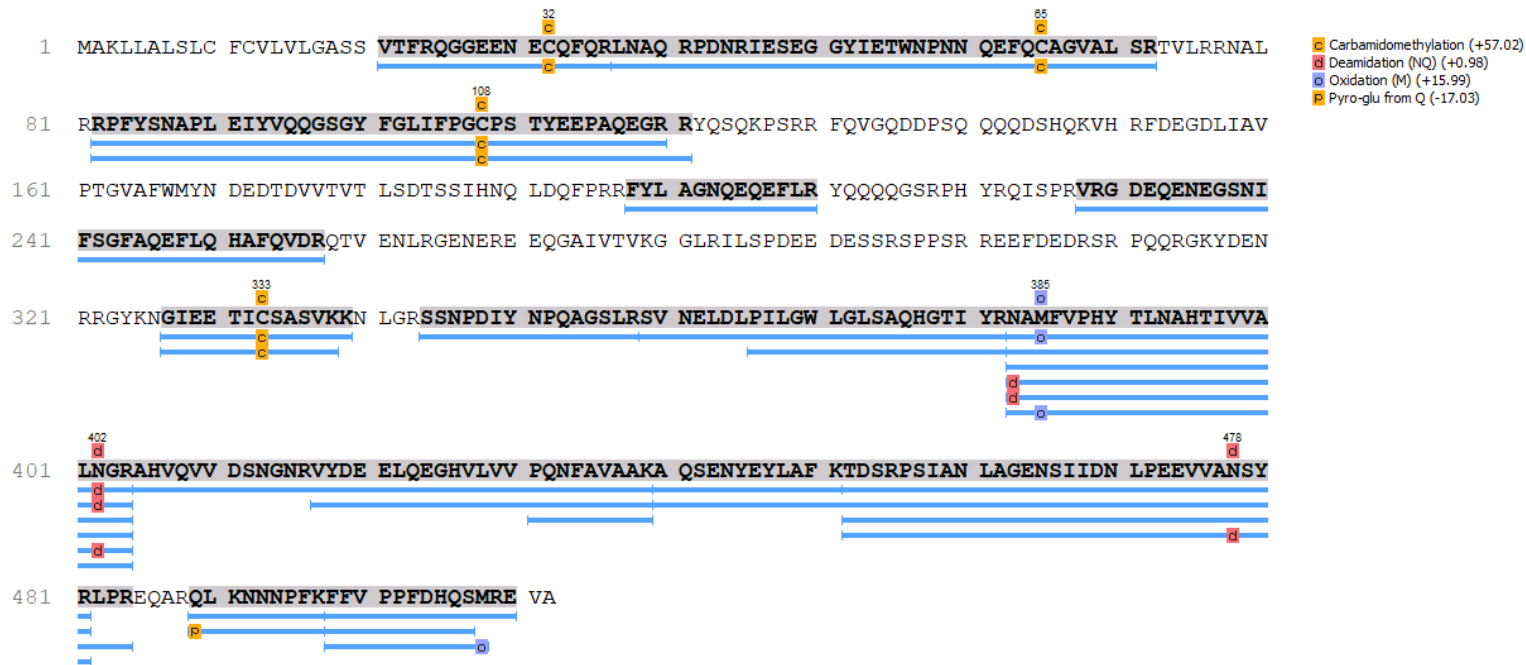

Supporting Peptides:

| Peptide                                          | Uniq | -10lgP | Mass      | Length | ppm  | m/z       | z | RT    | Fraction | Scan    | Source File        | Area Raw in gel | #Feature | #Feature Raw in gel | Start | End | PTM                             | AScore                                                | Found By |
|--------------------------------------------------|------|--------|-----------|--------|------|-----------|---|-------|----------|---------|--------------------|-----------------|----------|---------------------|-------|-----|---------------------------------|-------------------------------------------------------|----------|
| R.NAMFVPHYTLNAHTIVVALNGR.A                       | Y    | 133.55 | 2437.2688 | 22     | 1.7  | 1219.6438 | 2 | 35.24 | 5        | F5:1717 | OB5932 H2 raw.raw  | 1.1969E7        | 6        | 6                   | 383   | 404 |                                 |                                                       | PEAKS DB |
| R.NAMFVPHYTLNAHTIVVALN(+.98)GR.A                 | Y    | 132.37 | 2438.2529 | 22     | 3.2  | 1220.1377 | 2 | 34.12 | 5        | F5:1671 | OB5932 H2 raw.raw  | 5.0871E6        | 4        | 4                   | 383   | 404 | Deamidation (NQ)                | N20:Deamidation (NQ):218.32                           | PEAKS DB |
| R.SVNELDLPILGWLGLSAQHGTIYR.N                     | Y    | 121.73 | 2651.4070 | 24     | 1.0  | 1326.7120 | 2 | 39.90 | 1        | F1:1894 | OB5921 H2 raw.raw  | 6.3358E7        | 10       | 10                  | 359   | 382 |                                 |                                                       | PEAKS DB |
| K.TDSRPSIANLAGENSIIDNLPEEVVANSYR.L               | Y    | 116.11 | 3243.6006 | 30     | 3.7  | 1082.2114 | 3 | 36.34 | 5        | F5:1837 | OB5932 H2 raw.raw  | 1.8021E7        | 7        | 7                   | 452   | 481 |                                 |                                                       | PEAKS DB |
| R.N(+.98)AMFVPHYTLNAHTIVVALNGR.A                 | Y    | 114.32 | 2438.2529 | 22     | 2.9  | 1220.1373 | 2 | 34.78 | 5        | F5:1708 | OB5932 H2 raw.raw  | 0               | 0        | 0                   | 383   | 404 | Deamidation (NQ)                | N1:Deamidation (NQ):79.74                             | PEAKS DB |
| K.TDSRPSIANLAGENSIIDNLPEEVVAN(+.98)SYR.L         | Y    | 114.06 | 3244.5847 | 30     | 3.8  | 1082.5397 | 3 | 35.65 | 5        | F5:1760 | OB5932 H2 raw.raw  | 0               | 0        | 0                   | 452   | 481 | Deamidation (NQ)                | N27:Deamidation (NQ):81.59                            | PEAKS DB |
| K.AQSENYEYLAFK.T                                 | Y    | 109.13 | 1461.6776 | 12     | -0.5 | 731.8457  | 2 | 31.69 | 5        | F5:1517 | OB5932 H2 raw.raw  | 5.3867E6        | 3        | 3                   | 440   | 451 |                                 |                                                       | PEAKS DB |
| R.SSNPDIYNPQAGSLR.S                              | Y    | 108.34 | 1617.7747 | 15     | 0.5  | 809.8950  | 2 | 28.51 | 1        | F1:1221 | OB5921 H2 raw.raw  | 1.8561E6        | 3        | 3                   | 344   | 358 |                                 |                                                       | PEAKS DB |
| R.NAM(+15.99)FVPHYTLNAHTIVVALNGR.A               | Y    | 101.30 | 2453.2637 | 22     | 1.2  | 818.7628  | 3 | 33.55 | 5        | F5:1639 | OB5932 H2 raw.raw  | 1.2362E6        | 2        | 2                   | 383   | 404 | Oxidation (M)                   | M3:Oxidation (M):100 0.00                             | PEAKS DB |
| R.LNAQRPDNRIESEGGYIETWNPNNQEFQC(+57.02)AGVALSR.T | Y    | 95.82  | 4132.9409 | 36     | 3.0  | 1034.2456 | 4 | 33.11 | 7        | F7:1590 | OB5934 H3B raw.raw | 2.0092E6        | 3        | 3                   | 37    | 72  | Carbamidomethylation            | C29:Carbamidomethylation:1000.00                      | PEAKS DB |
| R.NAM(+15.99)FVPHYTLNAHTIVVALN(+.98)GR.A         | Y    | 95.09  | 2454.2478 | 22     | 1.8  | 819.0913  | 3 | 33.01 | 5        | F5:1606 | OB5932 H2 raw.raw  | 1.7713E6        | 6        | 6                   | 383   | 404 | Oxidation (M); Deamidation (NQ) | M3:Oxidation (M):100 0.00;N20:Deamidation (NQ):123.21 | PEAKS DB |
| total 40 peptides                                |      |        |           |        |      |           |   |       |          |         |                    |                 |          |                     |       |     |                                 |                                                       |          |

| Peptide                                          | Uniq | -10lgP | Mass      | Length | ppm  | m/z       | z | RT    | Fraction | Scan     | Source File              | Area Raw in gel | #Feature | #Feature Raw in gel | Start | End | PTM                  | AScore                                                                                   | Found By     |
|--------------------------------------------------|------|--------|-----------|--------|------|-----------|---|-------|----------|----------|--------------------------|-----------------|----------|---------------------|-------|-----|----------------------|------------------------------------------------------------------------------------------|--------------|
| L.PILGWLGLSAQHGTIYR.N                            | Y    | 88.39  | 1881.0261 | 17     | 2.5  | 941.5227  | 2 | 39.89 | 6        | F6:2036  | OB5933<br>H2<br>raw.raw  | 1.5582E5        | 1        | 1                   | 366   | 382 |                      |                                                                                          | PEAKS<br>DB  |
| K.TDSRPSIANLAGEN(+.98)SIIDNLPEEVVANSYR.L         | Y    | 79.83  | 3244.5847 | 30     | 8.0  | 1082.5442 | 3 | 36.12 | 6        | F6:1826  | OB5933<br>H2<br>raw.raw  | 5.3609E7        | 2        | 2                   | 452   | 481 |                      | N14:Deamidation (N Q):31.31                                                              | PEAKS<br>DB  |
| N.GIEETIC(+57.02)SASVK.K                         | Y    | 77.84  | 1292.6282 | 12     | 2.2  | 647.3228  | 2 | 29.07 | 1        | F1:1261  | OB5921<br>H2<br>raw.raw  | 1.1569E5        | 3        | 3                   | 327   | 338 | Carbamidomethylation | C7:Carbamidomethylat<br>ion:1000.00                                                      | PEAKS<br>DB  |
| R.SVNE(+57.02)LDLPILGWLGLSAQHGTIYR.N             | Y    | 74.12  | 2708.4285 | 24     | 1.0  | 1355.2229 | 2 | 40.09 | 5        | F5:2024  | OB5932<br>H2<br>raw.raw  | 1.9952E5        | 1        | 1                   | 359   | 382 |                      | E4:Carbamidomethylat<br>ion (DHKE, X@N-ter<br>m):5.03                                    | PEAKS<br>PTM |
| R.NAMFVPHYTLN(+.98)AHTIVVALNGR.A                 | Y    | 72.49  | 2438.2529 | 22     | 3.7  | 813.7613  | 3 | 35.31 | 1        | F1:1635  | OB5921<br>H2<br>raw.raw  | 0               | 0        | 0                   | 383   | 404 |                      | N11:Deamidation (N Q):33.51                                                              | PEAKS<br>DB  |
| R.AHVQVVDSDN(+.98)GNRVYDEELQEGHVLVVPQNFABA.A     | Y    | 72.14  | 3831.9180 | 35     | 3.6  | 1278.3179 | 3 | 32.25 | 6        | F6:1584  | OB5933<br>H2<br>raw.raw  | 9.4081E6        | 2        | 2                   | 405   | 439 |                      | N9:Deamidation (NQ):<br>9.40                                                             | PEAKS<br>DB  |
| N.GIEETIC(+57.02)SASVKK.N                        | Y    | 70.86  | 1420.7231 | 13     | 0.8  | 711.3694  | 2 | 27.44 | 5        | F5:1263  | OB5932<br>H2<br>raw.raw  | 3.7518E5        | 3        | 3                   | 327   | 339 | Carbamidomethylation | C7:Carbamidomethylat<br>ion:1000.00                                                      | PEAKS<br>DB  |
| R.N(+.98)AMFVPHYTLNAHTIVVALN(+.98)GR.A           | Y    | 70.31  | 2439.2368 | 22     | 8.7  | 814.0933  | 3 | 34.13 | 6        | F6:1683  | OB5933<br>H2<br>raw.raw  | 4.359E6         | 1        | 1                   | 383   | 404 | Deamidation (NQ)     | N1:Deamidation (NQ):<br>53.47;N20:Deamidatio<br>n (NQ):61.12                             | PEAKS<br>DB  |
| K.FFVPPFDHQS.MRE.V                               | Y    | 69.61  | 1635.7504 | 13     | 1.4  | 818.8836  | 2 | 32.55 | 1        | F1:1469  | OB5921<br>H2<br>raw.raw  | 1.1697E6        | 3        | 3                   | 498   | 510 |                      |                                                                                          | PEAKS<br>DB  |
| R.VYDEELQEGHVLVVPQNFABA.A                        | Y    | 59.80  | 2554.3066 | 23     | 1.2  | 852.4438  | 3 | 33.17 | 1        | F1:1510  | OB5921<br>H2<br>raw.raw  | 0               | 0        | 0                   | 417   | 439 |                      |                                                                                          | PEAKS<br>DB  |
| R.RPFYSNAPLEIYVQGSYGFLIFPGC(+57.02)PSTYEPAQEGR.R | Y    | 58.19  | 4424.0845 | 39     | 3.3  | 1475.7070 | 3 | 40.00 | 9        | F9:2011  | OB5936<br>H3A<br>raw.raw | 1.3954E6        | 3        | 3                   | 82    | 120 | Carbamidomethylation | C27:Carbamidomethyl<br>ation:1000.00                                                     | PEAKS<br>DB  |
| R.N(+.98)AM(+15.99)FVPHYTLNAHTIVVALN(+.98)GR.A   | Y    | 56.50  | 2455.2317 | 22     | 8.4  | 819.4247  | 3 | 34.50 | 5        | F5:1707  | OB5932<br>H2<br>raw.raw  | 1.9858E5        | 1        | 1                   | 383   | 404 | Oxidation (M)        | N1:Deamidation (NQ):<br>27.37;M3:Oxidation<br>(M):1000.00;N20:Dea<br>midation (NQ):39.72 | PEAKS<br>DB  |
| K.TDSRPSIANLAGENSIIIDNLPEEVVANSYRLPR.E           | Y    | 56.32  | 3609.8386 | 33     | 2.2  | 903.4689  | 4 | 36.12 | 6        | F6:1817  | OB5933<br>H2<br>raw.raw  | 2.0614E7        | 5        | 5                   | 452   | 484 |                      |                                                                                          | PEAKS<br>DB  |
| R.FYLAGNQEQEFLR.Y                                | Y    | 55.86  | 1613.7837 | 13     | 1.1  | 807.9000  | 2 | 33.08 | 10       | F10:1641 | OB5937<br>H3A<br>raw.raw | 2.0837E4        | 1        | 1                   | 198   | 210 |                      |                                                                                          | PEAKS<br>DB  |
| V.PQNFAVAAK.A                                    | N    | 51.55  | 944.5079  | 9      | 0.5  | 473.2615  | 2 | 32.25 | 6        | F6:1586  | OB5933<br>H2<br>raw.raw  | 2.3208E6        | 2        | 2                   | 431   | 439 |                      |                                                                                          | PEAKS<br>DB  |
| K.FFVPPFDHQS.M                                   | Y    | 51.10  | 1219.5662 | 10     | 0.3  | 610.7905  | 2 | 33.29 | 1        | F1:1544  | OB5921<br>H2<br>raw.raw  | 2.015E5         | 1        | 1                   | 498   | 507 |                      |                                                                                          | PEAKS<br>DB  |
| R.N(+.98)AMFVPHYTLN(+.98)AHTIVVALNGR.A           | Y    | 48.99  | 2439.2368 | 22     | 9.3  | 814.0938  | 3 | 35.76 | 6        | F6:1773  | OB5933<br>H2<br>raw.raw  | 7.1072E5        | 1        | 1                   | 383   | 404 |                      | N1:Deamidation (NQ):<br>40.15;N11:Deamidatio<br>n (NQ):28.29                             | PEAKS<br>DB  |
| R.VRGDEQENEGSNIFSGFAQEFLQHAFQVDR.Q               | Y    | 46.71  | 3453.5974 | 30     | 2.1  | 864.4084  | 4 | 38.87 | 11       | F11:1988 | OB5938<br>H3A<br>raw.raw | 1.0226E6        | 2        | 2                   | 228   | 257 |                      |                                                                                          | PEAKS<br>DB  |
| K.TDSRPSIANLAGENSIIIDN(+.98)LPPEEVVANSYR.L       | Y    | 46.23  | 3244.5847 | 30     | 8.0  | 1082.5442 | 3 | 36.12 | 6        | F6:1810  | OB5933<br>H2<br>raw.raw  | 5.3512E7        | 1        | 1                   | 452   | 481 |                      | N19:Deamidation (N Q):6.49                                                               | PEAKS<br>DB  |
| R.SVNELDLPILGW(+31.99)LGLSAQHGTIYR.N             | Y    | 45.20  | 2683.3970 | 24     | 2.9  | 895.4755  | 3 | 39.13 | 6        | F6:1982  | OB5933<br>H2<br>raw.raw  | 5.8987E5        | 1        | 1                   | 359   | 382 |                      | W12:Dihydroxy:33.65                                                                      | PEAKS<br>PTM |
| R.AHVQVVDSDNGN(+.98)RVYDEELQEGHVLVVPQNFABA.A     | Y    | 43.92  | 3831.9180 | 35     | 1.8  | 767.3923  | 5 | 32.25 | 6        | F6:1589  | OB5933<br>H2<br>raw.raw  | 2.7476E5        | 1        | 1                   | 405   | 439 |                      | N11:Deamidation (N Q):0.00                                                               | PEAKS<br>DB  |
| S.VTFRQGGEENEC(+57.02)QFQR.L                     | Y    | 41.71  | 1983.8857 | 16     | 2.4  | 662.3041  | 3 | 27.37 | 10       | F10:1301 | OB5937<br>H3A<br>raw.raw | 3.4333E3        | 1        | 1                   | 21    | 36  | Carbamidomethylation | C12:Carbamidomethyl<br>ation:1000.00                                                     | PEAKS<br>DB  |
| R.QLKNNNPFK.F                                    | N    | 41.09  | 1101.5930 | 9      | -0.6 | 551.8035  | 2 | 27.25 | 6        | F6:1282  | OB5933<br>H2<br>raw.raw  | 1.2465E4        | 2        | 2                   | 489   | 497 |                      |                                                                                          | PEAKS<br>DB  |
| total 40 peptides                                |      |        |           |        |      |           |   |       |          |          |                          |                 |          |                     |       |     |                      |                                                                                          |              |

**total 22 peptides**



| Peptide                                                                 | Uniq | -10lgP | Mass      | Length | ppm  | m/z       | z | RT    | Fraction | Scan    | Source File        | Area Raw in gel | #Feature | #Feature Raw in gel | Start | End | PTM           | AScore                                           | Found By  |
|-------------------------------------------------------------------------|------|--------|-----------|--------|------|-----------|---|-------|----------|---------|--------------------|-----------------|----------|---------------------|-------|-----|---------------|--------------------------------------------------|-----------|
| K.TLSVAVTNDNGDITIAQVVDLKAK.L                                            | N    | 82.35  | 2585.3911 | 25     | 2.1  | 1293.7056 | 2 | 34.66 | 8        | F8:1679 | OB5935 H3B raw.raw | 8.0711E6        | 5        | 5                   | 196   | 220 |               |                                                  | PEAKS DB  |
| R.VLYAMPVR.I                                                            | N    | 82.17  | 947.5262  | 8      | 2.3  | 474.7715  | 2 | 30.09 | 7        | F7:1402 | OB5934 H3B raw.raw | 9.4625E5        | 3        | 3                   | 69    | 76  |               |                                                  | PEAKS DB  |
| K.FGFSASGSR.A                                                           | Y    | 74.07  | 914.4246  | 9      | -0.4 | 458.2194  | 2 | 27.93 | 2        | F2:1143 | OB5925 H3B raw.raw | 1.3943E4        | 3        | 3                   | 227   | 235 |               |                                                  | PEAKS DB  |
| R.SWSFTSTLITTRR.S                                                       | N    | 69.66  | 1655.8632 | 14     | 1.5  | 828.9401  | 2 | 32.96 | 8        | F8:1573 | OB5935 H3B raw.raw | 1.7686E7        | 6        | 6                   | 245   | 258 |               |                                                  | PEAKS DB  |
| D.P(+57.02)PTDHVGIDVNSVDSVK.T                                           | N    | 59.87  | 1834.9061 | 17     | 0.0  | 612.6426  | 3 | 30.08 | 8        | F8:1405 | OB5935 H3B raw.raw | 0               | 0        | 0                   | 156   | 172 |               | P1:Carbamido methylation (D HKE, X@N-term):28.36 | PEAKS PTM |
| R.VLYAM(+15.99)PVR.I                                                    | N    | 59.45  | 963.5212  | 8      | -0.9 | 482.7674  | 2 | 29.11 | 7        | F7:1353 | OB5934 H3B raw.raw | 1.9715E4        | 2        | 2                   | 69    | 76  | Oxidation (M) | M5:Oxidation (M):1000.00                         | PEAKS DB  |
| D.PADGIIFFIAPEDTQIPAGSIGGGTLGVSDTK.G                                    | N    | 44.74  | 3143.6025 | 32     | 4.6  | 1572.8158 | 2 | 38.57 | 8        | F8:1906 | OB5935 H3B raw.raw | 6.2609E5        | 2        | 2                   | 104   | 135 |               |                                                  | PEAKS DB  |
| R.VKFGFSASGSR.A                                                         | Y    | 44.09  | 1141.5880 | 11     | -0.8 | 571.8008  | 2 | 29.33 | 8        | F8:1359 | OB5935 H3B raw.raw | 1.1968E3        | 1        | 1                   | 225   | 235 |               |                                                  | PEAKS DB  |
| K.GAGYFVGVEFDTSYNSSEYNDPPTDHVGIDVNSVDSVK.T                              | Y    | 44.08  | 3992.7864 | 37     | 2.7  | 1331.9397 | 3 | 37.42 | 2        | F2:1595 | OB5925 H3B raw.raw | 4.597E5         | 1        | 1                   | 136   | 172 |               |                                                  | PEAKS DB  |
| R.IWSSATGNVASFLTSFSFEMKDIKDYDPADGIIFFIAPEDTQIPAGSIGGGTLGVSDTK.G         | N    | 40.61  | 6184.0190 | 59     | 6.4  | 1547.0220 | 4 | 42.84 | 7        | F7:2162 | OB5934 H3B raw.raw | 5.5947E6        | 1        | 1                   | 77    | 135 |               |                                                  | PEAKS DB  |
| S.AETVSFNFNSFSEGNPAINFQGDVTVLSNGNIQLTNLKNVNSVGR.V                       | N    | 40.54  | 4812.3740 | 45     | 3.9  | 1605.1382 | 3 | 39.43 | 7        | F7:2007 | OB5934 H3B raw.raw | 1.7542E7        | 3        | 3                   | 24    | 68  |               |                                                  | PEAKS DB  |
| T.L(+104.03)SVAVTNDNGDITIAQVVDLK.A                                      | N    | 40.14  | 2389.2375 | 22     | 9.4  | 1195.6373 | 2 | 36.47 | 2        | F2:1654 | OB5925 H3B raw.raw | 1.2686E5        | 1        | 1                   | 197   | 218 | Benzoyl       | L1:Benzoyl:12 4.10                               | PEAKS PTM |
| R.IWSSATGNVASFLTSFSFEM(+15.99)KDIKDYDPADGIIFFIAPEDTQIPAGSIGGGTLGVSDTK.G | N    | 37.46  | 6200.0137 | 59     | 5.3  | 1551.0189 | 4 | 41.88 | 7        | F7:2118 | OB5934 H3B raw.raw | 1.2633E7        | 1        | 1                   | 77    | 135 | Oxidation (M) | M20:Oxidation (M):1000.00                        | PEAKS DB  |
| K.VTVIYDSSTK.T                                                          | N    | 37.41  | 1111.5760 | 10     | 0.7  | 556.7957  | 2 | 26.75 | 7        | F7:1237 | OB5934 H3B raw.raw | 6.5025E2        | 1        | 1                   | 186   | 195 |               |                                                  | PEAKS DB  |
| K.TLSVAVTNDNGDITIAQVVDLKAKLPER.V                                        | N    | 34.71  | 3080.6716 | 29     | 2.1  | 771.1768  | 4 | 36.14 | 8        | F8:1745 | OB5935 H3B raw.raw | 1.01E6          | 1        | 1                   | 196   | 224 |               |                                                  | PEAKS DB  |
| total 22 peptides                                                       |      |        |           |        |      |           |   |       |          |         |                    |                 |          |                     |       |     |               |                                                  |           |

sp|Q647H2|AHY3\_ARAHY

[back to list](#)[| Protein Coverage](#) | [Supporting Peptides](#) |

Protein Coverage:

1MAKLLALSVCFCFLVLGASSVTFRQQGEENECQFQRLNAQRPDNCIESEGGYIETWNPNNQEFQCAGVALSRFVLRRNAL

81RRPFYSNAPQEIFIYQGSYGFLIFPGCPGTFEETIQGSEQFQRPSRHFQGDQSQRPDLDTQKVHGFREGDLIAPVPHGV

161AFWIYNDQDTDVVAISVLHTNSLHNQLDQFPRRFNLAGKQEQEFLRYQQRSGRQSPKGEEQEQQENEGGNVFSGFSTEF

241LSHGFQVNEDIVRNLRGENEREEQGAIVTVKGGLSILVPPEWRQSYQQPGRGDKDFNNGIEETICTATVKMNIGKSTSAD

321IYNPQAGSVRTVNELDLPILNRLGLSAEYGSIHRRDAMFVPHYNNMANSMIYALHGGAHVQVVDGNGNRVFDDELQEGQSL

401VVPQNFAVAASKSQSEHFLYVAFKTNRSRASNLAGKNSYMWNLPEDEVVANSYGLQYEQARQLKNNNPFTFLVPPQDSQMI

481RTVA

Carbamidomethylation (+57.02)

Carbamidomethylation (DHKE, X@N-term) (+57.02)

Supporting Peptides:

| Peptide                         | Uniq | -10lgP | Mass      | Length | ppm  | m/z       | z | RT    | Fraction | Scan    | Source File        | Area Raw in gel | #Feature | #Feature Raw in gel | Start | End | PTM                                   | AScore                                                                        | Found By  |
|---------------------------------|------|--------|-----------|--------|------|-----------|---|-------|----------|---------|--------------------|-----------------|----------|---------------------|-------|-----|---------------------------------------|-------------------------------------------------------------------------------|-----------|
| K.NSYMWNLPEDEVVANSYGLQYEQAR.Q   | Y    | 125.11 | 2846.2969 | 24     | 1.9  | 1424.1584 | 2 | 37.08 | 5        | F5:1849 | OB5932 H2 raw.raw  | 8.6777E5        | 4        | 4                   | 437   | 460 |                                       |                                                                               | PEAKS DB  |
| K.SQSEHFLYVAFK.T                | Y    | 117.09 | 1454.7194 | 12     | 2.0  | 728.3684  | 2 | 31.80 | 1        | F1:1430 | OB5921 H2 raw.raw  | 2.9709E6        | 6        | 6                   | 412   | 423 |                                       |                                                                               | PEAKS DB  |
| R.RFNLAGKQEQLR.Y                | Y    | 108.40 | 1734.9165 | 14     | -0.3 | 579.3126  | 3 | 30.84 | 7        | F7:1458 | OB5934 H3B raw.raw | 5.9257E5        | 5        | 5                   | 193   | 206 |                                       |                                                                               | PEAKS DB  |
| R.TVNELDLPILN.R                 | Y    | 102.21 | 1395.7721 | 12     | 1.8  | 698.8946  | 2 | 34.50 | 5        | F5:1692 | OB5932 H2 raw.raw  | 1.2891E7        | 3        | 3                   | 331   | 342 |                                       |                                                                               | PEAKS DB  |
| N.GIETIC(+57.02)TATVK.M         | N    | 96.25  | 1320.6595 | 12     | 1.3  | 661.3379  | 2 | 29.46 | 5        | F5:1390 | OB5932 H2 raw.raw  | 2.7846E5        | 3        | 3                   | 299   | 310 | Carbamidomethylation                  | C7:Carbamidomethylation:1000.00                                               | PEAKS DB  |
| R.LGLSAEYGSIH.R                 | Y    | 92.18  | 1301.6727 | 12     | 1.1  | 651.8444  | 2 | 28.72 | 6        | F6:1375 | OB5933 H2 raw.raw  | 6.496E5         | 5        | 5                   | 343   | 354 |                                       |                                                                               | PEAKS DB  |
| K.STSADIYNPQAGSVR.T             | Y    | 89.20  | 1564.7482 | 15     | 0.9  | 783.3821  | 2 | 27.61 | 5        | F5:1266 | OB5932 H2 raw.raw  | 2.6144E5        | 3        | 3                   | 316   | 330 |                                       |                                                                               | PEAKS DB  |
| R.VFDEELQEGSLVVPQNFAVAAS        | Y    | 88.89  | 2517.2751 | 23     | 1.1  | 1259.6462 | 2 | 35.25 | 5        | F5:1736 | OB5932 H2 raw.raw  | 1.6786E5        | 1        | 1                   | 389   | 411 |                                       |                                                                               | PEAKS DB  |
| K.NNNPFTFLVPPQDSQMIR.T          | Y    | 74.25  | 2117.0364 | 18     | 2.5  | 1059.5281 | 2 | 36.56 | 5        | F5:1814 | OB5932 H2 raw.raw  | 0               | 0        | 0                   | 464   | 481 |                                       |                                                                               | PEAKS DB  |
| K.NNNPFTFLVPPQDSQMIRT.V         | Y    | 65.73  | 2218.0840 | 19     | 2.9  | 1110.0525 | 2 | 36.48 | 1        | F1:1705 | OB5921 H2 raw.raw  | 3.5597E5        | 2        | 2                   | 464   | 482 |                                       |                                                                               | PEAKS DB  |
| R.FNLAGKQEQLR.Y                 | Y    | 65.24  | 1578.8154 | 13     | -0.1 | 790.4149  | 2 | 30.90 | 8        | F8:1458 | OB5935 H3B raw.raw | 2.0874E4        | 1        | 1                   | 194   | 206 |                                       |                                                                               | PEAKS DB  |
| V.PQNFAVAAS                     | N    | 51.55  | 944.5079  | 9      | 0.5  | 473.2615  | 2 | 32.25 | 6        | F6:1586 | OB5933 H2 raw.raw  | 2.3208E6        | 2        | 2                   | 403   | 411 |                                       |                                                                               | PEAKS DB  |
| R.L(+57.02)GLSAEYGSIH.R         | Y    | 50.42  | 1358.6942 | 12     | 0.7  | 680.3549  | 2 | 29.11 | 5        | F5:1370 | OB5932 H2 raw.raw  | 4.4143E4        | 2        | 2                   | 343   | 354 | Carbamidomethylation (DHKE, X@N-term) | L1:Carbamidomethylation (DHKE, X@N-term):52.68                                | PEAKS PTM |
| N.G(+57.02)IETIC(+57.02)TATVK.M | N    | 46.95  | 1377.6809 | 12     | 0.2  | 689.8479  | 2 | 29.76 | 1        | F1:1306 | OB5921 H2 raw.raw  | 0               | 0        | 0                   | 299   | 310 | Carbamidomethylation                  | G1:Carbamidomethylation (DHKE, X@N-term):5.03;C7:Carbamidomethylation:1000.00 | PEAKS PTM |
| total 14 peptides               |      |        |           |        |      |           |   |       |          |         |                    |                 |          |                     |       |     |                                       |                                                                               |           |

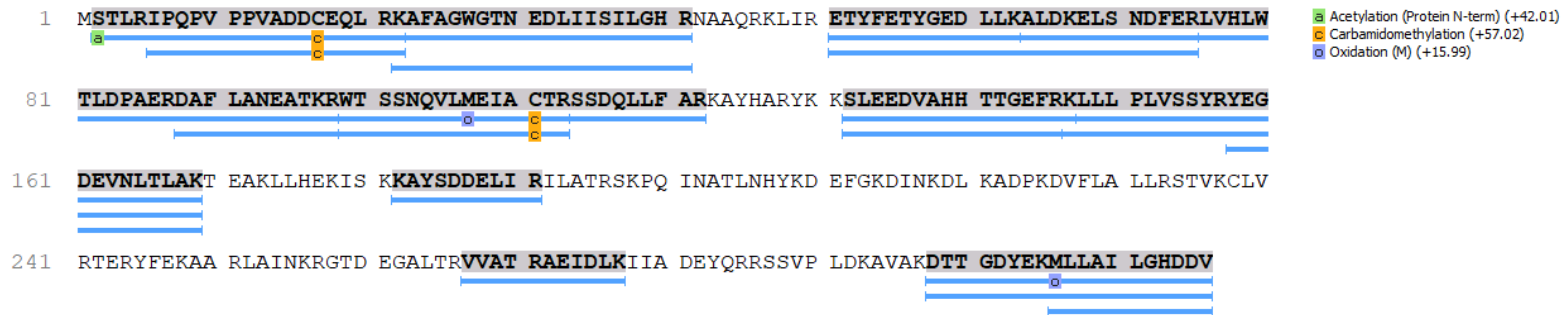

Supporting Peptides:

| Peptide                       | Uniq | -10lgP | Mass      | Length | ppm  | m/z       | z | RT    | Fraction | Scan     | Source File        | Area Raw in gel | #Feature | #Feature Raw in gel | Start | End | PTM                  | AScore                           | Found By |
|-------------------------------|------|--------|-----------|--------|------|-----------|---|-------|----------|----------|--------------------|-----------------|----------|---------------------|-------|-----|----------------------|----------------------------------|----------|
| K.AFAGWGTNEDLIISILGHR.N       | Y    | 109.17 | 2069.0693 | 19     | 2.6  | 1035.5447 | 2 | 37.54 | 11       | F11:1909 | OB5938 H3A raw.raw | 2.0436E7        | 6        | 6                   | 23    | 41  |                      |                                  | PEAKS DB |
| K.LLLPLVSSYRYEGDEVNLTAK.T     | Y    | 106.30 | 2492.3525 | 22     | -3.4 | 1247.1793 | 2 | 35.69 | 10       | F10:1789 | OB5937 H3A raw.raw | 1.2701E7        | 5        | 5                   | 148   | 169 |                      |                                  | PEAKS DB |
| R.KAFAGWGTNEDLIISILGHR.N      | Y    | 98.47  | 2197.1643 | 20     | 1.8  | 733.3967  | 3 | 36.03 | 11       | F11:1820 | OB5938 H3A raw.raw | 1.1777E6        | 3        | 3                   | 22    | 41  |                      |                                  | PEAKS DB |
| K.DTTGDYEKM(+15.99)LLAILGHDDV | Y    | 89.67  | 2120.9937 | 19     | 2.8  | 1061.5071 | 2 | 37.52 | 10       | F10:1899 | OB5937 H3A raw.raw | 1.7507E6        | 3        | 3                   | 298   | 316 | Oxidation (M)        | M9:Oxidation (M):1000.00         | PEAKS DB |
| K.DTTGDYEKMLLAILGHDDV         | Y    | 88.82  | 2104.9985 | 19     | 2.6  | 1053.5093 | 2 | 39.41 | 10       | F10:2009 | OB5937 H3A raw.raw | 2.9926E6        | 3        | 3                   | 298   | 316 |                      |                                  | PEAKS DB |
| K.SLEEDVAHHTTGEFR.K           | Y    | 80.77  | 1726.7910 | 15     | 0.2  | 576.6044  | 3 | 30.69 | 9        | F9:1462  | OB5936 H3A raw.raw | 3.5275E5        | 3        | 3                   | 132   | 146 |                      |                                  | PEAKS DB |
| K.KAYSDDLEIR.I                | Y    | 80.11  | 1208.6036 | 10     | -0.8 | 605.3086  | 2 | 26.68 | 10       | F10:1249 | OB5937 H3A raw.raw | 2.4558E4        | 3        | 3                   | 182   | 191 |                      |                                  | PEAKS DB |
| R.KLLLPLVSSYRYEGDEVNLTAK.T    | Y    | 79.99  | 2620.4475 | 23     | -2.9 | 874.4872  | 3 | 34.56 | 11       | F11:1723 | OB5938 H3A raw.raw | 1.5288E6        | 3        | 3                   | 147   | 169 |                      |                                  | PEAKS DB |
| R.IPQVPVPVADDC(+57.02)EQLRK.A | Y    | 77.43  | 1961.0040 | 17     | 1.9  | 654.6765  | 3 | 28.76 | 10       | F10:1372 | OB5937 H3A raw.raw | 8.3045E5        | 3        | 3                   | 6     | 22  | Carbamidomethylation | C12:Carbamidomethylation:1000.00 | PEAKS DB |
| K.ALDKELSNDFER.L              | Y    | 76.95  | 1435.6942 | 12     | 0.7  | 718.8549  | 2 | 28.58 | 10       | F10:1373 | OB5937 H3A raw.raw | 8.7943E4        | 3        | 3                   | 64    | 75  |                      |                                  | PEAKS DB |
| K.SLEEDVAHHTTGEFRK.L          | Y    | 75.68  | 1854.8860 | 16     | 0.2  | 619.3027  | 3 | 28.20 | 10       | F10:1348 | OB5937 H3A raw.raw | 1.8944E5        | 2        | 2                   | 132   | 147 |                      |                                  | PEAKS DB |
| K.MLLAILGHDDV                 | Y    | 74.32  | 1195.6271 | 11     | 1.2  | 598.8215  | 2 | 35.57 | 10       | F10:1777 | OB5937 H3A raw.raw | 1.4911E6        | 3        | 3                   | 306   | 316 |                      |                                  | PEAKS DB |
| R.SSDQLLFAR.K                 | Y    | 74.10  | 1035.5349 | 9      | 1.4  | 518.7755  | 2 | 30.46 | 10       | F10:1477 | OB5937 H3A raw.raw | 3.9148E5        | 3        | 3                   | 114   | 122 |                      |                                  | PEAKS DB |
| R.ETYFETYGEDLLKALDKELSNDFER.L | Y    | 70.40  | 3024.4238 | 25     | 2.4  | 1009.1509 | 3 | 40.92 | 10       | F10:2098 | OB5937 H3A raw.raw | 9.7793E5        | 2        | 2                   | 51    | 75  |                      |                                  | PEAKS DB |
| R.YEGDEVNLTAK.T               | Y    | 70.18  | 1350.6666 | 12     | 1.3  | 676.3415  | 2 | 29.90 | 11       | F11:1464 | OB5938 H3A raw.raw | 1.4769E4        | 1        | 1                   | 158   | 169 |                      |                                  | PEAKS DB |
| R.ETYFETYGEDLLK.A             | Y    | 64.75  | 1606.7402 | 13     | -5.6 | 804.3729  | 2 | 36.83 | 9        | F9:1834  | OB5936 H3A raw.raw | 3.134E5         | 2        | 2                   | 51    | 63  |                      |                                  | PEAKS DB |
| R.WTSSNQVLMEIAC(+57.02)TR.S   | Y    | 64.68  | 1794.8394 | 15     | 1.8  | 898.4286  | 2 | 36.10 | 9        | F9:1791  | OB5936 H3A raw.raw | 2.4676E5        | 1        | 1                   | 99    | 113 | Carbamidomethylation | C13:Carbamidomethylation:1000.00 | PEAKS DB |
| total 22 peptides             |      |        |           |        |      |           |   |       |          |          |                    |                 |          |                     |       |     |                      |                                  |          |

| Peptide                                   | Uniq | -10lgP | Mass      | Length | ppm  | m/z      | z | RT    | Fraction | Scan     | Source File        | Area Raw in gel | #Feature | #Feature Raw in gel | Start | End | PTM                                                | AScore                                                                   | Found By  |
|-------------------------------------------|------|--------|-----------|--------|------|----------|---|-------|----------|----------|--------------------|-----------------|----------|---------------------|-------|-----|----------------------------------------------------|--------------------------------------------------------------------------|-----------|
| R.WTSSNQVLM(+15.99)EIAC(+57.02)TR.S       | Y    | 60.30  | 1810.8342 | 15     | 1.3  | 906.4255 | 2 | 35.18 | 9        | F9:1732  | OB5936 H3A raw.raw | 7.2086E4        | 2        | 2                   | 99    | 113 | Oxidation (M); Carbamidomethylation                | M9:Oxidation (M):1000.00; C13:Carbamidomethylation:1000.00               | PEAKS DB  |
| R.LVHLWLTDPAERDAFLANEATKR.W               | Y    | 60.13  | 2665.3975 | 23     | -0.7 | 667.3562 | 4 | 33.46 | 10       | F10:1665 | OB5937 H3A raw.raw | 4.8836E5        | 3        | 3                   | 76    | 98  |                                                    |                                                                          | PEAKS DB  |
| M.S(+42.01)TLRIPQVPVPVADDC(+57.02)EQLRK.A | Y    | 57.11  | 2460.2795 | 21     | 0.9  | 821.1012 | 3 | 33.70 | 9        | F9:1644  | OB5936 H3A raw.raw | 1.4069E5        | 1        | 1                   | 2     | 22  | Acetylation (Protein N-term); Carbamidomethylation | S1:Acetylation (Protein N-term):1000.00;C16:Carbamidomethylation:1000.00 | PEAKS PTM |
| R.VVATRAEIDLK.I                           | Y    | 39.64  | 1213.7030 | 11     | -1.0 | 607.8582 | 2 | 27.01 | 11       | F11:1285 | OB5938 H3A raw.raw | 4.1122E3        | 1        | 1                   | 267   | 277 |                                                    |                                                                          | PEAKS DB  |
| R.DAFLANEATKR.W                           | Y    | 36.75  | 1234.6306 | 11     | -0.8 | 618.3221 | 2 | 26.52 | 11       | F11:1255 | OB5938 H3A raw.raw | 0               | 0        | 0                   | 88    | 98  |                                                    |                                                                          | PEAKS DB  |
| total 22 peptides                         |      |        |           |        |      |          |   |       |          |          |                    |                 |          |                     |       |     |                                                    |                                                                          |           |

A0A0A6ZDP1|A0A0A6ZDP1\_ARAHY

back to list

| Protein Coverage | Supporting Peptides |

Protein Coverage:

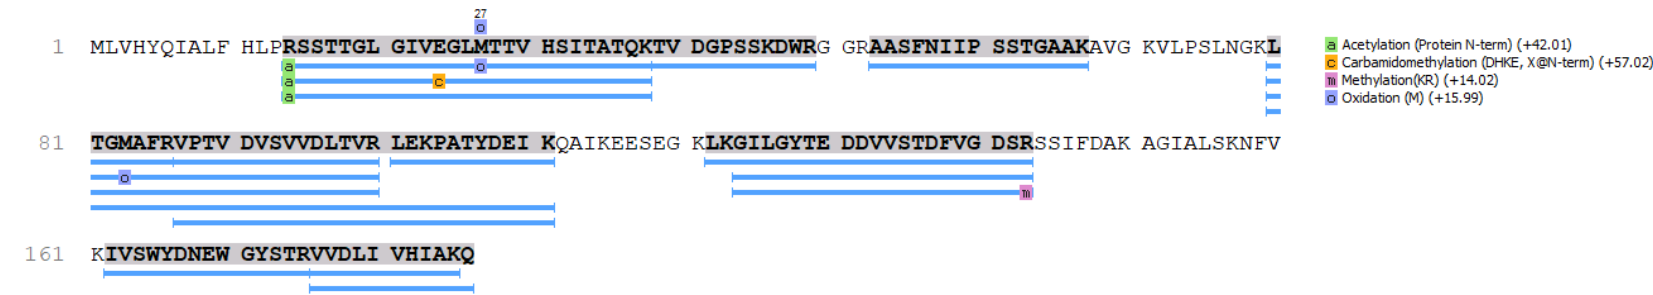

Supporting Peptides:

| Peptide                           | Uniq | -10lgP | Mass      | Length | ppm  | m/z       | z | RT    | Fraction | Scan     | Source File        | Area Raw in gel | #Feature | #Feature Raw in gel | Start | End | PTM           | AScore                                         | Found By  |
|-----------------------------------|------|--------|-----------|--------|------|-----------|---|-------|----------|----------|--------------------|-----------------|----------|---------------------|-------|-----|---------------|------------------------------------------------|-----------|
| K.GILGYTEDDVSTDFVGDSR.S           | Y    | 125.67 | 2143.9910 | 20     | 3.6  | 1073.0066 | 2 | 34.92 | 10       | F10:1742 | OB5937 H3A raw.raw | 1.9799E7        | 10       | 10                  | 124   | 143 |               |                                                | PEAKS DB  |
| K.IVSWYDNEWGYSTR.V                | N    | 119.02 | 1774.7950 | 14     | 1.6  | 888.4062  | 2 | 33.83 | 11       | F11:1692 | OB5938 H3A raw.raw | 2.0685E6        | 3        | 3                   | 162   | 175 |               |                                                | PEAKS DB  |
| R.VPTVDVSVVDLTVR.L                | N    | 109.01 | 1497.8402 | 14     | 0.8  | 749.9280  | 2 | 34.01 | 11       | F11:1703 | OB5938 H3A raw.raw | 2.6396E6        | 3        | 3                   | 87    | 100 |               |                                                | PEAKS DB  |
| R.VVDLIVHIAKQ                     | Y    | 91.25  | 1233.7445 | 11     | 1.5  | 617.8804  | 2 | 30.45 | 11       | F11:1480 | OB5938 H3A raw.raw | 1.4659E6        | 6        | 6                   | 176   | 186 |               |                                                | PEAKS DB  |
| K.LKGILGYTEDDVSTDFVGDSR.S         | Y    | 89.73  | 2385.1699 | 22     | 1.5  | 796.0651  | 3 | 33.83 | 11       | F11:1688 | OB5938 H3A raw.raw | 1.1517E6        | 2        | 2                   | 122   | 143 |               |                                                | PEAKS DB  |
| R.AASFNIIPSSTGAAK.A               | N    | 84.99  | 1433.7513 | 15     | 2.0  | 717.8844  | 2 | 31.01 | 10       | F10:1503 | OB5937 H3A raw.raw | 5.133E6         | 5        | 5                   | 53    | 67  |               |                                                | PEAKS DB  |
| K.LTGMARFVPTVDVSVVDLTVR.L         | N    | 83.77  | 2274.2405 | 21     | -2.6 | 1138.1245 | 2 | 36.04 | 10       | F10:1813 | OB5937 H3A raw.raw | 1.7435E6        | 4        | 4                   | 80    | 100 |               |                                                | PEAKS DB  |
| K.LTGM(+15.99)AFRVPTVDVSVVDLTVR.L | N    | 80.37  | 2290.2354 | 21     | -5.6 | 764.4148  | 3 | 36.83 | 9        | F9:1833  | OB5936 H3A raw.raw | 1.375E6         | 4        | 4                   | 80    | 100 | Oxidation (M) | M4:Oxidation (M):1000.00                       | PEAKS DB  |
| K.G(+57.02)ILGYTEDDVSTDFVGDSR.S   | Y    | 75.68  | 2201.0125 | 20     | 1.2  | 1101.5148 | 2 | 34.92 | 10       | F10:1752 | OB5937 H3A raw.raw | 7.1244E4        | 1        | 1                   | 124   | 143 |               | G1:Carbamidomethylation (DHKE, X@N-term):30.02 | PEAKS PTM |
| total 19 peptides                 |      |        |           |        |      |           |   |       |          |          |                    |                 |          |                     |       |     |               |                                                |           |

[illegible][back to list](#)

### Protein Coverage:

- c Carbamidomethylation (+57.02)
- d Deamidation (NQ) (+0.98)
- e Ethylation (+28.03)
- p Pyro-glu from Q (-17.03)
- r Replacement of 2 protons by iron (+53.92)

| Peptide         | Uniq | -10lgP | Mass      | Length | ppm | m/z      | z | RT    | Fraction | Scan    | Source File       | Area Raw in gel | #Feature | #Feature Raw in gel | Start | End | PTM | AScore | Found By |
|-----------------|------|--------|-----------|--------|-----|----------|---|-------|----------|---------|-------------------|-----------------|----------|---------------------|-------|-----|-----|--------|----------|
| K.SQSENFYVAFK.T | N    | 113.90 | 1447.6619 | 12     | 1.7 | 724.8394 | 2 | 31.69 | 5        | F5:1516 | OB5932 H2 raw.raw | 1.027E7         | 4        | 4                   | 436   | 447 |     |        | PEAKS DB |

PEARS  
DB

| Peptide                                  | Uniq | -10lgP | Mass      | Length | ppm  | m/z       | z | RT    | Fraction | Scan     | Source File        | Area Raw in gel | #Feature | #Feature Raw in gel | Start | End | PTM                              | AScore                                         | Found By  |
|------------------------------------------|------|--------|-----------|--------|------|-----------|---|-------|----------|----------|--------------------|-----------------|----------|---------------------|-------|-----|----------------------------------|------------------------------------------------|-----------|
| R.NRSPDIYNPQAGSLK.T                      | N    | 110.81 | 1658.8376 | 15     | 0.4  | 830.4265  | 2 | 27.80 | 5        | F5:1285  | OB5932 H2 raw.raw  | 8.3597E5        | 6        | 6                   | 340   | 354 |                                  |                                                | PEAKS DB  |
| R.RPFYSNAPQEIFIQQGR.G                    | N    | 110.68 | 2050.0383 | 17     | 2.3  | 1026.0288 | 2 | 31.40 | 11       | F11:1547 | OB5938 H3A raw.raw | 1.6392E6        | 11       | 11                  | 59    | 75  |                                  |                                                | PEAKS DB  |
| R.VYDEELQEGHVLVVPQNFAVAGK.S              | N    | 103.27 | 2540.2910 | 23     | 2.1  | 847.7727  | 3 | 32.93 | 1        | F1:1498  | OB5921 H2 raw.raw  | 1.5993E6        | 6        | 6                   | 413   | 435 |                                  |                                                | PEAKS DB  |
| R.SPDIYNPQAGSLK.T                        | N    | 87.71  | 1388.6936 | 13     | 2.2  | 695.3556  | 2 | 28.73 | 5        | F5:1375  | OB5932 H2 raw.raw  | 1.3705E6        | 3        | 3                   | 342   | 354 |                                  |                                                | PEAKS DB  |
| R.SPDIYNPQAGSLKTANDLNLLILR.W             | N    | 81.29  | 2625.4126 | 24     | 0.2  | 876.1450  | 3 | 35.24 | 5        | F5:1743  | OB5932 H2 raw.raw  | 1.5604E5        | 1        | 1                   | 342   | 365 |                                  |                                                | PEAKS DB  |
| R.AHVQVVDSDNGNRVYDEELQEGHVLVVPQNFAVAGK.S | N    | 72.39  | 3816.9182 | 35     | 3.0  | 1273.3171 | 3 | 32.25 | 5        | F5:1561  | OB5932 H2 raw.raw  | 3.9867E6        | 2        | 2                   | 401   | 435 |                                  |                                                | PEAKS DB  |
| R.NALRRPFYSNAPQEIFIQQGR.G                | N    | 68.46  | 2504.3037 | 21     | 1.1  | 835.7761  | 3 | 31.58 | 10       | F10:1548 | OB5937 H3A raw.raw | 9.3975E5        | 4        | 4                   | 55    | 75  |                                  |                                                | PEAKS DB  |
| K.TANDLNLLILR.W                          | N    | 67.99  | 1254.7296 | 11     | 0.0  | 628.3721  | 2 | 35.65 | 4        | F4:1764  | OB5931 H6 raw.raw  | 1.549E7         | 6        | 6                   | 355   | 365 |                                  |                                                | PEAKS DB  |
| V.PQNFAVAGK.S                            | N    | 67.74  | 930.4923  | 9      | 0.8  | 466.2538  | 2 | 32.44 | 5        | F5:1562  | OB5932 H2 raw.raw  | 4.3278E6        | 2        | 2                   | 427   | 435 |                                  |                                                | PEAKS DB  |
| K.FFVPPSQSPR.A                           | N    | 67.19  | 1288.6564 | 11     | 0.0  | 645.3354  | 2 | 28.51 | 1        | F1:1229  | OB5921 H2 raw.raw  | 9.0621E4        | 3        | 3                   | 494   | 504 |                                  |                                                | PEAKS DB  |
| R.S(+57.02)PDIYNPQAGSLK.T                | N    | 65.06  | 1445.7150 | 13     | 5.4  | 723.8687  | 2 | 28.54 | 6        | F6:1379  | OB5933 H2 raw.raw  | 8.1843E3        | 1        | 1                   | 342   | 354 |                                  | S1:Carbamidomethylation (DHKE, X@N-term):30.83 | PEAKS PTM |
| R.W(+28.03)LGPSAEYGNLYR.N                | Y    | 59.99  | 1552.7673 | 13     | 1.5  | 777.3921  | 2 | 35.79 | 5        | F5:1772  | OB5932 H2 raw.raw  | 1.4756E6        | 3        | 3                   | 366   | 378 | Ethylation                       | W1:Ethylation:51.01                            | PEAKS PTM |
| K.TAN(+.98)DLNLLILR.W                    | N    | 54.07  | 1255.7136 | 11     | -1.0 | 628.8635  | 2 | 35.40 | 6        | F6:1771  | OB5933 H2 raw.raw  | 0               | 0        | 0                   | 355   | 365 | Deamidation (NQ)                 | N3:Deamidation (NQ):68.31                      | PEAKS DB  |
| K.TAND(+53.92)LNLLILR.W                  | N    | 47.26  | 1308.6488 | 11     | -1.1 | 655.3309  | 2 | 34.62 | 1        | F1:1597  | OB5921 H2 raw.raw  | 1.4902E5        | 1        | 1                   | 355   | 365 | Replacement of 2 protons by iron | D4:Replacement of 2 protons by iron:128.79     | PEAKS PTM |
| R.SLPYSPY(+31.99)SPQSQPR.Q               | N    | 46.01  | 1637.7686 | 14     | 1.0  | 819.8923  | 2 | 29.76 | 9        | F9:1401  | OB5936 H3A raw.raw | 3.8534E4        | 1        | 1                   | 197   | 210 |                                  | Y7:Dihydroxy:0.00                              | PEAKS PTM |
| R.QQPEENAC(+57.02)QFQR.L                 | N    | 45.72  | 1533.6630 | 12     | 1.7  | 767.8401  | 2 | 25.17 | 10       | F10:1164 | OB5937 H3A raw.raw | 6.6881E3        | 2        | 2                   | 2     | 13  | Carbamidomethylation             | C8:Carbamidomethylation:1000.00                | PEAKS DB  |
| K.FFVPPSQSPRA.V                          | N    | 44.09  | 1359.6935 | 12     | 3.4  | 680.8563  | 2 | 29.07 | 1        | F1:1270  | OB5921 H2 raw.raw  | 1.1159E4        | 1        | 1                   | 494   | 505 |                                  |                                                | PEAKS DB  |
| R.QLKNNNPFK.F                            | N    | 41.09  | 1101.5930 | 9      | -0.6 | 551.8035  | 2 | 27.25 | 6        | F6:1282  | OB5933 H2 raw.raw  | 1.2465E4        | 2        | 2                   | 485   | 493 |                                  |                                                | PEAKS DB  |
| R.Q(-17.03)LKNNNPFK.F                    | N    | 37.25  | 1084.5665 | 9      | 0.4  | 543.2908  | 2 | 28.36 | 6        | F6:1357  | OB5933 H2 raw.raw  | 1.237E4         | 1        | 1                   | 485   | 493 | Pyro-glu from Q                  | Q1:Pyro-glu from Q:100.0.00                    | PEAKS PTM |

total 20 peptides

ASZ1R0|ASZ1R0\_ARAHY

back to list

| Protein Coverage | Supporting Peptides |

Protein Coverage:

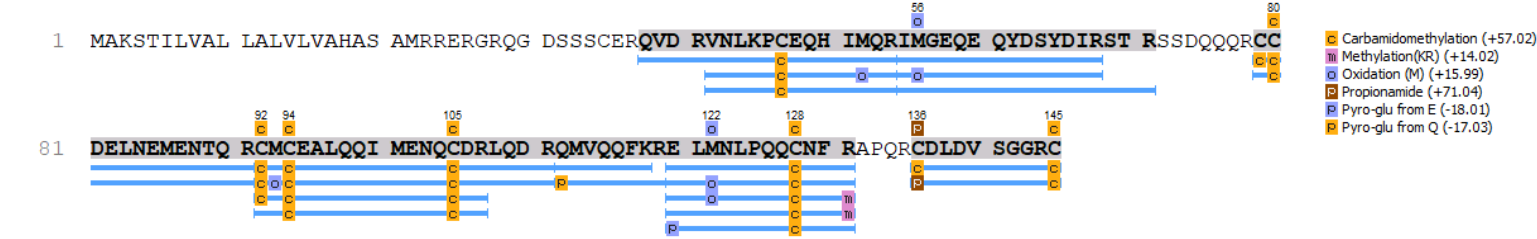

Supporting Peptides:

| Peptide | Uniq | -10lgP | Mass | Length | ppm | m/z | z | RT | Fraction | Scan | Source File | Area Raw in gel | #Feature | #Feature Raw in gel | Start | End | PTM | AScore | Found By |
|---------|------|--------|------|--------|-----|-----|---|----|----------|------|-------------|-----------------|----------|---------------------|-------|-----|-----|--------|----------|
|---------|------|--------|------|--------|-----|-----|---|----|----------|------|-------------|-----------------|----------|---------------------|-------|-----|-----|--------|----------|

total 30 peptides

| Peptide                                          | Uniq | -10lgP | Mass      | Length | ppm  | m/z       | z | RT    | Fraction | Scan    | Source File       | Area Raw in gel | #Feature | #Feature Raw in gel | Start | End | PTM                                   | AScore                                                                                           | Found By  |
|--------------------------------------------------|------|--------|-----------|--------|------|-----------|---|-------|----------|---------|-------------------|-----------------|----------|---------------------|-------|-----|---------------------------------------|--------------------------------------------------------------------------------------------------|-----------|
| R.IM(+15.99)GEQEQYDSYDIR.S                       | Y    | 134.01 | 1761.7516 | 14     | 2.3  | 881.8851  | 2 | 29.04 | 3        | F3:1368 | OB5930 H6 raw.raw | 1.9274E6        | 3        | 3                   | 55    | 68  | Oxidation (M)                         | M2:Oxidation (M):1000.00                                                                         | PEAKS DB  |
| R.IMGEQEQYDSYDIR.S                               | Y    | 115.59 | 1745.7566 | 14     | 3.8  | 873.8889  | 2 | 30.72 | 4        | F4:1483 | OB5931 H6 raw.raw | 8.9499E6        | 22       | 22                  | 55    | 68  |                                       |                                                                                                  | PEAKS DB  |
| R.ELMNLPPQC(+57.02)NFR.A                         | Y    | 114.35 | 1548.7177 | 12     | 2.7  | 775.3682  | 2 | 31.64 | 3        | F3:1514 | OB5930 H6 raw.raw | 6.3372E6        | 11       | 11                  | 120   | 131 | Carbamidomethylation                  | C9:Carbamidomethylation:1000.00                                                                  | PEAKS DB  |
| R.C(+57.02)MC(+57.02)EALQQIMENQC(+57.02)DR.L     | Y    | 106.38 | 2084.8206 | 16     | 1.8  | 1043.4194 | 2 | 34.38 | 3        | F3:1680 | OB5930 H6 raw.raw | 4.3323E4        | 3        | 3                   | 92    | 107 | Carbamidomethylation                  | C1:Carbamidomethylation:1000.00;C3:Carbamidomethylation:1000.00;C14:Carbamidomethylation:1000.00 | PEAKS DB  |
| R.ELM(+15.99)NLPQQC(+57.02)NFR.A                 | Y    | 98.80  | 1564.7126 | 12     | 1.2  | 783.3645  | 2 | 29.23 | 3        | F3:1369 | OB5930 H6 raw.raw | 8.8493E5        | 2        | 2                   | 120   | 131 | Oxidation (M); Carbamidomethylation   | M3:Oxidation (M):1000.00;C9:Carbamidomethylation:1000.00                                         | PEAKS DB  |
| R.C(+57.02)C(+57.02)DELNEMENTQR.C                | Y    | 87.55  | 1697.6444 | 13     | 0.4  | 849.8298  | 2 | 28.32 | 4        | F4:1334 | OB5931 H6 raw.raw | 1.0555E5        | 2        | 2                   | 79    | 91  | Carbamidomethylation                  | C1:Carbamidomethylation:1000.00;C2:Carbamidomethylation:1000.00                                  | PEAKS DB  |
| R.VNLKPC(+57.02)EQHIMQR.I                        | Y    | 80.09  | 1651.8286 | 13     | 0.7  | 551.6172  | 3 | 31.53 | 4        | F4:1544 | OB5931 H6 raw.raw | 1.0842E6        | 5        | 5                   | 42    | 54  | Carbamidomethylation                  | C6:Carbamidomethylation:1000.00                                                                  | PEAKS DB  |
| R.C(+57.02)DLDSVGGRC(+57.02)                     | Y    | 79.02  | 1137.4543 | 10     | 0.3  | 569.7346  | 2 | 25.66 | 4        | F4:1179 | OB5931 H6 raw.raw | 1.5785E4        | 2        | 2                   | 136   | 145 | Carbamidomethylation                  | C1:Carbamidomethylation:1000.00;C10:Carbamidomethylation:1000.00                                 | PEAKS DB  |
| R.C(+57.02)C(+57.02)DELNEMENTQ(+.98)R.C          | Y    | 74.70  | 1698.6284 | 13     | 1.2  | 850.3225  | 2 | 28.66 | 3        | F3:1327 | OB5930 H6 raw.raw | 1.5687E5        | 2        | 2                   | 79    | 91  | Carbamidomethylation                  | C1:Carbamidomethylation:1000.00;C2:Carbamidomethylation:1000.00;Q12:Deamidation (NQ):36.05       | PEAKS DB  |
| R.C(+57.02)MC(+57.02)EALQQIMENQC(+57.02)DRLQDR.Q | Y    | 71.18  | 2597.0913 | 20     | 1.7  | 866.7058  | 3 | 35.32 | 3        | F3:1730 | OB5930 H6 raw.raw | 2.1123E6        | 5        | 5                   | 92    | 111 | Carbamidomethylation                  | C1:Carbamidomethylation:1000.00;C3:Carbamidomethylation:1000.00;C14:Carbamidomethylation:1000.00 | PEAKS DB  |
| R.C(+71.04)C(+57.02)DELNEMENTQR.C                | Y    | 68.78  | 1711.6600 | 13     | 0.6  | 856.8378  | 2 | 28.19 | 3        | F3:1295 | OB5930 H6 raw.raw | 1.0694E5        | 2        | 2                   | 79    | 91  | Carbamidomethylation                  | C1:Propionamide:10.11;C2:Carbamidomethylation:1000.00                                            | PEAKS PTM |
| R.C(+71.04)MC(+57.02)EALQQIMENQC(+57.02)DR.L     | Y    | 59.70  | 2098.8362 | 16     | 3.5  | 1050.4291 | 2 | 34.40 | 3        | F3:1687 | OB5930 H6 raw.raw | 0               | 0        | 0                   | 92    | 107 | Carbamidomethylation                  | C1:Propionamide:22.85;C3:Carbamidomethylation:1000.00;C14:Carbamidomethylation:1000.00           | PEAKS PTM |
| R.C(+71.04)DLDSVGGRC(+57.02)                     | Y    | 58.84  | 1151.4700 | 10     | -1.5 | 576.7414  | 2 | 25.98 | 4        | F4:1198 | OB5931 H6 raw.raw | 2.0402E3        | 1        | 1                   | 136   | 145 | Propionamide; Carbamidomethylation    | C1:Propionamide:106.68;C10:Carbamidomethylation:1000.00                                          | PEAKS PTM |
| R.Q(-17.03)MVQQFKR.E                             | Y    | 54.35  | 1046.5331 | 8      | -1.0 | 524.2733  | 2 | 28.52 | 4        | F4:1323 | OB5931 H6 raw.raw | 1.3333E5        | 2        | 2                   | 112   | 119 | Pyro-glu from Q                       | Q1:Pyro-glu from Q:1000.00                                                                       | PEAKS PTM |
| R.C(+57.02)(+28.03)C(+57.02)DELNEMENTQR.C        | Y    | 53.62  | 1725.6757 | 13     | 0.1  | 863.8452  | 2 | 28.26 | 3        | F3:1306 | OB5930 H6 raw.raw | 1.2726E4        | 2        | 2                   | 79    | 91  | Carbamidomethylation                  | C1:Carbamidomethylation:1000.00;C1:Ethylation:13.67;C2:Carbamidomethylation:1000.00              | PEAKS PTM |
| R.IMGEQE(+21.98)QYDSYDIR.S                       | Y    | 52.44  | 1767.7385 | 14     | 1.6  | 884.8780  | 2 | 30.42 | 3        | F3:1450 | OB5930 H6 raw.raw | 0               | 0        | 0                   | 55    | 68  |                                       | E6:Sodium adduct:12.81                                                                           | PEAKS PTM |
| R.ELMNLPPQC(+57.02)NFR(+14.02).A                 | Y    | 46.74  | 1562.7334 | 12     | 1.5  | 782.3751  | 2 | 32.08 | 4        | F4:1543 | OB5931 H6 raw.raw | 2.0814E5        | 2        | 2                   | 120   | 131 | Carbamidomethylation; Methylation(KR) | C9:Carbamidomethylation:1000.00;R12:Methylation(KR):1000.00                                      | PEAKS PTM |
| R.IMGEQE(+.98)YDSYDIR.S                          | Y    | 46.05  | 1746.7406 | 14     | 5.7  | 874.3826  | 2 | 40.55 | 4        | F4:2044 | OB5931 H6 raw.raw | 0               | 0        | 0                   | 55    | 68  |                                       | Q7:Deamidation (NQ):0.00                                                                         | PEAKS DB  |
| total 30 peptides                                |      |        |           |        |      |           |   |       |          |         |                   |                 |          |                     |       |     |                                       |                                                                                                  |           |

| Peptide                                                  | Uniq | -10lgP | Mass      | Length | ppm  | m/z       | z | RT    | Fraction | Scan    | Source File       | Area Raw in gel | #Feature | #Feature Raw in gel | Start | End | PTM                                                  | AScore                                                                                                                    | Found By  |
|----------------------------------------------------------|------|--------|-----------|--------|------|-----------|---|-------|----------|---------|-------------------|-----------------|----------|---------------------|-------|-----|------------------------------------------------------|---------------------------------------------------------------------------------------------------------------------------|-----------|
| R.QMVQQFK.R                                              | Y    | 45.99  | 907.4586  | 7      | -0.4 | 454.7364  | 2 | 26.12 | 3        | F3:1199 | OB5930 H6 raw.raw | 9.8252E3        | 2        | 2                   | 112   | 118 |                                                      |                                                                                                                           | PEAKS DB  |
| R.E(-18.01)LMNLPQQC(+57.02)NFR.A                         | Y    | 44.04  | 1530.7072 | 12     | 1.2  | 766.3618  | 2 | 35.00 | 3        | F3:1722 | OB5930 H6 raw.raw | 0               | 0        | 0                   | 120   | 131 | Pyro-glu from E; Carbamidomethylation                | E1:Pyro-glu from E:1000.00;C9:Carbamidomethylation:1000.00                                                                | PEAKS PTM |
| R.IMGEQEYDSY(-18.01)DIR.S                                | Y    | 41.86  | 1727.7461 | 14     | 2.3  | 864.8823  | 2 | 31.01 | 3        | F3:1485 | OB5930 H6 raw.raw | 0               | 0        | 0                   | 55    | 68  |                                                      | Y11:Dehydration:0.00                                                                                                      | PEAKS PTM |
| R.C(+57.02)M(+15.99)C(+57.02)EALQQIMENQC(+57.02)DR.L     | Y    | 41.40  | 2100.8157 | 16     | 6.8  | 1051.4222 | 2 | 32.37 | 4        | F4:1570 | OB5931 H6 raw.raw | 0               | 0        | 0                   | 92    | 107 | Carbamidomethylation                                 | C1:Carbamidomethylation:1000.00;M2:Oxidation (M):43.13;C3:Carbamidomethylation:1000.00;C14:Carbamidomethylation:1000.00   | PEAKS DB  |
| R.VNLKPC(+57.02)EQHIM(+15.99)QR.I                        | Y    | 41.03  | 1667.8236 | 13     | 1.8  | 556.9495  | 3 | 28.32 | 4        | F4:1320 | OB5931 H6 raw.raw | 3.1777E4        | 2        | 2                   | 42    | 54  | Carbamidomethylation; Oxidation (M)                  | C6:Carbamidomethylation:1000.00;M11:Oxidation (M):1000.00                                                                 | PEAKS DB  |
| R.IMGEQEYDSYDIRSTR.S                                     | Y    | 40.39  | 2089.9375 | 17     | 1.4  | 697.6541  | 3 | 30.22 | 4        | F4:1428 | OB5931 H6 raw.raw | 2.3182E4        | 1        | 1                   | 55    | 71  |                                                      |                                                                                                                           | PEAKS DB  |
| R.C(+57.02)M(+15.99)C(+57.02)EALQQIMENQC(+57.02)DRLQDR.Q | Y    | 38.06  | 2613.0862 | 20     | -1.3 | 872.0349  | 3 | 33.74 | 4        | F4:1642 | OB5931 H6 raw.raw | 2.8827E5        | 2        | 2                   | 92    | 111 | Carbamidomethylation; Oxidation (M)                  | C1:Carbamidomethylation:1000.00;M2:Oxidation (M):55.71;C3:Carbamidomethylation:1000.00;C14:Carbamidomethylation:1000.00   | PEAKS DB  |
| R.QVDRVNLKPC(+57.02)EQHIMQR.I                            | Y    | 36.67  | 2150.0837 | 17     | -0.7 | 538.5278  | 4 | 33.49 | 3        | F3:1625 | OB5930 H6 raw.raw | 2.7618E4        | 1        | 1                   | 38    | 54  | Carbamidomethylation                                 | C10:Carbamidomethylation:1000.00                                                                                          | PEAKS DB  |
| R.ELM(+15.99)NLPQQC(+57.02)NFR(+14.02).A                 | Y    | 35.50  | 1578.7283 | 12     | 0.4  | 790.3717  | 2 | 29.78 | 4        | F4:1404 | OB5931 H6 raw.raw | 8.1416E3        | 1        | 1                   | 120   | 131 | Oxidation (M); Carbamidomethylation; Methylation(KR) | M3:Oxidation (M):1000.00;C9:Carbamidomethylation:1000.00;R12:Methylation(KR):1000.00                                      | PEAKS PTM |
| R.C(+57.02)MC(+57.02)EALQ(+.98)QIMENQC(+57.02)DRLQDR.Q   | Y    | 34.07  | 2598.0754 | 20     | 2.7  | 867.0348  | 3 | 39.74 | 3        | F3:1998 | OB5930 H6 raw.raw | 0               | 0        | 0                   | 92    | 111 | Carbamidomethylation                                 | C1:Carbamidomethylation:1000.00;C3:Carbamidomethylation:1000.00;Q7:Deamidation (NQ):0.00;C14:Carbamidomethylation:1000.00 | PEAKS DB  |
| R.IMGE(+21.98)QEYDSYDIR.S                                | Y    | 33.97  | 1767.7385 | 14     | 0.1  | 884.8766  | 2 | 30.72 | 4        | F4:1472 | OB5931 H6 raw.raw | 1.8041E4        | 1        | 1                   | 55    | 68  |                                                      | E4:Sodium adduct:17.01                                                                                                    | PEAKS PTM |
| R.IMGEQEYD(-18.01)SYDIR.S                                | Y    | 33.03  | 1727.7461 | 14     | -0.1 | 864.8802  | 2 | 31.20 | 4        | F4:1499 | OB5931 H6 raw.raw | 0               | 0        | 0                   | 55    | 68  |                                                      | D9:Dehydration:8.69                                                                                                       | PEAKS PTM |
| total 30 peptides                                        |      |        |           |        |      |           |   |       |          |         |                   |                 |          |                     |       |     |                                                      |                                                                                                                           |           |

sp|Q647G9|CONG\_ARAHY

[back to list](#)

| [Protein Coverage](#) | [Supporting Peptides](#) |

Protein Coverage:

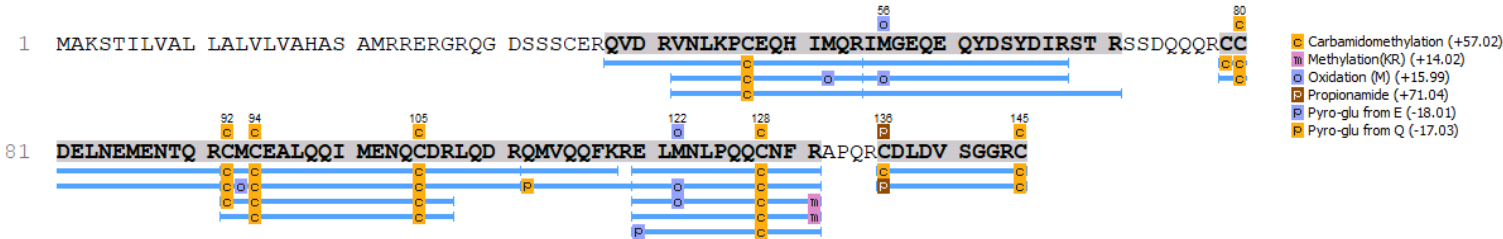



## Supporting Peptides:

| Peptide                                          | Uniq | -10lgP | Mass      | Length | ppm  | m/z       | z | RT    | Fraction | Scan    | Source File       | Area Raw in gel | #Feature | #Feature Raw in gel | Start | End | PTM                                   | AScore                                                                                           | Found By  |
|--------------------------------------------------|------|--------|-----------|--------|------|-----------|---|-------|----------|---------|-------------------|-----------------|----------|---------------------|-------|-----|---------------------------------------|--------------------------------------------------------------------------------------------------|-----------|
| R.IM(+15.99)GEQEQYDSYDIR.S                       | Y    | 134.01 | 1761.7516 | 14     | 2.3  | 881.8851  | 2 | 29.04 | 3        | F3:1368 | OB5930 H6 raw.raw | 1.9274E6        | 3        | 3                   | 55    | 68  | Oxidation (M)                         | M2:Oxidation (M):1000.00                                                                         | PEAKS DB  |
| R.IMGEQEQYDSYDIR.S                               | Y    | 115.59 | 1745.7566 | 14     | 3.8  | 873.8889  | 2 | 30.72 | 4        | F4:1483 | OB5931 H6 raw.raw | 8.9499E6        | 22       | 22                  | 55    | 68  |                                       |                                                                                                  | PEAKS DB  |
| R.ELMNLPPQC(+57.02)NFR.A                         | Y    | 114.35 | 1548.7177 | 12     | 2.7  | 775.3682  | 2 | 31.64 | 3        | F3:1514 | OB5930 H6 raw.raw | 6.3372E6        | 11       | 11                  | 120   | 131 | Carbamidomethylation                  | C9:Carbamidomethylation:1000.00                                                                  | PEAKS DB  |
| R.C(+57.02)MC(+57.02)EALQQIMENQC(+57.02)DR.L     | Y    | 106.38 | 2084.8206 | 16     | 1.8  | 1043.4194 | 2 | 34.38 | 3        | F3:1680 | OB5930 H6 raw.raw | 4.3323E4        | 3        | 3                   | 92    | 107 | Carbamidomethylation                  | C1:Carbamidomethylation:1000.00;C3:Carbamidomethylation:1000.00;C14:Carbamidomethylation:1000.00 | PEAKS DB  |
| R.ELM(+15.99)NLPQQC(+57.02)NFR.A                 | Y    | 98.80  | 1564.7126 | 12     | 1.2  | 783.3645  | 2 | 29.23 | 3        | F3:1369 | OB5930 H6 raw.raw | 8.8493E5        | 2        | 2                   | 120   | 131 | Oxidation (M); Carbamidomethylation   | M3:Oxidation (M):1000.00;C9:Carbamidomethylation:1000.00                                         | PEAKS DB  |
| R.C(+57.02)C(+57.02)DELNEMENTQR.C                | Y    | 87.55  | 1697.6444 | 13     | 0.4  | 849.8298  | 2 | 28.32 | 4        | F4:1334 | OB5931 H6 raw.raw | 1.0555E5        | 2        | 2                   | 79    | 91  | Carbamidomethylation                  | C1:Carbamidomethylation:1000.00;C2:Carbamidomethylation:1000.00                                  | PEAKS DB  |
| R.VNLKPC(+57.02)EQHIMQR.I                        | Y    | 80.09  | 1651.8286 | 13     | 0.7  | 551.6172  | 3 | 31.53 | 4        | F4:1544 | OB5931 H6 raw.raw | 1.0842E6        | 5        | 5                   | 42    | 54  | Carbamidomethylation                  | C6:Carbamidomethylation:1000.00                                                                  | PEAKS DB  |
| R.C(+57.02)DLDVSGGRC(+57.02)                     | Y    | 79.02  | 1137.4543 | 10     | 0.3  | 569.7346  | 2 | 25.66 | 4        | F4:1179 | OB5931 H6 raw.raw | 1.5785E4        | 2        | 2                   | 136   | 145 | Carbamidomethylation                  | C1:Carbamidomethylation:1000.00;C10:Carbamidomethylation:1000.00                                 | PEAKS DB  |
| R.C(+57.02)C(+57.02)DELNEMENTQ(+.98)R.C          | Y    | 74.70  | 1698.6284 | 13     | 1.2  | 850.3225  | 2 | 28.66 | 3        | F3:1327 | OB5930 H6 raw.raw | 1.5687E5        | 2        | 2                   | 79    | 91  | Carbamidomethylation                  | C1:Carbamidomethylation:1000.00;C2:Carbamidomethylation:1000.00;Q12:Deamidation (NQ):36.05       | PEAKS DB  |
| R.C(+57.02)MC(+57.02)EALQQIMENQC(+57.02)DRLQDR.Q | Y    | 71.18  | 2597.0913 | 20     | 1.7  | 866.7058  | 3 | 35.32 | 3        | F3:1730 | OB5930 H6 raw.raw | 2.1123E6        | 5        | 5                   | 92    | 111 | Carbamidomethylation                  | C1:Carbamidomethylation:1000.00;C3:Carbamidomethylation:1000.00;C14:Carbamidomethylation:1000.00 | PEAKS DB  |
| R.C(+71.04)C(+57.02)DELNEMENTQR.C                | Y    | 68.78  | 1711.6600 | 13     | 0.6  | 856.8378  | 2 | 28.19 | 3        | F3:1295 | OB5930 H6 raw.raw | 1.0694E5        | 2        | 2                   | 79    | 91  | Carbamidomethylation                  | C1:Propionamide:10.11;C2:Carbamidomethylation:1000.00                                            | PEAKS PTM |
| R.C(+71.04)MC(+57.02)EALQQIMENQC(+57.02)DR.L     | Y    | 59.70  | 2098.8362 | 16     | 3.5  | 1050.4291 | 2 | 34.40 | 3        | F3:1687 | OB5930 H6 raw.raw | 0               | 0        | 0                   | 92    | 107 | Carbamidomethylation                  | C1:Propionamide:22.85;C3:Carbamidomethylation:1000.00;C14:Carbamidomethylation:1000.00           | PEAKS PTM |
| R.C(+71.04)DLDVSGGRC(+57.02)                     | Y    | 58.84  | 1151.4700 | 10     | -1.5 | 576.7414  | 2 | 25.98 | 4        | F4:1198 | OB5931 H6 raw.raw | 2.0402E3        | 1        | 1                   | 136   | 145 | Propionamide; Carbamidomethylation    | C1:Propionamide:10.68;C10:Carbamidomethylation:1000.00                                           | PEAKS PTM |
| R.Q(-17.03)MVQQFKR.E                             | Y    | 54.35  | 1046.5331 | 8      | -1.0 | 524.2733  | 2 | 28.52 | 4        | F4:1323 | OB5931 H6 raw.raw | 1.3333E5        | 2        | 2                   | 112   | 119 | Pyro-glu from Q                       | Q1:Pyro-glu from Q:1000.00                                                                       | PEAKS PTM |
| R.C(+57.02)(+28.03)C(+57.02)DELNEMENTQR.C        | Y    | 53.62  | 1725.6757 | 13     | 0.1  | 863.8452  | 2 | 28.26 | 3        | F3:1306 | OB5930 H6 raw.raw | 1.2726E4        | 2        | 2                   | 79    | 91  | Carbamidomethylation                  | C1:Carbamidomethylation:1000.00;C1:Ethylation:13.67;C2:Carbamidomethylation:1000.00              | PEAKS PTM |
| R.IMGEQE(+21.98)QYDSYDIR.S                       | Y    | 52.44  | 1767.7385 | 14     | 1.6  | 884.8780  | 2 | 30.42 | 3        | F3:1450 | OB5930 H6 raw.raw | 0               | 0        | 0                   | 55    | 68  |                                       | E6:Sodium adduct:12.81                                                                           | PEAKS PTM |
| R.ELMNLPPQC(+57.02)NFR(+14.02).A                 | Y    | 46.74  | 1562.7334 | 12     | 1.5  | 782.3751  | 2 | 32.08 | 4        | F4:1543 | OB5931 H6 raw.raw | 2.0814E5        | 2        | 2                   | 120   | 131 | Carbamidomethylation; Methylation(KR) | C9:Carbamidomethylation:1000.00;R12:Methylation(KR):1000.00                                      | PEAKS PTM |
| total 30 peptides                                |      |        |           |        |      |           |   |       |          |         |                   |                 |          |                     |       |     |                                       |                                                                                                  |           |

| Peptide                                                  | Uniq | -10lgP | Mass      | Length | ppm  | m/z       | z | RT    | Fraction | Scan    | Source File       | Area Raw in gel | #Feature | #Feature Raw in gel | Start | End | PTM                                                  | AScore                                                                                                                    | Found By  |
|----------------------------------------------------------|------|--------|-----------|--------|------|-----------|---|-------|----------|---------|-------------------|-----------------|----------|---------------------|-------|-----|------------------------------------------------------|---------------------------------------------------------------------------------------------------------------------------|-----------|
| R.IMGEQEQ(+.98)YDSYDIR.S                                 | Y    | 46.05  | 1746.7406 | 14     | 5.7  | 874.3826  | 2 | 40.55 | 4        | F4:2044 | OB5931 H6 raw.raw | 0               | 0        | 0                   | 55    | 68  |                                                      | Q7:Deamidation (N Q):0.00                                                                                                 | PEAKS DB  |
| R.QMVQQFK.R                                              | Y    | 45.99  | 907.4586  | 7      | -0.4 | 454.7364  | 2 | 26.12 | 3        | F3:1199 | OB5930 H6 raw.raw | 9.8252E3        | 2        | 2                   | 112   | 118 |                                                      |                                                                                                                           | PEAKS DB  |
| R.E(-18.01)LMNLPQQC(+57.02)NFR.A                         | Y    | 44.04  | 1530.7072 | 12     | 1.2  | 766.3618  | 2 | 35.00 | 3        | F3:1722 | OB5930 H6 raw.raw | 0               | 0        | 0                   | 120   | 131 | Pyro-glu from E; Carbamidomethylation                | E1:Pyro-glu from E:1000.00;C9:Carbamidomethylation:1000.00                                                                | PEAKS PTM |
| R.IMGEQEQYDSY(-18.01)DIR.S                               | Y    | 41.86  | 1727.7461 | 14     | 2.3  | 864.8823  | 2 | 31.01 | 3        | F3:1485 | OB5930 H6 raw.raw | 0               | 0        | 0                   | 55    | 68  |                                                      | Y11:Dehydration:0.00                                                                                                      | PEAKS PTM |
| R.C(+57.02)M(+15.99)C(+57.02)EALQQIMENQC(+57.02)DR.L     | Y    | 41.40  | 2100.8157 | 16     | 6.8  | 1051.4222 | 2 | 32.37 | 4        | F4:1570 | OB5931 H6 raw.raw | 0               | 0        | 0                   | 92    | 107 | Carbamidomethylation                                 | C1:Carbamidomethylation:1000.00;M2:Oxidation (M):43.13;C3:Carbamidomethylation:1000.00;C14:Carbamidomethylation:1000.00   | PEAKS DB  |
| R.VNLKPC(+57.02)EQHIM(+15.99)QR.I                        | Y    | 41.03  | 1667.8236 | 13     | 1.8  | 556.9495  | 3 | 28.32 | 4        | F4:1320 | OB5931 H6 raw.raw | 3.1777E4        | 2        | 2                   | 42    | 54  | Carbamidomethylation; Oxidation (M)                  | C6:Carbamidomethylation:1000.00;M11:Oxidation (M):1000.00                                                                 | PEAKS DB  |
| R.IMGEQEQYDSYDIRSTR.S                                    | Y    | 40.39  | 2089.9375 | 17     | 1.4  | 697.6541  | 3 | 30.22 | 4        | F4:1428 | OB5931 H6 raw.raw | 2.3182E4        | 1        | 1                   | 55    | 71  |                                                      |                                                                                                                           | PEAKS DB  |
| R.C(+57.02)M(+15.99)C(+57.02)EALQQIMENQC(+57.02)DRLQDR.Q | Y    | 38.06  | 2613.0862 | 20     | -1.3 | 872.0349  | 3 | 33.74 | 4        | F4:1642 | OB5931 H6 raw.raw | 2.8827E5        | 2        | 2                   | 92    | 111 | Carbamidomethylation; Oxidation (M)                  | C1:Carbamidomethylation:1000.00;M2:Oxidation (M):55.71;C3:Carbamidomethylation:1000.00;C14:Carbamidomethylation:1000.00   | PEAKS DB  |
| R.QVDRVNLKPC(+57.02)EQHIMQR.I                            | Y    | 36.67  | 2150.0837 | 17     | -0.7 | 538.5278  | 4 | 33.49 | 3        | F3:1625 | OB5930 H6 raw.raw | 2.7618E4        | 1        | 1                   | 38    | 54  | Carbamidomethylation                                 | C10:Carbamidomethylation:1000.00                                                                                          | PEAKS DB  |
| R.ELM(+15.99)NLPQQC(+57.02)NFR(+14.02).A                 | Y    | 35.50  | 1578.7283 | 12     | 0.4  | 790.3717  | 2 | 29.78 | 4        | F4:1404 | OB5931 H6 raw.raw | 8.1416E3        | 1        | 1                   | 120   | 131 | Oxidation (M); Carbamidomethylation; Methylation(KR) | M3:Oxidation (M):1000.00;C9:Carbamidomethylation:1000.00;R12:Methylation(KR):1000.00                                      | PEAKS PTM |
| R.C(+57.02)MC(+57.02)EALQ(+.98)QIMENQC(+57.02)DRLQDR.Q   | Y    | 34.07  | 2598.0754 | 20     | 2.7  | 867.0348  | 3 | 39.74 | 3        | F3:1998 | OB5930 H6 raw.raw | 0               | 0        | 0                   | 92    | 111 | Carbamidomethylation                                 | C1:Carbamidomethylation:1000.00;C3:Carbamidomethylation:1000.00;Q7:Deamidation (NQ):0.00;C14:Carbamidomethylation:1000.00 | PEAKS DB  |
| R.IMGE(+21.98)QEYDSYDIR.S                                | Y    | 33.97  | 1767.7385 | 14     | 0.1  | 884.8766  | 2 | 30.72 | 4        | F4:1472 | OB5931 H6 raw.raw | 1.8041E4        | 1        | 1                   | 55    | 68  |                                                      | E4:Sodium adduct:17.01                                                                                                    | PEAKS PTM |
| R.IMGEQEQYD(-18.01)SYDIR.S                               | Y    | 33.03  | 1727.7461 | 14     | -0.1 | 864.8802  | 2 | 31.20 | 4        | F4:1499 | OB5931 H6 raw.raw | 0               | 0        | 0                   | 55    | 68  |                                                      | D9:Dehydration:8.69                                                                                                       | PEAKS PTM |
| total 30 peptides                                        |      |        |           |        |      |           |   |       |          |         |                   |                 |          |                     |       |     |                                                      |                                                                                                                           |           |

| [Protein Coverage](#) | [Supporting Peptides](#) |

Protein Coverage:

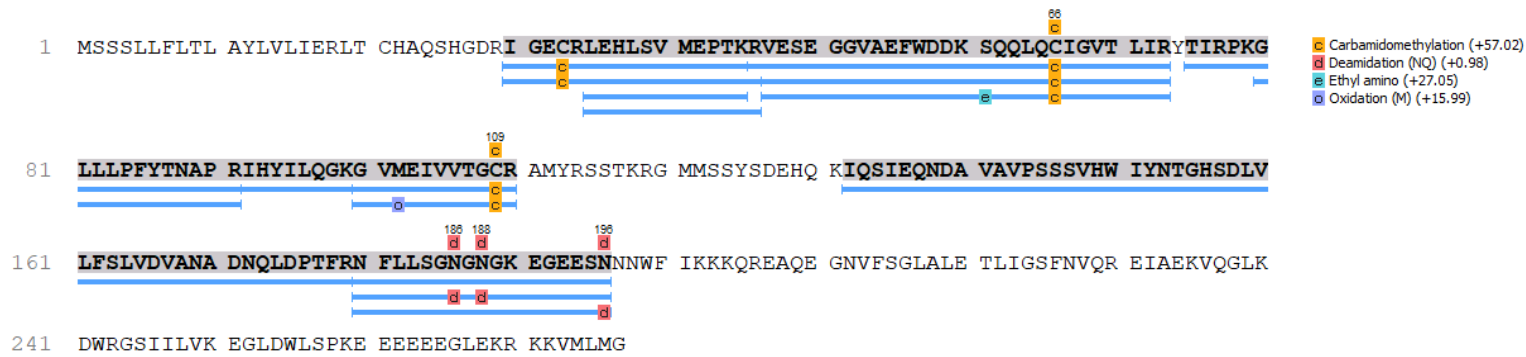

## Supporting Peptides:

| Peptide                                        | Uniq | -10lgP | Mass      | Length | ppm  | m/z       | z | RT    | Fraction | Scan    | Source File       | Area Raw in gel | #Feature | #Feature Raw in gel | Start | End | PTM                                 | AScore                                                    | Found By  |
|------------------------------------------------|------|--------|-----------|--------|------|-----------|---|-------|----------|---------|-------------------|-----------------|----------|---------------------|-------|-----|-------------------------------------|-----------------------------------------------------------|-----------|
| R.VESEGVAEFWDDKSQQLQC(+57.02)IGVTLIR.Y         | Y    | 118.02 | 3063.4971 | 27     | 4.1  | 1022.1771 | 3 | 36.71 | 5        | F5:1824 | OB5932 H2 raw.raw | 9.8845E6        | 5        | 5                   | 47    | 73  | Carbamidomethylation                | C20:Carbamidomethylation:1000.00                          | PEAKS DB  |
| K.GLLLPFYTNAPR.I                               | Y    | 103.14 | 1360.7502 | 12     | 3.3  | 681.3846  | 2 | 35.60 | 5        | F5:1749 | OB5932 H2 raw.raw | 3.6865E6        | 3        | 3                   | 80    | 91  |                                     |                                                           | PEAKS DB  |
| K.GVMEIVVTGC(+57.02)R.A                        | Y    | 101.50 | 1219.6053 | 11     | 1.7  | 610.8110  | 2 | 31.32 | 5        | F5:1506 | OB5932 H2 raw.raw | 9.381E5         | 3        | 3                   | 100   | 110 | Carbamidomethylation                | C10:Carbamidomethylation:1000.00                          | PEAKS DB  |
| K.RVESEGVAEFWDDKSQQLQC(+57.02)IGVTLIR.Y        | Y    | 93.84  | 3219.5981 | 28     | 2.3  | 1074.2091 | 3 | 35.76 | 6        | F6:1794 | OB5933 H2 raw.raw | 2.9779E6        | 4        | 4                   | 46    | 73  | Carbamidomethylation                | C21:Carbamidomethylation:1000.00                          | PEAKS DB  |
| K.GVM(+15.99)EIVVTGC(+57.02)R.A                | Y    | 80.01  | 1235.6002 | 11     | 2.0  | 618.8086  | 2 | 28.16 | 5        | F5:1326 | OB5932 H2 raw.raw | 5.5468E3        | 1        | 1                   | 100   | 110 | Oxidation (M); Carbamidomethylation | M3:Oxidation (M):1000.00;C10:Carbamidomethylation:1000.00 | PEAKS DB  |
| R.NFLLSGN(+.98)GN(+.98)GKEGEESN.N              | Y    | 75.03  | 1766.7594 | 17     | 0.2  | 884.3871  | 2 | 30.77 | 5        | F5:1501 | OB5932 H2 raw.raw | 8.8395E4        | 1        | 1                   | 180   | 196 | Deamidation (NQ)                    | N7:Deamidation (NQ):96.06;N9:Deamidation (NQ):72.89       | PEAKS DB  |
| R.IHYILQKGK.G                                  | Y    | 74.99  | 970.5600  | 8      | 0.7  | 486.2876  | 2 | 27.62 | 5        | F5:1288 | OB5932 H2 raw.raw | 3.1727E4        | 2        | 2                   | 92    | 99  |                                     |                                                           | PEAKS DB  |
| R.LEHLSVMEPTK.R                                | Y    | 72.49  | 1282.6591 | 11     | -0.9 | 642.3362  | 2 | 27.79 | 6        | F6:1323 | OB5933 H2 raw.raw | 1.5006E4        | 2        | 2                   | 35    | 45  |                                     |                                                           | PEAKS DB  |
| R.NFLLSGN(+.98)GKEGEESN.N                      | Y    | 69.37  | 1765.7754 | 17     | -0.1 | 883.8949  | 2 | 29.97 | 1        | F1:1326 | OB5921 H2 raw.raw | 8.6902E4        | 2        | 2                   | 180   | 196 |                                     | N9:Deamidation (NQ):39.76                                 | PEAKS DB  |
| R.IGEC(+57.02)RLEHLSVMEPTKR.V                  | Y    | 63.30  | 2054.0400 | 17     | -1.6 | 514.5165  | 4 | 30.02 | 5        | F5:1433 | OB5932 H2 raw.raw | 7.9524E4        | 3        | 3                   | 30    | 46  | Carbamidomethylation                | C4:Carbamidomethylation:1000.00                           | PEAKS DB  |
| R.IGEC(+57.02)RLEHLSVMEPTK.R                   | Y    | 61.10  | 1897.9390 | 16     | 0.1  | 633.6537  | 3 | 30.21 | 5        | F5:1441 | OB5932 H2 raw.raw | 3.3681E5        | 3        | 3                   | 30    | 45  | Carbamidomethylation                | C4:Carbamidomethylation:1000.00                           | PEAKS DB  |
| R.NFLLSGN(+.98)GNGKEGEESN(+.98).N              | Y    | 59.86  | 1766.7594 | 17     | 0.2  | 884.3871  | 2 | 30.77 | 5        | F5:1462 | OB5932 H2 raw.raw | 1.261E5         | 2        | 2                   | 180   | 196 |                                     | N7:Deamidation (NQ):39.76;N17:Deamidation (NQ):47.16      | PEAKS DB  |
| R.LEHLSVMEPTKR.V                               | Y    | 58.37  | 1438.7603 | 12     | 0.4  | 720.3877  | 2 | 28.17 | 6        | F6:1338 | OB5933 H2 raw.raw | 4.4747E3        | 1        | 1                   | 35    | 46  |                                     |                                                           | PEAKS DB  |
| R.NFLLSGNGNGKEGEESN(+.98).N                    | Y    | 57.94  | 1765.7754 | 17     | -0.1 | 883.8949  | 2 | 29.97 | 1        | F1:1310 | OB5921 H2 raw.raw | 9.4247E4        | 2        | 2                   | 180   | 196 |                                     | N17:Deamidation (NQ):23.01                                | PEAKS DB  |
| R.VESEGVAEFWDDKS(+27.05)QQLQC(+57.02)IGVTLIR.Y | Y    | 54.31  | 3090.5444 | 27     | -9.7 | 1031.1787 | 3 | 35.92 | 1        | F1:1673 | OB5921 H2 raw.raw | 1.3332E5        | 1        | 1                   | 47    | 73  | Ethyl amino; Carbamidomethylation   | S15:Ethyl amino:19.64;C20:Carbamidomethylation:1000.00    | PEAKS PTM |
| total 19 peptides                              |      |        |           |        |      |           |   |       |          |         |                   |                 |          |                     |       |     |                                     |                                                           |           |

| Peptide                                               | Uniq | -10lgP | Mass      | Length | ppm  | m/z       | z | RT    | Fraction | Scan    | Source File       | Area Raw in gel | #Feature | #Feature Raw in gel | Start | End | PTM              | AScore                                               | Found By  |
|-------------------------------------------------------|------|--------|-----------|--------|------|-----------|---|-------|----------|---------|-------------------|-----------------|----------|---------------------|-------|-----|------------------|------------------------------------------------------|-----------|
| R.NFLLSGNGN(+.98)GKEGEESN(+.98).N                     | Y    | 49.86  | 1766.7594 | 17     | 0.4  | 884.3873  | 2 | 30.59 | 6        | F6:1477 | OB5933 H2 raw.raw | 8.6083E4        | 1        | 1                   | 180   | 196 | Deamidation (NQ) | N9:Deamidation (NQ):30.36;N17:Deamidation (NQ):65.92 | PEAKS DB  |
| Y.TIRPK(+149.03)GLLLPFYTNAPR.I                        | Y    | 47.37  | 2105.1606 | 17     | -7.5 | 702.7222  | 3 | 34.98 | 1        | F1:1620 | OB5921 H2 raw.raw | 1.195E5         | 1        | 1                   | 75    | 91  |                  | K5:Benzyl isothiocyanate:4.73                        | PEAKS PTM |
| K.IQSIEQNDAVAVPSSSVHWIYNTGHSIDLVLFSLVDVANADNQLDPTFR.N | Y    | 45.19  | 5281.5957 | 48     | 1.5  | 1321.4082 | 4 | 38.94 | 5        | F5:1947 | OB5932 H2 raw.raw | 2.1676E6        | 2        | 2                   | 132   | 179 |                  |                                                      | PEAKS DB  |
| Y.T(+149.03)IRPKGLLLPFYTNAPR.I                        | Y    | 42.83  | 2105.1606 | 17     | -7.1 | 702.7225  | 3 | 34.97 | 5        | F5:1719 | OB5932 H2 raw.raw | 0               | 0        | 0                   | 75    | 91  |                  | T1:Benzyl isothiocyanate:5.74                        | PEAKS PTM |
| total 19 peptides                                     |      |        |           |        |      |           |   |       |          |         |                   |                 |          |                     |       |     |                  |                                                      |           |

A0A0A6ZDT0|A0A0A6ZDT0\_ARAHY

back to list

| Protein Coverage | Supporting Peptides |

Protein Coverage:

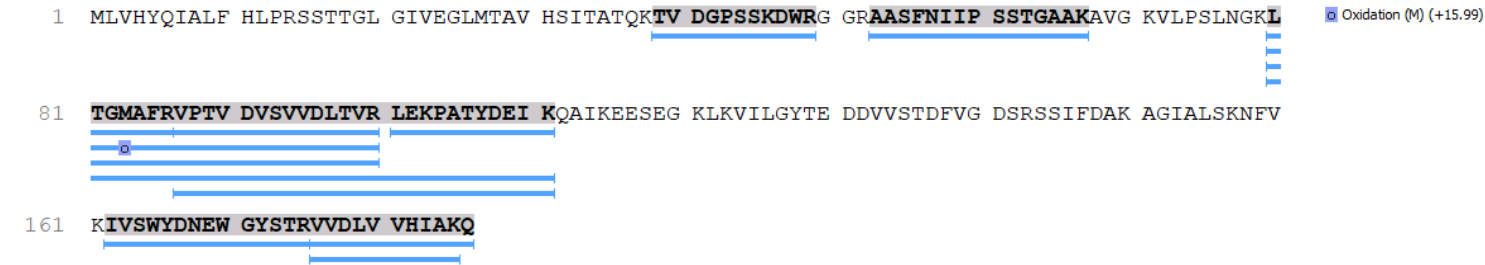

Supporting Peptides:

| Peptide                              | Uniq | -10lgP | Mass      | Length | ppm  | m/z       | z | RT    | Fraction | Scan     | Source File        | Area Raw in gel | #Feature | #Feature Raw in gel | Start | End | PTM           | AScore                   | Found By |
|--------------------------------------|------|--------|-----------|--------|------|-----------|---|-------|----------|----------|--------------------|-----------------|----------|---------------------|-------|-----|---------------|--------------------------|----------|
| K.IVSWYDNEWGYSTR.V                   | N    | 119.02 | 1774.7950 | 14     | 1.6  | 888.4062  | 2 | 33.83 | 11       | F11:1692 | OB5938 H3A raw.raw | 2.0685E6        | 3        | 3                   | 162   | 175 |               |                          | PEAKS DB |
| R.VPTVDVSVVDLTVR.L                   | N    | 109.01 | 1497.8402 | 14     | 0.8  | 749.9280  | 2 | 34.01 | 11       | F11:1703 | OB5938 H3A raw.raw | 2.6396E6        | 3        | 3                   | 87    | 100 |               |                          | PEAKS DB |
| R.VVDLVVHIAKQ                        | Y    | 88.97  | 1219.7289 | 11     | 0.6  | 610.8721  | 2 | 29.33 | 11       | F11:1412 | OB5938 H3A raw.raw | 1.0958E6        | 6        | 6                   | 176   | 186 |               |                          | PEAKS DB |
| R.AASFNIIPSSTGAAK.A                  | N    | 84.99  | 1433.7513 | 15     | 2.0  | 717.8844  | 2 | 31.01 | 10       | F10:1503 | OB5937 H3A raw.raw | 5.133E6         | 5        | 5                   | 53    | 67  |               |                          | PEAKS DB |
| K.LTGMAFRVPTVDVSVVDLTVR.L            | N    | 83.77  | 2274.2405 | 21     | -2.6 | 1138.1245 | 2 | 36.04 | 10       | F10:1813 | OB5937 H3A raw.raw | 1.7435E6        | 4        | 4                   | 80    | 100 |               |                          | PEAKS DB |
| K.LTGM(+15.99)AFRVPTVDVSVVDLTVR.L    | N    | 80.37  | 2290.2354 | 21     | -5.6 | 764.4148  | 3 | 36.83 | 9        | F9:1833  | OB5936 H3A raw.raw | 1.375E6         | 4        | 4                   | 80    | 100 | Oxidation (M) | M4:Oxidation (M):1000.00 | PEAKS DB |
| R.LEKPATYDEIK.Q                      | N    | 55.56  | 1305.6816 | 11     | -1.7 | 653.8470  | 2 | 26.49 | 10       | F10:1243 | OB5937 H3A raw.raw | 0               | 0        | 0                   | 101   | 111 |               |                          | PEAKS DB |
| R.VPTVDVSVVDLTVRLEKPATYDEIK.Q        | N    | 54.73  | 2785.5112 | 25     | 2.7  | 929.5135  | 3 | 34.75 | 11       | F11:1737 | OB5938 H3A raw.raw | 2.5869E6        | 3        | 3                   | 87    | 111 |               |                          | PEAKS DB |
| R.VVDLVVHIAK.Q                       | Y    | 49.58  | 1091.6703 | 10     | 0.4  | 546.8427  | 2 | 29.14 | 11       | F11:1409 | OB5938 H3A raw.raw | 1.7498E4        | 2        | 2                   | 176   | 185 |               |                          | PEAKS DB |
| K.LTGMAFRVPTVDVSVVDLTVRLEKPATYDEIK.Q | N    | 47.61  | 3561.9116 | 32     | 1.9  | 891.4869  | 4 | 36.22 | 11       | F11:1821 | OB5938 H3A raw.raw | 1.7224E6        | 2        | 2                   | 80    | 111 |               |                          | PEAKS DB |
| K.TVDGPSSKDW.R.G                     | N    | 43.43  | 1246.5942 | 11     | -1.7 | 624.3033  | 2 | 26.08 | 10       | F10:1212 | OB5937 H3A raw.raw | 1.1675E4        | 2        | 2                   | 39    | 49  |               |                          | PEAKS DB |
| K.LTGMAFR.V                          | N    | 35.18  | 794.4109  | 7      | 1.0  | 398.2131  | 2 | 30.69 | 9        | F9:1449  | OB5936 H3A raw.raw | 9.0748E3        | 1        | 1                   | 80    | 86  |               |                          | PEAKS DB |
| total 12 peptides                    |      |        |           |        |      |           |   |       |          |          |                    |                 |          |                     |       |     |               |                          |          |

E9LFE9|E9LFE9\_ARAHY

back to list

| Protein Coverage | Supporting Peptides |

Protein Coverage:

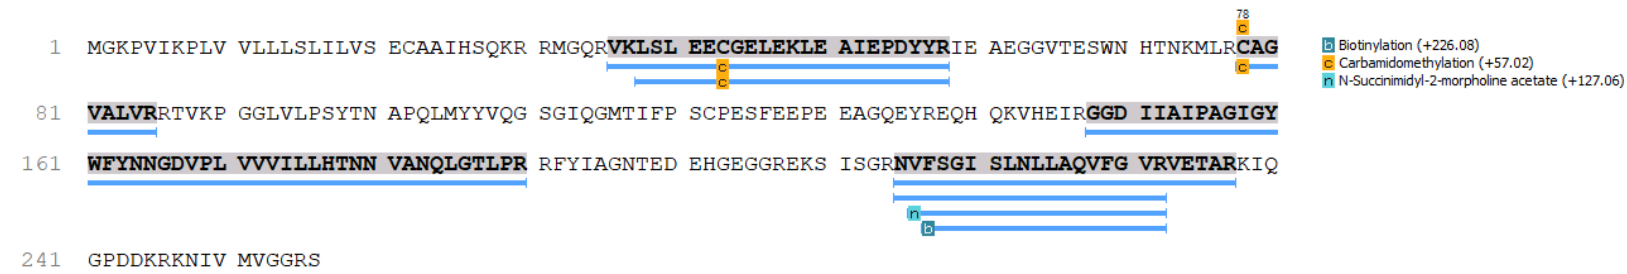

Supporting Peptides:

| Peptide                                         | Uniq | -10lgP | Mass      | Length | ppm  | m/z       | z | RT    | Fraction | Scan    | Source File        | Area Raw in gel | #Feature | #Feature Raw in gel | Start | End | PTM                                        | AScore                                         | Found By  |
|-------------------------------------------------|------|--------|-----------|--------|------|-----------|---|-------|----------|---------|--------------------|-----------------|----------|---------------------|-------|-----|--------------------------------------------|------------------------------------------------|-----------|
| R.NVFSGISLNLLAQVFGVR.V                          | Y    | 112.21 | 1933.0785 | 18     | 2.8  | 967.5492  | 2 | 43.21 | 7        | F7:2172 | OB5934 H3B raw.raw | 1.5453E6        | 5        | 5                   | 215   | 232 |                                            |                                                | PEAKS DB  |
| K.LSLEEC(+57.02)GELEKLEAIEPDYYR.I               | Y    | 109.05 | 2555.2100 | 21     | 1.7  | 852.7454  | 3 | 34.79 | 7        | F7:1692 | OB5934 H3B raw.raw | 1.2508E6        | 4        | 4                   | 38    | 58  | Carbamidomethylation                       | C6:Carbamidomethylation:1000.00                | PEAKS DB  |
| R.VKLSLEEC(+57.02)GELEKLEAIEPDYYR.I             | Y    | 98.79  | 2782.3735 | 23     | 1.8  | 928.4668  | 3 | 34.24 | 7        | F7:1649 | OB5934 H3B raw.raw | 7.0271E5        | 2        | 2                   | 36    | 58  | Carbamidomethylation                       | C8:Carbamidomethylation:1000.00                | PEAKS DB  |
| R.NVFSGISLNLLAQVFGVRVETAR.K                     | Y    | 80.79  | 2489.3755 | 23     | 3.0  | 830.8016  | 3 | 42.69 | 2        | F2:1993 | OB5925 H3B raw.raw | 4.1048E6        | 4        | 4                   | 215   | 237 |                                            |                                                | PEAKS DB  |
| R.C(+57.02)AGVALVR.R                            | Y    | 69.07  | 844.4589  | 8      | 1.7  | 423.2374  | 2 | 26.94 | 2        | F2:1100 | OB5925 H3B raw.raw | 1.0611E3        | 1        | 1                   | 78    | 85  | Carbamidomethylation                       | C1:Carbamidomethylation:1000.00                | PEAKS DB  |
| N.V(+127.06)FSGISLNLLAQVFGVR.V                  | Y    | 53.35  | 1946.0989 | 17     | -8.7 | 974.0482  | 2 | 41.55 | 2        | F2:1934 | OB5925 H3B raw.raw | 1.8552E7        | 3        | 3                   | 216   | 232 | N-Succinimidyl-2-morpholine acetate        | V1:N-Succinimidyl-2-morpholine acetate:1000.00 | PEAKS PTM |
| R.GGDIIAIPAGIGYWFYNNGDVPLVVVILLHTNNVANQLGTLPR.R | Y    | 46.38  | 4573.4482 | 43     | 3.5  | 1525.4954 | 3 | 44.60 | 2        | F2:2114 | OB5925 H3B raw.raw | 9.2311E5        | 3        | 3                   | 148   | 190 |                                            |                                                | PEAKS DB  |
| R.NVFSGIS(+13.03)LNLLAQVFGVR.V                  | Y    | 44.51  | 1946.1101 | 18     | -9.4 | 974.0532  | 2 | 47.20 | 7        | F7:2410 | OB5934 H3B raw.raw | 0               | 0        | 0                   | 215   | 232 | S7:Michael addition with methylamine:16.65 |                                                | PEAKS PTM |
| R.NVFSGIS(+14.02)LNLLAQVFGVR.V                  | Y    | 40.55  | 1947.0941 | 18     | 2.0  | 974.5563  | 2 | 47.47 | 2        | F2:2277 | OB5925 H3B raw.raw | 0               | 0        | 0                   | 215   | 232 | S7:Methylation(thers):15.62                |                                                | PEAKS PTM |
| V.F(+226.08)SGISLNLLAQVFGVR.V                   | Y    | 32.77  | 1946.0447 | 16     | 2.4  | 974.0319  | 2 | 50.95 | 2        | F2:2479 | OB5925 H3B raw.raw | 0               | 0        | 0                   | 217   | 232 | Biotinylation                              | F1:Biotinylation:1000.00                       | PEAKS PTM |
| total 10 peptides                               |      |        |           |        |      |           |   |       |          |         |                    |                 |          |                     |       |     |                                            |                                                |           |

Protein Coverage:

1 MVIGPFRLSL CVCLVFLTSA CFGTRLEESF NECQLDRLNA LTPDNRIESQ GGITETWNSN HPFLRCAGVT LLKRTIFPNG

81 FHLPSYANYP QLIFIAQGNG VFGVSLPGCP VTYEEAESQS REDRRQRIVI KRESEQEQQ QGDSHHKIYH FRQGHLLAIP

161 AGVPYWSFNY GNEPIVAITL LDTSNLDNQL DPSPRRFYLA GNPEEEHPET QQQQPQTRRR HGQHQQDEYG SQGEEEGNNV

241 LSGFSTQLLA HAFGVDEEIA RILQNPPEQT KDQIVRVEGG FRDVISPRWG EGKQYEDELE ERQRQPPRRD EQGKGYYDYY

321 DRRPRHRQDP YREGDEDDRR PRGSRQGQGR GYDDDDRRPG QYEEGEEDDR RPRSSSRPKR QGRRHDDDDR RADEDDRRGY

401 DDDERRPDED DRRGYDDDER RPDDDDRQGY DDDDRRPRWS SRPKGQGRNG VEETLCSPTL VEDIARPSRA DFYNPAAGRI

481 SSANSLTFFPI LRWFQLSAEH VLLYRNGIYS PHWNNNANSI IYGLRGEGR I QVNSQGNV FNGVLREGQI LLVPQNFVAVG

561 KQAGNEGFY VAFKTADRAS PATSSKCLGE SPLMFSSMLL AFEIIKSVLS NTMETRPLWS LLMIPSMGLN VVINLNHNNN

641 AQVDSKNNDG SRLWWPSSII IK

Diethylation (+56.06)

Supporting Peptides:

| Peptide                      | Uniq | -10lgP | Mass      | Length | ppm | m/z      | z | RT    | Fraction | Scan    | Source File       | Area Raw in gel | #Feature | #Feature Raw in gel | Start | End | PTM          | AScore                    | Found By  |
|------------------------------|------|--------|-----------|--------|-----|----------|---|-------|----------|---------|-------------------|-----------------|----------|---------------------|-------|-----|--------------|---------------------------|-----------|
| R.IQVVNSQGNVFNGLR.E          | Y    | 125.58 | 1813.9799 | 17     | 2.0 | 907.9990 | 2 | 32.81 | 5        | F5:1595 | OB5932 H2 raw.raw | 4.7427E5        | 2        | 2                   | 530   | 546 |              |                           | PEAKS DB  |
| R.WFQLSAEHVLLYR.N            | Y    | 96.74  | 1660.8726 | 13     | 0.1 | 831.4436 | 2 | 34.98 | 1        | F1:1614 | OB5921 H2 raw.raw | 2.1298E5        | 2        | 2                   | 493   | 505 |              |                           | PEAKS DB  |
| R.ADFYNPAAGR.I               | Y    | 81.48  | 1080.4988 | 10     | 1.0 | 541.2572 | 2 | 28.15 | 1        | F1:1213 | OB5921 H2 raw.raw | 4.2854E3        | 1        | 1                   | 470   | 479 |              |                           | PEAKS DB  |
| R.ISSANSLTFFPIR.W            | Y    | 79.81  | 1417.7928 | 13     | 1.5 | 709.9048 | 2 | 34.24 | 1        | F1:1575 | OB5921 H2 raw.raw | 6.7566E5        | 3        | 3                   | 480   | 492 |              |                           | PEAKS DB  |
| R.IQVVNSQGN(+.98)AVFNGVLR.E  | Y    | 73.39  | 1814.9639 | 17     | 0.5 | 908.4896 | 2 | 33.38 | 5        | F5:1634 | OB5932 H2 raw.raw | 1.7282E4        | 1        | 1                   | 530   | 546 |              | N9:Deamidation (NQ):26.38 | PEAKS DB  |
| R.EGQILLVPQNFVAVGK.Q         | Y    | 64.50  | 1611.8984 | 15     | 2.3 | 806.9584 | 2 | 34.31 | 5        | F5:1701 | OB5932 H2 raw.raw | 5.2907E5        | 3        | 3                   | 547   | 561 |              |                           | PEAKS DB  |
| R.EGQILLVPQNFVAVGK(+56.06).Q | Y    | 36.48  | 1667.9609 | 15     | 2.1 | 834.9895 | 2 | 34.69 | 5        | F5:1704 | OB5932 H2 raw.raw | 2.7965E6        | 2        | 2                   | 547   | 561 | Diethylation | K15:Diethylation:121.27   | PEAKS PTM |
| total 7 peptides             |      |        |           |        |     |          |   |       |          |         |                   |                 |          |                     |       |     |              |                           |           |

A0A0F7GF62|A0A0F7GF62\_ARAHY

back to list

| Protein Coverage | Supporting Peptides |

Protein Coverage:

1 MATLIAPSNH SSAEDAEALQ KAFKGWGADD KTIIAILGHR NVHQRQQIRK AYEELHQEDL IKRLESEISG DFERAMYRWM

81 LEPADRDAVL ANVAIRNGKK DLHVIAEIAE VLSAEELLAV RRAYRHRYKR SLEEDVAANT TGHRLQLLVG LVSSYRYEGD

161 EINARLAQSE ANILHETVKE KKGNYEEAIR ILTTRSKTQL VATFNRYRDE HAISISKLL DNQASDDFYK ALHTAIRCIN

241 DHKKYYEKVL RNAIKKVGTD EDALSRVVVT RAEKDLRDIK ELYYKRNSVH LEDAVAKETS GDYKKFLLTL LGKQD

Acetylation (Protein N-term) (+42.01)

Supporting Peptides:

| Peptide                          | Uniq | -10lgP | Mass      | Length | ppm  | m/z       | z | RT    | Fraction | Scan     | Source File        | Area Raw in gel | #Feature | #Feature Raw in gel | Start | End | PTM                          | AScore                                  | Found By  |
|----------------------------------|------|--------|-----------|--------|------|-----------|---|-------|----------|----------|--------------------|-----------------|----------|---------------------|-------|-----|------------------------------|-----------------------------------------|-----------|
| R.SLEEDVAANTTGHRLR.Q             | Y    | 108.66 | 1611.7853 | 15     | 0.6  | 806.9004  | 2 | 29.32 | 10       | F10:1409 | OB5937 H3A raw.raw | 2.1959E5        | 3        | 3                   | 131   | 145 |                              |                                         | PEAKS DB  |
| M.A(+42.01)TLIAPSNHSSAEDAEALQK.A | Y    | 96.71  | 2094.0229 | 20     | 1.7  | 1048.0205 | 2 | 30.83 | 10       | F10:1507 | OB5937 H3A raw.raw | 1.9399E5        | 3        | 3                   | 2     | 21  | Acetylation (Protein N-term) | A1:Acetylation (Protein N-term):1000.00 | PEAKS PTM |
| R.SKTQLVATFNR.Y                  | Y    | 81.35  | 1263.6935 | 11     | 0.6  | 632.8544  | 2 | 27.65 | 10       | F10:1310 | OB5937 H3A raw.raw | 1.9511E3        | 1        | 1                   | 196   | 206 |                              |                                         | PEAKS DB  |
| K.FLLTLGKQD                      | Y    | 73.91  | 1146.6648 | 10     | 0.9  | 574.3402  | 2 | 35.29 | 11       | F11:1769 | OB5938 H3A raw.raw | 1.1511E6        | 2        | 2                   | 306   | 315 |                              |                                         | PEAKS DB  |
| K.AFKGWGADDKTIIAILGHR.N          | Y    | 54.66  | 2068.1218 | 19     | -0.4 | 518.0375  | 4 | 33.81 | 11       | F11:1685 | OB5938 H3A raw.raw | 0               | 0        | 0                   | 22    | 40  |                              |                                         | PEAKS DB  |
| K.LLDNQASDDFYK.A                 | Y    | 41.68  | 1427.6569 | 12     | 0.8  | 714.8362  | 2 | 30.00 | 10       | F10:1465 | OB5937 H3A raw.raw | 2.1343E4        | 2        | 2                   | 219   | 230 |                              |                                         | PEAKS DB  |
| total 6 peptides                 |      |        |           |        |      |           |   |       |          |          |                    |                 |          |                     |       |     |                              |                                         |           |

BOYIU5|BOYIU5\_ARAHY

back to list

| [Protein Coverage](#) | [Supporting Peptides](#) |

Protein Coverage:

1

MGVHTFEEES TSPVPPAK<sup>47</sup>LF KATVVDGDEL TPKLIPAIQS IEIVEGN<sup>d</sup>GGP GTVK<sup>d</sup>KVTAVE DGKTSYVLHK IDAIDEATYT

Deamidation (NQ) (+0.98)

81

YDYTISGGTG FQEILEKVSF KTKLEAADGG SKIKVSVTFH TKGDAPLPDE VHQDVKQKSQ GIFKAIEGYV LSN

Supporting Peptides:

| Peptide                                      | Uniq | -10lgP | Mass      | Length | ppm | m/z       | z | RT    | Fraction | Scan    | Source File       | Area Raw in gel | #Feature | #Feature Raw in gel | Start | End | PTM              | AScore                      | Found By |
|----------------------------------------------|------|--------|-----------|--------|-----|-----------|---|-------|----------|---------|-------------------|-----------------|----------|---------------------|-------|-----|------------------|-----------------------------|----------|
| K.IDAIDEATYTYDTISGGTG <sup>d</sup> FQEILEK.V | Y    | 110.28 | 3012.4126 | 27     | 4.4 | 1507.2202 | 2 | 38.52 | 3        | F3:1926 | OB5930 H6 raw.raw | 5.5055E4        | 1        | 1                   | 71    | 97  |                  |                             | PEAKS DB |
| K.LIPAIQSIEIVEGN <sup>d</sup> GGPGTVK.K      | Y    | 93.63  | 2091.1575 | 21     | 2.0 | 1046.5881 | 2 | 35.72 | 4        | F4:1774 | OB5931 H6 raw.raw | 1.5174E5        | 2        | 2                   | 34    | 54  |                  |                             | PEAKS DB |
| K.LIPAIQSIEIVEGN(+.98)GGPGTVK.K              | Y    | 83.95  | 2092.1416 | 21     | 3.9 | 1047.0822 | 2 | 36.03 | 4        | F4:1784 | OB5931 H6 raw.raw | 5.1573E4        | 1        | 1                   | 34    | 54  | Deamidation (NQ) | N14:Deamidation (NQ):166.48 | PEAKS DB |
| K.GDAPLPDE <sup>d</sup> VHQDVK.Q             | Y    | 60.93  | 1518.7314 | 14     | 3.9 | 760.3760  | 2 | 27.69 | 4        | F4:1283 | OB5931 H6 raw.raw | 3.0914E3        | 2        | 2                   | 123   | 136 |                  |                             | PEAKS DB |
| K.ATVVDGDELTPK.L                             | Y    | 59.97  | 1243.6295 | 12     | 1.0 | 622.8226  | 2 | 28.00 | 4        | F4:1307 | OB5931 H6 raw.raw | 5.1387E3        | 1        | 1                   | 22    | 33  |                  |                             | PEAKS DB |
| M.GVHTFEEESTSPVPPAK.L                        | Y    | 54.06  | 1810.8737 | 17     | 0.6 | 906.4446  | 2 | 28.77 | 4        | F4:1359 | OB5931 H6 raw.raw | 4.7221E3        | 2        | 2                   | 2     | 18  |                  |                             | PEAKS DB |
| total 6 peptides                             |      |        |           |        |     |           |   |       |          |         |                   |                 |          |                     |       |     |                  |                             |          |

Q2PK12|Q2PK12\_ARAHY

back to list

| [Protein Coverage](#) | [Supporting Peptides](#) |

Protein Coverage:

1

MANAASGM<sup>d</sup>AV HDDCKLR<sup>d</sup>FLE LKAKRTHR<sup>d</sup>FI VFKIEEN<sup>d</sup>QK<sup>d</sup>Q VIVEK<sup>d</sup>LGEPA QGYEDFTAC<sup>d</sup>L PPNECRYAVY DFEYLTEGNV

Carbamidomethylation (+57.02)

81

PKSR<sup>d</sup>IFFIAW SPDTSR<sup>d</sup>VRNK MIYASSKDRF KREL<sup>d</sup>DGIQVE LQATDPTEMD LDVFK<sup>d</sup>SRAN

Supporting Peptides:

| Peptide                                   | Uniq | -10lgP | Mass      | Length | ppm  | m/z       | z | RT    | Fraction | Scan    | Source File       | Area Raw in gel | #Feature | #Feature Raw in gel | Start | End | PTM                  | AScore                                                            | Found By |
|-------------------------------------------|------|--------|-----------|--------|------|-----------|---|-------|----------|---------|-------------------|-----------------|----------|---------------------|-------|-----|----------------------|-------------------------------------------------------------------|----------|
| R.YAVYDFEYLTEGNVPK.S                      | Y    | 108.28 | 1906.8988 | 16     | 3.0  | 954.4595  | 2 | 35.51 | 3        | F3:1754 | OB5930 H6 raw.raw | 3.2417E4        | 2        | 2                   | 67    | 82  |                      |                                                                   | PEAKS DB |
| R.IFFIAWSPDTSR.V                          | Y    | 85.65  | 1438.7245 | 12     | 2.2  | 720.3711  | 2 | 37.18 | 4        | F4:1851 | OB5931 H6 raw.raw | 5.3939E4        | 2        | 2                   | 85    | 96  |                      |                                                                   | PEAKS DB |
| R.FIVFKIEENQK.Q                           | Y    | 67.92  | 1393.7605 | 11     | 2.4  | 697.8892  | 2 | 34.12 | 4        | F4:1671 | OB5931 H6 raw.raw | 8.0867E3        | 2        | 2                   | 29    | 39  |                      |                                                                   | PEAKS DB |
| K.LGEPAQGYEDFTAC(+57.02)LPPNEC(+57.02)R.Y | Y    | 50.89  | 2423.0522 | 21     | -2.6 | 1212.5303 | 2 | 33.24 | 3        | F3:1619 | OB5930 H6 raw.raw | 0               | 0        | 0                   | 46    | 66  | Carbamidomethylation | C14:Carbamidomethylation:1000.00;C20:Carbamidomethylation:1000.00 | PEAKS DB |
| R.ELDGIQVELQATDPTEMDLDVFK.S               | Y    | 49.35  | 2605.2468 | 23     | -1.1 | 1303.6293 | 2 | 38.15 | 4        | F4:1905 | OB5931 H6 raw.raw | 0               | 0        | 0                   | 113   | 135 |                      |                                                                   | PEAKS DB |
| total 5 peptides                          |      |        |           |        |      |           |   |       |          |         |                   |                 |          |                     |       |     |                      |                                                                   |          |

H6U596|H6U596\_ARAHY

back to list

| [Protein Coverage](#) | [Supporting Peptides](#) |

Protein Coverage:

1 SPLFPRIFGH EAGGIVESVG EGVTHLKPGD HALPVFTGEC GECPHCKSEE SNMCDLLR**IN TDRGVM****HDQ ESRFSIK**GKP

81 IYHFVGTSTF SEYTVVHAGC VAKINPEAPL DKVCVLSCGI CTGLGATINV AKPK**PGSSVA VFGLGAVGLA AAEGAR**ISGA

161 SR**IIGVDLVS SRFELAK**KFG VNEFV

Supporting Peptides:

| Peptide                     | Uniq | -10lgP | Mass      | Length | ppm  | m/z      | z | RT    | Fraction | Scan     | Source File        | Area Raw in gel | #Feature | #Feature Raw in gel | Start | End | PTM                                             | AScore | Found By  |
|-----------------------------|------|--------|-----------|--------|------|----------|---|-------|----------|----------|--------------------|-----------------|----------|---------------------|-------|-----|-------------------------------------------------|--------|-----------|
| R.IIGVDLVSSRFELAK.K         | Y    | 107.11 | 1645.9402 | 15     | 1.1  | 823.9783 | 2 | 33.65 | 11       | F11:1676 | OB5938 H3A raw.raw | 1.8835E7        | 6        | 6                   | 163   | 177 |                                                 |        | PEAKS DB  |
| R.IIGVDLVSSR.F              | Y    | 72.92  | 1057.6132 | 10     | 0.2  | 529.8140 | 2 | 31.58 | 10       | F10:1551 | OB5937 H3A raw.raw | 1.959E5         | 2        | 2                   | 163   | 172 |                                                 |        | PEAKS DB  |
| R.INTDRGVMHDQESRFSIK.G      | Y    | 67.78  | 2245.1272 | 19     | 0.2  | 562.2892 | 4 | 29.32 | 10       | F10:1415 | OB5937 H3A raw.raw | 4.7416E4        | 1        | 1                   | 59    | 77  |                                                 |        | PEAKS DB  |
| K.PGSSVAVFGLGAVGLAAEGAR.I   | Y    | 52.36  | 1956.0428 | 22     | -2.3 | 979.0265 | 2 | 37.95 | 9        | F9:1901  | OB5936 H3A raw.raw | 1.1681E5        | 1        | 1                   | 135   | 156 |                                                 |        | PEAKS DB  |
| R.I(+57.02)IGVDLVSSRFELAK.K | Y    | 50.32  | 1702.9617 | 15     | 0.3  | 852.4884 | 2 | 36.07 | 9        | F9:1782  | OB5936 H3A raw.raw | 0               | 0        | 0                   | 163   | 177 | I1:Carbamidomethylation (DHKE, X@N-term):4 1.53 |        | PEAKS PTM |
| I.GVDLVSSRFELAK.K           | Y    | 38.04  | 1419.7721 | 13     | 0.4  | 710.8936 | 2 | 33.84 | 10       | F10:1685 | OB5937 H3A raw.raw | 3.3254E5        | 2        | 2                   | 165   | 177 |                                                 |        | PEAKS DB  |
| total 6 peptides            |      |        |           |        |      |          |   |       |          |          |                    |                 |          |                     |       |     |                                                 |        |           |

B4UW81|B4UW81\_ARAHYback to list

| Protein Coverage | Supporting Peptides |

Protein Coverage:

1 MASDTKKLKL YSYWRSSCSF RVRIALNLKE FLKLNPGFV PVLLDGDVLV AD**SLAIIMYL DDKYPQHPLL PSDIHKR****AIN** Beta-methylthiolation (ND) (+45.99)

81 **FQATHIVSSS IQPLQNISFL NYIGEKVGPD EKLPWQSVL RK****GFTALEKL LKDHTGR****YAT GDEIFLADV LAPQLHAAFT**

161 **RFNIPMNEFP IMSR**LHGNV

Supporting Peptides:

| Peptide                             | Uniq | -10lgP | Mass      | Length | ppm  | m/z       | z | RT    | Fraction | Scan    | Source File        | Area Raw in gel | #Feature | #Feature Raw in gel | Start | End | PTM                        | AScore                               | Found By  |
|-------------------------------------|------|--------|-----------|--------|------|-----------|---|-------|----------|---------|--------------------|-----------------|----------|---------------------|-------|-----|----------------------------|--------------------------------------|-----------|
| K.VGPDEKLPWWQSVLR.K                 | Y    | 98.36  | 1721.9464 | 15     | 1.4  | 574.9902  | 3 | 34.05 | 7        | F7:1636 | OB5934 H3B raw.raw | 1.7988E6        | 5        | 5                   | 107   | 121 |                            |                                      | PEAKS DB  |
| R.AINFQATHIVSSSIQPLQNISFLNYIGEK.V   | Y    | 89.26  | 3231.6929 | 29     | 2.8  | 1078.2412 | 3 | 38.13 | 7        | F7:1882 | OB5934 H3B raw.raw | 2.7951E6        | 4        | 4                   | 78    | 106 |                            |                                      | PEAKS DB  |
| R.YATGDEIFLADVFLAPQLHAAFR.F         | Y    | 76.78  | 2665.3540 | 24     | 2.2  | 889.4606  | 3 | 40.56 | 7        | F7:2027 | OB5934 H3B raw.raw | 3.0891E6        | 4        | 4                   | 138   | 161 |                            |                                      | PEAKS DB  |
| R.FNIPMNEFPIMSR.L                   | Y    | 67.28  | 1594.7635 | 13     | 2.9  | 798.3914  | 2 | 35.91 | 2        | F2:1610 | OB5925 H3B raw.raw | 1.1285E6        | 3        | 3                   | 162   | 174 |                            |                                      | PEAKS DB  |
| R.YATGD(+45.99)EIFLADVFLAPQLHAAFR.F | Y    | 60.08  | 2711.3416 | 24     | 1.0  | 904.7887  | 3 | 40.37 | 7        | F7:2016 | OB5934 H3B raw.raw | 1.2493E6        | 2        | 2                   | 138   | 161 | Beta-methylthiolation (ND) | D5:Beta-methylthiolation (ND):102.87 | PEAKS PTM |
| K.VGPDEKLPWWQSVLRK.G                | Y    | 33.26  | 1850.0414 | 16     | -1.4 | 617.6869  | 3 | 32.38 | 2        | F2:1404 | OB5925 H3B raw.raw | 5.764E4         | 1        | 1                   | 107   | 122 |                            |                                      | PEAKS DB  |
| total 6 peptides                    |      |        |           |        |      |           |   |       |          |         |                    |                 |          |                     |       |     |                            |                                      |           |

D8KXZ8|D8KXZ8\_ARAHYback to list

| Protein Coverage | Supporting Peptides |

Protein Coverage:



1 MATTPFSGLQ TAMSRSCIPS SQRSNVMAFS GKSMVGSWNK LASVCHVSSV QPFQRVFTSS TIKFERIVTK AMSDSSQKSL

81 VSGLPIDLKG KRAFIAGVAD DNGYGWAIK ALAAAGAQIL VGTWVPALNI FESSLRGKF DESRVLPDGS LMEITKVYPL

161 DAVFDNPEDV PEDIKTNKRY AGSSKWTVQE VAESVKEDFG TIDILVHSLA NGPEVTKPLL ETSRNGYLAA LSASSYSYVS

241 LLKHFLPIMN PGGSSISLTY IASEKIIPGY GGMSSAKAA LESDTRVLAF EAGRKRKIRV NTISAGPLRS RAAKAIGFID

321 MMIDYSIANA PLQKELSADE VGNSAAFLAS PLASAITGTV LYVDNGLNAM GVGVDSPVFK DLDIPKDQH

Supporting Peptides:

| Peptide                      | Uniq | -10lgP | Mass      | Length | ppm  | m/z       | z | RT    | Fraction | Scan     | Source File        | Area Raw in gel | #Feature | #Feature Raw in gel | Start | End | PTM | AScore | Found By |
|------------------------------|------|--------|-----------|--------|------|-----------|---|-------|----------|----------|--------------------|-----------------|----------|---------------------|-------|-----|-----|--------|----------|
| K.AIGFIDMMIDYSIANAPLQK.E     | N    | 100.82 | 2210.1116 | 20     | 3.4  | 1106.0668 | 2 | 40.60 | 11       | F11:2085 | OB5938 H3A raw.raw | 0               | 0        | 0                   | 315   | 334 |     |        | PEAKS DB |
| K.VYPLDAVFDNPEDVPEDIKTNKR.Y  | N    | 63.63  | 2673.3286 | 23     | 0.9  | 892.1176  | 3 | 33.08 | 11       | F11:1637 | OB5938 H3A raw.raw | 5.7671E5        | 3        | 3                   | 157   | 179 |     |        | PEAKS DB |
| K.ALAAGAQLVGTWVPALNIFESSLR.G | Y    | 57.47  | 2823.5759 | 27     | 3.3  | 942.2024  | 3 | 42.17 | 9        | F9:2142  | OB5936 H3A raw.raw | 0               | 0        | 0                   | 111   | 137 |     |        | PEAKS DB |
| R.VNTISAGPLR.S               | N    | 55.49  | 1026.5822 | 10     | 1.4  | 514.2991  | 2 | 27.48 | 10       | F10:1306 | OB5937 H3A raw.raw | 3.2787E3        | 1        | 1                   | 300   | 309 |     |        | PEAKS DB |
| K.ALAAGAQLVGTWVPALNIFESSLR.R | Y    | 55.41  | 2667.4749 | 26     | 3.2  | 1334.7490 | 2 | 42.57 | 10       | F10:2189 | OB5937 H3A raw.raw | 1.6879E4        | 2        | 2                   | 111   | 136 |     |        | PEAKS DB |
| K.SLVSGLPIDLK.G              | N    | 39.53  | 1140.6754 | 11     | -0.5 | 571.3447  | 2 | 34.19 | 10       | F10:1708 | OB5937 H3A raw.raw | 2.8994E5        | 1        | 1                   | 79    | 89  |     |        | PEAKS DB |
| total 6 peptides             |      |        |           |        |      |           |   |       |          |          |                    |                 |          |                     |       |     |     |        |          |

sp|Q6PSU2|CONG7\_ARAHYback to list

| Protein Coverage | Supporting Peptides |

Protein Coverage:

1 MAKLTILVAL ALFLLAHAS ARQWELQGD RRCQSQLERA NLRPCEQHLM QKIQRDEDSY GRDPYSPSQD PYSFSPDPDR

81 RDPYSPSPYD RRGAGSSQHQ ERCCNELNEF ENNQRCMCEA LQQIMENQSD RLQGRQQEQQ FKRELRNLPQ QCGLRAPQRC

161 DLEVESGGRD RY

Carbamidomethylation (+57.02)  
Oxidation (M) (+15.99)

Supporting Peptides:

| Peptide                                          | Uniq | -10lgP | Mass      | Length | ppm  | m/z      | z | RT    | Fraction | Scan    | Source File        | Area Raw in gel | #Feature | #Feature Raw in gel | Start | End | PTM                                 | AScore                                                                                     | Found By  |
|--------------------------------------------------|------|--------|-----------|--------|------|----------|---|-------|----------|---------|--------------------|-----------------|----------|---------------------|-------|-----|-------------------------------------|--------------------------------------------------------------------------------------------|-----------|
| R.C(+57.02)MC(+57.02)EALQQIMENQSDRLQGR.Q         | Y    | 86.03  | 2466.0872 | 20     | 1.8  | 823.0378 | 3 | 33.67 | 2        | F2:1478 | OB5925 H3B raw.raw | 6.5263E6        | 9        | 9                   | 116   | 135 | Carbamidomethylation                | C1:Carbamidomethylat ion:1000.00;C3:Carba midomethylation:1000.00                          | PEAKS DB  |
| R.C(+57.02)C(+57.02)NELNEFENNQR.C                | Y    | 77.43  | 1725.6835 | 13     | 0.8  | 863.8497 | 2 | 28.73 | 6        | F6:1378 | OB5933 H2 raw.raw  | 2.2936E5        | 3        | 3                   | 103   | 115 | Carbamidomethylation                | C1:Carbamidomethylat ion:1000.00;C2:Carba midomethylation:1000.00                          | PEAKS DB  |
| R.ANLRPC(+57.02)EQHLMQK.I                        | Y    | 74.03  | 1623.7974 | 13     | -0.3 | 542.2729 | 3 | 28.69 | 1        | F1:1233 | OB5921 H2 raw.raw  | 2.0501E5        | 3        | 3                   | 40    | 52  | Carbamidomethylation                | C6:Carbamidomethylat ion:1000.00                                                           | PEAKS DB  |
| R.C(+71.04)C(+57.02)NELNEFENNQR.C                | Y    | 68.93  | 1739.6992 | 13     | 1.2  | 870.8580 | 2 | 28.91 | 5        | F5:1352 | OB5932 H2 raw.raw  | 1.8947E5        | 3        | 3                   | 103   | 115 | Carbamidomethylation                | C1:Propionamide:11.0 6;C2:Carbamidomethyl ation:1000.00                                    | PEAKS PTM |
| R.C(+57.02)M(+15.99)C(+57.02)EALQQIMENQSDRLQGR.Q | Y    | 59.67  | 2482.0820 | 20     | 2.0  | 828.3696 | 3 | 31.87 | 6        | F6:1563 | OB5933 H2 raw.raw  | 9.9293E5        | 4        | 4                   | 116   | 135 | Carbamidomethylation; Oxidation (M) | C1:Carbamidomethylat ion:1000.00;M2:Oxidat ion (M):73.16;C3:Carb amidomethylation:100 0.00 | PEAKS DB  |
| R.C(+71.04)MC(+57.02)EALQQIMENQSDRLQGR.Q         | Y    | 55.53  | 2480.1028 | 20     | 0.4  | 827.7086 | 3 | 33.68 | 1        | F1:1538 | OB5921 H2          | 8.4273E5        | 3        | 3                   | 116   | 135 | Carbamidomethylation                | C1:Propionamide:32.2 8;C3:Carbamidomethyl                                                  | PEAKS PTM |
| total 12 peptides                                |      |        |           |        |      |          |   |       |          |         |                    |                 |          |                     |       |     |                                     |                                                                                            |           |

| Peptide                                                  | Uniq | -10lgP | Mass      | Length | ppm  | m/z      | z | RT    | Fraction | Scan    | Source File       | Area Raw in gel | #Feature | #Feature Raw in gel | Start | End | PTM                                 | AScore                                                                                                                 | Found By |
|----------------------------------------------------------|------|--------|-----------|--------|------|----------|---|-------|----------|---------|-------------------|-----------------|----------|---------------------|-------|-----|-------------------------------------|------------------------------------------------------------------------------------------------------------------------|----------|
|                                                          |      |        |           |        |      |          |   |       |          |         | raw.raw           |                 |          |                     |       |     |                                     | ation:1000.00                                                                                                          |          |
| R.C(+57.02)M(+15.99)C(+57.02)EALQQIM(+15.99)ENQSDRLQGR.Q | Y    | 48.57  | 2498.0771 | 20     | 1.7  | 833.7010 | 3 | 29.28 | 6        | F6:1401 | OB5933 H2 raw.raw | 1.0641E5        | 2        | 2                   | 116   | 135 | Carbamidomethylation; Oxidation (M) | C1:Carbamidomethylat ion:1000.00;M2:Oxidat ion (M):1000.00;C3:Ca rbamidomethylation:10 00.00;M10:Oxidation (M):1000.00 | PEAKS DB |
| R.C(+57.02)MC(+57.02)EALQQIM(+15.99)ENQSDRLQGR.Q         | Y    | 47.95  | 2482.0820 | 20     | 1.4  | 828.3691 | 3 | 30.77 | 6        | F6:1501 | OB5933 H2 raw.raw | 2.8999E5        | 2        | 2                   | 116   | 135 | Carbamidomethylation; Oxidation (M) | C1:Carbamidomethylat ion:1000.00;C3:Carba midomethylation:1000. 00;M10:Oxidation (M): 139.69                           | PEAKS DB |
| R.C(+57.02)DLEVESGGRDRY                                  | Y    | 46.09  | 1554.6732 | 13     | 1.2  | 778.3448 | 2 | 27.26 | 5        | F5:1261 | OB5932 H2 raw.raw | 3.8274E4        | 2        | 2                   | 160   | 172 | Carbamidomethylation                | C1:Carbamidomethylat ion:1000.00                                                                                       | PEAKS DB |
| R.NLPQQC(+57.02)GLR.A                                    | Y    | 43.34  | 1084.5448 | 9      | -0.6 | 543.2794 | 2 | 25.48 | 6        | F6:1173 | OB5933 H2 raw.raw | 7.6965E4        | 2        | 2                   | 147   | 155 | Carbamidomethylation                | C6:Carbamidomethylat ion:1000.00                                                                                       | PEAKS DB |
| Q.WELQGD RR.C                                            | Y    | 36.22  | 1058.5258 | 8      | -0.7 | 530.2698 | 2 | 27.08 | 5        | F5:1254 | OB5932 H2 raw.raw | 3.4281E3        | 1        | 1                   | 25    | 32  |                                     |                                                                                                                        | PEAKS DB |
| A.RQQWELQGD RR.C                                         | Y    | 34.94  | 1470.7440 | 11     | -0.2 | 491.2552 | 3 | 27.80 | 5        | F5:1291 | OB5932 H2 raw.raw | 4.1565E4        | 1        | 1                   | 22    | 32  |                                     |                                                                                                                        | PEAKS DB |
| total 12 peptides                                        |      |        |           |        |      |          |   |       |          |         |                   |                 |          |                     |       |     |                                     |                                                                                                                        |          |

E6Y9A9|E6Y9A9\_ARAHY

back to list

| [Protein Coverage](#) | [Supporting Peptides](#) |

Protein Coverage:

1 MATTPFSG LQ TAMSRS CIPS SQRSNVMAFS GKSMVGSWNK LASVCHVSSV QPFQ RVFTSS TIKFERIVTK AMSDSSQKSL

81 VSGLPID LKG KRAFIAGVAD DNGYGWAI AK SLAAAGA QIL VGTWVPALNI FESSLR RGKF DESRVL PDGS LMEITKVYPL

161 DAVFDN PEDV PEDIKTNKR Y AGSSKWTVQE VAESVKEDFG TIDILVHSLA NGPEVTKPLL ETSRNGYLAA LSASSYSYVS

241 LLKHFLPIMN PGGSSISLTY IASEKIIPGY GGGMSSAKAA LESDTRVLAF EAGRKRKIRV NTISAGPLRS RAAKAIGFID

321 MMIDYSIANA PLQKELSADE VGNSAAFLAS PLASAITGTV LYVDNGLNAM GVGVDSPVFK DLDIPK DQH

Supporting Peptides:

| Peptide                         | Uniq | -10lgP | Mass      | Length | ppm  | m/z       | z | RT    | Fraction | Scan     | Source File        | Area Raw in gel | #Feature | #Feature Raw in gel | Start | End | PTM | AScore | Found By |
|---------------------------------|------|--------|-----------|--------|------|-----------|---|-------|----------|----------|--------------------|-----------------|----------|---------------------|-------|-----|-----|--------|----------|
| K.AIGFIDMMIDYSIANAPLQK.E        | N    | 100.82 | 2210.1116 | 20     | 3.4  | 1106.0668 | 2 | 40.60 | 11       | F11:2085 | OB5938 H3A raw.raw | 0               | 0        | 0                   | 315   | 334 |     |        | PEAKS DB |
| K.VYPLDAVFDNPEDVPEDIKTNKR.Y     | N    | 63.63  | 2673.3286 | 23     | 0.9  | 892.1176  | 3 | 33.08 | 11       | F11:1637 | OB5938 H3A raw.raw | 5.7671E5        | 3        | 3                   | 157   | 179 |     |        | PEAKS DB |
| R.VNTISAGPLR.S                  | N    | 55.49  | 1026.5822 | 10     | 1.4  | 514.2991  | 2 | 27.48 | 10       | F10:1306 | OB5937 H3A raw.raw | 3.2787E3        | 1        | 1                   | 300   | 309 |     |        | PEAKS DB |
| K.SLAAAGA QILVGTWVPALNIFESSLR.R | Y    | 43.83  | 2839.5708 | 27     | -2.5 | 947.5285  | 3 | 41.70 | 11       | F11:2149 | OB5938 H3A raw.raw | 1.1751E4        | 1        | 1                   | 111   | 137 |     |        | PEAKS DB |
| K.SLVSGLPID LK.G                | N    | 39.53  | 1140.6754 | 11     | -0.5 | 571.3447  | 2 | 34.19 | 10       | F10:1708 | OB5937 H3A raw.raw | 2.8994E5        | 1        | 1                   | 79    | 89  |     |        | PEAKS DB |
| total 5 peptides                |      |        |           |        |      |           |   |       |          |          |                    |                 |          |                     |       |     |     |        |          |

O20356|O20356\_ARAHY

back to list

| [Protein Coverage](#) | [Supporting Peptides](#) |

Protein Coverage:

1 VGFKAGVKDY KLTYYTPEYE TKDTDILAAF RVTPQPGVPP EEAGAAVAEE SSTGTWTTVW TDGLTSLDRY KGRCYNIEPV

81 AGEENQYIAY VAYPLDLFEE GSVTNMFTSI VGNVFGFKAL RALRLEDLRI PISYIKTFQG PPHGIQVERD KLNKYGRPLL

161 GCTIKPKLGL SAKNYGRAVY ECLRGGLDFT KDDENVNSQP FMRWRDRFLF CAEAIKFSQA ETGEIKGHYL NATAGTCEEM

241 IKRAVFAREL GAPIVMHDYL TGGFTANTSL AHYCRDNGLL LHIHRAMHAV IDRQKNHGMH FRVLAKALRL SGGDHIHAGT

321 VVGKLEGERD ITLGFVDLLR DDFIEKDRSR GIYFTQDWVS LPGVLPVASG GIHVHMPAL TEIFGDDSVL QFGGGTLGHP

401 WGNAPGAVAN RVALEACVQA RNEGRDLARE GNEIIREASK WSPELAAACE VWKAIKFEFP AMDTL

Carbamidomethylation (+57.02)

Supporting Peptides:

| Peptide                 | Uniq | -10lgP | Mass      | Length | ppm | m/z      | z | RT    | Fraction | Scan     | Source File        | Area Raw in gel | #Feature | #Feature Raw in gel | Start | End | PTM                  | AScore                          | Found By |
|-------------------------|------|--------|-----------|--------|-----|----------|---|-------|----------|----------|--------------------|-----------------|----------|---------------------|-------|-----|----------------------|---------------------------------|----------|
| R.DITLGFVDLLRDDFIEKDR.S | Y    | 84.04  | 2279.1797 | 19     | 2.4 | 760.7357 | 3 | 38.30 | 11       | F11:1951 | OB5938 H3A raw.raw | 2.0066E5        | 1        | 1                   | 330   | 348 |                      |                                 | PEAKS DB |
| R.VALEAC(+57.02)VQAR.N  | Y    | 78.81  | 1115.5757 | 10     | 3.3 | 558.7969 | 2 | 26.89 | 11       | F11:1278 | OB5938 H3A raw.raw | 0               | 0        | 0                   | 412   | 421 | Carbamidomethylation | C6:Carbamidomethylation:1000.00 | PEAKS DB |
| R.ALRLLEDLRIPISYIK.T    | Y    | 76.51  | 1799.0669 | 15     | 0.5 | 450.7742 | 4 | 34.01 | 11       | F11:1706 | OB5938 H3A raw.raw | 1.0366E6        | 3        | 3                   | 122   | 136 |                      |                                 | PEAKS DB |
| K.TFQGPPHGIQVER.D       | Y    | 44.14  | 1464.7473 | 13     | 0.5 | 489.2566 | 3 | 30.19 | 9        | F9:1435  | OB5936 H3A raw.raw | 2.0466E4        | 2        | 2                   | 137   | 149 |                      |                                 | PEAKS DB |
| R.FLFC(+57.02)AEAIK.S   | Y    | 41.53  | 1244.6263 | 10     | 0.8 | 623.3209 | 2 | 36.22 | 11       | F11:1836 | OB5938 H3A raw.raw | 8.051E4         | 1        | 1                   | 208   | 217 | Carbamidomethylation | C4:Carbamidomethylation:1000.00 | PEAKS DB |
| R.DNGLLLHIHR.A          | Y    | 33.91  | 1186.6571 | 10     | 0.2 | 396.5597 | 3 | 28.88 | 11       | F11:1396 | OB5938 H3A raw.raw | 0               | 0        | 0                   | 276   | 285 |                      |                                 | PEAKS DB |
| total 6 peptides        |      |        |           |        |     |          |   |       |          |          |                    |                 |          |                     |       |     |                      |                                 |          |

A0A075M981|A0A075M981\_ARAHY

back to list

| Protein Coverage | Supporting Peptides |

Protein Coverage:

1 FMLPQTETKA SVGFKAGVKD YKLTYYTPEY ETKDTDILAA FRVTPQPGVP PEEAGAAVAA ESSTGTWTTV WTDGLTSLDR

81 YKGRCYNIEP VAGEENQYIA YVAYPLDLFE EGSVTNMFTS IVGNVFGFKA LRALRLEDLR IPISYIKTFQ GPPHGIQVER

161 DKLNKYGRPL LGCTIKPKLG LSAKNYGRAV YECLRGGLDF TKDDENVNSQ PFMRWRDRFL FCAEAIKFSQ AETGEIKGHY

241 LNATAGTCEE MIKRAVFARG LGAPIVMHDY LTGGFTANTS LAHYCRDNGL LLHIHRAMHA VIDRQKNHGM HFRVLAKALR

321 LSGGDHIHAG TVVGKLEGER DITLGFVDLL RDDFIEKDRS RGIYFTQDWV SLPGVLPVAS GGIHVHMPA LTEIFGDDSV

401 LQFGGGTLGH PWGNAPGAVA NRVALEACVQ ARNEGRDLAR EGNEIIREAS KWSPELAAAC EVWKAIKFE

Carbamidomethylation (+57.02)

Supporting Peptides:

| Peptide                 | Uniq | -10lgP | Mass      | Length | ppm | m/z      | z | RT    | Fraction | Scan     | Source File        | Area Raw in gel | #Feature | #Feature Raw in gel | Start | End | PTM                  | AScore                          | Found By |
|-------------------------|------|--------|-----------|--------|-----|----------|---|-------|----------|----------|--------------------|-----------------|----------|---------------------|-------|-----|----------------------|---------------------------------|----------|
| R.DITLGFVDLLRDDFIEKDR.S | Y    | 84.04  | 2279.1797 | 19     | 2.4 | 760.7357 | 3 | 38.30 | 11       | F11:1951 | OB5938 H3A raw.raw | 2.0066E5        | 1        | 1                   | 341   | 359 |                      |                                 | PEAKS DB |
| R.VALEAC(+57.02)VQAR.N  | Y    | 78.81  | 1115.5757 | 10     | 3.3 | 558.7969 | 2 | 26.89 | 11       | F11:1278 | OB5938 H3A raw.raw | 0               | 0        | 0                   | 423   | 432 | Carbamidomethylation | C6:Carbamidomethylation:1000.00 | PEAKS DB |
| R.ALRLLEDLRIPISYIK.T    | Y    | 76.51  | 1799.0669 | 15     | 0.5 | 450.7742 | 4 | 34.01 | 11       | F11:1706 | OB5938 H3A raw.raw | 1.0366E6        | 3        | 3                   | 133   | 147 |                      |                                 | PEAKS DB |
| total 6 peptides        |      |        |           |        |     |          |   |       |          |          |                    |                 |          |                     |       |     |                      |                                 |          |

| Peptide                | Uniq | -10lgP | Mass      | Length | ppm | m/z      | z | RT    | Fraction | Scan     | Source File        | Area Raw in gel | #Feature | #Feature Raw in gel | Start | End | PTM                  | AScore                         | Found By |
|------------------------|------|--------|-----------|--------|-----|----------|---|-------|----------|----------|--------------------|-----------------|----------|---------------------|-------|-----|----------------------|--------------------------------|----------|
| K.TFQGPPhGIQVER.D      | Y    | 44.14  | 1464.7473 | 13     | 0.5 | 489.2566 | 3 | 30.19 | 9        | F9:1435  | OB5936 H3A raw.raw | 2.0466E4        | 2        | 2                   | 148   | 160 |                      |                                | PEAKS DB |
| R.FLFC(+57.02)AEAIFK.S | Y    | 41.53  | 1244.6263 | 10     | 0.8 | 623.3209 | 2 | 36.22 | 11       | F11:1836 | OB5938 H3A raw.raw | 8.051E4         | 1        | 1                   | 219   | 228 | Carbamidomethylation | C4:Carbamidomethylation:1000.0 | PEAKS DB |
| R.DNGLLLHIHR.A         | Y    | 33.91  | 1186.6571 | 10     | 0.2 | 396.5597 | 3 | 28.88 | 11       | F11:1396 | OB5938 H3A raw.raw | 0               | 0        | 0                   | 287   | 296 |                      |                                | PEAKS DB |
| total 6 peptides       |      |        |           |        |     |          |   |       |          |          |                    |                 |          |                     |       |     |                      |                                |          |

A0A191UJ50|A0A191UJ50\_ARAHY

[back to list](#)

| [Protein Coverage](#) | [Supporting Peptides](#) |

Protein Coverage:

1MSPQTETKASVGFKAGVKDYKLTYYTPEYETKDTDILAAFRTVPQPGVPP EEAGAAVAAE SSTGTWTTVW TDGLTSLDRY

81KGRCYNIEPV AGEENQYIAY VAYPLDLFEE GSVTNMFTSI VGNVFGFKALRALRLEDLRI PISYIKTFQG PPHGIQVERD

161KLNKYGRPLL GCTIKPKLGL SAKNYGRAVY ECLRGGLDFT KDDENVNSQP FMRWRDRFLF CAEAIFKSQA ETGEIKGHYL

241NATAGTCEEM IKRAVFAREL GAPIVMHDYL TGGFTANTSL AHYCRDNGLL LHIHRAMHAV IDRQKNHGMH FRVLAKALRL

321SGGDHIHAGT VVGKLEGERDITLGFVDLLR DDFIEKDRSR GIYFTQDWVS LPGVLPVASG GIHVWHMPAL TEIFGDDSVL

401QFGGGTLGHP WGNAPGAVANRVALEACVQARNEGRDLARE GNEIIREASK WSPELAAACE VWKAIKFEFP AMDTL

Carbamidomethylation (+57.02)

Supporting Peptides:

| Peptide                 | Uniq | -10lgP | Mass      | Length | ppm | m/z      | z | RT    | Fraction | Scan     | Source File        | Area Raw in gel | #Feature | #Feature Raw in gel | Start | End | PTM                  | AScore                         | Found By |
|-------------------------|------|--------|-----------|--------|-----|----------|---|-------|----------|----------|--------------------|-----------------|----------|---------------------|-------|-----|----------------------|--------------------------------|----------|
| R.DITLGFVDLLRDDFIEKDR.S | Y    | 84.04  | 2279.1797 | 19     | 2.4 | 760.7357 | 3 | 38.30 | 11       | F11:1951 | OB5938 H3A raw.raw | 2.0066E5        | 1        | 1                   | 340   | 358 |                      |                                | PEAKS DB |
| R.VALEAC(+57.02)VQAR.N  | Y    | 78.81  | 1115.5757 | 10     | 3.3 | 558.7969 | 2 | 26.89 | 11       | F11:1278 | OB5938 H3A raw.raw | 0               | 0        | 0                   | 422   | 431 | Carbamidomethylation | C6:Carbamidomethylation:1000.0 | PEAKS DB |
| R.ALRLDLRIPISYIK.T      | Y    | 76.51  | 1799.0669 | 15     | 0.5 | 450.7742 | 4 | 34.01 | 11       | F11:1706 | OB5938 H3A raw.raw | 1.0366E6        | 3        | 3                   | 132   | 146 |                      |                                | PEAKS DB |
| K.TFQGPPhGIQVER.D       | Y    | 44.14  | 1464.7473 | 13     | 0.5 | 489.2566 | 3 | 30.19 | 9        | F9:1435  | OB5936 H3A raw.raw | 2.0466E4        | 2        | 2                   | 147   | 159 |                      |                                | PEAKS DB |
| R.FLFC(+57.02)AEAIFK.S  | Y    | 41.53  | 1244.6263 | 10     | 0.8 | 623.3209 | 2 | 36.22 | 11       | F11:1836 | OB5938 H3A raw.raw | 8.051E4         | 1        | 1                   | 218   | 227 | Carbamidomethylation | C4:Carbamidomethylation:1000.0 | PEAKS DB |
| R.DNGLLLHIHR.A          | Y    | 33.91  | 1186.6571 | 10     | 0.2 | 396.5597 | 3 | 28.88 | 11       | F11:1396 | OB5938 H3A raw.raw | 0               | 0        | 0                   | 286   | 295 |                      |                                | PEAKS DB |
| total 6 peptides        |      |        |           |        |     |          |   |       |          |          |                    |                 |          |                     |       |     |                      |                                |          |

N1NKG9|N1NKG9\_ARAHY

[back to list](#)

| [Protein Coverage](#) | [Supporting Peptides](#) |

Protein Coverage:

1MSQEQRHRRPE ESDPIKYGDV FNVSGELAQK PVKPEDAAMM QSAETRVLGK TQPGGAAAAM QSAATLNEQA GLVGHHHDVNE

81VAGDRGVTVT DMQAPGRRIVTESVGGQVVG QYVEPTPVQS SRASAVRESA ITIGEALAT AQTVGSKPVE QSDAAAIQAA

161EVRATGSNVI QPGGLAAMAQ SAVAFNAGCR NPRDKIKLAD ILTGATAKLP ADKAATHQDA EGVASAEARN NTGGTTPGGV

241AASVAAAAARL NENVNV

Supporting Peptides:

| Peptide | Uniq | -10lgP | Mass | Length | ppm | m/z | z | RT | Fraction | Scan | Source File | Area Raw in gel | #Feature | #Feature Raw in gel | Start | End | PTM | AScore | Found By |
|---------|------|--------|------|--------|-----|-----|---|----|----------|------|-------------|-----------------|----------|---------------------|-------|-----|-----|--------|----------|
|---------|------|--------|------|--------|-----|-----|---|----|----------|------|-------------|-----------------|----------|---------------------|-------|-----|-----|--------|----------|

| Peptide                                  | Uniq | -10lgP | Mass      | Length | ppm | m/z       | z | RT    | Fraction | Scan     | Source File        | Area Raw in gel | #Feature | #Feature Raw in gel | Start | End | PTM | AScore                                | Found By  |
|------------------------------------------|------|--------|-----------|--------|-----|-----------|---|-------|----------|----------|--------------------|-----------------|----------|---------------------|-------|-----|-----|---------------------------------------|-----------|
| R.ESAITIGEALATAQTVGSKPVEQSDAAAIQAAEV.R.A | Y    | 89.79  | 3610.8325 | 36     | 1.7 | 1204.6201 | 3 | 35.85 | 11       | F11:1809 | OB5938 H3A raw.raw | 2.358E6         | 4        | 4                   | 128   | 163 |     |                                       | PEAKS DB  |
| K.LADILTGATAK.L                          | Y    | 84.03  | 1072.6128 | 11     | 0.5 | 537.3140  | 2 | 29.90 | 10       | F10:1453 | OB5937 H3A raw.raw | 1.4089E5        | 3        | 3                   | 198   | 208 |     |                                       | PEAKS DB  |
| R.IVTESVGGQVVGQYVEPTPVQSSR.A             | Y    | 78.52  | 2515.2917 | 24     | 3.6 | 1258.6577 | 2 | 31.58 | 11       | F11:1559 | OB5938 H3A raw.raw | 1.1935E5        | 2        | 2                   | 99    | 122 |     |                                       | PEAKS DB  |
| R.NNTGGTTPGGVAASVAAAAR.L                 | Y    | 63.04  | 1741.8707 | 20     | 1.0 | 871.9435  | 2 | 32.21 | 9        | F9:1555  | OB5936 H3A raw.raw | 9.5216E4        | 3        | 3                   | 230   | 249 |     |                                       | PEAKS DB  |
| R.IVTESVGGQ(+.98)VVGQYVEPTPVQSSR.A       | Y    | 52.37  | 2516.2759 | 24     | 9.6 | 1259.1573 | 2 | 31.77 | 7        | F7:1521  | OB5934 H3B raw.raw | 9.01E3          | 1        | 1                   | 99    | 122 |     | Q9:Deamidation (NQ):48.43             | PEAKS DB  |
| R.NNTGGTTPGGVAASVAAAAR(+15.99).L         | Y    | 36.10  | 1757.8656 | 20     | 2.7 | 879.9424  | 2 | 30.14 | 9        | F9:1433  | OB5936 H3A raw.raw | 1.8033E4        | 1        | 1                   | 230   | 249 |     | R20:Oxidation or Hydroxylation: 20.78 | PEAKS PTM |
| total 6 peptides                         |      |        |           |        |     |           |   |       |          |          |                    |                 |          |                     |       |     |     |                                       |           |

Q42515|Q42515\_ARAHY

[back to list](#)

| [Protein Coverage](#) | [Supporting Peptides](#) |

Protein Coverage:

1MKFCNFFFTFLALIVVLQALGASAD**DDAGTIITQPLYNEFL**KHLTDSRCEAHGFYTYNAFVTAARAFPAFGTTGDDVTRKR

81ELAAFFGQTSHETTGTTNA PDEFWGYCF LREQTKEQHC DSTQAPCPAG KQYYGRGPIQLTSNSNYQLA GQAIK**ADLIN**

161**NPDLVATDAVISFK**TAIWFWMTPQGKNKPSCHDVITNAWRPTATDSAAGRA**PGYGVITNII**NGGIECGKGA NTNSNNRIGF

241YKRYCDILKI GYGSNLDCANQQHF

Carbamidomethylation (+57.02)

Supporting Peptides:

| Peptide                         | Uniq | -10lgP | Mass      | Length | ppm | m/z       | z | RT    | Fraction | Scan    | Source File        | Area Raw in gel | #Feature | #Feature Raw in gel | Start | End | PTM                  | AScore                            | Found By |
|---------------------------------|------|--------|-----------|--------|-----|-----------|---|-------|----------|---------|--------------------|-----------------|----------|---------------------|-------|-----|----------------------|-----------------------------------|----------|
| K.ADLINNPDLVATDAVISFK.T         | Y    | 96.44  | 2015.0575 | 19     | 2.8 | 1008.5388 | 2 | 36.32 | 8        | F8:1776 | OB5935 H3B raw.raw | 3.6486E5        | 3        | 3                   | 156   | 174 |                      |                                   | PEAKS DB |
| A.DDAGTIITQPLYNEFLK.H           | Y    | 94.08  | 1936.9781 | 17     | 1.8 | 969.4980  | 2 | 37.02 | 7        | F7:1823 | OB5934 H3B raw.raw | 3.7509E5        | 3        | 3                   | 25    | 41  |                      |                                   | PEAKS DB |
| R.APGYGVITNIINGGIEC(+57.02)GK.G | Y    | 67.45  | 1931.9774 | 19     | 2.8 | 966.9987  | 2 | 35.96 | 8        | F8:1755 | OB5935 H3B raw.raw | 1.6903E5        | 2        | 2                   | 210   | 228 | Carbamidomethylation | C17:Carbamidomethylation:10 00.00 | PEAKS DB |
| total 3 peptides                |      |        |           |        |     |           |   |       |          |         |                    |                 |          |                     |       |     |                      |                                   |          |

B4UW89|B4UW89\_ARAHY

[back to list](#)

| [Protein Coverage](#) | [Supporting Peptides](#) |

Protein Coverage:

1MSMIPSVFGGRRSNILDFFSLDVWDPFQDIFSVAMSGPNA SASAREASAI ASTRVDWKETPEAHVFNVDLPGLKKEEVKV

81EVEDGR**VLQISGER**SREQEQLKDRWHRVERSTGKFMR**FR**LPENANMDEIRAA**MENGVL**ITVPK**V**EEKKPEIKSIQISG

Deamidation (NQ) (+0.98)

Supporting Peptides:

| Peptide                   | Uniq | -10lgP | Mass      | Length | ppm | m/z      | z | RT    | Fraction | Scan    | Source File       | Area Raw in gel | #Feature | #Feature Raw in gel | Start | End | PTM              | AScore                      | Found By |
|---------------------------|------|--------|-----------|--------|-----|----------|---|-------|----------|---------|-------------------|-----------------|----------|---------------------|-------|-----|------------------|-----------------------------|----------|
| R.AAMENGVLITITVPK.V       | Y    | 86.90  | 1442.7803 | 14     | 1.7 | 722.3986 | 2 | 32.99 | 4        | F4:1605 | OB5931 H6 raw.raw | 1.2216E4        | 2        | 2                   | 132   | 145 |                  |                             | PEAKS DB |
| R.LPENANMDEIR.A           | Y    | 75.25  | 1300.6082 | 11     | 0.1 | 651.3114 | 2 | 28.51 | 3        | F3:1341 | OB5930 H6 raw.raw | 9.9555E3        | 2        | 2                   | 121   | 131 |                  |                             | PEAKS DB |
| R.AAMEN(+.98)GVLITITVPK.V | Y    | 66.74  | 1443.7643 | 14     | 2.8 | 722.8914 | 2 | 33.41 | 4        | F4:1632 | OB5931 H6 raw.raw | 0               | 0        | 0                   | 132   | 145 | Deamidation (NQ) | N5:Deamidation (NQ):1000.00 | PEAKS DB |
| R.FRLPENANMDEIR.A         | Y    | 45.65  | 1603.7776 | 13     | 1.5 | 802.8973 | 2 | 32.99 | 4        | F4:1613 | OB5931 H6 raw.raw | 1.3562E4        | 2        | 2                   | 119   | 131 |                  |                             | PEAKS DB |
| R.VLQISGER.S              | Y    | 40.10  | 900.5029  | 8      | 1.1 | 451.2592 | 2 | 25.82 | 6        | F6:1202 | OB5933 H2 raw.raw | 1.3543E3        | 1        | 1                   | 87    | 94  |                  |                             | PEAKS DB |
| total 5 peptides          |      |        |           |        |     |          |   |       |          |         |                   |                 |          |                     |       |     |                  |                             |          |

A0A0R4UXQ1|A0A0R4UXQ1\_ARAHY

[back to list](#)

| [Protein Coverage](#) | [Supporting Peptides](#) |

Protein Coverage:

1MEKAINRQKVLLHHLNPSSSNVDLSSSSSI FASVCLAGDS AAYQRTGVFG DDVVIVAAYR TAICKAKRGG FKDTPADDLL

81APVLKAVVEK **TNLNPSEVGD IVVGSVLAPG ALR**ATECRMA AFYAGFPETV PVRTVNRQCS SGLQAVADVA ASIRAGFYEI

161GIGAGLESMS TNAMGWDGDV NPKVKQFEQA RNCLLPMGVT SENVAQRFGV SRKEQDQAAV ESHRRAAAAAT AAGKFKDEII

241PVSTKIVDPK **TGDETPVTIS VDDGIRPNAS VADLGK**LKPV FKKDGSTTAG NSSQVSDGAG AVLLMKRSTA MQKGLPILGV

321FRSFSAVGVD PAIMGVGPAA AIPVAVK**AAG LE**DDIDLFE **INEAFASQFV YCR**NKLGLDA EKINVNGGAM ALGHPLGATG

401ARCTATLLHE MKRRGKDCRF GVISMCI GTG MGAAAVFERG DGVDELSNAR KVATNNLLSK DAR

Carbamidomethylation (+57.02)

Supporting Peptides:

| Peptide                               | Uniq | -10lgP | Mass      | Length | ppm | m/z       | z | RT    | Fraction | Scan     | Source File        | Area Raw in gel | #Feature | #Feature Raw in gel | Start | End | PTM                  | AScore                           | Found By |
|---------------------------------------|------|--------|-----------|--------|-----|-----------|---|-------|----------|----------|--------------------|-----------------|----------|---------------------|-------|-----|----------------------|----------------------------------|----------|
| K.TNLNPSEVGDIVVGSVLAPGALR.A           | Y    | 105.64 | 2277.2329 | 23     | 1.4 | 1139.6254 | 2 | 37.36 | 11       | F11:1898 | OB5938 H3A raw.raw | 4.468E5         | 2        | 2                   | 91    | 113 |                      |                                  | PEAKS DB |
| K.TGDETPVTISVDDGIRPNASVADLGK.L        | Y    | 50.70  | 2626.3086 | 26     | 3.0 | 876.4461  | 3 | 32.33 | 10       | F10:1599 | OB5937 H3A raw.raw | 4.6998E5        | 2        | 2                   | 251   | 276 |                      |                                  | PEAKS DB |
| K.AAGLEDDIDLFEINEAFASQFVYC(+57.02)R.N | Y    | 49.27  | 3005.4116 | 26     | 5.1 | 1503.7207 | 2 | 42.64 | 9        | F9:2172  | OB5936 H3A raw.raw | 2.4389E4        | 1        | 1                   | 348   | 373 | Carbamidomethylation | C25:Carbamidomethylation:1000.00 | PEAKS DB |
| total 3 peptides                      |      |        |           |        |     |           |   |       |          |          |                    |                 |          |                     |       |     |                      |                                  |          |

D4NXQ0|D4NXQ0\_ARAHY

back to list

| Protein Coverage | Supporting Peptides |

Protein Coverage:

1MKSMRIHVLF LFSLLSTIPH YSYASVNDFC VADLKGPDSP SGYNCKPVSA VTADDFVYSG LVAGDTNNTF K**AALTS**AFVT

81**DFPAVN**GLGV **SAAR**LDDIAKG GSIPMHTHPG ATELLIMVEG EITAGFMTPF ALYSKTLKPG DVFVFPQGGQL HFQVNSGKKK

161ATAFLAFSSA NPGAQLDLLL LFGNALSSDI VAQTTFLDID QVKKLKARFG GKNLSKHMMSM

Deamidation (NQ) (+0.98)

Supporting Peptides:

| Peptide                          | Uniq | -10lgP | Mass      | Length | ppm | m/z       | z | RT    | Fraction | Scan    | Source File        | Area Raw in gel | #Feature | #Feature Raw in gel | Start | End | PTM              | AScore                       | Found By |
|----------------------------------|------|--------|-----------|--------|-----|-----------|---|-------|----------|---------|--------------------|-----------------|----------|---------------------|-------|-----|------------------|------------------------------|----------|
| K.AALTSAFVTDFAVNGLGVSAAR.L       | Y    | 128.12 | 2234.1694 | 23     | 2.4 | 1118.0947 | 2 | 36.64 | 7        | F7:1799 | OB5934 H3B raw.raw | 4.1064E5        | 3        | 3                   | 72    | 94  |                  |                              | PEAKS DB |
| K.AALTSAFVTDFAVN(+.98)GLGVSAAR.L | Y    | 53.20  | 2235.1536 | 23     | 4.7 | 1118.5894 | 2 | 36.72 | 8        | F8:1796 | OB5935 H3B raw.raw | 0               | 0        | 0                   | 72    | 94  | Deamidation (NQ) | N15:Deamidation (NQ):1000.00 | PEAKS DB |
| total 2 peptides                 |      |        |           |        |     |           |   |       |          |         |                    |                 |          |                     |       |     |                  |                              |          |

A7LIS5|A7LIS5\_ARAHY

back to list

| Protein Coverage | Supporting Peptides |

Protein Coverage:

1MKSMRIHVLF LFSLLSTIPH YSYASVNDFC VADLKGPDSP SGYNCKPVSA VTADDFVYSG LVAGDTNNTF K**AALTS**AFVT

81**DFPAVN**GLGV **SAAR**LDDIAKG GSIPMHTHPG ATELLIMVEG EITAGFMTPF ALYSKTLKPG DVFVFPQGGQL HFQVNSGKKK

161ATAFLAFSSA NPGAQLDLLL LFGNALSSDI VAQTTFLDID QVKKLKARFG GKNLNNHMMSM

Deamidation (NQ) (+0.98)

Supporting Peptides:

| Peptide                          | Uniq | -10lgP | Mass      | Length | ppm | m/z       | z | RT    | Fraction | Scan    | Source File        | Area Raw in gel | #Feature | #Feature Raw in gel | Start | End | PTM              | AScore                       | Found By |
|----------------------------------|------|--------|-----------|--------|-----|-----------|---|-------|----------|---------|--------------------|-----------------|----------|---------------------|-------|-----|------------------|------------------------------|----------|
| K.AALTSAFVTDFAVNGLVSAAR.L        | Y    | 128.12 | 2234.1694 | 23     | 2.4 | 1118.0947 | 2 | 36.64 | 7        | F7:1799 | OB5934 H3B raw.raw | 4.1064E5        | 3        | 3                   | 72    | 94  |                  |                              | PEAKS DB |
| K.AALTSAFVTDFAVN(+.98)GLGVSAAR.L | Y    | 53.20  | 2235.1536 | 23     | 4.7 | 1118.5894 | 2 | 36.72 | 8        | F8:1796 | OB5935 H3B raw.raw | 0               | 0        | 0                   | 72    | 94  | Deamidation (NQ) | N15:Deamidation (NQ):1000.00 | PEAKS DB |
| total 2 peptides                 |      |        |           |        |     |           |   |       |          |         |                    |                 |          |                     |       |     |                  |                              |          |

B4UWD5|B4UWD5\_ARAHY

back to list

| [Protein Coverage](#) | [Supporting Peptides](#) |

Protein Coverage:

1MARYDR**AITV FSPDGHLFQV EYALEAVR**KG NAAVGVRGTD NVVLGVEKKS TAKLQDSRTV RKIVNLDDHI ALACAGLKAD

81ARVLINRARV ECQSHR**LIVE DPVTVEYITR**YIAGLHQSYT QSGGVRPFGL STLIVGF

Supporting Peptides:

| Peptide                    | Uniq | -10lgP | Mass      | Length | ppm | m/z      | z | RT    | Fraction | Scan    | Source File        | Area Raw in gel | #Feature | #Feature Raw in gel | Start | End | PTM | AScore | Found By |
|----------------------------|------|--------|-----------|--------|-----|----------|---|-------|----------|---------|--------------------|-----------------|----------|---------------------|-------|-----|-----|--------|----------|
| R.LTVEDPVTVEYITR.Y         | Y    | 94.75  | 1633.8563 | 14     | 2.5 | 817.9375 | 2 | 33.34 | 8        | F8:1599 | OB5935 H3B raw.raw | 9.0801E5        | 3        | 3                   | 97    | 110 |     |        | PEAKS DB |
| R.AITVFSPDGHLFQVEYALEAVR.K | Y    | 50.65  | 2461.2642 | 22     | 5.9 | 821.4335 | 3 | 38.74 | 2        | F2:1769 | OB5925 H3B raw.raw | 2.6576E5        | 1        | 1                   | 7     | 28  |     |        | PEAKS DB |
| total 2 peptides           |      |        |           |        |     |          |   |       |          |         |                    |                 |          |                     |       |     |     |        |          |

Q45W80|Q45W80\_ARAHY

back to list

| [Protein Coverage](#) | [Supporting Peptides](#) |

Protein Coverage:

1**MAEQTFIMIK PDGVQRGLVG EIISRFEK**KG FYLKGLKLIT VDRPFAERHY SDLSAKPFFN GLVEYIISGP VVAMVWEGKG  Acetylation (Protein N-term) (+42.01)

81VVATGRK**LIG ATNPLASEPG TIR**GDFAIDI GRNVIHGSDS VESATKEIAL WFPEGPANWQ SSLHSWIYE

Supporting Peptides:

| Peptide                     | Uniq | -10lgP | Mass      | Length | ppm | m/z      | z | RT    | Fraction | Scan    | Source File       | Area Raw in gel | #Feature | #Feature Raw in gel | Start | End | PTM                          | AScore                                  | Found By  |
|-----------------------------|------|--------|-----------|--------|-----|----------|---|-------|----------|---------|-------------------|-----------------|----------|---------------------|-------|-----|------------------------------|-----------------------------------------|-----------|
| R.GLVGEIISRFEK.K            | Y    | 66.28  | 1346.7557 | 12     | 0.4 | 674.3854 | 2 | 38.32 | 3        | F3:1916 | OB5930 H6 raw.raw | 1.5957E4        | 1        | 1                   | 17    | 28  |                              |                                         | PEAKS DB  |
| M.A(+42.01)EQTFIMIKPDGVQR.G | Y    | 54.80  | 1773.9083 | 15     | 0.0 | 887.9614 | 2 | 34.01 | 3        | F3:1657 | OB5930 H6 raw.raw | 2.1082E4        | 2        | 2                   | 2     | 16  | Acetylation (Protein N-term) | A1:Acetylation (Protein N-term):1000.00 | PEAKS PTM |
| K.LIGATNPLASEPGTIR.G        | Y    | 38.29  | 1608.8834 | 16     | 3.4 | 805.4517 | 2 | 31.83 | 3        | F3:1539 | OB5930 H6 raw.raw | 6.2326E3        | 1        | 1                   | 88    | 103 |                              |                                         | PEAKS DB  |
| total 3 peptides            |      |        |           |        |     |          |   |       |          |         |                   |                 |          |                     |       |     |                              |                                         |           |

E5FH22|E5FH22\_ARAHY

back to list

Prepared with PEAKS™ (bioinform.com)



| [Protein Coverage](#) | [Supporting Peptides](#) |

Protein Coverage:

1MSQQQTTPRRPQEEGQECHKDFIKYGDIFNVS

GDLASEPIMPQDAALMQATE

NQALGQTQKG

GPASVMQSAA

VTNVSAGLVG

81RGDVSSVAKD

QGICVLESKI

GVNRVITESV

GEQVVGEFVE

PNVPMKTPGS

ALDKDAITIG

EALEATT LAP

ASDKPVDQSD

161AAAIQAAEMR

ATGKNEIQPG

GLAAVAQSAA

TKNLRMTGDF

QKTTLSDVLT

DAKEKLPSDK

AVTREDAEGV

IGAEIRNKAD

241MK

TTPGGVAA

SLAAAATLNQ

NKSSS

Supporting Peptides:

| Peptide                  | Uniq | -10lgP | Mass      | Length | ppm | m/z      | z | RT    | Fraction | Scan     | Source File        | Area Raw in gel | #Feature | #Feature Raw in gel | Start | End | PTM | AScore | Found By |
|--------------------------|------|--------|-----------|--------|-----|----------|---|-------|----------|----------|--------------------|-----------------|----------|---------------------|-------|-----|-----|--------|----------|
| K.TTPGGVAASLAAAATLNQNK.S | Y    | 79.74  | 1854.9799 | 20     | 2.2 | 928.4993 | 2 | 33.30 | 2        | F2:1460  | OB5925 H3B raw.raw | 6.4018E4        | 1        | 1                   | 243   | 262 |     |        | PEAKS DB |
| K.AVTREDAEGVIGAEIR.N     | Y    | 33.63  | 1684.8744 | 16     | 1.9 | 843.4461 | 2 | 29.50 | 11       | F11:1432 | OB5938 H3A raw.raw | 0               | 0        | 0                   | 221   | 236 |     |        | PEAKS DB |
| total 2 peptides         |      |        |           |        |     |          |   |       |          |          |                    |                 |          |                     |       |     |     |        |          |

A0A290FZZ3|A0A290FZZ3\_ARAHY

back to list

| [Protein Coverage](#) | [Supporting Peptides](#) |

Protein Coverage:

1SDPSGMLSKW

IRGTDCC TWP

GLNCLFENKR

VTSISIA GQP

DQPN SFLSGT

ISSSLSKLQF

LDGIYFTNLR

NISGPFPGFL

81LNMPNLEYIY

IENSQISGRI

PDSFGNSTRK

FGAFSFGNR

LTGTVPSSLS

LLTQLTQLKL

GDNLLTGAIP

DGIRNLKNLT

161YLSIQGNQLS

GNIPDFFTSL

KNLRILELSR

NKFSGTIPAS

IATLAPT LGY

LELGHNSLSG

KIPDFLGKMK

ALDTLDLSSN

241RFTGSVPQSF

KNLTKIFNLD

LSNNLLVDPF

PEMNVKGIES

LDLSNNNLHL

GTIPKWVTSS

PIIYSLKLAK

CGIRMKLDDW

321KPSETYFYDY

IDLSGNDISG

SAIGLLNRD

YLVGFWASGN

KLKFDMGGLR

IVEKLKY

Supporting Peptides:

| Peptide               | Uniq | -10lgP | Mass      | Length | ppm  | m/z       | z | RT    | Fraction | Scan     | Source File       | Area Raw in gel | #Feature | #Feature Raw in gel | Start | End | PTM | AScore | Found By |
|-----------------------|------|--------|-----------|--------|------|-----------|---|-------|----------|----------|-------------------|-----------------|----------|---------------------|-------|-----|-----|--------|----------|
| R.LTGTVPSSLSLLTQLTK.L | Y    | 84.25  | 1999.1565 | 19     | -0.9 | 1000.5846 | 2 | 38.02 | 12       | F12:1918 | OB5939 H1 raw.raw | 1.8555E5        | 1        | 1                   | 121   | 139 |     |        | PEAKS DB |
| total 1 peptides      |      |        |           |        |      |           |   |       |          |          |                   |                 |          |                     |       |     |     |        |          |

N1NJN8|N1NJN8\_ARAHY

back to list

| [Protein Coverage](#) | [Supporting Peptides](#) |

Protein Coverage:

1MECVFGLVGK

GFAIVVADTS

AVHGILVHKT

NEEKIMK LDS

HKLMAASGEG

GDRVQFTEYI

LK

NVALYQFR

NGIPLTTSAA

81ANFTRAE LAA

ALRKLVG VVF

VQNPYAVNIL

LAGYDNHTGP

SLYYIDY LAT

LHKVDKAAFG

YASYFSLSIM

DTHYHAGMSL

161QE AIDLVDKC

ITEIRSR

LVV

APPNFVIKIV

DQHGARECAW

RQSLPSASPT

FIHN

Supporting Peptides:

| Peptide          | Uniq | -10lgP | Mass      | Length | ppm  | m/z      | z | RT    | Fraction | Scan    | Source File       | Area Raw in gel | #Feature | #Feature Raw in gel | Start | End | PTM | AScore | Found By |
|------------------|------|--------|-----------|--------|------|----------|---|-------|----------|---------|-------------------|-----------------|----------|---------------------|-------|-----|-----|--------|----------|
| K.NVALYQFR.N     | Y    | 68.32  | 1009.5345 | 8      | -0.1 | 505.7745 | 2 | 30.58 | 5        | F5:1470 | OB5932 H2 raw.raw | 1.2272E4        | 1        | 1                   | 63    | 70  |     |        | PEAKS DB |
| R.LVVAPPNFVIK.I  | Y    | 56.67  | 1195.7328 | 11     | 0.7  | 598.8741 | 2 | 33.55 | 5        | F5:1641 | OB5932 H2 raw.raw | 2.964E5         | 2        | 2                   | 178   | 188 |     |        | PEAKS DB |
| total 2 peptides |      |        |           |        |      |          |   |       |          |         |                   |                 |          |                     |       |     |     |        |          |

Q1PCR5|Q1PCR5\_ARAHY

back to list

| [Protein Coverage](#) | [Supporting Peptides](#) |

Protein Coverage:



1 SDRSHAPPVV MAAAGFRLAD TFHTGASMGG YISSQSVKKI IEINPYMLGT MAGGAADCQF WHRNLGKICR LHELANKRRI  
81 SVTGASKLLA NILYSYRGMG LSVGTMIAGW DETGPGLYYV DSEGGRLKGT RFSVGSGSPY AYGILDSGYR YDLSVDEAVE  
161 LGRRAIYHAT FRDGASGGVV SVYHVGPEGW KKWTGDDVDG LHYQYYPVVP STVEQEMAEA TGA

Supporting Peptides:

| Peptide          | Uniq | -10lgP | Mass      | Length | ppm | m/z      | z | RT    | Fraction | Scan    | Source File        | Area Raw in gel | #Feature | #Feature Raw in gel | Start | End | PTM | AScore | Found By |
|------------------|------|--------|-----------|--------|-----|----------|---|-------|----------|---------|--------------------|-----------------|----------|---------------------|-------|-----|-----|--------|----------|
| K.LLANILYSYR.G   | Y    | 95.82  | 1224.6866 | 10     | 0.8 | 613.3511 | 2 | 34.42 | 7        | F7:1667 | OB5934 H3B raw.raw | 8.8119E5        | 5        | 5                   | 88    | 97  |     |        | PEAKS DB |
| total 1 peptides |      |        |           |        |     |          |   |       |          |         |                    |                 |          |                     |       |     |     |        |          |

Q06H31|Q06H31\_ARAHY

[back to list](#)

| [Protein Coverage](#) | [Supporting Peptides](#) |

Protein Coverage:

1 MLVYQDLLTG DELLSDSFPY KEIENGILWE VEGK<sup>25</sup>WVIQGA INVDIGANPS AEGGEEDESV DDQAVK<sup>Q</sup>VVDI VDTFRLQE<sup>Q</sup>QP <sup>Q</sup> Deamidation (NQ) (+0.98)  
81 AFDKKQFVTY MKRYIKLLTA KLEPEQQEHF KKNIEGATKF LLSKLSDLQF FVGESMHDDG SLVFAYYKEG ATDPTFLYFA <sup>Q</sup> Oxidation (M) (+15.99)  
161 HGLKEIKC

Supporting Peptides:

| Peptide                                      | Uniq | -10lgP | Mass      | Length | ppm  | m/z       | z | RT    | Fraction | Scan    | Source File        | Area Raw in gel | #Feature | #Feature Raw in gel | Start | End | PTM              | AScore                      | Found By |
|----------------------------------------------|------|--------|-----------|--------|------|-----------|---|-------|----------|---------|--------------------|-----------------|----------|---------------------|-------|-----|------------------|-----------------------------|----------|
| MLVYQDLLTGDELLSDSFPYKEIENGILWEVEGK.W         | Y    | 64.83  | 3942.9487 | 34     | 3.9  | 1315.3286 | 3 | 43.02 | 7        | F7:2174 | OB5934 H3B raw.raw | 2.2514E5        | 1        | 1                   | 1     | 34  |                  |                             | PEAKS DB |
| M(+15.99)LVYQDLLTGDELLSDSFPYKEIENGILWEVEGK.W | Y    | 61.28  | 3958.9436 | 34     | 3.4  | 1320.6597 | 3 | 42.89 | 8        | F8:2152 | OB5935 H3B raw.raw | 4.2504E5        | 2        | 2                   | 1     | 34  | Oxidation (M)    | M1:Oxidation (M):10 00.00   | PEAKS DB |
| K.VVDIVDTFR.L                                | Y    | 58.97  | 1062.5709 | 9      | -0.3 | 532.2926  | 2 | 32.96 | 8        | F8:1559 | OB5935 H3B raw.raw | 1.3289E4        | 1        | 1                   | 67    | 75  |                  |                             | PEAKS DB |
| MLVYQDLLTGDELLSDSFPYKEIEN(+.98)GILWEVEGK.W   | Y    | 35.73  | 3943.9329 | 34     | 3.6  | 1315.6562 | 3 | 40.52 | 6        | F6:2071 | OB5933 H2 raw.raw  | 0               | 0        | 0                   | 1     | 34  | Deamidation (NQ) | N25:Deamidation (N Q):59.09 | PEAKS DB |
| total 4 peptides                             |      |        |           |        |      |           |   |       |          |         |                    |                 |          |                     |       |     |                  |                             |          |

Q06H23|Q06H23\_ARAHY

[back to list](#)

| [Protein Coverage](#) | [Supporting Peptides](#) |

Protein Coverage:

1 MASKRILKEL KDLQKDPPTS CSAGPVAEDM FHWQATIMGP ADSPYTGGVF LVS IHFPPDY PFKPPKVAFR TKVFHPNINS <sup>Q</sup> Carbamidomethylation (+57.02)  
81 NGSICLDILK EQWSPALTIS K<sup>107</sup>VLLSICSLL TDPNPDDPLV PEIAHMYK<sup>Q</sup>TD RAKYEATARS WTQKYAMG <sup>Q</sup> Oxidation (M) (+15.99)

Supporting Peptides:

| Peptide                                         | Uniq | -10lgP | Mass      | Length | ppm | m/z       | z | RT    | Fraction | Scan    | Source File       | Area Raw in gel | #Feature | #Feature Raw in gel | Start | End | PTM                                 | AScore                                                    | Found By |
|-------------------------------------------------|------|--------|-----------|--------|-----|-----------|---|-------|----------|---------|-------------------|-----------------|----------|---------------------|-------|-----|-------------------------------------|-----------------------------------------------------------|----------|
| K.VLLSIC(+57.02)SLLTDPNPDDPLVPEIAHM(+15.99)YK.T | Y    | 88.89  | 3065.5454 | 27     | 3.0 | 1022.8588 | 3 | 38.41 | 3        | F3:1915 | OB5930 H6 raw.raw | 2.3781E4        | 1        | 1                   | 102   | 128 | Carbamidomethylation; Oxidation (M) | C6:Carbamidomethylation:1000.00;M25:Oxidation (M):1000.00 | PEAKS DB |
| K.VLLSIC(+57.02)SLLTDPNPDDPLVPEIAHMYK.T         | Y    | 60.27  | 3049.5503 | 27     | 2.0 | 1017.5261 | 3 | 39.46 | 4        | F4:1971 | OB5931 H6 raw.raw | 7.298E4         | 1        | 1                   | 102   | 128 | Carbamidomethylation                | C6:Carbamidomethylation:1000.00                           | PEAKS DB |
| total 2 peptides                                |      |        |           |        |     |           |   |       |          |         |                   |                 |          |                     |       |     |                                     |                                                           |          |

Q1HDS7|Q1HDS7\_ARAHY

[back to list](#)

| [Protein Coverage](#) | [Supporting Peptides](#) |

Protein Coverage:

1 MVKAVAVLSS SEGVSGTIQF SQEGNGPTTV TGNLAGLKPG LHGFHVHALG DTTNGCLSTG PHFNPNNKEH GAPEDENRHA

81 GDLGNVNVGD DGTVSFSISD SQIPLSGPNS IVGRAVVVHA DPDDLKG GGH ELSKSTGNAG GRVACGIIGL QG

Supporting Peptides:

| Peptide                                  | Uniq | -10lgP | Mass      | Length | ppm | m/z       | z | RT    | Fraction | Scan    | Source File       | Area Raw in gel | #Feature | #Feature Raw in gel | Start | End | PTM | AScore | Found By |
|------------------------------------------|------|--------|-----------|--------|-----|-----------|---|-------|----------|---------|-------------------|-----------------|----------|---------------------|-------|-----|-----|--------|----------|
| R.AVVVHADPDDLKG.G                        | Y    | 63.86  | 1334.6830 | 13     | 0.7 | 668.3492  | 2 | 27.55 | 4        | F4:1279 | OB5931 H6 raw.raw | 7.1935E2        | 1        | 1                   | 115   | 127 |     |        | PEAKS DB |
| R.HAGDLGNVNVGDDGTVSFSISDSQIPLSGPNSIVGR.A | Y    | 40.27  | 3580.7393 | 36     | 4.0 | 1791.3840 | 2 | 35.84 | 4        | F4:1773 | OB5931 H6 raw.raw | 1.9646E5        | 1        | 1                   | 79    | 114 |     |        | PEAKS DB |
| total 2 peptides                         |      |        |           |        |     |           |   |       |          |         |                   |                 |          |                     |       |     |     |        |          |

Q45W82|Q45W82\_ARAHYback to list

| Protein Coverage | Supporting Peptides |

Protein Coverage:

1 MVKAVAVLSS SEGVSGTIQF SQEGNGPTTV TGNLAGLKPG LHGFHVHALG DTTNGCLSTG PHFNPNNKEH GAPEDENRHA

81 GDLGNVNVGD DGTVSFSISD SQIPLSGPNS IVGRAVVVHA DPDDLKG GGH ELSKSTGNAG GGVACGIIGL QG

Supporting Peptides:

| Peptide                                  | Uniq | -10lgP | Mass      | Length | ppm | m/z       | z | RT    | Fraction | Scan    | Source File       | Area Raw in gel | #Feature | #Feature Raw in gel | Start | End | PTM | AScore | Found By |
|------------------------------------------|------|--------|-----------|--------|-----|-----------|---|-------|----------|---------|-------------------|-----------------|----------|---------------------|-------|-----|-----|--------|----------|
| R.AVVVHADPDDLKG.G                        | Y    | 63.86  | 1334.6830 | 13     | 0.7 | 668.3492  | 2 | 27.55 | 4        | F4:1279 | OB5931 H6 raw.raw | 7.1935E2        | 1        | 1                   | 115   | 127 |     |        | PEAKS DB |
| R.HAGDLGNVNVGDDGTVSFSISDSQIPLSGPNSIVGR.A | Y    | 40.27  | 3580.7393 | 36     | 4.0 | 1791.3840 | 2 | 35.84 | 4        | F4:1773 | OB5931 H6 raw.raw | 1.9646E5        | 1        | 1                   | 79    | 114 |     |        | PEAKS DB |
| total 2 peptides                         |      |        |           |        |     |           |   |       |          |         |                   |                 |          |                     |       |     |     |        |          |

K7PQ65|K7PQ65\_ARAHYback to list

| Protein Coverage | Supporting Peptides |

Protein Coverage:

1 MCMMGASVDP LVVGRVIGDV IDMFVPSVGM SVYYGSKHVT NGCDIKPSMA ISPPKVTLTG GNIHSLYTLV MTDPDAPSPS

81 EPTMREWLHW VVVDIPGGTN PTQGKEIVAY MGPRPPVGIIHRYILILFEQK GVLGGVEQPA ARASFNTRYF ARQFNGLGLPV

161 ATVYFNSQKE PASKRR

Supporting Peptides:

| Peptide            | Uniq | -10lgP | Mass      | Length | ppm  | m/z      | z | RT    | Fraction | Scan    | Source File       | Area Raw in gel | #Feature | #Feature Raw in gel | Start | End | PTM | AScore | Found By |
|--------------------|------|--------|-----------|--------|------|----------|---|-------|----------|---------|-------------------|-----------------|----------|---------------------|-------|-----|-----|--------|----------|
| R.YILILFEQK.G      | Y    | 63.49  | 1165.6747 | 9      | -3.3 | 583.8427 | 2 | 36.41 | 3        | F3:1808 | OB5930 H6 raw.raw | 1.435E4         | 2        | 2                   | 122   | 130 |     |        | PEAKS DB |
| M.FVPSVGMSVYYGSK.H | Y    | 35.21  | 1519.7380 | 14     | 1.3  | 760.8773 | 2 | 32.86 | 3        | F3:1596 | OB5930 H6 raw.raw | 0               | 0        | 0                   | 24    | 37  |     |        | PEAKS DB |
| total 2 peptides   |      |        |           |        |      |          |   |       |          |         |                   |                 |          |                     |       |     |     |        |          |

B4UWB3|B4UWB3\_ARAHYback to list

| Protein Coverage | Supporting Peptides |

Protein Coverage:

1 MKYNPRVSSS RRKSRKAHFT APSSVRRVLM SAPLTTDLRS KYNVRSMPIR KDDEVQVVRG TYKGREGKV VQYRRKWKVIH

81 IERITREKVN GSTVNVGIHP SKVVITKLRL DKDRKSLDR KAKGRAAADK EKGTKFAPED IMQTVD

Supporting Peptides:

| Peptide          | Uniq | -10lgP | Mass      | Length | ppm | m/z      | z | RT    | Fraction | Scan    | Source File       | Area Raw in gel | #Feature | #Feature Raw in gel | Start | End | PTM | AScore | Found By |
|------------------|------|--------|-----------|--------|-----|----------|---|-------|----------|---------|-------------------|-----------------|----------|---------------------|-------|-----|-----|--------|----------|
| R.VLMSAPLTTDLR.S | Y    | 80.51  | 1315.7169 | 12     | 1.0 | 658.8664 | 2 | 32.24 | 1        | F1:1455 | OB5921 H2 raw.raw | 0               | 0        | 0                   | 28    | 39  |     |        | PEAKS DB |
| total 1 peptides |      |        |           |        |     |          |   |       |          |         |                   |                 |          |                     |       |     |     |        |          |

Q647G5|Q647G5\_ARAHYback to list

| [Protein Coverage](#) | [Supporting Peptides](#) |

Protein Coverage:

1 MTDRTQPHTV QVHTTAGRFG DTAAGTNRYP DRGPSTSKVI AVITGLPIGG TLLLFAGLAL AGTLLGLAVT TPLFILFSPV

81 IVPAlIIVVGL SVAGFLTSGA CGLTGLSSFS WVMNYIRQTH GSVPEQLEMA KHRMADVAGY VGQKTKDVGQ KTKEVGQEIQ

161 TKAQDSKRT

Supporting Peptides:

| Peptide          | Uniq | -10lgP | Mass      | Length | ppm | m/z      | z | RT    | Fraction | Scan    | Source File       | Area Raw in gel | #Feature | #Feature Raw in gel | Start | End | PTM | AScore | Found By |
|------------------|------|--------|-----------|--------|-----|----------|---|-------|----------|---------|-------------------|-----------------|----------|---------------------|-------|-----|-----|--------|----------|
| R.MADVAGYVGQK.T  | Y    | 79.23  | 1137.5488 | 11     | 0.8 | 569.7822 | 2 | 28.42 | 4        | F4:1311 | OB5931 H6 raw.raw | 4.7315E4        | 2        | 2                   | 134   | 144 |     |        | PEAKS DB |
| total 1 peptides |      |        |           |        |     |          |   |       |          |         |                   |                 |          |                     |       |     |     |        |          |

Q647G4|Q647G4\_ARAHYback to list

| [Protein Coverage](#) | [Supporting Peptides](#) |

Protein Coverage:

1 MTDRTQPHAV QVHTTAGRFG DTAAGTNRYA DRGPSTSKVI AVITGLPIGG TLLLFAGLAL AGTLLGLAVT TPLFILFSPV

81 IVPATIVVGL SVAGFLTSGA CGLTGLSSFS WVMNYIRQTH GSVPEQLEMA KHRMADVAGY VGQKTKDVGQ

Supporting Peptides:

| Peptide          | Uniq | -10lgP | Mass      | Length | ppm | m/z      | z | RT    | Fraction | Scan    | Source File       | Area Raw in gel | #Feature | #Feature Raw in gel | Start | End | PTM | AScore | Found By |
|------------------|------|--------|-----------|--------|-----|----------|---|-------|----------|---------|-------------------|-----------------|----------|---------------------|-------|-----|-----|--------|----------|
| R.MADVAGYVGQK.T  | Y    | 79.23  | 1137.5488 | 11     | 0.8 | 569.7822 | 2 | 28.42 | 4        | F4:1311 | OB5931 H6 raw.raw | 4.7315E4        | 2        | 2                   | 134   | 144 |     |        | PEAKS DB |
| total 1 peptides |      |        |           |        |     |          |   |       |          |         |                   |                 |          |                     |       |     |     |        |          |

B4UWC9|B4UWC9\_ARAHYback to list

| [Protein Coverage](#) | [Supporting Peptides](#) |

Protein Coverage:

1 MFKKFSFEDV SAQNQVKASV QRKIRQSIAE EYPGLEPVLD DILPKKSPLI VAKCQNHLNL VLVNNVPLFF SVRDGPYMPT

81 LRL LHQYPNI MKKLQVDRGA IRFVLSGANI MCPGLTSPGG ALDEEVE

Supporting Peptides:

| Peptide                  | Uniq | -10lgP | Mass      | Length | ppm | m/z       | z | RT    | Fraction | Scan    | Source File       | Area Raw in gel | #Feature | #Feature Raw in gel | Start | End | PTM | AScore | Found By |
|--------------------------|------|--------|-----------|--------|-----|-----------|---|-------|----------|---------|-------------------|-----------------|----------|---------------------|-------|-----|-----|--------|----------|
| R.QSIAEEYPGLEPVLDLILPK.K | Y    | 67.57  | 2225.1467 | 20     | 1.4 | 1113.5822 | 2 | 38.37 | 5        | F5:1928 | OB5932 H2 raw.raw | 1.231E5         | 1        | 1                   | 26    | 45  |     |        | PEAKS DB |
| total 1 peptides         |      |        |           |        |     |           |   |       |          |         |                   |                 |          |                     |       |     |     |        |          |

B4UWB2|B4UWB2\_ARAHYback to list

| [Protein Coverage](#) | [Supporting Peptides](#) |

Protein Coverage:

1 MKSSSSVIAA MICFAMVTGM AASAAEPVLD VTGQKLRSVG KYFILPVLRG RGGGLTVGSS VNSTCPIYVL QDKLEVTRGT

81 PVTFTPSTPN KDGVILTSTD LNINSTAPK CKESSVWRLL KVLSGVWFIS TDGVAGNPGV NTVVNWFKIE KDGKDYNLSF

161 CPSVCNCSTL CRALGIFTDS DGTKHLALSD QVPTFRSCSR RLN

Supporting Peptides:

| Peptide          | Uniq | -10lgP | Mass      | Length | ppm | m/z      | z | RT    | Fraction | Scan    | Source File       | Area Raw in gel | #Feature | #Feature Raw in gel | Start | End | PTM | AScore | Found By |
|------------------|------|--------|-----------|--------|-----|----------|---|-------|----------|---------|-------------------|-----------------|----------|---------------------|-------|-----|-----|--------|----------|
| K.YFILPVLR.G     | Y    | 65.65  | 1019.6168 | 8      | 0.3 | 510.8158 | 2 | 36.11 | 1        | F1:1685 | OB5921 H2 raw.raw | 2.8581E5        | 2        | 2                   | 42    | 49  |     |        | PEAKS DB |
| total 1 peptides |      |        |           |        |     |          |   |       |          |         |                   |                 |          |                     |       |     |     |        |          |

A0A290GK88|A0A290GK88\_ARAHYback to list

| [Protein Coverage](#) | [Supporting Peptides](#) |

Protein Coverage:

1 GLDLPGPVDL PPSLFNLVDL DELLIFEMPV LKGQIPPQIS NLKKLTVLVL FSTNXSGPIP ESLAQIKTLT NINLAGNNLS  
81 GPLPHLLPSL PSIRVIFADE NRISGPIPX S YGSFASXXLX TXTLSHNMLS GKIPAALKGL DAELLDLSWN KLEGDGSVLF  
161 GAEK KTEEIT LAGNMLSFDI GKVEFGRNIT RLNLKHNRIX GKLPEQLTQL KQLTRFNVSY NQL

Supporting Peptides:

| Peptide                        | Uniq | -10lgP | Mass      | Length | ppm | m/z      | z | RT    | Fraction | Scan    | Source File        | Area Raw in gel | #Feature | #Feature Raw in gel | Start | End | PTM | AScore | Found By |
|--------------------------------|------|--------|-----------|--------|-----|----------|---|-------|----------|---------|--------------------|-----------------|----------|---------------------|-------|-----|-----|--------|----------|
| K.GLDAELLDLSWNKLEGDGSVLFGAEK.K | Y    | 65.30  | 2775.3965 | 26     | 2.9 | 926.1421 | 3 | 39.81 | 9        | F9:2010 | OB5936 H3A raw.raw | 2.2447E5        | 1        | 1                   | 139   | 164 |     |        | PEAKS DB |
| total 1 peptides               |      |        |           |        |     |          |   |       |          |         |                    |                 |          |                     |       |     |     |        |          |

A0A0A1EXN0|A0A0A1EXN0\_ARAHY [back to list](#)

| [Protein Coverage](#) | [Supporting Peptides](#) |

Protein Coverage:

1 VFPSIVGRPR HTGVMVGMGQ KDAYVGDEAQ SKRGILTLYK PIEHGIVSNW DDMEKIWHHT FYNELRVAPE EHPVLLTEAP  
81 LNPKANREKM TQIMFETFN PAMYVAIQAV LSLYASGR TT GIVLDSGDGV SHTVPIYEGY ALPHAILRLD LAGRDLTDSL  
161 MKILTERGYM FT TSAEREIV RDIKEKLAYV ALDYEQELET AKSSSSVEKN YELPDGQVIT IGAERFRCPE VLFQPSMIGM  
241 EAAGIHETTY NSIMKCDVDI RKDLYGNIVL SGGSTMFPGI ADRMSKEITA LAPSSMKIKV VAPPERKYSV WIGGSILASL  
321 STF

Supporting Peptides:

| Peptide                            | Uniq | -10lgP | Mass      | Length | ppm | m/z       | z | RT    | Fraction | Scan    | Source File        | Area Raw in gel | #Feature | #Feature Raw in gel | Start | End | PTM | AScore | Found By |
|------------------------------------|------|--------|-----------|--------|-----|-----------|---|-------|----------|---------|--------------------|-----------------|----------|---------------------|-------|-----|-----|--------|----------|
| R.TTGIVLDSGDGVSHTVPIYEGYALPHAILR.L | Y    | 65.01  | 3150.6350 | 30     | 1.6 | 1051.2206 | 3 | 36.10 | 9        | F9:1789 | OB5936 H3A raw.raw | 7.7614E5        | 3        | 3                   | 119   | 148 |     |        | PEAKS DB |
| total 1 peptides                   |      |        |           |        |     |           |   |       |          |         |                    |                 |          |                     |       |     |     |        |          |

A0A0A1EUV7|A0A0A1EUV7\_ARAHY [back to list](#)

| [Protein Coverage](#) | [Supporting Peptides](#) |

Protein Coverage:

1 VFPSIVGRPR HTGVMVGMGQ KDAYVGDEAQ SKRGILTLYK PIEHGIVSNW DDMEKIWHHT FYNELRVAPE EHPVLLTEAP  
81 LNPKANREKM TQIMFETFN PAMHVAIQAV LSLYASGR TT GIVLDSGDGV SHTVPIYEGY ALPHAILRLD LAGRDLTDDL  
161 MKILTERGYS FT TSAEREIV RDMKEKLSYI ALDYEQELET SKTSSAVEKS YELPDGQVIT IGAERFRCPE VLFQPSMIGM  
241 EAAGIHETTY NSIMKCDVDI RKDLYGNIVL SGGTTMFPGI ADRMSKEISA LAPSSMKIKV VAPPERKYSV WIGGSILASL  
321 STF

Supporting Peptides:

| Peptide                            | Uniq | -10lgP | Mass      | Length | ppm | m/z       | z | RT    | Fraction | Scan    | Source File        | Area Raw in gel | #Feature | #Feature Raw in gel | Start | End | PTM | AScore | Found By |
|------------------------------------|------|--------|-----------|--------|-----|-----------|---|-------|----------|---------|--------------------|-----------------|----------|---------------------|-------|-----|-----|--------|----------|
| R.TTGIVLDSGDGVSHTVPIYEGYALPHAILR.L | Y    | 65.01  | 3150.6350 | 30     | 1.6 | 1051.2206 | 3 | 36.10 | 9        | F9:1789 | OB5936 H3A raw.raw | 7.7614E5        | 3        | 3                   | 119   | 148 |     |        | PEAKS DB |
| total 1 peptides                   |      |        |           |        |     |           |   |       |          |         |                    |                 |          |                     |       |     |     |        |          |

A0A0A1ESG0|A0A0A1ESG0\_ARAHY [back to list](#)

| [Protein Coverage](#) | [Supporting Peptides](#) |

Protein Coverage:

1 VFPSIVGRPR HTGVMVGMGQ KDAYVGDEAQ SKRGILTLYK PIEHGIVSNW DDMEKIWHHT FYNELRVAPE EHPVLLTEAP  
81 LNPKANREKM TQIMFETFNV PAMYVAIQAV LSLYASGR**TT GIVLDSGDGV SHTVPIYEGY ALPHAILR**LD LAGRDLTDSL  
161 MKILTERGYM FT TSAEREIV RDIKEKLAYV ALDYEQLEET AKSSSAVEKN YELPDGQVIT IGAERFRCPE VLFQPSMIGM  
241 EAAGIHETTY NSIMKCDVDI RKDLYGNIVL SGGSTMFPGI ADRMSKEITA LAPSSMKIKV VAPPERKYSV WIGGSILASL  
321 STF

Supporting Peptides:

| Peptide                            | Uniq | -10lgP | Mass      | Length | ppm | m/z       | z | RT    | Fraction | Scan    | Source File        | Area Raw in gel | #Feature | #Feature Raw in gel | Start | End | PTM | AScore | Found By |
|------------------------------------|------|--------|-----------|--------|-----|-----------|---|-------|----------|---------|--------------------|-----------------|----------|---------------------|-------|-----|-----|--------|----------|
| R.TTGIVLDSGDGVSHTVPIYEGYALPHAILR.L | Y    | 65.01  | 3150.6350 | 30     | 1.6 | 1051.2206 | 3 | 36.10 | 9        | F9:1789 | OB5936 H3A raw.raw | 7.7614E5        | 3        | 3                   | 119   | 148 |     |        | PEAKS DB |
| total 1 peptides                   |      |        |           |        |     |           |   |       |          |         |                    |                 |          |                     |       |     |     |        |          |

Q45W77|Q45W77\_ARAHY

back to list

| [Protein Coverage](#) | [Supporting Peptides](#) |

Protein Coverage:

1 MANSNLPRI IKETQR**LLSE PAPGISASPS EDNMR**YFNMV ILGPTQSPYE GGVFKLELFL PEEYPMAPK VRFLTKEYHP  
81 NIDKLGRICL DILKDKWSPA LQIRTVLLSI QALLSAPNPD DPLSENIAKH WKSNEAEAVE TAKEWTRLYA SGA

Supporting Peptides:

| Peptide                 | Uniq | -10lgP | Mass      | Length | ppm | m/z      | z | RT    | Fraction | Scan    | Source File       | Area Raw in gel | #Feature | #Feature Raw in gel | Start | End | PTM | AScore | Found By |
|-------------------------|------|--------|-----------|--------|-----|----------|---|-------|----------|---------|-------------------|-----------------|----------|---------------------|-------|-----|-----|--------|----------|
| R.LLSEPAPGISASPSEDNMR.Y | Y    | 60.66  | 1969.9414 | 19     | 2.5 | 985.9805 | 2 | 30.39 | 3        | F3:1454 | OB5930 H6 raw.raw | 5.3162E3        | 1        | 1                   | 17    | 35  |     |        | PEAKS DB |
| total 1 peptides        |      |        |           |        |     |          |   |       |          |         |                   |                 |          |                     |       |     |     |        |          |

F8UX79|F8UX79\_ARAHY

back to list

| [Protein Coverage](#) | [Supporting Peptides](#) |

Protein Coverage:

1 MASATLSVAK PALQNGGKG FSEFSGLRNS SSSYLPFSRK TSDDFHSIIS FQTSAVGSSG GYRKGVT EAK LK**VAINGFGR**  
81 IGRNFLRCWH GRKDSPLDVI AINDTGGVKQ ASHLLKYDST LGIFDADVKP VGEDAISVDG KVIKVVSNRN PANLPWKELG  
161 VDLVIEGTGV FVDREGAGKH IQAGAKKVL I TAPGKGDIPT YVGVNADAY SPDEPIISNA SCTTNCLAPP VKVLDQKFGI  
241 IKGTMTTTHS YTG DQRLLD A SHRDLRRARA AALNIVPTST GAAKAVALVL PTLKGKLNGI ALRVPTPNVS VVDLVVQVSK  
321 KTFAEEVNAA FRESAEKELN GILSV CDEPL VSVDFRCTDV SSTVDSSLTM VMGDDMVKVI AWYDNEWGYS QRVVDLADIV  
401 ANSWK

76  
d

VAINGFGR

d

Deamidation (NQ) (+0.98)

Supporting Peptides:

| Peptide           | Uniq | -10lgP | Mass     | Length | ppm | m/z      | z | RT    | Fraction | Scan     | Source File        | Area Raw in gel | #Feature | #Feature Raw in gel | Start | End | PTM              | AScore                      | Found By |
|-------------------|------|--------|----------|--------|-----|----------|---|-------|----------|----------|--------------------|-----------------|----------|---------------------|-------|-----|------------------|-----------------------------|----------|
| K.VAIN(+.98)GFGRI | Y    | 57.87  | 833.4395 | 8      | 0.1 | 417.7271 | 2 | 30.08 | 10       | F10:1489 | OB5937 H3A raw.raw | 6.5904E5        | 3        | 3                   | 73    | 80  | Deamidation (NQ) | N4:Deamidation (NQ):1000.00 | PEAKS DB |
| K.VAINGFGR.I      | Y    | 50.26  | 832.4555 | 8      | 2.0 | 417.2359 | 2 | 29.51 | 10       | F10:1408 | OB5937 H3A raw.raw | 3.9665E5        | 3        | 3                   | 73    | 80  |                  |                             | PEAKS DB |
| total 2 peptides  |      |        |          |        |     |          |   |       |          |          |                    |                 |          |                     |       |     |                  |                             |          |

B4UW57|B4UW57\_ARAHY

back to list

| [Protein Coverage](#) | [Supporting Peptides](#) |

Protein Coverage:

1 MASSASAGAS ARVDLDGNPI KPLTICMIGA GGGFIGSHLCE KLMSETQHKV LALDVYNDKI KHLLEPDNLP WHGRITFHRL  Carbamidomethylation (+57.02)

81 NIKHDSRLEG LIKMSDLTIN LAAICTPADY NTRPLDTIYS NFIDALPVVK YCSENNKR**LI HFSTCEVYGK** TIGSFLPKDS

161 PLRQDPAYYV LKEDESPCIF GSIEQRWSY ACAKQLIERL IYAEGAENG M EFTNVRA

Supporting Peptides:

| Peptide                   | Uniq | -10lgP | Mass      | Length | ppm | m/z      | z | RT    | Fraction | Scan     | Source File        | Area Raw in gel | #Feature | #Feature Raw in gel | Start | End | PTM                  | AScore                          | Found By |
|---------------------------|------|--------|-----------|--------|-----|----------|---|-------|----------|----------|--------------------|-----------------|----------|---------------------|-------|-----|----------------------|---------------------------------|----------|
| R.LIHFTSC(+57.02)EVY GK.T | Y    | 53.39  | 1452.7072 | 12     | 0.0 | 727.3608 | 2 | 29.33 | 11       | F11:1430 | OB5938 H3A raw.raw | 3.2436E4        | 2        | 2                   | 139   | 150 | Carbamidomethylation | C7:Carbamidomethylation:1000.00 | PEAKS DB |
| total 1 peptides          |      |        |           |        |     |          |   |       |          |          |                    |                 |          |                     |       |     |                      |                                 |          |

E9JSA9|E9JSA9\_ARAHY [back to list](#)

| [Protein Coverage](#) | [Supporting Peptides](#) |

Protein Coverage:

1 MALRLNPNPS QKLFLSPSSS SSSSSSFSLP QMASLRSPRF RMASTLRTGS KEVENLKKPF TPPREHVHVQV THSMPPQKIE

81 IFKSLEGWAE ENILTLLKPV EKCWQPQDYL PEPSEDFEE QVRELRAK ELRDDYFVVL VGDMITEEAL PTYQTMNLNTL

161 DGVREDETAS LTSWAVWTRA WTAEENRHGD LLNKYLKLSG RVDLRQIEKT IQYLIGSGMD PRTEENSPYLG FIYTSFQERA

241 TFISHGNTAR LAKEHGDMKL AQICGMIASD EKRHETAYTK IVEKLFEIDP DGTVMFAFADM MRKKIAMPAN LMYDGRDDNL

321 FESYSAVAQR **IGVYTAKDYA DILEFLVGRW** KVADLTGLSG EGRKAQDYVC GLPPRIIRLE ERAQGRAKES PRLKFSWIYD

401 REVQL

Supporting Peptides:

| Peptide                 | Uniq | -10lgP | Mass      | Length | ppm | m/z       | z | RT    | Fraction | Scan     | Source File        | Area Raw in gel | #Feature | #Feature Raw in gel | Start | End | PTM | AScore | Found By |
|-------------------------|------|--------|-----------|--------|-----|-----------|---|-------|----------|----------|--------------------|-----------------|----------|---------------------|-------|-----|-----|--------|----------|
| R.IGVYTAKDYADILEFLVGR.W | Y    | 44.46  | 2142.1360 | 19     | 1.5 | 1072.0769 | 2 | 39.60 | 10       | F10:2024 | OB5937 H3A raw.raw | 3.8207E4        | 1        | 1                   | 331   | 349 |     |        | PEAKS DB |
| total 1 peptides        |      |        |           |        |     |           |   |       |          |          |                    |                 |          |                     |       |     |     |        |          |

E9JSA8|E9JSA8\_ARAHY [back to list](#)

| [Protein Coverage](#) | [Supporting Peptides](#) |

Protein Coverage:

1 MALRLNPNPS QKLFLSPSSS SSSSSSFSL PQMASLRSPR FRMASTLRTG SKEVENLKKP FTTPREHVHVQ VTHSMPPQKI

81 EIFKSLEGWA EENILTLLKP VEKCWQPQDY LPEPSEDFEE EQVRELRAK KELRDDYFVVL LVGDMITEEA LPTYQTMNLNTL

161 LDGVREDETGA SLTSWAVWTR AWTAEENRHG DLLNKYLKLS GRVDLRQIEK TIQYLIGSGM DPRTEENSPYL GFIYTSFQER

241 ATFISHGNTA RLAKEHGDMK LAQICGMIAS DEKRHETAYT KIVEKLFEID PDGTVMFAFAD MMRKKIAMPAN HLMYDGRDDN

321 LFENYSAVAQ **RIGVYTAKDY ADILEFLVGR** WKVADLTGLS GEGRKAQDYV CGLPPRIIRL EERAQGRAKE SPRLKFSWIY

401 DREVQL

Supporting Peptides:

| Peptide                 | Uniq | -10lgP | Mass      | Length | ppm | m/z       | z | RT    | Fraction | Scan     | Source File        | Area Raw in gel | #Feature | #Feature Raw in gel | Start | End | PTM | AScore | Found By |
|-------------------------|------|--------|-----------|--------|-----|-----------|---|-------|----------|----------|--------------------|-----------------|----------|---------------------|-------|-----|-----|--------|----------|
| R.IGVYTAKDYADILEFLVGR.W | Y    | 44.46  | 2142.1360 | 19     | 1.5 | 1072.0769 | 2 | 39.60 | 10       | F10:2024 | OB5937 H3A raw.raw | 3.8207E4        | 1        | 1                   | 332   | 350 |     |        | PEAKS DB |
| total 1 peptides        |      |        |           |        |     |           |   |       |          |          |                    |                 |          |                     |       |     |     |        |          |

B6ECZ0|B6ECZ0\_ARAHY [back to list](#)

| [Protein Coverage](#) | [Supporting Peptides](#) |

Protein Coverage:

1 MALRLNPNS QKLFLSPSS SSSSSSFSL PQMASLRSPR FRMASTLRTG SKEVENLKKP FTFPREVHVQ VTHSMPPQKI  
81 EIFKSLEGWA EENILTLLKP VGKCWQPQDY LPEPSEDGFE EQVRELRARA KELPDDYFVV LVGDMITEEA LPTYQTMLNT  
161 LDGVRDETGA SLTSWAVWTR AWTAEENRHG DLLNKYLYLS GRVDLRQIEK TIQYLIGSGM DPRTENSPYL GFIYTSFQER  
241 ATFISHGNTA RLAKEHGDMK LAQICGMIA S DEKRHETAYT KIVEKLFEID PDGTVMAFAD MMRKKIAMPA HLMYDGRDDN  
321 LFENYSAVAQ RIGVYTAKDY ADILEFLVGR WKVADLTGLS GEGRKAQDYV CGLPPRIRRL EERAQGRAKE SPRLKFSWIY  
401 DREVQL

Supporting Peptides:

| Peptide                 | Uniq | -10lgP | Mass      | Length | ppm | m/z       | z | RT    | Fraction | Scan     | Source File        | Area Raw in gel | #Feature | #Feature Raw in gel | Start | End | PTM | AScore | Found By |
|-------------------------|------|--------|-----------|--------|-----|-----------|---|-------|----------|----------|--------------------|-----------------|----------|---------------------|-------|-----|-----|--------|----------|
| R.IGVYTAKDYADILEFLVGR.W | Y    | 44.46  | 2142.1360 | 19     | 1.5 | 1072.0769 | 2 | 39.60 | 10       | F10:2024 | OB5937 H3A raw.raw | 3.8207E4        | 1        | 1                   | 332   | 350 |     |        | PEAKS DB |
| total 1 peptides        |      |        |           |        |     |           |   |       |          |          |                    |                 |          |                     |       |     |     |        |          |

U3MF97|U3MF97\_ARAHYback to list

| Protein Coverage | Supporting Peptides |

Protein Coverage:

1 MGKTRGMGAA RKLKSHRRRQ RWADKSYKKS HLGNEWKKPF AGSSHAKGIV LEKIGIEAKQ PNSAIRKCAR VQLIKNGKKI Carbamidomethylation (+57.02)  
81 AAFVPNDGCL NYIEENDEVL IAGFGRKGHA VGDIPGVRFK VVKVSGVSLL ALFKEKKEKP RS

Supporting Peptides:

| Peptide                                | Uniq | -10lgP | Mass      | Length | ppm | m/z       | z | RT    | Fraction | Scan    | Source File       | Area Raw in gel | #Feature | #Feature Raw in gel | Start | End | PTM                  | AScore                           | Found By |
|----------------------------------------|------|--------|-----------|--------|-----|-----------|---|-------|----------|---------|-------------------|-----------------|----------|---------------------|-------|-----|----------------------|----------------------------------|----------|
| K.IAAFPNDGCG(+57.02)LNIEENDEVLIAGFGR.K | Y    | 33.42  | 2995.4385 | 27     | 3.9 | 1498.7323 | 2 | 38.71 | 5        | F5:1942 | OB5932 H2 raw.raw | 0               | 0        | 0                   | 80    | 106 | Carbamidomethylation | C10:Carbamidomethylation:1000.00 | PEAKS DB |
| total 1 peptides                       |      |        |           |        |     |           |   |       |          |         |                   |                 |          |                     |       |     |                      |                                  |          |

Peptide List

## Summary

# 1. Notes

PEKAS PTM 37  
ROASTED peanut extract files.  
All roasted allergend bands fomr 1D SDS PAGE

# 2. Result Statistics

**Figure 1.** False discovery rate (FDR) curve. X axis is the number of peptides being kept. Y axis is the corresponding FDR. [?](#)

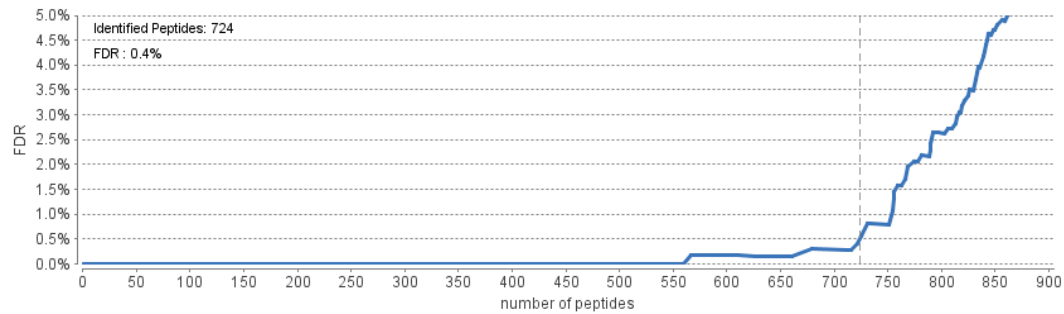

**Figure 2.** PSM score distribution. (a) Distribution of PEAKS peptide score; (b) Scatterplot of PEAKS peptide score versus precursor mass error. [?](#)

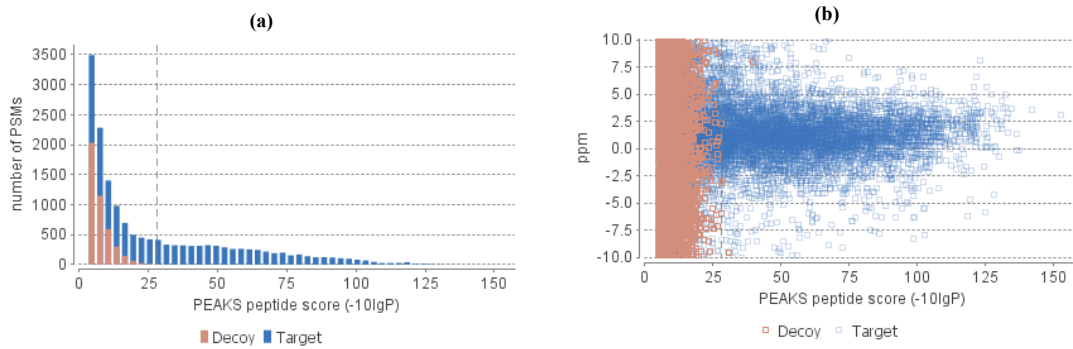

**Table 1.** Statistics of data.

|                | #Scans |       |          | #Features | Identified |        |             | #Peptides | #Sequences | #Proteins* |     |     |
|----------------|--------|-------|----------|-----------|------------|--------|-------------|-----------|------------|------------|-----|-----|
|                | MS1    | MS/MS | #Chimera |           | #PSMs      | #Scans | #Features** |           |            | Groups     | All | Top |
| Total          | 34006  | 24894 | 3326     | 39890     | 6083       | 5965   | 2378        | 724       | 367        | 34         | 52  | 46  |
| Roasted in gel | 34006  | 24894 | 3326     | 39890     | 6083       | 5965   | 2378        | 724       | 367        | 34         | 52  | 46  |

\* proteins with significant peptides are used in counts.



\*\* features are identified by DB search only.

**Figure 3.** Sample overlap for Proteins and Peptides (up to 8 samples). (a) All Proteins; (b) Top Proteins; (c) Peptides; [?](#)

(a) Not applicable to only one sample      (b) Not applicable to only one sample      (c) Not applicable to only one sample

**Figure 4.** Distribution of peptide feature detection. (a) Feature m/z distribution; (b) Feature RT distribution.

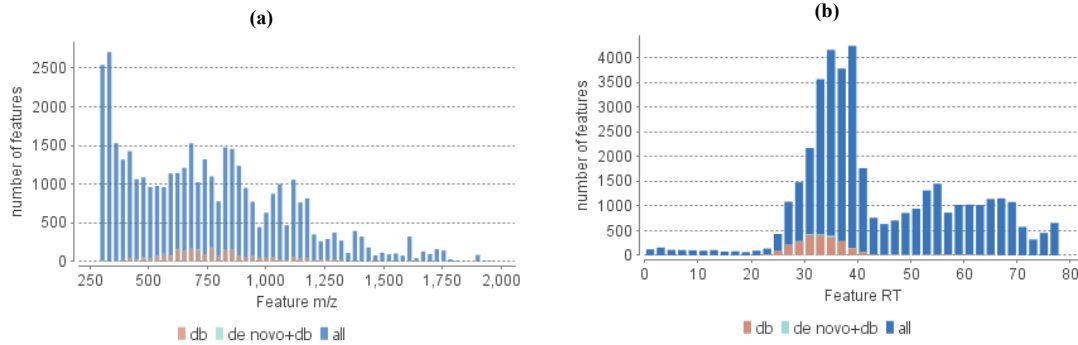

**Figure 5.** Distribution of identified peptide features. (a) Feature abundance distribution; (b) *De novo* sequencing validation. [?](#)

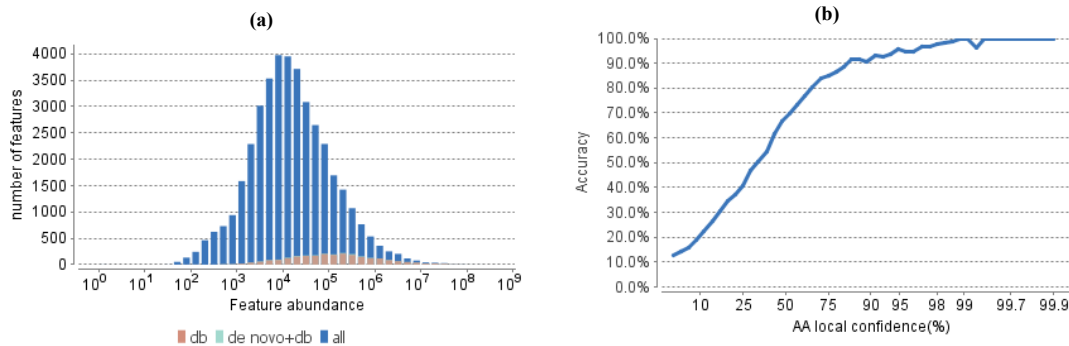

**Table 2.** Result filtration parameters.

|                             |       |
|-----------------------------|-------|
| Peptide -10lgP              | ≥28.3 |
| PTM Ascore                  | ≥20   |
| Protein -10lgP              | ≥20   |
| Proteins unique peptides ≥1 |       |
| De novo score(%)            | ≥50%  |

**Table 3.** Statistics of filtered result.

|                                |      |
|--------------------------------|------|
| FDR (Peptide-Spectrum Matches) | 0.0% |
| FDR (Peptide Sequences)        | 0.4% |
| FDR (Protein Group)            | 2.9% |
| De Novo Only Spectra           | 185  |

**Table 4.** PTM profile.

| Name                | ΔMass  | Position    | #PSM | -10lgP | Abundance | AScore  |
|---------------------|--------|-------------|------|--------|-----------|---------|
| Carbamidomethyl     | 57.02  | C           | 863  | 136.41 | 3.83E6    | 1000.00 |
| Oxidation           | 15.99  | M           | 367  | 128.16 | 1.94E6    | 27.96   |
| Deamidation         | .98    | NQ          | 246  | 152.35 | 9.54E5    | 180.29  |
| Carbamidomethyl     | 57.02  | DEHK,N-term | 185  | 113.97 | 4.74E5    | 0.00    |
| Oxidation           | 15.99  | DKNPRY      | 43   | 62.00  | 3.32E5    | 55.92   |
| Methylation(others) | 14.02  | DEHST       | 33   | 79.80  | 5.81E5    | 18.00   |
| Pyro-glu from Q     | -17.03 | N-term      | 33   | 75.52  | 4.88E3    | 1000.00 |
| Oxidation           | 15.99  | HW          | 32   | 90.73  | 5.4E5     | 1000.00 |

|                   |        |          |    |        |        |         |
|-------------------|--------|----------|----|--------|--------|---------|
| Propionamide      | 71.04  | C        | 29 | 73.23  | 1.33E4 | 11.06   |
| Dehydration       | -18.01 | DSTY     | 26 | 67.70  | 1.91E5 | 40.00   |
| Methylation(KR)   | 14.02  | KR       | 21 | 103.68 | 3.31E6 | 1000.00 |
| Dimethylation(KR) | 28.03  | KR       | 19 | 116.09 | 3.06E6 | 1000.00 |
| Ethyl             | 28.03  | D,N-term | 15 | 66.95  | 8.8E5  | 42.22   |
| Cation:Fe[II]     | 53.92  | DE       | 14 | 48.78  | 2.33E5 | 154.98  |
| Ammonia loss      | -17.03 | N        | 14 | 91.80  | 5.36E5 | 1000.00 |
| Dethiomethyl      | -48.00 | M        | 12 | 88.05  | 1.37E6 | 14.02   |
| Dihydroxy         | 31.99  | FPRW     | 12 | 89.05  | 7.44E4 | 44.28   |
| Sodium            | 21.98  | DE       | 11 | 54.92  | 4.36E4 | 8.58    |
| Formylation       | 27.99  | N-term   | 10 | 84.60  | 7.41E5 | 98.75   |
| SMA               | 127.06 | N-term   | 9  | 50.76  | 8.68E5 | 1000.00 |
| Pyro-glu from E   | -18.01 | N-term   | 7  | 58.23  | 7.73E4 | 1000.00 |
| Amidine           | 41.03  | K,N-term | 7  | 48.20  | 1.55E4 | 96.48   |

3. Experiment Control

Figure 6. Precursor mass error of peptide-spectrum matches (PSM) in filtered result. (a) Distribution of precursor mass error in ppm; (b) Scatterplot of precursor m/z versus precursor mass error in ppm.

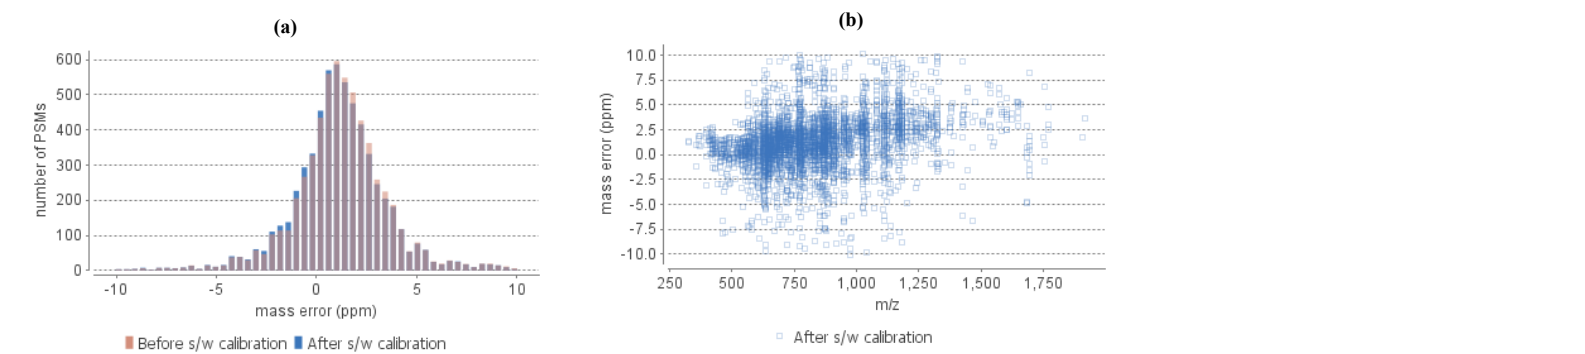

Table 5. Number of identified peptides in each sample by the number of missed cleavages.

|                  |     |     |    |   |    |
|------------------|-----|-----|----|---|----|
| Missed Cleavages | 0   | 1   | 2  | 3 | 4+ |
| Roasted in gel   | 385 | 268 | 71 | 0 | 0  |

4. Other Information

|                                                                                                                    |                                                                                                                                                                            |
|--------------------------------------------------------------------------------------------------------------------|----------------------------------------------------------------------------------------------------------------------------------------------------------------------------|
| <b>Table 6.</b> Search parameters.<br>PEAKS Version: PEAKS Studio 10.6 build 20201015<br>Search Engine Name: PEAKS | <b>Table 7.</b> Instrument parameters.<br>Fractions: OB5922 H2 Ro.raw, OB5926 H3B Ro.raw, OB5942 H6 Ro.ra<br>w, OB5943 H6 Ro.raw, OB5944 H6 Ro.raw, OB5945 H2 Ro.raw, OB59 |
|--------------------------------------------------------------------------------------------------------------------|----------------------------------------------------------------------------------------------------------------------------------------------------------------------------|

Parent Mass Error Tolerance: 10.0 ppm  
Fragment Mass Error Tolerance: 0.5 Da  
Precursor Mass Search Type: monoisotopic  
Enzyme: Trypsin  
Max Missed Cleavages: 2  
Digest Mode: Unspecific  
Fixed Modifications:  
    Carbamidomethylation: 57.02  
Variable Modifications:  
    Oxidation (M): 15.99  
    Deamidation (NQ): 0.98  
    Acetylation (K): 42.01  
    Acetylation (Protein N-term): 42.01  
    Acetylation (N-term): 42.01  
    Amidation: -0.98  
    Beta-methylthiolation: 45.99  
    Biotinylation: 226.08  
    and 303 more...  
Max Variable PTM Per Peptide: 3  
Database: Uniprot\_Peanut-3818\_Jul18  
Taxon: All  
Contaminant Database: contam MQ  
Searched Entry: 1723  
FDR Estimation: Enabled  
De novo score(%) threshold: 15  
Peptide hit threshold (-10logP): 30.0  
Peaks run ID: 34  
Merge Options: no merge  
Precursor Options: corrected  
Charge Options: no correction  
Filter m/z: 200.0 - 2000.0  
Filter Charge: 2 - 8  
Process: true  
Associate chimera: yes

46 H2 Ro.raw, OB5948 H3B Ro.raw, OB5949 H3B Ro.raw, OB5951 H3  
A Ro.raw, OB5952 H3A Ro.raw, OB5953 H3A Ro.raw, OB5954 H1 Ro.  
raw, OB5955 H1 Ro.raw, OB5956 H1 Ro.raw  
Ion Source: ESI(nano-spray)  
Fragmentation Mode: CID, CAD(y and b ions)  
MS Scan Mode: FT-ICR/Orbitrap  
MS/MS Scan Mode: FT-ICR/Orbitrap

Protein List

Protein Accession Contains:  
Protein Description Contains:  
Protein Sample Area >=  
Protein PTM Contains:

| Protein Group     | Protein ID | Accession             | -10lgP | Coverage (%) | Coverage (%) Roasted in gel | Area Roasted in gel | #Peptides | #Unique | #Spec Roasted in gel | PTM | Avg. Mass | Description                                                                              |
|-------------------|------------|-----------------------|--------|--------------|-----------------------------|---------------------|-----------|---------|----------------------|-----|-----------|------------------------------------------------------------------------------------------|
| 2                 | 7          | sp P43237 ALL11_ARAHY | 565.06 | 63           | 63                          | 1.0131E8            | 94        | 9       | 3063                 | Y   | 70283     | Allergen Ara h 1, clone P17 OS=Arachis hypogaea OX=3818 PE=1 SV=1                        |
| 2                 | 6          | B3IXL2 B3IXL2_ARAHY   | 565.06 | 63           | 63                          | 1.0131E8            | 94        | 9       | 3063                 | Y   | 70283     | Main allergen Ara h1 OS=Arachis hypogaea OX=3818 PE=2 SV=1                               |
| 2                 | 5          | Q6PSU3 Q6PSU3_ARAHY   | 565.06 | 67           | 67                          | 1.0131E8            | 94        | 9       | 3063                 | Y   | 66575     | Conarachin (Fragment) OS=Arachis hypogaea OX=3818 PE=4 SV=1                              |
| 1                 | 3          | N1NG13 N1NG13_ARAHY   | 560.56 | 62           | 62                          | 2.424E7             | 91        | 8       | 3078                 | Y   | 71345     | Seed storage protein Ara h1 OS=Arachis hypogaea OX=3818 GN=ARAX_AHF4 17E07-017 PE=4 SV=1 |
| 1                 | 2          | sp P43238 ALL12_ARAHY | 560.56 | 62           | 62                          | 2.424E7             | 91        | 8       | 3078                 | Y   | 71345     | Allergen Ara h 1, clone P41B OS=Arachis hypogaea OX=3818 PE=1 SV=1                       |
| 3                 | 8          | Q6PSU6 Q6PSU6_ARAHY   | 506.79 | 68           | 68                          | 2.2902E6            | 55        | 1       | 1557                 | Y   | 34133     | Conarachin (Fragment) OS=Arachis hypogaea OX=3818 PE=2 SV=1                              |
| 4                 | 4          | E5G076 E5G076_ARAHY   | 496.65 | 50           | 50                          | 3.5399E6            | 60        | 1       | 1468                 | Y   | 70788     | Ara h 1 allergen OS=Arachis hypogaea OX=3818 GN=ara h 1 PE=4 SV=1                        |
| 5                 | 11         | A1DZF0 A1DZF0_ARAHY   | 471.62 | 75           | 75                          | 1.2702E7            | 44        | 9       | 891                  | Y   | 60375     | Arachin 6 OS=Arachis hypogaea OX=3818 PE=2 SV=1                                          |
| 7                 | 9          | Q647H3 Q647H3_ARAHY   | 466.93 | 68           | 68                          | 6.9954E7            | 41        | 5       | 803                  | Y   | 61532     | Arachin Ahy-2 OS=Arachis hypogaea OX=3818 PE=2 SV=1                                      |
| 9                 | 13         | Q9FZ11 Q9FZ11_ARAHY   | 462.45 | 61           | 61                          | 3.0114E6            | 38        | 4       | 743                  | Y   | 60449     | Gly1 OS=Arachis hypogaea OX=3818 GN=Gly1 PE=2 SV=1                                       |
| 8                 | 10         | B5TYU1 B5TYU1_ARAHY   | 456.31 | 73           | 73                          | 2.0154E7            | 40        | 1       | 787                  | Y   | 60624     | Arachin Arah3 isoform OS=Arachis hypogaea OX=3818 PE=1 SV=1                              |
| 10                | 18         | Q5I6T2 Q5I6T2_ARAHY   | 453.29 | 55           | 55                          | 0                   | 36        | 1       | 723                  | Y   | 60736     | Arachin Ahy-4 OS=Arachis hypogaea OX=3818 PE=2 SV=1                                      |
| 13                | 19         | Q6IWG5 Q6IWG5_ARAHY   | 432.31 | 59           | 59                          | 1.7408E8            | 27        | 24      | 367                  | Y   | 58061     | Glycinin (Fragment) OS=Arachis hypogaea OX=3818 PE=2 SV=1                                |
| 13                | 20         | Q0GM57 Q0GM57_ARAHY   | 432.31 | 59           | 59                          | 1.7408E8            | 27        | 24      | 367                  | Y   | 58263     | Iso-Ara h3 OS=Arachis hypogaea OX=3818 PE=2 SV=1                                         |
| total 46 proteins |            |                       |        |              |                             |                     |           |         |                      |     |           |                                                                                          |

| Protein Group     | Protein ID | Accession                                   | -10lgP | Coverage (%) | Coverage (%) Roasted in gel | Area Roasted in gel | #Peptides | #Unique | #Spec Roasted in gel | PTM | Avg. Mass | Description                                                                                           |
|-------------------|------------|---------------------------------------------|--------|--------------|-----------------------------|---------------------|-----------|---------|----------------------|-----|-----------|-------------------------------------------------------------------------------------------------------|
| 14                | 29         | <a href="#">Q82580 Q82580_ARAHY</a>         | 388.18 | 37           | 37                          | 3.3176E6            | 23        | 1       | 366                  | Y   | 58350     | Glycinin (Fragment) OS=Arachis hypogaea OX=3818 GN=Arah3 PE=2 SV=1                                    |
| 15                | 25         | <a href="#">E9LFE8 E9LFE8_ARAHY</a>         | 379.35 | 82           | 82                          | 2.5488E7            | 20        | 17      | 142                  | Y   | 28290     | 11S arachin (Fragment) OS=Arachis hypogaea OX=3818 PE=2 SV=1                                          |
| 18                | 28         | <a href="#">sp Q647H2 AHY3_ARAHY</a>        | 337.21 | 38           | 38                          | 9.6448E6            | 16        | 13      | 101                  | Y   | 54569     | Arachin Ahy-3 OS=Arachis hypogaea OX=3818 PE=1 SV=1                                                   |
| 17                | 26         | <a href="#">Q38711 Q38711_ARAHY</a>         | 334.78 | 85           | 85                          | 3.3979E5            | 15        | 2       | 121                  | Y   | 29134     | Galactose-binding lectin (Fragment) OS=Arachis hypogaea OX=3818 GN=lec P E=2 SV=1                     |
| 21                | 27         | <a href="#">A0A089ZXL7 A0A089ZXL7_ARAHY</a> | 316.72 | 77           | 77                          | 2.7476E5            | 13        | 2       | 87                   | Y   | 29407     | Peanut agglutinin variant OS=Arachis hypogaea OX=3818 PE=2 SV=1                                       |
| 20                | 30         | <a href="#">A1E2B0 A1E2B0_ARAHY</a>         | 302.05 | 69           | 69                          | 1.2983E7            | 13        | 10      | 91                   | Y   | 33520     | 11S seed storage globulin B1 OS=Arachis hypogaea OX=3818 PE=2 SV=1                                    |
| 23                | 40         | <a href="#">Q647H1 Q647H1_ARAHY</a>         | 289.94 | 19           | 19                          | 2.9236E6            | 10        | 10      | 52                   | Y   | 75933     | Conarachin OS=Arachis hypogaea OX=3818 PE=2 SV=1                                                      |
| 12                | 36         | <a href="#">ASZ1R0 ASZ1R0_ARAHY</a>         | 289.17 | 70           | 70                          | 3.5713E7            | 14        | 14      | 374                  | Y   | 16920     | Ara h 6 allergen OS=Arachis hypogaea OX=3818 GN=Ara h 6 PE=4 SV=1                                     |
| 12                | 35         | <a href="#">sp Q647G9 CONG_ARAHY</a>        | 289.17 | 70           | 70                          | 3.5713E7            | 14        | 14      | 374                  | Y   | 16920     | Conglutin OS=Arachis hypogaea OX=3818 PE=1 SV=1                                                       |
| 25                | 33         | <a href="#">A1E2B1 A1E2B1_ARAHY</a>         | 232.07 | 58           | 58                          | 1.7932E6            | 8         | 8       | 22                   | Y   | 31268     | 11S seed storage globulin B2 OS=Arachis hypogaea OX=3818 PE=2 SV=1                                    |
| 19                | 44         | <a href="#">sp Q6PSU2 CONG7_ARAHY</a>       | 194.74 | 46           | 46                          | 5.2434E6            | 6         | 6       | 95                   | Y   | 20114     | Conglutin-7 OS=Arachis hypogaea OX=3818 PE=1 SV=2                                                     |
| 24                | 47         | <a href="#">E9LFE9 E9LFE9_ARAHY</a>         | 185.42 | 26           | 26                          | 2.496E6             | 4         | 4       | 24                   | Y   | 28300     | 11S arachin OS=Arachis hypogaea OX=3818 PE=2 SV=1                                                     |
| 42                | 32         | <a href="#">A0A0A6ZDP1 A0A0A6ZDP1_ARAHY</a> | 128.27 | 11           | 11                          | 1.1161E4            | 1         | 1       | 1                    | N   | 20101     | Glyceraldehyde-3-phosphate dehydrogenase C2 OS=Arachis hypogaea OX=3818 PE=2 SV=1                     |
| 28                | 62         | <a href="#">E5FHZ1 E5FHZ1_ARAHY</a>         | 127.84 | 27           | 27                          | 9.4991E5            | 2         | 2       | 8                    | N   | 22636     | Late embryogenesis abundant protein group 5 protein OS=Arachis hypogaea OX=3818 GN=LEA5-1 PE=2 SV=1   |
| 28                | 54         | <a href="#">N1NKG9 N1NKG9_ARAHY</a>         | 127.84 | 23           | 23                          | 9.4991E5            | 2         | 2       | 8                    | N   | 26041     | Seed maturation protein OS=Arachis hypogaea OX=3818 GN=ARAX_AHF417E 07-003 PE=4 SV=1                  |
| 32                | 2088       | <a href="#">E5FHY1 E5FHY1_ARAHY</a>         | 102.90 | 49           | 49                          | 0                   | 3         | 1       | 4                    | N   | 10140     | Late embryogenesis abundant protein group 1 protein OS=Arachis hypogaea OX=3818 GN=LEA1-2 PE=2 SV=1   |
| 30                | 1390       | <a href="#">E5FHY2 E5FHY2_ARAHY</a>         | 102.36 | 47           | 47                          | 1.1991E4            | 3         | 1       | 6                    | N   | 10652     | Late embryogenesis abundant protein group 1 protein OS=Arachis hypogaea OX=3818 GN=LEA1-3 PE=2 SV=1   |
| 37                | 61         | <a href="#">Q42515 Q42515_ARAHY</a>         | 84.76  | 14           | 14                          | 2.7447E4            | 2         | 2       | 2                    | N   | 28924     | Chitinase (Class II) OS=Arachis hypogaea OX=3818 GN=chi2;2 PE=2 SV=1                                  |
| 34                | 133        | <a href="#">B4UWB2 B4UWB2_ARAHY</a>         | 83.50  | 4            | 4                           | 3.6559E4            | 1         | 1       | 3                    | N   | 21637     | Kunitz trypsin inhibitor 4 OS=Arachis hypogaea OX=3818 PE=2 SV=1                                      |
| 35                | 173        | <a href="#">A7LIS5 A7LIS5_ARAHY</a>         | 75.04  | 10           | 10                          | 5.6415E3            | 1         | 1       | 2                    | N   | 23461     | Oxalate oxidase OS=Arachis hypogaea OX=3818 GN=OxOxs PE=2 SV=1                                        |
| 35                | 161        | <a href="#">D4NXQ0 D4NXQ0_ARAHY</a>         | 75.04  | 10           | 10                          | 5.6415E3            | 1         | 1       | 2                    | N   | 23448     | Germin-like protein subfamily 3 member 3 OS=Arachis hypogaea OX=3818 GN=GLP1 PE=2 SV=1                |
| 44                | 63         | <a href="#">H6U596 H6U596_ARAHY</a>         | 54.03  | 8            | 8                           | 6.1243E3            | 1         | 1       | 1                    | N   | 19370     | Alcohol dehydrogenase (Fragment) OS=Arachis hypogaea OX=3818 PE=2 SV=1                                |
| 47                | 436        | <a href="#">A0A191UJ92 A0A191UJ92_ARAHY</a> | 38.97  | 8            | 8                           | 6.2701E3            | 1         | 1       | 1                    | N   | 14064     | 50S ribosomal protein L20, chloroplastic OS=Arachis hypogaea OX=3818 GN=rpl20 PE=3 SV=1               |
| 45                | 74         | <a href="#">E5FHZ2 E5FHZ2_ARAHY</a>         | 38.10  | 8            | 8                           | 5.6109E3            | 1         | 1       | 1                    | N   | 27370     | Late embryogenesis abundant protein group 5 protein OS=Arachis hypogaea OX=3818 GN=LEA5-2 PE=2 SV=1   |
| 52                | 444        | <a href="#">A0A075M4V7 A0A075M4V7_ARAHY</a> | 33.37  | 5            | 5                           | 2.6266E4            | 1         | 1       | 1                    | N   | 16964     | Ribulose biphosphate carboxylase small chain (Fragment) OS=Arachis hypogaea OX=3818 GN=rbcS PE=3 SV=1 |
| 52                | 443        | <a href="#">A0A075M514 A0A075M514_ARAHY</a> | 33.37  | 5            | 5                           | 2.6266E4            | 1         | 1       | 1                    | N   | 16934     | Ribulose biphosphate carboxylase small chain (Fragment) OS=Arachis hypogaea OX=3818 GN=rbcS PE=3 SV=2 |
| 52                | 446        | <a href="#">A0A075M9B7 A0A075M9B7_ARAHY</a> | 33.37  | 5            | 5                           | 2.6266E4            | 1         | 1       | 1                    | N   | 18164     | Ribulose biphosphate carboxylase small chain (Fragment) OS=Arachis hypogaea OX=3818 GN=rbcS PE=3 SV=1 |
| 52                | 445        | <a href="#">A0A075M3Q0 A0A075M3Q0_ARAHY</a> | 33.37  | 5            | 5                           | 2.6266E4            | 1         | 1       | 1                    | N   | 18164     | Ribulose biphosphate carboxylase small chain (Fragment) OS=Arachis hypogaea OX=3818 GN=rbcS PE=3 SV=1 |
| 52                | 466        | <a href="#">A0A075M506 A0A075M506_ARAHY</a> | 33.37  | 5            | 5                           | 2.6266E4            | 1         | 1       | 1                    | N   | 18123     | Ribulose biphosphate carboxylase small chain (Fragment) OS=Arachis hypogaea OX=3818 GN=rbcS PE=3 SV=1 |
| 52                | 414        | <a href="#">T2BAU5 T2BAU5_ARAHY</a>         | 33.37  | 4            | 4                           | 2.6266E4            | 1         | 1       | 1                    | N   | 20437     | Ribulose biphosphate carboxylase small chain OS=Arachis hypogaea OX=3818 PE=2 SV=1                    |
| 51                | 440        | <a href="#">V5T718 V5T718_ARAHY</a>         | 32.27  | 5            | 5                           | 1.384E4             | 1         | 1       | 1                    | N   | 35071     | Putative MYB-related protein 27 OS=Arachis hypogaea OX=3818 GN=MYB27 PE=4 SV=1                        |
| 53                | 192        | <a href="#">V5T7W3 V5T7W3_ARAHY</a>         | 30.31  | 4            | 4                           | 1.5963E4            | 1         | 1       | 1                    | N   | 27579     | Putative R2R3 MYB protein 3 OS=Arachis hypogaea OX=3818 GN=MYB3 PE=4 SV=1                             |
| total 46 proteins |            |                                             |        |              |                             |                     |           |         |                      |     |           |                                                                                                       |

[sp|P43237|ALL11\\_ARAHY](#)[back to list](#)[| Protein Coverage](#) | [Supporting Peptides](#) |

Protein Coverage:

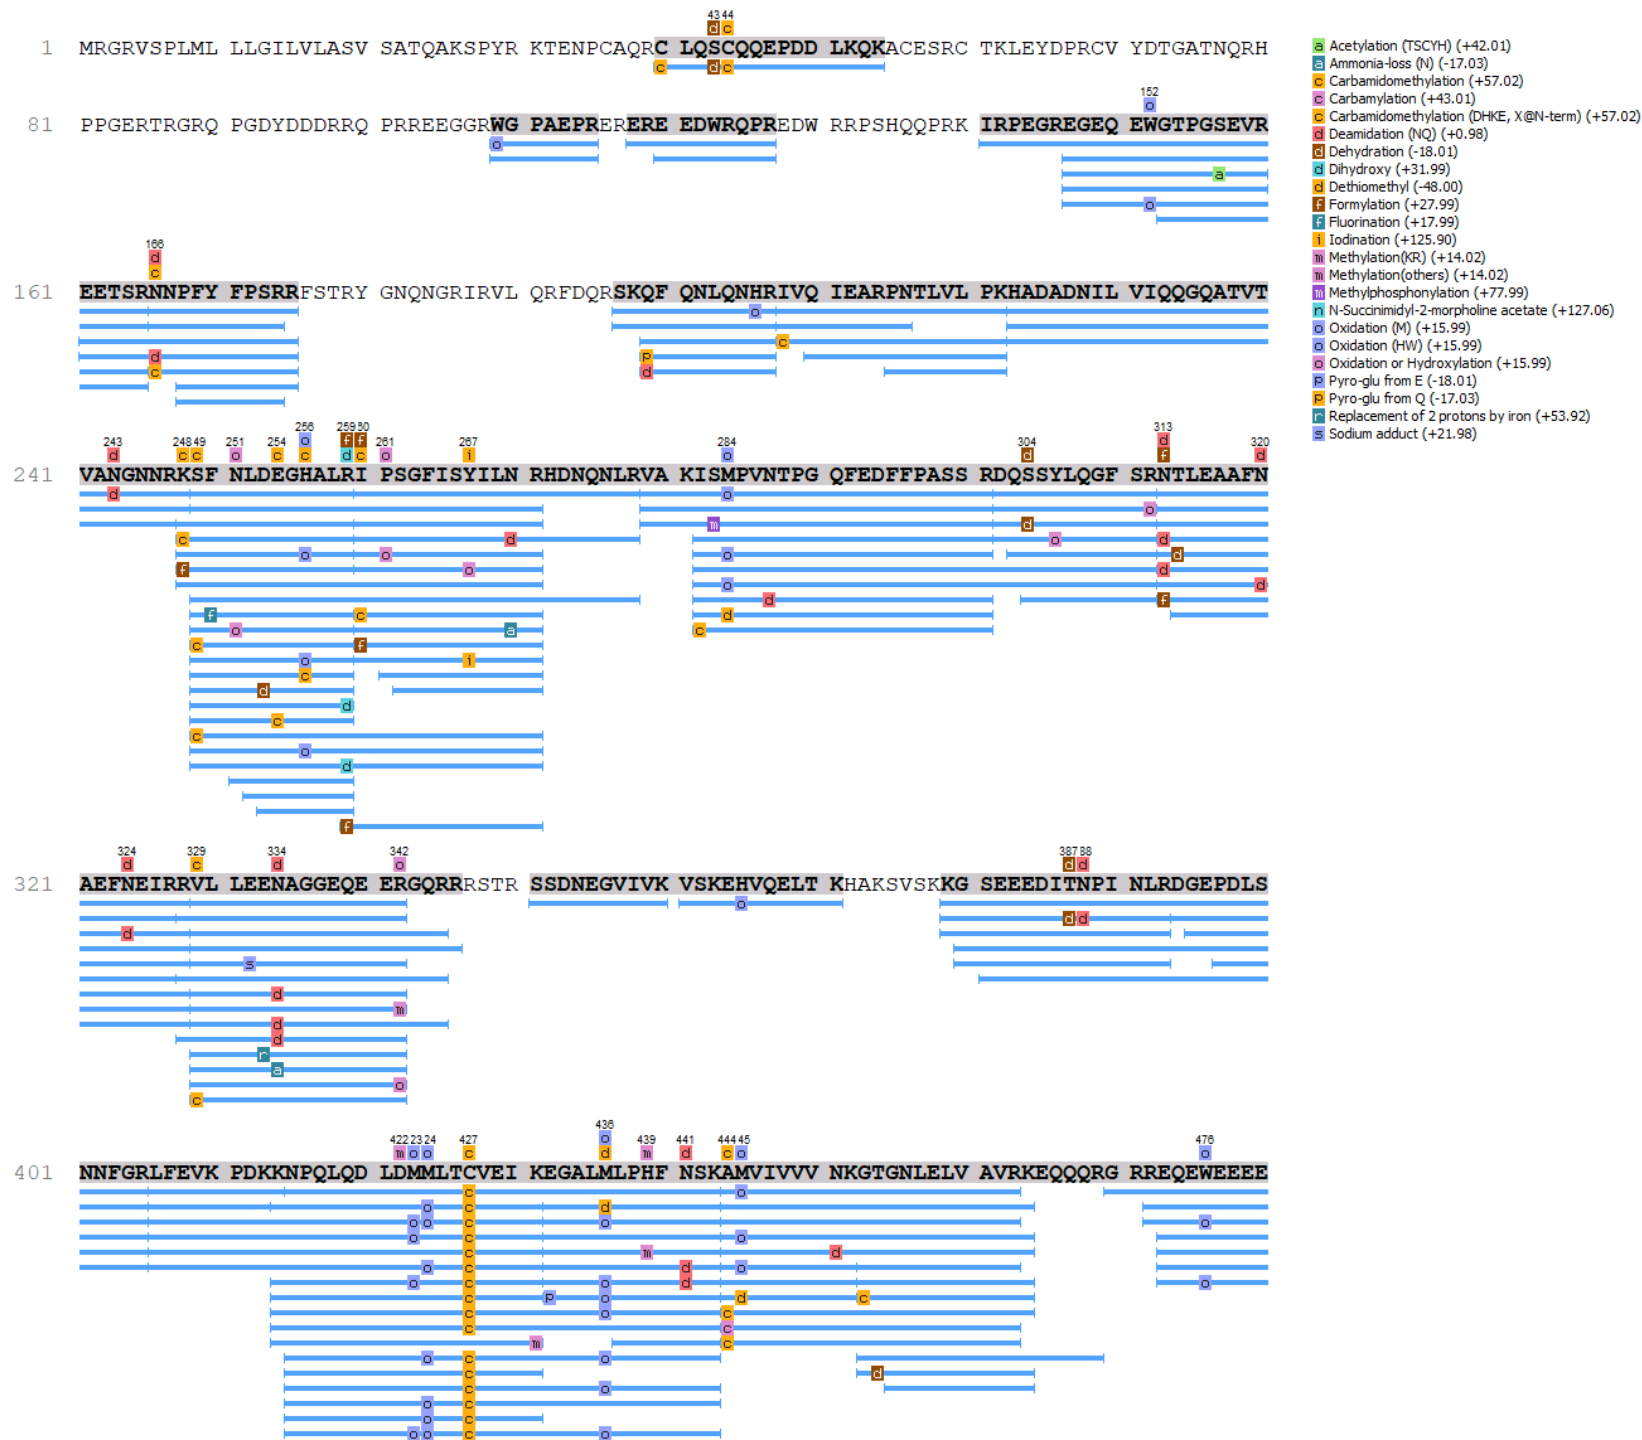

## Supporting Peptides:

| Peptide                                       | Uniq | -10lgP | Mass      | Length | ppm  | m/z       | z | RT    | Fraction | Scan     | Source File       | Area Roasted in gel | #Feature | #Feature Roasted in gel | Start | End | PTM                                 | AScore                                                                                       | Found By |
|-----------------------------------------------|------|--------|-----------|--------|------|-----------|---|-------|----------|----------|-------------------|---------------------|----------|-------------------------|-------|-----|-------------------------------------|----------------------------------------------------------------------------------------------|----------|
| K.KNPQLQLDMLMTC(+57.02)VEIK.E                 | N    | 136.41 | 2175.0737 | 18     | 1.4  | 1088.5457 | 2 | 35.26 | 43       | F43:1808 | OB5956 H1 Ro.raw  | 1.4906E7            | 6        | 6                       | 414   | 431 | Carbamidomethylation                | C14:Carb amidomet hylation:1 000.00                                                          | PEAKS DB |
| R.NTLEAFAFNAEFNEIR.R                          | N    | 130.93 | 1737.8322 | 15     | 1.8  | 869.9249  | 2 | 35.34 | 38       | F38:1714 | OB5951 H3A Ro.raw | 1.332E7             | 16       | 16                      | 313   | 327 |                                     |                                                                                              | PEAKS DB |
| K.GSEEEITNPINLRDGEPLSNFGR.L                   | N    | 129.76 | 2887.3220 | 26     | -0.7 | 963.4473  | 3 | 32.67 | 43       | F43:1660 | OB5956 H1 Ro.raw  | 1.2475E7            | 11       | 11                      | 380   | 405 |                                     |                                                                                              | PEAKS DB |
| K.NPQLQLDMLMTC(+57.02)VEIK.E                  | N    | 128.40 | 2046.9788 | 17     | 0.2  | 1024.4968 | 2 | 37.11 | 43       | F43:1936 | OB5956 H1 Ro.raw  | 3.4643E7            | 10       | 10                      | 415   | 431 | Carbamidomethylation                | C13:Carb amidomet hylation:1 000.00                                                          | PEAKS DB |
| K.NPQLQLDLM(+15.99)MLTC(+57.02)VEIK.E         | N    | 128.16 | 2062.9736 | 17     | -4.2 | 1032.4897 | 2 | 36.93 | 43       | F43:1892 | OB5956 H1 Ro.raw  | 3.3834E6            | 3        | 3                       | 415   | 431 | Oxidation (M); Carbamidomethylation | M9:Oxidat ion (M):3 0.46;C13: Carbami domethylat ion:1000. 00                                | PEAKS DB |
| K.NPQLQLDLM(+15.99)LTC(+57.02)VEIK.E          | N    | 127.13 | 2062.9736 | 17     | 5.0  | 1032.4993 | 2 | 34.71 | 43       | F43:1780 | OB5956 H1 Ro.raw  | 1.0665E7            | 4        | 4                       | 415   | 431 | Oxidation (M); Carbamidomethylation | M10:Oxid ation (M): 30.46;C1 3:Carbami domethyla tion:1000. 00                               | PEAKS DB |
| K.ISM(+15.99)PVNTPGQFEDFFPASSR.D              | N    | 127.11 | 2242.0364 | 20     | 0.1  | 1122.0284 | 2 | 34.52 | 30       | F30:1521 | OB5926 H3B Ro.raw | 2.1708E7            | 14       | 13                      | 282   | 301 | Oxidation (M)                       | M3:Oxidat ion (M):1 000.00                                                                   | PEAKS DB |
| R.EQEWEEEEEEEEEGSNR.E                         | N    | 125.55 | 2280.8413 | 18     | 3.9  | 1141.4324 | 2 | 28.35 | 43       | F43:1396 | OB5956 H1 Ro.raw  | 4.3429E6            | 7        | 7                       | 473   | 490 |                                     |                                                                                              | PEAKS DB |
| K.ISMPVNTPGQFEDFFPASSR.D                      | N    | 125.26 | 2226.0415 | 20     | 0.7  | 1114.0288 | 2 | 35.83 | 43       | F43:1868 | OB5956 H1 Ro.raw  | 8.8227E7            | 23       | 23                      | 282   | 301 |                                     |                                                                                              | PEAKS DB |
| K.HADADNIIQQGQATVTVAN(+.98)GNNRK.S            | N    | 123.10 | 2747.3950 | 26     | 3.3  | 916.8087  | 3 | 29.62 | 43       | F43:1472 | OB5956 H1 Ro.raw  | 4.4266E6            | 11       | 11                      | 223   | 248 | Deamidation (NQ)                    | N21:Dea midation (NQ):31.9 1                                                                 | PEAKS DB |
| K.NPQLQLDLM(+15.99)M(+15.99)LTC(+57.02)VEIK.E | N    | 121.59 | 2078.9688 | 17     | 6.6  | 1040.4985 | 2 | 33.82 | 43       | F43:1726 | OB5956 H1 Ro.raw  | 6.8984E4            | 2        | 2                       | 415   | 431 | Oxidation (M); Carbamidomethylation | M9:Oxidat ion (M):1 000.00;M 10:Oxidati on (M):10 00.00;C1 3:Carbami domethyla tion:1000. 00 | PEAKS DB |
| K.SFNLDEGHARIPSGFISYILNR.H                    | N    | 121.49 | 2618.3604 | 23     | 1.0  | 873.7949  | 3 | 37.51 | 41       | F41:1949 | OB5954 H1 Ro.raw  | 9.1637E7            | 28       | 28                      | 249   | 271 |                                     |                                                                                              | PEAKS DB |
| K.KNPQLQLDLM(+15.99)MLTC(+57.02)VEIK.E        | N    | 118.68 | 2191.0686 | 18     | 3.6  | 1096.5455 | 2 | 34.71 | 43       | F43:1781 | OB5956 H1 Ro.raw  | 1.3598E6            | 4        | 4                       | 414   | 431 | Oxidation (M); Carbamidomethylation | M10:Oxid ation (M): 27.96;C1 4:Carbami domethyla tion:1000. 00                               | PEAKS DB |
| K.AMVIVVVNKGTLNLELVAVR.K                      | N    | 114.87 | 2081.2031 | 20     | -1.0 | 1041.6078 | 2 | 34.35 | 43       | F43:1758 | OB5956 H1 Ro.raw  | 3.8361E7            | 13       | 13                      | 444   | 463 |                                     |                                                                                              | PEAKS DB |
| R.IFLAGDKDNVIDQIEK.Q                          | N    | 110.41 | 1816.9570 | 16     | -1.1 | 909.4848  | 2 | 32.67 | 43       | F43:1648 | OB5956 H1 Ro.raw  | 4.2419E8            | 56       | 55                      | 536   | 551 |                                     |                                                                                              | PEAKS DB |
| total 244 peptides                            |      |        |           |        |      |           |   |       |          |          |                   |                     |          |                         |       |     |                                     |                                                                                              |          |

| Peptide                                 | Uniq | -10lgP | Mass      | Length | ppm  | m/z       | z | RT    | Fraction | Scan     | Source File       | Area Roasted in gel | #Feature | #Feature Roasted in gel | Start | End | PTM                                   | AScore                                                   | Found By  |
|-----------------------------------------|------|--------|-----------|--------|------|-----------|---|-------|----------|----------|-------------------|---------------------|----------|-------------------------|-------|-----|---------------------------------------|----------------------------------------------------------|-----------|
| K.KNPQLQDLDMML(+15.99)LTC(+57.02)VEIK.E | N    | 110.35 | 2191.0686 | 18     | 3.5  | 1096.5454 | 2 | 32.98 | 42       | F42:1657 | OB5955 H1 Ro.raw  | 1.6495E6            | 4        | 4                       | 414   | 431 | Oxidation (M); Carbamidomethylation   | M11:Oxidation (M):23.10;C14:Carbamidomethylation:1000.00 | PEAKS DB  |
| K.KGSEEDITNPINLRDGEPLSNNFGR.L           | N    | 109.79 | 3015.4170 | 27     | 3.4  | 1006.1497 | 3 | 31.62 | 41       | F41:1565 | OB5954 H1 Ro.raw  | 1.1559E7            | 21       | 21                      | 379   | 405 |                                       |                                                          | PEAKS DB  |
| R.IPSGFSYILNR.H                         | N    | 109.18 | 1378.7609 | 12     | 2.5  | 690.3894  | 2 | 36.50 | 38       | F38:1780 | OB5951 H3A Ro.raw | 4.4166E8            | 20       | 20                      | 260   | 271 |                                       |                                                          | PEAKS DB  |
| K.HADADNILVIQQGQATVTVANGNNRK.S          | N    | 108.34 | 2746.4111 | 26     | 1.9  | 916.4794  | 3 | 29.61 | 43       | F43:1451 | OB5956 H1 Ro.raw  | 3.8404E6            | 5        | 5                       | 223   | 248 |                                       |                                                          | PEAKS DB  |
| R.VLLEENAGGEQEER.G                      | N    | 108.33 | 1571.7427 | 14     | 2.4  | 786.8805  | 2 | 26.83 | 42       | F42:1293 | OB5955 H1 Ro.raw  | 2.9858E7            | 10       | 10                      | 329   | 342 |                                       |                                                          | PEAKS DB  |
| R.KSFNLDEGHALR.I                        | N    | 108.28 | 1385.7051 | 12     | 0.6  | 462.9092  | 3 | 26.14 | 43       | F43:1252 | OB5956 H1 Ro.raw  | 5.3666E6            | 6        | 6                       | 248   | 259 |                                       |                                                          | PEAKS DB  |
| K.AMVVVVVKGTGNLELVAVRK.E                | N    | 107.96 | 2209.2981 | 21     | 1.1  | 737.4408  | 3 | 33.05 | 43       | F43:1682 | OB5956 H1 Ro.raw  | 1.2362E8            | 20       | 20                      | 444   | 464 |                                       |                                                          | PEAKS DB  |
| R.I(+57.02)PSGFSYILNR.H                 | N    | 107.77 | 1435.7823 | 12     | -3.6 | 718.8959  | 2 | 36.92 | 43       | F43:1901 | OB5956 H1 Ro.raw  | 1.7559E7            | 7        | 7                       | 260   | 271 | Carbamidomethylation (DHKE, X@N-term) | I1:Carbamidomethylation (DHKE, X@N-term):1000.00         | PEAKS PTM |
| K.KGSEEDITNPINLR.D                      | N    | 107.76 | 1713.8533 | 15     | 2.8  | 857.9363  | 2 | 29.07 | 43       | F43:1439 | OB5956 H1 Ro.raw  | 8.6032E6            | 7        | 7                       | 379   | 393 |                                       |                                                          | PEAKS DB  |
| R.I(+57.02)FLAGDKDNVIDQIEK.Q            | N    | 105.70 | 1873.9785 | 16     | 1.7  | 937.9982  | 2 | 32.48 | 43       | F43:1653 | OB5956 H1 Ro.raw  | 1.1722E7            | 5        | 5                       | 536   | 551 | Carbamidomethylation (DHKE, X@N-term) | I1:Carbamidomethylation (DHKE, X@N-term):90.91           | PEAKS PTM |
| R.DQSSYLQGFSR.N                         | N    | 105.08 | 1286.5891 | 11     | 0.8  | 644.3024  | 2 | 30.81 | 40       | F40:1431 | OB5953 H3A Ro.raw | 9.5783E7            | 31       | 31                      | 302   | 312 |                                       |                                                          | PEAKS DB  |
| R.V(+57.02)LLEENAGGEQEER.G              | N    | 103.80 | 1628.7642 | 14     | 0.3  | 815.3896  | 2 | 27.08 | 43       | F43:1322 | OB5956 H1 Ro.raw  | 4.0193E5            | 3        | 3                       | 329   | 342 | Carbamidomethylation (DHKE, X@N-term) | V1:Carbamidomethylation (DHKE, X@N-term):49.37           | PEAKS PTM |
| K.NPQLQDLDMMLTCEIK(+14.02).E            | N    | 103.68 | 2003.9730 | 17     | -1.2 | 1002.9926 | 2 | 38.20 | 43       | F43:1989 | OB5956 H1 Ro.raw  | 5.9168E6            | 4        | 4                       | 415   | 431 | Methylation(KR)                       | K17:Methylation(KR):1000.00                              | PEAKS PTM |
| K.SFNLDEGHALR.I                         | N    | 103.18 | 1257.6101 | 11     | -1.7 | 629.8113  | 2 | 28.00 | 43       | F43:1362 | OB5956 H1 Ro.raw  | 1.1584E8            | 33       | 31                      | 249   | 259 |                                       |                                                          | PEAKS DB  |
| K.AM(+15.99)VIVVVVVKGTGNLELVAVR.K       | N    | 103.14 | 2097.1980 | 20     | 1.6  | 700.0744  | 3 | 33.04 | 43       | F43:1684 | OB5956 H1 Ro.raw  | 2.3148E7            | 9        | 9                       | 444   | 463 | Oxidation (M)                         | M2:Oxidation (M):1000.00                                 | PEAKS DB  |
| R.DGEPLSNNFGR.L                         | N    | 102.69 | 1319.5742 | 12     | 0.3  | 660.7946  | 2 | 29.24 | 43       | F43:1495 | OB5956 H1 Ro.raw  | 7.4875E6            | 3        | 3                       | 394   | 405 |                                       |                                                          | PEAKS DB  |
| K.DLAFIGSGEQVEK.L                       | N    | 100.93 | 1375.6619 | 13     | -1.9 | 688.8369  | 2 | 30.34 | 43       | F43:1508 | OB5956 H1 Ro.raw  | 9.196E7             | 8        | 8                       | 555   | 567 |                                       |                                                          | PEAKS DB  |
| total 244 peptides                      |      |        |           |        |      |           |   |       |          |          |                   |                     |          |                         |       |     |                                       |                                                          |           |

| Peptide                                          | Uniq | -10lgP | Mass      | Length | ppm  | m/z       | z | RT    | Fraction | Scan     | Source File      | Area Roasted in gel | #Feature | #Feature Roasted in gel | Start | End | PTM                                   | AScore                                                  | Found By  |
|--------------------------------------------------|------|--------|-----------|--------|------|-----------|---|-------|----------|----------|------------------|---------------------|----------|-------------------------|-------|-----|---------------------------------------|---------------------------------------------------------|-----------|
| K.NPQLQLDLM(+15.99)MLTC(+57.02)VEIKEGALMLPHFSK.A | N    | 100.40 | 3387.6335 | 29     | -0.6 | 1130.2178 | 3 | 37.70 | 41       | F41:1939 | OB5954 H1 Ro.raw | 8.7706E7            | 6        | 6                       | 415   | 443 | Oxidation (M); Carbamidomethylation   | M9:Oxidation (M):26.02;C13:Carbamidomethylation:1000.00 | PEAKS DB  |
| R.RVLLEENAGGEQEER.G                              | N    | 100.35 | 1727.8438 | 15     | 0.2  | 576.9553  | 3 | 25.30 | 42       | F42:1185 | OB5955 H1 Ro.raw | 8.2964E5            | 6        | 6                       | 328   | 342 |                                       |                                                         | PEAKS DB  |
| R.EGEQEWGTPGSEVR.E                               | Y    | 100.27 | 1559.6852 | 14     | 0.8  | 780.8505  | 2 | 27.93 | 42       | F42:1345 | OB5955 H1 Ro.raw | 3.381E6             | 3        | 3                       | 147   | 160 |                                       |                                                         | PEAKS DB  |
| K.NPQLQLDMLMLTC(+57.02)VEIKEGALMLPHFSK.A         | N    | 98.85  | 3371.6387 | 29     | -2.7 | 843.9147  | 4 | 38.02 | 43       | F43:1969 | OB5956 H1 Ro.raw | 1.5351E8            | 12       | 12                      | 415   | 443 | Carbamidomethylation                  | C13:Carbamidomethylation:1000.00                        | PEAKS DB  |
| K.KNPQLQLDMLMLTC(+57.02)VEIKEGALMLPHFSK.A        | N    | 97.96  | 3499.7336 | 30     | -3.9 | 875.9373  | 4 | 36.80 | 41       | F41:1884 | OB5954 H1 Ro.raw | 6.677E6             | 4        | 4                       | 414   | 443 | Carbamidomethylation                  | C14:Carbamidomethylation:1000.00                        | PEAKS DB  |
| R.VLLEEN(+.98)AGGEQEER.G                         | N    | 94.48  | 1572.7267 | 14     | 2.8  | 787.3728  | 2 | 27.46 | 43       | F43:1340 | OB5956 H1 Ro.raw | 6.2395E5            | 3        | 3                       | 329   | 342 | Deamidation (NQ)                      | N6:Deamidation (NQ):121.37                              | PEAKS DB  |
| R.IFLAGDKDNVIDQIEKQAK.D                          | N    | 94.35  | 2144.1477 | 19     | -2.1 | 715.7217  | 3 | 32.42 | 42       | F42:1625 | OB5955 H1 Ro.raw | 3.3984E6            | 9        | 9                       | 536   | 554 |                                       |                                                         | PEAKS DB  |
| R.KSFNLDEGHALRIPSGFISYILNR.H                     | N    | 93.78  | 2746.4553 | 24     | -0.7 | 687.6206  | 4 | 36.29 | 43       | F43:1876 | OB5956 H1 Ro.raw | 1.1783E6            | 4        | 4                       | 248   | 271 |                                       |                                                         | PEAKS DB  |
| R.REQEWEHEHEHEEGSNR.E                            | N    | 93.49  | 2436.9424 | 19     | 0.1  | 813.3215  | 3 | 26.72 | 43       | F43:1292 | OB5956 H1 Ro.raw | 8.6025E5            | 7        | 7                       | 472   | 490 |                                       |                                                         | PEAKS DB  |
| R.EGEQEWGTPGSEVRETSR.N                           | Y    | 93.19  | 2161.9512 | 19     | 3.0  | 1081.9861 | 2 | 27.83 | 43       | F43:1353 | OB5956 H1 Ro.raw | 3.9146E7            | 8        | 8                       | 147   | 165 |                                       |                                                         | PEAKS DB  |
| F.LAGDKDNVIDQIEK.Q                               | N    | 91.83  | 1556.8046 | 14     | -6.3 | 779.4047  | 2 | 32.21 | 43       | F43:1629 | OB5956 H1 Ro.raw | 5.4162E6            | 4        | 4                       | 538   | 551 |                                       |                                                         | PEAKS DB  |
| R.IPSGFISYILN(-17.03)R.H                         | N    | 91.80  | 1361.7343 | 12     | -4.9 | 681.8711  | 2 | 38.02 | 43       | F43:1980 | OB5956 H1 Ro.raw | 1.3387E6            | 3        | 3                       | 260   | 271 | Ammonia-loss (N)                      | N11:Ammonia-loss (N):1000.00                            | PEAKS PTM |
| K.AMVVVVNK.G                                     | N    | 91.04  | 971.5837  | 9      | -0.5 | 486.7989  | 2 | 30.16 | 43       | F43:1494 | OB5956 H1 Ro.raw | 7.1361E6            | 3        | 3                       | 444   | 452 |                                       |                                                         | PEAKS DB  |
| K.SFNLDEGH(+15.99)ALR.I                          | N    | 90.73  | 1273.6051 | 11     | 0.9  | 637.8104  | 2 | 30.16 | 43       | F43:1507 | OB5956 H1 Ro.raw | 8.7681E5            | 2        | 2                       | 249   | 259 | Oxidation (HW)                        | H8:Oxidation (HW):1000.00                               | PEAKS PTM |
| R.NNPFYFYSRR.F                                   | N    | 89.95  | 1296.6364 | 10     | -2.5 | 649.3239  | 2 | 28.89 | 43       | F43:1417 | OB5956 H1 Ro.raw | 1.3445E8            | 22       | 22                      | 166   | 175 |                                       |                                                         | PEAKS DB  |
| K.D(+57.02)LAFPGSGEQVEK.L                        | N    | 88.60  | 1432.6833 | 13     | -0.1 | 717.3489  | 2 | 31.08 | 41       | F41:1535 | OB5954 H1 Ro.raw | 9.7986E5            | 3        | 3                       | 555   | 567 | Carbamidomethylation (DHKE, X@N-term) | D1:Carbamidomethylation (DHKE, X@N-term):131.10         | PEAKS PTM |
| K.SFNLDEGH(+57.02)ALR.I                          | N    | 88.30  | 1314.6316 | 11     | -0.1 | 658.3230  | 2 | 28.22 | 41       | F41:1349 | OB5954 H1 Ro.raw | 2.9996E6            | 3        | 3                       | 249   | 259 | Carbamidomethylation (DHKE, X@N-term) | H8:Carbamidomethylation (DHKE, X@N-term):30.36          | PEAKS PTM |
| K.EGALMLPHFSK.A                                  | N    | 88.21  | 1342.6703 | 12     | 2.5  | 672.3441  | 2 | 30.67 | 43       | F43:1529 | OB5956 H1 Ro.raw | 1.4087E7            | 5        | 5                       | 432   | 443 |                                       |                                                         | PEAKS DB  |
| K.NPQLQLDMM(-48.00)LTC(+57.02)VEIK.E             | N    | 88.05  | 1998.9755 | 17     | 1.9  | 1000.4969 | 2 | 32.85 | 43       | F43:1670 | OB5956 H1 Ro.raw | 5.9032E6            | 3        | 3                       | 415   | 431 | Carbamidomethylation                  | M10:Deamidomethyl:14.02;C13:Carbamid                    | PEAKS PTM |
| total 244 peptides                               |      |        |           |        |      |           |   |       |          |          |                  |                     |          |                         |       |     |                                       |                                                         |           |



| Peptide                                            | Uniq | -10lgP | Mass      | Length | ppm  | m/z       | z | RT    | Fraction | Scan     | Source File             | Area Roasted in gel | #Feature | #Feature Roasted in gel | Start | End | PTM                                        | AScore                                                                            | Found By     |
|----------------------------------------------------|------|--------|-----------|--------|------|-----------|---|-------|----------|----------|-------------------------|---------------------|----------|-------------------------|-------|-----|--------------------------------------------|-----------------------------------------------------------------------------------|--------------|
|                                                    |      |        |           |        |      |           |   |       |          |          |                         |                     |          |                         |       |     |                                            | omethylati<br>on:1000.00                                                          |              |
| K.GSEEDITNPINLR.D                                  | N    | 87.68  | 1585.7583 | 14     | 2.3  | 793.8882  | 2 | 31.16 | 42       | F42:1548 | OB5955<br>H1<br>Ro.raw  | 3.3709E6            | 3        | 3                       | 380   | 393 |                                            |                                                                                   | PEAKS<br>DB  |
| R.GRREQEWEEEEEEEEEGSNR.E                           | N    | 87.21  | 2650.0649 | 21     | 1.1  | 884.3632  | 3 | 26.73 | 41       | F41:1280 | OB5954<br>H1<br>Ro.raw  | 7.9956E5            | 6        | 6                       | 470   | 490 |                                            |                                                                                   | PEAKS<br>DB  |
| R.NNPFYFPSR.R                                      | N    | 86.35  | 1140.5352 | 9      | -0.1 | 571.2748  | 2 | 31.76 | 43       | F43:1593 | OB5956<br>H1<br>Ro.raw  | 1.7218E7            | 11       | 11                      | 166   | 174 |                                            |                                                                                   | PEAKS<br>DB  |
| K.S(+57.02)FNLDEGHALR.I                            | N    | 86.31  | 1314.6316 | 11     | -0.5 | 658.3228  | 2 | 28.11 | 42       | F42:1359 | OB5955<br>H1<br>Ro.raw  | 2.6997E6            | 4        | 4                       | 249   | 259 | Carbamidomethylation<br>(DHKE, X@N-term):9 | S1:Carbami<br>dometh<br>ylation (D<br>HKE, X@N<br>-term):9<br>1.04                | PEAKS<br>PTM |
| I.PSGFISYILNR.H                                    | N    | 85.97  | 1265.6768 | 11     | -4.6 | 633.8427  | 2 | 36.75 | 43       | F43:1894 | OB5956<br>H1<br>Ro.raw  | 3.5986E5            | 2        | 2                       | 261   | 271 |                                            |                                                                                   | PEAKS<br>DB  |
| R.IPSGFISYILNRHDQNLR.V                             | N    | 84.75  | 2256.1763 | 19     | 6.5  | 753.0709  | 3 | 33.61 | 43       | F43:1714 | OB5956<br>H1<br>Ro.raw  | 6.1581E7            | 21       | 21                      | 260   | 278 |                                            |                                                                                   | PEAKS<br>DB  |
| R.I(+27.99)FLAGDKDNVIDQIEK.Q                       | N    | 84.60  | 1844.9519 | 16     | -2.1 | 923.4813  | 2 | 36.23 | 41       | F41:1853 | OB5954<br>H1<br>Ro.raw  | 1.9485E6            | 3        | 3                       | 536   | 551 | Formylation                                | I1:Formyl<br>ation:98.7<br>5                                                      | PEAKS<br>PTM |
| K.SFNLDEGH(+15.99)ALRIPSGFISYILNR.H                | N    | 83.49  | 2634.3555 | 23     | -4.0 | 879.1223  | 3 | 38.76 | 43       | F43:2023 | OB5956<br>H1<br>Ro.raw  | 8.8519E5            | 1        | 1                       | 249   | 271 | Oxidation (HW)                             | H8:Oxidat<br>ion (HW):<br>1000.00                                                 | PEAKS<br>PTM |
| K.KNPQLQDLDMMLTC(+57.02)VEIKEGALM(+15.99)LPHFNSK.A | N    | 83.11  | 3515.7285 | 30     | -1.9 | 879.9377  | 4 | 36.03 | 43       | F43:1857 | OB5956<br>H1<br>Ro.raw  | 6.6263E6            | 3        | 3                       | 414   | 443 | Carbamidomethylation;<br>Oxidation (M)     | C14:Carb<br>amidomet<br>hylation:1<br>000.00;M<br>23:Oxidati<br>on (M):11<br>4.34 | PEAKS<br>DB  |
| R.NTLEAAFAEFNEIRR.V                                | N    | 82.99  | 1893.9332 | 16     | -2.6 | 947.9714  | 2 | 34.11 | 42       | F42:1711 | OB5955<br>H1<br>Ro.raw  | 3.0959E8            | 36       | 35                      | 313   | 328 |                                            |                                                                                   | PEAKS<br>DB  |
| K.A(+57.02)MVIVVVNKG TGNLELVAVR.K                  | N    | 82.14  | 2138.2246 | 20     | -5.4 | 1070.1138 | 2 | 34.47 | 42       | F42:1739 | OB5955<br>H1<br>Ro.raw  | 4.4412E6            | 3        | 3                       | 444   | 463 | Carbamidomethylation<br>(DHKE, X@N-term)   | A1:Carba<br>midomet<br>hylation (D<br>HKE, X@N<br>-term):20<br>7.56               | PEAKS<br>PTM |
| K.DLAFIGSGEQVEKLIK.N                               | N    | 80.89  | 1729.9249 | 16     | -1.6 | 865.9706  | 2 | 33.95 | 30       | F30:1478 | OB5926<br>H3B<br>Ro.raw | 3.9305E5            | 5        | 4                       | 555   | 570 |                                            |                                                                                   | PEAKS<br>DB  |
| I.FLAGDKDNVIDQIEK.Q                                | N    | 80.64  | 1703.8729 | 15     | -5.7 | 852.9388  | 2 | 32.22 | 43       | F43:1635 | OB5956<br>H1<br>Ro.raw  | 3.1343E5            | 3        | 3                       | 537   | 551 |                                            |                                                                                   | PEAKS<br>DB  |
| K.EGALM(+15.99)LPHFNSK.A                           | N    | 80.48  | 1358.6653 | 12     | 1.1  | 680.3406  | 2 | 29.85 | 43       | F43:1485 | OB5956<br>H1<br>Ro.raw  | 3.0314E6            | 5        | 5                       | 432   | 443 | Oxidation (M)                              | M5:Oxidat<br>ion (M):1<br>000.00                                                  | PEAKS<br>DB  |
| K.GTGNLELVAVR.K                                    | N    | 80.39  | 1127.6299 | 11     | -1.3 | 564.8215  | 2 | 30.21 | 41       | F41:1476 | OB5954<br>H1<br>Ro.raw  | 2.4706E7            | 5        | 5                       | 453   | 463 |                                            |                                                                                   | PEAKS<br>DB  |
| R.NTLEAAFN(+.98)AEFNEIRR.V                         | N    | 79.02  | 1894.9172 | 16     | -2.2 | 948.4638  | 2 | 32.35 | 41       | F41:1616 | OB5954<br>H1<br>Ro.raw  | 1.3357E6            | 5        | 5                       | 313   | 328 | Deamidation (NQ)                           | N8:Deami<br>dation (N<br>Q):48.12                                                 | PEAKS<br>DB  |
| R.VLLEENAGGEQEER(+14.02).G                         | N    | 78.92  | 1585.7583 | 14     | 0.7  | 793.8870  | 2 | 27.86 | 41       | F41:1339 | OB5954<br>H1<br>Ro.raw  | 1.6341E5            | 3        | 3                       | 329   | 342 | Methylation(KR)                            | R14:Meth<br>ylation(K<br>R):1000.00                                               | PEAKS<br>PTM |
| K.GTGNLELVAVRK.E                                   | N    | 78.87  | 1255.7249 | 12     | 0.7  | 628.8701  | 2 | 27.30 | 41       | F41:1322 | OB5954<br>H1<br>Ro.raw  | 2.29E7              | 10       | 10                      | 453   | 464 |                                            |                                                                                   | PEAKS<br>DB  |
| K.QFQNLQNHR.I                                      | N    | 78.35  | 1183.5846 | 9      | 0.0  | 592.7996  | 2 | 23.81 | 42       | F42:1102 | OB5955<br>H1<br>Ro.raw  | 1.5125E5            | 6        | 6                       | 199   | 207 |                                            |                                                                                   | PEAKS<br>DB  |
| total 244 peptides                                 |      |        |           |        |      |           |   |       |          |          |                         |                     |          |                         |       |     |                                            |                                                                                   |              |

| Peptide                                                    | Uniq | -10lgP | Mass      | Length | ppm  | m/z       | z | RT    | Fraction | Scan     | Source File      | Area Roasted in gel | #Feature | #Feature Roasted in gel | Start | End | PTM                                 | AScore                                                                           | Found By  |
|------------------------------------------------------------|------|--------|-----------|--------|------|-----------|---|-------|----------|----------|------------------|---------------------|----------|-------------------------|-------|-----|-------------------------------------|----------------------------------------------------------------------------------|-----------|
| K.NPQLQDLDMM(+15.99)LTC(+57.02)VEIKEGALMLPHFNSK.A          | N    | 78.01  | 3387.6335 | 29     | -0.8 | 1130.2175 | 3 | 36.42 | 41       | F41:1862 | OB5954 H1 Ro.raw | 6.8935E7            | 6        | 6                       | 415   | 443 | Oxidation (M); Carbamidomethylation | M10:Oxidation (M):24.44;C13:Carbamidomethylation:1000.00                         | PEAKS DB  |
| R.LFEVKPKDKNPQLQDLDMMLTC(+57.02)VEIK.E                     | N    | 77.87  | 3131.6069 | 26     | -4.0 | 1044.8721 | 3 | 34.65 | 42       | F42:1756 | OB5955 H1 Ro.raw | 5.0788E6            | 4        | 4                       | 406   | 431 | Carbamidomethylation                | C22:Carbamidomethylation:1000.00                                                 | PEAKS DB  |
| K.NPQLQDLDM(+15.99)MLTC(+57.02)VEIKEGALM(+15.99)LPHFNSK.A  | N    | 77.10  | 3403.6284 | 29     | 1.1  | 851.9153  | 4 | 37.51 | 41       | F41:1883 | OB5954 H1 Ro.raw | 7.3887E6            | 7        | 7                       | 415   | 443 | Oxidation (M); Carbamidomethylation | M9:Oxidation (M):27.96;C13:Carbamidomethylation:1000.00;M22:Oxidation (M):71.31  | PEAKS DB  |
| R.IFLAGDKDNVIDQIEKQ(+.98)AK.D                              | N    | 76.22  | 2145.1316 | 19     | 1.5  | 716.0522  | 3 | 33.08 | 42       | F42:1661 | OB5955 H1 Ro.raw | 0                   | 0        | 0                       | 536   | 554 | Deamidation (NQ)                    | Q17:Deamidation (NQ):48.83                                                       | PEAKS DB  |
| R.EETSRN(+.98)NPFYFPSRR.F                                  | N    | 75.62  | 1899.8864 | 15     | -0.2 | 634.3026  | 3 | 28.39 | 41       | F41:1381 | OB5954 H1 Ro.raw | 3.2976E5            | 2        | 2                       | 161   | 175 | Deamidation (NQ)                    | N6:Deamidation (NQ):33.98                                                        | PEAKS DB  |
| L.AGDKDNVIDQIEK.Q                                          | N    | 75.39  | 1443.7205 | 13     | -3.7 | 722.8649  | 2 | 32.08 | 42       | F42:1607 | OB5955 H1 Ro.raw | 3.3426E5            | 1        | 1                       | 539   | 551 |                                     |                                                                                  | PEAKS DB  |
| K.Q(-17.03)FQNLQNHR.I                                      | N    | 75.35  | 1166.5581 | 9      | -1.2 | 584.2856  | 2 | 28.00 | 43       | F43:1365 | OB5956 H1 Ro.raw | 4.927E6             | 4        | 4                       | 199   | 207 | Pyro-glu from Q                     | Q1:Pyro-glu from Q:1000.00                                                       | PEAKS PTM |
| R.SSDNEGVIVK.V                                             | N    | 75.32  | 1046.5244 | 10     | -1.0 | 524.2690  | 2 | 23.58 | 41       | F41:1103 | OB5954 H1 Ro.raw | 3.7568E5            | 3        | 3                       | 351   | 360 |                                     |                                                                                  | PEAKS DB  |
| R.VAKISMPVNTPGQFEDFFPASSR.D                                | N    | 74.27  | 2524.2419 | 23     | -2.9 | 842.4188  | 3 | 34.29 | 42       | F42:1735 | OB5955 H1 Ro.raw | 1.4483E6            | 3        | 3                       | 279   | 301 |                                     |                                                                                  | PEAKS DB  |
| K.NPQLQDLDM(+15.99)M(+15.99)LTC(+57.02)VEIKEGALMLPHFNSK.A  | N    | 73.00  | 3403.6284 | 29     | -3.9 | 1135.5457 | 3 | 35.83 | 43       | F43:1849 | OB5956 H1 Ro.raw | 7.8068E6            | 5        | 5                       | 415   | 443 | Oxidation (M); Carbamidomethylation | M9:Oxidation (M):54.18;M10:Oxidation (M):63.99;C13:Carbamidomethylation:1000.00  | PEAKS DB  |
| K.KNPQLQDLDM(+15.99)MLTC(+57.02)VEIKEGALM(+15.99)LPHFNSK.A | N    | 72.71  | 3531.7234 | 30     | -1.9 | 883.9364  | 4 | 35.86 | 41       | F41:1821 | OB5954 H1 Ro.raw | 7.53E5              | 1        | 1                       | 414   | 443 | Carbamidomethylation; Oxidation (M) | M10:Oxidation (M):17.01;C14:Carbamidomethylation:1000.00;M23:Oxidation (M):85.25 | PEAKS DB  |
| R.VLLEENAGGEQEERQGR.R                                      | N    | 72.44  | 1912.9238 | 17     | 0.6  | 957.4698  | 2 | 25.30 | 42       | F42:1191 | OB5955 H1 Ro.raw | 3.1353E6            | 8        | 8                       | 329   | 345 |                                     |                                                                                  | PEAKS DB  |
| K.QAKDLAFPGSGEQVEK.L                                       | N    | 72.39  | 1702.8525 | 16     | 1.2  | 568.6255  | 3 | 27.08 | 43       | F43:1321 | OB5956 H1 Ro.raw | 2.8232E5            | 6        | 6                       | 552   | 567 |                                     |                                                                                  | PEAKS DB  |
| K.EGALMLPHFN(+.98)SK.A                                     | N    | 71.37  | 1343.6543 | 12     | 2.6  | 672.8362  | 2 | 31.66 | 43       | F43:1595 | OB5956 H1 Ro.raw | 1.0101E5            | 2        | 2                       | 432   | 443 | Deamidation (NQ)                    | N10:Deamidation (NQ):1000.00                                                     | PEAKS DB  |
| R.EQEW(+15.99)EEEEEEEEEGSNR.E                              | N    | 70.36  | 2296.8362 | 18     | 3.2  | 1149.4291 | 2 | 27.67 | 41       | F41:1333 | OB5954 H1 Ro.raw | 1.024E6             | 3        | 3                       | 473   | 490 | Oxidation (HW)                      | W4:Oxidation (HW):1000.00                                                        | PEAKS PTM |
| total 244 peptides                                         |      |        |           |        |      |           |   |       |          |          |                  |                     |          |                         |       |     |                                     |                                                                                  |           |

| Peptide                                        | Uniq | -10lgP | Mass      | Length | ppm  | m/z       | z | RT    | Fraction | Scan     | Source File       | Area Roasted in gel | #Feature | #Feature Roasted in gel | Start | End | PTM                                         | AScore                                                     | Found By  |
|------------------------------------------------|------|--------|-----------|--------|------|-----------|---|-------|----------|----------|-------------------|---------------------|----------|-------------------------|-------|-----|---------------------------------------------|------------------------------------------------------------|-----------|
| F.NLDEGHALR.I                                  | N    | 70.14  | 1023.5097 | 9      | -2.5 | 512.7609  | 2 | 28.00 | 43       | F43:1370 | OB5956 H1 Ro.raw  | 2.6181E6            | 3        | 3                       | 251   | 259 |                                             |                                                            | PEAKS DB  |
| R.N(+.98)TLEAAFNAEFNEIRR.V                     | N    | 69.73  | 1894.9172 | 16     | 0.4  | 948.4662  | 2 | 32.39 | 42       | F42:1620 | OB5955 H1 Ro.raw  | 2.6319E6            | 3        | 3                       | 313   | 328 | Deamidation (NQ)                            | N1:Deamidation (NQ):41.52                                  | PEAKS DB  |
| E.PDLSNNFGR.L                                  | N    | 69.35  | 1018.4832 | 9      | 0.9  | 510.2493  | 2 | 31.57 | 43       | F43:1584 | OB5956 H1 Ro.raw  | 1.3026E6            | 4        | 4                       | 397   | 405 |                                             |                                                            | PEAKS DB  |
| R.K(+57.02)SFNLDEGHALR.I                       | N    | 69.20  | 1442.7266 | 12     | -0.1 | 722.3705  | 2 | 26.25 | 42       | F42:1250 | OB5955 H1 Ro.raw  | 4.0798E5            | 6        | 6                       | 248   | 259 | Carbamidomethylation (DHKE, X@N-term):76.17 | K1:Carbamidomethylation (DHKE, X@N-term):76.17             | PEAKS PTM |
| R.LFEVKPKKPNQLQDLDDMM(+15.99)LTC(+57.02)VEIK.E | N    | 69.17  | 3147.6018 | 26     | 2.2  | 787.9095  | 4 | 33.24 | 42       | F42:1670 | OB5955 H1 Ro.raw  | 2.0797E6            | 2        | 2                       | 406   | 431 | Oxidation (M); Carbamidomethylation         | M19:Oxidation (M):40.00;C22:Carbamidomethylation:1000.00   | PEAKS DB  |
| K.SFNLDE(+57.02)GHALRIPSGFISYILNR.H            | N    | 69.07  | 2675.3818 | 23     | -1.9 | 892.7996  | 3 | 37.80 | 43       | F43:1964 | OB5956 H1 Ro.raw  | 0                   | 0        | 0                       | 249   | 271 |                                             | E6:Carbamidomethylation (DHKE, X@N-term):0.00              | PEAKS PTM |
| R.IFLAGDKDNVID(+57.02)QIEK.Q                   | N    | 69.05  | 1873.9785 | 16     | -1.3 | 937.9953  | 2 | 32.42 | 42       | F42:1608 | OB5955 H1 Ro.raw  | 8.0339E6            | 1        | 1                       | 536   | 551 |                                             | D12:Carbamidomethylation (DHKE, X@N-term):15.85            | PEAKS PTM |
| R.IVQIEARPNTLVLPK.H                            | Y    | 68.17  | 1690.0140 | 15     | -1.0 | 846.0134  | 2 | 30.56 | 41       | F41:1509 | OB5954 H1 Ro.raw  | 4.6727E7            | 21       | 21                      | 208   | 222 |                                             |                                                            | PEAKS DB  |
| A.GDKDNVIDQIEK.Q                               | N    | 68.14  | 1372.6833 | 12     | -7.0 | 687.3441  | 2 | 32.22 | 43       | F43:1632 | OB5956 H1 Ro.raw  | 1.1241E6            | 3        | 3                       | 540   | 551 |                                             |                                                            | PEAKS DB  |
| G.SEEEDITNPINLRDGEPLDLSNNFGR.L                 | N    | 68.10  | 2830.3005 | 25     | -1.6 | 944.4417  | 3 | 33.02 | 30       | F30:1421 | OB5926 H3B Ro.raw | 1.3758E5            | 3        | 3                       | 381   | 405 |                                             |                                                            | PEAKS DB  |
| R.RVLLEEN(+.98)AGGEQEER.G                      | N    | 67.83  | 1728.8278 | 15     | -0.8 | 577.2827  | 3 | 25.96 | 42       | F42:1233 | OB5955 H1 Ro.raw  | 1.359E4             | 2        | 2                       | 328   | 342 | Deamidation (NQ)                            | N7:Deamidation (NQ):77.53                                  | PEAKS DB  |
| R.DQS(-18.01)SYLQGFSR.N                        | N    | 67.70  | 1268.5785 | 11     | 0.2  | 635.2966  | 2 | 30.91 | 41       | F41:1537 | OB5954 H1 Ro.raw  | 6.4401E5            | 3        | 3                       | 302   | 312 | Dehydration                                 | S3:Dehydration:40.00                                       | PEAKS PTM |
| R.RVLLEENAGGEQEERGQR.R                         | N    | 67.67  | 2069.0249 | 18     | 1.9  | 690.6835  | 3 | 25.60 | 41       | F41:1205 | OB5954 H1 Ro.raw  | 1.8247E6            | 3        | 3                       | 328   | 345 |                                             |                                                            | PEAKS DB  |
| K.Q(-17.03)AKDLAFPGSGEQVEK.L                   | N    | 67.52  | 1685.8260 | 16     | 0.1  | 843.9204  | 2 | 29.98 | 43       | F43:1503 | OB5956 H1 Ro.raw  | 9.9003E4            | 3        | 3                       | 552   | 567 | Pyro-glu from Q                             | Q1:Pyro-glu from Q:1000.00                                 | PEAKS PTM |
| K.NPQLQ(+.98)DLDMMLTLC(+57.02)VEIK.E           | N    | 67.25  | 2047.9629 | 17     | 1.5  | 1024.9902 | 2 | 44.46 | 43       | F43:2348 | OB5956 H1 Ro.raw  | 0                   | 0        | 0                       | 415   | 431 | Carbamidomethylation                        | Q5:Deamidation (NQ):19.68;C13:Carbamidomethylation:1000.00 | PEAKS DB  |
| K.SFNLDE(-18.01)EGHALR.I                       | N    | 66.88  | 1239.5996 | 11     | 2.9  | 620.8089  | 2 | 28.79 | 41       | F41:1400 | OB5954 H1 Ro.raw  | 0                   | 0        | 0                       | 249   | 259 | Dehydration                                 | D5:Dehydration:49.79                                       | PEAKS PTM |
| K.AM(+15.99)VIVVVNK.G                          | N    | 66.42  | 987.5787  | 9      | 1.1  | 494.7972  | 2 | 27.11 | 41       | F41:1283 | OB5954 H1 Ro.raw  | 1.8879E6            | 3        | 3                       | 444   | 452 | Oxidation (M)                               | M2:Oxidation (M):1000.00                                   | PEAKS DB  |
| K.KNPQLQDLDMMLTCVEIK(+14.02).E                 | N    | 66.06  | 2132.0679 | 18     | -0.6 | 1067.0405 | 2 | 36.31 | 41       | F41:1858 | OB5954 H1 Ro.raw  | 5.2356E5            | 2        | 2                       | 414   | 431 | Methylation(KR)                             | K18:Methylation(KR):130.57                                 | PEAKS PTM |
| total 244 peptides                             |      |        |           |        |      |           |   |       |          |          |                   |                     |          |                         |       |     |                                             |                                                            |           |

| Peptide                                                  | Uniq | -10lgP | Mass      | Length | ppm  | m/z       | z | RT    | Fraction | Scan     | Source File      | Area Roasted in gel | #Feature | #Feature Roasted in gel | Start | End | PTM                                   | AScore                                                               | Found By  |
|----------------------------------------------------------|------|--------|-----------|--------|------|-----------|---|-------|----------|----------|------------------|---------------------|----------|-------------------------|-------|-----|---------------------------------------|----------------------------------------------------------------------|-----------|
| R.EETSRNPNPFYFPSRR.F                                     | N    | 65.61  | 1898.9023 | 15     | 1.8  | 633.9759  | 3 | 27.75 | 42       | F42:1339 | OB5955 H1 Ro.raw | 8.693E5             | 4        | 4                       | 161   | 175 |                                       |                                                                      | PEAKS DB  |
| K.NPQLQDLDMMLTC(+57.02)VEIKEGALM(+15.99)LPHFNSK.A        | N    | 64.76  | 3387.6335 | 29     | -0.6 | 847.9152  | 4 | 37.63 | 43       | F43:1915 | OB5956 H1 Ro.raw | 8.7706E7            | 6        | 6                       | 415   | 443 | Carbamidomethylation; Oxidation (M)   | C13:Carb amidomet hylation:1 000.00;M 22:Oxidati on (M):8 2.05       | PEAKS DB  |
| R.IPSGFISY(+125.90)ILNR.H                                | N    | 64.64  | 1504.6575 | 12     | -1.9 | 753.3346  | 2 | 38.39 | 43       | F43:2001 | OB5956 H1 Ro.raw | 2.0334E5            | 2        | 2                       | 260   | 271 | Iodination                            | Y8:Iodinat ion:1000. 00                                              | PEAKS PTM |
| R.IPSGFISYILN(+.98)RHDNQNL.R.V                           | N    | 64.64  | 2257.1604 | 19     | 4.7  | 753.3976  | 3 | 34.29 | 42       | F42:1740 | OB5955 H1 Ro.raw | 6.9901E5            | 2        | 2                       | 260   | 278 | Deamidation (NQ)                      | N11:Dea midation (NQ):36.2 4                                         | PEAKS DB  |
| R.WGPAEPR.E                                              | Y    | 64.52  | 811.3976  | 7      | 1.8  | 406.7068  | 2 | 25.60 | 41       | F41:1224 | OB5954 H1 Ro.raw | 1.6282E6            | 3        | 3                       | 109   | 115 |                                       |                                                                      | PEAKS DB  |
| R.IVQIEARPN.T                                            | Y    | 64.48  | 1038.5822 | 9      | -0.5 | 520.2981  | 2 | 25.87 | 42       | F42:1229 | OB5955 H1 Ro.raw | 4.4669E4            | 3        | 3                       | 208   | 216 |                                       |                                                                      | PEAKS DB  |
| A.FPGSGEQVEK.L                                           | N    | 64.10  | 1076.5138 | 10     | -3.4 | 539.2623  | 2 | 30.29 | 42       | F42:1495 | OB5955 H1 Ro.raw | 4.0412E5            | 3        | 3                       | 558   | 567 |                                       |                                                                      | PEAKS DB  |
| K.ISMPVNTPGQFEDFFPASSRDQSSYLQGF.SR.N                     | N    | 63.85  | 3494.6201 | 31     | -0.9 | 1165.8796 | 3 | 36.01 | 43       | F43:1851 | OB5956 H1 Ro.raw | 5.8723E6            | 6        | 6                       | 282   | 312 |                                       |                                                                      | PEAKS DB  |
| R.LFEVKPDKK.N                                            | N    | 63.79  | 1102.6385 | 9      | 0.6  | 552.3269  | 2 | 24.50 | 43       | F43:1159 | OB5956 H1 Ro.raw | 1.1348E6            | 6        | 6                       | 406   | 414 |                                       |                                                                      | PEAKS DB  |
| Q.SSYLQGF.SR.N                                           | N    | 63.16  | 1043.5035 | 9      | 1.4  | 522.7598  | 2 | 29.29 | 41       | F41:1438 | OB5954 H1 Ro.raw | 6.2708E4            | 3        | 3                       | 304   | 312 |                                       |                                                                      | PEAKS DB  |
| K.QFQNLQN(+.98)HR.I                                      | N    | 63.09  | 1184.5686 | 9      | 5.4  | 593.2948  | 2 | 23.60 | 43       | F43:1114 | OB5956 H1 Ro.raw | 8.0412E2            | 1        | 1                       | 199   | 207 |                                       | N7:Deami dation (N Q):0.00                                           | PEAKS DB  |
| K.EGALMLPH(+14.02)FNSK.A                                 | N    | 63.06  | 1356.6860 | 12     | -4.2 | 679.3475  | 2 | 30.85 | 43       | F43:1554 | OB5956 H1 Ro.raw | 2.9707E5            | 3        | 3                       | 432   | 443 | Methylation(others)                   | H8:Methyl ation(oth ers):65.81                                       | PEAKS PTM |
| P.SGFISYILNR.H                                           | N    | 63.04  | 1168.6240 | 10     | 1.5  | 585.3202  | 2 | 35.08 | 43       | F43:1803 | OB5956 H1 Ro.raw | 2.9962E5            | 1        | 1                       | 262   | 271 |                                       |                                                                      | PEAKS DB  |
| N.LDEGHALR.I                                             | N    | 62.84  | 909.4668  | 8      | 0.0  | 455.7407  | 2 | 27.93 | 42       | F42:1350 | OB5955 H1 Ro.raw | 1.8672E5            | 3        | 3                       | 252   | 259 |                                       |                                                                      | PEAKS DB  |
| K.A(+57.02)MVIVVVNKG.TGNLELVAVRK.E                       | N    | 62.52  | 2266.3196 | 21     | 0.7  | 1134.1678 | 2 | 32.98 | 42       | F42:1660 | OB5955 H1 Ro.raw | 1.5099E7            | 6        | 6                       | 444   | 464 | Carbamidomethylation (DHKE, X@N-term) | A1:Carba midometh ylation (D HKE, X@N -term):13 9.69                 | PEAKS PTM |
| K.HADADNILVIQQGQATVTVANGN(+.98)NRK.S                     | N    | 62.31  | 2747.3950 | 26     | -0.1 | 916.8055  | 3 | 30.70 | 41       | F41:1517 | OB5954 H1 Ro.raw | 8.5956E3            | 1        | 1                       | 223   | 248 |                                       | N23:Dea midation (NQ):9.40                                           | PEAKS DB  |
| K.SFN(+15.99)LDEGHALR.I                                  | N    | 62.00  | 1273.6051 | 11     | 0.0  | 637.8098  | 2 | 27.46 | 43       | F43:1330 | OB5956 H1 Ro.raw | 9.622E5             | 3        | 3                       | 249   | 259 | Oxidation or Hydroxylation            | N3:Oxidat ion or Hyd roxylation:55.92                                | PEAKS PTM |
| R.IP(+15.99)SGFISYILNR.H                                 | N    | 61.98  | 1394.7557 | 12     | -0.8 | 698.3846  | 2 | 37.47 | 43       | F43:1932 | OB5956 H1 Ro.raw | 3.2208E6            | 4        | 4                       | 260   | 271 | Oxidation or Hydroxylation            | P2:Oxidati on or Hyd roxylation:39.25                                | PEAKS PTM |
| K.NPQLQDLDM(+15.99)LTC(+57.02)VEIKEGALM(+15.99)LPHFNSK.A | N    | 61.19  | 3403.6284 | 29     | 0.3  | 851.9147  | 4 | 35.86 | 41       | F41:1801 | OB5954 H1 Ro.raw | 3.4294E6            | 4        | 4                       | 415   | 443 | Oxidation (M); Carbamidomethylation   | M10:Oxid ation (M): 21.94;C1 3:Carbami domethyla tion:1000. 00;M22:O | PEAKS DB  |
| total 244 peptides                                       |      |        |           |        |      |           |   |       |          |          |                  |                     |          |                         |       |     |                                       |                                                                      |           |

| Peptide                                                           | Uniq | -10lgP | Mass      | Length | ppm  | m/z       | z | RT    | Fraction | Scan     | Source File       | Area Roasted in gel | #Feature | #Feature Roasted in gel | Start | End | PTM                                   | AScore                                                                                                        | Found By  |
|-------------------------------------------------------------------|------|--------|-----------|--------|------|-----------|---|-------|----------|----------|-------------------|---------------------|----------|-------------------------|-------|-----|---------------------------------------|---------------------------------------------------------------------------------------------------------------|-----------|
|                                                                   |      |        |           |        |      |           |   |       |          |          |                   |                     |          |                         |       |     |                                       | xidation (M):61.50                                                                                            |           |
| K.G(+57.02)TGNLELVAVRK.E                                          | N    | 60.73  | 1312.7462 | 12     | -0.4 | 657.3801  | 2 | 27.30 | 41       | F41:1303 | OB5954 H1 Ro.raw  | 3.6978E5            | 2        | 2                       | 453   | 464 | Carbamidomethylation (DHKE, X@N-term) | G1:Carbamidomethylation (DHKE, X@N-term):55.46                                                                | PEAKS PTM |
| R.EQEWEEEEEEEEGSNREVR.R                                           | N    | 60.58  | 2821.1545 | 22     | 1.9  | 941.3939  | 3 | 26.71 | 43       | F43:1297 | OB5956 H1 Ro.raw  | 1.0274E6            | 4        | 4                       | 473   | 494 |                                       |                                                                                                               | PEAKS DB  |
| K.NPQLQLDLM(+15.99)M(+15.99)LTC(+57.02)VEIKEGALM(+15.99)LPHFNSK.A | N    | 60.17  | 3419.6233 | 29     | -0.9 | 855.9124  | 4 | 34.83 | 42       | F42:1766 | OB5955 H1 Ro.raw  | 1.2322E6            | 3        | 3                       | 415   | 443 | Oxidation (M); Carbamidomethylation   | M9:Oxidation (M):1000.00;M10:Oxidation (M):1000.00;C13:Carbamidomethylation:1000.00;M22:Oxidation (M):1000.00 | PEAKS DB  |
| R.IPSGFISY(+15.99)ILNR.H                                          | N    | 60.13  | 1394.7557 | 12     | -0.7 | 698.3846  | 2 | 35.11 | 41       | F41:1859 | OB5954 H1 Ro.raw  | 3.4529E6            | 5        | 5                       | 260   | 271 | Oxidation or Hydroxylation            | Y8:Oxidation or Hydroxylation:67.76                                                                           | PEAKS PTM |
| L.DEGHALR.I                                                       | N    | 59.61  | 796.3828  | 7      | 2.5  | 399.1996  | 2 | 27.93 | 42       | F42:1351 | OB5955 H1 Ro.raw  | 9.3538E4            | 3        | 3                       | 253   | 259 |                                       |                                                                                                               | PEAKS DB  |
| R.LFEVKPKKPNPQLQ(+.98)DLDM(+15.99)LTC(+57.02)VEIK.E               | N    | 59.38  | 3148.5857 | 26     | 7.4  | 788.1595  | 4 | 33.17 | 42       | F42:1670 | OB5955 H1 Ro.raw  | 3.9804E5            | 1        | 1                       | 406   | 431 | Oxidation (M); Carbamidomethylation   | Q14:Deamidation (NQ):0.00;M19:Oxidation (M):23.10;C22:Carbamidomethylation:1000.00                            | PEAKS DB  |
| R.VLLEEN(-17.03)AGGEQEER.G                                        | N    | 59.22  | 1554.7162 | 14     | 1.2  | 778.3663  | 2 | 27.73 | 42       | F42:1335 | OB5955 H1 Ro.raw  | 0                   | 0        | 0                       | 329   | 342 | Ammonia-loss (N)                      | N6:Ammonia-loss (N):1000.00                                                                                   | PEAKS PTM |
| K.SFNLDEGHALRIPSGFISYILNRHDNQNL.R                                 | N    | 59.07  | 3495.7759 | 30     | 1.5  | 700.1635  | 5 | 39.97 | 40       | F40:1987 | OB5953 H3A Ro.raw | 2.0405E7            | 15       | 15                      | 249   | 278 |                                       |                                                                                                               | PEAKS DB  |
| K.SFNLDEGHALR(+31.99)IPSGFISYILNR.H                               | N    | 58.88  | 2650.3503 | 23     | 0.1  | 884.4575  | 3 | 39.14 | 42       | F42:2021 | OB5955 H1 Ro.raw  | 5.6519E5            | 1        | 1                       | 249   | 271 | Dihydroxy                             | R11:Dihydroxy:46.57                                                                                           | PEAKS PTM |
| R.LFEVKPKD.K                                                      | N    | 58.71  | 974.5436  | 8      | 1.7  | 488.2799  | 2 | 25.30 | 42       | F42:1183 | OB5955 H1 Ro.raw  | 1.7315E6            | 6        | 6                       | 406   | 413 |                                       |                                                                                                               | PEAKS DB  |
| K.GSEEDITNPIN(+.98)LRDGEPLSNNGFR.L                                | N    | 58.69  | 2888.3059 | 26     | 6.7  | 1445.1699 | 2 | 32.90 | 41       | F41:1642 | OB5954 H1 Ro.raw  | 1.7853E5            | 1        | 1                       | 380   | 405 |                                       | N12:Deamidation (NQ):12.33                                                                                    | PEAKS DB  |
| K.SFNLDE(+57.02)GHALR.I                                           | N    | 58.62  | 1314.6316 | 11     | 0.3  | 658.3232  | 2 | 27.83 | 43       | F43:1458 | OB5956 H1 Ro.raw  | 2.3371E6            | 2        | 2                       | 249   | 259 | Carbamidomethylation (DHKE, X@N-term) | E6:Carbamidomethylation (DHKE, X@N-term):27.25                                                                | PEAKS PTM |
| R.N(+57.02)NPFFPSRR.F                                             | N    | 58.56  | 1353.6577 | 10     | 1.1  | 677.8369  | 2 | 29.74 | 42       | F42:1453 | OB5955 H1 Ro.raw  | 9.24E5              | 3        | 3                       | 166   | 175 | Carbamidomethylation (DHKE, X@N-term) | N1:Carbamidomethylation (DHKE, X@N-term):1000.00                                                              | PEAKS PTM |
| R.IFLAGDKNDVIDQ(+.98)IEKQAK.D                                     | N    | 58.20  | 2145.1316 | 19     | 1.4  | 716.0521  | 3 | 33.04 | 43       | F43:1686 | OB5956 H1 Ro.raw  | 1.2153E5            | 1        | 1                       | 536   | 554 | Deamidation (NQ)                      | Q13:Deamidation (NQ):25.1                                                                                     | PEAKS DB  |
| total 244 peptides                                                |      |        |           |        |      |           |   |       |          |          |                   |                     |          |                         |       |     |                                       |                                                                                                               |           |

| Peptide                                        | Uniq | -10lgP | Mass      | Length | ppm  | m/z       | z | RT    | Fraction | Scan     | Source File       | Area Roasted in gel | #Feature | #Feature Roasted in gel | Start | End | PTM                                   | AScore                                                  | Found By  |
|------------------------------------------------|------|--------|-----------|--------|------|-----------|---|-------|----------|----------|-------------------|---------------------|----------|-------------------------|-------|-----|---------------------------------------|---------------------------------------------------------|-----------|
|                                                |      |        |           |        |      |           |   |       |          |          |                   |                     |          |                         |       |     |                                       | 8                                                       |           |
| R.VAKISM(+15.99)PVNTPGQFEDFFPASSR.D            | N    | 57.67  | 2540.2368 | 23     | 2.1  | 847.7546  | 3 | 32.98 | 42       | F42:1665 | OB5955 H1 Ro.raw  | 1.5427E5            | 1        | 1                       | 279   | 301 | Oxidation (M)                         | M6:Oxidation (M):1000.00                                | PEAKS DB  |
| K.G(+57.02)TGNLELVAVR.K                        | N    | 57.51  | 1184.6514 | 11     | -2.7 | 593.3314  | 2 | 30.10 | 42       | F42:1486 | OB5955 H1 Ro.raw  | 1.7196E5            | 2        | 2                       | 453   | 463 |                                       | G1:Carbamidomethylation (DHKE, X@N-term):19.78          | PEAKS PTM |
| R.IFLAGD(+57.02)KDNVIDQIEK.Q                   | N    | 57.43  | 1873.9785 | 16     | 1.7  | 625.6678  | 3 | 32.52 | 41       | F41:1637 | OB5954 H1 Ro.raw  | 2.7943E5            | 3        | 3                       | 536   | 551 |                                       | D6:Carbamidomethylation (DHKE, X@N-term):15.57          | PEAKS PTM |
| R.IFLAGDK(+15.99)DNVIDQIEK.Q                   | N    | 57.39  | 1832.9519 | 16     | -1.9 | 917.4814  | 2 | 31.99 | 41       | F41:1600 | OB5954 H1 Ro.raw  | 7.5922E5            | 2        | 2                       | 536   | 551 |                                       | K7:Oxidation or Hydroxylation:17.01                     | PEAKS PTM |
| N.PFYFPSRR.F                                   | N    | 57.34  | 1068.5504 | 8      | 1.1  | 535.2831  | 2 | 28.95 | 41       | F41:1414 | OB5954 H1 Ro.raw  | 4.6082E6            | 5        | 5                       | 168   | 175 |                                       |                                                         | PEAKS DB  |
| R.K(+27.99)SFNLDEGHALR.I                       | N    | 57.29  | 1413.7001 | 12     | 1.4  | 707.8583  | 2 | 28.46 | 42       | F42:1387 | OB5955 H1 Ro.raw  | 2.9777E4            | 1        | 1                       | 248   | 259 | Formylation                           | K1:Formylation:1000.00                                  | PEAKS PTM |
| R.LFEVKPDKKNPQLQDLDM(+15.99)MLTC(+57.02)VEIK.E | N    | 57.09  | 3147.6018 | 26     | -1.9 | 787.9062  | 4 | 34.20 | 41       | F41:1734 | OB5954 H1 Ro.raw  | 2.4894E6            | 4        | 4                       | 406   | 431 | Oxidation (M); Carbamidomethylation   | M18:Oxidation (M):33.98;C2:Carbamidomethylation:1000.00 | PEAKS DB  |
| K.SFNLDEGHALR(+31.99).I                        | N    | 55.96  | 1289.6000 | 11     | -1.4 | 645.8063  | 2 | 30.41 | 43       | F43:1520 | OB5956 H1 Ro.raw  | 0                   | 0        | 0                       | 249   | 259 | Dihydroxy                             | R11:Dihydroxy:119.59                                    | PEAKS PTM |
| K.ISMPVN(+.98)TPGQFEDFFPASSR.D                 | N    | 55.55  | 2227.0254 | 20     | 6.6  | 1114.5273 | 2 | 36.77 | 41       | F41:1885 | OB5954 H1 Ro.raw  | 1.01E5              | 2        | 2                       | 282   | 301 | Deamidation (NQ)                      | N6:Deamidation (NQ):42.68                               | PEAKS DB  |
| R.NTLEAAFAEFN(+.98)EIRR.V                      | N    | 54.77  | 1894.9172 | 16     | 1.8  | 948.4676  | 2 | 33.04 | 43       | F43:1685 | OB5956 H1 Ro.raw  | 2.2573E6            | 5        | 5                       | 313   | 328 | Deamidation (NQ)                      | N12:Deamidation (NQ):39.02                              | PEAKS DB  |
| V.QIEARPNTLVLPK.H                              | Y    | 54.45  | 1477.8616 | 13     | -1.8 | 739.9368  | 2 | 30.56 | 41       | F41:1513 | OB5954 H1 Ro.raw  | 1.5146E5            | 3        | 3                       | 210   | 222 |                                       |                                                         | PEAKS DB  |
| K.S(+57.02)FNLDEGHALRIPSGFISYILNR.H            | N    | 54.19  | 2675.3818 | 23     | 2.3  | 892.8033  | 3 | 39.35 | 38       | F38:1901 | OB5951 H3A Ro.raw | 6.7035E5            | 1        | 1                       | 249   | 271 | Carbamidomethylation (DHKE, X@N-term) | S1:Carbamidomethylation (DHKE, X@N-term):63.97          | PEAKS PTM |
| R.IFLAGDKDNVIDQIEK(+57.02)QAK.D                | N    | 54.07  | 2201.1692 | 19     | 0.3  | 734.7306  | 3 | 32.48 | 43       | F43:1657 | OB5956 H1 Ro.raw  | 1.2122E6            | 3        | 3                       | 536   | 554 |                                       | K16:Carbamidomethylation (DHKE, X@N-term):11.12         | PEAKS PTM |
| R.I(+27.99)PSGFISYILNR.H                       | N    | 53.77  | 1406.7557 | 12     | 0.7  | 704.3856  | 2 | 42.27 | 42       | F42:2199 | OB5955 H1 Ro.raw  | 0                   | 0        | 0                       | 260   | 271 | Formylation                           | I1:Formylation:1000.00                                  | PEAKS PTM |
| R.SKQFQNLQNH.R.I                               | Y    | 53.65  | 1398.7117 | 11     | 0.4  | 467.2447  | 3 | 24.16 | 43       | F43:1149 | OB5956 H1 Ro.raw  | 1.1379E5            | 3        | 3                       | 197   | 207 |                                       |                                                         | PEAKS DB  |
| R.IPSGFISYILNRHDN(+.98)QNLR.V                  | N    | 53.60  | 2257.1604 | 19     | -0.7 | 753.3936  | 3 | 34.26 | 41       | F41:1732 | OB5954 H1 Ro.raw  | 0                   | 0        | 0                       | 260   | 278 |                                       | N15:Deamidation (NQ):0.00                               | PEAKS DB  |
| K.HADADNILVIQQGQATVTVANGNNR.K                  | N    | 53.13  | 2618.3162 | 25     | 0.5  | 873.7798  | 3 | 30.34 | 38       | F38:1426 | OB5951 H3A Ro.raw | 1.8654E3            | 1        | 1                       | 223   | 247 |                                       |                                                         | PEAKS DB  |
| total 244 peptides                             |      |        |           |        |      |           |   |       |          |          |                   |                     |          |                         |       |     |                                       |                                                         |           |

| Peptide                                                | Uniq | -10lgP | Mass      | Length | ppm  | m/z       | z | RT    | Fraction | Scan     | Source File       | Area Roasted in gel | #Feature | #Feature Roasted in gel | Start | End | PTM                                   | AScore                                                                                | Found By  |
|--------------------------------------------------------|------|--------|-----------|--------|------|-----------|---|-------|----------|----------|-------------------|---------------------|----------|-------------------------|-------|-----|---------------------------------------|---------------------------------------------------------------------------------------|-----------|
| R.EGEQEWGTPGS(+42.01)EVR.E                             | Y    | 52.96  | 1601.6958 | 14     | 7.6  | 801.8613  | 2 | 27.46 | 43       | F43:1334 | OB5956 H1 Ro.raw  | 9.5213E4            | 3        | 3                       | 147   | 160 | Acetylation (TSCYH)                   | S11:Acetylation (TSCYH):32.97                                                         | PEAKS PTM |
| K.AM(+15.99)VIVVVKGTGNLELVAVRK.E                       | N    | 52.95  | 2225.2930 | 21     | -1.3 | 742.7706  | 3 | 32.42 | 42       | F42:1596 | OB5955 H1 Ro.raw  | 1.4247E6            | 3        | 3                       | 444   | 464 | Oxidation (M)                         | M2:Oxidation (M):1000.00                                                              | PEAKS DB  |
| K.KNPQLQ(+.98)DLDMMLTC(+57.02)VEIKEGALMLPHFNSK.A       | N    | 51.97  | 3500.7175 | 30     | 3.4  | 876.1896  | 4 | 36.93 | 43       | F43:1903 | OB5956 H1 Ro.raw  | 9.2646E6            | 2        | 2                       | 414   | 443 | Carbamidomethylation                  | Q6:Deamidation (N Q):14.04; C14:Carbamidomethylation:1000.00                          | PEAKS DB  |
| R.IFLAGDKDNVID.Q                                       | N    | 51.22  | 1318.6769 | 12     | -0.9 | 660.3451  | 2 | 31.76 | 43       | F43:1606 | OB5956 H1 Ro.raw  | 1.1173E5            | 3        | 3                       | 536   | 547 |                                       |                                                                                       | PEAKS DB  |
| K.ISM(+15.99)PVNTPGQFEDFFPASSRDQSSYLQGFSR.N            | N    | 50.25  | 3510.6150 | 31     | 0.3  | 1171.2126 | 3 | 35.35 | 36       | F36:1707 | OB5948 H3B Ro.raw | 2.4799E6            | 5        | 5                       | 282   | 312 | Oxidation (M)                         | M3:Oxidation (M):1000.00                                                              | PEAKS DB  |
| K.NPQLQLDMM(+15.99)LTC(+57.02)VEIKEGALMLPHFN(+.98)SK.A | N    | 49.99  | 3388.6174 | 29     | 6.1  | 848.1668  | 4 | 36.39 | 43       | F43:1880 | OB5956 H1 Ro.raw  | 1.7975E6            | 1        | 1                       | 415   | 443 | Oxidation (M); Carbamidomethylation   | M10:Oxidation (M):27.96; C13:Carbamidomethylation:1000.00; N27:Deamidation (NQ):18.27 | PEAKS DB  |
| R.N(-17.03)NPFYFPSRR.F                                 | N    | 49.99  | 1279.6097 | 10     | 1.1  | 427.5443  | 3 | 28.89 | 43       | F43:1434 | OB5956 H1 Ro.raw  | 5.674E5             | 3        | 3                       | 166   | 175 |                                       | N1:Ammonia-loss (N):9.34                                                              | PEAKS PTM |
| R.EQWEEEEEEEEEGSNREVR.R                                | N    | 49.84  | 2665.0535 | 21     | 2.4  | 889.3605  | 3 | 27.88 | 41       | F41:1353 | OB5954 H1 Ro.raw  | 4.9786E4            | 1        | 1                       | 473   | 493 |                                       |                                                                                       | PEAKS DB  |
| T.GNLELVAVRK.E                                         | N    | 49.53  | 1097.6556 | 10     | 0.5  | 549.8354  | 2 | 27.00 | 42       | F42:1296 | OB5955 H1 Ro.raw  | 3.4872E5            | 3        | 3                       | 455   | 464 |                                       |                                                                                       | PEAKS DB  |
| R.VAKIS(+77.99)MPVNTPGQFEDFFPASSR.D                    | N    | 49.16  | 2602.2290 | 23     | 3.0  | 1302.1257 | 2 | 38.06 | 42       | F42:1958 | OB5955 H1 Ro.raw  | 0                   | 0        | 0                       | 279   | 301 | Methylphosphorylation                 | S5:Methylphosphorylation:56.99                                                        | PEAKS PTM |
| F.PGSGEQVEK.L                                          | N    | 49.06  | 929.4454  | 9      | -3.7 | 465.7282  | 2 | 30.34 | 43       | F43:1524 | OB5956 H1 Ro.raw  | 5.2705E4            | 1        | 1                       | 559   | 567 |                                       |                                                                                       | PEAKS DB  |
| K.AMVIVVVK(+57.02)GTGNLELVAVRK.E                       | N    | 48.92  | 2266.3196 | 21     | 1.3  | 756.4481  | 3 | 33.23 | 43       | F43:1673 | OB5956 H1 Ro.raw  | 3.1193E6            | 1        | 1                       | 444   | 464 |                                       | K9:Carbamidomethylation (DHKE, X@N-term):8.78                                         | PEAKS PTM |
| R.EEDWRQPR.E                                           | N    | 48.87  | 1114.5155 | 8      | 1.8  | 558.2661  | 2 | 23.91 | 41       | F41:1112 | OB5954 H1 Ro.raw  | 1.6791E3            | 1        | 1                       | 120   | 127 |                                       |                                                                                       | PEAKS DB  |
| R.PNTLVLPK.H                                           | N    | 48.84  | 880.5382  | 8      | -2.9 | 441.2751  | 2 | 28.00 | 43       | F43:1374 | OB5956 H1 Ro.raw  | 1.9234E5            | 2        | 2                       | 215   | 222 |                                       |                                                                                       | PEAKS DB  |
| L.R(+27.99)IPSGFISYILNR.H                              | N    | 48.25  | 1562.8568 | 13     | -2.0 | 782.4341  | 2 | 37.84 | 43       | F43:1976 | OB5956 H1 Ro.raw  | 1.5108E5            | 1        | 1                       | 259   | 271 | Formylation                           | R1:Formylation:1000.00                                                                | PEAKS PTM |
| R.EGEQEW(+15.99)GTPGSEVREETSR.N                        | Y    | 48.10  | 2177.9460 | 19     | 1.6  | 726.9905  | 3 | 26.51 | 43       | F43:1296 | OB5956 H1 Ro.raw  | 8.9341E6            | 3        | 3                       | 147   | 165 | Oxidation (HW)                        | W6:Oxidation (HW):1000.00                                                             | PEAKS PTM |
| R.I(+57.02)VQIEARPNTLVLPK.H                            | Y    | 46.89  | 1747.0355 | 15     | -0.2 | 874.5248  | 2 | 30.98 | 42       | F42:1537 | OB5955 H1 Ro.raw  | 9.1688E5            | 3        | 3                       | 208   | 222 | Carbamidomethylation (DHKE, X@N-term) | I1:Carbamidomethylation (DHKE, X@N-term):69.71                                        | PEAKS PTM |
| total 244 peptides                                     |      |        |           |        |      |           |   |       |          |          |                   |                     |          |                         |       |     |                                       |                                                                                       |           |

| Peptide                                                   | Uniq | -10lgP | Mass      | Length | ppm  | m/z       | z | RT    | Fraction | Scan     | Source File      | Area Roasted in gel | #Feature | #Feature Roasted in gel | Start | End | PTM                                       | AScore                                                                                 | Found By  |
|-----------------------------------------------------------|------|--------|-----------|--------|------|-----------|---|-------|----------|----------|------------------|---------------------|----------|-------------------------|-------|-----|-------------------------------------------|----------------------------------------------------------------------------------------|-----------|
| R.N(+.98)TLEAFNAEFNEIR.R                                  | N    | 46.63  | 1738.8162 | 15     | 9.2  | 870.4233  | 2 | 44.36 | 42       | F42:2303 | OB5955 H1 Ro.raw | 5.4416E3            | 1        | 1                       | 313   | 327 | Deamidation (NQ)                          | N1:Deamidation (NQ):39.47                                                              | PEAKS DB  |
| R.VLLE(+21.98)ENAGGEQEER.G                                | N    | 46.37  | 1593.7246 | 14     | -1.1 | 797.8687  | 2 | 26.71 | 43       | F43:1300 | OB5956 H1 Ro.raw | 4.0134E5            | 3        | 3                       | 329   | 342 | Sodium adduct                             | E4:Sodium adduct:40.00                                                                 | PEAKS PTM |
| N.PFYFPSR.R                                               | N    | 46.32  | 912.4493  | 7      | -0.1 | 457.2319  | 2 | 31.70 | 42       | F42:1584 | OB5955 H1 Ro.raw | 2.4653E5            | 4        | 4                       | 168   | 174 |                                           |                                                                                        | PEAKS DB  |
| K.GTGNLELVAVRKEQQQR.G                                     | N    | 46.31  | 1925.0442 | 17     | 1.4  | 642.6896  | 3 | 26.67 | 43       | F43:1294 | OB5956 H1 Ro.raw | 2.1018E4            | 1        | 1                       | 453   | 469 |                                           |                                                                                        | PEAKS DB  |
| K.NPQLQDLD(+14.02)MMLTC(+57.02)VEIK.E                     | N    | 45.99  | 2060.9944 | 17     | 0.2  | 1031.5046 | 2 | 37.33 | 41       | F41:1934 | OB5954 H1 Ro.raw | 2.7407E4            | 1        | 1                       | 415   | 431 | Methylation(others); Carbamidomethylation | D8:Methylation(others):42.68; C13:Carbamidomethylation:1000.00                         | PEAKS PTM |
| K.GTGNLE(+57.02)LVAVRK.E                                  | N    | 45.75  | 1312.7462 | 12     | -0.8 | 657.3799  | 2 | 27.17 | 42       | F42:1295 | OB5955 H1 Ro.raw | 1.9882E5            | 1        | 1                       | 453   | 464 |                                           | E6:Carbamidomethylation (DHKE, X@N-term):0.00                                          | PEAKS PTM |
| K.A(+43.01)MVIVVVKGTGNLELVAVR.K                           | N    | 45.64  | 2124.2090 | 20     | 0.7  | 1063.1125 | 2 | 33.65 | 41       | F41:1688 | OB5954 H1 Ro.raw | 8.0739E4            | 1        | 1                       | 444   | 463 | Carbamylation                             | A1:Carbamylation:161.20                                                                | PEAKS PTM |
| R.VLLEEN(+.98)AGGEQEERGQR.R                               | N    | 45.60  | 1913.9078 | 17     | -1.6 | 638.9755  | 3 | 25.99 | 41       | F41:1234 | OB5954 H1 Ro.raw | 0                   | 0        | 0                       | 329   | 345 | Deamidation (NQ)                          | N6:Deamidation (NQ):28.79                                                              | PEAKS DB  |
| K.KNPQLQDLDM(+15.99)LTC(+57.02)VEIKEGALM(+15.99)LPHFNSK.A | N    | 45.45  | 3531.7234 | 30     | -1.1 | 883.9372  | 4 | 35.80 | 42       | F42:1822 | OB5955 H1 Ro.raw | 0                   | 0        | 0                       | 414   | 443 | Carbamidomethylation; Oxidation (M)       | M11:Oxidation (M):0.00;C14:Carbamidomethylation:1000.00;M23:Oxidation (M):45.87        | PEAKS DB  |
| R.LFEVKPKKNPQLQDLDM(+15.99)M(+15.99)LTC(+57.02)VEIK.E     | N    | 45.43  | 3163.5967 | 26     | -2.8 | 791.9042  | 4 | 32.90 | 41       | F41:1650 | OB5954 H1 Ro.raw | 2.0535E6            | 3        | 3                       | 406   | 431 | Oxidation (M); Carbamidomethylation       | M18:Oxidation (M):1000.00; M19:Oxidation (M):1000.00; C22:Carbamidomethylation:1000.00 | PEAKS DB  |
| R.KSFNLDEGH(+15.99)ALR.I                                  | N    | 45.40  | 1401.7001 | 12     | 3.9  | 701.8600  | 2 | 27.64 | 43       | F43:1349 | OB5956 H1 Ro.raw | 6.6479E4            | 2        | 2                       | 248   | 259 | Oxidation (HW)                            | H9:Oxidation (HW):1000.00                                                              | PEAKS PTM |
| K.KNPQLQDLDM(+15.99)MLTC(+57.02)VEIKEGALMLPHFNSK.A        | N    | 44.60  | 3515.7285 | 30     | -1.9 | 879.9377  | 4 | 35.30 | 41       | F41:1798 | OB5954 H1 Ro.raw | 6.4162E5            | 1        | 1                       | 414   | 443 | Carbamidomethylation                      | M10:Oxidation (M):14.02;C14:Carbamidomethylation:1000.00                               | PEAKS DB  |
| R.DQSSYLQGFSR(+15.99).N                                   | N    | 44.15  | 1302.5840 | 11     | 2.5  | 652.3009  | 2 | 30.79 | 43       | F43:1544 | OB5956 H1 Ro.raw | 1.4308E5            | 3        | 3                       | 302   | 312 | Oxidation or Hydroxylation                | R11:Oxidation or Hydroxylation:42.88                                                   | PEAKS PTM |
| K.Q(+.98)FQNLQNHR.I                                       | N    | 43.70  | 1184.5686 | 9      | 4.6  | 593.2943  | 2 | 23.68 | 42       | F42:1098 | OB5955 H1 Ro.raw | 0                   | 0        | 0                       | 199   | 207 | Deamidation (NQ)                          | Q1:Deamidation (NQ):39.25                                                              | PEAKS DB  |
| K.I(+57.02)SMPVNTPGQFEDFFPASSR.D                          | N    | 42.37  | 2283.0630 | 20     | -0.7 | 1142.5380 | 2 | 36.01 | 43       | F43:1860 | OB5956 H1 Ro.raw | 1.8515E5            | 1        | 1                       | 282   | 301 | Carbamidomethylation (DHKE, X@N-term)     | I1:Carbamidomethylation (DHKE, X@N-term):50.99                                         | PEAKS PTM |
| total 244 peptides                                        |      |        |           |        |      |           |   |       |          |          |                  |                     |          |                         |       |     |                                           |                                                                                        |           |



| Peptide                                                         | Uniq | -10lgP | Mass      | Length | ppm  | m/z       | z | RT    | Fraction | Scan     | Source File       | Area Roasted in gel | #Feature | #Feature Roasted in gel | Start | End | PTM                                                   | AScore                                                                                                     | Found By  |
|-----------------------------------------------------------------|------|--------|-----------|--------|------|-----------|---|-------|----------|----------|-------------------|---------------------|----------|-------------------------|-------|-----|-------------------------------------------------------|------------------------------------------------------------------------------------------------------------|-----------|
| K.ISM(-48.00)PVNTPGQGFEDFFPASSR.D                               | N    | 42.09  | 2178.0381 | 20     | 2.8  | 727.0220  | 3 | 32.48 | 43       | F43:1652 | OB5956 H1 Ro.raw  | 5.8583E6            | 3        | 3                       | 282   | 301 | Dethiomethyl                                          | M3:Dethio methyl:1000.00                                                                                   | PEAKS PTM |
| R.SKQFQNLQNH(+15.99)R.I                                         | Y    | 41.84  | 1414.7065 | 11     | 2.4  | 708.3622  | 2 | 24.12 | 42       | F42:1124 | OB5955 H1 Ro.raw  | 1.2986E3            | 1        | 1                       | 197   | 207 | Oxidation (HW)                                        | H10:Oxidation (H W):1000.00                                                                                | PEAKS PTM |
| K.KGSEEEEDIT(-18.01)N(+.98)PINLR.D                              | N    | 41.27  | 1696.8268 | 15     | 2.3  | 566.6175  | 3 | 29.07 | 43       | F43:1442 | OB5956 H1 Ro.raw  | 3.8118E5            | 3        | 3                       | 379   | 393 | Dehydration; Deamidation (NQ)                         | T9:Dehydration:45.01;N10:Deamidation (NQ):59.10                                                            | PEAKS PTM |
| K.NPQLQDLDM(+15.99)LTC(+57.02)VEIKEGALM(+15.99)LPHFN(+.98)SK.A  | N    | 41.25  | 3404.6125 | 29     | -0.4 | 1135.8777 | 3 | 36.69 | 42       | F42:1878 | OB5955 H1 Ro.raw  | 3.8423E5            | 1        | 1                       | 415   | 443 | Carbamidomethylation; Oxidation (M); Deamidation (NQ) | M10:Oxidation (M):0.00;C13:Carbamidomethylation:1000.00;M22:Oxidation (M):39.23;N27:Deamidation (NQ):69.52 | PEAKS DB  |
| R.REQEW(+15.99)EEEEEEEEEGSNR.E                                  | N    | 41.18  | 2452.9375 | 19     | -0.6 | 818.6526  | 3 | 25.98 | 41       | F41:1239 | OB5954 H1 Ro.raw  | 2.4114E4            | 1        | 1                       | 472   | 490 | Oxidation (HW)                                        | W5:Oxidation (H W):1000.00                                                                                 | PEAKS PTM |
| K.DLAFP(+15.99)GSGEQVEK.L                                       | N    | 41.14  | 1391.6569 | 13     | 0.5  | 696.8361  | 2 | 29.36 | 42       | F42:1432 | OB5955 H1 Ro.raw  | 7.4528E5            | 3        | 3                       | 555   | 567 | Oxidation or Hydroxylation                            | P5:Oxidation or Hydroxylation:67.76                                                                        | PEAKS PTM |
| K.AMVVVVN(+.98)KGTGNLELVAVRK.E                                  | N    | 41.03  | 2210.2820 | 21     | 1.9  | 1106.1504 | 2 | 34.35 | 42       | F42:1720 | OB5955 H1 Ro.raw  | 4.5718E5            | 1        | 1                       | 444   | 464 | Deamidation (NQ)                                      | N8:Deamidation (N Q):28.79                                                                                 | PEAKS DB  |
| K.EGALM(-48.00)LPHFNFSK.A                                       | N    | 40.53  | 1294.6670 | 12     | 0.5  | 432.5632  | 3 | 28.76 | 41       | F41:1389 | OB5954 H1 Ro.raw  | 2.208E6             | 2        | 2                       | 432   | 443 | Dethiomethyl                                          | M5:Dethio methyl:1000.00                                                                                   | PEAKS PTM |
| R.VLLEENAGGEQEERGQRR.R                                          | N    | 40.17  | 2069.0249 | 18     | 1.0  | 518.2640  | 4 | 25.49 | 42       | F42:1205 | OB5955 H1 Ro.raw  | 2.0305E5            | 2        | 2                       | 329   | 346 |                                                       |                                                                                                            | PEAKS DB  |
| R.VLLEENAGGEQEER(+15.99).G                                      | N    | 39.98  | 1587.7375 | 14     | 1.8  | 794.8775  | 2 | 26.70 | 41       | F41:1275 | OB5954 H1 Ro.raw  | 0                   | 0        | 0                       | 329   | 342 | Oxidation or Hydroxylation                            | R14:Oxidation or Hydroxylation:20.88                                                                       | PEAKS PTM |
| R.N(+27.99)TLEAAFNAEFNEIRR.V                                    | N    | 39.68  | 1921.9282 | 16     | -1.7 | 961.9697  | 2 | 37.51 | 41       | F41:1908 | OB5954 H1 Ro.raw  | 3.7767E4            | 1        | 1                       | 313   | 328 | Formylation                                           | N1:Formylation:1000.00                                                                                     | PEAKS PTM |
| K.E(-18.01)GALM(+15.99)LPHFNFSK.A                               | N    | 39.64  | 1340.6547 | 12     | 0.2  | 447.8923  | 3 | 30.21 | 41       | F41:1479 | OB5954 H1 Ro.raw  | 7.81E5              | 1        | 1                       | 432   | 443 | Pyro-glu from E; Oxidation (M)                        | E1:Pyro-glu from E:1000.00; M5:Oxidation (M):1000.00                                                       | PEAKS PTM |
| R.VLLEE(+53.92)NAGGEQEER.G                                      | N    | 39.58  | 1625.6620 | 14     | -1.0 | 542.8940  | 3 | 26.76 | 42       | F42:1278 | OB5955 H1 Ro.raw  | 0                   | 0        | 0                       | 329   | 342 | Replacement of 2 protons by iron                      | E5:Replacement of 2 protons by iron:20.92                                                                  | PEAKS PTM |
| D.GEPDLSNNFGR.L                                                 | N    | 39.46  | 1204.5472 | 11     | 3.0  | 603.2827  | 2 | 28.20 | 41       | F41:1371 | OB5954 H1 Ro.raw  | 1.5511E4            | 1        | 1                       | 395   | 405 |                                                       |                                                                                                            | PEAKS DB  |
| K.HADADNIIQQGQ(+.98)ATVTVANGNNRK.S                              | N    | 39.33  | 2747.3950 | 26     | 2.6  | 916.8103  | 3 | 30.46 | 30       | F30:1280 | OB5926 H3B Ro.raw | 0                   | 0        | 0                       | 223   | 248 |                                                       | Q14:Deamidation (NQ):5.07                                                                                  | PEAKS DB  |
| K.NPQLQ(+.98)DLDM(+15.99)LTC(+57.02)VEIKEGALM(+15.99)LPHFNFSK.A | N    | 39.15  | 3404.6125 | 29     | -1.8 | 852.1589  | 4 | 38.22 | 43       | F43:1993 | OB5956 H1 Ro.raw  | 7.6266E5            | 1        | 1                       | 415   | 443 | Deamidation (NQ); Carbamidomethylation                | Q5:Deamidation (N Q):49.79; M10:Oxidation (M):0.00;C13:                                                    | PEAKS DB  |
| total 244 peptides                                              |      |        |           |        |      |           |   |       |          |          |                   |                     |          |                         |       |     |                                                       |                                                                                                            |           |

| Peptide                                                 | Uniq | -10lgP | Mass      | Length | ppm  | m/z       | z | RT    | Fraction | Scan     | Source File      | Area Roasted in gel | #Feature | #Feature Roasted in gel | Start | End | PTM                               | AScore                                                                          | Found By  |
|---------------------------------------------------------|------|--------|-----------|--------|------|-----------|---|-------|----------|----------|------------------|---------------------|----------|-------------------------|-------|-----|-----------------------------------|---------------------------------------------------------------------------------|-----------|
|                                                         |      |        |           |        |      |           |   |       |          |          |                  |                     |          |                         |       |     |                                   | Carbamidomethylation:1000.00;M22:Oxidation (M):14.60                            |           |
| K.N(+.98)PQLQDLDM(+15.99)MLTC(+57.02)VEIKEGALMLPHFNSK.A | N    | 38.83  | 3388.6174 | 29     | 8.2  | 1695.3300 | 2 | 37.72 | 41       | F41:1941 | OB5954 H1 Ro.raw | 6.4698E5            | 1        | 1                       | 415   | 443 | Carbamidomethylation              | N1:Deamidation (NQ):0.00;M9:Oxidation (M):0.00;C13:Carbamidomethylation:1000.00 | PEAKS DB  |
| K.D(+15.99)LAFPGSGEQVEK.L                               | N    | 38.81  | 1391.6569 | 13     | 0.5  | 696.8361  | 2 | 29.36 | 42       | F42:1368 | OB5955 H1 Ro.raw | 2.5725E5            | 1        | 1                       | 555   | 567 | Oxidation or Hydroxylation        | D1:Oxidation or Hydroxylation:77.13                                             | PEAKS PTM |
| K.NPQ(+.98)LQDLDMMLTC(+57.02)VEIK.E                     | N    | 38.70  | 2047.9629 | 17     | 2.9  | 1024.9917 | 2 | 46.45 | 41       | F41:2441 | OB5954 H1 Ro.raw | 0                   | 0        | 0                       | 415   | 431 | Carbamidomethylation              | Q3:Deamidation (NQ):14.04;C13:Carbamidomethylation:1000.00                      | PEAKS DB  |
| R.IFLAGD(+15.99)KDNVIDQIEK.Q                            | N    | 38.52  | 1832.9519 | 16     | 1.9  | 917.4850  | 2 | 31.89 | 42       | F42:1590 | OB5955 H1 Ro.raw | 4.6198E5            | 1        | 1                       | 536   | 551 |                                   | D6:Oxidation or Hydroxylation:12.60                                             | PEAKS PTM |
| R.IFLAGDKDN(+.98)VIDQIEKQ(+.98)AK.D                     | N    | 37.85  | 2146.1157 | 19     | 9.8  | 716.3862  | 3 | 32.98 | 42       | F42:1661 | OB5955 H1 Ro.raw | 8.6625E4            | 1        | 1                       | 536   | 554 |                                   | N9:Deamidation (NQ):13.83;Q17:Deamidation (NQ):17.65                            | PEAKS DB  |
| K.DLAFPGSGE(+53.92)QVEK.L                               | N    | 37.31  | 1429.5812 | 13     | -6.3 | 715.7933  | 2 | 30.34 | 43       | F43:1518 | OB5956 H1 Ro.raw | 2.6492E5            | 1        | 1                       | 555   | 567 | Replacement of 2 protons by iron  | E9:Replacement of 2 protons by iron:37.54                                       | PEAKS PTM |
| R.W(+15.99)GPAEPR.E                                     | Y    | 36.73  | 827.3926  | 7      | 0.0  | 414.7036  | 2 | 24.54 | 42       | F42:1155 | OB5955 H1 Ro.raw | 3.7087E3            | 1        | 1                       | 109   | 115 | Oxidation (HW)                    | W1:Oxidation (HW):1000.00                                                       | PEAKS PTM |
| K.GT(-18.01)GNLELVAVRK.E                                | N    | 36.73  | 1237.7142 | 12     | 2.6  | 413.5797  | 3 | 27.00 | 42       | F42:1287 | OB5955 H1 Ro.raw | 4.7714E5            | 1        | 1                       | 453   | 464 | Dehydration                       | T2:Dehydration:1000.00                                                          | PEAKS PTM |
| K.IRPEGREGGEQEWGTPGSEVREETSR.N                          | Y    | 36.52  | 2870.3542 | 25     | 2.3  | 718.5975  | 4 | 27.83 | 43       | F43:1355 | OB5956 H1 Ro.raw | 1.3647E5            | 1        | 1                       | 141   | 165 |                                   |                                                                                 | PEAKS DB  |
| R.NT(-18.01)LEAAFAAEFNEIRR.V                            | N    | 36.45  | 1875.9227 | 16     | 0.7  | 626.3153  | 3 | 34.16 | 43       | F43:1739 | OB5956 H1 Ro.raw | 6.9172E6            | 2        | 2                       | 313   | 328 | Dehydration                       | T2:Dehydration:1000.00                                                          | PEAKS PTM |
| K.EGALM(+15.99)LPHFN(+.98)SK.A                          | N    | 36.41  | 1359.6493 | 12     | 2.8  | 680.8338  | 2 | 31.22 | 41       | F41:1550 | OB5954 H1 Ro.raw | 0                   | 0        | 0                       | 432   | 443 | Oxidation (M); Deamidation (NQ)   | M5:Oxidation (M):1000.00;N10:Deamidation (NQ):1000.00                           | PEAKS DB  |
| R.DQSSY(-18.01)LQGFSR.N                                 | N    | 36.32  | 1268.5785 | 11     | -0.6 | 635.2961  | 2 | 30.85 | 43       | F43:1579 | OB5956 H1 Ro.raw | 2.378E5             | 1        | 1                       | 302   | 312 |                                   | Y5:Dehydration:0.00                                                             | PEAKS PTM |
| R.C(+57.02)LQS(-18.01)C(+57.02)Q(+.98)QEPDDLKQK.A       | N    | 36.24  | 1858.8190 | 15     | -0.1 | 930.4167  | 2 | 28.47 | 31       | F31:1350 | OB5942 H6 Ro.raw | 0                   | 0        | 0                       | 40    | 54  | Carbamidomethylation; Dehydration | C1:Carbamidomethylation:1000.00;S4:Dehydration:39.55;C5:Carbamidomethylation:10 | PEAKS PTM |
| total 244 peptides                                      |      |        |           |        |      |           |   |       |          |          |                  |                     |          |                         |       |     |                                   |                                                                                 |           |

| Peptide                                                 | Uniq | -10lgP | Mass      | Length | ppm  | m/z       | z | RT    | Fraction | Scan     | Source File      | Area Roasted in gel | #Feature | #Feature Roasted in gel | Start | End | PTM                  | AScore                                                                               | Found By  |
|---------------------------------------------------------|------|--------|-----------|--------|------|-----------|---|-------|----------|----------|------------------|---------------------|----------|-------------------------|-------|-----|----------------------|--------------------------------------------------------------------------------------|-----------|
|                                                         |      |        |           |        |      |           |   |       |          |          |                  |                     |          |                         |       |     |                      | 00.00;Q6: Deamidation (NQ): 8.69                                                     |           |
| M.LPHFNSK.A                                             | N    | 36.02  | 841.4446  | 7      | 1.3  | 421.7301  | 2 | 30.63 | 42       | F42:1510 | OB5955 H1 Ro.raw | 1.4673E6            | 2        | 2                       | 437   | 443 |                      |                                                                                      | PEAKS DB  |
| K.NPQLQLDLM(-48.00)MLTC(+57.02)VEIK.E                   | N    | 35.81  | 1998.9755 | 17     | 6.7  | 667.3369  | 3 | 34.52 | 43       | F43:1773 | OB5956 H1 Ro.raw | 8.4276E5            | 1        | 1                       | 415   | 431 | Carbamidomethylation | M9:Dethio methyl:1 1.06;C13: Carbamidomethylation:1000.00                            | PEAKS PTM |
| K.SF(+17.99)NLDEGHALR.I                                 | N    | 34.75  | 1275.6007 | 11     | 8.1  | 638.8128  | 2 | 26.62 | 42       | F42:1267 | OB5955 H1 Ro.raw | 9.5828E3            | 1        | 1                       | 249   | 259 | Fluorination         | F2:Fluorination:100 0.00                                                             | PEAKS PTM |
| K.KNPQLQ(+.98)DLDM(+15.99)LTC(+57.02)VEIKEGALMLPHFNSK.A | N    | 33.72  | 3516.7124 | 30     | 3.3  | 880.1883  | 4 | 35.48 | 41       | F41:1798 | OB5954 H1 Ro.raw | 7.5658E5            | 1        | 1                       | 414   | 443 | Carbamidomethylation | Q6:Deamidation (NQ):18.55; M11:Oxidation (M): 14.02;C14:Carbamidomethylation:1000.00 | PEAKS DB  |
| K.VSKEH(+15.99)VQELTK.H                                 | N    | 33.71  | 1312.6986 | 11     | 1.8  | 657.3578  | 2 | 23.73 | 42       | F42:1100 | OB5955 H1 Ro.raw | 1.3581E3            | 1        | 1                       | 361   | 371 | Oxidation (HW)       | H5:Oxidation (HW): 1000.00                                                           | PEAKS PTM |
| D.QSSYLQGFSR.N                                          | N    | 33.26  | 1171.5621 | 10     | 2.1  | 586.7896  | 2 | 29.36 | 42       | F42:1431 | OB5955 H1 Ro.raw | 3.3134E4            | 1        | 1                       | 303   | 312 |                      |                                                                                      | PEAKS DB  |
| R.IFLAGDKDNVID(-18.01)QIEK.Q                            | N    | 33.09  | 1798.9464 | 16     | 0.7  | 900.4811  | 2 | 31.39 | 43       | F43:1591 | OB5956 H1 Ro.raw | 6.7846E4            | 1        | 1                       | 536   | 551 |                      | D12:Dehydration:1 3.16                                                               | PEAKS PTM |
| R.EREEDWRQPR.E                                          | N    | 32.92  | 1399.6592 | 10     | 5.7  | 700.8409  | 2 | 24.05 | 43       | F43:1141 | OB5956 H1 Ro.raw | 4.1173E4            | 1        | 1                       | 118   | 127 |                      |                                                                                      | PEAKS DB  |
| D.NVIDQIEK.Q                                            | N    | 32.64  | 957.5131  | 8      | 1.6  | 479.7646  | 2 | 28.19 | 42       | F42:1367 | OB5955 H1 Ro.raw | 3.0062E3            | 1        | 1                       | 544   | 551 |                      |                                                                                      | PEAKS DB  |
| K.AM(-48.00)VIVVVNK.G                                   | N    | 32.49  | 923.5804  | 9      | 0.0  | 462.7975  | 2 | 25.00 | 43       | F43:1192 | OB5956 H1 Ro.raw | 6.3177E3            | 1        | 1                       | 444   | 452 | Dethiomethyl         | M2:Dethio methyl:10 00.00                                                            | PEAKS PTM |
| R.D(-18.01)QSSYLQGFSR.N                                 | N    | 31.95  | 1268.5785 | 11     | 1.6  | 635.2975  | 2 | 29.92 | 43       | F43:1489 | OB5956 H1 Ro.raw | 0                   | 0        | 0                       | 302   | 312 |                      | D1:Dehydration:0.0 0                                                                 | PEAKS PTM |
| R.IFLAGDKD(-18.01)NVIDQIEK.Q                            | N    | 31.82  | 1798.9464 | 16     | -0.9 | 600.6555  | 3 | 32.15 | 43       | F43:1589 | OB5956 H1 Ro.raw | 3.5634E5            | 1        | 1                       | 536   | 551 | Dehydration          | D8:Dehydration:30. 83                                                                | PEAKS PTM |
| K.D(+53.92)LAPPGSGEQVEK.L                               | N    | 31.27  | 1429.5812 | 13     | -4.3 | 715.7948  | 2 | 30.56 | 41       | F41:1500 | OB5954 H1 Ro.raw | 3.7719E5            | 1        | 1                       | 555   | 567 |                      | D1:Replacement of 2 protons by iron:0. 00                                            | PEAKS PTM |
| K.SFNLDE(+53.92)GHALR.I                                 | N    | 31.27  | 1311.5294 | 11     | 1.0  | 438.1842  | 3 | 28.04 | 41       | F41:1362 | OB5954 H1 Ro.raw | 5.8053E4            | 1        | 1                       | 249   | 259 |                      | E6:Replacement of 2 protons by iron:1 6.90                                           | PEAKS PTM |
| K.AM(+15.99)VIVVVNK(+57.02)GTGNLELVAVR.K                | N    | 30.97  | 2154.2195 | 20     | 2.8  | 1078.1200 | 2 | 32.98 | 42       | F42:1664 | OB5955 H1 Ro.raw | 2.0029E5            | 1        | 1                       | 444   | 463 | Oxidation (M)        | M2:Oxidation (M):1 000.00;K 9:Carbamidomethylation (DHK E, X@N-term):0.00            | PEAKS PTM |
| K.KNPQLQLDMM(+15.99)LTC(+57.02)VEIKEGALMLPHFNSK.A       | N    | 30.83  | 3515.7285 | 30     | 1.3  | 879.9406  | 4 | 35.25 | 42       | F42:1790 | OB5955 H1 Ro.raw | 0                   | 0        | 0                       | 414   | 443 | Carbamidomethylation | M11:Oxidation (M): 12.28;C1                                                          | PEAKS DB  |
| total 244 peptides                                      |      |        |           |        |      |           |   |       |          |          |                  |                     |          |                         |       |     |                      |                                                                                      |           |

| Peptide                                                                | Uniq | -10lgP | Mass      | Length | ppm  | m/z      | z | RT    | Fraction | Scan     | Source File       | Area Roasted in gel | #Feature | #Feature Roasted in gel | Start | End | PTM                                 | AScore                                                                                                             | Found By  |
|------------------------------------------------------------------------|------|--------|-----------|--------|------|----------|---|-------|----------|----------|-------------------|---------------------|----------|-------------------------|-------|-----|-------------------------------------|--------------------------------------------------------------------------------------------------------------------|-----------|
|                                                                        |      |        |           |        |      |          |   |       |          |          |                   |                     |          |                         |       |     |                                     | 4:Carbamidomethylation:1000.00                                                                                     |           |
| R.DQSSY(+15.99)LQGFSR.N                                                | N    | 30.72  | 1302.5840 | 11     | 1.6  | 652.3003 | 2 | 29.24 | 43       | F43:1470 | OB5956 H1 Ro.raw  | 6.7205E4            | 1        | 1                       | 302   | 312 | Oxidation or Hydroxylation          | Y5:Oxidation or Hydroxylation:26.36                                                                                | PEAKS PTM |
| K.SFNLDEGHALRIPSGFISYILNRHDNQ(+.98)LR.V                                | N    | 30.43  | 3496.7600 | 30     | 4.9  | 700.3627 | 5 | 37.51 | 39       | F39:1925 | OB5952 H3A Ro.raw | 2.7478E5            | 1        | 1                       | 249   | 278 |                                     | N28:Deamidation (NQ):10.11                                                                                         | PEAKS DB  |
| D.KDNVIDQIEK.Q                                                         | N    | 30.42  | 1200.6350 | 10     | -0.3 | 601.3246 | 2 | 26.31 | 42       | F42:1252 | OB5955 H1 Ro.raw  | 0                   | 0        | 0                       | 542   | 551 |                                     |                                                                                                                    | PEAKS DB  |
| N.TLEAAFNAEFNEIRR.V                                                    | N    | 30.42  | 1779.8904 | 15     | 3.5  | 890.9556 | 2 | 33.23 | 43       | F43:1696 | OB5956 H1 Ro.raw  | 1.5374E5            | 1        | 1                       | 314   | 328 |                                     |                                                                                                                    | PEAKS DB  |
| R.IPSGFISYILN(+15.99)R.H                                               | N    | 30.30  | 1394.7557 | 12     | -2.8 | 698.3832 | 2 | 36.42 | 41       | F41:1875 | OB5954 H1 Ro.raw  | 3.8045E5            | 1        | 1                       | 260   | 271 |                                     | N11:Oxidation or Hydroxylation:0.00                                                                                | PEAKS PTM |
| W.GTPGSEVREETSR.N                                                      | Y    | 30.01  | 1403.6641 | 13     | 3.8  | 702.8420 | 2 | 27.77 | 42       | F42:1332 | OB5955 H1 Ro.raw  | 2.719E4             | 1        | 1                       | 153   | 165 |                                     |                                                                                                                    | PEAKS DB  |
| R.IFLAGDKD(-18.01)NV.I                                                 | N    | 30.00  | 1072.5553 | 10     | 0.7  | 537.2853 | 2 | 32.26 | 42       | F42:1603 | OB5955 H1 Ro.raw  | 2.1452E6            | 1        | 1                       | 536   | 545 | Dehydration                         | D8:Dehydration:45.01                                                                                               | PEAKS PTM |
| R.NTLEAAFNAEFN(+15.99)EIRR.V                                           | N    | 29.99  | 1909.9282 | 16     | 0.9  | 955.9723 | 2 | 32.98 | 42       | F42:1662 | OB5955 H1 Ro.raw  | 2.366E6             | 2        | 2                       | 313   | 328 |                                     | N12:Oxidation or Hydroxylation:0.00                                                                                | PEAKS PTM |
| R.IFLAGDKDNVIDQ(+.98)IEK.Q                                             | N    | 29.73  | 1817.9410 | 16     | 7.7  | 909.9848 | 2 | 63.08 | 43       | F43:3435 | OB5956 H1 Ro.raw  | 3.1606E3            | 1        | 1                       | 536   | 551 |                                     | Q13:Deamidation (NQ):11.12                                                                                         | PEAKS DB  |
| I.F(+127.06)LAGDKDNVIDQIEK.Q                                           | N    | 29.59  | 1830.9363 | 15     | 0.7  | 916.4761 | 2 | 32.18 | 41       | F41:1600 | OB5954 H1 Ro.raw  | 6.5822E4            | 1        | 1                       | 537   | 551 | N-Succinimidyl-2-morpholine acetate | F1:N-Succinimidyl-2-morpholine acetate:28.79                                                                       | PEAKS PTM |
| K.N(+.98)PQLQ(+.98)DLDMMLTC(+57.02)VEIKEGALM(+15.99)LPHFNSK.A          | N    | 29.50  | 3389.6016 | 29     | 9.6  | 848.4158 | 4 | 37.65 | 43       | F43:2047 | OB5956 H1 Ro.raw  | 6.1505E6            | 1        | 1                       | 415   | 443 | Carbamidomethylation                | N1:Deamidation (NQ):0.00;Q5:Deamidation (NQ):14.04;C13:Carbamidomethylation:1000.00;M22:Oxidation (M):0.00         | PEAKS DB  |
| R.NN(+.98)PFYFPSRR.F                                                   | N    | 29.19  | 1297.6204 | 10     | 9.3  | 649.8235 | 2 | 62.71 | 43       | F43:3425 | OB5956 H1 Ro.raw  | 0                   | 0        | 0                       | 166   | 175 |                                     | N2:Deamidation (NQ):7.21                                                                                           | PEAKS DB  |
| R.NTLEAAFNAEFN(+.98)EIR.R                                              | N    | 29.07  | 1738.8162 | 15     | 9.2  | 870.4233 | 2 | 44.36 | 42       | F42:2331 | OB5955 H1 Ro.raw  | 5.4416E3            | 1        | 1                       | 313   | 327 |                                     | N12:Deamidation (NQ):0.00                                                                                          | PEAKS DB  |
| K.KNPQ(+.98)LQ(+.98)DLDMM(+15.99)LTC(+57.02)VEIKEGALM(+15.99)LPHFNSK.A | N    | 28.74  | 3533.6914 | 30     | 9.7  | 884.4387 | 4 | 35.77 | 42       | F42:1822 | OB5955 H1 Ro.raw  | 2.7541E5            | 1        | 1                       | 414   | 443 | Carbamidomethylation; Oxidation (M) | Q4:Deamidation (NQ):8.22;Q6:Deamidation (NQ):5.55;M11:Oxidation (M):0.00;C14:C carbamidomethylation:1000.00;M23:Ox | PEAKS DB  |

total 244 peptides

| Peptide            | Uniq | -10lgP | Mass | Length | ppm | m/z | z | RT | Fraction | Scan | Source File | Area Roasted in gel | #Feature | #Feature Roasted in gel | Start | End | PTM | AScore            | Found By |
|--------------------|------|--------|------|--------|-----|-----|---|----|----------|------|-------------|---------------------|----------|-------------------------|-------|-----|-----|-------------------|----------|
|                    |      |        |      |        |     |     |   |    |          |      |             |                     |          |                         |       |     |     | idation (M):38.29 |          |
| total 244 peptides |      |        |      |        |     |     |   |    |          |      |             |                     |          |                         |       |     |     |                   |          |

B3IXL2|B3IXL2\_ARAHY

back to list

| [Protein Coverage](#) | [Supporting Peptides](#) |

Protein Coverage:



## Supporting Peptides:

| Peptide                                      | Uniq | -10lgP | Mass      | Length | ppm  | m/z       | z | RT    | Fraction | Scan     | Source File       | Area Roasted in gel | #Feature | #Feature Roasted in gel | Start | End | PTM                                 | AScore                                                                                       | Found By |
|----------------------------------------------|------|--------|-----------|--------|------|-----------|---|-------|----------|----------|-------------------|---------------------|----------|-------------------------|-------|-----|-------------------------------------|----------------------------------------------------------------------------------------------|----------|
| K.KNPQLQLDMLMTC(+57.02)VEIK.E                | N    | 136.41 | 2175.0737 | 18     | 1.4  | 1088.5457 | 2 | 35.26 | 43       | F43:1808 | OB5956 H1 Ro.raw  | 1.4906E7            | 6        | 6                       | 414   | 431 | Carbamidomethylation                | C14:Carb amidomet hylation:1 000.00                                                          | PEAKS DB |
| R.NTLEAFAFNAEFNEIR.R                         | N    | 130.93 | 1737.8322 | 15     | 1.8  | 869.9249  | 2 | 35.34 | 38       | F38:1714 | OB5951 H3A Ro.raw | 1.332E7             | 16       | 16                      | 313   | 327 |                                     |                                                                                              | PEAKS DB |
| K.GSEEEITNPINLRDGEPLSNFGR.L                  | N    | 129.76 | 2887.3220 | 26     | -0.7 | 963.4473  | 3 | 32.67 | 43       | F43:1660 | OB5956 H1 Ro.raw  | 1.2475E7            | 11       | 11                      | 380   | 405 |                                     |                                                                                              | PEAKS DB |
| K.NPQLQLDMLMTC(+57.02)VEIK.E                 | N    | 128.40 | 2046.9788 | 17     | 0.2  | 1024.4968 | 2 | 37.11 | 43       | F43:1936 | OB5956 H1 Ro.raw  | 3.4643E7            | 10       | 10                      | 415   | 431 | Carbamidomethylation                | C13:Carb amidomet hylation:1 000.00                                                          | PEAKS DB |
| K.NPQLQLDM(+15.99)MLTC(+57.02)VEIK.E         | N    | 128.16 | 2062.9736 | 17     | -4.2 | 1032.4897 | 2 | 36.93 | 43       | F43:1892 | OB5956 H1 Ro.raw  | 3.3834E6            | 3        | 3                       | 415   | 431 | Oxidation (M); Carbamidomethylation | M9:Oxidat ion (M):3 0.46;C13: Carbami domethylat ion:1000. 00                                | PEAKS DB |
| K.NPQLQLDMM(+15.99)LTC(+57.02)VEIK.E         | N    | 127.13 | 2062.9736 | 17     | 5.0  | 1032.4993 | 2 | 34.71 | 43       | F43:1780 | OB5956 H1 Ro.raw  | 1.0665E7            | 4        | 4                       | 415   | 431 | Oxidation (M); Carbamidomethylation | M10:Oxid ation (M): 30.46;C1 3:Carbami domethyla tion:1000. 00                               | PEAKS DB |
| K.ISM(+15.99)PVNTPGQFEDFFPASSR.D             | N    | 127.11 | 2242.0364 | 20     | 0.1  | 1122.0284 | 2 | 34.52 | 30       | F30:1521 | OB5926 H3B Ro.raw | 2.1708E7            | 14       | 13                      | 282   | 301 | Oxidation (M)                       | M3:Oxidat ion (M):1 000.00                                                                   | PEAKS DB |
| R.EQEWEEEEEEEEEGSNR.E                        | N    | 125.55 | 2280.8413 | 18     | 3.9  | 1141.4324 | 2 | 28.35 | 43       | F43:1396 | OB5956 H1 Ro.raw  | 4.3429E6            | 7        | 7                       | 473   | 490 |                                     |                                                                                              | PEAKS DB |
| K.ISMPVNTPGQFEDFFPASSR.D                     | N    | 125.26 | 2226.0415 | 20     | 0.7  | 1114.0288 | 2 | 35.83 | 43       | F43:1868 | OB5956 H1 Ro.raw  | 8.8227E7            | 23       | 23                      | 282   | 301 |                                     |                                                                                              | PEAKS DB |
| K.HADADNIIQQGQATVTVAN(+.98)GNNRK.S           | N    | 123.10 | 2747.3950 | 26     | 3.3  | 916.8087  | 3 | 29.62 | 43       | F43:1472 | OB5956 H1 Ro.raw  | 4.4266E6            | 11       | 11                      | 223   | 248 | Deamidation (NQ)                    | N21:Dea midation (NQ):31.9 1                                                                 | PEAKS DB |
| K.NPQLQLDM(+15.99)M(+15.99)LTC(+57.02)VEIK.E | N    | 121.59 | 2078.9688 | 17     | 6.6  | 1040.4985 | 2 | 33.82 | 43       | F43:1726 | OB5956 H1 Ro.raw  | 6.8984E4            | 2        | 2                       | 415   | 431 | Oxidation (M); Carbamidomethylation | M9:Oxidat ion (M):1 000.00;M 10:Oxidati on (M):10 00.00;C1 3:Carbami domethyla tion:1000. 00 | PEAKS DB |
| K.SFNLDEGHARIPSGFISYILNR.H                   | N    | 121.49 | 2618.3604 | 23     | 1.0  | 873.7949  | 3 | 37.51 | 41       | F41:1949 | OB5954 H1 Ro.raw  | 9.1637E7            | 28       | 28                      | 249   | 271 |                                     |                                                                                              | PEAKS DB |
| K.KNPQLQLDLM(+15.99)MLTC(+57.02)VEIK.E       | N    | 118.68 | 2191.0686 | 18     | 3.6  | 1096.5455 | 2 | 34.71 | 43       | F43:1781 | OB5956 H1 Ro.raw  | 1.3598E6            | 4        | 4                       | 414   | 431 | Oxidation (M); Carbamidomethylation | M10:Oxid ation (M): 27.96;C1 4:Carbami domethyla tion:1000. 00                               | PEAKS DB |
| K.AMVIVVVNKGTLNLELVAVR.K                     | N    | 114.87 | 2081.2031 | 20     | -1.0 | 1041.6078 | 2 | 34.35 | 43       | F43:1758 | OB5956 H1 Ro.raw  | 3.8361E7            | 13       | 13                      | 444   | 463 |                                     |                                                                                              | PEAKS DB |
| R.IFLAGDKDNVIDQIEK.Q                         | N    | 110.41 | 1816.9570 | 16     | -1.1 | 909.4848  | 2 | 32.67 | 43       | F43:1648 | OB5956 H1 Ro.raw  | 4.2419E8            | 56       | 55                      | 536   | 551 |                                     |                                                                                              | PEAKS DB |
| total 244 peptides                           |      |        |           |        |      |           |   |       |          |          |                   |                     |          |                         |       |     |                                     |                                                                                              |          |

| Peptide                                 | Uniq | -10lgP | Mass      | Length | ppm  | m/z       | z | RT    | Fraction | Scan     | Source File       | Area Roasted in gel | #Feature | #Feature Roasted in gel | Start | End | PTM                                   | AScore                                                   | Found By  |
|-----------------------------------------|------|--------|-----------|--------|------|-----------|---|-------|----------|----------|-------------------|---------------------|----------|-------------------------|-------|-----|---------------------------------------|----------------------------------------------------------|-----------|
| K.KNPQLQDLDMML(+15.99)LTC(+57.02)VEIK.E | N    | 110.35 | 2191.0686 | 18     | 3.5  | 1096.5454 | 2 | 32.98 | 42       | F42:1657 | OB5955 H1 Ro.raw  | 1.6495E6            | 4        | 4                       | 414   | 431 | Oxidation (M); Carbamidomethylation   | M11:Oxidation (M):23.10;C14:Carbamidomethylation:1000.00 | PEAKS DB  |
| K.KGSEEDITNPINLRDGEPLSNNFGR.L           | N    | 109.79 | 3015.4170 | 27     | 3.4  | 1006.1497 | 3 | 31.62 | 41       | F41:1565 | OB5954 H1 Ro.raw  | 1.1559E7            | 21       | 21                      | 379   | 405 |                                       |                                                          | PEAKS DB  |
| R.IPSGFSISYLNR.H                        | N    | 109.18 | 1378.7609 | 12     | 2.5  | 690.3894  | 2 | 36.50 | 38       | F38:1780 | OB5951 H3A Ro.raw | 4.4166E8            | 20       | 20                      | 260   | 271 |                                       |                                                          | PEAKS DB  |
| K.HADADNILVIQQGQATVTVANGNNRK.S          | N    | 108.34 | 2746.4111 | 26     | 1.9  | 916.4794  | 3 | 29.61 | 43       | F43:1451 | OB5956 H1 Ro.raw  | 3.8404E6            | 5        | 5                       | 223   | 248 |                                       |                                                          | PEAKS DB  |
| R.VLLEENAGGEQEER.G                      | N    | 108.33 | 1571.7427 | 14     | 2.4  | 786.8805  | 2 | 26.83 | 42       | F42:1293 | OB5955 H1 Ro.raw  | 2.9858E7            | 10       | 10                      | 329   | 342 |                                       |                                                          | PEAKS DB  |
| R.KSFNLDEGHALR.I                        | N    | 108.28 | 1385.7051 | 12     | 0.6  | 462.9092  | 3 | 26.14 | 43       | F43:1252 | OB5956 H1 Ro.raw  | 5.3666E6            | 6        | 6                       | 248   | 259 |                                       |                                                          | PEAKS DB  |
| K.AMVIVVVKGTGNLELVAVRK.E                | N    | 107.96 | 2209.2981 | 21     | 1.1  | 737.4408  | 3 | 33.05 | 43       | F43:1682 | OB5956 H1 Ro.raw  | 1.2362E8            | 20       | 20                      | 444   | 464 |                                       |                                                          | PEAKS DB  |
| R.I(+57.02)PSGFSISYLNR.H                | N    | 107.77 | 1435.7823 | 12     | -3.6 | 718.8959  | 2 | 36.92 | 43       | F43:1901 | OB5956 H1 Ro.raw  | 1.7559E7            | 7        | 7                       | 260   | 271 | Carbamidomethylation (DHKE, X@N-term) | I1:Carbamidomethylation (DHKE, X@N-term):1000.00         | PEAKS PTM |
| K.KGSEEDITNPINLR.D                      | N    | 107.76 | 1713.8533 | 15     | 2.8  | 857.9363  | 2 | 29.07 | 43       | F43:1439 | OB5956 H1 Ro.raw  | 8.6032E6            | 7        | 7                       | 379   | 393 |                                       |                                                          | PEAKS DB  |
| R.I(+57.02)FLAGDKDNVIDQIEK.Q            | N    | 105.70 | 1873.9785 | 16     | 1.7  | 937.9982  | 2 | 32.48 | 43       | F43:1653 | OB5956 H1 Ro.raw  | 1.1722E7            | 5        | 5                       | 536   | 551 | Carbamidomethylation (DHKE, X@N-term) | I1:Carbamidomethylation (DHKE, X@N-term):90.91           | PEAKS PTM |
| R.DQSSYLQGFNR.N                         | N    | 105.08 | 1286.5891 | 11     | 0.8  | 644.3024  | 2 | 30.81 | 40       | F40:1431 | OB5953 H3A Ro.raw | 9.5783E7            | 31       | 31                      | 302   | 312 |                                       |                                                          | PEAKS DB  |
| R.V(+57.02)LLEENAGGEQEER.G              | N    | 103.80 | 1628.7642 | 14     | 0.3  | 815.3896  | 2 | 27.08 | 43       | F43:1322 | OB5956 H1 Ro.raw  | 4.0193E5            | 3        | 3                       | 329   | 342 | Carbamidomethylation (DHKE, X@N-term) | V1:Carbamidomethylation (DHKE, X@N-term):49.37           | PEAKS PTM |
| K.NPQLQDLDMMLTCEIK(+14.02).E            | N    | 103.68 | 2003.9730 | 17     | -1.2 | 1002.9926 | 2 | 38.20 | 43       | F43:1989 | OB5956 H1 Ro.raw  | 5.9168E6            | 4        | 4                       | 415   | 431 | Methylation(KR)                       | K17:Methylation(KR):1000.00                              | PEAKS PTM |
| K.SFNLDEGHALR.I                         | N    | 103.18 | 1257.6101 | 11     | -1.7 | 629.8113  | 2 | 28.00 | 43       | F43:1362 | OB5956 H1 Ro.raw  | 1.1584E8            | 33       | 31                      | 249   | 259 |                                       |                                                          | PEAKS DB  |
| K.AM(+15.99)VIVVVKGTGNLELVAVR.K         | N    | 103.14 | 2097.1980 | 20     | 1.6  | 700.0744  | 3 | 33.04 | 43       | F43:1684 | OB5956 H1 Ro.raw  | 2.3148E7            | 9        | 9                       | 444   | 463 | Oxidation (M)                         | M2:Oxidation (M):1000.00                                 | PEAKS DB  |
| R.DGEPLSNNFGR.L                         | N    | 102.69 | 1319.5742 | 12     | 0.3  | 660.7946  | 2 | 29.24 | 43       | F43:1495 | OB5956 H1 Ro.raw  | 7.4875E6            | 3        | 3                       | 394   | 405 |                                       |                                                          | PEAKS DB  |
| K.DLAFFGSGEQVEK.L                       | N    | 100.93 | 1375.6619 | 13     | -1.9 | 688.8369  | 2 | 30.34 | 43       | F43:1508 | OB5956 H1 Ro.raw  | 9.196E7             | 8        | 8                       | 555   | 567 |                                       |                                                          | PEAKS DB  |
| total 244 peptides                      |      |        |           |        |      |           |   |       |          |          |                   |                     |          |                         |       |     |                                       |                                                          |           |



| Peptide                                           | Uniq | -10lgP | Mass      | Length | ppm  | m/z       | z | RT    | Fraction | Scan     | Source File      | Area Roasted in gel | #Feature | #Feature Roasted in gel | Start | End | PTM                                          | AScore                                                  | Found By  |
|---------------------------------------------------|------|--------|-----------|--------|------|-----------|---|-------|----------|----------|------------------|---------------------|----------|-------------------------|-------|-----|----------------------------------------------|---------------------------------------------------------|-----------|
| K.NPQLQLDLM(+15.99)MLTC(+57.02)VEIKEGALMLPHFNSK.A | N    | 100.40 | 3387.6335 | 29     | -0.6 | 1130.2178 | 3 | 37.70 | 41       | F41:1939 | OB5954 H1 Ro.raw | 8.7706E7            | 6        | 6                       | 415   | 443 | Oxidation (M); Carbamidomethylation          | M9:Oxidation (M):26.02;C13:Carbamidomethylation:1000.00 | PEAKS DB  |
| R.RVLLEENAGGEQEER.G                               | N    | 100.35 | 1727.8438 | 15     | 0.2  | 576.9553  | 3 | 25.30 | 42       | F42:1185 | OB5955 H1 Ro.raw | 8.2964E5            | 6        | 6                       | 328   | 342 |                                              |                                                         | PEAKS DB  |
| R.EGEQEWGTPGSEVR.E                                | Y    | 100.27 | 1559.6852 | 14     | 0.8  | 780.8505  | 2 | 27.93 | 42       | F42:1345 | OB5955 H1 Ro.raw | 3.381E6             | 3        | 3                       | 147   | 160 |                                              |                                                         | PEAKS DB  |
| K.NPQLQLDMLMLTC(+57.02)VEIKEGALMLPHFNSK.A         | N    | 98.85  | 3371.6387 | 29     | -2.7 | 843.9147  | 4 | 38.02 | 43       | F43:1969 | OB5956 H1 Ro.raw | 1.5351E8            | 12       | 12                      | 415   | 443 | Carbamidomethylation                         | C13:Carbamidomethylation:1000.00                        | PEAKS DB  |
| K.KNPQLQLDMLMLTC(+57.02)VEIKEGALMLPHFNSK.A        | N    | 97.96  | 3499.7336 | 30     | -3.9 | 875.9373  | 4 | 36.80 | 41       | F41:1884 | OB5954 H1 Ro.raw | 6.677E6             | 4        | 4                       | 414   | 443 | Carbamidomethylation                         | C14:Carbamidomethylation:1000.00                        | PEAKS DB  |
| R.VLLEEN(+.98)AGGEQEER.G                          | N    | 94.48  | 1572.7267 | 14     | 2.8  | 787.3728  | 2 | 27.46 | 43       | F43:1340 | OB5956 H1 Ro.raw | 6.2395E5            | 3        | 3                       | 329   | 342 | Deamidation (NQ)                             | N6:Deamidation (NQ):121.37                              | PEAKS DB  |
| R.IFLAGDKDNVIDQIEKQAK.D                           | N    | 94.35  | 2144.1477 | 19     | -2.1 | 715.7217  | 3 | 32.42 | 42       | F42:1625 | OB5955 H1 Ro.raw | 3.3984E6            | 9        | 9                       | 536   | 554 |                                              |                                                         | PEAKS DB  |
| R.KSFNLDEGHALRIPSGFISYILNR.H                      | N    | 93.78  | 2746.4553 | 24     | -0.7 | 687.6206  | 4 | 36.29 | 43       | F43:1876 | OB5956 H1 Ro.raw | 1.1783E6            | 4        | 4                       | 248   | 271 |                                              |                                                         | PEAKS DB  |
| R.REQEWEHEHEHEEGSNR.E                             | N    | 93.49  | 2436.9424 | 19     | 0.1  | 813.3215  | 3 | 26.72 | 43       | F43:1292 | OB5956 H1 Ro.raw | 8.6025E5            | 7        | 7                       | 472   | 490 |                                              |                                                         | PEAKS DB  |
| R.EGEQEWGTPGSEVRETSR.N                            | Y    | 93.19  | 2161.9512 | 19     | 3.0  | 1081.9861 | 2 | 27.83 | 43       | F43:1353 | OB5956 H1 Ro.raw | 3.9146E7            | 8        | 8                       | 147   | 165 |                                              |                                                         | PEAKS DB  |
| F.LAGDKDNVIDQIEK.Q                                | N    | 91.83  | 1556.8046 | 14     | -6.3 | 779.4047  | 2 | 32.21 | 43       | F43:1629 | OB5956 H1 Ro.raw | 5.4162E6            | 4        | 4                       | 538   | 551 |                                              |                                                         | PEAKS DB  |
| R.IPSGFISYILN(-17.03)R.H                          | N    | 91.80  | 1361.7343 | 12     | -4.9 | 681.8711  | 2 | 38.02 | 43       | F43:1980 | OB5956 H1 Ro.raw | 1.3387E6            | 3        | 3                       | 260   | 271 | Ammonia-loss (N)                             | N11:Ammonia-loss (N):1000.00                            | PEAKS PTM |
| K.AMVVVVNK.G                                      | N    | 91.04  | 971.5837  | 9      | -0.5 | 486.7989  | 2 | 30.16 | 43       | F43:1494 | OB5956 H1 Ro.raw | 7.1361E6            | 3        | 3                       | 444   | 452 |                                              |                                                         | PEAKS DB  |
| K.SFNLDEGH(+15.99)ALR.I                           | N    | 90.73  | 1273.6051 | 11     | 0.9  | 637.8104  | 2 | 30.16 | 43       | F43:1507 | OB5956 H1 Ro.raw | 8.7681E5            | 2        | 2                       | 249   | 259 | Oxidation (HW)                               | H8:Oxidation (HW):1000.00                               | PEAKS PTM |
| R.NNPFYFPSRR.F                                    | N    | 89.95  | 1296.6364 | 10     | -2.5 | 649.3239  | 2 | 28.89 | 43       | F43:1417 | OB5956 H1 Ro.raw | 1.3445E8            | 22       | 22                      | 166   | 175 |                                              |                                                         | PEAKS DB  |
| K.D(+57.02)LAFPGSGEQVEK.L                         | N    | 88.60  | 1432.6833 | 13     | -0.1 | 717.3489  | 2 | 31.08 | 41       | F41:1535 | OB5954 H1 Ro.raw | 9.7986E5            | 3        | 3                       | 555   | 567 | Carbamidomethylation (DHKE, X@N-term):131.10 | D1:Carbamidomethylation (DHKE, X@N-term):131.10         | PEAKS PTM |
| K.SFNLDEGH(+57.02)ALR.I                           | N    | 88.30  | 1314.6316 | 11     | -0.1 | 658.3230  | 2 | 28.22 | 41       | F41:1349 | OB5954 H1 Ro.raw | 2.9996E6            | 3        | 3                       | 249   | 259 | Carbamidomethylation (DHKE, X@N-term):30.36  | H8:Carbamidomethylation (DHKE, X@N-term):30.36          | PEAKS PTM |
| K.EGALMLPHFNSK.A                                  | N    | 88.21  | 1342.6703 | 12     | 2.5  | 672.3441  | 2 | 30.67 | 43       | F43:1529 | OB5956 H1 Ro.raw | 1.4087E7            | 5        | 5                       | 432   | 443 |                                              |                                                         | PEAKS DB  |
| K.NPQLQLDMM(-48.00)LTC(+57.02)VEIK.E              | N    | 88.05  | 1998.9755 | 17     | 1.9  | 1000.4969 | 2 | 32.85 | 43       | F43:1670 | OB5956 H1 Ro.raw | 5.9032E6            | 3        | 3                       | 415   | 431 | Carbamidomethylation                         | M10:Deamidomethyl:14.02;C13:Carbamid                    | PEAKS PTM |
| total 244 peptides                                |      |        |           |        |      |           |   |       |          |          |                  |                     |          |                         |       |     |                                              |                                                         |           |

| Peptide                                            | Uniq | -10lgP | Mass      | Length | ppm  | m/z       | z | RT    | Fraction | Scan     | Source File             | Area Roasted in gel | #Feature | #Feature Roasted in gel | Start | End | PTM                                                | AScore                                                                            | Found By     |
|----------------------------------------------------|------|--------|-----------|--------|------|-----------|---|-------|----------|----------|-------------------------|---------------------|----------|-------------------------|-------|-----|----------------------------------------------------|-----------------------------------------------------------------------------------|--------------|
|                                                    |      |        |           |        |      |           |   |       |          |          |                         |                     |          |                         |       |     |                                                    | omethylati<br>on:1000.0<br>0                                                      |              |
| K.GSEEDITNPINLR.D                                  | N    | 87.68  | 1585.7583 | 14     | 2.3  | 793.8882  | 2 | 31.16 | 42       | F42:1548 | OB5955<br>H1<br>Ro.raw  | 3.3709E6            | 3        | 3                       | 380   | 393 |                                                    |                                                                                   | PEAKS<br>DB  |
| R.GRREQEWEEEEEEEEGSNR.E                            | N    | 87.21  | 2650.0649 | 21     | 1.1  | 884.3632  | 3 | 26.73 | 41       | F41:1280 | OB5954<br>H1<br>Ro.raw  | 7.9956E5            | 6        | 6                       | 470   | 490 |                                                    |                                                                                   | PEAKS<br>DB  |
| R.NNPFYFPSR.R                                      | N    | 86.35  | 1140.5352 | 9      | -0.1 | 571.2748  | 2 | 31.76 | 43       | F43:1593 | OB5956<br>H1<br>Ro.raw  | 1.7218E7            | 11       | 11                      | 166   | 174 |                                                    |                                                                                   | PEAKS<br>DB  |
| K.S(+57.02)FNLDEGHALR.I                            | N    | 86.31  | 1314.6316 | 11     | -0.5 | 658.3228  | 2 | 28.11 | 42       | F42:1359 | OB5955<br>H1<br>Ro.raw  | 2.6997E6            | 4        | 4                       | 249   | 259 | Carbamidomethylation<br>(DHKE, X@N-term):9<br>1.04 | S1:Carb<br>amidometh<br>ylation (D<br>HKE, X@N<br>-term):9<br>1.04                | PEAKS<br>PTM |
| I.PSGFISYILNR.H                                    | N    | 85.97  | 1265.6768 | 11     | -4.6 | 633.8427  | 2 | 36.75 | 43       | F43:1894 | OB5956<br>H1<br>Ro.raw  | 3.5986E5            | 2        | 2                       | 261   | 271 |                                                    |                                                                                   | PEAKS<br>DB  |
| R.IPSGFISYILNRHDQNLR.V                             | N    | 84.75  | 2256.1763 | 19     | 6.5  | 753.0709  | 3 | 33.61 | 43       | F43:1714 | OB5956<br>H1<br>Ro.raw  | 6.1581E7            | 21       | 21                      | 260   | 278 |                                                    |                                                                                   | PEAKS<br>DB  |
| R.I(+27.99)FLAGDKDNVIDQIEK.Q                       | N    | 84.60  | 1844.9519 | 16     | -2.1 | 923.4813  | 2 | 36.23 | 41       | F41:1853 | OB5954<br>H1<br>Ro.raw  | 1.9485E6            | 3        | 3                       | 536   | 551 | Formylation                                        | I1:Formyl<br>ation:98.7<br>5                                                      | PEAKS<br>PTM |
| K.SFNLDEGH(+15.99)ALRIPSGFISYILNR.H                | N    | 83.49  | 2634.3555 | 23     | -4.0 | 879.1223  | 3 | 38.76 | 43       | F43:2023 | OB5956<br>H1<br>Ro.raw  | 8.8519E5            | 1        | 1                       | 249   | 271 | Oxidation (HW)                                     | H8:Oxidat<br>ion (HW):<br>1000.00                                                 | PEAKS<br>PTM |
| K.KNPQLQDLDMMLTC(+57.02)VEIKEGALM(+15.99)LPHFNSK.A | N    | 83.11  | 3515.7285 | 30     | -1.9 | 879.9377  | 4 | 36.03 | 43       | F43:1857 | OB5956<br>H1<br>Ro.raw  | 6.6263E6            | 3        | 3                       | 414   | 443 | Carbamidomethylation;<br>Oxidation (M)             | C14:Carb<br>amidomet<br>hylation:1<br>000.00;M<br>23:Oxidati<br>on (M):11<br>4.34 | PEAKS<br>DB  |
| R.NTLEAAFAEFNEIRR.V                                | N    | 82.99  | 1893.9332 | 16     | -2.6 | 947.9714  | 2 | 34.11 | 42       | F42:1711 | OB5955<br>H1<br>Ro.raw  | 3.0959E8            | 36       | 35                      | 313   | 328 |                                                    |                                                                                   | PEAKS<br>DB  |
| K.A(+57.02)MVIVVVNKG TGNLELVAVR.K                  | N    | 82.14  | 2138.2246 | 20     | -5.4 | 1070.1138 | 2 | 34.47 | 42       | F42:1739 | OB5955<br>H1<br>Ro.raw  | 4.4412E6            | 3        | 3                       | 444   | 463 | Carbamidomethylation<br>(DHKE, X@N-term)           | A1:Carba<br>midometh<br>ylation (D<br>HKE, X@N<br>-term):20<br>7.56               | PEAKS<br>PTM |
| K.DLAFPGSGEQVEKLIK.N                               | N    | 80.89  | 1729.9249 | 16     | -1.6 | 865.9706  | 2 | 33.95 | 30       | F30:1478 | OB5926<br>H3B<br>Ro.raw | 3.9305E5            | 5        | 4                       | 555   | 570 |                                                    |                                                                                   | PEAKS<br>DB  |
| I.FLAGDKDNVIDQIEK.Q                                | N    | 80.64  | 1703.8729 | 15     | -5.7 | 852.9388  | 2 | 32.22 | 43       | F43:1635 | OB5956<br>H1<br>Ro.raw  | 3.1343E5            | 3        | 3                       | 537   | 551 |                                                    |                                                                                   | PEAKS<br>DB  |
| K.EGALM(+15.99)LPHFNSK.A                           | N    | 80.48  | 1358.6653 | 12     | 1.1  | 680.3406  | 2 | 29.85 | 43       | F43:1485 | OB5956<br>H1<br>Ro.raw  | 3.0314E6            | 5        | 5                       | 432   | 443 | Oxidation (M)                                      | M5:Oxidat<br>ion (M):1<br>000.00                                                  | PEAKS<br>DB  |
| K.GTGNLELVAVR.K                                    | N    | 80.39  | 1127.6299 | 11     | -1.3 | 564.8215  | 2 | 30.21 | 41       | F41:1476 | OB5954<br>H1<br>Ro.raw  | 2.4706E7            | 5        | 5                       | 453   | 463 |                                                    |                                                                                   | PEAKS<br>DB  |
| R.NTLEAAFN(+.98)AEFNEIRR.V                         | N    | 79.02  | 1894.9172 | 16     | -2.2 | 948.4638  | 2 | 32.35 | 41       | F41:1616 | OB5954<br>H1<br>Ro.raw  | 1.3357E6            | 5        | 5                       | 313   | 328 | Deamidation (NQ)                                   | N8:Deami<br>dation (N<br>Q):48.12                                                 | PEAKS<br>DB  |
| R.VLLEENAGGEQEER(+14.02).G                         | N    | 78.92  | 1585.7583 | 14     | 0.7  | 793.8870  | 2 | 27.86 | 41       | F41:1339 | OB5954<br>H1<br>Ro.raw  | 1.6341E5            | 3        | 3                       | 329   | 342 | Methylation(KR)                                    | R14:Meth<br>ylation(K<br>R):1000.0<br>0                                           | PEAKS<br>PTM |
| K.GTGNLELVAVRK.E                                   | N    | 78.87  | 1255.7249 | 12     | 0.7  | 628.8701  | 2 | 27.30 | 41       | F41:1322 | OB5954<br>H1<br>Ro.raw  | 2.29E7              | 10       | 10                      | 453   | 464 |                                                    |                                                                                   | PEAKS<br>DB  |
| K.QFQNLQNHR.I                                      | N    | 78.35  | 1183.5846 | 9      | 0.0  | 592.7996  | 2 | 23.81 | 42       | F42:1102 | OB5955<br>H1<br>Ro.raw  | 1.5125E5            | 6        | 6                       | 199   | 207 |                                                    |                                                                                   | PEAKS<br>DB  |
| total 244 peptides                                 |      |        |           |        |      |           |   |       |          |          |                         |                     |          |                         |       |     |                                                    |                                                                                   |              |

| Peptide                                                    | Uniq | -10lgP | Mass      | Length | ppm  | m/z       | z | RT    | Fraction | Scan     | Source File      | Area Roasted in gel | #Feature | #Feature Roasted in gel | Start | End | PTM                                 | AScore                                                                           | Found By  |
|------------------------------------------------------------|------|--------|-----------|--------|------|-----------|---|-------|----------|----------|------------------|---------------------|----------|-------------------------|-------|-----|-------------------------------------|----------------------------------------------------------------------------------|-----------|
| K.NPQLQDLDMM(+15.99)LTC(+57.02)VEIKEGALMLPHFNSK.A          | N    | 78.01  | 3387.6335 | 29     | -0.8 | 1130.2175 | 3 | 36.42 | 41       | F41:1862 | OB5954 H1 Ro.raw | 6.8935E7            | 6        | 6                       | 415   | 443 | Oxidation (M); Carbamidomethylation | M10:Oxidation (M):24.44;C13:Carbamidomethylation:1000.00                         | PEAKS DB  |
| R.LFEVKPKDKNPQLQDLDMMLTC(+57.02)VEIK.E                     | N    | 77.87  | 3131.6069 | 26     | -4.0 | 1044.8721 | 3 | 34.65 | 42       | F42:1756 | OB5955 H1 Ro.raw | 5.0788E6            | 4        | 4                       | 406   | 431 | Carbamidomethylation                | C22:Carbamidomethylation:1000.00                                                 | PEAKS DB  |
| K.NPQLQDLDM(+15.99)MLTC(+57.02)VEIKEGALM(+15.99)LPHFNSK.A  | N    | 77.10  | 3403.6284 | 29     | 1.1  | 851.9153  | 4 | 37.51 | 41       | F41:1883 | OB5954 H1 Ro.raw | 7.3887E6            | 7        | 7                       | 415   | 443 | Oxidation (M); Carbamidomethylation | M9:Oxidation (M):27.96;C13:Carbamidomethylation:1000.00;M22:Oxidation (M):71.31  | PEAKS DB  |
| R.IFLAGDKDNVIDQIEKQ(+.98)AK.D                              | N    | 76.22  | 2145.1316 | 19     | 1.5  | 716.0522  | 3 | 33.08 | 42       | F42:1661 | OB5955 H1 Ro.raw | 0                   | 0        | 0                       | 536   | 554 | Deamidation (NQ)                    | Q17:Deamidation (NQ):48.83                                                       | PEAKS DB  |
| R.EETSRN(+.98)NPYFPSRR.F                                   | N    | 75.62  | 1899.8864 | 15     | -0.2 | 634.3026  | 3 | 28.39 | 41       | F41:1381 | OB5954 H1 Ro.raw | 3.2976E5            | 2        | 2                       | 161   | 175 | Deamidation (NQ)                    | N6:Deamidation (NQ):33.98                                                        | PEAKS DB  |
| L.AGDKDNVIDQIEK.Q                                          | N    | 75.39  | 1443.7205 | 13     | -3.7 | 722.8649  | 2 | 32.08 | 42       | F42:1607 | OB5955 H1 Ro.raw | 3.3426E5            | 1        | 1                       | 539   | 551 |                                     |                                                                                  | PEAKS DB  |
| K.Q(-17.03)FQNLQNHR.I                                      | N    | 75.35  | 1166.5581 | 9      | -1.2 | 584.2856  | 2 | 28.00 | 43       | F43:1365 | OB5956 H1 Ro.raw | 4.927E6             | 4        | 4                       | 199   | 207 | Pyro-glu from Q                     | Q1:Pyro-glu from Q:1000.00                                                       | PEAKS PTM |
| R.SSDNEGVIVK.V                                             | N    | 75.32  | 1046.5244 | 10     | -1.0 | 524.2690  | 2 | 23.58 | 41       | F41:1103 | OB5954 H1 Ro.raw | 3.7568E5            | 3        | 3                       | 351   | 360 |                                     |                                                                                  | PEAKS DB  |
| R.VAKISMPVNTPGQFEDFFPASSR.D                                | N    | 74.27  | 2524.2419 | 23     | -2.9 | 842.4188  | 3 | 34.29 | 42       | F42:1735 | OB5955 H1 Ro.raw | 1.4483E6            | 3        | 3                       | 279   | 301 |                                     |                                                                                  | PEAKS DB  |
| K.NPQLQDLDM(+15.99)M(+15.99)LTC(+57.02)VEIKEGALMLPHFNSK.A  | N    | 73.00  | 3403.6284 | 29     | -3.9 | 1135.5457 | 3 | 35.83 | 43       | F43:1849 | OB5956 H1 Ro.raw | 7.8068E6            | 5        | 5                       | 415   | 443 | Oxidation (M); Carbamidomethylation | M9:Oxidation (M):54.18;M10:Oxidation (M):63.99;C13:Carbamidomethylation:1000.00  | PEAKS DB  |
| K.KNPQLQDLDM(+15.99)MLTC(+57.02)VEIKEGALM(+15.99)LPHFNSK.A | N    | 72.71  | 3531.7234 | 30     | -1.9 | 883.9364  | 4 | 35.86 | 41       | F41:1821 | OB5954 H1 Ro.raw | 7.53E5              | 1        | 1                       | 414   | 443 | Carbamidomethylation; Oxidation (M) | M10:Oxidation (M):17.01;C14:Carbamidomethylation:1000.00;M23:Oxidation (M):85.25 | PEAKS DB  |
| R.VLLEENAGGEQEERQGR.R                                      | N    | 72.44  | 1912.9238 | 17     | 0.6  | 957.4698  | 2 | 25.30 | 42       | F42:1191 | OB5955 H1 Ro.raw | 3.1353E6            | 8        | 8                       | 329   | 345 |                                     |                                                                                  | PEAKS DB  |
| K.QAKDLAFPGSGEQVEK.L                                       | N    | 72.39  | 1702.8525 | 16     | 1.2  | 568.6255  | 3 | 27.08 | 43       | F43:1321 | OB5956 H1 Ro.raw | 2.8232E5            | 6        | 6                       | 552   | 567 |                                     |                                                                                  | PEAKS DB  |
| K.EGALMLPHFN(+.98)SK.A                                     | N    | 71.37  | 1343.6543 | 12     | 2.6  | 672.8362  | 2 | 31.66 | 43       | F43:1595 | OB5956 H1 Ro.raw | 1.0101E5            | 2        | 2                       | 432   | 443 | Deamidation (NQ)                    | N10:Deamidation (NQ):1000.00                                                     | PEAKS DB  |
| R.EQEW(+15.99)EEEEEEEEEGSNR.E                              | N    | 70.36  | 2296.8362 | 18     | 3.2  | 1149.4291 | 2 | 27.67 | 41       | F41:1333 | OB5954 H1 Ro.raw | 1.024E6             | 3        | 3                       | 473   | 490 | Oxidation (HW)                      | W4:Oxidation (HW):1000.00                                                        | PEAKS PTM |
| total 244 peptides                                         |      |        |           |        |      |           |   |       |          |          |                  |                     |          |                         |       |     |                                     |                                                                                  |           |

| Peptide                                        | Uniq | -10lgP | Mass      | Length | ppm  | m/z       | z | RT    | Fraction | Scan     | Source File       | Area Roasted in gel | #Feature | #Feature Roasted in gel | Start | End | PTM                                         | AScore                                                     | Found By  |
|------------------------------------------------|------|--------|-----------|--------|------|-----------|---|-------|----------|----------|-------------------|---------------------|----------|-------------------------|-------|-----|---------------------------------------------|------------------------------------------------------------|-----------|
| F.NLDEGHALR.I                                  | N    | 70.14  | 1023.5097 | 9      | -2.5 | 512.7609  | 2 | 28.00 | 43       | F43:1370 | OB5956 H1 Ro.raw  | 2.6181E6            | 3        | 3                       | 251   | 259 |                                             |                                                            | PEAKS DB  |
| R.N(+.98)TLEAAFNAEFNEIRR.V                     | N    | 69.73  | 1894.9172 | 16     | 0.4  | 948.4662  | 2 | 32.39 | 42       | F42:1620 | OB5955 H1 Ro.raw  | 2.6319E6            | 3        | 3                       | 313   | 328 | Deamidation (NQ)                            | N1:Deamidation (NQ):41.52                                  | PEAKS DB  |
| E.PDLSNNFGR.L                                  | N    | 69.35  | 1018.4832 | 9      | 0.9  | 510.2493  | 2 | 31.57 | 43       | F43:1584 | OB5956 H1 Ro.raw  | 1.3026E6            | 4        | 4                       | 397   | 405 |                                             |                                                            | PEAKS DB  |
| R.K(+57.02)SFNLDEGHALR.I                       | N    | 69.20  | 1442.7266 | 12     | -0.1 | 722.3705  | 2 | 26.25 | 42       | F42:1250 | OB5955 H1 Ro.raw  | 4.0798E5            | 6        | 6                       | 248   | 259 | Carbamidomethylation (DHKE, X@N-term):76.17 | K1:Carbamidomethylation (DHKE, X@N-term):76.17             | PEAKS PTM |
| R.LFEVKPKKPNQLQDLDDMM(+15.99)LTC(+57.02)VEIK.E | N    | 69.17  | 3147.6018 | 26     | 2.2  | 787.9095  | 4 | 33.24 | 42       | F42:1670 | OB5955 H1 Ro.raw  | 2.0797E6            | 2        | 2                       | 406   | 431 | Oxidation (M); Carbamidomethylation         | M19:Oxidation (M):40.00;C22:Carbamidomethylation:1000.00   | PEAKS DB  |
| K.SFNLDE(+57.02)GHALRIPSGFISYILNR.H            | N    | 69.07  | 2675.3818 | 23     | -1.9 | 892.7996  | 3 | 37.80 | 43       | F43:1964 | OB5956 H1 Ro.raw  | 0                   | 0        | 0                       | 249   | 271 |                                             | E6:Carbamidomethylation (DHKE, X@N-term):0.00              | PEAKS PTM |
| R.IFLAGDKDNVID(+57.02)QIEK.Q                   | N    | 69.05  | 1873.9785 | 16     | -1.3 | 937.9953  | 2 | 32.42 | 42       | F42:1608 | OB5955 H1 Ro.raw  | 8.0339E6            | 1        | 1                       | 536   | 551 |                                             | D12:Carbamidomethylation (DHKE, X@N-term):15.85            | PEAKS PTM |
| R.IVQIEARPNTLVLPK.H                            | Y    | 68.17  | 1690.0140 | 15     | -1.0 | 846.0134  | 2 | 30.56 | 41       | F41:1509 | OB5954 H1 Ro.raw  | 4.6727E7            | 21       | 21                      | 208   | 222 |                                             |                                                            | PEAKS DB  |
| A.GDKDNVIDQIEK.Q                               | N    | 68.14  | 1372.6833 | 12     | -7.0 | 687.3441  | 2 | 32.22 | 43       | F43:1632 | OB5956 H1 Ro.raw  | 1.1241E6            | 3        | 3                       | 540   | 551 |                                             |                                                            | PEAKS DB  |
| G.SEEEDITNPINLRDGEPLDLSNNFGR.L                 | N    | 68.10  | 2830.3005 | 25     | -1.6 | 944.4417  | 3 | 33.02 | 30       | F30:1421 | OB5926 H3B Ro.raw | 1.3758E5            | 3        | 3                       | 381   | 405 |                                             |                                                            | PEAKS DB  |
| R.RVLLEEN(+.98)AGGEQEER.G                      | N    | 67.83  | 1728.8278 | 15     | -0.8 | 577.2827  | 3 | 25.96 | 42       | F42:1233 | OB5955 H1 Ro.raw  | 1.359E4             | 2        | 2                       | 328   | 342 | Deamidation (NQ)                            | N7:Deamidation (NQ):77.53                                  | PEAKS DB  |
| R.DQS(-18.01)SYLQGFSR.N                        | N    | 67.70  | 1268.5785 | 11     | 0.2  | 635.2966  | 2 | 30.91 | 41       | F41:1537 | OB5954 H1 Ro.raw  | 6.4401E5            | 3        | 3                       | 302   | 312 | Dehydration                                 | S3:Dehydration:40.00                                       | PEAKS PTM |
| R.RVLLEENAGGEQEERGQR.R                         | N    | 67.67  | 2069.0249 | 18     | 1.9  | 690.6835  | 3 | 25.60 | 41       | F41:1205 | OB5954 H1 Ro.raw  | 1.8247E6            | 3        | 3                       | 328   | 345 |                                             |                                                            | PEAKS DB  |
| K.Q(-17.03)AKDLAFPGSGEQVEK.L                   | N    | 67.52  | 1685.8260 | 16     | 0.1  | 843.9204  | 2 | 29.98 | 43       | F43:1503 | OB5956 H1 Ro.raw  | 9.9003E4            | 3        | 3                       | 552   | 567 | Pyro-glu from Q                             | Q1:Pyro-glu from Q:1000.00                                 | PEAKS PTM |
| K.NPQLQ(+.98)DLDMMLTLC(+57.02)VEIK.E           | N    | 67.25  | 2047.9629 | 17     | 1.5  | 1024.9902 | 2 | 44.46 | 43       | F43:2348 | OB5956 H1 Ro.raw  | 0                   | 0        | 0                       | 415   | 431 | Carbamidomethylation                        | Q5:Deamidation (NQ):19.68;C13:Carbamidomethylation:1000.00 | PEAKS DB  |
| K.SFNLDE(-18.01)EGHALR.I                       | N    | 66.88  | 1239.5996 | 11     | 2.9  | 620.8089  | 2 | 28.79 | 41       | F41:1400 | OB5954 H1 Ro.raw  | 0                   | 0        | 0                       | 249   | 259 | Dehydration                                 | D5:Dehydration:49.79                                       | PEAKS PTM |
| K.AM(+15.99)VIVVVNK.G                          | N    | 66.42  | 987.5787  | 9      | 1.1  | 494.7972  | 2 | 27.11 | 41       | F41:1283 | OB5954 H1 Ro.raw  | 1.8879E6            | 3        | 3                       | 444   | 452 | Oxidation (M)                               | M2:Oxidation (M):1000.00                                   | PEAKS DB  |
| K.KNPQLQDLDMMLTCVEIK(+14.02).E                 | N    | 66.06  | 2132.0679 | 18     | -0.6 | 1067.0405 | 2 | 36.31 | 41       | F41:1858 | OB5954 H1 Ro.raw  | 5.2356E5            | 2        | 2                       | 414   | 431 | Methylation(KR)                             | K18:Methylation(KR):130.57                                 | PEAKS PTM |
| total 244 peptides                             |      |        |           |        |      |           |   |       |          |          |                   |                     |          |                         |       |     |                                             |                                                            |           |

| Peptide                                                  | Uniq | -10lgP | Mass      | Length | ppm  | m/z       | z | RT    | Fraction | Scan     | Source File      | Area Roasted in gel | #Feature | #Feature Roasted in gel | Start | End | PTM                                   | AScore                                                               | Found By  |
|----------------------------------------------------------|------|--------|-----------|--------|------|-----------|---|-------|----------|----------|------------------|---------------------|----------|-------------------------|-------|-----|---------------------------------------|----------------------------------------------------------------------|-----------|
| R.EETSRNNPFYFPSRR.F                                      | N    | 65.61  | 1898.9023 | 15     | 1.8  | 633.9759  | 3 | 27.75 | 42       | F42:1339 | OB5955 H1 Ro.raw | 8.693E5             | 4        | 4                       | 161   | 175 |                                       |                                                                      | PEAKS DB  |
| K.NPQLQDLDMMLTC(+57.02)VEIKEGALM(+15.99)LPHFNSK.A        | N    | 64.76  | 3387.6335 | 29     | -0.6 | 847.9152  | 4 | 37.63 | 43       | F43:1915 | OB5956 H1 Ro.raw | 8.7706E7            | 6        | 6                       | 415   | 443 | Carbamidomethylation; Oxidation (M)   | C13:Carb amidomet hylation:1 000.00;M 22:Oxidati on (M):8 2.05       | PEAKS DB  |
| R.IPSGFISY(+125.90)ILNR.H                                | N    | 64.64  | 1504.6575 | 12     | -1.9 | 753.3346  | 2 | 38.39 | 43       | F43:2001 | OB5956 H1 Ro.raw | 2.0334E5            | 2        | 2                       | 260   | 271 | Iodination                            | Y8:Iodinat ion:1000. 00                                              | PEAKS PTM |
| R.IPSGFISYILN(+.98)RHDNQNL.R.V                           | N    | 64.64  | 2257.1604 | 19     | 4.7  | 753.3976  | 3 | 34.29 | 42       | F42:1740 | OB5955 H1 Ro.raw | 6.9901E5            | 2        | 2                       | 260   | 278 | Deamidation (NQ)                      | N11:Dea midation (NQ):36.2 4                                         | PEAKS DB  |
| R.WGPAEPR.E                                              | Y    | 64.52  | 811.3976  | 7      | 1.8  | 406.7068  | 2 | 25.60 | 41       | F41:1224 | OB5954 H1 Ro.raw | 1.6282E6            | 3        | 3                       | 109   | 115 |                                       |                                                                      | PEAKS DB  |
| R.IVQIEARPN.T                                            | Y    | 64.48  | 1038.5822 | 9      | -0.5 | 520.2981  | 2 | 25.87 | 42       | F42:1229 | OB5955 H1 Ro.raw | 4.4669E4            | 3        | 3                       | 208   | 216 |                                       |                                                                      | PEAKS DB  |
| A.FPGSGEQVEK.L                                           | N    | 64.10  | 1076.5138 | 10     | -3.4 | 539.2623  | 2 | 30.29 | 42       | F42:1495 | OB5955 H1 Ro.raw | 4.0412E5            | 3        | 3                       | 558   | 567 |                                       |                                                                      | PEAKS DB  |
| K.ISMPVNTPGQFEDFFPASSRDQSSYLQGFSR.N                      | N    | 63.85  | 3494.6201 | 31     | -0.9 | 1165.8796 | 3 | 36.01 | 43       | F43:1851 | OB5956 H1 Ro.raw | 5.8723E6            | 6        | 6                       | 282   | 312 |                                       |                                                                      | PEAKS DB  |
| R.LFEVKPDKK.N                                            | N    | 63.79  | 1102.6385 | 9      | 0.6  | 552.3269  | 2 | 24.50 | 43       | F43:1159 | OB5956 H1 Ro.raw | 1.1348E6            | 6        | 6                       | 406   | 414 |                                       |                                                                      | PEAKS DB  |
| Q.SSYLQGFSR.N                                            | N    | 63.16  | 1043.5035 | 9      | 1.4  | 522.7598  | 2 | 29.29 | 41       | F41:1438 | OB5954 H1 Ro.raw | 6.2708E4            | 3        | 3                       | 304   | 312 |                                       |                                                                      | PEAKS DB  |
| K.QFQNLQN(+.98)HR.I                                      | N    | 63.09  | 1184.5686 | 9      | 5.4  | 593.2948  | 2 | 23.60 | 43       | F43:1114 | OB5956 H1 Ro.raw | 8.0412E2            | 1        | 1                       | 199   | 207 |                                       | N7:Deami dation (N Q):0.00                                           | PEAKS DB  |
| K.EGALMLPH(+14.02)FNSK.A                                 | N    | 63.06  | 1356.6860 | 12     | -4.2 | 679.3475  | 2 | 30.85 | 43       | F43:1554 | OB5956 H1 Ro.raw | 2.9707E5            | 3        | 3                       | 432   | 443 | Methylation(others)                   | H8:Methyl ation(oth ers):65.81                                       | PEAKS PTM |
| P.SGFISYILNR.H                                           | N    | 63.04  | 1168.6240 | 10     | 1.5  | 585.3202  | 2 | 35.08 | 43       | F43:1803 | OB5956 H1 Ro.raw | 2.9962E5            | 1        | 1                       | 262   | 271 |                                       |                                                                      | PEAKS DB  |
| N.LDEGHALR.I                                             | N    | 62.84  | 909.4668  | 8      | 0.0  | 455.7407  | 2 | 27.93 | 42       | F42:1350 | OB5955 H1 Ro.raw | 1.8672E5            | 3        | 3                       | 252   | 259 |                                       |                                                                      | PEAKS DB  |
| K.A(+57.02)MVIVVVNKG TGNLELVA VRK.E                      | N    | 62.52  | 2266.3196 | 21     | 0.7  | 1134.1678 | 2 | 32.98 | 42       | F42:1660 | OB5955 H1 Ro.raw | 1.5099E7            | 6        | 6                       | 444   | 464 | Carbamidomethylation (DHKE, X@N-term) | A1:Carba midometh ylation (D HKE, X@N -term):13 9.69                 | PEAKS PTM |
| K.HADADN ILVIQQGQATVTVANGN(+.98)NRK.S                    | N    | 62.31  | 2747.3950 | 26     | -0.1 | 916.8055  | 3 | 30.70 | 41       | F41:1517 | OB5954 H1 Ro.raw | 8.5956E3            | 1        | 1                       | 223   | 248 |                                       | N23:Dea midation (NQ):9.40                                           | PEAKS DB  |
| K.SFN(+15.99)LDEGHALR.I                                  | N    | 62.00  | 1273.6051 | 11     | 0.0  | 637.8098  | 2 | 27.46 | 43       | F43:1330 | OB5956 H1 Ro.raw | 9.622E5             | 3        | 3                       | 249   | 259 | Oxidation or Hydroxylation            | N3:Oxidat ion or Hyd roxylatio n:55.92                               | PEAKS PTM |
| R.IP(+15.99)SGFISYILNR.H                                 | N    | 61.98  | 1394.7557 | 12     | -0.8 | 698.3846  | 2 | 37.47 | 43       | F43:1932 | OB5956 H1 Ro.raw | 3.2208E6            | 4        | 4                       | 260   | 271 | Oxidation or Hydroxylation            | P2:Oxidati on or Hyd roxylatio n:39.25                               | PEAKS PTM |
| K.NPQLQDLDM(+15.99)LTC(+57.02)VEIKEGALM(+15.99)LPHFNSK.A | N    | 61.19  | 3403.6284 | 29     | 0.3  | 851.9147  | 4 | 35.86 | 41       | F41:1801 | OB5954 H1 Ro.raw | 3.4294E6            | 4        | 4                       | 415   | 443 | Oxidation (M); Carbamidomethylation   | M10:Oxid ation (M): 21.94;C1 3:Carbami domethyla tion:1000. 00;M22:O | PEAKS DB  |
| total 244 peptides                                       |      |        |           |        |      |           |   |       |          |          |                  |                     |          |                         |       |     |                                       |                                                                      |           |

| Peptide                                                           | Uniq | -10lgP | Mass      | Length | ppm  | m/z       | z | RT    | Fraction | Scan     | Source File       | Area Roasted in gel | #Feature | #Feature Roasted in gel | Start | End | PTM                                   | AScore                                                                                                        | Found By  |
|-------------------------------------------------------------------|------|--------|-----------|--------|------|-----------|---|-------|----------|----------|-------------------|---------------------|----------|-------------------------|-------|-----|---------------------------------------|---------------------------------------------------------------------------------------------------------------|-----------|
|                                                                   |      |        |           |        |      |           |   |       |          |          |                   |                     |          |                         |       |     |                                       | xidation (M):61.50                                                                                            |           |
| K.G(+57.02)TGNLELVAVRK.E                                          | N    | 60.73  | 1312.7462 | 12     | -0.4 | 657.3801  | 2 | 27.30 | 41       | F41:1303 | OB5954 H1 Ro.raw  | 3.6978E5            | 2        | 2                       | 453   | 464 | Carbamidomethylation (DHKE, X@N-term) | G1:Carbamidomethylation (DHKE, X@N-term):55.46                                                                | PEAKS PTM |
| R.EQEWEEEEEEEEGSNREVRR.Y                                          | N    | 60.58  | 2821.1545 | 22     | 1.9  | 941.3939  | 3 | 26.71 | 43       | F43:1297 | OB5956 H1 Ro.raw  | 1.0274E6            | 4        | 4                       | 473   | 494 |                                       |                                                                                                               | PEAKS DB  |
| K.NPQLQLDLM(+15.99)M(+15.99)LTC(+57.02)VEIKEGALM(+15.99)LPHFNSK.A | N    | 60.17  | 3419.6233 | 29     | -0.9 | 855.9124  | 4 | 34.83 | 42       | F42:1766 | OB5955 H1 Ro.raw  | 1.2322E6            | 3        | 3                       | 415   | 443 | Oxidation (M); Carbamidomethylation   | M9:Oxidation (M):1000.00;M10:Oxidation (M):1000.00;C13:Carbamidomethylation:1000.00;M22:Oxidation (M):1000.00 | PEAKS DB  |
| R.IPSGFISY(+15.99)ILNR.H                                          | N    | 60.13  | 1394.7557 | 12     | -0.7 | 698.3846  | 2 | 35.11 | 41       | F41:1859 | OB5954 H1 Ro.raw  | 3.4529E6            | 5        | 5                       | 260   | 271 | Oxidation or Hydroxylation            | Y8:Oxidation or Hydroxylation:67.76                                                                           | PEAKS PTM |
| L.DEGHALR.I                                                       | N    | 59.61  | 796.3828  | 7      | 2.5  | 399.1996  | 2 | 27.93 | 42       | F42:1351 | OB5955 H1 Ro.raw  | 9.3538E4            | 3        | 3                       | 253   | 259 |                                       |                                                                                                               | PEAKS DB  |
| R.LFEVKPKKPNPQLQ(+.98)DLDM(+15.99)LTC(+57.02)VEIK.E               | N    | 59.38  | 3148.5857 | 26     | 7.4  | 788.1595  | 4 | 33.17 | 42       | F42:1670 | OB5955 H1 Ro.raw  | 3.9804E5            | 1        | 1                       | 406   | 431 | Oxidation (M); Carbamidomethylation   | Q14:Deamidation (NQ):0.00;M19:Oxidation (M):23.10;C22:Carbamidomethylation:1000.00                            | PEAKS DB  |
| R.VLLEEN(-17.03)AGGEQEER.G                                        | N    | 59.22  | 1554.7162 | 14     | 1.2  | 778.3663  | 2 | 27.73 | 42       | F42:1335 | OB5955 H1 Ro.raw  | 0                   | 0        | 0                       | 329   | 342 | Ammonia-loss (N)                      | N6:Ammonia-loss (N):1000.00                                                                                   | PEAKS PTM |
| K.SFNLDEGHALRIPSGFISYILNRHDNQNL.R.V                               | N    | 59.07  | 3495.7759 | 30     | 1.5  | 700.1635  | 5 | 39.97 | 40       | F40:1987 | OB5953 H3A Ro.raw | 2.0405E7            | 15       | 15                      | 249   | 278 |                                       |                                                                                                               | PEAKS DB  |
| K.SFNLDEGHALR(+31.99)IPSGFISYILNR.H                               | N    | 58.88  | 2650.3503 | 23     | 0.1  | 884.4575  | 3 | 39.14 | 42       | F42:2021 | OB5955 H1 Ro.raw  | 5.6519E5            | 1        | 1                       | 249   | 271 | Dihydroxy                             | R11:Dihydroxy:46.57                                                                                           | PEAKS PTM |
| R.LFEVKPKD.K                                                      | N    | 58.71  | 974.5436  | 8      | 1.7  | 488.2799  | 2 | 25.30 | 42       | F42:1183 | OB5955 H1 Ro.raw  | 1.7315E6            | 6        | 6                       | 406   | 413 |                                       |                                                                                                               | PEAKS DB  |
| K.GSEEDITNPIN(+.98)LRDGEPLSNNGFR.L                                | N    | 58.69  | 2888.3059 | 26     | 6.7  | 1445.1699 | 2 | 32.90 | 41       | F41:1642 | OB5954 H1 Ro.raw  | 1.7853E5            | 1        | 1                       | 380   | 405 |                                       | N12:Deamidation (NQ):12.33                                                                                    | PEAKS DB  |
| K.SFNLDE(+57.02)GHALR.I                                           | N    | 58.62  | 1314.6316 | 11     | 0.3  | 658.3232  | 2 | 27.83 | 43       | F43:1458 | OB5956 H1 Ro.raw  | 2.3371E6            | 2        | 2                       | 249   | 259 | Carbamidomethylation (DHKE, X@N-term) | E6:Carbamidomethylation (DHKE, X@N-term):27.25                                                                | PEAKS PTM |
| R.N(+57.02)NPFFPSRR.F                                             | N    | 58.56  | 1353.6577 | 10     | 1.1  | 677.8369  | 2 | 29.74 | 42       | F42:1453 | OB5955 H1 Ro.raw  | 9.24E5              | 3        | 3                       | 166   | 175 | Carbamidomethylation (DHKE, X@N-term) | N1:Carbamidomethylation (DHKE, X@N-term):1000.00                                                              | PEAKS PTM |
| R.IFLAGDKNDVIDQ(+.98)IEKQAK.D                                     | N    | 58.20  | 2145.1316 | 19     | 1.4  | 716.0521  | 3 | 33.04 | 43       | F43:1686 | OB5956 H1 Ro.raw  | 1.2153E5            | 1        | 1                       | 536   | 554 | Deamidation (NQ)                      | Q13:Deamidation (NQ):25.1                                                                                     | PEAKS DB  |
| total 244 peptides                                                |      |        |           |        |      |           |   |       |          |          |                   |                     |          |                         |       |     |                                       |                                                                                                               |           |

| Peptide                                        | Uniq | -10lgP | Mass      | Length | ppm  | m/z       | z | RT    | Fraction | Scan     | Source File       | Area Roasted in gel | #Feature | #Feature Roasted in gel | Start | End | PTM                                   | AScore                                                  | Found By  |
|------------------------------------------------|------|--------|-----------|--------|------|-----------|---|-------|----------|----------|-------------------|---------------------|----------|-------------------------|-------|-----|---------------------------------------|---------------------------------------------------------|-----------|
|                                                |      |        |           |        |      |           |   |       |          |          |                   |                     |          |                         |       |     |                                       | 8                                                       |           |
| R.VAKISM(+15.99)PVNTPGQFEDFFPASSR.D            | N    | 57.67  | 2540.2368 | 23     | 2.1  | 847.7546  | 3 | 32.98 | 42       | F42:1665 | OB5955 H1 Ro.raw  | 1.5427E5            | 1        | 1                       | 279   | 301 | Oxidation (M)                         | M6:Oxidation (M):1000.00                                | PEAKS DB  |
| K.G(+57.02)TGNLELVAVR.K                        | N    | 57.51  | 1184.6514 | 11     | -2.7 | 593.3314  | 2 | 30.10 | 42       | F42:1486 | OB5955 H1 Ro.raw  | 1.7196E5            | 2        | 2                       | 453   | 463 |                                       | G1:Carbamidomethylation (DHKE, X@N-term):19.78          | PEAKS PTM |
| R.IFLAGD(+57.02)KDNVIDQIEK.Q                   | N    | 57.43  | 1873.9785 | 16     | 1.7  | 625.6678  | 3 | 32.52 | 41       | F41:1637 | OB5954 H1 Ro.raw  | 2.7943E5            | 3        | 3                       | 536   | 551 |                                       | D6:Carbamidomethylation (DHKE, X@N-term):15.57          | PEAKS PTM |
| R.IFLAGDK(+15.99)DNVIDQIEK.Q                   | N    | 57.39  | 1832.9519 | 16     | -1.9 | 917.4814  | 2 | 31.99 | 41       | F41:1600 | OB5954 H1 Ro.raw  | 7.5922E5            | 2        | 2                       | 536   | 551 |                                       | K7:Oxidation or Hydroxylation:17.01                     | PEAKS PTM |
| N.PFYFPSRR.F                                   | N    | 57.34  | 1068.5504 | 8      | 1.1  | 535.2831  | 2 | 28.95 | 41       | F41:1414 | OB5954 H1 Ro.raw  | 4.6082E6            | 5        | 5                       | 168   | 175 |                                       |                                                         | PEAKS DB  |
| R.K(+27.99)SFNLDEGHALR.I                       | N    | 57.29  | 1413.7001 | 12     | 1.4  | 707.8583  | 2 | 28.46 | 42       | F42:1387 | OB5955 H1 Ro.raw  | 2.9777E4            | 1        | 1                       | 248   | 259 | Formylation                           | K1:Formylation:1000.00                                  | PEAKS PTM |
| R.LFEVKPDKKNPQLQDLDM(+15.99)MLTC(+57.02)VEIK.E | N    | 57.09  | 3147.6018 | 26     | -1.9 | 787.9062  | 4 | 34.20 | 41       | F41:1734 | OB5954 H1 Ro.raw  | 2.4894E6            | 4        | 4                       | 406   | 431 | Oxidation (M); Carbamidomethylation   | M18:Oxidation (M):33.98;C2:Carbamidomethylation:1000.00 | PEAKS DB  |
| K.SFNLDEGHALR(+31.99).I                        | N    | 55.96  | 1289.6000 | 11     | -1.4 | 645.8063  | 2 | 30.41 | 43       | F43:1520 | OB5956 H1 Ro.raw  | 0                   | 0        | 0                       | 249   | 259 | Dihydroxy                             | R11:Dihydroxy:119.59                                    | PEAKS PTM |
| K.ISMPVN(+.98)TPGQFEDFFPASSR.D                 | N    | 55.55  | 2227.0254 | 20     | 6.6  | 1114.5273 | 2 | 36.77 | 41       | F41:1885 | OB5954 H1 Ro.raw  | 1.01E5              | 2        | 2                       | 282   | 301 | Deamidation (NQ)                      | N6:Deamidation (NQ):42.68                               | PEAKS DB  |
| R.NTLEAAFAEFN(+.98)EIRR.V                      | N    | 54.77  | 1894.9172 | 16     | 1.8  | 948.4676  | 2 | 33.04 | 43       | F43:1685 | OB5956 H1 Ro.raw  | 2.2573E6            | 5        | 5                       | 313   | 328 | Deamidation (NQ)                      | N12:Deamidation (NQ):39.02                              | PEAKS DB  |
| V.QIEARPNTLVLPK.H                              | Y    | 54.45  | 1477.8616 | 13     | -1.8 | 739.9368  | 2 | 30.56 | 41       | F41:1513 | OB5954 H1 Ro.raw  | 1.5146E5            | 3        | 3                       | 210   | 222 |                                       |                                                         | PEAKS DB  |
| K.S(+57.02)FNLDEGHALRIPSGFISYILNR.H            | N    | 54.19  | 2675.3818 | 23     | 2.3  | 892.8033  | 3 | 39.35 | 38       | F38:1901 | OB5951 H3A Ro.raw | 6.7035E5            | 1        | 1                       | 249   | 271 | Carbamidomethylation (DHKE, X@N-term) | S1:Carbamidomethylation (DHKE, X@N-term):63.97          | PEAKS PTM |
| R.IFLAGDKDNVIDQIEK(+57.02)QAK.D                | N    | 54.07  | 2201.1692 | 19     | 0.3  | 734.7306  | 3 | 32.48 | 43       | F43:1657 | OB5956 H1 Ro.raw  | 1.2122E6            | 3        | 3                       | 536   | 554 |                                       | K16:Carbamidomethylation (DHKE, X@N-term):11.12         | PEAKS PTM |
| R.I(+27.99)PSGFISYILNR.H                       | N    | 53.77  | 1406.7557 | 12     | 0.7  | 704.3856  | 2 | 42.27 | 42       | F42:2199 | OB5955 H1 Ro.raw  | 0                   | 0        | 0                       | 260   | 271 | Formylation                           | I1:Formylation:1000.00                                  | PEAKS PTM |
| R.SKQFQNLQNHR.I                                | Y    | 53.65  | 1398.7117 | 11     | 0.4  | 467.2447  | 3 | 24.16 | 43       | F43:1149 | OB5956 H1 Ro.raw  | 1.1379E5            | 3        | 3                       | 197   | 207 |                                       |                                                         | PEAKS DB  |
| R.IPSGFISYILNRHDN(+.98)QNLR.V                  | N    | 53.60  | 2257.1604 | 19     | -0.7 | 753.3936  | 3 | 34.26 | 41       | F41:1732 | OB5954 H1 Ro.raw  | 0                   | 0        | 0                       | 260   | 278 |                                       | N15:Deamidation (NQ):0.00                               | PEAKS DB  |
| K.HADADNILVIQQGQATVTVANGNNR.K                  | N    | 53.13  | 2618.3162 | 25     | 0.5  | 873.7798  | 3 | 30.34 | 38       | F38:1426 | OB5951 H3A Ro.raw | 1.8654E3            | 1        | 1                       | 223   | 247 |                                       |                                                         | PEAKS DB  |
| total 244 peptides                             |      |        |           |        |      |           |   |       |          |          |                   |                     |          |                         |       |     |                                       |                                                         |           |

| Peptide                                                | Uniq | -10lgP | Mass      | Length | ppm  | m/z       | z | RT    | Fraction | Scan     | Source File       | Area Roasted in gel | #Feature | #Feature Roasted in gel | Start | End | PTM                                   | AScore                                                                                | Found By  |
|--------------------------------------------------------|------|--------|-----------|--------|------|-----------|---|-------|----------|----------|-------------------|---------------------|----------|-------------------------|-------|-----|---------------------------------------|---------------------------------------------------------------------------------------|-----------|
| R.EGEQEWGTPGS(+42.01)EVR.E                             | Y    | 52.96  | 1601.6958 | 14     | 7.6  | 801.8613  | 2 | 27.46 | 43       | F43:1334 | OB5956 H1 Ro.raw  | 9.5213E4            | 3        | 3                       | 147   | 160 | Acetylation (TSCYH)                   | S11:Acetylation (TSCYH):32.97                                                         | PEAKS PTM |
| K.AM(+15.99)VIVVVKGTGNLELVAVRK.E                       | N    | 52.95  | 2225.2930 | 21     | -1.3 | 742.7706  | 3 | 32.42 | 42       | F42:1596 | OB5955 H1 Ro.raw  | 1.4247E6            | 3        | 3                       | 444   | 464 | Oxidation (M)                         | M2:Oxidation (M):1000.00                                                              | PEAKS DB  |
| K.KNPQLQ(+.98)DLDMMLTC(+57.02)VEIKEGALMLPHFNSK.A       | N    | 51.97  | 3500.7175 | 30     | 3.4  | 876.1896  | 4 | 36.93 | 43       | F43:1903 | OB5956 H1 Ro.raw  | 9.2646E6            | 2        | 2                       | 414   | 443 | Carbamidomethylation                  | Q6:Deamidation (N Q):14.04; C14:Carbamidomethylation:1000.00                          | PEAKS DB  |
| R.IFLAGDKDNVID.Q                                       | N    | 51.22  | 1318.6769 | 12     | -0.9 | 660.3451  | 2 | 31.76 | 43       | F43:1606 | OB5956 H1 Ro.raw  | 1.1173E5            | 3        | 3                       | 536   | 547 |                                       |                                                                                       | PEAKS DB  |
| K.ISM(+15.99)PVNTPGQFEDFFPASSRDQSSYLQGFSR.N            | N    | 50.25  | 3510.6150 | 31     | 0.3  | 1171.2126 | 3 | 35.35 | 36       | F36:1707 | OB5948 H3B Ro.raw | 2.4799E6            | 5        | 5                       | 282   | 312 | Oxidation (M)                         | M3:Oxidation (M):1000.00                                                              | PEAKS DB  |
| K.NPQLQLDMM(+15.99)LTC(+57.02)VEIKEGALMLPHFN(+.98)SK.A | N    | 49.99  | 3388.6174 | 29     | 6.1  | 848.1668  | 4 | 36.39 | 43       | F43:1880 | OB5956 H1 Ro.raw  | 1.7975E6            | 1        | 1                       | 415   | 443 | Oxidation (M); Carbamidomethylation   | M10:Oxidation (M):27.96; C13:Carbamidomethylation:1000.00; N27:Deamidation (NQ):18.27 | PEAKS DB  |
| R.N(-17.03)NPFYFSSRR.F                                 | N    | 49.99  | 1279.6097 | 10     | 1.1  | 427.5443  | 3 | 28.89 | 43       | F43:1434 | OB5956 H1 Ro.raw  | 5.674E5             | 3        | 3                       | 166   | 175 |                                       | N1:Ammonia-loss (N):9.34                                                              | PEAKS PTM |
| R.EQWEEEEEEEEGSNREVR.R                                 | N    | 49.84  | 2665.0535 | 21     | 2.4  | 889.3605  | 3 | 27.88 | 41       | F41:1353 | OB5954 H1 Ro.raw  | 4.9786E4            | 1        | 1                       | 473   | 493 |                                       |                                                                                       | PEAKS DB  |
| T.GNLELVAVRK.E                                         | N    | 49.53  | 1097.6556 | 10     | 0.5  | 549.8354  | 2 | 27.00 | 42       | F42:1296 | OB5955 H1 Ro.raw  | 3.4872E5            | 3        | 3                       | 455   | 464 |                                       |                                                                                       | PEAKS DB  |
| R.VAKIS(+77.99)MPVNTPGQFEDFFPASSR.D                    | N    | 49.16  | 2602.2290 | 23     | 3.0  | 1302.1257 | 2 | 38.06 | 42       | F42:1958 | OB5955 H1 Ro.raw  | 0                   | 0        | 0                       | 279   | 301 | Methylphosphorylation                 | S5:Methylphosphorylation:56.99                                                        | PEAKS PTM |
| F.PGSGEQVEK.L                                          | N    | 49.06  | 929.4454  | 9      | -3.7 | 465.7282  | 2 | 30.34 | 43       | F43:1524 | OB5956 H1 Ro.raw  | 5.2705E4            | 1        | 1                       | 559   | 567 |                                       |                                                                                       | PEAKS DB  |
| K.AMVIVVVK(+57.02)GTGNLELVAVRK.E                       | N    | 48.92  | 2266.3196 | 21     | 1.3  | 756.4481  | 3 | 33.23 | 43       | F43:1673 | OB5956 H1 Ro.raw  | 3.1193E6            | 1        | 1                       | 444   | 464 |                                       | K9:Carbamidomethylation (DHKE, X@N-term):8.78                                         | PEAKS PTM |
| R.EEDWRQPR.E                                           | N    | 48.87  | 1114.5155 | 8      | 1.8  | 558.2661  | 2 | 23.91 | 41       | F41:1112 | OB5954 H1 Ro.raw  | 1.6791E3            | 1        | 1                       | 120   | 127 |                                       |                                                                                       | PEAKS DB  |
| R.PNTLVLPK.H                                           | N    | 48.84  | 880.5382  | 8      | -2.9 | 441.2751  | 2 | 28.00 | 43       | F43:1374 | OB5956 H1 Ro.raw  | 1.9234E5            | 2        | 2                       | 215   | 222 |                                       |                                                                                       | PEAKS DB  |
| L.R(+27.99)IPSGFISYILNR.H                              | N    | 48.25  | 1562.8568 | 13     | -2.0 | 782.4341  | 2 | 37.84 | 43       | F43:1976 | OB5956 H1 Ro.raw  | 1.5108E5            | 1        | 1                       | 259   | 271 | Formylation                           | R1:Formylation:1000.00                                                                | PEAKS PTM |
| R.EGEQEW(+15.99)GTPGSEVREETSR.N                        | Y    | 48.10  | 2177.9460 | 19     | 1.6  | 726.9905  | 3 | 26.51 | 43       | F43:1296 | OB5956 H1 Ro.raw  | 8.9341E6            | 3        | 3                       | 147   | 165 | Oxidation (HW)                        | W6:Oxidation (HW):1000.00                                                             | PEAKS PTM |
| R.I(+57.02)VQIEARPNTLVLPK.H                            | Y    | 46.89  | 1747.0355 | 15     | -0.2 | 874.5248  | 2 | 30.98 | 42       | F42:1537 | OB5955 H1 Ro.raw  | 9.1688E5            | 3        | 3                       | 208   | 222 | Carbamidomethylation (DHKE, X@N-term) | I1:Carbamidomethylation (DHKE, X@N-term):69.71                                        | PEAKS PTM |
| total 244 peptides                                     |      |        |           |        |      |           |   |       |          |          |                   |                     |          |                         |       |     |                                       |                                                                                       |           |



| Peptide                                                   | Uniq | -10lgP | Mass      | Length | ppm  | m/z       | z | RT    | Fraction | Scan     | Source File      | Area Roasted in gel | #Feature | #Feature Roasted in gel | Start | End | PTM                                       | AScore                                                                                 | Found By  |
|-----------------------------------------------------------|------|--------|-----------|--------|------|-----------|---|-------|----------|----------|------------------|---------------------|----------|-------------------------|-------|-----|-------------------------------------------|----------------------------------------------------------------------------------------|-----------|
| R.N(+.98)TLEAFNAEFNEIR.R                                  | N    | 46.63  | 1738.8162 | 15     | 9.2  | 870.4233  | 2 | 44.36 | 42       | F42:2303 | OB5955 H1 Ro.raw | 5.4416E3            | 1        | 1                       | 313   | 327 | Deamidation (NQ)                          | N1:Deamidation (NQ):39.47                                                              | PEAKS DB  |
| R.VLLE(+21.98)ENAGGEQEER.G                                | N    | 46.37  | 1593.7246 | 14     | -1.1 | 797.8687  | 2 | 26.71 | 43       | F43:1300 | OB5956 H1 Ro.raw | 4.0134E5            | 3        | 3                       | 329   | 342 | Sodium adduct                             | E4:Sodium adduct:40.00                                                                 | PEAKS PTM |
| N.PFYFPSR.R                                               | N    | 46.32  | 912.4493  | 7      | -0.1 | 457.2319  | 2 | 31.70 | 42       | F42:1584 | OB5955 H1 Ro.raw | 2.4653E5            | 4        | 4                       | 168   | 174 |                                           |                                                                                        | PEAKS DB  |
| K.GTGNLELVAVRKEQQQR.G                                     | N    | 46.31  | 1925.0442 | 17     | 1.4  | 642.6896  | 3 | 26.67 | 43       | F43:1294 | OB5956 H1 Ro.raw | 2.1018E4            | 1        | 1                       | 453   | 469 |                                           |                                                                                        | PEAKS DB  |
| K.NPQLQDLD(+14.02)MMLTC(+57.02)VEIK.E                     | N    | 45.99  | 2060.9944 | 17     | 0.2  | 1031.5046 | 2 | 37.33 | 41       | F41:1934 | OB5954 H1 Ro.raw | 2.7407E4            | 1        | 1                       | 415   | 431 | Methylation(others); Carbamidomethylation | D8:Methylation(others):42.68; C13:Carbamidomethylation:1000.00                         | PEAKS PTM |
| K.GTGNLE(+57.02)LVAVRK.E                                  | N    | 45.75  | 1312.7462 | 12     | -0.8 | 657.3799  | 2 | 27.17 | 42       | F42:1295 | OB5955 H1 Ro.raw | 1.9882E5            | 1        | 1                       | 453   | 464 |                                           | E6:Carbamidomethylation (DHKE, X@N-term):0.00                                          | PEAKS PTM |
| K.A(+43.01)MVIVVVKGTGNLELVAVR.K                           | N    | 45.64  | 2124.2090 | 20     | 0.7  | 1063.1125 | 2 | 33.65 | 41       | F41:1688 | OB5954 H1 Ro.raw | 8.0739E4            | 1        | 1                       | 444   | 463 | Carbamylation                             | A1:Carbamylation:161.20                                                                | PEAKS PTM |
| R.VLLEEN(+.98)AGGEQEERGQR.R                               | N    | 45.60  | 1913.9078 | 17     | -1.6 | 638.9755  | 3 | 25.99 | 41       | F41:1234 | OB5954 H1 Ro.raw | 0                   | 0        | 0                       | 329   | 345 | Deamidation (NQ)                          | N6:Deamidation (NQ):28.79                                                              | PEAKS DB  |
| K.KNPQLQDLDM(+15.99)LTC(+57.02)VEIKEGALM(+15.99)LPHFNSK.A | N    | 45.45  | 3531.7234 | 30     | -1.1 | 883.9372  | 4 | 35.80 | 42       | F42:1822 | OB5955 H1 Ro.raw | 0                   | 0        | 0                       | 414   | 443 | Carbamidomethylation; Oxidation (M)       | M11:Oxidation (M):0.00;C14:Carbamidomethylation:1000.00;M23:Oxidation (M):45.87        | PEAKS DB  |
| R.LFEVKPKKNPQLQDLDM(+15.99)M(+15.99)LTC(+57.02)VEIK.E     | N    | 45.43  | 3163.5967 | 26     | -2.8 | 791.9042  | 4 | 32.90 | 41       | F41:1650 | OB5954 H1 Ro.raw | 2.0535E6            | 3        | 3                       | 406   | 431 | Oxidation (M); Carbamidomethylation       | M18:Oxidation (M):1000.00; M19:Oxidation (M):1000.00; C22:Carbamidomethylation:1000.00 | PEAKS DB  |
| R.KSFNLDEGH(+15.99)ALR.I                                  | N    | 45.40  | 1401.7001 | 12     | 3.9  | 701.8600  | 2 | 27.64 | 43       | F43:1349 | OB5956 H1 Ro.raw | 6.6479E4            | 2        | 2                       | 248   | 259 | Oxidation (HW)                            | H9:Oxidation (HW):1000.00                                                              | PEAKS PTM |
| K.KNPQLQDLDM(+15.99)MLTC(+57.02)VEIKEGALMLPHFNSK.A        | N    | 44.60  | 3515.7285 | 30     | -1.9 | 879.9377  | 4 | 35.30 | 41       | F41:1798 | OB5954 H1 Ro.raw | 6.4162E5            | 1        | 1                       | 414   | 443 | Carbamidomethylation                      | M10:Oxidation (M):14.02;C14:Carbamidomethylation:1000.00                               | PEAKS DB  |
| R.DQSSYLQGFSR(+15.99).N                                   | N    | 44.15  | 1302.5840 | 11     | 2.5  | 652.3009  | 2 | 30.79 | 43       | F43:1544 | OB5956 H1 Ro.raw | 1.4308E5            | 3        | 3                       | 302   | 312 | Oxidation or Hydroxylation                | R11:Oxidation or Hydroxylation:42.88                                                   | PEAKS PTM |
| K.Q(+.98)FQNLQNHR.I                                       | N    | 43.70  | 1184.5686 | 9      | 4.6  | 593.2943  | 2 | 23.68 | 42       | F42:1098 | OB5955 H1 Ro.raw | 0                   | 0        | 0                       | 199   | 207 | Deamidation (NQ)                          | Q1:Deamidation (NQ):39.25                                                              | PEAKS DB  |
| K.I(+57.02)SMPVNTPGQFEDFFPASSR.D                          | N    | 42.37  | 2283.0630 | 20     | -0.7 | 1142.5380 | 2 | 36.01 | 43       | F43:1860 | OB5956 H1 Ro.raw | 1.8515E5            | 1        | 1                       | 282   | 301 | Carbamidomethylation (DHKE, X@N-term)     | I1:Carbamidomethylation (DHKE, X@N-term):50.99                                         | PEAKS PTM |
| total 244 peptides                                        |      |        |           |        |      |           |   |       |          |          |                  |                     |          |                         |       |     |                                           |                                                                                        |           |

| Peptide                                                        | Uniq | -10lgP | Mass      | Length | ppm  | m/z       | z | RT    | Fraction | Scan     | Source File       | Area Roasted in gel | #Feature | #Feature Roasted in gel | Start | End | PTM                                                   | AScore                                                                                                     | Found By  |
|----------------------------------------------------------------|------|--------|-----------|--------|------|-----------|---|-------|----------|----------|-------------------|---------------------|----------|-------------------------|-------|-----|-------------------------------------------------------|------------------------------------------------------------------------------------------------------------|-----------|
| K.ISM(-48.00)PVNTPGQGFEDFFPASSR.D                              | N    | 42.09  | 2178.0381 | 20     | 2.8  | 727.0220  | 3 | 32.48 | 43       | F43:1652 | OB5956 H1 Ro.raw  | 5.8583E6            | 3        | 3                       | 282   | 301 | Dethiomethyl                                          | M3:Dethio methyl:1000.00                                                                                   | PEAKS PTM |
| R.SKQFQNLQNH(+15.99)R.I                                        | Y    | 41.84  | 1414.7065 | 11     | 2.4  | 708.3622  | 2 | 24.12 | 42       | F42:1124 | OB5955 H1 Ro.raw  | 1.2986E3            | 1        | 1                       | 197   | 207 | Oxidation (HW)                                        | H10:Oxidation (H W):1000.00                                                                                | PEAKS PTM |
| K.KGSEEEEDIT(-18.01)N(+.98)PINLR.D                             | N    | 41.27  | 1696.8268 | 15     | 2.3  | 566.6175  | 3 | 29.07 | 43       | F43:1442 | OB5956 H1 Ro.raw  | 3.8118E5            | 3        | 3                       | 379   | 393 | Dehydration; Deamidation (NQ)                         | T9:Dehydration:45.01;N10:Deamidation (NQ):59.10                                                            | PEAKS PTM |
| K.NPQLQDLDM(+15.99)LTC(+57.02)VEIKEGALM(+15.99)LPHFN(+.98)SK.A | N    | 41.25  | 3404.6125 | 29     | -0.4 | 1135.8777 | 3 | 36.69 | 42       | F42:1878 | OB5955 H1 Ro.raw  | 3.8423E5            | 1        | 1                       | 415   | 443 | Carbamidomethylation; Oxidation (M); Deamidation (NQ) | M10:Oxidation (M):0.00;C13:Carbamidomethylation:1000.00;M22:Oxidation (M):39.23;N27:Deamidation (NQ):69.52 | PEAKS DB  |
| R.REQEW(+15.99)EEEEEEEEEGSNR.E                                 | N    | 41.18  | 2452.9375 | 19     | -0.6 | 818.6526  | 3 | 25.98 | 41       | F41:1239 | OB5954 H1 Ro.raw  | 2.4114E4            | 1        | 1                       | 472   | 490 | Oxidation (HW)                                        | W5:Oxidation (H W):1000.00                                                                                 | PEAKS PTM |
| K.DLAFP(+15.99)GSGEQVEK.L                                      | N    | 41.14  | 1391.6569 | 13     | 0.5  | 696.8361  | 2 | 29.36 | 42       | F42:1432 | OB5955 H1 Ro.raw  | 7.4528E5            | 3        | 3                       | 555   | 567 | Oxidation or Hydroxylation                            | P5:Oxidation or Hydroxylation:67.76                                                                        | PEAKS PTM |
| K.AMVVVVN(+.98)KGTGNLELVAVRK.E                                 | N    | 41.03  | 2210.2820 | 21     | 1.9  | 1106.1504 | 2 | 34.35 | 42       | F42:1720 | OB5955 H1 Ro.raw  | 4.5718E5            | 1        | 1                       | 444   | 464 | Deamidation (NQ)                                      | N8:Deamidation (NQ):28.79                                                                                  | PEAKS DB  |
| K.EGALM(-48.00)LPHFNSK.A                                       | N    | 40.53  | 1294.6670 | 12     | 0.5  | 432.5632  | 3 | 28.76 | 41       | F41:1389 | OB5954 H1 Ro.raw  | 2.208E6             | 2        | 2                       | 432   | 443 | Dethiomethyl                                          | M5:Dethio methyl:1000.00                                                                                   | PEAKS PTM |
| R.VLLEENAGGEQEERGQRR.R                                         | N    | 40.17  | 2069.0249 | 18     | 1.0  | 518.2640  | 4 | 25.49 | 42       | F42:1205 | OB5955 H1 Ro.raw  | 2.0305E5            | 2        | 2                       | 329   | 346 |                                                       |                                                                                                            | PEAKS DB  |
| R.VLLEENAGGEQEER(+15.99).G                                     | N    | 39.98  | 1587.7375 | 14     | 1.8  | 794.8775  | 2 | 26.70 | 41       | F41:1275 | OB5954 H1 Ro.raw  | 0                   | 0        | 0                       | 329   | 342 | Oxidation or Hydroxylation                            | R14:Oxidation or Hydroxylation:20.88                                                                       | PEAKS PTM |
| R.N(+27.99)TLEAAFAEFNEIRR.V                                    | N    | 39.68  | 1921.9282 | 16     | -1.7 | 961.9697  | 2 | 37.51 | 41       | F41:1908 | OB5954 H1 Ro.raw  | 3.7767E4            | 1        | 1                       | 313   | 328 | Formylation                                           | N1:Formylation:1000.00                                                                                     | PEAKS PTM |
| K.E(-18.01)GALM(+15.99)LPHFNSK.A                               | N    | 39.64  | 1340.6547 | 12     | 0.2  | 447.8923  | 3 | 30.21 | 41       | F41:1479 | OB5954 H1 Ro.raw  | 7.81E5              | 1        | 1                       | 432   | 443 | Pyro-glu from E; Oxidation (M)                        | E1:Pyro-glu from E:1000.00; M5:Oxidation (M):1000.00                                                       | PEAKS PTM |
| R.VLLEE(+53.92)NAGGEQEER.G                                     | N    | 39.58  | 1625.6620 | 14     | -1.0 | 542.8940  | 3 | 26.76 | 42       | F42:1278 | OB5955 H1 Ro.raw  | 0                   | 0        | 0                       | 329   | 342 | Replacement of 2 protons by iron                      | E5:Replacement of 2 protons by iron:20.92                                                                  | PEAKS PTM |
| D.GEPDLSNNFGR.L                                                | N    | 39.46  | 1204.5472 | 11     | 3.0  | 603.2827  | 2 | 28.20 | 41       | F41:1371 | OB5954 H1 Ro.raw  | 1.5511E4            | 1        | 1                       | 395   | 405 |                                                       |                                                                                                            | PEAKS DB  |
| K.HADADNIIQQGQ(+.98)ATVTVANGNNRK.S                             | N    | 39.33  | 2747.3950 | 26     | 2.6  | 916.8103  | 3 | 30.46 | 30       | F30:1280 | OB5926 H3B Ro.raw | 0                   | 0        | 0                       | 223   | 248 |                                                       | Q14:Deamidation (NQ):5.07                                                                                  | PEAKS DB  |
| K.NPQLQ(+.98)DLDM(+15.99)LTC(+57.02)VEIKEGALM(+15.99)LPHFNSK.A | N    | 39.15  | 3404.6125 | 29     | -1.8 | 852.1589  | 4 | 38.22 | 43       | F43:1993 | OB5956 H1 Ro.raw  | 7.6266E5            | 1        | 1                       | 415   | 443 | Deamidation (NQ); Carbamidomethylation                | Q5:Deamidation (NQ):49.79; M10:Oxidation (M):0.00;C13:                                                     | PEAKS DB  |
| total 244 peptides                                             |      |        |           |        |      |           |   |       |          |          |                   |                     |          |                         |       |     |                                                       |                                                                                                            |           |

| Peptide                                                 | Uniq | -10lgP | Mass      | Length | ppm  | m/z       | z | RT    | Fraction | Scan     | Source File      | Area Roasted in gel | #Feature | #Feature Roasted in gel | Start | End | PTM                               | AScore                                                                          | Found By  |
|---------------------------------------------------------|------|--------|-----------|--------|------|-----------|---|-------|----------|----------|------------------|---------------------|----------|-------------------------|-------|-----|-----------------------------------|---------------------------------------------------------------------------------|-----------|
|                                                         |      |        |           |        |      |           |   |       |          |          |                  |                     |          |                         |       |     |                                   | Carbamidomethylation:1000.00;M22:Oxidation (M):14.60                            |           |
| K.N(+.98)PQLQDLDM(+15.99)MLTC(+57.02)VEIKEGALMLPHFNSK.A | N    | 38.83  | 3388.6174 | 29     | 8.2  | 1695.3300 | 2 | 37.72 | 41       | F41:1941 | OB5954 H1 Ro.raw | 6.4698E5            | 1        | 1                       | 415   | 443 | Carbamidomethylation              | N1:Deamidation (NQ):0.00;M9:Oxidation (M):0.00;C13:Carbamidomethylation:1000.00 | PEAKS DB  |
| K.D(+15.99)LAFPGSGEQVEK.L                               | N    | 38.81  | 1391.6569 | 13     | 0.5  | 696.8361  | 2 | 29.36 | 42       | F42:1368 | OB5955 H1 Ro.raw | 2.5725E5            | 1        | 1                       | 555   | 567 | Oxidation or Hydroxylation        | D1:Oxidation or Hydroxylation:77.13                                             | PEAKS PTM |
| K.NPQ(+.98)LQDLDMMLTC(+57.02)VEIK.E                     | N    | 38.70  | 2047.9629 | 17     | 2.9  | 1024.9917 | 2 | 46.45 | 41       | F41:2441 | OB5954 H1 Ro.raw | 0                   | 0        | 0                       | 415   | 431 | Carbamidomethylation              | Q3:Deamidation (NQ):14.04;C13:Carbamidomethylation:1000.00                      | PEAKS DB  |
| R.IFLAGD(+15.99)KDNVIDQIEK.Q                            | N    | 38.52  | 1832.9519 | 16     | 1.9  | 917.4850  | 2 | 31.89 | 42       | F42:1590 | OB5955 H1 Ro.raw | 4.6198E5            | 1        | 1                       | 536   | 551 |                                   | D6:Oxidation or Hydroxylation:12.60                                             | PEAKS PTM |
| R.IFLAGDKDN(+.98)VIDQIEKQ(+.98)AK.D                     | N    | 37.85  | 2146.1157 | 19     | 9.8  | 716.3862  | 3 | 32.98 | 42       | F42:1661 | OB5955 H1 Ro.raw | 8.6625E4            | 1        | 1                       | 536   | 554 |                                   | N9:Deamidation (NQ):13.83;Q17:Deamidation (NQ):17.65                            | PEAKS DB  |
| K.DLAFPGSGE(+53.92)QVEK.L                               | N    | 37.31  | 1429.5812 | 13     | -6.3 | 715.7933  | 2 | 30.34 | 43       | F43:1518 | OB5956 H1 Ro.raw | 2.6492E5            | 1        | 1                       | 555   | 567 | Replacement of 2 protons by iron  | E9:Replacement of 2 protons by iron:37.54                                       | PEAKS PTM |
| R.W(+15.99)GPAEPR.E                                     | Y    | 36.73  | 827.3926  | 7      | 0.0  | 414.7036  | 2 | 24.54 | 42       | F42:1155 | OB5955 H1 Ro.raw | 3.7087E3            | 1        | 1                       | 109   | 115 | Oxidation (HW)                    | W1:Oxidation (HW):1000.00                                                       | PEAKS PTM |
| K.GT(-18.01)GNLELVAVRK.E                                | N    | 36.73  | 1237.7142 | 12     | 2.6  | 413.5797  | 3 | 27.00 | 42       | F42:1287 | OB5955 H1 Ro.raw | 4.7714E5            | 1        | 1                       | 453   | 464 | Dehydration                       | T2:Dehydration:1000.00                                                          | PEAKS PTM |
| K.IRPEGREGGEQEWGTPGSEVREETSR.N                          | Y    | 36.52  | 2870.3542 | 25     | 2.3  | 718.5975  | 4 | 27.83 | 43       | F43:1355 | OB5956 H1 Ro.raw | 1.3647E5            | 1        | 1                       | 141   | 165 |                                   |                                                                                 | PEAKS DB  |
| R.NT(-18.01)LEAAFAEFNEIRR.V                             | N    | 36.45  | 1875.9227 | 16     | 0.7  | 626.3153  | 3 | 34.16 | 43       | F43:1739 | OB5956 H1 Ro.raw | 6.9172E6            | 2        | 2                       | 313   | 328 | Dehydration                       | T2:Dehydration:1000.00                                                          | PEAKS PTM |
| K.EGALM(+15.99)LPHFN(+.98)SK.A                          | N    | 36.41  | 1359.6493 | 12     | 2.8  | 680.8338  | 2 | 31.22 | 41       | F41:1550 | OB5954 H1 Ro.raw | 0                   | 0        | 0                       | 432   | 443 | Oxidation (M); Deamidation (NQ)   | M5:Oxidation (M):1000.00;N10:Deamidation (NQ):1000.00                           | PEAKS DB  |
| R.DQSSY(-18.01)LQGFSR.N                                 | N    | 36.32  | 1268.5785 | 11     | -0.6 | 635.2961  | 2 | 30.85 | 43       | F43:1579 | OB5956 H1 Ro.raw | 2.378E5             | 1        | 1                       | 302   | 312 |                                   | Y5:Dehydration:0.00                                                             | PEAKS PTM |
| R.C(+57.02)LQS(-18.01)C(+57.02)Q(+.98)QEPDDLKQK.A       | N    | 36.24  | 1858.8190 | 15     | -0.1 | 930.4167  | 2 | 28.47 | 31       | F31:1350 | OB5942 H6 Ro.raw | 0                   | 0        | 0                       | 40    | 54  | Carbamidomethylation; Dehydration | C1:Carbamidomethylation:1000.00;S4:Dehydration:39.55;C5:Carbamidomethylation:10 | PEAKS PTM |
| total 244 peptides                                      |      |        |           |        |      |           |   |       |          |          |                  |                     |          |                         |       |     |                                   |                                                                                 |           |

| Peptide                                                 | Uniq | -10lgP | Mass      | Length | ppm  | m/z       | z | RT    | Fraction | Scan     | Source File      | Area Roasted in gel | #Feature | #Feature Roasted in gel | Start | End | PTM                  | AScore                                                                               | Found By  |
|---------------------------------------------------------|------|--------|-----------|--------|------|-----------|---|-------|----------|----------|------------------|---------------------|----------|-------------------------|-------|-----|----------------------|--------------------------------------------------------------------------------------|-----------|
|                                                         |      |        |           |        |      |           |   |       |          |          |                  |                     |          |                         |       |     |                      | 00.00;Q6: Deamidation (NQ): 8.69                                                     |           |
| M.LPHFNSK.A                                             | N    | 36.02  | 841.4446  | 7      | 1.3  | 421.7301  | 2 | 30.63 | 42       | F42:1510 | OB5955 H1 Ro.raw | 1.4673E6            | 2        | 2                       | 437   | 443 |                      |                                                                                      | PEAKS DB  |
| K.NPQLQLDLM(-48.00)MLTC(+57.02)VEIK.E                   | N    | 35.81  | 1998.9755 | 17     | 6.7  | 667.3369  | 3 | 34.52 | 43       | F43:1773 | OB5956 H1 Ro.raw | 8.4276E5            | 1        | 1                       | 415   | 431 | Carbamidomethylation | M9:Dethio methyl:1 1.06;C13: Carbamidomethylation:1000.00                            | PEAKS PTM |
| K.SF(+17.99)NLDEGHALR.I                                 | N    | 34.75  | 1275.6007 | 11     | 8.1  | 638.8128  | 2 | 26.62 | 42       | F42:1267 | OB5955 H1 Ro.raw | 9.5828E3            | 1        | 1                       | 249   | 259 | Fluorination         | F2:Fluorination:1000.00                                                              | PEAKS PTM |
| K.KNPQLQ(+.98)DLDM(+15.99)LTC(+57.02)VEIKEGALMLPHFNSK.A | N    | 33.72  | 3516.7124 | 30     | 3.3  | 880.1883  | 4 | 35.48 | 41       | F41:1798 | OB5954 H1 Ro.raw | 7.5658E5            | 1        | 1                       | 414   | 443 | Carbamidomethylation | Q6:Deamidation (NQ):18.55; M11:Oxidation (M): 14.02;C14:Carbamidomethylation:1000.00 | PEAKS DB  |
| K.VSKEH(+15.99)VQELTK.H                                 | N    | 33.71  | 1312.6986 | 11     | 1.8  | 657.3578  | 2 | 23.73 | 42       | F42:1100 | OB5955 H1 Ro.raw | 1.3581E3            | 1        | 1                       | 361   | 371 | Oxidation (HW)       | H5:Oxidation (HW): 1000.00                                                           | PEAKS PTM |
| D.QSSYLQGFSR.N                                          | N    | 33.26  | 1171.5621 | 10     | 2.1  | 586.7896  | 2 | 29.36 | 42       | F42:1431 | OB5955 H1 Ro.raw | 3.3134E4            | 1        | 1                       | 303   | 312 |                      |                                                                                      | PEAKS DB  |
| R.IFLAGDKDNVID(-18.01)QIEK.Q                            | N    | 33.09  | 1798.9464 | 16     | 0.7  | 900.4811  | 2 | 31.39 | 43       | F43:1591 | OB5956 H1 Ro.raw | 6.7846E4            | 1        | 1                       | 536   | 551 |                      | D12:Dehydration:13.16                                                                | PEAKS PTM |
| R.EREEDWRQPR.E                                          | N    | 32.92  | 1399.6592 | 10     | 5.7  | 700.8409  | 2 | 24.05 | 43       | F43:1141 | OB5956 H1 Ro.raw | 4.1173E4            | 1        | 1                       | 118   | 127 |                      |                                                                                      | PEAKS DB  |
| D.NVIDQIEK.Q                                            | N    | 32.64  | 957.5131  | 8      | 1.6  | 479.7646  | 2 | 28.19 | 42       | F42:1367 | OB5955 H1 Ro.raw | 3.0062E3            | 1        | 1                       | 544   | 551 |                      |                                                                                      | PEAKS DB  |
| K.AM(-48.00)VIVVVNK.G                                   | N    | 32.49  | 923.5804  | 9      | 0.0  | 462.7975  | 2 | 25.00 | 43       | F43:1192 | OB5956 H1 Ro.raw | 6.3177E3            | 1        | 1                       | 444   | 452 | Dethiomethyl         | M2:Dethio methyl:1000.00                                                             | PEAKS PTM |
| R.D(-18.01)QSSYLQGFSR.N                                 | N    | 31.95  | 1268.5785 | 11     | 1.6  | 635.2975  | 2 | 29.92 | 43       | F43:1489 | OB5956 H1 Ro.raw | 0                   | 0        | 0                       | 302   | 312 |                      | D1:Dehydration:0.00                                                                  | PEAKS PTM |
| R.IFLAGDKD(-18.01)NVIDQIEK.Q                            | N    | 31.82  | 1798.9464 | 16     | -0.9 | 600.6555  | 3 | 32.15 | 43       | F43:1589 | OB5956 H1 Ro.raw | 3.5634E5            | 1        | 1                       | 536   | 551 | Dehydration          | D8:Dehydration:30.83                                                                 | PEAKS PTM |
| K.D(+53.92)LAPPGSGEQVEK.L                               | N    | 31.27  | 1429.5812 | 13     | -4.3 | 715.7948  | 2 | 30.56 | 41       | F41:1500 | OB5954 H1 Ro.raw | 3.7719E5            | 1        | 1                       | 555   | 567 |                      | D1:Replacement of 2 protons by iron:0.00                                             | PEAKS PTM |
| K.SFNLDE(+53.92)GHALR.I                                 | N    | 31.27  | 1311.5294 | 11     | 1.0  | 438.1842  | 3 | 28.04 | 41       | F41:1362 | OB5954 H1 Ro.raw | 5.8053E4            | 1        | 1                       | 249   | 259 |                      | E6:Replacement of 2 protons by iron:16.90                                            | PEAKS PTM |
| K.AM(+15.99)VIVVVNK(+57.02)GTGNLELVAVR.K                | N    | 30.97  | 2154.2195 | 20     | 2.8  | 1078.1200 | 2 | 32.98 | 42       | F42:1664 | OB5955 H1 Ro.raw | 2.0029E5            | 1        | 1                       | 444   | 463 | Oxidation (M)        | M2:Oxidation (M):1000.00;K9:Carbamidomethylation (DHKE, X@N-term):0.00               | PEAKS PTM |
| K.KNPQLQLDMM(+15.99)LTC(+57.02)VEIKEGALMLPHFNSK.A       | N    | 30.83  | 3515.7285 | 30     | 1.3  | 879.9406  | 4 | 35.25 | 42       | F42:1790 | OB5955 H1 Ro.raw | 0                   | 0        | 0                       | 414   | 443 | Carbamidomethylation | M11:Oxidation (M): 12.28;C1                                                          | PEAKS DB  |
| total 244 peptides                                      |      |        |           |        |      |           |   |       |          |          |                  |                     |          |                         |       |     |                      |                                                                                      |           |

| Peptide                                                                | Uniq | -10lgP | Mass      | Length | ppm  | m/z      | z | RT    | Fraction | Scan     | Source File       | Area Roasted in gel | #Feature | #Feature Roasted in gel | Start | End | PTM                                 | AScore                                                                                                             | Found By  |
|------------------------------------------------------------------------|------|--------|-----------|--------|------|----------|---|-------|----------|----------|-------------------|---------------------|----------|-------------------------|-------|-----|-------------------------------------|--------------------------------------------------------------------------------------------------------------------|-----------|
|                                                                        |      |        |           |        |      |          |   |       |          |          |                   |                     |          |                         |       |     |                                     | 4:Carbamidomethylation:1000.00                                                                                     |           |
| R.DQSSY(+15.99)LQGFSR.N                                                | N    | 30.72  | 1302.5840 | 11     | 1.6  | 652.3003 | 2 | 29.24 | 43       | F43:1470 | OB5956 H1 Ro.raw  | 6.7205E4            | 1        | 1                       | 302   | 312 | Oxidation or Hydroxylation          | Y5:Oxidation or Hydroxylation:26.36                                                                                | PEAKS PTM |
| K.SFNLDEGHALRIPSGFISYILNRHDNQ(+.98)LR.V                                | N    | 30.43  | 3496.7600 | 30     | 4.9  | 700.3627 | 5 | 37.51 | 39       | F39:1925 | OB5952 H3A Ro.raw | 2.7478E5            | 1        | 1                       | 249   | 278 |                                     | N28:Deamidation (NQ):10.11                                                                                         | PEAKS DB  |
| D.KDNVIDQIEK.Q                                                         | N    | 30.42  | 1200.6350 | 10     | -0.3 | 601.3246 | 2 | 26.31 | 42       | F42:1252 | OB5955 H1 Ro.raw  | 0                   | 0        | 0                       | 542   | 551 |                                     |                                                                                                                    | PEAKS DB  |
| N.TLEAAFNAEFNEIRR.V                                                    | N    | 30.42  | 1779.8904 | 15     | 3.5  | 890.9556 | 2 | 33.23 | 43       | F43:1696 | OB5956 H1 Ro.raw  | 1.5374E5            | 1        | 1                       | 314   | 328 |                                     |                                                                                                                    | PEAKS DB  |
| R.IPSGFISYILN(+15.99)R.H                                               | N    | 30.30  | 1394.7557 | 12     | -2.8 | 698.3832 | 2 | 36.42 | 41       | F41:1875 | OB5954 H1 Ro.raw  | 3.8045E5            | 1        | 1                       | 260   | 271 |                                     | N11:Oxidation or Hydroxylation:0.00                                                                                | PEAKS PTM |
| W.GTPGSEVREETS.R                                                       | Y    | 30.01  | 1403.6641 | 13     | 3.8  | 702.8420 | 2 | 27.77 | 42       | F42:1332 | OB5955 H1 Ro.raw  | 2.719E4             | 1        | 1                       | 153   | 165 |                                     |                                                                                                                    | PEAKS DB  |
| R.IFLAGDKD(-18.01)NV.I                                                 | N    | 30.00  | 1072.5553 | 10     | 0.7  | 537.2853 | 2 | 32.26 | 42       | F42:1603 | OB5955 H1 Ro.raw  | 2.1452E6            | 1        | 1                       | 536   | 545 | Dehydration                         | D8:Dehydration:45.01                                                                                               | PEAKS PTM |
| R.NTLEAAFNAEFN(+15.99)EIRR.V                                           | N    | 29.99  | 1909.9282 | 16     | 0.9  | 955.9723 | 2 | 32.98 | 42       | F42:1662 | OB5955 H1 Ro.raw  | 2.366E6             | 2        | 2                       | 313   | 328 |                                     | N12:Oxidation or Hydroxylation:0.00                                                                                | PEAKS PTM |
| R.IFLAGDKDNVIDQ(+.98)IEK.Q                                             | N    | 29.73  | 1817.9410 | 16     | 7.7  | 909.9848 | 2 | 63.08 | 43       | F43:3435 | OB5956 H1 Ro.raw  | 3.1606E3            | 1        | 1                       | 536   | 551 |                                     | Q13:Deamidation (NQ):11.12                                                                                         | PEAKS DB  |
| I.F(+127.06)LAGDKDNVIDQIEK.Q                                           | N    | 29.59  | 1830.9363 | 15     | 0.7  | 916.4761 | 2 | 32.18 | 41       | F41:1600 | OB5954 H1 Ro.raw  | 6.5822E4            | 1        | 1                       | 537   | 551 | N-Succinimidyl-2-morpholine acetate | F1:N-Succinimidyl-2-morpholine acetate:28.79                                                                       | PEAKS PTM |
| K.N(+.98)PQLQ(+.98)DLDMMLTC(+57.02)VEIKEGALM(+15.99)LPHFNSK.A          | N    | 29.50  | 3389.6016 | 29     | 9.6  | 848.4158 | 4 | 37.65 | 43       | F43:2047 | OB5956 H1 Ro.raw  | 6.1505E6            | 1        | 1                       | 415   | 443 | Carbamidomethylation                | N1:Deamidation (NQ):0.00;Q5:Deamidation (NQ):14.04;C13:Carbamidomethylation:1000.00;M22:Oxidation (M):0.00         | PEAKS DB  |
| R.NN(+.98)PFYFPSRR.F                                                   | N    | 29.19  | 1297.6204 | 10     | 9.3  | 649.8235 | 2 | 62.71 | 43       | F43:3425 | OB5956 H1 Ro.raw  | 0                   | 0        | 0                       | 166   | 175 |                                     | N2:Deamidation (NQ):7.21                                                                                           | PEAKS DB  |
| R.NTLEAAFNAEFN(+.98)EIR.R                                              | N    | 29.07  | 1738.8162 | 15     | 9.2  | 870.4233 | 2 | 44.36 | 42       | F42:2331 | OB5955 H1 Ro.raw  | 5.4416E3            | 1        | 1                       | 313   | 327 |                                     | N12:Deamidation (NQ):0.00                                                                                          | PEAKS DB  |
| K.KNPQ(+.98)LQ(+.98)DLDMM(+15.99)LTC(+57.02)VEIKEGALM(+15.99)LPHFNSK.A | N    | 28.74  | 3533.6914 | 30     | 9.7  | 884.4387 | 4 | 35.77 | 42       | F42:1822 | OB5955 H1 Ro.raw  | 2.7541E5            | 1        | 1                       | 414   | 443 | Carbamidomethylation; Oxidation (M) | Q4:Deamidation (NQ):8.22;Q6:Deamidation (NQ):5.55;M11:Oxidation (M):0.00;C14:C carbamidomethylation:1000.00;M23:Ox | PEAKS DB  |

total 244 peptides

| Peptide            | Uniq | -10lgP | Mass | Length | ppm | m/z | z | RT | Fraction | Scan | Source File | Area Roasted in gel | #Feature | #Feature Roasted in gel | Start | End | PTM | AScore            | Found By |
|--------------------|------|--------|------|--------|-----|-----|---|----|----------|------|-------------|---------------------|----------|-------------------------|-------|-----|-----|-------------------|----------|
|                    |      |        |      |        |     |     |   |    |          |      |             |                     |          |                         |       |     |     | idation (M):38.29 |          |
| total 244 peptides |      |        |      |        |     |     |   |    |          |      |             |                     |          |                         |       |     |     |                   |          |

Q6PSU3|Q6PSU3\_ARAHY

back to list

| [Protein Coverage](#) | [Supporting Peptides](#) |

Protein Coverage:



## Supporting Peptides:

| Peptide                                       | Uniq | -10lgP | Mass      | Length | ppm  | m/z       | z | RT    | Fraction | Scan     | Source File       | Area Roasted in gel | #Feature | #Feature Roasted in gel | Start | End | PTM                                 | AScore                                                                                       | Found By |
|-----------------------------------------------|------|--------|-----------|--------|------|-----------|---|-------|----------|----------|-------------------|---------------------|----------|-------------------------|-------|-----|-------------------------------------|----------------------------------------------------------------------------------------------|----------|
| K.KNPQLQDLDMMLTC(+57.02)VEIK.E                | N    | 136.41 | 2175.0737 | 18     | 1.4  | 1088.5457 | 2 | 35.26 | 43       | F43:1808 | OB5956 H1 Ro.raw  | 1.4906E7            | 6        | 6                       | 414   | 431 | Carbamidomethylation                | C14:Carb amidomet hylation:1 000.00                                                          | PEAKS DB |
| R.NTLEAFNAEFNEIR.R                            | N    | 130.93 | 1737.8322 | 15     | 1.8  | 869.9249  | 2 | 35.34 | 38       | F38:1714 | OB5951 H3A Ro.raw | 1.332E7             | 16       | 16                      | 313   | 327 |                                     |                                                                                              | PEAKS DB |
| K.GSEEEITNPINLRDGEPLSNFGR.L                   | N    | 129.76 | 2887.3220 | 26     | -0.7 | 963.4473  | 3 | 32.67 | 43       | F43:1660 | OB5956 H1 Ro.raw  | 1.2475E7            | 11       | 11                      | 380   | 405 |                                     |                                                                                              | PEAKS DB |
| K.NPQLQDLDMMLTC(+57.02)VEIK.E                 | N    | 128.40 | 2046.9788 | 17     | 0.2  | 1024.4968 | 2 | 37.11 | 43       | F43:1936 | OB5956 H1 Ro.raw  | 3.4643E7            | 10       | 10                      | 415   | 431 | Carbamidomethylation                | C13:Carb amidomet hylation:1 000.00                                                          | PEAKS DB |
| K.NPQLQDLDM(+15.99)MLTC(+57.02)VEIK.E         | N    | 128.16 | 2062.9736 | 17     | -4.2 | 1032.4897 | 2 | 36.93 | 43       | F43:1892 | OB5956 H1 Ro.raw  | 3.3834E6            | 3        | 3                       | 415   | 431 | Oxidation (M); Carbamidomethylation | M9:Oxidat ion (M):3 0.46;C13: Carbami domethyla tion:1000. 00                                | PEAKS DB |
| K.NPQLQDLDM(+15.99)LTC(+57.02)VEIK.E          | N    | 127.13 | 2062.9736 | 17     | 5.0  | 1032.4993 | 2 | 34.71 | 43       | F43:1780 | OB5956 H1 Ro.raw  | 1.0665E7            | 4        | 4                       | 415   | 431 | Oxidation (M); Carbamidomethylation | M10:Oxid ation (M): 30.46;C1 3:Carbami domethyla tion:1000. 00                               | PEAKS DB |
| K.ISM(+15.99)PVNTPGQGFEDFFPASSR.D             | N    | 127.11 | 2242.0364 | 20     | 0.1  | 1122.0284 | 2 | 34.52 | 30       | F30:1521 | OB5926 H3B Ro.raw | 2.1708E7            | 14       | 13                      | 282   | 301 | Oxidation (M)                       | M3:Oxidat ion (M):1 000.00                                                                   | PEAKS DB |
| R.EQEWEEEEEEEEEGSNR.E                         | N    | 125.55 | 2280.8413 | 18     | 3.9  | 1141.4324 | 2 | 28.35 | 43       | F43:1396 | OB5956 H1 Ro.raw  | 4.3429E6            | 7        | 7                       | 473   | 490 |                                     |                                                                                              | PEAKS DB |
| K.ISMPVNTPGQGFEDFFPASSR.D                     | N    | 125.26 | 2226.0415 | 20     | 0.7  | 1114.0288 | 2 | 35.83 | 43       | F43:1868 | OB5956 H1 Ro.raw  | 8.8227E7            | 23       | 23                      | 282   | 301 |                                     |                                                                                              | PEAKS DB |
| K.HADADNIIQQGQATVTVAN(+.98)GNNRK.S            | N    | 123.10 | 2747.3950 | 26     | 3.3  | 916.8087  | 3 | 29.62 | 43       | F43:1472 | OB5956 H1 Ro.raw  | 4.4266E6            | 11       | 11                      | 223   | 248 | Deamidation (NQ)                    | N21:Dea midation (NQ):31.9 1                                                                 | PEAKS DB |
| K.NPQLQDLDM(+15.99)M(+15.99)LTC(+57.02)VEIK.E | N    | 121.59 | 2078.9688 | 17     | 6.6  | 1040.4985 | 2 | 33.82 | 43       | F43:1726 | OB5956 H1 Ro.raw  | 6.8984E4            | 2        | 2                       | 415   | 431 | Oxidation (M); Carbamidomethylation | M9:Oxidat ion (M):1 000.00;M 10:Oxidati on (M):10 00.00;C1 3:Carbami domethyla tion:1000. 00 | PEAKS DB |
| K.SFNLDEGHALRIPSGFISYILNR.H                   | N    | 121.49 | 2618.3604 | 23     | 1.0  | 873.7949  | 3 | 37.51 | 41       | F41:1949 | OB5954 H1 Ro.raw  | 9.1637E7            | 28       | 28                      | 249   | 271 |                                     |                                                                                              | PEAKS DB |
| K.KNPQLQDLDM(+15.99)MLTC(+57.02)VEIK.E        | N    | 118.68 | 2191.0686 | 18     | 3.6  | 1096.5455 | 2 | 34.71 | 43       | F43:1781 | OB5956 H1 Ro.raw  | 1.3598E6            | 4        | 4                       | 414   | 431 | Oxidation (M); Carbamidomethylation | M10:Oxid ation (M): 27.96;C1 4:Carbami domethyla tion:1000. 00                               | PEAKS DB |
| K.AMVIVVVNKGTLNLELVAVR.K                      | N    | 114.87 | 2081.2031 | 20     | -1.0 | 1041.6078 | 2 | 34.35 | 43       | F43:1758 | OB5956 H1 Ro.raw  | 3.8361E7            | 13       | 13                      | 444   | 463 |                                     |                                                                                              | PEAKS DB |
| R.IFLAGDKDNVIDQIEK.Q                          | N    | 110.41 | 1816.9570 | 16     | -1.1 | 909.4848  | 2 | 32.67 | 43       | F43:1648 | OB5956 H1 Ro.raw  | 4.2419E8            | 56       | 55                      | 536   | 551 |                                     |                                                                                              | PEAKS DB |
| total 244 peptides                            |      |        |           |        |      |           |   |       |          |          |                   |                     |          |                         |       |     |                                     |                                                                                              |          |



| Peptide                                 | Uniq | -10lgP | Mass      | Length | ppm  | m/z       | z | RT    | Fraction | Scan     | Source File       | Area Roasted in gel | #Feature | #Feature Roasted in gel | Start | End | PTM                                   | AScore                                                   | Found By  |
|-----------------------------------------|------|--------|-----------|--------|------|-----------|---|-------|----------|----------|-------------------|---------------------|----------|-------------------------|-------|-----|---------------------------------------|----------------------------------------------------------|-----------|
| K.KNPQLQDLDMML(+15.99)LTC(+57.02)VEIK.E | N    | 110.35 | 2191.0686 | 18     | 3.5  | 1096.5454 | 2 | 32.98 | 42       | F42:1657 | OB5955 H1 Ro.raw  | 1.6495E6            | 4        | 4                       | 414   | 431 | Oxidation (M); Carbamidomethylation   | M11:Oxidation (M):23.10;C14:Carbamidomethylation:1000.00 | PEAKS DB  |
| K.KGSEEDITNPINLRDGEPLSNNFGR.L           | N    | 109.79 | 3015.4170 | 27     | 3.4  | 1006.1497 | 3 | 31.62 | 41       | F41:1565 | OB5954 H1 Ro.raw  | 1.1559E7            | 21       | 21                      | 379   | 405 |                                       |                                                          | PEAKS DB  |
| R.IPSGFSYILNR.H                         | N    | 109.18 | 1378.7609 | 12     | 2.5  | 690.3894  | 2 | 36.50 | 38       | F38:1780 | OB5951 H3A Ro.raw | 4.4166E8            | 20       | 20                      | 260   | 271 |                                       |                                                          | PEAKS DB  |
| K.HADADNILVIQQGQATVTVANGNNRK.S          | N    | 108.34 | 2746.4111 | 26     | 1.9  | 916.4794  | 3 | 29.61 | 43       | F43:1451 | OB5956 H1 Ro.raw  | 3.8404E6            | 5        | 5                       | 223   | 248 |                                       |                                                          | PEAKS DB  |
| R.VLLEENAGGEQEER.G                      | N    | 108.33 | 1571.7427 | 14     | 2.4  | 786.8805  | 2 | 26.83 | 42       | F42:1293 | OB5955 H1 Ro.raw  | 2.9858E7            | 10       | 10                      | 329   | 342 |                                       |                                                          | PEAKS DB  |
| R.KSFNLDEGHALR.I                        | N    | 108.28 | 1385.7051 | 12     | 0.6  | 462.9092  | 3 | 26.14 | 43       | F43:1252 | OB5956 H1 Ro.raw  | 5.3666E6            | 6        | 6                       | 248   | 259 |                                       |                                                          | PEAKS DB  |
| K.AMVIVVVKGTGNLELVAVRK.E                | N    | 107.96 | 2209.2981 | 21     | 1.1  | 737.4408  | 3 | 33.05 | 43       | F43:1682 | OB5956 H1 Ro.raw  | 1.2362E8            | 20       | 20                      | 444   | 464 |                                       |                                                          | PEAKS DB  |
| R.I(+57.02)PSGFSYILNR.H                 | N    | 107.77 | 1435.7823 | 12     | -3.6 | 718.8959  | 2 | 36.92 | 43       | F43:1901 | OB5956 H1 Ro.raw  | 1.7559E7            | 7        | 7                       | 260   | 271 | Carbamidomethylation (DHKE, X@N-term) | I1:Carbamidomethylation (DHKE, X@N-term):1000.00         | PEAKS PTM |
| K.KGSEEDITNPINLR.D                      | N    | 107.76 | 1713.8533 | 15     | 2.8  | 857.9363  | 2 | 29.07 | 43       | F43:1439 | OB5956 H1 Ro.raw  | 8.6032E6            | 7        | 7                       | 379   | 393 |                                       |                                                          | PEAKS DB  |
| R.I(+57.02)FLAGDKDNVIDQIEK.Q            | N    | 105.70 | 1873.9785 | 16     | 1.7  | 937.9982  | 2 | 32.48 | 43       | F43:1653 | OB5956 H1 Ro.raw  | 1.1722E7            | 5        | 5                       | 536   | 551 | Carbamidomethylation (DHKE, X@N-term) | I1:Carbamidomethylation (DHKE, X@N-term):90.91           | PEAKS PTM |
| R.DQSSYLQGFSR.N                         | N    | 105.08 | 1286.5891 | 11     | 0.8  | 644.3024  | 2 | 30.81 | 40       | F40:1431 | OB5953 H3A Ro.raw | 9.5783E7            | 31       | 31                      | 302   | 312 |                                       |                                                          | PEAKS DB  |
| R.V(+57.02)LLEENAGGEQEER.G              | N    | 103.80 | 1628.7642 | 14     | 0.3  | 815.3896  | 2 | 27.08 | 43       | F43:1322 | OB5956 H1 Ro.raw  | 4.0193E5            | 3        | 3                       | 329   | 342 | Carbamidomethylation (DHKE, X@N-term) | V1:Carbamidomethylation (DHKE, X@N-term):49.37           | PEAKS PTM |
| K.NPQLQDLDMMLTCEIK(+14.02).E            | N    | 103.68 | 2003.9730 | 17     | -1.2 | 1002.9926 | 2 | 38.20 | 43       | F43:1989 | OB5956 H1 Ro.raw  | 5.9168E6            | 4        | 4                       | 415   | 431 | Methylation(KR)                       | K17:Methylation(KR):1000.00                              | PEAKS PTM |
| K.SFNLDEGHALR.I                         | N    | 103.18 | 1257.6101 | 11     | -1.7 | 629.8113  | 2 | 28.00 | 43       | F43:1362 | OB5956 H1 Ro.raw  | 1.1584E8            | 33       | 31                      | 249   | 259 |                                       |                                                          | PEAKS DB  |
| K.AM(+15.99)VIVVVKGTGNLELVAVR.K         | N    | 103.14 | 2097.1980 | 20     | 1.6  | 700.0744  | 3 | 33.04 | 43       | F43:1684 | OB5956 H1 Ro.raw  | 2.3148E7            | 9        | 9                       | 444   | 463 | Oxidation (M)                         | M2:Oxidation (M):1000.00                                 | PEAKS DB  |
| R.DGEPLSNNFGR.L                         | N    | 102.69 | 1319.5742 | 12     | 0.3  | 660.7946  | 2 | 29.24 | 43       | F43:1495 | OB5956 H1 Ro.raw  | 7.4875E6            | 3        | 3                       | 394   | 405 |                                       |                                                          | PEAKS DB  |
| K.DLAFIGSGEQVEK.L                       | N    | 100.93 | 1375.6619 | 13     | -1.9 | 688.8369  | 2 | 30.34 | 43       | F43:1508 | OB5956 H1 Ro.raw  | 9.196E7             | 8        | 8                       | 555   | 567 |                                       |                                                          | PEAKS DB  |
| total 244 peptides                      |      |        |           |        |      |           |   |       |          |          |                   |                     |          |                         |       |     |                                       |                                                          |           |

| Peptide                                           | Uniq | -10lgP | Mass      | Length | ppm  | m/z       | z | RT    | Fraction | Scan     | Source File      | Area Roasted in gel | #Feature | #Feature Roasted in gel | Start | End | PTM                                          | AScore                                                  | Found By  |
|---------------------------------------------------|------|--------|-----------|--------|------|-----------|---|-------|----------|----------|------------------|---------------------|----------|-------------------------|-------|-----|----------------------------------------------|---------------------------------------------------------|-----------|
| K.NPQLQLDLM(+15.99)MLTC(+57.02)VEIKEGALMLPHFNSK.A | N    | 100.40 | 3387.6335 | 29     | -0.6 | 1130.2178 | 3 | 37.70 | 41       | F41:1939 | OB5954 H1 Ro.raw | 8.7706E7            | 6        | 6                       | 415   | 443 | Oxidation (M); Carbamidomethylation          | M9:Oxidation (M):26.02;C13:Carbamidomethylation:1000.00 | PEAKS DB  |
| R.RVLLEENAGGEQEER.G                               | N    | 100.35 | 1727.8438 | 15     | 0.2  | 576.9553  | 3 | 25.30 | 42       | F42:1185 | OB5955 H1 Ro.raw | 8.2964E5            | 6        | 6                       | 328   | 342 |                                              |                                                         | PEAKS DB  |
| R.EGEQEWGTPGSEVR.E                                | Y    | 100.27 | 1559.6852 | 14     | 0.8  | 780.8505  | 2 | 27.93 | 42       | F42:1345 | OB5955 H1 Ro.raw | 3.381E6             | 3        | 3                       | 147   | 160 |                                              |                                                         | PEAKS DB  |
| K.NPQLQLDMLMLTC(+57.02)VEIKEGALMLPHFNSK.A         | N    | 98.85  | 3371.6387 | 29     | -2.7 | 843.9147  | 4 | 38.02 | 43       | F43:1969 | OB5956 H1 Ro.raw | 1.5351E8            | 12       | 12                      | 415   | 443 | Carbamidomethylation                         | C13:Carbamidomethylation:1000.00                        | PEAKS DB  |
| K.KNPQLQLDMLMLTC(+57.02)VEIKEGALMLPHFNSK.A        | N    | 97.96  | 3499.7336 | 30     | -3.9 | 875.9373  | 4 | 36.80 | 41       | F41:1884 | OB5954 H1 Ro.raw | 6.677E6             | 4        | 4                       | 414   | 443 | Carbamidomethylation                         | C14:Carbamidomethylation:1000.00                        | PEAKS DB  |
| R.VLLEEN(+.98)AGGEQEER.G                          | N    | 94.48  | 1572.7267 | 14     | 2.8  | 787.3728  | 2 | 27.46 | 43       | F43:1340 | OB5956 H1 Ro.raw | 6.2395E5            | 3        | 3                       | 329   | 342 | Deamidation (NQ)                             | N6:Deamidation (NQ):121.37                              | PEAKS DB  |
| R.IFLAGDKDNVIDQIEKQAK.D                           | N    | 94.35  | 2144.1477 | 19     | -2.1 | 715.7217  | 3 | 32.42 | 42       | F42:1625 | OB5955 H1 Ro.raw | 3.3984E6            | 9        | 9                       | 536   | 554 |                                              |                                                         | PEAKS DB  |
| R.KSFNLDEGHALRIPSGFISYILNR.H                      | N    | 93.78  | 2746.4553 | 24     | -0.7 | 687.6206  | 4 | 36.29 | 43       | F43:1876 | OB5956 H1 Ro.raw | 1.1783E6            | 4        | 4                       | 248   | 271 |                                              |                                                         | PEAKS DB  |
| R.REQEWEEDDEEEEGSNR.E                             | N    | 93.49  | 2436.9424 | 19     | 0.1  | 813.3215  | 3 | 26.72 | 43       | F43:1292 | OB5956 H1 Ro.raw | 8.6025E5            | 7        | 7                       | 472   | 490 |                                              |                                                         | PEAKS DB  |
| R.EGEQEWGTPGSEVRETSR.N                            | Y    | 93.19  | 2161.9512 | 19     | 3.0  | 1081.9861 | 2 | 27.83 | 43       | F43:1353 | OB5956 H1 Ro.raw | 3.9146E7            | 8        | 8                       | 147   | 165 |                                              |                                                         | PEAKS DB  |
| F.LAGDKDNVIDQIEK.Q                                | N    | 91.83  | 1556.8046 | 14     | -6.3 | 779.4047  | 2 | 32.21 | 43       | F43:1629 | OB5956 H1 Ro.raw | 5.4162E6            | 4        | 4                       | 538   | 551 |                                              |                                                         | PEAKS DB  |
| R.IPSGFISYILN(-17.03)R.H                          | N    | 91.80  | 1361.7343 | 12     | -4.9 | 681.8711  | 2 | 38.02 | 43       | F43:1980 | OB5956 H1 Ro.raw | 1.3387E6            | 3        | 3                       | 260   | 271 | Ammonia-loss (N)                             | N11:Ammonia-loss (N):1000.00                            | PEAKS PTM |
| K.AMVVVVNK.G                                      | N    | 91.04  | 971.5837  | 9      | -0.5 | 486.7989  | 2 | 30.16 | 43       | F43:1494 | OB5956 H1 Ro.raw | 7.1361E6            | 3        | 3                       | 444   | 452 |                                              |                                                         | PEAKS DB  |
| K.SFNLDEGH(+15.99)ALR.I                           | N    | 90.73  | 1273.6051 | 11     | 0.9  | 637.8104  | 2 | 30.16 | 43       | F43:1507 | OB5956 H1 Ro.raw | 8.7681E5            | 2        | 2                       | 249   | 259 | Oxidation (HW)                               | H8:Oxidation (HW):1000.00                               | PEAKS PTM |
| R.NNPFYFRR.F                                      | N    | 89.95  | 1296.6364 | 10     | -2.5 | 649.3239  | 2 | 28.89 | 43       | F43:1417 | OB5956 H1 Ro.raw | 1.3445E8            | 22       | 22                      | 166   | 175 |                                              |                                                         | PEAKS DB  |
| K.D(+57.02)LAFPGSGEQVEK.L                         | N    | 88.60  | 1432.6833 | 13     | -0.1 | 717.3489  | 2 | 31.08 | 41       | F41:1535 | OB5954 H1 Ro.raw | 9.7986E5            | 3        | 3                       | 555   | 567 | Carbamidomethylation (DHKE, X@N-term):131.10 | D1:Carbamidomethylation (DHKE, X@N-term):131.10         | PEAKS PTM |
| K.SFNLDEGH(+57.02)ALR.I                           | N    | 88.30  | 1314.6316 | 11     | -0.1 | 658.3230  | 2 | 28.22 | 41       | F41:1349 | OB5954 H1 Ro.raw | 2.9996E6            | 3        | 3                       | 249   | 259 | Carbamidomethylation (DHKE, X@N-term):30.36  | H8:Carbamidomethylation (DHKE, X@N-term):30.36          | PEAKS PTM |
| K.EGALMLPHFNSK.A                                  | N    | 88.21  | 1342.6703 | 12     | 2.5  | 672.3441  | 2 | 30.67 | 43       | F43:1529 | OB5956 H1 Ro.raw | 1.4087E7            | 5        | 5                       | 432   | 443 |                                              |                                                         | PEAKS DB  |
| K.NPQLQLDMM(-48.00)LTC(+57.02)VEIK.E              | N    | 88.05  | 1998.9755 | 17     | 1.9  | 1000.4969 | 2 | 32.85 | 43       | F43:1670 | OB5956 H1 Ro.raw | 5.9032E6            | 3        | 3                       | 415   | 431 | Carbamidomethylation                         | M10:Deamidomethyl:14.02;C13:Carbamid                    | PEAKS PTM |
| total 244 peptides                                |      |        |           |        |      |           |   |       |          |          |                  |                     |          |                         |       |     |                                              |                                                         |           |

| Peptide                                            | Uniq | -10lgP | Mass      | Length | ppm  | m/z       | z | RT    | Fraction | Scan     | Source File             | Area Roasted in gel | #Feature | #Feature Roasted in gel | Start | End | PTM                                                | AScore                                                                            | Found By     |
|----------------------------------------------------|------|--------|-----------|--------|------|-----------|---|-------|----------|----------|-------------------------|---------------------|----------|-------------------------|-------|-----|----------------------------------------------------|-----------------------------------------------------------------------------------|--------------|
|                                                    |      |        |           |        |      |           |   |       |          |          |                         |                     |          |                         |       |     |                                                    | omethylati<br>on:1000.0<br>0                                                      |              |
| K.GSEEDITNPINLR.D                                  | N    | 87.68  | 1585.7583 | 14     | 2.3  | 793.8882  | 2 | 31.16 | 42       | F42:1548 | OB5955<br>H1<br>Ro.raw  | 3.3709E6            | 3        | 3                       | 380   | 393 |                                                    |                                                                                   | PEAKS<br>DB  |
| R.GRREQEWEEEEEEEEEGSNR.E                           | N    | 87.21  | 2650.0649 | 21     | 1.1  | 884.3632  | 3 | 26.73 | 41       | F41:1280 | OB5954<br>H1<br>Ro.raw  | 7.9956E5            | 6        | 6                       | 470   | 490 |                                                    |                                                                                   | PEAKS<br>DB  |
| R.NNPFYFPSR.R                                      | N    | 86.35  | 1140.5352 | 9      | -0.1 | 571.2748  | 2 | 31.76 | 43       | F43:1593 | OB5956<br>H1<br>Ro.raw  | 1.7218E7            | 11       | 11                      | 166   | 174 |                                                    |                                                                                   | PEAKS<br>DB  |
| K.S(+57.02)FNLDEGHALR.I                            | N    | 86.31  | 1314.6316 | 11     | -0.5 | 658.3228  | 2 | 28.11 | 42       | F42:1359 | OB5955<br>H1<br>Ro.raw  | 2.6997E6            | 4        | 4                       | 249   | 259 | Carbamidomethylation<br>(DHKE, X@N-term):9<br>1.04 | S1:Carb<br>amidometh<br>ylation (D<br>HKE, X@N<br>-term):9<br>1.04                | PEAKS<br>PTM |
| I.PSGFISYILNR.H                                    | N    | 85.97  | 1265.6768 | 11     | -4.6 | 633.8427  | 2 | 36.75 | 43       | F43:1894 | OB5956<br>H1<br>Ro.raw  | 3.5986E5            | 2        | 2                       | 261   | 271 |                                                    |                                                                                   | PEAKS<br>DB  |
| R.IPSGFISYILNRHDQNLR.V                             | N    | 84.75  | 2256.1763 | 19     | 6.5  | 753.0709  | 3 | 33.61 | 43       | F43:1714 | OB5956<br>H1<br>Ro.raw  | 6.1581E7            | 21       | 21                      | 260   | 278 |                                                    |                                                                                   | PEAKS<br>DB  |
| R.I(+27.99)FLAGDKDNVIDQIEK.Q                       | N    | 84.60  | 1844.9519 | 16     | -2.1 | 923.4813  | 2 | 36.23 | 41       | F41:1853 | OB5954<br>H1<br>Ro.raw  | 1.9485E6            | 3        | 3                       | 536   | 551 | Formylation                                        | I1:Formyl<br>ation:98.7<br>5                                                      | PEAKS<br>PTM |
| K.SFNLDEGH(+15.99)ALRIPSGFISYILNR.H                | N    | 83.49  | 2634.3555 | 23     | -4.0 | 879.1223  | 3 | 38.76 | 43       | F43:2023 | OB5956<br>H1<br>Ro.raw  | 8.8519E5            | 1        | 1                       | 249   | 271 | Oxidation (HW)                                     | H8:Oxidat<br>ion (HW):<br>1000.00                                                 | PEAKS<br>PTM |
| K.KNPQLQDLDMMLTC(+57.02)VEIKEGALM(+15.99)LPHFNSK.A | N    | 83.11  | 3515.7285 | 30     | -1.9 | 879.9377  | 4 | 36.03 | 43       | F43:1857 | OB5956<br>H1<br>Ro.raw  | 6.6263E6            | 3        | 3                       | 414   | 443 | Carbamidomethylation;<br>Oxidation (M)             | C14:Carb<br>amidomet<br>hylation:1<br>000.00;M<br>23:Oxidati<br>on (M):11<br>4.34 | PEAKS<br>DB  |
| R.NTLEAAFAEFNEIRR.V                                | N    | 82.99  | 1893.9332 | 16     | -2.6 | 947.9714  | 2 | 34.11 | 42       | F42:1711 | OB5955<br>H1<br>Ro.raw  | 3.0959E8            | 36       | 35                      | 313   | 328 |                                                    |                                                                                   | PEAKS<br>DB  |
| K.A(+57.02)MVIVVVNKG TGNLELVAVR.K                  | N    | 82.14  | 2138.2246 | 20     | -5.4 | 1070.1138 | 2 | 34.47 | 42       | F42:1739 | OB5955<br>H1<br>Ro.raw  | 4.4412E6            | 3        | 3                       | 444   | 463 | Carbamidomethylation<br>(DHKE, X@N-term)           | A1:Carba<br>midometh<br>ylation (D<br>HKE, X@N<br>-term):20<br>7.56               | PEAKS<br>PTM |
| K.DLAFIGSGEQVEKLIK.N                               | N    | 80.89  | 1729.9249 | 16     | -1.6 | 865.9706  | 2 | 33.95 | 30       | F30:1478 | OB5926<br>H3B<br>Ro.raw | 3.9305E5            | 5        | 4                       | 555   | 570 |                                                    |                                                                                   | PEAKS<br>DB  |
| I.FLAGDKDNVIDQIEK.Q                                | N    | 80.64  | 1703.8729 | 15     | -5.7 | 852.9388  | 2 | 32.22 | 43       | F43:1635 | OB5956<br>H1<br>Ro.raw  | 3.1343E5            | 3        | 3                       | 537   | 551 |                                                    |                                                                                   | PEAKS<br>DB  |
| K.EGALM(+15.99)LPHFNSK.A                           | N    | 80.48  | 1358.6653 | 12     | 1.1  | 680.3406  | 2 | 29.85 | 43       | F43:1485 | OB5956<br>H1<br>Ro.raw  | 3.0314E6            | 5        | 5                       | 432   | 443 | Oxidation (M)                                      | M5:Oxidat<br>ion (M):1<br>000.00                                                  | PEAKS<br>DB  |
| K.GTGNLELVAVR.K                                    | N    | 80.39  | 1127.6299 | 11     | -1.3 | 564.8215  | 2 | 30.21 | 41       | F41:1476 | OB5954<br>H1<br>Ro.raw  | 2.4706E7            | 5        | 5                       | 453   | 463 |                                                    |                                                                                   | PEAKS<br>DB  |
| R.NTLEAAFN(+.98)AEFNEIRR.V                         | N    | 79.02  | 1894.9172 | 16     | -2.2 | 948.4638  | 2 | 32.35 | 41       | F41:1616 | OB5954<br>H1<br>Ro.raw  | 1.3357E6            | 5        | 5                       | 313   | 328 | Deamidation (NQ)                                   | N8:Deami<br>dation (N<br>Q):48.12                                                 | PEAKS<br>DB  |
| R.VLLEENAGGEQEER(+14.02).G                         | N    | 78.92  | 1585.7583 | 14     | 0.7  | 793.8870  | 2 | 27.86 | 41       | F41:1339 | OB5954<br>H1<br>Ro.raw  | 1.6341E5            | 3        | 3                       | 329   | 342 | Methylation(KR)                                    | R14:Meth<br>ylation(K<br>R):1000.0<br>0                                           | PEAKS<br>PTM |
| K.GTGNLELVAVRK.E                                   | N    | 78.87  | 1255.7249 | 12     | 0.7  | 628.8701  | 2 | 27.30 | 41       | F41:1322 | OB5954<br>H1<br>Ro.raw  | 2.29E7              | 10       | 10                      | 453   | 464 |                                                    |                                                                                   | PEAKS<br>DB  |
| K.QFQNLQNHR.I                                      | N    | 78.35  | 1183.5846 | 9      | 0.0  | 592.7996  | 2 | 23.81 | 42       | F42:1102 | OB5955<br>H1<br>Ro.raw  | 1.5125E5            | 6        | 6                       | 199   | 207 |                                                    |                                                                                   | PEAKS<br>DB  |
| total 244 peptides                                 |      |        |           |        |      |           |   |       |          |          |                         |                     |          |                         |       |     |                                                    |                                                                                   |              |

| Peptide                                                    | Uniq | -10lgP | Mass      | Length | ppm  | m/z       | z | RT    | Fraction | Scan     | Source File      | Area Roasted in gel | #Feature | #Feature Roasted in gel | Start | End | PTM                                 | AScore                                                                           | Found By  |
|------------------------------------------------------------|------|--------|-----------|--------|------|-----------|---|-------|----------|----------|------------------|---------------------|----------|-------------------------|-------|-----|-------------------------------------|----------------------------------------------------------------------------------|-----------|
| K.NPQLQDLDMM(+15.99)LTC(+57.02)VEIKEGALMLPHFNSK.A          | N    | 78.01  | 3387.6335 | 29     | -0.8 | 1130.2175 | 3 | 36.42 | 41       | F41:1862 | OB5954 H1 Ro.raw | 6.8935E7            | 6        | 6                       | 415   | 443 | Oxidation (M); Carbamidomethylation | M10:Oxidation (M):24.44;C13:Carbamidomethylation:1000.00                         | PEAKS DB  |
| R.LFEVKPKDKNPQLQDLDMMLTC(+57.02)VEIK.E                     | N    | 77.87  | 3131.6069 | 26     | -4.0 | 1044.8721 | 3 | 34.65 | 42       | F42:1756 | OB5955 H1 Ro.raw | 5.0788E6            | 4        | 4                       | 406   | 431 | Carbamidomethylation                | C22:Carbamidomethylation:1000.00                                                 | PEAKS DB  |
| K.NPQLQDLDM(+15.99)MLTC(+57.02)VEIKEGALM(+15.99)LPHFNSK.A  | N    | 77.10  | 3403.6284 | 29     | 1.1  | 851.9153  | 4 | 37.51 | 41       | F41:1883 | OB5954 H1 Ro.raw | 7.3887E6            | 7        | 7                       | 415   | 443 | Oxidation (M); Carbamidomethylation | M9:Oxidation (M):27.96;C13:Carbamidomethylation:1000.00;M22:Oxidation (M):71.31  | PEAKS DB  |
| R.IFLAGDKDNVIDQIEKQ(+.98)AK.D                              | N    | 76.22  | 2145.1316 | 19     | 1.5  | 716.0522  | 3 | 33.08 | 42       | F42:1661 | OB5955 H1 Ro.raw | 0                   | 0        | 0                       | 536   | 554 | Deamidation (NQ)                    | Q17:Deamidation (NQ):48.83                                                       | PEAKS DB  |
| R.EETSRN(+.98)NPYFPSRR.F                                   | N    | 75.62  | 1899.8864 | 15     | -0.2 | 634.3026  | 3 | 28.39 | 41       | F41:1381 | OB5954 H1 Ro.raw | 3.2976E5            | 2        | 2                       | 161   | 175 | Deamidation (NQ)                    | N6:Deamidation (NQ):33.98                                                        | PEAKS DB  |
| L.AGDKDNVIDQIEK.Q                                          | N    | 75.39  | 1443.7205 | 13     | -3.7 | 722.8649  | 2 | 32.08 | 42       | F42:1607 | OB5955 H1 Ro.raw | 3.3426E5            | 1        | 1                       | 539   | 551 |                                     |                                                                                  | PEAKS DB  |
| K.Q(-17.03)FQNLQNHR.I                                      | N    | 75.35  | 1166.5581 | 9      | -1.2 | 584.2856  | 2 | 28.00 | 43       | F43:1365 | OB5956 H1 Ro.raw | 4.927E6             | 4        | 4                       | 199   | 207 | Pyro-glu from Q                     | Q1:Pyro-glu from Q:1000.00                                                       | PEAKS PTM |
| R.SSDNEGVIVK.V                                             | N    | 75.32  | 1046.5244 | 10     | -1.0 | 524.2690  | 2 | 23.58 | 41       | F41:1103 | OB5954 H1 Ro.raw | 3.7568E5            | 3        | 3                       | 351   | 360 |                                     |                                                                                  | PEAKS DB  |
| R.VAKISMPVNTPGQFEDFFPASSR.D                                | N    | 74.27  | 2524.2419 | 23     | -2.9 | 842.4188  | 3 | 34.29 | 42       | F42:1735 | OB5955 H1 Ro.raw | 1.4483E6            | 3        | 3                       | 279   | 301 |                                     |                                                                                  | PEAKS DB  |
| K.NPQLQDLDM(+15.99)M(+15.99)LTC(+57.02)VEIKEGALMLPHFNSK.A  | N    | 73.00  | 3403.6284 | 29     | -3.9 | 1135.5457 | 3 | 35.83 | 43       | F43:1849 | OB5956 H1 Ro.raw | 7.8068E6            | 5        | 5                       | 415   | 443 | Oxidation (M); Carbamidomethylation | M9:Oxidation (M):54.18;M10:Oxidation (M):63.99;C13:Carbamidomethylation:1000.00  | PEAKS DB  |
| K.KNPQLQDLDM(+15.99)MLTC(+57.02)VEIKEGALM(+15.99)LPHFNSK.A | N    | 72.71  | 3531.7234 | 30     | -1.9 | 883.9364  | 4 | 35.86 | 41       | F41:1821 | OB5954 H1 Ro.raw | 7.53E5              | 1        | 1                       | 414   | 443 | Carbamidomethylation; Oxidation (M) | M10:Oxidation (M):17.01;C14:Carbamidomethylation:1000.00;M23:Oxidation (M):85.25 | PEAKS DB  |
| R.VLLEENAGGEQEERQGR.R                                      | N    | 72.44  | 1912.9238 | 17     | 0.6  | 957.4698  | 2 | 25.30 | 42       | F42:1191 | OB5955 H1 Ro.raw | 3.1353E6            | 8        | 8                       | 329   | 345 |                                     |                                                                                  | PEAKS DB  |
| K.QAKDLAFPGSGEQVEK.L                                       | N    | 72.39  | 1702.8525 | 16     | 1.2  | 568.6255  | 3 | 27.08 | 43       | F43:1321 | OB5956 H1 Ro.raw | 2.8232E5            | 6        | 6                       | 552   | 567 |                                     |                                                                                  | PEAKS DB  |
| K.EGALMLPHFN(+.98)SK.A                                     | N    | 71.37  | 1343.6543 | 12     | 2.6  | 672.8362  | 2 | 31.66 | 43       | F43:1595 | OB5956 H1 Ro.raw | 1.0101E5            | 2        | 2                       | 432   | 443 | Deamidation (NQ)                    | N10:Deamidation (NQ):1000.00                                                     | PEAKS DB  |
| R.EQEW(+15.99)EEEEEEEEEGSNR.E                              | N    | 70.36  | 2296.8362 | 18     | 3.2  | 1149.4291 | 2 | 27.67 | 41       | F41:1333 | OB5954 H1 Ro.raw | 1.024E6             | 3        | 3                       | 473   | 490 | Oxidation (HW)                      | W4:Oxidation (HW):1000.00                                                        | PEAKS PTM |
| total 244 peptides                                         |      |        |           |        |      |           |   |       |          |          |                  |                     |          |                         |       |     |                                     |                                                                                  |           |

| Peptide                                        | Uniq | -10lgP | Mass      | Length | ppm  | m/z       | z | RT    | Fraction | Scan     | Source File       | Area Roasted in gel | #Feature | #Feature Roasted in gel | Start | End | PTM                                         | AScore                                                     | Found By  |
|------------------------------------------------|------|--------|-----------|--------|------|-----------|---|-------|----------|----------|-------------------|---------------------|----------|-------------------------|-------|-----|---------------------------------------------|------------------------------------------------------------|-----------|
| F.NLDEGHALR.I                                  | N    | 70.14  | 1023.5097 | 9      | -2.5 | 512.7609  | 2 | 28.00 | 43       | F43:1370 | OB5956 H1 Ro.raw  | 2.6181E6            | 3        | 3                       | 251   | 259 |                                             |                                                            | PEAKS DB  |
| R.N(+.98)TLEAAFNAEFNEIRR.V                     | N    | 69.73  | 1894.9172 | 16     | 0.4  | 948.4662  | 2 | 32.39 | 42       | F42:1620 | OB5955 H1 Ro.raw  | 2.6319E6            | 3        | 3                       | 313   | 328 | Deamidation (NQ)                            | N1:Deamidation (NQ):41.52                                  | PEAKS DB  |
| E.PDLNNFGR.L                                   | N    | 69.35  | 1018.4832 | 9      | 0.9  | 510.2493  | 2 | 31.57 | 43       | F43:1584 | OB5956 H1 Ro.raw  | 1.3026E6            | 4        | 4                       | 397   | 405 |                                             |                                                            | PEAKS DB  |
| R.K(+57.02)SFNLDEGHALR.I                       | N    | 69.20  | 1442.7266 | 12     | -0.1 | 722.3705  | 2 | 26.25 | 42       | F42:1250 | OB5955 H1 Ro.raw  | 4.0798E5            | 6        | 6                       | 248   | 259 | Carbamidomethylation (DHKE, X@N-term):76.17 | K1:Carbamidomethylation (DHKE, X@N-term):76.17             | PEAKS PTM |
| R.LFEVKPKKPNQLQDLDDMM(+15.99)LTC(+57.02)VEIK.E | N    | 69.17  | 3147.6018 | 26     | 2.2  | 787.9095  | 4 | 33.24 | 42       | F42:1670 | OB5955 H1 Ro.raw  | 2.0797E6            | 2        | 2                       | 406   | 431 | Oxidation (M); Carbamidomethylation         | M19:Oxidation (M):40.00;C22:Carbamidomethylation:1000.00   | PEAKS DB  |
| K.SFNLDE(+57.02)GHALRIPSGFISYILNR.H            | N    | 69.07  | 2675.3818 | 23     | -1.9 | 892.7996  | 3 | 37.80 | 43       | F43:1964 | OB5956 H1 Ro.raw  | 0                   | 0        | 0                       | 249   | 271 |                                             | E6:Carbamidomethylation (DHKE, X@N-term):0.00              | PEAKS PTM |
| R.IFLAGDKDNVID(+57.02)QIEK.Q                   | N    | 69.05  | 1873.9785 | 16     | -1.3 | 937.9953  | 2 | 32.42 | 42       | F42:1608 | OB5955 H1 Ro.raw  | 8.0339E6            | 1        | 1                       | 536   | 551 |                                             | D12:Carbamidomethylation (DHKE, X@N-term):15.85            | PEAKS PTM |
| R.IVQIEARPNTLVLPK.H                            | Y    | 68.17  | 1690.0140 | 15     | -1.0 | 846.0134  | 2 | 30.56 | 41       | F41:1509 | OB5954 H1 Ro.raw  | 4.6727E7            | 21       | 21                      | 208   | 222 |                                             |                                                            | PEAKS DB  |
| A.GDKDNVIDQIEK.Q                               | N    | 68.14  | 1372.6833 | 12     | -7.0 | 687.3441  | 2 | 32.22 | 43       | F43:1632 | OB5956 H1 Ro.raw  | 1.1241E6            | 3        | 3                       | 540   | 551 |                                             |                                                            | PEAKS DB  |
| G.SEEEDITNPINLRDGPDLNNFGR.L                    | N    | 68.10  | 2830.3005 | 25     | -1.6 | 944.4417  | 3 | 33.02 | 30       | F30:1421 | OB5926 H3B Ro.raw | 1.3758E5            | 3        | 3                       | 381   | 405 |                                             |                                                            | PEAKS DB  |
| R.RVLLEEN(+.98)AGGEQEER.G                      | N    | 67.83  | 1728.8278 | 15     | -0.8 | 577.2827  | 3 | 25.96 | 42       | F42:1233 | OB5955 H1 Ro.raw  | 1.359E4             | 2        | 2                       | 328   | 342 | Deamidation (NQ)                            | N7:Deamidation (NQ):77.53                                  | PEAKS DB  |
| R.DQS(-18.01)SYLQGFSR.N                        | N    | 67.70  | 1268.5785 | 11     | 0.2  | 635.2966  | 2 | 30.91 | 41       | F41:1537 | OB5954 H1 Ro.raw  | 6.4401E5            | 3        | 3                       | 302   | 312 | Dehydration                                 | S3:Dehydration:40.00                                       | PEAKS PTM |
| R.RVLLEENAGGEQEERGQR.R                         | N    | 67.67  | 2069.0249 | 18     | 1.9  | 690.6835  | 3 | 25.60 | 41       | F41:1205 | OB5954 H1 Ro.raw  | 1.8247E6            | 3        | 3                       | 328   | 345 |                                             |                                                            | PEAKS DB  |
| K.Q(-17.03)AKDLAFPGSGEQVEK.L                   | N    | 67.52  | 1685.8260 | 16     | 0.1  | 843.9204  | 2 | 29.98 | 43       | F43:1503 | OB5956 H1 Ro.raw  | 9.9003E4            | 3        | 3                       | 552   | 567 | Pyro-glu from Q                             | Q1:Pyro-glu from Q:1000.00                                 | PEAKS PTM |
| K.NPQLQ(+.98)DLDMMLTLC(+57.02)VEIK.E           | N    | 67.25  | 2047.9629 | 17     | 1.5  | 1024.9902 | 2 | 44.46 | 43       | F43:2348 | OB5956 H1 Ro.raw  | 0                   | 0        | 0                       | 415   | 431 | Carbamidomethylation                        | Q5:Deamidation (NQ):19.68;C13:Carbamidomethylation:1000.00 | PEAKS DB  |
| K.SFNLDE(-18.01)EGHALR.I                       | N    | 66.88  | 1239.5996 | 11     | 2.9  | 620.8089  | 2 | 28.79 | 41       | F41:1400 | OB5954 H1 Ro.raw  | 0                   | 0        | 0                       | 249   | 259 | Dehydration                                 | D5:Dehydration:49.79                                       | PEAKS PTM |
| K.AM(+15.99)VIVVVNK.G                          | N    | 66.42  | 987.5787  | 9      | 1.1  | 494.7972  | 2 | 27.11 | 41       | F41:1283 | OB5954 H1 Ro.raw  | 1.8879E6            | 3        | 3                       | 444   | 452 | Oxidation (M)                               | M2:Oxidation (M):1000.00                                   | PEAKS DB  |
| K.KNPQLQDLDMMLTCVEIK(+14.02).E                 | N    | 66.06  | 2132.0679 | 18     | -0.6 | 1067.0405 | 2 | 36.31 | 41       | F41:1858 | OB5954 H1 Ro.raw  | 5.2356E5            | 2        | 2                       | 414   | 431 | Methylation(KR)                             | K18:Methylation(KR):130.57                                 | PEAKS PTM |
| total 244 peptides                             |      |        |           |        |      |           |   |       |          |          |                   |                     |          |                         |       |     |                                             |                                                            |           |

| Peptide                                                  | Uniq | -10lgP | Mass      | Length | ppm  | m/z       | z | RT    | Fraction | Scan     | Source File      | Area Roasted in gel | #Feature | #Feature Roasted in gel | Start | End | PTM                                   | AScore                                                               | Found By  |
|----------------------------------------------------------|------|--------|-----------|--------|------|-----------|---|-------|----------|----------|------------------|---------------------|----------|-------------------------|-------|-----|---------------------------------------|----------------------------------------------------------------------|-----------|
| R.EETSRNNPFYFPSRR.F                                      | N    | 65.61  | 1898.9023 | 15     | 1.8  | 633.9759  | 3 | 27.75 | 42       | F42:1339 | OB5955 H1 Ro.raw | 8.693E5             | 4        | 4                       | 161   | 175 |                                       |                                                                      | PEAKS DB  |
| K.NPQLQDLDMMLTC(+57.02)VEIKEGALM(+15.99)LPHFNSK.A        | N    | 64.76  | 3387.6335 | 29     | -0.6 | 847.9152  | 4 | 37.63 | 43       | F43:1915 | OB5956 H1 Ro.raw | 8.7706E7            | 6        | 6                       | 415   | 443 | Carbamidomethylation; Oxidation (M)   | C13:Carb amidomet hylation:1 000.00;M 22:Oxidati on (M):8 2.05       | PEAKS DB  |
| R.IPSGFISY(+125.90)ILNR.H                                | N    | 64.64  | 1504.6575 | 12     | -1.9 | 753.3346  | 2 | 38.39 | 43       | F43:2001 | OB5956 H1 Ro.raw | 2.0334E5            | 2        | 2                       | 260   | 271 | Iodination                            | Y8:Iodinat ion:1000. 00                                              | PEAKS PTM |
| R.IPSGFISYILN(+.98)RHDNQNL.R.V                           | N    | 64.64  | 2257.1604 | 19     | 4.7  | 753.3976  | 3 | 34.29 | 42       | F42:1740 | OB5955 H1 Ro.raw | 6.9901E5            | 2        | 2                       | 260   | 278 | Deamidation (NQ)                      | N11:Dea midation (NQ):36.2 4                                         | PEAKS DB  |
| R.WGPAEPR.E                                              | Y    | 64.52  | 811.3976  | 7      | 1.8  | 406.7068  | 2 | 25.60 | 41       | F41:1224 | OB5954 H1 Ro.raw | 1.6282E6            | 3        | 3                       | 109   | 115 |                                       |                                                                      | PEAKS DB  |
| R.IVQIEARPN.T                                            | Y    | 64.48  | 1038.5822 | 9      | -0.5 | 520.2981  | 2 | 25.87 | 42       | F42:1229 | OB5955 H1 Ro.raw | 4.4669E4            | 3        | 3                       | 208   | 216 |                                       |                                                                      | PEAKS DB  |
| A.FPGSGEQVEK.L                                           | N    | 64.10  | 1076.5138 | 10     | -3.4 | 539.2623  | 2 | 30.29 | 42       | F42:1495 | OB5955 H1 Ro.raw | 4.0412E5            | 3        | 3                       | 558   | 567 |                                       |                                                                      | PEAKS DB  |
| K.ISMPVNTPGQFEDFFPASSRDQSSYLQGFSR.N                      | N    | 63.85  | 3494.6201 | 31     | -0.9 | 1165.8796 | 3 | 36.01 | 43       | F43:1851 | OB5956 H1 Ro.raw | 5.8723E6            | 6        | 6                       | 282   | 312 |                                       |                                                                      | PEAKS DB  |
| R.LFEVKPDKK.N                                            | N    | 63.79  | 1102.6385 | 9      | 0.6  | 552.3269  | 2 | 24.50 | 43       | F43:1159 | OB5956 H1 Ro.raw | 1.1348E6            | 6        | 6                       | 406   | 414 |                                       |                                                                      | PEAKS DB  |
| Q.SSYLQGFSR.N                                            | N    | 63.16  | 1043.5035 | 9      | 1.4  | 522.7598  | 2 | 29.29 | 41       | F41:1438 | OB5954 H1 Ro.raw | 6.2708E4            | 3        | 3                       | 304   | 312 |                                       |                                                                      | PEAKS DB  |
| K.QFQNLQN(+.98)HR.I                                      | N    | 63.09  | 1184.5686 | 9      | 5.4  | 593.2948  | 2 | 23.60 | 43       | F43:1114 | OB5956 H1 Ro.raw | 8.0412E2            | 1        | 1                       | 199   | 207 |                                       | N7:Deami dation (N Q):0.00                                           | PEAKS DB  |
| K.EGALMLPH(+14.02)FNSK.A                                 | N    | 63.06  | 1356.6860 | 12     | -4.2 | 679.3475  | 2 | 30.85 | 43       | F43:1554 | OB5956 H1 Ro.raw | 2.9707E5            | 3        | 3                       | 432   | 443 | Methylation(others)                   | H8:Methyl ation(oth ers):65.81                                       | PEAKS PTM |
| P.SGFISYILNR.H                                           | N    | 63.04  | 1168.6240 | 10     | 1.5  | 585.3202  | 2 | 35.08 | 43       | F43:1803 | OB5956 H1 Ro.raw | 2.9962E5            | 1        | 1                       | 262   | 271 |                                       |                                                                      | PEAKS DB  |
| N.LDEGHALR.I                                             | N    | 62.84  | 909.4668  | 8      | 0.0  | 455.7407  | 2 | 27.93 | 42       | F42:1350 | OB5955 H1 Ro.raw | 1.8672E5            | 3        | 3                       | 252   | 259 |                                       |                                                                      | PEAKS DB  |
| K.A(+57.02)MVIVVVNKG TGNLELVAVRK.E                       | N    | 62.52  | 2266.3196 | 21     | 0.7  | 1134.1678 | 2 | 32.98 | 42       | F42:1660 | OB5955 H1 Ro.raw | 1.5099E7            | 6        | 6                       | 444   | 464 | Carbamidomethylation (DHKE, X@N-term) | A1:Carba midometh ylation (D HKE, X@N -term):13 9.69                 | PEAKS PTM |
| K.HADADNILVIQQGQATVTVANGN(+.98)NRK.S                     | N    | 62.31  | 2747.3950 | 26     | -0.1 | 916.8055  | 3 | 30.70 | 41       | F41:1517 | OB5954 H1 Ro.raw | 8.5956E3            | 1        | 1                       | 223   | 248 |                                       | N23:Dea midation (NQ):9.40                                           | PEAKS DB  |
| K.SFN(+15.99)LDEGHALR.I                                  | N    | 62.00  | 1273.6051 | 11     | 0.0  | 637.8098  | 2 | 27.46 | 43       | F43:1330 | OB5956 H1 Ro.raw | 9.622E5             | 3        | 3                       | 249   | 259 | Oxidation or Hydroxylation            | N3:Oxidat ion or Hyd roxylatio n:55.92                               | PEAKS PTM |
| R.IP(+15.99)SGFISYILNR.H                                 | N    | 61.98  | 1394.7557 | 12     | -0.8 | 698.3846  | 2 | 37.47 | 43       | F43:1932 | OB5956 H1 Ro.raw | 3.2208E6            | 4        | 4                       | 260   | 271 | Oxidation or Hydroxylation            | P2:Oxidati on or Hyd roxylatio n:39.25                               | PEAKS PTM |
| K.NPQLQDLDM(+15.99)LTC(+57.02)VEIKEGALM(+15.99)LPHFNSK.A | N    | 61.19  | 3403.6284 | 29     | 0.3  | 851.9147  | 4 | 35.86 | 41       | F41:1801 | OB5954 H1 Ro.raw | 3.4294E6            | 4        | 4                       | 415   | 443 | Oxidation (M); Carbamidomethylation   | M10:Oxid ation (M): 21.94;C1 3:Carbami domethyla tion:1000. 00;M22:O | PEAKS DB  |
| total 244 peptides                                       |      |        |           |        |      |           |   |       |          |          |                  |                     |          |                         |       |     |                                       |                                                                      |           |

| Peptide                                                           | Uniq | -10lgP | Mass      | Length | ppm  | m/z       | z | RT    | Fraction | Scan     | Source File       | Area Roasted in gel | #Feature | #Feature Roasted in gel | Start | End | PTM                                   | AScore                                                                                                        | Found By  |
|-------------------------------------------------------------------|------|--------|-----------|--------|------|-----------|---|-------|----------|----------|-------------------|---------------------|----------|-------------------------|-------|-----|---------------------------------------|---------------------------------------------------------------------------------------------------------------|-----------|
|                                                                   |      |        |           |        |      |           |   |       |          |          |                   |                     |          |                         |       |     |                                       | xidation (M):61.50                                                                                            |           |
| K.G(+57.02)TGNLELVAVRK.E                                          | N    | 60.73  | 1312.7462 | 12     | -0.4 | 657.3801  | 2 | 27.30 | 41       | F41:1303 | OB5954 H1 Ro.raw  | 3.6978E5            | 2        | 2                       | 453   | 464 | Carbamidomethylation (DHKE, X@N-term) | G1:Carbamidomethylation (DHKE, X@N-term):55.46                                                                | PEAKS PTM |
| R.EQEWEEEEEEEEGSNREVR.R                                           | N    | 60.58  | 2821.1545 | 22     | 1.9  | 941.3939  | 3 | 26.71 | 43       | F43:1297 | OB5956 H1 Ro.raw  | 1.0274E6            | 4        | 4                       | 473   | 494 |                                       |                                                                                                               | PEAKS DB  |
| K.NPQLQLDLM(+15.99)M(+15.99)LTC(+57.02)VEIKEGALM(+15.99)LPHFNSK.A | N    | 60.17  | 3419.6233 | 29     | -0.9 | 855.9124  | 4 | 34.83 | 42       | F42:1766 | OB5955 H1 Ro.raw  | 1.2322E6            | 3        | 3                       | 415   | 443 | Oxidation (M); Carbamidomethylation   | M9:Oxidation (M):1000.00;M10:Oxidation (M):1000.00;C13:Carbamidomethylation:1000.00;M22:Oxidation (M):1000.00 | PEAKS DB  |
| R.IPSGFISY(+15.99)ILNR.H                                          | N    | 60.13  | 1394.7557 | 12     | -0.7 | 698.3846  | 2 | 35.11 | 41       | F41:1859 | OB5954 H1 Ro.raw  | 3.4529E6            | 5        | 5                       | 260   | 271 | Oxidation or Hydroxylation            | Y8:Oxidation or Hydroxylation:67.76                                                                           | PEAKS PTM |
| L.DEGHALR.I                                                       | N    | 59.61  | 796.3828  | 7      | 2.5  | 399.1996  | 2 | 27.93 | 42       | F42:1351 | OB5955 H1 Ro.raw  | 9.3538E4            | 3        | 3                       | 253   | 259 |                                       |                                                                                                               | PEAKS DB  |
| R.LFEVKPKKPNPQLQ(+.98)DLDM(+15.99)LTC(+57.02)VEIK.E               | N    | 59.38  | 3148.5857 | 26     | 7.4  | 788.1595  | 4 | 33.17 | 42       | F42:1670 | OB5955 H1 Ro.raw  | 3.9804E5            | 1        | 1                       | 406   | 431 | Oxidation (M); Carbamidomethylation   | Q14:Deamidation (NQ):0.00;M19:Oxidation (M):23.10;C22:Carbamidomethylation:1000.00                            | PEAKS DB  |
| R.VLLEEN(-17.03)AGGEQEER.G                                        | N    | 59.22  | 1554.7162 | 14     | 1.2  | 778.3663  | 2 | 27.73 | 42       | F42:1335 | OB5955 H1 Ro.raw  | 0                   | 0        | 0                       | 329   | 342 | Ammonia-loss (N)                      | N6:Ammonia-loss (N):1000.00                                                                                   | PEAKS PTM |
| K.SFNLDEGHALRIPSGFISYILNRHDNQNL.R                                 | N    | 59.07  | 3495.7759 | 30     | 1.5  | 700.1635  | 5 | 39.97 | 40       | F40:1987 | OB5953 H3A Ro.raw | 2.0405E7            | 15       | 15                      | 249   | 278 |                                       |                                                                                                               | PEAKS DB  |
| K.SFNLDEGHALR(+31.99)IPSGFISYILNR.H                               | N    | 58.88  | 2650.3503 | 23     | 0.1  | 884.4575  | 3 | 39.14 | 42       | F42:2021 | OB5955 H1 Ro.raw  | 5.6519E5            | 1        | 1                       | 249   | 271 | Dihydroxy                             | R11:Dihydroxy:46.57                                                                                           | PEAKS PTM |
| R.LFEVKPKK.K                                                      | N    | 58.71  | 974.5436  | 8      | 1.7  | 488.2799  | 2 | 25.30 | 42       | F42:1183 | OB5955 H1 Ro.raw  | 1.7315E6            | 6        | 6                       | 406   | 413 |                                       |                                                                                                               | PEAKS DB  |
| K.GSEEDITNPIN(+.98)LRDGEPLSNNGFR.L                                | N    | 58.69  | 2888.3059 | 26     | 6.7  | 1445.1699 | 2 | 32.90 | 41       | F41:1642 | OB5954 H1 Ro.raw  | 1.7853E5            | 1        | 1                       | 380   | 405 |                                       | N12:Deamidation (NQ):12.33                                                                                    | PEAKS DB  |
| K.SFNLDE(+57.02)GHALR.I                                           | N    | 58.62  | 1314.6316 | 11     | 0.3  | 658.3232  | 2 | 27.83 | 43       | F43:1458 | OB5956 H1 Ro.raw  | 2.3371E6            | 2        | 2                       | 249   | 259 | Carbamidomethylation (DHKE, X@N-term) | E6:Carbamidomethylation (DHKE, X@N-term):27.25                                                                | PEAKS PTM |
| R.N(+57.02)NPFFPSRR.F                                             | N    | 58.56  | 1353.6577 | 10     | 1.1  | 677.8369  | 2 | 29.74 | 42       | F42:1453 | OB5955 H1 Ro.raw  | 9.24E5              | 3        | 3                       | 166   | 175 | Carbamidomethylation (DHKE, X@N-term) | N1:Carbamidomethylation (DHKE, X@N-term):1000.00                                                              | PEAKS PTM |
| R.IFLAGDKDNVIDQ(+.98)IEKQAK.D                                     | N    | 58.20  | 2145.1316 | 19     | 1.4  | 716.0521  | 3 | 33.04 | 43       | F43:1686 | OB5956 H1 Ro.raw  | 1.2153E5            | 1        | 1                       | 536   | 554 | Deamidation (NQ)                      | Q13:Deamidation (NQ):25.1                                                                                     | PEAKS DB  |
| total 244 peptides                                                |      |        |           |        |      |           |   |       |          |          |                   |                     |          |                         |       |     |                                       |                                                                                                               |           |

| Peptide                                        | Uniq | -10lgP | Mass      | Length | ppm  | m/z       | z | RT    | Fraction | Scan     | Source File       | Area Roasted in gel | #Feature | #Feature Roasted in gel | Start | End | PTM                                   | AScore                                                  | Found By  |
|------------------------------------------------|------|--------|-----------|--------|------|-----------|---|-------|----------|----------|-------------------|---------------------|----------|-------------------------|-------|-----|---------------------------------------|---------------------------------------------------------|-----------|
|                                                |      |        |           |        |      |           |   |       |          |          |                   |                     |          |                         |       |     |                                       | 8                                                       |           |
| R.VAKISM(+15.99)PVNTPGQFEDFFPASSR.D            | N    | 57.67  | 2540.2368 | 23     | 2.1  | 847.7546  | 3 | 32.98 | 42       | F42:1665 | OB5955 H1 Ro.raw  | 1.5427E5            | 1        | 1                       | 279   | 301 | Oxidation (M)                         | M6:Oxidation (M):1000.00                                | PEAKS DB  |
| K.G(+57.02)TGNLELVAVR.K                        | N    | 57.51  | 1184.6514 | 11     | -2.7 | 593.3314  | 2 | 30.10 | 42       | F42:1486 | OB5955 H1 Ro.raw  | 1.7196E5            | 2        | 2                       | 453   | 463 |                                       | G1:Carbamidomethylation (DHKE, X@N-term):19.78          | PEAKS PTM |
| R.IFLAGD(+57.02)KDNVIDQIEK.Q                   | N    | 57.43  | 1873.9785 | 16     | 1.7  | 625.6678  | 3 | 32.52 | 41       | F41:1637 | OB5954 H1 Ro.raw  | 2.7943E5            | 3        | 3                       | 536   | 551 |                                       | D6:Carbamidomethylation (DHKE, X@N-term):15.57          | PEAKS PTM |
| R.IFLAGDK(+15.99)DNVIDQIEK.Q                   | N    | 57.39  | 1832.9519 | 16     | -1.9 | 917.4814  | 2 | 31.99 | 41       | F41:1600 | OB5954 H1 Ro.raw  | 7.5922E5            | 2        | 2                       | 536   | 551 |                                       | K7:Oxidation or Hydroxylation:17.01                     | PEAKS PTM |
| N.PFYFPSRR.F                                   | N    | 57.34  | 1068.5504 | 8      | 1.1  | 535.2831  | 2 | 28.95 | 41       | F41:1414 | OB5954 H1 Ro.raw  | 4.6082E6            | 5        | 5                       | 168   | 175 |                                       |                                                         | PEAKS DB  |
| R.K(+27.99)SFNLDEGHALR.I                       | N    | 57.29  | 1413.7001 | 12     | 1.4  | 707.8583  | 2 | 28.46 | 42       | F42:1387 | OB5955 H1 Ro.raw  | 2.9777E4            | 1        | 1                       | 248   | 259 | Formylation                           | K1:Formylation:1000.00                                  | PEAKS PTM |
| R.LFEVKPDKKNPQLQDLDM(+15.99)MLTC(+57.02)VEIK.E | N    | 57.09  | 3147.6018 | 26     | -1.9 | 787.9062  | 4 | 34.20 | 41       | F41:1734 | OB5954 H1 Ro.raw  | 2.4894E6            | 4        | 4                       | 406   | 431 | Oxidation (M); Carbamidomethylation   | M18:Oxidation (M):33.98;C2:Carbamidomethylation:1000.00 | PEAKS DB  |
| K.SFNLDEGHALR(+31.99).I                        | N    | 55.96  | 1289.6000 | 11     | -1.4 | 645.8063  | 2 | 30.41 | 43       | F43:1520 | OB5956 H1 Ro.raw  | 0                   | 0        | 0                       | 249   | 259 | Dihydroxy                             | R11:Dihydroxy:119.59                                    | PEAKS PTM |
| K.ISMPVN(+.98)TPGQFEDFFPASSR.D                 | N    | 55.55  | 2227.0254 | 20     | 6.6  | 1114.5273 | 2 | 36.77 | 41       | F41:1885 | OB5954 H1 Ro.raw  | 1.01E5              | 2        | 2                       | 282   | 301 | Deamidation (NQ)                      | N6:Deamidation (NQ):42.68                               | PEAKS DB  |
| R.NTLEAAFAEFN(+.98)EIRR.V                      | N    | 54.77  | 1894.9172 | 16     | 1.8  | 948.4676  | 2 | 33.04 | 43       | F43:1685 | OB5956 H1 Ro.raw  | 2.2573E6            | 5        | 5                       | 313   | 328 | Deamidation (NQ)                      | N12:Deamidation (NQ):39.02                              | PEAKS DB  |
| V.QIEARPNTLVLPK.H                              | Y    | 54.45  | 1477.8616 | 13     | -1.8 | 739.9368  | 2 | 30.56 | 41       | F41:1513 | OB5954 H1 Ro.raw  | 1.5146E5            | 3        | 3                       | 210   | 222 |                                       |                                                         | PEAKS DB  |
| K.S(+57.02)FNLDEGHALRIPSGFISYILNR.H            | N    | 54.19  | 2675.3818 | 23     | 2.3  | 892.8033  | 3 | 39.35 | 38       | F38:1901 | OB5951 H3A Ro.raw | 6.7035E5            | 1        | 1                       | 249   | 271 | Carbamidomethylation (DHKE, X@N-term) | S1:Carbamidomethylation (DHKE, X@N-term):63.97          | PEAKS PTM |
| R.IFLAGDKDNVIDQIEK(+57.02)QAK.D                | N    | 54.07  | 2201.1692 | 19     | 0.3  | 734.7306  | 3 | 32.48 | 43       | F43:1657 | OB5956 H1 Ro.raw  | 1.2122E6            | 3        | 3                       | 536   | 554 |                                       | K16:Carbamidomethylation (DHKE, X@N-term):11.12         | PEAKS PTM |
| R.I(+27.99)PSGFISYILNR.H                       | N    | 53.77  | 1406.7557 | 12     | 0.7  | 704.3856  | 2 | 42.27 | 42       | F42:2199 | OB5955 H1 Ro.raw  | 0                   | 0        | 0                       | 260   | 271 | Formylation                           | I1:Formylation:1000.00                                  | PEAKS PTM |
| R.SKQFQNLQNH.R.I                               | Y    | 53.65  | 1398.7117 | 11     | 0.4  | 467.2447  | 3 | 24.16 | 43       | F43:1149 | OB5956 H1 Ro.raw  | 1.1379E5            | 3        | 3                       | 197   | 207 |                                       |                                                         | PEAKS DB  |
| R.IPSGFISYILNRHDN(+.98)QNLR.V                  | N    | 53.60  | 2257.1604 | 19     | -0.7 | 753.3936  | 3 | 34.26 | 41       | F41:1732 | OB5954 H1 Ro.raw  | 0                   | 0        | 0                       | 260   | 278 |                                       | N15:Deamidation (NQ):0.00                               | PEAKS DB  |
| K.HADADNILVIQQGQATVTVANGNNR.K                  | N    | 53.13  | 2618.3162 | 25     | 0.5  | 873.7798  | 3 | 30.34 | 38       | F38:1426 | OB5951 H3A Ro.raw | 1.8654E3            | 1        | 1                       | 223   | 247 |                                       |                                                         | PEAKS DB  |
| total 244 peptides                             |      |        |           |        |      |           |   |       |          |          |                   |                     |          |                         |       |     |                                       |                                                         |           |



| Peptide                                                | Uniq | -10lgP | Mass      | Length | ppm  | m/z       | z | RT    | Fraction | Scan     | Source File       | Area Roasted in gel | #Feature | #Feature Roasted in gel | Start | End | PTM                                   | AScore                                                                                | Found By  |
|--------------------------------------------------------|------|--------|-----------|--------|------|-----------|---|-------|----------|----------|-------------------|---------------------|----------|-------------------------|-------|-----|---------------------------------------|---------------------------------------------------------------------------------------|-----------|
| R.EGEQEWGTPGS(+42.01)EVR.E                             | Y    | 52.96  | 1601.6958 | 14     | 7.6  | 801.8613  | 2 | 27.46 | 43       | F43:1334 | OB5956 H1 Ro.raw  | 9.5213E4            | 3        | 3                       | 147   | 160 | Acetylation (TSCYH)                   | S11:Acetylation (TSCYH):32.97                                                         | PEAKS PTM |
| K.AM(+15.99)VIVVVKGTGNLELVAVRK.E                       | N    | 52.95  | 2225.2930 | 21     | -1.3 | 742.7706  | 3 | 32.42 | 42       | F42:1596 | OB5955 H1 Ro.raw  | 1.4247E6            | 3        | 3                       | 444   | 464 | Oxidation (M)                         | M2:Oxidation (M):1000.00                                                              | PEAKS DB  |
| K.KNPQLQ(+.98)DLDMMLTC(+57.02)VEIKEGALMLPHFNSK.A       | N    | 51.97  | 3500.7175 | 30     | 3.4  | 876.1896  | 4 | 36.93 | 43       | F43:1903 | OB5956 H1 Ro.raw  | 9.2646E6            | 2        | 2                       | 414   | 443 | Carbamidomethylation                  | Q6:Deamidation (N Q):14.04; C14:Carbamidomethylation:1000.00                          | PEAKS DB  |
| R.IFLAGDKDNVID.Q                                       | N    | 51.22  | 1318.6769 | 12     | -0.9 | 660.3451  | 2 | 31.76 | 43       | F43:1606 | OB5956 H1 Ro.raw  | 1.1173E5            | 3        | 3                       | 536   | 547 |                                       |                                                                                       | PEAKS DB  |
| K.ISM(+15.99)PVNTPGQFEDFFPASSRDQSSYLQGFSR.N            | N    | 50.25  | 3510.6150 | 31     | 0.3  | 1171.2126 | 3 | 35.35 | 36       | F36:1707 | OB5948 H3B Ro.raw | 2.4799E6            | 5        | 5                       | 282   | 312 | Oxidation (M)                         | M3:Oxidation (M):1000.00                                                              | PEAKS DB  |
| K.NPQLQLDMM(+15.99)LTC(+57.02)VEIKEGALMLPHFN(+.98)SK.A | N    | 49.99  | 3388.6174 | 29     | 6.1  | 848.1668  | 4 | 36.39 | 43       | F43:1880 | OB5956 H1 Ro.raw  | 1.7975E6            | 1        | 1                       | 415   | 443 | Oxidation (M); Carbamidomethylation   | M10:Oxidation (M):27.96; C13:Carbamidomethylation:1000.00; N27:Deamidation (NQ):18.27 | PEAKS DB  |
| R.N(-17.03)NPFYPSRR.F                                  | N    | 49.99  | 1279.6097 | 10     | 1.1  | 427.5443  | 3 | 28.89 | 43       | F43:1434 | OB5956 H1 Ro.raw  | 5.674E5             | 3        | 3                       | 166   | 175 |                                       | N1:Ammonia-loss (N):9.34                                                              | PEAKS PTM |
| R.EQWEEEEEEEEEGSNREVR.R                                | N    | 49.84  | 2665.0535 | 21     | 2.4  | 889.3605  | 3 | 27.88 | 41       | F41:1353 | OB5954 H1 Ro.raw  | 4.9786E4            | 1        | 1                       | 473   | 493 |                                       |                                                                                       | PEAKS DB  |
| T.GNLELVAVRK.E                                         | N    | 49.53  | 1097.6556 | 10     | 0.5  | 549.8354  | 2 | 27.00 | 42       | F42:1296 | OB5955 H1 Ro.raw  | 3.4872E5            | 3        | 3                       | 455   | 464 |                                       |                                                                                       | PEAKS DB  |
| R.VAKIS(+77.99)MPVNTPGQFEDFFPASSR.D                    | N    | 49.16  | 2602.2290 | 23     | 3.0  | 1302.1257 | 2 | 38.06 | 42       | F42:1958 | OB5955 H1 Ro.raw  | 0                   | 0        | 0                       | 279   | 301 | Methylphosphorylation                 | S5:Methylphosphorylation:56.99                                                        | PEAKS PTM |
| F.PGSGEQVEK.L                                          | N    | 49.06  | 929.4454  | 9      | -3.7 | 465.7282  | 2 | 30.34 | 43       | F43:1524 | OB5956 H1 Ro.raw  | 5.2705E4            | 1        | 1                       | 559   | 567 |                                       |                                                                                       | PEAKS DB  |
| K.AMVIVVVK(+57.02)GTGNLELVAVRK.E                       | N    | 48.92  | 2266.3196 | 21     | 1.3  | 756.4481  | 3 | 33.23 | 43       | F43:1673 | OB5956 H1 Ro.raw  | 3.1193E6            | 1        | 1                       | 444   | 464 |                                       | K9:Carbamidomethylation (DHKE, X@N-term):8.78                                         | PEAKS PTM |
| R.EEDWRQPR.E                                           | N    | 48.87  | 1114.5155 | 8      | 1.8  | 558.2661  | 2 | 23.91 | 41       | F41:1112 | OB5954 H1 Ro.raw  | 1.6791E3            | 1        | 1                       | 120   | 127 |                                       |                                                                                       | PEAKS DB  |
| R.PNTLVLPK.H                                           | N    | 48.84  | 880.5382  | 8      | -2.9 | 441.2751  | 2 | 28.00 | 43       | F43:1374 | OB5956 H1 Ro.raw  | 1.9234E5            | 2        | 2                       | 215   | 222 |                                       |                                                                                       | PEAKS DB  |
| L.R(+27.99)IPSGFISYILNR.H                              | N    | 48.25  | 1562.8568 | 13     | -2.0 | 782.4341  | 2 | 37.84 | 43       | F43:1976 | OB5956 H1 Ro.raw  | 1.5108E5            | 1        | 1                       | 259   | 271 | Formylation                           | R1:Formylation:1000.00                                                                | PEAKS PTM |
| R.EGEQEW(+15.99)GTPGSEVREETSR.N                        | Y    | 48.10  | 2177.9460 | 19     | 1.6  | 726.9905  | 3 | 26.51 | 43       | F43:1296 | OB5956 H1 Ro.raw  | 8.9341E6            | 3        | 3                       | 147   | 165 | Oxidation (HW)                        | W6:Oxidation (HW):1000.00                                                             | PEAKS PTM |
| R.I(+57.02)VQIEARPNTLVLPK.H                            | Y    | 46.89  | 1747.0355 | 15     | -0.2 | 874.5248  | 2 | 30.98 | 42       | F42:1537 | OB5955 H1 Ro.raw  | 9.1688E5            | 3        | 3                       | 208   | 222 | Carbamidomethylation (DHKE, X@N-term) | I1:Carbamidomethylation (DHKE, X@N-term):69.71                                        | PEAKS PTM |
| total 244 peptides                                     |      |        |           |        |      |           |   |       |          |          |                   |                     |          |                         |       |     |                                       |                                                                                       |           |

| Peptide                                                   | Uniq | -10lgP | Mass      | Length | ppm  | m/z       | z | RT    | Fraction | Scan     | Source File      | Area Roasted in gel | #Feature | #Feature Roasted in gel | Start | End | PTM                                       | AScore                                                                                 | Found By  |
|-----------------------------------------------------------|------|--------|-----------|--------|------|-----------|---|-------|----------|----------|------------------|---------------------|----------|-------------------------|-------|-----|-------------------------------------------|----------------------------------------------------------------------------------------|-----------|
| R.N(+.98)TLEAFNAEFNEIR.R                                  | N    | 46.63  | 1738.8162 | 15     | 9.2  | 870.4233  | 2 | 44.36 | 42       | F42:2303 | OB5955 H1 Ro.raw | 5.4416E3            | 1        | 1                       | 313   | 327 | Deamidation (NQ)                          | N1:Deamidation (NQ):39.47                                                              | PEAKS DB  |
| R.VLLE(+21.98)ENAGGEQEER.G                                | N    | 46.37  | 1593.7246 | 14     | -1.1 | 797.8687  | 2 | 26.71 | 43       | F43:1300 | OB5956 H1 Ro.raw | 4.0134E5            | 3        | 3                       | 329   | 342 | Sodium adduct                             | E4:Sodium adduct:40.00                                                                 | PEAKS PTM |
| N.PFYFPSR.R                                               | N    | 46.32  | 912.4493  | 7      | -0.1 | 457.2319  | 2 | 31.70 | 42       | F42:1584 | OB5955 H1 Ro.raw | 2.4653E5            | 4        | 4                       | 168   | 174 |                                           |                                                                                        | PEAKS DB  |
| K.GTGNLELVAVRKEQQQR.G                                     | N    | 46.31  | 1925.0442 | 17     | 1.4  | 642.6896  | 3 | 26.67 | 43       | F43:1294 | OB5956 H1 Ro.raw | 2.1018E4            | 1        | 1                       | 453   | 469 |                                           |                                                                                        | PEAKS DB  |
| K.NPQLQDLD(+14.02)MMLTC(+57.02)VEIK.E                     | N    | 45.99  | 2060.9944 | 17     | 0.2  | 1031.5046 | 2 | 37.33 | 41       | F41:1934 | OB5954 H1 Ro.raw | 2.7407E4            | 1        | 1                       | 415   | 431 | Methylation(others); Carbamidomethylation | D8:Methylation(others):42.68; C13:Carbamidomethylation:1000.00                         | PEAKS PTM |
| K.GTGNLE(+57.02)LVAVRK.E                                  | N    | 45.75  | 1312.7462 | 12     | -0.8 | 657.3799  | 2 | 27.17 | 42       | F42:1295 | OB5955 H1 Ro.raw | 1.9882E5            | 1        | 1                       | 453   | 464 |                                           | E6:Carbamidomethylation (DHKE, X@N-term):0.00                                          | PEAKS PTM |
| K.A(+43.01)MVIVVVKGTGNLELVAVR.K                           | N    | 45.64  | 2124.2090 | 20     | 0.7  | 1063.1125 | 2 | 33.65 | 41       | F41:1688 | OB5954 H1 Ro.raw | 8.0739E4            | 1        | 1                       | 444   | 463 | Carbamylation                             | A1:Carbamylation:161.20                                                                | PEAKS PTM |
| R.VLLEEN(+.98)AGGEQEERGQR.R                               | N    | 45.60  | 1913.9078 | 17     | -1.6 | 638.9755  | 3 | 25.99 | 41       | F41:1234 | OB5954 H1 Ro.raw | 0                   | 0        | 0                       | 329   | 345 | Deamidation (NQ)                          | N6:Deamidation (NQ):28.79                                                              | PEAKS DB  |
| K.KNPQLQDLDM(+15.99)LTC(+57.02)VEIKEGALM(+15.99)LPHFNSK.A | N    | 45.45  | 3531.7234 | 30     | -1.1 | 883.9372  | 4 | 35.80 | 42       | F42:1822 | OB5955 H1 Ro.raw | 0                   | 0        | 0                       | 414   | 443 | Carbamidomethylation; Oxidation (M)       | M11:Oxidation (M):0.00;C14:Carbamidomethylation:1000.00;M23:Oxidation (M):45.87        | PEAKS DB  |
| R.LFEVKPKKNPQLQDLDM(+15.99)M(+15.99)LTC(+57.02)VEIK.E     | N    | 45.43  | 3163.5967 | 26     | -2.8 | 791.9042  | 4 | 32.90 | 41       | F41:1650 | OB5954 H1 Ro.raw | 2.0535E6            | 3        | 3                       | 406   | 431 | Oxidation (M); Carbamidomethylation       | M18:Oxidation (M):1000.00; M19:Oxidation (M):1000.00; C22:Carbamidomethylation:1000.00 | PEAKS DB  |
| R.KSFNLDEGH(+15.99)ALR.I                                  | N    | 45.40  | 1401.7001 | 12     | 3.9  | 701.8600  | 2 | 27.64 | 43       | F43:1349 | OB5956 H1 Ro.raw | 6.6479E4            | 2        | 2                       | 248   | 259 | Oxidation (HW)                            | H9:Oxidation (HW):1000.00                                                              | PEAKS PTM |
| K.KNPQLQDLDM(+15.99)MLTC(+57.02)VEIKEGALMLPHFNSK.A        | N    | 44.60  | 3515.7285 | 30     | -1.9 | 879.9377  | 4 | 35.30 | 41       | F41:1798 | OB5954 H1 Ro.raw | 6.4162E5            | 1        | 1                       | 414   | 443 | Carbamidomethylation                      | M10:Oxidation (M):14.02;C14:Carbamidomethylation:1000.00                               | PEAKS DB  |
| R.DQSSYLQGFSR(+15.99).N                                   | N    | 44.15  | 1302.5840 | 11     | 2.5  | 652.3009  | 2 | 30.79 | 43       | F43:1544 | OB5956 H1 Ro.raw | 1.4308E5            | 3        | 3                       | 302   | 312 | Oxidation or Hydroxylation                | R11:Oxidation or Hydroxylation:42.88                                                   | PEAKS PTM |
| K.Q(+.98)FQNLQNHR.I                                       | N    | 43.70  | 1184.5686 | 9      | 4.6  | 593.2943  | 2 | 23.68 | 42       | F42:1098 | OB5955 H1 Ro.raw | 0                   | 0        | 0                       | 199   | 207 | Deamidation (NQ)                          | Q1:Deamidation (NQ):39.25                                                              | PEAKS DB  |
| K.I(+57.02)SMPVNTPGQFEDFFPASSR.D                          | N    | 42.37  | 2283.0630 | 20     | -0.7 | 1142.5380 | 2 | 36.01 | 43       | F43:1860 | OB5956 H1 Ro.raw | 1.8515E5            | 1        | 1                       | 282   | 301 | Carbamidomethylation (DHKE, X@N-term)     | I1:Carbamidomethylation (DHKE, X@N-term):50.99                                         | PEAKS PTM |
| total 244 peptides                                        |      |        |           |        |      |           |   |       |          |          |                  |                     |          |                         |       |     |                                           |                                                                                        |           |

| Peptide                                                         | Uniq | -10lgP | Mass      | Length | ppm  | m/z       | z | RT    | Fraction | Scan     | Source File       | Area Roasted in gel | #Feature | #Feature Roasted in gel | Start | End | PTM                                                   | AScore                                                                                                     | Found By  |
|-----------------------------------------------------------------|------|--------|-----------|--------|------|-----------|---|-------|----------|----------|-------------------|---------------------|----------|-------------------------|-------|-----|-------------------------------------------------------|------------------------------------------------------------------------------------------------------------|-----------|
| K.ISM(-48.00)PVNTPGQGFEDFFPASSR.D                               | N    | 42.09  | 2178.0381 | 20     | 2.8  | 727.0220  | 3 | 32.48 | 43       | F43:1652 | OB5956 H1 Ro.raw  | 5.8583E6            | 3        | 3                       | 282   | 301 | Dethiomethyl                                          | M3:Dethio methyl:1000.00                                                                                   | PEAKS PTM |
| R.SKQFQNLQNH(+15.99)R.I                                         | Y    | 41.84  | 1414.7065 | 11     | 2.4  | 708.3622  | 2 | 24.12 | 42       | F42:1124 | OB5955 H1 Ro.raw  | 1.2986E3            | 1        | 1                       | 197   | 207 | Oxidation (HW)                                        | H10:Oxidation (H W):1000.00                                                                                | PEAKS PTM |
| K.KGSEEEEDIT(-18.01)N(+.98)PINLR.D                              | N    | 41.27  | 1696.8268 | 15     | 2.3  | 566.6175  | 3 | 29.07 | 43       | F43:1442 | OB5956 H1 Ro.raw  | 3.8118E5            | 3        | 3                       | 379   | 393 | Dehydration; Deamidation (NQ)                         | T9:Dehydration:45.01;N10:Deamidation (NQ):59.10                                                            | PEAKS PTM |
| K.NPQLQDLDMM(+15.99)LTC(+57.02)VEIKEGALM(+15.99)LPHFN(+.98)SK.A | N    | 41.25  | 3404.6125 | 29     | -0.4 | 1135.8777 | 3 | 36.69 | 42       | F42:1878 | OB5955 H1 Ro.raw  | 3.8423E5            | 1        | 1                       | 415   | 443 | Carbamidomethylation; Oxidation (M); Deamidation (NQ) | M10:Oxidation (M):0.00;C13:Carbamidomethylation:1000.00;M22:Oxidation (M):39.23;N27:Deamidation (NQ):69.52 | PEAKS DB  |
| R.REQEW(+15.99)EEEEEEEEEGSNR.E                                  | N    | 41.18  | 2452.9375 | 19     | -0.6 | 818.6526  | 3 | 25.98 | 41       | F41:1239 | OB5954 H1 Ro.raw  | 2.4114E4            | 1        | 1                       | 472   | 490 | Oxidation (HW)                                        | W5:Oxidation (H W):1000.00                                                                                 | PEAKS PTM |
| K.DLAFP(+15.99)GSGEQVEK.L                                       | N    | 41.14  | 1391.6569 | 13     | 0.5  | 696.8361  | 2 | 29.36 | 42       | F42:1432 | OB5955 H1 Ro.raw  | 7.4528E5            | 3        | 3                       | 555   | 567 | Oxidation or Hydroxylation                            | P5:Oxidation or Hydroxylation:67.76                                                                        | PEAKS PTM |
| K.AMVVVVN(+.98)KGTGNLELVAVRK.E                                  | N    | 41.03  | 2210.2820 | 21     | 1.9  | 1106.1504 | 2 | 34.35 | 42       | F42:1720 | OB5955 H1 Ro.raw  | 4.5718E5            | 1        | 1                       | 444   | 464 | Deamidation (NQ)                                      | N8:Deamidation (NQ):28.79                                                                                  | PEAKS DB  |
| K.EGALM(-48.00)LPHFNSK.A                                        | N    | 40.53  | 1294.6670 | 12     | 0.5  | 432.5632  | 3 | 28.76 | 41       | F41:1389 | OB5954 H1 Ro.raw  | 2.208E6             | 2        | 2                       | 432   | 443 | Dethiomethyl                                          | M5:Dethio methyl:1000.00                                                                                   | PEAKS PTM |
| R.VLLEENAGGEQEERGQRR.R                                          | N    | 40.17  | 2069.0249 | 18     | 1.0  | 518.2640  | 4 | 25.49 | 42       | F42:1205 | OB5955 H1 Ro.raw  | 2.0305E5            | 2        | 2                       | 329   | 346 |                                                       |                                                                                                            | PEAKS DB  |
| R.VLLEENAGGEQEER(+15.99).G                                      | N    | 39.98  | 1587.7375 | 14     | 1.8  | 794.8775  | 2 | 26.70 | 41       | F41:1275 | OB5954 H1 Ro.raw  | 0                   | 0        | 0                       | 329   | 342 | Oxidation or Hydroxylation                            | R14:Oxidation or Hydroxylation:20.88                                                                       | PEAKS PTM |
| R.N(+27.99)TLEAAFNAFNEIRR.V                                     | N    | 39.68  | 1921.9282 | 16     | -1.7 | 961.9697  | 2 | 37.51 | 41       | F41:1908 | OB5954 H1 Ro.raw  | 3.7767E4            | 1        | 1                       | 313   | 328 | Formylation                                           | N1:Formylation:1000.00                                                                                     | PEAKS PTM |
| K.E(-18.01)GALM(+15.99)LPHFNSK.A                                | N    | 39.64  | 1340.6547 | 12     | 0.2  | 447.8923  | 3 | 30.21 | 41       | F41:1479 | OB5954 H1 Ro.raw  | 7.81E5              | 1        | 1                       | 432   | 443 | Pyro-glu from E; Oxidation (M)                        | E1:Pyro-glu from E:1000.00; M5:Oxidation (M):1000.00                                                       | PEAKS PTM |
| R.VLLEE(+53.92)NAGGEQEER.G                                      | N    | 39.58  | 1625.6620 | 14     | -1.0 | 542.8940  | 3 | 26.76 | 42       | F42:1278 | OB5955 H1 Ro.raw  | 0                   | 0        | 0                       | 329   | 342 | Replacement of 2 protons by iron                      | E5:Replacement of 2 protons by iron:20.92                                                                  | PEAKS PTM |
| D.GEPDLSNNFGR.L                                                 | N    | 39.46  | 1204.5472 | 11     | 3.0  | 603.2827  | 2 | 28.20 | 41       | F41:1371 | OB5954 H1 Ro.raw  | 1.5511E4            | 1        | 1                       | 395   | 405 |                                                       |                                                                                                            | PEAKS DB  |
| K.HADADNILVIQQGQ(+.98)ATVTVANGNNRK.S                            | N    | 39.33  | 2747.3950 | 26     | 2.6  | 916.8103  | 3 | 30.46 | 30       | F30:1280 | OB5926 H3B Ro.raw | 0                   | 0        | 0                       | 223   | 248 |                                                       | Q14:Deamidation (NQ):5.07                                                                                  | PEAKS DB  |
| K.NPQLQ(+.98)DLDMM(+15.99)LTC(+57.02)VEIKEGALM(+15.99)LPHFNSK.A | N    | 39.15  | 3404.6125 | 29     | -1.8 | 852.1589  | 4 | 38.22 | 43       | F43:1993 | OB5956 H1 Ro.raw  | 7.6266E5            | 1        | 1                       | 415   | 443 | Deamidation (NQ); Carbamidomethylation                | Q5:Deamidation (NQ):49.79; M10:Oxidation (M):0.00;C13:                                                     | PEAKS DB  |
| total 244 peptides                                              |      |        |           |        |      |           |   |       |          |          |                   |                     |          |                         |       |     |                                                       |                                                                                                            |           |

| Peptide                                                 | Uniq | -10lgP | Mass      | Length | ppm  | m/z       | z | RT    | Fraction | Scan     | Source File      | Area Roasted in gel | #Feature | #Feature Roasted in gel | Start | End | PTM                               | AScore                                                                          | Found By  |
|---------------------------------------------------------|------|--------|-----------|--------|------|-----------|---|-------|----------|----------|------------------|---------------------|----------|-------------------------|-------|-----|-----------------------------------|---------------------------------------------------------------------------------|-----------|
|                                                         |      |        |           |        |      |           |   |       |          |          |                  |                     |          |                         |       |     |                                   | Carbamidomethylation:1000.00;M22:Oxidation (M):14.60                            |           |
| K.N(+.98)PQLQDLDM(+15.99)MLTC(+57.02)VEIKEGALMLPHFNSK.A | N    | 38.83  | 3388.6174 | 29     | 8.2  | 1695.3300 | 2 | 37.72 | 41       | F41:1941 | OB5954 H1 Ro.raw | 6.4698E5            | 1        | 1                       | 415   | 443 | Carbamidomethylation              | N1:Deamidation (NQ):0.00;M9:Oxidation (M):0.00;C13:Carbamidomethylation:1000.00 | PEAKS DB  |
| K.D(+15.99)LAFPGSGEQVEK.L                               | N    | 38.81  | 1391.6569 | 13     | 0.5  | 696.8361  | 2 | 29.36 | 42       | F42:1368 | OB5955 H1 Ro.raw | 2.5725E5            | 1        | 1                       | 555   | 567 | Oxidation or Hydroxylation        | D1:Oxidation or Hydroxylation:77.13                                             | PEAKS PTM |
| K.NPQ(+.98)LQDLDMMLTC(+57.02)VEIK.E                     | N    | 38.70  | 2047.9629 | 17     | 2.9  | 1024.9917 | 2 | 46.45 | 41       | F41:2441 | OB5954 H1 Ro.raw | 0                   | 0        | 0                       | 415   | 431 | Carbamidomethylation              | Q3:Deamidation (NQ):14.04;C13:Carbamidomethylation:1000.00                      | PEAKS DB  |
| R.IFLAGD(+15.99)KDNVIDQIEK.Q                            | N    | 38.52  | 1832.9519 | 16     | 1.9  | 917.4850  | 2 | 31.89 | 42       | F42:1590 | OB5955 H1 Ro.raw | 4.6198E5            | 1        | 1                       | 536   | 551 |                                   | D6:Oxidation or Hydroxylation:12.60                                             | PEAKS PTM |
| R.IFLAGDKDN(+.98)VIDQIEKQ(+.98)AK.D                     | N    | 37.85  | 2146.1157 | 19     | 9.8  | 716.3862  | 3 | 32.98 | 42       | F42:1661 | OB5955 H1 Ro.raw | 8.6625E4            | 1        | 1                       | 536   | 554 |                                   | N9:Deamidation (NQ):13.83;Q17:Deamidation (NQ):17.65                            | PEAKS DB  |
| K.DLAFPGSGE(+53.92)QVEK.L                               | N    | 37.31  | 1429.5812 | 13     | -6.3 | 715.7933  | 2 | 30.34 | 43       | F43:1518 | OB5956 H1 Ro.raw | 2.6492E5            | 1        | 1                       | 555   | 567 | Replacement of 2 protons by iron  | E9:Replacement of 2 protons by iron:37.54                                       | PEAKS PTM |
| R.W(+15.99)GPAEPR.E                                     | Y    | 36.73  | 827.3926  | 7      | 0.0  | 414.7036  | 2 | 24.54 | 42       | F42:1155 | OB5955 H1 Ro.raw | 3.7087E3            | 1        | 1                       | 109   | 115 | Oxidation (HW)                    | W1:Oxidation (HW):1000.00                                                       | PEAKS PTM |
| K.GT(-18.01)GNLELVAVRK.E                                | N    | 36.73  | 1237.7142 | 12     | 2.6  | 413.5797  | 3 | 27.00 | 42       | F42:1287 | OB5955 H1 Ro.raw | 4.7714E5            | 1        | 1                       | 453   | 464 | Dehydration                       | T2:Dehydration:1000.00                                                          | PEAKS PTM |
| K.IRPEGREGGEQEWGTPGSEVREETSR.N                          | Y    | 36.52  | 2870.3542 | 25     | 2.3  | 718.5975  | 4 | 27.83 | 43       | F43:1355 | OB5956 H1 Ro.raw | 1.3647E5            | 1        | 1                       | 141   | 165 |                                   |                                                                                 | PEAKS DB  |
| R.NT(-18.01)LEAAFAEFNEIRR.V                             | N    | 36.45  | 1875.9227 | 16     | 0.7  | 626.3153  | 3 | 34.16 | 43       | F43:1739 | OB5956 H1 Ro.raw | 6.9172E6            | 2        | 2                       | 313   | 328 | Dehydration                       | T2:Dehydration:1000.00                                                          | PEAKS PTM |
| K.EGALM(+15.99)LPHFN(+.98)SK.A                          | N    | 36.41  | 1359.6493 | 12     | 2.8  | 680.8338  | 2 | 31.22 | 41       | F41:1550 | OB5954 H1 Ro.raw | 0                   | 0        | 0                       | 432   | 443 | Oxidation (M); Deamidation (NQ)   | M5:Oxidation (M):1000.00;N10:Deamidation (NQ):1000.00                           | PEAKS DB  |
| R.DQSSY(-18.01)LQGFSR.N                                 | N    | 36.32  | 1268.5785 | 11     | -0.6 | 635.2961  | 2 | 30.85 | 43       | F43:1579 | OB5956 H1 Ro.raw | 2.378E5             | 1        | 1                       | 302   | 312 |                                   | Y5:Dehydration:0.00                                                             | PEAKS PTM |
| R.C(+57.02)LQS(-18.01)C(+57.02)Q(+.98)QEPDDLKQK.A       | N    | 36.24  | 1858.8190 | 15     | -0.1 | 930.4167  | 2 | 28.47 | 31       | F31:1350 | OB5942 H6 Ro.raw | 0                   | 0        | 0                       | 40    | 54  | Carbamidomethylation; Dehydration | C1:Carbamidomethylation:1000.00;S4:Dehydration:39.55;C5:Carbamidomethylation:10 | PEAKS PTM |
| total 244 peptides                                      |      |        |           |        |      |           |   |       |          |          |                  |                     |          |                         |       |     |                                   |                                                                                 |           |

| Peptide                                                 | Uniq | -10lgP | Mass      | Length | ppm  | m/z       | z | RT    | Fraction | Scan     | Source File      | Area Roasted in gel | #Feature | #Feature Roasted in gel | Start | End | PTM                  | AScore                                                                               | Found By  |
|---------------------------------------------------------|------|--------|-----------|--------|------|-----------|---|-------|----------|----------|------------------|---------------------|----------|-------------------------|-------|-----|----------------------|--------------------------------------------------------------------------------------|-----------|
|                                                         |      |        |           |        |      |           |   |       |          |          |                  |                     |          |                         |       |     |                      | 00.00;Q6: Deamidation (NQ): 8.69                                                     |           |
| M.LPHFNSK.A                                             | N    | 36.02  | 841.4446  | 7      | 1.3  | 421.7301  | 2 | 30.63 | 42       | F42:1510 | OB5955 H1 Ro.raw | 1.4673E6            | 2        | 2                       | 437   | 443 |                      |                                                                                      | PEAKS DB  |
| K.NPQLQLDLM(-48.00)MLTC(+57.02)VEIK.E                   | N    | 35.81  | 1998.9755 | 17     | 6.7  | 667.3369  | 3 | 34.52 | 43       | F43:1773 | OB5956 H1 Ro.raw | 8.4276E5            | 1        | 1                       | 415   | 431 | Carbamidomethylation | M9:Dethio methyl:1 1.06;C13: Carbamidomethylation:1000.00                            | PEAKS PTM |
| K.SF(+17.99)NLDEGHALR.I                                 | N    | 34.75  | 1275.6007 | 11     | 8.1  | 638.8128  | 2 | 26.62 | 42       | F42:1267 | OB5955 H1 Ro.raw | 9.5828E3            | 1        | 1                       | 249   | 259 | Fluorination         | F2:Fluorination:100 0.00                                                             | PEAKS PTM |
| K.KNPQLQ(+.98)DLDM(+15.99)LTC(+57.02)VEIKEGALMLPHFNSK.A | N    | 33.72  | 3516.7124 | 30     | 3.3  | 880.1883  | 4 | 35.48 | 41       | F41:1798 | OB5954 H1 Ro.raw | 7.5658E5            | 1        | 1                       | 414   | 443 | Carbamidomethylation | Q6:Deamidation (NQ):18.55; M11:Oxidation (M): 14.02;C14:Carbamidomethylation:1000.00 | PEAKS DB  |
| K.VSKEH(+15.99)VQELTK.H                                 | N    | 33.71  | 1312.6986 | 11     | 1.8  | 657.3578  | 2 | 23.73 | 42       | F42:1100 | OB5955 H1 Ro.raw | 1.3581E3            | 1        | 1                       | 361   | 371 | Oxidation (HW)       | H5:Oxidation (HW): 1000.00                                                           | PEAKS PTM |
| D.QSSYLQGFSSR.N                                         | N    | 33.26  | 1171.5621 | 10     | 2.1  | 586.7896  | 2 | 29.36 | 42       | F42:1431 | OB5955 H1 Ro.raw | 3.3134E4            | 1        | 1                       | 303   | 312 |                      |                                                                                      | PEAKS DB  |
| R.IFLAGDKDNVID(-18.01)QIEK.Q                            | N    | 33.09  | 1798.9464 | 16     | 0.7  | 900.4811  | 2 | 31.39 | 43       | F43:1591 | OB5956 H1 Ro.raw | 6.7846E4            | 1        | 1                       | 536   | 551 |                      | D12:Dehydration:1 3.16                                                               | PEAKS PTM |
| R.EREEDWRQPR.E                                          | N    | 32.92  | 1399.6592 | 10     | 5.7  | 700.8409  | 2 | 24.05 | 43       | F43:1141 | OB5956 H1 Ro.raw | 4.1173E4            | 1        | 1                       | 118   | 127 |                      |                                                                                      | PEAKS DB  |
| D.NVIDQIEK.Q                                            | N    | 32.64  | 957.5131  | 8      | 1.6  | 479.7646  | 2 | 28.19 | 42       | F42:1367 | OB5955 H1 Ro.raw | 3.0062E3            | 1        | 1                       | 544   | 551 |                      |                                                                                      | PEAKS DB  |
| K.AM(-48.00)VIVVVNK.G                                   | N    | 32.49  | 923.5804  | 9      | 0.0  | 462.7975  | 2 | 25.00 | 43       | F43:1192 | OB5956 H1 Ro.raw | 6.3177E3            | 1        | 1                       | 444   | 452 | Dethiomethyl         | M2:Dethio methyl:10 00.00                                                            | PEAKS PTM |
| R.D(-18.01)QSSYLQGFSSR.N                                | N    | 31.95  | 1268.5785 | 11     | 1.6  | 635.2975  | 2 | 29.92 | 43       | F43:1489 | OB5956 H1 Ro.raw | 0                   | 0        | 0                       | 302   | 312 |                      | D1:Dehydration:0.0 0                                                                 | PEAKS PTM |
| R.IFLAGDKD(-18.01)NVIDQIEK.Q                            | N    | 31.82  | 1798.9464 | 16     | -0.9 | 600.6555  | 3 | 32.15 | 43       | F43:1589 | OB5956 H1 Ro.raw | 3.5634E5            | 1        | 1                       | 536   | 551 | Dehydration          | D8:Dehydration:30. 83                                                                | PEAKS PTM |
| K.D(+53.92)LAPPGSGEQVEK.L                               | N    | 31.27  | 1429.5812 | 13     | -4.3 | 715.7948  | 2 | 30.56 | 41       | F41:1500 | OB5954 H1 Ro.raw | 3.7719E5            | 1        | 1                       | 555   | 567 |                      | D1:Replacement of 2 protons by iron:0. 00                                            | PEAKS PTM |
| K.SFNLDE(+53.92)GHALR.I                                 | N    | 31.27  | 1311.5294 | 11     | 1.0  | 438.1842  | 3 | 28.04 | 41       | F41:1362 | OB5954 H1 Ro.raw | 5.8053E4            | 1        | 1                       | 249   | 259 |                      | E6:Replacement of 2 protons by iron:1 6.90                                           | PEAKS PTM |
| K.AM(+15.99)VIVVVNK(+57.02)GTGNLELVAVR.K                | N    | 30.97  | 2154.2195 | 20     | 2.8  | 1078.1200 | 2 | 32.98 | 42       | F42:1664 | OB5955 H1 Ro.raw | 2.0029E5            | 1        | 1                       | 444   | 463 | Oxidation (M)        | M2:Oxidation (M):1 000.00;K 9:Carbamidomethylation (DHK E, X@N-term):0.00            | PEAKS PTM |
| K.KNPQLQLDMM(+15.99)LTC(+57.02)VEIKEGALMLPHFNSK.A       | N    | 30.83  | 3515.7285 | 30     | 1.3  | 879.9406  | 4 | 35.25 | 42       | F42:1790 | OB5955 H1 Ro.raw | 0                   | 0        | 0                       | 414   | 443 | Carbamidomethylation | M11:Oxidation (M): 12.28;C1                                                          | PEAKS DB  |
| total 244 peptides                                      |      |        |           |        |      |           |   |       |          |          |                  |                     |          |                         |       |     |                      |                                                                                      |           |

| Peptide                                                                | Uniq | -10lgP | Mass      | Length | ppm  | m/z      | z | RT    | Fraction | Scan     | Source File       | Area Roasted in gel | #Feature | #Feature Roasted in gel | Start | End | PTM                                 | AScore                                                                                                             | Found By  |
|------------------------------------------------------------------------|------|--------|-----------|--------|------|----------|---|-------|----------|----------|-------------------|---------------------|----------|-------------------------|-------|-----|-------------------------------------|--------------------------------------------------------------------------------------------------------------------|-----------|
|                                                                        |      |        |           |        |      |          |   |       |          |          |                   |                     |          |                         |       |     |                                     | 4:Carbamidomethylation:1000.00                                                                                     |           |
| R.DQSSY(+15.99)LQGFSR.N                                                | N    | 30.72  | 1302.5840 | 11     | 1.6  | 652.3003 | 2 | 29.24 | 43       | F43:1470 | OB5956 H1 Ro.raw  | 6.7205E4            | 1        | 1                       | 302   | 312 | Oxidation or Hydroxylation          | Y5:Oxidation or Hydroxylation:26.36                                                                                | PEAKS PTM |
| K.SFNLDEGHALRIPSGFISYILNRHDNQ(+.98)LR.V                                | N    | 30.43  | 3496.7600 | 30     | 4.9  | 700.3627 | 5 | 37.51 | 39       | F39:1925 | OB5952 H3A Ro.raw | 2.7478E5            | 1        | 1                       | 249   | 278 |                                     | N28:Deamidation (NQ):10.11                                                                                         | PEAKS DB  |
| D.KDNVIDQIEK.Q                                                         | N    | 30.42  | 1200.6350 | 10     | -0.3 | 601.3246 | 2 | 26.31 | 42       | F42:1252 | OB5955 H1 Ro.raw  | 0                   | 0        | 0                       | 542   | 551 |                                     |                                                                                                                    | PEAKS DB  |
| N.TLEAAFNAEFNERR.V                                                     | N    | 30.42  | 1779.8904 | 15     | 3.5  | 890.9556 | 2 | 33.23 | 43       | F43:1696 | OB5956 H1 Ro.raw  | 1.5374E5            | 1        | 1                       | 314   | 328 |                                     |                                                                                                                    | PEAKS DB  |
| R.IPSGFISYILN(+15.99)R.H                                               | N    | 30.30  | 1394.7557 | 12     | -2.8 | 698.3832 | 2 | 36.42 | 41       | F41:1875 | OB5954 H1 Ro.raw  | 3.8045E5            | 1        | 1                       | 260   | 271 |                                     | N11:Oxidation or Hydroxylation:0.00                                                                                | PEAKS PTM |
| W.GTPGSEVREETS.R                                                       | Y    | 30.01  | 1403.6641 | 13     | 3.8  | 702.8420 | 2 | 27.77 | 42       | F42:1332 | OB5955 H1 Ro.raw  | 2.719E4             | 1        | 1                       | 153   | 165 |                                     |                                                                                                                    | PEAKS DB  |
| R.IFLAGDKD(-18.01)NV.I                                                 | N    | 30.00  | 1072.5553 | 10     | 0.7  | 537.2853 | 2 | 32.26 | 42       | F42:1603 | OB5955 H1 Ro.raw  | 2.1452E6            | 1        | 1                       | 536   | 545 | Dehydration                         | D8:Dehydration:45.01                                                                                               | PEAKS PTM |
| R.NTLEAAFNAEFN(+15.99)EIRR.V                                           | N    | 29.99  | 1909.9282 | 16     | 0.9  | 955.9723 | 2 | 32.98 | 42       | F42:1662 | OB5955 H1 Ro.raw  | 2.366E6             | 2        | 2                       | 313   | 328 |                                     | N12:Oxidation or Hydroxylation:0.00                                                                                | PEAKS PTM |
| R.IFLAGDKDNVIDQ(+.98)IEK.Q                                             | N    | 29.73  | 1817.9410 | 16     | 7.7  | 909.9848 | 2 | 63.08 | 43       | F43:3435 | OB5956 H1 Ro.raw  | 3.1606E3            | 1        | 1                       | 536   | 551 |                                     | Q13:Deamidation (NQ):11.12                                                                                         | PEAKS DB  |
| I.F(+127.06)LAGDKDNVIDQIEK.Q                                           | N    | 29.59  | 1830.9363 | 15     | 0.7  | 916.4761 | 2 | 32.18 | 41       | F41:1600 | OB5954 H1 Ro.raw  | 6.5822E4            | 1        | 1                       | 537   | 551 | N-Succinimidyl-2-morpholine acetate | F1:N-Succinimidyl-2-morpholine acetate:28.79                                                                       | PEAKS PTM |
| K.N(+.98)PQLQ(+.98)DLDMMLTC(+57.02)VEIKEGALM(+15.99)LPHFNSK.A          | N    | 29.50  | 3389.6016 | 29     | 9.6  | 848.4158 | 4 | 37.65 | 43       | F43:2047 | OB5956 H1 Ro.raw  | 6.1505E6            | 1        | 1                       | 415   | 443 | Carbamidomethylation                | N1:Deamidation (NQ):0.00;Q5:Deamidation (NQ):14.04;C13:Carbamidomethylation:1000.00;M22:Oxidation (M):0.00         | PEAKS DB  |
| R.NN(+.98)PFYFPSRR.F                                                   | N    | 29.19  | 1297.6204 | 10     | 9.3  | 649.8235 | 2 | 62.71 | 43       | F43:3425 | OB5956 H1 Ro.raw  | 0                   | 0        | 0                       | 166   | 175 |                                     | N2:Deamidation (NQ):7.21                                                                                           | PEAKS DB  |
| R.NTLEAAFNAEFN(+.98)EIR.R                                              | N    | 29.07  | 1738.8162 | 15     | 9.2  | 870.4233 | 2 | 44.36 | 42       | F42:2331 | OB5955 H1 Ro.raw  | 5.4416E3            | 1        | 1                       | 313   | 327 |                                     | N12:Deamidation (NQ):0.00                                                                                          | PEAKS DB  |
| K.KNPQ(+.98)LQ(+.98)DLDMM(+15.99)LTC(+57.02)VEIKEGALM(+15.99)LPHFNSK.A | N    | 28.74  | 3533.6914 | 30     | 9.7  | 884.4387 | 4 | 35.77 | 42       | F42:1822 | OB5955 H1 Ro.raw  | 2.7541E5            | 1        | 1                       | 414   | 443 | Carbamidomethylation; Oxidation (M) | Q4:Deamidation (NQ):8.22;Q6:Deamidation (NQ):5.55;M11:Oxidation (M):0.00;C14:C carbamidomethylation:1000.00;M23:Ox | PEAKS DB  |
| total 244 peptides                                                     |      |        |           |        |      |          |   |       |          |          |                   |                     |          |                         |       |     |                                     |                                                                                                                    |           |

| Peptide            | Uniq | -10lgP | Mass | Length | ppm | m/z | z | RT | Fraction | Scan | Source File | Area Roasted in gel | #Feature | #Feature Roasted in gel | Start | End | PTM | AScore            | Found By |
|--------------------|------|--------|------|--------|-----|-----|---|----|----------|------|-------------|---------------------|----------|-------------------------|-------|-----|-----|-------------------|----------|
|                    |      |        |      |        |     |     |   |    |          |      |             |                     |          |                         |       |     |     | idation (M):38.29 |          |
| total 244 peptides |      |        |      |        |     |     |   |    |          |      |             |                     |          |                         |       |     |     |                   |          |

N1NG13|N1NG13\_ARAHY

back to list

| [Protein Coverage](#) | [Supporting Peptides](#) |

Protein Coverage:

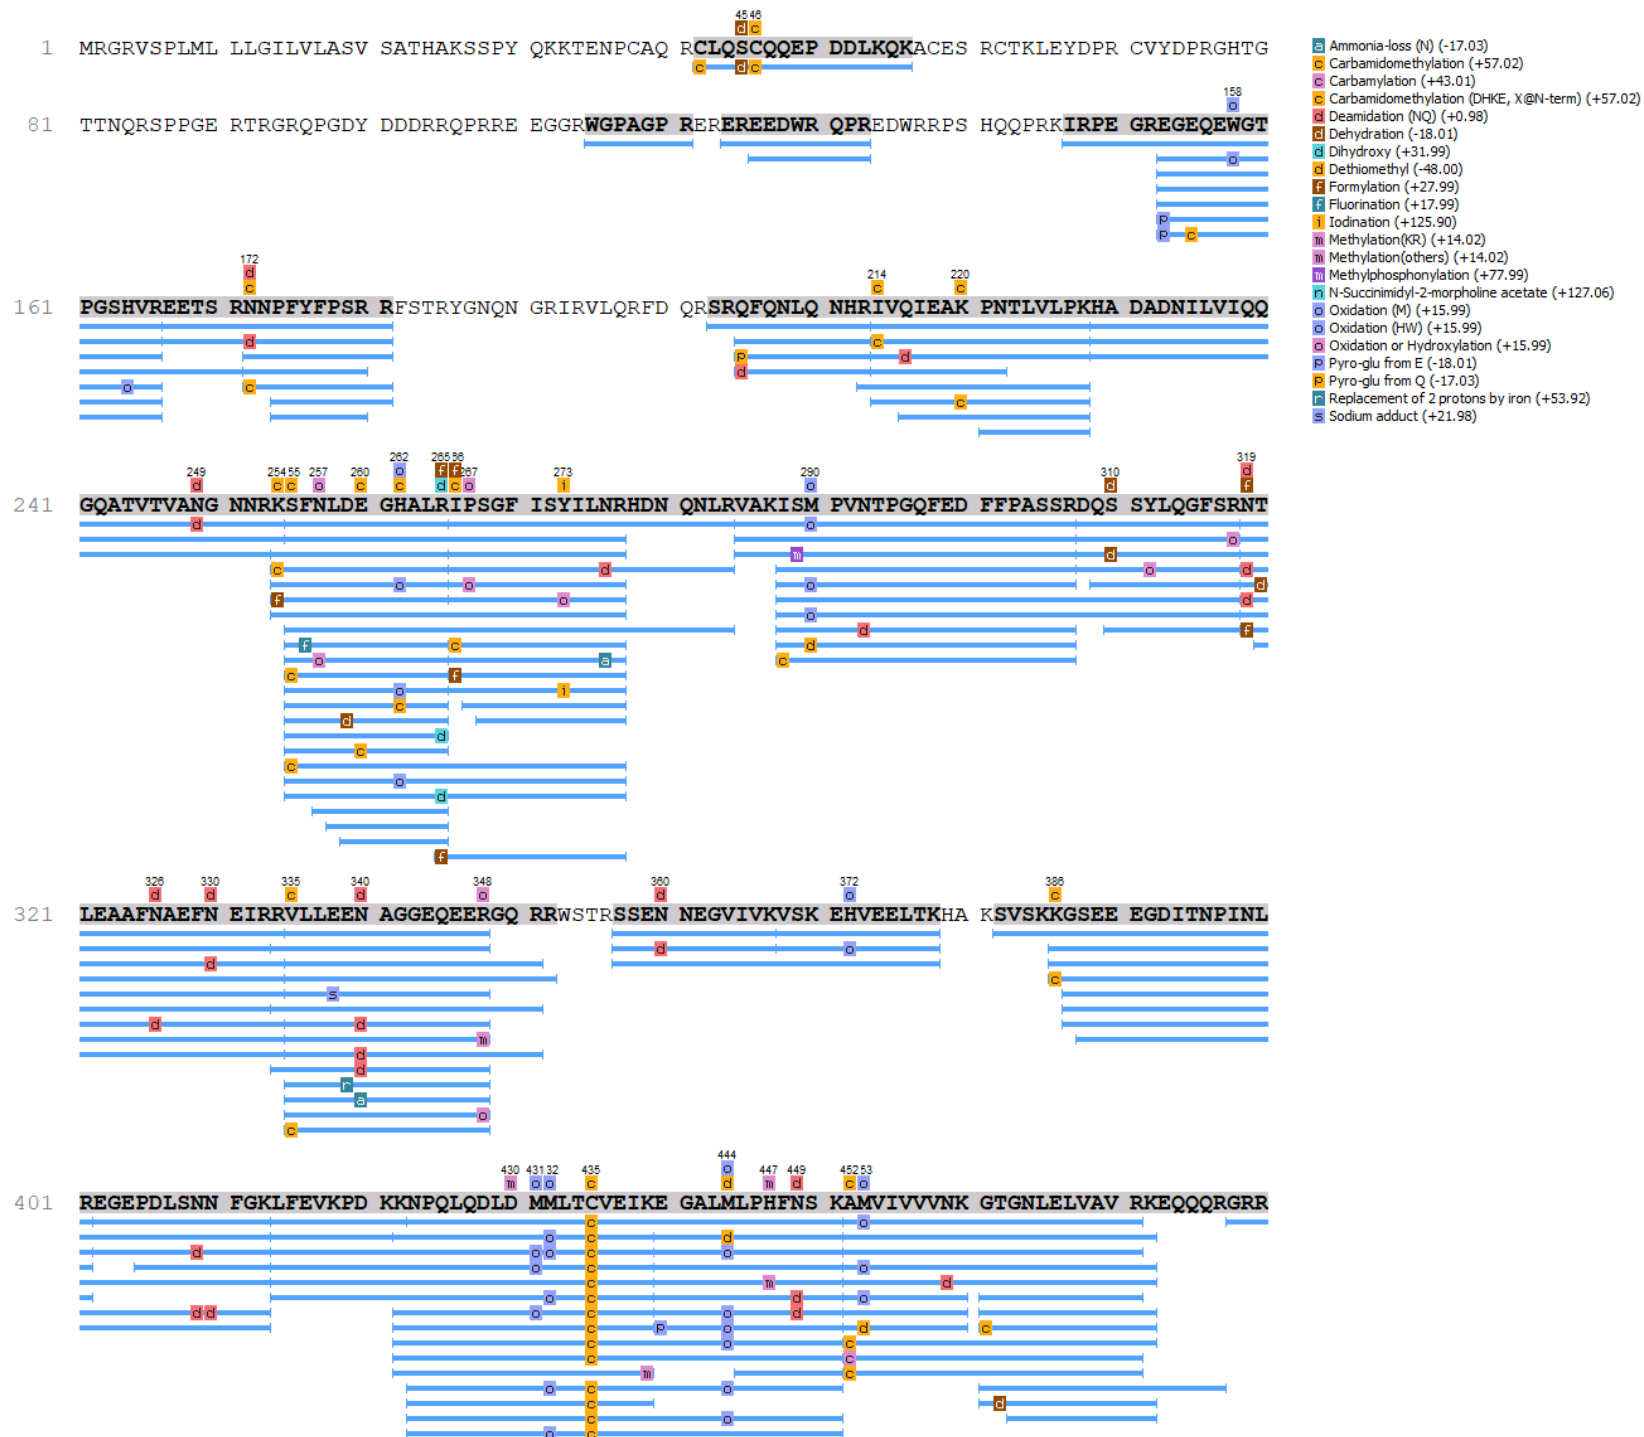



## Supporting Peptides:

| Peptide                                      | Uniq | -10lgP | Mass      | Length | ppm  | m/z       | z | RT    | Fraction | Scan     | Source File       | Area Roasted in gel | #Feature | #Feature Roasted in gel | Start | End | PTM                                 | AScore                                                                                       | Found By |
|----------------------------------------------|------|--------|-----------|--------|------|-----------|---|-------|----------|----------|-------------------|---------------------|----------|-------------------------|-------|-----|-------------------------------------|----------------------------------------------------------------------------------------------|----------|
| K.KNPQLQLDMLMTC(+57.02)VEIK.E                | N    | 136.41 | 2175.0737 | 18     | 1.4  | 1088.5457 | 2 | 35.26 | 43       | F43:1808 | OB5956 H1 Ro.raw  | 1.4906E7            | 6        | 6                       | 422   | 439 | Carbamidomethylation                | C14:Carb amidomet hylation:1 000.00                                                          | PEAKS DB |
| K.KGSEEEGGDITNPINLR                          | N    | 117.89 | 1770.8748 | 16     | 0.6  | 886.4452  | 2 | 28.91 | 43       | F43:1429 | OB5956 H1 Ro.raw  | 3.1542E7            | 8        | 8                       | 386   | 401 |                                     |                                                                                              | PEAKS DB |
| R.NTLEAAFAEAFNEIR.R                          | N    | 130.93 | 1737.8322 | 15     | 1.8  | 869.9249  | 3 | 35.34 | 38       | F38:1714 | OB5951 H3A Ro.raw | 1.332E7             | 16       | 16                      | 319   | 333 |                                     |                                                                                              | PEAKS DB |
| K.NPQLQLDMLMTC(+57.02)VEIK.E                 | N    | 128.40 | 2046.9788 | 17     | 0.2  | 1024.4968 | 2 | 37.11 | 43       | F43:1936 | OB5956 H1 Ro.raw  | 4.4643E7            | 10       | 10                      | 423   | 439 | Carbamidomethylation                | C13:Carb amidomet hylation:1 000.00                                                          | PEAKS DB |
| K.NPQLQLDM(+15.99)MLTC(+57.02)VEIK.E         | N    | 128.16 | 2062.9736 | 17     | -4.2 | 1032.4897 | 2 | 36.93 | 43       | F43:1892 | OB5956 H1 Ro.raw  | 3.3834E6            | 3        | 3                       | 423   | 439 | Oxidation (M); Carbamidomethylation | M9:Oxidat ion (M):3 0.46;C13: Carbamid omethylat ion:1000. 00                                | PEAKS DB |
| K.NPQLQLDMM(+15.99)LTC(+57.02)VEIK.E         | N    | 127.13 | 2062.9736 | 17     | 5.0  | 1032.4993 | 2 | 34.71 | 43       | F43:1780 | OB5956 H1 Ro.raw  | 1.0665E7            | 4        | 4                       | 423   | 439 | Oxidation (M); Carbamidomethylation | M10:Oxid ation (M): 30.46;C1 3:Carbami domethyla tion:1000. 00                               | PEAKS DB |
| K.ISM(+15.99)PVNTPGQFEDFFPASSR.D             | N    | 127.11 | 2242.0364 | 20     | 0.1  | 1122.0284 | 2 | 34.52 | 30       | F30:1521 | OB5926 H3B Ro.raw | 2.1708E7            | 14       | 13                      | 288   | 307 | Oxidation (M)                       | M3:Oxidat ion (M):1 000.00                                                                   | PEAKS DB |
| K.ISMPVNTPGQFEDFFPASSR.D                     | N    | 125.26 | 2226.0415 | 20     | 0.7  | 1114.0288 | 2 | 35.83 | 43       | F43:1868 | OB5956 H1 Ro.raw  | 8.8227E7            | 23       | 23                      | 288   | 307 |                                     |                                                                                              | PEAKS DB |
| K.HADADNIIQQGQATVTVAN(+.98)GNNRK.S           | N    | 123.10 | 2747.3950 | 26     | 3.3  | 916.8087  | 3 | 29.62 | 43       | F43:1472 | OB5956 H1 Ro.raw  | 4.4266E6            | 11       | 11                      | 229   | 254 | Deamidation (NQ)                    | N21:Dea midation (NQ):31.9 1                                                                 | PEAKS DB |
| K.NPQLQLDM(+15.99)M(+15.99)LTC(+57.02)VEIK.E | N    | 121.59 | 2078.9688 | 17     | 6.6  | 1040.4985 | 2 | 33.82 | 43       | F43:1726 | OB5956 H1 Ro.raw  | 6.8984E4            | 2        | 2                       | 423   | 439 | Oxidation (M); Carbamidomethylation | M9:Oxidat ion (M):1 000.00;M 10:Oxidati on (M):10 00.00;C1 3:Carbami domethyla tion:1000. 00 | PEAKS DB |
| K.SFNLDEGHALRIPSGFISYILNR.H                  | N    | 121.49 | 2618.3604 | 23     | 1.0  | 873.7949  | 3 | 37.51 | 41       | F41:1949 | OB5954 H1 Ro.raw  | 9.1637E7            | 28       | 28                      | 255   | 277 |                                     |                                                                                              | PEAKS DB |
| K.KNPQLQLDLM(+15.99)MLTC(+57.02)VEIK.E       | N    | 118.68 | 2191.0686 | 18     | 3.6  | 1096.5455 | 2 | 34.71 | 43       | F43:1781 | OB5956 H1 Ro.raw  | 1.3598E6            | 4        | 4                       | 422   | 439 | Oxidation (M); Carbamidomethylation | M10:Oxid ation (M): 27.96;C1 4:Carbami domethyla tion:1000. 00                               | PEAKS DB |
| K.KGSEEEGGDITNPINLR.E                        | N    | 117.89 | 1770.8748 | 16     | 0.6  | 886.4452  | 2 | 28.91 | 43       | F43:1429 | OB5956 H1 Ro.raw  | 3.1542E7            | 8        | 8                       | 386   | 401 |                                     |                                                                                              | PEAKS DB |
| K.AMVIVVVNKGTLNELVAVR.K                      | N    | 114.87 | 2081.2031 | 20     | -1.0 | 1041.6078 | 2 | 34.35 | 43       | F43:1758 | OB5956 H1 Ro.raw  | 3.8361E7            | 13       | 13                      | 452   | 471 |                                     |                                                                                              | PEAKS DB |
| R.IFLAGDKDNVIDQIEK.Q                         | N    | 110.41 | 1816.9570 | 16     | -1.1 | 909.4848  | 2 | 32.67 | 43       | F43:1648 | OB5956 H1 Ro.raw  | 4.2419E8            | 56       | 55                      | 541   | 556 |                                     |                                                                                              | PEAKS DB |
| total 250 peptides                           |      |        |           |        |      |           |   |       |          |          |                   |                     |          |                         |       |     |                                     |                                                                                              |          |

| Peptide                                           | Uniq | -10lgP | Mass      | Length | ppm  | m/z       | z | RT    | Fraction | Scan     | Source File       | Area Roasted in gel | #Feature | #Feature Roasted in gel | Start | End | PTM                                   | AScore                                                   | Found By  |
|---------------------------------------------------|------|--------|-----------|--------|------|-----------|---|-------|----------|----------|-------------------|---------------------|----------|-------------------------|-------|-----|---------------------------------------|----------------------------------------------------------|-----------|
| K.KNPQLQDLDMM(+15.99)LTC(+57.02)VEIK.E            | N    | 110.35 | 2191.0686 | 18     | 3.5  | 1096.5454 | 2 | 32.98 | 42       | F42:1657 | OB5955 H1 Ro.raw  | 1.6495E6            | 4        | 4                       | 422   | 439 | Oxidation (M); Carbamidomethylation   | M11:Oxidation (M):23.10;C14:Carbamidomethylation:1000.00 | PEAKS DB  |
| R.IPSGFISYILNR.H                                  | N    | 109.18 | 1378.7609 | 12     | 2.5  | 690.3894  | 2 | 36.50 | 38       | F38:1780 | OB5951 H3A Ro.raw | 4.4166E8            | 20       | 20                      | 266   | 277 |                                       |                                                          | PEAKS DB  |
| K.HADADNILVIQQGQATVTVANGNNRK.S                    | N    | 108.34 | 2746.4111 | 26     | 1.9  | 916.4794  | 3 | 29.61 | 43       | F43:1451 | OB5956 H1 Ro.raw  | 3.8404E6            | 5        | 5                       | 229   | 254 |                                       |                                                          | PEAKS DB  |
| R.VLLEENAGGEQEER.G                                | N    | 108.33 | 1571.7427 | 14     | 2.4  | 786.8805  | 2 | 26.83 | 42       | F42:1293 | OB5955 H1 Ro.raw  | 2.9858E7            | 10       | 10                      | 335   | 348 |                                       |                                                          | PEAKS DB  |
| R.KSFNLDEGHALR.I                                  | N    | 108.28 | 1385.7051 | 12     | 0.6  | 462.9092  | 3 | 26.14 | 43       | F43:1252 | OB5956 H1 Ro.raw  | 5.3666E6            | 6        | 6                       | 254   | 265 |                                       |                                                          | PEAKS DB  |
| K.GSEEEGDITNPINLR.E                               | N    | 108.06 | 1642.7798 | 15     | -0.5 | 822.3967  | 2 | 30.80 | 42       | F42:1519 | OB5955 H1 Ro.raw  | 1.1767E7            | 3        | 3                       | 387   | 401 |                                       |                                                          | PEAKS DB  |
| K.AMVIVVVKGTGNLELVAVRK.E                          | N    | 107.96 | 2209.2981 | 21     | 1.1  | 737.4408  | 3 | 33.05 | 43       | F43:1682 | OB5956 H1 Ro.raw  | 1.2362E8            | 20       | 20                      | 452   | 472 |                                       |                                                          | PEAKS DB  |
| R.I(+57.02)PSGFISYILNR.H                          | N    | 107.77 | 1435.7823 | 12     | -3.6 | 718.8959  | 2 | 36.92 | 43       | F43:1901 | OB5956 H1 Ro.raw  | 1.7559E7            | 7        | 7                       | 266   | 277 | Carbamidomethylation (DHKE, X@N-term) | I1:Carbamidomethylation (DHKE, X@N-term):1000.00         | PEAKS PTM |
| R.I(+57.02)FLAGDKDNVIDQIEK.Q                      | N    | 105.70 | 1873.9785 | 16     | 1.7  | 937.9982  | 2 | 32.48 | 43       | F43:1653 | OB5956 H1 Ro.raw  | 1.1722E7            | 5        | 5                       | 541   | 556 | Carbamidomethylation (DHKE, X@N-term) | I1:Carbamidomethylation (DHKE, X@N-term):90.91           | PEAKS PTM |
| R.DQSSYLQGFNR.N                                   | N    | 105.08 | 1286.5891 | 11     | 0.8  | 644.3024  | 2 | 30.81 | 40       | F40:1431 | OB5953 H3A Ro.raw | 9.5783E7            | 31       | 31                      | 308   | 318 |                                       |                                                          | PEAKS DB  |
| R.EGEQEWGTPGSHVR.E                                | N    | 104.71 | 1567.7015 | 14     | 2.6  | 784.8601  | 2 | 25.68 | 42       | F42:1206 | OB5955 H1 Ro.raw  | 3.4943E6            | 6        | 6                       | 153   | 166 |                                       |                                                          | PEAKS DB  |
| R.V(+57.02)LLEENAGGEQEER.G                        | N    | 103.80 | 1628.7642 | 14     | 0.3  | 815.3896  | 2 | 27.08 | 43       | F43:1322 | OB5956 H1 Ro.raw  | 4.0193E5            | 3        | 3                       | 335   | 348 | Carbamidomethylation (DHKE, X@N-term) | V1:Carbamidomethylation (DHKE, X@N-term):49.37           | PEAKS PTM |
| K.NPQLQDLDMMLTCVEIK(+14.02).E                     | N    | 103.68 | 2003.9730 | 17     | -1.2 | 1002.9926 | 2 | 38.20 | 43       | F43:1989 | OB5956 H1 Ro.raw  | 5.9168E6            | 4        | 4                       | 423   | 439 | Methylation(KR)                       | K17:Methylation(KR):1000.00                              | PEAKS PTM |
| K.SFNLDEGHALR.I                                   | N    | 103.18 | 1257.6101 | 11     | -1.7 | 629.8113  | 2 | 28.00 | 43       | F43:1362 | OB5956 H1 Ro.raw  | 1.1584E8            | 33       | 31                      | 255   | 265 |                                       |                                                          | PEAKS DB  |
| K.AM(+15.99)VIVVVKGTGNLELVAVR.K                   | N    | 103.14 | 2097.1980 | 20     | 1.6  | 700.0744  | 3 | 33.04 | 43       | F43:1684 | OB5956 H1 Ro.raw  | 2.3148E7            | 9        | 9                       | 452   | 471 | Oxidation (M)                         | M2:Oxidation (M):1000.00                                 | PEAKS DB  |
| K.DLAFPGSGEQVEK.L                                 | N    | 100.93 | 1375.6619 | 13     | -1.9 | 688.8369  | 2 | 30.34 | 43       | F43:1508 | OB5956 H1 Ro.raw  | 9.196E7             | 8        | 8                       | 560   | 572 |                                       |                                                          | PEAKS DB  |
| K.NPQLQDLDM(+15.99)MLTC(+57.02)VEIKEGALMLPHFNSK.A | N    | 100.40 | 3387.6335 | 29     | -0.6 | 1130.2178 | 3 | 37.70 | 41       | F41:1939 | OB5954 H1 Ro.raw  | 8.7706E7            | 6        | 6                       | 423   | 451 | Oxidation (M); Carbamidomethylation   | M9:Oxidation (M):26.02;C13:Carbamidomethylation:1000.00  | PEAKS DB  |
| total 250 peptides                                |      |        |           |        |      |           |   |       |          |          |                   |                     |          |                         |       |     |                                       |                                                          |           |

| Peptide                                   | Uniq | -10lgP | Mass      | Length | ppm  | m/z       | z | RT    | Fraction | Scan     | Source File            | Area Roasted in gel | #Feature | #Feature Roasted in gel | Start | End | PTM                                   | AScore                                                  | Found By  |
|-------------------------------------------|------|--------|-----------|--------|------|-----------|---|-------|----------|----------|------------------------|---------------------|----------|-------------------------|-------|-----|---------------------------------------|---------------------------------------------------------|-----------|
| R.RVLLLEENAGGEQEER.G                      | N    | 100.35 | 1727.8438 | 15     | 0.2  | 576.9553  | 3 | 25.30 | 42       | F42:1185 | OB5955<br>H1<br>Ro.raw | 8.2964E5            | 6        | 6                       | 334   | 348 |                                       |                                                         | PEAKS DB  |
| K.NPQLQLDMLMTC(+57.02)VEIKEGALMLPHFNSK.A  | N    | 98.85  | 3371.6387 | 29     | -2.7 | 843.9147  | 4 | 38.02 | 43       | F43:1969 | OB5956<br>H1<br>Ro.raw | 1.5351E8            | 12       | 12                      | 423   | 451 | Carbamidomethylation                  | C13:Carbamidomethylation:1000.00                        | PEAKS DB  |
| R.EGEPDLSNNFGK.L                          | Y    | 98.79  | 1305.5836 | 12     | -0.8 | 653.7986  | 2 | 28.17 | 43       | F43:1363 | OB5956<br>H1<br>Ro.raw | 1.5024E7            | 3        | 3                       | 402   | 413 |                                       |                                                         | PEAKS DB  |
| K.GSEEEGDITNPINLREGEPLDLSNNFGK.L          | Y    | 98.63  | 2930.3530 | 27     | -8.3 | 977.7835  | 3 | 32.31 | 43       | F43:1637 | OB5956<br>H1<br>Ro.raw | 2.5702E6            | 8        | 8                       | 387   | 413 |                                       |                                                         | PEAKS DB  |
| K.KNPQLQLDMLMTC(+57.02)VEIKEGALMLPHFNSK.A | N    | 97.96  | 3499.7336 | 30     | -3.9 | 875.9373  | 4 | 36.80 | 41       | F41:1884 | OB5954<br>H1<br>Ro.raw | 6.677E6             | 4        | 4                       | 422   | 451 | Carbamidomethylation                  | C14:Carbamidomethylation:1000.00                        | PEAKS DB  |
| R.VLLEEN(+.98)AGGEQEER.G                  | N    | 94.48  | 1572.7267 | 14     | 2.8  | 787.3728  | 2 | 27.46 | 43       | F43:1340 | OB5956<br>H1<br>Ro.raw | 6.2395E5            | 3        | 3                       | 335   | 348 | Deamidation (NQ)                      | N6:Deamidation (NQ):121.37                              | PEAKS DB  |
| R.IFLAGDKDNVIDQIEKQAK.D                   | N    | 94.35  | 2144.1477 | 19     | -2.1 | 715.7217  | 3 | 32.42 | 42       | F42:1625 | OB5955<br>H1<br>Ro.raw | 3.3984E6            | 9        | 9                       | 541   | 559 |                                       |                                                         | PEAKS DB  |
| R.KSFNLDEGHALRIPSGFISYILNR.H              | N    | 93.78  | 2746.4553 | 24     | -0.7 | 687.6206  | 4 | 36.29 | 43       | F43:1876 | OB5956<br>H1<br>Ro.raw | 1.1783E6            | 4        | 4                       | 254   | 277 |                                       |                                                         | PEAKS DB  |
| F.LAGDKDNVIDQIEK.Q                        | N    | 91.83  | 1556.8046 | 14     | -6.3 | 779.4047  | 2 | 32.21 | 43       | F43:1629 | OB5956<br>H1<br>Ro.raw | 5.4162E6            | 4        | 4                       | 543   | 556 |                                       |                                                         | PEAKS DB  |
| R.IPSGFISYILN(-17.03)R.H                  | N    | 91.80  | 1361.7343 | 12     | -4.9 | 681.8711  | 2 | 38.02 | 43       | F43:1980 | OB5956<br>H1<br>Ro.raw | 1.3387E6            | 3        | 3                       | 266   | 277 | Ammonia-loss (N)                      | N11:Ammonia-loss (N):1000.00                            | PEAKS PTM |
| K.AMVIVVVK.G                              | N    | 91.04  | 971.5837  | 9      | -0.5 | 486.7989  | 2 | 30.16 | 43       | F43:1494 | OB5956<br>H1<br>Ro.raw | 7.1361E6            | 3        | 3                       | 452   | 460 |                                       |                                                         | PEAKS DB  |
| K.SFNLDEGH(+15.99)ALR.I                   | N    | 90.73  | 1273.6051 | 11     | 0.9  | 637.8104  | 2 | 30.16 | 43       | F43:1507 | OB5956<br>H1<br>Ro.raw | 8.7681E5            | 2        | 2                       | 255   | 265 | Oxidation (HW)                        | H8:Oxidation (HW):1000.00                               | PEAKS PTM |
| R.NNPFYFPSRR.F                            | N    | 89.95  | 1296.6364 | 10     | -2.5 | 649.3239  | 2 | 28.89 | 43       | F43:1417 | OB5956<br>H1<br>Ro.raw | 1.3445E8            | 22       | 22                      | 172   | 181 |                                       |                                                         | PEAKS DB  |
| K.D(+57.02)LAFPGSGEQVEK.L                 | N    | 88.60  | 1432.6833 | 13     | -0.1 | 717.3489  | 2 | 31.08 | 41       | F41:1535 | OB5954<br>H1<br>Ro.raw | 9.7986E5            | 3        | 3                       | 560   | 572 | Carbamidomethylation (DHKE, X@N-term) | D1:Carbamidomethylation (DHKE, X@N-term):131.10         | PEAKS PTM |
| K.SFNLDEGH(+57.02)ALR.I                   | N    | 88.30  | 1314.6316 | 11     | -0.1 | 658.3230  | 2 | 28.22 | 41       | F41:1349 | OB5954<br>H1<br>Ro.raw | 2.9996E6            | 3        | 3                       | 255   | 265 | Carbamidomethylation (DHKE, X@N-term) | H8:Carbamidomethylation (DHKE, X@N-term):30.36          | PEAKS PTM |
| R.IVQIEAKPNTLVLPK.H                       | N    | 88.27  | 1662.0079 | 15     | 0.9  | 832.0120  | 2 | 30.16 | 43       | F43:1505 | OB5956<br>H1<br>Ro.raw | 2.8901E7            | 31       | 31                      | 214   | 228 |                                       |                                                         | PEAKS DB  |
| K.EGALMLPHFNSK.A                          | N    | 88.21  | 1342.6703 | 12     | 2.5  | 672.3441  | 2 | 30.67 | 43       | F43:1529 | OB5956<br>H1<br>Ro.raw | 1.4087E7            | 5        | 5                       | 440   | 451 |                                       |                                                         | PEAKS DB  |
| K.NPQLQLDMM(-48.00)LTC(+57.02)VEIK.E      | N    | 88.05  | 1998.9755 | 17     | 1.9  | 1000.4969 | 2 | 32.85 | 43       | F43:1670 | OB5956<br>H1<br>Ro.raw | 5.9032E6            | 3        | 3                       | 423   | 439 | Carbamidomethylation                  | M10:Dethiomethyl:14.02;C13:Carbamidomethylation:1000.00 | PEAKS PTM |
| R.NNPFYFPSR.R                             | N    | 86.35  | 1140.5352 | 9      | -0.1 | 571.2748  | 2 | 31.76 | 43       | F43:1593 | OB5956<br>H1<br>Ro.raw | 1.7218E7            | 11       | 11                      | 172   | 180 |                                       |                                                         | PEAKS DB  |
| total 250 peptides                        |      |        |           |        |      |           |   |       |          |          |                        |                     |          |                         |       |     |                                       |                                                         |           |

| Peptide                                            | Uniq | -10lgP | Mass      | Length | ppm  | m/z       | z | RT    | Fraction | Scan     | Source File       | Area Roasted in gel | #Feature | #Feature Roasted in gel | Start | End | PTM                                   | AScore                                                    | Found By  |
|----------------------------------------------------|------|--------|-----------|--------|------|-----------|---|-------|----------|----------|-------------------|---------------------|----------|-------------------------|-------|-----|---------------------------------------|-----------------------------------------------------------|-----------|
| K.S(+57.02)FNLDEGHALR.I                            | N    | 86.31  | 1314.6316 | 11     | -0.5 | 658.3228  | 2 | 28.11 | 42       | F42:1359 | OB5955 H1 Ro.raw  | 2.6997E6            | 4        | 4                       | 255   | 265 | Carbamidomethylation (DHKE, X@N-term) | S1:Carbamidomethylation (DHKE, X@N-term):91.04            | PEAKS PTM |
| I.PSGFISYILNR.H                                    | N    | 85.97  | 1265.6768 | 11     | -4.6 | 633.8427  | 2 | 36.75 | 43       | F43:1894 | OB5956 H1 Ro.raw  | 3.5986E5            | 2        | 2                       | 267   | 277 |                                       |                                                           | PEAKS DB  |
| R.SSENEGIVK.V                                      | Y    | 85.30  | 1174.5830 | 11     | 0.1  | 588.2988  | 2 | 23.40 | 43       | F43:1111 | OB5956 H1 Ro.raw  | 5.1333E5            | 3        | 3                       | 357   | 367 |                                       |                                                           | PEAKS DB  |
| R.IPSGFISYILNRHDNQNLNR.V                           | N    | 84.75  | 2256.1763 | 19     | 6.5  | 753.0709  | 3 | 33.61 | 43       | F43:1714 | OB5956 H1 Ro.raw  | 6.1581E7            | 21       | 21                      | 266   | 284 |                                       |                                                           | PEAKS DB  |
| R.I(+27.99)FLAGDKDNVIDQIEK.Q                       | N    | 84.60  | 1844.9519 | 16     | -2.1 | 923.4813  | 2 | 36.23 | 41       | F41:1853 | OB5954 H1 Ro.raw  | 1.9485E6            | 3        | 3                       | 541   | 556 | Formylation                           | I1:Formylation:98.75                                      | PEAKS PTM |
| R.EGEQEWGTPGSHVREETSR.N                            | N    | 83.87  | 2169.9675 | 19     | 2.2  | 724.3314  | 3 | 26.51 | 43       | F43:1287 | OB5956 H1 Ro.raw  | 5.5466E5            | 3        | 3                       | 153   | 171 |                                       |                                                           | PEAKS DB  |
| K.SFNLDEGH(+15.99)ALRIPSGFISYILNR.H                | N    | 83.49  | 2634.3555 | 23     | -4.0 | 879.1223  | 3 | 38.76 | 43       | F43:2023 | OB5956 H1 Ro.raw  | 8.8519E5            | 1        | 1                       | 255   | 277 | Oxidation (HW)                        | H8:Oxidation (HW):1000.00                                 | PEAKS PTM |
| K.KNPQLQDLDMMLTC(+57.02)VEIKEGALM(+15.99)LPHFNSK.A | N    | 83.11  | 3515.7285 | 30     | -1.9 | 879.9377  | 4 | 36.03 | 43       | F43:1857 | OB5956 H1 Ro.raw  | 6.6263E6            | 3        | 3                       | 422   | 451 | Carbamidomethylation; Oxidation (M)   | C14:Carbamidomethylation:1000.00;M23:Oxidation (M):114.34 | PEAKS DB  |
| R.NTLEAAFAEFNEIRR.V                                | N    | 82.99  | 1893.9332 | 16     | -2.6 | 947.9714  | 2 | 34.11 | 42       | F42:1711 | OB5955 H1 Ro.raw  | 3.0959E8            | 36       | 35                      | 319   | 334 |                                       |                                                           | PEAKS DB  |
| K.A(+57.02)MVIVVVNKG TGNLLELVAVR.K                 | N    | 82.14  | 2138.2246 | 20     | -5.4 | 1070.1138 | 2 | 34.47 | 42       | F42:1739 | OB5955 H1 Ro.raw  | 4.4412E6            | 3        | 3                       | 452   | 471 | Carbamidomethylation (DHKE, X@N-term) | A1:Carbamidomethylation (DHKE, X@N-term):207.56           | PEAKS PTM |
| K.DLAFFPGSGEQVEKLIK.N                              | N    | 80.89  | 1729.9249 | 16     | -1.6 | 865.9706  | 2 | 33.95 | 30       | F30:1478 | OB5926 H3B Ro.raw | 3.9305E5            | 5        | 4                       | 560   | 575 |                                       |                                                           | PEAKS DB  |
| I.FLAGDKDNVIDQIEK.Q                                | N    | 80.64  | 1703.8729 | 15     | -5.7 | 852.9388  | 2 | 32.22 | 43       | F43:1635 | OB5956 H1 Ro.raw  | 3.1343E5            | 3        | 3                       | 542   | 556 |                                       |                                                           | PEAKS DB  |
| K.EGALM(+15.99)LPHFNSK.A                           | N    | 80.48  | 1358.6653 | 12     | 1.1  | 680.3406  | 2 | 29.85 | 43       | F43:1485 | OB5956 H1 Ro.raw  | 3.0314E6            | 5        | 5                       | 440   | 451 | Oxidation (M)                         | M5:Oxidation (M):1000.00                                  | PEAKS DB  |
| K.GTGNLLELVAVR.K                                   | N    | 80.39  | 1127.6299 | 11     | -1.3 | 564.8215  | 2 | 30.21 | 41       | F41:1476 | OB5954 H1 Ro.raw  | 2.4706E7            | 5        | 5                       | 461   | 471 |                                       |                                                           | PEAKS DB  |
| R.NTLEAAFN(+.98)AEFNEIRR.V                         | N    | 79.02  | 1894.9172 | 16     | -2.2 | 948.4638  | 2 | 32.35 | 41       | F41:1616 | OB5954 H1 Ro.raw  | 1.3357E6            | 5        | 5                       | 319   | 334 | Deamidation (NQ)                      | N8:Deamidation (NQ):48.12                                 | PEAKS DB  |
| R.VLLEENAGGEQEER(+14.02).G                         | N    | 78.92  | 1585.7583 | 14     | 0.7  | 793.8870  | 2 | 27.86 | 41       | F41:1339 | OB5954 H1 Ro.raw  | 1.6341E5            | 3        | 3                       | 335   | 348 | Methylation(KR)                       | R14:Methylation(KR):1000.00                               | PEAKS PTM |
| K.GTGNLLELVAVRK.E                                  | N    | 78.87  | 1255.7249 | 12     | 0.7  | 628.8701  | 2 | 27.30 | 41       | F41:1322 | OB5954 H1 Ro.raw  | 2.29E7              | 10       | 10                      | 461   | 472 |                                       |                                                           | PEAKS DB  |
| R.QFQNLQNHR.I                                      | N    | 78.35  | 1183.5846 | 9      | 0.0  | 592.7996  | 2 | 23.81 | 42       | F42:1102 | OB5955 H1 Ro.raw  | 1.5125E5            | 6        | 6                       | 205   | 213 |                                       |                                                           | PEAKS DB  |
| K.K(+57.02)GSEEEGDITNPINLR.E                       | N    | 78.20  | 1827.8962 | 16     | -0.5 | 914.9550  | 2 | 28.83 | 42       | F42:1409 | OB5955 H1 Ro.raw  | 1.3158E5            | 2        | 2                       | 386   | 401 | Carbamidomethylation (DHKE, X@N-term) | K1:Carbamidomethylation (DHKE, X@N-term):32.46            | PEAKS PTM |
| total 250 peptides                                 |      |        |           |        |      |           |   |       |          |          |                   |                     |          |                         |       |     |                                       |                                                           |           |

| Peptide                                                     | Uniq | -10lgP | Mass      | Length | ppm  | m/z       | z | RT    | Fraction | Scan     | Source File      | Area Roasted in gel | #Feature | #Feature Roasted in gel | Start | End | PTM                                 | AScore                                                                           | Found By  |
|-------------------------------------------------------------|------|--------|-----------|--------|------|-----------|---|-------|----------|----------|------------------|---------------------|----------|-------------------------|-------|-----|-------------------------------------|----------------------------------------------------------------------------------|-----------|
| K.NPQLQDLDDMM(+15.99)LTC(+57.02)VEIKEGALMLPHFNSK.A          | N    | 78.01  | 3387.6335 | 29     | -0.8 | 1130.2175 | 3 | 36.42 | 41       | F41:1862 | OB5954 H1 Ro.raw | 6.8935E7            | 6        | 6                       | 423   | 451 | Oxidation (M); Carbamidomethylation | M10:Oxidation (M):24.44;C13:Carbamidomethylation:1000.00                         | PEAKS DB  |
| K.LFEVKPKDKNPQLQDLDDMLTLC(+57.02)VEIK.E                     | N    | 77.87  | 3131.6069 | 26     | -4.0 | 1044.8721 | 3 | 34.65 | 42       | F42:1756 | OB5955 H1 Ro.raw | 5.0788E6            | 4        | 4                       | 414   | 439 | Carbamidomethylation                | C22:Carbamidomethylation:1000.00                                                 | PEAKS DB  |
| K.NPQLQDLDM(+15.99)MLTLC(+57.02)VEIKEGALM(+15.99)LPHFNSK.A  | N    | 77.10  | 3403.6284 | 29     | 1.1  | 851.9153  | 4 | 37.51 | 41       | F41:1883 | OB5954 H1 Ro.raw | 7.3887E6            | 7        | 7                       | 423   | 451 | Oxidation (M); Carbamidomethylation | M9:Oxidation (M):27.96;C13:Carbamidomethylation:1000.00;M22:Oxidation (M):71.31  | PEAKS DB  |
| R.IFLAGDKDNVIDQIEKQ(+.98)AK.D                               | N    | 76.22  | 2145.1316 | 19     | 1.5  | 716.0522  | 3 | 33.08 | 42       | F42:1661 | OB5955 H1 Ro.raw | 0                   | 0        | 0                       | 541   | 559 | Deamidation (NQ)                    | Q17:Deamidation (NQ):48.83                                                       | PEAKS DB  |
| R.EETSRN(+.98)NPFYFPSRR.F                                   | N    | 75.62  | 1899.8864 | 15     | -0.2 | 634.3026  | 3 | 28.39 | 41       | F41:1381 | OB5954 H1 Ro.raw | 3.2976E5            | 2        | 2                       | 167   | 181 | Deamidation (NQ)                    | N6:Deamidation (NQ):33.98                                                        | PEAKS DB  |
| L.AGDKDNVIDQIEK.Q                                           | N    | 75.39  | 1443.7205 | 13     | -3.7 | 722.8649  | 2 | 32.08 | 42       | F42:1607 | OB5955 H1 Ro.raw | 3.3426E5            | 1        | 1                       | 544   | 556 |                                     |                                                                                  | PEAKS DB  |
| R.Q(-17.03)FQNLQNHR.I                                       | N    | 75.35  | 1166.5581 | 9      | -1.2 | 584.2856  | 2 | 28.00 | 43       | F43:1365 | OB5956 H1 Ro.raw | 4.927E6             | 4        | 4                       | 205   | 213 | Pyro-glu from Q                     | Q1:Pyro-glu from Q:1000.00                                                       | PEAKS PTM |
| R.VAKISMPVNTPGQFEDFFPASSR.D                                 | N    | 74.27  | 2524.2419 | 23     | -2.9 | 842.4188  | 3 | 34.29 | 42       | F42:1735 | OB5955 H1 Ro.raw | 1.4483E6            | 3        | 3                       | 285   | 307 |                                     |                                                                                  | PEAKS DB  |
| K.NPQLQDLDM(+15.99)M(+15.99)LTC(+57.02)VEIKEGALMLPHFNSK.A   | N    | 73.00  | 3403.6284 | 29     | -3.9 | 1135.5457 | 3 | 35.83 | 43       | F43:1849 | OB5956 H1 Ro.raw | 7.8068E6            | 5        | 5                       | 423   | 451 | Oxidation (M); Carbamidomethylation | M9:Oxidation (M):54.18;M10:Oxidation (M):63.99;C13:Carbamidomethylation:1000.00  | PEAKS DB  |
| K.KNPQLQDLDM(+15.99)MLTLC(+57.02)VEIKEGALM(+15.99)LPHFNSK.A | N    | 72.71  | 3531.7234 | 30     | -1.9 | 883.9364  | 4 | 35.86 | 41       | F41:1821 | OB5954 H1 Ro.raw | 7.53E5              | 1        | 1                       | 422   | 451 | Carbamidomethylation; Oxidation (M) | M10:Oxidation (M):17.01;C14:Carbamidomethylation:1000.00;M23:Oxidation (M):85.25 | PEAKS DB  |
| R.VLLEENAGGEQEERGQR.R                                       | N    | 72.44  | 1912.9238 | 17     | 0.6  | 957.4698  | 2 | 25.30 | 42       | F42:1191 | OB5955 H1 Ro.raw | 3.1353E6            | 8        | 8                       | 335   | 351 |                                     |                                                                                  | PEAKS DB  |
| K.VSKEHVEELTK.H                                             | N    | 72.42  | 1297.6877 | 11     | -0.3 | 649.8510  | 2 | 24.21 | 41       | F41:1125 | OB5954 H1 Ro.raw | 2.2246E5            | 5        | 5                       | 368   | 378 |                                     |                                                                                  | PEAKS DB  |
| K.QAKDLAFPGSGEQVEK.L                                        | N    | 72.39  | 1702.8525 | 16     | 1.2  | 568.6255  | 3 | 27.08 | 43       | F43:1321 | OB5956 H1 Ro.raw | 2.8232E5            | 6        | 6                       | 557   | 572 |                                     |                                                                                  | PEAKS DB  |
| K.EGALMLPHFN(+.98)SK.A                                      | N    | 71.37  | 1343.6543 | 12     | 2.6  | 672.8362  | 2 | 31.66 | 43       | F43:1595 | OB5956 H1 Ro.raw | 1.0101E5            | 2        | 2                       | 440   | 451 | Deamidation (NQ)                    | N10:Deamidation (NQ):1000.00                                                     | PEAKS DB  |
| F.NLDEGHALR.I                                               | N    | 70.14  | 1023.5097 | 9      | -2.5 | 512.7609  | 2 | 28.00 | 43       | F43:1370 | OB5956 H1 Ro.raw | 2.6181E6            | 3        | 3                       | 257   | 265 |                                     |                                                                                  | PEAKS DB  |
| total 250 peptides                                          |      |        |           |        |      |           |   |       |          |          |                  |                     |          |                         |       |     |                                     |                                                                                  |           |

| Peptide                                        | Uniq | -10lgP | Mass      | Length | ppm  | m/z       | z | RT    | Fraction | Scan     | Source File      | Area Roasted in gel | #Feature | #Feature Roasted in gel | Start | End | PTM                                          | AScore                                                     | Found By  |
|------------------------------------------------|------|--------|-----------|--------|------|-----------|---|-------|----------|----------|------------------|---------------------|----------|-------------------------|-------|-----|----------------------------------------------|------------------------------------------------------------|-----------|
| R.N(+.98)TLEAAFNAEFNEIRR.V                     | N    | 69.73  | 1894.9172 | 16     | 0.4  | 948.4662  | 2 | 32.39 | 42       | F42:1620 | OB5955 H1 Ro.raw | 2.6319E6            | 3        | 3                       | 319   | 334 | Deamidation (NQ)                             | N1:Deamidation (NQ):41.52                                  | PEAKS DB  |
| R.EGEPDLN(+.98)NFGK.L                          | Y    | 69.72  | 1306.5676 | 12     | -0.5 | 654.2908  | 2 | 28.90 | 43       | F43:1436 | OB5956 H1 Ro.raw | 4.1115E5            | 3        | 3                       | 402   | 413 | Deamidation (NQ)                             | N8:Deamidation (NQ):30.46                                  | PEAKS DB  |
| R.K(+57.02)SFNLDEGHALR.I                       | N    | 69.20  | 1442.7266 | 12     | -0.1 | 722.3705  | 2 | 26.25 | 42       | F42:1250 | OB5955 H1 Ro.raw | 4.0798E5            | 6        | 6                       | 254   | 265 | Carbamidomethylation (DHKE, X@N-term):76.17  | K1:Carbamidomethylation (DHKE, X@N-term):76.17             | PEAKS PTM |
| K.LFEVKPKKPNQLQDLDDMM(+15.99)LTC(+57.02)VEIK.E | N    | 69.17  | 3147.6018 | 26     | 2.2  | 787.9095  | 4 | 33.24 | 42       | F42:1670 | OB5955 H1 Ro.raw | 2.0797E6            | 2        | 2                       | 414   | 439 | Oxidation (M); Carbamidomethylation          | M19:Oxidation (M):40.00;C2:Carbamidomethylation:1000.00    | PEAKS DB  |
| K.SFNLDE(+57.02)GHALRIPSGFISYILNR.H            | N    | 69.07  | 2675.3818 | 23     | -1.9 | 892.7996  | 3 | 37.80 | 43       | F43:1964 | OB5956 H1 Ro.raw | 0                   | 0        | 0                       | 255   | 277 |                                              | E6:Carbamidomethylation (DHKE, X@N-term):0.00              | PEAKS PTM |
| R.IFLAGDKDNVID(+57.02)QIEK.Q                   | N    | 69.05  | 1873.9785 | 16     | -1.3 | 937.9953  | 2 | 32.42 | 42       | F42:1608 | OB5955 H1 Ro.raw | 8.0339E6            | 1        | 1                       | 541   | 556 |                                              | D12:Carbamidomethylation (DHKE, X@N-term):15.85            | PEAKS PTM |
| R.EGEQEWGTGPSH(+15.99)VR.E                     | N    | 68.71  | 1583.6964 | 14     | 0.8  | 792.8561  | 2 | 27.64 | 43       | F43:1358 | OB5956 H1 Ro.raw | 1.1836E5            | 4        | 4                       | 153   | 166 | Oxidation (HW)                               | H12:Oxidation (HW):95.51                                   | PEAKS PTM |
| A.GDKDNVIDQIEK.Q                               | N    | 68.14  | 1372.6833 | 12     | -7.0 | 687.3441  | 2 | 32.22 | 43       | F43:1632 | OB5956 H1 Ro.raw | 1.1241E6            | 3        | 3                       | 545   | 556 |                                              |                                                            | PEAKS DB  |
| R.I(+57.02)VQIEAKPNTLVLPK.H                    | N    | 68.01  | 1719.0294 | 15     | -3.7 | 860.5188  | 2 | 30.87 | 43       | F43:1547 | OB5956 H1 Ro.raw | 7.3731E5            | 5        | 4                       | 214   | 228 | Carbamidomethylation (DHKE, X@N-term):109.97 | I1:Carbamidomethylation (DHKE, X@N-term):109.97            | PEAKS PTM |
| R.RVLLEEN(+.98)AGGEQEER.G                      | N    | 67.83  | 1728.8278 | 15     | -0.8 | 577.2827  | 3 | 25.96 | 42       | F42:1233 | OB5955 H1 Ro.raw | 1.359E4             | 2        | 2                       | 334   | 348 | Deamidation (NQ)                             | N7:Deamidation (NQ):77.53                                  | PEAKS DB  |
| R.DQS(-18.01)SYLQGFNR.N                        | N    | 67.70  | 1268.5785 | 11     | 0.2  | 635.2966  | 2 | 30.91 | 41       | F41:1537 | OB5954 H1 Ro.raw | 6.4401E5            | 3        | 3                       | 308   | 318 | Dehydration                                  | S3:Dehydration:40.00                                       | PEAKS PTM |
| R.RVLLEENAGGEQEERQGR.R                         | N    | 67.67  | 2069.0249 | 18     | 1.9  | 690.6835  | 3 | 25.60 | 41       | F41:1205 | OB5954 H1 Ro.raw | 1.8247E6            | 3        | 3                       | 334   | 351 |                                              |                                                            | PEAKS DB  |
| K.Q(-17.03)AKDLAFPGSGEQVEK.L                   | N    | 67.52  | 1685.8260 | 16     | 0.1  | 843.9204  | 2 | 29.98 | 43       | F43:1503 | OB5956 H1 Ro.raw | 9.9003E4            | 3        | 3                       | 557   | 572 | Pyro-glu from Q                              | Q1:Pyro-glu from Q:1000.00                                 | PEAKS PTM |
| K.NPQLQ(+.98)DLDDMLTLC(+57.02)VEIK.E           | N    | 67.25  | 2047.9629 | 17     | 1.5  | 1024.9902 | 2 | 44.46 | 43       | F43:2348 | OB5956 H1 Ro.raw | 0                   | 0        | 0                       | 423   | 439 | Carbamidomethylation                         | Q5:Deamidation (NQ):19.68;C13:Carbamidomethylation:1000.00 | PEAKS DB  |
| R.WGPAGPR.E                                    | N    | 66.93  | 739.3765  | 7      | 1.0  | 370.6959  | 2 | 25.22 | 41       | F41:1191 | OB5954 H1 Ro.raw | 3.1676E5            | 3        | 3                       | 115   | 121 |                                              |                                                            | PEAKS DB  |
| K.SFNL(-18.01)EGHALR.I                         | N    | 66.88  | 1239.5996 | 11     | 2.9  | 620.8089  | 2 | 28.79 | 41       | F41:1400 | OB5954 H1 Ro.raw | 0                   | 0        | 0                       | 255   | 265 | Dehydration                                  | D5:Dehydration:49.79                                       | PEAKS PTM |
| K.AM(+15.99)VIVVVNK.G                          | N    | 66.42  | 987.5787  | 9      | 1.1  | 494.7972  | 2 | 27.11 | 41       | F41:1283 | OB5954 H1 Ro.raw | 1.8879E6            | 3        | 3                       | 452   | 460 | Oxidation (M)                                | M2:Oxidation (M):1000.00                                   | PEAKS DB  |
| total 250 peptides                             |      |        |           |        |      |           |   |       |          |          |                  |                     |          |                         |       |     |                                              |                                                            |           |

| Peptide                                           | Uniq | -10lgP | Mass      | Length | ppm  | m/z       | z | RT    | Fraction | Scan     | Source File       | Area Roasted in gel | #Feature | #Feature Roasted in gel | Start | End | PTM                                   | AScore                                                   | Found By  |
|---------------------------------------------------|------|--------|-----------|--------|------|-----------|---|-------|----------|----------|-------------------|---------------------|----------|-------------------------|-------|-----|---------------------------------------|----------------------------------------------------------|-----------|
| K.KNPQLQDLDMMLTCVEIK(+14.02).E                    | N    | 66.06  | 2132.0679 | 18     | -0.6 | 1067.0405 | 2 | 36.31 | 41       | F41:1858 | OB5954 H1 Ro.raw  | 5.2356E5            | 2        | 2                       | 422   | 439 | Methylation(KR)                       | K18:Methylation(KR):130.57                               | PEAKS PTM |
| R.EETSRNPNPFYFSPRR.F                              | N    | 65.61  | 1898.9023 | 15     | 1.8  | 633.9759  | 3 | 27.75 | 42       | F42:1339 | OB5955 H1 Ro.raw  | 8.693E5             | 4        | 4                       | 167   | 181 |                                       |                                                          | PEAKS DB  |
| K.NPQLQDLDMMLTC(+57.02)VEIKEGALM(+15.99)LPHFNSK.A | N    | 64.76  | 3387.6335 | 29     | -0.6 | 847.9152  | 4 | 37.63 | 43       | F43:1915 | OB5956 H1 Ro.raw  | 8.7706E7            | 6        | 6                       | 423   | 451 | Carbamidomethylation; Oxidation (M)   | C13:Carbamidomethylation:1000.00;M22:Oxidation (M):82.05 | PEAKS DB  |
| R.IPSGFISY(+125.90)ILNR.H                         | N    | 64.64  | 1504.6575 | 12     | -1.9 | 753.3346  | 2 | 38.39 | 43       | F43:2001 | OB5956 H1 Ro.raw  | 2.0334E5            | 2        | 2                       | 266   | 277 | Iodination                            | Y8:Iodination:1000.00                                    | PEAKS PTM |
| R.IPSGFISYILN(+.98)RHDNQNL.R.V                    | N    | 64.64  | 2257.1604 | 19     | 4.7  | 753.3976  | 3 | 34.29 | 42       | F42:1740 | OB5955 H1 Ro.raw  | 6.9901E5            | 2        | 2                       | 266   | 284 | Deamidation (NQ)                      | N11:Deamidation (NQ):36.24                               | PEAKS DB  |
| A.FPGSGEQVEK.L                                    | N    | 64.10  | 1076.5138 | 10     | -3.4 | 539.2623  | 2 | 30.29 | 42       | F42:1495 | OB5955 H1 Ro.raw  | 4.0412E5            | 3        | 3                       | 563   | 572 |                                       |                                                          | PEAKS DB  |
| R.SRQFQNLQNH.R.I                                  | N    | 63.98  | 1426.7178 | 11     | 0.3  | 476.5800  | 3 | 24.16 | 43       | F43:1148 | OB5956 H1 Ro.raw  | 5.7314E4            | 3        | 3                       | 203   | 213 |                                       |                                                          | PEAKS DB  |
| K.ISMPVNTPGQFEDFFPASSRDQSSYLQGFSR.N               | N    | 63.85  | 3494.6201 | 31     | -0.9 | 1165.8796 | 3 | 36.01 | 43       | F43:1851 | OB5956 H1 Ro.raw  | 5.8723E6            | 6        | 6                       | 288   | 318 |                                       |                                                          | PEAKS DB  |
| K.LFEVKPKDK.N                                     | N    | 63.79  | 1102.6385 | 9      | 0.6  | 552.3269  | 2 | 24.50 | 43       | F43:1159 | OB5956 H1 Ro.raw  | 1.1348E6            | 6        | 6                       | 414   | 422 |                                       |                                                          | PEAKS DB  |
| R.SSEN(+.98)NEGVIVK.V                             | Y    | 63.52  | 1175.5670 | 11     | 0.2  | 588.7909  | 2 | 24.46 | 41       | F41:1140 | OB5954 H1 Ro.raw  | 5.8916E4            | 4        | 4                       | 357   | 367 | Deamidation (NQ)                      | N4:Deamidation (NQ):33.98                                | PEAKS DB  |
| Q.SSYLQGFSR.N                                     | N    | 63.16  | 1043.5035 | 9      | 1.4  | 522.7598  | 2 | 29.29 | 41       | F41:1438 | OB5954 H1 Ro.raw  | 6.2708E4            | 3        | 3                       | 310   | 318 |                                       |                                                          | PEAKS DB  |
| R.QFQNLQN(+.98)HR.I                               | N    | 63.09  | 1184.5686 | 9      | 5.4  | 593.2948  | 2 | 23.60 | 43       | F43:1114 | OB5956 H1 Ro.raw  | 8.0412E2            | 1        | 1                       | 205   | 213 |                                       | N7:Deamidation (NQ):0.00                                 | PEAKS DB  |
| K.EGALMLPH(+14.02)FNSK.A                          | N    | 63.06  | 1356.6860 | 12     | -4.2 | 679.3475  | 2 | 30.85 | 43       | F43:1554 | OB5956 H1 Ro.raw  | 2.9707E5            | 3        | 3                       | 440   | 451 | Methylation(others)                   | H8:Methylation(others):65.81                             | PEAKS PTM |
| P.SGFISYILNR.H                                    | N    | 63.04  | 1168.6240 | 10     | 1.5  | 585.3202  | 2 | 35.08 | 43       | F43:1803 | OB5956 H1 Ro.raw  | 2.9962E5            | 1        | 1                       | 268   | 277 |                                       |                                                          | PEAKS DB  |
| N.LDEGHALR.I                                      | N    | 62.84  | 909.4668  | 8      | 0.0  | 455.7407  | 2 | 27.93 | 42       | F42:1350 | OB5955 H1 Ro.raw  | 1.8672E5            | 3        | 3                       | 258   | 265 |                                       |                                                          | PEAKS DB  |
| G.SEEEGDITNPINLREGEPDLSNNFGK.L                    | Y    | 62.76  | 2873.3315 | 26     | -0.4 | 958.7865  | 3 | 32.44 | 30       | F30:1400 | OB5926 H3B Ro.raw | 1.9904E4            | 1        | 1                       | 388   | 413 |                                       |                                                          | PEAKS DB  |
| K.A(+57.02)MVIVVVNKG TGNLELVAVRK.E                | N    | 62.52  | 2266.3196 | 21     | 0.7  | 1134.1678 | 2 | 32.98 | 42       | F42:1660 | OB5955 H1 Ro.raw  | 1.5099E7            | 6        | 6                       | 452   | 472 | Carbamidomethylation (DHKE, X@N-term) | A1:Carbamidomethylation (DHKE, X@N-term):139.69          | PEAKS PTM |
| K.HADADNILVIQQGQATVTVANGN(+.98)NRK.S              | N    | 62.31  | 2747.3950 | 26     | -0.1 | 916.8055  | 3 | 30.70 | 41       | F41:1517 | OB5954 H1 Ro.raw  | 8.5956E3            | 1        | 1                       | 229   | 254 |                                       | N23:Deamidation (NQ):9.40                                | PEAKS DB  |
| K.SFN(+15.99)LDEGHALR.I                           | N    | 62.00  | 1273.6051 | 11     | 0.0  | 637.8098  | 2 | 27.46 | 43       | F43:1330 | OB5956 H1 Ro.raw  | 9.622E5             | 3        | 3                       | 255   | 265 | Oxidation or Hydroxylation            | N3:Oxidation or Hydroxylation:55.92                      | PEAKS PTM |
| R.IP(+15.99)SGFISYILNR.H                          | N    | 61.98  | 1394.7557 | 12     | -0.8 | 698.3846  | 2 | 37.47 | 43       | F43:1932 | OB5956 H1 Ro.raw  | 3.2208E6            | 4        | 4                       | 266   | 277 | Oxidation or Hydroxylation            | P2:Oxidation or Hydroxylation:39.25                      | PEAKS PTM |
| total 250 peptides                                |      |        |           |        |      |           |   |       |          |          |                   |                     |          |                         |       |     |                                       |                                                          |           |

| Peptide                                                           | Uniq | -10lgP | Mass      | Length | ppm  | m/z      | z | RT    | Fraction | Scan     | Source File       | Area Roasted in gel | #Feature | #Feature Roasted in gel | Start | End | PTM                                     | AScore                                                                                                        | Found By  |
|-------------------------------------------------------------------|------|--------|-----------|--------|------|----------|---|-------|----------|----------|-------------------|---------------------|----------|-------------------------|-------|-----|-----------------------------------------|---------------------------------------------------------------------------------------------------------------|-----------|
| K.NPQLQDLDM(+15.99)LTC(+57.02)VEIKEGALM(+15.99)LPHFNSK.A          | N    | 61.19  | 3403.6284 | 29     | 0.3  | 851.9147 | 4 | 35.86 | 41       | F41:1801 | OB5954 H1 Ro.raw  | 3.4294E6            | 4        | 4                       | 423   | 451 | Oxidation (M); Carbamidomethylation     | M10:Oxidation (M):21.94;C13:Carbamidomethylation:1000.00;M22:Oxidation (M):61.50                              | PEAKS DB  |
| K.G(+57.02)TGNLELVAVRK.E                                          | N    | 60.73  | 1312.7462 | 12     | -0.4 | 657.3801 | 2 | 27.30 | 41       | F41:1303 | OB5954 H1 Ro.raw  | 3.6978E5            | 2        | 2                       | 461   | 472 | Carbamidomethylation (DHKE, X@N-term):5 | G1:Carbamidomethylation (DHKE, X@N-term):5                                                                    | PEAKS PTM |
| K.NPQLQDLDM(+15.99)M(+15.99)LTC(+57.02)VEIKEGALM(+15.99)LPHFNSK.A | N    | 60.17  | 3419.6233 | 29     | -0.9 | 855.9124 | 4 | 34.83 | 42       | F42:1766 | OB5955 H1 Ro.raw  | 1.2322E6            | 3        | 3                       | 423   | 451 | Oxidation (M); Carbamidomethylation     | M9:Oxidation (M):1000.00;M10:Oxidation (M):1000.00;C13:Carbamidomethylation:1000.00;M22:Oxidation (M):1000.00 | PEAKS DB  |
| R.IPSGFISY(+15.99)ILNR.H                                          | N    | 60.13  | 1394.7557 | 12     | -0.7 | 698.3846 | 2 | 35.11 | 41       | F41:1859 | OB5954 H1 Ro.raw  | 3.4529E6            | 5        | 5                       | 266   | 277 | Oxidation or Hydroxylation              | Y8:Oxidation or Hydroxylation:67.76                                                                           | PEAKS PTM |
| L.DEGHALR.I                                                       | N    | 59.61  | 796.3828  | 7      | 2.5  | 399.1996 | 2 | 27.93 | 42       | F42:1351 | OB5955 H1 Ro.raw  | 9.3538E4            | 3        | 3                       | 259   | 265 |                                         |                                                                                                               | PEAKS DB  |
| K.LFEVKPDKKNPQLQ(+.98)DLDM(+15.99)LTC(+57.02)VEIK.E               | N    | 59.38  | 3148.5857 | 26     | 7.4  | 788.1595 | 4 | 33.17 | 42       | F42:1670 | OB5955 H1 Ro.raw  | 3.9804E5            | 1        | 1                       | 414   | 439 | Oxidation (M); Carbamidomethylation     | Q14:Deamidation (NQ):0.00;M19:Oxidation (M):23.10;C22:Carbamidomethylation:1000.00                            | PEAKS DB  |
| R.VLLEEN(-17.03)AGGEQEER.G                                        | N    | 59.22  | 1554.7162 | 14     | 1.2  | 778.3663 | 2 | 27.73 | 42       | F42:1335 | OB5955 H1 Ro.raw  | 0                   | 0        | 0                       | 335   | 348 | Ammonia-loss (N)                        | N6:Ammonia-loss (N):1000.00                                                                                   | PEAKS PTM |
| K.SFNLDEGHALRIPSGFISYILNRHDNQNL.R.V                               | N    | 59.07  | 3495.7759 | 30     | 1.5  | 700.1635 | 5 | 39.97 | 40       | F40:1987 | OB5953 H3A Ro.raw | 2.0405E7            | 15       | 15                      | 255   | 284 |                                         |                                                                                                               | PEAKS DB  |
| K.GSE(+57.02)EEGDITNPINLR.E                                       | N    | 58.95  | 1699.8013 | 15     | -3.0 | 850.9054 | 2 | 30.85 | 43       | F43:1556 | OB5956 H1 Ro.raw  | 4.2816E4            | 1        | 1                       | 387   | 401 |                                         | E3:Carbamidomethylation (DHKE, X@N-term):0.00                                                                 | PEAKS PTM |
| K.SFNLDEGHALR(+31.99)IPSGFISYILNR.H                               | N    | 58.88  | 2650.3503 | 23     | 0.1  | 884.4575 | 3 | 39.14 | 42       | F42:2021 | OB5955 H1 Ro.raw  | 5.6519E5            | 1        | 1                       | 255   | 277 | Dihydroxy                               | R11:Dihydroxy:46.57                                                                                           | PEAKS PTM |
| K.LFEVKPDK.K                                                      | N    | 58.71  | 974.5436  | 8      | 1.7  | 488.2799 | 2 | 25.30 | 42       | F42:1183 | OB5955 H1 Ro.raw  | 1.7315E6            | 6        | 6                       | 414   | 421 |                                         |                                                                                                               | PEAKS DB  |
| K.SFNLDE(+57.02)GHALR.I                                           | N    | 58.62  | 1314.6316 | 11     | 0.3  | 658.3232 | 2 | 27.83 | 43       | F43:1458 | OB5956 H1 Ro.raw  | 2.3371E6            | 2        | 2                       | 255   | 265 | Carbamidomethylation (DHKE, X@N-term):2 | E6:Carbamidomethylation (DHKE, X@N-term):2                                                                    | PEAKS PTM |
| R.N(+57.02)NPFFPSRR.F                                             | N    | 58.56  | 1353.6577 | 10     | 1.1  | 677.8369 | 2 | 29.74 | 42       | F42:1453 | OB5955 H1 Ro.raw  | 9.24E5              | 3        | 3                       | 172   | 181 | Carbamidomethylation (DHKE, X@N-term)   | N1:Carbamidomethylation (DHKE, X@N-term)                                                                      | PEAKS PTM |
| total 250 peptides                                                |      |        |           |        |      |          |   |       |          |          |                   |                     |          |                         |       |     |                                         |                                                                                                               |           |



| Peptide                                       | Uniq | -10lgP | Mass      | Length | ppm  | m/z       | z | RT    | Fraction | Scan     | Source File       | Area Roasted in gel | #Feature | #Feature Roasted in gel | Start | End | PTM                                                    | AScore                                                                    | Found By  |
|-----------------------------------------------|------|--------|-----------|--------|------|-----------|---|-------|----------|----------|-------------------|---------------------|----------|-------------------------|-------|-----|--------------------------------------------------------|---------------------------------------------------------------------------|-----------|
|                                               |      |        |           |        |      |           |   |       |          |          |                   |                     |          |                         |       |     |                                                        | -term):1000.00                                                            |           |
| R.E(-18.01)GE(+57.02)QEWGTPGSHVR.E            | N    | 58.23  | 1606.7124 | 14     | 0.2  | 804.3636  | 2 | 27.56 | 42       | F42:1323 | OB5955 H1 Ro.raw  | 2.2302E5            | 3        | 3                       | 153   | 166 | Pyro-glu from E; Carbamidomethylation (DHKE, X@N-term) | E1:Pyro-glu from E:1000.00;E3:Carbamidomethylation (DHKE, X@N-term):60.92 | PEAKS PTM |
| R.IFLAGDKDNVIDQ(+.98)IEKQAK.D                 | N    | 58.20  | 2145.1316 | 19     | 1.4  | 716.0521  | 3 | 33.04 | 43       | F43:1686 | OB5956 H1 Ro.raw  | 1.2153E5            | 1        | 1                       | 541   | 559 | Deamidation (NQ)                                       | Q13:Deamidation (NQ):25.18                                                | PEAKS DB  |
| R.VAKISM(+15.99)PVNTPGQFEDFFPASSR.D           | N    | 57.67  | 2540.2368 | 23     | 2.1  | 847.7546  | 3 | 32.98 | 42       | F42:1665 | OB5955 H1 Ro.raw  | 1.5427E5            | 1        | 1                       | 285   | 307 | Oxidation (M)                                          | M6:Oxidation (M):1000.00                                                  | PEAKS DB  |
| K.G(+57.02)TGNLLEVAVR.K                       | N    | 57.51  | 1184.6514 | 11     | -2.7 | 593.3314  | 2 | 30.10 | 42       | F42:1486 | OB5955 H1 Ro.raw  | 1.7196E5            | 2        | 2                       | 461   | 471 |                                                        | G1:Carbamidomethylation (DHKE, X@N-term):19.78                            | PEAKS PTM |
| R.IFLAGD(+57.02)KDNVIDQIEK.Q                  | N    | 57.43  | 1873.9785 | 16     | 1.7  | 625.6678  | 3 | 32.52 | 41       | F41:1637 | OB5954 H1 Ro.raw  | 2.7943E5            | 3        | 3                       | 541   | 556 |                                                        | D6:Carbamidomethylation (DHKE, X@N-term):15.57                            | PEAKS PTM |
| R.IFLAGDK(+15.99)DNVIDQIEK.Q                  | N    | 57.39  | 1832.9519 | 16     | -1.9 | 917.4814  | 2 | 31.99 | 41       | F41:1600 | OB5954 H1 Ro.raw  | 7.5922E5            | 2        | 2                       | 541   | 556 |                                                        | K7:Oxidation or Hydroxylation:17.01                                       | PEAKS PTM |
| N.PFYFPSRR.F                                  | N    | 57.34  | 1068.5504 | 8      | 1.1  | 535.2831  | 2 | 28.95 | 41       | F41:1414 | OB5954 H1 Ro.raw  | 4.6082E6            | 5        | 5                       | 174   | 181 |                                                        |                                                                           | PEAKS DB  |
| R.K(+27.99)SFNLDEGHALR.I                      | N    | 57.29  | 1413.7001 | 12     | 1.4  | 707.8583  | 2 | 28.46 | 42       | F42:1387 | OB5955 H1 Ro.raw  | 2.9777E4            | 1        | 1                       | 254   | 265 | Formylation                                            | K1:Formylation:1000.00                                                    | PEAKS PTM |
| K.SVSKKGSEEEGDITNPINLR.E                      | N    | 57.26  | 2172.1023 | 20     | 0.9  | 725.0420  | 3 | 27.48 | 41       | F41:1325 | OB5954 H1 Ro.raw  | 1.6504E5            | 2        | 2                       | 382   | 401 |                                                        |                                                                           | PEAKS DB  |
| K.LFEVKPKKPNQLQDLDM(+15.99)MLTC(+57.02)VEIK.E | N    | 57.09  | 3147.6018 | 26     | -1.9 | 787.9062  | 4 | 34.20 | 41       | F41:1734 | OB5954 H1 Ro.raw  | 2.4894E6            | 4        | 4                       | 414   | 439 | Oxidation (M); Carbamidomethylation                    | M18:Oxidation (M):33.98;C22:Carbamidomethylation:1000.00                  | PEAKS DB  |
| K.IRPEGREGSEQEWGTPGSHVR.E                     | N    | 56.62  | 2276.1045 | 20     | 0.5  | 570.0337  | 4 | 27.56 | 42       | F42:1329 | OB5955 H1 Ro.raw  | 8.9716E4            | 2        | 2                       | 147   | 166 |                                                        |                                                                           | PEAKS DB  |
| K.SFNLDEGHALR(+31.99).I                       | N    | 55.96  | 1289.6000 | 11     | -1.4 | 645.8063  | 2 | 30.41 | 43       | F43:1520 | OB5956 H1 Ro.raw  | 0                   | 0        | 0                       | 255   | 265 | Dihydroxy                                              | R11:Dihydroxy:119.59                                                      | PEAKS PTM |
| K.ISMPVN(+.98)TPGQFEDFFPASSR.D                | N    | 55.55  | 2227.0254 | 20     | 6.6  | 1114.5273 | 2 | 36.77 | 41       | F41:1885 | OB5954 H1 Ro.raw  | 1.01E5              | 2        | 2                       | 288   | 307 | Deamidation (NQ)                                       | N6:Deamidation (NQ):42.68                                                 | PEAKS DB  |
| R.NTLEAAFAEFN(+.98)EIRR.V                     | N    | 54.77  | 1894.9172 | 16     | 1.8  | 948.4676  | 2 | 33.04 | 43       | F43:1685 | OB5956 H1 Ro.raw  | 2.2573E6            | 5        | 5                       | 319   | 334 | Deamidation (NQ)                                       | N12:Deamidation (NQ):39.02                                                | PEAKS DB  |
| K.S(+57.02)FNLDEGHALRIPSGFISYILNR.H           | N    | 54.19  | 2675.3818 | 23     | 2.3  | 892.8033  | 3 | 39.35 | 38       | F38:1901 | OB5951 H3A Ro.raw | 6.7035E5            | 1        | 1                       | 255   | 277 | Carbamidomethylation (DHKE, X@N-term)                  | S1:Carbamidomethylation (DHKE, X@N-term):63.97                            | PEAKS PTM |
| R.IFLAGDKDNVIDQIEK(+57.02)QAK.D               | N    | 54.07  | 2201.1692 | 19     | 0.3  | 734.7306  | 3 | 32.48 | 43       | F43:1657 | OB5956 H1 Ro.raw  | 1.2122E6            | 3        | 3                       | 541   | 559 |                                                        | K16:Carbamidomethylation (DHKE, X                                         | PEAKS PTM |
| total 250 peptides                            |      |        |           |        |      |           |   |       |          |          |                   |                     |          |                         |       |     |                                                        |                                                                           |           |

| Peptide                                                | Uniq | -10lgP | Mass      | Length | ppm  | m/z       | z | RT    | Fraction | Scan     | Source File       | Area Roasted in gel | #Feature | #Feature Roasted in gel | Start | End | PTM                                   | AScore                                                                                | Found By  |
|--------------------------------------------------------|------|--------|-----------|--------|------|-----------|---|-------|----------|----------|-------------------|---------------------|----------|-------------------------|-------|-----|---------------------------------------|---------------------------------------------------------------------------------------|-----------|
|                                                        |      |        |           |        |      |           |   |       |          |          |                   |                     |          |                         |       |     |                                       | @N-term):11.12                                                                        |           |
| R.I(+27.99)PSGFIYILNR.H                                | N    | 53.77  | 1406.7557 | 12     | 0.7  | 704.3856  | 2 | 42.27 | 42       | F42:2199 | OB5955 H1 Ro.raw  | 0                   | 0        | 0                       | 266   | 277 | Formylation                           | I1:Formylation:100.0.00                                                               | PEAKS PTM |
| R.IPSGFIYILNRHDN(+.98)QNLR.V                           | N    | 53.60  | 2257.1604 | 19     | -0.7 | 753.3936  | 3 | 34.26 | 41       | F41:1732 | OB5954 H1 Ro.raw  | 0                   | 0        | 0                       | 266   | 284 |                                       | N15:Deamidation (NQ):0.00                                                             | PEAKS DB  |
| K.HADADNILVIQQGQATVTVANGNNR.K                          | N    | 53.13  | 2618.3162 | 25     | 0.5  | 873.7798  | 3 | 30.34 | 38       | F38:1426 | OB5951 H3A Ro.raw | 1.8654E3            | 1        | 1                       | 229   | 253 |                                       |                                                                                       | PEAKS DB  |
| R.IVQIEAK(+57.02)PNTLVLPK.H                            | N    | 53.06  | 1719.0294 | 15     | -1.6 | 860.5206  | 2 | 30.29 | 43       | F43:1512 | OB5956 H1 Ro.raw  | 2.587E5             | 1        | 1                       | 214   | 228 | Carbamidomethylation (DHKE, X@N-term) | K7:Carbamidomethylation (D HKE, X@N-term):25.69                                       | PEAKS PTM |
| K.AM(+15.99)VIVVVNKG TGNLELVAVRK.E                     | N    | 52.95  | 2225.2930 | 21     | -1.3 | 742.7706  | 3 | 32.42 | 42       | F42:1596 | OB5955 H1 Ro.raw  | 1.4247E6            | 3        | 3                       | 452   | 472 | Oxidation (M)                         | M2:Oxidation (M):1000.00                                                              | PEAKS DB  |
| R.IVQIEAKPN.T                                          | N    | 52.62  | 1010.5760 | 9      | -0.3 | 506.2951  | 2 | 25.40 | 42       | F42:1199 | OB5955 H1 Ro.raw  | 0                   | 0        | 0                       | 214   | 222 |                                       |                                                                                       | PEAKS DB  |
| K.KNPQLQ(+.98)DLDMMLTC(+57.02)VEIKEGALMLPHFSK.A        | N    | 51.97  | 3500.7175 | 30     | 3.4  | 876.1896  | 4 | 36.93 | 43       | F43:1903 | OB5956 H1 Ro.raw  | 9.2646E6            | 2        | 2                       | 422   | 451 | Carbamidomethylation                  | Q6:Deamidation (NQ):14.04; C14:Carbamidomethylation:1000.00                           | PEAKS DB  |
| R.E(-18.01)GEQEWGTPGSHVR.E                             | N    | 51.90  | 1549.6909 | 14     | 0.7  | 775.8533  | 2 | 27.75 | 42       | F42:1342 | OB5955 H1 Ro.raw  | 3.4987E5            | 3        | 3                       | 153   | 166 | Pyro-glu from E                       | E1:Pyro-glu from E:1000.00                                                            | PEAKS PTM |
| R.IFLAGDKDNVID.Q                                       | N    | 51.22  | 1318.6769 | 12     | -0.9 | 660.3451  | 2 | 31.76 | 43       | F43:1606 | OB5956 H1 Ro.raw  | 1.1173E5            | 3        | 3                       | 541   | 552 |                                       |                                                                                       | PEAKS DB  |
| K.ISM(+15.99)PVNTPGQFEDFFPASSRDQSSYLQGFSR.N            | N    | 50.25  | 3510.6150 | 31     | 0.3  | 1171.2126 | 3 | 35.35 | 36       | F36:1707 | OB5948 H3B Ro.raw | 2.4799E6            | 5        | 5                       | 288   | 318 | Oxidation (M)                         | M3:Oxidation (M):1000.00                                                              | PEAKS DB  |
| K.NPQLQLDMM(+15.99)LTC(+57.02)VEIKEGALMLPHFN(+.98)SK.A | N    | 49.99  | 3388.6174 | 29     | 6.1  | 848.1668  | 4 | 36.39 | 43       | F43:1880 | OB5956 H1 Ro.raw  | 1.7975E6            | 1        | 1                       | 423   | 451 | Oxidation (M); Carbamidomethylation   | M10:Oxidation (M):27.96; C13:Carbamidomethylation:1000.00; N27:Deamidation (NQ):18.27 | PEAKS DB  |
| R.N(-17.03)NPFYFPSRR.F                                 | N    | 49.99  | 1279.6097 | 10     | 1.1  | 427.5443  | 3 | 28.89 | 43       | F43:1434 | OB5956 H1 Ro.raw  | 5.674E5             | 3        | 3                       | 172   | 181 |                                       | N1:Ammونيا-loss (N):9.34                                                              | PEAKS PTM |
| T.GNLELVAVRK.E                                         | N    | 49.53  | 1097.6556 | 10     | 0.5  | 549.8354  | 2 | 27.00 | 42       | F42:1296 | OB5955 H1 Ro.raw  | 3.4872E5            | 3        | 3                       | 463   | 472 |                                       |                                                                                       | PEAKS DB  |
| R.VAKIS(+77.99)MPVNTPGQFEDFFPASSR.D                    | N    | 49.16  | 2602.2290 | 23     | 3.0  | 1302.1257 | 2 | 38.06 | 42       | F42:1958 | OB5955 H1 Ro.raw  | 0                   | 0        | 0                       | 285   | 307 | Methylphosphorylation                 | S5:Methylphosphorylation:56.99                                                        | PEAKS PTM |
| F.PGSGEQVEK.L                                          | N    | 49.06  | 929.4454  | 9      | -3.7 | 465.7282  | 2 | 30.34 | 43       | F43:1524 | OB5956 H1 Ro.raw  | 5.2705E4            | 1        | 1                       | 564   | 572 |                                       |                                                                                       | PEAKS DB  |
| K.AMVIVVVNK(+57.02)GTGNLELVAVRK.E                      | N    | 48.92  | 2266.3196 | 21     | 1.3  | 756.4481  | 3 | 33.23 | 43       | F43:1673 | OB5956 H1 Ro.raw  | 3.1193E6            | 1        | 1                       | 452   | 472 |                                       | K9:Carbamidomethylation (D HKE, X@N-term):8.78                                        | PEAKS PTM |
| R.EEDWRQPR.E                                           | N    | 48.87  | 1114.5155 | 8      | 1.8  | 558.2661  | 2 | 23.91 | 41       | F41:1112 | OB5954 H1 Ro.raw  | 1.6791E3            | 1        | 1                       | 126   | 133 |                                       |                                                                                       | PEAKS DB  |
| total 250 peptides                                     |      |        |           |        |      |           |   |       |          |          |                   |                     |          |                         |       |     |                                       |                                                                                       |           |

| Peptide                                                   | Uniq | -10lgP | Mass      | Length | ppm  | m/z       | z | RT    | Fraction | Scan     | Source File       | Area Roasted in gel | #Feature | #Feature Roasted in gel | Start | End | PTM                                       | AScore                                                                          | Found By  |
|-----------------------------------------------------------|------|--------|-----------|--------|------|-----------|---|-------|----------|----------|-------------------|---------------------|----------|-------------------------|-------|-----|-------------------------------------------|---------------------------------------------------------------------------------|-----------|
| K.PNTLVLPK.H                                              | N    | 48.84  | 880.5382  | 8      | -2.9 | 441.2751  | 2 | 28.00 | 43       | F43:1374 | OB5956 H1 Ro.raw  | 1.9234E5            | 2        | 2                       | 221   | 228 |                                           |                                                                                 | PEAKS DB  |
| L.R(+27.99)IPSGFISYILNR.H                                 | N    | 48.25  | 1562.8568 | 13     | -2.0 | 782.4341  | 2 | 37.84 | 43       | F43:1976 | OB5956 H1 Ro.raw  | 1.5108E5            | 1        | 1                       | 265   | 277 | Formylation                               | R1:Formylation:100.0.00                                                         | PEAKS PTM |
| R.EGEQEW(+15.99)GTPGSHVR.E                                | N    | 47.73  | 1583.6964 | 14     | -0.6 | 792.8550  | 2 | 25.22 | 41       | F41:1196 | OB5954 H1 Ro.raw  | 2.0714E4            | 1        | 1                       | 153   | 166 | Oxidation (HW)                            | W6:Oxidation (HW):72.73                                                         | PEAKS PTM |
| V.QIEAKPNTLVLPK.H                                         | N    | 47.49  | 1449.8555 | 13     | -3.8 | 725.9323  | 2 | 30.34 | 43       | F43:1513 | OB5956 H1 Ro.raw  | 4.7367E4            | 1        | 1                       | 216   | 228 |                                           |                                                                                 | PEAKS DB  |
| K.GSEEEGDITNPINLREGEPLSN(+.98)N(+.98)FGK.L                | Y    | 47.23  | 2932.3210 | 27     | 4.0  | 978.4515  | 3 | 32.30 | 43       | F43:1637 | OB5956 H1 Ro.raw  | 3.6476E5            | 1        | 1                       | 387   | 413 | Deamidation (NQ)                          | N23:Deamidation (NQ):55.39;N24:Deamidation (NQ):48.34                           | PEAKS DB  |
| R.N(+.98)TLEAAFNAEFNEIR.R                                 | N    | 46.63  | 1738.8162 | 15     | 9.2  | 870.4233  | 2 | 44.36 | 42       | F42:2303 | OB5955 H1 Ro.raw  | 5.4416E3            | 1        | 1                       | 319   | 333 | Deamidation (NQ)                          | N1:Deamidation (NQ):39.47                                                       | PEAKS DB  |
| R.VLLE(+21.98)ENAGGEQEER.G                                | N    | 46.37  | 1593.7246 | 14     | -1.1 | 797.8687  | 2 | 26.71 | 43       | F43:1300 | OB5956 H1 Ro.raw  | 4.0134E5            | 3        | 3                       | 335   | 348 | Sodium adduct                             | E4:Sodium adduct:40.00                                                          | PEAKS PTM |
| N.PFYFPSR.R                                               | N    | 46.32  | 912.4493  | 7      | -0.1 | 457.2319  | 2 | 31.70 | 42       | F42:1584 | OB5955 H1 Ro.raw  | 2.4653E5            | 4        | 4                       | 174   | 180 |                                           |                                                                                 | PEAKS DB  |
| K.GTGNLELVAVRKEQQQR.G                                     | N    | 46.31  | 1925.0442 | 17     | 1.4  | 642.6896  | 3 | 26.67 | 43       | F43:1294 | OB5956 H1 Ro.raw  | 2.1018E4            | 1        | 1                       | 461   | 477 |                                           |                                                                                 | PEAKS DB  |
| K.NPQLQLD(+14.02)MMLTC(+57.02)VEIK.E                      | N    | 45.99  | 2060.9944 | 17     | 0.2  | 1031.5046 | 2 | 37.33 | 41       | F41:1934 | OB5954 H1 Ro.raw  | 2.7407E4            | 1        | 1                       | 423   | 439 | Methylation(others); Carbamidomethylation | D8:Methylation(others):42.68; C13:Carbamidomethylation:1000.00                  | PEAKS PTM |
| K.VSKEH(+15.99)VEELTK.H                                   | N    | 45.89  | 1313.6826 | 11     | 0.8  | 657.8491  | 2 | 24.35 | 43       | F43:1164 | OB5956 H1 Ro.raw  | 1.7904E4            | 3        | 3                       | 368   | 378 | Oxidation (HW)                            | H5:Oxidation (HW):1000.00                                                       | PEAKS PTM |
| R.SSENEGIVKVSKEHVEELTK.H                                  | Y    | 45.89  | 2454.2603 | 22     | 1.5  | 819.0952  | 3 | 30.81 | 39       | F39:1445 | OB5952 H3A Ro.raw | 1.1749E4            | 1        | 1                       | 357   | 378 |                                           |                                                                                 | PEAKS DB  |
| K.GTGNLE(+57.02)LVAVRK.E                                  | N    | 45.75  | 1312.7462 | 12     | -0.8 | 657.3799  | 2 | 27.17 | 42       | F42:1295 | OB5955 H1 Ro.raw  | 1.9882E5            | 1        | 1                       | 461   | 472 |                                           | E6:Carbamidomethylation (DHKE, X@N-term):0.00                                   | PEAKS PTM |
| K.A(+43.01)MVIVVVKGTGNLELVAVR.K                           | N    | 45.64  | 2124.2090 | 20     | 0.7  | 1063.1125 | 2 | 33.65 | 41       | F41:1688 | OB5954 H1 Ro.raw  | 8.0739E4            | 1        | 1                       | 452   | 471 | Carbamylation                             | A1:Carbamylation:161.20                                                         | PEAKS PTM |
| R.VLLEEN(+.98)AGGEQEERGQR.R                               | N    | 45.60  | 1913.9078 | 17     | -1.6 | 638.9755  | 3 | 25.99 | 41       | F41:1234 | OB5954 H1 Ro.raw  | 0                   | 0        | 0                       | 335   | 351 | Deamidation (NQ)                          | N6:Deamidation (NQ):28.79                                                       | PEAKS DB  |
| K.KNPQLQLDMM(+15.99)LTC(+57.02)VEIKEGALM(+15.99)LPHFNSK.A | N    | 45.45  | 3531.7234 | 30     | -1.1 | 883.9372  | 4 | 35.80 | 42       | F42:1822 | OB5955 H1 Ro.raw  | 0                   | 0        | 0                       | 422   | 451 | Carbamidomethylation; Oxidation (M)       | M11:Oxidation (M):0.00;C14:Carbamidomethylation:1000.00;M23:Oxidation (M):45.87 | PEAKS DB  |
| K.LFEVKPKKNPQLQLDLM(+15.99)M(+15.99)LTC(+57.02)VEIK.E     | N    | 45.43  | 3163.5967 | 26     | -2.8 | 791.9042  | 4 | 32.90 | 41       | F41:1650 | OB5954 H1 Ro.raw  | 2.0535E6            | 3        | 3                       | 414   | 439 | Oxidation (M); Carbamidomethylation       | M18:Oxidation (M):1000.00; M19:Oxidation (M):1000.00; C22:Carb                  | PEAKS DB  |
| total 250 peptides                                        |      |        |           |        |      |           |   |       |          |          |                   |                     |          |                         |       |     |                                           |                                                                                 |           |

| Peptide                                                         | Uniq | -10lgP | Mass      | Length | ppm  | m/z       | z | RT    | Fraction | Scan     | Source File      | Area Roasted in gel | #Feature | #Feature Roasted in gel | Start | End | PTM                                                   | AScore                                                                                                     | Found By  |
|-----------------------------------------------------------------|------|--------|-----------|--------|------|-----------|---|-------|----------|----------|------------------|---------------------|----------|-------------------------|-------|-----|-------------------------------------------------------|------------------------------------------------------------------------------------------------------------|-----------|
|                                                                 |      |        |           |        |      |           |   |       |          |          |                  |                     |          |                         |       |     |                                                       | amidomethylation:1000.00                                                                                   |           |
| R.KSFNLDEGH(+15.99)ALR.I                                        | N    | 45.40  | 1401.7001 | 12     | 3.9  | 701.8600  | 2 | 27.64 | 43       | F43:1349 | OB5956 H1 Ro.raw | 6.6479E4            | 2        | 2                       | 254   | 265 | Oxidation (HW)                                        | H9:Oxidation (HW):1000.00                                                                                  | PEAKS PTM |
| K.KNPQLQDLDM(+15.99)MLTC(+57.02)VEIKEGALMLPHFNSK.A              | N    | 44.60  | 3515.7285 | 30     | -1.9 | 879.9377  | 4 | 35.30 | 41       | F41:1798 | OB5954 H1 Ro.raw | 6.4162E5            | 1        | 1                       | 422   | 451 | Carbamidomethylation                                  | M10:Oxidation (M):14.02;C14:Carbamidomethylation:1000.00                                                   | PEAKS DB  |
| R.DQSSYLQGFSSR(+15.99).N                                        | N    | 44.15  | 1302.5840 | 11     | 2.5  | 652.3009  | 2 | 30.79 | 43       | F43:1544 | OB5956 H1 Ro.raw | 1.4308E5            | 3        | 3                       | 308   | 318 | Oxidation or Hydroxylation                            | R11:Oxidation or Hydroxylation:42.88                                                                       | PEAKS PTM |
| R.Q(+.98)FQNLQNHR.I                                             | N    | 43.70  | 1184.5686 | 9      | 4.6  | 593.2943  | 2 | 23.68 | 42       | F42:1098 | OB5955 H1 Ro.raw | 0                   | 0        | 0                       | 205   | 213 | Deamidation (NQ)                                      | Q1:Deamidation (NQ):39.25                                                                                  | PEAKS DB  |
| K.I(+57.02)SMPVNTPGQFEDFFPASSR.D                                | N    | 42.37  | 2283.0630 | 20     | -0.7 | 1142.5380 | 2 | 36.01 | 43       | F43:1860 | OB5956 H1 Ro.raw | 1.8515E5            | 1        | 1                       | 288   | 307 | Carbamidomethylation (DHKE, X@N-term)                 | I1:Carbamidomethylation (DHKE, X@N-term):50.99                                                             | PEAKS PTM |
| K.ISM(-48.00)PVNTPGQFEDFFPASSR.D                                | N    | 42.09  | 2178.0381 | 20     | 2.8  | 727.0220  | 3 | 32.48 | 43       | F43:1652 | OB5956 H1 Ro.raw | 5.8583E6            | 3        | 3                       | 288   | 307 | Dethiomethyl                                          | M3:Dethiomethyl:1000.00                                                                                    | PEAKS PTM |
| K.NPQLQDLDMM(+15.99)LTC(+57.02)VEIKEGALM(+15.99)LPHFN(+.98)SK.A | N    | 41.25  | 3404.6125 | 29     | -0.4 | 1135.8777 | 3 | 36.69 | 42       | F42:1878 | OB5955 H1 Ro.raw | 3.8423E5            | 1        | 1                       | 423   | 451 | Carbamidomethylation; Oxidation (M); Deamidation (NQ) | M10:Oxidation (M):0.00;C13:Carbamidomethylation:1000.00;M22:Oxidation (M):39.23;N27:Deamidation (NQ):69.52 | PEAKS DB  |
| K.DLAFF(+15.99)GSGEQVEK.L                                       | N    | 41.14  | 1391.6569 | 13     | 0.5  | 696.8361  | 2 | 29.36 | 42       | F42:1432 | OB5955 H1 Ro.raw | 7.4528E5            | 3        | 3                       | 560   | 572 | Oxidation or Hydroxylation                            | P5:Oxidation or Hydroxylation:67.76                                                                        | PEAKS PTM |
| K.AMVIVVVN(+.98)KGTGNLVLAVRK.E                                  | N    | 41.03  | 2210.2820 | 21     | 1.9  | 1106.1504 | 2 | 34.35 | 42       | F42:1720 | OB5955 H1 Ro.raw | 4.5718E5            | 1        | 1                       | 452   | 472 | Deamidation (NQ)                                      | N8:Deamidation (NQ):28.79                                                                                  | PEAKS DB  |
| K.EGALM(-48.00)LPHFNSK.A                                        | N    | 40.53  | 1294.6670 | 12     | 0.5  | 432.5632  | 3 | 28.76 | 41       | F41:1389 | OB5954 H1 Ro.raw | 2.208E6             | 2        | 2                       | 440   | 451 | Dethiomethyl                                          | M5:Dethiomethyl:1000.00                                                                                    | PEAKS PTM |
| R.IVQ(+.98)IEAKPNTLVLPK.H                                       | N    | 40.35  | 1662.9919 | 15     | 8.1  | 832.5100  | 2 | 30.29 | 42       | F42:1514 | OB5955 H1 Ro.raw | 3.5627E6            | 1        | 1                       | 214   | 228 | Deamidation (NQ)                                      | Q3:Deamidation (NQ):22.65                                                                                  | PEAKS DB  |
| R.VLLEENAGGEQEERGQRR.W                                          | N    | 40.17  | 2069.0249 | 18     | 1.0  | 518.2640  | 4 | 25.49 | 42       | F42:1205 | OB5955 H1 Ro.raw | 2.0305E5            | 2        | 2                       | 335   | 352 |                                                       |                                                                                                            | PEAKS DB  |
| R.VLLEENAGGEQEER(+15.99).G                                      | N    | 39.98  | 1587.7375 | 14     | 1.8  | 794.8775  | 2 | 26.70 | 41       | F41:1275 | OB5954 H1 Ro.raw | 0                   | 0        | 0                       | 335   | 348 | Oxidation or Hydroxylation                            | R14:Oxidation or Hydroxylation:20.88                                                                       | PEAKS PTM |
| R.N(+27.99)TLEAAFNAAFNEIRR.V                                    | N    | 39.68  | 1921.9282 | 16     | -1.7 | 961.9697  | 2 | 37.51 | 41       | F41:1908 | OB5954 H1 Ro.raw | 3.7767E4            | 1        | 1                       | 319   | 334 | Formylation                                           | N1:Formylation:1000.00                                                                                     | PEAKS PTM |
| K.E(-18.01)GALM(+15.99)LPHFNSK.A                                | N    | 39.64  | 1340.6547 | 12     | 0.2  | 447.8923  | 3 | 30.21 | 41       | F41:1479 | OB5954 H1 Ro.raw | 7.81E5              | 1        | 1                       | 440   | 451 | Pyro-glu from E; Oxidation (M)                        | E1:Pyro-glu from E:1000.00; M5:Oxidation (M):1000.00                                                       | PEAKS PTM |
| total 250 peptides                                              |      |        |           |        |      |           |   |       |          |          |                  |                     |          |                         |       |     |                                                       |                                                                                                            |           |

| Peptide                                                          | Uniq | -10lgP | Mass      | Length | ppm  | m/z       | z | RT    | Fraction | Scan     | Source File       | Area Roasted in gel | #Feature | #Feature Roasted in gel | Start | End | PTM                                    | AScore                                                                                                     | Found By  |
|------------------------------------------------------------------|------|--------|-----------|--------|------|-----------|---|-------|----------|----------|-------------------|---------------------|----------|-------------------------|-------|-----|----------------------------------------|------------------------------------------------------------------------------------------------------------|-----------|
| R.VLLEE(+53.92)NAGGEQEER.G                                       | N    | 39.58  | 1625.6620 | 14     | -1.0 | 542.8940  | 3 | 26.76 | 42       | F42:1278 | OB5955 H1 Ro.raw  | 0                   | 0        | 0                       | 335   | 348 | Replacement of 2 protons by iron       | E5:Replacement of 2 protons by iron:20.92                                                                  | PEAKS PTM |
| K.HADADNILVIQQGQ(+.98)ATVTVANGNNRK.S                             | N    | 39.33  | 2747.3950 | 26     | 2.6  | 916.8103  | 3 | 30.46 | 30       | F30:1280 | OB5926 H3B Ro.raw | 0                   | 0        | 0                       | 229   | 254 |                                        | Q14:Deamidation (NQ):5.07                                                                                  | PEAKS DB  |
| K.NPQLQ(+.98)DLDDMM(+15.99)LTC(+57.02)VEIKEGALM(+15.99)LPHFNSK.A | N    | 39.15  | 3404.6125 | 29     | -1.8 | 852.1589  | 4 | 38.22 | 43       | F43:1993 | OB5956 H1 Ro.raw  | 7.6266E5            | 1        | 1                       | 423   | 451 | Deamidation (NQ); Carbamidomethylation | Q5:Deamidation (NQ):49.79; M10:Oxidation (M):0.00;C13:Carbamidomethylation:1000.00;M22:Oxidation (M):14.60 | PEAKS DB  |
| K.N(+.98)PQLQDLDM(+15.99)MLTC(+57.02)VEIKEGALMLPHFNSK.A          | N    | 38.83  | 3388.6174 | 29     | 8.2  | 1695.3300 | 2 | 37.72 | 41       | F41:1941 | OB5954 H1 Ro.raw  | 6.4698E5            | 1        | 1                       | 423   | 451 | Carbamidomethylation                   | N1:Deamidation (NQ):0.00;M9:Oxidation (M):0.00;C13:Carbamidomethylation:1000.00                            | PEAKS DB  |
| K.D(+15.99)LAFPGSGEQVEK.L                                        | N    | 38.81  | 1391.6569 | 13     | 0.5  | 696.8361  | 2 | 29.36 | 42       | F42:1368 | OB5955 H1 Ro.raw  | 2.5725E5            | 1        | 1                       | 560   | 572 | Oxidation or Hydroxylation             | D1:Oxidation or Hydroxylation:77.13                                                                        | PEAKS PTM |
| K.NPQ(+.98)LQDLDDMLTC(+57.02)VEIK.E                              | N    | 38.70  | 2047.9629 | 17     | 2.9  | 1024.9917 | 2 | 46.45 | 41       | F41:2441 | OB5954 H1 Ro.raw  | 0                   | 0        | 0                       | 423   | 439 | Carbamidomethylation                   | Q3:Deamidation (NQ):14.04; C13:Carbamidomethylation:1000.00                                                | PEAKS DB  |
| R.IFLAGD(+15.99)KDNVIDQIEK.Q                                     | N    | 38.52  | 1832.9519 | 16     | 1.9  | 917.4850  | 2 | 31.89 | 42       | F42:1590 | OB5955 H1 Ro.raw  | 4.6198E5            | 1        | 1                       | 541   | 556 |                                        | D6:Oxidation or Hydroxylation:12.60                                                                        | PEAKS PTM |
| R.IFLAGDKDN(+.98)VIDQIEKQ(+.98)AK.D                              | N    | 37.85  | 2146.1157 | 19     | 9.8  | 716.3862  | 3 | 32.98 | 42       | F42:1661 | OB5955 H1 Ro.raw  | 8.6625E4            | 1        | 1                       | 541   | 559 |                                        | N9:Deamidation (NQ):13.83; Q17:Deamidation (NQ):17.65                                                      | PEAKS DB  |
| K.DLAFPGSGE(+53.92)QVEK.L                                        | N    | 37.31  | 1429.5812 | 13     | -6.3 | 715.7933  | 2 | 30.34 | 43       | F43:1518 | OB5956 H1 Ro.raw  | 2.6492E5            | 1        | 1                       | 560   | 572 | Replacement of 2 protons by iron       | E9:Replacement of 2 protons by iron:37.54                                                                  | PEAKS PTM |
| K.GT(-18.01)GNLELVAVRK.E                                         | N    | 36.73  | 1237.7142 | 12     | 2.6  | 413.5797  | 3 | 27.00 | 42       | F42:1287 | OB5955 H1 Ro.raw  | 4.7714E5            | 1        | 1                       | 461   | 472 | Dehydration                            | T2:Dehydration:1000.00                                                                                     | PEAKS PTM |
| R.NT(-18.01)LEAAFAEFNEIRR.V                                      | N    | 36.45  | 1875.9227 | 16     | 0.7  | 626.3153  | 3 | 34.16 | 43       | F43:1739 | OB5956 H1 Ro.raw  | 6.9172E6            | 2        | 2                       | 319   | 334 | Dehydration                            | T2:Dehydration:1000.00                                                                                     | PEAKS PTM |
| K.EGALM(+15.99)LPHFN(+.98)SK.A                                   | N    | 36.41  | 1359.6493 | 12     | 2.8  | 680.8338  | 2 | 31.22 | 41       | F41:1550 | OB5954 H1 Ro.raw  | 0                   | 0        | 0                       | 440   | 451 | Oxidation (M); Deamidation (NQ)        | M5:Oxidation (M):1000.00;N10:Deamidation (NQ):1000.00                                                      | PEAKS DB  |
| R.GRREEEEDDEEEEGSNR.E                                            | Y    | 36.40  | 2192.8689 | 18     | 0.0  | 731.9636  | 3 | 23.90 | 41       | F41:1110 | OB5954 H1 Ro.raw  | 1.2738E4            | 2        | 2                       | 478   | 495 |                                        |                                                                                                            | PEAKS DB  |
| total 250 peptides                                               |      |        |           |        |      |           |   |       |          |          |                   |                     |          |                         |       |     |                                        |                                                                                                            |           |

| Peptide                                                 | Uniq | -10lgP | Mass      | Length | ppm  | m/z      | z | RT    | Fraction | Scan     | Source File      | Area Roasted in gel | #Feature | #Feature Roasted in gel | Start | End | PTM                               | AScore                                                                                                        | Found By  |
|---------------------------------------------------------|------|--------|-----------|--------|------|----------|---|-------|----------|----------|------------------|---------------------|----------|-------------------------|-------|-----|-----------------------------------|---------------------------------------------------------------------------------------------------------------|-----------|
| R.DQSSY(-18.01)LQGFSR.N                                 | N    | 36.32  | 1268.5785 | 11     | -0.6 | 635.2961 | 2 | 30.85 | 43       | F43:1579 | OB5956 H1 Ro.raw | 2.378E5             | 1        | 1                       | 308   | 318 |                                   | Y5:Dehydration:0.00                                                                                           | PEAKS PTM |
| R.C(+57.02)LQS(-18.01)C(+57.02)Q(+.98)QEPDDLKQK.A       | N    | 36.24  | 1858.8190 | 15     | -0.1 | 930.4167 | 2 | 28.47 | 31       | F31:1350 | OB5942 H6 Ro.raw | 0                   | 0        | 0                       | 42    | 56  | Carbamidomethylation; Dehydration | C1:Carbamidomethylation:1000.00;S4:Dehydration:39.55;C5:Carbamidomethylation:1000.00;Q6:Deamidation (NQ):8.69 | PEAKS PTM |
| M.LPHFNSK.A                                             | N    | 36.02  | 841.4446  | 7      | 1.3  | 421.7301 | 2 | 30.63 | 42       | F42:1510 | OB5955 H1 Ro.raw | 1.4673E6            | 2        | 2                       | 445   | 451 |                                   |                                                                                                               | PEAKS DB  |
| E.PDLSNNFGK.L                                           | Y    | 35.93  | 990.4771  | 9      | -1.0 | 496.2453 | 2 | 28.09 | 42       | F42:1365 | OB5955 H1 Ro.raw | 3.4068E4            | 1        | 1                       | 405   | 413 |                                   |                                                                                                               | PEAKS DB  |
| K.NPQLQLDM(-48.00)MLTC(+57.02)VEIK.E                    | N    | 35.81  | 1998.9755 | 17     | 6.7  | 667.3369 | 3 | 34.52 | 43       | F43:1773 | OB5956 H1 Ro.raw | 8.4276E5            | 1        | 1                       | 423   | 439 | Carbamidomethylation              | M9:Dethiomethyl:11.06;C13:Carbamidomethylation:1000.00                                                        | PEAKS PTM |
| K.SF(+17.99)NLDEGHALR.I                                 | N    | 34.75  | 1275.6007 | 11     | 8.1  | 638.8128 | 2 | 26.62 | 42       | F42:1267 | OB5955 H1 Ro.raw | 9.5828E3            | 1        | 1                       | 255   | 265 | Fluorination                      | F2:Fluorination:1000.00                                                                                       | PEAKS PTM |
| K.KNPQLQ(+.98)DLDM(+15.99)LTC(+57.02)VEIKEGALMLPHFNSK.A | N    | 33.72  | 3516.7124 | 30     | 3.3  | 880.1883 | 4 | 35.48 | 41       | F41:1798 | OB5954 H1 Ro.raw | 7.5658E5            | 1        | 1                       | 422   | 451 | Carbamidomethylation              | Q6:Deamidation (NQ):18.55;M11:Oxidation (M):14.02;C14:Carbamidomethylation:1000.00                            | PEAKS DB  |
| D.QSSYLQGFNSR.N                                         | N    | 33.26  | 1171.5621 | 10     | 2.1  | 586.7896 | 2 | 29.36 | 42       | F42:1431 | OB5955 H1 Ro.raw | 3.3134E4            | 1        | 1                       | 309   | 318 |                                   |                                                                                                               | PEAKS DB  |
| R.IVQIEAKP(+15.99)NTLVLPK.H                             | N    | 33.15  | 1678.0028 | 15     | -0.7 | 840.0081 | 2 | 30.35 | 41       | F41:1495 | OB5954 H1 Ro.raw | 0                   | 0        | 0                       | 214   | 228 |                                   | P8:Oxidation or Hydroxylation:9.34                                                                            | PEAKS PTM |
| R.IFLAGDKDNVID(-18.01)QIEK.Q                            | N    | 33.09  | 1798.9464 | 16     | 0.7  | 900.4811 | 2 | 31.39 | 43       | F43:1591 | OB5956 H1 Ro.raw | 6.7846E4            | 1        | 1                       | 541   | 556 |                                   | D12:Dehydration:13.16                                                                                         | PEAKS PTM |
| R.EREEDWRQPR.E                                          | N    | 32.92  | 1399.6592 | 10     | 5.7  | 700.8409 | 2 | 24.05 | 43       | F43:1141 | OB5956 H1 Ro.raw | 4.1173E4            | 1        | 1                       | 124   | 133 |                                   |                                                                                                               | PEAKS DB  |
| D.NVIDQIEK.Q                                            | N    | 32.64  | 957.5131  | 8      | 1.6  | 479.7646 | 2 | 28.19 | 42       | F42:1367 | OB5955 H1 Ro.raw | 3.0062E3            | 1        | 1                       | 549   | 556 |                                   |                                                                                                               | PEAKS DB  |
| K.AM(-48.00)VIVVVNK.G                                   | N    | 32.49  | 923.5804  | 9      | 0.0  | 462.7975 | 2 | 25.00 | 43       | F43:1192 | OB5956 H1 Ro.raw | 6.3177E3            | 1        | 1                       | 452   | 460 | Dethiomethyl                      | M2:Dethiomethyl:1000.00                                                                                       | PEAKS PTM |
| R.D(-18.01)QSSYLQGFNSR.N                                | N    | 31.95  | 1268.5785 | 11     | 1.6  | 635.2975 | 2 | 29.92 | 43       | F43:1489 | OB5956 H1 Ro.raw | 0                   | 0        | 0                       | 308   | 318 |                                   | D1:Dehydration:0.00                                                                                           | PEAKS PTM |
| R.IFLAGDKD(-18.01)NVIDQIEK.Q                            | N    | 31.82  | 1798.9464 | 16     | -0.9 | 600.6555 | 3 | 32.15 | 43       | F43:1589 | OB5956 H1 Ro.raw | 3.5634E5            | 1        | 1                       | 541   | 556 | Dehydration                       | D8:Dehydration:30.83                                                                                          | PEAKS PTM |
| K.D(+53.92)LAFIGSGEQVEK.L                               | N    | 31.27  | 1429.5812 | 13     | -4.3 | 715.7948 | 2 | 30.56 | 41       | F41:1500 | OB5954 H1 Ro.raw | 3.7719E5            | 1        | 1                       | 560   | 572 |                                   | D1:Replacement of 2 protons by iron:0.00                                                                      | PEAKS PTM |
| total 250 peptides                                      |      |        |           |        |      |          |   |       |          |          |                  |                     |          |                         |       |     |                                   |                                                                                                               |           |

| Peptide                                                       | Uniq | -10lgP | Mass      | Length | ppm  | m/z       | z | RT    | Fraction | Scan     | Source File       | Area Roasted in gel | #Feature | #Feature Roasted in gel | Start | End | PTM                                 | AScore                                                                 | Found By  |
|---------------------------------------------------------------|------|--------|-----------|--------|------|-----------|---|-------|----------|----------|-------------------|---------------------|----------|-------------------------|-------|-----|-------------------------------------|------------------------------------------------------------------------|-----------|
| K.SFNLDE(+53.92)GHALR.I                                       | N    | 31.27  | 1311.5294 | 11     | 1.0  | 438.1842  | 3 | 28.04 | 41       | F41:1362 | OB5954 H1 Ro.raw  | 5.8053E4            | 1        | 1                       | 255   | 265 |                                     | E6:Replacement of 2 protons by iron:16.90                              | PEAKS PTM |
| K.KGSEEEGDITNPINLREGEPLDSN(+.98)NFGK.L                        | Y    | 31.18  | 3059.4319 | 28     | 2.8  | 765.8674  | 4 | 31.36 | 36       | F36:1485 | OB5948 H3B Ro.raw | 0                   | 0        | 0                       | 386   | 413 |                                     | N24:Deamidation (NQ):0.00                                              | PEAKS DB  |
| K.AM(+15.99)VIVVVNK(+57.02)GTGNLELVAVR.K                      | N    | 30.97  | 2154.2195 | 20     | 2.8  | 1078.1200 | 2 | 32.98 | 42       | F42:1664 | OB5955 H1 Ro.raw  | 2.0029E5            | 1        | 1                       | 452   | 471 | Oxidation (M)                       | M2:Oxidation (M):1000.00;K9:Carbamidomethylation (DHKE, X@N-term):0.00 | PEAKS PTM |
| K.KNPQLQDLDMM(+15.99)LTC(+57.02)VEIKEGALMLPHFNSK.A            | N    | 30.83  | 3515.7285 | 30     | 1.3  | 879.9406  | 4 | 35.25 | 42       | F42:1790 | OB5955 H1 Ro.raw  | 0                   | 0        | 0                       | 422   | 451 | Carbamidomethylation                | M11:Oxidation (M):12.28;C14:Carbamidomethylation:1000.00               | PEAKS DB  |
| K.KGSEEEGDITNPINLREGEPLDSNN(+.98)FGK.L                        | Y    | 30.79  | 3059.4319 | 28     | 8.8  | 765.8720  | 4 | 31.05 | 38       | F38:1466 | OB5951 H3A Ro.raw | 0                   | 0        | 0                       | 386   | 413 |                                     | N25:Deamidation (NQ):0.00                                              | PEAKS DB  |
| R.DQSSY(+15.99)LQGFSR.N                                       | N    | 30.72  | 1302.5840 | 11     | 1.6  | 652.3003  | 2 | 29.24 | 43       | F43:1470 | OB5956 H1 Ro.raw  | 6.7205E4            | 1        | 1                       | 308   | 318 | Oxidation or Hydroxylation          | Y5:Oxidation or Hydroxylation:26.36                                    | PEAKS PTM |
| K.SFNLDEGHALRIPSGFISYILNRHDNQN(+.98)LR.V                      | N    | 30.43  | 3496.7600 | 30     | 4.9  | 700.3627  | 5 | 37.51 | 39       | F39:1925 | OB5952 H3A Ro.raw | 2.7478E5            | 1        | 1                       | 255   | 284 |                                     | N28:Deamidation (NQ):10.11                                             | PEAKS DB  |
| D.KDNVIDQIEK.Q                                                | N    | 30.42  | 1200.6350 | 10     | -0.3 | 601.3246  | 2 | 26.31 | 42       | F42:1252 | OB5955 H1 Ro.raw  | 0                   | 0        | 0                       | 547   | 556 |                                     |                                                                        | PEAKS DB  |
| N.TLEAAFNAEFNIRR.V                                            | N    | 30.42  | 1779.8904 | 15     | 3.5  | 890.9556  | 2 | 33.23 | 43       | F43:1696 | OB5956 H1 Ro.raw  | 1.5374E5            | 1        | 1                       | 320   | 334 |                                     |                                                                        | PEAKS DB  |
| R.IPSGFISYILN(+15.99)R.H                                      | N    | 30.30  | 1394.7557 | 12     | -2.8 | 698.3832  | 2 | 36.42 | 41       | F41:1875 | OB5954 H1 Ro.raw  | 3.8045E5            | 1        | 1                       | 266   | 277 |                                     | N11:Oxidation or Hydroxylation:0.00                                    | PEAKS PTM |
| R.IFLAGDKD(-18.01)NV.I                                        | N    | 30.00  | 1072.5553 | 10     | 0.7  | 537.2853  | 2 | 32.26 | 42       | F42:1603 | OB5955 H1 Ro.raw  | 2.1452E6            | 1        | 1                       | 541   | 550 | Dehydration                         | D8:Dehydration:45.01                                                   | PEAKS PTM |
| R.NTLEAAFNAEFN(+15.99)EIRR.V                                  | N    | 29.99  | 1909.9282 | 16     | 0.9  | 955.9723  | 2 | 32.98 | 42       | F42:1662 | OB5955 H1 Ro.raw  | 2.366E6             | 2        | 2                       | 319   | 334 |                                     | N12:Oxidation or Hydroxylation:0.00                                    | PEAKS PTM |
| R.IFLAGDKDNVIDQ(+.98)IEK.Q                                    | N    | 29.73  | 1817.9410 | 16     | 7.7  | 909.9848  | 2 | 63.08 | 43       | F43:3435 | OB5956 H1 Ro.raw  | 3.1606E3            | 1        | 1                       | 541   | 556 |                                     | Q13:Deamidation (NQ):11.12                                             | PEAKS DB  |
| K.V(+57.02)SKEHVEELTK.H                                       | N    | 29.60  | 1354.7092 | 11     | -1.7 | 678.3607  | 2 | 24.05 | 42       | F42:1120 | OB5955 H1 Ro.raw  | 0                   | 0        | 0                       | 368   | 378 |                                     | V1:Carbamidomethylation (DHKE, X@N-term):0.00                          | PEAKS PTM |
| I.F(+127.06)LAGDKDNVIDQIEK.Q                                  | N    | 29.59  | 1830.9363 | 15     | 0.7  | 916.4761  | 2 | 32.18 | 41       | F41:1600 | OB5954 H1 Ro.raw  | 6.5822E4            | 1        | 1                       | 542   | 556 | N-Succinimidyl-2-morpholine acetate | F1:N-Succinimidyl-2-morpholine acetate:28.79                           | PEAKS PTM |
| K.N(+.98)PQLQ(+.98)DLDMMLTC(+57.02)VEIKEGALM(+15.99)LPHFNSK.A | N    | 29.50  | 3389.6016 | 29     | 9.6  | 848.4158  | 4 | 37.65 | 43       | F43:2047 | OB5956 H1 Ro.raw  | 6.1505E6            | 1        | 1                       | 423   | 451 | Carbamidomethylation                | N1:Deamidation (NQ):0.00;Q5:Deamidation (NQ):14.04;C13:Carb            | PEAKS DB  |

total 250 peptides

| Peptide                                                                | Uniq | -10lgP | Mass      | Length | ppm | m/z      | z | RT    | Fraction | Scan     | Source File      | Area Roasted in gel | #Feature | #Feature Roasted in gel | Start | End | PTM                                 | AScore                                                                                                                            | Found By  |
|------------------------------------------------------------------------|------|--------|-----------|--------|-----|----------|---|-------|----------|----------|------------------|---------------------|----------|-------------------------|-------|-----|-------------------------------------|-----------------------------------------------------------------------------------------------------------------------------------|-----------|
|                                                                        |      |        |           |        |     |          |   |       |          |          |                  |                     |          |                         |       |     |                                     | amidomethylation:1000.00;M22:Oxidation (M):0.00                                                                                   |           |
| H.RIVQIEAKPNTLVLPK.H                                                   | N    | 29.34  | 1818.1090 | 16     | 0.6 | 607.0439 | 3 | 29.55 | 42       | F42:1454 | OB5955 H1 Ro.raw | 7.8202E4            | 1        | 1                       | 213   | 228 |                                     |                                                                                                                                   | PEAKS DB  |
| R.NN(+.98)PFYFPSRR.F                                                   | N    | 29.19  | 1297.6204 | 10     | 9.3 | 649.8235 | 2 | 62.71 | 43       | F43:3425 | OB5956 H1 Ro.raw | 0                   | 0        | 0                       | 172   | 181 |                                     | N2:Deamidation (NQ):7.21                                                                                                          | PEAKS DB  |
| R.NTLEAAFNAEFN(+.98)EIR.R                                              | N    | 29.07  | 1738.8162 | 15     | 9.2 | 870.4233 | 2 | 44.36 | 42       | F42:2331 | OB5955 H1 Ro.raw | 5.4416E3            | 1        | 1                       | 319   | 333 |                                     | N12:Deamidation (NQ):0.00                                                                                                         | PEAKS DB  |
| R.EGE(+21.98)QEWGTPGSHVR.E                                             | N    | 28.92  | 1589.6835 | 14     | 1.4 | 795.8501 | 2 | 25.83 | 41       | F41:1231 | OB5954 H1 Ro.raw | 3.6144E3            | 1        | 1                       | 153   | 166 |                                     | E3:Sodium adduct:9.74                                                                                                             | PEAKS PTM |
| K.KNPQ(+.98)LQ(+.98)DLDMM(+15.99)LTC(+57.02)VEIKEGALM(+15.99)LPHFNSK.A | N    | 28.74  | 3533.6914 | 30     | 9.7 | 884.4387 | 4 | 35.77 | 42       | F42:1822 | OB5955 H1 Ro.raw | 2.7541E5            | 1        | 1                       | 422   | 451 | Carbamidomethylation; Oxidation (M) | Q4:Deamidation (NQ):8.22;Q6:Deamidation (NQ):5.55;M11:Oxidation (M):0.00;C14:Carbamidomethylation:1000.00;M23:Oxidation (M):38.29 | PEAKS DB  |
| total 250 peptides                                                     |      |        |           |        |     |          |   |       |          |          |                  |                     |          |                         |       |     |                                     |                                                                                                                                   |           |

sp|P43238|ALL12\_ARAHY

back to list

| [Protein Coverage](#) | [Supporting Peptides](#) |

Protein Coverage:



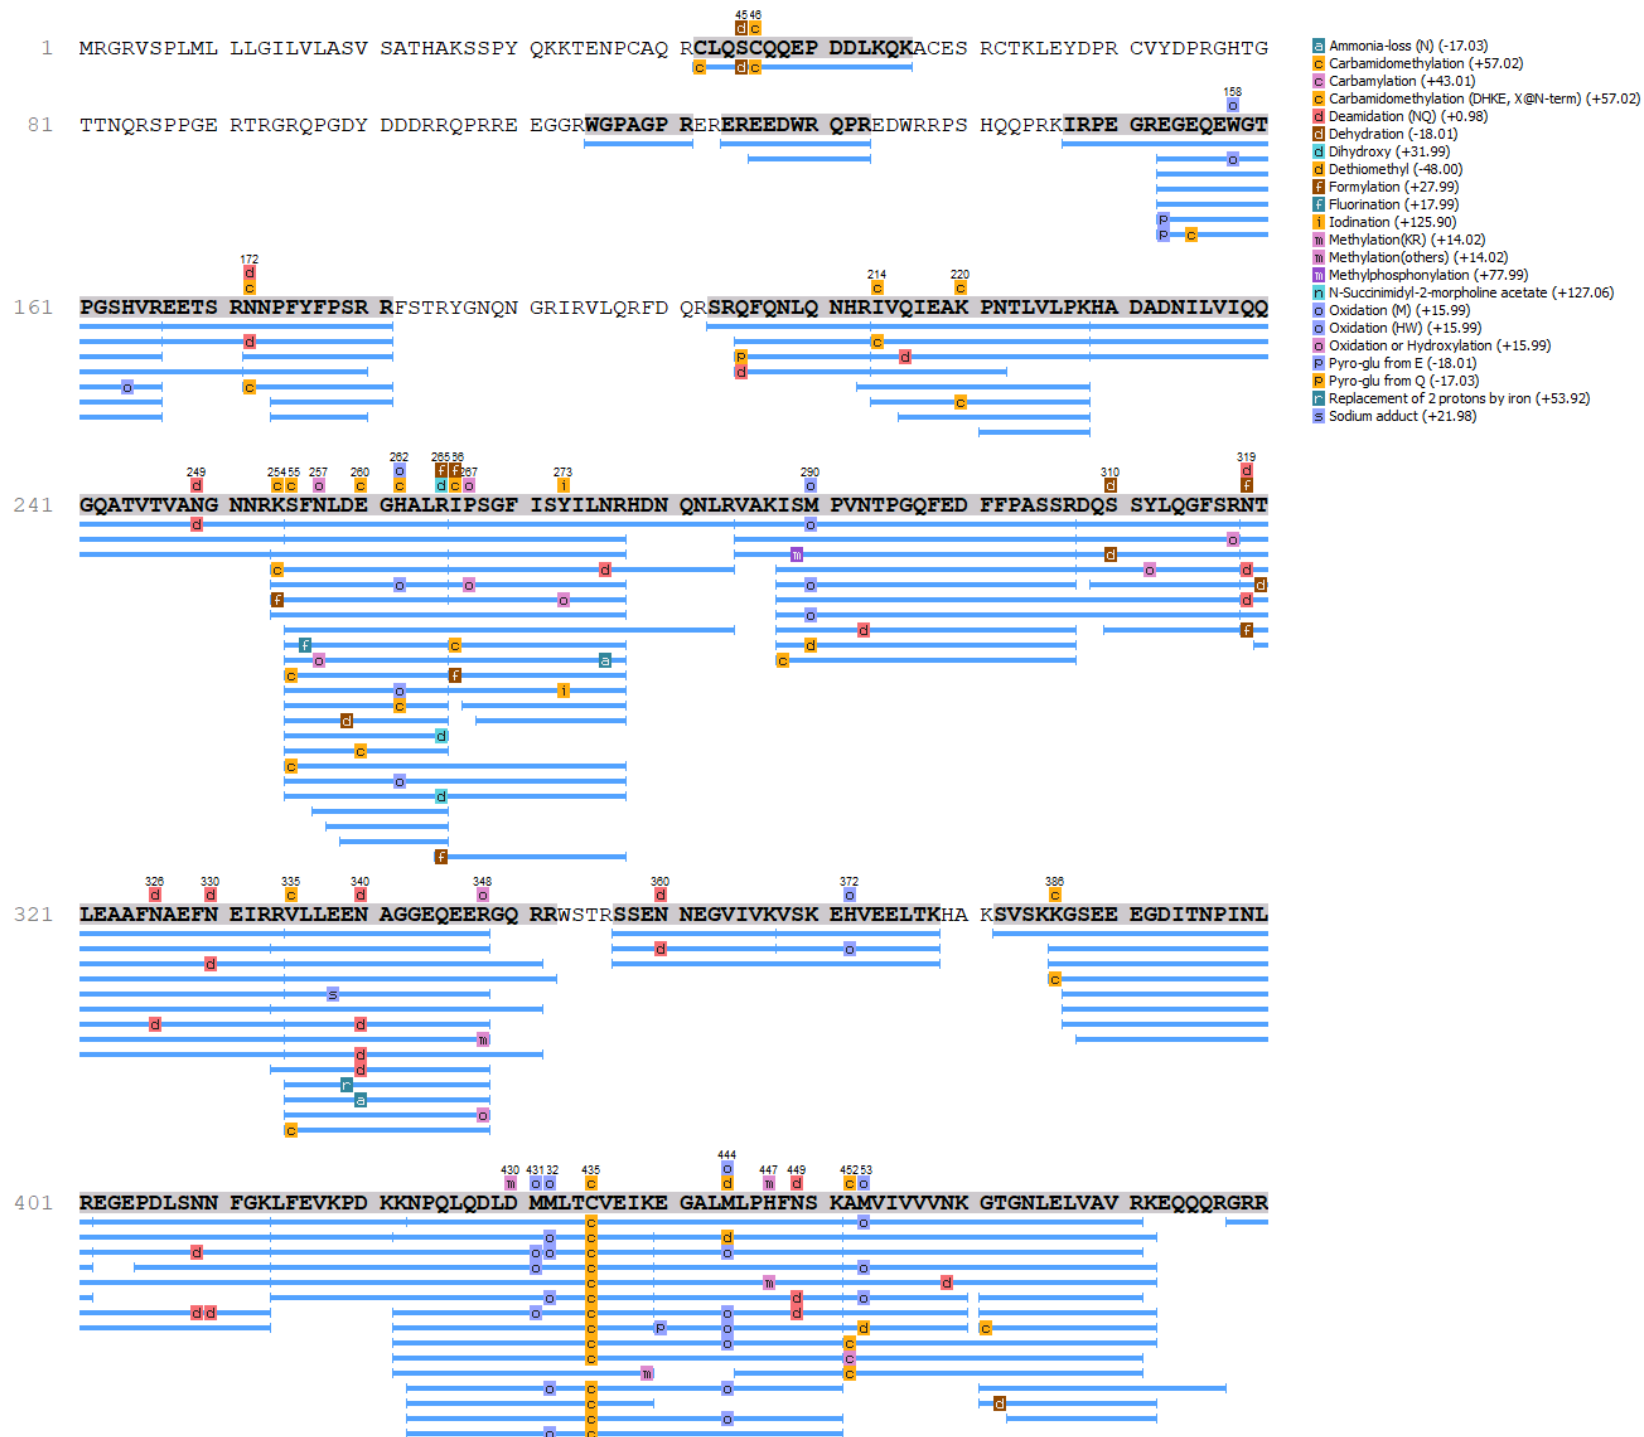

## Supporting Peptides:

| Peptide                                      | Uniq | -10lgP | Mass      | Length | ppm  | m/z       | z | RT    | Fraction | Scan     | Source File       | Area Roasted in gel | #Feature | #Feature Roasted in gel | Start | End | PTM                                 | AScore                                                                                       | Found By |
|----------------------------------------------|------|--------|-----------|--------|------|-----------|---|-------|----------|----------|-------------------|---------------------|----------|-------------------------|-------|-----|-------------------------------------|----------------------------------------------------------------------------------------------|----------|
| K.KNPQLQLDMLMTC(+57.02)VEIK.E                | N    | 136.41 | 2175.0737 | 18     | 1.4  | 1088.5457 | 2 | 35.26 | 43       | F43:1808 | OB5956 H1 Ro.raw  | 1.4906E7            | 6        | 6                       | 422   | 439 | Carbamidomethylation                | C14:Carb amidomet hylation:1 000.00                                                          | PEAKS DB |
| K.KGSEEEGGDITNPINLR                          | N    | 117.89 | 1770.8748 | 16     | 0.6  | 886.4452  | 2 | 28.91 | 43       | F43:1429 | OB5956 H1 Ro.raw  | 3.1542E7            | 8        | 8                       | 386   | 401 |                                     |                                                                                              | PEAKS DB |
| R.NTLEAAFAEAFNEIR.R                          | N    | 130.93 | 1737.8322 | 15     | 1.8  | 869.9249  | 3 | 35.34 | 38       | F38:1714 | OB5951 H3A Ro.raw | 1.332E7             | 16       | 16                      | 319   | 333 |                                     |                                                                                              | PEAKS DB |
| K.NPQLQLDMLMTC(+57.02)VEIK.E                 | N    | 128.40 | 2046.9788 | 17     | 0.2  | 1024.4968 | 2 | 37.11 | 43       | F43:1936 | OB5956 H1 Ro.raw  | 4.4643E7            | 10       | 10                      | 423   | 439 | Carbamidomethylation                | C13:Carb amidomet hylation:1 000.00                                                          | PEAKS DB |
| K.NPQLQLDM(+15.99)MLTC(+57.02)VEIK.E         | N    | 128.16 | 2062.9736 | 17     | -4.2 | 1032.4897 | 2 | 36.93 | 43       | F43:1892 | OB5956 H1 Ro.raw  | 3.3834E6            | 3        | 3                       | 423   | 439 | Oxidation (M); Carbamidomethylation | M9:Oxidat ion (M):3 0.46;C13: Carbamid omethylat ion:1000. 00                                | PEAKS DB |
| K.NPQLQLDMM(+15.99)LTC(+57.02)VEIK.E         | N    | 127.13 | 2062.9736 | 17     | 5.0  | 1032.4993 | 2 | 34.71 | 43       | F43:1780 | OB5956 H1 Ro.raw  | 1.0665E7            | 4        | 4                       | 423   | 439 | Oxidation (M); Carbamidomethylation | M10:Oxid ation (M): 30.46;C1 3:Carbami domethyla tion:1000. 00                               | PEAKS DB |
| K.ISM(+15.99)PVNTPGQFEDFFPASSR.D             | N    | 127.11 | 2242.0364 | 20     | 0.1  | 1122.0284 | 2 | 34.52 | 30       | F30:1521 | OB5926 H3B Ro.raw | 2.1708E7            | 14       | 13                      | 288   | 307 | Oxidation (M)                       | M3:Oxidat ion (M):1 000.00                                                                   | PEAKS DB |
| K.ISMPVNTPGQFEDFFPASSR.D                     | N    | 125.26 | 2226.0415 | 20     | 0.7  | 1114.0288 | 2 | 35.83 | 43       | F43:1868 | OB5956 H1 Ro.raw  | 8.8227E7            | 23       | 23                      | 288   | 307 |                                     |                                                                                              | PEAKS DB |
| K.HADADNIIQQGQATVTVAN(+.98)GNNRK.S           | N    | 123.10 | 2747.3950 | 26     | 3.3  | 916.8087  | 3 | 29.62 | 43       | F43:1472 | OB5956 H1 Ro.raw  | 4.4266E6            | 11       | 11                      | 229   | 254 | Deamidation (NQ)                    | N21:Dea midation (NQ):31.9 1                                                                 | PEAKS DB |
| K.NPQLQLDM(+15.99)M(+15.99)LTC(+57.02)VEIK.E | N    | 121.59 | 2078.9688 | 17     | 6.6  | 1040.4985 | 2 | 33.82 | 43       | F43:1726 | OB5956 H1 Ro.raw  | 6.8984E4            | 2        | 2                       | 423   | 439 | Oxidation (M); Carbamidomethylation | M9:Oxidat ion (M):1 000.00;M 10:Oxidati on (M):10 00.00;C1 3:Carbami domethyla tion:1000. 00 | PEAKS DB |
| K.SFNLDEGHALRIPSGFISYILNR.H                  | N    | 121.49 | 2618.3604 | 23     | 1.0  | 873.7949  | 3 | 37.51 | 41       | F41:1949 | OB5954 H1 Ro.raw  | 9.1637E7            | 28       | 28                      | 255   | 277 |                                     |                                                                                              | PEAKS DB |
| K.KNPQLQLDM(+15.99)MLTC(+57.02)VEIK.E        | N    | 118.68 | 2191.0686 | 18     | 3.6  | 1096.5455 | 2 | 34.71 | 43       | F43:1781 | OB5956 H1 Ro.raw  | 1.3598E6            | 4        | 4                       | 422   | 439 | Oxidation (M); Carbamidomethylation | M10:Oxid ation (M): 27.96;C1 4:Carbami domethyla tion:1000. 00                               | PEAKS DB |
| K.KGSEEEGDITNPINLR.E                         | N    | 117.89 | 1770.8748 | 16     | 0.6  | 886.4452  | 2 | 28.91 | 43       | F43:1429 | OB5956 H1 Ro.raw  | 3.1542E7            | 8        | 8                       | 386   | 401 |                                     |                                                                                              | PEAKS DB |
| K.AMVIVVVNKGTLNELVAVR.K                      | N    | 114.87 | 2081.2031 | 20     | -1.0 | 1041.6078 | 2 | 34.35 | 43       | F43:1758 | OB5956 H1 Ro.raw  | 3.8361E7            | 13       | 13                      | 452   | 471 |                                     |                                                                                              | PEAKS DB |
| R.IFLAGDKDNVIDQIEK.Q                         | N    | 110.41 | 1816.9570 | 16     | -1.1 | 909.4848  | 2 | 32.67 | 43       | F43:1648 | OB5956 H1 Ro.raw  | 4.2419E8            | 56       | 55                      | 541   | 556 |                                     |                                                                                              | PEAKS DB |
| total 250 peptides                           |      |        |           |        |      |           |   |       |          |          |                   |                     |          |                         |       |     |                                     |                                                                                              |          |

| Peptide                                           | Uniq | -10lgP | Mass      | Length | ppm  | m/z       | z | RT    | Fraction | Scan     | Source File       | Area Roasted in gel | #Feature | #Feature Roasted in gel | Start | End | PTM                                   | AScore                                                   | Found By  |
|---------------------------------------------------|------|--------|-----------|--------|------|-----------|---|-------|----------|----------|-------------------|---------------------|----------|-------------------------|-------|-----|---------------------------------------|----------------------------------------------------------|-----------|
| K.KNPQLQDLDMM(+15.99)LTC(+57.02)VEIK.E            | N    | 110.35 | 2191.0686 | 18     | 3.5  | 1096.5454 | 2 | 32.98 | 42       | F42:1657 | OB5955 H1 Ro.raw  | 1.6495E6            | 4        | 4                       | 422   | 439 | Oxidation (M); Carbamidomethylation   | M11:Oxidation (M):23.10;C14:Carbamidomethylation:1000.00 | PEAKS DB  |
| R.IPSGFISYILNR.H                                  | N    | 109.18 | 1378.7609 | 12     | 2.5  | 690.3894  | 2 | 36.50 | 38       | F38:1780 | OB5951 H3A Ro.raw | 4.4166E8            | 20       | 20                      | 266   | 277 |                                       |                                                          | PEAKS DB  |
| K.HADADNILVIQQGQATVTVANGNNRK.S                    | N    | 108.34 | 2746.4111 | 26     | 1.9  | 916.4794  | 3 | 29.61 | 43       | F43:1451 | OB5956 H1 Ro.raw  | 3.8404E6            | 5        | 5                       | 229   | 254 |                                       |                                                          | PEAKS DB  |
| R.VLLEENAGGEQEER.G                                | N    | 108.33 | 1571.7427 | 14     | 2.4  | 786.8805  | 2 | 26.83 | 42       | F42:1293 | OB5955 H1 Ro.raw  | 2.9858E7            | 10       | 10                      | 335   | 348 |                                       |                                                          | PEAKS DB  |
| R.KSFNLDEGHALR.I                                  | N    | 108.28 | 1385.7051 | 12     | 0.6  | 462.9092  | 3 | 26.14 | 43       | F43:1252 | OB5956 H1 Ro.raw  | 5.3666E6            | 6        | 6                       | 254   | 265 |                                       |                                                          | PEAKS DB  |
| K.GSEEEGDITNPINLR.E                               | N    | 108.06 | 1642.7798 | 15     | -0.5 | 822.3967  | 2 | 30.80 | 42       | F42:1519 | OB5955 H1 Ro.raw  | 1.1767E7            | 3        | 3                       | 387   | 401 |                                       |                                                          | PEAKS DB  |
| K.AMVIVVVKGTGNLELVAVRK.E                          | N    | 107.96 | 2209.2981 | 21     | 1.1  | 737.4408  | 3 | 33.05 | 43       | F43:1682 | OB5956 H1 Ro.raw  | 1.2362E8            | 20       | 20                      | 452   | 472 |                                       |                                                          | PEAKS DB  |
| R.I(+57.02)PSGFISYILNR.H                          | N    | 107.77 | 1435.7823 | 12     | -3.6 | 718.8959  | 2 | 36.92 | 43       | F43:1901 | OB5956 H1 Ro.raw  | 1.7559E7            | 7        | 7                       | 266   | 277 | Carbamidomethylation (DHKE, X@N-term) | I1:Carbamidomethylation (DHKE, X@N-term):1000.00         | PEAKS PTM |
| R.I(+57.02)FLAGDKDNVIDQIEK.Q                      | N    | 105.70 | 1873.9785 | 16     | 1.7  | 937.9982  | 2 | 32.48 | 43       | F43:1653 | OB5956 H1 Ro.raw  | 1.1722E7            | 5        | 5                       | 541   | 556 | Carbamidomethylation (DHKE, X@N-term) | I1:Carbamidomethylation (DHKE, X@N-term):90.91           | PEAKS PTM |
| R.DQSSYLQGFSR.N                                   | N    | 105.08 | 1286.5891 | 11     | 0.8  | 644.3024  | 2 | 30.81 | 40       | F40:1431 | OB5953 H3A Ro.raw | 9.5783E7            | 31       | 31                      | 308   | 318 |                                       |                                                          | PEAKS DB  |
| R.EGEQEWGTPGSHVR.E                                | N    | 104.71 | 1567.7015 | 14     | 2.6  | 784.8601  | 2 | 25.68 | 42       | F42:1206 | OB5955 H1 Ro.raw  | 3.4943E6            | 6        | 6                       | 153   | 166 |                                       |                                                          | PEAKS DB  |
| R.V(+57.02)LLEENAGGEQEER.G                        | N    | 103.80 | 1628.7642 | 14     | 0.3  | 815.3896  | 2 | 27.08 | 43       | F43:1322 | OB5956 H1 Ro.raw  | 4.0193E5            | 3        | 3                       | 335   | 348 | Carbamidomethylation (DHKE, X@N-term) | V1:Carbamidomethylation (DHKE, X@N-term):49.37           | PEAKS PTM |
| K.NPQLQDLDMMLTCVEIK(+14.02).E                     | N    | 103.68 | 2003.9730 | 17     | -1.2 | 1002.9926 | 2 | 38.20 | 43       | F43:1989 | OB5956 H1 Ro.raw  | 5.9168E6            | 4        | 4                       | 423   | 439 | Methylation(KR)                       | K17:Methylation(KR):1000.00                              | PEAKS PTM |
| K.SFNLDEGHALR.I                                   | N    | 103.18 | 1257.6101 | 11     | -1.7 | 629.8113  | 2 | 28.00 | 43       | F43:1362 | OB5956 H1 Ro.raw  | 1.1584E8            | 33       | 31                      | 255   | 265 |                                       |                                                          | PEAKS DB  |
| K.AM(+15.99)VIVVVKGTGNLELVAVR.K                   | N    | 103.14 | 2097.1980 | 20     | 1.6  | 700.0744  | 3 | 33.04 | 43       | F43:1684 | OB5956 H1 Ro.raw  | 2.3148E7            | 9        | 9                       | 452   | 471 | Oxidation (M)                         | M2:Oxidation (M):1000.00                                 | PEAKS DB  |
| K.DLAFPGSGEQVEK.L                                 | N    | 100.93 | 1375.6619 | 13     | -1.9 | 688.8369  | 2 | 30.34 | 43       | F43:1508 | OB5956 H1 Ro.raw  | 9.196E7             | 8        | 8                       | 560   | 572 |                                       |                                                          | PEAKS DB  |
| K.NPQLQDLDM(+15.99)MLTC(+57.02)VEIKEGALMLPHFNSK.A | N    | 100.40 | 3387.6335 | 29     | -0.6 | 1130.2178 | 3 | 37.70 | 41       | F41:1939 | OB5954 H1 Ro.raw  | 8.7706E7            | 6        | 6                       | 423   | 451 | Oxidation (M); Carbamidomethylation   | M9:Oxidation (M):26.02;C13:Carbamidomethylation:1000.00  | PEAKS DB  |
| total 250 peptides                                |      |        |           |        |      |           |   |       |          |          |                   |                     |          |                         |       |     |                                       |                                                          |           |

| Peptide                                   | Uniq | -10lgP | Mass      | Length | ppm  | m/z       | z | RT    | Fraction | Scan     | Source File      | Area Roasted in gel | #Feature | #Feature Roasted in gel | Start | End | PTM                                   | AScore                                                        | Found By  |
|-------------------------------------------|------|--------|-----------|--------|------|-----------|---|-------|----------|----------|------------------|---------------------|----------|-------------------------|-------|-----|---------------------------------------|---------------------------------------------------------------|-----------|
| R.RVLLLEENAGGEQEER.G                      | N    | 100.35 | 1727.8438 | 15     | 0.2  | 576.9553  | 3 | 25.30 | 42       | F42:1185 | OB5955 H1 Ro.raw | 8.2964E5            | 6        | 6                       | 334   | 348 |                                       |                                                               | PEAKS DB  |
| K.NPQLQLDMLMTC(+57.02)VEIKEGALMLPHFNSK.A  | N    | 98.85  | 3371.6387 | 29     | -2.7 | 843.9147  | 4 | 38.02 | 43       | F43:1969 | OB5956 H1 Ro.raw | 1.5351E8            | 12       | 12                      | 423   | 451 | Carbamidomethylation                  | C13:Carb amidomet hylation:1 000.00                           | PEAKS DB  |
| R.EGEPDLSNNFGK.L                          | Y    | 98.79  | 1305.5836 | 12     | -0.8 | 653.7986  | 2 | 28.17 | 43       | F43:1363 | OB5956 H1 Ro.raw | 1.5024E7            | 3        | 3                       | 402   | 413 |                                       |                                                               | PEAKS DB  |
| K.GSEEEGDITNPINLREGEPLDLSNNFGK.L          | Y    | 98.63  | 2930.3530 | 27     | -8.3 | 977.7835  | 3 | 32.31 | 43       | F43:1637 | OB5956 H1 Ro.raw | 2.5702E6            | 8        | 8                       | 387   | 413 |                                       |                                                               | PEAKS DB  |
| K.KNPQLQLDMLMTC(+57.02)VEIKEGALMLPHFNSK.A | N    | 97.96  | 3499.7336 | 30     | -3.9 | 875.9373  | 4 | 36.80 | 41       | F41:1884 | OB5954 H1 Ro.raw | 6.677E6             | 4        | 4                       | 422   | 451 | Carbamidomethylation                  | C14:Carb amidomet hylation:1 000.00                           | PEAKS DB  |
| R.VLLEEN(+.98)AGGEQEER.G                  | N    | 94.48  | 1572.7267 | 14     | 2.8  | 787.3728  | 2 | 27.46 | 43       | F43:1340 | OB5956 H1 Ro.raw | 6.2395E5            | 3        | 3                       | 335   | 348 | Deamidation (NQ)                      | N6:Deami dation (N Q):121.37                                  | PEAKS DB  |
| R.IFLAGDKDNVIDQIEKQAK.D                   | N    | 94.35  | 2144.1477 | 19     | -2.1 | 715.7217  | 3 | 32.42 | 42       | F42:1625 | OB5955 H1 Ro.raw | 3.3984E6            | 9        | 9                       | 541   | 559 |                                       |                                                               | PEAKS DB  |
| R.KSFNLDEGHALRIPSGFISYILNR.H              | N    | 93.78  | 2746.4553 | 24     | -0.7 | 687.6206  | 4 | 36.29 | 43       | F43:1876 | OB5956 H1 Ro.raw | 1.1783E6            | 4        | 4                       | 254   | 277 |                                       |                                                               | PEAKS DB  |
| F.LAGDKDNVIDQIEK.Q                        | N    | 91.83  | 1556.8046 | 14     | -6.3 | 779.4047  | 2 | 32.21 | 43       | F43:1629 | OB5956 H1 Ro.raw | 5.4162E6            | 4        | 4                       | 543   | 556 |                                       |                                                               | PEAKS DB  |
| R.IPSGFISYILN(-17.03)R.H                  | N    | 91.80  | 1361.7343 | 12     | -4.9 | 681.8711  | 2 | 38.02 | 43       | F43:1980 | OB5956 H1 Ro.raw | 1.3387E6            | 3        | 3                       | 266   | 277 | Ammonia-loss (N)                      | N11:Amm onia-loss (N):1000. 00                                | PEAKS PTM |
| K.AMVIVVVK.G                              | N    | 91.04  | 971.5837  | 9      | -0.5 | 486.7989  | 2 | 30.16 | 43       | F43:1494 | OB5956 H1 Ro.raw | 7.1361E6            | 3        | 3                       | 452   | 460 |                                       |                                                               | PEAKS DB  |
| K.SFNLDEGH(+15.99)ALR.I                   | N    | 90.73  | 1273.6051 | 11     | 0.9  | 637.8104  | 2 | 30.16 | 43       | F43:1507 | OB5956 H1 Ro.raw | 8.7681E5            | 2        | 2                       | 255   | 265 | Oxidation (HW)                        | H8:Oxidat ion (HW): 1000.00                                   | PEAKS PTM |
| R.NNPFYFPSRR.F                            | N    | 89.95  | 1296.6364 | 10     | -2.5 | 649.3239  | 2 | 28.89 | 43       | F43:1417 | OB5956 H1 Ro.raw | 1.3445E8            | 22       | 22                      | 172   | 181 |                                       |                                                               | PEAKS DB  |
| K.D(+57.02)LAFPGSGEQVEK.L                 | N    | 88.60  | 1432.6833 | 13     | -0.1 | 717.3489  | 2 | 31.08 | 41       | F41:1535 | OB5954 H1 Ro.raw | 9.7986E5            | 3        | 3                       | 560   | 572 | Carbamidomethylation (DHKE, X@N-term) | D1:Carba midometh ylation (D HKE, X@N -term):13 1.10          | PEAKS PTM |
| K.SFNLDEGH(+57.02)ALR.I                   | N    | 88.30  | 1314.6316 | 11     | -0.1 | 658.3230  | 2 | 28.22 | 41       | F41:1349 | OB5954 H1 Ro.raw | 2.9996E6            | 3        | 3                       | 255   | 265 | Carbamidomethylation (DHKE, X@N-term) | H8:Carba midometh ylation (D HKE, X@N -term):3 0.36           | PEAKS PTM |
| R.IVQIEAKPNTLVLPK.H                       | N    | 88.27  | 1662.0079 | 15     | 0.9  | 832.0120  | 2 | 30.16 | 43       | F43:1505 | OB5956 H1 Ro.raw | 2.8901E7            | 31       | 31                      | 214   | 228 |                                       |                                                               | PEAKS DB  |
| K.EGALMLPHFNSK.A                          | N    | 88.21  | 1342.6703 | 12     | 2.5  | 672.3441  | 2 | 30.67 | 43       | F43:1529 | OB5956 H1 Ro.raw | 1.4087E7            | 5        | 5                       | 440   | 451 |                                       |                                                               | PEAKS DB  |
| K.NPQLQLDMM(-48.00)LTC(+57.02)VEIK.E      | N    | 88.05  | 1998.9755 | 17     | 1.9  | 1000.4969 | 2 | 32.85 | 43       | F43:1670 | OB5956 H1 Ro.raw | 5.9032E6            | 3        | 3                       | 423   | 439 | Carbamidomethylation                  | M10:Dethi omethyl:1 4.02;C13: Carbamid omethylat ion:1000. 00 | PEAKS PTM |
| R.NNPFYFPSR.R                             | N    | 86.35  | 1140.5352 | 9      | -0.1 | 571.2748  | 2 | 31.76 | 43       | F43:1593 | OB5956 H1 Ro.raw | 1.7218E7            | 11       | 11                      | 172   | 180 |                                       |                                                               | PEAKS DB  |
| total 250 peptides                        |      |        |           |        |      |           |   |       |          |          |                  |                     |          |                         |       |     |                                       |                                                               |           |

| Peptide                                            | Uniq | -10lgP | Mass      | Length | ppm  | m/z       | z | RT    | Fraction | Scan     | Source File       | Area Roasted in gel | #Feature | #Feature Roasted in gel | Start | End | PTM                                   | AScore                                                    | Found By  |
|----------------------------------------------------|------|--------|-----------|--------|------|-----------|---|-------|----------|----------|-------------------|---------------------|----------|-------------------------|-------|-----|---------------------------------------|-----------------------------------------------------------|-----------|
| K.S(+57.02)FNLDEGHALR.I                            | N    | 86.31  | 1314.6316 | 11     | -0.5 | 658.3228  | 2 | 28.11 | 42       | F42:1359 | OB5955 H1 Ro.raw  | 2.6997E6            | 4        | 4                       | 255   | 265 | Carbamidomethylation (DHKE, X@N-term) | S1:Carbamidomethylation (DHKE, X@N-term):91.04            | PEAKS PTM |
| I.PSGFISYILNR.H                                    | N    | 85.97  | 1265.6768 | 11     | -4.6 | 633.8427  | 2 | 36.75 | 43       | F43:1894 | OB5956 H1 Ro.raw  | 3.5986E5            | 2        | 2                       | 267   | 277 |                                       |                                                           | PEAKS DB  |
| R.SSENNEGVIVK.V                                    | Y    | 85.30  | 1174.5830 | 11     | 0.1  | 588.2988  | 2 | 23.40 | 43       | F43:1111 | OB5956 H1 Ro.raw  | 5.1333E5            | 3        | 3                       | 357   | 367 |                                       |                                                           | PEAKS DB  |
| R.IPSGFISYILNRHDNQNLNR.V                           | N    | 84.75  | 2256.1763 | 19     | 6.5  | 753.0709  | 3 | 33.61 | 43       | F43:1714 | OB5956 H1 Ro.raw  | 6.1581E7            | 21       | 21                      | 266   | 284 |                                       |                                                           | PEAKS DB  |
| R.I(+27.99)FLAGDKDNVIDQIEK.Q                       | N    | 84.60  | 1844.9519 | 16     | -2.1 | 923.4813  | 2 | 36.23 | 41       | F41:1853 | OB5954 H1 Ro.raw  | 1.9485E6            | 3        | 3                       | 541   | 556 | Formylation                           | I1:Formylation:98.75                                      | PEAKS PTM |
| R.EGEQEWGTPGSHVREETSR.N                            | N    | 83.87  | 2169.9675 | 19     | 2.2  | 724.3314  | 3 | 26.51 | 43       | F43:1287 | OB5956 H1 Ro.raw  | 5.5466E5            | 3        | 3                       | 153   | 171 |                                       |                                                           | PEAKS DB  |
| K.SFNLDEGH(+15.99)ALRIPSGFISYILNR.H                | N    | 83.49  | 2634.3555 | 23     | -4.0 | 879.1223  | 3 | 38.76 | 43       | F43:2023 | OB5956 H1 Ro.raw  | 8.8519E5            | 1        | 1                       | 255   | 277 | Oxidation (HW)                        | H8:Oxidation (HW):1000.00                                 | PEAKS PTM |
| K.KNPQLQDLDMMLTC(+57.02)VEIKEGALM(+15.99)LPHFNSK.A | N    | 83.11  | 3515.7285 | 30     | -1.9 | 879.9377  | 4 | 36.03 | 43       | F43:1857 | OB5956 H1 Ro.raw  | 6.6263E6            | 3        | 3                       | 422   | 451 | Carbamidomethylation; Oxidation (M)   | C14:Carbamidomethylation:1000.00;M23:Oxidation (M):114.34 | PEAKS DB  |
| R.NTLEAAFAEFNEIRR.V                                | N    | 82.99  | 1893.9332 | 16     | -2.6 | 947.9714  | 2 | 34.11 | 42       | F42:1711 | OB5955 H1 Ro.raw  | 3.0959E8            | 36       | 35                      | 319   | 334 |                                       |                                                           | PEAKS DB  |
| K.A(+57.02)MVIVVVNKG TGNLLELVAVR.K                 | N    | 82.14  | 2138.2246 | 20     | -5.4 | 1070.1138 | 2 | 34.47 | 42       | F42:1739 | OB5955 H1 Ro.raw  | 4.4412E6            | 3        | 3                       | 452   | 471 | Carbamidomethylation (DHKE, X@N-term) | A1:Carbamidomethylation (DHKE, X@N-term):207.56           | PEAKS PTM |
| K.DLAFPGSGEQVEKLIK.N                               | N    | 80.89  | 1729.9249 | 16     | -1.6 | 865.9706  | 2 | 33.95 | 30       | F30:1478 | OB5926 H3B Ro.raw | 3.9305E5            | 5        | 4                       | 560   | 575 |                                       |                                                           | PEAKS DB  |
| I.FLAGDKDNVIDQIEK.Q                                | N    | 80.64  | 1703.8729 | 15     | -5.7 | 852.9388  | 2 | 32.22 | 43       | F43:1635 | OB5956 H1 Ro.raw  | 3.1343E5            | 3        | 3                       | 542   | 556 |                                       |                                                           | PEAKS DB  |
| K.EGALM(+15.99)LPHFNSK.A                           | N    | 80.48  | 1358.6653 | 12     | 1.1  | 680.3406  | 2 | 29.85 | 43       | F43:1485 | OB5956 H1 Ro.raw  | 3.0314E6            | 5        | 5                       | 440   | 451 | Oxidation (M)                         | M5:Oxidation (M):1000.00                                  | PEAKS DB  |
| K.GTGNLLELVAVR.K                                   | N    | 80.39  | 1127.6299 | 11     | -1.3 | 564.8215  | 2 | 30.21 | 41       | F41:1476 | OB5954 H1 Ro.raw  | 2.4706E7            | 5        | 5                       | 461   | 471 |                                       |                                                           | PEAKS DB  |
| R.NTLEAAFN(+.98)AEFNEIRR.V                         | N    | 79.02  | 1894.9172 | 16     | -2.2 | 948.4638  | 2 | 32.35 | 41       | F41:1616 | OB5954 H1 Ro.raw  | 1.3357E6            | 5        | 5                       | 319   | 334 | Deamidation (NQ)                      | N8:Deamidation (NQ):48.12                                 | PEAKS DB  |
| R.VLLEENAGGEQEER(+14.02).G                         | N    | 78.92  | 1585.7583 | 14     | 0.7  | 793.8870  | 2 | 27.86 | 41       | F41:1339 | OB5954 H1 Ro.raw  | 1.6341E5            | 3        | 3                       | 335   | 348 | Methylation(KR)                       | R14:Methylation(KR):1000.00                               | PEAKS PTM |
| K.GTGNLLELVAVRK.E                                  | N    | 78.87  | 1255.7249 | 12     | 0.7  | 628.8701  | 2 | 27.30 | 41       | F41:1322 | OB5954 H1 Ro.raw  | 2.29E7              | 10       | 10                      | 461   | 472 |                                       |                                                           | PEAKS DB  |
| R.QFQNLQNHR.I                                      | N    | 78.35  | 1183.5846 | 9      | 0.0  | 592.7996  | 2 | 23.81 | 42       | F42:1102 | OB5955 H1 Ro.raw  | 1.5125E5            | 6        | 6                       | 205   | 213 |                                       |                                                           | PEAKS DB  |
| K.K(+57.02)GSEEEGDITNPINLR.E                       | N    | 78.20  | 1827.8962 | 16     | -0.5 | 914.9550  | 2 | 28.83 | 42       | F42:1409 | OB5955 H1 Ro.raw  | 1.3158E5            | 2        | 2                       | 386   | 401 | Carbamidomethylation (DHKE, X@N-term) | K1:Carbamidomethylation (DHKE, X@N-term):32.46            | PEAKS PTM |
| total 250 peptides                                 |      |        |           |        |      |           |   |       |          |          |                   |                     |          |                         |       |     |                                       |                                                           |           |

| Peptide                                                    | Uniq | -10lgP | Mass      | Length | ppm  | m/z       | z | RT    | Fraction | Scan     | Source File      | Area Roasted in gel | #Feature | #Feature Roasted in gel | Start | End | PTM                                 | AScore                                                                           | Found By  |
|------------------------------------------------------------|------|--------|-----------|--------|------|-----------|---|-------|----------|----------|------------------|---------------------|----------|-------------------------|-------|-----|-------------------------------------|----------------------------------------------------------------------------------|-----------|
| K.NPQLQDLDDMM(+15.99)LTC(+57.02)VEIKEGALMLPHFNSK.A         | N    | 78.01  | 3387.6335 | 29     | -0.8 | 1130.2175 | 3 | 36.42 | 41       | F41:1862 | OB5954 H1 Ro.raw | 6.8935E7            | 6        | 6                       | 423   | 451 | Oxidation (M); Carbamidomethylation | M10:Oxidation (M):24.44;C13:Carbamidomethylation:1000.00                         | PEAKS DB  |
| K.LFEVKPKDKNPQLQDLDDMLTC(+57.02)VEIK.E                     | N    | 77.87  | 3131.6069 | 26     | -4.0 | 1044.8721 | 3 | 34.65 | 42       | F42:1756 | OB5955 H1 Ro.raw | 5.0788E6            | 4        | 4                       | 414   | 439 | Carbamidomethylation                | C22:Carbamidomethylation:1000.00                                                 | PEAKS DB  |
| K.NPQLQDLDM(+15.99)MLTC(+57.02)VEIKEGALM(+15.99)LPHFNSK.A  | N    | 77.10  | 3403.6284 | 29     | 1.1  | 851.9153  | 4 | 37.51 | 41       | F41:1883 | OB5954 H1 Ro.raw | 7.3887E6            | 7        | 7                       | 423   | 451 | Oxidation (M); Carbamidomethylation | M9:Oxidation (M):27.96;C13:Carbamidomethylation:1000.00;M22:Oxidation (M):71.31  | PEAKS DB  |
| R.IFLAGDKDNVIDQIEKQ(+.98)AK.D                              | N    | 76.22  | 2145.1316 | 19     | 1.5  | 716.0522  | 3 | 33.08 | 42       | F42:1661 | OB5955 H1 Ro.raw | 0                   | 0        | 0                       | 541   | 559 | Deamidation (NQ)                    | Q17:Deamidation (NQ):48.83                                                       | PEAKS DB  |
| R.EETSRN(+.98)NPYFPSRR.F                                   | N    | 75.62  | 1899.8864 | 15     | -0.2 | 634.3026  | 3 | 28.39 | 41       | F41:1381 | OB5954 H1 Ro.raw | 3.2976E5            | 2        | 2                       | 167   | 181 | Deamidation (NQ)                    | N6:Deamidation (NQ):33.98                                                        | PEAKS DB  |
| L.AGDKDNVIDQIEK.Q                                          | N    | 75.39  | 1443.7205 | 13     | -3.7 | 722.8649  | 2 | 32.08 | 42       | F42:1607 | OB5955 H1 Ro.raw | 3.3426E5            | 1        | 1                       | 544   | 556 |                                     |                                                                                  | PEAKS DB  |
| R.Q(-17.03)FQNLQNHR.I                                      | N    | 75.35  | 1166.5581 | 9      | -1.2 | 584.2856  | 2 | 28.00 | 43       | F43:1365 | OB5956 H1 Ro.raw | 4.927E6             | 4        | 4                       | 205   | 213 | Pyro-glu from Q                     | Q1:Pyro-glu from Q:1000.00                                                       | PEAKS PTM |
| R.VAKISMPVNTPGQFEDFFPASSR.D                                | N    | 74.27  | 2524.2419 | 23     | -2.9 | 842.4188  | 3 | 34.29 | 42       | F42:1735 | OB5955 H1 Ro.raw | 1.4483E6            | 3        | 3                       | 285   | 307 |                                     |                                                                                  | PEAKS DB  |
| K.NPQLQDLDM(+15.99)M(+15.99)LTC(+57.02)VEIKEGALMLPHFNSK.A  | N    | 73.00  | 3403.6284 | 29     | -3.9 | 1135.5457 | 3 | 35.83 | 43       | F43:1849 | OB5956 H1 Ro.raw | 7.8068E6            | 5        | 5                       | 423   | 451 | Oxidation (M); Carbamidomethylation | M9:Oxidation (M):54.18;M10:Oxidation (M):63.99;C13:Carbamidomethylation:1000.00  | PEAKS DB  |
| K.KNPQLQDLDM(+15.99)MLTC(+57.02)VEIKEGALM(+15.99)LPHFNSK.A | N    | 72.71  | 3531.7234 | 30     | -1.9 | 883.9364  | 4 | 35.86 | 41       | F41:1821 | OB5954 H1 Ro.raw | 7.53E5              | 1        | 1                       | 422   | 451 | Carbamidomethylation; Oxidation (M) | M10:Oxidation (M):17.01;C14:Carbamidomethylation:1000.00;M23:Oxidation (M):85.25 | PEAKS DB  |
| R.VLLEENAGGEQEERGQR.R                                      | N    | 72.44  | 1912.9238 | 17     | 0.6  | 957.4698  | 2 | 25.30 | 42       | F42:1191 | OB5955 H1 Ro.raw | 3.1353E6            | 8        | 8                       | 335   | 351 |                                     |                                                                                  | PEAKS DB  |
| K.VSKEHVEELTK.H                                            | N    | 72.42  | 1297.6877 | 11     | -0.3 | 649.8510  | 2 | 24.21 | 41       | F41:1125 | OB5954 H1 Ro.raw | 2.2246E5            | 5        | 5                       | 368   | 378 |                                     |                                                                                  | PEAKS DB  |
| K.QAKDLAFPGSGEQVEK.L                                       | N    | 72.39  | 1702.8525 | 16     | 1.2  | 568.6255  | 3 | 27.08 | 43       | F43:1321 | OB5956 H1 Ro.raw | 2.8232E5            | 6        | 6                       | 557   | 572 |                                     |                                                                                  | PEAKS DB  |
| K.EGALMLPHFN(+.98)SK.A                                     | N    | 71.37  | 1343.6543 | 12     | 2.6  | 672.8362  | 2 | 31.66 | 43       | F43:1595 | OB5956 H1 Ro.raw | 1.0101E5            | 2        | 2                       | 440   | 451 | Deamidation (NQ)                    | N10:Deamidation (NQ):1000.00                                                     | PEAKS DB  |
| F.NLDEGHALR.I                                              | N    | 70.14  | 1023.5097 | 9      | -2.5 | 512.7609  | 2 | 28.00 | 43       | F43:1370 | OB5956 H1 Ro.raw | 2.6181E6            | 3        | 3                       | 257   | 265 |                                     |                                                                                  | PEAKS DB  |
| total 250 peptides                                         |      |        |           |        |      |           |   |       |          |          |                  |                     |          |                         |       |     |                                     |                                                                                  |           |

| Peptide                                        | Uniq | -10lgP | Mass      | Length | ppm  | m/z       | z | RT    | Fraction | Scan     | Source File      | Area Roasted in gel | #Feature | #Feature Roasted in gel | Start | End | PTM                                          | AScore                                                     | Found By  |
|------------------------------------------------|------|--------|-----------|--------|------|-----------|---|-------|----------|----------|------------------|---------------------|----------|-------------------------|-------|-----|----------------------------------------------|------------------------------------------------------------|-----------|
| R.N(+.98)TLEAAFNAEFNEIRR.V                     | N    | 69.73  | 1894.9172 | 16     | 0.4  | 948.4662  | 2 | 32.39 | 42       | F42:1620 | OB5955 H1 Ro.raw | 2.6319E6            | 3        | 3                       | 319   | 334 | Deamidation (NQ)                             | N1:Deamidation (NQ):41.52                                  | PEAKS DB  |
| R.EGEPDLN(+.98)NFGK.L                          | Y    | 69.72  | 1306.5676 | 12     | -0.5 | 654.2908  | 2 | 28.90 | 43       | F43:1436 | OB5956 H1 Ro.raw | 4.1115E5            | 3        | 3                       | 402   | 413 | Deamidation (NQ)                             | N8:Deamidation (NQ):30.46                                  | PEAKS DB  |
| R.K(+57.02)SFNLDEGHALR.I                       | N    | 69.20  | 1442.7266 | 12     | -0.1 | 722.3705  | 2 | 26.25 | 42       | F42:1250 | OB5955 H1 Ro.raw | 4.0798E5            | 6        | 6                       | 254   | 265 | Carbamidomethylation (DHKE, X@N-term):76.17  | K1:Carbamidomethylation (DHKE, X@N-term):76.17             | PEAKS PTM |
| K.LFEVKPKKPNQLQDLDDMM(+15.99)LTC(+57.02)VEIK.E | N    | 69.17  | 3147.6018 | 26     | 2.2  | 787.9095  | 4 | 33.24 | 42       | F42:1670 | OB5955 H1 Ro.raw | 2.0797E6            | 2        | 2                       | 414   | 439 | Oxidation (M); Carbamidomethylation          | M19:Oxidation (M):40.00;C2:Carbamidomethylation:1000.00    | PEAKS DB  |
| K.SFNLDE(+57.02)GHALRIPSGFISYILNR.H            | N    | 69.07  | 2675.3818 | 23     | -1.9 | 892.7996  | 3 | 37.80 | 43       | F43:1964 | OB5956 H1 Ro.raw | 0                   | 0        | 0                       | 255   | 277 |                                              | E6:Carbamidomethylation (DHKE, X@N-term):0.00              | PEAKS PTM |
| R.IFLAGDKDNVID(+57.02)QIEK.Q                   | N    | 69.05  | 1873.9785 | 16     | -1.3 | 937.9953  | 2 | 32.42 | 42       | F42:1608 | OB5955 H1 Ro.raw | 8.0339E6            | 1        | 1                       | 541   | 556 |                                              | D12:Carbamidomethylation (DHKE, X@N-term):15.85            | PEAKS PTM |
| R.EGEQEWGTGPSH(+15.99)VR.E                     | N    | 68.71  | 1583.6964 | 14     | 0.8  | 792.8561  | 2 | 27.64 | 43       | F43:1358 | OB5956 H1 Ro.raw | 1.1836E5            | 4        | 4                       | 153   | 166 | Oxidation (HW)                               | H12:Oxidation (HW):95.51                                   | PEAKS PTM |
| A.GDKDNVIDQIEK.Q                               | N    | 68.14  | 1372.6833 | 12     | -7.0 | 687.3441  | 2 | 32.22 | 43       | F43:1632 | OB5956 H1 Ro.raw | 1.1241E6            | 3        | 3                       | 545   | 556 |                                              |                                                            | PEAKS DB  |
| R.I(+57.02)VQIEAKPNTLVLPK.H                    | N    | 68.01  | 1719.0294 | 15     | -3.7 | 860.5188  | 2 | 30.87 | 43       | F43:1547 | OB5956 H1 Ro.raw | 7.3731E5            | 5        | 4                       | 214   | 228 | Carbamidomethylation (DHKE, X@N-term):109.97 | I1:Carbamidomethylation (DHKE, X@N-term):109.97            | PEAKS PTM |
| R.RVLLEEN(+.98)AGGEQEER.G                      | N    | 67.83  | 1728.8278 | 15     | -0.8 | 577.2827  | 3 | 25.96 | 42       | F42:1233 | OB5955 H1 Ro.raw | 1.359E4             | 2        | 2                       | 334   | 348 | Deamidation (NQ)                             | N7:Deamidation (NQ):77.53                                  | PEAKS DB  |
| R.DQS(-18.01)SYLQGFNR.N                        | N    | 67.70  | 1268.5785 | 11     | 0.2  | 635.2966  | 2 | 30.91 | 41       | F41:1537 | OB5954 H1 Ro.raw | 6.4401E5            | 3        | 3                       | 308   | 318 | Dehydration                                  | S3:Dehydration:40.00                                       | PEAKS PTM |
| R.RVLLEENAGGEQEERQGR.R                         | N    | 67.67  | 2069.0249 | 18     | 1.9  | 690.6835  | 3 | 25.60 | 41       | F41:1205 | OB5954 H1 Ro.raw | 1.8247E6            | 3        | 3                       | 334   | 351 |                                              |                                                            | PEAKS DB  |
| K.Q(-17.03)AKDLAFPGSGEQVEK.L                   | N    | 67.52  | 1685.8260 | 16     | 0.1  | 843.9204  | 2 | 29.98 | 43       | F43:1503 | OB5956 H1 Ro.raw | 9.9003E4            | 3        | 3                       | 557   | 572 | Pyro-glu from Q                              | Q1:Pyro-glu from Q:1000.00                                 | PEAKS PTM |
| K.NPQLQ(+.98)DLDDMLTLC(+57.02)VEIK.E           | N    | 67.25  | 2047.9629 | 17     | 1.5  | 1024.9902 | 2 | 44.46 | 43       | F43:2348 | OB5956 H1 Ro.raw | 0                   | 0        | 0                       | 423   | 439 | Carbamidomethylation                         | Q5:Deamidation (NQ):19.68;C13:Carbamidomethylation:1000.00 | PEAKS DB  |
| R.WGPAGPR.E                                    | N    | 66.93  | 739.3765  | 7      | 1.0  | 370.6959  | 2 | 25.22 | 41       | F41:1191 | OB5954 H1 Ro.raw | 3.1676E5            | 3        | 3                       | 115   | 121 |                                              |                                                            | PEAKS DB  |
| K.SFNL(-18.01)EGHALR.I                         | N    | 66.88  | 1239.5996 | 11     | 2.9  | 620.8089  | 2 | 28.79 | 41       | F41:1400 | OB5954 H1 Ro.raw | 0                   | 0        | 0                       | 255   | 265 | Dehydration                                  | D5:Dehydration:49.79                                       | PEAKS PTM |
| K.AM(+15.99)VIVVVNK.G                          | N    | 66.42  | 987.5787  | 9      | 1.1  | 494.7972  | 2 | 27.11 | 41       | F41:1283 | OB5954 H1 Ro.raw | 1.8879E6            | 3        | 3                       | 452   | 460 | Oxidation (M)                                | M2:Oxidation (M):1000.00                                   | PEAKS DB  |
| total 250 peptides                             |      |        |           |        |      |           |   |       |          |          |                  |                     |          |                         |       |     |                                              |                                                            |           |

| Peptide                                           | Uniq | -10lgP | Mass      | Length | ppm  | m/z       | z | RT    | Fraction | Scan     | Source File       | Area Roasted in gel | #Feature | #Feature Roasted in gel | Start | End | PTM                                   | AScore                                                   | Found By  |
|---------------------------------------------------|------|--------|-----------|--------|------|-----------|---|-------|----------|----------|-------------------|---------------------|----------|-------------------------|-------|-----|---------------------------------------|----------------------------------------------------------|-----------|
| K.KNPQLQDLDMMLTCVEIK(+14.02).E                    | N    | 66.06  | 2132.0679 | 18     | -0.6 | 1067.0405 | 2 | 36.31 | 41       | F41:1858 | OB5954 H1 Ro.raw  | 5.2356E5            | 2        | 2                       | 422   | 439 | Methylation(KR)                       | K18:Methylation(KR):130.57                               | PEAKS PTM |
| R.EETSRNPNPFYFSPRR.F                              | N    | 65.61  | 1898.9023 | 15     | 1.8  | 633.9759  | 3 | 27.75 | 42       | F42:1339 | OB5955 H1 Ro.raw  | 8.693E5             | 4        | 4                       | 167   | 181 |                                       |                                                          | PEAKS DB  |
| K.NPQLQDLDMMLTC(+57.02)VEIKEGALM(+15.99)LPHFNSK.A | N    | 64.76  | 3387.6335 | 29     | -0.6 | 847.9152  | 4 | 37.63 | 43       | F43:1915 | OB5956 H1 Ro.raw  | 8.7706E7            | 6        | 6                       | 423   | 451 | Carbamidomethylation; Oxidation (M)   | C13:Carbamidomethylation:1000.00;M22:Oxidation (M):82.05 | PEAKS DB  |
| R.IPSGFISY(+125.90)ILNR.H                         | N    | 64.64  | 1504.6575 | 12     | -1.9 | 753.3346  | 2 | 38.39 | 43       | F43:2001 | OB5956 H1 Ro.raw  | 2.0334E5            | 2        | 2                       | 266   | 277 | Iodination                            | Y8:Iodination:1000.00                                    | PEAKS PTM |
| R.IPSGFISYILN(+.98)RHDNQNL.R.V                    | N    | 64.64  | 2257.1604 | 19     | 4.7  | 753.3976  | 3 | 34.29 | 42       | F42:1740 | OB5955 H1 Ro.raw  | 6.9901E5            | 2        | 2                       | 266   | 284 | Deamidation (NQ)                      | N11:Deamidation (NQ):36.24                               | PEAKS DB  |
| A.FPGSGEQVEK.L                                    | N    | 64.10  | 1076.5138 | 10     | -3.4 | 539.2623  | 2 | 30.29 | 42       | F42:1495 | OB5955 H1 Ro.raw  | 4.0412E5            | 3        | 3                       | 563   | 572 |                                       |                                                          | PEAKS DB  |
| R.SRQFQNLQNH.R.I                                  | N    | 63.98  | 1426.7178 | 11     | 0.3  | 476.5800  | 3 | 24.16 | 43       | F43:1148 | OB5956 H1 Ro.raw  | 5.7314E4            | 3        | 3                       | 203   | 213 |                                       |                                                          | PEAKS DB  |
| K.ISMPVNTPGQFEDFFPASSRDQSSYLQGFSR.N               | N    | 63.85  | 3494.6201 | 31     | -0.9 | 1165.8796 | 3 | 36.01 | 43       | F43:1851 | OB5956 H1 Ro.raw  | 5.8723E6            | 6        | 6                       | 288   | 318 |                                       |                                                          | PEAKS DB  |
| K.LFEVKPKDK.N                                     | N    | 63.79  | 1102.6385 | 9      | 0.6  | 552.3269  | 2 | 24.50 | 43       | F43:1159 | OB5956 H1 Ro.raw  | 1.1348E6            | 6        | 6                       | 414   | 422 |                                       |                                                          | PEAKS DB  |
| R.SSEN(+.98)NEGVIVK.V                             | Y    | 63.52  | 1175.5670 | 11     | 0.2  | 588.7909  | 2 | 24.46 | 41       | F41:1140 | OB5954 H1 Ro.raw  | 5.8916E4            | 4        | 4                       | 357   | 367 | Deamidation (NQ)                      | N4:Deamidation (NQ):33.98                                | PEAKS DB  |
| Q.SSYLQGFSR.N                                     | N    | 63.16  | 1043.5035 | 9      | 1.4  | 522.7598  | 2 | 29.29 | 41       | F41:1438 | OB5954 H1 Ro.raw  | 6.2708E4            | 3        | 3                       | 310   | 318 |                                       |                                                          | PEAKS DB  |
| R.QFQNLQN(+.98)HR.I                               | N    | 63.09  | 1184.5686 | 9      | 5.4  | 593.2948  | 2 | 23.60 | 43       | F43:1114 | OB5956 H1 Ro.raw  | 8.0412E2            | 1        | 1                       | 205   | 213 |                                       | N7:Deamidation (NQ):0.00                                 | PEAKS DB  |
| K.EGALMLPH(+14.02)FNSK.A                          | N    | 63.06  | 1356.6860 | 12     | -4.2 | 679.3475  | 2 | 30.85 | 43       | F43:1554 | OB5956 H1 Ro.raw  | 2.9707E5            | 3        | 3                       | 440   | 451 | Methylation(others)                   | H8:Methylation(others):65.81                             | PEAKS PTM |
| P.SGFISYILNR.H                                    | N    | 63.04  | 1168.6240 | 10     | 1.5  | 585.3202  | 2 | 35.08 | 43       | F43:1803 | OB5956 H1 Ro.raw  | 2.9962E5            | 1        | 1                       | 268   | 277 |                                       |                                                          | PEAKS DB  |
| N.LDEGHALR.I                                      | N    | 62.84  | 909.4668  | 8      | 0.0  | 455.7407  | 2 | 27.93 | 42       | F42:1350 | OB5955 H1 Ro.raw  | 1.8672E5            | 3        | 3                       | 258   | 265 |                                       |                                                          | PEAKS DB  |
| G.SEEEGDITNPINLREGEPDLSNNFGK.L                    | Y    | 62.76  | 2873.3315 | 26     | -0.4 | 958.7865  | 3 | 32.44 | 30       | F30:1400 | OB5926 H3B Ro.raw | 1.9904E4            | 1        | 1                       | 388   | 413 |                                       |                                                          | PEAKS DB  |
| K.A(+57.02)MVIVVVNKG TGNLELVAVRK.E                | N    | 62.52  | 2266.3196 | 21     | 0.7  | 1134.1678 | 2 | 32.98 | 42       | F42:1660 | OB5955 H1 Ro.raw  | 1.5099E7            | 6        | 6                       | 452   | 472 | Carbamidomethylation (DHKE, X@N-term) | A1:Carbamidomethylation (DHKE, X@N-term):139.69          | PEAKS PTM |
| K.HADADNILVIQQGQATVTVANGN(+.98)NRK.S              | N    | 62.31  | 2747.3950 | 26     | -0.1 | 916.8055  | 3 | 30.70 | 41       | F41:1517 | OB5954 H1 Ro.raw  | 8.5956E3            | 1        | 1                       | 229   | 254 |                                       | N23:Deamidation (NQ):9.40                                | PEAKS DB  |
| K.SFN(+15.99)LDEGHALR.I                           | N    | 62.00  | 1273.6051 | 11     | 0.0  | 637.8098  | 2 | 27.46 | 43       | F43:1330 | OB5956 H1 Ro.raw  | 9.622E5             | 3        | 3                       | 255   | 265 | Oxidation or Hydroxylation            | N3:Oxidation or Hydroxylation:55.92                      | PEAKS PTM |
| R.IP(+15.99)SGFISYILNR.H                          | N    | 61.98  | 1394.7557 | 12     | -0.8 | 698.3846  | 2 | 37.47 | 43       | F43:1932 | OB5956 H1 Ro.raw  | 3.2208E6            | 4        | 4                       | 266   | 277 | Oxidation or Hydroxylation            | P2:Oxidation or Hydroxylation:39.25                      | PEAKS PTM |
| total 250 peptides                                |      |        |           |        |      |           |   |       |          |          |                   |                     |          |                         |       |     |                                       |                                                          |           |



| Peptide                                                           | Uniq | -10lgP | Mass      | Length | ppm  | m/z      | z | RT    | Fraction | Scan     | Source File       | Area Roasted in gel | #Feature | #Feature Roasted in gel | Start | End | PTM                                     | AScore                                                                                                        | Found By  |
|-------------------------------------------------------------------|------|--------|-----------|--------|------|----------|---|-------|----------|----------|-------------------|---------------------|----------|-------------------------|-------|-----|-----------------------------------------|---------------------------------------------------------------------------------------------------------------|-----------|
| K.NPQLQDLDM(+15.99)LTC(+57.02)VEIKEGALM(+15.99)LPHFNSK.A          | N    | 61.19  | 3403.6284 | 29     | 0.3  | 851.9147 | 4 | 35.86 | 41       | F41:1801 | OB5954 H1 Ro.raw  | 3.4294E6            | 4        | 4                       | 423   | 451 | Oxidation (M); Carbamidomethylation     | M10:Oxidation (M):21.94;C13:Carbamidomethylation:1000.00;M22:Oxidation (M):61.50                              | PEAKS DB  |
| K.G(+57.02)TGNLELVAVRK.E                                          | N    | 60.73  | 1312.7462 | 12     | -0.4 | 657.3801 | 2 | 27.30 | 41       | F41:1303 | OB5954 H1 Ro.raw  | 3.6978E5            | 2        | 2                       | 461   | 472 | Carbamidomethylation (DHKE, X@N-term):5 | G1:Carbamidomethylation (DHKE, X@N-term):5                                                                    | PEAKS PTM |
| K.NPQLQDLDM(+15.99)M(+15.99)LTC(+57.02)VEIKEGALM(+15.99)LPHFNSK.A | N    | 60.17  | 3419.6233 | 29     | -0.9 | 855.9124 | 4 | 34.83 | 42       | F42:1766 | OB5955 H1 Ro.raw  | 1.2322E6            | 3        | 3                       | 423   | 451 | Oxidation (M); Carbamidomethylation     | M9:Oxidation (M):1000.00;M10:Oxidation (M):1000.00;C13:Carbamidomethylation:1000.00;M22:Oxidation (M):1000.00 | PEAKS DB  |
| R.IPSGFISY(+15.99)ILNR.H                                          | N    | 60.13  | 1394.7557 | 12     | -0.7 | 698.3846 | 2 | 35.11 | 41       | F41:1859 | OB5954 H1 Ro.raw  | 3.4529E6            | 5        | 5                       | 266   | 277 | Oxidation or Hydroxylation              | Y8:Oxidation or Hydroxylation:67.76                                                                           | PEAKS PTM |
| L.DEGHALR.I                                                       | N    | 59.61  | 796.3828  | 7      | 2.5  | 399.1996 | 2 | 27.93 | 42       | F42:1351 | OB5955 H1 Ro.raw  | 9.3538E4            | 3        | 3                       | 259   | 265 |                                         |                                                                                                               | PEAKS DB  |
| K.LFEVKPDKKNPQLQ(+.98)DLDM(+15.99)LTC(+57.02)VEIK.E               | N    | 59.38  | 3148.5857 | 26     | 7.4  | 788.1595 | 4 | 33.17 | 42       | F42:1670 | OB5955 H1 Ro.raw  | 3.9804E5            | 1        | 1                       | 414   | 439 | Oxidation (M); Carbamidomethylation     | Q14:Deamidation (NQ):0.00;M19:Oxidation (M):23.10;C22:Carbamidomethylation:1000.00                            | PEAKS DB  |
| R.VLLEEN(-17.03)AGGEQEER.G                                        | N    | 59.22  | 1554.7162 | 14     | 1.2  | 778.3663 | 2 | 27.73 | 42       | F42:1335 | OB5955 H1 Ro.raw  | 0                   | 0        | 0                       | 335   | 348 | Ammonia-loss (N)                        | N6:Ammonia-loss (N):1000.00                                                                                   | PEAKS PTM |
| K.SFNLDEGHALRIPSGFISYILNRHDNQNL.R.V                               | N    | 59.07  | 3495.7759 | 30     | 1.5  | 700.1635 | 5 | 39.97 | 40       | F40:1987 | OB5953 H3A Ro.raw | 2.0405E7            | 15       | 15                      | 255   | 284 |                                         |                                                                                                               | PEAKS DB  |
| K.GSE(+57.02)EEGDITNPINLR.E                                       | N    | 58.95  | 1699.8013 | 15     | -3.0 | 850.9054 | 2 | 30.85 | 43       | F43:1556 | OB5956 H1 Ro.raw  | 4.2816E4            | 1        | 1                       | 387   | 401 |                                         | E3:Carbamidomethylation (DHKE, X@N-term):0.00                                                                 | PEAKS PTM |
| K.SFNLDEGHALR(+31.99)IPSGFISYILNR.H                               | N    | 58.88  | 2650.3503 | 23     | 0.1  | 884.4575 | 3 | 39.14 | 42       | F42:2021 | OB5955 H1 Ro.raw  | 5.6519E5            | 1        | 1                       | 255   | 277 | Dihydroxy                               | R11:Dihydroxy:46.57                                                                                           | PEAKS PTM |
| K.LFEVKPDK.K                                                      | N    | 58.71  | 974.5436  | 8      | 1.7  | 488.2799 | 2 | 25.30 | 42       | F42:1183 | OB5955 H1 Ro.raw  | 1.7315E6            | 6        | 6                       | 414   | 421 |                                         |                                                                                                               | PEAKS DB  |
| K.SFNLDE(+57.02)GHALR.I                                           | N    | 58.62  | 1314.6316 | 11     | 0.3  | 658.3232 | 2 | 27.83 | 43       | F43:1458 | OB5956 H1 Ro.raw  | 2.3371E6            | 2        | 2                       | 255   | 265 | Carbamidomethylation (DHKE, X@N-term):2 | E6:Carbamidomethylation (DHKE, X@N-term):2                                                                    | PEAKS PTM |
| R.N(+57.02)NPFFPSRR.F                                             | N    | 58.56  | 1353.6577 | 10     | 1.1  | 677.8369 | 2 | 29.74 | 42       | F42:1453 | OB5955 H1 Ro.raw  | 9.24E5              | 3        | 3                       | 172   | 181 | Carbamidomethylation (DHKE, X@N-term)   | N1:Carbamidomethylation (DHKE, X@N-term)                                                                      | PEAKS PTM |
| total 250 peptides                                                |      |        |           |        |      |          |   |       |          |          |                   |                     |          |                         |       |     |                                         |                                                                                                               |           |

| Peptide                                       | Uniq | -10lgP | Mass      | Length | ppm  | m/z       | z | RT    | Fraction | Scan     | Source File       | Area Roasted in gel | #Feature | #Feature Roasted in gel | Start | End | PTM                                                    | AScore                                                                    | Found By  |
|-----------------------------------------------|------|--------|-----------|--------|------|-----------|---|-------|----------|----------|-------------------|---------------------|----------|-------------------------|-------|-----|--------------------------------------------------------|---------------------------------------------------------------------------|-----------|
|                                               |      |        |           |        |      |           |   |       |          |          |                   |                     |          |                         |       |     |                                                        | -term):1000.00                                                            |           |
| R.E(-18.01)GE(+57.02)QEWGTPGSHVR.E            | N    | 58.23  | 1606.7124 | 14     | 0.2  | 804.3636  | 2 | 27.56 | 42       | F42:1323 | OB5955 H1 Ro.raw  | 2.2302E5            | 3        | 3                       | 153   | 166 | Pyro-glu from E; Carbamidomethylation (DHKE, X@N-term) | E1:Pyro-glu from E:1000.00;E3:Carbamidomethylation (DHKE, X@N-term):60.92 | PEAKS PTM |
| R.IFLAGDKDNVIDQ(+.98)IEKQAK.D                 | N    | 58.20  | 2145.1316 | 19     | 1.4  | 716.0521  | 3 | 33.04 | 43       | F43:1686 | OB5956 H1 Ro.raw  | 1.2153E5            | 1        | 1                       | 541   | 559 | Deamidation (NQ)                                       | Q13:Deamidation (NQ):25.18                                                | PEAKS DB  |
| R.VAKISM(+15.99)PVNTPGQFEDFFPASSR.D           | N    | 57.67  | 2540.2368 | 23     | 2.1  | 847.7546  | 3 | 32.98 | 42       | F42:1665 | OB5955 H1 Ro.raw  | 1.5427E5            | 1        | 1                       | 285   | 307 | Oxidation (M)                                          | M6:Oxidation (M):1000.00                                                  | PEAKS DB  |
| K.G(+57.02)TGNLLEVAVR.K                       | N    | 57.51  | 1184.6514 | 11     | -2.7 | 593.3314  | 2 | 30.10 | 42       | F42:1486 | OB5955 H1 Ro.raw  | 1.7196E5            | 2        | 2                       | 461   | 471 |                                                        | G1:Carbamidomethylation (DHKE, X@N-term):19.78                            | PEAKS PTM |
| R.IFLAGD(+57.02)KDNVIDQIEK.Q                  | N    | 57.43  | 1873.9785 | 16     | 1.7  | 625.6678  | 3 | 32.52 | 41       | F41:1637 | OB5954 H1 Ro.raw  | 2.7943E5            | 3        | 3                       | 541   | 556 |                                                        | D6:Carbamidomethylation (DHKE, X@N-term):15.57                            | PEAKS PTM |
| R.IFLAGDK(+15.99)DNVIDQIEK.Q                  | N    | 57.39  | 1832.9519 | 16     | -1.9 | 917.4814  | 2 | 31.99 | 41       | F41:1600 | OB5954 H1 Ro.raw  | 7.5922E5            | 2        | 2                       | 541   | 556 |                                                        | K7:Oxidation or Hydroxylation:17.01                                       | PEAKS PTM |
| N.PFYFPSRR.F                                  | N    | 57.34  | 1068.5504 | 8      | 1.1  | 535.2831  | 2 | 28.95 | 41       | F41:1414 | OB5954 H1 Ro.raw  | 4.6082E6            | 5        | 5                       | 174   | 181 |                                                        |                                                                           | PEAKS DB  |
| R.K(+27.99)SFNLDEGHALR.I                      | N    | 57.29  | 1413.7001 | 12     | 1.4  | 707.8583  | 2 | 28.46 | 42       | F42:1387 | OB5955 H1 Ro.raw  | 2.9777E4            | 1        | 1                       | 254   | 265 | Formylation                                            | K1:Formylation:1000.00                                                    | PEAKS PTM |
| K.SVSKKGSEEEGDITNPINLR.E                      | N    | 57.26  | 2172.1023 | 20     | 0.9  | 725.0420  | 3 | 27.48 | 41       | F41:1325 | OB5954 H1 Ro.raw  | 1.6504E5            | 2        | 2                       | 382   | 401 |                                                        |                                                                           | PEAKS DB  |
| K.LFEVKPKKPNQLQDLDM(+15.99)MLTC(+57.02)VEIK.E | N    | 57.09  | 3147.6018 | 26     | -1.9 | 787.9062  | 4 | 34.20 | 41       | F41:1734 | OB5954 H1 Ro.raw  | 2.4894E6            | 4        | 4                       | 414   | 439 | Oxidation (M); Carbamidomethylation                    | M18:Oxidation (M):33.98;C22:Carbamidomethylation:1000.00                  | PEAKS DB  |
| K.IRPEGREGSEQEWGTPGSHVR.E                     | N    | 56.62  | 2276.1045 | 20     | 0.5  | 570.0337  | 4 | 27.56 | 42       | F42:1329 | OB5955 H1 Ro.raw  | 8.9716E4            | 2        | 2                       | 147   | 166 |                                                        |                                                                           | PEAKS DB  |
| K.SFNLDEGHALR(+31.99).I                       | N    | 55.96  | 1289.6000 | 11     | -1.4 | 645.8063  | 2 | 30.41 | 43       | F43:1520 | OB5956 H1 Ro.raw  | 0                   | 0        | 0                       | 255   | 265 | Dihydroxy                                              | R11:Dihydroxy:119.59                                                      | PEAKS PTM |
| K.ISMPVN(+.98)TPGQFEDFFPASSR.D                | N    | 55.55  | 2227.0254 | 20     | 6.6  | 1114.5273 | 2 | 36.77 | 41       | F41:1885 | OB5954 H1 Ro.raw  | 1.01E5              | 2        | 2                       | 288   | 307 | Deamidation (NQ)                                       | N6:Deamidation (NQ):42.68                                                 | PEAKS DB  |
| R.NTLEAAFAEFN(+.98)EIRR.V                     | N    | 54.77  | 1894.9172 | 16     | 1.8  | 948.4676  | 2 | 33.04 | 43       | F43:1685 | OB5956 H1 Ro.raw  | 2.2573E6            | 5        | 5                       | 319   | 334 | Deamidation (NQ)                                       | N12:Deamidation (NQ):39.02                                                | PEAKS DB  |
| K.S(+57.02)FNLDEGHALRIPSGFISYILNR.H           | N    | 54.19  | 2675.3818 | 23     | 2.3  | 892.8033  | 3 | 39.35 | 38       | F38:1901 | OB5951 H3A Ro.raw | 6.7035E5            | 1        | 1                       | 255   | 277 | Carbamidomethylation (DHKE, X@N-term)                  | S1:Carbamidomethylation (DHKE, X@N-term):63.97                            | PEAKS PTM |
| R.IFLAGDKDNVIDQIEK(+57.02)QAK.D               | N    | 54.07  | 2201.1692 | 19     | 0.3  | 734.7306  | 3 | 32.48 | 43       | F43:1657 | OB5956 H1 Ro.raw  | 1.2122E6            | 3        | 3                       | 541   | 559 |                                                        | K16:Carbamidomethylation (DHKE, X                                         | PEAKS PTM |
| total 250 peptides                            |      |        |           |        |      |           |   |       |          |          |                   |                     |          |                         |       |     |                                                        |                                                                           |           |

| Peptide                                                | Uniq | -10lgP | Mass      | Length | ppm  | m/z       | z | RT    | Fraction | Scan     | Source File       | Area Roasted in gel | #Feature | #Feature Roasted in gel | Start | End | PTM                                   | AScore                                                                                | Found By  |
|--------------------------------------------------------|------|--------|-----------|--------|------|-----------|---|-------|----------|----------|-------------------|---------------------|----------|-------------------------|-------|-----|---------------------------------------|---------------------------------------------------------------------------------------|-----------|
|                                                        |      |        |           |        |      |           |   |       |          |          |                   |                     |          |                         |       |     |                                       | @N-term):11.12                                                                        |           |
| R.I(+27.99)PSGFISYILNR.H                               | N    | 53.77  | 1406.7557 | 12     | 0.7  | 704.3856  | 2 | 42.27 | 42       | F42:2199 | OB5955 H1 Ro.raw  | 0                   | 0        | 0                       | 266   | 277 | Formylation                           | I1:Formylation:100.0.00                                                               | PEAKS PTM |
| R.IPSGFISYILNRHDN(+.98)QNLR.V                          | N    | 53.60  | 2257.1604 | 19     | -0.7 | 753.3936  | 3 | 34.26 | 41       | F41:1732 | OB5954 H1 Ro.raw  | 0                   | 0        | 0                       | 266   | 284 |                                       | N15:Deamidation (NQ):0.00                                                             | PEAKS DB  |
| K.HADADNILVIQQGQATVTVANGNNR.K                          | N    | 53.13  | 2618.3162 | 25     | 0.5  | 873.7798  | 3 | 30.34 | 38       | F38:1426 | OB5951 H3A Ro.raw | 1.8654E3            | 1        | 1                       | 229   | 253 |                                       |                                                                                       | PEAKS DB  |
| R.IVQIEAK(+57.02)PNTLVLPK.H                            | N    | 53.06  | 1719.0294 | 15     | -1.6 | 860.5206  | 2 | 30.29 | 43       | F43:1512 | OB5956 H1 Ro.raw  | 2.587E5             | 1        | 1                       | 214   | 228 | Carbamidomethylation (DHKE, X@N-term) | K7:Carbamidomethylation (D HKE, X@N-term):25.69                                       | PEAKS PTM |
| K.AM(+15.99)VIVVVNKG TGNLELVAVRK.E                     | N    | 52.95  | 2225.2930 | 21     | -1.3 | 742.7706  | 3 | 32.42 | 42       | F42:1596 | OB5955 H1 Ro.raw  | 1.4247E6            | 3        | 3                       | 452   | 472 | Oxidation (M)                         | M2:Oxidation (M):1000.00                                                              | PEAKS DB  |
| R.IVQIEAKPN.T                                          | N    | 52.62  | 1010.5760 | 9      | -0.3 | 506.2951  | 2 | 25.40 | 42       | F42:1199 | OB5955 H1 Ro.raw  | 0                   | 0        | 0                       | 214   | 222 |                                       |                                                                                       | PEAKS DB  |
| K.KNPQLQ(+.98)DLDMMLTC(+57.02)VEIKEGALMLPHFSK.A        | N    | 51.97  | 3500.7175 | 30     | 3.4  | 876.1896  | 4 | 36.93 | 43       | F43:1903 | OB5956 H1 Ro.raw  | 9.2646E6            | 2        | 2                       | 422   | 451 | Carbamidomethylation                  | Q6:Deamidation (NQ):14.04; C14:Carbamidomethylation:1000.00                           | PEAKS DB  |
| R.E(-18.01)GEQEWGTPGSHVR.E                             | N    | 51.90  | 1549.6909 | 14     | 0.7  | 775.8533  | 2 | 27.75 | 42       | F42:1342 | OB5955 H1 Ro.raw  | 3.4987E5            | 3        | 3                       | 153   | 166 | Pyro-glu from E                       | E1:Pyro-glu from E:1000.00                                                            | PEAKS PTM |
| R.IFLAGDKDNVID.Q                                       | N    | 51.22  | 1318.6769 | 12     | -0.9 | 660.3451  | 2 | 31.76 | 43       | F43:1606 | OB5956 H1 Ro.raw  | 1.1173E5            | 3        | 3                       | 541   | 552 |                                       |                                                                                       | PEAKS DB  |
| K.ISM(+15.99)PVNTPGQFEDFFPASSRDQSSYLQGFSR.N            | N    | 50.25  | 3510.6150 | 31     | 0.3  | 1171.2126 | 3 | 35.35 | 36       | F36:1707 | OB5948 H3B Ro.raw | 2.4799E6            | 5        | 5                       | 288   | 318 | Oxidation (M)                         | M3:Oxidation (M):1000.00                                                              | PEAKS DB  |
| K.NPQLQLDMM(+15.99)LTC(+57.02)VEIKEGALMLPHFN(+.98)SK.A | N    | 49.99  | 3388.6174 | 29     | 6.1  | 848.1668  | 4 | 36.39 | 43       | F43:1880 | OB5956 H1 Ro.raw  | 1.7975E6            | 1        | 1                       | 423   | 451 | Oxidation (M); Carbamidomethylation   | M10:Oxidation (M):27.96; C13:Carbamidomethylation:1000.00; N27:Deamidation (NQ):18.27 | PEAKS DB  |
| R.N(-17.03)NPFYFPSRR.F                                 | N    | 49.99  | 1279.6097 | 10     | 1.1  | 427.5443  | 3 | 28.89 | 43       | F43:1434 | OB5956 H1 Ro.raw  | 5.674E5             | 3        | 3                       | 172   | 181 |                                       | N1:Ammونيا-loss (N):9.34                                                              | PEAKS PTM |
| T.GNLELVAVRK.E                                         | N    | 49.53  | 1097.6556 | 10     | 0.5  | 549.8354  | 2 | 27.00 | 42       | F42:1296 | OB5955 H1 Ro.raw  | 3.4872E5            | 3        | 3                       | 463   | 472 |                                       |                                                                                       | PEAKS DB  |
| R.VAKIS(+77.99)MPVNTPGQFEDFFPASSR.D                    | N    | 49.16  | 2602.2290 | 23     | 3.0  | 1302.1257 | 2 | 38.06 | 42       | F42:1958 | OB5955 H1 Ro.raw  | 0                   | 0        | 0                       | 285   | 307 | Methylphosphorylation                 | S5:Methylphosphorylation:56.99                                                        | PEAKS PTM |
| F.PGSGEQVEK.L                                          | N    | 49.06  | 929.4454  | 9      | -3.7 | 465.7282  | 2 | 30.34 | 43       | F43:1524 | OB5956 H1 Ro.raw  | 5.2705E4            | 1        | 1                       | 564   | 572 |                                       |                                                                                       | PEAKS DB  |
| K.AMVIVVVNK(+57.02)GTGNLELVAVRK.E                      | N    | 48.92  | 2266.3196 | 21     | 1.3  | 756.4481  | 3 | 33.23 | 43       | F43:1673 | OB5956 H1 Ro.raw  | 3.1193E6            | 1        | 1                       | 452   | 472 |                                       | K9:Carbamidomethylation (D HKE, X@N-term):8.78                                        | PEAKS PTM |
| R.EEDWRQPR.E                                           | N    | 48.87  | 1114.5155 | 8      | 1.8  | 558.2661  | 2 | 23.91 | 41       | F41:1112 | OB5954 H1 Ro.raw  | 1.6791E3            | 1        | 1                       | 126   | 133 |                                       |                                                                                       | PEAKS DB  |
| total 250 peptides                                     |      |        |           |        |      |           |   |       |          |          |                   |                     |          |                         |       |     |                                       |                                                                                       |           |

| Peptide                                                   | Uniq | -10lgP | Mass      | Length | ppm  | m/z       | z | RT    | Fraction | Scan     | Source File       | Area Roasted in gel | #Feature | #Feature Roasted in gel | Start | End | PTM                                       | AScore                                                                          | Found By  |
|-----------------------------------------------------------|------|--------|-----------|--------|------|-----------|---|-------|----------|----------|-------------------|---------------------|----------|-------------------------|-------|-----|-------------------------------------------|---------------------------------------------------------------------------------|-----------|
| K.PNTLVLPK.H                                              | N    | 48.84  | 880.5382  | 8      | -2.9 | 441.2751  | 2 | 28.00 | 43       | F43:1374 | OB5956 H1 Ro.raw  | 1.9234E5            | 2        | 2                       | 221   | 228 |                                           |                                                                                 | PEAKS DB  |
| L.R(+27.99)IPSGFISYILNR.H                                 | N    | 48.25  | 1562.8568 | 13     | -2.0 | 782.4341  | 2 | 37.84 | 43       | F43:1976 | OB5956 H1 Ro.raw  | 1.5108E5            | 1        | 1                       | 265   | 277 | Formylation                               | R1:Formylation:100.0.00                                                         | PEAKS PTM |
| R.EGEQEW(+15.99)GTPGSHVR.E                                | N    | 47.73  | 1583.6964 | 14     | -0.6 | 792.8550  | 2 | 25.22 | 41       | F41:1196 | OB5954 H1 Ro.raw  | 2.0714E4            | 1        | 1                       | 153   | 166 | Oxidation (HW)                            | W6:Oxidation (HW):72.73                                                         | PEAKS PTM |
| V.QIEAKPNTLVLPK.H                                         | N    | 47.49  | 1449.8555 | 13     | -3.8 | 725.9323  | 2 | 30.34 | 43       | F43:1513 | OB5956 H1 Ro.raw  | 4.7367E4            | 1        | 1                       | 216   | 228 |                                           |                                                                                 | PEAKS DB  |
| K.GSEEEGDITNPINLREGEPLDLSN(+.98)N(+.98)FGK.L              | Y    | 47.23  | 2932.3210 | 27     | 4.0  | 978.4515  | 3 | 32.30 | 43       | F43:1637 | OB5956 H1 Ro.raw  | 3.6476E5            | 1        | 1                       | 387   | 413 | Deamidation (NQ)                          | N23:Deamidation (NQ):55.39;N24:Deamidation (NQ):48.34                           | PEAKS DB  |
| R.N(+.98)TLEAAFNAEFNEIR.R                                 | N    | 46.63  | 1738.8162 | 15     | 9.2  | 870.4233  | 2 | 44.36 | 42       | F42:2303 | OB5955 H1 Ro.raw  | 5.4416E3            | 1        | 1                       | 319   | 333 | Deamidation (NQ)                          | N1:Deamidation (NQ):39.47                                                       | PEAKS DB  |
| R.VLLE(+21.98)ENAGGEQEER.G                                | N    | 46.37  | 1593.7246 | 14     | -1.1 | 797.8687  | 2 | 26.71 | 43       | F43:1300 | OB5956 H1 Ro.raw  | 4.0134E5            | 3        | 3                       | 335   | 348 | Sodium adduct                             | E4:Sodium adduct:40.00                                                          | PEAKS PTM |
| N.PFYFPSR.R                                               | N    | 46.32  | 912.4493  | 7      | -0.1 | 457.2319  | 2 | 31.70 | 42       | F42:1584 | OB5955 H1 Ro.raw  | 2.4653E5            | 4        | 4                       | 174   | 180 |                                           |                                                                                 | PEAKS DB  |
| K.GTGNLELVAVRKEQQQR.G                                     | N    | 46.31  | 1925.0442 | 17     | 1.4  | 642.6896  | 3 | 26.67 | 43       | F43:1294 | OB5956 H1 Ro.raw  | 2.1018E4            | 1        | 1                       | 461   | 477 |                                           |                                                                                 | PEAKS DB  |
| K.NPQLQLD(+14.02)MMLTC(+57.02)VEIK.E                      | N    | 45.99  | 2060.9944 | 17     | 0.2  | 1031.5046 | 2 | 37.33 | 41       | F41:1934 | OB5954 H1 Ro.raw  | 2.7407E4            | 1        | 1                       | 423   | 439 | Methylation(others); Carbamidomethylation | D8:Methylation(others):42.68; C13:Carbamidomethylation:1000.00                  | PEAKS PTM |
| K.VSKEH(+15.99)VEELTK.H                                   | N    | 45.89  | 1313.6826 | 11     | 0.8  | 657.8491  | 2 | 24.35 | 43       | F43:1164 | OB5956 H1 Ro.raw  | 1.7904E4            | 3        | 3                       | 368   | 378 | Oxidation (HW)                            | H5:Oxidation (HW):1000.00                                                       | PEAKS PTM |
| R.SSENNEGVIVKVSKEHVEELTK.H                                | Y    | 45.89  | 2454.2603 | 22     | 1.5  | 819.0952  | 3 | 30.81 | 39       | F39:1445 | OB5952 H3A Ro.raw | 1.1749E4            | 1        | 1                       | 357   | 378 |                                           |                                                                                 | PEAKS DB  |
| K.GTGNLE(+57.02)LVAVRK.E                                  | N    | 45.75  | 1312.7462 | 12     | -0.8 | 657.3799  | 2 | 27.17 | 42       | F42:1295 | OB5955 H1 Ro.raw  | 1.9882E5            | 1        | 1                       | 461   | 472 |                                           | E6:Carbamidomethylation (DHKE, X@N-term):0.00                                   | PEAKS PTM |
| K.A(+43.01)MVIVVVKGTGNLELVAVR.K                           | N    | 45.64  | 2124.2090 | 20     | 0.7  | 1063.1125 | 2 | 33.65 | 41       | F41:1688 | OB5954 H1 Ro.raw  | 8.0739E4            | 1        | 1                       | 452   | 471 | Carbamylation                             | A1:Carbamylation:161.20                                                         | PEAKS PTM |
| R.VLLEEN(+.98)AGGEQEERGQR.R                               | N    | 45.60  | 1913.9078 | 17     | -1.6 | 638.9755  | 3 | 25.99 | 41       | F41:1234 | OB5954 H1 Ro.raw  | 0                   | 0        | 0                       | 335   | 351 | Deamidation (NQ)                          | N6:Deamidation (NQ):28.79                                                       | PEAKS DB  |
| K.KNPQLQLDMM(+15.99)LTC(+57.02)VEIKEGALM(+15.99)LPHFNSK.A | N    | 45.45  | 3531.7234 | 30     | -1.1 | 883.9372  | 4 | 35.80 | 42       | F42:1822 | OB5955 H1 Ro.raw  | 0                   | 0        | 0                       | 422   | 451 | Carbamidomethylation; Oxidation (M)       | M11:Oxidation (M):0.00;C14:Carbamidomethylation:1000.00;M23:Oxidation (M):45.87 | PEAKS DB  |
| K.LFEVKPKKNPQLQLDLM(+15.99)M(+15.99)LTC(+57.02)VEIK.E     | N    | 45.43  | 3163.5967 | 26     | -2.8 | 791.9042  | 4 | 32.90 | 41       | F41:1650 | OB5954 H1 Ro.raw  | 2.0535E6            | 3        | 3                       | 414   | 439 | Oxidation (M); Carbamidomethylation       | M18:Oxidation (M):1000.00; M19:Oxidation (M):1000.00; C22:Carb                  | PEAKS DB  |
| total 250 peptides                                        |      |        |           |        |      |           |   |       |          |          |                   |                     |          |                         |       |     |                                           |                                                                                 |           |

| Peptide                                                        | Uniq | -10lgP | Mass      | Length | ppm  | m/z       | z | RT    | Fraction | Scan     | Source File      | Area Roasted in gel | #Feature | #Feature Roasted in gel | Start | End | PTM                                                   | AScore                                                                                                     | Found By  |
|----------------------------------------------------------------|------|--------|-----------|--------|------|-----------|---|-------|----------|----------|------------------|---------------------|----------|-------------------------|-------|-----|-------------------------------------------------------|------------------------------------------------------------------------------------------------------------|-----------|
|                                                                |      |        |           |        |      |           |   |       |          |          |                  |                     |          |                         |       |     |                                                       | amidomethylation:1000.00                                                                                   |           |
| R.KSFNLDEGH(+15.99)ALR.I                                       | N    | 45.40  | 1401.7001 | 12     | 3.9  | 701.8600  | 2 | 27.64 | 43       | F43:1349 | OB5956 H1 Ro.raw | 6.6479E4            | 2        | 2                       | 254   | 265 | Oxidation (HW)                                        | H9:Oxidation (HW):1000.00                                                                                  | PEAKS PTM |
| K.KNPQLQDLDM(+15.99)MLTC(+57.02)VEIKEGALMLPHFNSK.A             | N    | 44.60  | 3515.7285 | 30     | -1.9 | 879.9377  | 4 | 35.30 | 41       | F41:1798 | OB5954 H1 Ro.raw | 6.4162E5            | 1        | 1                       | 422   | 451 | Carbamidomethylation                                  | M10:Oxidation (M):14.02;C14:Carbamidomethylation:1000.00                                                   | PEAKS DB  |
| R.DQSSYLQGFSR(+15.99).N                                        | N    | 44.15  | 1302.5840 | 11     | 2.5  | 652.3009  | 2 | 30.79 | 43       | F43:1544 | OB5956 H1 Ro.raw | 1.4308E5            | 3        | 3                       | 308   | 318 | Oxidation or Hydroxylation                            | R11:Oxidation or Hydroxylation:42.88                                                                       | PEAKS PTM |
| R.Q(+.98)FQNLQNH.R.I                                           | N    | 43.70  | 1184.5686 | 9      | 4.6  | 593.2943  | 2 | 23.68 | 42       | F42:1098 | OB5955 H1 Ro.raw | 0                   | 0        | 0                       | 205   | 213 | Deamidation (NQ)                                      | Q1:Deamidation (NQ):39.25                                                                                  | PEAKS DB  |
| K.I(+57.02)SMPVNTPGQFEDFFPASSR.D                               | N    | 42.37  | 2283.0630 | 20     | -0.7 | 1142.5380 | 2 | 36.01 | 43       | F43:1860 | OB5956 H1 Ro.raw | 1.8515E5            | 1        | 1                       | 288   | 307 | Carbamidomethylation (DHKE, X@N-term):50.99           | I1:Carbamidomethylation (DHKE, X@N-term):50.99                                                             | PEAKS PTM |
| K.ISM(-48.00)PVNTPGQFEDFFPASSR.D                               | N    | 42.09  | 2178.0381 | 20     | 2.8  | 727.0220  | 3 | 32.48 | 43       | F43:1652 | OB5956 H1 Ro.raw | 5.8583E6            | 3        | 3                       | 288   | 307 | Dethiomethyl                                          | M3:Dethiomethyl:1000.00                                                                                    | PEAKS PTM |
| K.NPQLQDLDM(+15.99)LTC(+57.02)VEIKEGALM(+15.99)LPHFN(+.98)SK.A | N    | 41.25  | 3404.6125 | 29     | -0.4 | 1135.8777 | 3 | 36.69 | 42       | F42:1878 | OB5955 H1 Ro.raw | 3.8423E5            | 1        | 1                       | 423   | 451 | Carbamidomethylation; Oxidation (M); Deamidation (NQ) | M10:Oxidation (M):0.00;C13:Carbamidomethylation:1000.00;M22:Oxidation (M):39.23;N27:Deamidation (NQ):69.52 | PEAKS DB  |
| K.DLAFP(+15.99)GSGEQVEK.L                                      | N    | 41.14  | 1391.6569 | 13     | 0.5  | 696.8361  | 2 | 29.36 | 42       | F42:1432 | OB5955 H1 Ro.raw | 7.4528E5            | 3        | 3                       | 560   | 572 | Oxidation or Hydroxylation                            | P5:Oxidation or Hydroxylation:67.76                                                                        | PEAKS PTM |
| K.AMVIVVVN(+.98)KGTGNLVLAVRK.E                                 | N    | 41.03  | 2210.2820 | 21     | 1.9  | 1106.1504 | 2 | 34.35 | 42       | F42:1720 | OB5955 H1 Ro.raw | 4.5718E5            | 1        | 1                       | 452   | 472 | Deamidation (NQ)                                      | N8:Deamidation (NQ):28.79                                                                                  | PEAKS DB  |
| K.EGALM(-48.00)LPHFNSK.A                                       | N    | 40.53  | 1294.6670 | 12     | 0.5  | 432.5632  | 3 | 28.76 | 41       | F41:1389 | OB5954 H1 Ro.raw | 2.208E6             | 2        | 2                       | 440   | 451 | Dethiomethyl                                          | M5:Dethiomethyl:1000.00                                                                                    | PEAKS PTM |
| R.IVQ(+.98)IEAKPNTLVLPK.H                                      | N    | 40.35  | 1662.9919 | 15     | 8.1  | 832.5100  | 2 | 30.29 | 42       | F42:1514 | OB5955 H1 Ro.raw | 3.5627E6            | 1        | 1                       | 214   | 228 | Deamidation (NQ)                                      | Q3:Deamidation (NQ):22.65                                                                                  | PEAKS DB  |
| R.VLLEENAGGEQEERGQRR.W                                         | N    | 40.17  | 2069.0249 | 18     | 1.0  | 518.2640  | 4 | 25.49 | 42       | F42:1205 | OB5955 H1 Ro.raw | 2.0305E5            | 2        | 2                       | 335   | 352 |                                                       |                                                                                                            | PEAKS DB  |
| R.VLLEENAGGEQEER(+15.99).G                                     | N    | 39.98  | 1587.7375 | 14     | 1.8  | 794.8775  | 2 | 26.70 | 41       | F41:1275 | OB5954 H1 Ro.raw | 0                   | 0        | 0                       | 335   | 348 | Oxidation or Hydroxylation                            | R14:Oxidation or Hydroxylation:20.88                                                                       | PEAKS PTM |
| R.N(+27.99)TLEAAFNAEFNEIRR.V                                   | N    | 39.68  | 1921.9282 | 16     | -1.7 | 961.9697  | 2 | 37.51 | 41       | F41:1908 | OB5954 H1 Ro.raw | 3.7767E4            | 1        | 1                       | 319   | 334 | Formylation                                           | N1:Formylation:1000.00                                                                                     | PEAKS PTM |
| K.E(-18.01)GALM(+15.99)LPHFNSK.A                               | N    | 39.64  | 1340.6547 | 12     | 0.2  | 447.8923  | 3 | 30.21 | 41       | F41:1479 | OB5954 H1 Ro.raw | 7.81E5              | 1        | 1                       | 440   | 451 | Pyro-glu from E; Oxidation (M)                        | E1:Pyro-glu from E:1000.00; M5:Oxidation (M):1000.00                                                       | PEAKS PTM |
| total 250 peptides                                             |      |        |           |        |      |           |   |       |          |          |                  |                     |          |                         |       |     |                                                       |                                                                                                            |           |

| Peptide                                                          | Uniq | -10lgP | Mass      | Length | ppm  | m/z       | z | RT    | Fraction | Scan     | Source File       | Area Roasted in gel | #Feature | #Feature Roasted in gel | Start | End | PTM                                    | AScore                                                                                                     | Found By  |
|------------------------------------------------------------------|------|--------|-----------|--------|------|-----------|---|-------|----------|----------|-------------------|---------------------|----------|-------------------------|-------|-----|----------------------------------------|------------------------------------------------------------------------------------------------------------|-----------|
| R.VLLEE(+53.92)NAGGEQEER.G                                       | N    | 39.58  | 1625.6620 | 14     | -1.0 | 542.8940  | 3 | 26.76 | 42       | F42:1278 | OB5955 H1 Ro.raw  | 0                   | 0        | 0                       | 335   | 348 | Replacement of 2 protons by iron       | E5:Replacement of 2 protons by iron:20.92                                                                  | PEAKS PTM |
| K.HADADNILVIQQGQ(+.98)ATVTVANGNNRK.S                             | N    | 39.33  | 2747.3950 | 26     | 2.6  | 916.8103  | 3 | 30.46 | 30       | F30:1280 | OB5926 H3B Ro.raw | 0                   | 0        | 0                       | 229   | 254 |                                        | Q14:Deamidation (NQ):5.07                                                                                  | PEAKS DB  |
| K.NPQLQ(+.98)DLDDMM(+15.99)LTC(+57.02)VEIKEGALM(+15.99)LPHFNSK.A | N    | 39.15  | 3404.6125 | 29     | -1.8 | 852.1589  | 4 | 38.22 | 43       | F43:1993 | OB5956 H1 Ro.raw  | 7.6266E5            | 1        | 1                       | 423   | 451 | Deamidation (NQ); Carbamidomethylation | Q5:Deamidation (NQ):49.79; M10:Oxidation (M):0.00;C13:Carbamidomethylation:1000.00;M22:Oxidation (M):14.60 | PEAKS DB  |
| K.N(+.98)PQLQDLDM(+15.99)MLTC(+57.02)VEIKEGALMLPHFNSK.A          | N    | 38.83  | 3388.6174 | 29     | 8.2  | 1695.3300 | 2 | 37.72 | 41       | F41:1941 | OB5954 H1 Ro.raw  | 6.4698E5            | 1        | 1                       | 423   | 451 | Carbamidomethylation                   | N1:Deamidation (NQ):0.00;M9:Oxidation (M):0.00;C13:Carbamidomethylation:1000.00                            | PEAKS DB  |
| K.D(+15.99)LAFPGSGEQVEK.L                                        | N    | 38.81  | 1391.6569 | 13     | 0.5  | 696.8361  | 2 | 29.36 | 42       | F42:1368 | OB5955 H1 Ro.raw  | 2.5725E5            | 1        | 1                       | 560   | 572 | Oxidation or Hydroxylation             | D1:Oxidation or Hydroxylation:77.13                                                                        | PEAKS PTM |
| K.NPQ(+.98)LQDLDDMLTC(+57.02)VEIK.E                              | N    | 38.70  | 2047.9629 | 17     | 2.9  | 1024.9917 | 2 | 46.45 | 41       | F41:2441 | OB5954 H1 Ro.raw  | 0                   | 0        | 0                       | 423   | 439 | Carbamidomethylation                   | Q3:Deamidation (NQ):14.04; C13:Carbamidomethylation:1000.00                                                | PEAKS DB  |
| R.IFLAGD(+15.99)KDNVIDQIEK.Q                                     | N    | 38.52  | 1832.9519 | 16     | 1.9  | 917.4850  | 2 | 31.89 | 42       | F42:1590 | OB5955 H1 Ro.raw  | 4.6198E5            | 1        | 1                       | 541   | 556 |                                        | D6:Oxidation or Hydroxylation:12.60                                                                        | PEAKS PTM |
| R.IFLAGDKDN(+.98)VIDQIEKQ(+.98)AK.D                              | N    | 37.85  | 2146.1157 | 19     | 9.8  | 716.3862  | 3 | 32.98 | 42       | F42:1661 | OB5955 H1 Ro.raw  | 8.6625E4            | 1        | 1                       | 541   | 559 |                                        | N9:Deamidation (NQ):13.83; Q17:Deamidation (NQ):17.65                                                      | PEAKS DB  |
| K.DLAFPGSGE(+53.92)QVEK.L                                        | N    | 37.31  | 1429.5812 | 13     | -6.3 | 715.7933  | 2 | 30.34 | 43       | F43:1518 | OB5956 H1 Ro.raw  | 2.6492E5            | 1        | 1                       | 560   | 572 | Replacement of 2 protons by iron       | E9:Replacement of 2 protons by iron:37.54                                                                  | PEAKS PTM |
| K.GT(-18.01)GNLELVAVRK.E                                         | N    | 36.73  | 1237.7142 | 12     | 2.6  | 413.5797  | 3 | 27.00 | 42       | F42:1287 | OB5955 H1 Ro.raw  | 4.7714E5            | 1        | 1                       | 461   | 472 | Dehydration                            | T2:Dehydration:100.00                                                                                      | PEAKS PTM |
| R.NT(-18.01)LEAAFAEFNEIRR.V                                      | N    | 36.45  | 1875.9227 | 16     | 0.7  | 626.3153  | 3 | 34.16 | 43       | F43:1739 | OB5956 H1 Ro.raw  | 6.9172E6            | 2        | 2                       | 319   | 334 | Dehydration                            | T2:Dehydration:100.00                                                                                      | PEAKS PTM |
| K.EGALM(+15.99)LPHFN(+.98)SK.A                                   | N    | 36.41  | 1359.6493 | 12     | 2.8  | 680.8338  | 2 | 31.22 | 41       | F41:1550 | OB5954 H1 Ro.raw  | 0                   | 0        | 0                       | 440   | 451 | Oxidation (M); Deamidation (NQ)        | M5:Oxidation (M):1000.00;N10:Deamidation (NQ):1000.00                                                      | PEAKS DB  |
| R.GRREEEEDDEEEEGSNR.E                                            | Y    | 36.40  | 2192.8689 | 18     | 0.0  | 731.9636  | 3 | 23.90 | 41       | F41:1110 | OB5954 H1 Ro.raw  | 1.2738E4            | 2        | 2                       | 478   | 495 |                                        |                                                                                                            | PEAKS DB  |
| total 250 peptides                                               |      |        |           |        |      |           |   |       |          |          |                   |                     |          |                         |       |     |                                        |                                                                                                            |           |

| Peptide                                                 | Uniq | -10lgP | Mass      | Length | ppm  | m/z      | z | RT    | Fraction | Scan     | Source File      | Area Roasted in gel | #Feature | #Feature Roasted in gel | Start | End | PTM                               | AScore                                                                                                        | Found By  |
|---------------------------------------------------------|------|--------|-----------|--------|------|----------|---|-------|----------|----------|------------------|---------------------|----------|-------------------------|-------|-----|-----------------------------------|---------------------------------------------------------------------------------------------------------------|-----------|
| R.DQSSY(-18.01)LQGFSR.N                                 | N    | 36.32  | 1268.5785 | 11     | -0.6 | 635.2961 | 2 | 30.85 | 43       | F43:1579 | OB5956 H1 Ro.raw | 2.378E5             | 1        | 1                       | 308   | 318 |                                   | Y5:Dehydration:0.00                                                                                           | PEAKS PTM |
| R.C(+57.02)LQS(-18.01)C(+57.02)Q(+.98)QEPDDLKQK.A       | N    | 36.24  | 1858.8190 | 15     | -0.1 | 930.4167 | 2 | 28.47 | 31       | F31:1350 | OB5942 H6 Ro.raw | 0                   | 0        | 0                       | 42    | 56  | Carbamidomethylation; Dehydration | C1:Carbamidomethylation:1000.00;S4:Dehydration:39.55;C5:Carbamidomethylation:1000.00;Q6:Deamidation (NQ):8.69 | PEAKS PTM |
| M.LPHFNSK.A                                             | N    | 36.02  | 841.4446  | 7      | 1.3  | 421.7301 | 2 | 30.63 | 42       | F42:1510 | OB5955 H1 Ro.raw | 1.4673E6            | 2        | 2                       | 445   | 451 |                                   |                                                                                                               | PEAKS DB  |
| E.PDLSNNFGK.L                                           | Y    | 35.93  | 990.4771  | 9      | -1.0 | 496.2453 | 2 | 28.09 | 42       | F42:1365 | OB5955 H1 Ro.raw | 3.4068E4            | 1        | 1                       | 405   | 413 |                                   |                                                                                                               | PEAKS DB  |
| K.NPQLQLDM(-48.00)MLTC(+57.02)VEIK.E                    | N    | 35.81  | 1998.9755 | 17     | 6.7  | 667.3369 | 3 | 34.52 | 43       | F43:1773 | OB5956 H1 Ro.raw | 8.4276E5            | 1        | 1                       | 423   | 439 | Carbamidomethylation              | M9:Dethiomethyl:11.06;C13:Carbamidomethylation:1000.00                                                        | PEAKS PTM |
| K.SF(+17.99)NLDEGHALR.I                                 | N    | 34.75  | 1275.6007 | 11     | 8.1  | 638.8128 | 2 | 26.62 | 42       | F42:1267 | OB5955 H1 Ro.raw | 9.5828E3            | 1        | 1                       | 255   | 265 | Fluorination                      | F2:Fluorination:1000.00                                                                                       | PEAKS PTM |
| K.KNPQLQ(+.98)DLDM(+15.99)LTC(+57.02)VEIKEGALMLPHFNSK.A | N    | 33.72  | 3516.7124 | 30     | 3.3  | 880.1883 | 4 | 35.48 | 41       | F41:1798 | OB5954 H1 Ro.raw | 7.5658E5            | 1        | 1                       | 422   | 451 | Carbamidomethylation              | Q6:Deamidation (NQ):18.55;M11:Oxidation (M):14.02;C14:Carbamidomethylation:1000.00                            | PEAKS DB  |
| D.QSSYLQGFGR.N                                          | N    | 33.26  | 1171.5621 | 10     | 2.1  | 586.7896 | 2 | 29.36 | 42       | F42:1431 | OB5955 H1 Ro.raw | 3.3134E4            | 1        | 1                       | 309   | 318 |                                   |                                                                                                               | PEAKS DB  |
| R.IVQIEAKP(+15.99)NTLVLPK.H                             | N    | 33.15  | 1678.0028 | 15     | -0.7 | 840.0081 | 2 | 30.35 | 41       | F41:1495 | OB5954 H1 Ro.raw | 0                   | 0        | 0                       | 214   | 228 |                                   | P8:Oxidation or Hydroxylation:9.34                                                                            | PEAKS PTM |
| R.IFLAGDKDNVID(-18.01)QIEK.Q                            | N    | 33.09  | 1798.9464 | 16     | 0.7  | 900.4811 | 2 | 31.39 | 43       | F43:1591 | OB5956 H1 Ro.raw | 6.7846E4            | 1        | 1                       | 541   | 556 |                                   | D12:Dehydration:13.16                                                                                         | PEAKS PTM |
| R.EREEDWRQPR.E                                          | N    | 32.92  | 1399.6592 | 10     | 5.7  | 700.8409 | 2 | 24.05 | 43       | F43:1141 | OB5956 H1 Ro.raw | 4.1173E4            | 1        | 1                       | 124   | 133 |                                   |                                                                                                               | PEAKS DB  |
| D.NVIDQIEK.Q                                            | N    | 32.64  | 957.5131  | 8      | 1.6  | 479.7646 | 2 | 28.19 | 42       | F42:1367 | OB5955 H1 Ro.raw | 3.0062E3            | 1        | 1                       | 549   | 556 |                                   |                                                                                                               | PEAKS DB  |
| K.AM(-48.00)VIVVVNK.G                                   | N    | 32.49  | 923.5804  | 9      | 0.0  | 462.7975 | 2 | 25.00 | 43       | F43:1192 | OB5956 H1 Ro.raw | 6.3177E3            | 1        | 1                       | 452   | 460 | Dethiomethyl                      | M2:Dethiomethyl:1000.00                                                                                       | PEAKS PTM |
| R.D(-18.01)QSSYLQGFGR.N                                 | N    | 31.95  | 1268.5785 | 11     | 1.6  | 635.2975 | 2 | 29.92 | 43       | F43:1489 | OB5956 H1 Ro.raw | 0                   | 0        | 0                       | 308   | 318 |                                   | D1:Dehydration:0.00                                                                                           | PEAKS PTM |
| R.IFLAGDKD(-18.01)NVIDQIEK.Q                            | N    | 31.82  | 1798.9464 | 16     | -0.9 | 600.6555 | 3 | 32.15 | 43       | F43:1589 | OB5956 H1 Ro.raw | 3.5634E5            | 1        | 1                       | 541   | 556 | Dehydration                       | D8:Dehydration:30.83                                                                                          | PEAKS PTM |
| K.D(+53.92)LAFIGSGEQVEK.L                               | N    | 31.27  | 1429.5812 | 13     | -4.3 | 715.7948 | 2 | 30.56 | 41       | F41:1500 | OB5954 H1 Ro.raw | 3.7719E5            | 1        | 1                       | 560   | 572 |                                   | D1:Replacement of 2 protons by iron:0.00                                                                      | PEAKS PTM |
| total 250 peptides                                      |      |        |           |        |      |          |   |       |          |          |                  |                     |          |                         |       |     |                                   |                                                                                                               |           |

| Peptide                                                       | Uniq | -10lgP | Mass      | Length | ppm  | m/z       | z | RT    | Fraction | Scan     | Source File       | Area Roasted in gel | #Feature | #Feature Roasted in gel | Start | End | PTM                                 | AScore                                                                 | Found By  |
|---------------------------------------------------------------|------|--------|-----------|--------|------|-----------|---|-------|----------|----------|-------------------|---------------------|----------|-------------------------|-------|-----|-------------------------------------|------------------------------------------------------------------------|-----------|
| K.SFNLDE(+53.92)GHALR.I                                       | N    | 31.27  | 1311.5294 | 11     | 1.0  | 438.1842  | 3 | 28.04 | 41       | F41:1362 | OB5954 H1 Ro.raw  | 5.8053E4            | 1        | 1                       | 255   | 265 |                                     | E6:Replacement of 2 protons by iron:16.90                              | PEAKS PTM |
| K.KGSEEEGDITNPINLREGEPLDSN(+.98)NFGK.L                        | Y    | 31.18  | 3059.4319 | 28     | 2.8  | 765.8674  | 4 | 31.36 | 36       | F36:1485 | OB5948 H3B Ro.raw | 0                   | 0        | 0                       | 386   | 413 |                                     | N24:Deamidation (NQ):0.00                                              | PEAKS DB  |
| K.AM(+15.99)VIVVVNK(+57.02)GTGNLELVAVR.K                      | N    | 30.97  | 2154.2195 | 20     | 2.8  | 1078.1200 | 2 | 32.98 | 42       | F42:1664 | OB5955 H1 Ro.raw  | 2.0029E5            | 1        | 1                       | 452   | 471 | Oxidation (M)                       | M2:Oxidation (M):1000.00;K9:Carbamidomethylation (DHKE, X@N-term):0.00 | PEAKS PTM |
| K.KNPQLQDLDMM(+15.99)LTC(+57.02)VEIKEGALMLPHFNSK.A            | N    | 30.83  | 3515.7285 | 30     | 1.3  | 879.9406  | 4 | 35.25 | 42       | F42:1790 | OB5955 H1 Ro.raw  | 0                   | 0        | 0                       | 422   | 451 | Carbamidomethylation                | M11:Oxidation (M):12.28;C14:Carbamidomethylation:1000.00               | PEAKS DB  |
| K.KGSEEEGDITNPINLREGEPLDSNN(+.98)FGK.L                        | Y    | 30.79  | 3059.4319 | 28     | 8.8  | 765.8720  | 4 | 31.05 | 38       | F38:1466 | OB5951 H3A Ro.raw | 0                   | 0        | 0                       | 386   | 413 |                                     | N25:Deamidation (NQ):0.00                                              | PEAKS DB  |
| R.DQSSY(+15.99)LQGFSR.N                                       | N    | 30.72  | 1302.5840 | 11     | 1.6  | 652.3003  | 2 | 29.24 | 43       | F43:1470 | OB5956 H1 Ro.raw  | 6.7205E4            | 1        | 1                       | 308   | 318 | Oxidation or Hydroxylation          | Y5:Oxidation or Hydroxylation:26.36                                    | PEAKS PTM |
| K.SFNLDEGHALRIPSGFISYILNRHDNQN(+.98)LR.V                      | N    | 30.43  | 3496.7600 | 30     | 4.9  | 700.3627  | 5 | 37.51 | 39       | F39:1925 | OB5952 H3A Ro.raw | 2.7478E5            | 1        | 1                       | 255   | 284 |                                     | N28:Deamidation (NQ):10.11                                             | PEAKS DB  |
| D.KDNVIDQIEK.Q                                                | N    | 30.42  | 1200.6350 | 10     | -0.3 | 601.3246  | 2 | 26.31 | 42       | F42:1252 | OB5955 H1 Ro.raw  | 0                   | 0        | 0                       | 547   | 556 |                                     |                                                                        | PEAKS DB  |
| N.TLEAAFNAEFNIRR.V                                            | N    | 30.42  | 1779.8904 | 15     | 3.5  | 890.9556  | 2 | 33.23 | 43       | F43:1696 | OB5956 H1 Ro.raw  | 1.5374E5            | 1        | 1                       | 320   | 334 |                                     |                                                                        | PEAKS DB  |
| R.IPSGFISYILN(+15.99)R.H                                      | N    | 30.30  | 1394.7557 | 12     | -2.8 | 698.3832  | 2 | 36.42 | 41       | F41:1875 | OB5954 H1 Ro.raw  | 3.8045E5            | 1        | 1                       | 266   | 277 |                                     | N11:Oxidation or Hydroxylation:0.00                                    | PEAKS PTM |
| R.IFLAGDKD(-18.01)NV.I                                        | N    | 30.00  | 1072.5553 | 10     | 0.7  | 537.2853  | 2 | 32.26 | 42       | F42:1603 | OB5955 H1 Ro.raw  | 2.1452E6            | 1        | 1                       | 541   | 550 | Dehydration                         | D8:Dehydration:45.01                                                   | PEAKS PTM |
| R.NTLEAAFNAEFN(+15.99)EIRR.V                                  | N    | 29.99  | 1909.9282 | 16     | 0.9  | 955.9723  | 2 | 32.98 | 42       | F42:1662 | OB5955 H1 Ro.raw  | 2.366E6             | 2        | 2                       | 319   | 334 |                                     | N12:Oxidation or Hydroxylation:0.00                                    | PEAKS PTM |
| R.IFLAGDKDNVIDQ(+.98)IEK.Q                                    | N    | 29.73  | 1817.9410 | 16     | 7.7  | 909.9848  | 2 | 63.08 | 43       | F43:3435 | OB5956 H1 Ro.raw  | 3.1606E3            | 1        | 1                       | 541   | 556 |                                     | Q13:Deamidation (NQ):11.12                                             | PEAKS DB  |
| K.V(+57.02)SKEHVEELTK.H                                       | N    | 29.60  | 1354.7092 | 11     | -1.7 | 678.3607  | 2 | 24.05 | 42       | F42:1120 | OB5955 H1 Ro.raw  | 0                   | 0        | 0                       | 368   | 378 |                                     | V1:Carbamidomethylation (DHKE, X@N-term):0.00                          | PEAKS PTM |
| I.F(+127.06)LAGDKDNVIDQIEK.Q                                  | N    | 29.59  | 1830.9363 | 15     | 0.7  | 916.4761  | 2 | 32.18 | 41       | F41:1600 | OB5954 H1 Ro.raw  | 6.5822E4            | 1        | 1                       | 542   | 556 | N-Succinimidyl-2-morpholine acetate | F1:N-Succinimidyl-2-morpholine acetate:28.79                           | PEAKS PTM |
| K.N(+.98)PQLQ(+.98)DLDMMLTC(+57.02)VEIKEGALM(+15.99)LPHFNSK.A | N    | 29.50  | 3389.6016 | 29     | 9.6  | 848.4158  | 4 | 37.65 | 43       | F43:2047 | OB5956 H1 Ro.raw  | 6.1505E6            | 1        | 1                       | 423   | 451 | Carbamidomethylation                | N1:Deamidation (NQ):0.00;Q5:Deamidation (NQ):14.04;C13:Carb            | PEAKS DB  |
| total 250 peptides                                            |      |        |           |        |      |           |   |       |          |          |                   |                     |          |                         |       |     |                                     |                                                                        |           |



| Peptide                                                                | Uniq | -10lgP | Mass      | Length | ppm | m/z      | z | RT    | Fraction | Scan     | Source File      | Area Roasted in gel | #Feature | #Feature Roasted in gel | Start | End | PTM                                 | AScore                                                                                                                                         | Found By  |
|------------------------------------------------------------------------|------|--------|-----------|--------|-----|----------|---|-------|----------|----------|------------------|---------------------|----------|-------------------------|-------|-----|-------------------------------------|------------------------------------------------------------------------------------------------------------------------------------------------|-----------|
|                                                                        |      |        |           |        |     |          |   |       |          |          |                  |                     |          |                         |       |     |                                     | amidomet hylation:1 000.00;M 22:Oxidati on (M):0. 00                                                                                           |           |
| H.RIVQIEAKPNTLVLPK.H                                                   | N    | 29.34  | 1818.1090 | 16     | 0.6 | 607.0439 | 3 | 29.55 | 42       | F42:1454 | OB5955 H1 Ro.raw | 7.8202E4            | 1        | 1                       | 213   | 228 |                                     |                                                                                                                                                | PEAKS DB  |
| R.NN(+.98)PFYFPSRR.F                                                   | N    | 29.19  | 1297.6204 | 10     | 9.3 | 649.8235 | 2 | 62.71 | 43       | F43:3425 | OB5956 H1 Ro.raw | 0                   | 0        | 0                       | 172   | 181 |                                     | N2:Deami dation (N Q):7.21                                                                                                                     | PEAKS DB  |
| R.NTLEAAFNAEFN(+.98)EIR.R                                              | N    | 29.07  | 1738.8162 | 15     | 9.2 | 870.4233 | 2 | 44.36 | 42       | F42:2331 | OB5955 H1 Ro.raw | 5.4416E3            | 1        | 1                       | 319   | 333 |                                     | N12:Dea midation (NQ):0.00                                                                                                                     | PEAKS DB  |
| R.EGE(+21.98)QEWGTPGSHVR.E                                             | N    | 28.92  | 1589.6835 | 14     | 1.4 | 795.8501 | 2 | 25.83 | 41       | F41:1231 | OB5954 H1 Ro.raw | 3.6144E3            | 1        | 1                       | 153   | 166 |                                     | E3:Sodiu m adduct: 9.74                                                                                                                        | PEAKS PTM |
| K.KNPQ(+.98)LQ(+.98)DLDMM(+15.99)LTC(+57.02)VEIKEGALM(+15.99)LPHFNSK.A | N    | 28.74  | 3533.6914 | 30     | 9.7 | 884.4387 | 4 | 35.77 | 42       | F42:1822 | OB5955 H1 Ro.raw | 2.7541E5            | 1        | 1                       | 422   | 451 | Carbamidomethylation; Oxidation (M) | Q4:Deami dation (N Q):8.22;Q 6:Deamid ation (N Q):5.55;M 11:Oxidati on (M):0. 00;C14:C arbamido methylati on:1000.0 0;M23:Ox idation (M):38.29 | PEAKS DB  |
| total 250 peptides                                                     |      |        |           |        |     |          |   |       |          |          |                  |                     |          |                         |       |     |                                     |                                                                                                                                                |           |

Q6PSU6|Q6PSU6\_ARAHY

back to list

| [Protein Coverage](#) | [Supporting Peptides](#) |

Protein Coverage:

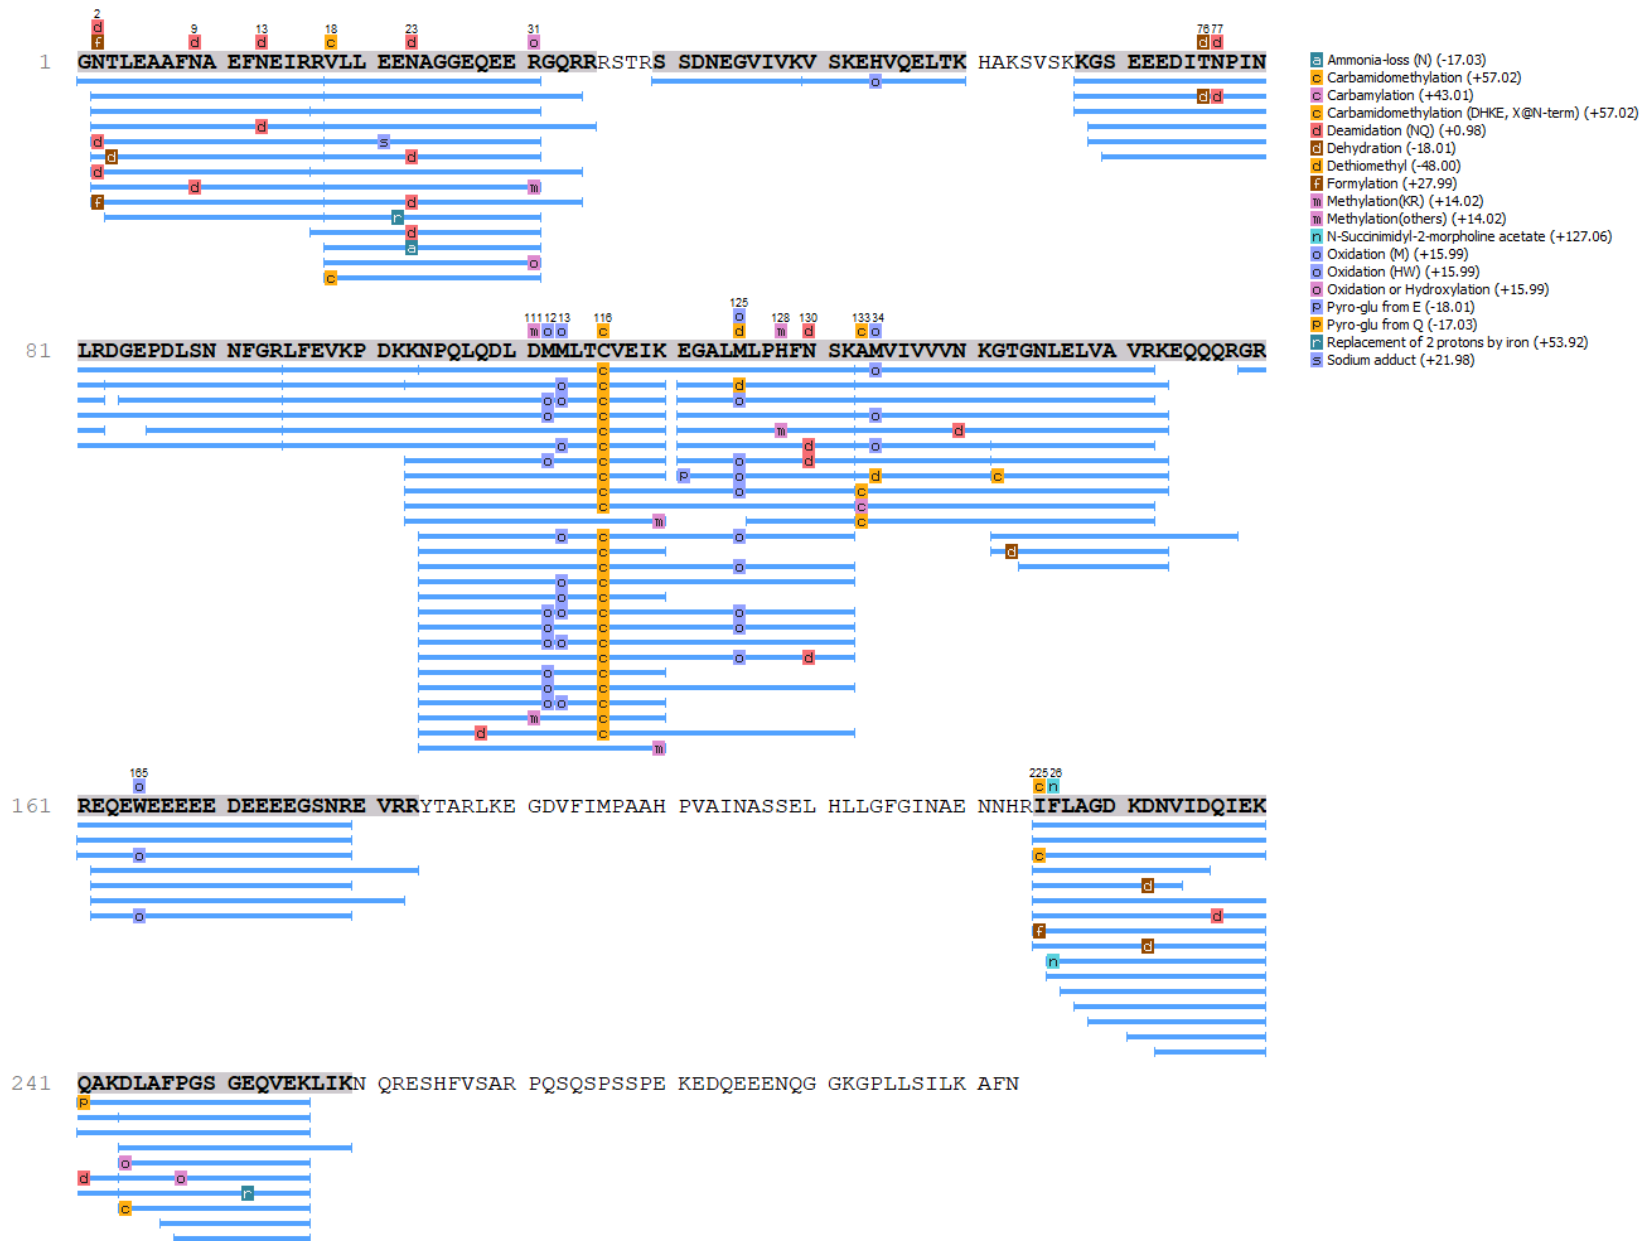

Supporting Peptides:

| Peptide                        | Uniq | -10lgP | Mass      | Length | ppm | m/z       | z | RT    | Fraction | Scan     | Source File      | Area Roasted in gel | #Feature | #Feature Roasted in gel | Start | End | PTM                  | AScore                       | Found By |
|--------------------------------|------|--------|-----------|--------|-----|-----------|---|-------|----------|----------|------------------|---------------------|----------|-------------------------|-------|-----|----------------------|------------------------------|----------|
| K.KNPQLQDLDMMLTC(+57.02)VEIK.E | N    | 136.41 | 2175.0737 | 18     | 1.4 | 1088.5457 | 2 | 35.26 | 43       | F43:1808 | OB5956 H1 Ro.raw | 1.4906E7            | 6        | 6                       | 103   | 120 | Carbamidomethylation | C14:Carb amidomet hylation:1 | PEAKS DB |
| total 152 peptides             |      |        |           |        |     |           |   |       |          |          |                  |                     |          |                         |       |     |                      |                              |          |

| Peptide                                       | Uniq | -10lgP | Mass      | Length | ppm  | m/z       | z | RT    | Fraction | Scan     | Source File       | Area Roasted in gel | #Feature | #Feature Roasted in gel | Start | End | PTM                                   | AScore                                                                              | Found By  |
|-----------------------------------------------|------|--------|-----------|--------|------|-----------|---|-------|----------|----------|-------------------|---------------------|----------|-------------------------|-------|-----|---------------------------------------|-------------------------------------------------------------------------------------|-----------|
|                                               |      |        |           |        |      |           |   |       |          |          |                   |                     |          |                         |       |     |                                       | 000.00                                                                              |           |
| G.NTLEAAFNAEFNEIR.R                           | N    | 130.93 | 1737.8322 | 15     | 1.8  | 869.9249  | 2 | 35.34 | 38       | F38:1714 | OB5951 H3A Ro.raw | 1.332E7             | 16       | 16                      | 2     | 16  |                                       |                                                                                     | PEAKS DB  |
| K.GSEEEEDITNPINLRDGEPLDLSNNFGR.L              | N    | 129.76 | 2887.3220 | 26     | -0.7 | 963.4473  | 3 | 32.67 | 43       | F43:1660 | OB5956 H1 Ro.raw  | 1.2475E7            | 11       | 11                      | 69    | 94  |                                       |                                                                                     | PEAKS DB  |
| K.NPQLQDLDMMLTC(+57.02)VEIK.E                 | N    | 128.40 | 2046.9788 | 17     | 0.2  | 1024.4968 | 2 | 37.11 | 43       | F43:1936 | OB5956 H1 Ro.raw  | 3.4643E7            | 10       | 10                      | 104   | 120 | Carbamidomethylation                  | C13:Carbamidomethylation:1000.00                                                    | PEAKS DB  |
| K.NPQLQDLDM(+15.99)MLTC(+57.02)VEIK.E         | N    | 128.16 | 2062.9736 | 17     | -4.2 | 1032.4897 | 2 | 36.93 | 43       | F43:1892 | OB5956 H1 Ro.raw  | 3.3834E6            | 3        | 3                       | 104   | 120 | Oxidation (M); Carbamidomethylation   | M9:Oxidation (M):30.46;C13:Carbamidomethylation:1000.00                             | PEAKS DB  |
| K.NPQLQDLDM(+15.99)LTC(+57.02)VEIK.E          | N    | 127.13 | 2062.9736 | 17     | 5.0  | 1032.4993 | 2 | 34.71 | 43       | F43:1780 | OB5956 H1 Ro.raw  | 1.0665E7            | 4        | 4                       | 104   | 120 | Oxidation (M); Carbamidomethylation   | M10:Oxidation (M):30.46;C13:Carbamidomethylation:1000.00                            | PEAKS DB  |
| R.EQEWEEEEEEEEEGSNR.E                         | N    | 125.55 | 2280.8413 | 18     | 3.9  | 1141.4324 | 2 | 28.35 | 43       | F43:1396 | OB5956 H1 Ro.raw  | 4.3429E6            | 7        | 7                       | 162   | 179 |                                       |                                                                                     | PEAKS DB  |
| K.NPQLQDLDM(+15.99)M(+15.99)LTC(+57.02)VEIK.E | N    | 121.59 | 2078.9688 | 17     | 6.6  | 1040.4985 | 2 | 33.82 | 43       | F43:1726 | OB5956 H1 Ro.raw  | 6.8984E4            | 2        | 2                       | 104   | 120 | Oxidation (M); Carbamidomethylation   | M9:Oxidation (M):1000.00;M10:Oxidation (M):1000.00;C13:Carbamidomethylation:1000.00 | PEAKS DB  |
| K.KNPQLQDLDM(+15.99)MLTC(+57.02)VEIK.E        | N    | 118.68 | 2191.0686 | 18     | 3.6  | 1096.5455 | 2 | 34.71 | 43       | F43:1781 | OB5956 H1 Ro.raw  | 1.3598E6            | 4        | 4                       | 103   | 120 | Oxidation (M); Carbamidomethylation   | M10:Oxidation (M):27.96;C14:Carbamidomethylation:1000.00                            | PEAKS DB  |
| K.AMVIVVVNKG TGNLELVAVR.K                     | N    | 114.87 | 2081.2031 | 20     | -1.0 | 1041.6078 | 2 | 34.35 | 43       | F43:1758 | OB5956 H1 Ro.raw  | 3.8361E7            | 13       | 13                      | 133   | 152 |                                       |                                                                                     | PEAKS DB  |
| R.IFLAGDKDNVIDQIEK.Q                          | N    | 110.41 | 1816.9570 | 16     | -1.1 | 909.4848  | 2 | 32.67 | 43       | F43:1648 | OB5956 H1 Ro.raw  | 4.2419E8            | 56       | 55                      | 225   | 240 |                                       |                                                                                     | PEAKS DB  |
| K.KNPQLQDLDM(+15.99)LTC(+57.02)VEIK.E         | N    | 110.35 | 2191.0686 | 18     | 3.5  | 1096.5454 | 2 | 32.98 | 42       | F42:1657 | OB5955 H1 Ro.raw  | 1.6495E6            | 4        | 4                       | 103   | 120 | Oxidation (M); Carbamidomethylation   | M11:Oxidation (M):23.10;C14:Carbamidomethylation:1000.00                            | PEAKS DB  |
| K.KGSEEEEDITNPINLRDGEPLDLSNNFGR.L             | N    | 109.79 | 3015.4170 | 27     | 3.4  | 1006.1497 | 3 | 31.62 | 41       | F41:1565 | OB5954 H1 Ro.raw  | 1.1559E7            | 21       | 21                      | 68    | 94  |                                       |                                                                                     | PEAKS DB  |
| R.VLLEENAGGEQEER.G                            | N    | 108.33 | 1571.7427 | 14     | 2.4  | 786.8805  | 2 | 26.83 | 42       | F42:1293 | OB5955 H1 Ro.raw  | 2.9858E7            | 10       | 10                      | 18    | 31  |                                       |                                                                                     | PEAKS DB  |
| K.AMVIVVVNKG TGNLELVAVRK.E                    | N    | 107.96 | 2209.2981 | 21     | 1.1  | 737.4408  | 3 | 33.05 | 43       | F43:1682 | OB5956 H1 Ro.raw  | 1.2362E8            | 20       | 20                      | 133   | 153 |                                       |                                                                                     | PEAKS DB  |
| K.KGSEEEEDITNPINLR.D                          | N    | 107.76 | 1713.8533 | 15     | 2.8  | 857.9363  | 2 | 29.07 | 43       | F43:1439 | OB5956 H1 Ro.raw  | 8.6032E6            | 7        | 7                       | 68    | 82  |                                       |                                                                                     | PEAKS DB  |
| R.I(+57.02)FLAGDKDNVIDQIEK.Q                  | N    | 105.70 | 1873.9785 | 16     | 1.7  | 937.9982  | 2 | 32.48 | 43       | F43:1653 | OB5956 H1         | 1.1722E7            | 5        | 5                       | 225   | 240 | Carbamidomethylation (DHKE, X@N-term) | I1:Carbamidometh                                                                    | PEAKS PTM |
| total 152 peptides                            |      |        |           |        |      |           |   |       |          |          |                   |                     |          |                         |       |     |                                       |                                                                                     |           |

| Peptide                                           | Uniq | -10lgP | Mass      | Length | ppm  | m/z       | z | RT    | Fraction | Scan     | Source File      | Area Roasted in gel | #Feature | #Feature Roasted in gel | Start | End | PTM                                   | AScore                                                  | Found By  |
|---------------------------------------------------|------|--------|-----------|--------|------|-----------|---|-------|----------|----------|------------------|---------------------|----------|-------------------------|-------|-----|---------------------------------------|---------------------------------------------------------|-----------|
|                                                   |      |        |           |        |      |           |   |       |          |          | Ro.raw           |                     |          |                         |       |     |                                       | ylation (D HKE, X@N-term):90.91                         |           |
| R.V(+57.02)LLEENAGGEQEER.G                        | N    | 103.80 | 1628.7642 | 14     | 0.3  | 815.3896  | 2 | 27.08 | 43       | F43:1322 | OB5956 H1 Ro.raw | 4.0193E5            | 3        | 3                       | 18    | 31  | Carbamidomethylation (DHKE, X@N-term) | V1:Carbamidomethylation (D HKE, X@N-term):49.37         | PEAKS PTM |
| K.NPQLQDLDMMLTCVEIK(+14.02).E                     | N    | 103.68 | 2003.9730 | 17     | -1.2 | 1002.9926 | 2 | 38.20 | 43       | F43:1989 | OB5956 H1 Ro.raw | 5.9168E6            | 4        | 4                       | 104   | 120 | Methylation(KR)                       | K17:Methylation(KR):1000.00                             | PEAKS PTM |
| K.AM(+15.99)VIVVVNKG TGNLELVAVR.K                 | N    | 103.14 | 2097.1980 | 20     | 1.6  | 700.0744  | 3 | 33.04 | 43       | F43:1684 | OB5956 H1 Ro.raw | 2.3148E7            | 9        | 9                       | 133   | 152 | Oxidation (M)                         | M2:Oxidation (M):1000.00                                | PEAKS DB  |
| R.DGEPDLSNNFGR.L                                  | N    | 102.69 | 1319.5742 | 12     | 0.3  | 660.7946  | 2 | 29.24 | 43       | F43:1495 | OB5956 H1 Ro.raw | 7.4875E6            | 3        | 3                       | 83    | 94  |                                       |                                                         | PEAKS DB  |
| K.DLAFFGSGEQVEK.L                                 | N    | 100.93 | 1375.6619 | 13     | -1.9 | 688.8369  | 2 | 30.34 | 43       | F43:1508 | OB5956 H1 Ro.raw | 9.196E7             | 8        | 8                       | 244   | 256 |                                       |                                                         | PEAKS DB  |
| K.NPQLQDLDM(+15.99)MLTC(+57.02)VEIKEGALMLPHFNSK.A | N    | 100.40 | 3387.6335 | 29     | -0.6 | 1130.2178 | 3 | 37.70 | 41       | F41:1939 | OB5954 H1 Ro.raw | 8.7706E7            | 6        | 6                       | 104   | 132 | Oxidation (M); Carbamidomethylation   | M9:Oxidation (M):26.02;C13:Carbamidomethylation:1000.00 | PEAKS DB  |
| R.RVLEENAGGEQEER.G                                | N    | 100.35 | 1727.8438 | 15     | 0.2  | 576.9553  | 3 | 25.30 | 42       | F42:1185 | OB5955 H1 Ro.raw | 8.2964E5            | 6        | 6                       | 17    | 31  |                                       |                                                         | PEAKS DB  |
| K.NPQLQDLDMMLTC(+57.02)VEIKEGALMLPHFNSK.A         | N    | 98.85  | 3371.6387 | 29     | -2.7 | 843.9147  | 4 | 38.02 | 43       | F43:1969 | OB5956 H1 Ro.raw | 1.5351E8            | 12       | 12                      | 104   | 132 | Carbamidomethylation                  | C13:Carbamidomethylation:1000.00                        | PEAKS DB  |
| K.KNPQLQDLDMMLTC(+57.02)VEIKEGALMLPHFNSK.A        | N    | 97.96  | 3499.7336 | 30     | -3.9 | 875.9373  | 4 | 36.80 | 41       | F41:1884 | OB5954 H1 Ro.raw | 6.677E6             | 4        | 4                       | 103   | 132 | Carbamidomethylation                  | C14:Carbamidomethylation:1000.00                        | PEAKS DB  |
| R.VLLEEN(+.98)AGGEQEER.G                          | N    | 94.48  | 1572.7267 | 14     | 2.8  | 787.3728  | 2 | 27.46 | 43       | F43:1340 | OB5956 H1 Ro.raw | 6.2395E5            | 3        | 3                       | 18    | 31  | Deamidation (NQ)                      | N6:Deamidation (NQ):121.37                              | PEAKS DB  |
| R.IFLAGDKDNVIDQIEKQAK.D                           | N    | 94.35  | 2144.1477 | 19     | -2.1 | 715.7217  | 3 | 32.42 | 42       | F42:1625 | OB5955 H1 Ro.raw | 3.3984E6            | 9        | 9                       | 225   | 243 |                                       |                                                         | PEAKS DB  |
| R.REQEWE EEEEEEGSNR.E                             | N    | 93.49  | 2436.9424 | 19     | 0.1  | 813.3215  | 3 | 26.72 | 43       | F43:1292 | OB5956 H1 Ro.raw | 8.6025E5            | 7        | 7                       | 161   | 179 |                                       |                                                         | PEAKS DB  |
| F.LAGDKDNVIDQIEK.Q                                | N    | 91.83  | 1556.8046 | 14     | -6.3 | 779.4047  | 2 | 32.21 | 43       | F43:1629 | OB5956 H1 Ro.raw | 5.4162E6            | 4        | 4                       | 227   | 240 |                                       |                                                         | PEAKS DB  |
| K.AMVIVVVK.G                                      | N    | 91.04  | 971.5837  | 9      | -0.5 | 486.7989  | 2 | 30.16 | 43       | F43:1494 | OB5956 H1 Ro.raw | 7.1361E6            | 3        | 3                       | 133   | 141 |                                       |                                                         | PEAKS DB  |
| K.D(+57.02)LAFFGSGEQVEK.L                         | N    | 88.60  | 1432.6833 | 13     | -0.1 | 717.3489  | 2 | 31.08 | 41       | F41:1535 | OB5954 H1 Ro.raw | 9.7986E5            | 3        | 3                       | 244   | 256 | Carbamidomethylation (DHKE, X@N-term) | D1:Carbamidomethylation (D HKE, X@N-term):131.10        | PEAKS PTM |
| K.EGALMLPHFNSK.A                                  | N    | 88.21  | 1342.6703 | 12     | 2.5  | 672.3441  | 2 | 30.67 | 43       | F43:1529 | OB5956 H1 Ro.raw | 1.4087E7            | 5        | 5                       | 121   | 132 |                                       |                                                         | PEAKS DB  |
| K.NPQLQDLDMM(-48.00)LTC(+57.02)VEIK.E             | N    | 88.05  | 1998.9755 | 17     | 1.9  | 1000.4969 | 2 | 32.85 | 43       | F43:1670 | OB5956 H1 Ro.raw | 5.9032E6            | 3        | 3                       | 104   | 120 | Carbamidomethylation                  | M10:Dethiomethyl:14.02;C13:Carbamidomethylation:1000.00 | PEAKS PTM |
| total 152 peptides                                |      |        |           |        |      |           |   |       |          |          |                  |                     |          |                         |       |     |                                       |                                                         |           |

| Peptide                                                   | Uniq | -10lgP | Mass      | Length | ppm  | m/z       | z | RT    | Fraction | Scan     | Source File       | Area Roasted in gel | #Feature | #Feature Roasted in gel | Start | End | PTM                                   | AScore                                                                          | Found By  |
|-----------------------------------------------------------|------|--------|-----------|--------|------|-----------|---|-------|----------|----------|-------------------|---------------------|----------|-------------------------|-------|-----|---------------------------------------|---------------------------------------------------------------------------------|-----------|
| K.GSEEDITNPINLR.D                                         | N    | 87.68  | 1585.7583 | 14     | 2.3  | 793.8882  | 2 | 31.16 | 42       | F42:1548 | OB5955 H1 Ro.raw  | 3.3709E6            | 3        | 3                       | 69    | 82  |                                       |                                                                                 | PEAKS DB  |
| R.GRREQEWEEEEDEEEGSNR.E                                   | N    | 87.21  | 2650.0649 | 21     | 1.1  | 884.3632  | 3 | 26.73 | 41       | F41:1280 | OB5954 H1 Ro.raw  | 7.9956E5            | 6        | 6                       | 159   | 179 |                                       |                                                                                 | PEAKS DB  |
| GNTLEAAFNAEFNEIRR.V                                       | Y    | 86.80  | 1950.9547 | 17     | 3.7  | 976.4882  | 2 | 35.08 | 43       | F43:1794 | OB5956 H1 Ro.raw  | 2.2902E6            | 8        | 8                       | 1     | 17  |                                       |                                                                                 | PEAKS DB  |
| R.I(+27.99)FLAGDKDNVIDQIEK.Q                              | N    | 84.60  | 1844.9519 | 16     | -2.1 | 923.4813  | 2 | 36.23 | 41       | F41:1853 | OB5954 H1 Ro.raw  | 1.9485E6            | 3        | 3                       | 225   | 240 | Formylation                           | I1:Formylation:98.75                                                            | PEAKS PTM |
| K.KNPQLQDLDMMLTC(+57.02)VEIKEGALM(+15.99)LPHFNSK.A        | N    | 83.11  | 3515.7285 | 30     | -1.9 | 879.9377  | 4 | 36.03 | 43       | F43:1857 | OB5956 H1 Ro.raw  | 6.6263E6            | 3        | 3                       | 103   | 132 | Carbamidomethylation; Oxidation (M)   | C14:Carbamidomethylation:1000.00;M23:Oxidation (M):114.34                       | PEAKS DB  |
| G.NTLEAAFNAEFNEIRR.V                                      | N    | 82.99  | 1893.9332 | 16     | -2.6 | 947.9714  | 2 | 34.11 | 42       | F42:1711 | OB5955 H1 Ro.raw  | 3.0959E8            | 36       | 35                      | 2     | 17  |                                       |                                                                                 | PEAKS DB  |
| K.A(+57.02)MVIVVVNKG TG NLELVAVR.K                        | N    | 82.14  | 2138.2246 | 20     | -5.4 | 1070.1138 | 2 | 34.47 | 42       | F42:1739 | OB5955 H1 Ro.raw  | 4.4412E6            | 3        | 3                       | 133   | 152 | Carbamidomethylation (DHKE, X@N-term) | A1:Carbamidomethylation (DHKE, X@N-term):207.56                                 | PEAKS PTM |
| K.DLAFPGSGEQVEKLIK.N                                      | N    | 80.89  | 1729.9249 | 16     | -1.6 | 865.9706  | 2 | 33.95 | 30       | F30:1478 | OB5926 H3B Ro.raw | 3.9305E5            | 5        | 4                       | 244   | 259 |                                       |                                                                                 | PEAKS DB  |
| I.FLAGDKDNVIDQIEK.Q                                       | N    | 80.64  | 1703.8729 | 15     | -5.7 | 852.9388  | 2 | 32.22 | 43       | F43:1635 | OB5956 H1 Ro.raw  | 3.1343E5            | 3        | 3                       | 226   | 240 |                                       |                                                                                 | PEAKS DB  |
| K.EGALM(+15.99)LPHFNSK.A                                  | N    | 80.48  | 1358.6653 | 12     | 1.1  | 680.3406  | 2 | 29.85 | 43       | F43:1485 | OB5956 H1 Ro.raw  | 3.0314E6            | 5        | 5                       | 121   | 132 | Oxidation (M)                         | M5:Oxidation (M):1000.00                                                        | PEAKS DB  |
| K.GTGNLELVAVR.K                                           | N    | 80.39  | 1127.6299 | 11     | -1.3 | 564.8215  | 2 | 30.21 | 41       | F41:1476 | OB5954 H1 Ro.raw  | 2.4706E7            | 5        | 5                       | 142   | 152 |                                       |                                                                                 | PEAKS DB  |
| G.NTLEAAFN(+.98)AEFNEIRR.V                                | N    | 79.02  | 1894.9172 | 16     | -2.2 | 948.4638  | 2 | 32.35 | 41       | F41:1616 | OB5954 H1 Ro.raw  | 1.3357E6            | 5        | 5                       | 2     | 17  | Deamidation (NQ)                      | N8:Deamidation (NQ):48.12                                                       | PEAKS DB  |
| R.VLLEENAGGEQEER(+14.02).G                                | N    | 78.92  | 1585.7583 | 14     | 0.7  | 793.8870  | 2 | 27.86 | 41       | F41:1339 | OB5954 H1 Ro.raw  | 1.6341E5            | 3        | 3                       | 18    | 31  | Methylation(KR)                       | R14:Methylation(KR):1000.00                                                     | PEAKS PTM |
| K.GTGNLELVAVRK.E                                          | N    | 78.87  | 1255.7249 | 12     | 0.7  | 628.8701  | 2 | 27.30 | 41       | F41:1322 | OB5954 H1 Ro.raw  | 2.29E7              | 10       | 10                      | 142   | 153 |                                       |                                                                                 | PEAKS DB  |
| K.NPQLQDLDM(+15.99)LTC(+57.02)VEIKEGALMLPHFNSK.A          | N    | 78.01  | 3387.6335 | 29     | -0.8 | 1130.2175 | 3 | 36.42 | 41       | F41:1862 | OB5954 H1 Ro.raw  | 6.8935E7            | 6        | 6                       | 104   | 132 | Oxidation (M); Carbamidomethylation   | M10:Oxidation (M):24.44;C13:Carbamidomethylation:1000.00                        | PEAKS DB  |
| R.LFEVKPKKNPQLQDLDMMLTC(+57.02)VEIK.E                     | N    | 77.87  | 3131.6069 | 26     | -4.0 | 1044.8721 | 3 | 34.65 | 42       | F42:1756 | OB5955 H1 Ro.raw  | 5.0788E6            | 4        | 4                       | 95    | 120 | Carbamidomethylation                  | C22:Carbamidomethylation:1000.00                                                | PEAKS DB  |
| K.NPQLQDLDM(+15.99)MLTC(+57.02)VEIKEGALM(+15.99)LPHFNSK.A | N    | 77.10  | 3403.6284 | 29     | 1.1  | 851.9153  | 4 | 37.51 | 41       | F41:1883 | OB5954 H1 Ro.raw  | 7.3887E6            | 7        | 7                       | 104   | 132 | Oxidation (M); Carbamidomethylation   | M9:Oxidation (M):27.96;C13:Carbamidomethylation:1000.00;M22:Oxidation (M):71.31 | PEAKS DB  |
| total 152 peptides                                        |      |        |           |        |      |           |   |       |          |          |                   |                     |          |                         |       |     |                                       |                                                                                 |           |

| Peptide                                                    | Uniq | -10lgP | Mass      | Length | ppm  | m/z       | z | RT    | Fraction | Scan     | Source File       | Area Roasted in gel | #Feature | #Feature Roasted in gel | Start | End | PTM                                 | AScore                                                                           | Found By  |
|------------------------------------------------------------|------|--------|-----------|--------|------|-----------|---|-------|----------|----------|-------------------|---------------------|----------|-------------------------|-------|-----|-------------------------------------|----------------------------------------------------------------------------------|-----------|
| R.IFLAGDKDNVIDQIEKQ(+.98)AK.D                              | N    | 76.22  | 2145.1316 | 19     | 1.5  | 716.0522  | 3 | 33.08 | 42       | F42:1661 | OB5955 H1 Ro.raw  | 0                   | 0        | 0                       | 225   | 243 | Deamidation (NQ)                    | Q17:Deamidation (NQ):48.83                                                       | PEAKS DB  |
| L.AGDKDNVIDQIEK.Q                                          | N    | 75.39  | 1443.7205 | 13     | -3.7 | 722.8649  | 2 | 32.08 | 42       | F42:1607 | OB5955 H1 Ro.raw  | 3.3426E5            | 1        | 1                       | 228   | 240 |                                     |                                                                                  | PEAKS DB  |
| R.SSDNEGVIVK.V                                             | N    | 75.32  | 1046.5244 | 10     | -1.0 | 524.2690  | 2 | 23.58 | 41       | F41:1103 | OB5954 H1 Ro.raw  | 3.7568E5            | 3        | 3                       | 40    | 49  |                                     |                                                                                  | PEAKS DB  |
| K.NPQLQLDLM(+15.99)M(+15.99)LTC(+57.02)VEIKEGALMLPHFNSK.A  | N    | 73.00  | 3403.6284 | 29     | -3.9 | 1135.5457 | 3 | 35.83 | 43       | F43:1849 | OB5956 H1 Ro.raw  | 7.8068E6            | 5        | 5                       | 104   | 132 | Oxidation (M); Carbamidomethylation | M9:Oxidation (M):54.18;M10:Oxidation (M):63.99;C13:Carbamidomethylation:1000.00  | PEAKS DB  |
| K.KNPQLQLDLM(+15.99)MLTC(+57.02)VEIKEGALM(+15.99)LPHFNSK.A | N    | 72.71  | 3531.7234 | 30     | -1.9 | 883.9364  | 4 | 35.86 | 41       | F41:1821 | OB5954 H1 Ro.raw  | 7.53E5              | 1        | 1                       | 103   | 132 | Carbamidomethylation; Oxidation (M) | M10:Oxidation (M):17.01;C14:Carbamidomethylation:1000.00;M23:Oxidation (M):85.25 | PEAKS DB  |
| R.VLLEENAGGEQEERGQR.R                                      | N    | 72.44  | 1912.9238 | 17     | 0.6  | 957.4698  | 2 | 25.30 | 42       | F42:1191 | OB5955 H1 Ro.raw  | 3.1353E6            | 8        | 8                       | 18    | 34  |                                     |                                                                                  | PEAKS DB  |
| K.QAKDLAFPGSGEQVEK.L                                       | N    | 72.39  | 1702.8525 | 16     | 1.2  | 568.6255  | 3 | 27.08 | 43       | F43:1321 | OB5956 H1 Ro.raw  | 2.8232E5            | 6        | 6                       | 241   | 256 |                                     |                                                                                  | PEAKS DB  |
| K.EGALMLPHFN(+.98)SK.A                                     | N    | 71.37  | 1343.6543 | 12     | 2.6  | 672.8362  | 2 | 31.66 | 43       | F43:1595 | OB5956 H1 Ro.raw  | 1.0101E5            | 2        | 2                       | 121   | 132 | Deamidation (NQ)                    | N10:Deamidation (NQ):1000.00                                                     | PEAKS DB  |
| R.EQEW(+15.99)EEEEEEEEEGSNR.E                              | N    | 70.36  | 2296.8362 | 18     | 3.2  | 1149.4291 | 2 | 27.67 | 41       | F41:1333 | OB5954 H1 Ro.raw  | 1.024E6             | 3        | 3                       | 162   | 179 | Oxidation (HW)                      | W4:Oxidation (HW):1000.00                                                        | PEAKS PTM |
| G.N(+.98)TLEAAFNAEFNEIRR.V                                 | N    | 69.73  | 1894.9172 | 16     | 0.4  | 948.4662  | 2 | 32.39 | 42       | F42:1620 | OB5955 H1 Ro.raw  | 2.6319E6            | 3        | 3                       | 2     | 17  | Deamidation (NQ)                    | N1:Deamidation (NQ):41.52                                                        | PEAKS DB  |
| E.PDLSNNFGR.L                                              | N    | 69.35  | 1018.4832 | 9      | 0.9  | 510.2493  | 2 | 31.57 | 43       | F43:1584 | OB5956 H1 Ro.raw  | 1.3026E6            | 4        | 4                       | 86    | 94  |                                     |                                                                                  | PEAKS DB  |
| R.LFEVKPKKPNPQLQLDMM(+15.99)LTC(+57.02)VEIK.E              | N    | 69.17  | 3147.6018 | 26     | 2.2  | 787.9095  | 4 | 33.24 | 42       | F42:1670 | OB5955 H1 Ro.raw  | 2.0797E6            | 2        | 2                       | 95    | 120 | Oxidation (M); Carbamidomethylation | M19:Oxidation (M):40.00;C22:Carbamidomethylation:1000.00                         | PEAKS DB  |
| R.IFLAGDKDNVID(+57.02)QIEK.Q                               | N    | 69.05  | 1873.9785 | 16     | -1.3 | 937.9953  | 2 | 32.42 | 42       | F42:1608 | OB5955 H1 Ro.raw  | 8.0339E6            | 1        | 1                       | 225   | 240 |                                     | D12:Carbamidomethylation (DHKE, X@N-term):15.85                                  | PEAKS PTM |
| A.GDKDNVIDQIEK.Q                                           | N    | 68.14  | 1372.6833 | 12     | -7.0 | 687.3441  | 2 | 32.22 | 43       | F43:1632 | OB5956 H1 Ro.raw  | 1.1241E6            | 3        | 3                       | 229   | 240 |                                     |                                                                                  | PEAKS DB  |
| G.SEEEDITNPINLRDGEPLDSNNFGR.L                              | N    | 68.10  | 2830.3005 | 25     | -1.6 | 944.4417  | 3 | 33.02 | 30       | F30:1421 | OB5926 H3B Ro.raw | 1.3758E5            | 3        | 3                       | 70    | 94  |                                     |                                                                                  | PEAKS DB  |
| R.RVLEEN(+.98)AGGEQEER.G                                   | N    | 67.83  | 1728.8278 | 15     | -0.8 | 577.2827  | 3 | 25.96 | 42       | F42:1233 | OB5955 H1 Ro.raw  | 1.359E4             | 2        | 2                       | 17    | 31  | Deamidation (NQ)                    | N7:Deamidation (NQ):77.53                                                        | PEAKS DB  |
| total 152 peptides                                         |      |        |           |        |      |           |   |       |          |          |                   |                     |          |                         |       |     |                                     |                                                                                  |           |

| Peptide                                                           | Uniq | -10lgP | Mass      | Length | ppm  | m/z       | z | RT    | Fraction | Scan     | Source File      | Area Roasted in gel | #Feature | #Feature Roasted in gel | Start | End | PTM                                   | AScore                                                                                                        | Found By  |
|-------------------------------------------------------------------|------|--------|-----------|--------|------|-----------|---|-------|----------|----------|------------------|---------------------|----------|-------------------------|-------|-----|---------------------------------------|---------------------------------------------------------------------------------------------------------------|-----------|
| R.RVLLEENAGGEQEERGQR.R                                            | N    | 67.67  | 2069.0249 | 18     | 1.9  | 690.6835  | 3 | 25.60 | 41       | F41:1205 | OB5954 H1 Ro.raw | 1.8247E6            | 3        | 3                       | 17    | 34  |                                       |                                                                                                               | PEAKS DB  |
| K.Q(-17.03)AKDLAFPGSGEQVEK.L                                      | N    | 67.52  | 1685.8260 | 16     | 0.1  | 843.9204  | 2 | 29.98 | 43       | F43:1503 | OB5956 H1 Ro.raw | 9.9003E4            | 3        | 3                       | 241   | 256 | Pyro-glu from Q                       | Q1:Pyro-glu from Q:1000.00                                                                                    | PEAKS PTM |
| K.NPQLQ(+.98)DLDMMLTC(+57.02)VEIK.E                               | N    | 67.25  | 2047.9629 | 17     | 1.5  | 1024.9902 | 2 | 44.46 | 43       | F43:2348 | OB5956 H1 Ro.raw | 0                   | 0        | 0                       | 104   | 120 | Carbamidomethylation                  | Q5:Deamidation (N Q):19.68; C13:Carbamidomethylation:1000.00                                                  | PEAKS DB  |
| K.AM(+15.99)VIVVVK.G                                              | N    | 66.42  | 987.5787  | 9      | 1.1  | 494.7972  | 2 | 27.11 | 41       | F41:1283 | OB5954 H1 Ro.raw | 1.8879E6            | 3        | 3                       | 133   | 141 | Oxidation (M)                         | M2:Oxidation (M):1000.00                                                                                      | PEAKS DB  |
| K.KNPQLQDLDMMLTCVEIK(+14.02).E                                    | N    | 66.06  | 2132.0679 | 18     | -0.6 | 1067.0405 | 2 | 36.31 | 41       | F41:1858 | OB5954 H1 Ro.raw | 5.2356E5            | 2        | 2                       | 103   | 120 | Methylation(KR)                       | K18:Methylation(KR):130.57                                                                                    | PEAKS PTM |
| K.NPQLQDLDMMLTC(+57.02)VEIKEGALM(+15.99)LPHFNSK.A                 | N    | 64.76  | 3387.6335 | 29     | -0.6 | 847.9152  | 4 | 37.63 | 43       | F43:1915 | OB5956 H1 Ro.raw | 8.7706E7            | 6        | 6                       | 104   | 132 | Carbamidomethylation; Oxidation (M)   | C13:Carbamidomethylation:1000.00;M22:Oxidation (M):82.05                                                      | PEAKS DB  |
| A.FPGSGEQVEK.L                                                    | N    | 64.10  | 1076.5138 | 10     | -3.4 | 539.2623  | 2 | 30.29 | 42       | F42:1495 | OB5955 H1 Ro.raw | 4.0412E5            | 3        | 3                       | 247   | 256 |                                       |                                                                                                               | PEAKS DB  |
| R.LFEVKPKKK.N                                                     | N    | 63.79  | 1102.6385 | 9      | 0.6  | 552.3269  | 2 | 24.50 | 43       | F43:1159 | OB5956 H1 Ro.raw | 1.1348E6            | 6        | 6                       | 95    | 103 |                                       |                                                                                                               | PEAKS DB  |
| K.EGALMLPH(+14.02)FNSK.A                                          | N    | 63.06  | 1356.6860 | 12     | -4.2 | 679.3475  | 2 | 30.85 | 43       | F43:1554 | OB5956 H1 Ro.raw | 2.9707E5            | 3        | 3                       | 121   | 132 | Methylation(others)                   | H8:Methylation(others):65.81                                                                                  | PEAKS PTM |
| K.A(+57.02)MVIVVVKGTGNLELVAVRK.E                                  | N    | 62.52  | 2266.3196 | 21     | 0.7  | 1134.1678 | 2 | 32.98 | 42       | F42:1660 | OB5955 H1 Ro.raw | 1.5099E7            | 6        | 6                       | 133   | 153 | Carbamidomethylation (DHKE, X@N-term) | A1:Carbamidomethylation (DHKE, X@N-term):139.69                                                               | PEAKS PTM |
| K.NPQLQDLDM(+15.99)LTC(+57.02)VEIKEGALM(+15.99)LPHFNSK.A          | N    | 61.19  | 3403.6284 | 29     | 0.3  | 851.9147  | 4 | 35.86 | 41       | F41:1801 | OB5954 H1 Ro.raw | 3.4294E6            | 4        | 4                       | 104   | 132 | Oxidation (M); Carbamidomethylation   | M10:Oxidation (M):21.94;C13:Carbamidomethylation:1000.00;M22:Oxidation (M):61.50                              | PEAKS DB  |
| K.G(+57.02)TGNLELVAVRK.E                                          | N    | 60.73  | 1312.7462 | 12     | -0.4 | 657.3801  | 2 | 27.30 | 41       | F41:1303 | OB5954 H1 Ro.raw | 3.6978E5            | 2        | 2                       | 142   | 153 | Carbamidomethylation (DHKE, X@N-term) | G1:Carbamidomethylation (DHKE, X@N-term):55.46                                                                | PEAKS PTM |
| R.EQEWEEEEEEEEEGSNREVR.R                                          | N    | 60.58  | 2821.1545 | 22     | 1.9  | 941.3939  | 3 | 26.71 | 43       | F43:1297 | OB5956 H1 Ro.raw | 1.0274E6            | 4        | 4                       | 162   | 183 |                                       |                                                                                                               | PEAKS DB  |
| K.NPQLQDLDM(+15.99)M(+15.99)LTC(+57.02)VEIKEGALM(+15.99)LPHFNSK.A | N    | 60.17  | 3419.6233 | 29     | -0.9 | 855.9124  | 4 | 34.83 | 42       | F42:1766 | OB5955 H1 Ro.raw | 1.2322E6            | 3        | 3                       | 104   | 132 | Oxidation (M); Carbamidomethylation   | M9:Oxidation (M):1000.00;M10:Oxidation (M):1000.00;C13:Carbamidomethylation:1000.00;M22:Oxidation (M):1000.00 | PEAKS DB  |
| total 152 peptides                                                |      |        |           |        |      |           |   |       |          |          |                  |                     |          |                         |       |     |                                       |                                                                                                               |           |

| Peptide                                             | Uniq | -10lgP | Mass      | Length | ppm  | m/z       | z | RT    | Fraction | Scan     | Source File      | Area Roasted in gel | #Feature | #Feature Roasted in gel | Start | End | PTM                                 | AScore                                                                             | Found By  |
|-----------------------------------------------------|------|--------|-----------|--------|------|-----------|---|-------|----------|----------|------------------|---------------------|----------|-------------------------|-------|-----|-------------------------------------|------------------------------------------------------------------------------------|-----------|
| R.LFEVKPDKKNPQLQ(+.98)DLDM(+15.99)LTC(+57.02)VEIK.E | N    | 59.38  | 3148.5857 | 26     | 7.4  | 788.1595  | 4 | 33.17 | 42       | F42:1670 | OB5955 H1 Ro.raw | 3.9804E5            | 1        | 1                       | 95    | 120 | Oxidation (M); Carbamidomethylation | Q14:Deamidation (NQ):0.00;M19:Oxidation (M):23.10;C22:Carbamidomethylation:1000.00 | PEAKS DB  |
| R.VLLEEN(-17.03)AGGEQEER.G                          | N    | 59.22  | 1554.7162 | 14     | 1.2  | 778.3663  | 2 | 27.73 | 42       | F42:1335 | OB5955 H1 Ro.raw | 0                   | 0        | 0                       | 18    | 31  | Ammonia-loss (N)                    | N6:Ammonia-loss (N):1000.00                                                        | PEAKS PTM |
| R.LFEVKPDK.K                                        | N    | 58.71  | 974.5436  | 8      | 1.7  | 488.2799  | 2 | 25.30 | 42       | F42:1183 | OB5955 H1 Ro.raw | 1.7315E6            | 6        | 6                       | 95    | 102 |                                     |                                                                                    | PEAKS DB  |
| K.GSEEEEDITNPIN(+.98)LRDGEPLSNNFGR.L                | N    | 58.69  | 2888.3059 | 26     | 6.7  | 1445.1699 | 2 | 32.90 | 41       | F41:1642 | OB5954 H1 Ro.raw | 1.7853E5            | 1        | 1                       | 69    | 94  |                                     | N12:Deamidation (NQ):12.33                                                         | PEAKS DB  |
| R.IFLAGDKDNVIDQ(+.98)IEKQAK.D                       | N    | 58.20  | 2145.1316 | 19     | 1.4  | 716.0521  | 3 | 33.04 | 43       | F43:1686 | OB5956 H1 Ro.raw | 1.2153E5            | 1        | 1                       | 225   | 243 | Deamidation (NQ)                    | Q13:Deamidation (NQ):25.18                                                         | PEAKS DB  |
| K.G(+57.02)TGNLELVAVR.K                             | N    | 57.51  | 1184.6514 | 11     | -2.7 | 593.3314  | 2 | 30.10 | 42       | F42:1486 | OB5955 H1 Ro.raw | 1.7196E5            | 2        | 2                       | 142   | 152 |                                     | G1:Carbamidomethylation (DHKE, X@N-term):19.78                                     | PEAKS PTM |
| R.IFLAGD(+57.02)KDNVIDQIEK.Q                        | N    | 57.43  | 1873.9785 | 16     | 1.7  | 625.6678  | 3 | 32.52 | 41       | F41:1637 | OB5954 H1 Ro.raw | 2.7943E5            | 3        | 3                       | 225   | 240 |                                     | D6:Carbamidomethylation (DHKE, X@N-term):15.57                                     | PEAKS PTM |
| R.IFLAGDK(+15.99)DNVIDQIEK.Q                        | N    | 57.39  | 1832.9519 | 16     | -1.9 | 917.4814  | 2 | 31.99 | 41       | F41:1600 | OB5954 H1 Ro.raw | 7.5922E5            | 2        | 2                       | 225   | 240 |                                     | K7:Oxidation or Hydroxylation:17.01                                                | PEAKS PTM |
| R.LFEVKPDKKNPQLQDLDM(+15.99)MLTC(+57.02)VEIK.E      | N    | 57.09  | 3147.6018 | 26     | -1.9 | 787.9062  | 4 | 34.20 | 41       | F41:1734 | OB5954 H1 Ro.raw | 2.4894E6            | 4        | 4                       | 95    | 120 | Oxidation (M); Carbamidomethylation | M18:Oxidation (M):33.98;C22:Carbamidomethylation:1000.00                           | PEAKS DB  |
| G.NTLEAAFNAEFN(+.98)EIRR.V                          | N    | 54.77  | 1894.9172 | 16     | 1.8  | 948.4676  | 2 | 33.04 | 43       | F43:1685 | OB5956 H1 Ro.raw | 2.2573E6            | 5        | 5                       | 2     | 17  | Deamidation (NQ)                    | N12:Deamidation (NQ):39.02                                                         | PEAKS DB  |
| R.IFLAGDKDNVIDQIEK(+57.02)QAK.D                     | N    | 54.07  | 2201.1692 | 19     | 0.3  | 734.7306  | 3 | 32.48 | 43       | F43:1657 | OB5956 H1 Ro.raw | 1.2122E6            | 3        | 3                       | 225   | 243 |                                     | K16:Carbamidomethylation (DHKE, X@N-term):11.12                                    | PEAKS PTM |
| K.AM(+15.99)VVVVNKG TGNLELVAVRK.E                   | N    | 52.95  | 2225.2930 | 21     | -1.3 | 742.7706  | 3 | 32.42 | 42       | F42:1596 | OB5955 H1 Ro.raw | 1.4247E6            | 3        | 3                       | 133   | 153 | Oxidation (M)                       | M2:Oxidation (M):1000.00                                                           | PEAKS DB  |
| K.KNPQLQ(+.98)DLDMMLTC(+57.02)VEIKEGALMLPHFSK.A     | N    | 51.97  | 3500.7175 | 30     | 3.4  | 876.1896  | 4 | 36.93 | 43       | F43:1903 | OB5956 H1 Ro.raw | 9.2646E6            | 2        | 2                       | 103   | 132 | Carbamidomethylation                | Q6:Deamidation (NQ):14.04;C14:Carbamidomethylation:1000.00                         | PEAKS DB  |
| R.IFLAGDKDNVID.Q                                    | N    | 51.22  | 1318.6769 | 12     | -0.9 | 660.3451  | 2 | 31.76 | 43       | F43:1606 | OB5956 H1 Ro.raw | 1.1173E5            | 3        | 3                       | 225   | 236 |                                     |                                                                                    | PEAKS DB  |
| total 152 peptides                                  |      |        |           |        |      |           |   |       |          |          |                  |                     |          |                         |       |     |                                     |                                                                                    |           |



| Peptide                                                   | Uniq | -10lgP | Mass      | Length | ppm  | m/z       | z | RT    | Fraction | Scan     | Source File      | Area Roasted in gel | #Feature | #Feature Roasted in gel | Start | End | PTM                                       | AScore                                                                               | Found By  |
|-----------------------------------------------------------|------|--------|-----------|--------|------|-----------|---|-------|----------|----------|------------------|---------------------|----------|-------------------------|-------|-----|-------------------------------------------|--------------------------------------------------------------------------------------|-----------|
| K.NPQLQDLDM(+15.99)LTC(+57.02)VEIKEGALMLPHFN(+.98)SK.A    | N    | 49.99  | 3388.6174 | 29     | 6.1  | 848.1668  | 4 | 36.39 | 43       | F43:1880 | OB5956 H1 Ro.raw | 1.7975E6            | 1        | 1                       | 104   | 132 | Oxidation (M); Carbamidomethylation       | M10:Oxidation (M):27.96;C13:Carbamidomethylation:1000.00;N27:Deamidation (NQ):18.27  | PEAKS DB  |
| R.EQEWEEEEEEEGSNREVR.R                                    | N    | 49.84  | 2665.0535 | 21     | 2.4  | 889.3605  | 3 | 27.88 | 41       | F41:1353 | OB5954 H1 Ro.raw | 4.9786E4            | 1        | 1                       | 162   | 182 |                                           |                                                                                      | PEAKS DB  |
| T.GNLELVAVRK.E                                            | N    | 49.53  | 1097.6556 | 10     | 0.5  | 549.8354  | 2 | 27.00 | 42       | F42:1296 | OB5955 H1 Ro.raw | 3.4872E5            | 3        | 3                       | 144   | 153 |                                           |                                                                                      | PEAKS DB  |
| F.PSGSEQVEK.L                                             | N    | 49.06  | 929.4454  | 9      | -3.7 | 465.7282  | 2 | 30.34 | 43       | F43:1524 | OB5956 H1 Ro.raw | 5.2705E4            | 1        | 1                       | 248   | 256 |                                           |                                                                                      | PEAKS DB  |
| K.AMVVVVNK(+57.02)GTGNLELVAVRK.E                          | N    | 48.92  | 2266.3196 | 21     | 1.3  | 756.4481  | 3 | 33.23 | 43       | F43:1673 | OB5956 H1 Ro.raw | 3.1193E6            | 1        | 1                       | 133   | 153 |                                           | K9:Carbamidomethylation (DHKE, X@N-term):8.78                                        | PEAKS PTM |
| G.N(+.98)TLEAFNAEFNEIR.R                                  | N    | 46.63  | 1738.8162 | 15     | 9.2  | 870.4233  | 2 | 44.36 | 42       | F42:2303 | OB5955 H1 Ro.raw | 5.4416E3            | 1        | 1                       | 2     | 16  | Deamidation (NQ)                          | N1:Deamidation (NQ):39.47                                                            | PEAKS DB  |
| R.VLLE(+21.98)ENAGGEQEER.G                                | N    | 46.37  | 1593.7246 | 14     | -1.1 | 797.8687  | 2 | 26.71 | 43       | F43:1300 | OB5956 H1 Ro.raw | 4.0134E5            | 3        | 3                       | 18    | 31  | Sodium adduct                             | E4:Sodium adduct:40.00                                                               | PEAKS PTM |
| K.GTGNLELVAVRKEQQQR.G                                     | N    | 46.31  | 1925.0442 | 17     | 1.4  | 642.6896  | 3 | 26.67 | 43       | F43:1294 | OB5956 H1 Ro.raw | 2.1018E4            | 1        | 1                       | 142   | 158 |                                           |                                                                                      | PEAKS DB  |
| K.NPQLQDL(+14.02)MMLTC(+57.02)VEIK.E                      | N    | 45.99  | 2060.9944 | 17     | 0.2  | 1031.5046 | 2 | 37.33 | 41       | F41:1934 | OB5954 H1 Ro.raw | 2.7407E4            | 1        | 1                       | 104   | 120 | Methylation(others); Carbamidomethylation | D8:Methylation(others):42.68;C13:Carbamidomethylation:1000.00                        | PEAKS PTM |
| K.GTGNLE(+57.02)LVAVRK.E                                  | N    | 45.75  | 1312.7462 | 12     | -0.8 | 657.3799  | 2 | 27.17 | 42       | F42:1295 | OB5955 H1 Ro.raw | 1.9882E5            | 1        | 1                       | 142   | 153 |                                           | E6:Carbamidomethylation (DHKE, X@N-term):0.00                                        | PEAKS PTM |
| K.A(+43.01)MVVVVNKGTGNLELVAVR.K                           | N    | 45.64  | 2124.2090 | 20     | 0.7  | 1063.1125 | 2 | 33.65 | 41       | F41:1688 | OB5954 H1 Ro.raw | 8.0739E4            | 1        | 1                       | 133   | 152 | Carbamylation                             | A1:Carbamylation:161.20                                                              | PEAKS PTM |
| R.VLLEEN(+.98)AGGEQEERGQR.R                               | N    | 45.60  | 1913.9078 | 17     | -1.6 | 638.9755  | 3 | 25.99 | 41       | F41:1234 | OB5954 H1 Ro.raw | 0                   | 0        | 0                       | 18    | 34  | Deamidation (NQ)                          | N6:Deamidation (NQ):28.79                                                            | PEAKS DB  |
| K.KNPQLQDLDM(+15.99)LTC(+57.02)VEIKEGALM(+15.99)LPHFNSK.A | N    | 45.45  | 3531.7234 | 30     | -1.1 | 883.9372  | 4 | 35.80 | 42       | F42:1822 | OB5955 H1 Ro.raw | 0                   | 0        | 0                       | 103   | 132 | Carbamidomethylation; Oxidation (M)       | M11:Oxidation (M):0.00;C14:Carbamidomethylation:1000.00;M23:Oxidation (M):45.87      | PEAKS DB  |
| R.LFEVKPKKNPQLQDLDM(+15.99)M(+15.99)LTC(+57.02)VEIK.E     | N    | 45.43  | 3163.5967 | 26     | -2.8 | 791.9042  | 4 | 32.90 | 41       | F41:1650 | OB5954 H1 Ro.raw | 2.0535E6            | 3        | 3                       | 95    | 120 | Oxidation (M); Carbamidomethylation       | M18:Oxidation (M):1000.00;M19:Oxidation (M):1000.00;C22:Carbamidomethylation:1000.00 | PEAKS DB  |
| total 152 peptides                                        |      |        |           |        |      |           |   |       |          |          |                  |                     |          |                         |       |     |                                           |                                                                                      |           |

| Peptide                                                        | Uniq | -10lgP | Mass      | Length | ppm  | m/z       | z | RT    | Fraction | Scan     | Source File      | Area Roasted in gel | #Feature | #Feature Roasted in gel | Start | End | PTM                                                   | AScore                                                                                                     | Found By  |
|----------------------------------------------------------------|------|--------|-----------|--------|------|-----------|---|-------|----------|----------|------------------|---------------------|----------|-------------------------|-------|-----|-------------------------------------------------------|------------------------------------------------------------------------------------------------------------|-----------|
| K.KNPQLQDLDM(+15.99)MLTC(+57.02)VEIKEGALMLPHFNSK.A             | N    | 44.60  | 3515.7285 | 30     | -1.9 | 879.9377  | 4 | 35.30 | 41       | F41:1798 | OB5954 H1 Ro.raw | 6.4162E5            | 1        | 1                       | 103   | 132 | Carbamidomethylation                                  | M10:Oxidation (M):14.02;C14:Carbamidomethylation:1000.00                                                   | PEAKS DB  |
| K.KGSEEDIT(-18.01)N(+.98)PINLR.D                               | N    | 41.27  | 1696.8268 | 15     | 2.3  | 566.6175  | 3 | 29.07 | 43       | F43:1442 | OB5956 H1 Ro.raw | 3.8118E5            | 3        | 3                       | 68    | 82  | Dehydration; Deamidation (NQ)                         | T9:Dehydration:45.01;N10:Deamidation (NQ):59.10                                                            | PEAKS PTM |
| K.NPQLQDLDM(+15.99)LTC(+57.02)VEIKEGALM(+15.99)LPHFN(+.98)SK.A | N    | 41.25  | 3404.6125 | 29     | -0.4 | 1135.8777 | 3 | 36.69 | 42       | F42:1878 | OB5955 H1 Ro.raw | 3.8423E5            | 1        | 1                       | 104   | 132 | Carbamidomethylation; Oxidation (M); Deamidation (NQ) | M10:Oxidation (M):0.00;C13:Carbamidomethylation:1000.00;M22:Oxidation (M):39.23;N27:Deamidation (NQ):69.52 | PEAKS DB  |
| R.REQEW(+15.99)EEEEEEEEEGSNR.E                                 | N    | 41.18  | 2452.9375 | 19     | -0.6 | 818.6526  | 3 | 25.98 | 41       | F41:1239 | OB5954 H1 Ro.raw | 2.4114E4            | 1        | 1                       | 161   | 179 | Oxidation (HW)                                        | W5:Oxidation (HW):1000.00                                                                                  | PEAKS PTM |
| K.DLAFP(+15.99)GSGEQVEK.L                                      | N    | 41.14  | 1391.6569 | 13     | 0.5  | 696.8361  | 2 | 29.36 | 42       | F42:1432 | OB5955 H1 Ro.raw | 7.4528E5            | 3        | 3                       | 244   | 256 | Oxidation or Hydroxylation                            | P5:Oxidation or Hydroxylation:67.76                                                                        | PEAKS PTM |
| K.AMVVVVN(+.98)KGTGNLAVVRK.E                                   | N    | 41.03  | 2210.2820 | 21     | 1.9  | 1106.1504 | 2 | 34.35 | 42       | F42:1720 | OB5955 H1 Ro.raw | 4.5718E5            | 1        | 1                       | 133   | 153 | Deamidation (NQ)                                      | N8:Deamidation (NQ):28.79                                                                                  | PEAKS DB  |
| K.EGALM(-48.00)LPHFNSK.A                                       | N    | 40.53  | 1294.6670 | 12     | 0.5  | 432.5632  | 3 | 28.76 | 41       | F41:1389 | OB5954 H1 Ro.raw | 2.208E6             | 2        | 2                       | 121   | 132 | Dethiomethyl                                          | M5:Dethiomethyl:1000.00                                                                                    | PEAKS PTM |
| R.VLLEENAGGEQEERGQRR.R                                         | N    | 40.17  | 2069.0249 | 18     | 1.0  | 518.2640  | 4 | 25.49 | 42       | F42:1205 | OB5955 H1 Ro.raw | 2.0305E5            | 2        | 2                       | 18    | 35  |                                                       |                                                                                                            | PEAKS DB  |
| R.VLLEENAGGEQEER(+15.99).G                                     | N    | 39.98  | 1587.7375 | 14     | 1.8  | 794.8775  | 2 | 26.70 | 41       | F41:1275 | OB5954 H1 Ro.raw | 0                   | 0        | 0                       | 18    | 31  | Oxidation or Hydroxylation                            | R14:Oxidation or Hydroxylation:20.88                                                                       | PEAKS PTM |
| G.N(+27.99)TLEAAFNAEFNEIRR.V                                   | N    | 39.68  | 1921.9282 | 16     | -1.7 | 961.9697  | 2 | 37.51 | 41       | F41:1908 | OB5954 H1 Ro.raw | 3.7767E4            | 1        | 1                       | 2     | 17  | Formylation                                           | N1:Formylation:1000.00                                                                                     | PEAKS PTM |
| K.E(-18.01)GALM(+15.99)LPHFNSK.A                               | N    | 39.64  | 1340.6547 | 12     | 0.2  | 447.8923  | 3 | 30.21 | 41       | F41:1479 | OB5954 H1 Ro.raw | 7.81E5              | 1        | 1                       | 121   | 132 | Pyro-glu from E; Oxidation (M)                        | E1:Pyro-glu from E:1000.00; M5:Oxidation (M):1000.00                                                       | PEAKS PTM |
| R.VLLEE(+53.92)NAGGEQEER.G                                     | N    | 39.58  | 1625.6620 | 14     | -1.0 | 542.8940  | 3 | 26.76 | 42       | F42:1278 | OB5955 H1 Ro.raw | 0                   | 0        | 0                       | 18    | 31  | Replacement of 2 protons by iron                      | E5:Replacement of 2 protons by iron:20.92                                                                  | PEAKS PTM |
| D.GEPDLSNNFGR.L                                                | N    | 39.46  | 1204.5472 | 11     | 3.0  | 603.2827  | 2 | 28.20 | 41       | F41:1371 | OB5954 H1 Ro.raw | 1.5511E4            | 1        | 1                       | 84    | 94  |                                                       |                                                                                                            | PEAKS DB  |
| K.NPQLQ(+.98)LDMM(+15.99)LTC(+57.02)VEIKEGALM(+15.99)LPHFNSK.A | N    | 39.15  | 3404.6125 | 29     | -1.8 | 852.1589  | 4 | 38.22 | 43       | F43:1993 | OB5956 H1 Ro.raw | 7.6266E5            | 1        | 1                       | 104   | 132 | Deamidation (NQ); Carbamidomethylation                | Q5:Deamidation (NQ):49.79; M10:Oxidation (M):0.00;C13:Carbamidomethylation:1000.00;M22:O                   | PEAKS DB  |
| total 152 peptides                                             |      |        |           |        |      |           |   |       |          |          |                  |                     |          |                         |       |     |                                                       |                                                                                                            |           |

| Peptide                                                 | Uniq | -10lgP | Mass      | Length | ppm  | m/z       | z | RT    | Fraction | Scan     | Source File      | Area Roasted in gel | #Feature | #Feature Roasted in gel | Start | End | PTM                              | AScore                                                                              | Found By  |
|---------------------------------------------------------|------|--------|-----------|--------|------|-----------|---|-------|----------|----------|------------------|---------------------|----------|-------------------------|-------|-----|----------------------------------|-------------------------------------------------------------------------------------|-----------|
|                                                         |      |        |           |        |      |           |   |       |          |          |                  |                     |          |                         |       |     |                                  | xidation (M):14.60                                                                  |           |
| K.N(+.98)PQLQLDLM(+15.99)MLTC(+57.02)VEIKEGALMLPHFNSK.A | N    | 38.83  | 3388.6174 | 29     | 8.2  | 1695.3300 | 2 | 37.72 | 41       | F41:1941 | OB5954 H1 Ro.raw | 6.4698E5            | 1        | 1                       | 104   | 132 | Carbamidomethylation             | N1:Deamidation (N Q):0.00;M9:Oxidation (M):0.00;C13:Carbamidomethylation:1000.00    | PEAKS DB  |
| K.D(+15.99)LAFFPGSGEQVEK.L                              | N    | 38.81  | 1391.6569 | 13     | 0.5  | 696.8361  | 2 | 29.36 | 42       | F42:1368 | OB5955 H1 Ro.raw | 2.5725E5            | 1        | 1                       | 244   | 256 | Oxidation or Hydroxylation       | D1:Oxidation or Hydroxylation:77.13                                                 | PEAKS PTM |
| K.NPQ(+.98)LQDLMMMLTC(+57.02)VEIK.E                     | N    | 38.70  | 2047.9629 | 17     | 2.9  | 1024.9917 | 2 | 46.45 | 41       | F41:2441 | OB5954 H1 Ro.raw | 0                   | 0        | 0                       | 104   | 120 | Carbamidomethylation             | Q3:Deamidation (N Q):14.04;C13:Carbamidomethylation:1000.00                         | PEAKS DB  |
| R.IFLAGD(+15.99)KDNVIDQIEK.Q                            | N    | 38.52  | 1832.9519 | 16     | 1.9  | 917.4850  | 2 | 31.89 | 42       | F42:1590 | OB5955 H1 Ro.raw | 4.6198E5            | 1        | 1                       | 225   | 240 |                                  | D6:Oxidation or Hydroxylation:12.60                                                 | PEAKS PTM |
| R.IFLAGDKDN(+.98)VIDQIEKQ(+.98)AK.D                     | N    | 37.85  | 2146.1157 | 19     | 9.8  | 716.3862  | 3 | 32.98 | 42       | F42:1661 | OB5955 H1 Ro.raw | 8.6625E4            | 1        | 1                       | 225   | 243 |                                  | N9:Deamidation (N Q):13.83;Q17:Deamidation (NQ):17.65                               | PEAKS DB  |
| K.DLAFFPGSGE(+53.92)QVEK.L                              | N    | 37.31  | 1429.5812 | 13     | -6.3 | 715.7933  | 2 | 30.34 | 43       | F43:1518 | OB5956 H1 Ro.raw | 2.6492E5            | 1        | 1                       | 244   | 256 | Replacement of 2 protons by iron | E9:Replacement of 2 protons by iron:37.54                                           | PEAKS PTM |
| K.GT(-18.01)GNLELVAVRK.E                                | N    | 36.73  | 1237.7142 | 12     | 2.6  | 413.5797  | 3 | 27.00 | 42       | F42:1287 | OB5955 H1 Ro.raw | 4.7714E5            | 1        | 1                       | 142   | 153 | Dehydration                      | T2:Dehydration:1000.00                                                              | PEAKS PTM |
| G.NT(-18.01)LEAAFNAEFNEIRR.V                            | N    | 36.45  | 1875.9227 | 16     | 0.7  | 626.3153  | 3 | 34.16 | 43       | F43:1739 | OB5956 H1 Ro.raw | 6.9172E6            | 2        | 2                       | 2     | 17  | Dehydration                      | T2:Dehydration:1000.00                                                              | PEAKS PTM |
| K.EGALM(+15.99)LPHFN(+.98)SK.A                          | N    | 36.41  | 1359.6493 | 12     | 2.8  | 680.8338  | 2 | 31.22 | 41       | F41:1550 | OB5954 H1 Ro.raw | 0                   | 0        | 0                       | 121   | 132 | Oxidation (M); Deamidation (NQ)  | M5:Oxidation (M):1000.00;N10:Deamidation (N Q):1000.00                              | PEAKS DB  |
| M.LPHFNSK.A                                             | N    | 36.02  | 841.4446  | 7      | 1.3  | 421.7301  | 2 | 30.63 | 42       | F42:1510 | OB5955 H1 Ro.raw | 1.4673E6            | 2        | 2                       | 126   | 132 |                                  |                                                                                     | PEAKS DB  |
| K.NPQLQLDLM(-48.00)MLTC(+57.02)VEIK.E                   | N    | 35.81  | 1998.9755 | 17     | 6.7  | 667.3369  | 3 | 34.52 | 43       | F43:1773 | OB5956 H1 Ro.raw | 8.4276E5            | 1        | 1                       | 104   | 120 | Carbamidomethylation             | M9:Dethiomethyl:11.06;C13:Carbamidomethylation:1000.00                              | PEAKS PTM |
| K.KNPQLQ(+.98)DLDM(+15.99)LTC(+57.02)VEIKEGALMLPHFNSK.A | N    | 33.72  | 3516.7124 | 30     | 3.3  | 880.1883  | 4 | 35.48 | 41       | F41:1798 | OB5954 H1 Ro.raw | 7.5658E5            | 1        | 1                       | 103   | 132 | Carbamidomethylation             | Q6:Deamidation (N Q):18.55;M11:Oxidation (M):14.02;C14:Carbamidomethylation:1000.00 | PEAKS DB  |
| K.VSKEH(+15.99)VQELTK.H                                 | N    | 33.71  | 1312.6986 | 11     | 1.8  | 657.3578  | 2 | 23.73 | 42       | F42:1100 | OB5955 H1 Ro.raw | 1.3581E3            | 1        | 1                       | 50    | 60  | Oxidation (HW)                   | H5:Oxidation (HW):1000.00                                                           | PEAKS PTM |
| total 152 peptides                                      |      |        |           |        |      |           |   |       |          |          |                  |                     |          |                         |       |     |                                  |                                                                                     |           |

| Peptide                                                       | Uniq | -10lgP | Mass      | Length | ppm  | m/z       | z | RT    | Fraction | Scan     | Source File      | Area Roasted in gel | #Feature | #Feature Roasted in gel | Start | End | PTM                                 | AScore                                                                                                     | Found By  |
|---------------------------------------------------------------|------|--------|-----------|--------|------|-----------|---|-------|----------|----------|------------------|---------------------|----------|-------------------------|-------|-----|-------------------------------------|------------------------------------------------------------------------------------------------------------|-----------|
| R.IFLAGDKDNVID(-18.01)QIEK.Q                                  | N    | 33.09  | 1798.9464 | 16     | 0.7  | 900.4811  | 2 | 31.39 | 43       | F43:1591 | OB5956 H1 Ro.raw | 6.7846E4            | 1        | 1                       | 225   | 240 |                                     | D12:Dehydration:13.16                                                                                      | PEAKS PTM |
| D.NVIDQIEK.Q                                                  | N    | 32.64  | 957.5131  | 8      | 1.6  | 479.7646  | 2 | 28.19 | 42       | F42:1367 | OB5955 H1 Ro.raw | 3.0062E3            | 1        | 1                       | 233   | 240 |                                     |                                                                                                            | PEAKS DB  |
| K.AM(-48.00)VIVVVNK.G                                         | N    | 32.49  | 923.5804  | 9      | 0.0  | 462.7975  | 2 | 25.00 | 43       | F43:1192 | OB5956 H1 Ro.raw | 6.3177E3            | 1        | 1                       | 133   | 141 | Dethiomethyl                        | M2:Dethiomethyl:1000.00                                                                                    | PEAKS PTM |
| R.IFLAGDKD(-18.01)NVIDQIEK.Q                                  | N    | 31.82  | 1798.9464 | 16     | -0.9 | 600.6555  | 3 | 32.15 | 43       | F43:1589 | OB5956 H1 Ro.raw | 3.5634E5            | 1        | 1                       | 225   | 240 | Dehydration                         | D8:Dehydration:30.83                                                                                       | PEAKS PTM |
| K.D(+53.92)LAFPGSGEQVEK.L                                     | N    | 31.27  | 1429.5812 | 13     | -4.3 | 715.7948  | 2 | 30.56 | 41       | F41:1500 | OB5954 H1 Ro.raw | 3.7719E5            | 1        | 1                       | 244   | 256 |                                     | D1:Replacement of 2 protons by iron:0.00                                                                   | PEAKS PTM |
| K.AM(+15.99)VIVVVNK(+57.02)GTGNLELVAVR.K                      | N    | 30.97  | 2154.2195 | 20     | 2.8  | 1078.1200 | 2 | 32.98 | 42       | F42:1664 | OB5955 H1 Ro.raw | 2.0029E5            | 1        | 1                       | 133   | 152 | Oxidation (M)                       | M2:Oxidation (M):1000.00;K9:Carbamidomethylation (DHKE, X@N-term):0.00                                     | PEAKS PTM |
| K.KNPQLQDLMM(+15.99)LTC(+57.02)VEIKEGALMLPHFNSK.A             | N    | 30.83  | 3515.7285 | 30     | 1.3  | 879.9406  | 4 | 35.25 | 42       | F42:1790 | OB5955 H1 Ro.raw | 0                   | 0        | 0                       | 103   | 132 | Carbamidomethylation                | M11:Oxidation (M):12.28;C14:Carbamidomethylation:1000.00                                                   | PEAKS DB  |
| D.KDNVIDQIEK.Q                                                | N    | 30.42  | 1200.6350 | 10     | -0.3 | 601.3246  | 2 | 26.31 | 42       | F42:1252 | OB5955 H1 Ro.raw | 0                   | 0        | 0                       | 231   | 240 |                                     |                                                                                                            | PEAKS DB  |
| N.TLEAAFNAEFNEIRR.V                                           | N    | 30.42  | 1779.8904 | 15     | 3.5  | 890.9556  | 2 | 33.23 | 43       | F43:1696 | OB5956 H1 Ro.raw | 1.5374E5            | 1        | 1                       | 3     | 17  |                                     |                                                                                                            | PEAKS DB  |
| R.IFLAGDKD(-18.01)NV.I                                        | N    | 30.00  | 1072.5553 | 10     | 0.7  | 537.2853  | 2 | 32.26 | 42       | F42:1603 | OB5955 H1 Ro.raw | 2.1452E6            | 1        | 1                       | 225   | 234 | Dehydration                         | D8:Dehydration:45.01                                                                                       | PEAKS PTM |
| G.NTLEAAFNAEFN(+15.99)EIRR.V                                  | N    | 29.99  | 1909.9282 | 16     | 0.9  | 955.9723  | 2 | 32.98 | 42       | F42:1662 | OB5955 H1 Ro.raw | 2.366E6             | 2        | 2                       | 2     | 17  |                                     | N12:Oxidation or Hydroxylation:0.00                                                                        | PEAKS PTM |
| R.IFLAGDKDNVIDQ(+.98)IEK.Q                                    | N    | 29.73  | 1817.9410 | 16     | 7.7  | 909.9848  | 2 | 63.08 | 43       | F43:3435 | OB5956 H1 Ro.raw | 3.1606E3            | 1        | 1                       | 225   | 240 |                                     | Q13:Deamidation (NQ):11.12                                                                                 | PEAKS DB  |
| I.F(+127.06)LAGDKDNVIDQIEK.Q                                  | N    | 29.59  | 1830.9363 | 15     | 0.7  | 916.4761  | 2 | 32.18 | 41       | F41:1600 | OB5954 H1 Ro.raw | 6.5822E4            | 1        | 1                       | 226   | 240 | N-Succinimidyl-2-morpholine acetate | F1:N-Succinimidyl-2-morpholine acetate:28.79                                                               | PEAKS PTM |
| K.N(+.98)PQLQ(+.98)DLDMMLTC(+57.02)VEIKEGALM(+15.99)LPHFNSK.A | N    | 29.50  | 3389.6016 | 29     | 9.6  | 848.4158  | 4 | 37.65 | 43       | F43:2047 | OB5956 H1 Ro.raw | 6.1505E6            | 1        | 1                       | 104   | 132 | Carbamidomethylation                | N1:Deamidation (NQ):0.00;Q5:Deamidation (NQ):14.04;C13:Carbamidomethylation:1000.00;M22:Oxidation (M):0.00 | PEAKS DB  |
| G.NTLEAAFNAEFN(+.98)EIR.R                                     | N    | 29.07  | 1738.8162 | 15     | 9.2  | 870.4233  | 2 | 44.36 | 42       | F42:2331 | OB5955 H1 Ro.raw | 5.4416E3            | 1        | 1                       | 2     | 16  |                                     | N12:Deamidation (NQ):0.00                                                                                  | PEAKS DB  |
| total 152 peptides                                            |      |        |           |        |      |           |   |       |          |          |                  |                     |          |                         |       |     |                                     |                                                                                                            |           |

| Peptide                                                                | Uniq | -10lgP | Mass      | Length | ppm | m/z      | z | RT    | Fraction | Scan     | Source File            | Area Roasted in gel | #Feature | #Feature Roasted in gel | Start | End | PTM                                    | AScore                                                                                                                                | Found By |
|------------------------------------------------------------------------|------|--------|-----------|--------|-----|----------|---|-------|----------|----------|------------------------|---------------------|----------|-------------------------|-------|-----|----------------------------------------|---------------------------------------------------------------------------------------------------------------------------------------|----------|
| K.KNPQ(+.98)LQ(+.98)DLDMM(+15.99)LTC(+57.02)VEIKEGALM(+15.99)LPHFNSK.A | N    | 28.74  | 3533.6914 | 30     | 9.7 | 884.4387 | 4 | 35.77 | 42       | F42:1822 | OB5955<br>H1<br>Ro.raw | 2.7541E5            | 1        | 1                       | 103   | 132 | Carbamidomethylation;<br>Oxidation (M) | Q4:Deamidation (N Q):8.22;Q6:Deamidation (N Q):5.55;M11:Oxidation (M):0.00;C14:C carbamidomethylation:1000.00;M23:Oxidation (M):38.29 | PEAKS DB |

total 152 peptides

E5G076|E5G076\_ARAHY

back to list

| [Protein Coverage](#) | [Supporting Peptides](#) |

Protein Coverage:

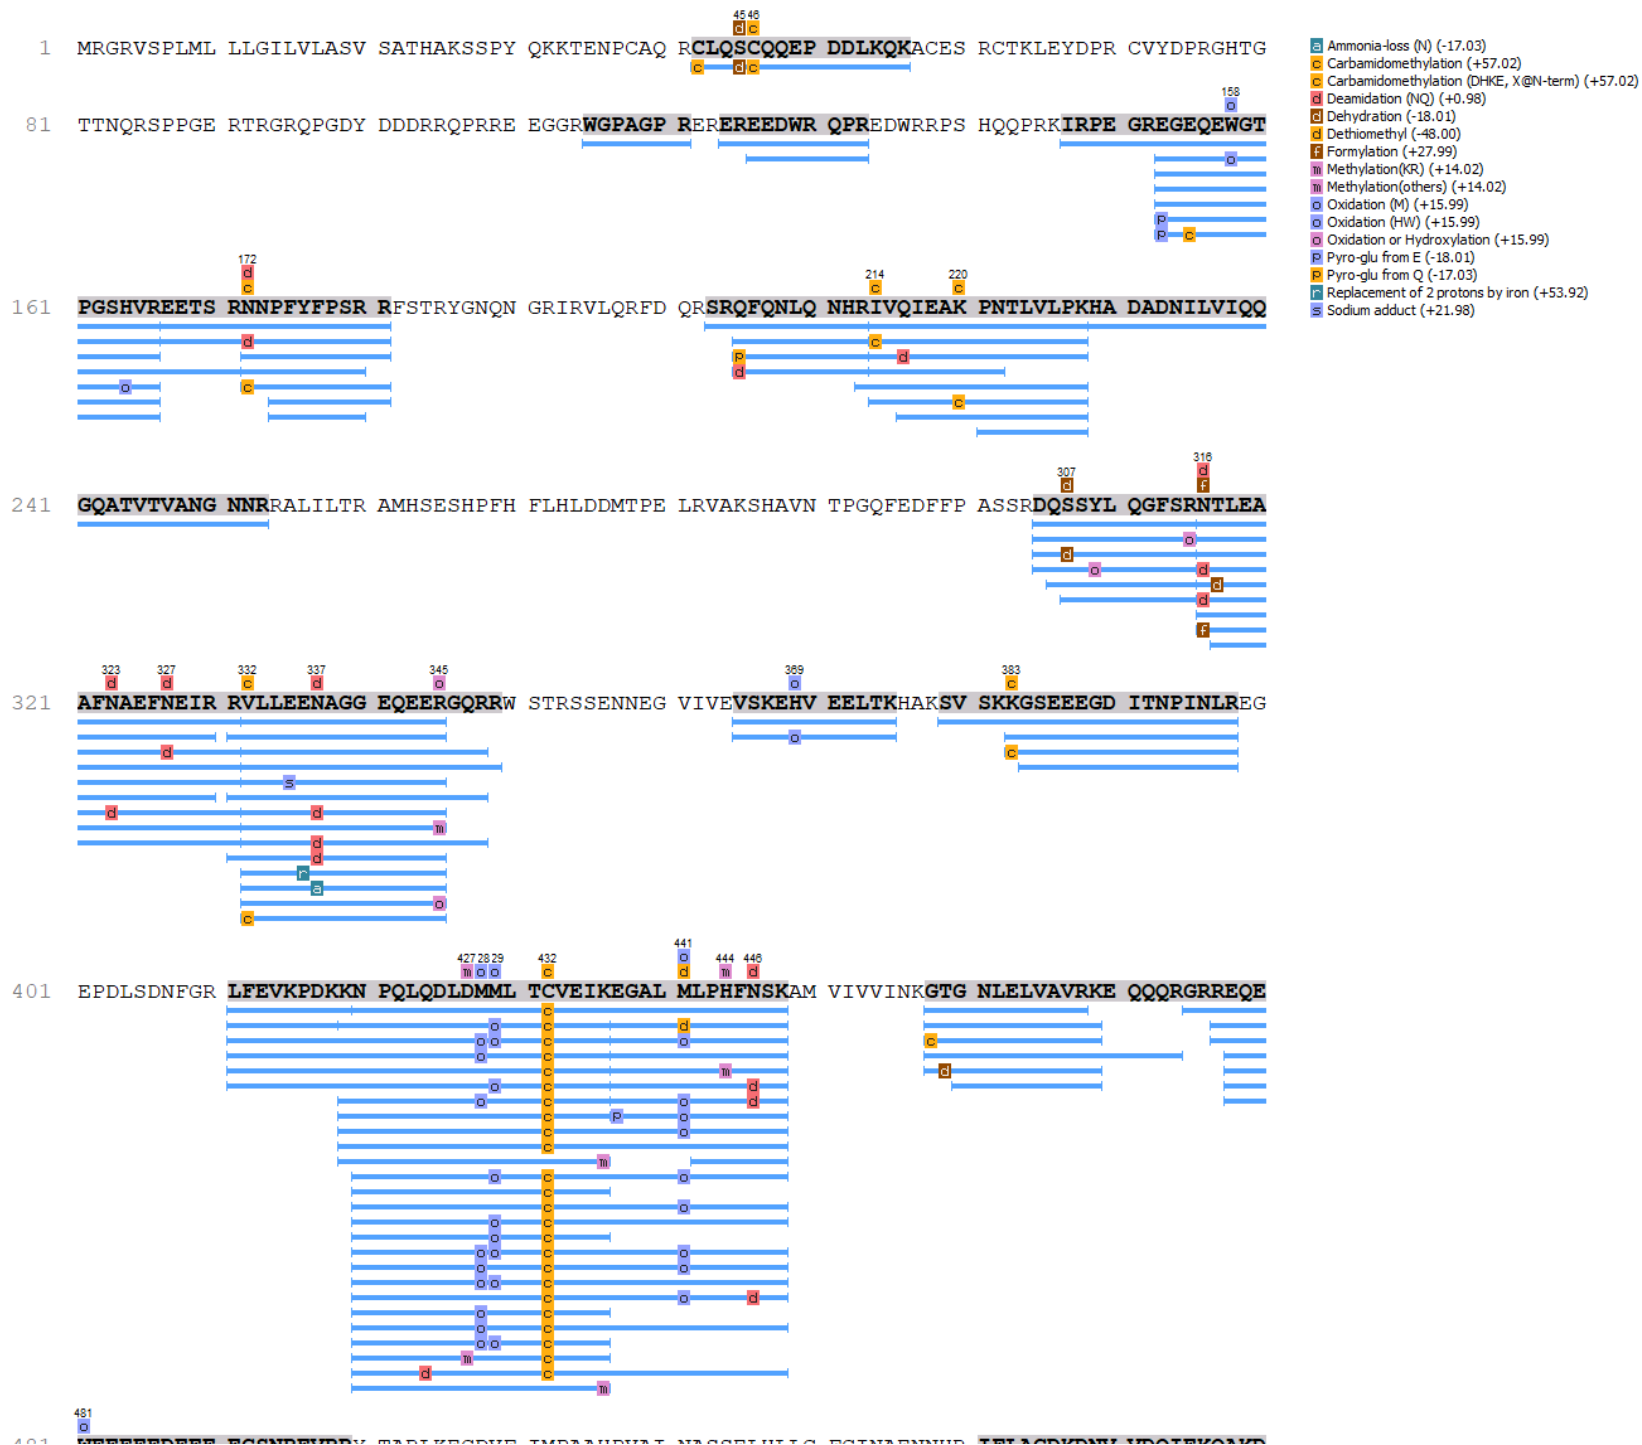

401 WEEEEEDEEE EGSNREYAR IAKLRGGDVE IMFARNFVAI NASSEELRLDG EGINAENNRK IELASGADNY VDVIERVARD  
Supporting Peptides:

| Peptide                                                                                                 | Uniq | -10lgP | Mass      | Length | ppm  | m/z       | z | RT    | Fraction | Scan     | Source File       | Area Roasted in gel | #Feature | #Feature Roasted in gel | Start | End | PTM                                   | AScore                                                                                       | Found By  |
|---------------------------------------------------------------------------------------------------------|------|--------|-----------|--------|------|-----------|---|-------|----------|----------|-------------------|---------------------|----------|-------------------------|-------|-----|---------------------------------------|----------------------------------------------------------------------------------------------|-----------|
| K.KNPQLQDLDMMLTLC(+57.02)VEIK.E<br>561 LAFPGSGEQV EKLIKQRES HFVSAR PQSQ SPSSPEKEDQ EEENQGGKGP LLSILKAFN | N    | 136.41 | 2175.0737 | 18     | 1.4  | 1088.5457 | 2 | 35.26 | 43       | F43:1808 | OB5956 H1 Ro.raw  | 1.4906E7            | 6        | 6                       | 419   | 436 | Carbamidomethylation                  | C14:Carb amidomet hylation:1 000.00                                                          | PEAKS DB  |
| R.NTLEAAFNAAFNEIR.R                                                                                     | N    | 130.93 | 1737.8322 | 15     | 1.8  | 869.9249  | 2 | 35.34 | 38       | F38:1714 | OB5951 H3A Ro.raw | 1.332E7             | 16       | 16                      | 316   | 330 |                                       |                                                                                              | PEAKS DB  |
| K.NPQLQDLDMMLTLC(+57.02)VEIK.E                                                                          | N    | 128.40 | 2046.9788 | 17     | 0.2  | 1024.4968 | 2 | 37.11 | 43       | F43:1936 | OB5956 H1 Ro.raw  | 3.4643E7            | 10       | 10                      | 420   | 436 | Carbamidomethylation                  | C13:Carb amidomet hylation:1 000.00                                                          | PEAKS DB  |
| K.NPQLQDLDM(+15.99)MLTLC(+57.02)VEIK.E                                                                  | N    | 128.16 | 2062.9736 | 17     | -4.2 | 1032.4897 | 2 | 36.93 | 43       | F43:1892 | OB5956 H1 Ro.raw  | 3.3834E6            | 3        | 3                       | 420   | 436 | Oxidation (M); Carbamidomethylation   | M9:Oxidat ion (M):3 0.46;C13: Carbami domethylat ion:1000. 00                                | PEAKS DB  |
| K.NPQLQDLDMM(+15.99)LTLC(+57.02)VEIK.E                                                                  | N    | 127.13 | 2062.9736 | 17     | 5.0  | 1032.4993 | 2 | 34.71 | 43       | F43:1780 | OB5956 H1 Ro.raw  | 1.0665E7            | 4        | 4                       | 420   | 436 | Oxidation (M); Carbamidomethylation   | M10:Oxid ation (M): 30.46;C1 3:Carbami domethyla tion:1000. 00                               | PEAKS DB  |
| R.EQEWEDEEEDEEEGSNR.E                                                                                   | N    | 125.55 | 2280.8413 | 18     | 3.9  | 1141.4324 | 2 | 28.35 | 43       | F43:1396 | OB5956 H1 Ro.raw  | 4.3429E6            | 7        | 7                       | 478   | 495 |                                       |                                                                                              | PEAKS DB  |
| K.NPQLQDLDM(+15.99)M(+15.99)LTLC(+57.02)VEIK.E                                                          | N    | 121.59 | 2078.9688 | 17     | 6.6  | 1040.4985 | 2 | 33.82 | 43       | F43:1726 | OB5956 H1 Ro.raw  | 6.8984E4            | 2        | 2                       | 420   | 436 | Oxidation (M); Carbamidomethylation   | M9:Oxidat ion (M):1 000.00;M 10:Oxidati on (M):10 00.00;C1 3:Carbami domethyla tion:1000. 00 | PEAKS DB  |
| K.KNPQLQDLDM(+15.99)MLTLC(+57.02)VEIK.E                                                                 | N    | 118.68 | 2191.0686 | 18     | 3.6  | 1096.5455 | 2 | 34.71 | 43       | F43:1781 | OB5956 H1 Ro.raw  | 1.3598E6            | 4        | 4                       | 419   | 436 | Oxidation (M); Carbamidomethylation   | M10:Oxid ation (M): 27.96;C1 4:Carbami domethyla tion:1000. 00                               | PEAKS DB  |
| K.KGSEEEGDITNPINLR.E                                                                                    | N    | 117.89 | 1770.8748 | 16     | 0.6  | 886.4452  | 2 | 28.91 | 43       | F43:1429 | OB5956 H1 Ro.raw  | 3.1542E7            | 8        | 8                       | 383   | 398 |                                       |                                                                                              | PEAKS DB  |
| K.KNPQLQDLDMM(+15.99)LTLC(+57.02)VEIK.E                                                                 | N    | 110.35 | 2191.0686 | 18     | 3.5  | 1096.5454 | 2 | 32.98 | 42       | F42:1657 | OB5955 H1 Ro.raw  | 1.6495E6            | 4        | 4                       | 419   | 436 | Oxidation (M); Carbamidomethylation   | M11:Oxid ation (M): 23.10;C1 4:Carbami domethyla tion:1000. 00                               | PEAKS DB  |
| R.VLLEENAGGEQEER.G                                                                                      | N    | 108.33 | 1571.7427 | 14     | 2.4  | 786.8805  | 2 | 26.83 | 42       | F42:1293 | OB5955 H1 Ro.raw  | 2.9858E7            | 10       | 10                      | 332   | 345 |                                       |                                                                                              | PEAKS DB  |
| K.GSEEEGDITNPINLR.E                                                                                     | N    | 108.06 | 1642.7798 | 15     | -0.5 | 822.3967  | 2 | 30.80 | 42       | F42:1519 | OB5955 H1 Ro.raw  | 1.1767E7            | 3        | 3                       | 384   | 398 |                                       |                                                                                              | PEAKS DB  |
| R.DQSSYLQGFSR.N                                                                                         | N    | 105.08 | 1286.5891 | 11     | 0.8  | 644.3024  | 2 | 30.81 | 40       | F40:1431 | OB5953 H3A Ro.raw | 9.5783E7            | 31       | 31                      | 305   | 315 |                                       |                                                                                              | PEAKS DB  |
| R.EGEQEWGTPGSHVR.E                                                                                      | N    | 104.71 | 1567.7015 | 14     | 2.6  | 784.8601  | 2 | 25.68 | 42       | F42:1206 | OB5955 H1 Ro.raw  | 3.4943E6            | 6        | 6                       | 153   | 166 |                                       |                                                                                              | PEAKS DB  |
| R.V(+57.02)LLEENAGGEQEER.G                                                                              | N    | 103.80 | 1628.7642 | 14     | 0.3  | 815.3896  | 2 | 27.08 | 43       | F43:1322 | OB5956 H1 Ro.raw  | 4.0193E5            | 3        | 3                       | 332   | 345 | Carbamidomethylation (DHKE, X@N-term) | V1:Carba midometh ylation (D                                                                 | PEAKS PTM |
| total 156 peptides                                                                                      |      |        |           |        |      |           |   |       |          |          |                   |                     |          |                         |       |     |                                       |                                                                                              |           |

| Peptide                                            | Uniq | -10lgP | Mass      | Length | ppm  | m/z       | z | RT    | Fraction | Scan     | Source File      | Area Roasted in gel | #Feature | #Feature Roasted in gel | Start | End | PTM                                   | AScore                                                    | Found By  |
|----------------------------------------------------|------|--------|-----------|--------|------|-----------|---|-------|----------|----------|------------------|---------------------|----------|-------------------------|-------|-----|---------------------------------------|-----------------------------------------------------------|-----------|
|                                                    |      |        |           |        |      |           |   |       |          |          |                  |                     |          |                         |       |     |                                       | HKE, X@N-term):49.37                                      |           |
| K.NPQLQDLDMMLTCVEIK(+14.02).E                      | N    | 103.68 | 2003.9730 | 17     | -1.2 | 1002.9926 | 2 | 38.20 | 43       | F43:1989 | OB5956 H1 Ro.raw | 5.9168E6            | 4        | 4                       | 420   | 436 | Methylation(KR)                       | K17:Methylation(KR):1000.00                               | PEAKS PTM |
| K.DLAFPGSGEQVEK.L                                  | N    | 100.93 | 1375.6619 | 13     | -1.9 | 688.8369  | 2 | 30.34 | 43       | F43:1508 | OB5956 H1 Ro.raw | 9.196E7             | 8        | 8                       | 560   | 572 |                                       |                                                           | PEAKS DB  |
| K.NPQLQDLDM(+15.99)MLTC(+57.02)VEIKEGALMLPHFNSK.A  | N    | 100.40 | 3387.6335 | 29     | -0.6 | 1130.2178 | 3 | 37.70 | 41       | F41:1939 | OB5954 H1 Ro.raw | 8.7706E7            | 6        | 6                       | 420   | 448 | Oxidation (M); Carbamidomethylation   | M9:Oxidation (M):26.02;C13:Carbamidomethylation:1000.00   | PEAKS DB  |
| R.RVLLEENAGGEQEER.G                                | N    | 100.35 | 1727.8438 | 15     | 0.2  | 576.9553  | 3 | 25.30 | 42       | F42:1185 | OB5955 H1 Ro.raw | 8.2964E5            | 6        | 6                       | 331   | 345 |                                       |                                                           | PEAKS DB  |
| K.NPQLQDLDMMLTC(+57.02)VEIKEGALMLPHFNSK.A          | N    | 98.85  | 3371.6387 | 29     | -2.7 | 843.9147  | 4 | 38.02 | 43       | F43:1969 | OB5956 H1 Ro.raw | 1.5351E8            | 12       | 12                      | 420   | 448 | Carbamidomethylation                  | C13:Carbamidomethylation:1000.00                          | PEAKS DB  |
| K.KNPQLQDLDMMLTC(+57.02)VEIKEGALMLPHFNSK.A         | N    | 97.96  | 3499.7336 | 30     | -3.9 | 875.9373  | 4 | 36.80 | 41       | F41:1884 | OB5954 H1 Ro.raw | 6.677E6             | 4        | 4                       | 419   | 448 | Carbamidomethylation                  | C14:Carbamidomethylation:1000.00                          | PEAKS DB  |
| R.VLLEEN(+.98)AGGEQEER.G                           | N    | 94.48  | 1572.7267 | 14     | 2.8  | 787.3728  | 2 | 27.46 | 43       | F43:1340 | OB5956 H1 Ro.raw | 6.2395E5            | 3        | 3                       | 332   | 345 | Deamidation (NQ)                      | N6:Deamidation (NQ):121.37                                | PEAKS DB  |
| R.REQEWEIEEEEEEEGSNR.E                             | N    | 93.49  | 2436.9424 | 19     | 0.1  | 813.3215  | 3 | 26.72 | 43       | F43:1292 | OB5956 H1 Ro.raw | 8.6025E5            | 7        | 7                       | 477   | 495 |                                       |                                                           | PEAKS DB  |
| R.NNPFYFPSRR.F                                     | N    | 89.95  | 1296.6364 | 10     | -2.5 | 649.3239  | 2 | 28.89 | 43       | F43:1417 | OB5956 H1 Ro.raw | 1.3445E8            | 22       | 22                      | 172   | 181 |                                       |                                                           | PEAKS DB  |
| K.D(+57.02)LAFPGSGEQVEK.L                          | N    | 88.60  | 1432.6833 | 13     | -0.1 | 717.3489  | 2 | 31.08 | 41       | F41:1535 | OB5954 H1 Ro.raw | 9.7986E5            | 3        | 3                       | 560   | 572 | Carbamidomethylation (DHKE, X@N-term) | D1:Carbamidomethylation (DHKE, X@N-term):131.10           | PEAKS PTM |
| R.IVQIEAKPNTLVLPK.H                                | N    | 88.27  | 1662.0079 | 15     | 0.9  | 832.0120  | 2 | 30.16 | 43       | F43:1505 | OB5956 H1 Ro.raw | 2.8901E7            | 31       | 31                      | 214   | 228 |                                       |                                                           | PEAKS DB  |
| K.EGALMLPHFNSK.A                                   | N    | 88.21  | 1342.6703 | 12     | 2.5  | 672.3441  | 2 | 30.67 | 43       | F43:1529 | OB5956 H1 Ro.raw | 1.4087E7            | 5        | 5                       | 437   | 448 |                                       |                                                           | PEAKS DB  |
| K.NPQLQDLDMM(-48.00)LTC(+57.02)VEIK.E              | N    | 88.05  | 1998.9755 | 17     | 1.9  | 1000.4969 | 2 | 32.85 | 43       | F43:1670 | OB5956 H1 Ro.raw | 5.9032E6            | 3        | 3                       | 420   | 436 | Carbamidomethylation                  | M10:Dethiomethyl:14.02;C13:Carbamidomethylation:1000.00   | PEAKS PTM |
| R.GRREQEWEIEEEEEEEGSNR.E                           | N    | 87.21  | 2650.0649 | 21     | 1.1  | 884.3632  | 3 | 26.73 | 41       | F41:1280 | OB5954 H1 Ro.raw | 7.9956E5            | 6        | 6                       | 475   | 495 |                                       |                                                           | PEAKS DB  |
| R.NNPFYFPSR.R                                      | N    | 86.35  | 1140.5352 | 9      | -0.1 | 571.2748  | 2 | 31.76 | 43       | F43:1593 | OB5956 H1 Ro.raw | 1.7218E7            | 11       | 11                      | 172   | 180 |                                       |                                                           | PEAKS DB  |
| R.EGEQEWGTPGSHVRETSR.N                             | N    | 83.87  | 2169.9675 | 19     | 2.2  | 724.3314  | 3 | 26.51 | 43       | F43:1287 | OB5956 H1 Ro.raw | 5.5466E5            | 3        | 3                       | 153   | 171 |                                       |                                                           | PEAKS DB  |
| K.KNPQLQDLDMMLTC(+57.02)VEIKEGALM(+15.99)LPHFNSK.A | N    | 83.11  | 3515.7285 | 30     | -1.9 | 879.9377  | 4 | 36.03 | 43       | F43:1857 | OB5956 H1 Ro.raw | 6.6263E6            | 3        | 3                       | 419   | 448 | Carbamidomethylation; Oxidation (M)   | C14:Carbamidomethylation:1000.00;M23:Oxidation (M):114.34 | PEAKS DB  |
| total 156 peptides                                 |      |        |           |        |      |           |   |       |          |          |                  |                     |          |                         |       |     |                                       |                                                           |           |



| Peptide                                                    | Uniq | -10lgP | Mass      | Length | ppm  | m/z       | z | RT    | Fraction | Scan     | Source File       | Area Roasted in gel | #Feature | #Feature Roasted in gel | Start | End | PTM                                         | AScore                                                                          | Found By  |
|------------------------------------------------------------|------|--------|-----------|--------|------|-----------|---|-------|----------|----------|-------------------|---------------------|----------|-------------------------|-------|-----|---------------------------------------------|---------------------------------------------------------------------------------|-----------|
| R.NTLEAAFNAEFNEIRR.V                                       | N    | 82.99  | 1893.9332 | 16     | -2.6 | 947.9714  | 2 | 34.11 | 42       | F42:1711 | OB5955 H1 Ro.raw  | 3.0959E8            | 36       | 35                      | 316   | 331 |                                             |                                                                                 | PEAKS DB  |
| K.DLAFPGSGEQVEKLIK.N                                       | N    | 80.89  | 1729.9249 | 16     | -1.6 | 865.9706  | 2 | 33.95 | 30       | F30:1478 | OB5926 H3B Ro.raw | 3.9305E5            | 5        | 4                       | 560   | 575 |                                             |                                                                                 | PEAKS DB  |
| K.EGALM(+15.99)LPHFNSK.A                                   | N    | 80.48  | 1358.6653 | 12     | 1.1  | 680.3406  | 2 | 29.85 | 43       | F43:1485 | OB5956 H1 Ro.raw  | 3.0314E6            | 5        | 5                       | 437   | 448 | Oxidation (M)                               | M5:Oxidation (M):1000.00                                                        | PEAKS DB  |
| K.GTGNLELVAVR.K                                            | N    | 80.39  | 1127.6299 | 11     | -1.3 | 564.8215  | 2 | 30.21 | 41       | F41:1476 | OB5954 H1 Ro.raw  | 2.4706E7            | 5        | 5                       | 458   | 468 |                                             |                                                                                 | PEAKS DB  |
| R.NTLEAAFN(+.98)AEFNEIRR.V                                 | N    | 79.02  | 1894.9172 | 16     | -2.2 | 948.4638  | 2 | 32.35 | 41       | F41:1616 | OB5954 H1 Ro.raw  | 1.3357E6            | 5        | 5                       | 316   | 331 | Deamidation (NQ)                            | N8:Deamidation (NQ):48.12                                                       | PEAKS DB  |
| R.VLLEENAGGEQEER(+14.02).G                                 | N    | 78.92  | 1585.7583 | 14     | 0.7  | 793.8870  | 2 | 27.86 | 41       | F41:1339 | OB5954 H1 Ro.raw  | 1.6341E5            | 3        | 3                       | 332   | 345 | Methylation(KR)                             | R14:Methylation(KR):1000.00                                                     | PEAKS PTM |
| K.GTGNLELVAVRK.E                                           | N    | 78.87  | 1255.7249 | 12     | 0.7  | 628.8701  | 2 | 27.30 | 41       | F41:1322 | OB5954 H1 Ro.raw  | 2.29E7              | 10       | 10                      | 458   | 469 |                                             |                                                                                 | PEAKS DB  |
| R.QFQNLQNHR.I                                              | N    | 78.35  | 1183.5846 | 9      | 0.0  | 592.7996  | 2 | 23.81 | 42       | F42:1102 | OB5955 H1 Ro.raw  | 1.5125E5            | 6        | 6                       | 205   | 213 |                                             |                                                                                 | PEAKS DB  |
| K.K(+57.02)GSEEEGDITNPINLR.E                               | N    | 78.20  | 1827.8962 | 16     | -0.5 | 914.9550  | 2 | 28.83 | 42       | F42:1409 | OB5955 H1 Ro.raw  | 1.3158E5            | 2        | 2                       | 383   | 398 | Carbamidomethylation (DHKE, X@N-term):32.46 | K1:Carbamidomethylation (DHKE, X@N-term):32.46                                  | PEAKS PTM |
| K.NPQLQLDMM(+15.99)LTC(+57.02)VEIKEGALMLPHFNSK.A           | N    | 78.01  | 3387.6335 | 29     | -0.8 | 1130.2175 | 3 | 36.42 | 41       | F41:1862 | OB5954 H1 Ro.raw  | 6.8935E7            | 6        | 6                       | 420   | 448 | Oxidation (M); Carbamidomethylation         | M10:Oxidation (M):24.44;C13:Carbamidomethylation:1000.00                        | PEAKS DB  |
| R.LFEVKPKKKNPQLQLDMMMLTC(+57.02)VEIK.E                     | N    | 77.87  | 3131.6069 | 26     | -4.0 | 1044.8721 | 3 | 34.65 | 42       | F42:1756 | OB5955 H1 Ro.raw  | 5.0788E6            | 4        | 4                       | 411   | 436 | Carbamidomethylation                        | C22:Carbamidomethylation:1000.00                                                | PEAKS DB  |
| K.NPQLQLDLM(+15.99)MLTC(+57.02)VEIKEGALM(+15.99)LPHFNSK.A  | N    | 77.10  | 3403.6284 | 29     | 1.1  | 851.9153  | 4 | 37.51 | 41       | F41:1883 | OB5954 H1 Ro.raw  | 7.3887E6            | 7        | 7                       | 420   | 448 | Oxidation (M); Carbamidomethylation         | M9:Oxidation (M):27.96;C13:Carbamidomethylation:1000.00;M22:Oxidation (M):71.31 | PEAKS DB  |
| R.EETSRN(+.98)NPYFYSRR.F                                   | N    | 75.62  | 1899.8864 | 15     | -0.2 | 634.3026  | 3 | 28.39 | 41       | F41:1381 | OB5954 H1 Ro.raw  | 3.2976E5            | 2        | 2                       | 167   | 181 | Deamidation (NQ)                            | N6:Deamidation (NQ):33.98                                                       | PEAKS DB  |
| R.Q(-17.03)FQNLQNHR.I                                      | N    | 75.35  | 1166.5581 | 9      | -1.2 | 584.2856  | 2 | 28.00 | 43       | F43:1365 | OB5956 H1 Ro.raw  | 4.927E6             | 4        | 4                       | 205   | 213 | Pyro-glu from Q                             | Q1:Pyro-glu from Q:1000.00                                                      | PEAKS PTM |
| K.NPQLQLDLM(+15.99)M(+15.99)LTC(+57.02)VEIKEGALMLPHFNSK.A  | N    | 73.00  | 3403.6284 | 29     | -3.9 | 1135.5457 | 3 | 35.83 | 43       | F43:1849 | OB5956 H1 Ro.raw  | 7.8068E6            | 5        | 5                       | 420   | 448 | Oxidation (M); Carbamidomethylation         | M9:Oxidation (M):54.18;M10:Oxidation (M):63.99;C13:Carbamidomethylation:1000.00 | PEAKS DB  |
| K.KNPQLQLDLM(+15.99)MLTC(+57.02)VEIKEGALM(+15.99)LPHFNSK.A | N    | 72.71  | 3531.7234 | 30     | -1.9 | 883.9364  | 4 | 35.86 | 41       | F41:1821 | OB5954 H1 Ro.raw  | 7.53E5              | 1        | 1                       | 419   | 448 | Carbamidomethylation; Oxidation (M)         | M10:Oxidation (M):17.01;C14:Carbamidomethylation:1000.00                        | PEAKS DB  |
| total 156 peptides                                         |      |        |           |        |      |           |   |       |          |          |                   |                     |          |                         |       |     |                                             |                                                                                 |           |

| Peptide                                            | Uniq | -10lgP | Mass      | Length | ppm  | m/z       | z | RT    | Fraction | Scan     | Source File      | Area Roasted in gel | #Feature | #Feature Roasted in gel | Start | End | PTM                                   | AScore                                                       | Found By  |
|----------------------------------------------------|------|--------|-----------|--------|------|-----------|---|-------|----------|----------|------------------|---------------------|----------|-------------------------|-------|-----|---------------------------------------|--------------------------------------------------------------|-----------|
|                                                    |      |        |           |        |      |           |   |       |          |          |                  |                     |          |                         |       |     |                                       | 00;M23:Oxidation (M):85.25                                   |           |
| R.VLLEENAGGEQEERGQR.R                              | N    | 72.44  | 1912.9238 | 17     | 0.6  | 957.4698  | 2 | 25.30 | 42       | F42:1191 | OB5955 H1 Ro.raw | 3.1353E6            | 8        | 8                       | 332   | 348 |                                       |                                                              | PEAKS DB  |
| E.VSKEHVEELTK.H                                    | N    | 72.42  | 1297.6877 | 11     | -0.3 | 649.8510  | 2 | 24.21 | 41       | F41:1125 | OB5954 H1 Ro.raw | 2.2246E5            | 5        | 5                       | 365   | 375 |                                       |                                                              | PEAKS DB  |
| K.QAKDLAFPGSGEQVEK.L                               | N    | 72.39  | 1702.8525 | 16     | 1.2  | 568.6255  | 3 | 27.08 | 43       | F43:1321 | OB5956 H1 Ro.raw | 2.8232E5            | 6        | 6                       | 557   | 572 |                                       |                                                              | PEAKS DB  |
| K.EGALMLPHFN(+.98)SK.A                             | N    | 71.37  | 1343.6543 | 12     | 2.6  | 672.8362  | 2 | 31.66 | 43       | F43:1595 | OB5956 H1 Ro.raw | 1.0101E5            | 2        | 2                       | 437   | 448 | Deamidation (NQ)                      | N10:Deamidation (NQ):100.0.00                                | PEAKS DB  |
| R.EQEW(+15.99)EEEEDEEEEGSNR.E                      | N    | 70.36  | 2296.8362 | 18     | 3.2  | 1149.4291 | 2 | 27.67 | 41       | F41:1333 | OB5954 H1 Ro.raw | 1.024E6             | 3        | 3                       | 478   | 495 | Oxidation (HW)                        | W4:Oxidation (H W):1000.00                                   | PEAKS PTM |
| R.N(+.98)TLEAAFNAEFNEIRR.V                         | N    | 69.73  | 1894.9172 | 16     | 0.4  | 948.4662  | 2 | 32.39 | 42       | F42:1620 | OB5955 H1 Ro.raw | 2.6319E6            | 3        | 3                       | 316   | 331 | Deamidation (NQ)                      | N1:Deamidation (N Q):41.52                                   | PEAKS DB  |
| R.LFEVKPDKKNPQLQDLDDMM(+15.99)LTC(+57.02)VEIK.E    | N    | 69.17  | 3147.6018 | 26     | 2.2  | 787.9095  | 4 | 33.24 | 42       | F42:1670 | OB5955 H1 Ro.raw | 2.0797E6            | 2        | 2                       | 411   | 436 | Oxidation (M); Carbamidomethylation   | M19:Oxidation (M): 40.00;C2 2:Carbamidomethylation:1000.00   | PEAKS DB  |
| R.EGEQEWGTPGSH(+15.99)VR.E                         | N    | 68.71  | 1583.6964 | 14     | 0.8  | 792.8561  | 2 | 27.64 | 43       | F43:1358 | OB5956 H1 Ro.raw | 1.1836E5            | 4        | 4                       | 153   | 166 | Oxidation (HW)                        | H12:Oxidation (H W):95.51                                    | PEAKS PTM |
| R.I(+57.02)VQIEAKPNTLVLPK.H                        | N    | 68.01  | 1719.0294 | 15     | -3.7 | 860.5188  | 2 | 30.87 | 43       | F43:1547 | OB5956 H1 Ro.raw | 7.3731E5            | 5        | 4                       | 214   | 228 | Carbamidomethylation (DHKE, X@N-term) | I1:Carbamidomethylation (D HKE, X@N-term):109.97             | PEAKS PTM |
| R.RVLLEEN(+.98)AGGEQEER.G                          | N    | 67.83  | 1728.8278 | 15     | -0.8 | 577.2827  | 3 | 25.96 | 42       | F42:1233 | OB5955 H1 Ro.raw | 1.359E4             | 2        | 2                       | 331   | 345 | Deamidation (NQ)                      | N7:Deamidation (N Q):77.53                                   | PEAKS DB  |
| R.DQS(-18.01)SYLQGFSR.N                            | N    | 67.70  | 1268.5785 | 11     | 0.2  | 635.2966  | 2 | 30.91 | 41       | F41:1537 | OB5954 H1 Ro.raw | 6.4401E5            | 3        | 3                       | 305   | 315 | Dehydration                           | S3:Dehydration:40.00                                         | PEAKS PTM |
| R.RVLLEENAGGEQEERGQR.R                             | N    | 67.67  | 2069.0249 | 18     | 1.9  | 690.6835  | 3 | 25.60 | 41       | F41:1205 | OB5954 H1 Ro.raw | 1.8247E6            | 3        | 3                       | 331   | 348 |                                       |                                                              | PEAKS DB  |
| K.Q(-17.03)AKDLAFPGSGEQVEK.L                       | N    | 67.52  | 1685.8260 | 16     | 0.1  | 843.9204  | 2 | 29.98 | 43       | F43:1503 | OB5956 H1 Ro.raw | 9.9003E4            | 3        | 3                       | 557   | 572 | Pyro-glu from Q                       | Q1:Pyro-glu from Q:1000.00                                   | PEAKS PTM |
| K.NPQLQ(+.98)DLDDMLTLC(+57.02)VEIK.E               | N    | 67.25  | 2047.9629 | 17     | 1.5  | 1024.9902 | 2 | 44.46 | 43       | F43:2348 | OB5956 H1 Ro.raw | 0                   | 0        | 0                       | 420   | 436 | Carbamidomethylation                  | Q5:Deamidation (N Q):19.68; C13:Carbamidomethylation:1000.00 | PEAKS DB  |
| R.WGPAGPR.E                                        | N    | 66.93  | 739.3765  | 7      | 1.0  | 370.6959  | 2 | 25.22 | 41       | F41:1191 | OB5954 H1 Ro.raw | 3.1676E5            | 3        | 3                       | 115   | 121 |                                       |                                                              | PEAKS DB  |
| K.KNPQLQDLDDMLTLCVEIK(+14.02).E                    | N    | 66.06  | 2132.0679 | 18     | -0.6 | 1067.0405 | 2 | 36.31 | 41       | F41:1858 | OB5954 H1 Ro.raw | 5.2356E5            | 2        | 2                       | 419   | 436 | Methylation(KR)                       | K18:Methylation(K R):130.57                                  | PEAKS PTM |
| R.EETSRNNPFYFPSRR.F                                | N    | 65.61  | 1898.9023 | 15     | 1.8  | 633.9759  | 3 | 27.75 | 42       | F42:1339 | OB5955 H1 Ro.raw | 8.693E5             | 4        | 4                       | 167   | 181 |                                       |                                                              | PEAKS DB  |
| K.NPQLQDLDDMLTLC(+57.02)VEIKEGALM(+15.99)LPHFNSK.A | N    | 64.76  | 3387.6335 | 29     | -0.6 | 847.9152  | 4 | 37.63 | 43       | F43:1915 | OB5956 H1 Ro.raw | 8.7706E7            | 6        | 6                       | 420   | 448 | Carbamidomethylation; Oxidation (M)   | C13:Carbamidomethylation:1000.00;M                           | PEAKS DB  |
| total 156 peptides                                 |      |        |           |        |      |           |   |       |          |          |                  |                     |          |                         |       |     |                                       |                                                              |           |

| Peptide                                                           | Uniq | -10lgP | Mass      | Length | ppm  | m/z      | z | RT    | Fraction | Scan     | Source File      | Area Roasted in gel | #Feature | #Feature Roasted in gel | Start | End | PTM                                   | AScore                                                                                                        | Found By  |
|-------------------------------------------------------------------|------|--------|-----------|--------|------|----------|---|-------|----------|----------|------------------|---------------------|----------|-------------------------|-------|-----|---------------------------------------|---------------------------------------------------------------------------------------------------------------|-----------|
|                                                                   |      |        |           |        |      |          |   |       |          |          |                  |                     |          |                         |       |     |                                       | 22:Oxidation (M):82.05                                                                                        |           |
| A.FPGSGEQVEK.L                                                    | N    | 64.10  | 1076.5138 | 10     | -3.4 | 539.2623 | 2 | 30.29 | 42       | F42:1495 | OB5955 H1 Ro.raw | 4.0412E5            | 3        | 3                       | 563   | 572 |                                       |                                                                                                               | PEAKS DB  |
| R.SRQFQNLQNH.R.I                                                  | N    | 63.98  | 1426.7178 | 11     | 0.3  | 476.5800 | 3 | 24.16 | 43       | F43:1148 | OB5956 H1 Ro.raw | 5.7314E4            | 3        | 3                       | 203   | 213 |                                       |                                                                                                               | PEAKS DB  |
| R.LFEVKPDKK.N                                                     | N    | 63.79  | 1102.6385 | 9      | 0.6  | 552.3269 | 2 | 24.50 | 43       | F43:1159 | OB5956 H1 Ro.raw | 1.1348E6            | 6        | 6                       | 411   | 419 |                                       |                                                                                                               | PEAKS DB  |
| Q.SSYLQGFSR.N                                                     | N    | 63.16  | 1043.5035 | 9      | 1.4  | 522.7598 | 2 | 29.29 | 41       | F41:1438 | OB5954 H1 Ro.raw | 6.2708E4            | 3        | 3                       | 307   | 315 |                                       |                                                                                                               | PEAKS DB  |
| R.QFQNLQN(+.98)HR.I                                               | N    | 63.09  | 1184.5686 | 9      | 5.4  | 593.2948 | 2 | 23.60 | 43       | F43:1114 | OB5956 H1 Ro.raw | 8.0412E2            | 1        | 1                       | 205   | 213 |                                       | N7:Deamidation (NQ):0.00                                                                                      | PEAKS DB  |
| K.EGALMLPH(+14.02)FNSK.A                                          | N    | 63.06  | 1356.6860 | 12     | -4.2 | 679.3475 | 2 | 30.85 | 43       | F43:1554 | OB5956 H1 Ro.raw | 2.9707E5            | 3        | 3                       | 437   | 448 | Methylation(others)                   | H8:Methylation(others):65.81                                                                                  | PEAKS PTM |
| K.NPQLQLDMM(+15.99)LTC(+57.02)VEIKEGALM(+15.99)LPHFNSK.A          | N    | 61.19  | 3403.6284 | 29     | 0.3  | 851.9147 | 4 | 35.86 | 41       | F41:1801 | OB5954 H1 Ro.raw | 3.4294E6            | 4        | 4                       | 420   | 448 | Oxidation (M); Carbamidomethylation   | M10:Oxidation (M):21.94;C13:Carbamidomethylation:1000.00;M22:Oxidation (M):61.50                              | PEAKS DB  |
| K.G(+57.02)TGNLELVAVRK.E                                          | N    | 60.73  | 1312.7462 | 12     | -0.4 | 657.3801 | 2 | 27.30 | 41       | F41:1303 | OB5954 H1 Ro.raw | 3.6978E5            | 2        | 2                       | 458   | 469 | Carbamidomethylation (DHKE, X@N-term) | G1:Carbamidomethylation (DHKE, X@N-term):55.46                                                                | PEAKS PTM |
| R.EQEWEEEEEEEEGSNREVR.R.Y                                         | N    | 60.58  | 2821.1545 | 22     | 1.9  | 941.3939 | 3 | 26.71 | 43       | F43:1297 | OB5956 H1 Ro.raw | 1.0274E6            | 4        | 4                       | 478   | 499 |                                       |                                                                                                               | PEAKS DB  |
| K.NPQLQLDLM(+15.99)M(+15.99)LTC(+57.02)VEIKEGALM(+15.99)LPHFNSK.A | N    | 60.17  | 3419.6233 | 29     | -0.9 | 855.9124 | 4 | 34.83 | 42       | F42:1766 | OB5955 H1 Ro.raw | 1.2322E6            | 3        | 3                       | 420   | 448 | Oxidation (M); Carbamidomethylation   | M9:Oxidation (M):1000.00;M10:Oxidation (M):1000.00;C13:Carbamidomethylation:1000.00;M22:Oxidation (M):1000.00 | PEAKS DB  |
| R.LFEVKPDKKNPQLQ(+.98)DLMM(+15.99)LTC(+57.02)VEIK.E               | N    | 59.38  | 3148.5857 | 26     | 7.4  | 788.1595 | 4 | 33.17 | 42       | F42:1670 | OB5955 H1 Ro.raw | 3.9804E5            | 1        | 1                       | 411   | 436 | Oxidation (M); Carbamidomethylation   | Q14:Deamidation (NQ):0.00;M19:Oxidation (M):23.10;C22:Carbamidomethylation:1000.00                            | PEAKS DB  |
| R.VLLEEN(-17.03)AGGEQEER.G                                        | N    | 59.22  | 1554.7162 | 14     | 1.2  | 778.3663 | 2 | 27.73 | 42       | F42:1335 | OB5955 H1 Ro.raw | 0                   | 0        | 0                       | 332   | 345 | Ammonia-loss (N)                      | N6:Ammonia-loss (N):1000.00                                                                                   | PEAKS PTM |
| K.GSE(+57.02)EEGDITNPINLR.E                                       | N    | 58.95  | 1699.8013 | 15     | -3.0 | 850.9054 | 2 | 30.85 | 43       | F43:1556 | OB5956 H1 Ro.raw | 4.2816E4            | 1        | 1                       | 384   | 398 |                                       | E3:Carbamidomethylation (DHKE, X@N-term):0.00                                                                 | PEAKS PTM |
| total 156 peptides                                                |      |        |           |        |      |          |   |       |          |          |                  |                     |          |                         |       |     |                                       |                                                                                                               |           |

| Peptide                                                | Uniq | -10lgP | Mass      | Length | ppm  | m/z      | z | RT    | Fraction | Scan     | Source File       | Area Roasted in gel | #Feature | #Feature Roasted in gel | Start | End | PTM                                                    | AScore                                                                    | Found By  |
|--------------------------------------------------------|------|--------|-----------|--------|------|----------|---|-------|----------|----------|-------------------|---------------------|----------|-------------------------|-------|-----|--------------------------------------------------------|---------------------------------------------------------------------------|-----------|
| R.LFEVKPDK.K                                           | N    | 58.71  | 974.5436  | 8      | 1.7  | 488.2799 | 2 | 25.30 | 42       | F42:1183 | OB5955 H1 Ro.raw  | 1.7315E6            | 6        | 6                       | 411   | 418 |                                                        |                                                                           | PEAKS DB  |
| R.N(+57.02)NPFYFPSRR.F                                 | N    | 58.56  | 1353.6577 | 10     | 1.1  | 677.8369 | 2 | 29.74 | 42       | F42:1453 | OB5955 H1 Ro.raw  | 9.24E5              | 3        | 3                       | 172   | 181 | Carbamidomethylation (DHKE, X@N-term)                  | N1:Carbamidomethylation (DHKE, X@N-term):1000.00                          | PEAKS PTM |
| R.E(-18.01)GE(+57.02)QEWGTPGSHVR.E                     | N    | 58.23  | 1606.7124 | 14     | 0.2  | 804.3636 | 2 | 27.56 | 42       | F42:1323 | OB5955 H1 Ro.raw  | 2.2302E5            | 3        | 3                       | 153   | 166 | Pyro-glu from E; Carbamidomethylation (DHKE, X@N-term) | E1:Pyro-glu from E:1000.00;E3:Carbamidomethylation (DHKE, X@N-term):60.92 | PEAKS PTM |
| K.G(+57.02)TGNLELVAVR.K                                | N    | 57.51  | 1184.6514 | 11     | -2.7 | 593.3314 | 2 | 30.10 | 42       | F42:1486 | OB5955 H1 Ro.raw  | 1.7196E5            | 2        | 2                       | 458   | 468 |                                                        | G1:Carbamidomethylation (DHKE, X@N-term):19.78                            | PEAKS PTM |
| N.PFYFPSRR.F                                           | N    | 57.34  | 1068.5504 | 8      | 1.1  | 535.2831 | 2 | 28.95 | 41       | F41:1414 | OB5954 H1 Ro.raw  | 4.6082E6            | 5        | 5                       | 174   | 181 |                                                        |                                                                           | PEAKS DB  |
| K.SVSKKGSEEGDITNPINLR.E                                | N    | 57.26  | 2172.1023 | 20     | 0.9  | 725.0420 | 3 | 27.48 | 41       | F41:1325 | OB5954 H1 Ro.raw  | 1.6504E5            | 2        | 2                       | 379   | 398 |                                                        |                                                                           | PEAKS DB  |
| R.LFEVKPDKKNPQLQLDLM(+15.99)MLTC(+57.02)VEIK.E         | N    | 57.09  | 3147.6018 | 26     | -1.9 | 787.9062 | 4 | 34.20 | 41       | F41:1734 | OB5954 H1 Ro.raw  | 2.4894E6            | 4        | 4                       | 411   | 436 | Oxidation (M); Carbamidomethylation                    | M18:Oxidation (M):33.98;C22:Carbamidomethylation:1000.00                  | PEAKS DB  |
| K.IRPEGREGEQEWGTPGSHVR.E                               | N    | 56.62  | 2276.1045 | 20     | 0.5  | 570.0337 | 4 | 27.56 | 42       | F42:1329 | OB5955 H1 Ro.raw  | 8.9716E4            | 2        | 2                       | 147   | 166 |                                                        |                                                                           | PEAKS DB  |
| R.NTLEAAFNAEFN(+.98)EIRR.V                             | N    | 54.77  | 1894.9172 | 16     | 1.8  | 948.4676 | 2 | 33.04 | 43       | F43:1685 | OB5956 H1 Ro.raw  | 2.2573E6            | 5        | 5                       | 316   | 331 | Deamidation (NQ)                                       | N12:Deamidation (NQ):39.02                                                | PEAKS DB  |
| K.HADADNILVIQQGQATVTVANGNNR.R                          | N    | 53.13  | 2618.3162 | 25     | 0.5  | 873.7798 | 3 | 30.34 | 38       | F38:1426 | OB5951 H3A Ro.raw | 1.8654E3            | 1        | 1                       | 229   | 253 |                                                        |                                                                           | PEAKS DB  |
| R.IVQIEAK(+57.02)PNTLVLPK.H                            | N    | 53.06  | 1719.0294 | 15     | -1.6 | 860.5206 | 2 | 30.29 | 43       | F43:1512 | OB5956 H1 Ro.raw  | 2.587E5             | 1        | 1                       | 214   | 228 | Carbamidomethylation (DHKE, X@N-term)                  | K7:Carbamidomethylation (DHKE, X@N-term):25.69                            | PEAKS PTM |
| R.IVQIEAKPN.T                                          | N    | 52.62  | 1010.5760 | 9      | -0.3 | 506.2951 | 2 | 25.40 | 42       | F42:1199 | OB5955 H1 Ro.raw  | 0                   | 0        | 0                       | 214   | 222 |                                                        |                                                                           | PEAKS DB  |
| K.KNPQLQ(+.98)DLDMMLTC(+57.02)VEIKEGALMLPHFNSK.A       | N    | 51.97  | 3500.7175 | 30     | 3.4  | 876.1896 | 4 | 36.93 | 43       | F43:1903 | OB5956 H1 Ro.raw  | 9.2646E6            | 2        | 2                       | 419   | 448 | Carbamidomethylation                                   | Q6:Deamidation (NQ):14.04;Q14:Carbamidomethylation:1000.00                | PEAKS DB  |
| R.E(-18.01)GEQEWGTPGSHVR.E                             | N    | 51.90  | 1549.6909 | 14     | 0.7  | 775.8533 | 2 | 27.75 | 42       | F42:1342 | OB5955 H1 Ro.raw  | 3.4987E5            | 3        | 3                       | 153   | 166 | Pyro-glu from E                                        | E1:Pyro-glu from E:1000.00                                                | PEAKS PTM |
| K.NPQLQLDMM(+15.99)LTC(+57.02)VEIKEGALMLPHFN(+.98)SK.A | N    | 49.99  | 3388.6174 | 29     | 6.1  | 848.1668 | 4 | 36.39 | 43       | F43:1880 | OB5956 H1 Ro.raw  | 1.7975E6            | 1        | 1                       | 420   | 448 | Oxidation (M); Carbamidomethylation                    | M10:Oxidation (M):27.96;C13:Carbamidomethylation:1000.00;N27:Deamidation  | PEAKS DB  |
| total 156 peptides                                     |      |        |           |        |      |          |   |       |          |          |                   |                     |          |                         |       |     |                                                        |                                                                           |           |

| Peptide                                                    | Uniq | -10lgP | Mass      | Length | ppm  | m/z       | z | RT    | Fraction | Scan     | Source File      | Area Roasted in gel | #Feature | #Feature Roasted in gel | Start | End | PTM                                       | AScore                                                                          | Found By  |
|------------------------------------------------------------|------|--------|-----------|--------|------|-----------|---|-------|----------|----------|------------------|---------------------|----------|-------------------------|-------|-----|-------------------------------------------|---------------------------------------------------------------------------------|-----------|
|                                                            |      |        |           |        |      |           |   |       |          |          |                  |                     |          |                         |       |     |                                           | n (NQ):18.27                                                                    |           |
| R.N(-17.03)NPFYFPSRR.F                                     | N    | 49.99  | 1279.6097 | 10     | 1.1  | 427.5443  | 3 | 28.89 | 43       | F43:1434 | OB5956 H1 Ro.raw | 5.674E5             | 3        | 3                       | 172   | 181 |                                           | N1:Ammونيا-loss (N):9.34                                                        | PEAKS PTM |
| R.EQEWEIEEEEEEEGSNREVR.R                                   | N    | 49.84  | 2665.0535 | 21     | 2.4  | 889.3605  | 3 | 27.88 | 41       | F41:1353 | OB5954 H1 Ro.raw | 4.9786E4            | 1        | 1                       | 478   | 498 |                                           |                                                                                 | PEAKS DB  |
| T.GNLELVAVRK.E                                             | N    | 49.53  | 1097.6556 | 10     | 0.5  | 549.8354  | 2 | 27.00 | 42       | F42:1296 | OB5955 H1 Ro.raw | 3.4872E5            | 3        | 3                       | 460   | 469 |                                           |                                                                                 | PEAKS DB  |
| F.PGSGEQVEK.L                                              | N    | 49.06  | 929.4454  | 9      | -3.7 | 465.7282  | 2 | 30.34 | 43       | F43:1524 | OB5956 H1 Ro.raw | 5.2705E4            | 1        | 1                       | 564   | 572 |                                           |                                                                                 | PEAKS DB  |
| R.EEDWRQPR.E                                               | N    | 48.87  | 1114.5155 | 8      | 1.8  | 558.2661  | 2 | 23.91 | 41       | F41:1112 | OB5954 H1 Ro.raw | 1.6791E3            | 1        | 1                       | 126   | 133 |                                           |                                                                                 | PEAKS DB  |
| K.PNTLVLPK.H                                               | N    | 48.84  | 880.5382  | 8      | -2.9 | 441.2751  | 2 | 28.00 | 43       | F43:1374 | OB5956 H1 Ro.raw | 1.9234E5            | 2        | 2                       | 221   | 228 |                                           |                                                                                 | PEAKS DB  |
| R.EGEQEW(+15.99)GTPGSHVR.E                                 | N    | 47.73  | 1583.6964 | 14     | -0.6 | 792.8550  | 2 | 25.22 | 41       | F41:1196 | OB5954 H1 Ro.raw | 2.0714E4            | 1        | 1                       | 153   | 166 | Oxidation (HW)                            | W6:Oxidation (HW):72.73                                                         | PEAKS PTM |
| V.QIEAKPNTLVLPK.H                                          | N    | 47.49  | 1449.8555 | 13     | -3.8 | 725.9323  | 2 | 30.34 | 43       | F43:1513 | OB5956 H1 Ro.raw | 4.7367E4            | 1        | 1                       | 216   | 228 |                                           |                                                                                 | PEAKS DB  |
| R.N(+.98)TLEAAFNAEFNEIR.R                                  | N    | 46.63  | 1738.8162 | 15     | 9.2  | 870.4233  | 2 | 44.36 | 42       | F42:2303 | OB5955 H1 Ro.raw | 5.4416E3            | 1        | 1                       | 316   | 330 | Deamidation (NQ)                          | N1:Deamidation (NQ):39.47                                                       | PEAKS DB  |
| R.VLLE(+21.98)ENAGGEQEER.G                                 | N    | 46.37  | 1593.7246 | 14     | -1.1 | 797.8687  | 2 | 26.71 | 43       | F43:1300 | OB5956 H1 Ro.raw | 4.0134E5            | 3        | 3                       | 332   | 345 | Sodium adduct                             | E4:Sodium adduct:40.00                                                          | PEAKS PTM |
| N.PFYFPSR.R                                                | N    | 46.32  | 912.4493  | 7      | -0.1 | 457.2319  | 2 | 31.70 | 42       | F42:1584 | OB5955 H1 Ro.raw | 2.4653E5            | 4        | 4                       | 174   | 180 |                                           |                                                                                 | PEAKS DB  |
| K.GTGNLELVAVRKEQQQR.G                                      | N    | 46.31  | 1925.0442 | 17     | 1.4  | 642.6896  | 3 | 26.67 | 43       | F43:1294 | OB5956 H1 Ro.raw | 2.1018E4            | 1        | 1                       | 458   | 474 |                                           |                                                                                 | PEAKS DB  |
| K.NPQLQDLD(+14.02)MMLTC(+57.02)VEIK.E                      | N    | 45.99  | 2060.9944 | 17     | 0.2  | 1031.5046 | 2 | 37.33 | 41       | F41:1934 | OB5954 H1 Ro.raw | 2.7407E4            | 1        | 1                       | 420   | 436 | Methylation(others); Carbamidomethylation | D8:Methylation(others):42.68; C13:Carbamidomethylation:1000.00                  | PEAKS PTM |
| E.VSKEH(+15.99)VEELTK.H                                    | N    | 45.89  | 1313.6826 | 11     | 0.8  | 657.8491  | 2 | 24.35 | 43       | F43:1164 | OB5956 H1 Ro.raw | 1.7904E4            | 3        | 3                       | 365   | 375 | Oxidation (HW)                            | H5:Oxidation (HW):1000.00                                                       | PEAKS PTM |
| K.GTGNLE(+57.02)LVAVRK.E                                   | N    | 45.75  | 1312.7462 | 12     | -0.8 | 657.3799  | 2 | 27.17 | 42       | F42:1295 | OB5955 H1 Ro.raw | 1.9882E5            | 1        | 1                       | 458   | 469 |                                           | E6:Carbamidomethylation (DHKE, X@N-term):0.00                                   | PEAKS PTM |
| R.VLLEEN(+.98)AGGEQEERGQR.R                                | N    | 45.60  | 1913.9078 | 17     | -1.6 | 638.9755  | 3 | 25.99 | 41       | F41:1234 | OB5954 H1 Ro.raw | 0                   | 0        | 0                       | 332   | 348 | Deamidation (NQ)                          | N6:Deamidation (NQ):28.79                                                       | PEAKS DB  |
| K.KNPQLQDLDMM(+15.99)LTC(+57.02)VEIKEGALM(+15.99)LPHFNSK.A | N    | 45.45  | 3531.7234 | 30     | -1.1 | 883.9372  | 4 | 35.80 | 42       | F42:1822 | OB5955 H1 Ro.raw | 0                   | 0        | 0                       | 419   | 448 | Carbamidomethylation; Oxidation (M)       | M11:Oxidation (M):0.00;C14:Carbamidomethylation:1000.00;M23:Oxidation (M):45.87 | PEAKS DB  |
| R.LFEVKPDKKNPQLQDLDM(+15.99)M(+15.99)LTC(+57.02)VEIK.E     | N    | 45.43  | 3163.5967 | 26     | -2.8 | 791.9042  | 4 | 32.90 | 41       | F41:1650 | OB5954 H1 Ro.raw | 2.0535E6            | 3        | 3                       | 411   | 436 | Oxidation (M); Carbamidomethylation       | M18:Oxidation (M):1000.00; M19:Oxidation (M):                                   | PEAKS DB  |
| total 156 peptides                                         |      |        |           |        |      |           |   |       |          |          |                  |                     |          |                         |       |     |                                           |                                                                                 |           |

| Peptide                                                        | Uniq | -10lgP | Mass      | Length | ppm  | m/z       | z | RT    | Fraction | Scan     | Source File      | Area Roasted in gel | #Feature | #Feature Roasted in gel | Start | End | PTM                                                   | AScore                                                                                                     | Found By  |
|----------------------------------------------------------------|------|--------|-----------|--------|------|-----------|---|-------|----------|----------|------------------|---------------------|----------|-------------------------|-------|-----|-------------------------------------------------------|------------------------------------------------------------------------------------------------------------|-----------|
|                                                                |      |        |           |        |      |           |   |       |          |          |                  |                     |          |                         |       |     |                                                       | 1000.00;C22:Carbamidomethylation:1000.00                                                                   |           |
| K.KNPQLQDLDM(+15.99)MLTC(+57.02)VEIKEGALMLPHFNSK.A             | N    | 44.60  | 3515.7285 | 30     | -1.9 | 879.9377  | 4 | 35.30 | 41       | F41:1798 | OB5954 H1 Ro.raw | 6.4162E5            | 1        | 1                       | 419   | 448 | Carbamidomethylation                                  | M10:Oxidation (M):14.02;C14:Carbamidomethylation:1000.00                                                   | PEAKS DB  |
| R.DQSSYLQGFSR(+15.99).N                                        | N    | 44.15  | 1302.5840 | 11     | 2.5  | 652.3009  | 2 | 30.79 | 43       | F43:1544 | OB5956 H1 Ro.raw | 1.4308E5            | 3        | 3                       | 305   | 315 | Oxidation or Hydroxylation                            | R11:Oxidation or Hydroxylation:42.88                                                                       | PEAKS PTM |
| R.Q(+.98)FQNLQNHR.I                                            | N    | 43.70  | 1184.5686 | 9      | 4.6  | 593.2943  | 2 | 23.68 | 42       | F42:1098 | OB5955 H1 Ro.raw | 0                   | 0        | 0                       | 205   | 213 | Deamidation (NQ)                                      | Q1:Deamidation (NQ):39.25                                                                                  | PEAKS DB  |
| K.NPQLQDLDM(+15.99)LTC(+57.02)VEIKEGALM(+15.99)LPHFN(+.98)SK.A | N    | 41.25  | 3404.6125 | 29     | -0.4 | 1135.8777 | 3 | 36.69 | 42       | F42:1878 | OB5955 H1 Ro.raw | 3.8423E5            | 1        | 1                       | 420   | 448 | Carbamidomethylation; Oxidation (M); Deamidation (NQ) | M10:Oxidation (M):0.00;C13:Carbamidomethylation:1000.00;M22:Oxidation (M):39.23;N27:Deamidation (NQ):69.52 | PEAKS DB  |
| R.IFLAGDKDNVVD(+17.03)QIEK.Q                                   | Y    | 41.19  | 1819.9679 | 16     | -3.9 | 607.6609  | 3 | 32.67 | 43       | F43:1692 | OB5956 H1 Ro.raw | 3.5399E6            | 2        | 2                       | 541   | 556 |                                                       | D12:Replacement of proton with ammonium ion:16.65                                                          | PEAKS PTM |
| R.REQEW(+15.99)EEEEEEEEEGSNR.E                                 | N    | 41.18  | 2452.9375 | 19     | -0.6 | 818.6526  | 3 | 25.98 | 41       | F41:1239 | OB5954 H1 Ro.raw | 2.4114E4            | 1        | 1                       | 477   | 495 | Oxidation (HW)                                        | W5:Oxidation (HW):1000.00                                                                                  | PEAKS PTM |
| K.DLAFF(+15.99)GSGEQVEK.L                                      | N    | 41.14  | 1391.6569 | 13     | 0.5  | 696.8361  | 2 | 29.36 | 42       | F42:1432 | OB5955 H1 Ro.raw | 7.4528E5            | 3        | 3                       | 560   | 572 | Oxidation or Hydroxylation                            | P5:Oxidation or Hydroxylation:67.76                                                                        | PEAKS PTM |
| K.EGALM(-48.00)LPHFNSK.A                                       | N    | 40.53  | 1294.6670 | 12     | 0.5  | 432.5632  | 3 | 28.76 | 41       | F41:1389 | OB5954 H1 Ro.raw | 2.208E6             | 2        | 2                       | 437   | 448 | Dethiomethyl                                          | M5:Dethiomethyl:1000.00                                                                                    | PEAKS PTM |
| R.IVQ(+.98)IEAKPNTLVLPK.H                                      | N    | 40.35  | 1662.9919 | 15     | 8.1  | 832.5100  | 2 | 30.29 | 42       | F42:1514 | OB5955 H1 Ro.raw | 3.5627E6            | 1        | 1                       | 214   | 228 | Deamidation (NQ)                                      | Q3:Deamidation (NQ):22.65                                                                                  | PEAKS DB  |
| R.VLLEENAGGEQEERGQRR.W                                         | N    | 40.17  | 2069.0249 | 18     | 1.0  | 518.2640  | 4 | 25.49 | 42       | F42:1205 | OB5955 H1 Ro.raw | 2.0305E5            | 2        | 2                       | 332   | 349 |                                                       |                                                                                                            | PEAKS DB  |
| R.VLLEENAGGEQEER(+15.99).G                                     | N    | 39.98  | 1587.7375 | 14     | 1.8  | 794.8775  | 2 | 26.70 | 41       | F41:1275 | OB5954 H1 Ro.raw | 0                   | 0        | 0                       | 332   | 345 | Oxidation or Hydroxylation                            | R14:Oxidation or Hydroxylation:20.88                                                                       | PEAKS PTM |
| R.N(+27.99)TLEAAFNAEFNEIRR.V                                   | N    | 39.68  | 1921.9282 | 16     | -1.7 | 961.9697  | 2 | 37.51 | 41       | F41:1908 | OB5954 H1 Ro.raw | 3.7767E4            | 1        | 1                       | 316   | 331 | Formylation                                           | N1:Formylation:1000.00                                                                                     | PEAKS PTM |
| K.E(-18.01)GALM(+15.99)LPHFNSK.A                               | N    | 39.64  | 1340.6547 | 12     | 0.2  | 447.8923  | 3 | 30.21 | 41       | F41:1479 | OB5954 H1 Ro.raw | 7.81E5              | 1        | 1                       | 437   | 448 | Pyro-glu from E; Oxidation (M)                        | E1:Pyro-glu from E:1000.00; M5:Oxidation (M):1000.00                                                       | PEAKS PTM |
| R.VLLEE(+53.92)NAGGEQEER.G                                     | N    | 39.58  | 1625.6620 | 14     | -1.0 | 542.8940  | 3 | 26.76 | 42       | F42:1278 | OB5955 H1 Ro.raw | 0                   | 0        | 0                       | 332   | 345 | Replacement of 2 protons by iron                      | E5:Replacement of 2 protons by iron:20.92                                                                  | PEAKS PTM |
| total 156 peptides                                             |      |        |           |        |      |           |   |       |          |          |                  |                     |          |                         |       |     |                                                       |                                                                                                            |           |

| Peptide                                                          | Uniq | -10lgP | Mass      | Length | ppm  | m/z       | z | RT    | Fraction | Scan     | Source File      | Area Roasted in gel | #Feature | #Feature Roasted in gel | Start | End | PTM                                    | AScore                                                                                                         | Found By  |
|------------------------------------------------------------------|------|--------|-----------|--------|------|-----------|---|-------|----------|----------|------------------|---------------------|----------|-------------------------|-------|-----|----------------------------------------|----------------------------------------------------------------------------------------------------------------|-----------|
| K.NPQLQ(+.98)DLDDMM(+15.99)LTC(+57.02)VEIKEGALM(+15.99)LPHFNSK.A | N    | 39.15  | 3404.6125 | 29     | -1.8 | 852.1589  | 4 | 38.22 | 43       | F43:1993 | OB5956 H1 Ro.raw | 7.6266E5            | 1        | 1                       | 420   | 448 | Deamidation (NQ); Carbamidomethylation | Q5:Deamidation (N Q):49.79; M10:Oxidation (M):0.00;C13:Carbamidomethylation:1000.00;M22:Oxidation (M):14.60    | PEAKS DB  |
| K.N(+.98)PQLQDLDM(+15.99)MLTC(+57.02)VEIKEGALMLPHFNSK.A          | N    | 38.83  | 3388.6174 | 29     | 8.2  | 1695.3300 | 2 | 37.72 | 41       | F41:1941 | OB5954 H1 Ro.raw | 6.4698E5            | 1        | 1                       | 420   | 448 | Carbamidomethylation                   | N1:Deamidation (N Q):0.00;M9:Oxidation (M):0.00;C13:Carbamidomethylation:1000.00                               | PEAKS DB  |
| K.D(+15.99)LAFFPGSGEQVEK.L                                       | N    | 38.81  | 1391.6569 | 13     | 0.5  | 696.8361  | 2 | 29.36 | 42       | F42:1368 | OB5955 H1 Ro.raw | 2.5725E5            | 1        | 1                       | 560   | 572 | Oxidation or Hydroxylation             | D1:Oxidation or Hydroxylation:77.13                                                                            | PEAKS PTM |
| K.NPQ(+.98)LQDLDDMLTC(+57.02)VEIK.E                              | N    | 38.70  | 2047.9629 | 17     | 2.9  | 1024.9917 | 2 | 46.45 | 41       | F41:2441 | OB5954 H1 Ro.raw | 0                   | 0        | 0                       | 420   | 436 | Carbamidomethylation                   | Q3:Deamidation (N Q):14.04; C13:Carbamidomethylation:1000.00                                                   | PEAKS DB  |
| K.DLAFFPGSGE(+53.92)QVEK.L                                       | N    | 37.31  | 1429.5812 | 13     | -6.3 | 715.7933  | 2 | 30.34 | 43       | F43:1518 | OB5956 H1 Ro.raw | 2.6492E5            | 1        | 1                       | 560   | 572 | Replacement of 2 protons by iron       | E9:Replacement of 2 protons by iron:37.54                                                                      | PEAKS PTM |
| K.GT(-18.01)GNLELVAVRK.E                                         | N    | 36.73  | 1237.7142 | 12     | 2.6  | 413.5797  | 3 | 27.00 | 42       | F42:1287 | OB5955 H1 Ro.raw | 4.7714E5            | 1        | 1                       | 458   | 469 | Dehydration                            | T2:Dehydration:100.00                                                                                          | PEAKS PTM |
| R.NT(-18.01)LEAAFNAAFNEIRR.V                                     | N    | 36.45  | 1875.9227 | 16     | 0.7  | 626.3153  | 3 | 34.16 | 43       | F43:1739 | OB5956 H1 Ro.raw | 6.9172E6            | 2        | 2                       | 316   | 331 | Dehydration                            | T2:Dehydration:100.00                                                                                          | PEAKS PTM |
| K.EGALM(+15.99)LPHFN(+.98)SK.A                                   | N    | 36.41  | 1359.6493 | 12     | 2.8  | 680.8338  | 2 | 31.22 | 41       | F41:1550 | OB5954 H1 Ro.raw | 0                   | 0        | 0                       | 437   | 448 | Oxidation (M); Deamidation (NQ)        | M5:Oxidation (M):1000.00;N10:Deamidation (N Q):1000.00                                                         | PEAKS DB  |
| R.DQSSY(-18.01)LQGFSTR.N                                         | N    | 36.32  | 1268.5785 | 11     | -0.6 | 635.2961  | 2 | 30.85 | 43       | F43:1579 | OB5956 H1 Ro.raw | 2.378E5             | 1        | 1                       | 305   | 315 |                                        | Y5:Dehydration:0.00                                                                                            | PEAKS PTM |
| R.C(+57.02)LQS(-18.01)C(+57.02)Q(+.98)QEPDDLKQK.A                | N    | 36.24  | 1858.8190 | 15     | -0.1 | 930.4167  | 2 | 28.47 | 31       | F31:1350 | OB5942 H6 Ro.raw | 0                   | 0        | 0                       | 42    | 56  | Carbamidomethylation; Dehydration      | C1:Carbamidomethylation:1000.00;S4:Dehydration:39.55; C5:Carbamidomethylation:1000.00;Q6:Deamidation (NQ):8.69 | PEAKS PTM |
| M.LPHFNSK.A                                                      | N    | 36.02  | 841.4446  | 7      | 1.3  | 421.7301  | 2 | 30.63 | 42       | F42:1510 | OB5955 H1 Ro.raw | 1.4673E6            | 2        | 2                       | 442   | 448 |                                        |                                                                                                                | PEAKS DB  |
| K.NPQLQDLDM(-48.00)MLTC(+57.02)VEIK.E                            | N    | 35.81  | 1998.9755 | 17     | 6.7  | 667.3369  | 3 | 34.52 | 43       | F43:1773 | OB5956 H1 Ro.raw | 8.4276E5            | 1        | 1                       | 420   | 436 | Carbamidomethylation                   | M9:Dethiomethyl:11.06;C13:Carbamidomethylation:1000.                                                           | PEAKS PTM |
| total 156 peptides                                               |      |        |           |        |      |           |   |       |          |          |                  |                     |          |                         |       |     |                                        |                                                                                                                |           |

| Peptide                                                       | Uniq | -10lgP | Mass      | Length | ppm  | m/z      | z | RT    | Fraction | Scan     | Source File      | Area Roasted in gel | #Feature | #Feature Roasted in gel | Start | End | PTM                        | AScore                                                                                                       | Found By  |
|---------------------------------------------------------------|------|--------|-----------|--------|------|----------|---|-------|----------|----------|------------------|---------------------|----------|-------------------------|-------|-----|----------------------------|--------------------------------------------------------------------------------------------------------------|-----------|
|                                                               |      |        |           |        |      |          |   |       |          |          |                  |                     |          |                         |       |     |                            | 00                                                                                                           |           |
| K.KNPQLQ(+.98)DLDMM(+15.99)LTC(+57.02)VEIKEGALMLPHFNSK.A      | N    | 33.72  | 3516.7124 | 30     | 3.3  | 880.1883 | 4 | 35.48 | 41       | F41:1798 | OB5954 H1 Ro.raw | 7.5658E5            | 1        | 1                       | 419   | 448 | Carbamidomethylation       | Q6:Deamidation (N Q):18.55; M11:Oxidation (M):14.02;C14:Carbamidomethylation:1000.00                         | PEAKS DB  |
| D.QSSYLQGFSSR.N                                               | N    | 33.26  | 1171.5621 | 10     | 2.1  | 586.7896 | 2 | 29.36 | 42       | F42:1431 | OB5955 H1 Ro.raw | 3.3134E4            | 1        | 1                       | 306   | 315 |                            |                                                                                                              | PEAKS DB  |
| R.IVQIEAKP(+15.99)NTLVLPK.H                                   | N    | 33.15  | 1678.0028 | 15     | -0.7 | 840.0081 | 2 | 30.35 | 41       | F41:1495 | OB5954 H1 Ro.raw | 0                   | 0        | 0                       | 214   | 228 |                            | P8:Oxidation or Hydroxylation:9.34                                                                           | PEAKS PTM |
| R.EREEDWRQPR.E                                                | N    | 32.92  | 1399.6592 | 10     | 5.7  | 700.8409 | 2 | 24.05 | 43       | F43:1141 | OB5956 H1 Ro.raw | 4.1173E4            | 1        | 1                       | 124   | 133 |                            |                                                                                                              | PEAKS DB  |
| R.D(-18.01)QSSYLQGFSSR.N                                      | N    | 31.95  | 1268.5785 | 11     | 1.6  | 635.2975 | 2 | 29.92 | 43       | F43:1489 | OB5956 H1 Ro.raw | 0                   | 0        | 0                       | 305   | 315 |                            | D1:Dehydration:0.00                                                                                          | PEAKS PTM |
| K.D(+53.92)LAPPGSGEQVEK.L                                     | N    | 31.27  | 1429.5812 | 13     | -4.3 | 715.7948 | 2 | 30.56 | 41       | F41:1500 | OB5954 H1 Ro.raw | 3.7719E5            | 1        | 1                       | 560   | 572 |                            | D1:Replacement of 2 protons by iron:0.00                                                                     | PEAKS PTM |
| K.KNPQLQDLDMM(+15.99)LTC(+57.02)VEIKEGALMLPHFNSK.A            | N    | 30.83  | 3515.7285 | 30     | 1.3  | 879.9406 | 4 | 35.25 | 42       | F42:1790 | OB5955 H1 Ro.raw | 0                   | 0        | 0                       | 419   | 448 | Carbamidomethylation       | M11:Oxidation (M):12.28;C14:Carbamidomethylation:1000.00                                                     | PEAKS DB  |
| R.DQSSY(+15.99)LQGFSSR.N                                      | N    | 30.72  | 1302.5840 | 11     | 1.6  | 652.3003 | 2 | 29.24 | 43       | F43:1470 | OB5956 H1 Ro.raw | 6.7205E4            | 1        | 1                       | 305   | 315 | Oxidation or Hydroxylation | Y5:Oxidation or Hydroxylation:26.36                                                                          | PEAKS PTM |
| N.TLEAAFAEFNEIRR.V                                            | N    | 30.42  | 1779.8904 | 15     | 3.5  | 890.9556 | 2 | 33.23 | 43       | F43:1696 | OB5956 H1 Ro.raw | 1.5374E5            | 1        | 1                       | 317   | 331 |                            |                                                                                                              | PEAKS DB  |
| R.IFLAGDKD(-18.01)NV.V                                        | N    | 30.00  | 1072.5553 | 10     | 0.7  | 537.2853 | 2 | 32.26 | 42       | F42:1603 | OB5955 H1 Ro.raw | 2.1452E6            | 1        | 1                       | 541   | 550 | Dehydration                | D8:Dehydration:45.01                                                                                         | PEAKS PTM |
| R.NTLEAAFAEFN(+15.99)EIRR.V                                   | N    | 29.99  | 1909.9282 | 16     | 0.9  | 955.9723 | 2 | 32.98 | 42       | F42:1662 | OB5955 H1 Ro.raw | 2.366E6             | 2        | 2                       | 316   | 331 |                            | N12:Oxidation or Hydroxylation:0.00                                                                          | PEAKS PTM |
| E.V(+57.02)SKEHVEELTK.H                                       | N    | 29.60  | 1354.7092 | 11     | -1.7 | 678.3607 | 2 | 24.05 | 42       | F42:1120 | OB5955 H1 Ro.raw | 0                   | 0        | 0                       | 365   | 375 |                            | V1:Carbamidomethylation (D HKE, X@N-term):0.00                                                               | PEAKS PTM |
| K.N(+.98)PQLQ(+.98)DLDMMLTC(+57.02)VEIKEGALM(+15.99)LPHFNSK.A | N    | 29.50  | 3389.6016 | 29     | 9.6  | 848.4158 | 4 | 37.65 | 43       | F43:2047 | OB5956 H1 Ro.raw | 6.1505E6            | 1        | 1                       | 420   | 448 | Carbamidomethylation       | N1:Deamidation (N Q):0.00;Q5:Deamidation (N Q):14.04;C13:Carbamidomethylation:1000.00;M22:Oxidation (M):0.00 | PEAKS DB  |
| H.RIVQIEAKPNTLVLPK.H                                          | N    | 29.34  | 1818.1090 | 16     | 0.6  | 607.0439 | 3 | 29.55 | 42       | F42:1454 | OB5955 H1 Ro.raw | 7.8202E4            | 1        | 1                       | 213   | 228 |                            |                                                                                                              | PEAKS DB  |
| total 156 peptides                                            |      |        |           |        |      |          |   |       |          |          |                  |                     |          |                         |       |     |                            |                                                                                                              |           |



| Peptide                                                               | Uniq | -10lgP | Mass      | Length | ppm | m/z      | z | RT    | Fraction | Scan     | Source File      | Area Roasted in gel | #Feature | #Feature Roasted in gel | Start | End | PTM                                 | AScore                                                                                                                              | Found By  |
|-----------------------------------------------------------------------|------|--------|-----------|--------|-----|----------|---|-------|----------|----------|------------------|---------------------|----------|-------------------------|-------|-----|-------------------------------------|-------------------------------------------------------------------------------------------------------------------------------------|-----------|
| R.NN(+.98)PFYFPSRR.F                                                  | N    | 29.19  | 1297.6204 | 10     | 9.3 | 649.8235 | 2 | 62.71 | 43       | F43:3425 | OB5956 H1 Ro.raw | 0                   | 0        | 0                       | 172   | 181 |                                     | N2:Deamidation (NQ):7.21                                                                                                            | PEAKS DB  |
| R.NTLEAAFNAEFN(+.98)EIR.R                                             | N    | 29.07  | 1738.8162 | 15     | 9.2 | 870.4233 | 2 | 44.36 | 42       | F42:2331 | OB5955 H1 Ro.raw | 5.4416E3            | 1        | 1                       | 316   | 330 |                                     | N12:Deamidation (NQ):0.00                                                                                                           | PEAKS DB  |
| R.EGE(+21.98)QEWGTPGSHVR.E                                            | N    | 28.92  | 1589.6835 | 14     | 1.4 | 795.8501 | 2 | 25.83 | 41       | F41:1231 | OB5954 H1 Ro.raw | 3.6144E3            | 1        | 1                       | 153   | 166 |                                     | E3:Sodium adduct:9.74                                                                                                               | PEAKS PTM |
| K.KNPQ(+.98)LQ(+.98)DLDM(+15.99)LTC(+57.02)VEIKEGALM(+15.99)LPHFNSK.A | N    | 28.74  | 3533.6914 | 30     | 9.7 | 884.4387 | 4 | 35.77 | 42       | F42:1822 | OB5955 H1 Ro.raw | 2.7541E5            | 1        | 1                       | 419   | 448 | Carbamidomethylation; Oxidation (M) | Q4:Deamidation (NQ):8.22;Q6:Deamidation (NQ):5.55;M11:Oxidation (M):0.00;C14:C carbamidomethylation:1000.00;M23:Oxidation (M):38.29 | PEAKS DB  |
| total 156 peptides                                                    |      |        |           |        |     |          |   |       |          |          |                  |                     |          |                         |       |     |                                     |                                                                                                                                     |           |

A1DZF0|A1DZF0\_ARAHY

back to list

| [Protein Coverage](#) | [Supporting Peptides](#) |

Protein Coverage:

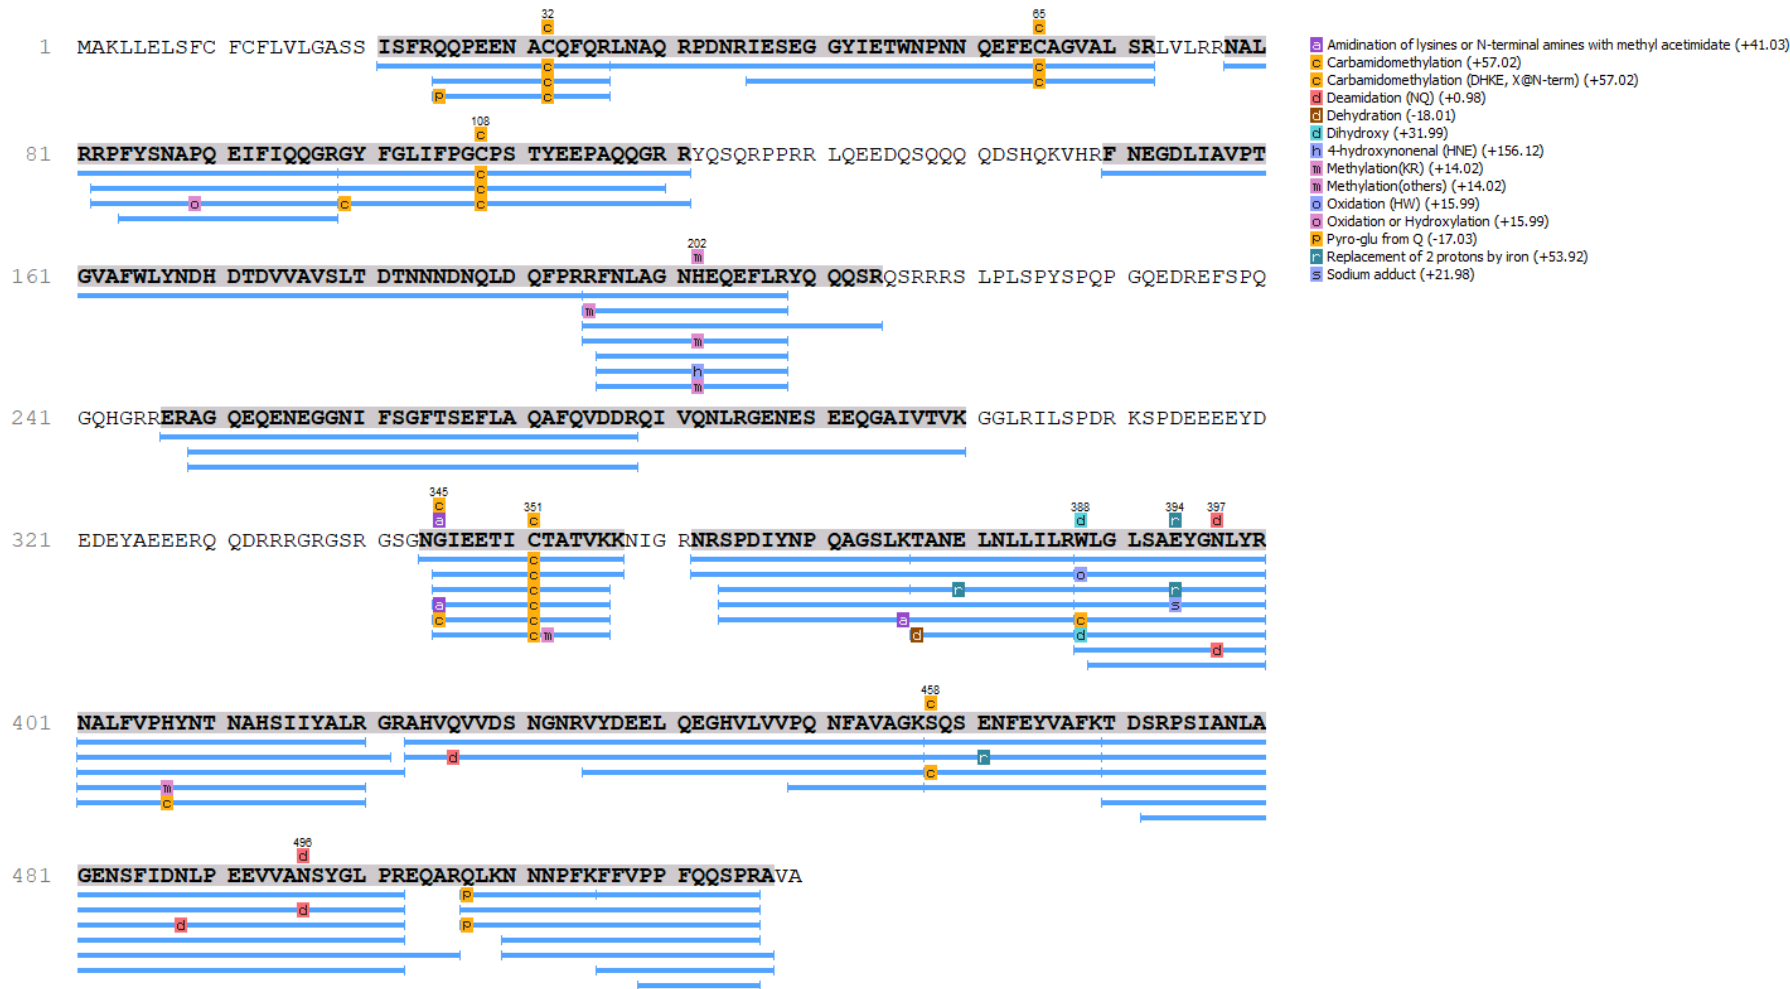

Supporting Peptides:

| Peptide                           | Uniq | -10lgP | Mass      | Length | ppm | m/z       | z | RT    | Fraction | Scan     | Source File       | Area Roasted in gel | #Feature | #Feature Roasted in gel | Start | End | PTM                  | AScore                            | Found By |
|-----------------------------------|------|--------|-----------|--------|-----|-----------|---|-------|----------|----------|-------------------|---------------------|----------|-------------------------|-------|-----|----------------------|-----------------------------------|----------|
| R.NALFVPHYNTNAHSIIYALR.G          | N    | 134.27 | 2313.2019 | 20     | 3.7 | 1157.6125 | 2 | 33.79 | 29       | F29:1486 | OB5922 H2 Ro.raw  | 5.1511E7            | 23       | 23                      | 401   | 420 |                      |                                   | PEAKS DB |
| R.GYFGLIFPGC(+57.02)PSTYEPAQQGR.R | N    | 127.83 | 2473.1372 | 22     | 3.0 | 1237.5796 | 2 | 36.11 | 38       | F38:1750 | OB5951 H3A Ro.raw | 2.5988E6            | 9        | 9                       | 99    | 120 | Carbamidomethylation | C10:Carbamidomethylation: 1000.00 | PEAKS DB |
| R.SPDIYNPQAGSLKTANELNLLILR.W      | N    | 125.09 | 2639.4282 | 24     | 2.1 | 880.8185  | 3 | 35.72 | 35       | F35:1738 | OB5946 H2 Ro.raw  | 6.3847E6            | 8        | 7                       | 364   | 387 |                      |                                   | PEAKS DB |
| R.WLGLSAEYGNLYR.N                 | N    | 121.81 | 1540.7673 | 13     | 2.8 | 771.3931  | 2 | 34.72 | 34       | F34:1730 | OB5945 H2 Ro.raw  | 5.9147E7            | 35       | 35                      | 388   | 400 |                      |                                   | PEAKS DB |
| R.NRSPDIYNPQAGSLKTANELNLLILR.W    | N    | 119.99 | 2909.5723 | 26     | 2.3 | 970.8669  | 3 | 34.91 | 29       | F29:1560 | OB5922 H2 Ro.raw  | 3.3615E6            | 6        | 6                       | 362   | 387 |                      |                                   | PEAKS DB |
| total 97 peptides                 |      |        |           |        |     |           |   |       |          |          |                   |                     |          |                         |       |     |                      |                                   |          |

| Peptide                                     | Uniq | -10lgP | Mass      | Length | ppm  | m/z       | z | RT    | Fraction | Scan     | Source File       | Area Roasted in gel | #Feature | #Feature Roasted in gel | Start | End | PTM                                   | AScore                                                     | Found By  |
|---------------------------------------------|------|--------|-----------|--------|------|-----------|---|-------|----------|----------|-------------------|---------------------|----------|-------------------------|-------|-----|---------------------------------------|------------------------------------------------------------|-----------|
| K.TDSRPSIANLAGENSFIDNLPeeVVANSYGLPR.E       | N    | 117.95 | 3544.7434 | 33     | 2.8  | 1182.5917 | 3 | 39.03 | 29       | F29:1808 | OB5922 H2 Ro.raw  | 6.0445E7            | 20       | 20                      | 470   | 502 |                                       |                                                            | PEAKS DB  |
| K.SQSENFYVAFK.T                             | N    | 116.27 | 1447.6619 | 12     | 3.0  | 724.8404  | 2 | 31.51 | 34       | F34:1498 | OB5945 H2 Ro.raw  | 1.8189E7            | 10       | 10                      | 458   | 469 |                                       |                                                            | PEAKS DB  |
| R.RPFYSNAPQEIFIQQGR.G                       | N    | 110.90 | 2050.0383 | 17     | 3.2  | 684.3556  | 3 | 31.52 | 38       | F38:1483 | OB5951 H3A Ro.raw | 9.1631E6            | 15       | 15                      | 82    | 98  |                                       |                                                            | PEAKS DB  |
| K.FFVPPFQQSPR.A                             | Y    | 102.82 | 1348.6927 | 11     | 2.2  | 675.3551  | 2 | 33.42 | 29       | F29:1469 | OB5922 H2 Ro.raw  | 3.3748E6            | 6        | 6                       | 516   | 526 |                                       |                                                            | PEAKS DB  |
| R.NALRRPFYSNAPQEIFIQQGR.G                   | N    | 97.93  | 2504.3037 | 21     | 1.0  | 835.7760  | 3 | 32.71 | 40       | F40:1535 | OB5953 H3A Ro.raw | 6.3111E6            | 14       | 13                      | 78    | 98  |                                       |                                                            | PEAKS DB  |
| R.NRSPDIYNPQAGSLK.T                         | N    | 96.54  | 1658.8376 | 15     | 0.1  | 830.4261  | 2 | 27.65 | 32       | F32:1291 | OB5943 H6 Ro.raw  | 8.0621E5            | 12       | 12                      | 362   | 376 |                                       |                                                            | PEAKS DB  |
| K.FFVPPFQQSPRA.V                            | Y    | 95.20  | 1419.7299 | 12     | 1.7  | 710.8734  | 2 | 33.01 | 34       | F34:1599 | OB5945 H2 Ro.raw  | 1.6137E6            | 4        | 4                       | 516   | 527 |                                       |                                                            | PEAKS DB  |
| N.GIEETIC(+57.02)TATVK.K                    | N    | 95.04  | 1320.6595 | 12     | -0.2 | 661.3369  | 2 | 29.91 | 29       | F29:1260 | OB5922 H2 Ro.raw  | 2.5094E5            | 6        | 6                       | 345   | 356 | Carbamidomethylation                  | C7:Carbamido methylation:1000.00                           | PEAKS DB  |
| R.SPDIYNPQAGSLK.T                           | N    | 92.16  | 1388.6936 | 13     | 1.7  | 695.3552  | 2 | 28.58 | 34       | F34:1323 | OB5945 H2 Ro.raw  | 1.33E6              | 6        | 6                       | 364   | 376 |                                       |                                                            | PEAKS DB  |
| R.FNLAGNHEQEFLR.Y                           | N    | 91.88  | 1573.7637 | 13     | 4.3  | 787.8925  | 2 | 30.57 | 38       | F38:1440 | OB5951 H3A Ro.raw | 1.243E5             | 7        | 7                       | 196   | 208 |                                       |                                                            | PEAKS DB  |
| K.NNNPFKFFVPPFQQSPR.A                       | Y    | 91.78  | 2063.0376 | 17     | 1.8  | 688.6877  | 3 | 35.64 | 29       | F29:1615 | OB5922 H2 Ro.raw  | 2.4453E5            | 5        | 5                       | 510   | 526 |                                       |                                                            | PEAKS DB  |
| R.VYDEELQEGHVLVVPQNFAVAGK.S                 | N    | 90.91  | 2540.2910 | 23     | 1.4  | 847.7721  | 3 | 33.42 | 29       | F29:1478 | OB5922 H2 Ro.raw  | 1.9062E6            | 10       | 10                      | 435   | 457 |                                       |                                                            | PEAKS DB  |
| K.TDSRPSIANLAGENSFIDNLPeeVVAN(+.98)SYGLPR.E | N    | 88.11  | 3545.7273 | 33     | 1.8  | 1182.9185 | 3 | 36.63 | 34       | F34:1807 | OB5945 H2 Ro.raw  | 3.983E3             | 1        | 1                       | 470   | 502 | Deamidation (NQ)                      | N27:Deamidation (NQ):103.10                                | PEAKS DB  |
| R.RFNLAGNHEQEFLR.Y                          | N    | 87.38  | 1729.8647 | 14     | 1.5  | 577.6297  | 3 | 31.36 | 40       | F40:1478 | OB5953 H3A Ro.raw | 1.8294E6            | 7        | 7                       | 195   | 208 |                                       |                                                            | PEAKS DB  |
| N.GIEETIC(+57.02)TATVKK.N                   | N    | 82.16  | 1448.7545 | 13     | 0.7  | 725.3850  | 2 | 27.45 | 31       | F31:1292 | OB5942 H6 Ro.raw  | 4.6237E5            | 5        | 5                       | 345   | 357 | Carbamidomethylation                  | C7:Carbamido methylation:1000.00                           | PEAKS DB  |
| R.NALFVPH(+14.02)YNTNAHSIIYALR.G            | N    | 79.80  | 2327.2175 | 20     | 0.7  | 776.7470  | 3 | 34.91 | 29       | F29:1561 | OB5922 H2 Ro.raw  | 1.3103E6            | 3        | 3                       | 401   | 420 | Methylation(others)                   | H7:Methylation(others):22.45                               | PEAKS PTM |
| R.AHVQVDSNGNRVYDEELQEGHVLVVPQNFAVAGK.S      | N    | 77.75  | 3816.9182 | 35     | 3.6  | 955.2402  | 4 | 32.32 | 35       | F35:1544 | OB5946 H2 Ro.raw  | 8.2893E6            | 8        | 8                       | 423   | 457 |                                       |                                                            | PEAKS DB  |
| R.GYGLIFPGC(+57.02)PSTYEPAQQGRR.Y           | N    | 76.83  | 2629.2383 | 23     | 2.4  | 877.4221  | 3 | 35.18 | 40       | F40:1676 | OB5953 H3A Ro.raw | 5.6622E6            | 9        | 9                       | 99    | 121 | Carbamidomethylation                  | C10:Carbamidomethylation:1000.00                           | PEAKS DB  |
| K.TANELNLLILR.W                             | N    | 76.42  | 1268.7452 | 11     | 0.6  | 635.3802  | 2 | 35.27 | 29       | F29:1655 | OB5922 H2 Ro.raw  | 2.1461E7            | 10       | 10                      | 377   | 387 |                                       |                                                            | PEAKS DB  |
| R.Q(-17.03)QPEENAC(+57.02)QFQR.L            | N    | 75.52  | 1516.6365 | 12     | 2.5  | 759.3274  | 2 | 28.03 | 32       | F32:1319 | OB5943 H6 Ro.raw  | 7.279E3             | 2        | 2                       | 25    | 36  | Pyro-glu from Q; Carbamidomethylation | Q1:Pyro-glu from Q:1000.00;C8:Carbamidomethylation:1000.00 | PEAKS PTM |
| V.PQNFAVAGK.S                               | N    | 75.51  | 930.4923  | 9      | 1.0  | 466.2539  | 2 | 32.32 | 35       | F35:1542 | OB5946 H2 Ro.raw  | 3.3444E6            | 3        | 3                       | 449   | 457 |                                       |                                                            | PEAKS DB  |
| R.IESEGgyIETWNPNNQEFEC(+57.02)AGVALSR.L     | N    | 74.31  | 3069.3774 | 27     | 1.4  | 1024.1345 | 3 | 34.50 | 31       | F31:1703 | OB5942 H6 Ro.raw  | 1.0361E4            | 1        | 1                       | 46    | 72  | Carbamidomethylation                  | C20:Carbamidomethylation:1000.00                           | PEAKS DB  |
| total 97 peptides                           |      |        |           |        |      |           |   |       |          |          |                   |                     |          |                         |       |     |                                       |                                                            |           |

| Peptide                                          | Uniq | -10lgP | Mass      | Length | ppm  | m/z       | z | RT    | Fraction | Scan     | Source File       | Area Roasted in gel | #Feature | #Feature Roasted in gel | Start | End | PTM                                                         | AScore                                                                           | Found By  |
|--------------------------------------------------|------|--------|-----------|--------|------|-----------|---|-------|----------|----------|-------------------|---------------------|----------|-------------------------|-------|-----|-------------------------------------------------------------|----------------------------------------------------------------------------------|-----------|
| R.QQPEENAC(+57.02)QFQR.L                         | N    | 73.76  | 1533.6630 | 12     | 1.7  | 767.8400  | 2 | 25.24 | 32       | F32:1157 | OB5943 H6 Ro.raw  | 3.7544E4            | 3        | 3                       | 25    | 36  | Carbamidomethylation                                        | C8:Carbamido methylation:1000.00                                                 | PEAKS DB  |
| R.QLKNNNPFKFFVPPFQQSPR.A                         | Y    | 70.66  | 2432.2751 | 20     | 0.9  | 609.0766  | 4 | 34.45 | 34       | F34:1679 | OB5945 H2 Ro.raw  | 6.0459E5            | 3        | 3                       | 507   | 526 |                                                             |                                                                                  | PEAKS DB  |
| R.AGQEQENEGGNIFSGFTSEFLAQAFQVDDR.Q               | Y    | 69.87  | 3290.4751 | 30     | 5.3  | 1646.2535 | 2 | 40.50 | 36       | F36:2017 | OB5948 H3B Ro.raw | 5.1868E4            | 1        | 1                       | 249   | 278 |                                                             |                                                                                  | PEAKS DB  |
| K.S(+57.02)QSENFEYVAFK.T                         | N    | 65.89  | 1504.6833 | 12     | 0.0  | 753.3489  | 2 | 31.77 | 35       | F35:1521 | OB5946 H2 Ro.raw  | 4.3047E5            | 3        | 3                       | 458   | 469 | Carbamidomethylation (DHKE, X@N-term)                       | S1:Carbamido methylation (D HKE, X@N-term):56.34                                 | PEAKS PTM |
| N.G(+57.02)IEETIC(+57.02)TATVK.K                 | N    | 64.33  | 1377.6809 | 12     | 2.0  | 689.8491  | 2 | 30.19 | 29       | F29:1285 | OB5922 H2 Ro.raw  | 5.5841E3            | 1        | 1                       | 345   | 356 | Carbamidomethylation (DHKE, X@N-term); Carbamidomethylation | G1:Carbamido methylation (D HKE, X@N-term):30.83;C7:Carbamidomethylation:1000.00 | PEAKS PTM |
| R.AHVQVVDN(+.98)GNRVYDEELQEGHVLVVPQNFAVAGK.S     | N    | 64.02  | 3817.9023 | 35     | 5.0  | 955.4877  | 4 | 33.04 | 29       | F29:1438 | OB5922 H2 Ro.raw  | 1.4175E6            | 2        | 2                       | 423   | 457 |                                                             | N9:Deamidation (NQ):9.40                                                         | PEAKS DB  |
| R.NALFVPH(+57.02)YNTNAHSIIYALR.G                 | N    | 63.66  | 2370.2231 | 20     | 0.1  | 791.0817  | 3 | 34.03 | 35       | F35:1631 | OB5946 H2 Ro.raw  | 8.9747E5            | 1        | 1                       | 401   | 420 | Carbamidomethylation (DHKE, X@N-term)                       | H7:Carbamido methylation (D HKE, X@N-term):20.35                                 | PEAKS PTM |
| R.RFNLAGNHEQEFLRYQQQSR.Q                         | N    | 62.22  | 2520.2371 | 20     | -2.3 | 631.0667  | 4 | 34.12 | 30       | F30:1496 | OB5926 H3B Ro.raw | 7.5688E4            | 2        | 2                       | 195   | 214 |                                                             |                                                                                  | PEAKS DB  |
| R.LNAQRPDNRIESEGGYIETWNPNNQEFEC(+57.02)AGVALSR.L | N    | 60.14  | 4133.9248 | 36     | 2.4  | 1034.4910 | 4 | 33.87 | 33       | F33:1670 | OB5944 H6 Ro.raw  | 1.5556E6            | 3        | 3                       | 37    | 72  | Carbamidomethylation                                        | C29:Carbamidomethylation:1000.00                                                 | PEAKS DB  |
| R.GYGFLIFPGC(+57.02)PS(+14.02)TYEPAQQGR.R        | N    | 59.71  | 2487.1528 | 22     | 2.2  | 1244.5864 | 2 | 36.43 | 32       | F32:1817 | OB5943 H6 Ro.raw  | 7.7963E4            | 3        | 3                       | 99    | 120 | Carbamidomethylation                                        | C10:Carbamidomethylation:1000.00;S12:Methylation(others):9.34                    | PEAKS PTM |
| R.W(+31.99)LGLSAEYGNLYR.N                        | N    | 59.45  | 1572.7572 | 13     | -1.6 | 787.3846  | 2 | 33.64 | 35       | F35:1624 | OB5946 H2 Ro.raw  | 8.5976E4            | 2        | 2                       | 388   | 400 | Dihydroxy                                                   | W1:Dihydroxy:62.93                                                               | PEAKS PTM |
| P.FYSNAPQEIFIQQGR.G                              | N    | 59.30  | 1796.8845 | 15     | -1.2 | 899.4484  | 2 | 32.27 | 31       | F31:1574 | OB5942 H6 Ro.raw  | 0                   | 0        | 0                       | 84    | 98  |                                                             |                                                                                  | PEAKS DB  |
| K.FFVPPFQQSP(+15.99)R.A                          | Y    | 58.77  | 1364.6876 | 11     | 0.9  | 683.3517  | 2 | 33.23 | 29       | F29:1459 | OB5922 H2 Ro.raw  | 1.167E6             | 2        | 2                       | 516   | 526 |                                                             | P10:Oxidation or Hydroxylation:12.28                                             | PEAKS PTM |
| R.FNEGDLIAVPTGVAFWLYNDHDTDVAVSLTDTNNNDNQDQFPR.R  | N    | 58.15  | 5049.3691 | 45     | 0.7  | 1684.1357 | 3 | 40.24 | 30       | F30:1843 | OB5926 H3B Ro.raw | 9.8654E5            | 1        | 1                       | 150   | 194 |                                                             |                                                                                  | PEAKS DB  |
| R.GYGFLIFPGC(+57.02)PST(+14.02)YEEPAQQGR.R       | N    | 58.14  | 2487.1528 | 22     | 2.8  | 1244.5872 | 2 | 36.17 | 31       | F31:1801 | OB5942 H6 Ro.raw  | 2.5405E4            | 2        | 2                       | 99    | 120 | Carbamidomethylation                                        | C10:Carbamidomethylation:1000.00;T13:Methylation(others):14.02                   | PEAKS PTM |
| R.W(+57.02)LGLSAEYGNLYR.N                        | N    | 57.46  | 1597.7888 | 13     | 0.6  | 799.9022  | 2 | 35.09 | 34       | F34:1725 | OB5945 H2 Ro.raw  | 1.848E4             | 1        | 1                       | 388   | 400 | Carbamidomethylation (DHKE, X@N-term)                       | W1:Carbamido methylation (D HKE, X@N-term):62.19                                 | PEAKS PTM |
| R.Q(-17.03)LKNNNPFK.F                            | N    | 56.41  | 1084.5665 | 9      | 1.6  | 543.2914  | 2 | 28.75 | 34       | F34:1346 | OB5945 H2 Ro.raw  | 1.0606E4            | 2        | 2                       | 507   | 515 | Pyro-glu from Q                                             | Q1:Pyro-glu from Q:1000.00                                                       | PEAKS PTM |
| K.SQSENF(+21.98)YVAFK.T                          | N    | 54.92  | 1469.6438 | 12     | -1.1 | 735.8284  | 2 | 31.92 | 29       | F29:1388 | OB5922 H2 Ro.raw  | 6.4574E4            | 2        | 2                       | 458   | 469 |                                                             | E7:Sodium adduct:14.84                                                           | PEAKS PTM |
| R.AHVQVVDNNG(+.98)RVYDEELQEGHVLVVPQNFAVAGK.S     | N    | 54.09  | 3817.9023 | 35     | 3.2  | 955.4859  | 4 | 32.51 | 34       | F34:1567 | OB5945 H2 Ro.raw  | 7.3088E4            | 3        | 3                       | 423   | 457 |                                                             | N11:Deamidation (NQ):8.22                                                        | PEAKS DB  |
| total 97 peptides                                |      |        |           |        |      |           |   |       |          |          |                   |                     |          |                         |       |     |                                                             |                                                                                  |           |

| Peptide                                           | Uniq | -10lgP | Mass      | Length | ppm  | m/z       | z | RT    | Fraction | Scan     | Source File       | Area Roasted in gel | #Feature | #Feature Roasted in gel | Start | End | PTM                                       | AScore                                                         | Found By  |
|---------------------------------------------------|------|--------|-----------|--------|------|-----------|---|-------|----------|----------|-------------------|---------------------|----------|-------------------------|-------|-----|-------------------------------------------|----------------------------------------------------------------|-----------|
| K.SQS(-18.01)ENFEYVAFK.T                          | N    | 53.31  | 1429.6514 | 12     | 1.9  | 715.8344  | 2 | 31.92 | 29       | F29:1380 | OB5922 H2 Ro.raw  | 3.0777E4            | 1        | 1                       | 458   | 469 |                                           | S3:Dehydration:14.04                                           | PEAKS PTM |
| R.IESEGGYIETWNPNNQ(+.98)EFEC(+57.02)AGVALSR.L     | N    | 52.73  | 3070.3613 | 27     | 6.0  | 1024.4672 | 3 | 34.92 | 32       | F32:1736 | OB5943 H6 Ro.raw  | 6.6817E3            | 1        | 1                       | 46    | 72  | Carbamidomethylation                      | Q16:Deamidation (NQ):0.00; C20:Carbamidomethylation:1000.00    | PEAKS DB  |
| K.NNNPFKFFVPPFQQSRA.V                             | Y    | 51.92  | 2134.0747 | 18     | 0.0  | 712.3655  | 3 | 35.15 | 35       | F35:1723 | OB5946 H2 Ro.raw  | 8.836E4             | 2        | 2                       | 510   | 527 |                                           |                                                                | PEAKS DB  |
| K.SQSE(+21.98)NFEYVAFK.T                          | N    | 51.89  | 1469.6438 | 12     | -0.6 | 735.8287  | 2 | 31.51 | 34       | F34:1513 | OB5945 H2 Ro.raw  | 2.7649E4            | 1        | 1                       | 458   | 469 |                                           | E4:Sodium adduct:0.00                                          | PEAKS PTM |
| R.VYDEELQEGHVLVVPQN(+.98)FAVAGK.S                 | N    | 51.23  | 2541.2751 | 23     | 9.5  | 1271.6569 | 2 | 32.92 | 31       | F31:1618 | OB5942 H6 Ro.raw  | 3.629E3             | 1        | 1                       | 435   | 457 |                                           | N17:Deamidation (NQ):14.02                                     | PEAKS DB  |
| R.S(+57.02)PDIYNPQAGSLK.T                         | N    | 50.29  | 1445.7150 | 13     | 5.7  | 723.8689  | 2 | 28.94 | 34       | F34:1350 | OB5945 H2 Ro.raw  | 6.4489E3            | 2        | 2                       | 364   | 376 |                                           | S1:Carbamido methylation (D HKE, X@N-term):14.04               | PEAKS PTM |
| K.TANE(+53.92)LNLLILR.W                           | N    | 48.78  | 1322.6646 | 11     | -1.4 | 662.3386  | 2 | 35.27 | 29       | F29:1590 | OB5922 H2 Ro.raw  | 2.333E5             | 1        | 1                       | 377   | 387 | Replacement of 2 protons by iron          | E4:Replacement of 2 protons by iron:154.98                     | PEAKS PTM |
| R.N(+57.02)ALFVPHYNTNAHSIIYALR.G                  | N    | 48.76  | 2370.2231 | 20     | -0.1 | 791.0816  | 3 | 34.53 | 29       | F29:1557 | OB5922 H2 Ro.raw  | 3.2966E6            | 1        | 1                       | 401   | 420 |                                           | N1:Carbamido methylation (D HKE, X@N-term):10.82               | PEAKS PTM |
| R.WGLSAE(+53.92)YGNLYR.N                          | N    | 48.21  | 1594.6866 | 13     | 0.4  | 532.5697  | 3 | 35.09 | 29       | F29:1579 | OB5922 H2 Ro.raw  | 6.0447E5            | 3        | 3                       | 388   | 400 | Replacement of 2 protons by iron          | E7:Replacement of 2 protons by iron:123.05                     | PEAKS PTM |
| K.TDSRPSIANLAGENSFIDN(+.98)LPEEVVANSYGLPR.E       | N    | 47.95  | 3545.7273 | 33     | 5.5  | 1182.9229 | 3 | 37.60 | 29       | F29:1724 | OB5922 H2 Ro.raw  | 0                   | 0        | 0                       | 470   | 502 | Deamidation (NQ)                          | N19:Deamidation (NQ):20.10                                     | PEAKS DB  |
| K.TDSRPSIANLAGENSFIDNLPEEVVANSYGLPREQAR.Q         | N    | 47.12  | 4028.9827 | 37     | 2.2  | 1008.2552 | 4 | 36.41 | 34       | F34:1777 | OB5945 H2 Ro.raw  | 1.9797E6            | 2        | 2                       | 470   | 506 |                                           |                                                                | PEAKS DB  |
| V.PPFQQSRA                                        | Y    | 46.41  | 955.4875  | 8      | -0.2 | 478.7510  | 2 | 35.15 | 35       | F35:1720 | OB5946 H2 Ro.raw  | 1.8433E5            | 2        | 2                       | 519   | 526 |                                           |                                                                | PEAKS DB  |
| K.SQSENFEYVAFKTDSRPSIANLAGENSFIDNLPEEVVANSYGLPR.E | N    | 45.95  | 4974.3945 | 45     | 3.1  | 1244.6097 | 4 | 37.99 | 35       | F35:1870 | OB5946 H2 Ro.raw  | 6.2475E6            | 4        | 4                       | 458   | 502 |                                           |                                                                | PEAKS DB  |
| R.SPD(+57.02)IYNPQAGSLK.T                         | N    | 45.16  | 1445.7150 | 13     | 2.2  | 723.8663  | 2 | 29.51 | 29       | F29:1244 | OB5922 H2 Ro.raw  | 0                   | 0        | 0                       | 364   | 376 |                                           | D3:Carbamido methylation (D HKE, X@N-term):0.00                | PEAKS PTM |
| R.NALFVPHYNTNAHSIIYALRG.R                         | N    | 44.84  | 2370.2231 | 21     | 1.2  | 791.0826  | 3 | 33.77 | 34       | F34:1624 | OB5945 H2 Ro.raw  | 4.2894E6            | 2        | 2                       | 401   | 421 |                                           |                                                                | PEAKS DB  |
| N.GIEETIC(+57.02)T(+14.02)ATVK.K                  | N    | 42.70  | 1334.6752 | 12     | 3.2  | 668.3470  | 2 | 29.62 | 34       | F34:1395 | OB5945 H2 Ro.raw  | 7.3781E3            | 1        | 1                       | 345   | 356 | Carbamidomethylation; Methylation(others) | C7:Carbamido methylation:1 000.00;T8:Methylation(others):28.36 | PEAKS PTM |
| K.TDSRPSIANLAGEN(+.98)SFIDNLPEEVVANSYGLPR.E       | N    | 42.55  | 3545.7273 | 33     | 9.2  | 1182.9272 | 3 | 48.53 | 34       | F34:2493 | OB5945 H2 Ro.raw  | 0                   | 0        | 0                       | 470   | 502 |                                           | N14:Deamidation (NQ):0.00                                      | PEAKS DB  |
| K.SQSE(+53.92)NFEYVAFK.T                          | N    | 42.20  | 1501.5812 | 12     | -2.3 | 751.7961  | 2 | 31.58 | 35       | F35:1507 | OB5946 H2 Ro.raw  | 9.4575E4            | 1        | 1                       | 458   | 469 | Replacement of 2 protons by iron          | E4:Replacement of 2 protons by iron:34.87                      | PEAKS PTM |
| D.SRPSIANLAGENSFIDNLPEEVVANSYGLPR.E               | N    | 42.12  | 3328.6687 | 31     | 3.9  | 1110.5679 | 3 | 37.36 | 34       | F34:1841 | OB5945 H2 Ro.raw  | 3.0619E5            | 2        | 2                       | 472   | 502 |                                           |                                                                | PEAKS DB  |
| R.FNLAGNH(+14.02)EQEFLR.Y                         | N    | 40.38  | 1587.7793 | 13     | 0.7  | 530.2674  | 3 | 30.81 | 39       | F39:1450 | OB5952 H3A Ro.raw | 1.3642E5            | 3        | 3                       | 196   | 208 | Methylation(others)                       | H7:Methylation(others):33.9 8                                  | PEAKS PTM |
| R.AHVQVDSNGNRVYDEELQ(+.98)EGHVLVVPQNFAVAGK.S      | N    | 40.20  | 3817.9023 | 35     | 7.9  | 955.4904  | 4 | 33.43 | 35       | F35:1615 | OB5946 H2 Ro.raw  | 0                   | 0        | 0                       | 423   | 457 |                                           | N19:Deamidation (NQ):4.91                                      | PEAKS DB  |
| total 97 peptides                                 |      |        |           |        |      |           |   |       |          |          |                   |                     |          |                         |       |     |                                           |                                                                |           |

| Peptide                                                | Uniq | -10lgP | Mass      | Length | ppm | m/z       | z | RT    | Fraction | Scan     | Source File       | Area Roasted in gel | #Feature | #Feature Roasted in gel | Start | End | PTM                                                                                       | AScore                                                                                                       | Found By  |
|--------------------------------------------------------|------|--------|-----------|--------|-----|-----------|---|-------|----------|----------|-------------------|---------------------|----------|-------------------------|-------|-----|-------------------------------------------------------------------------------------------|--------------------------------------------------------------------------------------------------------------|-----------|
| R.AGQEQENEGGNIFSGTSEFLAQAFQVDDRQIVQNLRGENSEEQGAIVTVK.G | Y    | 39.44  | 5712.7202 | 52     | 4.9 | 1429.1943 | 4 | 39.90 | 37       | F37:1989 | OB5949 H3B Ro.raw | 4.1738E6            | 1        | 1                       | 249   | 300 |                                                                                           |                                                                                                              | PEAKS DB  |
| R.AHVQVVDN(+.98)GN(+.98)RVYDEELQEGHVLVVPQNFVAVGK.S     | N    | 39.19  | 3818.8862 | 35     | 8.6 | 955.7371  | 4 | 34.33 | 32       | F32:1692 | OB5943 H6 Ro.raw  | 0                   | 0        | 0                       | 423   | 457 |                                                                                           | N9:Deamidation (NQ):0.00;N11:Deamidation (NQ):0.00                                                           | PEAKS DB  |
| K.SQSEN(+.98)FEYVAFKTSRPSIANLAGENSFIDNLPEEVVANSYGLPR.E | N    | 38.92  | 4975.3789 | 45     | 2.8 | 1244.8555 | 4 | 39.75 | 34       | F34:1987 | OB5945 H2 Ro.raw  | 0                   | 0        | 0                       | 458   | 502 |                                                                                           | N5:Deamidation (NQ):0.00                                                                                     | PEAKS DB  |
| R.RFNLAGNH(+14.02)EQEFLR.Y                             | N    | 38.64  | 1743.8805 | 14     | 0.5 | 582.3011  | 3 | 31.14 | 38       | F38:1453 | OB5951 H3A Ro.raw | 7.3646E5            | 3        | 3                       | 195   | 208 | Methylation(others)                                                                       | H8:Methylation(others):40.00                                                                                 | PEAKS PTM |
| R.AHVQ(+.98)VVDNNGNRVYDEELQEGHVLVVPQNFVAVGK.S          | N    | 38.57  | 3817.9023 | 35     | 0.9 | 955.4838  | 4 | 33.12 | 31       | F31:1624 | OB5942 H6 Ro.raw  | 4.5408E4            | 1        | 1                       | 423   | 457 | Deamidation (NQ)                                                                          | Q4:Deamidation (NQ):21.59                                                                                    | PEAKS DB  |
| W.LGLSAEYGNLYR.N                                       | N    | 38.37  | 1354.6881 | 12     | 3.5 | 678.3537  | 2 | 31.68 | 31       | F31:1539 | OB5942 H6 Ro.raw  | 0                   | 0        | 0                       | 389   | 400 |                                                                                           |                                                                                                              | PEAKS DB  |
| R.ERAGQEQENEGGNIFSGTSEFLAQAFQVDDR.Q                    | Y    | 38.12  | 3575.6189 | 32     | 1.7 | 1192.8823 | 3 | 39.35 | 36       | F36:1955 | OB5948 H3B Ro.raw | 5.3613E4            | 1        | 1                       | 247   | 278 |                                                                                           |                                                                                                              | PEAKS DB  |
| S.ISFRQQPEENAC(+57.02)QFQR.L                           | N    | 37.74  | 2036.9486 | 16     | 0.8 | 679.9907  | 3 | 28.84 | 36       | F36:1329 | OB5948 H3B Ro.raw | 3.1194E4            | 4        | 4                       | 21    | 36  | Carbamidomethylation                                                                      | C12:Carbamidomethylation:1000.00                                                                             | PEAKS DB  |
| K.FFVPPFQQSPR(+15.99)A.V                               | Y    | 37.64  | 1435.7247 | 12     | 2.2 | 718.8712  | 2 | 33.04 | 29       | F29:1458 | OB5922 H2 Ro.raw  | 6.9299E5            | 1        | 1                       | 516   | 527 |                                                                                           | R11:Oxidation or Hydroxylation:12.28                                                                         | PEAKS PTM |
| R.G(+57.02)YFGLIFPGC(+57.02)PSTYEPAQQGRR.Y             | N    | 37.54  | 2686.2598 | 23     | 1.6 | 896.4286  | 3 | 35.57 | 39       | F39:1718 | OB5952 H3A Ro.raw | 5.4933E4            | 1        | 1                       | 99    | 121 | Carbamidomethylation (DHKE, X@N-term); Carbamidomethylation                               | G1:Carbamidomethylation (DHKE, X@N-term):130.55;C10:Carbamidomethylation:1000.00                             | PEAKS PTM |
| R.Q(-17.03)LKNNNPFKFFVPPFQQSPR.A                       | Y    | 37.42  | 2415.2488 | 20     | 1.8 | 806.0917  | 3 | 36.41 | 34       | F34:1798 | OB5945 H2 Ro.raw  | 1.5157E5            | 1        | 1                       | 507   | 526 | Pyro-glu from Q                                                                           | Q1:Pyro-glu from Q:1000.00                                                                                   | PEAKS PTM |
| N.G(+41.03)IETIC(+57.02)TATVK.K                        | N    | 36.93  | 1361.6860 | 12     | 0.7 | 681.8508  | 2 | 29.66 | 34       | F34:1390 | OB5945 H2 Ro.raw  | 1.6824E4            | 1        | 1                       | 345   | 356 | Amidination of lysines or N-terminal amines with methyl acetimidate; Carbamidomethylation | G1:Amidination of lysines or N-terminal amines with methyl acetimidate:96.48;C7:Carbamidomethylation:1000.00 | PEAKS PTM |
| R.NALFVPHYNTNAHSIIYALRGR.A                             | N    | 36.04  | 2526.3245 | 22     | 0.6 | 843.1160  | 3 | 33.60 | 29       | F29:1492 | OB5922 H2 Ro.raw  | 7.6168E5            | 2        | 2                       | 401   | 422 |                                                                                           |                                                                                                              | PEAKS DB  |
| R.R(+14.02)FNLAGNHEQEFLR.Y                             | N    | 34.57  | 1743.8805 | 14     | 0.9 | 582.3013  | 3 | 31.38 | 39       | F39:1472 | OB5952 H3A Ro.raw | 2.9356E5            | 2        | 2                       | 195   | 208 | Methylation(KR)                                                                           | R1:Methylation (KR):67.58                                                                                    | PEAKS PTM |
| K.FFVPPFQQSP(+15.99)RA.V                               | Y    | 34.52  | 1435.7247 | 12     | 1.0 | 718.8704  | 2 | 32.88 | 35       | F35:1577 | OB5946 H2 Ro.raw  | 3.008E5             | 2        | 2                       | 516   | 527 |                                                                                           | P10:Oxidation or Hydroxylation:0.00                                                                          | PEAKS PTM |
| N.GIETIC(+57.02)T(+14.02)ATVKK.N                       | N    | 34.37  | 1462.7701 | 13     | 0.9 | 732.3930  | 2 | 27.73 | 31       | F31:1307 | OB5942 H6 Ro.raw  | 3.1361E3            | 1        | 1                       | 345   | 357 | Carbamidomethylation                                                                      | C7:Carbamidomethylation:1000.00;T8:Methylation(others):19.16                                                 | PEAKS PTM |
| R.WLGLSAEYGN(+.98)LYR.N                                | N    | 33.97  | 1541.7513 | 13     | 5.4 | 771.8871  | 2 | 54.24 | 29       | F29:2679 | OB5922 H2 Ro.raw  | 0                   | 0        | 0                       | 388   | 400 | Deamidation (NQ)                                                                          | N10:Deamidation (NQ):1000.00                                                                                 | PEAKS DB  |
| G.NGIETIC(+57.02)TATVKK.N                              | N    | 33.56  | 1562.7974 | 14     | 0.1 | 782.4060  | 2 | 29.85 | 34       | F34:1417 | OB5945 H2 Ro.raw  | 8.2899E3            | 2        | 2                       | 344   | 357 | Carbamidomethylation                                                                      | C8:Carbamidomethylation:1000.00                                                                              | PEAKS DB  |
| R.RPFYSNAP(+15.99)QEIFIQQGR.G                          | N    | 33.55  | 2066.0332 | 17     | 0.2 | 689.6852  | 3 | 31.94 | 40       | F40:1497 | OB5953 H3A Ro.raw | 4.3282E4            | 1        | 1                       | 82    | 98  | Oxidation or Hydroxylation                                                                | P8:Oxidation or Hydroxylation:32.28                                                                          | PEAKS PTM |
| total 97 peptides                                      |      |        |           |        |     |           |   |       |          |          |                   |                     |          |                         |       |     |                                                                                           |                                                                                                              |           |

| Peptide                                                | Uniq | -10lgP | Mass      | Length | ppm  | m/z       | z | RT    | Fraction | Scan     | Source File       | Area Roasted in gel | #Feature | #Feature Roasted in gel | Start | End | PTM                                                                 | AScore                                                                        | Found By  |
|--------------------------------------------------------|------|--------|-----------|--------|------|-----------|---|-------|----------|----------|-------------------|---------------------|----------|-------------------------|-------|-----|---------------------------------------------------------------------|-------------------------------------------------------------------------------|-----------|
| R.AHVQ(+.98)VVDSNGNRVYDEELQEGHVLVVPQ(+.98)NFAVAGK.S    | N    | 33.38  | 3818.8862 | 35     | 8.9  | 955.7373  | 4 | 33.12 | 31       | F31:1624 | OB5942 H6 Ro.raw  | 3.8034E4            | 1        | 1                       | 423   | 457 |                                                                     | Q4:Deamidation (NQ):8.81;Q28:Deamidation (NQ):12.28                           | PEAKS DB  |
| R.FNLAGNH(+156.12)EQEFLR.Y                             | N    | 33.01  | 1729.8788 | 13     | -7.6 | 577.6292  | 3 | 31.13 | 38       | F38:1444 | OB5951 H3A Ro.raw | 7.0376E5            | 2        | 2                       | 196   | 208 | 4-hydroxynonenal (HNE)                                              | H7:4-hydroxynonenal (HNE):1000.00                                             | PEAKS PTM |
| R.N(+.98)ALFVPHYNTNAHSIIYALR.G                         | N    | 32.68  | 2314.1858 | 20     | 7.3  | 772.4082  | 3 | 50.66 | 29       | F29:2450 | OB5922 H2 Ro.raw  | 1.0573E4            | 1        | 1                       | 401   | 420 |                                                                     | N1:Deamidation (NQ):0.00                                                      | PEAKS DB  |
| R.IESEGGYIETWN(+.98)PNNQEFEC(+57.02)AGVALSR.L          | N    | 32.58  | 3070.3613 | 27     | 6.9  | 1536.1985 | 2 | 34.73 | 32       | F32:1729 | OB5943 H6 Ro.raw  | 2.6575E4            | 1        | 1                       | 46    | 72  | Carbamidomethylation                                                | N12:Deamidation (NQ):0.00;C20:Carbamidomethylation:1000.00                    | PEAKS DB  |
| K.T(-18.01)ANELNLLILR.W                                | N    | 31.74  | 1250.7346 | 11     | 2.2  | 626.3760  | 2 | 35.27 | 29       | F29:1600 | OB5922 H2 Ro.raw  | 1.738E4             | 1        | 1                       | 377   | 387 | Dehydration                                                         | T1:Dehydration:1000.00                                                        | PEAKS PTM |
| R.SPDIYNPQAGSLK(+41.03)TANELNLLILR.W                   | N    | 31.55  | 2680.4548 | 24     | 0.2  | 894.4924  | 3 | 36.03 | 34       | F34:1771 | OB5945 H2 Ro.raw  | 3.6458E4            | 1        | 1                       | 364   | 387 | Amidination of lysines or N-terminal amines with methyl acetimidate | K13:Amidination of lysines or N-terminal amines with methyl acetimidate:54.40 | PEAKS PTM |
| R.WGLSAE(+21.98)YGNLYR.N                               | N    | 30.00  | 1562.7494 | 13     | -8.4 | 782.3754  | 2 | 35.27 | 29       | F29:1583 | OB5922 H2 Ro.raw  | 5.0047E4            | 2        | 2                       | 388   | 400 | Sodium adduct                                                       | E7:Sodium adduct:42.78                                                        | PEAKS PTM |
| R.LNAQRPDNRIESEGGYIETWNPNN(+.98)QEFEC(+57.02)AGVALSR.L | N    | 29.77  | 4134.9087 | 36     | 4.7  | 1379.3167 | 3 | 33.85 | 33       | F33:1671 | OB5944 H6 Ro.raw  | 8.0788E4            | 1        | 1                       | 37    | 72  | Carbamidomethylation                                                | N24:Deamidation (NQ):0.00;C29:Carbamidomethylation:1000.00                    | PEAKS DB  |
| K.TDSRPSIAN(+.98)LAGENSFIDNLPEEVVANSYGLPR.E            | N    | 29.47  | 3545.7273 | 33     | 8.7  | 1182.9266 | 3 | 48.17 | 29       | F29:2399 | OB5922 H2 Ro.raw  | 7.2607E4            | 1        | 1                       | 470   | 502 |                                                                     | N9:Deamidation (NQ):0.00                                                      | PEAKS DB  |
| N.GIEET(+14.02)IC(+57.02)TATVKK.N                      | N    | 29.08  | 1462.7701 | 13     | -1.4 | 732.3914  | 2 | 28.11 | 32       | F32:1329 | OB5943 H6 Ro.raw  | 2.1469E3            | 1        | 1                       | 345   | 357 | Carbamidomethylation                                                | T5:Methylation (others):9.08;C7:Carbamidomethylation:1000.00                  | PEAKS PTM |
| R.W(+15.99)LGLSAEYGNLYR.N                              | N    | 28.45  | 1556.7623 | 13     | -0.8 | 779.3878  | 2 | 34.26 | 31       | F31:1698 | OB5942 H6 Ro.raw  | 3.8864E3            | 1        | 1                       | 388   | 400 | Oxidation (HW)                                                      | W1:Oxidation (HW):1000.00                                                     | PEAKS PTM |
| total 97 peptides                                      |      |        |           |        |      |           |   |       |          |          |                   |                     |          |                         |       |     |                                                                     |                                                                               |           |

Q647H3|Q647H3\_ARAHY

[back to list](#)

| [Protein Coverage](#) | [Supporting Peptides](#) |

Protein Coverage:

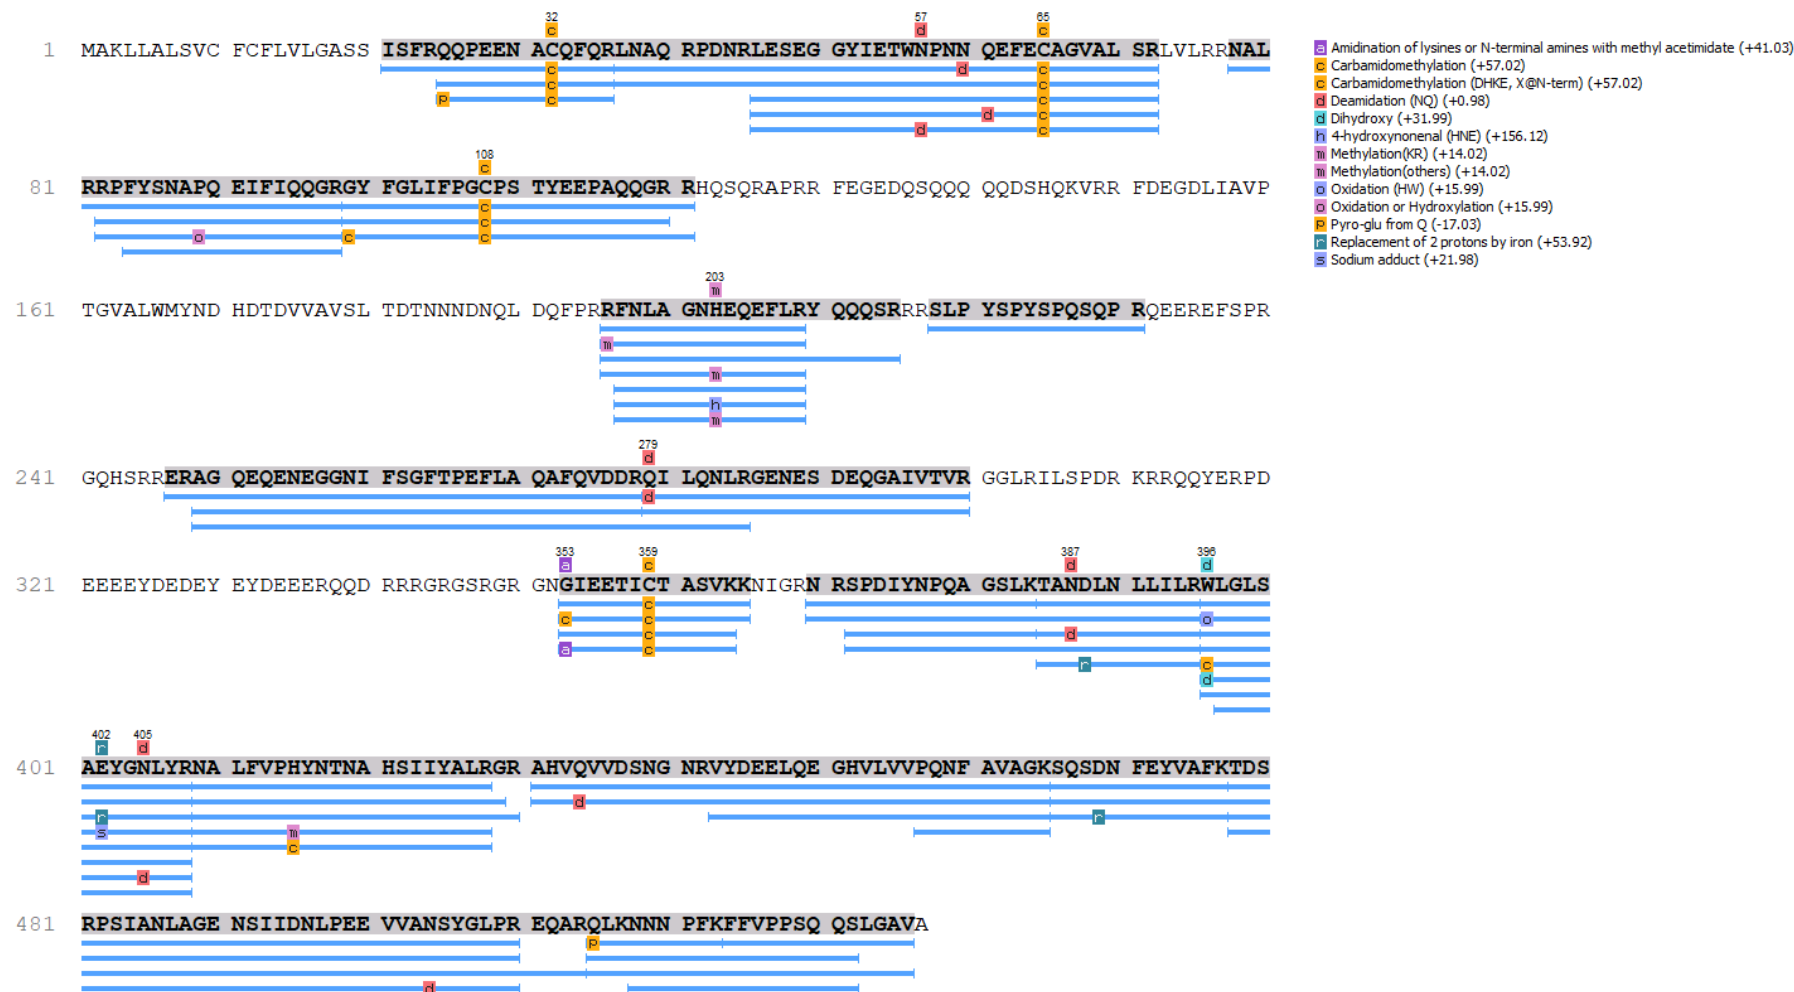

Supporting Peptides:

| Peptide                               | Uniq | -10lgP | Mass      | Length | ppm  | m/z       | z | RT    | Fraction | Scan     | Source File       | Area Roasted in gel | #Feature | #Feature Roasted in gel | Start | End | PTM                  | AScore                           | Found By |
|---------------------------------------|------|--------|-----------|--------|------|-----------|---|-------|----------|----------|-------------------|---------------------|----------|-------------------------|-------|-----|----------------------|----------------------------------|----------|
| R.SPDIYNPQAGSLKTANDLNLLILR.W          | N    | 136.50 | 2625.4126 | 24     | -0.1 | 876.1447  | 3 | 35.61 | 29       | F29:1607 | OB5922 H2 Ro.raw  | 1.276E6             | 3        | 3                       | 372   | 395 |                      |                                  | PEAKS DB |
| R.NALFVPHYNTNAHSIIYALR.G              | N    | 134.27 | 2313.2019 | 20     | 3.7  | 1157.6125 | 2 | 33.79 | 29       | F29:1486 | OB5922 H2 Ro.raw  | 5.1511E7            | 23       | 23                      | 409   | 428 |                      |                                  | PEAKS DB |
| R.GYGLIFPGC(+57.02)PSTYEPAQQGR.R      | N    | 127.83 | 2473.1372 | 22     | 3.0  | 1237.5796 | 2 | 36.11 | 38       | F38:1750 | OB5951 H3A Ro.raw | 2.5988E6            | 9        | 9                       | 99    | 120 | Carbamidomethylation | C10:Carbamidomethylation:1000.00 | PEAKS DB |
| K.TDSRPSIANLAGENSIIDNLPEEVVANSYGLPR.E | Y    | 125.30 | 3510.7590 | 33     | 5.7  | 1171.2670 | 3 | 37.70 | 29       | F29:1764 | OB5922 H2 Ro.raw  | 6.4659E7            | 19       | 19                      | 478   | 510 |                      |                                  | PEAKS DB |
| R.WLGLSAEYGNLYR.N                     | N    | 121.81 | 1540.7673 | 13     | 2.8  | 771.3931  | 2 | 34.72 | 34       | F34:1730 | OB5945 H2 Ro.raw  | 5.9147E7            | 35       | 35                      | 396   | 408 |                      |                                  | PEAKS DB |
| total 83 peptides                     |      |        |           |        |      |           |   |       |          |          |                   |                     |          |                         |       |     |                      |                                  |          |



| Peptide                                  | Uniq | -10lgP | Mass      | Length | ppm  | m/z       | z | RT    | Fraction | Scan     | Source File             | Area Roasted in gel | #Feature | #Feature Roasted in gel | Start | End | PTM                                   | AScore                                                     | Found By  |
|------------------------------------------|------|--------|-----------|--------|------|-----------|---|-------|----------|----------|-------------------------|---------------------|----------|-------------------------|-------|-----|---------------------------------------|------------------------------------------------------------|-----------|
| R.NRSPDIYNPQAGSLKTANDLNLILR.W            | N    | 120.82 | 2895.5566 | 26     | 1.6  | 966.1943  | 3 | 34.35 | 29       | F29:1530 | OB5922<br>H2<br>Ro.raw  | 2.2791E6            | 6        | 6                       | 370   | 395 |                                       |                                                            | PEAKS DB  |
| K.SQSDNFEYVAFK.T                         | N    | 114.21 | 1433.6462 | 12     | 2.6  | 717.8323  | 2 | 31.76 | 35       | F35:1518 | OB5946<br>H2<br>Ro.raw  | 5.4437E6            | 6        | 6                       | 466   | 477 |                                       |                                                            | PEAKS DB  |
| R.RPFYSNAPQEIFIQQGR.G                    | N    | 110.90 | 2050.0383 | 17     | 3.2  | 684.3556  | 3 | 31.52 | 38       | F38:1483 | OB5951<br>H3A<br>Ro.raw | 9.1631E6            | 15       | 15                      | 82    | 98  |                                       |                                                            | PEAKS DB  |
| R.NALRRPFYSNAPQEIFIQQGR.G                | N    | 97.93  | 2504.3037 | 21     | 1.0  | 835.7760  | 3 | 32.71 | 40       | F40:1535 | OB5953<br>H3A<br>Ro.raw | 6.3111E6            | 14       | 13                      | 78    | 98  |                                       |                                                            | PEAKS DB  |
| R.NRSPDIYNPQAGSLK.T                      | N    | 96.54  | 1658.8376 | 15     | 0.1  | 830.4261  | 2 | 27.65 | 32       | F32:1291 | OB5943<br>H6<br>Ro.raw  | 8.0621E5            | 12       | 12                      | 370   | 384 |                                       |                                                            | PEAKS DB  |
| R.SPDIYNPQAGSLK.T                        | N    | 92.16  | 1388.6936 | 13     | 1.7  | 695.3552  | 2 | 28.58 | 34       | F34:1323 | OB5945<br>H2<br>Ro.raw  | 1.33E6              | 6        | 6                       | 372   | 384 |                                       |                                                            | PEAKS DB  |
| R.FNLAGNHEQEFLR.Y                        | N    | 91.88  | 1573.7637 | 13     | 4.3  | 787.8925  | 2 | 30.57 | 38       | F38:1440 | OB5951<br>H3A<br>Ro.raw | 1.243E5             | 7        | 7                       | 197   | 209 |                                       |                                                            | PEAKS DB  |
| R.VYDEELQEGHVLVVPQNFAVAGK.S              | N    | 90.91  | 2540.2910 | 23     | 1.4  | 847.7721  | 3 | 33.42 | 29       | F29:1478 | OB5922<br>H2<br>Ro.raw  | 1.9062E6            | 10       | 10                      | 443   | 465 |                                       |                                                            | PEAKS DB  |
| N.GIEETIC(+57.02)TASVK.K                 | N    | 90.29  | 1306.6438 | 12     | 0.6  | 654.3296  | 2 | 28.94 | 34       | F34:1356 | OB5945<br>H2<br>Ro.raw  | 1.977E5             | 6        | 6                       | 353   | 364 | Carbamidomethylation                  | C7:Carbamidomethylation:1000.00                            | PEAKS DB  |
| R.RFNLGNHEQEFLR.Y                        | N    | 87.38  | 1729.8647 | 14     | 1.5  | 577.6297  | 3 | 31.36 | 40       | F40:1478 | OB5953<br>H3A<br>Ro.raw | 1.8294E6            | 7        | 7                       | 196   | 209 |                                       |                                                            | PEAKS DB  |
| R.NALFVPH(+14.02)YNTNAHSIIYALR.G         | N    | 79.80  | 2327.2175 | 20     | 0.7  | 776.7470  | 3 | 34.91 | 29       | F29:1561 | OB5922<br>H2<br>Ro.raw  | 1.3103E6            | 3        | 3                       | 409   | 428 | Methylation(others)                   | H7:Methylation(others):22.45                               | PEAKS PTM |
| R.AHVQVVDSDNGNRVYDEELQEGHVLVVPQNFAVAGK.S | N    | 77.75  | 3816.9182 | 35     | 3.6  | 955.2402  | 4 | 32.32 | 35       | F35:1544 | OB5946<br>H2<br>Ro.raw  | 8.2893E6            | 8        | 8                       | 431   | 465 |                                       |                                                            | PEAKS DB  |
| R.GYGLIFPGC(+57.02)PSTYEPAQQGRR.H        | N    | 76.83  | 2629.2383 | 23     | 2.4  | 877.4221  | 3 | 35.18 | 40       | F40:1676 | OB5953<br>H3A<br>Ro.raw | 5.6622E6            | 9        | 9                       | 99    | 121 | Carbamidomethylation                  | C10:Carbamidomethylation:1000.00                           | PEAKS DB  |
| R.AGQEQENEGGNIFSGFTPEFLAQAFQVDDR.Q       | N    | 76.51  | 3300.4958 | 30     | 5.3  | 1651.2639 | 2 | 39.94 | 40       | F40:1970 | OB5953<br>H3A<br>Ro.raw | 0                   | 0        | 0                       | 249   | 278 |                                       |                                                            | PEAKS DB  |
| N.GIEETIC(+57.02)TASVKK.N                | N    | 76.18  | 1434.7388 | 13     | 0.7  | 718.3771  | 2 | 26.91 | 33       | F33:1250 | OB5944<br>H6<br>Ro.raw  | 3.5109E5            | 8        | 8                       | 353   | 365 | Carbamidomethylation                  | C7:Carbamidomethylation:1000.00                            | PEAKS DB  |
| R.Q(-17.03)QPEENAC(+57.02)QFQR.L         | N    | 75.52  | 1516.6365 | 12     | 2.5  | 759.3274  | 2 | 28.03 | 32       | F32:1319 | OB5943<br>H6<br>Ro.raw  | 7.279E3             | 2        | 2                       | 25    | 36  | Pyro-glu from Q; Carbamidomethylation | Q1:Pyro-glu from Q:1000.00;C8:Carbamidomethylation:1000.00 | PEAKS PTM |
| V.PQNFAVAGK.S                            | N    | 75.51  | 930.4923  | 9      | 1.0  | 466.2539  | 2 | 32.32 | 35       | F35:1542 | OB5946<br>H2<br>Ro.raw  | 3.3444E6            | 3        | 3                       | 457   | 465 |                                       |                                                            | PEAKS DB  |
| R.LESEGGYIETWNPNNQEFEC(+57.02)AGVALSR.L  | N    | 74.31  | 3069.3774 | 27     | 1.4  | 1024.1345 | 3 | 34.50 | 31       | F31:1703 | OB5942<br>H6<br>Ro.raw  | 1.0361E4            | 1        | 1                       | 46    | 72  | Carbamidomethylation                  | C20:Carbamidomethylation:1000.00                           | PEAKS DB  |
| K.TANDLNLILR.W                           | N    | 73.94  | 1254.7296 | 11     | 1.8  | 628.3732  | 2 | 34.79 | 35       | F35:1750 | OB5946<br>H2<br>Ro.raw  | 1.0437E7            | 10       | 10                      | 385   | 395 |                                       |                                                            | PEAKS DB  |
| R.QQPEENAC(+57.02)QFQR.L                 | N    | 73.76  | 1533.6630 | 12     | 1.7  | 767.8400  | 2 | 25.24 | 32       | F32:1157 | OB5943<br>H6<br>Ro.raw  | 3.7544E4            | 3        | 3                       | 25    | 36  | Carbamidomethylation                  | C8:Carbamidomethylation:1000.00                            | PEAKS DB  |
| R.QILQNLNGENESDEQGAIVTVR.G               | N    | 71.90  | 2468.2620 | 22     | -1.5 | 823.7600  | 3 | 30.32 | 38       | F38:1424 | OB5951<br>H3A<br>Ro.raw | 3.9221E4            | 1        | 1                       | 279   | 300 |                                       |                                                            | PEAKS DB  |
| R.S(+57.02)PDIYNPQAGSLKTANDLNLILR.W      | N    | 64.15  | 2682.4341 | 24     | 1.5  | 895.1533  | 3 | 35.28 | 34       | F34:1735 | OB5945<br>H2<br>Ro.raw  | 9.5441E4            | 1        | 1                       | 372   | 395 |                                       | S1:Carbamidomethylation (DHKE, X@N-term):14.04             | PEAKS PTM |
| total 83 peptides                        |      |        |           |        |      |           |   |       |          |          |                         |                     |          |                         |       |     |                                       |                                                            |           |

| Peptide                                        | Uniq | -10lgP | Mass      | Length | ppm  | m/z       | z | RT    | Fraction | Scan     | Source File             | Area Roasted in gel | #Feature | #Feature Roasted in gel | Start | End | PTM                                                                                       | AScore                                                                                                     | Found By  |
|------------------------------------------------|------|--------|-----------|--------|------|-----------|---|-------|----------|----------|-------------------------|---------------------|----------|-------------------------|-------|-----|-------------------------------------------------------------------------------------------|------------------------------------------------------------------------------------------------------------|-----------|
| R.AHVQVVDN(+.98)GNRVYDEELQEGHVLVVPQNFAVAGK.S   | N    | 64.02  | 3817.9023 | 35     | 5.0  | 955.4877  | 4 | 33.04 | 29       | F29:1438 | OB5922<br>H2<br>Ro.raw  | 1.4175E6            | 2        | 2                       | 431   | 465 |                                                                                           | N9:Deamidation (NQ):9.40                                                                                   | PEAKS DB  |
| R.NALFVPH(+57.02)YNTNAHSIIYALR.G               | N    | 63.66  | 2370.2231 | 20     | 0.1  | 791.0817  | 3 | 34.03 | 35       | F35:1631 | OB5946<br>H2<br>Ro.raw  | 8.9747E5            | 1        | 1                       | 409   | 428 | Carbamidomethylation (DHKE, X@N-term)                                                     | H7:Carbamidomethylation (DHKE, X@N-term):20.35                                                             | PEAKS PTM |
| R.RFNLAGNHEQEFLRYQQQS.R                        | N    | 62.22  | 2520.2371 | 20     | -2.3 | 631.0667  | 4 | 34.12 | 30       | F30:1496 | OB5926<br>H3B<br>Ro.raw | 7.5688E4            | 2        | 2                       | 196   | 215 |                                                                                           |                                                                                                            | PEAKS DB  |
| R.LNAQRPDNRLESGGYIETWNPNNQEFC(+57.02)AGVALSR.L | N    | 60.14  | 4133.9248 | 36     | 2.4  | 1034.4910 | 4 | 33.87 | 33       | F33:1670 | OB5944<br>H6<br>Ro.raw  | 1.5556E6            | 3        | 3                       | 37    | 72  | Carbamidomethylation                                                                      | C29:Carbamidomethylation:1000.00                                                                           | PEAKS DB  |
| R.GYGLIFPGC(+57.02)PS(+14.02)YEEPAQQGR.R       | N    | 59.71  | 2487.1528 | 22     | 2.2  | 1244.5864 | 2 | 36.43 | 32       | F32:1817 | OB5943<br>H6<br>Ro.raw  | 7.7963E4            | 3        | 3                       | 99    | 120 | Carbamidomethylation                                                                      | C10:Carbamidomethylation:1000.00;S12:Methylation(others):9.34                                              | PEAKS PTM |
| R.W(+31.99)LGLSAEYGNLYR.N                      | N    | 59.45  | 1572.7572 | 13     | -1.6 | 787.3846  | 2 | 33.64 | 35       | F35:1624 | OB5946<br>H2<br>Ro.raw  | 8.5976E4            | 2        | 2                       | 396   | 408 | Dihydroxy                                                                                 | W1:Dihydroxy:62.93                                                                                         | PEAKS PTM |
| P.FYSNAPQEIFIQQGR.G                            | N    | 59.30  | 1796.8845 | 15     | -1.2 | 899.4484  | 2 | 32.27 | 31       | F31:1574 | OB5942<br>H6<br>Ro.raw  | 0                   | 0        | 0                       | 84    | 98  |                                                                                           |                                                                                                            | PEAKS DB  |
| R.GYGLIFPGC(+57.02)PST(+14.02)YEEPAQQGR.R      | N    | 58.14  | 2487.1528 | 22     | 2.8  | 1244.5872 | 2 | 36.17 | 31       | F31:1801 | OB5942<br>H6<br>Ro.raw  | 2.5405E4            | 2        | 2                       | 99    | 120 | Carbamidomethylation                                                                      | C10:Carbamidomethylation:1000.00;T13:Methylation(others):14.02                                             | PEAKS PTM |
| R.W(+57.02)LGLSAEYGNLYR.N                      | N    | 57.46  | 1597.7888 | 13     | 0.6  | 799.9022  | 2 | 35.09 | 34       | F34:1725 | OB5945<br>H2<br>Ro.raw  | 1.848E4             | 1        | 1                       | 396   | 408 | Carbamidomethylation (DHKE, X@N-term)                                                     | W1:Carbamidomethylation (DHKE, X@N-term):62.19                                                             | PEAKS PTM |
| R.Q(-17.03)LKNNNPFK.F                          | N    | 56.41  | 1084.5665 | 9      | 1.6  | 543.2914  | 2 | 28.75 | 34       | F34:1346 | OB5945<br>H2<br>Ro.raw  | 1.0606E4            | 2        | 2                       | 515   | 523 | Pyro-glu from Q                                                                           | Q1:Pyro-glu from Q:1000.00                                                                                 | PEAKS PTM |
| R.ERAGQEENEGGNIFSGFTPEFLAQAFQVDDR.Q            | N    | 54.92  | 3585.6396 | 32     | -0.3 | 1196.2201 | 3 | 38.71 | 40       | F40:1900 | OB5953<br>H3A<br>Ro.raw | 0                   | 0        | 0                       | 247   | 278 |                                                                                           |                                                                                                            | PEAKS DB  |
| R.AHVQVVDNNGN(+.98)RVYDEELQEGHVLVVPQNFAVAGK.S  | N    | 54.09  | 3817.9023 | 35     | 3.2  | 955.4859  | 4 | 32.51 | 34       | F34:1567 | OB5945<br>H2<br>Ro.raw  | 7.3088E4            | 3        | 3                       | 431   | 465 |                                                                                           | N11:Deamidation (NQ):8.22                                                                                  | PEAKS DB  |
| R.LESEGGYIETWNPNNQ(+.98)EFEC(+57.02)AGVALSR.L  | N    | 52.73  | 3070.3613 | 27     | 6.0  | 1024.4672 | 3 | 34.92 | 32       | F32:1736 | OB5943<br>H6<br>Ro.raw  | 6.6817E3            | 1        | 1                       | 46    | 72  | Deamidation (NQ); Carbamidomethylation                                                    | Q16:Deamidation (NQ):1000.00;C20:Carbamidomethylation:1000.00                                              | PEAKS DB  |
| R.ERAGQEEN(+.98)EGGNIFSGFTPEFLAQAFQVDDR.Q      | N    | 51.36  | 3586.6235 | 32     | 1.3  | 1196.5500 | 3 | 38.82 | 40       | F40:1900 | OB5953<br>H3A<br>Ro.raw | 1.0134E5            | 1        | 1                       | 247   | 278 |                                                                                           | N9:Deamidation (NQ):0.00                                                                                   | PEAKS DB  |
| R.VYDEELQEGHVLVVPQN(+.98)FAVAGK.S              | N    | 51.23  | 2541.2751 | 23     | 9.5  | 1271.6569 | 2 | 32.92 | 31       | F31:1618 | OB5942<br>H6<br>Ro.raw  | 3.629E3             | 1        | 1                       | 443   | 465 |                                                                                           | N17:Deamidation (NQ):14.02                                                                                 | PEAKS DB  |
| K.TAN(+.98)DLNLLILR.W                          | N    | 50.73  | 1255.7136 | 11     | 2.6  | 628.8657  | 2 | 35.22 | 31       | F31:1745 | OB5942<br>H6<br>Ro.raw  | 0                   | 0        | 0                       | 385   | 395 | Deamidation (NQ)                                                                          | N3:Deamidation (NQ):68.31                                                                                  | PEAKS DB  |
| R.S(+57.02)PDIYNPQAGSLK.T                      | N    | 50.29  | 1445.7150 | 13     | 5.7  | 723.8689  | 2 | 28.94 | 34       | F34:1350 | OB5945<br>H2<br>Ro.raw  | 6.4489E3            | 2        | 2                       | 372   | 384 |                                                                                           | S1:Carbamidomethylation (DHKE, X@N-term):14.04                                                             | PEAKS PTM |
| R.N(+57.02)ALFVPHYNTNAHSIIYALR.G               | N    | 48.76  | 2370.2231 | 20     | -0.1 | 791.0816  | 3 | 34.53 | 29       | F29:1557 | OB5922<br>H2<br>Ro.raw  | 3.2966E6            | 1        | 1                       | 409   | 428 |                                                                                           | N1:Carbamidomethylation (DHKE, X@N-term):10.82                                                             | PEAKS PTM |
| R.WLGLSAE(+53.92)YGNLYR.N                      | N    | 48.21  | 1594.6866 | 13     | 0.4  | 532.5697  | 3 | 35.09 | 29       | F29:1579 | OB5922<br>H2<br>Ro.raw  | 6.0447E5            | 3        | 3                       | 396   | 408 | Replacement of 2 protons by iron                                                          | E7:Replacement of 2 protons by iron:123.05                                                                 | PEAKS PTM |
| N.G(+41.03)IETIC(+57.02)TASVK.K                | N    | 48.20  | 1347.6704 | 12     | 0.3  | 674.8427  | 2 | 29.12 | 34       | F34:1370 | OB5945<br>H2<br>Ro.raw  | 1.5496E4            | 1        | 1                       | 353   | 364 | Amidination of lysines or N-terminal amines with methyl acetimidate; Carbamidomethylation | G1:Amidination of lysines or N-terminal amines with methyl acetimidate:96.48;C7:Carbamidomethylation:10.00 | PEAKS PTM |
| R.AGQEEN(+.98)EGGNIFSGFTPEFLAQAFQVDDR.Q        | N    | 47.49  | 3301.4800 | 30     | 5.2  | 1651.7559 | 2 | 39.74 | 38       | F38:1968 | OB5951<br>H3A<br>Ro.raw | 2.9773E5            | 2        | 2                       | 249   | 278 |                                                                                           | N7:Deamidation (NQ):0.00                                                                                   | PEAKS DB  |
| total 83 peptides                              |      |        |           |        |      |           |   |       |          |          |                         |                     |          |                         |       |     |                                                                                           |                                                                                                            |           |

| Peptide                                            | Uniq | -10lgP | Mass      | Length | ppm  | m/z       | z | RT    | Fraction | Scan     | Source File             | Area Roasted in gel | #Feature | #Feature Roasted in gel | Start | End | PTM                                                         | AScore                                                                           | Found By     |
|----------------------------------------------------|------|--------|-----------|--------|------|-----------|---|-------|----------|----------|-------------------------|---------------------|----------|-------------------------|-------|-----|-------------------------------------------------------------|----------------------------------------------------------------------------------|--------------|
| R.SPD(+57.02)IYNPQAGSLK.T                          | N    | 45.16  | 1445.7150 | 13     | 2.2  | 723.8663  | 2 | 29.51 | 29       | F29:1244 | OB5922<br>H2<br>Ro.raw  | 0                   | 0        | 0                       | 372   | 384 |                                                             | D3:Carbamidomethylation (DHKE, X@N-term):0.00                                    | PEAKS<br>PTM |
| R.NALFVPHYNTNAHSIIYALRG.R                          | N    | 44.84  | 2370.2231 | 21     | 1.2  | 791.0826  | 3 | 33.77 | 34       | F34:1624 | OB5945<br>H2<br>Ro.raw  | 4.2894E6            | 2        | 2                       | 409   | 429 |                                                             |                                                                                  | PEAKS<br>DB  |
| R.QLKNNNPFKFFVPPSQSLGAV.A                          | Y    | 43.05  | 2459.2961 | 22     | 3.6  | 820.7756  | 3 | 33.50 | 29       | F29:1470 | OB5922<br>H2<br>Ro.raw  | 5.0433E5            | 1        | 1                       | 515   | 536 |                                                             |                                                                                  | PEAKS<br>DB  |
| K.SQSDNFEYVAFKTDSRPSIANLAGENSIIDNLPeeVVANSYGLPR.E  | Y    | 42.72  | 4926.3945 | 45     | -0.7 | 1232.6051 | 4 | 37.16 | 34       | F34:1856 | OB5945<br>H2<br>Ro.raw  | 4.0502E6            | 2        | 2                       | 466   | 510 |                                                             |                                                                                  | PEAKS<br>DB  |
| R.QLKNNNPFKFFVPPSQQS.L                             | N    | 42.33  | 2119.0850 | 18     | 1.9  | 707.3703  | 3 | 33.27 | 35       | F35:1604 | OB5946<br>H2<br>Ro.raw  | 6.7737E4            | 1        | 1                       | 515   | 532 |                                                             |                                                                                  | PEAKS<br>DB  |
| R.Q(+.98)ILQNLRGENSEDEQGAIVTVR.G                   | N    | 41.79  | 2469.2458 | 22     | -2.8 | 824.0869  | 3 | 30.49 | 40       | F40:1426 | OB5953<br>H3A<br>Ro.raw | 0                   | 0        | 0                       | 279   | 300 | Deamidation (NQ)                                            | Q1:Deamidation (NQ):28.70                                                        | PEAKS<br>DB  |
| K.NNNPFKFFVPPSQQS.L                                | N    | 41.33  | 1749.8474 | 15     | 1.0  | 875.9319  | 2 | 34.91 | 29       | F29:1573 | OB5922<br>H2<br>Ro.raw  | 4.7342E4            | 1        | 1                       | 518   | 532 |                                                             |                                                                                  | PEAKS<br>DB  |
| N.G(+57.02)IEETIC(+57.02)TASVKK.N                  | N    | 41.05  | 1491.7603 | 13     | 8.7  | 746.8939  | 2 | 26.96 | 31       | F31:1261 | OB5942<br>H6<br>Ro.raw  | 3.2429E4            | 4        | 4                       | 353   | 365 | Carbamidomethylation (DHKE, X@N-term); Carbamidomethylation | G1:Carbamidomethylation (DHKE, X@N-term):32.28; C7:Carbamidomethylation:1000.00  | PEAKS<br>PTM |
| R.FNLAGNH(+14.02)EQEFLR.Y                          | N    | 40.38  | 1587.7793 | 13     | 0.7  | 530.2674  | 3 | 30.81 | 39       | F39:1450 | OB5952<br>H3A<br>Ro.raw | 1.3642E5            | 3        | 3                       | 197   | 209 | Methylation(others)                                         | H7:Methylation(others):33.98                                                     | PEAKS<br>PTM |
| K.SQSD(+53.92)NFEYVAFK.T                           | N    | 40.31  | 1487.5656 | 12     | -2.8 | 744.7880  | 2 | 32.03 | 29       | F29:1395 | OB5922<br>H2<br>Ro.raw  | 0                   | 0        | 0                       | 466   | 477 | Replacement of 2 protons by iron                            | D4:Replacement of 2 protons by iron:20.50                                        | PEAKS<br>PTM |
| R.AHVQVVDNNGNRVYDEELQ(+.98)EGHVLVVPQNFAVAGK.S      | N    | 40.20  | 3817.9023 | 35     | 7.9  | 955.4904  | 4 | 33.43 | 35       | F35:1615 | OB5946<br>H2<br>Ro.raw  | 0                   | 0        | 0                       | 431   | 465 |                                                             | Q19:Deamidation (NQ):4.91                                                        | PEAKS<br>DB  |
| R.AHVQVVDN(+.98)GN(+.98)RVYDEELQEGHVLVVPQNFAVAGK.S | N    | 39.19  | 3818.8862 | 35     | 8.6  | 955.7371  | 4 | 34.33 | 32       | F32:1692 | OB5943<br>H6<br>Ro.raw  | 0                   | 0        | 0                       | 431   | 465 |                                                             | N9:Deamidation (NQ):0.00;N11:Deamidation (NQ):0.00                               | PEAKS<br>DB  |
| K.TAND(+53.92)LNLILR.W                             | N    | 38.76  | 1308.6488 | 11     | 0.2  | 655.3318  | 2 | 35.09 | 29       | F29:1584 | OB5922<br>H2<br>Ro.raw  | 8.7715E4            | 1        | 1                       | 385   | 395 | Replacement of 2 protons by iron                            | D4:Replacement of 2 protons by iron:55.73                                        | PEAKS<br>PTM |
| R.RFNLAGNH(+14.02)EQEFLR.Y                         | N    | 38.64  | 1743.8805 | 14     | 0.5  | 582.3011  | 3 | 31.14 | 38       | F38:1453 | OB5951<br>H3A<br>Ro.raw | 7.3646E5            | 3        | 3                       | 196   | 209 | Methylation(others)                                         | H8:Methylation(others):40.00                                                     | PEAKS<br>PTM |
| R.AHVQ(+.98)VVDNNGNRVYDEELQEGHVLVVPQNFAVAGK.S      | N    | 38.57  | 3817.9023 | 35     | 0.9  | 955.4838  | 4 | 33.12 | 31       | F31:1624 | OB5942<br>H6<br>Ro.raw  | 4.5408E4            | 1        | 1                       | 431   | 465 | Deamidation (NQ)                                            | Q4:Deamidation (NQ):21.59                                                        | PEAKS<br>DB  |
| W.LGLSAEYGNLYR.N                                   | N    | 38.37  | 1354.6881 | 12     | 3.5  | 678.3537  | 2 | 31.68 | 31       | F31:1539 | OB5942<br>H6<br>Ro.raw  | 0                   | 0        | 0                       | 397   | 408 |                                                             |                                                                                  | PEAKS<br>DB  |
| S.ISFRQPQEENAC(+57.02)QFQR.L                       | N    | 37.74  | 2036.9486 | 16     | 0.8  | 679.9907  | 3 | 28.84 | 36       | F36:1329 | OB5948<br>H3B<br>Ro.raw | 3.1194E4            | 4        | 4                       | 21    | 36  | Carbamidomethylation                                        | C12:Carbamidomethylation:1000.00                                                 | PEAKS<br>DB  |
| R.G(+57.02)YFLIFPGC(+57.02)PSTYEEPAQQGRR.H         | N    | 37.54  | 2686.2598 | 23     | 1.6  | 896.4286  | 3 | 35.57 | 39       | F39:1718 | OB5952<br>H3A<br>Ro.raw | 5.4933E4            | 1        | 1                       | 99    | 121 | Carbamidomethylation (DHKE, X@N-term); Carbamidomethylation | G1:Carbamidomethylation (DHKE, X@N-term):130.55;C10:Carbamidomethylation:1000.00 | PEAKS<br>PTM |
| K.TDSRPSIANLAGEN(+.98)SIIDNLPeeVVANSYGLPR.E        | Y    | 36.75  | 3511.7429 | 33     | 8.6  | 1171.5983 | 3 | 48.17 | 29       | F29:2321 | OB5922<br>H2<br>Ro.raw  | 6.9222E4            | 3        | 3                       | 478   | 510 |                                                             | N14:Deamidation (NQ):10.19                                                       | PEAKS<br>DB  |
| K.FFVPPSQSLGAV.A                                   | Y    | 36.25  | 1375.7135 | 13     | 9.3  | 688.8704  | 2 | 30.71 | 31       | F31:1587 | OB5942<br>H6<br>Ro.raw  | 8.8364E4            | 1        | 1                       | 524   | 536 |                                                             |                                                                                  | PEAKS<br>DB  |
| R.SLPSPYSP(+31.99)QSQPR.Q                          | N    | 36.19  | 1637.7686 | 14     | 3.2  | 819.8942  | 2 | 27.07 | 38       | F38:1250 | OB5951<br>H3A<br>Ro.raw | 6.6096E3            | 1        | 1                       | 218   | 231 |                                                             | P9:Dihydroxy:9.42                                                                | PEAKS<br>PTM |
| total 83 peptides                                  |      |        |           |        |      |           |   |       |          |          |                         |                     |          |                         |       |     |                                                             |                                                                                  |              |

| Peptide                                                | Uniq | -10lgP | Mass      | Length | ppm  | m/z       | z | RT    | Fraction | Scan     | Source File       | Area Roasted in gel | #Feature | #Feature Roasted in gel | Start | End | PTM                                    | AScore                                                        | Found By  |
|--------------------------------------------------------|------|--------|-----------|--------|------|-----------|---|-------|----------|----------|-------------------|---------------------|----------|-------------------------|-------|-----|----------------------------------------|---------------------------------------------------------------|-----------|
| R.NALFVPHYNTNAHSIIYALRGR.A                             | N    | 36.04  | 2526.3245 | 22     | 0.6  | 843.1160  | 3 | 33.60 | 29       | F29:1492 | OB5922 H2 Ro.raw  | 7.6168E5            | 2        | 2                       | 409   | 430 |                                        |                                                               | PEAKS DB  |
| K.TDSRPSIANLAGENSIIDNLPEEVVAN(+.98)SYGLPR.E            | Y    | 35.07  | 3511.7429 | 33     | 5.1  | 1171.5942 | 3 | 46.13 | 34       | F34:2348 | OB5945 H2 Ro.raw  | 4.9547E4            | 2        | 2                       | 478   | 510 | Deamidation (NQ)                       | N27:Deamidation (NQ):43.76                                    | PEAKS DB  |
| R.R(+14.02)FNLAGNHEQEFLR.Y                             | N    | 34.57  | 1743.8805 | 14     | 0.9  | 582.3013  | 3 | 31.38 | 39       | F39:1472 | OB5952 H3A Ro.raw | 2.9356E5            | 2        | 2                       | 196   | 209 | Methylation(KR)                        | R1:Methylation(KR):67.58                                      | PEAKS PTM |
| R.AGQEQENEGGNIFSGFTPEFLAQAFQVDDRQILQNL.R.G             | N    | 34.03  | 4166.0093 | 37     | 1.9  | 1389.6797 | 3 | 40.12 | 38       | F38:1986 | OB5951 H3A Ro.raw | 6.2075E4            | 1        | 1                       | 249   | 285 |                                        |                                                               | PEAKS DB  |
| R.WLGLSAEYGN(+.98)LYR.N                                | N    | 33.97  | 1541.7513 | 13     | 5.4  | 771.8871  | 2 | 54.24 | 29       | F29:2679 | OB5922 H2 Ro.raw  | 0                   | 0        | 0                       | 396   | 408 | Deamidation (NQ)                       | N10:Deamidation (NQ):1000.00                                  | PEAKS DB  |
| R.RPFYSNAP(+15.99)QEIFIQQGR.G                          | N    | 33.55  | 2066.0332 | 17     | 0.2  | 689.6852  | 3 | 31.94 | 40       | F40:1497 | OB5953 H3A Ro.raw | 4.3282E4            | 1        | 1                       | 82    | 98  | Oxidation or Hydroxylation             | P8:Oxidation or Hydroxylation:32.28                           | PEAKS PTM |
| R.AHVQ(+.98)VVDSSNGNRVYDEELQEGHVLVVPQ(+.98)NFAVAGK.S   | N    | 33.38  | 3818.8862 | 35     | 8.9  | 955.7373  | 4 | 33.12 | 31       | F31:1624 | OB5942 H6 Ro.raw  | 3.8034E4            | 1        | 1                       | 431   | 465 |                                        | Q4:Deamidation (NQ):8.81;Q28:Deamidation (NQ):12.28           | PEAKS DB  |
| R.FNLAGNH(+156.12)EQEFLR.Y                             | N    | 33.01  | 1729.8788 | 13     | -7.6 | 577.6292  | 3 | 31.13 | 38       | F38:1444 | OB5951 H3A Ro.raw | 7.0376E5            | 2        | 2                       | 197   | 209 | 4-hydroxynonenal (HNE)                 | H7:4-hydroxynonenal (HNE):1000.00                             | PEAKS PTM |
| R.N(+.98)ALFVPHYNTNAHSIIYALR.G                         | N    | 32.68  | 2314.1858 | 20     | 7.3  | 772.4082  | 3 | 50.66 | 29       | F29:2450 | OB5922 H2 Ro.raw  | 1.0573E4            | 1        | 1                       | 409   | 428 |                                        | N1:Deamidation (NQ):0.00                                      | PEAKS DB  |
| R.LESEGGYIETWN(+.98)PNNQEFEC(+57.02)AGVALSR.L          | N    | 32.58  | 3070.3613 | 27     | 6.9  | 1536.1985 | 2 | 34.73 | 32       | F32:1729 | OB5943 H6 Ro.raw  | 2.6575E4            | 1        | 1                       | 46    | 72  | Deamidation (NQ); Carbamidomethylation | N12:Deamidation (NQ):1000.00;C20:Carbamidomethylation:1000.00 | PEAKS DB  |
| K.TDSRPSIANLAGENSIIDNLPEEVVANSYGLPREQAR.Q              | Y    | 30.77  | 3994.9983 | 37     | 2.4  | 999.7593  | 4 | 35.84 | 34       | F34:1758 | OB5945 H2 Ro.raw  | 5.332E5             | 1        | 1                       | 478   | 514 |                                        |                                                               | PEAKS DB  |
| R.WLGLSAE(+21.98)YGNLYR.N                              | N    | 30.00  | 1562.7494 | 13     | -8.4 | 782.3754  | 2 | 35.27 | 29       | F29:1583 | OB5922 H2 Ro.raw  | 5.0047E4            | 2        | 2                       | 396   | 408 | Sodium adduct                          | E7:Sodium adduct:42.78                                        | PEAKS PTM |
| R.LNAQRPDNRLESEGGYIETWNPNN(+.98)QEFEC(+57.02)AGVALSR.L | N    | 29.77  | 4134.9087 | 36     | 4.7  | 1379.3167 | 3 | 33.85 | 33       | F33:1671 | OB5944 H6 Ro.raw  | 8.0788E4            | 1        | 1                       | 37    | 72  | Deamidation (NQ); Carbamidomethylation | N24:Deamidation (NQ):1000.00;C29:Carbamidomethylation:1000.00 | PEAKS DB  |
| R.W(+15.99)LGLSAEYGNLYR.N                              | N    | 28.45  | 1556.7623 | 13     | -0.8 | 779.3878  | 2 | 34.26 | 31       | F31:1698 | OB5942 H6 Ro.raw  | 3.8864E3            | 1        | 1                       | 396   | 408 | Oxidation (HW)                         | W1:Oxidation (HW):1000.00                                     | PEAKS PTM |
| total 83 peptides                                      |      |        |           |        |      |           |   |       |          |          |                   |                     |          |                         |       |     |                                        |                                                               |           |

Q9FZ11|Q9FZ11\_ARAHY

back to list

| [Protein Coverage](#) | [Supporting Peptides](#) |

Protein Coverage:

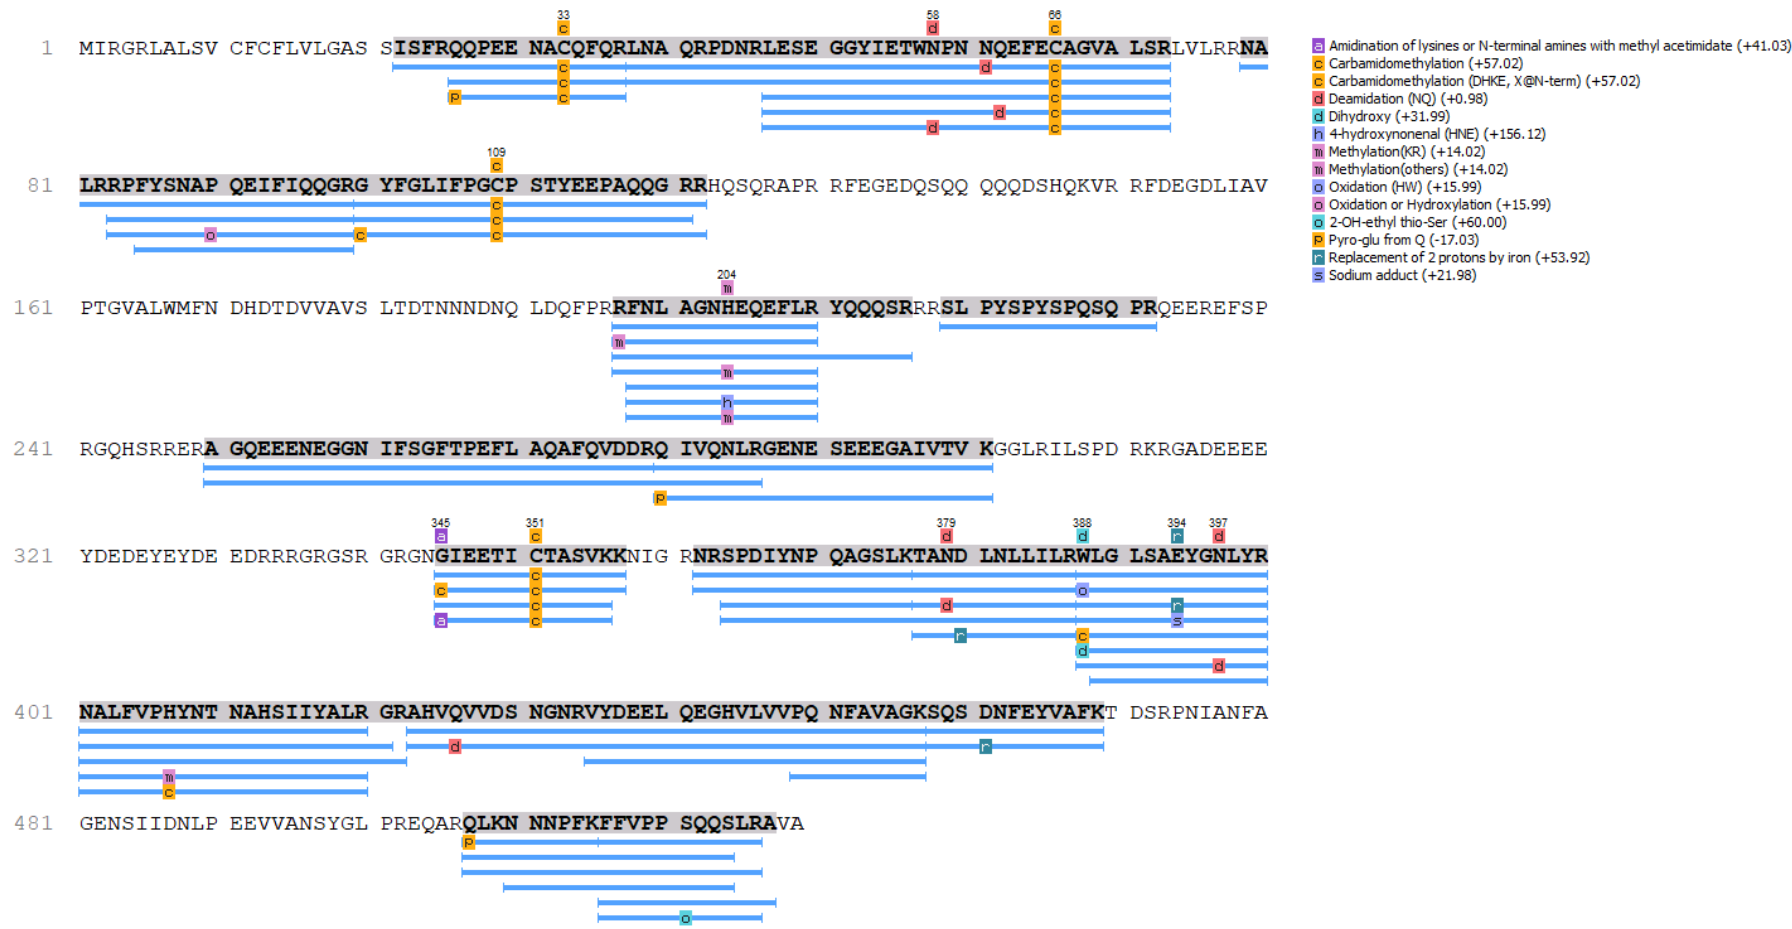

Supporting Peptides:

| Peptide                           | Uniq | -10lgP | Mass      | Length | ppm  | m/z       | z | RT    | Fraction | Scan     | Source File       | Area Roasted in gel | #Feature | #Feature Roasted in gel | Start | End | PTM                  | AScore                           | Found By |
|-----------------------------------|------|--------|-----------|--------|------|-----------|---|-------|----------|----------|-------------------|---------------------|----------|-------------------------|-------|-----|----------------------|----------------------------------|----------|
| R.SPDIYNPQAGSLKTANDLNLILR.W       | N    | 136.50 | 2625.4126 | 24     | -0.1 | 876.1447  | 3 | 35.61 | 29       | F29:1607 | OB5922 H2 Ro.raw  | 1.276E6             | 3        | 3                       | 364   | 387 |                      |                                  | PEAKS DB |
| R.NALFVPHYNTNAHSIIYALR.G          | N    | 134.27 | 2313.2019 | 20     | 3.7  | 1157.6125 | 2 | 33.79 | 29       | F29:1486 | OB5922 H2 Ro.raw  | 5.1511E7            | 23       | 23                      | 401   | 420 |                      |                                  | PEAKS DB |
| R.GYFGLIFPGC(+57.02)PSTYEPAQQGR.R | N    | 127.83 | 2473.1372 | 22     | 3.0  | 1237.5796 | 2 | 36.11 | 38       | F38:1750 | OB5951 H3A Ro.raw | 2.5988E6            | 9        | 9                       | 100   | 121 | Carbamidomethylation | C10:Carbamidomethylation:1000.00 | PEAKS DB |
| R.WGLSLAEYGNLYR.N                 | N    | 121.81 | 1540.7673 | 13     | 2.8  | 771.3931  | 2 | 34.72 | 34       | F34:1730 | OB5945 H2 Ro.raw  | 5.9147E7            | 35       | 35                      | 388   | 400 |                      |                                  | PEAKS DB |
| R.NRSPDIYNPQAGSLKTANDLNLILR.W     | N    | 120.82 | 2895.5566 | 26     | 1.6  | 966.1943  | 3 | 34.35 | 29       | F29:1530 | OB5922 H2 Ro.raw  | 2.2791E6            | 6        | 6                       | 362   | 387 |                      |                                  | PEAKS DB |
| K.SQSDNFEYVAFK.T                  | N    | 114.21 | 1433.6462 | 12     | 2.6  | 717.8323  | 2 | 31.76 | 35       | F35:1518 | OB5946 H2 Ro.raw  | 5.4437E6            | 6        | 6                       | 458   | 469 |                      |                                  | PEAKS DB |
| total 79 peptides                 |      |        |           |        |      |           |   |       |          |          |                   |                     |          |                         |       |     |                      |                                  |          |

| Peptide                                 | Uniq | -10lgP | Mass      | Length | ppm  | m/z       | z | RT    | Fraction | Scan     | Source File             | Area Roasted in gel | #Feature | #Feature Roasted in gel | Start | End | PTM                                      | AScore                                                                | Found By     |
|-----------------------------------------|------|--------|-----------|--------|------|-----------|---|-------|----------|----------|-------------------------|---------------------|----------|-------------------------|-------|-----|------------------------------------------|-----------------------------------------------------------------------|--------------|
| R.RPFYSNAPQEIFIQQGR.G                   | N    | 110.90 | 2050.0383 | 17     | 3.2  | 684.3556  | 3 | 31.52 | 38       | F38:1483 | OB5951<br>H3A<br>Ro.raw | 9.1631E6            | 15       | 15                      | 83    | 99  |                                          |                                                                       | PEAKS<br>DB  |
| K.FFVPPSQSLRA.V                         | Y    | 98.38  | 1375.7247 | 12     | 2.6  | 688.8715  | 2 | 30.85 | 35       | F35:1464 | OB5946<br>H2<br>Ro.raw  | 1.6951E6            | 6        | 6                       | 516   | 527 |                                          |                                                                       | PEAKS<br>DB  |
| R.NALRRPFYSNAPQEIFIQQGR.G               | N    | 97.93  | 2504.3037 | 21     | 1.0  | 835.7760  | 3 | 32.71 | 40       | F40:1535 | OB5953<br>H3A<br>Ro.raw | 6.3111E6            | 14       | 13                      | 79    | 99  |                                          |                                                                       | PEAKS<br>DB  |
| R.NRSPDIYNPQAGSLK.T                     | N    | 96.54  | 1658.8376 | 15     | 0.1  | 830.4261  | 2 | 27.65 | 32       | F32:1291 | OB5943<br>H6<br>Ro.raw  | 8.0621E5            | 12       | 12                      | 362   | 376 |                                          |                                                                       | PEAKS<br>DB  |
| R.SPDIYNPQAGSLK.T                       | N    | 92.16  | 1388.6936 | 13     | 1.7  | 695.3552  | 2 | 28.58 | 34       | F34:1323 | OB5945<br>H2<br>Ro.raw  | 1.33E6              | 6        | 6                       | 364   | 376 |                                          |                                                                       | PEAKS<br>DB  |
| R.FNLAGNHEQEFLR.Y                       | N    | 91.88  | 1573.7637 | 13     | 4.3  | 787.8925  | 2 | 30.57 | 38       | F38:1440 | OB5951<br>H3A<br>Ro.raw | 1.243E5             | 7        | 7                       | 198   | 210 |                                          |                                                                       | PEAKS<br>DB  |
| R.VYDEELQEGHVLVVPQNFAVAGK.S             | N    | 90.91  | 2540.2910 | 23     | 1.4  | 847.7721  | 3 | 33.42 | 29       | F29:1478 | OB5922<br>H2<br>Ro.raw  | 1.9062E6            | 10       | 10                      | 435   | 457 |                                          |                                                                       | PEAKS<br>DB  |
| N.GIEETIC(+57.02)TASVK.K                | N    | 90.29  | 1306.6438 | 12     | 0.6  | 654.3296  | 2 | 28.94 | 34       | F34:1356 | OB5945<br>H2<br>Ro.raw  | 1.977E5             | 6        | 6                       | 345   | 356 | Carbamidomethylation                     | C7:Carbamidomet<br>hylation:1000.00                                   | PEAKS<br>DB  |
| R.RFNLAGNHEQEFLR.Y                      | N    | 87.38  | 1729.8647 | 14     | 1.5  | 577.6297  | 3 | 31.36 | 40       | F40:1478 | OB5953<br>H3A<br>Ro.raw | 1.8294E6            | 7        | 7                       | 197   | 210 |                                          |                                                                       | PEAKS<br>DB  |
| K.FFVPPSQSLR.A                          | Y    | 86.75  | 1304.6876 | 11     | 0.7  | 653.3516  | 2 | 30.28 | 35       | F35:1421 | OB5946<br>H2<br>Ro.raw  | 6.0578E5            | 6        | 6                       | 516   | 526 |                                          |                                                                       | PEAKS<br>DB  |
| R.QIVQNLRGENSEEEGAIVTK.G                | Y    | 85.48  | 2441.2397 | 22     | -0.8 | 814.7532  | 3 | 30.43 | 39       | F39:1429 | OB5952<br>H3A<br>Ro.raw | 3.5103E4            | 2        | 2                       | 280   | 301 |                                          |                                                                       | PEAKS<br>DB  |
| R.NALFVPH(+14.02)YNTNAHSIIYALR.G        | N    | 79.80  | 2327.2175 | 20     | 0.7  | 776.7470  | 3 | 34.91 | 29       | F29:1561 | OB5922<br>H2<br>Ro.raw  | 1.3103E6            | 3        | 3                       | 401   | 420 | Methylation(others)                      | H7:Methylation(ot<br>hers):22.45                                      | PEAKS<br>PTM |
| R.QLKNNNPFFVPPSQSLR.A                   | Y    | 78.28  | 2388.2703 | 20     | 2.2  | 797.0991  | 3 | 33.23 | 29       | F29:1468 | OB5922<br>H2<br>Ro.raw  | 1.3469E5            | 1        | 1                       | 507   | 526 |                                          |                                                                       | PEAKS<br>DB  |
| R.AHVQVDSNGNRVYDEELQEGHVLVVPQNFAVAGK.S  | N    | 77.75  | 3816.9182 | 35     | 3.6  | 955.2402  | 4 | 32.32 | 35       | F35:1544 | OB5946<br>H2<br>Ro.raw  | 8.2893E6            | 8        | 8                       | 423   | 457 |                                          |                                                                       | PEAKS<br>DB  |
| R.GYGLIFPGC(+57.02)PSTYEPAQQGRR.H       | N    | 76.83  | 2629.2383 | 23     | 2.4  | 877.4221  | 3 | 35.18 | 40       | F40:1676 | OB5953<br>H3A<br>Ro.raw | 5.6622E6            | 9        | 9                       | 100   | 122 | Carbamidomethylation                     | C10:Carbamidom<br>ethylation:1000.0<br>0                              | PEAKS<br>DB  |
| N.GIEETIC(+57.02)TASVKK.N               | N    | 76.18  | 1434.7388 | 13     | 0.7  | 718.3771  | 2 | 26.91 | 33       | F33:1250 | OB5944<br>H6<br>Ro.raw  | 3.5109E5            | 8        | 8                       | 345   | 357 | Carbamidomethylation                     | C7:Carbamidomet<br>hylation:1000.00                                   | PEAKS<br>DB  |
| R.Q(-17.03)QPEENAC(+57.02)QFQR.L        | N    | 75.52  | 1516.6365 | 12     | 2.5  | 759.3274  | 2 | 28.03 | 32       | F32:1319 | OB5943<br>H6<br>Ro.raw  | 7.279E3             | 2        | 2                       | 26    | 37  | Pyro-glu from Q;<br>Carbamidomethylation | Q1:Pyro-glu from<br>Q:1000.00;C8:Ca<br>rbamidomethylati<br>on:1000.00 | PEAKS<br>PTM |
| V.PQNFAVAGK.S                           | N    | 75.51  | 930.4923  | 9      | 1.0  | 466.2539  | 2 | 32.32 | 35       | F35:1542 | OB5946<br>H2<br>Ro.raw  | 3.3444E6            | 3        | 3                       | 449   | 457 |                                          |                                                                       | PEAKS<br>DB  |
| R.LESEGGYIETWPNPNQEFEC(+57.02)AGVALSR.L | N    | 74.31  | 3069.3774 | 27     | 1.4  | 1024.1345 | 3 | 34.50 | 31       | F31:1703 | OB5942<br>H6<br>Ro.raw  | 1.0361E4            | 1        | 1                       | 47    | 73  | Carbamidomethylation                     | C20:Carbamidom<br>ethylation:1000.0<br>0                              | PEAKS<br>DB  |
| K.TANDLNLILR.W                          | N    | 73.94  | 1254.7296 | 11     | 1.8  | 628.3732  | 2 | 34.79 | 35       | F35:1750 | OB5946<br>H2<br>Ro.raw  | 1.0437E7            | 10       | 10                      | 377   | 387 |                                          |                                                                       | PEAKS<br>DB  |
| R.QQPEENAC(+57.02)QFQR.L                | N    | 73.76  | 1533.6630 | 12     | 1.7  | 767.8400  | 2 | 25.24 | 32       | F32:1157 | OB5943<br>H6<br>Ro.raw  | 3.7544E4            | 3        | 3                       | 26    | 37  | Carbamidomethylation                     | C8:Carbamidomet<br>hylation:1000.00                                   | PEAKS<br>DB  |
| R.S(+57.02)PDIYNPQAGSLKTANDLNLILR.W     | N    | 64.15  | 2682.4341 | 24     | 1.5  | 895.1533  | 3 | 35.28 | 34       | F34:1735 | OB5945<br>H2<br>Ro.raw  | 9.5441E4            | 1        | 1                       | 364   | 387 |                                          | S1:Carbamidomet<br>hylation (DHKE, X<br>@N-term):14.04                | PEAKS<br>PTM |
| total 79 peptides                       |      |        |           |        |      |           |   |       |          |          |                         |                     |          |                         |       |     |                                          |                                                                       |              |

| Peptide                                          | Uniq | -10lgP | Mass      | Length | ppm  | m/z       | z | RT    | Fraction | Scan     | Source File             | Area Roasted in gel | #Feature | #Feature Roasted in gel | Start | End | PTM                                    | AScore                                                         | Found By  |
|--------------------------------------------------|------|--------|-----------|--------|------|-----------|---|-------|----------|----------|-------------------------|---------------------|----------|-------------------------|-------|-----|----------------------------------------|----------------------------------------------------------------|-----------|
| R.AHVQVVDN(+.98)GNRVYDEELQEGHVLVVPQNFAVAGK.S     | N    | 64.02  | 3817.9023 | 35     | 5.0  | 955.4877  | 4 | 33.04 | 29       | F29:1438 | OB5922<br>H2<br>Ro.raw  | 1.4175E6            | 2        | 2                       | 423   | 457 |                                        | N9:Deamidation (NQ):9.40                                       | PEAKS DB  |
| R.NALFVPH(+57.02)YNTNAHSIIYALR.G                 | N    | 63.66  | 2370.2231 | 20     | 0.1  | 791.0817  | 3 | 34.03 | 35       | F35:1631 | OB5946<br>H2<br>Ro.raw  | 8.9747E5            | 1        | 1                       | 401   | 420 | Carbamidomethylation (DHKE, X@N-term)  | H7:Carbamidomethylation (DHKE, X@N-term):20.35                 | PEAKS PTM |
| R.RFNLAGNHEQEFLRYQQQS.R                          | N    | 62.22  | 2520.2371 | 20     | -2.3 | 631.0667  | 4 | 34.12 | 30       | F30:1496 | OB5926<br>H3B<br>Ro.raw | 7.5688E4            | 2        | 2                       | 197   | 216 |                                        |                                                                | PEAKS DB  |
| R.LNAQRPDNRLESEGGYIETWNPNNQEFEC(+57.02)AGVALSR.L | N    | 60.14  | 4133.9248 | 36     | 2.4  | 1034.4910 | 4 | 33.87 | 33       | F33:1670 | OB5944<br>H6<br>Ro.raw  | 1.5556E6            | 3        | 3                       | 38    | 73  | Carbamidomethylation                   | C29:Carbamidomethylation:1000.00                               | PEAKS DB  |
| R.GYGFGLIFPGC(+57.02)PS(+14.02)YEEPAQQGR.R       | N    | 59.71  | 2487.1528 | 22     | 2.2  | 1244.5864 | 2 | 36.43 | 32       | F32:1817 | OB5943<br>H6<br>Ro.raw  | 7.7963E4            | 3        | 3                       | 100   | 121 | Carbamidomethylation                   | C10:Carbamidomethylation:1000.00;S12:Methylation(others):9.34  | PEAKS PTM |
| R.W(+31.99)LGLSAEYGNLYR.N                        | N    | 59.45  | 1572.7572 | 13     | -1.6 | 787.3846  | 2 | 33.64 | 35       | F35:1624 | OB5946<br>H2<br>Ro.raw  | 8.5976E4            | 2        | 2                       | 388   | 400 | Dihydroxy                              | W1:Dihydroxy:62.93                                             | PEAKS PTM |
| P.FYSNAPQEIFIQQGR.G                              | N    | 59.30  | 1796.8845 | 15     | -1.2 | 899.4484  | 2 | 32.27 | 31       | F31:1574 | OB5942<br>H6<br>Ro.raw  | 0                   | 0        | 0                       | 85    | 99  |                                        |                                                                | PEAKS DB  |
| K.FFVPPSQQ(+.98)SLR.A                            | Y    | 58.48  | 1305.6716 | 11     | 2.9  | 653.8450  | 2 | 30.71 | 31       | F31:1484 | OB5942<br>H6<br>Ro.raw  | 2.0502E5            | 3        | 3                       | 516   | 526 |                                        | Q8:Deamidation (NQ):12.79                                      | PEAKS DB  |
| R.GYGFGLIFPGC(+57.02)PST(+14.02)YEEPAQQGR.R      | N    | 58.14  | 2487.1528 | 22     | 2.8  | 1244.5872 | 2 | 36.17 | 31       | F31:1801 | OB5942<br>H6<br>Ro.raw  | 2.5405E4            | 2        | 2                       | 100   | 121 | Carbamidomethylation                   | C10:Carbamidomethylation:1000.00;T13:Methylation(others):14.02 | PEAKS PTM |
| R.W(+57.02)LGLSAEYGNLYR.N                        | N    | 57.46  | 1597.7888 | 13     | 0.6  | 799.9022  | 2 | 35.09 | 34       | F34:1725 | OB5945<br>H2<br>Ro.raw  | 1.848E4             | 1        | 1                       | 388   | 400 | Carbamidomethylation (DHKE, X@N-term)  | W1:Carbamidomethylation (DHKE, X@N-term):62.19                 | PEAKS PTM |
| R.Q(-17.03)LKNNNPFK.F                            | N    | 56.41  | 1084.5665 | 9      | 1.6  | 543.2914  | 2 | 28.75 | 34       | F34:1346 | OB5945<br>H2<br>Ro.raw  | 1.0606E4            | 2        | 2                       | 507   | 515 | Pyro-glu from Q                        | Q1:Pyro-glu from Q:1000.00                                     | PEAKS PTM |
| R.AHVQVVDNNGN(+.98)RVYDEELQEGHVLVVPQNFAVAGK.S    | N    | 54.09  | 3817.9023 | 35     | 3.2  | 955.4859  | 4 | 32.51 | 34       | F34:1567 | OB5945<br>H2<br>Ro.raw  | 7.3088E4            | 3        | 3                       | 423   | 457 |                                        | N11:Deamidation (NQ):8.22                                      | PEAKS DB  |
| R.Q(+.98)IVQNLRGENESEEEGAIVTK.G                  | Y    | 53.37  | 2442.2236 | 22     | 8.7  | 815.0889  | 3 | 30.23 | 40       | F40:1412 | OB5953<br>H3A<br>Ro.raw | 2.1426E4            | 1        | 1                       | 280   | 301 |                                        | Q1:Deamidation (NQ):16.03                                      | PEAKS DB  |
| K.FFVPPS(+60.00)QQSLR.A                          | Y    | 52.88  | 1364.6910 | 11     | -1.4 | 683.3518  | 2 | 32.82 | 34       | F34:1584 | OB5945<br>H2<br>Ro.raw  | 3.1431E5            | 1        | 1                       | 516   | 526 | 2-OH-ethyl thio-Ser                    | S6:2-OH-ethyl thio-Ser:91.37                                   | PEAKS PTM |
| R.LESEGGYIETWNPNNQ(+.98)EFEC(+57.02)AGVALSR.L    | N    | 52.73  | 3070.3613 | 27     | 6.0  | 1024.4672 | 3 | 34.92 | 32       | F32:1736 | OB5943<br>H6<br>Ro.raw  | 6.6817E3            | 1        | 1                       | 47    | 73  | Deamidation (NQ); Carbamidomethylation | Q16:Deamidation (NQ):1000.00;C20:Carbamidomethylation:1000.00  | PEAKS DB  |
| R.Q(-17.03)IVQNLRGENESEEEGAIVTK.G                | Y    | 52.08  | 2424.2131 | 22     | 4.4  | 1213.1191 | 2 | 31.72 | 38       | F38:1505 | OB5951<br>H3A<br>Ro.raw | 0                   | 0        | 0                       | 280   | 301 | Pyro-glu from Q                        | Q1:Pyro-glu from Q:1000.00                                     | PEAKS PTM |
| R.VYDEELQEGHVLVVPQN(+.98)FAVAGK.S                | N    | 51.23  | 2541.2751 | 23     | 9.5  | 1271.6569 | 2 | 32.92 | 31       | F31:1618 | OB5942<br>H6<br>Ro.raw  | 3.629E3             | 1        | 1                       | 435   | 457 |                                        | N17:Deamidation (NQ):14.02                                     | PEAKS DB  |
| K.TAN(+.98)DLNLLILR.W                            | N    | 50.73  | 1255.7136 | 11     | 2.6  | 628.8657  | 2 | 35.22 | 31       | F31:1745 | OB5942<br>H6<br>Ro.raw  | 0                   | 0        | 0                       | 377   | 387 | Deamidation (NQ)                       | N3:Deamidation (NQ):68.31                                      | PEAKS DB  |
| R.AGQEEENEGGNIFSGFTPEFLAQAFQVDDR.Q               | N    | 50.48  | 3301.4800 | 30     | 4.2  | 1651.7543 | 2 | 40.18 | 39       | F39:1990 | OB5952<br>H3A<br>Ro.raw | 2.7256E5            | 1        | 1                       | 250   | 279 |                                        |                                                                | PEAKS DB  |
| R.S(+57.02)PDIYNPQAGSLK.T                        | N    | 50.29  | 1445.7150 | 13     | 5.7  | 723.8689  | 2 | 28.94 | 34       | F34:1350 | OB5945<br>H2<br>Ro.raw  | 6.4489E3            | 2        | 2                       | 364   | 376 |                                        | S1:Carbamidomethylation (DHKE, X@N-term):14.04                 | PEAKS PTM |
| R.N(+57.02)ALFVPHYNTNAHSIIYALR.G                 | N    | 48.76  | 2370.2231 | 20     | -0.1 | 791.0816  | 3 | 34.53 | 29       | F29:1557 | OB5922<br>H2<br>Ro.raw  | 3.2966E6            | 1        | 1                       | 401   | 420 |                                        | N1:Carbamidomethylation (DHKE, X@N-term):10.82                 | PEAKS PTM |
| R.WLGLSAE(+53.92)YGNLYR.N                        | N    | 48.21  | 1594.6866 | 13     | 0.4  | 532.5697  | 3 | 35.09 | 29       | F29:1579 | OB5922<br>H2<br>Ro.raw  | 6.0447E5            | 3        | 3                       | 388   | 400 | Replacement of 2 protons by iron       | E7:Replacement of 2 protons by iron:123.05                     | PEAKS PTM |
| total 79 peptides                                |      |        |           |        |      |           |   |       |          |          |                         |                     |          |                         |       |     |                                        |                                                                |           |

| Peptide                                            | Uniq | -10lgP | Mass      | Length | ppm  | m/z      | z | RT    | Fraction | Scan     | Source File             | Area Roasted in gel | #Feature | #Feature Roasted in gel | Start | End | PTM                                                                                       | AScore                                                                                                        | Found By  |
|----------------------------------------------------|------|--------|-----------|--------|------|----------|---|-------|----------|----------|-------------------------|---------------------|----------|-------------------------|-------|-----|-------------------------------------------------------------------------------------------|---------------------------------------------------------------------------------------------------------------|-----------|
| N.G(+41.03)IETIC(+57.02)TASVK.K                    | N    | 48.20  | 1347.6704 | 12     | 0.3  | 674.8427 | 2 | 29.12 | 34       | F34:1370 | OB5945<br>H2<br>Ro.raw  | 1.5496E4            | 1        | 1                       | 345   | 356 | Amidination of lysines or N-terminal amines with methyl acetimidate; Carbamidomethylation | G1:Amidination of lysines or N-terminal amines with methyl acetimidate: 96.48;C7:Carbamidomethylation:1000.00 | PEAKS PTM |
| R.SPD(+57.02)IYNPQAGSLK.T                          | N    | 45.16  | 1445.7150 | 13     | 2.2  | 723.8663 | 2 | 29.51 | 29       | F29:1244 | OB5922<br>H2<br>Ro.raw  | 0                   | 0        | 0                       | 364   | 376 |                                                                                           | D3:Carbamidomethylation (DHKE, X@N-term):0.00                                                                 | PEAKS PTM |
| R.NALFVPHYNTNAHSIIYALRG.R                          | N    | 44.84  | 2370.2231 | 21     | 1.2  | 791.0826 | 3 | 33.77 | 34       | F34:1624 | OB5945<br>H2<br>Ro.raw  | 4.2894E6            | 2        | 2                       | 401   | 421 |                                                                                           |                                                                                                               | PEAKS DB  |
| R.QLKNNNPFKFFVPPSQQS.L                             | N    | 42.33  | 2119.0850 | 18     | 1.9  | 707.3703 | 3 | 33.27 | 35       | F35:1604 | OB5946<br>H2<br>Ro.raw  | 6.7737E4            | 1        | 1                       | 507   | 524 |                                                                                           |                                                                                                               | PEAKS DB  |
| K.NNNPFKFFVPPSQQS.L                                | N    | 41.33  | 1749.8474 | 15     | 1.0  | 875.9319 | 2 | 34.91 | 29       | F29:1573 | OB5922<br>H2<br>Ro.raw  | 4.7342E4            | 1        | 1                       | 510   | 524 |                                                                                           |                                                                                                               | PEAKS DB  |
| N.G(+57.02)IETIC(+57.02)TASVKK.N                   | N    | 41.05  | 1491.7603 | 13     | 8.7  | 746.8939 | 2 | 26.96 | 31       | F31:1261 | OB5942<br>H6<br>Ro.raw  | 3.2429E4            | 4        | 4                       | 345   | 357 | Carbamidomethylation (DHKE, X@N-term); Carbamidomethylation                               | G1:Carbamidomethylation (DHKE, X@N-term):32.28; C7:Carbamidomethylation:1000.00                               | PEAKS PTM |
| R.FNLAGNH(+14.02)EQEFLR.Y                          | N    | 40.38  | 1587.7793 | 13     | 0.7  | 530.2674 | 3 | 30.81 | 39       | F39:1450 | OB5952<br>H3A<br>Ro.raw | 1.3642E5            | 3        | 3                       | 198   | 210 | Methylation(others)                                                                       | H7:Methylation(others):33.98                                                                                  | PEAKS PTM |
| K.SQSD(+53.92)NFEYVAFK.T                           | N    | 40.31  | 1487.5656 | 12     | -2.8 | 744.7880 | 2 | 32.03 | 29       | F29:1395 | OB5922<br>H2<br>Ro.raw  | 0                   | 0        | 0                       | 458   | 469 | Replacement of 2 protons by iron                                                          | D4:Replacement of 2 protons by iron:20.50                                                                     | PEAKS PTM |
| R.AHVQVDSNGNRVYDEELQ(+.98)EGHVLVVPQNFAVAGK.S       | N    | 40.20  | 3817.9023 | 35     | 7.9  | 955.4904 | 4 | 33.43 | 35       | F35:1615 | OB5946<br>H2<br>Ro.raw  | 0                   | 0        | 0                       | 423   | 457 |                                                                                           | Q19:Deamidation (NQ):4.91                                                                                     | PEAKS DB  |
| R.AHVQVVDN(+.98)GN(+.98)RVYDEELQEGHVLVVPQNFAVAGK.S | N    | 39.19  | 3818.8862 | 35     | 8.6  | 955.7371 | 4 | 34.33 | 32       | F32:1692 | OB5943<br>H6<br>Ro.raw  | 0                   | 0        | 0                       | 423   | 457 |                                                                                           | N9:Deamidation (NQ):0.00;N11:Deamidation (NQ):0.00                                                            | PEAKS DB  |
| K.TAND(+53.92)LNLLILR.W                            | N    | 38.76  | 1308.6488 | 11     | 0.2  | 655.3318 | 2 | 35.09 | 29       | F29:1584 | OB5922<br>H2<br>Ro.raw  | 8.7715E4            | 1        | 1                       | 377   | 387 | Replacement of 2 protons by iron                                                          | D4:Replacement of 2 protons by iron:55.73                                                                     | PEAKS PTM |
| R.RFNLAGNH(+14.02)EQEFLR.Y                         | N    | 38.64  | 1743.8805 | 14     | 0.5  | 582.3011 | 3 | 31.14 | 38       | F38:1453 | OB5951<br>H3A<br>Ro.raw | 7.3646E5            | 3        | 3                       | 197   | 210 | Methylation(others)                                                                       | H8:Methylation(others):40.00                                                                                  | PEAKS PTM |
| R.AHVQ(+.98)VVDNSNGNRVYDEELQEGHVLVVPQNFAVAGK.S     | N    | 38.57  | 3817.9023 | 35     | 0.9  | 955.4838 | 4 | 33.12 | 31       | F31:1624 | OB5942<br>H6<br>Ro.raw  | 4.5408E4            | 1        | 1                       | 423   | 457 | Deamidation (NQ)                                                                          | Q4:Deamidation (NQ):21.59                                                                                     | PEAKS DB  |
| W.LGLSAEYGNLYR.N                                   | N    | 38.37  | 1354.6881 | 12     | 3.5  | 678.3537 | 2 | 31.68 | 31       | F31:1539 | OB5942<br>H6<br>Ro.raw  | 0                   | 0        | 0                       | 389   | 400 |                                                                                           |                                                                                                               | PEAKS DB  |
| S.ISFRQPEENAC(+57.02)QFQR.L                        | N    | 37.74  | 2036.9486 | 16     | 0.8  | 679.9907 | 3 | 28.84 | 36       | F36:1329 | OB5948<br>H3B<br>Ro.raw | 3.1194E4            | 4        | 4                       | 22    | 37  | Carbamidomethylation                                                                      | C12:Carbamidomethylation:1000.00                                                                              | PEAKS DB  |
| R.G(+57.02)YFGLIFPGC(+57.02)PSTYEPAQQGRR.H         | N    | 37.54  | 2686.2598 | 23     | 1.6  | 896.4286 | 3 | 35.57 | 39       | F39:1718 | OB5952<br>H3A<br>Ro.raw | 5.4933E4            | 1        | 1                       | 100   | 122 | Carbamidomethylation (DHKE, X@N-term); Carbamidomethylation                               | G1:Carbamidomethylation (DHKE, X@N-term):130.55;C10:Carbamidomethylation:1000.00                              | PEAKS PTM |
| R.SLPSPYSP(+31.99)QSQPR.Q                          | N    | 36.19  | 1637.7686 | 14     | 3.2  | 819.8942 | 2 | 27.07 | 38       | F38:1250 | OB5951<br>H3A<br>Ro.raw | 6.6096E3            | 1        | 1                       | 219   | 232 |                                                                                           | P9:Dihydroxy:9.42                                                                                             | PEAKS PTM |
| R.NALFVPHYNTNAHSIIYALRGR.A                         | N    | 36.04  | 2526.3245 | 22     | 0.6  | 843.1160 | 3 | 33.60 | 29       | F29:1492 | OB5922<br>H2<br>Ro.raw  | 7.6168E5            | 2        | 2                       | 401   | 422 |                                                                                           |                                                                                                               | PEAKS DB  |
| R.R(+14.02)FNLAGNHEQEFLR.Y                         | N    | 34.57  | 1743.8805 | 14     | 0.9  | 582.3013 | 3 | 31.38 | 39       | F39:1472 | OB5952<br>H3A<br>Ro.raw | 2.9356E5            | 2        | 2                       | 197   | 210 | Methylation(KR)                                                                           | R1:Methylation(KR):67.58                                                                                      | PEAKS PTM |
| R.WLGLSAEYGN(+.98)LYR.N                            | N    | 33.97  | 1541.7513 | 13     | 5.4  | 771.8871 | 2 | 54.24 | 29       | F29:2679 | OB5922<br>H2<br>Ro.raw  | 0                   | 0        | 0                       | 388   | 400 | Deamidation (NQ)                                                                          | N10:Deamidation (NQ):1000.00                                                                                  | PEAKS DB  |
| total 79 peptides                                  |      |        |           |        |      |          |   |       |          |          |                         |                     |          |                         |       |     |                                                                                           |                                                                                                               |           |



| Peptide                                                | Uniq | -10lgP | Mass      | Length | ppm  | m/z       | z | RT    | Fraction | Scan     | Source File             | Area Roasted in gel | #Feature | #Feature Roasted in gel | Start | End | PTM                                    | AScore                                                        | Found By     |
|--------------------------------------------------------|------|--------|-----------|--------|------|-----------|---|-------|----------|----------|-------------------------|---------------------|----------|-------------------------|-------|-----|----------------------------------------|---------------------------------------------------------------|--------------|
| R.RPFYSNAP(+15.99)QEIFIQQGR.G                          | N    | 33.55  | 2066.0332 | 17     | 0.2  | 689.6852  | 3 | 31.94 | 40       | F40:1497 | OB5953<br>H3A<br>Ro.raw | 4.3282E4            | 1        | 1                       | 83    | 99  | Oxidation or Hydroxylation             | P8:Oxidation or Hydroxylation:32.28                           | PEAKS<br>PTM |
| R.AHVQ(+.98)VVDSNGNRVYDEELQEGHVLVVPQ(+.98)NFAVAGK.S    | N    | 33.38  | 3818.8862 | 35     | 8.9  | 955.7373  | 4 | 33.12 | 31       | F31:1624 | OB5942<br>H6<br>Ro.raw  | 3.8034E4            | 1        | 1                       | 423   | 457 |                                        | Q4:Deamidation (NQ):8.81;Q28:Deamidation (NQ):12.28           | PEAKS<br>DB  |
| R.FNLAGNH(+156.12)EQEFLR.Y                             | N    | 33.01  | 1729.8788 | 13     | -7.6 | 577.6292  | 3 | 31.13 | 38       | F38:1444 | OB5951<br>H3A<br>Ro.raw | 7.0376E5            | 2        | 2                       | 198   | 210 | 4-hydroxynonenal (HNE)                 | H7:4-hydroxynonenal (HNE):1000.00                             | PEAKS<br>PTM |
| R.N(+.98)ALFVPHYNTNAHSIIYALR.G                         | N    | 32.68  | 2314.1858 | 20     | 7.3  | 772.4082  | 3 | 50.66 | 29       | F29:2450 | OB5922<br>H2<br>Ro.raw  | 1.0573E4            | 1        | 1                       | 401   | 420 |                                        | N1:Deamidation (NQ):0.00                                      | PEAKS<br>DB  |
| R.LESEGGYIETWN(+.98)PNNQEFEC(+57.02)AGVALSR.L          | N    | 32.58  | 3070.3613 | 27     | 6.9  | 1536.1985 | 2 | 34.73 | 32       | F32:1729 | OB5943<br>H6<br>Ro.raw  | 2.6575E4            | 1        | 1                       | 47    | 73  | Deamidation (NQ); Carbamidomethylation | N12:Deamidation (NQ):1000.00;C20:Carbamidomethylation:1000.00 | PEAKS<br>DB  |
| R.AGQEEENEGGNIFSGFTPEFLAQAFQVDDRQIVQNL.R.G             | N    | 32.18  | 4152.9775 | 37     | 5.2  | 1385.3403 | 3 | 39.54 | 38       | F38:1958 | OB5951<br>H3A<br>Ro.raw | 1.056E5             | 1        | 1                       | 250   | 286 |                                        |                                                               | PEAKS<br>DB  |
| R.WLGLSAE(+21.98)YGNLYR.N                              | N    | 30.00  | 1562.7494 | 13     | -8.4 | 782.3754  | 2 | 35.27 | 29       | F29:1583 | OB5922<br>H2<br>Ro.raw  | 5.0047E4            | 2        | 2                       | 388   | 400 | Sodium adduct                          | E7:Sodium adduct:42.78                                        | PEAKS<br>PTM |
| R.LNAQRPDNRLESEGGYIETWNPNN(+.98)QEFEC(+57.02)AGVALSR.L | N    | 29.77  | 4134.9087 | 36     | 4.7  | 1379.3167 | 3 | 33.85 | 33       | F33:1671 | OB5944<br>H6<br>Ro.raw  | 8.0788E4            | 1        | 1                       | 38    | 73  | Deamidation (NQ); Carbamidomethylation | N24:Deamidation (NQ):1000.00;C29:Carbamidomethylation:1000.00 | PEAKS<br>DB  |
| R.W(+15.99)LGLSAEYGNLYR.N                              | N    | 28.45  | 1556.7623 | 13     | -0.8 | 779.3878  | 2 | 34.26 | 31       | F31:1698 | OB5942<br>H6<br>Ro.raw  | 3.8864E3            | 1        | 1                       | 388   | 400 | Oxidation (HW)                         | W1:Oxidation (HW):1000.00                                     | PEAKS<br>PTM |
| total 79 peptides                                      |      |        |           |        |      |           |   |       |          |          |                         |                     |          |                         |       |     |                                        |                                                               |              |

B5TYU1|B5TYU1\_ARAHY

back to list

| [Protein Coverage](#) | [Supporting Peptides](#) |

Protein Coverage:

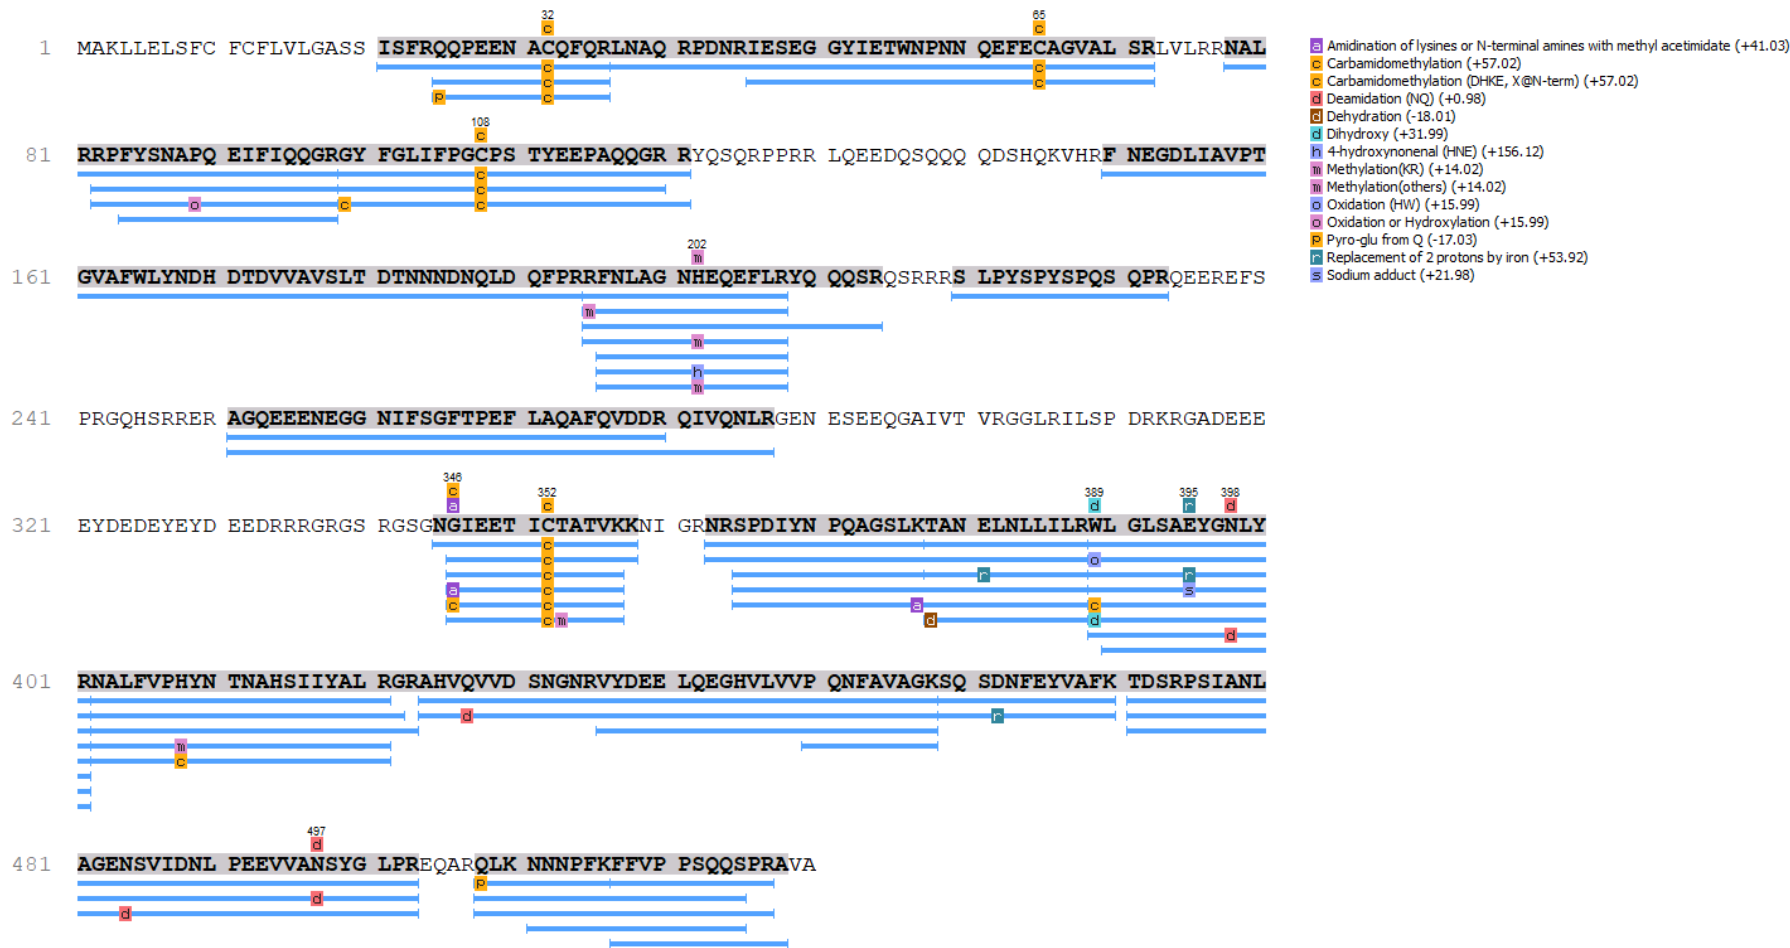

Supporting Peptides:

| Peptide                            | Uniq | -10lgP | Mass      | Length | ppm | m/z       | z | RT    | Fraction | Scan     | Source File       | Area Roasted in gel | #Feature | #Feature Roasted in gel | Start | End | PTM                  | AScore                           | Found By |
|------------------------------------|------|--------|-----------|--------|-----|-----------|---|-------|----------|----------|-------------------|---------------------|----------|-------------------------|-------|-----|----------------------|----------------------------------|----------|
| R.NALFVPHYNTNAHSIIYALR.G           | N    | 134.27 | 2313.2019 | 20     | 3.7 | 1157.6125 | 2 | 33.79 | 29       | F29:1486 | OB5922 H2 Ro.raw  | 5.1511E7            | 23       | 23                      | 402   | 421 |                      |                                  | PEAKS DB |
| R.GYFGLIFPGC(+57.02)PSTYEEPAQQGR.R | N    | 127.83 | 2473.1372 | 22     | 3.0 | 1237.5796 | 2 | 36.11 | 38       | F38:1750 | OB5951 H3A Ro.raw | 2.5988E6            | 9        | 9                       | 99    | 120 | Carbamidomethylation | C10:Carbamidomethylation:1000.00 | PEAKS DB |
| R.SPDIYNPQAGSLKTANELNLLILR.W       | N    | 125.09 | 2639.4282 | 24     | 2.1 | 880.8185  | 3 | 35.72 | 35       | F35:1738 | OB5946 H2 Ro.raw  | 6.3847E6            | 8        | 7                       | 365   | 388 |                      |                                  | PEAKS DB |
| R.WGLSLAEYGNLYR.N                  | N    | 121.81 | 1540.7673 | 13     | 2.8 | 771.3931  | 2 | 34.72 | 34       | F34:1730 | OB5945 H2 Ro.raw  | 5.9147E7            | 35       | 35                      | 389   | 401 |                      |                                  | PEAKS DB |
| R.NRSPDIYNPQAGSLKTANELNLLILR.W     | N    | 119.99 | 2909.5723 | 26     | 2.3 | 970.8669  | 3 | 34.91 | 29       | F29:1560 | OB5922 H2 Ro.raw  | 3.3615E6            | 6        | 6                       | 363   | 388 |                      |                                  | PEAKS DB |
| K.SQSDNFEYVAFK.T                   | N    | 114.21 | 1433.6462 | 12     | 2.6 | 717.8323  | 2 | 31.76 | 35       | F35:1518 | OB5946 H2 Ro.raw  | 5.4437E6            | 6        | 6                       | 459   | 470 |                      |                                  | PEAKS DB |
| total 83 peptides                  |      |        |           |        |     |           |   |       |          |          |                   |                     |          |                         |       |     |                      |                                  |          |

| Peptide                                     | Uniq | -10lgP | Mass      | Length | ppm  | m/z       | z | RT    | Fraction | Scan     | Source File             | Area Roasted in gel | #Feature | #Feature Roasted in gel | Start | End | PTM                                                         | AScore                                                                         | Found By  |
|---------------------------------------------|------|--------|-----------|--------|------|-----------|---|-------|----------|----------|-------------------------|---------------------|----------|-------------------------|-------|-----|-------------------------------------------------------------|--------------------------------------------------------------------------------|-----------|
| R.RPFYSNAPQEIFIQQGR.G                       | N    | 110.90 | 2050.0383 | 17     | 3.2  | 684.3556  | 3 | 31.52 | 38       | F38:1483 | OB5951<br>H3A<br>Ro.raw | 9.1631E6            | 15       | 15                      | 82    | 98  |                                                             |                                                                                | PEAKS DB  |
| K.TDSRPSIANLAGENSVIDNLPEEVVANSYGLPR.E       | Y    | 107.61 | 3496.7434 | 33     | 2.2  | 1166.5909 | 3 | 36.86 | 35       | F35:1804 | OB5946<br>H2<br>Ro.raw  | 1.9989E7            | 11       | 11                      | 471   | 503 |                                                             |                                                                                | PEAKS DB  |
| R.NALRRPFYSNAPQEIFIQQGR.G                   | N    | 97.93  | 2504.3037 | 21     | 1.0  | 835.7760  | 3 | 32.71 | 40       | F40:1535 | OB5953<br>H3A<br>Ro.raw | 6.3111E6            | 14       | 13                      | 78    | 98  |                                                             |                                                                                | PEAKS DB  |
| R.NRSPDIYNPQAGSLK.T                         | N    | 96.54  | 1658.8376 | 15     | 0.1  | 830.4261  | 2 | 27.65 | 32       | F32:1291 | OB5943<br>H6<br>Ro.raw  | 8.0621E5            | 12       | 12                      | 363   | 377 |                                                             |                                                                                | PEAKS DB  |
| N.GIEETIC(+57.02)TATVK.K                    | N    | 95.04  | 1320.6595 | 12     | -0.2 | 661.3369  | 2 | 29.91 | 29       | F29:1260 | OB5922<br>H2<br>Ro.raw  | 2.5094E5            | 6        | 6                       | 346   | 357 | Carbamidomethylation                                        | C7:Carbamidomethylation:1000.00                                                | PEAKS DB  |
| R.SPDIYNPQAGSLK.T                           | N    | 92.16  | 1388.6936 | 13     | 1.7  | 695.3552  | 2 | 28.58 | 34       | F34:1323 | OB5945<br>H2<br>Ro.raw  | 1.33E6              | 6        | 6                       | 365   | 377 |                                                             |                                                                                | PEAKS DB  |
| R.FNLAGNHEQEFLR.Y                           | N    | 91.88  | 1573.7637 | 13     | 4.3  | 787.8925  | 2 | 30.57 | 38       | F38:1440 | OB5951<br>H3A<br>Ro.raw | 1.243E5             | 7        | 7                       | 196   | 208 |                                                             |                                                                                | PEAKS DB  |
| R.VYDEELQEGHVLVVPQNFAVAGK.S                 | N    | 90.91  | 2540.2910 | 23     | 1.4  | 847.7721  | 3 | 33.42 | 29       | F29:1478 | OB5922<br>H2<br>Ro.raw  | 1.9062E6            | 10       | 10                      | 436   | 458 |                                                             |                                                                                | PEAKS DB  |
| R.RFNLAGNHEQEFLR.Y                          | N    | 87.38  | 1729.8647 | 14     | 1.5  | 577.6297  | 3 | 31.36 | 40       | F40:1478 | OB5953<br>H3A<br>Ro.raw | 1.8294E6            | 7        | 7                       | 195   | 208 |                                                             |                                                                                | PEAKS DB  |
| N.GIEETIC(+57.02)TATVKK.N                   | N    | 82.16  | 1448.7545 | 13     | 0.7  | 725.3850  | 2 | 27.45 | 31       | F31:1292 | OB5942<br>H6<br>Ro.raw  | 4.6237E5            | 5        | 5                       | 346   | 358 | Carbamidomethylation                                        | C7:Carbamidomethylation:1000.00                                                | PEAKS DB  |
| R.NALFVPH(+14.02)YNTNAHSIIYALR.G            | N    | 79.80  | 2327.2175 | 20     | 0.7  | 776.7470  | 3 | 34.91 | 29       | F29:1561 | OB5922<br>H2<br>Ro.raw  | 1.3103E6            | 3        | 3                       | 402   | 421 | Methylation(others)                                         | H7:Methylation(others):22.45                                                   | PEAKS PTM |
| R.AHVQVVDSSNGNRVYDEELQEGHVLVVPQNFAVAGK.S    | N    | 77.75  | 3816.9182 | 35     | 3.6  | 955.2402  | 4 | 32.32 | 35       | F35:1544 | OB5946<br>H2<br>Ro.raw  | 8.2893E6            | 8        | 8                       | 424   | 458 |                                                             |                                                                                | PEAKS DB  |
| R.GYFGLIFPGC(+57.02)PSTYEEPAQQGRR.Y         | N    | 76.83  | 2629.2383 | 23     | 2.4  | 877.4221  | 3 | 35.18 | 40       | F40:1676 | OB5953<br>H3A<br>Ro.raw | 5.6622E6            | 9        | 9                       | 99    | 121 | Carbamidomethylation                                        | C10:Carbamidomethylation:1000.00                                               | PEAKS DB  |
| K.TANELNLLILR.W                             | N    | 76.42  | 1268.7452 | 11     | 0.6  | 635.3802  | 2 | 35.27 | 29       | F29:1655 | OB5922<br>H2<br>Ro.raw  | 2.1461E7            | 10       | 10                      | 378   | 388 |                                                             |                                                                                | PEAKS DB  |
| R.Q(-17.03)QPEENAC(+57.02)QFQR.L            | N    | 75.52  | 1516.6365 | 12     | 2.5  | 759.3274  | 2 | 28.03 | 32       | F32:1319 | OB5943<br>H6<br>Ro.raw  | 7.279E3             | 2        | 2                       | 25    | 36  | Pyro-glu from Q; Carbamidomethylation                       | Q1:Pyro-glu from Q:1000.00;C8:Carbamidomethylation:1000.00                     | PEAKS PTM |
| V.PQNFAVAGK.S                               | N    | 75.51  | 930.4923  | 9      | 1.0  | 466.2539  | 2 | 32.32 | 35       | F35:1542 | OB5946<br>H2<br>Ro.raw  | 3.3444E6            | 3        | 3                       | 450   | 458 |                                                             |                                                                                | PEAKS DB  |
| K.TDSRPSIANLAGENSVIDNLPEEVVAN(+.98)SYGLPR.E | Y    | 74.76  | 3497.7273 | 33     | 1.1  | 1166.9176 | 3 | 35.87 | 34       | F34:1763 | OB5945<br>H2<br>Ro.raw  | 0                   | 0        | 0                       | 471   | 503 | Deamidation (NQ)                                            | N27:Deamidation (NQ):83.90                                                     | PEAKS DB  |
| R.IESEGGYIETWPNPNQEFEC(+57.02)AGVALSR.L     | N    | 74.31  | 3069.3774 | 27     | 1.4  | 1024.1345 | 3 | 34.50 | 31       | F31:1703 | OB5942<br>H6<br>Ro.raw  | 1.0361E4            | 1        | 1                       | 46    | 72  | Carbamidomethylation                                        | C20:Carbamidomethylation:1000.00                                               | PEAKS DB  |
| R.QQPEENAC(+57.02)QFQR.L                    | N    | 73.76  | 1533.6630 | 12     | 1.7  | 767.8400  | 2 | 25.24 | 32       | F32:1157 | OB5943<br>H6<br>Ro.raw  | 3.7544E4            | 3        | 3                       | 25    | 36  | Carbamidomethylation                                        | C8:Carbamidomethylation:1000.00                                                | PEAKS DB  |
| K.FFVPPSQQSPR.A                             | N    | 69.38  | 1288.6564 | 11     | 0.2  | 645.3356  | 2 | 28.58 | 32       | F32:1346 | OB5943<br>H6<br>Ro.raw  | 2.1108E5            | 5        | 5                       | 517   | 527 |                                                             |                                                                                | PEAKS DB  |
| N.G(+57.02)IETIC(+57.02)TATVK.K             | N    | 64.33  | 1377.6809 | 12     | 2.0  | 689.8491  | 2 | 30.19 | 29       | F29:1285 | OB5922<br>H2<br>Ro.raw  | 5.5841E3            | 1        | 1                       | 346   | 357 | Carbamidomethylation (DHKE, X@N-term); Carbamidomethylation | G1:Carbamidomethylation (DHKE, X@N-term):30.83;C7:Carbamidomethylation:1000.00 | PEAKS PTM |
| total 83 peptides                           |      |        |           |        |      |           |   |       |          |          |                         |                     |          |                         |       |     |                                                             |                                                                                |           |

| Peptide                                           | Uniq | -10lgP | Mass      | Length | ppm  | m/z       | z | RT    | Fraction | Scan     | Source File             | Area Roasted in gel | #Feature | #Feature Roasted in gel | Start | End | PTM                                         | AScore                                                         | Found By  |
|---------------------------------------------------|------|--------|-----------|--------|------|-----------|---|-------|----------|----------|-------------------------|---------------------|----------|-------------------------|-------|-----|---------------------------------------------|----------------------------------------------------------------|-----------|
| R.AHVQVVDN(+.98)GNRVYDEELQEGHVLVVPQNFAVAGK.S      | N    | 64.02  | 3817.9023 | 35     | 5.0  | 955.4877  | 4 | 33.04 | 29       | F29:1438 | OB5922<br>H2<br>Ro.raw  | 1.4175E6            | 2        | 2                       | 424   | 458 |                                             | N9:Deamidation (NQ):9.40                                       | PEAKS DB  |
| R.NALFVPH(+57.02)YNTNAHSIIYALR.G                  | N    | 63.66  | 2370.2231 | 20     | 0.1  | 791.0817  | 3 | 34.03 | 35       | F35:1631 | OB5946<br>H2<br>Ro.raw  | 8.9747E5            | 1        | 1                       | 402   | 421 | Carbamidomethylation (DHKE, X@N-term):20.35 | H7:Carbamidomethylation (DHKE, X@N-term):20.35                 | PEAKS PTM |
| K.TDSRPSIANLAGEN(+.98)SVIDNLPEEVVANSYGLPR.E       | Y    | 63.57  | 3497.7273 | 33     | 9.1  | 1166.9270 | 3 | 36.70 | 36       | F36:1801 | OB5948<br>H3B<br>Ro.raw | 1.1598E5            | 2        | 2                       | 471   | 503 | Deamidation (NQ)                            | N14:Deamidation (NQ):39.44                                     | PEAKS DB  |
| R.RFNLAGNHEQEFLRYQQQR.Q                           | N    | 62.22  | 2520.2371 | 20     | -2.3 | 631.0667  | 4 | 34.12 | 30       | F30:1496 | OB5926<br>H3B<br>Ro.raw | 7.5688E4            | 2        | 2                       | 195   | 214 |                                             |                                                                | PEAKS DB  |
| R.LNAQRPDNRIESEGGYIETWNPNNQEFEC(+57.02)AGVALSR.L  | N    | 60.14  | 4133.9248 | 36     | 2.4  | 1034.4910 | 4 | 33.87 | 33       | F33:1670 | OB5944<br>H6<br>Ro.raw  | 1.5556E6            | 3        | 3                       | 37    | 72  | Carbamidomethylation                        | C29:Carbamidomethylation:1000.00                               | PEAKS DB  |
| R.GYFGLIFPGC(+57.02)PS(+14.02)TYEPAQQGR.R         | N    | 59.71  | 2487.1528 | 22     | 2.2  | 1244.5864 | 2 | 36.43 | 32       | F32:1817 | OB5943<br>H6<br>Ro.raw  | 7.7963E4            | 3        | 3                       | 99    | 120 | Carbamidomethylation                        | C10:Carbamidomethylation:1000.00;S12:Methylation(others):9.34  | PEAKS PTM |
| R.W(+31.99)LGLSAEYGNLYR.N                         | N    | 59.45  | 1572.7572 | 13     | -1.6 | 787.3846  | 2 | 33.64 | 35       | F35:1624 | OB5946<br>H2<br>Ro.raw  | 8.5976E4            | 2        | 2                       | 389   | 401 | Dihydroxy                                   | W1:Dihydroxy:62.93                                             | PEAKS PTM |
| P.FYSNAPQEIFIQQGR.G                               | N    | 59.30  | 1796.8845 | 15     | -1.2 | 899.4484  | 2 | 32.27 | 31       | F31:1574 | OB5942<br>H6<br>Ro.raw  | 0                   | 0        | 0                       | 84    | 98  |                                             |                                                                | PEAKS DB  |
| R.FNEGDLIAVPTGVAFWLYNDHDTDVVAVSLTDTNNNDNQLDQFPR.R | N    | 58.15  | 5049.3691 | 45     | 0.7  | 1684.1357 | 3 | 40.24 | 30       | F30:1843 | OB5926<br>H3B<br>Ro.raw | 9.8654E5            | 1        | 1                       | 150   | 194 |                                             |                                                                | PEAKS DB  |
| R.GYFGLIFPGC(+57.02)PST(+14.02)YEEPAQQGR.R        | N    | 58.14  | 2487.1528 | 22     | 2.8  | 1244.5872 | 2 | 36.17 | 31       | F31:1801 | OB5942<br>H6<br>Ro.raw  | 2.5405E4            | 2        | 2                       | 99    | 120 | Carbamidomethylation                        | C10:Carbamidomethylation:1000.00;T13:Methylation(others):14.02 | PEAKS PTM |
| R.W(+57.02)LGLSAEYGNLYR.N                         | N    | 57.46  | 1597.7888 | 13     | 0.6  | 799.9022  | 2 | 35.09 | 34       | F34:1725 | OB5945<br>H2<br>Ro.raw  | 1.848E4             | 1        | 1                       | 389   | 401 | Carbamidomethylation (DHKE, X@N-term)       | W1:Carbamidomethylation (DHKE, X@N-term):62.19                 | PEAKS PTM |
| R.Q(-17.03)LKNNNPFK.F                             | N    | 56.41  | 1084.5665 | 9      | 1.6  | 543.2914  | 2 | 28.75 | 34       | F34:1346 | OB5945<br>H2<br>Ro.raw  | 1.0606E4            | 2        | 2                       | 508   | 516 | Pyro-glu from Q                             | Q1:Pyro-glu from Q:1000.00                                     | PEAKS PTM |
| R.AHVQVVDNNGN(+.98)RVYDEELQEGHVLVVPQNFAVAGK.S     | N    | 54.09  | 3817.9023 | 35     | 3.2  | 955.4859  | 4 | 32.51 | 34       | F34:1567 | OB5945<br>H2<br>Ro.raw  | 7.3088E4            | 3        | 3                       | 424   | 458 |                                             | N11:Deamidation (NQ):8.22                                      | PEAKS DB  |
| R.IESEGGYIETWNPNNQ(+.98)EFEC(+57.02)AGVALSR.L     | N    | 52.73  | 3070.3613 | 27     | 6.0  | 1024.4672 | 3 | 34.92 | 32       | F32:1736 | OB5943<br>H6<br>Ro.raw  | 6.6817E3            | 1        | 1                       | 46    | 72  | Carbamidomethylation                        | Q16:Deamidation (NQ):0.00;C20:Carbamidomethylation:1000.00     | PEAKS DB  |
| K.FFVPPSQSQSPRA.V                                 | N    | 51.84  | 1359.6935 | 12     | 1.1  | 680.8547  | 2 | 29.14 | 32       | F32:1381 | OB5943<br>H6<br>Ro.raw  | 3.8841E4            | 2        | 2                       | 517   | 528 |                                             |                                                                | PEAKS DB  |
| R.VYDEELQEGHVLVVPQN(+.98)FAVAGK.S                 | N    | 51.23  | 2541.2751 | 23     | 9.5  | 1271.6569 | 2 | 32.92 | 31       | F31:1618 | OB5942<br>H6<br>Ro.raw  | 3.629E3             | 1        | 1                       | 436   | 458 |                                             | N17:Deamidation (NQ):14.02                                     | PEAKS DB  |
| R.AGQEEENEGGNIFSGFTPEFLAQAFQVDDR.Q                | N    | 50.48  | 3301.4800 | 30     | 4.2  | 1651.7543 | 2 | 40.18 | 39       | F39:1990 | OB5952<br>H3A<br>Ro.raw | 2.7256E5            | 1        | 1                       | 251   | 280 |                                             |                                                                | PEAKS DB  |
| R.S(+57.02)PDIYNPQAGSLK.T                         | N    | 50.29  | 1445.7150 | 13     | 5.7  | 723.8689  | 2 | 28.94 | 34       | F34:1350 | OB5945<br>H2<br>Ro.raw  | 6.4489E3            | 2        | 2                       | 365   | 377 |                                             | S1:Carbamidomethylation (DHKE, X@N-term):14.04                 | PEAKS PTM |
| K.TANE(+53.92)LNLLILR.W                           | N    | 48.78  | 1322.6646 | 11     | -1.4 | 662.3386  | 2 | 35.27 | 29       | F29:1590 | OB5922<br>H2<br>Ro.raw  | 2.333E5             | 1        | 1                       | 378   | 388 | Replacement of 2 protons by iron            | E4:Replacement of 2 protons by iron:154.98                     | PEAKS PTM |
| R.N(+57.02)ALFVPHYNTNAHSIIYALR.G                  | N    | 48.76  | 2370.2231 | 20     | -0.1 | 791.0816  | 3 | 34.53 | 29       | F29:1557 | OB5922<br>H2<br>Ro.raw  | 3.2966E6            | 1        | 1                       | 402   | 421 |                                             | N1:Carbamidomethylation (DHKE, X@N-term):10.82                 | PEAKS PTM |
| R.WLGLSAE(+53.92)YGNLYR.N                         | N    | 48.21  | 1594.6866 | 13     | 0.4  | 532.5697  | 3 | 35.09 | 29       | F29:1579 | OB5922<br>H2<br>Ro.raw  | 6.0447E5            | 3        | 3                       | 389   | 401 | Replacement of 2 protons by iron            | E7:Replacement of 2 protons by iron:123.05                     | PEAKS PTM |
| R.SPD(+57.02)IYNPQAGSLK.T                         | N    | 45.16  | 1445.7150 | 13     | 2.2  | 723.8663  | 2 | 29.51 | 29       | F29:1244 | OB5922<br>H2<br>Ro.raw  | 0                   | 0        | 0                       | 365   | 377 |                                             | D3:Carbamidomethylation (DHKE, X@N-term):0.00                  | PEAKS PTM |
| total 83 peptides                                 |      |        |           |        |      |           |   |       |          |          |                         |                     |          |                         |       |     |                                             |                                                                |           |

| Peptide                                              | Uniq | -10lgP | Mass      | Length | ppm  | m/z       | z | RT    | Fraction | Scan     | Source File             | Area Roasted in gel | #Feature | #Feature Roasted in gel | Start | End | PTM                                                                                       | AScore                                                                                                       | Found By  |
|------------------------------------------------------|------|--------|-----------|--------|------|-----------|---|-------|----------|----------|-------------------------|---------------------|----------|-------------------------|-------|-----|-------------------------------------------------------------------------------------------|--------------------------------------------------------------------------------------------------------------|-----------|
| R.NALFVPHYNTNAHSIIYALRG.R                            | N    | 44.84  | 2370.2231 | 21     | 1.2  | 791.0826  | 3 | 33.77 | 34       | F34:1624 | OB5945<br>H2<br>Ro.raw  | 4.2894E6            | 2        | 2                       | 402   | 422 |                                                                                           |                                                                                                              | PEAKS DB  |
| N.GIEETIC(+57.02)T(+14.02)ATVK.K                     | N    | 42.70  | 1334.6752 | 12     | 3.2  | 668.3470  | 2 | 29.62 | 34       | F34:1395 | OB5945<br>H2<br>Ro.raw  | 7.3781E3            | 1        | 1                       | 346   | 357 | Carbamidomethylation; Methylation(others)                                                 | C7:Carbamidomethylation:1000.00;T8:Methylation(others):28.36                                                 | PEAKS PTM |
| R.QLKNNNPFKFFVPPSQS.P                                | N    | 42.33  | 2119.0850 | 18     | 1.9  | 707.3703  | 3 | 33.27 | 35       | F35:1604 | OB5946<br>H2<br>Ro.raw  | 6.7737E4            | 1        | 1                       | 508   | 525 |                                                                                           |                                                                                                              | PEAKS DB  |
| K.NNNPFKFFVPPSQS.P                                   | N    | 41.33  | 1749.8474 | 15     | 1.0  | 875.9319  | 2 | 34.91 | 29       | F29:1573 | OB5922<br>H2<br>Ro.raw  | 4.7342E4            | 1        | 1                       | 511   | 525 |                                                                                           |                                                                                                              | PEAKS DB  |
| R.FNLAGNH(+14.02)EQEFLR.Y                            | N    | 40.38  | 1587.7793 | 13     | 0.7  | 530.2674  | 3 | 30.81 | 39       | F39:1450 | OB5952<br>H3A<br>Ro.raw | 1.3642E5            | 3        | 3                       | 196   | 208 | Methylation(others)                                                                       | H7:Methylation(others):33.98                                                                                 | PEAKS PTM |
| K.SQSD(+53.92)NFEYVAFK.T                             | N    | 40.31  | 1487.5656 | 12     | -2.8 | 744.7880  | 2 | 32.03 | 29       | F29:1395 | OB5922<br>H2<br>Ro.raw  | 0                   | 0        | 0                       | 459   | 470 | Replacement of 2 protons by iron                                                          | D4:Replacement of 2 protons by iron:20.50                                                                    | PEAKS PTM |
| R.AHVQVVDNSNGNRVYDEELQ(+.98)EGHVLVVPQNFAVAGK.S       | N    | 40.20  | 3817.9023 | 35     | 7.9  | 955.4904  | 4 | 33.43 | 35       | F35:1615 | OB5946<br>H2<br>Ro.raw  | 0                   | 0        | 0                       | 424   | 458 |                                                                                           | Q19:Deamidation (NQ):4.91                                                                                    | PEAKS DB  |
| R.AHVQVVDNSN(+.98)GN(+.98)RVYDEELQEGHVLVVPQNFAVAGK.S | N    | 39.19  | 3818.8862 | 35     | 8.6  | 955.7371  | 4 | 34.33 | 32       | F32:1692 | OB5943<br>H6<br>Ro.raw  | 0                   | 0        | 0                       | 424   | 458 |                                                                                           | N9:Deamidation (NQ):0.00;N11:Deamidation (NQ):0.00                                                           | PEAKS DB  |
| R.RFNLAGNH(+14.02)EQEFLR.Y                           | N    | 38.64  | 1743.8805 | 14     | 0.5  | 582.3011  | 3 | 31.14 | 38       | F38:1453 | OB5951<br>H3A<br>Ro.raw | 7.3646E5            | 3        | 3                       | 195   | 208 | Methylation(others)                                                                       | H8:Methylation(others):40.00                                                                                 | PEAKS PTM |
| R.AHVQ(+.98)VVDNSNGNRVYDEELQEGHVLVVPQNFAVAGK.S       | N    | 38.57  | 3817.9023 | 35     | 0.9  | 955.4838  | 4 | 33.12 | 31       | F31:1624 | OB5942<br>H6<br>Ro.raw  | 4.5408E4            | 1        | 1                       | 424   | 458 | Deamidation (NQ)                                                                          | Q4:Deamidation (NQ):21.59                                                                                    | PEAKS DB  |
| W.LGLSAEYGNLYR.N                                     | N    | 38.37  | 1354.6881 | 12     | 3.5  | 678.3537  | 2 | 31.68 | 31       | F31:1539 | OB5942<br>H6<br>Ro.raw  | 0                   | 0        | 0                       | 390   | 401 |                                                                                           |                                                                                                              | PEAKS DB  |
| S.ISFRQQPEENAC(+57.02)QFQR.L                         | N    | 37.74  | 2036.9486 | 16     | 0.8  | 679.9907  | 3 | 28.84 | 36       | F36:1329 | OB5948<br>H3B<br>Ro.raw | 3.1194E4            | 4        | 4                       | 21    | 36  | Carbamidomethylation                                                                      | C12:Carbamidomethylation:1000.00                                                                             | PEAKS DB  |
| R.G(+57.02)YFGLIFPGC(+57.02)PSTYEPAQGGRR.Y           | N    | 37.54  | 2686.2598 | 23     | 1.6  | 896.4286  | 3 | 35.57 | 39       | F39:1718 | OB5952<br>H3A<br>Ro.raw | 5.4933E4            | 1        | 1                       | 99    | 121 | Carbamidomethylation (DHKE, X@N-term); Carbamidomethylation                               | G1:Carbamidomethylation (DHKE, X@N-term):130.55;C10:Carbamidomethylation:100.00                              | PEAKS PTM |
| N.G(+41.03)IETIC(+57.02)TATVK.K                      | N    | 36.93  | 1361.6860 | 12     | 0.7  | 681.8508  | 2 | 29.66 | 34       | F34:1390 | OB5945<br>H2<br>Ro.raw  | 1.6824E4            | 1        | 1                       | 346   | 357 | Amidination of lysines or N-terminal amines with methyl acetimidate; Carbamidomethylation | G1:Amidination of lysines or N-terminal amines with methyl acetimidate:96.48;C7:Carbamidomethylation:1000.00 | PEAKS PTM |
| R.SLPSPSP(+31.99)QSQPR.Q                             | N    | 36.19  | 1637.7686 | 14     | 3.2  | 819.8942  | 2 | 27.07 | 38       | F38:1250 | OB5951<br>H3A<br>Ro.raw | 6.6096E3            | 1        | 1                       | 220   | 233 |                                                                                           | P9:Dihydroxy:9.42                                                                                            | PEAKS PTM |
| R.NALFVPHYNTNAHSIIYALRGR.A                           | N    | 36.04  | 2526.3245 | 22     | 0.6  | 843.1160  | 3 | 33.60 | 29       | F29:1492 | OB5922<br>H2<br>Ro.raw  | 7.6168E5            | 2        | 2                       | 402   | 423 |                                                                                           |                                                                                                              | PEAKS DB  |
| R.R(+14.02)FNLAGNHEQEFLR.Y                           | N    | 34.57  | 1743.8805 | 14     | 0.9  | 582.3013  | 3 | 31.38 | 39       | F39:1472 | OB5952<br>H3A<br>Ro.raw | 2.9356E5            | 2        | 2                       | 195   | 208 | Methylation(KR)                                                                           | R1:Methylation(KR):67.58                                                                                     | PEAKS PTM |
| N.GIEETIC(+57.02)T(+14.02)ATVKK.N                    | N    | 34.37  | 1462.7701 | 13     | 0.9  | 732.3930  | 2 | 27.73 | 31       | F31:1307 | OB5942<br>H6<br>Ro.raw  | 3.1361E3            | 1        | 1                       | 346   | 358 | Carbamidomethylation                                                                      | C7:Carbamidomethylation:1000.00;T8:Methylation(others):19.16                                                 | PEAKS PTM |
| K.TDSRPSIANLAGENSVIDN(+.98)LPPEEVANSYGLPR.E          | Y    | 34.18  | 3497.7273 | 33     | 4.8  | 1166.9220 | 3 | 37.42 | 37       | F37:1844 | OB5949<br>H3B<br>Ro.raw | 4.9402E4            | 1        | 1                       | 471   | 503 |                                                                                           | N19:Deamidation (NQ):0.00                                                                                    | PEAKS DB  |
| R.WLGLSAEYGN(+.98)LYR.N                              | N    | 33.97  | 1541.7513 | 13     | 5.4  | 771.8871  | 2 | 54.24 | 29       | F29:2679 | OB5922<br>H2<br>Ro.raw  | 0                   | 0        | 0                       | 389   | 401 | Deamidation (NQ)                                                                          | N10:Deamidation (NQ):1000.00                                                                                 | PEAKS DB  |
| total 83 peptides                                    |      |        |           |        |      |           |   |       |          |          |                         |                     |          |                         |       |     |                                                                                           |                                                                                                              |           |

| Peptide                                                | Uniq | -10lgP | Mass      | Length | ppm  | m/z       | z | RT    | Fraction | Scan     | Source File       | Area Roasted in gel | #Feature | #Feature Roasted in gel | Start | End | PTM                                                                 | AScore                                                                        | Found By  |
|--------------------------------------------------------|------|--------|-----------|--------|------|-----------|---|-------|----------|----------|-------------------|---------------------|----------|-------------------------|-------|-----|---------------------------------------------------------------------|-------------------------------------------------------------------------------|-----------|
| G.NGIEETIC(+57.02)TATVKK.N                             | N    | 33.56  | 1562.7974 | 14     | 0.1  | 782.4060  | 2 | 29.85 | 34       | F34:1417 | OB5945 H2 Ro.raw  | 8.2899E3            | 2        | 2                       | 345   | 358 | Carbamidomethylation                                                | C8:Carbamidomethylation:1000.00                                               | PEAKS DB  |
| R.RPFYSNAP(+15.99)QEIFIQGR.G                           | N    | 33.55  | 2066.0332 | 17     | 0.2  | 689.6852  | 3 | 31.94 | 40       | F40:1497 | OB5953 H3A Ro.raw | 4.3282E4            | 1        | 1                       | 82    | 98  | Oxidation or Hydroxylation                                          | P8:Oxidation or Hydroxylation:32.28                                           | PEAKS PTM |
| R.AHVQ(+.98)VVDSNGNRVYDEELQEGHVLVVPQ(+.98)NFAVAGK.S    | N    | 33.38  | 3818.8862 | 35     | 8.9  | 955.7373  | 4 | 33.12 | 31       | F31:1624 | OB5942 H6 Ro.raw  | 3.8034E4            | 1        | 1                       | 424   | 458 |                                                                     | Q4:Deamidation (NQ):8.81;Q28:D eamidation (NQ): 12.28                         | PEAKS DB  |
| R.FNLAGNH(+156.12)QEFLR.Y                              | N    | 33.01  | 1729.8788 | 13     | -7.6 | 577.6292  | 3 | 31.13 | 38       | F38:1444 | OB5951 H3A Ro.raw | 7.0376E5            | 2        | 2                       | 196   | 208 | 4-hydroxynonenal (HNE)                                              | H7:4-hydroxynonenal (HNE):1000.00                                             | PEAKS PTM |
| R.N(+.98)ALFVPHYNTNAHSIIYALR.G                         | N    | 32.68  | 2314.1858 | 20     | 7.3  | 772.4082  | 3 | 50.66 | 29       | F29:2450 | OB5922 H2 Ro.raw  | 1.0573E4            | 1        | 1                       | 402   | 421 |                                                                     | N1:Deamidation (NQ):0.00                                                      | PEAKS DB  |
| R.IESEGYYIETWN(+.98)PNNQEFEC(+57.02)AGVALSR.L          | N    | 32.58  | 3070.3613 | 27     | 6.9  | 1536.1985 | 2 | 34.73 | 32       | F32:1729 | OB5943 H6 Ro.raw  | 2.6575E4            | 1        | 1                       | 46    | 72  | Carbamidomethylation                                                | N12:Deamidation (NQ):0.00;C20:C arbamidomethylation:1000.00                   | PEAKS DB  |
| R.AGQEEENEKGNIFSGFTPEFLAQAFQVDDRQIVQNLR.G              | N    | 32.18  | 4152.9775 | 37     | 5.2  | 1385.3403 | 3 | 39.54 | 38       | F38:1958 | OB5951 H3A Ro.raw | 1.056E5             | 1        | 1                       | 251   | 287 |                                                                     |                                                                               | PEAKS DB  |
| K.T(-18.01)ANELNLLILR.W                                | N    | 31.74  | 1250.7346 | 11     | 2.2  | 626.3760  | 2 | 35.27 | 29       | F29:1600 | OB5922 H2 Ro.raw  | 1.738E4             | 1        | 1                       | 378   | 388 | Dehydration                                                         | T1:Dehydration:1000.00                                                        | PEAKS PTM |
| R.QLKNNNPFKFFVPPSQSPR.A                                | N    | 31.56  | 2372.2388 | 20     | 0.5  | 791.7539  | 3 | 33.17 | 29       | F29:1463 | OB5922 H2 Ro.raw  | 0                   | 0        | 0                       | 508   | 527 |                                                                     |                                                                               | PEAKS DB  |
| R.SPDIYNPQAGSLK(+41.03)TANELNLLILR.W                   | N    | 31.55  | 2680.4548 | 24     | 0.2  | 894.4924  | 3 | 36.03 | 34       | F34:1771 | OB5945 H2 Ro.raw  | 3.6458E4            | 1        | 1                       | 365   | 388 | Amidination of lysines or N-terminal amines with methyl acetimidate | K13:Amidination of lysines or N-terminal amines with methyl acetimidate:54.40 | PEAKS PTM |
| R.WLGLSAE(+21.98)YGNLYR.N                              | N    | 30.00  | 1562.7494 | 13     | -8.4 | 782.3754  | 2 | 35.27 | 29       | F29:1583 | OB5922 H2 Ro.raw  | 5.0047E4            | 2        | 2                       | 389   | 401 | Sodium adduct                                                       | E7:Sodium adduct:42.78                                                        | PEAKS PTM |
| R.LNAQRPDNRIESEGYYIETWNPNN(+.98)QEFEC(+57.02)AGVALSR.L | N    | 29.77  | 4134.9087 | 36     | 4.7  | 1379.3167 | 3 | 33.85 | 33       | F33:1671 | OB5944 H6 Ro.raw  | 8.0788E4            | 1        | 1                       | 37    | 72  | Carbamidomethylation                                                | N24:Deamidation (NQ):0.00;C29:C arbamidomethylation:1000.00                   | PEAKS DB  |
| N.GIEET(+14.02)IC(+57.02)TATVKK.N                      | N    | 29.08  | 1462.7701 | 13     | -1.4 | 732.3914  | 2 | 28.11 | 32       | F32:1329 | OB5943 H6 Ro.raw  | 2.1469E3            | 1        | 1                       | 346   | 358 | Carbamidomethylation                                                | T5:Methylation(others):9.08;C7:Carbamidomethylation:1000.00                   | PEAKS PTM |
| R.W(+15.99)LGLSAEYGNLYR.N                              | N    | 28.45  | 1556.7623 | 13     | -0.8 | 779.3878  | 2 | 34.26 | 31       | F31:1698 | OB5942 H6 Ro.raw  | 3.8864E3            | 1        | 1                       | 389   | 401 | Oxidation (HW)                                                      | W1:Oxidation (HW):1000.00                                                     | PEAKS PTM |
| total 83 peptides                                      |      |        |           |        |      |           |   |       |          |          |                   |                     |          |                         |       |     |                                                                     |                                                                               |           |

| [Protein Coverage](#) | [Supporting Peptides](#) |

Protein Coverage:

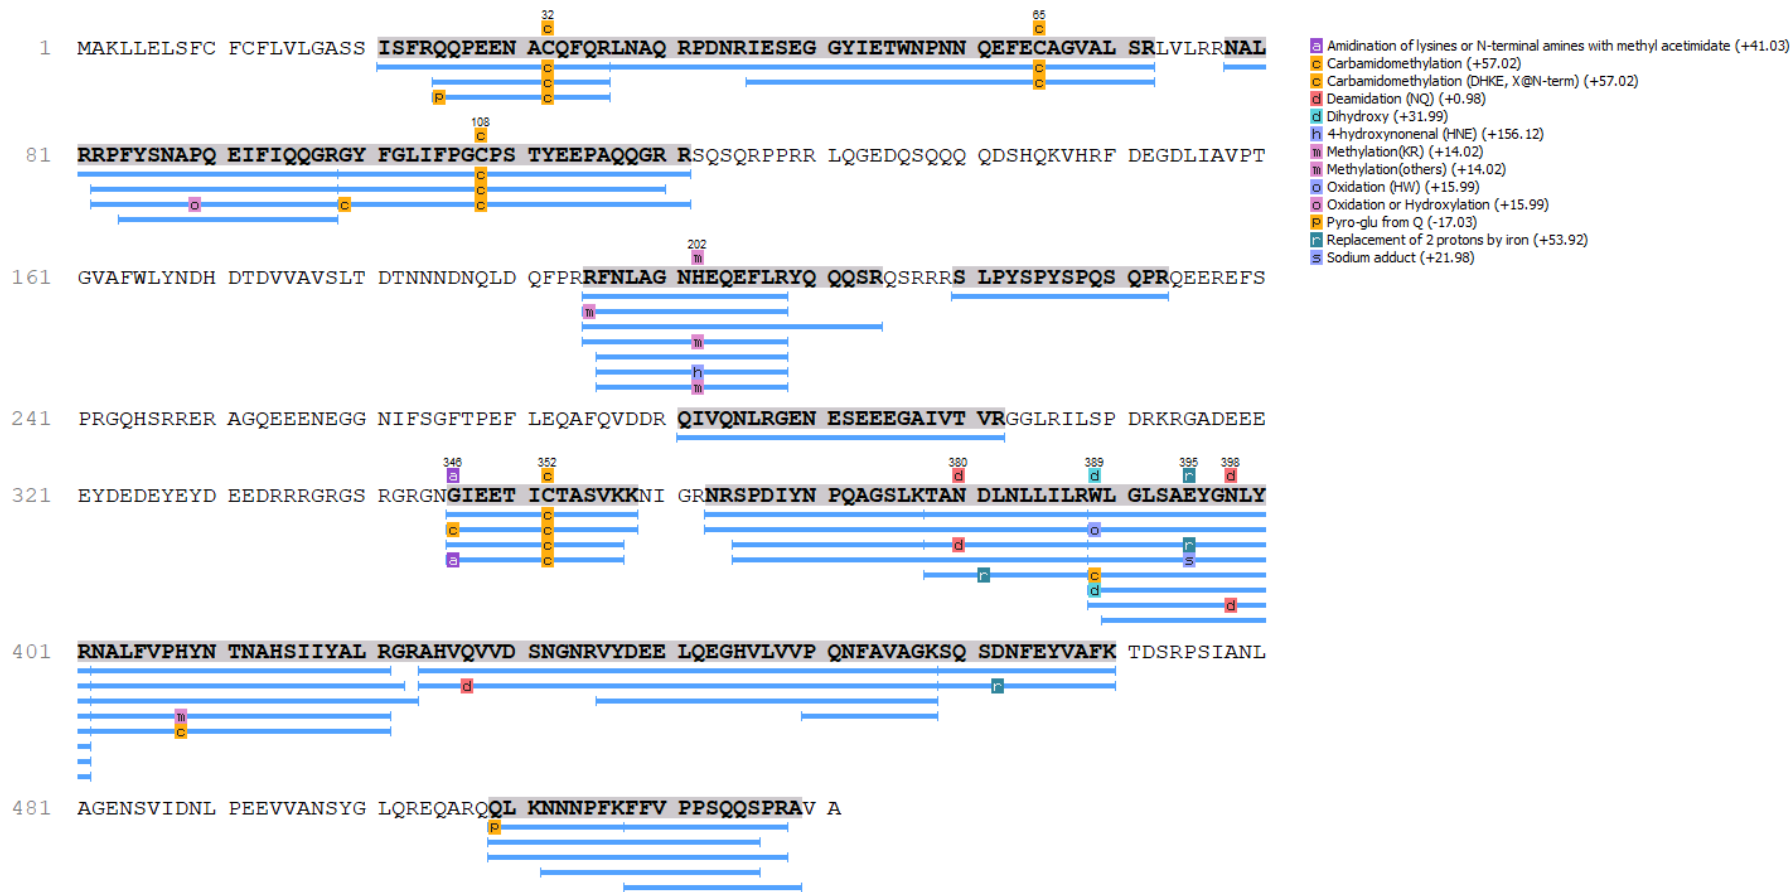

Supporting Peptides:

| Peptide                          | Uniq | -10lgP | Mass      | Length | ppm  | m/z       | z | RT    | Fraction | Scan     | Source File       | Area Roasted in gel | #Feature | #Feature Roasted in gel | Start | End | PTM                  | AScore                           | Found By |
|----------------------------------|------|--------|-----------|--------|------|-----------|---|-------|----------|----------|-------------------|---------------------|----------|-------------------------|-------|-----|----------------------|----------------------------------|----------|
| R.SPDIYNPQAGSLKTANDLNLLILR.W     | N    | 136.50 | 2625.4126 | 24     | -0.1 | 876.1447  | 3 | 35.61 | 29       | F29:1607 | OB5922 H2 Ro.raw  | 1.276E6             | 3        | 3                       | 365   | 388 |                      |                                  | PEAKS DB |
| R.NALFVPHYNTNAHSIIYALR.G         | N    | 134.27 | 2313.2019 | 20     | 3.7  | 1157.6125 | 2 | 33.79 | 29       | F29:1486 | OB5922 H2 Ro.raw  | 5.1511E7            | 23       | 23                      | 402   | 421 |                      |                                  | PEAKS DB |
| R.GYGLIFPGC(+57.02)PSTYEPAQQGR.R | N    | 127.83 | 2473.1372 | 22     | 3.0  | 1237.5796 | 2 | 36.11 | 38       | F38:1750 | OB5951 H3A Ro.raw | 2.5988E6            | 9        | 9                       | 99    | 120 | Carbamidomethylation | C10:Carbamidomethylation:1000.00 | PEAKS DB |
| R.WGLSAEYGNLYR.N                 | N    | 121.81 | 1540.7673 | 13     | 2.8  | 771.3931  | 2 | 34.72 | 34       | F34:1730 | OB5945 H2 Ro.raw  | 5.9147E7            | 35       | 35                      | 389   | 401 |                      |                                  | PEAKS DB |
| R.NRSPDIYNPQAGSLKTANDLNLLILR.W   | N    | 120.82 | 2895.5566 | 26     | 1.6  | 966.1943  | 3 | 34.35 | 29       | F29:1530 | OB5922 H2 Ro.raw  | 2.2791E6            | 6        | 6                       | 363   | 388 |                      |                                  | PEAKS DB |
| K.SQSDNFEYVAFK.T                 | N    | 114.21 | 1433.6462 | 12     | 2.6  | 717.8323  | 2 | 31.76 | 35       | F35:1518 | OB5946 H2 Ro.raw  | 5.4437E6            | 6        | 6                       | 459   | 470 |                      |                                  | PEAKS DB |
| R.RPFYSNAPQEIFIQQGR.G            | N    | 110.90 | 2050.0383 | 17     | 3.2  | 684.3556  | 3 | 31.52 | 38       | F38:1483 | OB5951 H3A Ro.raw | 9.1631E6            | 15       | 15                      | 82    | 98  |                      |                                  | PEAKS DB |
| total 73 peptides                |      |        |           |        |      |           |   |       |          |          |                   |                     |          |                         |       |     |                      |                                  |          |

| Peptide                                          | Uniq | -10lgP | Mass      | Length | ppm  | m/z       | z | RT    | Fraction | Scan     | Source File             | Area Roasted in gel | #Feature | #Feature Roasted in gel | Start | End | PTM                                      | AScore                                                                | Found By     |
|--------------------------------------------------|------|--------|-----------|--------|------|-----------|---|-------|----------|----------|-------------------------|---------------------|----------|-------------------------|-------|-----|------------------------------------------|-----------------------------------------------------------------------|--------------|
| R.NALRRPFYSNAPQEIFIQQGR.G                        | N    | 97.93  | 2504.3037 | 21     | 1.0  | 835.7760  | 3 | 32.71 | 40       | F40:1535 | OB5953<br>H3A<br>Ro.raw | 6.3111E6            | 14       | 13                      | 78    | 98  |                                          |                                                                       | PEAKS<br>DB  |
| R.NRSPDIYNPQAGSLK.T                              | N    | 96.54  | 1658.8376 | 15     | 0.1  | 830.4261  | 2 | 27.65 | 32       | F32:1291 | OB5943<br>H6<br>Ro.raw  | 8.0621E5            | 12       | 12                      | 363   | 377 |                                          |                                                                       | PEAKS<br>DB  |
| R.SPDIYNPQAGSLK.T                                | N    | 92.16  | 1388.6936 | 13     | 1.7  | 695.3552  | 2 | 28.58 | 34       | F34:1323 | OB5945<br>H2<br>Ro.raw  | 1.33E6              | 6        | 6                       | 365   | 377 |                                          |                                                                       | PEAKS<br>DB  |
| R.FNLAGNHEQEFLR.Y                                | N    | 91.88  | 1573.7637 | 13     | 4.3  | 787.8925  | 2 | 30.57 | 38       | F38:1440 | OB5951<br>H3A<br>Ro.raw | 1.243E5             | 7        | 7                       | 196   | 208 |                                          |                                                                       | PEAKS<br>DB  |
| R.VYDEELQEGHVLVVPQNFAVAGK.S                      | N    | 90.91  | 2540.2910 | 23     | 1.4  | 847.7721  | 3 | 33.42 | 29       | F29:1478 | OB5922<br>H2<br>Ro.raw  | 1.9062E6            | 10       | 10                      | 436   | 458 |                                          |                                                                       | PEAKS<br>DB  |
| N.GIEETIC(+57.02)TASVK.K                         | N    | 90.29  | 1306.6438 | 12     | 0.6  | 654.3296  | 2 | 28.94 | 34       | F34:1356 | OB5945<br>H2<br>Ro.raw  | 1.977E5             | 6        | 6                       | 346   | 357 | Carbamidomethylation                     | C7:Carbamidomet<br>hylation:1000.00                                   | PEAKS<br>DB  |
| R.RFNLAGNHEQEFLR.Y                               | N    | 87.38  | 1729.8647 | 14     | 1.5  | 577.6297  | 3 | 31.36 | 40       | F40:1478 | OB5953<br>H3A<br>Ro.raw | 1.8294E6            | 7        | 7                       | 195   | 208 |                                          |                                                                       | PEAKS<br>DB  |
| R.NALFVPH(+14.02)YNTNAHSIIYALR.G                 | N    | 79.80  | 2327.2175 | 20     | 0.7  | 776.7470  | 3 | 34.91 | 29       | F29:1561 | OB5922<br>H2<br>Ro.raw  | 1.3103E6            | 3        | 3                       | 402   | 421 | Methylation(others)                      | H7:Methylation(ot<br>hers):22.45                                      | PEAKS<br>PTM |
| R.AHVQVDSNGNRVYDEELQEGHVLVVPQNFAVAGK.S           | N    | 77.75  | 3816.9182 | 35     | 3.6  | 955.2402  | 4 | 32.32 | 35       | F35:1544 | OB5946<br>H2<br>Ro.raw  | 8.2893E6            | 8        | 8                       | 424   | 458 |                                          |                                                                       | PEAKS<br>DB  |
| R.GYGLIFPGC(+57.02)PSTYEPAQQGRR.S                | N    | 76.83  | 2629.2383 | 23     | 2.4  | 877.4221  | 3 | 35.18 | 40       | F40:1676 | OB5953<br>H3A<br>Ro.raw | 5.6622E6            | 9        | 9                       | 99    | 121 | Carbamidomethylation                     | C10:Carbamidom<br>ethylation:1000.0<br>0                              | PEAKS<br>DB  |
| N.GIEETIC(+57.02)TASVKK.N                        | N    | 76.18  | 1434.7388 | 13     | 0.7  | 718.3771  | 2 | 26.91 | 33       | F33:1250 | OB5944<br>H6<br>Ro.raw  | 3.5109E5            | 8        | 8                       | 346   | 358 | Carbamidomethylation                     | C7:Carbamidomet<br>hylation:1000.00                                   | PEAKS<br>DB  |
| R.Q(-17.03)QPEENAC(+57.02)QFQR.L                 | N    | 75.52  | 1516.6365 | 12     | 2.5  | 759.3274  | 2 | 28.03 | 32       | F32:1319 | OB5943<br>H6<br>Ro.raw  | 7.279E3             | 2        | 2                       | 25    | 36  | Pyro-glu from Q;<br>Carbamidomethylation | Q1:Pyro-glu from<br>Q:1000.00;C8:Ca<br>rbamidomethylati<br>on:1000.00 | PEAKS<br>PTM |
| V.PQNFAVAGK.S                                    | N    | 75.51  | 930.4923  | 9      | 1.0  | 466.2539  | 2 | 32.32 | 35       | F35:1542 | OB5946<br>H2<br>Ro.raw  | 3.3444E6            | 3        | 3                       | 450   | 458 |                                          |                                                                       | PEAKS<br>DB  |
| R.IESEGGYIETWNPNNQEFEC(+57.02)AGVALSR.L          | N    | 74.31  | 3069.3774 | 27     | 1.4  | 1024.1345 | 3 | 34.50 | 31       | F31:1703 | OB5942<br>H6<br>Ro.raw  | 1.0361E4            | 1        | 1                       | 46    | 72  | Carbamidomethylation                     | C20:Carbamidom<br>ethylation:1000.0<br>0                              | PEAKS<br>DB  |
| K.TANDLNLLILR.W                                  | N    | 73.94  | 1254.7296 | 11     | 1.8  | 628.3732  | 2 | 34.79 | 35       | F35:1750 | OB5946<br>H2<br>Ro.raw  | 1.0437E7            | 10       | 10                      | 378   | 388 |                                          |                                                                       | PEAKS<br>DB  |
| R.QQPEENAC(+57.02)QFQR.L                         | N    | 73.76  | 1533.6630 | 12     | 1.7  | 767.8400  | 2 | 25.24 | 32       | F32:1157 | OB5943<br>H6<br>Ro.raw  | 3.7544E4            | 3        | 3                       | 25    | 36  | Carbamidomethylation                     | C8:Carbamidomet<br>hylation:1000.00                                   | PEAKS<br>DB  |
| K.FFVPPSQQSPR.A                                  | N    | 69.38  | 1288.6564 | 11     | 0.2  | 645.3356  | 2 | 28.58 | 32       | F32:1346 | OB5943<br>H6<br>Ro.raw  | 2.1108E5            | 5        | 5                       | 518   | 528 |                                          |                                                                       | PEAKS<br>DB  |
| R.S(+57.02)PDIYNPQAGSLKTANDLNLLILR.W             | N    | 64.15  | 2682.4341 | 24     | 1.5  | 895.1533  | 3 | 35.28 | 34       | F34:1735 | OB5945<br>H2<br>Ro.raw  | 9.5441E4            | 1        | 1                       | 365   | 388 |                                          | S1:Carbamidomet<br>hylation (DHKE, X<br>@N-term):14.04                | PEAKS<br>PTM |
| R.AHVQVVDSDN(+.98)GNRVYDEELQEGHVLVVPQNFAVAGK.S   | N    | 64.02  | 3817.9023 | 35     | 5.0  | 955.4877  | 4 | 33.04 | 29       | F29:1438 | OB5922<br>H2<br>Ro.raw  | 1.4175E6            | 2        | 2                       | 424   | 458 |                                          | N9:Deamidation<br>(NQ):9.40                                           | PEAKS<br>DB  |
| R.NALFVPH(+57.02)YNTNAHSIIYALR.G                 | N    | 63.66  | 2370.2231 | 20     | 0.1  | 791.0817  | 3 | 34.03 | 35       | F35:1631 | OB5946<br>H2<br>Ro.raw  | 8.9747E5            | 1        | 1                       | 402   | 421 | Carbamidomethylation<br>(DHKE, X@N-term) | H7:Carbamidomet<br>hylation (DHKE, X<br>@N-term):20.35                | PEAKS<br>PTM |
| R.RFNLAGNHEQEFLRYQQQSR.Q                         | N    | 62.22  | 2520.2371 | 20     | -2.3 | 631.0667  | 4 | 34.12 | 30       | F30:1496 | OB5926<br>H3B<br>Ro.raw | 7.5688E4            | 2        | 2                       | 195   | 214 |                                          |                                                                       | PEAKS<br>DB  |
| R.LNAQRPDNRIESEGGYIETWNPNNQEFEC(+57.02)AGVALSR.L | N    | 60.14  | 4133.9248 | 36     | 2.4  | 1034.4910 | 4 | 33.87 | 33       | F33:1670 | OB5944<br>H6<br>Ro.raw  | 1.5556E6            | 3        | 3                       | 37    | 72  | Carbamidomethylation                     | C29:Carbamidom<br>ethylation:1000.0<br>0                              | PEAKS<br>DB  |
| total 73 peptides                                |      |        |           |        |      |           |   |       |          |          |                         |                     |          |                         |       |     |                                          |                                                                       |              |



| Peptide                                       | Uniq | -10lgP | Mass      | Length | ppm  | m/z       | z | RT    | Fraction | Scan     | Source File      | Area Roasted in gel | #Feature | #Feature Roasted in gel | Start | End | PTM                                                                                     | AScore                                                                                                     | Found By  |
|-----------------------------------------------|------|--------|-----------|--------|------|-----------|---|-------|----------|----------|------------------|---------------------|----------|-------------------------|-------|-----|-----------------------------------------------------------------------------------------|------------------------------------------------------------------------------------------------------------|-----------|
| R.GYGLIFPGC(+57.02)PS(+14.02)YEEPAQQGR.R      | N    | 59.71  | 2487.1528 | 22     | 2.2  | 1244.5864 | 2 | 36.43 | 32       | F32:1817 | OB5943 H6 Ro.raw | 7.7963E4            | 3        | 3                       | 99    | 120 | Carbamidomethylation                                                                    | C10:Carbamidomethylation:1000.00;S12:Methylation(others):9.34                                              | PEAKS PTM |
| R.W(+31.99)LGLSAEYGNLYR.N                     | N    | 59.45  | 1572.7572 | 13     | -1.6 | 787.3846  | 2 | 33.64 | 35       | F35:1624 | OB5946 H2 Ro.raw | 8.5976E4            | 2        | 2                       | 389   | 401 | Dihydroxy                                                                               | W1:Dihydroxy:62.93                                                                                         | PEAKS PTM |
| P.FYSNAPQEIFIQQGR.G                           | N    | 59.30  | 1796.8845 | 15     | -1.2 | 899.4484  | 2 | 32.27 | 31       | F31:1574 | OB5942 H6 Ro.raw | 0                   | 0        | 0                       | 84    | 98  |                                                                                         |                                                                                                            | PEAKS DB  |
| R.GYGLIFPGC(+57.02)PST(+14.02)YEEPAQQGR.R     | N    | 58.14  | 2487.1528 | 22     | 2.8  | 1244.5872 | 2 | 36.17 | 31       | F31:1801 | OB5942 H6 Ro.raw | 2.5405E4            | 2        | 2                       | 99    | 120 | Carbamidomethylation                                                                    | C10:Carbamidomethylation:1000.00;T13:Methylation(others):14.02                                             | PEAKS PTM |
| R.W(+57.02)LGLSAEYGNLYR.N                     | N    | 57.46  | 1597.7888 | 13     | 0.6  | 799.9022  | 2 | 35.09 | 34       | F34:1725 | OB5945 H2 Ro.raw | 1.848E4             | 1        | 1                       | 389   | 401 | Carbamidomethylation (DHKE, X@N-term)                                                   | W1:Carbamidomethylation (DHKE, X@N-term):62.19                                                             | PEAKS PTM |
| Q.Q(-17.03)LKNNNPFK.F                         | N    | 56.41  | 1084.5665 | 9      | 1.6  | 543.2914  | 2 | 28.75 | 34       | F34:1346 | OB5945 H2 Ro.raw | 1.0606E4            | 2        | 2                       | 509   | 517 | Pyro-glu from Q                                                                         | Q1:Pyro-glu from Q:1000.00                                                                                 | PEAKS PTM |
| R.AHVQVVDNNGN(+.98)RVYDEELQEGHVLVVPQNFAVAGK.S | N    | 54.09  | 3817.9023 | 35     | 3.2  | 955.4859  | 4 | 32.51 | 34       | F34:1567 | OB5945 H2 Ro.raw | 7.3088E4            | 3        | 3                       | 424   | 458 |                                                                                         | N11:Deamidation (NQ):8.22                                                                                  | PEAKS DB  |
| R.IESEGGYIETWNPNNQ(+.98)EFEC(+57.02)AGVALSR.L | N    | 52.73  | 3070.3613 | 27     | 6.0  | 1024.4672 | 3 | 34.92 | 32       | F32:1736 | OB5943 H6 Ro.raw | 6.6817E3            | 1        | 1                       | 46    | 72  | Carbamidomethylation                                                                    | Q16:Deamidation (NQ):0.00;C20:Carbamidomethylation:1000.00                                                 | PEAKS DB  |
| K.FFVPPSQQSRA.V                               | N    | 51.84  | 1359.6935 | 12     | 1.1  | 680.8547  | 2 | 29.14 | 32       | F32:1381 | OB5943 H6 Ro.raw | 3.8841E4            | 2        | 2                       | 518   | 529 |                                                                                         |                                                                                                            | PEAKS DB  |
| R.VYDEELQEGHVLVVPQN(+.98)FAVAGK.S             | N    | 51.23  | 2541.2751 | 23     | 9.5  | 1271.6569 | 2 | 32.92 | 31       | F31:1618 | OB5942 H6 Ro.raw | 3.629E3             | 1        | 1                       | 436   | 458 |                                                                                         | N17:Deamidation (NQ):14.02                                                                                 | PEAKS DB  |
| K.TAN(+.98)DLNLLILR.W                         | N    | 50.73  | 1255.7136 | 11     | 2.6  | 628.8657  | 2 | 35.22 | 31       | F31:1745 | OB5942 H6 Ro.raw | 0                   | 0        | 0                       | 378   | 388 | Deamidation (NQ)                                                                        | N3:Deamidation (NQ):68.31                                                                                  | PEAKS DB  |
| R.S(+57.02)PDIYNPQAGSLK.T                     | N    | 50.29  | 1445.7150 | 13     | 5.7  | 723.8689  | 2 | 28.94 | 34       | F34:1350 | OB5945 H2 Ro.raw | 6.4489E3            | 2        | 2                       | 365   | 377 |                                                                                         | S1:Carbamidomethylation (DHKE, X@N-term):14.04                                                             | PEAKS PTM |
| R.N(+57.02)ALFVPHYNTNAHSIIYALR.G              | N    | 48.76  | 2370.2231 | 20     | -0.1 | 791.0816  | 3 | 34.53 | 29       | F29:1557 | OB5922 H2 Ro.raw | 3.2966E6            | 1        | 1                       | 402   | 421 |                                                                                         | N1:Carbamidomethylation (DHKE, X@N-term):10.82                                                             | PEAKS PTM |
| R.WLGLSAE(+53.92)YGNLYR.N                     | N    | 48.21  | 1594.6866 | 13     | 0.4  | 532.5697  | 3 | 35.09 | 29       | F29:1579 | OB5922 H2 Ro.raw | 6.0447E5            | 3        | 3                       | 389   | 401 | Replacement of 2 protons by iron                                                        | E7:Replacement of 2 protons by iron:123.05                                                                 | PEAKS PTM |
| N.G(+41.03)IETIC(+57.02)TASVK.K               | N    | 48.20  | 1347.6704 | 12     | 0.3  | 674.8427  | 2 | 29.12 | 34       | F34:1370 | OB5945 H2 Ro.raw | 1.5496E4            | 1        | 1                       | 346   | 357 | Amidation of lysines or N-terminal amines with methyl acetimidate; Carbamidomethylation | G1:Amidation of lysines or N-terminal amines with methyl acetimidate:96.48;C7:Carbamidomethylation:1000.00 | PEAKS PTM |
| R.SPD(+57.02)IYNPQAGSLK.T                     | N    | 45.16  | 1445.7150 | 13     | 2.2  | 723.8663  | 2 | 29.51 | 29       | F29:1244 | OB5922 H2 Ro.raw | 0                   | 0        | 0                       | 365   | 377 |                                                                                         | D3:Carbamidomethylation (DHKE, X@N-term):0.00                                                              | PEAKS PTM |
| R.NALFVPHYNTNAHSIIYALRG.R                     | N    | 44.84  | 2370.2231 | 21     | 1.2  | 791.0826  | 3 | 33.77 | 34       | F34:1624 | OB5945 H2 Ro.raw | 4.2894E6            | 2        | 2                       | 402   | 422 |                                                                                         |                                                                                                            | PEAKS DB  |
| Q.QLKNNNPFKFFVPPSQQS.P                        | N    | 42.33  | 2119.0850 | 18     | 1.9  | 707.3703  | 3 | 33.27 | 35       | F35:1604 | OB5946 H2 Ro.raw | 6.7737E4            | 1        | 1                       | 509   | 526 |                                                                                         |                                                                                                            | PEAKS DB  |
| K.NNNPFKFFVPPSQQS.P                           | N    | 41.33  | 1749.8474 | 15     | 1.0  | 875.9319  | 2 | 34.91 | 29       | F29:1573 | OB5922 H2 Ro.raw | 4.7342E4            | 1        | 1                       | 512   | 526 |                                                                                         |                                                                                                            | PEAKS DB  |
| N.G(+57.02)IETIC(+57.02)TASVKK.N              | N    | 41.05  | 1491.7603 | 13     | 8.7  | 746.8939  | 2 | 26.96 | 31       | F31:1261 | OB5942 H6 Ro.raw | 3.2429E4            | 4        | 4                       | 346   | 358 | Carbamidomethylation (DHKE, X@N-term); Carbamidomethylation                             | G1:Carbamidomethylation (DHKE, X@N-term):32.28; C7:Carbamidomethylation:1000.00                            | PEAKS PTM |
| total 73 peptides                             |      |        |           |        |      |           |   |       |          |          |                  |                     |          |                         |       |     |                                                                                         |                                                                                                            |           |

| Peptide                                              | Uniq | -10lgP | Mass      | Length | ppm  | m/z       | z | RT    | Fraction | Scan     | Source File       | Area Roasted in gel | #Feature | #Feature Roasted in gel | Start | End | PTM                                                         | AScore                                                                           | Found By  |
|------------------------------------------------------|------|--------|-----------|--------|------|-----------|---|-------|----------|----------|-------------------|---------------------|----------|-------------------------|-------|-----|-------------------------------------------------------------|----------------------------------------------------------------------------------|-----------|
| R.FNLAGNH(+14.02)EQEFLR.Y                            | N    | 40.38  | 1587.7793 | 13     | 0.7  | 530.2674  | 3 | 30.81 | 39       | F39:1450 | OB5952 H3A Ro.raw | 1.3642E5            | 3        | 3                       | 196   | 208 | Methylation(others)                                         | H7:Methylation(others):33.98                                                     | PEAKS PTM |
| K.SQSD(+53.92)NFEYVAFK.T                             | N    | 40.31  | 1487.5656 | 12     | -2.8 | 744.7880  | 2 | 32.03 | 29       | F29:1395 | OB5922 H2 Ro.raw  | 0                   | 0        | 0                       | 459   | 470 | Replacement of 2 protons by iron                            | D4:Replacement of 2 protons by iron:20.50                                        | PEAKS PTM |
| R.AHVQVVDSDNGNRVYDEELQ(+.98)EGHVLVVPQNFAVAGK.S       | N    | 40.20  | 3817.9023 | 35     | 7.9  | 955.4904  | 4 | 33.43 | 35       | F35:1615 | OB5946 H2 Ro.raw  | 0                   | 0        | 0                       | 424   | 458 |                                                             | Q19:Deamidation (NQ):4.91                                                        | PEAKS DB  |
| R.AHVQVVDSDN(+.98)GN(+.98)RVYDEELQEGHVLVVPQNFAVAGK.S | N    | 39.19  | 3818.8862 | 35     | 8.6  | 955.7371  | 4 | 34.33 | 32       | F32:1692 | OB5943 H6 Ro.raw  | 0                   | 0        | 0                       | 424   | 458 |                                                             | N9:Deamidation (NQ):0.00;N11:Deamidation (NQ):0.00                               | PEAKS DB  |
| K.TAND(+53.92)LNLLILR.W                              | N    | 38.76  | 1308.6488 | 11     | 0.2  | 655.3318  | 2 | 35.09 | 29       | F29:1584 | OB5922 H2 Ro.raw  | 8.7715E4            | 1        | 1                       | 378   | 388 | Replacement of 2 protons by iron                            | D4:Replacement of 2 protons by iron:55.73                                        | PEAKS PTM |
| R.RFNLAGNH(+14.02)EQEFLR.Y                           | N    | 38.64  | 1743.8805 | 14     | 0.5  | 582.3011  | 3 | 31.14 | 38       | F38:1453 | OB5951 H3A Ro.raw | 7.3646E5            | 3        | 3                       | 195   | 208 | Methylation(others)                                         | H8:Methylation(others):40.00                                                     | PEAKS PTM |
| R.AHVQ(+.98)VVDSDNGNRVYDEELQEGHVLVVPQNFAVAGK.S       | N    | 38.57  | 3817.9023 | 35     | 0.9  | 955.4838  | 4 | 33.12 | 31       | F31:1624 | OB5942 H6 Ro.raw  | 4.5408E4            | 1        | 1                       | 424   | 458 | Deamidation (NQ)                                            | Q4:Deamidation (NQ):21.59                                                        | PEAKS DB  |
| W.LGLSAEYGNLYR.N                                     | N    | 38.37  | 1354.6881 | 12     | 3.5  | 678.3537  | 2 | 31.68 | 31       | F31:1539 | OB5942 H6 Ro.raw  | 0                   | 0        | 0                       | 390   | 401 |                                                             |                                                                                  | PEAKS DB  |
| S.ISFRQQPEENAC(+57.02)QFQR.L                         | N    | 37.74  | 2036.9486 | 16     | 0.8  | 679.9907  | 3 | 28.84 | 36       | F36:1329 | OB5948 H3B Ro.raw | 3.1194E4            | 4        | 4                       | 21    | 36  | Carbamidomethylation                                        | C12:Carbamidomethylation:1000.00                                                 | PEAKS DB  |
| R.G(+57.02)YFGLIFPGC(+57.02)PSTYEPAQQGRR.S           | N    | 37.54  | 2686.2598 | 23     | 1.6  | 896.4286  | 3 | 35.57 | 39       | F39:1718 | OB5952 H3A Ro.raw | 5.4933E4            | 1        | 1                       | 99    | 121 | Carbamidomethylation (DHKE, X@N-term); Carbamidomethylation | G1:Carbamidomethylation (DHKE, X@N-term):130.55;C10:Carbamidomethylation:1000.00 | PEAKS PTM |
| R.SLPSPSPSP(+31.99)QSQPR.Q                           | N    | 36.19  | 1637.7686 | 14     | 3.2  | 819.8942  | 2 | 27.07 | 38       | F38:1250 | OB5951 H3A Ro.raw | 6.6096E3            | 1        | 1                       | 220   | 233 |                                                             | P9:Dihydroxy:9.42                                                                | PEAKS PTM |
| R.NALFVPHYNTNAHSIIYALRGR.A                           | N    | 36.04  | 2526.3245 | 22     | 0.6  | 843.1160  | 3 | 33.60 | 29       | F29:1492 | OB5922 H2 Ro.raw  | 7.6168E5            | 2        | 2                       | 402   | 423 |                                                             |                                                                                  | PEAKS DB  |
| R.R(+14.02)FNLAGNHEQEFLR.Y                           | N    | 34.57  | 1743.8805 | 14     | 0.9  | 582.3013  | 3 | 31.38 | 39       | F39:1472 | OB5952 H3A Ro.raw | 2.9356E5            | 2        | 2                       | 195   | 208 | Methylation(KR)                                             | R1:Methylation(KR):67.58                                                         | PEAKS PTM |
| R.WLGLSAEYGN(+.98)LYR.N                              | N    | 33.97  | 1541.7513 | 13     | 5.4  | 771.8871  | 2 | 54.24 | 29       | F29:2679 | OB5922 H2 Ro.raw  | 0                   | 0        | 0                       | 389   | 401 | Deamidation (NQ)                                            | N10:Deamidation (NQ):1000.00                                                     | PEAKS DB  |
| R.RPFYSNAP(+15.99)QEIFIQGR.G                         | N    | 33.55  | 2066.0332 | 17     | 0.2  | 689.6852  | 3 | 31.94 | 40       | F40:1497 | OB5953 H3A Ro.raw | 4.3282E4            | 1        | 1                       | 82    | 98  | Oxidation or Hydroxylation                                  | P8:Oxidation or Hydroxylation:32.28                                              | PEAKS PTM |
| R.AHVQ(+.98)VVDSDNGNRVYDEELQEGHVLVVPQ(+.98)NFAVAGK.S | N    | 33.38  | 3818.8862 | 35     | 8.9  | 955.7373  | 4 | 33.12 | 31       | F31:1624 | OB5942 H6 Ro.raw  | 3.8034E4            | 1        | 1                       | 424   | 458 |                                                             | Q4:Deamidation (NQ):8.81;Q28:Deamidation (NQ):12.28                              | PEAKS DB  |
| R.FNLAGNH(+156.12)EQEFLR.Y                           | N    | 33.01  | 1729.8788 | 13     | -7.6 | 577.6292  | 3 | 31.13 | 38       | F38:1444 | OB5951 H3A Ro.raw | 7.0376E5            | 2        | 2                       | 196   | 208 | 4-hydroxynonenal (HNE)                                      | H7:4-hydroxynonenal (HNE):1000.00                                                | PEAKS PTM |
| R.N(+.98)ALFVPHYNTNAHSIIYALR.G                       | N    | 32.68  | 2314.1858 | 20     | 7.3  | 772.4082  | 3 | 50.66 | 29       | F29:2450 | OB5922 H2 Ro.raw  | 1.0573E4            | 1        | 1                       | 402   | 421 |                                                             | N1:Deamidation (NQ):0.00                                                         | PEAKS DB  |
| R.IESEGYYIETWN(+.98)PNNQEFEC(+57.02)AGVALSR.L        | N    | 32.58  | 3070.3613 | 27     | 6.9  | 1536.1985 | 2 | 34.73 | 32       | F32:1729 | OB5943 H6 Ro.raw  | 2.6575E4            | 1        | 1                       | 46    | 72  | Carbamidomethylation                                        | N12:Deamidation (NQ):0.00;C20:Carbamidomethylation:1000.00                       | PEAKS DB  |
| R.QIVQNLRGENESEEEGAIVTVR.G                           | Y    | 31.60  | 2469.2458 | 22     | 7.0  | 824.0950  | 3 | 30.09 | 38       | F38:1410 | OB5951 H3A Ro.raw | 0                   | 0        | 0                       | 281   | 302 |                                                             |                                                                                  | PEAKS DB  |
| Q.QLKNNNPFKFFVPPSQSPR.A                              | N    | 31.56  | 2372.2388 | 20     | 0.5  | 791.7539  | 3 | 33.17 | 29       | F29:1463 | OB5922 H2 Ro.raw  | 0                   | 0        | 0                       | 509   | 528 |                                                             |                                                                                  | PEAKS DB  |
| total 73 peptides                                    |      |        |           |        |      |           |   |       |          |          |                   |                     |          |                         |       |     |                                                             |                                                                                  |           |

| Peptide                                                | Uniq | -10lgP | Mass      | Length | ppm  | m/z       | z | RT    | Fraction | Scan     | Source File      | Area Roasted in gel | #Feature | #Feature Roasted in gel | Start | End | PTM                  | AScore                                                     | Found By  |
|--------------------------------------------------------|------|--------|-----------|--------|------|-----------|---|-------|----------|----------|------------------|---------------------|----------|-------------------------|-------|-----|----------------------|------------------------------------------------------------|-----------|
| R.WLGLSAE(+21.98)YGNLYR.N                              | N    | 30.00  | 1562.7494 | 13     | -8.4 | 782.3754  | 2 | 35.27 | 29       | F29:1583 | OB5922 H2 Ro.raw | 5.0047E4            | 2        | 2                       | 389   | 401 | Sodium adduct        | E7:Sodium adduct:42.78                                     | PEAKS PTM |
| R.LNAQRPDNRIESEGGYIETWNPNN(+.98)QEPEC(+57.02)AGVALSR.L | N    | 29.77  | 4134.9087 | 36     | 4.7  | 1379.3167 | 3 | 33.85 | 33       | F33:1671 | OB5944 H6 Ro.raw | 8.0788E4            | 1        | 1                       | 37    | 72  | Carbamidomethylation | N24:Deamidation (NQ):0.00;C29:Carbamidomethylation:1000.00 | PEAKS DB  |
| R.W(+15.99)LGLSAEYGNLYR.N                              | N    | 28.45  | 1556.7623 | 13     | -0.8 | 779.3878  | 2 | 34.26 | 31       | F31:1698 | OB5942 H6 Ro.raw | 3.8864E3            | 1        | 1                       | 389   | 401 | Oxidation (HW)       | W1:Oxidation (HW):1000.00                                  | PEAKS PTM |
| total 73 peptides                                      |      |        |           |        |      |           |   |       |          |          |                  |                     |          |                         |       |     |                      |                                                            |           |

Q6IWG5|Q6IWG5\_ARAHY

back to list

| Protein Coverage | Supporting Peptides |

Protein Coverage:

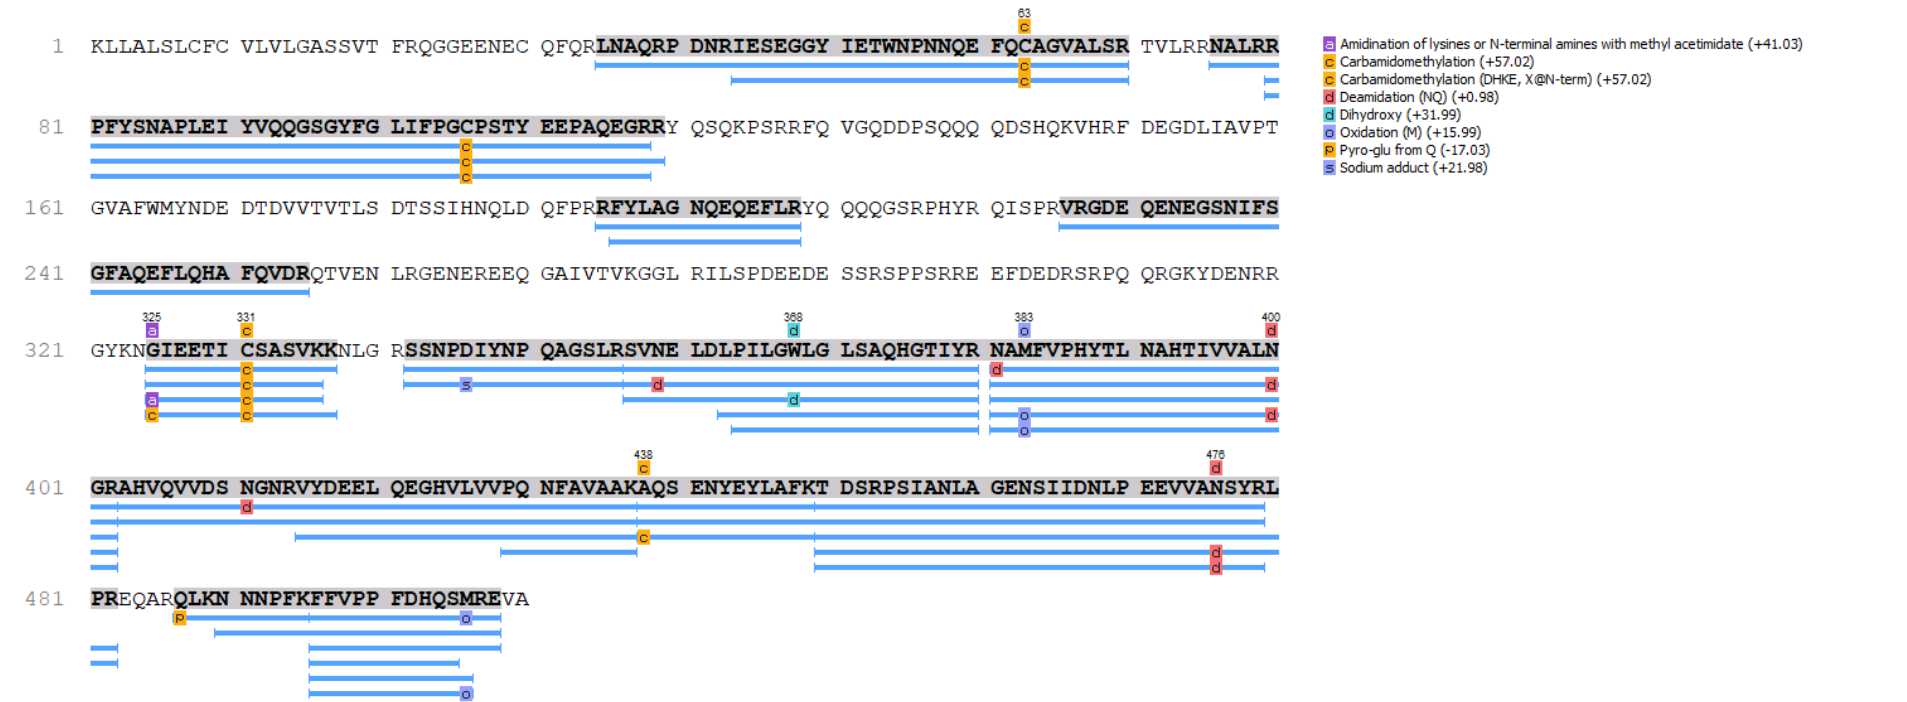

Supporting Peptides:

| Peptide                          | Uniq | -10lgP | Mass      | Length | ppm | m/z       | z | RT    | Fraction | Scan     | Source File      | Area Roasted in gel | #Feature | #Feature Roasted in gel | Start | End | PTM              | AScore                      | Found By |
|----------------------------------|------|--------|-----------|--------|-----|-----------|---|-------|----------|----------|------------------|---------------------|----------|-------------------------|-------|-----|------------------|-----------------------------|----------|
| R.NAMFVPHYTLNAHTIVVALN(+.98)GR.A | Y    | 152.35 | 2438.2529 | 22     | 3.0 | 1220.1375 | 2 | 33.96 | 34       | F34:1643 | OB5945 H2 Ro.raw | 9.2221E6            | 5        | 5                       | 381   | 402 | Deamidation (NQ) | N20:Deamidation (NQ):180.29 | PEAKS DB |
| R.NAMFVPHYTLNAHTIVVALNGR.A       | Y    | 141.80 | 2437.2688 | 22     | 3.5 | 1219.6460 | 2 | 34.54 | 34       | F34:1687 | OB5945 H2 Ro.raw | 7.7824E6            | 7        | 7                       | 381   | 402 |                  |                             | PEAKS DB |
| R.SVNELDLPILGWLGLSAQHGTIYR.N     | Y    | 132.10 | 2651.4070 | 24     | 3.8 | 1326.7158 | 2 | 39.91 | 35       | F35:1991 | OB5946 H2 Ro.raw | 6.4841E7            | 30       | 30                      | 357   | 380 |                  |                             | PEAKS DB |
| total 54 peptides                |      |        |           |        |     |           |   |       |          |          |                  |                     |          |                         |       |     |                  |                             |          |

| Peptide                                          | Uniq | -10lgP | Mass      | Length | ppm  | m/z       | z | RT    | Fraction | Scan     | Source File       | Area Roasted in gel | #Feature | #Feature Roasted in gel | Start | End | PTM                                   | AScore                                                | Found By  |
|--------------------------------------------------|------|--------|-----------|--------|------|-----------|---|-------|----------|----------|-------------------|---------------------|----------|-------------------------|-------|-----|---------------------------------------|-------------------------------------------------------|-----------|
| K.TDSRPSIANLAGENSIIDNLPEEVVANSYR.L               | Y    | 132.04 | 3243.6006 | 30     | 5.0  | 1082.2129 | 3 | 36.29 | 35       | F35:1782 | OB5946 H2 Ro.raw  | 1.3497E7            | 15       | 15                      | 450   | 479 |                                       |                                                       | PEAKS DB  |
| R.NAM(+15.99)FVPHYTLNAHTIVVALNGR.A               | Y    | 115.24 | 2453.2637 | 22     | 1.4  | 818.7629  | 3 | 34.16 | 29       | F29:1519 | OB5922 H2 Ro.raw  | 2.32E6              | 3        | 3                       | 381   | 402 | Oxidation (M)                         | M3:Oxidation (M):1000.00                              | PEAKS DB  |
| R.S(+57.02)VNELDLPILGWLGLSAQHGTIYR.N             | Y    | 113.97 | 2708.4285 | 24     | -0.8 | 1355.2205 | 2 | 40.55 | 29       | F29:1898 | OB5922 H2 Ro.raw  | 4.7421E5            | 1        | 1                       | 357   | 380 |                                       | S1:Carbamidom ethylation (DHK E, X@N-term): 0.00      | PEAKS PTM |
| R.SSNPDIYNPQAGSLR.S                              | Y    | 113.20 | 1617.7747 | 15     | 0.7  | 809.8952  | 2 | 29.12 | 29       | F29:1205 | OB5922 H2 Ro.raw  | 1.3276E6            | 6        | 6                       | 342   | 356 |                                       |                                                       | PEAKS DB  |
| K.AQSENYEYLAFK.T                                 | Y    | 111.58 | 1461.6776 | 12     | 0.6  | 731.8465  | 2 | 31.92 | 29       | F29:1369 | OB5922 H2 Ro.raw  | 6.5899E6            | 6        | 6                       | 438   | 449 |                                       |                                                       | PEAKS DB  |
| L.PILGWLGLSAQHGTIYR.N                            | Y    | 107.51 | 1881.0261 | 17     | 0.7  | 941.5210  | 2 | 40.57 | 29       | F29:1889 | OB5922 H2 Ro.raw  | 2.9616E5            | 2        | 2                       | 364   | 380 |                                       |                                                       | PEAKS DB  |
| R.FYLAGNQEQEFLR.Y                                | Y    | 105.48 | 1613.7837 | 13     | 0.1  | 807.8992  | 2 | 32.67 | 38       | F38:1561 | OB5951 H3A Ro.raw | 5.1792E4            | 4        | 4                       | 196   | 208 |                                       |                                                       | PEAKS DB  |
| R.NAM(+15.99)FVPHYTLNAHTIVVALN(+.98)GR.A         | Y    | 100.76 | 2454.2478 | 22     | 0.3  | 819.0901  | 3 | 32.82 | 34       | F34:1580 | OB5945 H2 Ro.raw  | 1.0956E6            | 4        | 4                       | 381   | 402 | Oxidation (M); Deamidation (NQ)       | M3:Oxidation (M):1000.00;N2 0:Deamidation (NQ):104.25 | PEAKS DB  |
| R.AHVQVVDSDNGN(+.98)RVYDEELQEGHVLVVPQNFAVAAK.A   | Y    | 91.52  | 3831.9180 | 35     | 1.5  | 1278.3152 | 3 | 32.86 | 29       | F29:1448 | OB5922 H2 Ro.raw  | 3.2728E6            | 4        | 4                       | 403   | 437 |                                       | N11:Deamidatio n (NQ):15.73                           | PEAKS DB  |
| K.TDSRPSIANLAGENSIIDNLPEEVVANSYRLRP.E            | Y    | 90.25  | 3609.8386 | 33     | 3.4  | 903.4700  | 4 | 37.52 | 29       | F29:1753 | OB5922 H2 Ro.raw  | 2.6255E7            | 6        | 6                       | 450   | 482 |                                       |                                                       | PEAKS DB  |
| R.AHVQVVDSDN(+.98)GNRVYDEELQEGHVLVVPQNFAVAAK.A   | Y    | 89.16  | 3831.9180 | 35     | 4.4  | 1278.3188 | 3 | 32.26 | 34       | F34:1553 | OB5945 H2 Ro.raw  | 5.1124E6            | 4        | 4                       | 403   | 437 | Deamidation (NQ)                      | N9:Deamidation (NQ):39.44                             | PEAKS DB  |
| R.SVNELDLPILGW(+31.99)LGLSAQHGTIYR.N             | Y    | 89.05  | 2683.3970 | 24     | 2.4  | 1342.7090 | 2 | 39.79 | 29       | F29:1852 | OB5922 H2 Ro.raw  | 7.442E4             | 1        | 1                       | 357   | 380 | Dihydroxy                             | W12:Dihydroxy: 44.28                                  | PEAKS PTM |
| K.A(+57.02)QSENYEYLAFK.T                         | Y    | 86.48  | 1518.6990 | 12     | -0.7 | 760.3562  | 2 | 31.51 | 34       | F34:1505 | OB5945 H2 Ro.raw  | 1.9478E5            | 3        | 3                       | 438   | 449 | Carbamidomethylation (DHKE, X@N-term) | A1:Carbamidom ethylation (DHK E, X@N-term):5 6.34     | PEAKS PTM |
| K.FFVPPFDHQSRE.V                                 | Y    | 78.58  | 1635.7504 | 13     | 0.3  | 818.8827  | 2 | 32.86 | 29       | F29:1440 | OB5922 H2 Ro.raw  | 2.6869E6            | 5        | 5                       | 496   | 508 |                                       |                                                       | PEAKS DB  |
| R.LNAQRPDNRIESEGGYIETWNPNNQEFQC(+57.02)AGVALSR.T | Y    | 78.42  | 4132.9409 | 36     | 3.9  | 1034.2466 | 4 | 33.25 | 38       | F38:1571 | OB5951 H3A Ro.raw | 2.0581E7            | 9        | 9                       | 35    | 70  | Carbamidomethylation                  | C29:Carbamido methylation:100 0.00                    | PEAKS DB  |
| N.GIEETIC(+57.02)SASVK.K                         | Y    | 75.28  | 1292.6282 | 12     | 0.9  | 647.3220  | 2 | 29.13 | 34       | F34:1363 | OB5945 H2 Ro.raw  | 6.9435E4            | 3        | 3                       | 325   | 336 | Carbamidomethylation                  | C7:Carbamidom ethylation:1000. 00                     | PEAKS DB  |
| K.TDSRPSIANLAGENSIIDNLPEEVVAN(+.98)SYR.L         | Y    | 75.20  | 3244.5847 | 30     | 1.7  | 1082.5374 | 3 | 35.58 | 34       | F34:1746 | OB5945 H2 Ro.raw  | 0                   | 0        | 0                       | 450   | 479 | Deamidation (NQ)                      | N27:Deamidatio n (NQ):78.75                           | PEAKS DB  |
| R.NAM(+15.99)FVPHYTLN(+.98)AHTIVVALNGR.A         | Y    | 66.50  | 2454.2478 | 22     | 1.2  | 819.0908  | 3 | 33.30 | 34       | F34:1613 | OB5945 H2 Ro.raw  | 0                   | 0        | 0                       | 381   | 402 | Oxidation (M)                         | M3:Oxidation (M):1000.00;N1 1:Deamidation (NQ):0.00   | PEAKS DB  |
| R.VYDEELQEGHVLVVPQNFAVAAK.A                      | Y    | 66.30  | 2554.3066 | 23     | 0.5  | 852.4432  | 3 | 33.26 | 35       | F35:1608 | OB5946 H2 Ro.raw  | 2.0809E4            | 1        | 1                       | 415   | 437 |                                       |                                                       | PEAKS DB  |
| N.GIEETIC(+57.02)SASVKK.N                        | Y    | 64.42  | 1420.7231 | 13     | 1.3  | 711.3698  | 2 | 28.13 | 29       | F29:1149 | OB5922 H2 Ro.raw  | 1.9909E5            | 4        | 4                       | 325   | 337 | Carbamidomethylation                  | C7:Carbamidom ethylation:1000. 00                     | PEAKS DB  |
| R.RFYLAGNQEQEFLR.Y                               | Y    | 63.90  | 1769.8849 | 14     | -1.3 | 590.9681  | 3 | 31.33 | 38       | F38:1486 | OB5951 H3A Ro.raw | 6.7764E4            | 3        | 3                       | 195   | 208 |                                       |                                                       | PEAKS DB  |
| total 54 peptides                                |      |        |           |        |      |           |   |       |          |          |                   |                     |          |                         |       |     |                                       |                                                       |           |

| Peptide                                                | Uniq | -10lgP | Mass      | Length | ppm  | m/z       | z | RT    | Fraction | Scan     | Source File       | Area Roasted in gel | #Feature | #Feature Roasted in gel | Start | End | PTM                                                                        | AScore                                                                        | Found By  |
|--------------------------------------------------------|------|--------|-----------|--------|------|-----------|---|-------|----------|----------|-------------------|---------------------|----------|-------------------------|-------|-----|----------------------------------------------------------------------------|-------------------------------------------------------------------------------|-----------|
| R.AHVQVVDN(+.98)GN(+.98)RVYDEELQEGHVLVVPQNFAVA.A       | Y    | 62.76  | 3832.9019 | 35     | 7.9  | 767.5937  | 5 | 32.26 | 34       | F34:1556 | OB5945 H2 Ro.raw  | 3.9346E5            | 1        | 1                       | 403   | 437 |                                                                            | N9:Deamidation (NQ):5.83;N11:Deamidation (NQ):8.28                            | PEAKS DB  |
| R.N(+.98)AMFVPHYTLNAHTIVVALNGR.A                       | Y    | 60.88  | 2438.2529 | 22     | 3.0  | 1220.1375 | 2 | 33.96 | 34       | F34:1680 | OB5945 H2 Ro.raw  | 9.5447E5            | 1        | 1                       | 381   | 402 | Deamidation (NQ)                                                           | N1:Deamidation (NQ):63.03                                                     | PEAKS DB  |
| D.LPILGLWGLSAHQGTIYR.N                                 | Y    | 60.53  | 1994.1101 | 18     | 2.4  | 998.0647  | 2 | 40.55 | 29       | F29:1901 | OB5922 H2 Ro.raw  | 1.1908E5            | 1        | 1                       | 363   | 380 |                                                                            |                                                                               | PEAKS DB  |
| V.PQNFAVA.A                                            | N    | 59.75  | 944.5079  | 9      | 0.9  | 473.2617  | 2 | 32.86 | 29       | F29:1447 | OB5922 H2 Ro.raw  | 2.0461E6            | 3        | 3                       | 429   | 437 |                                                                            |                                                                               | PEAKS DB  |
| K.FFVPPFDHQS(+15.99)RE.V                               | Y    | 57.98  | 1651.7452 | 13     | 1.7  | 826.8813  | 2 | 32.49 | 29       | F29:1425 | OB5922 H2 Ro.raw  | 3.6985E5            | 3        | 3                       | 496   | 508 | Oxidation (M)                                                              | M11:Oxidation (M):1000.00                                                     | PEAKS DB  |
| R.Q(-17.03)LKNNNPFK.F                                  | N    | 56.41  | 1084.5665 | 9      | 1.6  | 543.2914  | 2 | 28.75 | 34       | F34:1346 | OB5945 H2 Ro.raw  | 1.0606E4            | 2        | 2                       | 487   | 495 | Pyro-glu from Q                                                            | Q1:Pyro-glu from Q:1000.00                                                    | PEAKS PTM |
| R.VRGDEQENEGSNIFSGFAQEFLQHAFQVDR.Q                     | Y    | 55.37  | 3453.5974 | 30     | 4.1  | 864.4102  | 4 | 39.78 | 40       | F40:1952 | OB5953 H3A Ro.raw | 3.9334E5            | 2        | 2                       | 226   | 255 |                                                                            |                                                                               | PEAKS DB  |
| R.RPFYSNAPLEIYVQGGSGYFGLIFPGC(+57.02)PSTYEPAQEGR.R     | Y    | 54.12  | 4424.0845 | 39     | 5.3  | 1475.7100 | 3 | 38.84 | 39       | F39:1912 | OB5952 H3A Ro.raw | 1.0194E6            | 2        | 2                       | 80    | 118 | Carbamidomethylation                                                       | C27:Carbamidomethylation:100.0.00                                             | PEAKS DB  |
| R.NAMFVPHYTLNAH(+57.02)TIVVALNGR.A                     | Y    | 50.87  | 2494.2903 | 22     | -3.1 | 832.4348  | 3 | 34.84 | 34       | F34:1702 | OB5945 H2 Ro.raw  | 0                   | 0        | 0                       | 381   | 402 |                                                                            | H13:Carbamidomethylation (DHKE, X@N-term):5.30                                | PEAKS PTM |
| K.AQSENIEYLAFKTDSPSIANLAGENSIIDNLPeeVVANSYR.L          | Y    | 48.94  | 4687.2676 | 42     | 3.1  | 1172.8278 | 4 | 36.79 | 34       | F34:1810 | OB5945 H2 Ro.raw  | 2.0852E6            | 1        | 1                       | 438   | 479 |                                                                            |                                                                               | PEAKS DB  |
| R.RPFYSNAPLEIYVQGGSGYFGLIFPGC(+57.02)PSTYEPAQEGRR.Y    | Y    | 48.23  | 4580.1860 | 40     | 7.2  | 1146.0620 | 4 | 37.82 | 38       | F38:1860 | OB5951 H3A Ro.raw | 1.9768E5            | 1        | 1                       | 80    | 119 | Carbamidomethylation                                                       | C27:Carbamidomethylation:100.0.00                                             | PEAKS DB  |
| K.NNNPFKFFVPPFDHQS.MRE.V                               | Y    | 46.05  | 2350.0952 | 19     | 1.4  | 784.3734  | 3 | 34.54 | 34       | F34:1693 | OB5945 H2 Ro.raw  | 4.2082E5            | 2        | 2                       | 490   | 508 |                                                                            |                                                                               | PEAKS DB  |
| R.SVN(+.98)ELDLPLGLWGLSAHQGTIYR.N                      | Y    | 45.95  | 2652.3911 | 24     | 9.1  | 1327.2150 | 2 | 46.79 | 29       | F29:2254 | OB5922 H2 Ro.raw  | 0                   | 0        | 0                       | 357   | 380 | Deamidation (NQ)                                                           | N3:Deamidation (NQ):57.31                                                     | PEAKS DB  |
| R.AHVQ(+.98)VVDSSNGNRVYDEELQEGHVLVVPQNFAVA.A           | Y    | 45.08  | 3831.9180 | 35     | 2.7  | 767.3929  | 5 | 32.86 | 29       | F29:1451 | OB5922 H2 Ro.raw  | 3.9416E5            | 1        | 1                       | 403   | 437 |                                                                            | Q4:Deamidation (NQ):0.00                                                      | PEAKS DB  |
| K.FFVPPFDHQS.MR                                        | Y    | 43.41  | 1350.6067 | 11     | 0.3  | 676.3108  | 2 | 34.60 | 35       | F35:1680 | OB5946 H2 Ro.raw  | 2.36E5              | 3        | 3                       | 496   | 506 |                                                                            |                                                                               | PEAKS DB  |
| K.TDSRPSIANLAGENSIIDNLPeeVVAN(+.98)SYRLPR.E            | Y    | 39.68  | 3610.8225 | 33     | 5.4  | 1204.6213 | 3 | 35.38 | 34       | F34:1734 | OB5945 H2 Ro.raw  | 0                   | 0        | 0                       | 450   | 482 | Deamidation (NQ)                                                           | N27:Deamidation (NQ):32.94                                                    | PEAKS DB  |
| R.NALRRPFYSNAPLEIYVQGGSGYFGLIFPGC(+57.02)PSTYEPAQEGR.R | Y    | 39.53  | 4878.3501 | 43     | 2.7  | 1220.5981 | 4 | 38.66 | 40       | F40:1897 | OB5953 H3A Ro.raw | 5.9202E5            | 2        | 2                       | 76    | 118 | Carbamidomethylation                                                       | C31:Carbamidomethylation:100.0.00                                             | PEAKS DB  |
| K.FFVPPFDHQS.M                                         | Y    | 38.94  | 1219.5662 | 10     | 1.5  | 610.7913  | 2 | 33.58 | 34       | F34:1616 | OB5945 H2 Ro.raw  | 1.6091E5            | 1        | 1                       | 496   | 505 |                                                                            |                                                                               | PEAKS DB  |
| N.G(+57.02)IEETIC(+57.02)SASVKK.N                      | Y    | 37.63  | 1477.7446 | 13     | -0.5 | 739.8792  | 2 | 28.58 | 29       | F29:1182 | OB5922 H2 Ro.raw  | 1.8561E4            | 2        | 2                       | 325   | 337 | Carbamidomethylation (DHKE, X@N-term);2.85;C7:Carbamidomethylation:1000.00 | G1:Carbamidomethylation (DHKE, X@N-term):2.85;C7:Carbamidomethylation:1000.00 | PEAKS PTM |
| R.NAMFVPHYTLNAH(+57.02)TIVVALN(+.98)GR.A               | Y    | 36.75  | 2495.2744 | 22     | 0.0  | 832.7654  | 3 | 33.96 | 34       | F34:1660 | OB5945 H2 Ro.raw  | 1.2865E5            | 1        | 1                       | 381   | 402 | Deamidation (NQ)                                                           | H13:Carbamidomethylation (DHKE, X@N-term):0.00;N20:Deamidation (NQ):43.52     | PEAKS PTM |
| total 54 peptides                                      |      |        |           |        |      |           |   |       |          |          |                   |                     |          |                         |       |     |                                                                            |                                                                               |           |

| Peptide                                                   | Uniq | -10lgP | Mass      | Length | ppm  | m/z       | z | RT    | Fraction | Scan     | Source File       | Area Roasted in gel | #Feature | #Feature Roasted in gel | Start | End | PTM                                                                                       | AScore                                                                                                          | Found By  |
|-----------------------------------------------------------|------|--------|-----------|--------|------|-----------|---|-------|----------|----------|-------------------|---------------------|----------|-------------------------|-------|-----|-------------------------------------------------------------------------------------------|-----------------------------------------------------------------------------------------------------------------|-----------|
| R.RPFYSNAPLEIYVQQGSGYFGLIFPGC(+57.02)PSTYEPAQ(+.98)EGRR.Y | Y    | 36.17  | 4581.1699 | 40     | 8.8  | 1146.3098 | 4 | 38.27 | 39       | F39:1881 | OB5952 H3A Ro.raw | 4.8906E5            | 2        | 2                       | 80    | 119 | Carbamidomethylation                                                                      | C27:Carbamido methylation:100 0.00;Q36:Deami dation (NQ):12. 58                                                 | PEAKS DB  |
| R.SSNPD(+21.98)IYNPQAGSLR.S                               | Y    | 34.15  | 1639.7566 | 15     | 4.2  | 820.8890  | 2 | 29.21 | 29       | F29:1226 | OB5922 H2 Ro.raw  | 0                   | 0        | 0                       | 342   | 356 | Sodium adduct                                                                             | D5:Sodium add uct:43.70                                                                                         | PEAKS PTM |
| K.FFVPPFDHQSM(+15.99).R                                   | Y    | 33.46  | 1366.6016 | 11     | 1.6  | 684.3091  | 2 | 33.79 | 29       | F29:1494 | OB5922 H2 Ro.raw  | 5.6927E4            | 1        | 1                       | 496   | 506 | Oxidation (M)                                                                             | M11:Oxidation (M):1000.00                                                                                       | PEAKS DB  |
| R.IESEGgyIETWNPNNQEFQC(+57.02)AGVALSR.T                   | N    | 30.17  | 3068.3933 | 27     | -0.9 | 1023.8041 | 3 | 34.37 | 33       | F33:1699 | OB5944 H6 Ro.raw  | 0                   | 0        | 0                       | 44    | 70  | Carbamidomethylation                                                                      | C20:Carbamido methylation:100 0.00                                                                              | PEAKS DB  |
| R.S(+57.02)SNPDIYNPQAGSLR.S                               | Y    | 29.73  | 1674.7961 | 15     | 7.9  | 838.4119  | 2 | 29.48 | 29       | F29:1242 | OB5922 H2 Ro.raw  | 0                   | 0        | 0                       | 342   | 356 |                                                                                           | S1:Carbamidom ethylation (DHK E, X@N-term):1 1.12                                                               | PEAKS PTM |
| N.G(+41.03)IETIC(+57.02)SASVK.K                           | Y    | 29.70  | 1333.6548 | 12     | 0.4  | 667.8350  | 2 | 29.26 | 35       | F35:1372 | OB5946 H2 Ro.raw  | 8.2083E3            | 1        | 1                       | 325   | 336 | Amidination of lysines or N-terminal amines with methyl acetimidate; Carbamidomethylation | G1:Amidination of lysines or N-t ermal amines with methyl acet imidate:71.87;C 7:Carbamidome thylation:1000.0 0 | PEAKS PTM |
| R.LNAQRPDNRIESEGgyIETWN(+.98)PNNQEFQC(+57.02)AGVALSR.T    | Y    | 29.65  | 4133.9248 | 36     | -0.7 | 1034.4878 | 4 | 43.56 | 39       | F39:2183 | OB5952 H3A Ro.raw | 0                   | 0        | 0                       | 35    | 70  | Carbamidomethylation                                                                      | N21:Deamidatio n (NQ):7.58;C2 9:Carbamidome thylation:1000.0 0                                                  | PEAKS DB  |
| K.TDSRPSIAN(+.98)LAGEN(+.98)SIIDNLPEEVVANSYR.L            | Y    | 29.26  | 3245.5686 | 30     | 4.2  | 1082.8680 | 3 | 47.69 | 29       | F29:2306 | OB5922 H2 Ro.raw  | 0                   | 0        | 0                       | 450   | 479 |                                                                                           | N9:Deamidation (NQ):12.20;N1 4:Deamidation (NQ):10.19                                                           | PEAKS DB  |
| K.AQSENYE(+21.98)YLAFK.T                                  | Y    | 28.80  | 1483.6595 | 12     | -1.5 | 742.8359  | 2 | 31.58 | 35       | F35:1513 | OB5946 H2 Ro.raw  | 8.2984E3            | 1        | 1                       | 438   | 449 |                                                                                           | E7:Sodium addu ct:0.00                                                                                          | PEAKS PTM |
| R.LNAQRPDN(+.98)RIESEGgyIETWNPNNQEFQC(+57.02)AGVALSR.T    | Y    | 28.37  | 4133.9248 | 36     | 5.5  | 1034.4941 | 4 | 34.29 | 31       | F31:1691 | OB5942 H6 Ro.raw  | 0                   | 0        | 0                       | 35    | 70  | Carbamidomethylation                                                                      | N8:Deamidation (NQ):0.00;C29: Carbamidometh ylation:1000.00                                                     | PEAKS DB  |
| total 54 peptides                                         |      |        |           |        |      |           |   |       |          |          |                   |                     |          |                         |       |     |                                                                                           |                                                                                                                 |           |

| [Protein Coverage](#) | [Supporting Peptides](#) |

Protein Coverage:

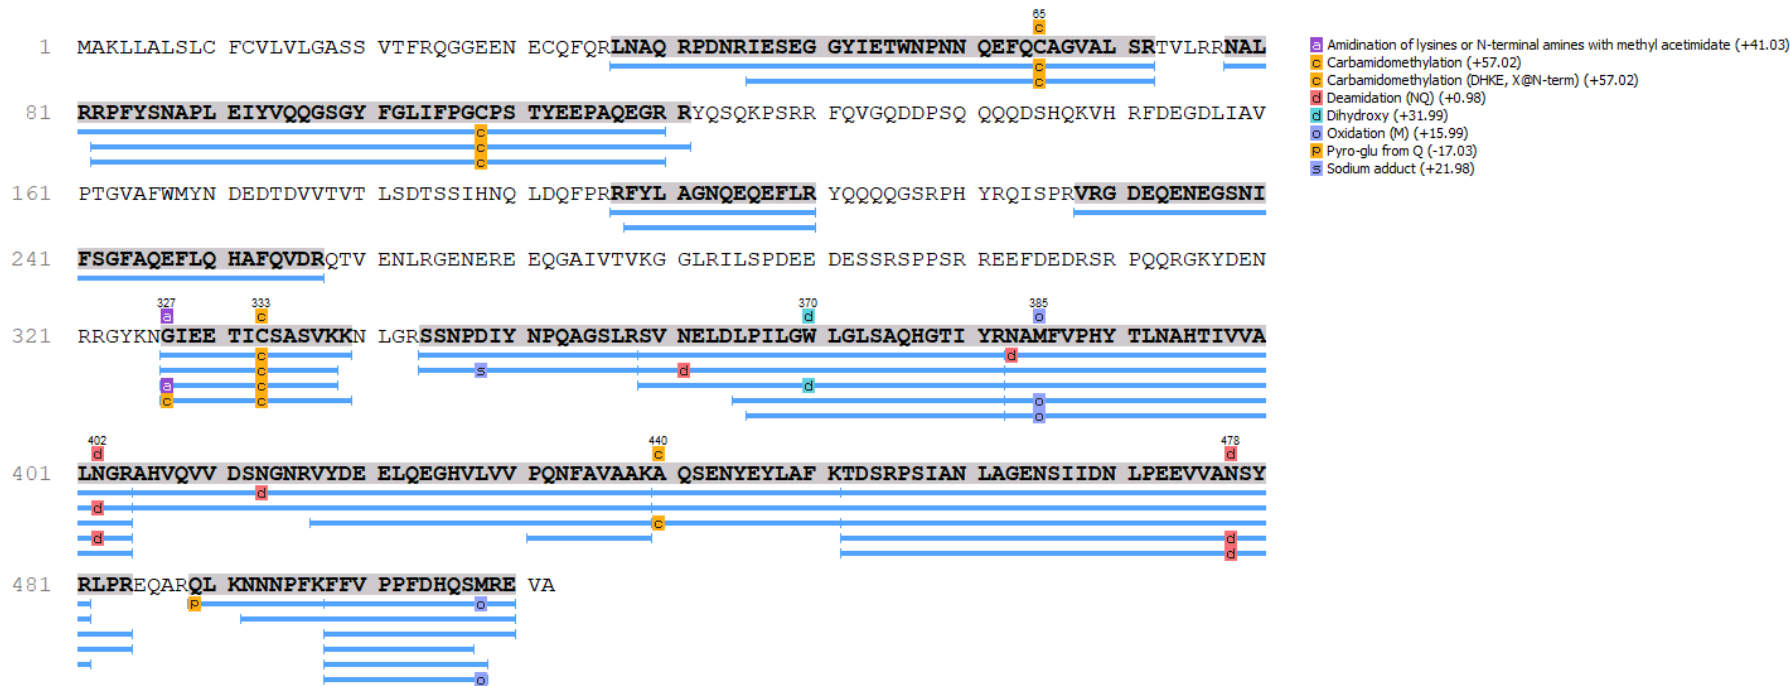

Supporting Peptides:

| Peptide                              | Uniq | -10lgP | Mass      | Length | ppm  | m/z       | z | RT    | Fraction | Scan     | Source File       | Area Roasted in gel | #Feature | #Feature Roasted in gel | Start | End | PTM              | AScore                                        | Found By  |
|--------------------------------------|------|--------|-----------|--------|------|-----------|---|-------|----------|----------|-------------------|---------------------|----------|-------------------------|-------|-----|------------------|-----------------------------------------------|-----------|
| R.NAMFVPHYTLNAHTIVVALN(+.98)GR.A     | Y    | 152.35 | 2438.2529 | 22     | 3.0  | 1220.1375 | 2 | 33.96 | 34       | F34:1643 | OB5945 H2 Ro.raw  | 9.2221E6            | 5        | 5                       | 383   | 404 | Deamidation (NQ) | N20:Deamidation (NQ):180.29                   | PEAKS DB  |
| R.NAMFVPHYTLNAHTIVVALNGR.A           | Y    | 141.80 | 2437.2688 | 22     | 3.5  | 1219.6460 | 2 | 34.54 | 34       | F34:1687 | OB5945 H2 Ro.raw  | 7.7824E6            | 7        | 7                       | 383   | 404 |                  |                                               | PEAKS DB  |
| R.SVNELDLPILGWLGLSAQHGTIYR.N         | Y    | 132.10 | 2651.4070 | 24     | 3.8  | 1326.7158 | 2 | 39.91 | 35       | F35:1991 | OB5946 H2 Ro.raw  | 6.4841E7            | 30       | 30                      | 359   | 382 |                  |                                               | PEAKS DB  |
| K.TDSRPSIANLAGENSIIDNLPEEVVANSYR.L   | Y    | 132.04 | 3243.6006 | 30     | 5.0  | 1082.2129 | 3 | 36.29 | 35       | F35:1782 | OB5946 H2 Ro.raw  | 1.3497E7            | 15       | 15                      | 452   | 481 |                  |                                               | PEAKS DB  |
| R.NAM(+15.99)FVPHYTLNAHTIVVALNGR.A   | Y    | 115.24 | 2453.2637 | 22     | 1.4  | 818.7629  | 3 | 34.16 | 29       | F29:1519 | OB5922 H2 Ro.raw  | 2.32E6              | 3        | 3                       | 383   | 404 | Oxidation (M)    | M3:Oxidation (M):1000.00                      | PEAKS DB  |
| R.S(+57.02)VNELDLPILGWLGLSAQHGTIYR.N | Y    | 113.97 | 2708.4285 | 24     | -0.8 | 1355.2205 | 2 | 40.55 | 29       | F29:1898 | OB5922 H2 Ro.raw  | 4.7421E5            | 1        | 1                       | 359   | 382 |                  | S1:Carbamidomethylation (DHKE, X@N-term):0.00 | PEAKS PTM |
| R.SSNPDIYNPQAGSLR.S                  | Y    | 113.20 | 1617.7747 | 15     | 0.7  | 809.8952  | 2 | 29.12 | 29       | F29:1205 | OB5922 H2 Ro.raw  | 1.3276E6            | 6        | 6                       | 344   | 358 |                  |                                               | PEAKS DB  |
| K.AQSENYEYLAFAK.T                    | Y    | 111.58 | 1461.6776 | 12     | 0.6  | 731.8465  | 2 | 31.92 | 29       | F29:1369 | OB5922 H2 Ro.raw  | 6.5899E6            | 6        | 6                       | 440   | 451 |                  |                                               | PEAKS DB  |
| L.PILGWLGLSAQHGTIYR.N                | Y    | 107.51 | 1881.0261 | 17     | 0.7  | 941.5210  | 2 | 40.57 | 29       | F29:1889 | OB5922 H2 Ro.raw  | 2.9616E5            | 2        | 2                       | 366   | 382 |                  |                                               | PEAKS DB  |
| R.FYLAGNQEQEFLR.Y                    | Y    | 105.48 | 1613.7837 | 13     | 0.1  | 807.8992  | 2 | 32.67 | 38       | F38:1561 | OB5951 H3A Ro.raw | 5.1792E4            | 4        | 4                       | 198   | 210 |                  |                                               | PEAKS DB  |
| total 54 peptides                    |      |        |           |        |      |           |   |       |          |          |                   |                     |          |                         |       |     |                  |                                               |           |

| Peptide                                          | Uniq | -10lgP | Mass      | Length | ppm  | m/z       | z | RT    | Fraction | Scan     | Source File       | Area Roasted in gel | #Feature | #Feature Roasted in gel | Start | End | PTM                                   | AScore                                               | Found By  |
|--------------------------------------------------|------|--------|-----------|--------|------|-----------|---|-------|----------|----------|-------------------|---------------------|----------|-------------------------|-------|-----|---------------------------------------|------------------------------------------------------|-----------|
| R.NAM(+15.99)FVPHYTLNAHTIVVALN(+.98)GR.A         | Y    | 100.76 | 2454.2478 | 22     | 0.3  | 819.0901  | 3 | 32.82 | 34       | F34:1580 | OB5945 H2 Ro.raw  | 1.0956E6            | 4        | 4                       | 383   | 404 | Oxidation (M); Deamidation (NQ)       | M3:Oxidation (M):1000.00;N20:Deamidation (NQ):104.25 | PEAKS DB  |
| R.AHVQVVDNNGN(+.98)RVYDEELQEGHVLVVPQNFAVA.A      | Y    | 91.52  | 3831.9180 | 35     | 1.5  | 1278.3152 | 3 | 32.86 | 29       | F29:1448 | OB5922 H2 Ro.raw  | 3.2728E6            | 4        | 4                       | 405   | 439 |                                       | N11:Deamidation (NQ):15.73                           | PEAKS DB  |
| K.TDSRPSIANLAGENSIIDNLPEEVVANSYRLPR.E            | Y    | 90.25  | 3609.8386 | 33     | 3.4  | 903.4700  | 4 | 37.52 | 29       | F29:1753 | OB5922 H2 Ro.raw  | 2.6255E7            | 6        | 6                       | 452   | 484 |                                       |                                                      | PEAKS DB  |
| R.AHVQVVDN(+.98)GNRVYDEELQEGHVLVVPQNFAVA.A       | Y    | 89.16  | 3831.9180 | 35     | 4.4  | 1278.3188 | 3 | 32.26 | 34       | F34:1553 | OB5945 H2 Ro.raw  | 5.1124E6            | 4        | 4                       | 405   | 439 | Deamidation (NQ)                      | N9:Deamidation (NQ):39.44                            | PEAKS DB  |
| R.SVNELDLPLGW(+31.99)LGLSAQHGTIYR.N              | Y    | 89.05  | 2683.3970 | 24     | 2.4  | 1342.7090 | 2 | 39.79 | 29       | F29:1852 | OB5922 H2 Ro.raw  | 7.442E4             | 1        | 1                       | 359   | 382 | Dihydroxy                             | W12:Dihydroxy:44.28                                  | PEAKS PTM |
| K.A(+57.02)QSENYEYLAFK.T                         | Y    | 86.48  | 1518.6990 | 12     | -0.7 | 760.3562  | 2 | 31.51 | 34       | F34:1505 | OB5945 H2 Ro.raw  | 1.9478E5            | 3        | 3                       | 440   | 451 | Carbamidomethylation (DHKE, X@N-term) | A1:Carbamidomethylation (DHKE, X@N-term):56.34       | PEAKS PTM |
| K.FFVPPFDHQMRE.V                                 | Y    | 78.58  | 1635.7504 | 13     | 0.3  | 818.8827  | 2 | 32.86 | 29       | F29:1440 | OB5922 H2 Ro.raw  | 2.6869E6            | 5        | 5                       | 498   | 510 |                                       |                                                      | PEAKS DB  |
| R.LNAQRPDNRIESEGGYIETWNPNNQEFQC(+57.02)AGVALSR.T | Y    | 78.42  | 4132.9409 | 36     | 3.9  | 1034.2466 | 4 | 33.25 | 38       | F38:1571 | OB5951 H3A Ro.raw | 2.0581E7            | 9        | 9                       | 37    | 72  | Carbamidomethylation                  | C29:Carbamidomethylation:1000.00                     | PEAKS DB  |
| N.GIEETIC(+57.02)SASVK.K                         | Y    | 75.28  | 1292.6282 | 12     | 0.9  | 647.3220  | 2 | 29.13 | 34       | F34:1363 | OB5945 H2 Ro.raw  | 6.9435E4            | 3        | 3                       | 327   | 338 | Carbamidomethylation                  | C7:Carbamidomethylation:1000.00                      | PEAKS DB  |
| K.TDSRPSIANLAGENSIIDNLPEEVVAN(+.98)SYR.L         | Y    | 75.20  | 3244.5847 | 30     | 1.7  | 1082.5374 | 3 | 35.58 | 34       | F34:1746 | OB5945 H2 Ro.raw  | 0                   | 0        | 0                       | 452   | 481 | Deamidation (NQ)                      | N27:Deamidation (NQ):78.75                           | PEAKS DB  |
| R.NAM(+15.99)FVPHYTLN(+.98)AHTIVVALNGR.A         | Y    | 66.50  | 2454.2478 | 22     | 1.2  | 819.0908  | 3 | 33.30 | 34       | F34:1613 | OB5945 H2 Ro.raw  | 0                   | 0        | 0                       | 383   | 404 | Oxidation (M)                         | M3:Oxidation (M):1000.00;N11:Deamidation (NQ):0.00   | PEAKS DB  |
| R.VYDEELQEGHVLVVPQNFAVA.A                        | Y    | 66.30  | 2554.3066 | 23     | 0.5  | 852.4432  | 3 | 33.26 | 35       | F35:1608 | OB5946 H2 Ro.raw  | 2.0809E4            | 1        | 1                       | 417   | 439 |                                       |                                                      | PEAKS DB  |
| N.GIEETIC(+57.02)SASVKK.N                        | Y    | 64.42  | 1420.7231 | 13     | 1.3  | 711.3698  | 2 | 28.13 | 29       | F29:1149 | OB5922 H2 Ro.raw  | 1.9909E5            | 4        | 4                       | 327   | 339 | Carbamidomethylation                  | C7:Carbamidomethylation:1000.00                      | PEAKS DB  |
| R.RFYLAGNQEQEFLR.Y                               | Y    | 63.90  | 1769.8849 | 14     | -1.3 | 590.9681  | 3 | 31.33 | 38       | F38:1486 | OB5951 H3A Ro.raw | 6.7764E4            | 3        | 3                       | 197   | 210 |                                       |                                                      | PEAKS DB  |
| R.AHVQVVDN(+.98)GN(+.98)RVYDEELQEGHVLVVPQNFAVA.A | Y    | 62.76  | 3832.9019 | 35     | 7.9  | 767.5937  | 5 | 32.26 | 34       | F34:1556 | OB5945 H2 Ro.raw  | 3.9346E5            | 1        | 1                       | 405   | 439 |                                       | N9:Deamidation (NQ):5.83;N11:Deamidation (NQ):8.28   | PEAKS DB  |
| R.N(+.98)AMFVPHYTLNAHTIVVALNGR.A                 | Y    | 60.88  | 2438.2529 | 22     | 3.0  | 1220.1375 | 2 | 33.96 | 34       | F34:1680 | OB5945 H2 Ro.raw  | 9.5447E5            | 1        | 1                       | 383   | 404 | Deamidation (NQ)                      | N1:Deamidation (NQ):63.03                            | PEAKS DB  |
| D.LPLIGWLGLSAQHGTIYR.N                           | Y    | 60.53  | 1994.1101 | 18     | 2.4  | 998.0647  | 2 | 40.55 | 29       | F29:1901 | OB5922 H2 Ro.raw  | 1.1908E5            | 1        | 1                       | 365   | 382 |                                       |                                                      | PEAKS DB  |
| V.PQNFAVA.A                                      | N    | 59.75  | 944.5079  | 9      | 0.9  | 473.2617  | 2 | 32.86 | 29       | F29:1447 | OB5922 H2 Ro.raw  | 2.0461E6            | 3        | 3                       | 431   | 439 |                                       |                                                      | PEAKS DB  |
| K.FFVPPFDHQM(+15.99)RE.V                         | Y    | 57.98  | 1651.7452 | 13     | 1.7  | 826.8813  | 2 | 32.49 | 29       | F29:1425 | OB5922 H2 Ro.raw  | 3.6985E5            | 3        | 3                       | 498   | 510 | Oxidation (M)                         | M11:Oxidation (M):1000.00                            | PEAKS DB  |
| R.Q(-17.03)LKNNNPFK.F                            | N    | 56.41  | 1084.5665 | 9      | 1.6  | 543.2914  | 2 | 28.75 | 34       | F34:1346 | OB5945 H2 Ro.raw  | 1.0606E4            | 2        | 2                       | 489   | 497 | Pyro-glu from Q                       | Q1:Pyro-glu from Q:1000.00                           | PEAKS PTM |
| R.VRGDEQENEGSNIFSGFAQEFLQHAFQVDR.Q               | Y    | 55.37  | 3453.5974 | 30     | 4.1  | 864.4102  | 4 | 39.78 | 40       | F40:1952 | OB5953 H3A Ro.raw | 3.9334E5            | 2        | 2                       | 228   | 257 |                                       |                                                      | PEAKS DB  |
| total 54 peptides                                |      |        |           |        |      |           |   |       |          |          |                   |                     |          |                         |       |     |                                       |                                                      |           |



| Peptide                                                    | Uniq | -10lgP | Mass      | Length | ppm  | m/z       | z | RT    | Fraction | Scan     | Source File       | Area Roasted in gel | #Feature | #Feature Roasted in gel | Start | End | PTM                                                                                       | AScore                                                                                                      | Found By  |
|------------------------------------------------------------|------|--------|-----------|--------|------|-----------|---|-------|----------|----------|-------------------|---------------------|----------|-------------------------|-------|-----|-------------------------------------------------------------------------------------------|-------------------------------------------------------------------------------------------------------------|-----------|
| R.RPFYSNAPLEIYVQQGSGYFGLIFPGC(+57.02)PSTYEPAQEGR.R         | Y    | 54.12  | 4424.0845 | 39     | 5.3  | 1475.7100 | 3 | 38.84 | 39       | F39:1912 | OB5952 H3A Ro.raw | 1.0194E6            | 2        | 2                       | 82    | 120 | Carbamidomethylation                                                                      | C27:Carbamido methylation:100 0.00                                                                          | PEAKS DB  |
| R.NAMFVPHYTLNAH(+57.02)TIVVALNGR.A                         | Y    | 50.87  | 2494.2903 | 22     | -3.1 | 832.4348  | 3 | 34.84 | 34       | F34:1702 | OB5945 H2 Ro.raw  | 0                   | 0        | 0                       | 383   | 404 |                                                                                           | H13:Carbamido methylation (DH KE, X@N-term): 5.30                                                           | PEAKS PTM |
| K.AQSENIEYLAFKTDSPSIANLAGENSIIDNLPEEVVANSYR.L              | Y    | 48.94  | 4687.2676 | 42     | 3.1  | 1172.8278 | 4 | 36.79 | 34       | F34:1810 | OB5945 H2 Ro.raw  | 2.0852E6            | 1        | 1                       | 440   | 481 |                                                                                           |                                                                                                             | PEAKS DB  |
| R.RPFYSNAPLEIYVQQGSGYFGLIFPGC(+57.02)PSTYEPAQEGR.R.Y       | Y    | 48.23  | 4580.1860 | 40     | 7.2  | 1146.0620 | 4 | 37.82 | 38       | F38:1860 | OB5951 H3A Ro.raw | 1.9768E5            | 1        | 1                       | 82    | 121 | Carbamidomethylation                                                                      | C27:Carbamido methylation:100 0.00                                                                          | PEAKS DB  |
| K.NNNPFKFFVPPFDHQSM.R.V                                    | Y    | 46.05  | 2350.0952 | 19     | 1.4  | 784.3734  | 3 | 34.54 | 34       | F34:1693 | OB5945 H2 Ro.raw  | 4.2082E5            | 2        | 2                       | 492   | 510 |                                                                                           |                                                                                                             | PEAKS DB  |
| R.SVN(+.98)ELDLPLILGWLGLSAHQGTIYR.N                        | Y    | 45.95  | 2652.3911 | 24     | 9.1  | 1327.2150 | 2 | 46.79 | 29       | F29:2254 | OB5922 H2 Ro.raw  | 0                   | 0        | 0                       | 359   | 382 | Deamidation (NQ)                                                                          | N3:Deamidation (NQ):57.31                                                                                   | PEAKS DB  |
| R.AHVQ(+.98)VVDSNGNRYVDEELQEGHVLVVPQNFVAAB.A               | Y    | 45.08  | 3831.9180 | 35     | 2.7  | 767.3929  | 5 | 32.86 | 29       | F29:1451 | OB5922 H2 Ro.raw  | 3.9416E5            | 1        | 1                       | 405   | 439 |                                                                                           | Q4:Deamidation (NQ):0.00                                                                                    | PEAKS DB  |
| K.FFVPPFDHQSM.R                                            | Y    | 43.41  | 1350.6067 | 11     | 0.3  | 676.3108  | 2 | 34.60 | 35       | F35:1680 | OB5946 H2 Ro.raw  | 2.36E5              | 3        | 3                       | 498   | 508 |                                                                                           |                                                                                                             | PEAKS DB  |
| K.TDSRPSIANLAGENSIIDNLPEEVVAN(+.98)SYRLPR.E                | Y    | 39.68  | 3610.8225 | 33     | 5.4  | 1204.6213 | 3 | 35.38 | 34       | F34:1734 | OB5945 H2 Ro.raw  | 0                   | 0        | 0                       | 452   | 484 | Deamidation (NQ)                                                                          | N27:Deamidation (NQ):32.94                                                                                  | PEAKS DB  |
| R.NALRRPFYSNAPLEIYVQQGSGYFGLIFPGC(+57.02)PSTYEPAQEGR.R     | Y    | 39.53  | 4878.3501 | 43     | 2.7  | 1220.5981 | 4 | 38.66 | 40       | F40:1897 | OB5953 H3A Ro.raw | 5.9202E5            | 2        | 2                       | 78    | 120 | Carbamidomethylation                                                                      | C31:Carbamido methylation:100 0.00                                                                          | PEAKS DB  |
| K.FFVPPFDHQSM                                              | Y    | 38.94  | 1219.5662 | 10     | 1.5  | 610.7913  | 2 | 33.58 | 34       | F34:1616 | OB5945 H2 Ro.raw  | 1.6091E5            | 1        | 1                       | 498   | 507 |                                                                                           |                                                                                                             | PEAKS DB  |
| N.G(+57.02)IETIC(+57.02)SASVKK.N                           | Y    | 37.63  | 1477.7446 | 13     | -0.5 | 739.8792  | 2 | 28.58 | 29       | F29:1182 | OB5922 H2 Ro.raw  | 1.8561E4            | 2        | 2                       | 327   | 339 | Carbamidomethylation (DHKE, X@N-term); Carbamidomethylation                               | G1:Carbamidomethylation (DHKE, X@N-term):2 2.85;C7:Carbamidomethylation: 1000.00                            | PEAKS PTM |
| R.NAMFVPHYTLNAH(+57.02)TIVVALN(+.98)GR.A                   | Y    | 36.75  | 2495.2744 | 22     | 0.0  | 832.7654  | 3 | 33.96 | 34       | F34:1660 | OB5945 H2 Ro.raw  | 1.2865E5            | 1        | 1                       | 383   | 404 | Deamidation (NQ)                                                                          | H13:Carbamido methylation (DH KE, X@N-term): 0.00;N20:Deamidation (NQ):43.52                                | PEAKS PTM |
| R.RPFYSNAPLEIYVQQGSGYFGLIFPGC(+57.02)PSTYEPAQ(+.98)EGR.R.Y | Y    | 36.17  | 4581.1699 | 40     | 8.8  | 1146.3098 | 4 | 38.27 | 39       | F39:1881 | OB5952 H3A Ro.raw | 4.8906E5            | 2        | 2                       | 82    | 121 | Carbamidomethylation                                                                      | C27:Carbamido methylation:100 0.00;Q36:Deamidation (NQ):12.58                                               | PEAKS DB  |
| R.SSNPD(+21.98)IYNPQAGSLR.S                                | Y    | 34.15  | 1639.7566 | 15     | 4.2  | 820.8890  | 2 | 29.21 | 29       | F29:1226 | OB5922 H2 Ro.raw  | 0                   | 0        | 0                       | 344   | 358 | Sodium adduct                                                                             | D5:Sodium adduct:43.70                                                                                      | PEAKS PTM |
| K.FFVPPFDHQSM(+15.99).R                                    | Y    | 33.46  | 1366.6016 | 11     | 1.6  | 684.3091  | 2 | 33.79 | 29       | F29:1494 | OB5922 H2 Ro.raw  | 5.6927E4            | 1        | 1                       | 498   | 508 | Oxidation (M)                                                                             | M11:Oxidation (M):1000.00                                                                                   | PEAKS DB  |
| R.IESEGGYIETWPNPNQEFQC(+57.02)AGVALSR.T                    | N    | 30.17  | 3068.3933 | 27     | -0.9 | 1023.8041 | 3 | 34.37 | 33       | F33:1699 | OB5944 H6 Ro.raw  | 0                   | 0        | 0                       | 46    | 72  | Carbamidomethylation                                                                      | C20:Carbamido methylation:100 0.00                                                                          | PEAKS DB  |
| R.S(+57.02)SNPDIYNPQAGSLR.S                                | Y    | 29.73  | 1674.7961 | 15     | 7.9  | 838.4119  | 2 | 29.48 | 29       | F29:1242 | OB5922 H2 Ro.raw  | 0                   | 0        | 0                       | 344   | 358 |                                                                                           | S1:Carbamidomethylation (DHKE, X@N-term):1 1.12                                                             | PEAKS PTM |
| N.G(+41.03)IETIC(+57.02)SASVK.K                            | Y    | 29.70  | 1333.6548 | 12     | 0.4  | 667.8350  | 2 | 29.26 | 35       | F35:1372 | OB5946 H2 Ro.raw  | 8.2083E3            | 1        | 1                       | 327   | 338 | Amidination of lysines or N-terminal amines with methyl acetimidate; Carbamidomethylation | G1:Amidination of lysines or N-terminal amines with methyl acetimidate:71.87;C7:Carbamidomethylation:1000.0 | PEAKS PTM |
| total 54 peptides                                          |      |        |           |        |      |           |   |       |          |          |                   |                     |          |                         |       |     |                                                                                           |                                                                                                             |           |

| Peptide                                                | Uniq | -10lgP | Mass      | Length | ppm  | m/z       | z | RT    | Fraction | Scan     | Source File       | Area Roasted in gel | #Feature | #Feature Roasted in gel | Start | End | PTM                  | AScore                                                     | Found By  |
|--------------------------------------------------------|------|--------|-----------|--------|------|-----------|---|-------|----------|----------|-------------------|---------------------|----------|-------------------------|-------|-----|----------------------|------------------------------------------------------------|-----------|
| R.LNAQRPDNRIESEGGYIETWN(+.98)PNNQEFQC(+57.02)AGVALSR.T | Y    | 29.65  | 4133.9248 | 36     | -0.7 | 1034.4878 | 4 | 43.56 | 39       | F39:2183 | OB5952 H3A Ro.raw | 0                   | 0        | 0                       | 37    | 72  | Carbamidomethylation | 0                                                          | PEAKS DB  |
| K.TDSRPSIAN(+.98)LAGEN(+.98)SIIDNLPEEVANSYR.L          | Y    | 29.26  | 3245.5686 | 30     | 4.2  | 1082.8680 | 3 | 47.69 | 29       | F29:2306 | OB5922 H2 Ro.raw  | 0                   | 0        | 0                       | 452   | 481 |                      | N21:Deamidation (NQ):7.58;C29:Carbamidomethylation:1000.00 | PEAKS DB  |
| K.AQSENYE(+21.98)YLAFK.T                               | Y    | 28.80  | 1483.6595 | 12     | -1.5 | 742.8359  | 2 | 31.58 | 35       | F35:1513 | OB5946 H2 Ro.raw  | 8.2984E3            | 1        | 1                       | 440   | 451 |                      | E7:Sodium adduct:0.00                                      | PEAKS PTM |
| R.LNAQRPDN(+.98)RIESEGGYIETWNPNNQEFQC(+57.02)AGVALSR.T | Y    | 28.37  | 4133.9248 | 36     | 5.5  | 1034.4941 | 4 | 34.29 | 31       | F31:1691 | OB5942 H6 Ro.raw  | 0                   | 0        | 0                       | 37    | 72  | Carbamidomethylation | N8:Deamidation (NQ):0.00;C29:Carbamidomethylation:1000.00  | PEAKS DB  |
| total 54 peptides                                      |      |        |           |        |      |           |   |       |          |          |                   |                     |          |                         |       |     |                      |                                                            |           |

082580|082580\_ARAHY

back to list

Protein Coverage | Supporting Peptides |

Protein Coverage:

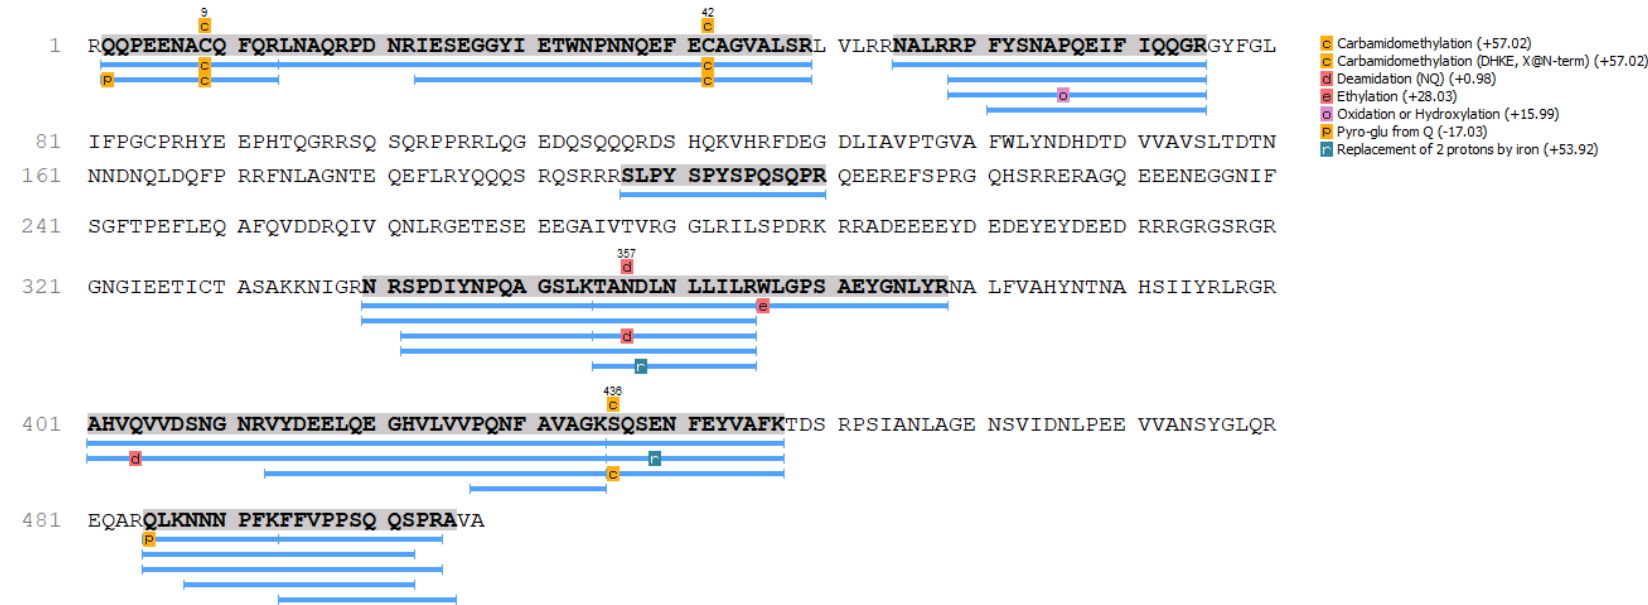

Supporting Peptides:

| Peptide                        | Uniq | -10lgP | Mass      | Length | ppm  | m/z      | z | RT    | Fraction | Scan     | Source File      | Area Roasted in gel | #Feature | #Feature Roasted in gel | Start | End | PTM | AScore | Found By |
|--------------------------------|------|--------|-----------|--------|------|----------|---|-------|----------|----------|------------------|---------------------|----------|-------------------------|-------|-----|-----|--------|----------|
| R.SPDIYNPQAGSLKTANDLNLLILR.W   | N    | 136.50 | 2625.4126 | 24     | -0.1 | 876.1447 | 3 | 35.61 | 29       | F29:1607 | OB5922 H2 Ro.raw | 1.276E6             | 3        | 3                       | 342   | 365 |     |        | PEAKS DB |
| R.NRSPDIYNPQAGSLKTANDLNLLILR.W | N    | 120.82 | 2895.5566 | 26     | 1.6  | 966.1943 | 3 | 34.35 | 29       | F29:1530 | OB5922 H2 Ro.raw | 2.2791E6            | 6        | 6                       | 340   | 365 |     |        | PEAKS DB |
| total 45 peptides              |      |        |           |        |      |          |   |       |          |          |                  |                     |          |                         |       |     |     |        |          |

| Peptide                                          | Uniq | -10lgP | Mass      | Length | ppm  | m/z       | z | RT    | Fraction | Scan     | Source File             | Area Roasted in gel | #Feature | #Feature Roasted in gel | Start | End | PTM                                      | AScore                                                                | Found By     |
|--------------------------------------------------|------|--------|-----------|--------|------|-----------|---|-------|----------|----------|-------------------------|---------------------|----------|-------------------------|-------|-----|------------------------------------------|-----------------------------------------------------------------------|--------------|
| K.SQSENFYVAFK.T                                  | N    | 116.27 | 1447.6619 | 12     | 3.0  | 724.8404  | 2 | 31.51 | 34       | F34:1498 | OB5945<br>H2<br>Ro.raw  | 1.8189E7            | 10       | 10                      | 436   | 447 |                                          |                                                                       | PEAKS<br>DB  |
| R.RPFYSNAPQEIFIQQGR.G                            | N    | 110.90 | 2050.0383 | 17     | 3.2  | 684.3556  | 3 | 31.52 | 38       | F38:1483 | OB5951<br>H3A<br>Ro.raw | 9.1631E6            | 15       | 15                      | 59    | 75  |                                          |                                                                       | PEAKS<br>DB  |
| R.NALRRPFYSNAPQEIFIQQGR.G                        | N    | 97.93  | 2504.3037 | 21     | 1.0  | 835.7760  | 3 | 32.71 | 40       | F40:1535 | OB5953<br>H3A<br>Ro.raw | 6.3111E6            | 14       | 13                      | 55    | 75  |                                          |                                                                       | PEAKS<br>DB  |
| R.NRSPDIYNPQAGSLK.T                              | N    | 96.54  | 1658.8376 | 15     | 0.1  | 830.4261  | 2 | 27.65 | 32       | F32:1291 | OB5943<br>H6<br>Ro.raw  | 8.0621E5            | 12       | 12                      | 340   | 354 |                                          |                                                                       | PEAKS<br>DB  |
| R.SPDIYNPQAGSLK.T                                | N    | 92.16  | 1388.6936 | 13     | 1.7  | 695.3552  | 2 | 28.58 | 34       | F34:1323 | OB5945<br>H2<br>Ro.raw  | 1.33E6              | 6        | 6                       | 342   | 354 |                                          |                                                                       | PEAKS<br>DB  |
| R.VYDEELQEGHVLVVPQNFAVAGK.S                      | N    | 90.91  | 2540.2910 | 23     | 1.4  | 847.7721  | 3 | 33.42 | 29       | F29:1478 | OB5922<br>H2<br>Ro.raw  | 1.9062E6            | 10       | 10                      | 413   | 435 |                                          |                                                                       | PEAKS<br>DB  |
| R.AHVQVVDNSGNRVYDEELQEGHVLVVPQNFAVAGK.S          | N    | 77.75  | 3816.9182 | 35     | 3.6  | 955.2402  | 4 | 32.32 | 35       | F35:1544 | OB5946<br>H2<br>Ro.raw  | 8.2893E6            | 8        | 8                       | 401   | 435 |                                          |                                                                       | PEAKS<br>DB  |
| R.Q(-17.03)QPEENAC(+57.02)QFQR.L                 | N    | 75.52  | 1516.6365 | 12     | 2.5  | 759.3274  | 2 | 28.03 | 32       | F32:1319 | OB5943<br>H6<br>Ro.raw  | 7.279E3             | 2        | 2                       | 2     | 13  | Pyro-glu from Q;<br>Carbamidomethylation | Q1:Pyro-glu from<br>Q:1000.00;C8:Carb<br>amidomethylation:<br>1000.00 | PEAKS<br>PTM |
| V.PQNFAVAGK.S                                    | N    | 75.51  | 930.4923  | 9      | 1.0  | 466.2539  | 2 | 32.32 | 35       | F35:1542 | OB5946<br>H2<br>Ro.raw  | 3.3444E6            | 3        | 3                       | 427   | 435 |                                          |                                                                       | PEAKS<br>DB  |
| R.IESEGGYIETWNPNNQEFEC(+57.02)AGVALSR.L          | N    | 74.31  | 3069.3774 | 27     | 1.4  | 1024.1345 | 3 | 34.50 | 31       | F31:1703 | OB5942<br>H6<br>Ro.raw  | 1.0361E4            | 1        | 1                       | 23    | 49  | Carbamidomethylation                     | C20:Carbamidom<br>ethylation:1000.0<br>0                              | PEAKS<br>DB  |
| K.TANDLNLILR.W                                   | N    | 73.94  | 1254.7296 | 11     | 1.8  | 628.3732  | 2 | 34.79 | 35       | F35:1750 | OB5946<br>H2<br>Ro.raw  | 1.0437E7            | 10       | 10                      | 355   | 365 |                                          |                                                                       | PEAKS<br>DB  |
| R.QQPEENAC(+57.02)QFQR.L                         | N    | 73.76  | 1533.6630 | 12     | 1.7  | 767.8400  | 2 | 25.24 | 32       | F32:1157 | OB5943<br>H6<br>Ro.raw  | 3.7544E4            | 3        | 3                       | 2     | 13  | Carbamidomethylation                     | C8:Carbamidomet<br>hylation:1000.00                                   | PEAKS<br>DB  |
| K.FFVPPSQQSPR.A                                  | N    | 69.38  | 1288.6564 | 11     | 0.2  | 645.3356  | 2 | 28.58 | 32       | F32:1346 | OB5943<br>H6<br>Ro.raw  | 2.1108E5            | 5        | 5                       | 494   | 504 |                                          |                                                                       | PEAKS<br>DB  |
| R.W(+28.03)LGPSAEYGNLYR.N                        | Y    | 66.95  | 1552.7673 | 13     | 1.8  | 777.3923  | 2 | 35.72 | 35       | F35:1749 | OB5946<br>H2<br>Ro.raw  | 3.3176E6            | 6        | 6                       | 366   | 378 | Ethylation                               | W1:Ethylation:51.<br>01                                               | PEAKS<br>PTM |
| K.S(+57.02)QSENFYVAFK.T                          | N    | 65.89  | 1504.6833 | 12     | 0.0  | 753.3489  | 2 | 31.77 | 35       | F35:1521 | OB5946<br>H2<br>Ro.raw  | 4.3047E5            | 3        | 3                       | 436   | 447 | Carbamidomethylation<br>(DHKE, X@N-term) | S1:Carbamidomet<br>hylation (DHKE, X<br>@N-term):56.34                | PEAKS<br>PTM |
| R.S(+57.02)PDIYNPQAGSLKTANDLNLILR.W              | N    | 64.15  | 2682.4341 | 24     | 1.5  | 895.1533  | 3 | 35.28 | 34       | F34:1735 | OB5945<br>H2<br>Ro.raw  | 9.5441E4            | 1        | 1                       | 342   | 365 |                                          | S1:Carbamidomet<br>hylation (DHKE, X<br>@N-term):14.04                | PEAKS<br>PTM |
| R.AHVQVVDNSN(+.98)GNRVYDEELQEGHVLVVPQNFAVAGK.S   | N    | 64.02  | 3817.9023 | 35     | 5.0  | 955.4877  | 4 | 33.04 | 29       | F29:1438 | OB5922<br>H2<br>Ro.raw  | 1.4175E6            | 2        | 2                       | 401   | 435 |                                          | N9:Deamidation<br>(NQ):9.40                                           | PEAKS<br>DB  |
| R.LNAQRPDNRIESEGGYIETWNPNNQEFEC(+57.02)AGVALSR.L | N    | 60.14  | 4133.9248 | 36     | 2.4  | 1034.4910 | 4 | 33.87 | 33       | F33:1670 | OB5944<br>H6<br>Ro.raw  | 1.5556E6            | 3        | 3                       | 14    | 49  | Carbamidomethylation                     | C29:Carbamidom<br>ethylation:1000.0<br>0                              | PEAKS<br>DB  |
| P.FYSNAPQEIFIQQGR.G                              | N    | 59.30  | 1796.8845 | 15     | -1.2 | 899.4484  | 2 | 32.27 | 31       | F31:1574 | OB5942<br>H6<br>Ro.raw  | 0                   | 0        | 0                       | 61    | 75  |                                          |                                                                       | PEAKS<br>DB  |
| R.Q(-17.03)LKNNNPFK.F                            | N    | 56.41  | 1084.5665 | 9      | 1.6  | 543.2914  | 2 | 28.75 | 34       | F34:1346 | OB5945<br>H2<br>Ro.raw  | 1.0606E4            | 2        | 2                       | 485   | 493 | Pyro-glu from Q                          | Q1:Pyro-glu from<br>Q:1000.00                                         | PEAKS<br>PTM |
| K.SQSENF(+21.98)YVAFK.T                          | N    | 54.92  | 1469.6438 | 12     | -1.1 | 735.8284  | 2 | 31.92 | 29       | F29:1388 | OB5922<br>H2<br>Ro.raw  | 6.4574E4            | 2        | 2                       | 436   | 447 |                                          | E7:Sodium adduc<br>t:14.84                                            | PEAKS<br>PTM |
| R.AHVQVVDNSGN(+.98)RVYDEELQEGHVLVVPQNFAVAGK.S    | N    | 54.09  | 3817.9023 | 35     | 3.2  | 955.4859  | 4 | 32.51 | 34       | F34:1567 | OB5945<br>H2<br>Ro.raw  | 7.3088E4            | 3        | 3                       | 401   | 435 |                                          | N11:Deamidation<br>(NQ):8.22                                          | PEAKS<br>DB  |
| total 45 peptides                                |      |        |           |        |      |           |   |       |          |          |                         |                     |          |                         |       |     |                                          |                                                                       |              |

| Peptide                                               | Uniq | -10lgP | Mass      | Length | ppm  | m/z       | z | RT    | Fraction | Scan     | Source File             | Area Roasted in gel | #Feature | #Feature Roasted in gel | Start | End | PTM                              | AScore                                                     | Found By     |
|-------------------------------------------------------|------|--------|-----------|--------|------|-----------|---|-------|----------|----------|-------------------------|---------------------|----------|-------------------------|-------|-----|----------------------------------|------------------------------------------------------------|--------------|
| K.SQS(-18.01)ENFEYVAFK.T                              | N    | 53.31  | 1429.6514 | 12     | 1.9  | 715.8344  | 2 | 31.92 | 29       | F29:1380 | OB5922<br>H2<br>Ro.raw  | 3.0777E4            | 1        | 1                       | 436   | 447 |                                  | S3:Dehydration:14.04                                       | PEAKS<br>PTM |
| R.IESEGYYIETWNPNNQ(+.98)EFEC(+57.02)AGVALSR.L         | N    | 52.73  | 3070.3613 | 27     | 6.0  | 1024.4672 | 3 | 34.92 | 32       | F32:1736 | OB5943<br>H6<br>Ro.raw  | 6.6817E3            | 1        | 1                       | 23    | 49  | Carbamidomethylation             | Q16:Deamidation (NQ):0.00;C20:Carbamidomethylation:1000.00 | PEAKS<br>DB  |
| K.SQSE(+21.98)NFEYVAFK.T                              | N    | 51.89  | 1469.6438 | 12     | -0.6 | 735.8287  | 2 | 31.51 | 34       | F34:1513 | OB5945<br>H2<br>Ro.raw  | 2.7649E4            | 1        | 1                       | 436   | 447 |                                  | E4:Sodium adduct:0.00                                      | PEAKS<br>PTM |
| K.FFVPPSQSQSPRA.V                                     | N    | 51.84  | 1359.6935 | 12     | 1.1  | 680.8547  | 2 | 29.14 | 32       | F32:1381 | OB5943<br>H6<br>Ro.raw  | 3.8841E4            | 2        | 2                       | 494   | 505 |                                  |                                                            | PEAKS<br>DB  |
| R.VYDEELQEGHVLVVPQN(+.98)FAVAGK.S                     | N    | 51.23  | 2541.2751 | 23     | 9.5  | 1271.6569 | 2 | 32.92 | 31       | F31:1618 | OB5942<br>H6<br>Ro.raw  | 3.629E3             | 1        | 1                       | 413   | 435 |                                  | N17:Deamidation (NQ):14.02                                 | PEAKS<br>DB  |
| K.TAN(+.98)DLNLLILR.W                                 | N    | 50.73  | 1255.7136 | 11     | 2.6  | 628.8657  | 2 | 35.22 | 31       | F31:1745 | OB5942<br>H6<br>Ro.raw  | 0                   | 0        | 0                       | 355   | 365 | Deamidation (NQ)                 | N3:Deamidation (NQ):68.31                                  | PEAKS<br>DB  |
| R.S(+57.02)PDYNPQAGSLK.T                              | N    | 50.29  | 1445.7150 | 13     | 5.7  | 723.8689  | 2 | 28.94 | 34       | F34:1350 | OB5945<br>H2<br>Ro.raw  | 6.4489E3            | 2        | 2                       | 342   | 354 |                                  | S1:Carbamidomethylation (DHKE, X@N-term):14.04             | PEAKS<br>PTM |
| R.SPD(+57.02)IYNPQAGSLK.T                             | N    | 45.16  | 1445.7150 | 13     | 2.2  | 723.8663  | 2 | 29.51 | 29       | F29:1244 | OB5922<br>H2<br>Ro.raw  | 0                   | 0        | 0                       | 342   | 354 |                                  | D3:Carbamidomethylation (DHKE, X@N-term):0.00              | PEAKS<br>PTM |
| R.QLKNNNPFKFFVPPSQQS.P                                | N    | 42.33  | 2119.0850 | 18     | 1.9  | 707.3703  | 3 | 33.27 | 35       | F35:1604 | OB5946<br>H2<br>Ro.raw  | 6.7737E4            | 1        | 1                       | 485   | 502 |                                  |                                                            | PEAKS<br>DB  |
| K.SQSE(+53.92)NFEYVAFK.T                              | N    | 42.20  | 1501.5812 | 12     | -2.3 | 751.7961  | 2 | 31.58 | 35       | F35:1507 | OB5946<br>H2<br>Ro.raw  | 9.4575E4            | 1        | 1                       | 436   | 447 | Replacement of 2 protons by iron | E4:Replacement of 2 protons by iron:34.87                  | PEAKS<br>PTM |
| K.NNNPFKFFVPPSQQS.P                                   | N    | 41.33  | 1749.8474 | 15     | 1.0  | 875.9319  | 2 | 34.91 | 29       | F29:1573 | OB5922<br>H2<br>Ro.raw  | 4.7342E4            | 1        | 1                       | 488   | 502 |                                  |                                                            | PEAKS<br>DB  |
| R.AHVQVVDNSNGNRVYDEELQ(+.98)EGHVLVVPQNFAVAGK.S        | N    | 40.20  | 3817.9023 | 35     | 7.9  | 955.4904  | 4 | 33.43 | 35       | F35:1615 | OB5946<br>H2<br>Ro.raw  | 0                   | 0        | 0                       | 401   | 435 |                                  | Q19:Deamidation (NQ):4.91                                  | PEAKS<br>DB  |
| R.AHVQVVDN(+.98)GN(+.98)RVYDEELQEGHVLVVPQNFAVAGK.S    | N    | 39.19  | 3818.8862 | 35     | 8.6  | 955.7371  | 4 | 34.33 | 32       | F32:1692 | OB5943<br>H6<br>Ro.raw  | 0                   | 0        | 0                       | 401   | 435 |                                  | N9:Deamidation (NQ):0.00;N11:Deamidation (NQ):0.00         | PEAKS<br>DB  |
| K.TAND(+53.92)LNLLILR.W                               | N    | 38.76  | 1308.6488 | 11     | 0.2  | 655.3318  | 2 | 35.09 | 29       | F29:1584 | OB5922<br>H2<br>Ro.raw  | 8.7715E4            | 1        | 1                       | 355   | 365 | Replacement of 2 protons by iron | D4:Replacement of 2 protons by iron:55.73                  | PEAKS<br>PTM |
| R.AHVQ(+.98)VVDNSNGNRVYDEELQEGHVLVVPQNFAVAGK.S        | N    | 38.57  | 3817.9023 | 35     | 0.9  | 955.4838  | 4 | 33.12 | 31       | F31:1624 | OB5942<br>H6<br>Ro.raw  | 4.5408E4            | 1        | 1                       | 401   | 435 | Deamidation (NQ)                 | Q4:Deamidation (NQ):21.59                                  | PEAKS<br>DB  |
| R.SLPSPYSYP(+31.99)QSQPR.Q                            | N    | 36.19  | 1637.7686 | 14     | 3.2  | 819.8942  | 2 | 27.07 | 38       | F38:1250 | OB5951<br>H3A<br>Ro.raw | 6.6096E3            | 1        | 1                       | 197   | 210 |                                  | P9:Dihydroxy:9.42                                          | PEAKS<br>PTM |
| R.RPFYSNAP(+15.99)QEIFIQQR.G                          | N    | 33.55  | 2066.0332 | 17     | 0.2  | 689.6852  | 3 | 31.94 | 40       | F40:1497 | OB5953<br>H3A<br>Ro.raw | 4.3282E4            | 1        | 1                       | 59    | 75  | Oxidation or Hydroxylation       | P8:Oxidation or Hydroxylation:32.28                        | PEAKS<br>PTM |
| R.AHVQ(+.98)VVDNSNGNRVYDEELQEGHVLVVPQ(+.98)NFAVAGK.S  | N    | 33.38  | 3818.8862 | 35     | 8.9  | 955.7373  | 4 | 33.12 | 31       | F31:1624 | OB5942<br>H6<br>Ro.raw  | 3.8034E4            | 1        | 1                       | 401   | 435 |                                  | Q4:Deamidation (NQ):8.81;Q28:Deamidation (NQ):12.28        | PEAKS<br>DB  |
| R.IESEGYYIETWN(+.98)PNNQEFEC(+57.02)AGVALSR.L         | N    | 32.58  | 3070.3613 | 27     | 6.9  | 1536.1985 | 2 | 34.73 | 32       | F32:1729 | OB5943<br>H6<br>Ro.raw  | 2.6575E4            | 1        | 1                       | 23    | 49  | Carbamidomethylation             | N12:Deamidation (NQ):0.00;C20:Carbamidomethylation:1000.00 | PEAKS<br>DB  |
| R.QLKNNNPFKFFVPPSQSQSPR.A                             | N    | 31.56  | 2372.2388 | 20     | 0.5  | 791.7539  | 3 | 33.17 | 29       | F29:1463 | OB5922<br>H2<br>Ro.raw  | 0                   | 0        | 0                       | 485   | 504 |                                  |                                                            | PEAKS<br>DB  |
| R.LNAQRPDNRIESEGYYIETWNPNN(+.98)QEFC(+57.02)AGVALSR.L | N    | 29.77  | 4134.9087 | 36     | 4.7  | 1379.3167 | 3 | 33.85 | 33       | F33:1671 | OB5944<br>H6<br>Ro.raw  | 8.0788E4            | 1        | 1                       | 14    | 49  | Carbamidomethylation             | N24:Deamidation (NQ):0.00;C29:Carbamidomethylation:1000.00 | PEAKS<br>DB  |
| total 45 peptides                                     |      |        |           |        |      |           |   |       |          |          |                         |                     |          |                         |       |     |                                  |                                                            |              |

E9LFE8|E9LFE8\_ARAHY

back to list

| Protein Coverage | Supporting Peptides |

Protein Coverage:

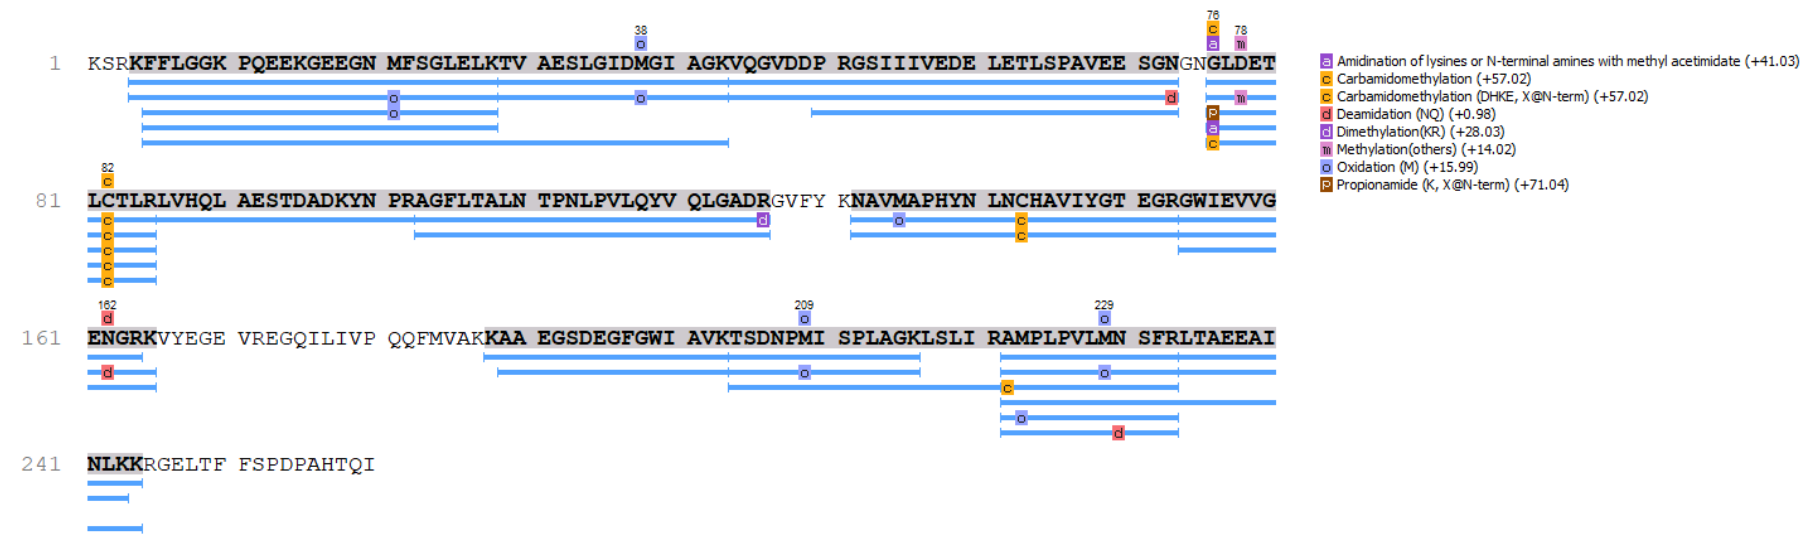

Supporting Peptides:

| Peptide                              | Uniq | -10lgP | Mass      | Length | ppm  | m/z       | z | RT    | Fraction | Scan     | Source File       | Area Roasted in gel | #Feature | #Feature Roasted in gel | Start | End | PTM                  | AScore                          | Found By  |
|--------------------------------------|------|--------|-----------|--------|------|-----------|---|-------|----------|----------|-------------------|---------------------|----------|-------------------------|-------|-----|----------------------|---------------------------------|-----------|
| K.KAAEGSDEGFGWIAVK.T                 | Y    | 124.05 | 1663.8206 | 16     | 2.8  | 832.9199  | 2 | 32.11 | 29       | F29:1402 | OB5922 H2 Ro.raw  | 5.9962E5            | 5        | 5                       | 188   | 203 |                      |                                 | PEAKS DB  |
| K.AAEGSDEGFGWIAVK.T                  | Y    | 123.90 | 1535.7256 | 15     | 3.4  | 768.8727  | 2 | 33.97 | 29       | F29:1512 | OB5922 H2 Ro.raw  | 4.1372E6            | 7        | 7                       | 189   | 203 |                      |                                 | PEAKS DB  |
| R.AGFLTALNTPNLPVLQYVQLGADR(+28.03).G | Y    | 116.09 | 2598.4170 | 24     | 4.1  | 1300.2211 | 2 | 40.36 | 29       | F29:1874 | OB5922 H2 Ro.raw  | 8.9656E6            | 11       | 11                      | 103   | 126 | Dimethylation(KR)    | R24:Dimethylation(KR):1000.00   | PEAKS PTM |
| K.TVAESLGIDMGIAGK.V                  | Y    | 112.09 | 1460.7544 | 15     | -1.6 | 731.3852  | 2 | 33.39 | 30       | F30:1455 | OB5926 H3B Ro.raw | 1.9292E5            | 4        | 4                       | 29    | 43  |                      |                                 | PEAKS DB  |
| R.AMPLPVLMSFR.L                      | Y    | 107.77 | 1374.7152 | 12     | 1.6  | 688.3660  | 2 | 36.22 | 34       | F34:1784 | OB5945 H2 Ro.raw  | 4.2293E6            | 6        | 6                       | 222   | 233 |                      |                                 | PEAKS DB  |
| R.AMPLPVL(+15.99)NSFR.L              | Y    | 101.69 | 1390.7101 | 12     | 2.1  | 696.3638  | 2 | 34.40 | 29       | F29:1535 | OB5922 H2 Ro.raw  | 4.2221E5            | 2        | 2                       | 222   | 233 | Oxidation (M)        | M8:Oxidation (M):146.62         | PEAKS DB  |
| R.GWIEVVGENGK.K                      | Y    | 99.75  | 1214.6044 | 11     | 0.0  | 608.3094  | 2 | 31.76 | 35       | F35:1523 | OB5946 H2 Ro.raw  | 6.5203E4            | 2        | 2                       | 154   | 164 |                      |                                 | PEAKS DB  |
| K.TSDNPMISPLAGK.L                    | Y    | 97.69  | 1329.6598 | 13     | 1.5  | 665.8381  | 2 | 30.34 | 29       | F29:1281 | OB5922 H2 Ro.raw  | 4.6762E5            | 5        | 5                       | 204   | 216 |                      |                                 | PEAKS DB  |
| R.KFFLGGKPQEEKGEEGNMFSGLELK.T        | N    | 95.61  | 2798.3948 | 25     | -0.5 | 933.8075  | 3 | 36.62 | 30       | F30:1634 | OB5926 H3B Ro.raw | 2.112E5             | 1        | 1                       | 4     | 28  |                      |                                 | PEAKS DB  |
| K.TVAESLGIDM(+15.99)GIAGK.V          | Y    | 91.50  | 1476.7494 | 15     | -2.7 | 739.3818  | 2 | 30.86 | 30       | F30:1309 | OB5926 H3B Ro.raw | 3.516E3             | 1        | 1                       | 29    | 43  | Oxidation (M)        | M10:Oxidation (M):1000.00       | PEAKS DB  |
| N.GLDETL(+57.02)TLR.L                | Y    | 89.29  | 1176.5808 | 10     | 0.9  | 589.2982  | 2 | 30.78 | 34       | F34:1456 | OB5945 H2 Ro.raw  | 4.2059E5            | 3        | 3                       | 76    | 85  | Carbamidomethylation | C7:Carbamidomethylation:1000.00 | PEAKS DB  |
| total 36 peptides                    |      |        |           |        |      |           |   |       |          |          |                   |                     |          |                         |       |     |                      |                                 |           |

| Peptide                                    | Uniq | ~10lgP | Mass      | Length | ppm  | m/z       | z | RT    | Fraction | Scan     | Source File       | Area Roasted in gel | #Feature | #Feature Roasted in gel | Start | End | PTM                                                         | AScore                                                                         | Found By  |
|--------------------------------------------|------|--------|-----------|--------|------|-----------|---|-------|----------|----------|-------------------|---------------------|----------|-------------------------|-------|-----|-------------------------------------------------------------|--------------------------------------------------------------------------------|-----------|
| K.NAVMAPHYNLNC(+57.02)HAVIYGTEGR.G         | Y    | 85.03  | 2486.1582 | 22     | 1.2  | 829.7277  | 3 | 31.22 | 35       | F35:1485 | OB5946 H2 Ro.raw  | 3.5159E5            | 2        | 2                       | 132   | 153 | Carbamidomethylation                                        | C12:Carbamidomethylation:1000.00                                               | PEAKS DB  |
| K.FFLGGKPQEEKGEEGNMFSGLELK.T               | N    | 83.26  | 2670.2998 | 24     | -0.7 | 891.1088  | 3 | 36.43 | 30       | F30:1612 | OB5926 H3B Ro.raw | 1.0891E6            | 5        | 5                       | 5     | 28  |                                                             |                                                                                | PEAKS DB  |
| K.VQGVDDPRGSIIVEDELETLSPAVEESGN.G          | Y    | 78.33  | 3166.5518 | 30     | 4.3  | 1584.2899 | 2 | 39.16 | 36       | F36:1927 | OB5948 H3B Ro.raw | 1.8789E6            | 3        | 3                       | 44    | 73  |                                                             |                                                                                | PEAKS DB  |
| K.TSDNPM(+15.99)ISPLAGK.L                  | Y    | 77.31  | 1345.6548 | 13     | -1.4 | 673.8337  | 2 | 27.49 | 34       | F34:1267 | OB5945 H2 Ro.raw  | 8.6931E3            | 3        | 3                       | 204   | 216 | Oxidation (M)                                               | M6:Oxidation (M):1000.00                                                       | PEAKS DB  |
| K.TSDNPMISPLAGKLSLIR.A                     | Y    | 76.06  | 1912.0452 | 18     | -0.1 | 638.3556  | 3 | 34.16 | 29       | F29:1525 | OB5922 H2 Ro.raw  | 1.9762E5            | 2        | 2                       | 204   | 221 |                                                             |                                                                                | PEAKS DB  |
| R.LTAEEAINK.K                              | Y    | 71.99  | 1100.6077 | 10     | 1.8  | 551.3121  | 2 | 29.67 | 34       | F34:1400 | OB5945 H2 Ro.raw  | 2.6983E4            | 3        | 3                       | 234   | 243 |                                                             |                                                                                | PEAKS DB  |
| R.GWIEVVGEN(+.98)GRK.V                     | Y    | 65.81  | 1343.6833 | 12     | 0.3  | 672.8492  | 2 | 30.41 | 34       | F34:1444 | OB5945 H2 Ro.raw  | 1.4478E4            | 1        | 1                       | 154   | 165 | Deamidation (NQ)                                            | N9:Deamidation (NQ):1000.00                                                    | PEAKS DB  |
| N.G(+57.02)LDETLC(+57.02)TLR.L             | Y    | 64.83  | 1233.6023 | 10     | 2.6  | 617.8100  | 2 | 30.88 | 34       | F34:1470 | OB5945 H2 Ro.raw  | 0                   | 0        | 0                       | 76    | 85  | Carbamidomethylation (DHKE, X@N-term); Carbamidomethylation | G1:Carbamidomethylation (DHKE, X@N-term):26.31;C7:Carbamidomethylation:1000.00 | PEAKS PTM |
| R.GWIEVVGENGK.V                            | Y    | 64.09  | 1342.6993 | 12     | 0.6  | 672.3574  | 2 | 30.50 | 35       | F35:1442 | OB5946 H2 Ro.raw  | 0                   | 0        | 0                       | 154   | 165 |                                                             |                                                                                | PEAKS DB  |
| R.AGFLTALNTNPLVLQYVQLGAD(+28.03)R.G        | Y    | 63.41  | 2598.4170 | 24     | -1.1 | 867.1453  | 3 | 39.63 | 33       | F33:2004 | OB5944 H6 Ro.raw  | 3.6606E4            | 2        | 2                       | 103   | 126 |                                                             | D23:Ethylation:8.14                                                            | PEAKS PTM |
| R.LVHQLAESTDADKYNPR.A                      | N    | 61.22  | 1955.9701 | 17     | -6.1 | 978.9863  | 2 | 30.10 | 29       | F29:1292 | OB5922 H2 Ro.raw  | 8.9618E4            | 4        | 4                       | 86    | 102 |                                                             |                                                                                | PEAKS DB  |
| N.GLD(+14.02)ETLC(+57.02)TLR.L             | Y    | 59.74  | 1190.5966 | 10     | 1.5  | 596.3065  | 2 | 30.96 | 34       | F34:1503 | OB5945 H2 Ro.raw  | 1.792E6             | 3        | 3                       | 76    | 85  | Methylation(others); Carbamidomethylation                   | D3:Methylation(others):33.98;C7:Carbamidomethylation:1000.00                   | PEAKS PTM |
| R.LTAEEAINKK.R                             | Y    | 59.42  | 1228.7026 | 11     | 1.1  | 615.3593  | 2 | 28.04 | 29       | F29:1144 | OB5922 H2 Ro.raw  | 4.2354E4            | 3        | 3                       | 234   | 244 |                                                             |                                                                                | PEAKS DB  |
| K.FFLGGKPQEEKGEEGNM(+15.99)FSGLELK.T       | N    | 58.55  | 2686.2947 | 24     | -1.0 | 896.4402  | 3 | 34.90 | 30       | F30:1542 | OB5926 H3B Ro.raw | 3.6375E5            | 2        | 2                       | 5     | 28  | Oxidation (M)                                               | M17:Oxidation (M):1000.00                                                      | PEAKS DB  |
| R.A(+57.02)MPLPVLMSFR.L                    | Y    | 56.31  | 1431.7367 | 12     | 1.5  | 716.8767  | 2 | 36.95 | 29       | F29:1692 | OB5922 H2 Ro.raw  | 1.0591E5            | 3        | 3                       | 222   | 233 | Carbamidomethylation (DHKE, X@N-term)                       | A1:Carbamidomethylation (DHKE, X@N-term):1000.00                               | PEAKS PTM |
| N.G(+71.04)LDETLC(+57.02)TLR.L             | Y    | 53.84  | 1247.6179 | 10     | 1.2  | 624.8170  | 2 | 31.22 | 35       | F35:1488 | OB5946 H2 Ro.raw  | 4.2493E4            | 2        | 2                       | 76    | 85  | Propionamide (K, X@N-term); Carbamidomethylation            | G1:Propionamide (K, X@N-term):1000.00;C7:Carbamidomethylation:1000.00          | PEAKS PTM |
| K.NAVM(+15.99)APHYNLNC(+57.02)HAVIYGTEGR.G | Y    | 52.74  | 2502.1533 | 22     | 1.1  | 835.0593  | 3 | 30.66 | 35       | F35:1454 | OB5946 H2 Ro.raw  | 9.2873E4            | 3        | 3                       | 132   | 153 | Oxidation (M); Carbamidomethylation                         | M4:Oxidation (M):1000.00;C12:Carbamidomethylation:1000.00                      | PEAKS DB  |
| K.VQGVDDPRGSIIVEDELETLSPAVEESGN(+.98).G    | Y    | 52.14  | 3167.5356 | 30     | 9.3  | 1056.8623 | 3 | 39.51 | 37       | F37:1974 | OB5949 H3B Ro.raw | 3.4995E4            | 1        | 1                       | 44    | 73  | Deamidation (NQ)                                            | N30:Deamidation (NQ):53.58                                                     | PEAKS DB  |
| R.AM(+15.99)PLPVLMSFR.L                    | Y    | 46.50  | 1390.7101 | 12     | 3.1  | 696.3645  | 2 | 34.72 | 29       | F29:1571 | OB5922 H2 Ro.raw  | 5.1224E5            | 2        | 2                       | 222   | 233 | Oxidation (M)                                               | M2:Oxidation (M):71.27                                                         | PEAKS DB  |
| D.PRGSIIVEDELETLSPAVEESGN.G                | Y    | 45.80  | 2553.2810 | 24     | 2.7  | 1277.6512 | 2 | 38.18 | 37       | F37:1893 | OB5949 H3B Ro.raw | 1.8676E5            | 2        | 2                       | 50    | 73  |                                                             |                                                                                | PEAKS DB  |
| R.AMPLVLMN(+.98)SFR.L                      | Y    | 45.50  | 1375.6992 | 12     | 1.7  | 688.8580  | 2 | 36.11 | 29       | F29:1637 | OB5922 H2 Ro.raw  | 0                   | 0        | 0                       | 222   | 233 | Deamidation (NQ)                                            | N9:Deamidation (NQ):1000.00                                                    | PEAKS DB  |
| R.AMPLVLMNSFRLTAEEAINKK.R                  | Y    | 36.82  | 2585.4072 | 23     | 2.5  | 862.8118  | 3 | 39.79 | 29       | F29:1844 | OB5922 H2 Ro.raw  | 4.4272E5            | 1        | 1                       | 222   | 244 |                                                             |                                                                                | PEAKS DB  |
| total 36 peptides                          |      |        |           |        |      |           |   |       |          |          |                   |                     |          |                         |       |     |                                                             |                                                                                |           |

| Peptide                                      | Uniq | -10lgP | Mass      | Length | ppm  | m/z       | z | RT    | Fraction | Scan     | Source File       | Area Roasted in gel | #Feature | #Feature Roasted in gel | Start | End | PTM                                                                                       | AScore                                                                                                            | Found By  |
|----------------------------------------------|------|--------|-----------|--------|------|-----------|---|-------|----------|----------|-------------------|---------------------|----------|-------------------------|-------|-----|-------------------------------------------------------------------------------------------|-------------------------------------------------------------------------------------------------------------------|-----------|
| R.KFFLGKGPQEEKGEEGNM(+15.99)FSGLELK.T        | N    | 35.69  | 2814.3896 | 25     | 1.4  | 939.1409  | 3 | 35.47 | 30       | F30:1579 | OB5926 H3B Ro.raw | 8.019E4             | 1        | 1                       | 4     | 28  | Oxidation (M)                                                                             | M18:Oxidation (M):100 0.00                                                                                        | PEAKS DB  |
| N.G(+41.03)LDETLG(+57.02)TLR.L               | Y    | 31.53  | 1217.6074 | 10     | 0.9  | 609.8115  | 2 | 31.33 | 34       | F34:1490 | OB5945 H2 Ro.raw  | 2.7231E4            | 1        | 1                       | 76    | 85  | Amidination of lysines or N-terminal amines with methyl acetimidate; Carbamidomethylation | G1:Amidination of lysine s or N-terminal amines with methyl acetimidat e:1000.00;C7:Carbamid omethylation:1000.00 | PEAKS PTM |
| K.FFLGGKGPQEEKGEEGNMFSGLELKTVAESLGIDMGIAGK.V | Y    | 29.96  | 4113.0439 | 39     | -1.9 | 1029.2689 | 4 | 40.43 | 30       | F30:1855 | OB5926 H3B Ro.raw | 1.8985E5            | 1        | 1                       | 5     | 43  |                                                                                           |                                                                                                                   | PEAKS DB  |
| total 36 peptides                            |      |        |           |        |      |           |   |       |          |          |                   |                     |          |                         |       |     |                                                                                           |                                                                                                                   |           |

sp|Q647H2|AHY3\_ARAHY

back to list

| Protein Coverage | Supporting Peptides |

Protein Coverage:

1MAKLLALSVCFCFLVLGASSVTFRQQGEENECQFQRLNAQRPDNC**IESEG**GYIETWNPNN**QEFQCAGVAL**SRFVLRRNAL

81RRPFYSNAPQEIFIYQGSYGFLIFPGCPGTFEETPIQGSEQFQRPSRHFQGDQSQSRPLDTHQKVHGFREGDLIAVPHGV

161AFWIYNDQDTDVVAISVLHTNSLHNQLDQFPR**RFNLAGKQEQEFLR**YQQRSGRQSPKGEEQEQQENEGGNVFSGFSTEF

241LSHGFQVNEDIVRNLRGENEREEQGAIVTVKGGLSILVPPEWRQSYQQPGRGDKDFNNGI**EETICTATVK**MNIGK**STSAD**

321**IYNPQAGSVRTVNELDLPILNRLGLSAEYGSIHRR**DAMFVPHYNNMANSMIYALHGGAHVQVVDNCGNRV**FDEELQEGQSI**

401**VVPQNFAVAASKQSEHFLYVAFKTN**SRASISNLAGKNSYMWNLPEDEVVAN**SYGLQYEQARQLKNNNPFTFLVPPQDSQMI**

481**RTVA**

Amidination of lysines or N-terminal amines with methyl acetimidate (+41.03)

Carbamidomethylation (+57.02)

Carbamidomethylation (DHKE, X@N-term) (+57.02)

Methylation(others) (+14.02)

Oxidation (M) (+15.99)

Supporting Peptides:

| Peptide                                        | Uniq | -10lgP | Mass      | Length | ppm  | m/z       | z | RT    | Fraction | Scan     | Source File      | Area Roasted in gel | #Feature | #Feature Roasted in gel | Start | End | PTM                  | AScore                           | Found By |
|------------------------------------------------|------|--------|-----------|--------|------|-----------|---|-------|----------|----------|------------------|---------------------|----------|-------------------------|-------|-----|----------------------|----------------------------------|----------|
| K.NSYMWNLPEDVVANSYGLQYEQAR.Q                   | Y    | 127.00 | 2846.2969 | 24     | 3.2  | 1424.1603 | 2 | 37.32 | 29       | F29:1709 | OB5922 H2 Ro.raw | 9.5352E5            | 4        | 4                       | 437   | 460 |                      |                                  | PEAKS DB |
| K.SQSEHFLYVAFK.T                               | Y    | 121.04 | 1454.7194 | 12     | 1.5  | 728.3680  | 2 | 32.30 | 29       | F29:1412 | OB5922 H2 Ro.raw | 2.2354E6            | 9        | 9                       | 412   | 423 |                      |                                  | PEAKS DB |
| R.TVNELDLPILNR.L                               | Y    | 103.51 | 1395.7721 | 12     | 2.8  | 698.8953  | 2 | 34.72 | 29       | F29:1555 | OB5922 H2 Ro.raw | 4.6895E6            | 10       | 10                      | 331   | 342 |                      |                                  | PEAKS DB |
| K.NSYM(+15.99)WNLPEDEVVAN <b>SYGLQYEQAR</b> .Q | Y    | 96.60  | 2862.2917 | 24     | 4.0  | 1432.1589 | 2 | 36.20 | 29       | F29:1647 | OB5922 H2 Ro.raw | 5.9092E4            | 2        | 2                       | 437   | 460 | Oxidation (M)        | M4:Oxidation (M):1000.00         | PEAKS DB |
| K.SQSEHFLYVAFKTN <b>SR</b> .A                  | Y    | 95.50  | 1912.9431 | 16     | 1.0  | 638.6556  | 3 | 31.92 | 29       | F29:1392 | OB5922 H2 Ro.raw | 1.6409E5            | 3        | 3                       | 412   | 427 |                      |                                  | PEAKS DB |
| N.GIEETIC(+57.02)TATVK.M                       | N    | 95.04  | 1320.6595 | 12     | -0.2 | 661.3369  | 2 | 29.91 | 29       | F29:1260 | OB5922 H2 Ro.raw | 2.5094E5            | 6        | 6                       | 299   | 310 | Carbamidomethylation | C7:Carbamidomethylation: 1000.00 | PEAKS DB |
| total 22 peptides                              |      |        |           |        |      |           |   |       |          |          |                  |                     |          |                         |       |     |                      |                                  |          |

| Peptide                                 | Uniq | ~10lgP | Mass      | Length | ppm  | m/z       | z | RT    | Fraction | Scan     | Source File             | Area Roasted in gel | #Feature | #Feature Roasted in gel | Start | End | PTM                                                                                       | AScore                                                                                                        | Found By  |
|-----------------------------------------|------|--------|-----------|--------|------|-----------|---|-------|----------|----------|-------------------------|---------------------|----------|-------------------------|-------|-----|-------------------------------------------------------------------------------------------|---------------------------------------------------------------------------------------------------------------|-----------|
| R.ASISNLAGKNSYMWNLPEDEVVANSYGLQYEQAR.Q  | Y    | 93.33  | 3687.7627 | 33     | 7.0  | 1230.2701 | 3 | 36.76 | 29       | F29:1683 | OB5922<br>H2<br>Ro.raw  | 3.0022E5            | 3        | 3                       | 428   | 460 |                                                                                           |                                                                                                               | PEAKS DB  |
| R.LGLSAEYGSIH.R.D                       | Y    | 93.12  | 1301.6727 | 12     | 0.5  | 651.8440  | 2 | 29.26 | 35       | F35:1369 | OB5946<br>H2<br>Ro.raw  | 2.0752E5            | 6        | 6                       | 343   | 354 |                                                                                           |                                                                                                               | PEAKS DB  |
| K.STSADIYNPQAGSVR.T                     | Y    | 76.60  | 1564.7482 | 15     | -0.5 | 783.3810  | 2 | 27.48 | 32       | F32:1285 | OB5943<br>H6<br>Ro.raw  | 6.6305E4            | 6        | 6                       | 316   | 330 |                                                                                           |                                                                                                               | PEAKS DB  |
| R.VFDEELQEGQSLVVPQNFAVAAK.S             | Y    | 67.53  | 2517.2751 | 23     | 4.7  | 1259.6508 | 2 | 35.09 | 34       | F34:1723 | OB5945<br>H2<br>Ro.raw  | 7.46E4              | 3        | 3                       | 389   | 411 |                                                                                           |                                                                                                               | PEAKS DB  |
| N.G(+57.02)IETIC(+57.02)TATVK.M         | N    | 64.33  | 1377.6809 | 12     | 2.0  | 689.8491  | 2 | 30.19 | 29       | F29:1285 | OB5922<br>H2<br>Ro.raw  | 5.5841E3            | 1        | 1                       | 299   | 310 | Carbamidomethylation (DHKE, X@N-term); Carbamidomethylation                               | G1:Carbamidomethylation (DHKE, X@N-term):30.83; C7:Carbamidomethylation:1000.00                               | PEAKS PTM |
| V.PQNFAVAAK.S                           | N    | 59.75  | 944.5079  | 9      | 0.9  | 473.2617  | 2 | 32.86 | 29       | F29:1447 | OB5922<br>H2<br>Ro.raw  | 2.0461E6            | 3        | 3                       | 403   | 411 |                                                                                           |                                                                                                               | PEAKS DB  |
| R.RFNLAGKQEQLR.Y                        | Y    | 57.44  | 1734.9165 | 14     | 0.4  | 579.3130  | 3 | 31.51 | 34       | F34:1507 | OB5945<br>H2<br>Ro.raw  | 2.9508E5            | 4        | 4                       | 193   | 206 |                                                                                           |                                                                                                               | PEAKS DB  |
| R.FNLAGKQEQLR.Y                         | Y    | 56.13  | 1578.8154 | 13     | -2.4 | 790.4151  | 2 | 31.75 | 30       | F30:1357 | OB5926<br>H3B<br>Ro.raw | 0                   | 0        | 0                       | 194   | 206 |                                                                                           |                                                                                                               | PEAKS DB  |
| K.S(+57.02)QSEHFLYVAFK.T                | Y    | 49.11  | 1511.7408 | 12     | 0.6  | 756.8782  | 2 | 32.49 | 29       | F29:1431 | OB5922<br>H2<br>Ro.raw  | 4.3132E4            | 1        | 1                       | 412   | 423 |                                                                                           | S1:Carbamidomethylation (DHKE, X@N-term):9.42                                                                 | PEAKS PTM |
| R.QLKNNNPFTFLVPPQDSQMIRT.V              | Y    | 46.30  | 2587.3218 | 22     | 0.9  | 863.4487  | 3 | 35.15 | 35       | F35:1717 | OB5946<br>H2<br>Ro.raw  | 5.4546E5            | 2        | 2                       | 461   | 482 |                                                                                           |                                                                                                               | PEAKS DB  |
| K.N(+.98)SYMWNLPEDEVVANSYGLQYEQAR.Q     | Y    | 46.12  | 2847.2810 | 24     | 9.4  | 1424.6611 | 2 | 39.12 | 35       | F35:1945 | OB5946<br>H2<br>Ro.raw  | 0                   | 0        | 0                       | 437   | 460 |                                                                                           | N1:Deamidation (NQ):7.38                                                                                      | PEAKS DB  |
| N.GIETIC(+57.02)T(+14.02)ATVK.M         | N    | 42.70  | 1334.6752 | 12     | 3.2  | 668.3470  | 2 | 29.62 | 34       | F34:1395 | OB5945<br>H2<br>Ro.raw  | 7.3781E3            | 1        | 1                       | 299   | 310 | Carbamidomethylation; Methylation(others)                                                 | C7:Carbamidomethylation:1000.00;T8:Methylation(others):28.36                                                  | PEAKS PTM |
| K.NNNPFTFLVPPQDSQMIRT.V                 | Y    | 39.74  | 2218.0840 | 19     | 2.9  | 1110.0525 | 2 | 37.02 | 29       | F29:1690 | OB5922<br>H2<br>Ro.raw  | 0                   | 0        | 0                       | 464   | 482 |                                                                                           |                                                                                                               | PEAKS DB  |
| N.G(+41.03)IETIC(+57.02)TATVK.M         | N    | 36.93  | 1361.6860 | 12     | 0.7  | 681.8508  | 2 | 29.66 | 34       | F34:1390 | OB5945<br>H2<br>Ro.raw  | 1.6824E4            | 1        | 1                       | 299   | 310 | Amidination of lysines or N-terminal amines with methyl acetimidate; Carbamidomethylation | G1:Amidination of lysines or N-terminal amines with methyl acetimidate:96.48; C7:Carbamidomethylation:1000.00 | PEAKS PTM |
| K.NNNPFTFLVPPQDSQMIR.T                  | Y    | 32.90  | 2117.0364 | 18     | 2.7  | 1059.5283 | 2 | 36.76 | 29       | F29:1684 | OB5922<br>H2<br>Ro.raw  | 1.089E4             | 1        | 1                       | 464   | 481 |                                                                                           |                                                                                                               | PEAKS DB  |
| C.IESEGGYIETWPNPNQEFQC(+57.02)AGVALSR.F | N    | 30.17  | 3068.3933 | 27     | -0.9 | 1023.8041 | 3 | 34.37 | 33       | F33:1699 | OB5944<br>H6<br>Ro.raw  | 0                   | 0        | 0                       | 46    | 72  | Carbamidomethylation                                                                      | C20:Carbamidomethylation:1000.00                                                                              | PEAKS DB  |
| total 22 peptides                       |      |        |           |        |      |           |   |       |          |          |                         |                     |          |                         |       |     |                                                                                           |                                                                                                               |           |



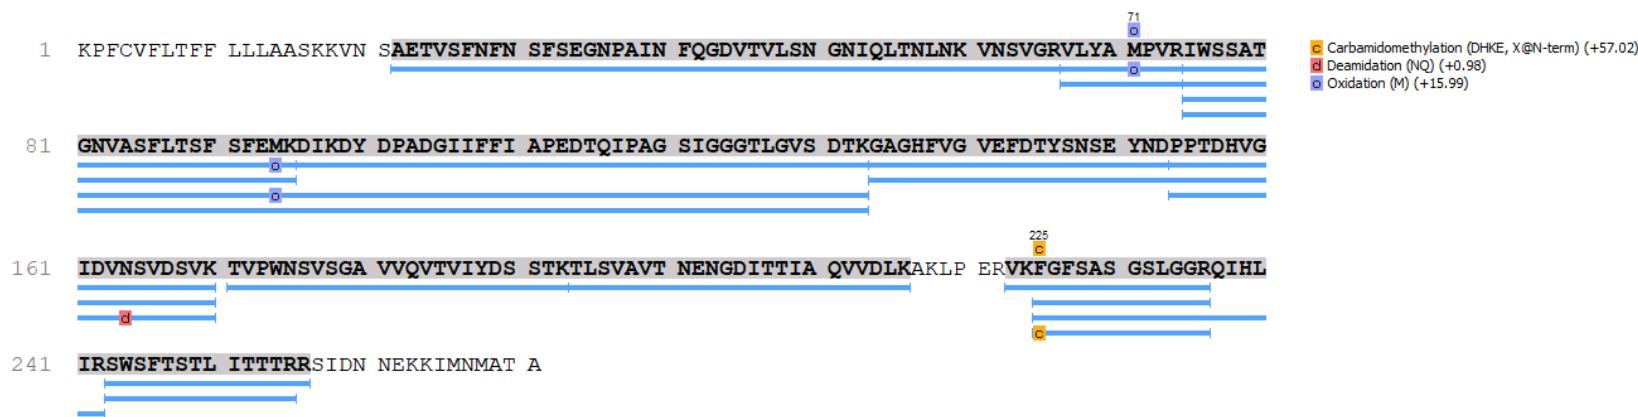

Supporting Peptides:

| Peptide                                    | Uniq | -10lgP | Mass      | Length | ppm  | m/z       | z | RT    | Fraction | Scan     | Source File       | Area Roasted in gel | #Feature | #Feature Roasted in gel | Start | End | PTM                                   | AScore                                          | Found By  |
|--------------------------------------------|------|--------|-----------|--------|------|-----------|---|-------|----------|----------|-------------------|---------------------|----------|-------------------------|-------|-----|---------------------------------------|-------------------------------------------------|-----------|
| R.SWSFTSTLITTR.R                           | N    | 125.73 | 1499.7620 | 13     | 1.0  | 750.8890  | 2 | 34.40 | 36       | F36:1663 | OB5948 H3B Ro.raw | 1.0426E6            | 6        | 6                       | 243   | 255 |                                       |                                                 | PEAKS DB  |
| R.IWSSATGNVASFLTSTFSFEMK.D                 | N    | 120.82 | 2309.1038 | 21     | 1.3  | 1155.5636 | 2 | 40.24 | 30       | F30:1850 | OB5926 H3B Ro.raw | 5.3682E5            | 3        | 3                       | 75    | 95  |                                       |                                                 | PEAKS DB  |
| K.FGFSASGSLGGR.Q                           | N    | 101.25 | 1141.5515 | 12     | -1.4 | 571.7837  | 2 | 30.73 | 30       | F30:1279 | OB5926 H3B Ro.raw | 4.8005E5            | 3        | 3                       | 225   | 236 |                                       |                                                 | PEAKS DB  |
| K.TLSVAVTNENGDIITIAQVVDLK.A                | Y    | 96.60  | 2400.2747 | 23     | 1.9  | 1201.1469 | 2 | 35.93 | 36       | F36:1752 | OB5948 H3B Ro.raw | 2.3058E5            | 4        | 4                       | 194   | 216 |                                       |                                                 | PEAKS DB  |
| R.IWSSATGNVASFLTSTFSFEM(+15.99)K.D         | N    | 96.28  | 2325.0986 | 21     | 1.5  | 1163.5583 | 2 | 38.94 | 36       | F36:1921 | OB5948 H3B Ro.raw | 4.3252E4            | 1        | 1                       | 75    | 95  | Oxidation (M)                         | M20:Oxidation (M):100.00                        | PEAKS DB  |
| D.PPTDHVGIDVNSVDSVK.T                      | N    | 90.80  | 1777.8846 | 17     | -1.8 | 593.6359  | 3 | 30.26 | 30       | F30:1269 | OB5926 H3B Ro.raw | 1.0613E6            | 9        | 9                       | 154   | 170 |                                       |                                                 | PEAKS DB  |
| K.GAGHFVGVEFDTYSNSEYND.P                   | N    | 84.78  | 2206.9080 | 20     | 2.6  | 1104.4641 | 2 | 32.88 | 36       | F36:1577 | OB5948 H3B Ro.raw | 3.4015E5            | 3        | 3                       | 134   | 153 |                                       |                                                 | PEAKS DB  |
| K.TWPWNSVSGAVVQVTVIYDSSTK.T                | Y    | 82.78  | 2436.2537 | 23     | 2.3  | 1219.1370 | 2 | 37.45 | 36       | F36:1834 | OB5948 H3B Ro.raw | 1.092E5             | 3        | 3                       | 171   | 193 |                                       |                                                 | PEAKS DB  |
| K.DIKDYDPADGIIFFIAPEDTQIPAGSIGGGTLGVSDTK.G | N    | 82.25  | 3892.9258 | 38     | 3.0  | 1298.6531 | 3 | 38.97 | 36       | F36:1923 | OB5948 H3B Ro.raw | 1.1326E6            | 3        | 3                       | 96    | 133 |                                       |                                                 | PEAKS DB  |
| R.VKFGFSASGSLGGR.Q                         | N    | 79.59  | 1368.7150 | 14     | -2.5 | 685.3648  | 2 | 31.03 | 30       | F30:1308 | OB5926 H3B Ro.raw | 2.1689E4            | 3        | 3                       | 223   | 236 |                                       |                                                 | PEAKS DB  |
| R.VLYAMPVR.I                               | N    | 77.27  | 947.5262  | 8      | 0.2  | 474.7705  | 2 | 29.80 | 36       | F36:1400 | OB5948 H3B Ro.raw | 5.0266E5            | 3        | 3                       | 67    | 74  |                                       |                                                 | PEAKS DB  |
| K.F(+57.02)GFSASGSLGGR.Q                   | N    | 67.36  | 1198.5730 | 12     | 4.0  | 600.2977  | 2 | 30.99 | 30       | F30:1312 | OB5926 H3B Ro.raw | 0                   | 0        | 0                       | 225   | 236 | Carbamidomethylation (DHKE, X@N-term) | F1:Carbamidomethylation (DHKE, X@N-term):100.00 | PEAKS PTM |
| K.GAGHFVGVEFDTYSNSEYNDPPTDHVGIDVNSVDSVK.T  | N    | 64.62  | 3966.7820 | 37     | 3.2  | 992.7060  | 4 | 33.64 | 36       | F36:1609 | OB5948 H3B Ro.raw | 3.9201E6            | 5        | 5                       | 134   | 170 |                                       |                                                 | PEAKS DB  |
| total 23 peptides                          |      |        |           |        |      |           |   |       |          |          |                   |                     |          |                         |       |     |                                       |                                                 |           |

| Peptide                                                                 | Uniq | -10lgP | Mass      | Length | ppm  | m/z       | z | RT    | Fraction | Scan     | Source File       | Area Roasted in gel | #Feature | #Feature Roasted in gel | Start | End | PTM              | AScore                                         | Found By  |
|-------------------------------------------------------------------------|------|--------|-----------|--------|------|-----------|---|-------|----------|----------|-------------------|---------------------|----------|-------------------------|-------|-----|------------------|------------------------------------------------|-----------|
| R.VLYAM(+15.99)PVR.I                                                    | N    | 53.97  | 963.5212  | 8      | -2.7 | 482.7678  | 2 | 27.52 | 30       | F30:1124 | OB5926 H3B Ro.raw | 1.3575E4            | 3        | 3                       | 67    | 74  | Oxidation (M)    | M5:Oxidation (M):100.00                        | PEAKS DB  |
| R.SWSFTSTLITTTTR.S                                                      | N    | 53.42  | 1655.8632 | 14     | 0.3  | 828.9391  | 2 | 33.07 | 36       | F36:1575 | OB5948 H3B Ro.raw | 1.4241E6            | 4        | 4                       | 243   | 256 |                  |                                                | PEAKS DB  |
| K.FGFSASGSLGGRQIHLIR.S                                                  | N    | 45.69  | 1902.0223 | 18     | -1.7 | 635.0153  | 3 | 35.47 | 30       | F30:1558 | OB5926 H3B Ro.raw | 1.7216E5            | 2        | 2                       | 225   | 242 |                  |                                                | PEAKS DB  |
| D.PPTDHVGIDVN(+.98)SVDSVK.T                                             | N    | 45.05  | 1778.8687 | 17     | 2.5  | 593.9665  | 3 | 29.71 | 30       | F30:1235 | OB5926 H3B Ro.raw | 0                   | 0        | 0                       | 154   | 170 | Deamidation (NQ) | N11:Deamidation (NQ):100.00                    | PEAKS DB  |
| R.IWSSATGNVASFLTSFSFEM(+15.99)KDIKDYDPADGIIFFIAPEDTQIPAGSIGGGTLGVSDTK.G | N    | 44.89  | 6200.0137 | 59     | 1.2  | 1551.0165 | 4 | 41.20 | 30       | F30:1895 | OB5926 H3B Ro.raw | 7.8846E5            | 1        | 1                       | 75    | 133 | Oxidation (M)    | M20:Oxidation (M):100.00                       | PEAKS DB  |
| R.IWSSATGNVASFLTSFSFEMKDIKDYDPADGIIFFIAPEDTQIPAGSIGGGTLGVSDTK.G         | N    | 41.67  | 6184.0190 | 59     | 0.9  | 1547.0173 | 4 | 42.35 | 30       | F30:1960 | OB5926 H3B Ro.raw | 8.2055E5            | 1        | 1                       | 75    | 133 |                  |                                                | PEAKS DB  |
| S.AETVSFNFNSFSEGNPAINFQGDVTVLSNGNIQLTNLNVKNSVGR.V                       | N    | 40.66  | 4812.3740 | 45     | 4.5  | 1605.1392 | 3 | 40.87 | 37       | F37:2044 | OB5949 H3B Ro.raw | 5.6245E6            | 3        | 3                       | 22    | 66  |                  |                                                | PEAKS DB  |
| R.SW(+31.99)SFTSTLITTTTR.R                                              | N    | 40.52  | 1531.7518 | 13     | 0.9  | 766.8839  | 2 | 33.45 | 36       | F36:1617 | OB5948 H3B Ro.raw | 3.3337E3            | 1        | 1                       | 243   | 255 |                  | W2:Dihydroxy:17.01                             | PEAKS PTM |
| D.P(+57.02)PTDHVGIDVNSVDSVK.T                                           | N    | 29.71  | 1834.9061 | 17     | -0.9 | 918.4595  | 2 | 30.51 | 37       | F37:1440 | OB5949 H3B Ro.raw | 0                   | 0        | 0                       | 154   | 170 |                  | P1:Carbamidomethylation (DHKE, X@N-term):19.05 | PEAKS PTM |
| S.AETVSFNFNSFSEGNPAINFQGDVTVLSNGNIQLTNLN(+.98)KVNSVGR.V                 | N    | 29.65  | 4813.3584 | 45     | 8.6  | 1204.3572 | 4 | 38.44 | 37       | F37:1904 | OB5949 H3B Ro.raw | 0                   | 0        | 0                       | 22    | 66  |                  | N38:Deamidation (NQ):0.00                      | PEAKS DB  |
| total 23 peptides                                                       |      |        |           |        |      |           |   |       |          |          |                   |                     |          |                         |       |     |                  |                                                |           |

A0A089ZXL7|A0A089ZXL7\_ARAHY

back to list

| Protein Coverage | Supporting Peptides |

Protein Coverage:

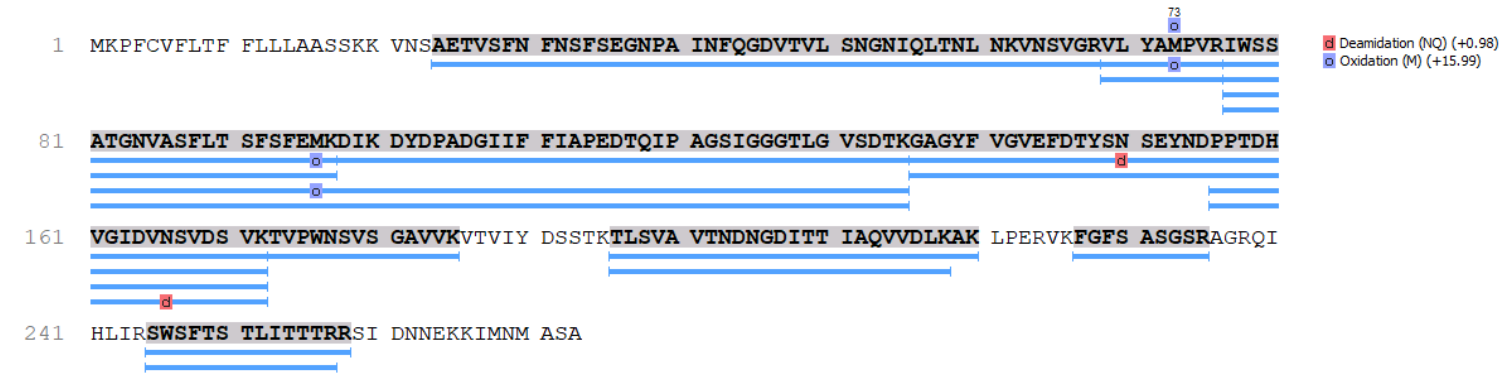

Supporting Peptides:

| Peptide | Uniq | -10lgP | Mass | Length | ppm | m/z | z | RT | Fraction | Scan | Source File | Area Roasted | #Feature | #Feature Roasted in | Start | End | PTM | AScore | Found By |
|---------|------|--------|------|--------|-----|-----|---|----|----------|------|-------------|--------------|----------|---------------------|-------|-----|-----|--------|----------|
|---------|------|--------|------|--------|-----|-----|---|----|----------|------|-------------|--------------|----------|---------------------|-------|-----|-----|--------|----------|

|                                                                         |   |        |           |    |      |           |   |       |    |          |                         | in gel   |   | gel |     |     |                     |                                                                |              |
|-------------------------------------------------------------------------|---|--------|-----------|----|------|-----------|---|-------|----|----------|-------------------------|----------|---|-----|-----|-----|---------------------|----------------------------------------------------------------|--------------|
| R.SWSFTSTLITTR.R                                                        | N | 125.73 | 1499.7620 | 13 | 1.0  | 750.8890  | 2 | 34.40 | 36 | F36:1663 | OB5948<br>H3B<br>Ro.raw | 1.0426E6 | 6 | 6   | 245 | 257 |                     |                                                                | PEAKS<br>DB  |
| R.IWSSATGNVASFLTSFSFEMK.D                                               | N | 120.82 | 2309.1038 | 21 | 1.3  | 1155.5636 | 2 | 40.24 | 30 | F30:1850 | OB5926<br>H3B<br>Ro.raw | 5.3682E5 | 3 | 3   | 77  | 97  |                     |                                                                | PEAKS<br>DB  |
| K.TLSVAVTNDNGDITIAQVVDLK.A                                              | N | 109.79 | 2386.2590 | 23 | 0.5  | 1194.1405 | 2 | 36.05 | 30 | F30:1608 | OB5926<br>H3B<br>Ro.raw | 7.7468E5 | 3 | 3   | 196 | 218 |                     |                                                                | PEAKS<br>DB  |
| R.IWSSATGNVASFLTSFSFEM(+15.99)K.D                                       | N | 96.28  | 2325.0986 | 21 | 1.5  | 1163.5583 | 2 | 38.94 | 36 | F36:1921 | OB5948<br>H3B<br>Ro.raw | 4.3252E4 | 1 | 1   | 77  | 97  | Oxidation<br>(M)    | M20:Oxidati<br>on (M):100<br>0.00                              | PEAKS<br>DB  |
| D.PPTDHVGIDVNSVDSVK.T                                                   | N | 90.80  | 1777.8846 | 17 | -1.8 | 593.6359  | 3 | 30.26 | 30 | F30:1269 | OB5926<br>H3B<br>Ro.raw | 1.0613E6 | 9 | 9   | 156 | 172 |                     |                                                                | PEAKS<br>DB  |
| K.TVPWNSVSGAVVK.V                                                       | N | 82.61  | 1342.7245 | 13 | 1.4  | 672.3705  | 2 | 30.95 | 36 | F36:1462 | OB5948<br>H3B<br>Ro.raw | 1.4738E5 | 4 | 4   | 173 | 185 |                     |                                                                | PEAKS<br>DB  |
| K.DIKDYDPADGIIFFIAPEDTQIPAGSIGGGTLGVSDTK.G                              | N | 82.25  | 3892.9258 | 38 | 3.0  | 1298.6531 | 3 | 38.97 | 36 | F36:1923 | OB5948<br>H3B<br>Ro.raw | 1.1326E6 | 3 | 3   | 98  | 135 |                     |                                                                | PEAKS<br>DB  |
| R.VLYAMPVR.I                                                            | N | 77.27  | 947.5262  | 8  | 0.2  | 474.7705  | 2 | 29.80 | 36 | F36:1400 | OB5948<br>H3B<br>Ro.raw | 5.0266E5 | 3 | 3   | 69  | 76  |                     |                                                                | PEAKS<br>DB  |
| K.FGFSASGSR.A                                                           | Y | 57.37  | 914.4246  | 9  | 0.9  | 458.2212  | 2 | 27.95 | 30 | F30:1148 | OB5926<br>H3B<br>Ro.raw | 0        | 0 | 0   | 227 | 235 |                     |                                                                | PEAKS<br>DB  |
| K.GAGYFVGVEFDTYSNSEYNDPPTDHVGIDVNSVDSVK.T                               | Y | 54.56  | 3992.7864 | 37 | -0.9 | 1331.9382 | 3 | 35.47 | 30 | F30:1682 | OB5926<br>H3B<br>Ro.raw | 6.5603E4 | 1 | 1   | 136 | 172 |                     |                                                                | PEAKS<br>DB  |
| R.VLYAM(+15.99)PVR.I                                                    | N | 53.97  | 963.5212  | 8  | -2.7 | 482.7678  | 2 | 27.52 | 30 | F30:1124 | OB5926<br>H3B<br>Ro.raw | 1.3575E4 | 3 | 3   | 69  | 76  | Oxidation<br>(M)    | M5:Oxidatio<br>n (M):1000.<br>00                               | PEAKS<br>DB  |
| R.SWSFTSTLITTRR.S                                                       | N | 53.42  | 1655.8632 | 14 | 0.3  | 828.9391  | 2 | 33.07 | 36 | F36:1575 | OB5948<br>H3B<br>Ro.raw | 1.4241E6 | 4 | 4   | 245 | 258 |                     |                                                                | PEAKS<br>DB  |
| K.TLSVAVTNDNGDITIAQVVDLKAK.L                                            | N | 50.12  | 2585.3911 | 25 | 0.9  | 862.8051  | 3 | 34.40 | 36 | F36:1665 | OB5948<br>H3B<br>Ro.raw | 1.5947E4 | 1 | 1   | 196 | 220 |                     |                                                                | PEAKS<br>DB  |
| K.TLSVAVTNDN(+.98)GDITIAQVVDLK.A                                        | N | 48.85  | 2387.2432 | 23 | -0.8 | 1194.6310 | 2 | 36.59 | 30 | F30:1638 | OB5926<br>H3B<br>Ro.raw | 0        | 0 | 0   | 196 | 218 |                     | N10:Deamid<br>ation (NQ):<br>8.22                              | PEAKS<br>DB  |
| D.PPTDHVGIDVN(+.98)SVDSVK.T                                             | N | 45.05  | 1778.8687 | 17 | 2.5  | 593.9665  | 3 | 29.71 | 30 | F30:1235 | OB5926<br>H3B<br>Ro.raw | 0        | 0 | 0   | 156 | 172 | Deamidation<br>(NQ) | N11:Deamid<br>ation (NQ):1<br>000.00                           | PEAKS<br>DB  |
| R.IWSSATGNVASFLTSFSFEM(+15.99)KDIKDYDPADGIIFFIAPEDTQIPAGSIGGGTLGVSDTK.G | N | 44.89  | 6200.0137 | 59 | 1.2  | 1551.0165 | 4 | 41.20 | 30 | F30:1895 | OB5926<br>H3B<br>Ro.raw | 7.8846E5 | 1 | 1   | 77  | 135 | Oxidation<br>(M)    | M20:Oxidati<br>on (M):100<br>0.00                              | PEAKS<br>DB  |
| R.IWSSATGNVASFLTSFSFEMKDIKDYDPADGIIFFIAPEDTQIPAGSIGGGTLGVSDTK.G         | N | 41.67  | 6184.0190 | 59 | 0.9  | 1547.0173 | 4 | 42.35 | 30 | F30:1960 | OB5926<br>H3B<br>Ro.raw | 8.2055E5 | 1 | 1   | 77  | 135 |                     |                                                                | PEAKS<br>DB  |
| S.AETVSFNFNSFSEGNPAINFQGDVTVLSNGNIQLTNLKNKNSVGR.V                       | N | 40.66  | 4812.3740 | 45 | 4.5  | 1605.1392 | 3 | 40.87 | 37 | F37:2044 | OB5949<br>H3B<br>Ro.raw | 5.6245E6 | 3 | 3   | 24  | 68  |                     |                                                                | PEAKS<br>DB  |
| R.SW(+31.99)SFTSTLITTR.R                                                | N | 40.52  | 1531.7518 | 13 | 0.9  | 766.8839  | 2 | 33.45 | 36 | F36:1617 | OB5948<br>H3B<br>Ro.raw | 3.3337E3 | 1 | 1   | 245 | 257 |                     | W2:Dihydro<br>xy:17.01                                         | PEAKS<br>PTM |
| K.GAGYFVGVEFDTYSN(+.98)SEYNDPPTDHVGIDVNSVDSVK.T                         | Y | 37.65  | 3993.7703 | 37 | 7.3  | 1332.2772 | 3 | 35.85 | 30 | F30:1577 | OB5926<br>H3B<br>Ro.raw | 2.0916E5 | 1 | 1   | 136 | 172 | Deamidation<br>(NQ) | N15:Deamid<br>ation (NQ):2<br>5.70                             | PEAKS<br>DB  |
| D.P(+57.02)PTDHVGIDVNSVDSVK.T                                           | N | 29.71  | 1834.9061 | 17 | -0.9 | 918.4595  | 2 | 30.51 | 37 | F37:1440 | OB5949<br>H3B<br>Ro.raw | 0        | 0 | 0   | 156 | 172 |                     | P1:Carbami<br>domethylati<br>on (DHKE, X<br>@N-term):1<br>9.05 | PEAKS<br>PTM |
| S.AETVSFNFNSFSEGNPAINFQGDVTVLSNGNIQLTNLN(+.98)KVNSVGR.V                 | N | 29.65  | 4813.3584 | 45 | 8.6  | 1204.3572 | 4 | 38.44 | 37 | F37:1904 | OB5949<br>H3B<br>Ro.raw | 0        | 0 | 0   | 24  | 68  |                     | N38:Deamid<br>ation (NQ):<br>0.00                              | PEAKS<br>DB  |
| total 22 peptides                                                       |   |        |           |    |      |           |   |       |    |          |                         |          |   |     |     |     |                     |                                                                |              |

A1E2B0|A1E2B0\_ARAHY

[back to list](#)

Prepared with PEAKS™ (bioinform.com)

[Protein Coverage](#) | [Supporting Peptides](#) |

Protein Coverage:

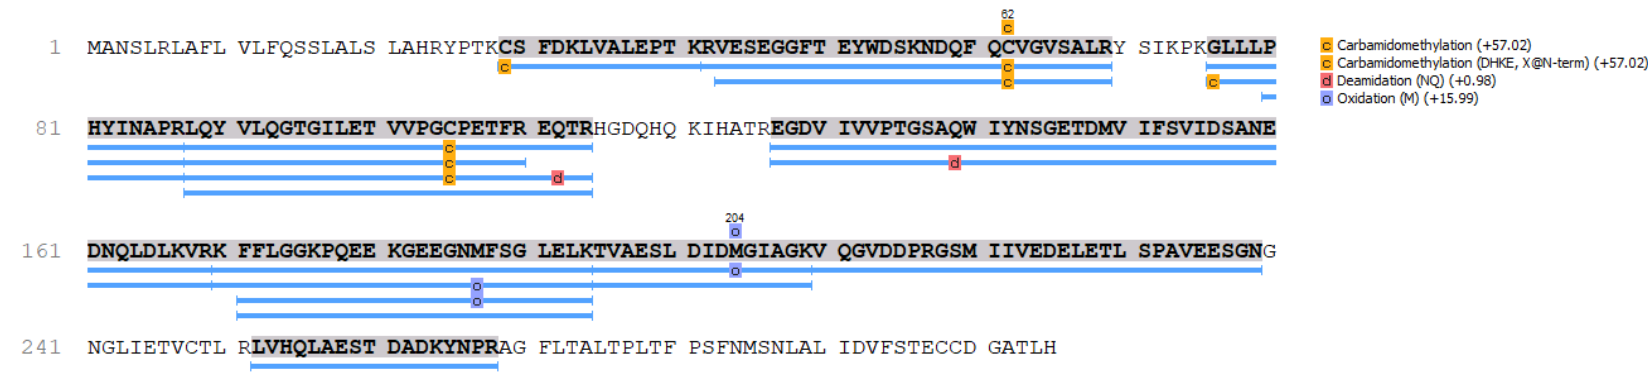

Supporting Peptides:

| Peptide                                        | Uniq | -10lgP | Mass      | Length | ppm  | m/z       | z | RT    | Fraction | Scan     | Source File       | Area Roasted in gel | #Feature | #Feature Roasted in gel | Start | End | PTM                                   | AScore                                           | Found By  |
|------------------------------------------------|------|--------|-----------|--------|------|-----------|---|-------|----------|----------|-------------------|---------------------|----------|-------------------------|-------|-----|---------------------------------------|--------------------------------------------------|-----------|
| K.TVAESLDIDMGIAGK.V                            | Y    | 117.87 | 1518.7599 | 15     | -1.7 | 760.3879  | 2 | 33.39 | 30       | F30:1446 | OB5926 H3B Ro.raw | 8.1424E4            | 2        | 2                       | 195   | 209 |                                       |                                                  | PEAKS DB  |
| K.GLLLPHYINAPR.L                               | Y    | 106.43 | 1362.7771 | 12     | 0.2  | 682.3977  | 2 | 33.21 | 30       | F30:1443 | OB5926 H3B Ro.raw | 2.2835E6            | 7        | 7                       | 76    | 87  |                                       |                                                  | PEAKS DB  |
| R.KFFLGGKPQEEKGEEGNMFSGLELK.T                  | N    | 95.61  | 2798.3948 | 25     | -0.5 | 933.8075  | 3 | 36.62 | 30       | F30:1634 | OB5926 H3B Ro.raw | 2.112E5             | 1        | 1                       | 170   | 194 |                                       |                                                  | PEAKS DB  |
| R.LQYVLQGTGILETVVPGC(+57.02)PETFR.E            | Y    | 93.70  | 2576.3308 | 23     | 3.4  | 1289.1771 | 2 | 36.71 | 36       | F36:1795 | OB5948 H3B Ro.raw | 6.8807E4            | 2        | 2                       | 88    | 110 | Carbamidomethylation                  | C18:Carbamido methylation:10 00.00               | PEAKS DB  |
| K.TVAESLDIDM(+15.99)GIAGK.V                    | Y    | 93.12  | 1534.7549 | 15     | 0.7  | 768.3872  | 2 | 30.86 | 30       | F30:1307 | OB5926 H3B Ro.raw | 5.6446E3            | 1        | 1                       | 195   | 209 | Oxidation (M)                         | M10:Oxidation (M):1000.00                        | PEAKS DB  |
| R.LQYVLQGTGILETVVPGC(+57.02)PETFREQTR.H        | Y    | 83.46  | 3090.5808 | 27     | 4.5  | 1031.2056 | 3 | 35.54 | 36       | F36:1773 | OB5948 H3B Ro.raw | 8.339E6             | 5        | 5                       | 88    | 114 | Carbamidomethylation                  | C18:Carbamido methylation:10 00.00               | PEAKS DB  |
| K.FFLGGKPQEEKGEEGNMFSGLELK.T                   | N    | 83.26  | 2670.2998 | 24     | -0.7 | 891.1088  | 3 | 36.43 | 30       | F30:1612 | OB5926 H3B Ro.raw | 1.0891E6            | 5        | 5                       | 171   | 194 |                                       |                                                  | PEAKS DB  |
| R.VESEGFT EYWDSKNDQFQC(+57.02)VGVSALR.Y        | Y    | 82.89  | 3107.3931 | 27     | 2.8  | 1036.8079 | 3 | 34.76 | 37       | F37:1692 | OB5949 H3B Ro.raw | 9.1132E5            | 3        | 3                       | 43    | 69  | Carbamidomethylation                  | C20:Carbamido methylation:10 00.00               | PEAKS DB  |
| K.RVESEGFT EYWDSKNDQFQC(+57.02)VGVSALR.Y       | Y    | 73.88  | 3263.4941 | 28     | -0.3 | 1088.8411 | 3 | 34.90 | 30       | F30:1540 | OB5926 H3B Ro.raw | 7.5628E4            | 1        | 1                       | 42    | 69  | Carbamidomethylation                  | C21:Carbamido methylation:10 00.00               | PEAKS DB  |
| K.G(+57.02)LLLPHYINAPR.L                       | Y    | 69.30  | 1419.7986 | 12     | 0.9  | 710.9072  | 2 | 32.70 | 36       | F36:1554 | OB5948 H3B Ro.raw | 1.9861E5            | 3        | 3                       | 76    | 87  | Carbamidomethylation (DHKE, X@N-term) | G1:Carbamidom ethylation (DHKE, X@N-term):7 1.64 | PEAKS PTM |
| R.LVHQLAESTDADKYNPR.A                          | N    | 61.22  | 1955.9701 | 17     | -6.1 | 978.9863  | 2 | 30.10 | 29       | F29:1292 | OB5922 H2 Ro.raw  | 8.9618E4            | 4        | 4                       | 252   | 268 |                                       |                                                  | PEAKS DB  |
| R.EGDVIVVPTGSAQWIYNSGETDMVIFSVIDSANEDNQLDKVR.K | Y    | 59.34  | 4723.2964 | 43     | 3.0  | 1575.4441 | 3 | 40.31 | 36       | F36:1999 | OB5948 H3B Ro.raw | 4.2652E5            | 2        | 2                       | 127   | 169 |                                       |                                                  | PEAKS DB  |
| K.FFLGGKPQEEKGEEGNM(+15.99)FSGLELK.T           | N    | 58.55  | 2686.2947 | 24     | -1.0 | 896.4402  | 3 | 34.90 | 30       | F30:1542 | OB5926 H3B Ro.raw | 3.6375E5            | 2        | 2                       | 171   | 194 | Oxidation (M)                         | M17:Oxidation (M):1000.00                        | PEAKS DB  |
| K.VQGVDDPRGSMIIVEDELETLSPAVEESGN.G             | Y    | 57.35  | 3184.5081 | 30     | 4.2  | 1593.2681 | 2 | 38.96 | 37       | F37:1934 | OB5949 H3B Ro.raw | 0                   | 0        | 0                       | 210   | 239 |                                       |                                                  | PEAKS DB  |
| total 21 peptides                              |      |        |           |        |      |           |   |       |          |          |                   |                     |          |                         |       |     |                                       |                                                  |           |

| Peptide                                               | Uniq | -10lgP | Mass      | Length | ppm  | m/z       | z | RT    | Fraction | Scan     | Source File       | Area Roasted in gel | #Feature | #Feature Roasted in gel | Start | End | PTM                                    | AScore                                                      | Found By  |
|-------------------------------------------------------|------|--------|-----------|--------|------|-----------|---|-------|----------|----------|-------------------|---------------------|----------|-------------------------|-------|-----|----------------------------------------|-------------------------------------------------------------|-----------|
| K.C(+57.02)SFDKLVLEPTK.R                              | Y    | 41.84  | 1506.7751 | 13     | 1.4  | 754.3959  | 2 | 31.21 | 36       | F36:1476 | OB5948 H3B Ro.raw | 0                   | 0        | 0                       | 29    | 41  | Carbamidomethylation                   | C1:Carbamidomethylation:100.0.00                            | PEAKS DB  |
| R.KFFLGKKPQEEKGEEGNM(+15.99)FSGLELK.T                 | N    | 35.69  | 2814.3896 | 25     | 1.4  | 939.1409  | 3 | 35.47 | 30       | F30:1579 | OB5926 H3B Ro.raw | 8.019E4             | 1        | 1                       | 170   | 194 | Oxidation (M)                          | M18:Oxidation (M):1000.00                                   | PEAKS DB  |
| R.EGDVIVVPTGSAQ(+.98)WIYNSGETDMVIFSVIDSANEDNQLDLKVR.K | Y    | 34.54  | 4724.2803 | 43     | 5.0  | 1575.7793 | 3 | 40.63 | 30       | F30:1862 | OB5926 H3B Ro.raw | 2.2969E5            | 1        | 1                       | 127   | 169 | Deamidation (NQ)                       | Q13:Deamidation (NQ):34.15                                  | PEAKS DB  |
| L.PHYINAPR.L                                          | Y    | 33.58  | 966.5035  | 8      | -2.2 | 484.2592  | 2 | 33.21 | 30       | F30:1450 | OB5926 H3B Ro.raw | 3.5979E4            | 2        | 2                       | 80    | 87  |                                        |                                                             | PEAKS DB  |
| R.LQYVLQGTGILETVVPGC(+57.02)PETFREQ(+.98)TR.H         | Y    | 31.85  | 3091.5647 | 27     | 3.3  | 1031.5322 | 3 | 43.45 | 36       | F36:2184 | OB5948 H3B Ro.raw | 0                   | 0        | 0                       | 88    | 114 | Carbamidomethylation; Deamidation (NQ) | C18:Carbamidomethylation:1000.00;Q25:Deamidation (NQ):42.82 | PEAKS DB  |
| R.LQYVLQGTGILETVVPGC(+57.02)PETFR(+14.02)EQTR.H       | Y    | 29.44  | 3104.5964 | 27     | 2.9  | 1035.8757 | 3 | 35.54 | 36       | F36:1791 | OB5948 H3B Ro.raw | 3.2709E5            | 1        | 1                       | 88    | 114 | Carbamidomethylation                   | C18:Carbamidomethylation:1000.00;R23:Methylation(KR):11.01  | PEAKS PTM |
| R.LQYVLQGTGILETVVPGCPETFRE(+57.02)QTR.H               | Y    | 28.85  | 3090.5808 | 27     | 6.1  | 1031.2098 | 3 | 48.29 | 30       | F30:2312 | OB5926 H3B Ro.raw | 0                   | 0        | 0                       | 88    | 114 |                                        | E24:Carbamidomethylation (DH KE, X@N-term):6.65             | PEAKS PTM |
| total 21 peptides                                     |      |        |           |        |      |           |   |       |          |          |                   |                     |          |                         |       |     |                                        |                                                             |           |

Q647H1|Q647H1\_ARAHY

back to list

| Protein Coverage | Supporting Peptides |

Protein Coverage:

1 MVIGPFRLSL CVCLVFLTSA CFGTRLEESF NECQLDRLNA LTPDNRIESQ GGITETWNSN HPELRCAGVT LLKRTIFPNG

81 FHLPSYANYP QLIFIAQGNG VFGVSLPGCP VTYYEAEQS REDRRQRIVI KRESEQEQQ QGDSHHKIYH FRQGHLLAIP

161 AGVPYWSFNY GNEPIVAITL LDTSNLDNQL DPSPRRFYLA GNPEEEHPET QQQQPQTRRR HGQHQQDEYG SQGEEEGNNV

241 LSGFSTQLLA HAFGVDEEIA RILQNPPEQT KDQIVRVEGG FRDVISPRWG EGKQYEDELE ERQRQPPRRD EQGKGYYDYDD

321 DRRPRHRQDP YREGDEDDRR PRGSRQGQGR GYDDDDRRPG QYEEGEEDDR RPRRSSRPKR QGRRHDDDDR RADEDDRRGY

401 DDERRPDED DRRGYDDDER RPDDDDRQGY DDDDRRPRWS SRPKGQGRNG VEETLCSPPTL VEDIARPSRA DFYNPAAGRI

481 SSANSITFPI LRWFQLSAEH VLLYRNGIYS PHWNNNANSI IYGLRGEGR I QVVNSQGNV FNGVLREGQI LLVPQNFVAVG

561 KQAGNEGFY VAFKTADRAS PATSSKCLGE SPLMFSSMLL AFEIIKSVLS NTMETRPLWS LLMIPSMGLN VVINLNHNNN

641 AQVDSKNNDG SRLWWPSSII IK

Carbamidomethylation (+57.02)

Deamidation (NQ) (+0.98)

Diethylation (+56.06)

Supporting Peptides:

| Peptide            | Uniq | -10lgP | Mass      | Length | ppm | m/z      | z | RT    | Fraction | Scan     | Source File      | Area Roasted in gel | #Feature | #Feature Roasted in gel | Start | End | PTM | AScore | Found By |
|--------------------|------|--------|-----------|--------|-----|----------|---|-------|----------|----------|------------------|---------------------|----------|-------------------------|-------|-----|-----|--------|----------|
| R.IQVNSQGNVFNGLR.E | Y    | 130.47 | 1813.9799 | 17     | 2.5 | 907.9995 | 2 | 33.04 | 29       | F29:1457 | OB5922 H2 Ro.raw | 4.3436E5            | 6        | 6                       | 530   | 546 |     |        | PEAKS DB |
| R.WFQLSAEHVLLYR.N  | Y    | 114.22 | 1660.8726 | 13     | 0.2 | 831.4437 | 2 | 34.54 | 34       | F34:1689 | OB5945 H2 Ro.raw | 5.8119E5            | 9        | 9                       | 493   | 505 |     |        | PEAKS DB |
| total 15 peptides  |      |        |           |        |     |          |   |       |          |          |                  |                     |          |                         |       |     |     |        |          |

| Peptide                               | Uniq | -10lgP | Mass      | Length | ppm  | m/z       | z | RT    | Fraction | Scan     | Source File      | Area Roasted in gel | #Feature | #Feature Roasted in gel | Start | End | PTM                  | AScore                                              | Found By  |
|---------------------------------------|------|--------|-----------|--------|------|-----------|---|-------|----------|----------|------------------|---------------------|----------|-------------------------|-------|-----|----------------------|-----------------------------------------------------|-----------|
| R.IQVVNSQGNVFN(+.98)GVLR.E            | Y    | 112.05 | 1814.9639 | 17     | 0.5  | 908.4896  | 2 | 32.42 | 33       | F33:1586 | OB5944 H6 Ro.raw | 0                   | 0        | 0                       | 530   | 546 | Deamidation (NQ)     | N13:Deamidation (NQ):77.51                          | PEAKS DB  |
| R.ISSANSLTFPILR.W                     | Y    | 100.20 | 1417.7928 | 13     | 0.5  | 709.9041  | 2 | 34.35 | 34       | F34:1668 | OB5945 H2 Ro.raw | 5.7598E5            | 6        | 6                       | 480   | 492 |                      |                                                     | PEAKS DB  |
| R.EGQILLVPQNFAVGK.Q                   | Y    | 83.62  | 1611.8984 | 15     | 1.4  | 806.9576  | 2 | 34.05 | 33       | F33:1681 | OB5944 H6 Ro.raw | 4.8642E5            | 6        | 6                       | 547   | 561 |                      |                                                     | PEAKS DB  |
| K.QAGNEGFYVAFK.T                      | Y    | 78.82  | 1458.6779 | 13     | 0.7  | 730.3467  | 2 | 32.31 | 29       | F29:1403 | OB5922 H2 Ro.raw | 2.1182E5            | 2        | 2                       | 562   | 574 |                      |                                                     | PEAKS DB  |
| R.IQ(+.98)VVNSQGNVFNFGVLR.E           | Y    | 73.16  | 1814.9639 | 17     | 2.4  | 908.4914  | 2 | 32.79 | 32       | F32:1603 | OB5943 H6 Ro.raw | 0                   | 0        | 0                       | 530   | 546 | Deamidation (NQ)     | Q2:Deamidation (NQ):37.78                           | PEAKS DB  |
| R.ADFYNPAAGR.I                        | Y    | 71.58  | 1080.4988 | 10     | -0.6 | 541.2563  | 2 | 28.20 | 34       | F34:1311 | OB5945 H2 Ro.raw | 3.6064E4            | 6        | 6                       | 470   | 479 |                      |                                                     | PEAKS DB  |
| R.IQVVNSQGNVFNFGVLRREGQILLVPQNFAVGK.Q | Y    | 55.28  | 3407.8677 | 32     | 5.1  | 1136.9690 | 3 | 38.18 | 35       | F35:1888 | OB5946 H2 Ro.raw | 3.4122E4            | 1        | 1                       | 530   | 561 |                      |                                                     | PEAKS DB  |
| R.IQVVN(+.98)SQGNVFNFGVLR.E           | Y    | 45.93  | 1814.9639 | 17     | 1.6  | 908.4907  | 2 | 33.23 | 33       | F33:1633 | OB5944 H6 Ro.raw | 0                   | 0        | 0                       | 530   | 546 |                      | N5:Deamidation (NQ):0.00                            | PEAKS DB  |
| N.GVEETLC(+57.02)SPTLVEDIARPSR.A      | Y    | 41.24  | 2228.1106 | 20     | 2.1  | 743.7124  | 3 | 32.69 | 35       | F35:1580 | OB5946 H2 Ro.raw | 1.5861E5            | 2        | 2                       | 450   | 469 | Carbamidomethylation | C7:Carbamidomethylation:1000.00                     | PEAKS DB  |
| R.N(+.98)GIYSPHWNNNANSIYGLR.G         | Y    | 39.54  | 2303.1084 | 20     | 4.1  | 768.7132  | 3 | 34.70 | 33       | F33:1718 | OB5944 H6 Ro.raw | 0                   | 0        | 0                       | 506   | 525 | Deamidation (NQ)     | N1:Deamidation (NQ):32.94                           | PEAKS DB  |
| R.EGQILLVPQNFAVGK(+56.06).Q           | Y    | 36.77  | 1667.9609 | 15     | 0.8  | 834.9884  | 2 | 34.91 | 29       | F29:1568 | OB5922 H2 Ro.raw | 4.0125E5            | 1        | 1                       | 547   | 561 | Diethylation         | K15:Diethylation:121.40                             | PEAKS PTM |
| R.N(+.98)GIYSPHWNNNAN(+.98)SIYGLR.G   | Y    | 29.76  | 2304.0923 | 20     | 8.5  | 769.0446  | 3 | 34.92 | 32       | F32:1731 | OB5943 H6 Ro.raw | 3.732E3             | 1        | 1                       | 506   | 525 |                      | N1:Deamidation (NQ):17.32;N13:Deamidation (NQ):6.63 | PEAKS DB  |
| R.N(+.98)GIYSPHWNNNANSIYGLRGEGR.I     | Y    | 28.99  | 2702.2949 | 24     | 1.9  | 901.7739  | 3 | 33.89 | 29       | F29:1505 | OB5922 H2 Ro.raw | 0                   | 0        | 0                       | 506   | 529 | Deamidation (NQ)     | N1:Deamidation (NQ):47.84                           | PEAKS DB  |
| total 15 peptides                     |      |        |           |        |      |           |   |       |          |          |                  |                     |          |                         |       |     |                      |                                                     |           |

A5Z1R0|A5Z1R0\_ARAHY

[back to list](#)

| [Protein Coverage](#) | [Supporting Peptides](#) |

Protein Coverage:

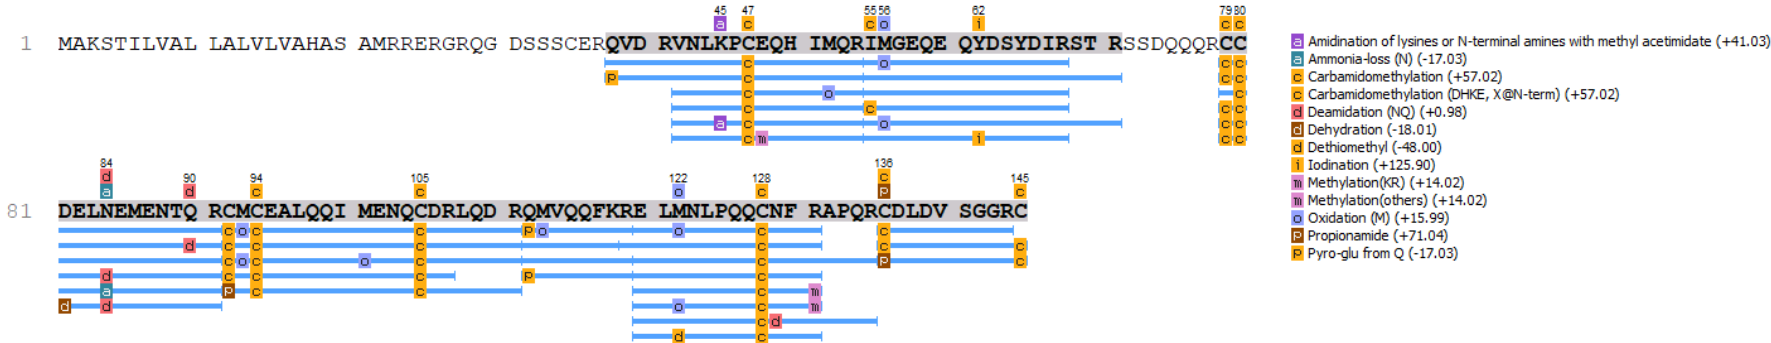

Supporting Peptides:

| Peptide                    | Uniq | -10lgP | Mass      | Length | ppm | m/z      | z | RT    | Fraction | Scan     | Source File      | Area Roasted in gel | #Feature | #Feature Roasted in gel | Start | End | PTM           | AScore                  | Found By |
|----------------------------|------|--------|-----------|--------|-----|----------|---|-------|----------|----------|------------------|---------------------|----------|-------------------------|-------|-----|---------------|-------------------------|----------|
| R.IMGEQEYQDSYDIR.S         | Y    | 107.91 | 1745.7566 | 14     | 3.7 | 873.8888 | 2 | 30.09 | 33       | F33:1427 | OB5944 H6 Ro.raw | 1.44E7              | 14       | 14                      | 55    | 68  |               |                         | PEAKS DB |
| R.IM(+15.99)GEQEYQDSYDIR.S | Y    | 105.99 | 1761.7516 | 14     | 1.3 | 881.8842 | 2 | 28.67 | 33       | F33:1354 | OB5944 H6 Ro.raw | 2.9749E6            | 8        | 8                       | 55    | 68  | Oxidation (M) | M2:Oxidation (M):100.00 | PEAKS DB |
| total 46 peptides          |      |        |           |        |     |          |   |       |          |          |                  |                     |          |                         |       |     |               |                         |          |

| Peptide                                          | Uniq | -10lgP | Mass      | Length | ppm  | m/z       | z | RT    | Fraction | Scan     | Source File      | Area Roasted in gel | #Feature | #Feature Roasted in gel | Start | End | PTM                                    | AScore                                                                                                   | Found By  |
|--------------------------------------------------|------|--------|-----------|--------|------|-----------|---|-------|----------|----------|------------------|---------------------|----------|-------------------------|-------|-----|----------------------------------------|----------------------------------------------------------------------------------------------------------|-----------|
| R.ELMNLPQQC(+57.02)NFR.A                         | Y    | 100.23 | 1548.7177 | 12     | 1.9  | 775.3676  | 2 | 31.56 | 29       | F29:1364 | OB5922 H2 Ro.raw | 8.4271E6            | 16       | 16                      | 120   | 131 | Carbamidomethylation                   | C9:Carb amidome thylatio n:1000.00                                                                       | PEAKS DB  |
| R.I(+57.02)MGEQEQYDSYDIR.S                       | Y    | 99.36  | 1802.7781 | 14     | 1.9  | 902.3981  | 2 | 30.45 | 32       | F32:1466 | OB5943 H6 Ro.raw | 1.078E5             | 3        | 3                       | 55    | 68  | Carbamidomethylation (DHKE, X@N-term)  | I1:Carba midomet hylation (DHKE, X@N-term):49.43                                                         | PEAKS PTM |
| R.C(+57.02)MC(+57.02)EALQQIMENQC(+57.02)DR.L     | Y    | 96.38  | 2084.8206 | 16     | 2.3  | 1043.4199 | 2 | 33.49 | 31       | F31:1648 | OB5942 H6 Ro.raw | 3.1431E4            | 2        | 2                       | 92    | 107 | Carbamidomethylation                   | C1:Carb amidome thylatio n:1000.00;C3:Car bamidom ethylation:1000.00;C14:C arbamid omethyla tion:1000.00 | PEAKS DB  |
| R.ELM(+15.99)NLPQQC(+57.02)NFR.A                 | Y    | 91.99  | 1564.7126 | 12     | -0.6 | 783.3632  | 2 | 28.85 | 33       | F33:1365 | OB5944 H6 Ro.raw | 9.5551E5            | 5        | 5                       | 120   | 131 | Oxidation (M); Carbamidomethylation    | M3:Oxid ation (M):100 0.00;C9: Carbami domethyl ation:1000.00                                            | PEAKS DB  |
| R.C(+57.02)C(+57.02)DELNEMENTQR.C                | Y    | 90.44  | 1697.6444 | 13     | 0.6  | 849.8300  | 2 | 27.44 | 31       | F31:1278 | OB5942 H6 Ro.raw | 3.0478E5            | 3        | 3                       | 79    | 91  | Carbamidomethylation                   | C1:Carb amidome thylatio n:1000.00;C2:Car bamidom ethylation:1000.00                                     | PEAKS DB  |
| R.C(+57.02)C(+57.02)DELNEMENTQ(+.98)R.C          | Y    | 85.19  | 1698.6284 | 13     | 0.2  | 850.3217  | 2 | 28.19 | 31       | F31:1324 | OB5942 H6 Ro.raw | 3.601E5             | 3        | 3                       | 79    | 91  | Carbamidomethylation; Deamidation (NQ) | C1:Carb amidome thylatio n:1000.00;C2:Car bamidom ethylation:1000.00;Q12:De amidati on (NQ): 60.92       | PEAKS DB  |
| R.VNLKPC(+57.02)EQHIMQR.I                        | Y    | 77.65  | 1651.8286 | 13     | 0.5  | 551.6171  | 3 | 28.40 | 32       | F32:1356 | OB5943 H6 Ro.raw | 1.0332E6            | 5        | 5                       | 42    | 54  | Carbamidomethylation                   | C6:Carb amidome thylatio n:1000.00                                                                       | PEAKS DB  |
| R.C(+57.02)MC(+57.02)EALQQIMENQC(+57.02)DRLQDR.Q | Y    | 76.01  | 2597.0913 | 20     | 3.1  | 866.7070  | 3 | 33.49 | 31       | F31:1646 | OB5942 H6 Ro.raw | 3.1154E6            | 12       | 12                      | 92    | 111 | Carbamidomethylation                   | C1:Carb amidome thylatio n:1000.00;C3:Car bamidom ethylation:1000.00;C14:C arbamid omethyla tion:1000.00 | PEAKS DB  |
| R.Q(-17.03)VDRVNLKPC(+57.02)EQHIMQR.I            | Y    | 74.55  | 2133.0571 | 17     | 1.2  | 534.2722  | 4 | 30.44 | 32       | F32:1454 | OB5943 H6 Ro.raw | 8.5431E5            | 5        | 5                       | 38    | 54  | Pyro-glu from Q; Carbamidomethylation  | Q1:Pyro-glu from Q:1000.00;C10:                                                                          | PEAKS PTM |
| total 46 peptides                                |      |        |           |        |      |           |   |       |          |          |                  |                     |          |                         |       |     |                                        |                                                                                                          |           |

| Peptide                                                  | Uniq | -10lgP | Mass      | Length | ppm  | m/z      | z | RT    | Fraction | Scan     | Source File      | Area Roasted in gel | #Feature | #Feature Roasted in gel | Start | End | PTM                                 | AScore                                                                                                                  | Found By  |
|----------------------------------------------------------|------|--------|-----------|--------|------|----------|---|-------|----------|----------|------------------|---------------------|----------|-------------------------|-------|-----|-------------------------------------|-------------------------------------------------------------------------------------------------------------------------|-----------|
|                                                          |      |        |           |        |      |          |   |       |          |          |                  |                     |          |                         |       |     |                                     | Carbamidomethylation:1000.00                                                                                            |           |
| R.QVDRVNLKPC(+57.02)EQHIMQR.I                            | Y    | 71.69  | 2150.0837 | 17     | 0.0  | 538.5282 | 4 | 29.70 | 32       | F32:1432 | OB5943 H6 Ro.raw | 4.1805E5            | 4        | 4                       | 38    | 54  | Carbamidomethylation                | C10:Carbamidomethylation:1000.00                                                                                        | PEAKS DB  |
| R.C(+57.02)DLDVSGGRC(+57.02)                             | Y    | 70.42  | 1137.4543 | 10     | -0.5 | 569.7342 | 2 | 25.28 | 32       | F32:1158 | OB5943 H6 Ro.raw | 4.867E4             | 3        | 3                       | 136   | 145 | Carbamidomethylation                | C1:Carbamidomethylation:1000.00;C10:Carbamidomethylation:1000.00                                                        | PEAKS DB  |
| R.C(+71.04)DLDVSGGRC(+57.02)                             | Y    | 64.73  | 1151.4700 | 10     | 0.9  | 576.7428 | 2 | 25.64 | 32       | F32:1183 | OB5943 H6 Ro.raw | 1.3899E4            | 3        | 3                       | 136   | 145 | Propionamide; Carbamidomethylation  | C1:Propionamide:156.52;C10:Carbamidomethylation:1000.00                                                                 | PEAKS PTM |
| R.C(+71.04)C(+57.02)DELNEMENTQR.C                        | Y    | 63.47  | 1711.6600 | 13     | 1.0  | 856.8381 | 2 | 27.64 | 31       | F31:1283 | OB5942 H6 Ro.raw | 2.8007E5            | 3        | 3                       | 79    | 91  | Carbamidomethylation                | C1:Propionamide:10.11;C2:Carbamidomethylation:1000.00                                                                   | PEAKS PTM |
| R.C(+57.02)DLDVSGGR.C                                    | Y    | 63.35  | 977.4236  | 9      | -0.5 | 489.7189 | 2 | 24.23 | 33       | F33:1121 | OB5944 H6 Ro.raw | 8.8623E2            | 1        | 1                       | 136   | 144 | Carbamidomethylation                | C1:Carbamidomethylation:1000.00                                                                                         | PEAKS DB  |
| R.C(+57.02)M(+15.99)C(+57.02)EALQQIMENQC(+57.02)DRLQDR.Q | Y    | 60.71  | 2613.0862 | 20     | 1.4  | 872.0372 | 3 | 31.19 | 32       | F32:1576 | OB5943 H6 Ro.raw | 5.7636E5            | 5        | 5                       | 92    | 111 | Carbamidomethylation; Oxidation (M) | C1:Carbamidomethylation:1000.00;M2:Oxidation (M):89.48;C3:Carbamidomethylation:1000.00;C14:Carbamidomethylation:1000.00 | PEAKS DB  |
| R.Q(-17.03)MVQQFKR.E                                     | Y    | 60.42  | 1046.5331 | 8      | 0.0  | 524.2738 | 2 | 27.84 | 32       | F32:1322 | OB5943 H6 Ro.raw | 3.5192E5            | 3        | 3                       | 112   | 119 | Pyro-glu from Q                     | Q1:Pyro-glu from Q:1000.00                                                                                              | PEAKS PTM |
| R.C(+71.04)MC(+57.02)EALQQIMENQC(+57.02)DRLQDR.Q         | Y    | 60.30  | 2611.1069 | 20     | 1.1  | 871.3772 | 3 | 33.49 | 31       | F31:1647 | OB5942 H6 Ro.raw | 6.2487E5            | 2        | 2                       | 92    | 111 | Propionamide; Carbamidomethylation  | C1:Propionamide:20.41;C3:Carbamidomethylation:1000.00;C14:Carbamidomethylation:1000.00                                  | PEAKS PTM |
| R.C(+57.02)(+28.03)C(+57.02)DELNEMENTQR.C                | Y    | 57.63  | 1725.6757 | 13     | 1.0  | 863.8460 | 2 | 28.03 | 32       | F32:1316 | OB5943 H6 Ro.raw | 1.6949E4            | 1        | 1                       | 79    | 91  | Carbamidomethylation                | C1:Carbamidomethylation:1000.00;C1:Eth                                                                                  | PEAKS PTM |
| total 46 peptides                                        |      |        |           |        |      |          |   |       |          |          |                  |                     |          |                         |       |     |                                     |                                                                                                                         |           |



| Peptide                                   | Uniq | -10lgP | Mass      | Length | ppm  | m/z      | z | RT    | Fraction | Scan     | Source File      | Area Roasted in gel | #Feature | #Feature Roasted in gel | Start | End | PTM                                    | AScore                                                                                    | Found By  |
|-------------------------------------------|------|--------|-----------|--------|------|----------|---|-------|----------|----------|------------------|---------------------|----------|-------------------------|-------|-----|----------------------------------------|-------------------------------------------------------------------------------------------|-----------|
|                                           |      |        |           |        |      |          |   |       |          |          |                  |                     |          |                         |       |     |                                        | ylation:18.53;C2:Carbamidomethylation:1000.00                                             |           |
| R.ELMNLPQQC(+57.02)NFRAPQR.C              | Y    | 56.72  | 2000.9673 | 16     | 0.5  | 667.9967 | 3 | 30.28 | 35       | F35:1430 | OB5946 H2 Ro.raw | 1.0432E5            | 5        | 5                       | 120   | 135 | Carbamidomethylation                   | C9:Carbamidomethylation:1000.00                                                           | PEAKS DB  |
| R.ELMNLPQQC(+57.02)NF(+31.99)R.A          | Y    | 49.69  | 1580.7075 | 12     | -9.5 | 791.3535 | 2 | 31.67 | 31       | F31:1538 | OB5942 H6 Ro.raw | 0                   | 0        | 0                       | 120   | 131 | Carbamidomethylation                   | C9:Carbamidomethylation:1000.00;F11:Di-hydroxy:0.00                                       | PEAKS PTM |
| R.ELMNLPQQC(+57.02)NFR(+14.02).A          | Y    | 49.60  | 1562.7334 | 12     | 0.3  | 782.3742 | 2 | 31.27 | 33       | F33:1519 | OB5944 H6 Ro.raw | 2.0625E5            | 3        | 3                       | 120   | 131 | Carbamidomethylation; Methylation(KR)  | C9:Carbamidomethylation:1000.00;R12:Methylation(KR):1000.00                               | PEAKS PTM |
| R.C(+57.02)C(+57.02)DELN(+.98)EMENTQR.C   | Y    | 49.50  | 1698.6284 | 13     | -1.6 | 850.3201 | 2 | 29.09 | 31       | F31:1387 | OB5942 H6 Ro.raw | 0                   | 0        | 0                       | 79    | 91  | Carbamidomethylation; Deamidation (NQ) | C1:Carbamidomethylation:1000.00;C2:Carbamidomethylation:1000.00;N6:Deamidation (NQ):31.56 | PEAKS DB  |
| R.IM(+15.99)GE(+57.02)QEYDSYDIR.S         | Y    | 48.79  | 1818.7729 | 14     | 0.3  | 910.3940 | 2 | 29.25 | 32       | F32:1394 | OB5943 H6 Ro.raw | 2.5217E3            | 1        | 1                       | 55    | 68  | Oxidation (M)                          | M2:Oxidation (M):1000.00;E4:Carbamidomethylation (D HKE, X@N-term):0.00                   | PEAKS PTM |
| R.ELM(-48.00)NLPQQC(+57.02)NFR.A          | Y    | 48.30  | 1500.7144 | 12     | -0.1 | 501.2454 | 3 | 27.84 | 32       | F32:1311 | OB5943 H6 Ro.raw | 2.9967E5            | 2        | 2                       | 120   | 131 | Dethiomethyl; Carbamidomethylation     | M3:Dethiomethyl:1000.00;C9:Carbamidomethylation:1000.00                                   | PEAKS PTM |
| R.QMVQQFK.R                               | Y    | 48.24  | 907.4586  | 7      | -0.6 | 454.7363 | 2 | 25.61 | 33       | F33:1183 | OB5944 H6 Ro.raw | 8.0264E3            | 2        | 2                       | 112   | 118 |                                        |                                                                                           | PEAKS DB  |
| R.ELMNLPQQC(+57.02)N(+.98)FRAPQR.C        | Y    | 47.04  | 2001.9513 | 16     | 1.0  | 668.3250 | 3 | 30.88 | 32       | F32:1490 | OB5943 H6 Ro.raw | 0                   | 0        | 0                       | 120   | 135 | Carbamidomethylation; Deamidation (NQ) | C9:Carbamidomethylation:1000.00;N10:Deamidation (NQ):24.24                                | PEAKS DB  |
| R.C(+57.02)C(+57.02)DELN(-17.03)EMENTQR.C | Y    | 44.87  | 1680.6178 | 13     | 1.0  | 841.3170 | 2 | 32.29 | 32       | F32:1575 | OB5943 H6 Ro.raw | 3.9042E4            | 2        | 2                       | 79    | 91  | Carbamidomethylation; Ammonia-loss (N) | C1:Carbamidomethylation:1000.00;C2:Carbamidomethylation:1000.00;N6:Am                     | PEAKS PTM |
| total 46 peptides                         |      |        |           |        |      |          |   |       |          |          |                  |                     |          |                         |       |     |                                        |                                                                                           |           |

| Peptide                                                          | Uniq | -10lgP | Mass      | Length | ppm  | m/z      | z | RT    | Fraction | Scan     | Source File      | Area Roasted in gel | #Feature | #Feature Roasted in gel | Start | End | PTM                                                                                       | AScore                                                                                                                                              | Found By  |
|------------------------------------------------------------------|------|--------|-----------|--------|------|----------|---|-------|----------|----------|------------------|---------------------|----------|-------------------------|-------|-----|-------------------------------------------------------------------------------------------|-----------------------------------------------------------------------------------------------------------------------------------------------------|-----------|
|                                                                  |      |        |           |        |      |          |   |       |          |          |                  |                     |          |                         |       |     |                                                                                           | monia-loss (N):15.18                                                                                                                                |           |
| R.IMGEQEYDSYDIRSTR.S                                             | Y    | 44.57  | 2089.9375 | 17     | 2.0  | 697.6545 | 3 | 28.94 | 31       | F31:1381 | OB5942 H6 Ro.raw | 4.9618E4            | 2        | 2                       | 55    | 71  |                                                                                           |                                                                                                                                                     | PEAKS DB  |
| R.C(+57.02)M(+15.99)C(+57.02)EALQQIM(+15.99)ENQC(+57.02)DRLQDR.Q | Y    | 43.42  | 2629.0811 | 20     | 2.0  | 877.3694 | 3 | 29.88 | 32       | F32:1425 | OB5943 H6 Ro.raw | 7.9642E3            | 1        | 1                       | 92    | 111 | Carbamidomethylation; Oxidation (M)                                                       | C1:Carbamidomethylation:1000.00;M2:Oxidation (M):1000.00;C3:Carbamidomethylation:1000.00;M10:Oxidation (M):1000.00;C14:Carbamidomethylation:1000.00 | PEAKS DB  |
| R.VNLKPC(+57.02)EQHIM(+15.99)QR.I                                | Y    | 43.11  | 1667.8236 | 13     | 0.6  | 556.9488 | 3 | 26.91 | 31       | F31:1258 | OB5942 H6 Ro.raw | 2.1143E4            | 1        | 1                       | 42    | 54  | Carbamidomethylation; Oxidation (M)                                                       | C6:Carbamidomethylation:1000.00;M11:Oxidation (M):1000.00                                                                                           | PEAKS DB  |
| K.RELMNLPQQC(+57.02)NFR.A                                        | Y    | 42.73  | 1704.8188 | 13     | 0.8  | 569.2807 | 3 | 29.89 | 31       | F31:1434 | OB5942 H6 Ro.raw | 0                   | 0        | 0                       | 119   | 131 | Carbamidomethylation                                                                      | C10:Carbamidomethylation:1000.00                                                                                                                    | PEAKS DB  |
| R.VNLK(+41.03)PC(+57.02)EQHIMQR.I                                | Y    | 39.06  | 1692.8552 | 13     | 3.3  | 565.2942 | 3 | 29.51 | 32       | F32:1408 | OB5943 H6 Ro.raw | 4.1722E3            | 1        | 1                       | 42    | 54  | Amidination of lysines or N-terminal amines with methyl acetimidate; Carbamidomethylation | K4:Amidination of lysines or N-terminal amines with methyl acetimidate:38.16; C6:Carbamidomethylation:1000.00                                       | PEAKS PTM |
| R.IMGE(+17.03)QEYDSYDIR.S                                        | Y    | 37.70  | 1762.7832 | 14     | -4.0 | 882.3953 | 2 | 30.83 | 31       | F31:1488 | OB5942 H6 Ro.raw | 0                   | 0        | 0                       | 55    | 68  |                                                                                           | E4:Replacement of proton with ammonium ion:18.53                                                                                                    | PEAKS PTM |
| R.IMGEQEY(-18.01)DSYDIR.S                                        | Y    | 36.74  | 1727.7461 | 14     | 3.4  | 864.8833 | 2 | 30.78 | 32       | F32:1484 | OB5943 H6 Ro.raw | 0                   | 0        | 0                       | 55    | 68  |                                                                                           | Y8:Dehydration:0.00                                                                                                                                 | PEAKS PTM |
| R.IM(+15.99)GEQEYDSYDIRSTR.S                                     | Y    | 35.70  | 2105.9324 | 17     | -1.9 | 702.9834 | 3 | 27.45 | 31       | F31:1288 | OB5942 H6 Ro.raw | 2.3858E3            | 1        | 1                       | 55    | 71  | Oxidation (M)                                                                             | M2:Oxidation (M):1000.00                                                                                                                            | PEAKS DB  |
| R.ELM(+15.99)NLPQQC(+57.02)NFR(+14.02).A                         | Y    | 35.08  | 1578.7283 | 12     | 1.8  | 790.3729 | 2 | 29.10 | 33       | F33:1390 | OB5944 H6 Ro.raw | 0                   | 0        | 0                       | 120   | 131 | Oxidation (M); Carbamidomethylation; Methylation(KR)                                      | M3:Oxidation (M):1000.00;C9:Carbamidomethylation:1000.00;R12:Methyl                                                                                 | PEAKS PTM |
| total 46 peptides                                                |      |        |           |        |      |          |   |       |          |          |                  |                     |          |                         |       |     |                                                                                           |                                                                                                                                                     |           |

| Peptide                                                | Uniq | -10lgP | Mass      | Length | ppm  | m/z      | z | RT    | Fraction | Scan     | Source File       | Area Roasted in gel | #Feature | #Feature Roasted in gel | Start | End | PTM                                                 | AScore                                                                                                                                   | Found By  |
|--------------------------------------------------------|------|--------|-----------|--------|------|----------|---|-------|----------|----------|-------------------|---------------------|----------|-------------------------|-------|-----|-----------------------------------------------------|------------------------------------------------------------------------------------------------------------------------------------------|-----------|
|                                                        |      |        |           |        |      |          |   |       |          |          |                   |                     |          |                         |       |     |                                                     | ation(K R):1000.00                                                                                                                       |           |
| R.QMVQQFKR.E                                           | Y    | 34.38  | 1063.5597 | 8      | 0.9  | 532.7876 | 2 | 26.84 | 32       | F32:1239 | OB5943 H6 Ro.raw  | 1.9987E4            | 2        | 2                       | 112   | 119 |                                                     |                                                                                                                                          | PEAKS DB  |
| R.C(+57.02)C(+57.02)D(-18.01)ELN(+.98)EMENTQR.C        | Y    | 33.99  | 1680.6178 | 13     | 1.7  | 841.3176 | 2 | 31.98 | 31       | F31:1599 | OB5942 H6 Ro.raw  | 2.4089E4            | 1        | 1                       | 79    | 91  | Carbamidomethylation; Dehydration; Deamidation (NQ) | C1:Carb amidome thylatio n:1000.0 0;C2:Car bamidom ethylatio n:1000.0 0;D3:De hydratio n:62.90; N6:Dea midation (NQ):83.17               | PEAKS PTM |
| R.I(+57.02)M(+15.99)GEQEYDSYDIR.S                      | Y    | 33.09  | 1818.7729 | 14     | 0.8  | 910.3945 | 2 | 28.84 | 31       | F31:1372 | OB5942 H6 Ro.raw  | 0                   | 0        | 0                       | 55    | 68  | Oxidation (M)                                       | I1:Carba midomet hylation (DHKE, X@N-ter m):17.3 2;M2:Oxi dation (M):100 0.00                                                            | PEAKS PTM |
| R.IMGEQE(+53.92)QYDSYDIR.S                             | Y    | 32.96  | 1799.6759 | 14     | -2.3 | 600.8979 | 3 | 30.20 | 32       | F32:1450 | OB5943 H6 Ro.raw  | 0                   | 0        | 0                       | 55    | 68  |                                                     | E6:Repla cement o f 2 proto ns by iro n:14.63                                                                                            | PEAKS PTM |
| R.C(+57.02)MC(+57.02)EALQQ(+.98)IMENQC(+57.02)DRLQDR.Q | Y    | 32.01  | 2598.0754 | 20     | -6.2 | 867.0270 | 3 | 33.99 | 36       | F36:1638 | OB5948 H3B Ro.raw | 0                   | 0        | 0                       | 92    | 111 | Carbamidomethylation                                | C1:Carb amidome thylatio n:1000.0 0;C3:Car bamidom ethylatio n:1000.0 0;Q8:De amidatio n (NQ): 0.00;C1 4:Carba midomet hylation: 1000.00 | PEAKS DB  |
| R.VNLKPC(+57.02)E(+14.02)QHIMQR.I                      | Y    | 31.29  | 1665.8444 | 13     | -0.4 | 556.2885 | 3 | 28.77 | 32       | F32:1372 | OB5943 H6 Ro.raw  | 2.0373E4            | 1        | 1                       | 42    | 54  | Carbamidomethylation; Methylation(others)           | C6:Carb amidome thylatio n:1000.0 0;E7:Met hylation (others): 55.92                                                                      | PEAKS PTM |
| R.Q(-17.03)M(+15.99)VQQFKR.E                           | Y    | 31.12  | 1062.5281 | 8      | 3.0  | 532.2729 | 2 | 25.67 | 32       | F32:1189 | OB5943 H6 Ro.raw  | 0                   | 0        | 0                       | 112   | 119 | Pyro-glu from Q; Oxidation (M)                      | Q1:Pyro- glu from Q:1000. 00;M2:O xidation (M):100 0.00                                                                                  | PEAKS PTM |
| R.IMGEQEY(+125.90)DSYDIR.S                             | Y    | 29.13  | 1871.6533 | 14     | 2.0  | 936.8358 | 2 | 32.29 | 32       | F32:1560 | OB5943 H6 Ro.raw  | 6.88E3              | 1        | 1                       | 55    | 68  | Iodination                                          | Y8:Iodin ation:41. 59                                                                                                                    | PEAKS PTM |
| total 46 peptides                                      |      |        |           |        |      |          |   |       |          |          |                   |                     |          |                         |       |     |                                                     |                                                                                                                                          |           |

Protein Coverage:

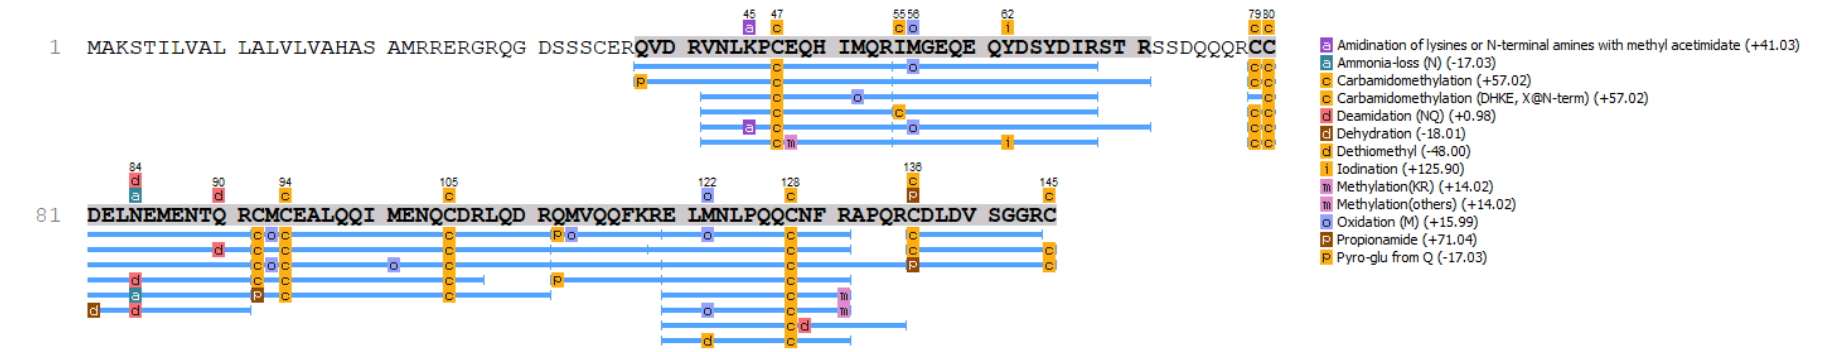

Supporting Peptides:

| Peptide                                      | Uniq | -10lgP | Mass      | Length | ppm  | m/z       | z | RT    | Fraction | Scan     | Source File      | Area Roasted in gel | #Feature | #Feature Roasted in gel | Start | End | PTM                                   | AScore                                                                                             | Found By  |
|----------------------------------------------|------|--------|-----------|--------|------|-----------|---|-------|----------|----------|------------------|---------------------|----------|-------------------------|-------|-----|---------------------------------------|----------------------------------------------------------------------------------------------------|-----------|
| R.IMGEQEYDSYDIR.S                            | Y    | 107.91 | 1745.7566 | 14     | 3.7  | 873.8888  | 2 | 30.09 | 33       | F33:1427 | OB5944 H6 Ro.raw | 1.44E7              | 14       | 14                      | 55    | 68  |                                       |                                                                                                    | PEAKS DB  |
| R.IM(+15.99)GEQEYDSYDIR.S                    | Y    | 105.99 | 1761.7516 | 14     | 1.3  | 881.8842  | 2 | 28.67 | 33       | F33:1354 | OB5944 H6 Ro.raw | 2.9749E6            | 8        | 8                       | 55    | 68  | Oxidation (M)                         | M2:Oxidation (M):10 00.00                                                                          | PEAKS DB  |
| R.ELMNLPQQC(+57.02)NFR.A                     | Y    | 100.23 | 1548.7177 | 12     | 1.9  | 775.3676  | 2 | 31.56 | 29       | F29:1364 | OB5922 H2 Ro.raw | 8.4271E6            | 16       | 16                      | 120   | 131 | Carbamidomethylation                  | C9:Carbamidomethylation:1 000.00                                                                   | PEAKS DB  |
| R.I(+57.02)MGEQEYDSYDIR.S                    | Y    | 99.36  | 1802.7781 | 14     | 1.9  | 902.3981  | 2 | 30.45 | 32       | F32:1466 | OB5943 H6 Ro.raw | 1.078E5             | 3        | 3                       | 55    | 68  | Carbamidomethylation (DHKE, X@N-term) | I1:Carbamidomethylation (DHKE, X@N-term):4 9.43                                                    | PEAKS PTM |
| R.C(+57.02)MC(+57.02)EALQQIMENQC(+57.02)DR.L | Y    | 96.38  | 2084.8206 | 16     | 2.3  | 1043.4199 | 2 | 33.49 | 31       | F31:1648 | OB5942 H6 Ro.raw | 3.1431E4            | 2        | 2                       | 92    | 107 | Carbamidomethylation                  | C1:Carbamidomethylation:1 000.00;C3:Carbamidomethylation:1000.00;C14:Carbamidomethylation:100 0.00 | PEAKS DB  |
| R.ELM(+15.99)NLPQQC(+57.02)NFR.A             | Y    | 91.99  | 1564.7126 | 12     | -0.6 | 783.3632  | 2 | 28.85 | 33       | F33:1365 | OB5944 H6 Ro.raw | 9.5551E5            | 5        | 5                       | 120   | 131 | Oxidation (M); Carbamidomethylation   | M3:Oxidation (M):10 00.00;C9:Carbamidomethylation:1 000.00                                         | PEAKS DB  |
| R.C(+57.02)C(+57.02)DELNEMENTQR.C            | Y    | 90.44  | 1697.6444 | 13     | 0.6  | 849.8300  | 2 | 27.44 | 31       | F31:1278 | OB5942 H6 Ro.raw | 3.0478E5            | 3        | 3                       | 79    | 91  | Carbamidomethylation                  | C1:Carbamidomethylation:1 000.00;C2:C                                                              | PEAKS DB  |
| total 46 peptides                            |      |        |           |        |      |           |   |       |          |          |                  |                     |          |                         |       |     |                                       |                                                                                                    |           |

| Peptide                                          | Uniq | -10lgP | Mass      | Length | ppm  | m/z      | z | RT    | Fraction | Scan     | Source File      | Area Roasted in gel | #Feature | #Feature Roasted in gel | Start | End | PTM                                    | AScore                                                                                           | Found By  |
|--------------------------------------------------|------|--------|-----------|--------|------|----------|---|-------|----------|----------|------------------|---------------------|----------|-------------------------|-------|-----|----------------------------------------|--------------------------------------------------------------------------------------------------|-----------|
|                                                  |      |        |           |        |      |          |   |       |          |          |                  |                     |          |                         |       |     |                                        | arbamidomethylation:1000.00                                                                      |           |
| R.C(+57.02)C(+57.02)DELNEMENTQ(+.98)R.C          | Y    | 85.19  | 1698.6284 | 13     | 0.2  | 850.3217 | 2 | 28.19 | 31       | F31:1324 | OB5942 H6 Ro.raw | 3.601E5             | 3        | 3                       | 79    | 91  | Carbamidomethylation; Deamidation (NQ) | C1:Carbamidomethylation:1000.00;C2:Carbamidomethylation:1000.00;Q12:Deamidation (NQ):60.92       | PEAKS DB  |
| R.VNLKPC(+57.02)EQHIMQR.I                        | Y    | 77.65  | 1651.8286 | 13     | 0.5  | 551.6171 | 3 | 28.40 | 32       | F32:1356 | OB5943 H6 Ro.raw | 1.0332E6            | 5        | 5                       | 42    | 54  | Carbamidomethylation                   | C6:Carbamidomethylation:1000.00                                                                  | PEAKS DB  |
| R.C(+57.02)MC(+57.02)EALQQIMENQC(+57.02)DRLQDR.Q | Y    | 76.01  | 2597.0913 | 20     | 3.1  | 866.7070 | 3 | 33.49 | 31       | F31:1646 | OB5942 H6 Ro.raw | 3.1154E6            | 12       | 12                      | 92    | 111 | Carbamidomethylation                   | C1:Carbamidomethylation:1000.00;C3:Carbamidomethylation:1000.00;C14:Carbamidomethylation:1000.00 | PEAKS DB  |
| R.Q(-17.03)VDRVNLKPC(+57.02)EQHIMQR.I            | Y    | 74.55  | 2133.0571 | 17     | 1.2  | 534.2722 | 4 | 30.44 | 32       | F32:1454 | OB5943 H6 Ro.raw | 8.5431E5            | 5        | 5                       | 38    | 54  | Pyro-glu from Q; Carbamidomethylation  | Q1:Pyro-glu from Q:1000.00;C10:Carbamidomethylation:1000.00                                      | PEAKS PTM |
| R.QVDRVNLKPC(+57.02)EQHIMQR.I                    | Y    | 71.69  | 2150.0837 | 17     | 0.0  | 538.5282 | 4 | 29.70 | 32       | F32:1432 | OB5943 H6 Ro.raw | 4.1805E5            | 4        | 4                       | 38    | 54  | Carbamidomethylation                   | C10:Carbamidomethylation:1000.00                                                                 | PEAKS DB  |
| R.C(+57.02)DLDVSGGRC(+57.02)                     | Y    | 70.42  | 1137.4543 | 10     | -0.5 | 569.7342 | 2 | 25.28 | 32       | F32:1158 | OB5943 H6 Ro.raw | 4.867E4             | 3        | 3                       | 136   | 145 | Carbamidomethylation                   | C1:Carbamidomethylation:1000.00;C10:Carbamidomethylation:1000.00                                 | PEAKS DB  |
| R.C(+71.04)DLDVSGGRC(+57.02)                     | Y    | 64.73  | 1151.4700 | 10     | 0.9  | 576.7428 | 2 | 25.64 | 32       | F32:1183 | OB5943 H6 Ro.raw | 1.3899E4            | 3        | 3                       | 136   | 145 | Propionamide; Carbamidomethylation     | C1:Propionamide:156.52;C10:Carbamidomethylation:1000.00                                          | PEAKS PTM |
| total 46 peptides                                |      |        |           |        |      |          |   |       |          |          |                  |                     |          |                         |       |     |                                        |                                                                                                  |           |

| Peptide                                                  | Uniq | -10lgP | Mass      | Length | ppm  | m/z      | z | RT    | Fraction | Scan     | Source File      | Area Roasted in gel | #Feature | #Feature Roasted in gel | Start | End | PTM                                 | AScore                                                                                                                  | Found By  |
|----------------------------------------------------------|------|--------|-----------|--------|------|----------|---|-------|----------|----------|------------------|---------------------|----------|-------------------------|-------|-----|-------------------------------------|-------------------------------------------------------------------------------------------------------------------------|-----------|
| R.C(+71.04)C(+57.02)DELNEMENTQR.C                        | Y    | 63.47  | 1711.6600 | 13     | 1.0  | 856.8381 | 2 | 27.64 | 31       | F31:1283 | OB5942 H6 Ro.raw | 2.8007E5            | 3        | 3                       | 79    | 91  | Carbamidomethylation                | C1:Pro pionamide:10.11;C2:Carbamidomethylation:100.00                                                                   | PEAKS PTM |
| R.C(+57.02)DLDVSGGR.C                                    | Y    | 63.35  | 977.4236  | 9      | -0.5 | 489.7189 | 2 | 24.23 | 33       | F33:1121 | OB5944 H6 Ro.raw | 8.8623E2            | 1        | 1                       | 136   | 144 | Carbamidomethylation                | C1:Carbamidomethylation:1000.00                                                                                         | PEAKS DB  |
| R.C(+57.02)M(+15.99)C(+57.02)EALQQIMENQC(+57.02)DRLQDR.Q | Y    | 60.71  | 2613.0862 | 20     | 1.4  | 872.0372 | 3 | 31.19 | 32       | F32:1576 | OB5943 H6 Ro.raw | 5.7636E5            | 5        | 5                       | 92    | 111 | Carbamidomethylation; Oxidation (M) | C1:Carbamidomethylation:1000.00;M2:Oxidation (M):89.48;C3:Carbamidomethylation:1000.00;C14:Carbamidomethylation:1000.00 | PEAKS DB  |
| R.Q(-17.03)MVQQFKR.E                                     | Y    | 60.42  | 1046.5331 | 8      | 0.0  | 524.2738 | 2 | 27.84 | 32       | F32:1322 | OB5943 H6 Ro.raw | 3.5192E5            | 3        | 3                       | 112   | 119 | Pyro-glu from Q                     | Q1:Pyro-glu from Q:1000.00                                                                                              | PEAKS PTM |
| R.C(+71.04)MC(+57.02)EALQQIMENQC(+57.02)DRLQDR.Q         | Y    | 60.30  | 2611.1069 | 20     | 1.1  | 871.3772 | 3 | 33.49 | 31       | F31:1647 | OB5942 H6 Ro.raw | 6.2487E5            | 2        | 2                       | 92    | 111 | Propionamide; Carbamidomethylation  | C1:Pro pionamide:20.41;C3:Carbamidomethylation:100.00;C14:Carbamidomethylation:1000.00                                  | PEAKS PTM |
| R.C(+57.02)(+28.03)C(+57.02)DELNEMENTQR.C                | Y    | 57.63  | 1725.6757 | 13     | 1.0  | 863.8460 | 2 | 28.03 | 32       | F32:1316 | OB5943 H6 Ro.raw | 1.6949E4            | 1        | 1                       | 79    | 91  | Carbamidomethylation                | C1:Carbamidomethylation:1000.00;C1:Et hylatio n:18.53;C2:Carbamidomethylation:1000.00                                   | PEAKS PTM |
| R.ELMNLPPQC(+57.02)NFRAPQR.C                             | Y    | 56.72  | 2000.9673 | 16     | 0.5  | 667.9967 | 3 | 30.28 | 35       | F35:1430 | OB5946 H2 Ro.raw | 1.0432E5            | 5        | 5                       | 120   | 135 | Carbamidomethylation                | C9:Carbamidomethylation:1000.00                                                                                         | PEAKS DB  |
| R.ELMNLPPQC(+57.02)NF(+31.99)R.A                         | Y    | 49.69  | 1580.7075 | 12     | -9.5 | 791.3535 | 2 | 31.67 | 31       | F31:1538 | OB5942 H6 Ro.raw | 0                   | 0        | 0                       | 120   | 131 | Carbamidomethylation                | C9:Carbamidomethylation:1000.00;F11:                                                                                    | PEAKS PTM |
| total 46 peptides                                        |      |        |           |        |      |          |   |       |          |          |                  |                     |          |                         |       |     |                                     |                                                                                                                         |           |

| Peptide                                   | Uniq | -10lgP | Mass      | Length | ppm  | m/z      | z | RT    | Fraction | Scan     | Source File      | Area Roasted in gel | #Feature | #Feature Roasted in gel | Start | End | PTM                                    | AScore                                                                                      | Found By  |
|-------------------------------------------|------|--------|-----------|--------|------|----------|---|-------|----------|----------|------------------|---------------------|----------|-------------------------|-------|-----|----------------------------------------|---------------------------------------------------------------------------------------------|-----------|
|                                           |      |        |           |        |      |          |   |       |          |          |                  |                     |          |                         |       |     |                                        | Dihydroxy:0.00                                                                              |           |
| R.ELMNLPQQC(+57.02)NFR(+14.02).A          | Y    | 49.60  | 1562.7334 | 12     | 0.3  | 782.3742 | 2 | 31.27 | 33       | F33:1519 | OB5944 H6 Ro.raw | 2.0625E5            | 3        | 3                       | 120   | 131 | Carbamidomethylation; Methylation(KR)  | C9:Carbamido methylation:1000.00;R12: Methylation(KR):1000.00                               | PEAKS PTM |
| R.C(+57.02)C(+57.02)DELN(+.98)EMENTQR.C   | Y    | 49.50  | 1698.6284 | 13     | -1.6 | 850.3201 | 2 | 29.09 | 31       | F31:1387 | OB5942 H6 Ro.raw | 0                   | 0        | 0                       | 79    | 91  | Carbamidomethylation; Deamidation (NQ) | C1:Carbamido methylation:1000.00;C2:Carbamidomethylation:1000.00;N6:Deamidation (NQ):31.56  | PEAKS DB  |
| R.IM(+15.99)GE(+57.02)QEYDSYDIR.S         | Y    | 48.79  | 1818.7729 | 14     | 0.3  | 910.3940 | 2 | 29.25 | 32       | F32:1394 | OB5943 H6 Ro.raw | 2.5217E3            | 1        | 1                       | 55    | 68  | Oxidation (M)                          | M2:Oxidation (M):1000.00;E4:Carbamido methylation (DHKE, X@N-term):0.00                     | PEAKS PTM |
| R.ELM(-48.00)NLPQQC(+57.02)NFR.A          | Y    | 48.30  | 1500.7144 | 12     | -0.1 | 501.2454 | 3 | 27.84 | 32       | F32:1311 | OB5943 H6 Ro.raw | 2.9967E5            | 2        | 2                       | 120   | 131 | Dethiomethyl; Carbamidomethylation     | M3:Det hiomet hyl:1000.00;C9:Carbamido methylation:1000.00                                  | PEAKS PTM |
| R.QMVQQFK.R                               | Y    | 48.24  | 907.4586  | 7      | -0.6 | 454.7363 | 2 | 25.61 | 33       | F33:1183 | OB5944 H6 Ro.raw | 8.0264E3            | 2        | 2                       | 112   | 118 |                                        |                                                                                             | PEAKS DB  |
| R.ELMNLPQQC(+57.02)N(+.98)FRAPQR.C        | Y    | 47.04  | 2001.9513 | 16     | 1.0  | 668.3250 | 3 | 30.88 | 32       | F32:1490 | OB5943 H6 Ro.raw | 0                   | 0        | 0                       | 120   | 135 | Carbamidomethylation; Deamidation (NQ) | C9:Carbamido methylation:1000.00;N10: Deamidation (NQ):24.24                                | PEAKS DB  |
| R.C(+57.02)C(+57.02)DELN(-17.03)EMENTQR.C | Y    | 44.87  | 1680.6178 | 13     | 1.0  | 841.3170 | 2 | 32.29 | 32       | F32:1575 | OB5943 H6 Ro.raw | 3.9042E4            | 2        | 2                       | 79    | 91  | Carbamidomethylation; Ammonia-loss (N) | C1:Carbamido methylation:1000.00;C2:Carbamidomethylation:1000.00;N6:Ammonia-loss (N):115.18 | PEAKS PTM |
| total 46 peptides                         |      |        |           |        |      |          |   |       |          |          |                  |                     |          |                         |       |     |                                        |                                                                                             |           |

| Peptide                                                          | Uniq | -10lgP | Mass      | Length | ppm  | m/z      | z | RT    | Fraction | Scan     | Source File      | Area Roasted in gel | #Feature | #Feature Roasted in gel | Start | End | PTM                                                                                       | AScore                                                                                                                                               | Found By  |
|------------------------------------------------------------------|------|--------|-----------|--------|------|----------|---|-------|----------|----------|------------------|---------------------|----------|-------------------------|-------|-----|-------------------------------------------------------------------------------------------|------------------------------------------------------------------------------------------------------------------------------------------------------|-----------|
| R.IMGEQEQYDSYDIRSTR.S                                            | Y    | 44.57  | 2089.9375 | 17     | 2.0  | 697.6545 | 3 | 28.94 | 31       | F31:1381 | OB5942 H6 Ro.raw | 4.9618E4            | 2        | 2                       | 55    | 71  |                                                                                           |                                                                                                                                                      | PEAKS DB  |
| R.C(+57.02)M(+15.99)C(+57.02)EALQQIM(+15.99)ENQC(+57.02)DRLQDR.Q | Y    | 43.42  | 2629.0811 | 20     | 2.0  | 877.3694 | 3 | 29.88 | 32       | F32:1425 | OB5943 H6 Ro.raw | 7.9642E3            | 1        | 1                       | 92    | 111 | Carbamidomethylation; Oxidation (M)                                                       | C1:Carbamido methylation:1000.00;M2:Oxidation (M):1000.00;C3:Carbamidomethylation:1000.00;M10:Oxidation (M):1000.00;C14:Carbamidomethylation:1000.00 | PEAKS DB  |
| R.VNLKPC(+57.02)EQHIM(+15.99)QR.I                                | Y    | 43.11  | 1667.8236 | 13     | 0.6  | 556.9488 | 3 | 26.91 | 31       | F31:1258 | OB5942 H6 Ro.raw | 2.1143E4            | 1        | 1                       | 42    | 54  | Carbamidomethylation; Oxidation (M)                                                       | C6:Carbamido methylation:1000.00;M11:Oxidation (M):1000.00                                                                                           | PEAKS DB  |
| K.RELMNLPQQC(+57.02)NFR.A                                        | Y    | 42.73  | 1704.8188 | 13     | 0.8  | 569.2807 | 3 | 29.89 | 31       | F31:1434 | OB5942 H6 Ro.raw | 0                   | 0        | 0                       | 119   | 131 | Carbamidomethylation                                                                      | C10:Carbamidomethylation:1000.00                                                                                                                     | PEAKS DB  |
| R.VNLK(+41.03)PC(+57.02)EQHIMQR.I                                | Y    | 39.06  | 1692.8552 | 13     | 3.3  | 565.2942 | 3 | 29.51 | 32       | F32:1408 | OB5943 H6 Ro.raw | 4.1722E3            | 1        | 1                       | 42    | 54  | Amidination of lysines or N-terminal amines with methyl acetimidate; Carbamidomethylation | K4:Amidination of lysines or N-terminal amines with methyl acetimidate:38.16; C6:Carbamido methylation:1000.00                                       | PEAKS PTM |
| R.IMGE(+17.03)QEQYDSYDIR.S                                       | Y    | 37.70  | 1762.7832 | 14     | -4.0 | 882.3953 | 2 | 30.83 | 31       | F31:1488 | OB5942 H6 Ro.raw | 0                   | 0        | 0                       | 55    | 68  |                                                                                           | E4:Replacement of proton with ammonium ion:18.53                                                                                                     | PEAKS PTM |
| R.IMGEQEQY(-18.01)DSYDIR.S                                       | Y    | 36.74  | 1727.7461 | 14     | 3.4  | 864.8833 | 2 | 30.78 | 32       | F32:1484 | OB5943 H6 Ro.raw | 0                   | 0        | 0                       | 55    | 68  |                                                                                           | Y8:Dehydration:0.00                                                                                                                                  | PEAKS PTM |
| R.IM(+15.99)GEQEQYDSYDIRSTR.S                                    | Y    | 35.70  | 2105.9324 | 17     | -1.9 | 702.9834 | 3 | 27.45 | 31       | F31:1288 | OB5942 H6 Ro.raw | 2.3858E3            | 1        | 1                       | 55    | 71  | Oxidation (M)                                                                             | M2:Oxidation (M):1000.00                                                                                                                             | PEAKS DB  |
| R.ELM(+15.99)NLPQQC(+57.02)NFR(+14.02).A                         | Y    | 35.08  | 1578.7283 | 12     | 1.8  | 790.3729 | 2 | 29.10 | 33       | F33:1390 | OB5944 H6 Ro.raw | 0                   | 0        | 0                       | 120   | 131 | Oxidation (M); Carbamidomethylation; Methylation(KR)                                      | M3:Oxidation (M):10                                                                                                                                  | PEAKS PTM |
| total 46 peptides                                                |      |        |           |        |      |          |   |       |          |          |                  |                     |          |                         |       |     |                                                                                           |                                                                                                                                                      |           |



| Peptide                                                | Uniq | -10lgP | Mass      | Length | ppm  | m/z      | z | RT    | Fraction | Scan     | Source File       | Area Roasted in gel | #Feature | #Feature Roasted in gel | Start | End | PTM                                                 | AScore                                                                                                                     | Found By  |
|--------------------------------------------------------|------|--------|-----------|--------|------|----------|---|-------|----------|----------|-------------------|---------------------|----------|-------------------------|-------|-----|-----------------------------------------------------|----------------------------------------------------------------------------------------------------------------------------|-----------|
|                                                        |      |        |           |        |      |          |   |       |          |          |                   |                     |          |                         |       |     |                                                     | 00.00; C9:Carbamido methylation:1000.00;R12: Methylation(KR):1000.00                                                       |           |
| R.QMVQQFKR.E                                           | Y    | 34.38  | 1063.5597 | 8      | 0.9  | 532.7876 | 2 | 26.84 | 32       | F32:1239 | OB5943 H6 Ro.raw  | 1.9987E4            | 2        | 2                       | 112   | 119 |                                                     |                                                                                                                            | PEAKS DB  |
| R.C(+57.02)C(+57.02)D(-18.01)ELN(+.98)EMENTQR.C        | Y    | 33.99  | 1680.6178 | 13     | 1.7  | 841.3176 | 2 | 31.98 | 31       | F31:1599 | OB5942 H6 Ro.raw  | 2.4089E4            | 1        | 1                       | 79    | 91  | Carbamidomethylation; Dehydration; Deamidation (NQ) | C1:Carbamido methylation:1000.00;C2:Carbamidomethylation:1000.00;D3:Dehydration:62.90;N6:Deamidation (NQ):83.17            | PEAKS PTM |
| R.I(+57.02)M(+15.99)GEQEYDSYDIR.S                      | Y    | 33.09  | 1818.7729 | 14     | 0.8  | 910.3945 | 2 | 28.84 | 31       | F31:1372 | OB5942 H6 Ro.raw  | 0                   | 0        | 0                       | 55    | 68  | Oxidation (M)                                       | I1:Carbamido methylation (DHKE, X@N-term):17.32;M2:Oxidation (M):1000.00                                                   | PEAKS PTM |
| R.IMGEQE(+53.92)QYDSYDIR.S                             | Y    | 32.96  | 1799.6759 | 14     | -2.3 | 600.8979 | 3 | 30.20 | 32       | F32:1450 | OB5943 H6 Ro.raw  | 0                   | 0        | 0                       | 55    | 68  |                                                     | E6:Replacement of 2 protons by iron:14.63                                                                                  | PEAKS PTM |
| R.C(+57.02)MC(+57.02)EALQQ(+.98)IMENQC(+57.02)DRLQDR.Q | Y    | 32.01  | 2598.0754 | 20     | -6.2 | 867.0270 | 3 | 33.99 | 36       | F36:1638 | OB5948 H3B Ro.raw | 0                   | 0        | 0                       | 92    | 111 | Carbamidomethylation                                | C1:Carbamido methylation:1000.00;C3:Carbamidomethylation:1000.00;Q8:Deamidation (NQ):0.00;C14:Carbamidomethylation:1000.00 | PEAKS DB  |
| R.VNLKPC(+57.02)E(+14.02)QHIMQR.I                      | Y    | 31.29  | 1665.8444 | 13     | -0.4 | 556.2885 | 3 | 28.77 | 32       | F32:1372 | OB5943 H6 Ro.raw  | 2.0373E4            | 1        | 1                       | 42    | 54  | Carbamidomethylation; Methylation(others)           | C6:Carbamido methylation:1000.00;E7:M                                                                                      | PEAKS PTM |
| total 46 peptides                                      |      |        |           |        |      |          |   |       |          |          |                   |                     |          |                         |       |     |                                                     |                                                                                                                            |           |

| Peptide                      | Uniq | -10lgP | Mass      | Length | ppm | m/z      | z | RT    | Fraction | Scan     | Source File      | Area Roasted in gel | #Feature | #Feature Roasted in gel | Start | End | PTM                            | AScore                                                     | Found By  |
|------------------------------|------|--------|-----------|--------|-----|----------|---|-------|----------|----------|------------------|---------------------|----------|-------------------------|-------|-----|--------------------------------|------------------------------------------------------------|-----------|
|                              |      |        |           |        |     |          |   |       |          |          |                  |                     |          |                         |       |     |                                | ethylati on(othe rs):55.92                                 |           |
| R.Q(-17.03)M(+15.99)VQQFKR.E | Y    | 31.12  | 1062.5281 | 8      | 3.0 | 532.2729 | 2 | 25.67 | 32       | F32:1189 | OB5943 H6 Ro.raw | 0                   | 0        | 0                       | 112   | 119 | Pyro-glu from Q; Oxidation (M) | Q1:Pyr o-glu fr om Q:1 000.0 0;M2:O xidatio n (M):1 000.00 | PEAKS PTM |
| R.IMGEQEY(+125.90)DSYDIR.S   | Y    | 29.13  | 1871.6533 | 14     | 2.0 | 936.8358 | 2 | 32.29 | 32       | F32:1560 | OB5943 H6 Ro.raw | 6.88E3              | 1        | 1                       | 55    | 68  | Iodination                     | Y8:Iodi nation: 41.59                                      | PEAKS PTM |
| total 46 peptides            |      |        |           |        |     |          |   |       |          |          |                  |                     |          |                         |       |     |                                |                                                            |           |

A1E2B1|A1E2B1\_ARAHY

back to list

| Protein Coverage | Supporting Peptides |

Protein Coverage:

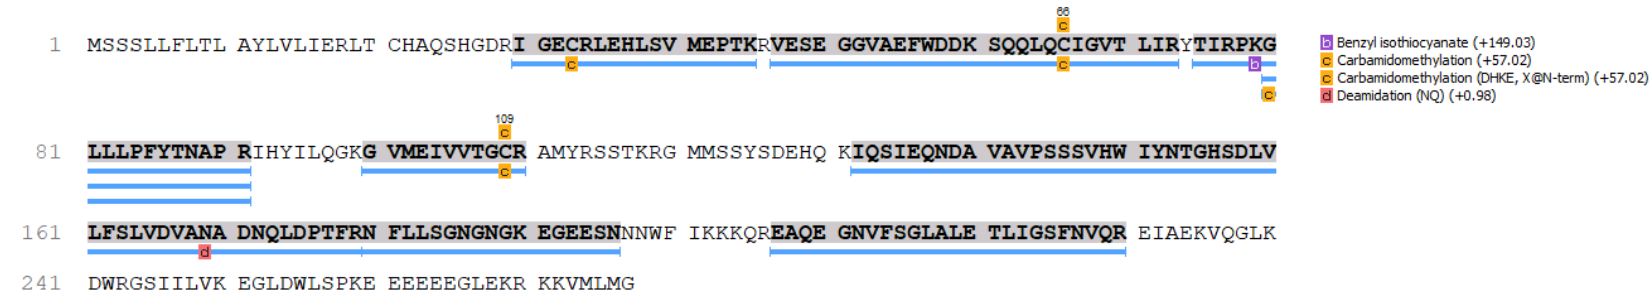

Supporting Peptides:

| Peptide                                 | Uniq | -10lgP | Mass      | Length | ppm  | m/z       | z | RT    | Fraction | Scan     | Source File       | Area Roasted in gel | #Feature | #Feature Roasted in gel | Start | End | PTM                                   | AScore                                          | Found By  |
|-----------------------------------------|------|--------|-----------|--------|------|-----------|---|-------|----------|----------|-------------------|---------------------|----------|-------------------------|-------|-----|---------------------------------------|-------------------------------------------------|-----------|
| K.GLLLPFYTNAPR.I                        | Y    | 109.84 | 1360.7502 | 12     | 2.1  | 681.3839  | 2 | 35.28 | 34       | F34:1731 | OB5945 H2 Ro.raw  | 8.7006E5            | 3        | 3                       | 80    | 91  |                                       |                                                 | PEAKS DB  |
| K.GVMEIVVTGC(+57.02)R.A                 | Y    | 101.91 | 1219.6053 | 11     | 0.3  | 610.8101  | 2 | 31.33 | 34       | F34:1490 | OB5945 H2 Ro.raw  | 1.3757E5            | 2        | 2                       | 100   | 110 | Carbamidomethylation                  | C10:Carbamidomethylation:1 000.00               | PEAKS DB  |
| R.VESEGGVAEFWDDKSQQLQC(+57.02)IGVTLIR.Y | Y    | 79.49  | 3063.4971 | 27     | 2.5  | 1022.1755 | 3 | 37.32 | 29       | F29:1703 | OB5922 H2 Ro.raw  | 5.5365E5            | 3        | 3                       | 47    | 73  | Carbamidomethylation                  | C20:Carbamidomethylation:1 000.00               | PEAKS DB  |
| R.EAQEGNVFSGLALETIGSFNVQR.E             | Y    | 78.67  | 2578.3027 | 24     | 3.8  | 1290.1636 | 2 | 40.50 | 36       | F36:2018 | OB5948 H3B Ro.raw | 1.1946E5            | 3        | 3                       | 207   | 230 |                                       |                                                 | PEAKS DB  |
| Y.TIRPK(+149.03)GLLLPFYTNAPR.I          | Y    | 42.74  | 2105.1606 | 17     | -7.1 | 702.7225  | 3 | 34.93 | 34       | F34:1700 | OB5945 H2 Ro.raw  | 5.1304E4            | 1        | 1                       | 75    | 91  | Benzyl isothiocyanate                 | K5:Ben zyl isot hiocyan ate:22.37               | PEAKS PTM |
| K.G(+57.02)LLLPFYTNAPR.I                | Y    | 42.29  | 1417.7717 | 12     | 3.7  | 709.8958  | 2 | 35.99 | 29       | F29:1630 | OB5922 H2 Ro.raw  | 0                   | 0        | 0                       | 80    | 91  | Carbamidomethylation (DHKE, X@N-term) | G1:Car bamido methyl ation (DHKE, X@N-te rm):10 | PEAKS PTM |
| total 9 peptides                        |      |        |           |        |      |           |   |       |          |          |                   |                     |          |                         |       |     |                                       |                                                 |           |

| Peptide                                                    | Uniq | -10lgP | Mass      | Length | ppm | m/z       | z | RT    | Fraction | Scan     | Source File      | Area Roasted in gel | #Feature | #Feature Roasted in gel | Start | End | PTM                  | AScore                          | Found By |
|------------------------------------------------------------|------|--------|-----------|--------|-----|-----------|---|-------|----------|----------|------------------|---------------------|----------|-------------------------|-------|-----|----------------------|---------------------------------|----------|
|                                                            |      |        |           |        |     |           |   |       |          |          |                  |                     |          |                         |       |     |                      | 00.00                           |          |
| R.NFLLSGN(+.98)GNGKEGEESN.N                                | Y    | 41.96  | 1765.7754 | 17     | 2.2 | 883.8969  | 2 | 30.89 | 29       | F29:1327 | OB5922 H2 Ro.raw | 0                   | 0        | 0                       | 180   | 196 |                      | N7:Deamidation (NQ):18.53       | PEAKS DB |
| R.IGEC(+57.02)RLEHLSVMEPTK.R                               | Y    | 40.45  | 1897.9390 | 16     | 1.1 | 633.6543  | 3 | 31.15 | 34       | F34:1494 | OB5945 H2 Ro.raw | 1.9364E4            | 1        | 1                       | 30    | 45  | Carbamidomethylation | C4:Carbamidomethylation:1000.00 | PEAKS DB |
| K.IQSIEQNDAVAVPSSSVHWIYNTGHSDLVLFSLVDVAN(+.98)ADNQLDPTFR.N | Y    | 30.21  | 5282.5796 | 48     | 8.2 | 1321.6630 | 4 | 39.07 | 34       | F34:1954 | OB5945 H2 Ro.raw | 4.1788E4            | 1        | 1                       | 132   | 179 | Deamidation (NQ)     | N38:Deamidation (NQ):22.45      | PEAKS DB |
| total 9 peptides                                           |      |        |           |        |     |           |   |       |          |          |                  |                     |          |                         |       |     |                      |                                 |          |

sp|Q6PSU2|CONG7\_ARAHY

back to list

| [Protein Coverage](#) | [Supporting Peptides](#) |

Protein Coverage:

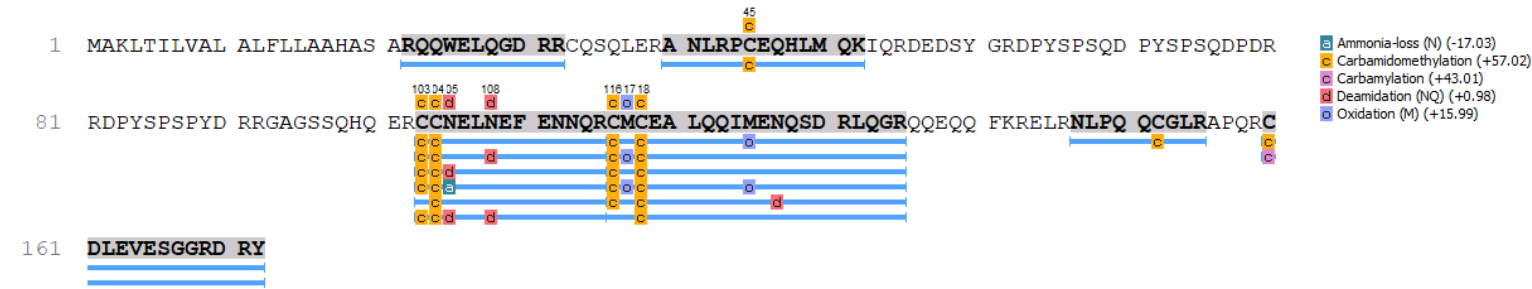

| Peptide                                          | Uniq | -10lgP | Mass      | Length | ppm  | m/z      | z | RT    | Fraction | Scan     | Source File      | Area Roasted in gel | #Feature | #Feature Roasted in gel | Start | End | PTM                                    | AScore                                                                                     | Found By  |
|--------------------------------------------------|------|--------|-----------|--------|------|----------|---|-------|----------|----------|------------------|---------------------|----------|-------------------------|-------|-----|----------------------------------------|--------------------------------------------------------------------------------------------|-----------|
|                                                  |      |        |           |        |      |          |   |       |          |          |                  |                     |          |                         |       |     |                                        | 0.00                                                                                       |           |
| R.C(+57.02)M(+15.99)C(+57.02)EALQQIMENQSDRLQGR.Q | Y    | 70.68  | 2482.0820 | 20     | 2.7  | 828.3702 | 3 | 32.38 | 29       | F29:1416 | OB5922 H2 Ro.raw | 6.6021E5            | 6        | 6                       | 116   | 135 | Carbamidomethylation; Oxidation (M)    | C1:Carbamido methylation:1000.00;M2:Oxidation (M):113.22;C3:Carbamido methylation:1000.00  | PEAKS DB  |
| R.ANLRPC(+57.02)EQHLMQK.I                        | Y    | 69.33  | 1623.7974 | 13     | 2.9  | 542.2747 | 3 | 27.48 | 33       | F33:1292 | OB5944 H6 Ro.raw | 1.3154E4            | 2        | 2                       | 40    | 52  | Carbamidomethylation                   | C6:Carbamido methylation:1000.00                                                           | PEAKS DB  |
| R.C(+57.02)MC(+57.02)EALQQIM(+15.99)ENQSDRLQGR.Q | Y    | 68.85  | 2482.0820 | 20     | 2.2  | 828.3698 | 3 | 31.37 | 29       | F29:1354 | OB5922 H2 Ro.raw | 5.4499E5            | 7        | 7                       | 116   | 135 | Carbamidomethylation; Oxidation (M)    | C1:Carbamido methylation:1000.00;C3:Carbamidomethylation:1000.00;M10:Oxidation (M):99.62   | PEAKS DB  |
| R.C(+57.02)DLEVESGGRDRI                          | Y    | 66.83  | 1554.6732 | 13     | -0.6 | 778.3434 | 2 | 27.14 | 32       | F32:1269 | OB5943 H6 Ro.raw | 1.1586E4            | 3        | 3                       | 160   | 172 | Carbamidomethylation                   | C1:Carbamido methylation:1000.00                                                           | PEAKS DB  |
| R.C(+57.02)C(+57.02)N(+.98)ELNEFENNQR.C          | Y    | 60.97  | 1726.6675 | 13     | -3.2 | 864.3383 | 2 | 28.65 | 32       | F32:1358 | OB5943 H6 Ro.raw | 0                   | 0        | 0                       | 103   | 115 | Carbamidomethylation; Deamidation (NQ) | C1:Carbamido methylation:1000.00;C2:Carbamidomethylation:1000.00;N3:Deamidation (NQ):22.69 | PEAKS DB  |
| R.C(+57.02)C(+57.02)N(-17.03)ELNEFENNQR.C        | Y    | 50.14  | 1708.6570 | 13     | 1.1  | 855.3367 | 2 | 32.90 | 32       | F32:1610 | OB5943 H6 Ro.raw | 1.9004E4            | 2        | 2                       | 103   | 115 | Carbamidomethylation; Ammonia-loss (N) | C1:Carbamido methylation:1000.00;C2:Carbamidomethylation:1000.00;N3:Ammonia-loss (N):67.21 | PEAKS PTM |
| R.NLPQQC(+57.02)GLR.A                            | Y    | 50.09  | 1084.5448 | 9      | -1.6 | 543.2788 | 2 | 25.64 | 32       | F32:1178 | OB5943 H6 Ro.raw | 1.8503E4            | 3        | 3                       | 147   | 155 | Carbamidomethylation                   | C6:Carbamido methylation:1000.00                                                           | PEAKS DB  |
| R.C(+57.02)C(+57.02)NELN(+.98)EFENNQR.C          | Y    | 49.85  | 1726.6675 | 13     | -3.5 | 864.3380 | 2 | 28.36 | 33       | F33:1346 | OB5944 H6        | 0                   | 0        | 0                       | 103   | 115 | Carbamidomethylation; Deamidation (NQ) | C1:Carbamido                                                                               | PEAKS DB  |
| total 18 peptides                                |      |        |           |        |      |          |   |       |          |          |                  |                     |          |                         |       |     |                                        |                                                                                            |           |

| Peptide                                                  | Uniq | -10lgP | Mass      | Length | ppm  | m/z       | z | RT    | Fraction | Scan     | Source File       | Area Roasted in gel | #Feature | #Feature Roasted in gel | Start | End | PTM                                    | AScore                                                                                                             | Found By  |
|----------------------------------------------------------|------|--------|-----------|--------|------|-----------|---|-------|----------|----------|-------------------|---------------------|----------|-------------------------|-------|-----|----------------------------------------|--------------------------------------------------------------------------------------------------------------------|-----------|
|                                                          |      |        |           |        |      |           |   |       |          |          | Ro.raw            |                     |          |                         |       |     |                                        | methylation:1000.00;C2:C carbamidomethylation:1000.00;N6:Deamidation (NQ):26.38                                    |           |
| R.C(+71.04)MC(+57.02)EALQQIMENQSDRLQGR.Q                 | Y    | 47.99  | 2480.1028 | 20     | 0.2  | 827.7084  | 3 | 33.64 | 35       | F35:1632 | OB5946 H2 Ro.raw  | 1.3204E5            | 1        | 1                       | 116   | 135 | Carbamidomethylation                   | C1:Pro pionamide:11.10;C3:Carbamidomethylation:1000.00                                                             | PEAKS PTM |
| R.C(+57.02)M(+15.99)C(+57.02)EALQQIM(+15.99)ENQSDRLQGR.Q | Y    | 47.72  | 2498.0771 | 20     | 1.5  | 833.7009  | 3 | 30.07 | 37       | F37:1419 | OB5949 H3B Ro.raw | 1.3961E5            | 5        | 5                       | 116   | 135 | Carbamidomethylation; Oxidation (M)    | C1:Carbamidomethylation:1000.00;M2:Oxidation (M):1000.00;C3:Carbamidomethylation:1000.00;M10:Oxidation (M):1000.00 | PEAKS DB  |
| A.RQQWELQGDRR.C                                          | Y    | 47.67  | 1470.7440 | 11     | -0.4 | 491.2551  | 3 | 29.55 | 29       | F29:1249 | OB5922 H2 Ro.raw  | 2.0657E4            | 3        | 3                       | 22    | 32  |                                        |                                                                                                                    | PEAKS DB  |
| R.C(+57.02)MC(+57.02)EALQQIMEN(+.98)QSDRLQGR.Q           | Y    | 44.70  | 2467.0713 | 20     | 2.3  | 1234.5490 | 2 | 34.84 | 30       | F30:1538 | OB5926 H3B Ro.raw | 0                   | 0        | 0                       | 116   | 135 | Carbamidomethylation; Deamidation (NQ) | C1:Carbamidomethylation:1000.00;C3:Carbamidomethylation:1000.00;N12:Deamidation (NQ):27.42                         | PEAKS DB  |
| R.C(+57.02)C(+57.02)NELN(-17.03)EFENNQR.C                | Y    | 41.93  | 1708.6570 | 13     | 0.8  | 855.3364  | 2 | 32.73 | 36       | F36:1565 | OB5948 H3B Ro.raw | 0                   | 0        | 0                       | 103   | 115 | Carbamidomethylation                   | C1:Carbamidomethylation:1000.00;C2:C carbamidomethylation:1000.00;N6:Ammonia-loss (N):0.00                         | PEAKS PTM |
| R.C(+57.02)C(+57.02)N(+.98)ELN(+.98)EFENNQR.C            | Y    | 31.03  | 1727.6515 | 13     | 8.5  | 864.8404  | 2 | 28.91 | 31       | F31:1376 | OB5942 H6 Ro.raw  | 0                   | 0        | 0                       | 103   | 115 | Carbamidomethylation; Deamidation (NQ) | C1:Carbamidomethyl                                                                                                 | PEAKS DB  |
| total 18 peptides                                        |      |        |           |        |      |           |   |       |          |          |                   |                     |          |                         |       |     |                                        |                                                                                                                    |           |

| Peptide                 | Uniq | -10lgP | Mass      | Length | ppm | m/z      | z | RT    | Fraction | Scan     | Source File      | Area Roasted in gel | #Feature | #Feature Roasted in gel | Start | End | PTM           | AScore                                                                                              | Found By  |
|-------------------------|------|--------|-----------|--------|-----|----------|---|-------|----------|----------|------------------|---------------------|----------|-------------------------|-------|-----|---------------|-----------------------------------------------------------------------------------------------------|-----------|
|                         |      |        |           |        |     |          |   |       |          |          |                  |                     |          |                         |       |     |               | ation:1000.00;C2:C arbami domethylation:1000.00;N3:Deamidation (NQ):28.25;N6:Deamidation (NQ):42.78 |           |
| R.C(+43.01)DLEVESGGRDRY | Y    | 28.80  | 1540.6576 | 13     | 1.4 | 771.3372 | 2 | 26.82 | 33       | F33:1254 | OB5944 H6 Ro.raw | 0                   | 0        | 0                       | 160   | 172 | Carbamylation | C1:Carbamylation:1000.00                                                                            | PEAKS PTM |
| total 18 peptides       |      |        |           |        |     |          |   |       |          |          |                  |                     |          |                         |       |     |               |                                                                                                     |           |

E9LFE9|E9LFE9\_ARAHY

back to list

| Protein Coverage | Supporting Peptides |

Protein Coverage:

1MGKPVIKPLV VLLLSLILVS ECAAIHSQKR RMGQRVKLSL EECGELEKLE AIEPDYYRIE AEGGVTESWN HTNKMRLCAG

81VALVRRTVKP GGLVLPSYTN APQLMYVVG SGIQGMTIFF SCPESFEEPE EAGQEYREQH QKVHEIRGGD IIAIPAGIGY

161WFYNNGDVPL VVVILLHTNN VANQLGTLPR RFYIAGNTED EHGEGRREKS ISGRNVFSGI SLNLLAQVFG VRVETARKIQ

241GPDDKRKNIV MVGGRS

Deamidation (NQ) (+0.98)

N-Succinimidyl-2-morpholine acetate (+127.06)

Supporting Peptides:

| Peptide                                                | Uniq | -10lgP | Mass      | Length | ppm  | m/z       | z | RT    | Fraction | Scan     | Source File       | Area Roasted in gel | #Feature | #Feature Roasted in gel | Start | End | PTM                                 | AScore                                         | Found By  |
|--------------------------------------------------------|------|--------|-----------|--------|------|-----------|---|-------|----------|----------|-------------------|---------------------|----------|-------------------------|-------|-----|-------------------------------------|------------------------------------------------|-----------|
| R.NVFSGISLNLLAQVFGVR.V                                 | Y    | 119.29 | 1933.0785 | 18     | 2.9  | 967.5493  | 2 | 42.42 | 36       | F36:2125 | OB5948 H3B Ro.raw | 1.2301E5            | 3        | 3                       | 215   | 232 |                                     |                                                | PEAKS DB  |
| R.NVFSGISLNLLAQVFGVRVETAR.K                            | Y    | 83.20  | 2489.3755 | 23     | 0.1  | 830.8013  | 3 | 41.58 | 30       | F30:1917 | OB5926 H3B Ro.raw | 9.2573E5            | 4        | 4                       | 215   | 237 |                                     |                                                | PEAKS DB  |
| N.V(+127.06)FSGISLNLLAQVFGVR.V                         | Y    | 50.76  | 1946.0989 | 17     | -8.5 | 974.0485  | 2 | 40.88 | 36       | F36:2037 | OB5948 H3B Ro.raw | 1.4115E6            | 3        | 3                       | 216   | 232 | N-Succinimidyl-2-morpholine acetate | V1:N-Succinimidyl-2-morpholine acetate:1000.00 | PEAKS PTM |
| R.GGDIIAIPAGIGYWFYN(+.98)NGDVLPLVVVILLHTNNVANQLGTLPR.R | Y    | 30.43  | 4574.4326 | 43     | 7.0  | 1525.8328 | 3 | 44.05 | 30       | F30:2059 | OB5926 H3B Ro.raw | 3.5735E4            | 1        | 1                       | 148   | 190 | Deamidation (NQ)                    | N17:Deamidation (NQ):30.46                     | PEAKS DB  |
| total 4 peptides                                       |      |        |           |        |      |           |   |       |          |          |                   |                     |          |                         |       |     |                                     |                                                |           |

A0A0A6ZDP1|A0A0A6ZDP1\_ARAHY

back to list

| Protein Coverage | Supporting Peptides |

Protein Coverage:

1 MLVHYQIALF HLP RSSTTGL GIVEGLMTTV HSITATQKTV DGPSSKDWRG GRAASFNIIP SSTGAAKAVG KVLPSLNGKL  
81 TGMAFRVPTV DVSVDLTVR LEKPATYDEI KQAIKEESEG KLK**GILGYTE DDVSTDFVG DSR**SSIFDAK AGIALSKNFV  
161 KIVSWYDNEW GYSTRVVDLI VHIAKQ

Supporting Peptides:

| Peptide                 | Uniq | -10lgP | Mass      | Length | ppm  | m/z       | z | RT    | Fraction | Scan     | Source File       | Area Roasted in gel | #Feature | #Feature Roasted in gel | Start | End | PTM | AScore | Found By |
|-------------------------|------|--------|-----------|--------|------|-----------|---|-------|----------|----------|-------------------|---------------------|----------|-------------------------|-------|-----|-----|--------|----------|
| K.GILGYTEDDVSTDFVGDSR.S | Y    | 128.27 | 2143.9910 | 20     | -0.3 | 1073.0024 | 2 | 34.39 | 38       | F38:1661 | OB5951 H3A Ro.raw | 1.1161E4            | 1        | 1                       | 124   | 143 |     |        | PEAKS DB |
| total 1 peptides        |      |        |           |        |      |           |   |       |          |          |                   |                     |          |                         |       |     |     |        |          |

E5FHZ1|E5FHZ1\_ARAHYback to list

| Protein Coverage | Supporting Peptides |

Protein Coverage:

1 MSQEQHRRPE ESDPIKYGDV FNVSGELAQK PVKPEDAAMM QSAETRVLGK TQPGGAAAAM QSAATLNEQA GLVGHHDVNE  
81 VAGDRGVTVT DMQAPGRR**IV TESVGGQVVG QYVEPTPVQS SRASAV****ESA ITIGEAL**EAT AQTVGSKPVE QSDAAAIQAA  
161 **EVR**ATGSNVI QPGGLAAMAQ SAVAFNAGCR NPRDKIKLAD ILTGATAKLP ADKAATHQGC

Supporting Peptides:

| Peptide                            | Uniq | -10lgP | Mass      | Length | ppm | m/z       | z | RT    | Fraction | Scan     | Source File       | Area Roasted in gel | #Feature | #Feature Roasted in gel | Start | End | PTM | AScore                    | Found By |
|------------------------------------|------|--------|-----------|--------|-----|-----------|---|-------|----------|----------|-------------------|---------------------|----------|-------------------------|-------|-----|-----|---------------------------|----------|
| R.IVTESVGGQVVGQYVEPTPVQSSR.A       | Y    | 92.62  | 2515.2917 | 24     | 3.8 | 1258.6580 | 2 | 31.22 | 38       | F38:1476 | OB5951 H3A Ro.raw | 3.0299E4            | 1        | 1                       | 99    | 122 |     |                           | PEAKS DB |
| R.ESAITIGEAL                       | Y    | 70.43  | 3610.8325 | 36     | 2.4 | 1204.6210 | 3 | 35.92 | 38       | F38:1740 | OB5951 H3A Ro.raw | 8.9254E5            | 3        | 3                       | 128   | 163 |     |                           | PEAKS DB |
| R.IVTESVGGQVVGQYVEPTPVQ(+.98)SSR.A | Y    | 33.87  | 2516.2759 | 24     | 9.4 | 1259.1571 | 2 | 31.76 | 39       | F39:1505 | OB5952 H3A Ro.raw | 2.7069E4            | 1        | 1                       | 99    | 122 |     | Q21:Deamidation (NQ):0.00 | PEAKS DB |
| total 3 peptides                   |      |        |           |        |     |           |   |       |          |          |                   |                     |          |                         |       |     |     |                           |          |

N1NKG9|N1NKG9\_ARAHYback to list

| Protein Coverage | Supporting Peptides |

Protein Coverage:

1 MSQEQHRRPE ESDPIKYGDV FNVSGELAQK PVKPEDAAMM QSAETRVLGK TQPGGAAAAM QSAATLNEQA GLVGHHDVNE  
81 VAGDRGVTVT DMQAPGRR**IV TESVGGQVVG QYVEPTPVQS SRASAV****ESA ITIGEAL**EAT AQTVGSKPVE QSDAAAIQAA  
161 **EVR**ATGSNVI QPGGLAAMAQ SAVAFNAGCR NPRDKIKLAD ILTGATAKLP ADKAATHQDA EGVASAEARN NTGGTTPGGV  
241 AASVAAAAARL NENVNV

Supporting Peptides:

| Peptide                      | Uniq | -10lgP | Mass      | Length | ppm | m/z       | z | RT    | Fraction | Scan     | Source File       | Area Roasted in gel | #Feature | #Feature Roasted in gel | Start | End | PTM | AScore | Found By |
|------------------------------|------|--------|-----------|--------|-----|-----------|---|-------|----------|----------|-------------------|---------------------|----------|-------------------------|-------|-----|-----|--------|----------|
| R.IVTESVGGQVVGQYVEPTPVQSSR.A | Y    | 92.62  | 2515.2917 | 24     | 3.8 | 1258.6580 | 2 | 31.22 | 38       | F38:1476 | OB5951 H3A Ro.raw | 3.0299E4            | 1        | 1                       | 99    | 122 |     |        | PEAKS DB |
| R.ESAITIGEAL                 | Y    | 70.43  | 3610.8325 | 36     | 2.4 | 1204.6210 | 3 | 35.92 | 38       | F38:1740 | OB5951 H3A Ro.raw | 8.9254E5            | 3        | 3                       | 128   | 163 |     |        | PEAKS DB |
| total 3 peptides             |      |        |           |        |     |           |   |       |          |          |                   |                     |          |                         |       |     |     |        |          |

| Peptide                            | Uniq | -10lgP | Mass      | Length | ppm | m/z       | z | RT    | Fraction | Scan     | Source File       | Area Roasted in gel | #Feature | #Feature Roasted in gel | Start | End | PTM | AScore                    | Found By |
|------------------------------------|------|--------|-----------|--------|-----|-----------|---|-------|----------|----------|-------------------|---------------------|----------|-------------------------|-------|-----|-----|---------------------------|----------|
| R.IVTESVGQGVVQGYVEPTPVQ(+.98)SSR.A | Y    | 33.87  | 2516.2759 | 24     | 9.4 | 1259.1571 | 2 | 31.76 | 39       | F39:1505 | OB5952 H3A Ro.raw | 2.7069E4            | 1        | 1                       | 99    | 122 |     | Q21:Deamidation (NQ):0.00 | PEAKS DB |
| total 3 peptides                   |      |        |           |        |     |           |   |       |          |          |                   |                     |          |                         |       |     |     |                           |          |

E5FHY1|E5FHY1\_ARAHY

back to list

| Protein Coverage | Supporting Peptides |

Protein Coverage:

1 MASKQRQDLN EKAKQGETVV PGGTGGK**TLE AQEHLAEGRS** KGGQTRK**EQI GTEGYQEMGR** KGGLSTMEKS **GGERAEEEGV**

81 **EIDESKFATK** NQNK

Supporting Peptides:

| Peptide                   | Uniq | -10lgP | Mass      | Length | ppm | m/z      | z | RT    | Fraction | Scan     | Source File      | Area Roasted in gel | #Feature | #Feature Roasted in gel | Start | End | PTM | AScore | Found By |
|---------------------------|------|--------|-----------|--------|-----|----------|---|-------|----------|----------|------------------|---------------------|----------|-------------------------|-------|-----|-----|--------|----------|
| K.EQLGTEGYQEMGR.K         | N    | 61.85  | 1496.6565 | 13     | 0.6 | 749.3359 | 2 | 27.83 | 33       | F33:1314 | OB5944 H6 Ro.raw | 0                   | 0        | 0                       | 48    | 60  |     |        | PEAKS DB |
| K.SGGERAEEEGVEIDESKFATK.N | N    | 55.33  | 2267.0552 | 21     | 1.0 | 756.6931 | 3 | 28.68 | 32       | F32:1360 | OB5943 H6 Ro.raw | 1.288E4             | 2        | 2                       | 70    | 90  |     |        | PEAKS DB |
| K.TLEAQEHLAEGR.S          | Y    | 40.13  | 1352.6685 | 12     | 2.1 | 677.3429 | 2 | 26.59 | 32       | F32:1236 | OB5943 H6 Ro.raw | 0                   | 0        | 0                       | 28    | 39  |     |        | PEAKS DB |
| total 3 peptides          |      |        |           |        |     |          |   |       |          |          |                  |                     |          |                         |       |     |     |        |          |

E5FHY2|E5FHY2\_ARAHY

back to list

| Protein Coverage | Supporting Peptides |

Protein Coverage:

1 MASKQQKQEL DERAQGETV VPGGTGGK**SL EAQEHLAEGR** SKGGQTRR**EQ LGTEGYQEMG** RKGGFSTMEK **SGGERAEEEG**

81 **VEIDESKFVT** KKPQVVP

Supporting Peptides:

| Peptide                   | Uniq | -10lgP | Mass      | Length | ppm  | m/z      | z | RT    | Fraction | Scan     | Source File      | Area Roasted in gel | #Feature | #Feature Roasted in gel | Start | End | PTM | AScore | Found By |
|---------------------------|------|--------|-----------|--------|------|----------|---|-------|----------|----------|------------------|---------------------|----------|-------------------------|-------|-----|-----|--------|----------|
| R.EQLGTEGYQEMGR.K         | N    | 61.85  | 1496.6565 | 13     | 0.6  | 749.3359 | 2 | 27.83 | 33       | F33:1314 | OB5944 H6 Ro.raw | 0                   | 0        | 0                       | 49    | 61  |     |        | PEAKS DB |
| K.SLEAQEHLAEGR.S          | N    | 50.96  | 1338.6527 | 12     | -0.2 | 670.3335 | 2 | 26.22 | 31       | F31:1219 | OB5942 H6 Ro.raw | 3.9095E3            | 2        | 2                       | 29    | 40  |     |        | PEAKS DB |
| K.SGGERAEEEGVEIDESKFVTK.K | Y    | 45.08  | 2295.0867 | 21     | 0.9  | 766.0369 | 3 | 29.51 | 32       | F32:1403 | OB5943 H6 Ro.raw | 1.1991E4            | 1        | 1                       | 71    | 91  |     |        | PEAKS DB |
| total 3 peptides          |      |        |           |        |      |          |   |       |          |          |                  |                     |          |                         |       |     |     |        |          |

Q42515|Q42515\_ARAHY

back to list

| Protein Coverage | Supporting Peptides |

Protein Coverage:

1 MKFCNFFTFT LALIVVLQAL GASAD**DDAGTI ITQPLYNEFL** KHLTDSRCEA HGFYTYNAFV TAARAFFAFG TTGDDVTRKR

81 ELAAFFGQTS HETTGTTNA PDEFEWGYCF LREQTKEQHC DSTQAPCPAG KQYYGR**GPIQ LTSNSNYQLA GQAIK**ADLIN

161 NPDLVATDAV ISFKTAIWFV MTPQGNKPSC HDVITNAWRP TATDSAAGRA PGYGVITNII NGGIECGKGA NTNSNNRIGF

241 YKRYCDILKI GYGSNLDCAN QQHF



Supporting Peptides:

| Peptide                 | Uniq | -10lgP | Mass      | Length | ppm | m/z       | z | RT    | Fraction | Scan     | Source File       | Area Roasted in gel | #Feature | #Feature Roasted in gel | Start | End | PTM | AScore | Found By |
|-------------------------|------|--------|-----------|--------|-----|-----------|---|-------|----------|----------|-------------------|---------------------|----------|-------------------------|-------|-----|-----|--------|----------|
| A.DDAGTIITQPLYNEFLK.H   | Y    | 57.78  | 1936.9781 | 17     | 2.4 | 969.4987  | 2 | 37.23 | 37       | F37:1836 | OB5949 H3B Ro.raw | 2.7447E4            | 1        | 1                       | 25    | 41  |     |        | PEAKS DB |
| R.GPIQLTSNSNYQLAGQAIK.A | Y    | 53.96  | 2002.0483 | 19     | 5.5 | 1002.0396 | 2 | 31.80 | 30       | F30:1360 | OB5926 H3B Ro.raw | 0                   | 0        | 0                       | 137   | 155 |     |        | PEAKS DB |
| total 2 peptides        |      |        |           |        |     |           |   |       |          |          |                   |                     |          |                         |       |     |     |        |          |

B4UWB2|B4UWB2\_ARAHY

back to list

| [Protein Coverage](#) | [Supporting Peptides](#) |

Protein Coverage:

1 MKSSSSVIAA MICFAMVTGM AASAAEPVLD VTGQKLRSGV KYFILPVLRG RGGGLTVGSS VNSTCPIYVL QDKLEVTRGT

81 PVTFTPSTPN KDGVILTSTD LNINSTAPK CKESSVWRLL KVLGCVWFIS TDGVAGNPGV NTVVNWFKIE KDGKDYNLSE

161 CPSVCNCSTL CRALGIFTDS DGTKHLALSD QVPTFRSCSR RLN

Supporting Peptides:

| Peptide          | Uniq | -10lgP | Mass      | Length | ppm | m/z      | z | RT    | Fraction | Scan     | Source File      | Area Roasted in gel | #Feature | #Feature Roasted in gel | Start | End | PTM | AScore | Found By |
|------------------|------|--------|-----------|--------|-----|----------|---|-------|----------|----------|------------------|---------------------|----------|-------------------------|-------|-----|-----|--------|----------|
| K.YFILPVLR.G     | Y    | 83.50  | 1019.6168 | 8      | 0.0 | 510.8157 | 2 | 36.39 | 29       | F29:1656 | OB5922 H2 Ro.raw | 3.6559E4            | 2        | 2                       | 42    | 49  |     |        | PEAKS DB |
| total 1 peptides |      |        |           |        |     |          |   |       |          |          |                  |                     |          |                         |       |     |     |        |          |

A7LIS5|A7LIS5\_ARAHY

back to list

| [Protein Coverage](#) | [Supporting Peptides](#) |

Protein Coverage:

1 MKSMRIHVLF LFSLLSTIPH YSYASVNDFC VADLKGPDSP SGYNCKPVSA VTADDFVYSG LVAGDTNNTF KAAALTSAFVT

81 DFFPAVNGLGV SAARLDDIAKG GSIPMHTHPG ATELLIMVEG EITAGFMTPF ALYSKTLKPG DVFVFPQGQL HFQVNSGKKK

161 ATAFLAFSSA NPGAQLDLLL LFGNALSSDI VAQTTFLDID QVKKLKARFG GKNLNNHMSM

Supporting Peptides:

| Peptide                       | Uniq | -10lgP | Mass      | Length | ppm  | m/z       | z | RT    | Fraction | Scan     | Source File       | Area Roasted in gel | #Feature | #Feature Roasted in gel | Start | End | PTM | AScore | Found By |
|-------------------------------|------|--------|-----------|--------|------|-----------|---|-------|----------|----------|-------------------|---------------------|----------|-------------------------|-------|-----|-----|--------|----------|
| K.AAALTSAFVTDFFPAVNGLGVSAAR.L | Y    | 75.04  | 2234.1694 | 23     | -0.7 | 1118.0941 | 2 | 36.71 | 30       | F30:1645 | OB5926 H3B Ro.raw | 5.6415E3            | 1        | 1                       | 72    | 94  |     |        | PEAKS DB |
| total 1 peptides              |      |        |           |        |      |           |   |       |          |          |                   |                     |          |                         |       |     |     |        |          |

D4NXQ0|D4NXQ0\_ARAHY

back to list

| [Protein Coverage](#) | [Supporting Peptides](#) |

Protein Coverage:

1 MKSMRIHVLF LFSLLSTIPH YSYASVNDFC VADLKGPDSP SGYNCKPVSA VTADDFVYSG LVAGDTNNTF KAAALTSAFVT

81 DFFPAVNGLGV SAARLDDIAKG GSIPMHTHPG ATELLIMVEG EITAGFMTPF ALYSKTLKPG DVFVFPQGQL HFQVNSGKKK

161 ATAFLAFSSA NPGAQLDLLL LFGNALSSDI VAQTTFLDID QVKKLKARFG GKNLSKHMSM

Supporting Peptides:

| Peptide | Uniq | -10lgP | Mass | Length | ppm | m/z | z | RT | Fraction | Scan | Source File | Area Roasted in gel | #Feature | #Feature Roasted in gel | Start | End | PTM | AScore | Found By |
|---------|------|--------|------|--------|-----|-----|---|----|----------|------|-------------|---------------------|----------|-------------------------|-------|-----|-----|--------|----------|
|---------|------|--------|------|--------|-----|-----|---|----|----------|------|-------------|---------------------|----------|-------------------------|-------|-----|-----|--------|----------|

| Peptide                     | Uniq | -10lgP | Mass      | Length | ppm  | m/z       | z | RT    | Fraction | Scan     | Source File       | Area Roasted in gel | #Feature | #Feature Roasted in gel | Start | End | PTM | AScore | Found By |
|-----------------------------|------|--------|-----------|--------|------|-----------|---|-------|----------|----------|-------------------|---------------------|----------|-------------------------|-------|-----|-----|--------|----------|
| K.AALTSAFVTDTPAVNGLGVSAAR.L | Y    | 75.04  | 2234.1694 | 23     | -0.7 | 1118.0941 | 2 | 36.71 | 30       | F30:1645 | OB5926 H3B Ro.raw | 5.6415E3            | 1        | 1                       | 72    | 94  |     |        | PEAKS DB |
| total 1 peptides            |      |        |           |        |      |           |   |       |          |          |                   |                     |          |                         |       |     |     |        |          |

H6U596|H6U596\_ARAHY

back to list

| [Protein Coverage](#) | [Supporting Peptides](#) |

Protein Coverage:

1 SPLFPRIFGH EAGGIVESVG EGVTHLKPGD HALPVFTGEC GECPHCKSEE SNMCDLLRIN TDRGVMIHQD ESRFSIKGKP  
81 IYHFGVTSTF SEYTVVHAGC VAKINPEAPL DKVCVLSCGI CTGLGATINV AKPKPGSSVA VFGLGAVGLA AAEGARISGA  
161 SRIIGVDLVS SRFELAKKKFG VNEFV

Supporting Peptides:

| Peptide             | Uniq | -10lgP | Mass      | Length | ppm | m/z      | z | RT    | Fraction | Scan     | Source File       | Area Roasted in gel | #Feature | #Feature Roasted in gel | Start | End | PTM | AScore | Found By |
|---------------------|------|--------|-----------|--------|-----|----------|---|-------|----------|----------|-------------------|---------------------|----------|-------------------------|-------|-----|-----|--------|----------|
| R.IIGVDLVSSRFELAK.K | Y    | 54.03  | 1645.9402 | 15     | 2.4 | 823.9794 | 2 | 34.15 | 39       | F39:1640 | OB5952 H3A Ro.raw | 6.1243E3            | 1        | 1                       | 163   | 177 |     |        | PEAKS DB |
| total 1 peptides    |      |        |           |        |     |          |   |       |          |          |                   |                     |          |                         |       |     |     |        |          |

A0A191UJ92|A0A191UJ92\_ARAHY

back to list

| [Protein Coverage](#) | [Supporting Peptides](#) |

Protein Coverage:

1 MTRIKRGYIA RKRRTKIRLF TSSFRGAHSR LTRTISQQKI KALVSANRDR DRKKGFRGL WIHRINAIIG KNKKKQYNRY  
81 SNLLYMYKG QLLLNRRKIVA QMGILKGNCL LMIANEIIT

Supporting Peptides:

| Peptide          | Uniq | -10lgP | Mass      | Length | ppm  | m/z      | z | RT    | Fraction | Scan     | Source File      | Area Roasted in gel | #Feature | #Feature Roasted in gel | Start | End | PTM | AScore | Found By |
|------------------|------|--------|-----------|--------|------|----------|---|-------|----------|----------|------------------|---------------------|----------|-------------------------|-------|-----|-----|--------|----------|
| K.ALVSANRDR.D    | Y    | 38.97  | 1000.5414 | 9      | -7.6 | 501.2742 | 2 | 31.38 | 32       | F32:1526 | OB5943 H6 Ro.raw | 6.2701E3            | 1        | 1                       | 42    | 50  |     |        | PEAKS DB |
| total 1 peptides |      |        |           |        |      |          |   |       |          |          |                  |                     |          |                         |       |     |     |        |          |

E5FHZ2|E5FHZ2\_ARAHY

back to list

| [Protein Coverage](#) | [Supporting Peptides](#) |

Protein Coverage:

1 MSQQQTTPRRP QEEGQEHKDP IKYGDI FNVS GDLASEPIMP QDAALMQATE NQALGQTQKG GPASVMQSAA VTNVSAGLVG  
81 RGDVSSVAKD QGICVLESKI GVN RVITESV GEQVVGFEV PNVPMKTPGS ALDKDAITIG EALEATT LAP ASDKPVDQSD  
161 AAAIQAAEMR ATGKNEIQPG GLAAVAQSAA TKNLRTMGDF QKTTLSDVLT DAKEKLPSDK AVTREDAEGV IGAEIRNKAD  
241 MKTTPGGVAA SLAAAAATLNQ NKSSS

Supporting Peptides:

| Peptide                   | Uniq | -10lgP | Mass      | Length | ppm | m/z      | z | RT    | Fraction | Scan     | Source File       | Area Roasted in gel | #Feature | #Feature Roasted in gel | Start | End | PTM | AScore | Found By |
|---------------------------|------|--------|-----------|--------|-----|----------|---|-------|----------|----------|-------------------|---------------------|----------|-------------------------|-------|-----|-----|--------|----------|
| K.TTPGGVAASLAAAAATLNQNK.S | Y    | 38.10  | 1854.9799 | 20     | 2.9 | 928.4999 | 2 | 33.28 | 40       | F40:1592 | OB5953 H3A Ro.raw | 5.6109E3            | 1        | 1                       | 243   | 262 |     |        | PEAKS DB |
| total 1 peptides          |      |        |           |        |     |          |   |       |          |          |                   |                     |          |                         |       |     |     |        |          |

A0A075M4V7|A0A075M4V7\_ARAHY

back to list

| [Protein Coverage](#) | [Supporting Peptides](#) |

Protein Coverage:

1 PAFTTVNRRAS PAQANMVAPF SGLKSLGGFP VTRKTNDDITS VANNGGRVQC MQVWPPLGKK KFETLSYLPD LNEEQLRKEV

81 DYLLRKGWVP CLEFEVEYGF PYRENHRSPG YYDGRYWTMW KLPMFGCTDS GQVIKELQEA KAAPKAFV

Supporting Peptides:

| Peptide          | Uniq | -10lgP | Mass      | Length | ppm | m/z      | z | RT    | Fraction | Scan     | Source File       | Area Roasted in gel | #Feature | #Feature Roasted in gel | Start | End | PTM | AScore | Found By |
|------------------|------|--------|-----------|--------|-----|----------|---|-------|----------|----------|-------------------|---------------------|----------|-------------------------|-------|-----|-----|--------|----------|
| R.KEVDYLLR.K     | Y    | 33.37  | 1034.5760 | 8      | 0.2 | 518.2954 | 2 | 31.00 | 39       | F39:1454 | OB5952 H3A Ro.raw | 2.6266E4            | 1        | 1                       | 78    | 85  |     |        | PEAKS DB |
| total 1 peptides |      |        |           |        |     |          |   |       |          |          |                   |                     |          |                         |       |     |     |        |          |

A0A075M514|A0A075M514\_ARAHYback to list

| [Protein Coverage](#) | [Supporting Peptides](#) |

Protein Coverage:

1 PAFTAVNRRAS PAQANMVAPF SGLKSLGGFP VTRKTNDDITS VANNGGRVQC MQVWPPLGKK KFETLSYLPD LNEEQLRKEV

81 DYLLRKGWVP CLEFEVEYGF PYRENHRSPG YYDGRYWTMW KLPMFGCTDS GQVIKELQEA KAAPKAFV

Supporting Peptides:

| Peptide          | Uniq | -10lgP | Mass      | Length | ppm | m/z      | z | RT    | Fraction | Scan     | Source File       | Area Roasted in gel | #Feature | #Feature Roasted in gel | Start | End | PTM | AScore | Found By |
|------------------|------|--------|-----------|--------|-----|----------|---|-------|----------|----------|-------------------|---------------------|----------|-------------------------|-------|-----|-----|--------|----------|
| R.KEVDYLLR.K     | Y    | 33.37  | 1034.5760 | 8      | 0.2 | 518.2954 | 2 | 31.00 | 39       | F39:1454 | OB5952 H3A Ro.raw | 2.6266E4            | 1        | 1                       | 78    | 85  |     |        | PEAKS DB |
| total 1 peptides |      |        |           |        |     |          |   |       |          |          |                   |                     |          |                         |       |     |     |        |          |

A0A075M9B7|A0A075M9B7\_ARAHYback to list

| [Protein Coverage](#) | [Supporting Peptides](#) |

Protein Coverage:

1 PAFTAVNRRAS PAQANMVAPF SGLKSLGGFP VTRKTNDDITS VTNNGGRVQC MQVWPPLGKK KFETLSYLPD LNEEQLRKEV

81 DYLLRKGWVP CLEFEVEYGF PYRENHRSPG YYDGRYWTMW KLPMFGCTDS GQVIKELQEA KAAPKAFVR IIGFDNVRQ

Supporting Peptides:

| Peptide          | Uniq | -10lgP | Mass      | Length | ppm | m/z      | z | RT    | Fraction | Scan     | Source File       | Area Roasted in gel | #Feature | #Feature Roasted in gel | Start | End | PTM | AScore | Found By |
|------------------|------|--------|-----------|--------|-----|----------|---|-------|----------|----------|-------------------|---------------------|----------|-------------------------|-------|-----|-----|--------|----------|
| R.KEVDYLLR.K     | Y    | 33.37  | 1034.5760 | 8      | 0.2 | 518.2954 | 2 | 31.00 | 39       | F39:1454 | OB5952 H3A Ro.raw | 2.6266E4            | 1        | 1                       | 78    | 85  |     |        | PEAKS DB |
| total 1 peptides |      |        |           |        |     |          |   |       |          |          |                   |                     |          |                         |       |     |     |        |          |

A0A075M3Q0|A0A075M3Q0\_ARAHYback to list

| [Protein Coverage](#) | [Supporting Peptides](#) |

Protein Coverage:

1 PAFTTVNRRAS PAQANMVAPF SGLKSLGGFP VTRKTNDDITS VANNGGRVQC MQVWPPLGKK KFETLSYLPD LNEEQLRKEV

81 DYLLRKGWVP CLEFEVEYGF PYRENHRSPG YYDGRYWTMW KLPMFGCTDS GQVIKELQEA KAAPKAFVR IIGFDNVRQ

Supporting Peptides:

| Peptide          | Uniq | -10lgP | Mass | Length | ppm | m/z | z | RT | Fraction | Scan | Source File | Area Roasted in gel | #Feature | #Feature Roasted in gel | Start | End | PTM | AScore | Found By |
|------------------|------|--------|------|--------|-----|-----|---|----|----------|------|-------------|---------------------|----------|-------------------------|-------|-----|-----|--------|----------|
| total 1 peptides |      |        |      |        |     |     |   |    |          |      |             |                     |          |                         |       |     |     |        |          |

| Peptide          | Uniq | -10lgP | Mass      | Length | ppm | m/z      | z | RT    | Fraction | Scan     | Source File       | Area Roasted in gel | #Feature | #Feature Roasted in gel | Start | End | PTM | AScore | Found By |
|------------------|------|--------|-----------|--------|-----|----------|---|-------|----------|----------|-------------------|---------------------|----------|-------------------------|-------|-----|-----|--------|----------|
| R.KEVDYLLR.K     | Y    | 33.37  | 1034.5760 | 8      | 0.2 | 518.2954 | 2 | 31.00 | 39       | F39:1454 | OB5952 H3A Ro.raw | 2.6266E4            | 1        | 1                       | 78    | 85  |     |        | PEAKS DB |
| total 1 peptides |      |        |           |        |     |          |   |       |          |          |                   |                     |          |                         |       |     |     |        |          |

A0A075M506|A0A075M506\_ARAHY

back to list

| [Protein Coverage](#) | [Supporting Peptides](#) |

Protein Coverage:

1 PAVTTVSRAS PAQANMVAPF TGLKSLAGFP VTRKANNDIT SVANNNGRRVQ CMQVWPPVGK KKFETLSYLP DLTDEQLRKE

81 VDYLLRKGWV PCLEFELEHG FVYRENHRSP GYYDGRYWTM WKLPMFGCTD SGQVIKELQE AKAAYPSAFI RIIGFDNVRQ

Supporting Peptides:

| Peptide          | Uniq | -10lgP | Mass      | Length | ppm | m/z      | z | RT    | Fraction | Scan     | Source File       | Area Roasted in gel | #Feature | #Feature Roasted in gel | Start | End | PTM | AScore | Found By |
|------------------|------|--------|-----------|--------|-----|----------|---|-------|----------|----------|-------------------|---------------------|----------|-------------------------|-------|-----|-----|--------|----------|
| R.KEVDYLLR.K     | Y    | 33.37  | 1034.5760 | 8      | 0.2 | 518.2954 | 2 | 31.00 | 39       | F39:1454 | OB5952 H3A Ro.raw | 2.6266E4            | 1        | 1                       | 79    | 86  |     |        | PEAKS DB |
| total 1 peptides |      |        |           |        |     |          |   |       |          |          |                   |                     |          |                         |       |     |     |        |          |

T2BAU5|T2BAU5\_ARAHY

back to list

| [Protein Coverage](#) | [Supporting Peptides](#) |

Protein Coverage:

1 MAISMISSPA VTTVSRASPA QANMVAPFTG LKSLAGFPVT RKANNDITSV ANNGRRVQCM QVWPPVGKKK FETLSYLPDL

81 TDEQLRKEVD YLLRKGWVPC LEFEVGYGFP YRENHRSPGY YDGRYWMTWK LPMFGCTDSG QVIKELQEAK AAYPKAFVRI

161 IGFDNVRQVQ CISFIAYKPG GY

Supporting Peptides:

| Peptide          | Uniq | -10lgP | Mass      | Length | ppm | m/z      | z | RT    | Fraction | Scan     | Source File       | Area Roasted in gel | #Feature | #Feature Roasted in gel | Start | End | PTM | AScore | Found By |
|------------------|------|--------|-----------|--------|-----|----------|---|-------|----------|----------|-------------------|---------------------|----------|-------------------------|-------|-----|-----|--------|----------|
| R.KEVDYLLR.K     | Y    | 33.37  | 1034.5760 | 8      | 0.2 | 518.2954 | 2 | 31.00 | 39       | F39:1454 | OB5952 H3A Ro.raw | 2.6266E4            | 1        | 1                       | 87    | 94  |     |        | PEAKS DB |
| total 1 peptides |      |        |           |        |     |          |   |       |          |          |                   |                     |          |                         |       |     |     |        |          |

V5T718|V5T718\_ARAHY

back to list

| [Protein Coverage](#) | [Supporting Peptides](#) |

Protein Coverage:

1 MVSKNPNPPE GFYLDPTGAA LPLGAPFASV TAAATATAVS APNSAEDAAK KIRKPYTITK SRENWTEPEH DKFLEALQLF

81 DRDWKKIGAF VGSKTVIQR SHAQKYFIKV QKSGTSEHLP PFRPKRKAH PYPQKASKNA PLLSQLSESF QSSSALLES

161 YVLKHDPTSM LKTPIMNTVV PSWSNSTLQT TNLHVPKVN DPGSSSESTP RVQPGDESNG QGNSSFPLRV LPDFTQVYSF

241 IGSVFDPNNT DHLHLKLNMD RIDVETVLLL MRNLSVNLTS PDFEDHRKVL STYEVELDTD DYINADILQD DQLKSAAT

Supporting Peptides:

| Peptide              | Uniq | -10lgP | Mass      | Length | ppm | m/z      | z | RT    | Fraction | Scan     | Source File      | Area Roasted in gel | #Feature | #Feature Roasted in gel | Start | End | PTM | AScore | Found By |
|----------------------|------|--------|-----------|--------|-----|----------|---|-------|----------|----------|------------------|---------------------|----------|-------------------------|-------|-----|-----|--------|----------|
| K.NMDRIDVETVLLL.MR.N | Y    | 32.27  | 1816.9539 | 15     | 3.3 | 909.4872 | 2 | 64.32 | 41       | F41:3492 | OB5954 H1 Ro.raw | 1.384E4             | 1        | 1                       | 258   | 272 |     |        | PEAKS DB |
| total 1 peptides     |      |        |           |        |     |          |   |       |          |          |                  |                     |          |                         |       |     |     |        |          |

V5T7W3|V5T7W3\_ARAHY

back to list

| [Protein Coverage](#) | [Supporting Peptides](#) |

Protein Coverage:

1 MDRVKGFWSP EEDETLRRLV GAHGPRNWTI ISKSIPGRSG KSCRLRWCNQ LSPEVEHRAF TPEEDDIIVR AHAEFGNKWA  
81 TIARLLNGRT DNAVKNHWNS TLKRKCRSSA SDAVTAVYP DAQPLKRSAS VGPCHVTTPS SPSGSELSDP GLPSLSAPGS  
161 DPR**TLLSLSL PGSS**GSGAGS DSIKDGLGSG LSPDPDPAQM FSPEFLAMMQ EMVRKEVRNY MSMVEENGVR MQQTEAIRNG  
241 VMKRMGIRNG IER

Supporting Peptides:

| Peptide          | Uniq | -10lgP | Mass      | Length | ppm  | m/z      | z | RT    | Fraction | Scan     | Source File      | Area Roasted in gel | #Feature | #Feature Roasted in gel | Start | End | PTM | AScore | Found By |
|------------------|------|--------|-----------|--------|------|----------|---|-------|----------|----------|------------------|---------------------|----------|-------------------------|-------|-----|-----|--------|----------|
| R.TLLSLSPGSS.G   | Y    | 30.31  | 1073.5968 | 11     | -0.3 | 537.8055 | 2 | 29.85 | 34       | F34:1402 | OB5945 H2 Ro.raw | 1.5963E4            | 1        | 1                       | 164   | 174 |     |        | PEAKS DB |
| total 1 peptides |      |        |           |        |      |          |   |       |          |          |                  |                     |          |                         |       |     |     |        |          |

Peptide List
