# Supplementary material for: Proteomic Profiling of Major Peanut Allergens and Their Post-Translational Modifications Affected by Roasting
Source: MDPI journal article supplement (doi:10.3390/foods11243993), 2022-12-09
Supplement: s1 [file s1]

1. Notes

Ara h 1 GEL BAND RAW

2. Result Statistics

**Figure 1.** False discovery rate (FDR) curve. X axis is the number of peptides being kept. Y axis is the corresponding FDR. [?](#)

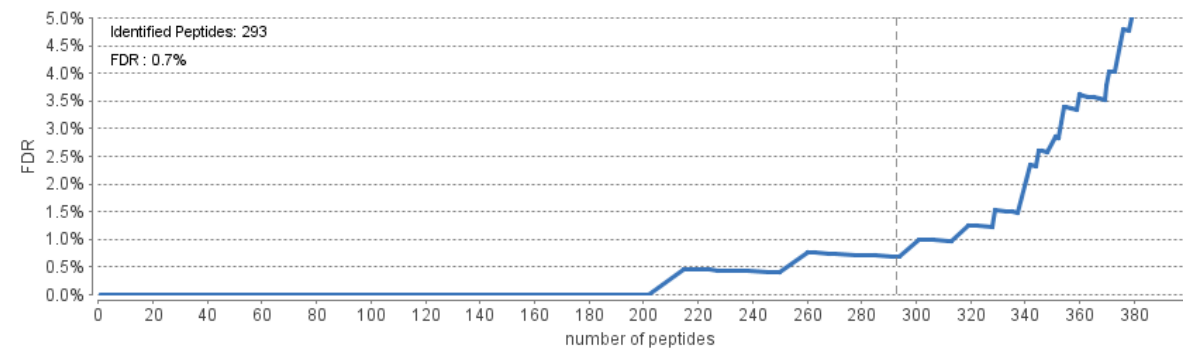

**Figure 2.** PSM score distribution. **(a)** Distribution of PEAKS peptide score; **(b)** Scatterplot of PEAKS peptide score versus precursor mass error. [?](#)

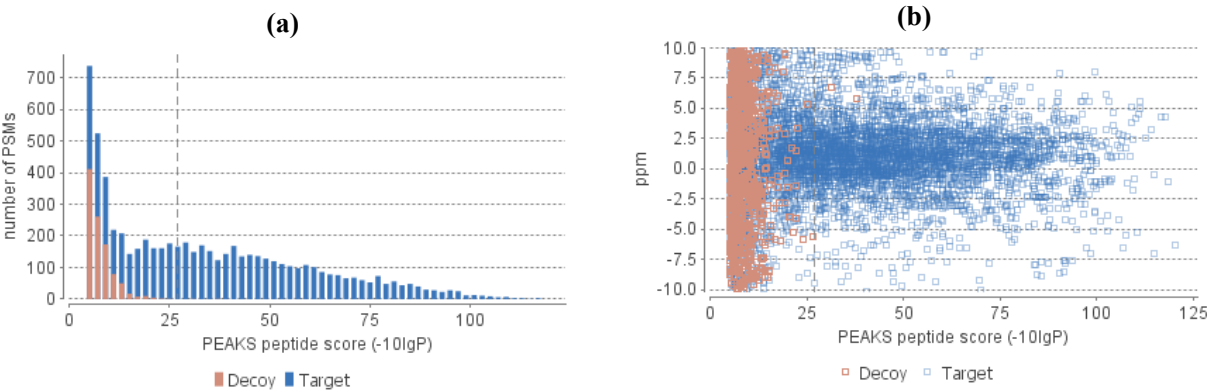

**Table 1.** Statistics of data.

|            | #Scans |       |          | #Features | Identified |        |             | #Peptides | #Sequences | #Proteins* |     |     |
|------------|--------|-------|----------|-----------|------------|--------|-------------|-----------|------------|------------|-----|-----|
|            | MS1    | MS/MS | #Chimera |           | #PSMs      | #Scans | #Features** |           |            | Groups     | All | Top |
| Total      | 4978   | 7621  | 1342     | 11980     | 3438       | 3305   | 877         | 293       | 123        | 3          | 5   | 4   |
| raw peanut | 4978   | 7621  | 1342     | 11980     | 3438       | 3305   | 877         | 293       | 123        | 3          | 5   | 4   |

\* proteins with significant peptides are used in counts.  
\*\* features are identified by DB search only.

**Figure 3.** Sample overlap for Proteins and Peptides (up to 8 samples). **(a)** All Proteins; **(b)** Top Proteins; **(c)** Peptides; ?

**(a)** Not applicable to only one sample **(b)** Not applicable to only one sample **(c)** Not applicable to only one sample

**Figure 4.** Distribution of peptide feature detection. **(a)** Feature m/z distribution; **(b)** Feature RT distribution.

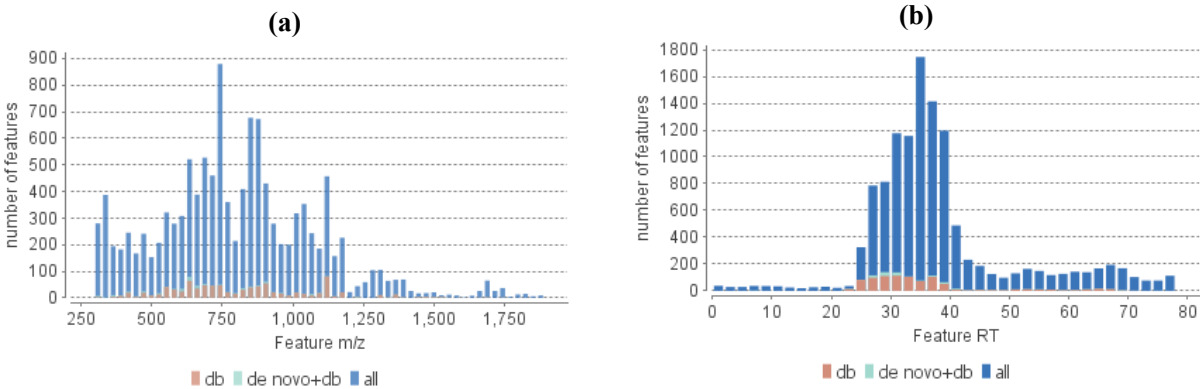

**Figure 5.** Distribution of identified peptide features. **(a)** Feature abundance distribution; **(b)** *De novo* sequencing validation. ?

**(a)** **(b)**



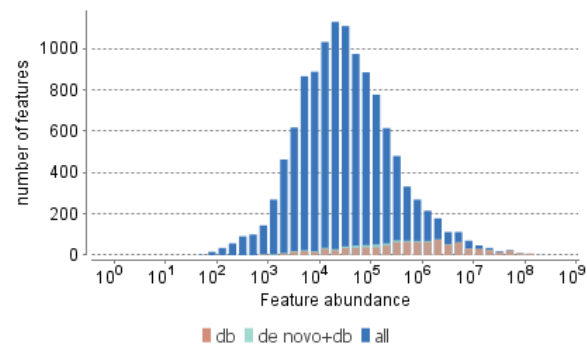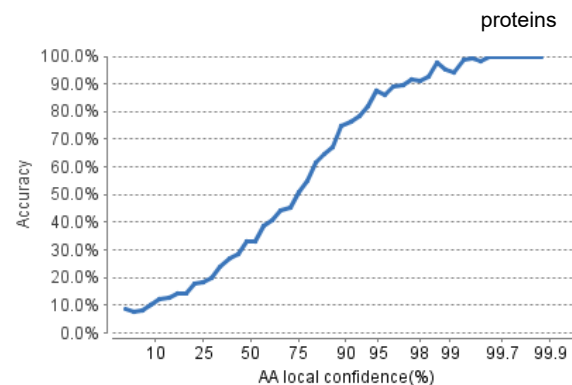**Table 2.** Result filtration parameters.

|                          |       |
|--------------------------|-------|
| Peptide -10lgP           | ≥26.8 |
| PTM AScore               | ≥50   |
| Protein -10lgP           | ≥20   |
| Proteins unique peptides | ≥2    |
| De novo score(%)         | ≥50%  |

**Table 4.** PTM profile.

| Name                | ΔMass  | Position   | #PSM | -10lgP | Abundance | AScore  |
|---------------------|--------|------------|------|--------|-----------|---------|
| Deamidation         | .98    | NQ         | 250  | 111.24 | 6.8E7     | 25.66   |
| Carbamidomethyl     | 57.02  | C          | 190  | 120.22 | 7.23E6    | 1000.00 |
| Oxidation           | 15.99  | M          | 184  | 110.46 |           | 30.46   |
| HydPro              | 15.99  | P          | 47   | 65.62  | 2.67E6    | 1000.00 |
| Dethiomethyl        | -48.00 | M          | 36   | 96.95  | 4.28E6    | 1000.00 |
| Carbamylation       | 43.01  | K,N-term   | 33   | 80.77  | 1.79E6    | 252.86  |
| Amidine             | 41.03  | N-term     | 31   | 59.92  | 2.02E6    | 1000.00 |
| Methylation(KR)     | 14.02  | KR         | 29   | 64.78  | 2.03E6    | 69.38   |
| Methylation(others) | 14.02  | CDHST      | 25   | 88.98  |           | 33.98   |
| Dehydration         | -18.01 | DST,C-term | 24   | 52.23  | 6.18E6    | 1000.00 |
| Ammonia loss        | -17.03 | N          | 14   | 99.83  | 6.34E5    | 11.10   |
| Pyro-glu from Q     | -17.03 | N-term     | 8    | 65.38  | 9.23E5    | 1000.00 |
| Oxidation           | 15.99  | HW         | 7    | 56.30  |           | 1000.00 |
| Acetylation         | 42.01  | K          | 5    | 41.87  | 1.17E6    | 13.38   |
| Methyl+Deamidated   | 15.00  | Q          | 4    | 43.55  | 5.72E6    | 121.92  |

**Table 3.** Statistics of filtered result.

|                                |      |
|--------------------------------|------|
| FDR (Peptide-Spectrum Matches) | 0.1% |
| FDR (Peptide Sequences)        | 0.7% |
| FDR (Protein Group)            | 0.0% |
| De Novo Only Spectra           | 368  |

### 3. Experiment Control

**Figure 6.** Precursor mass error of peptide-spectrum matches (PSM) in filtered result. **(a)** Distribution of precursor mass error in ppm; **(b)** Scatterplot of precursor m/z versus precursor mass error in ppm. ?

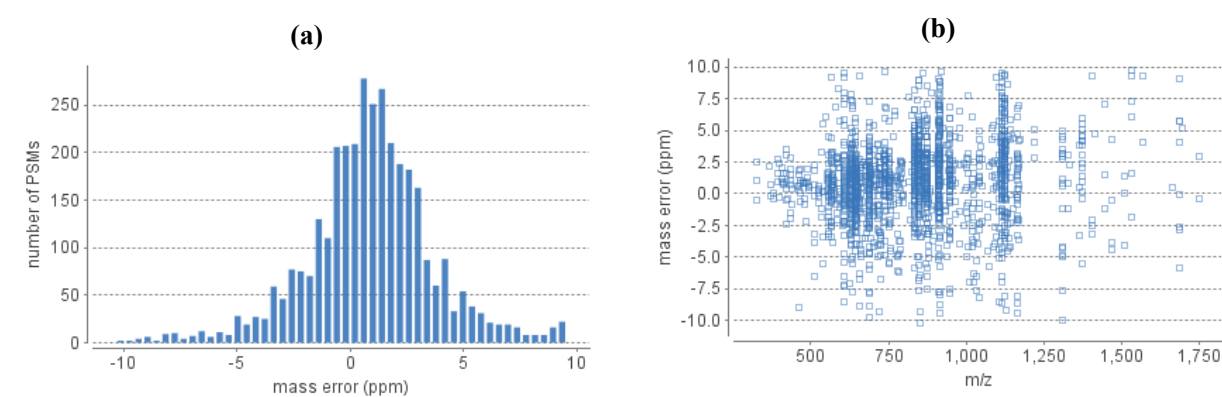

**Table 5.** Number of identified peptides in each sample by the number of missed cleavages.

|                  |    |     |    |   |    |
|------------------|----|-----|----|---|----|
| Missed Cleavages | 0  | 1   | 2  | 3 | 4+ |
| raw peanut       | 93 | 152 | 48 | 0 | 0  |

## 4. Other Information

**Table 6.** Search parameters.

Search Engine Name: PEAKS  
Parent Mass Error Tolerance: 10.0 ppm  
Fragment Mass Error Tolerance: 0.5 Da  
Precursor Mass Search Type: monoisotopic  
Enzyme: Trypsin  
Max Missed Cleavages: 2  
Digest Mode: Unspecific  
Fixed Modifications:  
Carbamidomethylation: 57.02  
Variable Modifications:  
Deamidation (NQ): 0.98  
Oxidation (M): 15.99  
Hydroxylation Pro: 15.99  
Acetylation (K): 42.01  
Acetylation (Protein N-term): 42.01  
Acetylation (N-term): 42.01

**Table 7.** Instrument parameters.

Fractions: OB5939 H1 raw.raw, OB5940 H1 raw.raw, OB5941 H1 raw.raw  
Ion Source: ESI(nano-spray)  
Fragmentation Mode: CID, CAD(y and b ions)  
MS Scan Mode: FT-ICR/Orbitrap  
MS/MS Scan Mode: Linear Ion Trap

Amidation: -0.98  
Beta-methylthiolation: 45.99  
and 305 more...  
Max Variable PTM Per Peptide: 5  
Database: Uniprot\_Peanut-3818\_Jul18  
Taxon: All  
Contaminant Database: contaminantsMQ\_mar19  
Searched Entry: 1723  
FDR Estimation: Enabled  
De novo score(%) threshold: 15  
Peptide hit threshold (-10logP): 30.0  
Peaks run ID: 12  
Merge Options: no merge  
Precursor Options: corrected  
Charge Options: no correction  
Filter Charge: 2 - 15  
Process: true  
Associate chimera: yes

## Protein List

Protein Accession Contains:

Protein Description Contains:

Protein Sample Area &gt;=

Protein PTM Contains:

| Protein Group | Protein ID | Accession                                      | -10lgP | Coverage (%) | Coverage (%) raw peanut | Area raw peanut | #Peptides | #Unique | #Spec raw peanut | PTM | Avg. Mass | Description                                                         |
|---------------|------------|------------------------------------------------|--------|--------------|-------------------------|-----------------|-----------|---------|------------------|-----|-----------|---------------------------------------------------------------------|
| 1             | 3          | <a href="#">P43237 ALL11_ARAHY</a>             | 509.70 | 67           | 67                      | 3.3474E8        | 97        | 11      | 3098             | Y   | 70283     | Allergen Ara h 1, clone P17 OS=Arachis hypogaea OX=3818 PE=1 SV=1   |
| 1             | 2          | <a href="#">tr B3IXL2 B3IXL2_ARAHY</a>         | 509.70 | 67           | 67                      | 3.3474E8        | 97        | 11      | 3098             | Y   | 70283     | Main allergen Ara h1 OS=Arachis hypogaea OX=3818 PE=2 SV=1          |
| 5             | 7          | <a href="#">tr E5G076 E5G076_ARAHY</a>         | 456.46 | 57           | 57                      | 1.3782E7        | 63        | 2       | 1104             | Y   | 70788     | Ara h 1 allergen OS=Arachis hypogaea OX=3818 GN=ara h 1 PE=2 SV=1   |
| 7             | 12         | <a href="#">tr A0A290FZZ3 A0A290FZZ3_ARAHY</a> | 118.71 | 11           | 11                      | 1.9568E5        | 2         | 2       | 2                | N   | 41532     | Resistance protein (Fragment) OS=Arachis hypogaea OX=3818 PE=2 SV=1 |

**total 4 proteins**

P43237|ALL11\_ARAHY

[back to list](#)

| [Protein Coverage](#) | [Supporting Peptides](#) |

### Protein Coverage:

1 MRGRVSPLML LLGILVLASV SATQAKSPYR KTENPCAQR LQSCQQEPDD LKQKACESRC TKLEYDPRCV YDTGATNQRH  
81 PPGERTRGRO PGDYDDRRRO PRREEGGRWG PAEPRERERE EDWROPREDW RRPSHOOPRK IRPEGREGEQ EWGTPGSEVR

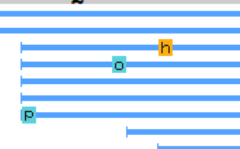

- Acetylation (K) (+42.01)
- Amidination of lysines or N-terminal amines with methyl acetimidate (+41.03)
- Ammonia-loss (N) (-17.03)
- Carbamidomethylation (+57.02)
- Carbamylation (+43.01)
- Carboxymethyl (+58.01)
- Deamidation (NQ) (+0.98)
- Dehydration (-18.01)
- Dimethylation(KR) (+28.03)
- Deamidation followed by a methylation (+15.00)
- Dehiomethyl (-48.00)
- Formylation (+77.00)

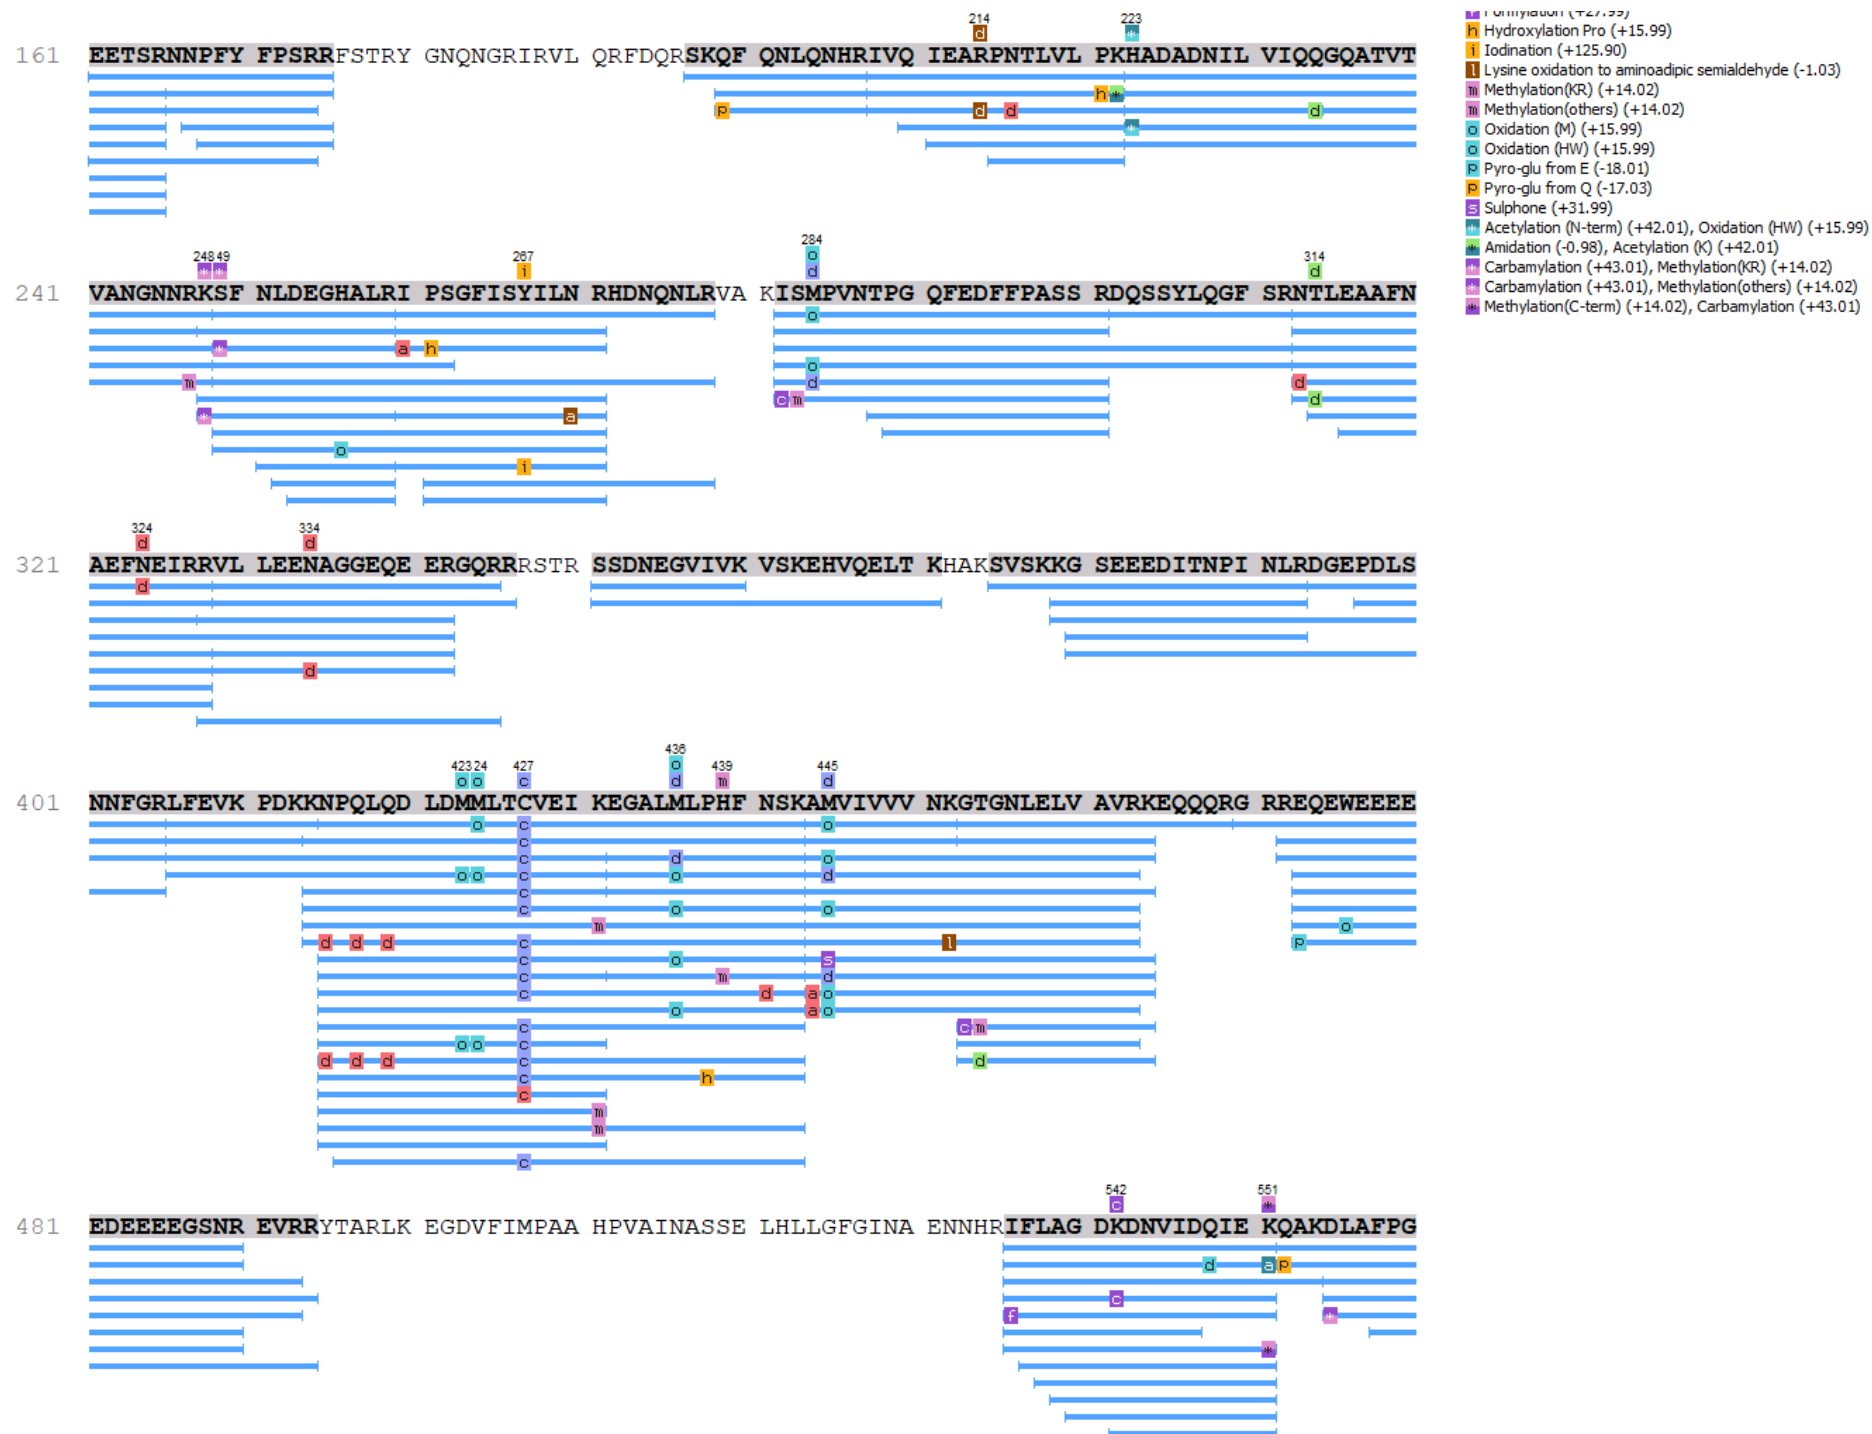

561 SGEQVEKLIK NQR ESHFVSA RPQSQSPSSP EKEDQEEENQ GGKGPLLSIL KAFN

## Supporting Peptides:

| Peptide                                | Uniq | -10lgP | Mass      | Length | ppm  | m/z       | z | RT    | Fraction | Scan    | Source File       | Area raw peanut | #Feature | #Feature raw peanut | Start | End | PTM                  | AScore                                                  | Found By  |
|----------------------------------------|------|--------|-----------|--------|------|-----------|---|-------|----------|---------|-------------------|-----------------|----------|---------------------|-------|-----|----------------------|---------------------------------------------------------|-----------|
| K.NPQLQDLDMMLTC(+57.02)VEIK.E          | N    | 120.22 | 2046.9788 | 17     | -6.3 | 1024.4902 | 2 | 37.10 | 1        | F1:1864 | OB5939 H1 raw.raw | 1.3638E7        | 5        | 5                   | 415   | 431 | Carbamidomethylation | C13:Carbamidomethylation:1000.00                        | PEAKS DB  |
| K.KNPQLQDLDMMLTC(+57.02)VEIK.E         | N    | 118.64 | 2175.0737 | 18     | -1.1 | 1088.5430 | 2 | 34.52 | 2        | F2:1751 | OB5940 H1 raw.raw | 4.131E6         | 3        | 3                   | 414   | 431 | Carbamidomethylation | C14:Carbamidomethylation:1000.00                        | PEAKS DB  |
| R.EQEWEEDDEEEEGSNR.E                   | N    | 117.85 | 2280.8413 | 18     | 4.3  | 1141.4329 | 2 | 28.23 | 1        | F1:1323 | OB5939 H1 raw.raw | 4.2916E6        | 3        | 3                   | 473   | 490 |                      |                                                         | PEAKS DB  |
| R.NTLEAAFNAEFNEIR.R                    | N    | 114.83 | 1737.8322 | 15     | -0.4 | 869.9230  | 2 | 34.89 | 2        | F2:1770 | OB5940 H1 raw.raw | 1.3513E7        | 6        | 6                   | 313   | 327 |                      |                                                         | PEAKS DB  |
| K.HADADNILVIQQGQATVTVANGNNRK.S         | N    | 114.12 | 2746.4111 | 26     | 3.2  | 916.4806  | 3 | 29.15 | 1        | F1:1378 | OB5939 H1 raw.raw | 4.7574E7        | 8        | 8                   | 223   | 248 |                      |                                                         | PEAKS DB  |
| K.HADADNILVIQQGQATVTVAN(+.98)GNNRK.S   | N    | 111.24 | 2747.3950 | 26     | 5.5  | 916.8107  | 3 | 29.51 | 1        | F1:1400 | OB5939 H1 raw.raw | 3.8297E8        | 20       | 20                  | 223   | 248 |                      | N21:Deamidation (N Q):26.31                             | PEAKS DB  |
| K.HADADNILVIQQGQATVTVANGNNR.K          | N    | 111.11 | 2618.3162 | 25     | 5.0  | 1310.1719 | 2 | 30.00 | 2        | F2:1473 | OB5940 H1 raw.raw | 6.2545E6        | 3        | 3                   | 223   | 247 |                      |                                                         | PEAKS DB  |
| K.NPQLQDLDM(+15.99)MLTC(+57.02)VEIK.E  | N    | 110.46 | 2062.9736 | 17     | -5.3 | 1032.4886 | 2 | 36.07 | 2        | F2:1840 | OB5940 H1 raw.raw | 3.4606E5        | 2        | 2                   | 415   | 431 | Carbamidomethylation | M9:Oxidation (M):30.46;C13:Carbamidomethylation:1000.00 | PEAKS DB  |
| K.ISM(+15.99)PVNTPGQFEDFFPASSR.D       | N    | 109.22 | 2242.0364 | 20     | -1.8 | 1122.0234 | 2 | 33.79 | 2        | F2:1706 | OB5940 H1 raw.raw | 1.7538E7        | 15       | 15                  | 282   | 301 | Oxidation (M)        | M3:Oxidation (M):1000.00                                | PEAKS DB  |
| K.ISMPVNTPGQFEDFFPASSR.D               | N    | 107.66 | 2226.0415 | 20     | 1.7  | 1114.0299 | 2 | 35.27 | 2        | F2:1792 | OB5940 H1 raw.raw | 2.1717E8        | 29       | 29                  | 282   | 301 |                      |                                                         | PEAKS DB  |
| R.IFLAGDKDNVIDQIEK.Q                   | N    | 103.70 | 1816.9570 | 16     | -1.1 | 909.4848  | 2 | 32.03 | 1        | F1:1588 | OB5939 H1 raw.raw | 7.5151E8        | 30       | 30                  | 536   | 551 |                      |                                                         | PEAKS DB  |
| K.HADADNILVIQQGQATVTVAN(-17.03)GNNRK.S | N    | 99.83  | 2729.3845 | 26     | 0.5  | 1365.7002 | 2 | 28.96 | 2        | F2:1400 | OB5940 H1 raw.raw | 9.5179E6        | 6        | 6                   | 223   | 248 |                      | N21:Ammonia-loss (N):18.53                              | PEAKS PTM |
| R.IFLAGDKDNVIDQIEKQAK.D                | N    | 99.61  | 2144.1477 | 19     | 1.7  | 715.7244  | 3 | 32.37 | 1        | F1:1571 | OB5939 H1 raw.raw | 5.6465E7        | 7        | 7                   | 536   | 554 |                      |                                                         | PEAKS DB  |

total 247 peptides

| Peptide                                   | Uniq | -10lgP | Mass      | Length | ppm  | m/z       | z | RT    | Fraction | Scan    | Source File       | Area raw peanut | #Feature | #Feature raw peanut | Start | End | PTM                  | AScore                                           | Found By  |
|-------------------------------------------|------|--------|-----------|--------|------|-----------|---|-------|----------|---------|-------------------|-----------------|----------|---------------------|-------|-----|----------------------|--------------------------------------------------|-----------|
| K.AMVVVVVKGTGNLELVAVR.K                   | N    | 99.39  | 2081.2031 | 20     | -3.5 | 694.7392  | 3 | 33.79 | 2        | F2:1711 | OB5940 H1 raw.raw | 6.8972E7        | 9        | 9                   | 444   | 463 |                      |                                                  | PEAKS DB  |
| K.GSEEDITNPINLRDGEPLDLSNNFGR.L            | N    | 98.56  | 2887.3220 | 26     | 2.3  | 963.4502  | 3 | 32.73 | 1        | F1:1590 | OB5939 H1 raw.raw | 4.549E7         | 8        | 8                   | 380   | 405 |                      |                                                  | PEAKS DB  |
| K.SFNLDEGHALRIPSGFISYILNR.H               | N    | 98.27  | 2618.3604 | 23     | -1.1 | 873.7931  | 3 | 37.47 | 2        | F2:1880 | OB5940 H1 raw.raw | 1.7034E8        | 24       | 23                  | 249   | 271 |                      |                                                  | PEAKS DB  |
| R.KSFNLDEGHALRIPSGFISYILNR.H              | N    | 97.91  | 2746.4553 | 24     | -2.1 | 916.4905  | 3 | 36.16 | 1        | F1:1802 | OB5939 H1 raw.raw | 8.5492E6        | 5        | 5                   | 248   | 271 |                      |                                                  | PEAKS DB  |
| R.VLLEENAGGEQEER.G                        | N    | 97.22  | 1571.7427 | 14     | 2.5  | 786.8806  | 2 | 26.75 | 1        | F1:1224 | OB5939 H1 raw.raw | 1.2414E7        | 3        | 3                   | 329   | 342 |                      |                                                  | PEAKS DB  |
| R.DQSSYLQGFGR.N                           | N    | 97.09  | 1286.5891 | 11     | -3.0 | 644.2999  | 2 | 30.18 | 2        | F2:1484 | OB5940 H1 raw.raw | 6.1544E7        | 13       | 13                  | 302   | 312 |                      |                                                  | PEAKS DB  |
| K.AM(-48.00)VIVVVVVKGTGNLELVAVR.K         | N    | 96.95  | 2033.1997 | 20     | 1.4  | 678.7415  | 3 | 30.71 | 2        | F2:1519 | OB5940 H1 raw.raw | 1.7497E7        | 6        | 6                   | 444   | 463 | Dethiomethyl         | M2:Det<br>hiomet<br>hyl:100<br>0.00              | PEAKS PTM |
| K.SFNLDEGHALR.I                           | N    | 96.68  | 1257.6101 | 11     | 1.8  | 629.8135  | 2 | 27.87 | 1        | F1:1301 | OB5939 H1 raw.raw | 7.3788E7        | 15       | 15                  | 249   | 259 |                      |                                                  | PEAKS DB  |
| K.AMVVVVVKGTGNLELVAVRK.E                  | N    | 96.39  | 2209.2981 | 21     | -2.2 | 737.4384  | 3 | 31.97 | 2        | F2:1628 | OB5940 H1 raw.raw | 2.8068E8        | 12       | 12                  | 444   | 464 |                      |                                                  | PEAKS DB  |
| K.AM(+15.99)VIVVVVVKGTGNLELVAVR.K         | N    | 95.84  | 2097.1980 | 20     | -2.2 | 1049.6040 | 2 | 32.73 | 3        | F3:1638 | OB5941 H1 raw.raw | 3.1624E7        | 6        | 6                   | 444   | 463 | Oxidation (M)        | M2:Oxi<br>dation<br>(M):10<br>00.00              | PEAKS DB  |
| R.IPSGFISYILNR.H                          | N    | 93.86  | 1378.7609 | 12     | 1.2  | 690.3885  | 2 | 36.74 | 2        | F2:1881 | OB5940 H1 raw.raw | 1.7713E8        | 5        | 5                   | 260   | 271 |                      |                                                  | PEAKS DB  |
| R.RVLEENAGGEQEER.G                        | N    | 93.51  | 1727.8438 | 15     | 0.4  | 576.9554  | 3 | 24.77 | 2        | F2:1156 | OB5940 H1 raw.raw | 1.346E5         | 5        | 5                   | 328   | 342 |                      |                                                  | PEAKS DB  |
| K.NPQLQDLDMMLTC(+57.02)VEIKEGALMLPHFNSK.A | N    | 92.80  | 3371.6387 | 29     | -2.9 | 1686.8218 | 2 | 37.92 | 1        | F1:1910 | OB5939 H1 raw.raw | 1.8404E8        | 11       | 11                  | 415   | 443 | Carbamidomethylation | C13:Ca<br>rbamid<br>omethy<br>lation:1<br>000.00 | PEAKS DB  |
| R.KSFNLDEGHALR.I                          | N    | 89.31  | 1385.7051 | 12     | 1.9  | 693.8611  | 2 | 25.26 | 2        | F2:1181 | OB5940 H1 raw.raw | 3.3181E6        | 6        | 6                   | 248   | 259 |                      |                                                  | PEAKS DB  |
| K.KGSEEDITNPINLRDGEPLDLSNNFGR.L           | N    | 89.20  | 3015.4170 | 27     | -0.8 | 1006.1455 | 3 | 31.46 | 1        | F1:1545 | OB5939 H1 raw.raw | 7.9044E7        | 10       | 10                  | 379   | 405 |                      |                                                  | PEAKS DB  |
| K.NPQLQDLDMMLTC(+14.02)VEIK.E             | N    | 88.98  | 2003.9730 | 17     | -4.9 | 1002.9888 | 2 | 37.72 | 2        | F2:1938 | OB5940 H1 raw.raw | 6.7012E5        | 2        | 2                   | 415   | 431 |                      | C13:Me<br>thylatio<br>n(other<br>s):33.9<br>8    | PEAKS PTM |
| R.NTLEAAFAEFNEIRR.V                       | N    | 86.44  | 1893.9332 | 16     | -3.6 | 947.9705  | 2 | 35.28 | 1        | F1:1741 | OB5939 H1 raw.raw | 3.2153E8        | 22       | 22                  | 313   | 328 |                      |                                                  | PEAKS DB  |
| K.HADADNILVIQQGQATVTVANGN(-17.03)NRK.S    | N    | 85.41  | 2729.3845 | 26     | -3.3 | 1365.6951 | 2 | 29.38 | 3        | F3:1432 | OB5941 H1 raw.raw | 2.4846E6        | 2        | 2                   | 223   | 248 |                      | N23:A<br>mmoni<br>a-loss<br>(N):0.0<br>0         | PEAKS PTM |

total 247 peptides

| Peptide                                           | Uniq | -10lgP | Mass      | Length | ppm  | m/z       | z | RT    | Fraction | Scan    | Source File       | Area raw peanut | #Feature | #Feature raw peanut | Start | End | PTM                  | AScore                                                      | Found By  |
|---------------------------------------------------|------|--------|-----------|--------|------|-----------|---|-------|----------|---------|-------------------|-----------------|----------|---------------------|-------|-----|----------------------|-------------------------------------------------------------|-----------|
| K.DLAFPGSGEQVEK.L                                 | N    | 85.12  | 1375.6619 | 13     | 1.9  | 688.8395  | 2 | 29.66 | 2        | F2:1451 | OB5940 H1 raw.raw | 6.5078E7        | 3        | 3                   | 555   | 567 |                      |                                                             | PEAKS DB  |
| K.NPQLQDLDM(-48.00)LTC(+57.02)VEIK.E              | N    | 85.01  | 1998.9755 | 17     | 0.5  | 1000.4955 | 2 | 32.73 | 1        | F1:1599 | OB5939 H1 raw.raw | 1.7365E7        | 6        | 6                   | 415   | 431 | Carbamidomethylation | M10:De thiomethyl:27.96;C13:Carb amido methyl ation:1000.00 | PEAKS PTM |
| R.VLLEENAGGEQEERGQR.R                             | N    | 84.92  | 1912.9238 | 17     | 1.8  | 957.4709  | 2 | 25.31 | 3        | F3:1182 | OB5941 H1 raw.raw | 1.9929E6        | 6        | 6                   | 329   | 345 |                      |                                                             | PEAKS DB  |
| R.SSDNEGVIVKVSKEHVQLTK.H                          | N    | 84.86  | 2325.2175 | 21     | 1.3  | 776.0808  | 3 | 28.31 | 3        | F3:1362 | OB5941 H1 raw.raw | 1.2881E5        | 2        | 2                   | 351   | 371 |                      |                                                             | PEAKS DB  |
| K.KGSEEDITNPINLR.D                                | N    | 84.79  | 1713.8533 | 15     | 3.6  | 857.9370  | 2 | 28.42 | 2        | F2:1374 | OB5940 H1 raw.raw | 1.1329E7        | 7        | 7                   | 379   | 393 |                      |                                                             | PEAKS DB  |
| K.KNPQLQDLDM(+15.99)LTC(+57.02)VEIKEGALMLPHFNSK.A | N    | 84.57  | 3515.7285 | 30     | -2.7 | 879.9370  | 4 | 34.52 | 2        | F2:1755 | OB5940 H1 raw.raw | 2.6704E6        | 3        | 3                   | 414   | 443 | Carbamidomethylation | M11:Oxidation (M):30.46;C14:Carb amido methyl ation:1000.00 | PEAKS DB  |
| R.DGEPDLSNNFGR.L                                  | N    | 84.53  | 1319.5742 | 12     | 0.4  | 660.7947  | 2 | 29.14 | 1        | F1:1381 | OB5939 H1 raw.raw | 3.3217E6        | 3        | 3                   | 394   | 405 |                      |                                                             | PEAKS DB  |
| K.AM(+15.99)VIVVVKGTGNLELVAVRK.E                  | N    | 83.52  | 2225.2930 | 21     | -2.3 | 1113.6512 | 2 | 31.28 | 1        | F1:1523 | OB5939 H1 raw.raw | 4.3919E7        | 8        | 8                   | 444   | 464 | Oxidation (M)        | M2:Oxidation (M):1000.00                                    | PEAKS DB  |
| R.EGEQEWGTPGSEVRETSR.N                            | Y    | 82.53  | 2161.9512 | 19     | 4.3  | 1081.9875 | 2 | 27.69 | 1        | F1:1291 | OB5939 H1 raw.raw | 2.0963E7        | 6        | 6                   | 147   | 165 |                      |                                                             | PEAKS DB  |
| K.HADADNILVIQQGQATVTVAN(+.98)GNNR.K               | N    | 82.15  | 2619.3000 | 25     | -1.2 | 1310.6558 | 2 | 30.35 | 2        | F2:1535 | OB5940 H1 raw.raw | 5.2956E6        | 1        | 1                   | 223   | 247 |                      | N21:De amidation (N Q):7.32                                 | PEAKS DB  |
| R.EGEQEWGTPGSEVR.E                                | Y    | 81.97  | 1559.6852 | 14     | 1.4  | 780.8510  | 2 | 27.35 | 2        | F2:1310 | OB5940 H1 raw.raw | 8.022E5         | 3        | 3                   | 147   | 160 |                      |                                                             | PEAKS DB  |
| K.KNPQLQDLDM(+15.99)LTC(+57.02)VEIK.E             | N    | 81.97  | 2191.0686 | 18     | 0.5  | 1096.5421 | 2 | 32.43 | 2        | F2:1621 | OB5940 H1 raw.raw | 1.9806E5        | 1        | 1                   | 414   | 431 | Carbamidomethylation | M11:Oxidation (M):9.34;C14:Carb amido methyl ation:1000.00  | PEAKS DB  |
| K.EGALMLPHFNSK.A                                  | N    | 81.44  | 1342.6703 | 12     | 4.0  | 672.3451  | 2 | 30.40 | 1        | F1:1456 | OB5939 H1 raw.raw | 9.7706E6        | 3        | 3                   | 432   | 443 |                      |                                                             | PEAKS DB  |
| K.QAKDLAFPGSGEQVEK.L                              | N    | 81.31  | 1702.8525 | 16     | 1.8  | 852.4351  | 2 | 26.85 | 3        | F3:1278 | OB5941 H1 raw.raw | 1.3516E6        | 7        | 7                   | 552   | 567 |                      |                                                             | PEAKS DB  |
| K.GSEEDITNPINLR.D                                 | N    | 80.86  | 1585.7583 | 14     | 2.4  | 793.8883  | 2 | 30.52 | 2        | F2:1506 | OB5940 H1 raw.raw | 3.0736E6        | 3        | 3                   | 380   | 393 |                      |                                                             | PEAKS DB  |
| total 247 peptides                                |      |        |           |        |      |           |   |       |          |         |                   |                 |          |                     |       |     |                      |                                                             |           |

| Peptide                                            | Uniq | -10lgP | Mass      | Length | ppm  | m/z       | z | RT    | Fraction | Scan    | Source File       | Area raw peanut | #Feature | #Feature raw peanut | Start | End | PTM                                 | AScore                                                   | Found By  |
|----------------------------------------------------|------|--------|-----------|--------|------|-----------|---|-------|----------|---------|-------------------|-----------------|----------|---------------------|-------|-----|-------------------------------------|----------------------------------------------------------|-----------|
| K.H(+43.01)(+14.02)ADADNILVIQQGQATVTVANGNNRK.S     | N    | 80.77  | 2803.4324 | 26     | -1.3 | 935.4835  | 3 | 29.92 | 3        | F3:1452 | OB5941 H1 raw.raw | 2.1221E6        | 2        | 2                   | 223   | 248 |                                     | H1:Carbamylation:25.2.86;H1:Methylation(others):25.66    | PEAKS PTM |
| K.AMVIVVVK.G                                       | N    | 78.49  | 971.5837  | 9      | 0.9  | 486.7996  | 2 | 29.32 | 2        | F2:1448 | OB5940 H1 raw.raw | 9.4803E6        | 3        | 3                   | 444   | 452 |                                     |                                                          | PEAKS DB  |
| F.LAGDKDNVIDQIEK.Q                                 | N    | 78.09  | 1556.8046 | 14     | -6.1 | 779.4048  | 2 | 31.62 | 2        | F2:1564 | OB5940 H1 raw.raw | 4.6126E6        | 2        | 2                   | 538   | 551 |                                     |                                                          | PEAKS DB  |
| K.KNPQLQDLDM(+15.99)MLTC(+57.02)VEIK.E             | N    | 77.76  | 2191.0686 | 18     | 0.6  | 1096.5422 | 2 | 33.03 | 1        | F1:1615 | OB5939 H1 raw.raw | 0               | 0        | 0                   | 414   | 431 | Carbamidomethylation                | M10:Oxidation(M):14.02;C14:Carbamidomethylation:1000.00  | PEAKS DB  |
| R.IPSGFISYILNRHDNQNLR.V                            | N    | 77.66  | 2256.1763 | 19     | 3.4  | 1129.0992 | 2 | 33.47 | 1        | F1:1643 | OB5939 H1 raw.raw | 3.1228E8        | 24       | 24                  | 260   | 278 |                                     |                                                          | PEAKS DB  |
| R.GRREQEWEEEEEEEEGSNR.E                            | N    | 77.42  | 2650.0649 | 21     | 0.3  | 884.3625  | 3 | 25.64 | 2        | F2:1205 | OB5940 H1 raw.raw | 2.3251E6        | 7        | 7                   | 470   | 490 |                                     |                                                          | PEAKS DB  |
| K.NPQLQDLDM(+15.99)MLTC(+57.02)VEIKEGALMLPHFNSK.A  | N    | 75.51  | 3387.6335 | 29     | -1.5 | 1130.2168 | 3 | 36.17 | 3        | F3:1926 | OB5941 H1 raw.raw | 2.5418E7        | 3        | 3                   | 415   | 443 | Carbamidomethylation                | M9:Oxidation(M):10.11;C13:Carbamidomethylation:1000.00   | PEAKS DB  |
| K.EGALM(+15.99)LPHFNSK.A                           | N    | 74.93  | 1358.6653 | 12     | 2.1  | 680.3414  | 2 | 29.74 | 3        | F3:1443 | OB5941 H1 raw.raw | 2.0704E6        | 3        | 3                   | 432   | 443 | Oxidation (M)                       | M5:Oxidation(M):1000.00                                  | PEAKS DB  |
| R.LFEVKPDKKNPQLQDLDMMLTC(+57.02)VEIK.E             | N    | 74.78  | 3131.6069 | 26     | 3.7  | 1044.8801 | 3 | 33.97 | 2        | F2:1716 | OB5940 H1 raw.raw | 3.7773E6        | 3        | 3                   | 406   | 431 | Carbamidomethylation                | C22:Carbamidomethylation:1000.00                         | PEAKS DB  |
| K.KNPQLQDLDMMLTC(+57.02)VEIKEGALM(+15.99)LPHFNSK.A | N    | 74.26  | 3515.7285 | 30     | -0.8 | 879.9387  | 4 | 35.84 | 1        | F1:1790 | OB5939 H1 raw.raw | 5.1448E6        | 2        | 2                   | 414   | 443 | Carbamidomethylation; Oxidation (M) | C14:Carbamidomethylation:1000.00; M23:Oxidation(M):69.38 | PEAKS DB  |
| K.HADADNILVIQQGQATVTVANGNN(+.98)RK.S               | N    | 73.98  | 2747.3950 | 26     | 1.9  | 916.8074  | 3 | 39.56 | 2        | F2:2095 | OB5940 H1 raw.raw | 5.4145E5        | 4        | 4                   | 223   | 248 |                                     | N24:Deamidation (NQ):14.02                               | PEAKS DB  |
| K.GTGNLELVAVRK.E                                   | N    | 73.67  | 1255.7249 | 12     | 0.9  | 628.8702  | 2 | 26.85 | 3        | F3:1263 | OB5941 H1 raw.raw | 1.0553E7        | 7        | 7                   | 453   | 464 |                                     |                                                          | PEAKS DB  |

total 247 peptides



| Peptide                                              | Uniq | -10lgP | Mass      | Length | ppm  | m/z       | z | RT    | Fraction | Scan    | Source File       | Area raw peanut | #Feature | #Feature raw peanut | Start | End | PTM                                 | AScore                                                    | Found By  |
|------------------------------------------------------|------|--------|-----------|--------|------|-----------|---|-------|----------|---------|-------------------|-----------------|----------|---------------------|-------|-----|-------------------------------------|-----------------------------------------------------------|-----------|
| K.NPQLQDLDMMLTC(+15.99)LTC(+57.02)VEIKEGALMLPHFNSK.A | N    | 72.71  | 3387.6335 | 29     | 3.8  | 1130.2228 | 3 | 37.84 | 2        | F2:1902 | OB5940 H1 raw.raw | 8.789E6         | 3        | 3                   | 415   | 443 | Carbamidomethylation                | M10:Oxidation (M):14.02;C13:Carbamidomethylation:1000.00  | PEAKS DB  |
| K.GTGNLELVAVR.K                                      | N    | 71.83  | 1127.6299 | 11     | 0.2  | 564.8223  | 2 | 29.32 | 2        | F2:1429 | OB5940 H1 raw.raw | 1.0095E7        | 3        | 3                   | 453   | 463 |                                     |                                                           | PEAKS DB  |
| R.NNPFYFSPSR.R                                       | N    | 71.25  | 1140.5352 | 9      | 0.9  | 571.2754  | 2 | 30.89 | 2        | F2:1528 | OB5940 H1 raw.raw | 1.2382E7        | 4        | 4                   | 166   | 174 |                                     |                                                           | PEAKS DB  |
| R.VLLEENAGGEQEERGQRR.R                               | N    | 71.19  | 2069.0249 | 18     | 2.1  | 690.6837  | 3 | 25.31 | 3        | F3:1186 | OB5941 H1 raw.raw | 1.1654E6        | 2        | 2                   | 329   | 346 |                                     |                                                           | PEAKS DB  |
| I.PSGFISYILNR.H                                      | N    | 70.27  | 1265.6768 | 11     | 2.4  | 633.8472  | 2 | 36.17 | 2        | F2:1844 | OB5940 H1 raw.raw | 2.1876E5        | 2        | 2                   | 261   | 271 |                                     |                                                           | PEAKS DB  |
| R.EETSRNNPFYFSPSR.F                                  | N    | 69.88  | 1898.9023 | 15     | 1.2  | 633.9755  | 3 | 27.17 | 2        | F2:1289 | OB5940 H1 raw.raw | 7.2799E6        | 5        | 5                   | 161   | 175 |                                     |                                                           | PEAKS DB  |
| K.NPQLQDLDMMLTC(+57.02)VEIKEGALM(+15.99)LPHFNSK.A    | N    | 69.58  | 3387.6335 | 29     | -9.3 | 1130.2080 | 3 | 36.62 | 2        | F2:1874 | OB5940 H1 raw.raw | 2.6984E7        | 4        | 4                   | 415   | 443 | Carbamidomethylation; Oxidation (M) | C13:Carbamidomethylation:1000.00; M22:Oxidation (M):69.89 | PEAKS DB  |
| K.ISMPVNTPGQ(+.98)FEDFFPASSR.D                       | N    | 68.89  | 2227.0254 | 20     | 6.4  | 1114.5271 | 2 | 63.55 | 3        | F3:3427 | OB5941 H1 raw.raw | 9.613E3         | 2        | 2                   | 282   | 301 |                                     | Q10:Deamidation (N Q):33.26                               | PEAKS DB  |
| R.REQEWEEEEEEEEGSNR.E                                | N    | 68.88  | 2436.9424 | 19     | 2.8  | 1219.4819 | 2 | 26.47 | 3        | F3:1258 | OB5941 H1 raw.raw | 3.0427E4        | 2        | 2                   | 472   | 490 |                                     |                                                           | PEAKS DB  |
| R.IPSGFISY(+125.90)ILNR.H                            | N    | 68.75  | 1504.6575 | 12     | 1.5  | 753.3372  | 2 | 37.84 | 2        | F2:1946 | OB5940 H1 raw.raw | 9.8548E5        | 2        | 2                   | 260   | 271 | Iodination                          | Y8:Iodination:1000.00                                     | PEAKS PTM |
| R.NTLEAAFNAEFN(+.98)EIRR.V                           | N    | 68.73  | 1894.9172 | 16     | -3.7 | 948.4624  | 2 | 32.73 | 3        | F3:1640 | OB5941 H1 raw.raw | 4.5098E6        | 3        | 3                   | 313   | 328 | Deamidation (NQ)                    | N12:Deamidation (N Q):55.21                               | PEAKS DB  |
| R.N(+.98)TLEAAFNAEFNEIRR.V                           | N    | 67.69  | 1894.9172 | 16     | 2.2  | 948.4680  | 2 | 35.88 | 1        | F1:1787 | OB5939 H1 raw.raw | 6.2604E7        | 1        | 1                   | 313   | 328 | Deamidation (NQ)                    | N1:Deamidation (NQ):61.82                                 | PEAKS DB  |
| R.NNPFYFSPSR.F                                       | N    | 67.53  | 1296.6364 | 10     | 1.5  | 649.3264  | 2 | 28.95 | 1        | F1:1356 | OB5939 H1 raw.raw | 1.2601E8        | 9        | 9                   | 166   | 175 |                                     |                                                           | PEAKS DB  |

total 247 peptides

| Peptide                                            | Uniq | -10lgP | Mass      | Length | ppm  | m/z       | z | RT    | Fraction | Scan    | Source File       | Area raw peanut | #Feature | #Feature raw peanut | Start | End | PTM                  | AScore                                                   | Found By  |
|----------------------------------------------------|------|--------|-----------|--------|------|-----------|---|-------|----------|---------|-------------------|-----------------|----------|---------------------|-------|-----|----------------------|----------------------------------------------------------|-----------|
| K.KNPQLQDLDM(+15.99)MLTC(+57.02)VEIKEGALMLPHFNSK.A | N    | 66.89  | 3515.7285 | 30     | -3.1 | 879.9366  | 4 | 35.44 | 2        | F2:1830 | OB5940 H1 raw.raw | 7.3362E6        | 2        | 2                   | 414   | 443 | Carbamidomethylation | M10:Oxidation (M):11.06;C14:Carbamidomethylation:1000.00 | PEAKS DB  |
| K.HADADNILVIQQGQATVTVANGN(+.98)NRK.S               | N    | 66.81  | 2747.3950 | 26     | 3.3  | 916.8087  | 3 | 44.43 | 3        | F3:2322 | OB5941 H1 raw.raw | 2.5002E7        | 10       | 10                  | 223   | 248 |                      | N23:Deamidation (N Q):17.01                              | PEAKS DB  |
| K.KNPQLQDLDMMLTC(+57.02)VEIKEGALMLPHFNSK.A         | N    | 66.20  | 3499.7336 | 30     | -0.1 | 875.9406  | 4 | 36.52 | 3        | F3:1868 | OB5941 H1 raw.raw | 1.1425E7        | 3        | 3                   | 414   | 443 | Carbamidomethylation | C14:Carbamidomethylation:1000.00                         | PEAKS DB  |
| K.HADADNILVIQQGQ(+.98)ATVTVANGNNRK.S               | N    | 66.16  | 2747.3950 | 26     | 5.1  | 916.8103  | 3 | 44.47 | 1        | F1:2283 | OB5939 H1 raw.raw | 5.1832E5        | 2        | 2                   | 223   | 248 |                      | Q14:Deamidation (N Q):17.37                              | PEAKS DB  |
| K.SVSKKGSEEDITNPINLR.D                             | N    | 66.11  | 2115.0808 | 19     | 2.6  | 706.0361  | 3 | 27.22 | 3        | F3:1299 | OB5941 H1 raw.raw | 6.5352E4        | 2        | 2                   | 375   | 393 |                      |                                                          | PEAKS DB  |
| R.VLLEEN(+.98)AGGEQEER.G                           | N    | 66.02  | 1572.7267 | 14     | -3.7 | 787.3677  | 2 | 26.82 | 2        | F2:1276 | OB5940 H1 raw.raw | 0               | 0        | 0                   | 329   | 342 | Deamidation (NQ)     | N6:Deamidation (NQ):71.64                                | PEAKS DB  |
| R.IVQIEARPNTLVLPK.H                                | Y    | 65.77  | 1690.0140 | 15     | -3.0 | 846.0117  | 2 | 30.24 | 3        | F3:1474 | OB5941 H1 raw.raw | 2.8055E8        | 18       | 18                  | 208   | 222 |                      |                                                          | PEAKS DB  |
| R.EGEQEWGTP(+15.99)GSEVREETS.R                     | Y    | 65.62  | 2177.9460 | 19     | 1.3  | 726.9902  | 3 | 26.28 | 3        | F3:1241 | OB5941 H1 raw.raw | 4.9462E6        | 6        | 6                   | 147   | 165 | Hydroxylation Pro    | P9:Hydroxylation Pro:1000.00                             | PEAKS DB  |
| K.Q(-17.03)FQNLQNHR.I                              | N    | 65.38  | 1166.5581 | 9      | 2.4  | 584.2877  | 2 | 28.05 | 1        | F1:1306 | OB5939 H1 raw.raw | 3.4214E6        | 3        | 3                   | 199   | 207 | Pyro-glu from Q      | Q1:Pyro-glu from Q:1000.00                               | PEAKS PTM |
| K.NPQLQDLDMMLTCVEIK(+14.02)EGALMLPHFNSK.A          | N    | 64.78  | 3328.6328 | 29     | 1.8  | 1110.5536 | 3 | 38.03 | 2        | F2:1959 | OB5940 H1 raw.raw | 1.6164E7        | 6        | 6                   | 415   | 443 | Methylation(KR)      | K17:Methylation(KR):77.78                                | PEAKS PTM |
| I.FLAGDKDNVIDQIEK.Q                                | N    | 64.24  | 1703.8729 | 15     | -1.7 | 852.9423  | 2 | 32.19 | 1        | F1:1574 | OB5939 H1 raw.raw | 1.36E6          | 3        | 3                   | 537   | 551 |                      |                                                          | PEAKS DB  |
| R.EETSRNNPFYFPSR.R                                 | N    | 63.62  | 1742.8011 | 14     | -0.9 | 581.9405  | 3 | 29.89 | 1        | F1:1419 | OB5939 H1 raw.raw | 6.2933E4        | 1        | 1                   | 161   | 174 |                      |                                                          | PEAKS DB  |
| R.I(+27.99)FLAGDKDNVIDQIEK.Q                       | N    | 63.40  | 1844.9519 | 16     | 5.2  | 923.4880  | 2 | 36.16 | 3        | F3:1844 | OB5941 H1 raw.raw | 0               | 0        | 0                   | 536   | 551 | Formylation          | I1:Formylation:77.93                                     | PEAKS PTM |
| L.AGDKDNVIDQIEK.Q                                  | N    | 63.17  | 1443.7205 | 13     | -3.1 | 722.8653  | 2 | 32.19 | 1        | F1:1560 | OB5939 H1 raw.raw | 9.2796E5        | 2        | 2                   | 539   | 551 |                      |                                                          | PEAKS DB  |

total 247 peptides

| Peptide                                          | Uniq | -10lgP | Mass      | Length | ppm  | m/z       | z | RT    | Fraction | Scan    | Source File       | Area raw peanut | #Feature | #Feature raw peanut | Start | End | PTM                                | AScore                                                                            | Found By  |
|--------------------------------------------------|------|--------|-----------|--------|------|-----------|---|-------|----------|---------|-------------------|-----------------|----------|---------------------|-------|-----|------------------------------------|-----------------------------------------------------------------------------------|-----------|
| K.I(+43.01)S(+14.02)MPVNTPGQFEDFFPASSR.D         | N    | 62.82  | 2283.0630 | 20     | -0.1 | 1142.5387 | 2 | 35.84 | 1        | F1:1793 | OB5939 H1 raw.raw | 7.6784E5        | 1        | 1                   | 282   | 301 | Carbamylation; Methylation(others) | I1:Carbamylation:100.00;S2:Methylation(others):86.16                              | PEAKS PTM |
| R.IPSGFISYILN(-17.03)R.H                         | N    | 62.55  | 1361.7343 | 12     | 1.4  | 681.8754  | 2 | 37.47 | 2        | F2:1926 | OB5940 H1 raw.raw | 5.558E5         | 2        | 2                   | 260   | 271 | Ammonia-loss (N)                   | N11:Ammonia-loss (N):100.00                                                       | PEAKS PTM |
| K.HADADNILVIQQGQ(+.98)ATVTVAN(+.98)GNNRK.S       | N    | 62.38  | 2748.3792 | 26     | 2.7  | 917.1361  | 3 | 32.55 | 3        | F3:1635 | OB5941 H1 raw.raw | 5.5427E5        | 2        | 2                   | 223   | 248 |                                    | Q14:Deamidation (N Q):32.28;N21:Deamidation (NQ):14.04                            | PEAKS DB  |
| R.SSDNEGIVIVK.V                                  | N    | 62.38  | 1046.5244 | 10     | 0.3  | 524.2697  | 2 | 22.95 | 2        | F2:1057 | OB5940 H1 raw.raw | 2.5465E5        | 3        | 3                   | 351   | 360 |                                    |                                                                                   | PEAKS DB  |
| K.AM(+15.99)VIVVVNK.G                            | N    | 62.22  | 987.5787  | 9      | 0.3  | 494.7968  | 2 | 26.41 | 2        | F2:1234 | OB5940 H1 raw.raw | 8.6851E5        | 3        | 3                   | 444   | 452 | Oxidation (M)                      | M2:Oxidation (M):100.00                                                           | PEAKS DB  |
| A.GKDNVIDQIEK.Q                                  | N    | 62.19  | 1372.6833 | 12     | -2.8 | 687.3470  | 2 | 32.19 | 1        | F1:1561 | OB5939 H1 raw.raw | 1.5319E6        | 3        | 3                   | 540   | 551 |                                    |                                                                                   | PEAKS DB  |
| F.NLDEGHALR.I                                    | N    | 62.08  | 1023.5097 | 9      | 1.8  | 512.7631  | 2 | 27.87 | 1        | F1:1303 | OB5939 H1 raw.raw | 1.5945E6        | 3        | 3                   | 251   | 259 |                                    |                                                                                   | PEAKS DB  |
| Q.GQATVTVAN(+.98)GNNRK.S                         | N    | 62.04  | 1429.7273 | 14     | -1.0 | 715.8702  | 2 | 28.79 | 2        | F2:1402 | OB5940 H1 raw.raw | 6.6423E5        | 3        | 3                   | 235   | 248 |                                    | N9:Deamidation (NQ):41.83                                                         | PEAKS DB  |
| A.FPGSGEQVEK.L                                   | N    | 61.40  | 1076.5138 | 10     | 5.5  | 539.2672  | 2 | 30.23 | 1        | F1:1449 | OB5939 H1 raw.raw | 6.3559E4        | 1        | 1                   | 558   | 567 |                                    |                                                                                   | PEAKS DB  |
| K.HADADNILVIQ(+.98)Q(+.98)GQATVTVAN(+.98)GNNRK.S | N    | 60.41  | 2749.3630 | 26     | 9.6  | 917.4704  | 3 | 30.18 | 2        | F2:1540 | OB5940 H1 raw.raw | 4.3875E6        | 1        | 1                   | 223   | 248 |                                    | Q11:Deamidation (N Q):26.52;Q12:Deamidation (NQ):18.53;N21:Deamidation (NQ):14.04 | PEAKS DB  |
| K.SFNLDEGHALRIPSGFISYILNRHDNQNL.R.V              | N    | 60.12  | 3495.7759 | 30     | -1.0 | 700.1617  | 5 | 36.35 | 2        | F2:1862 | OB5940 H1 raw.raw | 7.0033E7        | 8        | 8                   | 249   | 278 |                                    |                                                                                   | PEAKS DB  |

total 247 peptides

| Peptide                                                   | Uniq | -10lgP | Mass      | Length | ppm  | m/z       | z | RT    | Fraction | Scan    | Source File       | Area raw peanut | #Feature | #Feature raw peanut | Start | End | PTM                                                                                    | AScore                                                                                                       | Found By  |
|-----------------------------------------------------------|------|--------|-----------|--------|------|-----------|---|-------|----------|---------|-------------------|-----------------|----------|---------------------|-------|-----|----------------------------------------------------------------------------------------|--------------------------------------------------------------------------------------------------------------|-----------|
| K.NPQLQ(+.98)DLDMMLTC(+57.02)VEIKEGALM(+15.99)LPHFNSK.A   | N    | 60.12  | 3388.6174 | 29     | -2.4 | 1130.5437 | 3 | 36.35 | 2        | F2:1874 | OB5940 H1 raw.raw | 6.4476E5        | 1        | 1                   | 415   | 443 | Carbamidomethylation; Oxidation (M)                                                    | Q5:Deamidation (NQ): 9.86; C13:Carbamidomethylation:1000.00; M22:Oxidation (M):54.40                         | PEAKS DB  |
| K.NPQLQDLDM(+15.99)M(+15.99)LTC(+57.02)VEIKEGALMLPHFNSK.A | N    | 60.05  | 3403.6284 | 29     | -4.3 | 1135.5452 | 3 | 35.63 | 3        | F3:1818 | OB5941 H1 raw.raw | 7.9921E5        | 1        | 1                   | 415   | 443 | Oxidation (M); Carbamidomethylation                                                    | M9:Oxidation (M):49.25; M10:Oxidation (M):53.09; C13:Carbamidomethylation:1000.00                            | PEAKS DB  |
| K.NPQLQ(+.98)DLDMMLTC(+57.02)VEIKEGALMLPHFNSK.A           | N    | 59.95  | 3372.6226 | 29     | 5.7  | 1125.2212 | 3 | 37.84 | 2        | F2:1936 | OB5940 H1 raw.raw | 5.4487E7        | 3        | 3                   | 415   | 443 | Carbamidomethylation                                                                   | Q5:Deamidation (NQ): 32.28; C13:Carbamidomethylation:1000.00                                                 | PEAKS DB  |
| R.I(+41.03)P(+15.99)SGFISYILNR.H                          | N    | 59.92  | 1435.7823 | 12     | -3.1 | 718.8962  | 2 | 36.92 | 1        | F1:1841 | OB5939 H1 raw.raw | 1.5727E7        | 4        | 4                   | 260   | 271 | Amidination of lysines or N-terminal amines with methyl acetimidate; Hydroxylation Pro | I1:Amidination of lysines or N-terminal amines with methyl acetimidate:1000.00; P2:Hydroxylation Pro:1000.00 | PEAKS PTM |
| K.A(+41.03)M(+15.99)VIVVVNKG TGNLELVAVR.K                 | N    | 59.12  | 2138.2246 | 20     | -4.5 | 1070.1147 | 2 | 33.90 | 2        | F2:1710 | OB5940 H1 raw.raw | 5.8929E6        | 3        | 3                   | 444   | 463 | Amidination of lysines or N-terminal amines with methyl acetimidate; Oxidation (M)     | A1:Amidination of lysines or N-terminal amines with methyl acetimidate:170.86; M2:Oxidation (M):1000.00      | PEAKS PTM |
| K.IRPEGREGGEQEWGTPGSEVREETSR.N                            | Y    | 58.78  | 2870.3542 | 25     | 1.1  | 957.7931  | 3 | 27.23 | 3        | F3:1290 | OB5941 H1 raw.raw | 4.3127E6        | 4        | 4                   | 141   | 165 |                                                                                        |                                                                                                              | PEAKS DB  |

total 247 peptides

| Peptide                                          | Uniq | -10lgP | Mass      | Length | ppm  | m/z       | z | RT    | Fraction | Scan    | Source File       | Area raw peanut | #Feature | #Feature raw peanut | Start | End | PTM                                  | AScore                                                                           | Found By  |
|--------------------------------------------------|------|--------|-----------|--------|------|-----------|---|-------|----------|---------|-------------------|-----------------|----------|---------------------|-------|-----|--------------------------------------|----------------------------------------------------------------------------------|-----------|
| E.PDLSNNFGR.L                                    | N    | 58.76  | 1018.4832 | 9      | -0.1 | 510.2488  | 2 | 31.24 | 3        | F3:1545 | OB5941 H1 raw.raw | 4.0306E6        | 3        | 3                   | 397   | 405 |                                      |                                                                                  | PEAKS DB  |
| K.HADADNILVIQQ(+.98)GQ(+.98)ATVTVAN(+.98)GNNRK.S | N    | 56.82  | 2749.3630 | 26     | 9.6  | 917.4704  | 3 | 30.18 | 2        | F2:1487 | OB5940 H1 raw.raw | 4.3875E6        | 1        | 1                   | 223   | 248 |                                      | Q12:Deamidation (NQ):14.02;Q14:Deamidation (NQ):13.03;N21:Deamidation (NQ):11.10 | PEAKS DB  |
| K.ISMPVNTPGQFEDFFPASSRDQSSYLQGFSR.N              | N    | 56.52  | 3494.6201 | 31     | 3.0  | 1748.3225 | 2 | 35.84 | 1        | F1:1789 | OB5939 H1 raw.raw | 9.3656E7        | 16       | 16                  | 282   | 312 |                                      |                                                                                  | PEAKS DB  |
| K.H(+42.01)(+15.99)ADADNILVIQQGQATVTVANGNNRK.S   | N    | 56.30  | 2804.4165 | 26     | -2.5 | 1403.2120 | 2 | 29.79 | 1        | F1:1416 | OB5939 H1 raw.raw | 2.4794E5        | 1        | 1                   | 223   | 248 | Acetylation (N-term); Oxidation (HW) | H1:Acetylation (N-term):100.00;H1:Oxidation (HW):100.00                          | PEAKS PTM |
| K.HADADN(+.98)ILVIQQGQATVTVANGNNRK.S             | N    | 55.97  | 2747.3950 | 26     | 3.7  | 916.8090  | 3 | 50.62 | 1        | F1:2616 | OB5939 H1 raw.raw | 5.4571E5        | 5        | 5                   | 223   | 248 |                                      | N6:Deamidation (NQ):42.57                                                        | PEAKS DB  |
| K.ISMP(+15.99)VNTPGQFEDFFPASSRDQSSYLQGFSR.N      | N    | 55.83  | 3510.6150 | 31     | 2.3  | 1171.2150 | 3 | 34.95 | 1        | F1:1731 | OB5939 H1 raw.raw | 0               | 0        | 0                   | 282   | 312 |                                      | P4:Hydroxylation Pro:49.79                                                       | PEAKS DB  |
| K.ISM(-48.00)PVNTPGQFEDFFPASSR.D                 | N    | 55.62  | 2178.0381 | 20     | 0.2  | 727.0201  | 3 | 32.37 | 1        | F1:1577 | OB5939 H1 raw.raw | 3.0139E7        | 6        | 6                   | 282   | 301 | Dethiomethyl                         | M3:Det hionet hyl:100.00                                                         | PEAKS PTM |
| K.N(+.98)PQLQDLDMMLTC(+57.02)VEIKEGALMLPHFNSK.A  | N    | 55.55  | 3372.6226 | 29     | 5.7  | 1125.2212 | 3 | 37.84 | 2        | F2:1983 | OB5940 H1 raw.raw | 1.3378E7        | 1        | 1                   | 415   | 443 | Carbamidomethylation                 | N1:Deamidation (NQ):14.04; C13:Carbamidomethylation:1000.00                      | PEAKS DB  |
| K.HADADNILVIQ(+.98)QGQATVTVAN(+.98)GNNRK.S       | N    | 55.03  | 2748.3792 | 26     | 5.1  | 1375.2039 | 2 | 31.28 | 1        | F1:1539 | OB5939 H1 raw.raw | 2.1986E5        | 2        | 2                   | 223   | 248 |                                      | Q11:Deamidation (NQ):15.10;N21:Deamidation (NQ):17.01                            | PEAKS DB  |
| K.HADADNILVIQ(+.98)QGQATVTVANGNNRK.S             | N    | 55.00  | 2747.3950 | 26     | 5.9  | 916.8110  | 3 | 45.04 | 3        | F3:2357 | OB5941 H1 raw.raw | 2.5167E4        | 1        | 1                   | 223   | 248 |                                      | Q11:Deamidation (NQ):9.34                                                        | PEAKS DB  |

total 247 peptides

| Peptide                                                  | Uniq | -10lgP | Mass      | Length | ppm  | m/z       | z | RT    | Fraction | Scan    | Source File       | Area raw peanut | #Feature | #Feature raw peanut | Start | End | PTM                  | AScore                                                                             | Found By  |
|----------------------------------------------------------|------|--------|-----------|--------|------|-----------|---|-------|----------|---------|-------------------|-----------------|----------|---------------------|-------|-----|----------------------|------------------------------------------------------------------------------------|-----------|
| K.NPQLQDLDM(+15.99)LTC(+57.02)VEIKEGALM(+15.99)LPHFNSK.A | N    | 54.50  | 3403.6284 | 29     | 4.5  | 1135.5552 | 3 | 36.52 | 3        | F3:1873 | OB5941 H1 raw.raw | 6.8814E5        | 2        | 2                   | 415   | 443 | Carbamidomethylation | M10:Oxidation (M):12.28;C13:Carbamido methylation:1000.00; M22:Oxidation (M):28.29 | PEAKS DB  |
| R.EQEWEEEEEEEEGSNREVR.R                                  | N    | 54.08  | 2665.0535 | 21     | 2.4  | 889.3606  | 3 | 27.87 | 1        | F1:1308 | OB5939 H1 raw.raw | 4.4193E5        | 2        | 2                   | 473   | 493 |                      |                                                                                    | PEAKS DB  |
| K.HADADNILVIQQ(+.98)GQATVTVANGNNRK.S                     | N    | 53.63  | 2747.3950 | 26     | 1.9  | 916.8074  | 3 | 39.56 | 2        | F2:2225 | OB5940 H1 raw.raw | 5.559E5         | 4        | 4                   | 223   | 248 |                      | Q12:Deamidation (N Q):11.24                                                        | PEAKS DB  |
| N.PFYFPSRR.F                                             | N    | 53.53  | 1068.5504 | 8      | 3.3  | 535.2842  | 2 | 28.95 | 1        | F1:1360 | OB5939 H1 raw.raw | 3.1024E6        | 3        | 3                   | 168   | 175 |                      |                                                                                    | PEAKS DB  |
| R.LFEVKPKDKNPQLQDLDM(+15.99)LTC(+57.02)VEIK.E            | N    | 53.37  | 3147.6018 | 26     | -4.4 | 787.9042  | 4 | 32.55 | 3        | F3:1633 | OB5941 H1 raw.raw | 2.1681E6        | 3        | 3                   | 406   | 431 | Carbamidomethylation | M19:Oxidation (M):17.01;C22:Carbamido methylation:1000.00                          | PEAKS DB  |
| K.HADADNILVIQQ(+.98)GQATVTVAN(+.98)GNNRK.S               | N    | 52.71  | 2748.3792 | 26     | 3.1  | 1375.2010 | 2 | 30.08 | 3        | F3:1495 | OB5941 H1 raw.raw | 1.5758E6        | 1        | 1                   | 223   | 248 |                      | Q12:Deamidation (N Q):27.58;N21:Deamidation (NQ):15.73                             | PEAKS DB  |
| K.NPQLQDLDMMLTCVEIK(+14.02)EGALM(+15.99)LPHFNSK.A        | N    | 52.56  | 3344.6277 | 29     | 4.1  | 837.1677  | 4 | 37.13 | 2        | F2:1903 | OB5940 H1 raw.raw | 1.5437E6        | 1        | 1                   | 415   | 443 | Oxidation (M)        | K17:Methylation (KR):24.93; M22:Oxidation (M):51.99                                | PEAKS PTM |
| K.ISM(+15.99)PVNTPGQFEDFFPASSRDQ(+.98)SSYLQGF.SR.N       | N    | 52.28  | 3511.5989 | 31     | 4.3  | 1171.5453 | 3 | 34.92 | 1        | F1:1731 | OB5939 H1 raw.raw | 1.6252E6        | 1        | 1                   | 282   | 312 | Oxidation (M)        | M3:Oxidation (M):1000.00; Q22:Deamidation (N Q):20.93                              | PEAKS DB  |
| R.NT(-18.01)LEAAFAEFNEIRR.V                              | N    | 52.23  | 1875.9227 | 16     | -2.4 | 626.3134  | 3 | 33.43 | 2        | F2:1683 | OB5940 H1 raw.raw | 1.354E7         | 3        | 3                   | 313   | 328 | Dehydration          | T2:Dehydration:1000.00                                                             | PEAKS PTM |
| L.EAAFAEFNEIRR.V                                         | N    | 52.09  | 1565.7585 | 13     | -4.7 | 783.8829  | 2 | 34.06 | 1        | F1:1677 | OB5939 H1 raw.raw | 1.7113E6        | 2        | 2                   | 316   | 328 |                      |                                                                                    | PEAKS DB  |

total 247 peptides

| Peptide                                      | Uniq | -10lgP | Mass      | Length | ppm  | m/z       | z | RT    | Fraction | Scan    | Source File       | Area raw peanut | #Feature | #Feature raw peanut | Start | End | PTM                                | AScore                                                          | Found By  |
|----------------------------------------------|------|--------|-----------|--------|------|-----------|---|-------|----------|---------|-------------------|-----------------|----------|---------------------|-------|-----|------------------------------------|-----------------------------------------------------------------|-----------|
| R.LFEVKPDK.K                                 | N    | 51.87  | 974.5436  | 8      | 0.9  | 488.2795  | 2 | 25.40 | 1        | F1:1153 | OB5939 H1 raw.raw | 7.0978E5        | 6        | 6                   | 406   | 413 |                                    |                                                                 | PEAKS DB  |
| R.WGPAEPR.E                                  | Y    | 51.81  | 811.3976  | 7      | 1.2  | 406.7066  | 2 | 25.31 | 3        | F3:1167 | OB5941 H1 raw.raw | 1.2136E6        | 3        | 3                   | 109   | 115 |                                    |                                                                 | PEAKS DB  |
| K.AM(-48.00)VIVVVNKG TGNLELVAVRK.E           | N    | 51.58  | 2161.2947 | 21     | 1.4  | 1081.6561 | 2 | 29.80 | 3        | F3:1453 | OB5941 H1 raw.raw | 6.785E6         | 4        | 4                   | 444   | 464 | Dethiomethyl                       | M2:Dehiomet hyl:100 0.00                                        | PEAKS PTM |
| R.IFLAGDKDNVIDQIEK(+14.02)(+43.01).Q         | N    | 51.42  | 1873.9785 | 16     | 1.0  | 937.9974  | 2 | 32.37 | 1        | F1:1563 | OB5939 H1 raw.raw | 1.103E7         | 1        | 1                   | 536   | 551 | Methylation(C-term); Carbamylation | K16:Me thylation(C-ter m):100 0.00;K 16:Car bamyla tion:16 4.73 | PEAKS PTM |
| K.HADADNILVIQQGQAT(-18.01)VTVAN(+.98)GNNRK.S | N    | 51.33  | 2729.3845 | 26     | -1.3 | 910.8009  | 3 | 31.10 | 3        | F3:1500 | OB5941 H1 raw.raw | 8.3833E5        | 2        | 2                   | 223   | 248 |                                    | T16:De hydrati on:11.9 9;N21: Deamid ation (NQ):1 3.67          | PEAKS PTM |
| K.S(+43.01)(+14.02)FNLDEGHALR.I              | N    | 51.03  | 1314.6316 | 11     | 0.8  | 658.3236  | 2 | 27.58 | 3        | F3:1340 | OB5941 H1 raw.raw | 4.5043E6        | 4        | 4                   | 249   | 259 | Carbamylation; Methylation(others) | S1:Car bamyla tion:10 00.00; S1:Met hylation (other s):109. 97  | PEAKS PTM |
| K.NPQLQDLDMM(+15.99)LTCVEIK(+14.02).E        | N    | 51.01  | 2019.9679 | 17     | -7.0 | 1010.9842 | 2 | 37.36 | 1        | F1:1877 | OB5939 H1 raw.raw | 0               | 0        | 0                   | 415   | 431 | Methylation(KR)                    | M10:Ox idation (M):11. 06;K1 7:Meth ylation (KR):1 000.00       | PEAKS PTM |
| R.RVLLEENAGGEQEERGQR.R                       | N    | 50.12  | 2069.0249 | 18     | 2.1  | 690.6837  | 3 | 24.88 | 2        | F2:1165 | OB5940 H1 raw.raw | 2.8524E5        | 1        | 1                   | 328   | 345 |                                    |                                                                 | PEAKS DB  |
| K.KNPQLQDLDMM(-48.00)LTC(+57.02)VEIK.E       | N    | 49.96  | 2127.0703 | 18     | 1.7  | 710.0319  | 3 | 30.71 | 2        | F2:1521 | OB5940 H1 raw.raw | 3.3467E6        | 2        | 2                   | 414   | 431 | Carbamidomethylation               | M11:De thiomet hyl:14. 02;C1 4:Carb amido methyl ation:1 000.00 | PEAKS PTM |
| N.LDEGHALR.I                                 | N    | 49.09  | 909.4668  | 8      | 0.6  | 455.7409  | 2 | 27.35 | 2        | F2:1312 | OB5940 H1 raw.raw | 3.1446E4        | 1        | 1                   | 252   | 259 |                                    |                                                                 | PEAKS DB  |
| K.KNPQLQDLDMMLTCVEIK(+14.02)EGALMLPHFNSK.A   | N    | 49.06  | 3456.7278 | 30     | 2.7  | 865.1915  | 4 | 36.90 | 2        | F2:1892 | OB5940 H1 raw.raw | 3.1386E5        | 1        | 1                   | 414   | 443 | Methylation(KR)                    | K18:Me thylatio n(KR): 50.90                                    | PEAKS PTM |

total 247 peptides

| Peptide                                                   | Uniq | -10lgP | Mass      | Length | ppm  | m/z       | z | RT    | Fraction | Scan    | Source File       | Area raw peanut | #Feature | #Feature raw peanut | Start | End | PTM                                    | AScore                                                                               | Found By |
|-----------------------------------------------------------|------|--------|-----------|--------|------|-----------|---|-------|----------|---------|-------------------|-----------------|----------|---------------------|-------|-----|----------------------------------------|--------------------------------------------------------------------------------------|----------|
| K.NPQLQDLDM(+15.99)LTC(+57.02)VEIKEGALMLPHFN(+.98)SK.A    | N    | 48.99  | 3388.6174 | 29     | 5.0  | 848.1659  | 4 | 36.17 | 3        | F3:1849 | OB5941 H1 raw.raw | 7.0919E6        | 2        | 2                   | 415   | 443 | Carbamidomethylation; Deamidation (NQ) | M10:Oxidation (M):0.00;C13:Carbamidomethylation:1000.00;N27:Deamidation (NQ):51.54   | PEAKS DB |
| K.HADADNILVIQQ(+.98)GQATVTVANGNN(+.98)RK.S                | N    | 48.74  | 2748.3792 | 26     | 8.9  | 917.1418  | 3 | 48.01 | 1        | F1:2471 | OB5939 H1 raw.raw | 2.2044E4        | 1        | 1                   | 223   | 248 |                                        | Q12:Deamidation (NQ):23.10;N24:Deamidation (NQ):0.00                                 | PEAKS DB |
| R.LFEVKPKDKKNPQLQDLDM(+15.99)M(+15.99)LTC(+57.02)VEIK.E   | N    | 48.67  | 3163.5967 | 26     | 2.1  | 791.9081  | 4 | 32.37 | 1        | F1:1585 | OB5939 H1 raw.raw | 6.4006E5        | 1        | 1                   | 406   | 431 | Oxidation (M); Carbamidomethylation    | M18:Oxidation (M):1000.00;M19:Oxidation (M):1000.00;C22:Carbamidomethylation:1000.00 | PEAKS DB |
| K.NPQLQDLDM(+15.99)MLTC(+57.02)VEIKEGALM(+15.99)LPHFNSK.A | N    | 48.60  | 3403.6284 | 29     | 2.2  | 851.9163  | 4 | 36.24 | 2        | F2:1851 | OB5940 H1 raw.raw | 3.928E6         | 2        | 2                   | 415   | 443 | Carbamidomethylation; Oxidation (M)    | M9:Oxidation (M):10.11;C13:Carbamidomethylation:1000.00;M22:Oxidation (M):53.09      | PEAKS DB |
| N.TPGQFEDFFPASSR.D                                        | N    | 48.49  | 1584.7208 | 14     | -0.2 | 793.3676  | 2 | 35.63 | 3        | F3:1821 | OB5941 H1 raw.raw | 2.7376E5        | 1        | 1                   | 288   | 301 |                                        |                                                                                      | PEAKS DB |
| K.ISMP(+15.99)VNTPGQFEDFFPASSR.D                          | N    | 48.39  | 2242.0364 | 20     | 6.5  | 1122.0327 | 2 | 45.36 | 1        | F1:2277 | OB5939 H1 raw.raw | 8.1169E4        | 2        | 2                   | 282   | 301 |                                        | P4:Hydroxylation Pro:33.81                                                           | PEAKS DB |
| R.NTLEAAFN(+.98)AEFNEIRR.V                                | N    | 48.19  | 1894.9172 | 16     | -0.3 | 948.4656  | 2 | 32.92 | 1        | F1:1570 | OB5939 H1 raw.raw | 1.5926E6        | 1        | 1                   | 313   | 328 |                                        | N8:Deamidation (NQ):8.26                                                             | PEAKS DB |
| K.NPQLQDLDMMLTC(+57.02)VEIKEGALMLPHFN(+.98)SK.A           | N    | 47.92  | 3372.6226 | 29     | 7.4  | 844.1691  | 4 | 37.85 | 2        | F2:1914 | OB5940 H1 raw.raw | 5.3901E7        | 2        | 2                   | 415   | 443 | Carbamidomethylation; Deamidation (NQ) | C13:Carbamidomethylation:1000.00;N27:Deamidation (NQ):61.84                          | PEAKS DB |
| total 247 peptides                                        |      |        |           |        |      |           |   |       |          |         |                   |                 |          |                     |       |     |                                        |                                                                                      |          |



| Peptide                                      | Uniq | -10lgP | Mass      | Length | ppm  | m/z       | z | RT    | Fraction | Scan    | Source File       | Area raw peanut | #Feature | #Feature raw peanut | Start | End | PTM                            | AScore                                                                              | Found By  |
|----------------------------------------------|------|--------|-----------|--------|------|-----------|---|-------|----------|---------|-------------------|-----------------|----------|---------------------|-------|-----|--------------------------------|-------------------------------------------------------------------------------------|-----------|
| K.ISMP(+15.99)VNTPGQ(+.98)FEDFFPASSR.D       | N    | 47.82  | 2243.0205 | 20     | 6.2  | 1122.5245 | 2 | 50.73 | 1        | F1:2643 | OB5939 H1 raw.raw | 0               | 0        | 0                   | 282   | 301 |                                | P4:Hydroxylation Pro:38.03; Q10:Deamidation (N Q):19.56                             | PEAKS DB  |
| R.SKQFQNLQNH.R                               | Y    | 47.59  | 1398.7117 | 11     | 1.0  | 467.2450  | 3 | 24.31 | 2        | F2:1132 | OB5940 H1 raw.raw | 2.9256E4        | 3        | 3                   | 197   | 207 |                                |                                                                                     | PEAKS DB  |
| R.K(+43.01)(+14.02)SFNLDEGHALR.I             | N    | 47.09  | 1442.7266 | 12     | -0.4 | 481.9159  | 3 | 25.70 | 3        | F3:1209 | OB5941 H1 raw.raw | 2.261E5         | 3        | 3                   | 248   | 259 | Carbamylation; Methylation(KR) | K1:Carbamylation:100.00; K1:Methylation (KR):160.69                                 | PEAKS PTM |
| K.ISM(+15.99)PVNTPGQFEDFFPASSRDQSSYLQGF.SR.N | N    | 47.05  | 3510.6150 | 31     | 4.2  | 1171.2172 | 3 | 34.34 | 2        | F2:1739 | OB5940 H1 raw.raw | 6.0177E6        | 2        | 2                   | 282   | 312 | Oxidation (M)                  | M3:Oxidation (M):100.00                                                             | PEAKS DB  |
| K.QFQNLQNH.R                                 | N    | 46.78  | 1183.5846 | 9      | 0.4  | 592.7998  | 2 | 23.96 | 2        | F2:1106 | OB5940 H1 raw.raw | 7.7423E4        | 5        | 5                   | 199   | 207 |                                |                                                                                     | PEAKS DB  |
| D.KDNVIDQIEK.Q                               | N    | 46.62  | 1200.6350 | 10     | -0.8 | 601.3243  | 2 | 25.89 | 3        | F3:1225 | OB5941 H1 raw.raw | 4.877E4         | 2        | 2                   | 542   | 551 |                                |                                                                                     | PEAKS DB  |
| K.AMVVVVN(+.98)KGTGNLELVAVRK.E               | N    | 46.54  | 2210.2820 | 21     | 9.6  | 737.7750  | 3 | 33.10 | 3        | F3:1695 | OB5941 H1 raw.raw | 8.2125E6        | 2        | 2                   | 444   | 464 |                                | N8:Deamidation (NQ):41.87                                                           | PEAKS DB  |
| Q.GQATVTVANGNNRK.S                           | N    | 46.45  | 1428.7433 | 14     | -0.2 | 715.3788  | 2 | 29.02 | 3        | F3:1412 | OB5941 H1 raw.raw | 1.3861E5        | 2        | 2                   | 235   | 248 |                                |                                                                                     | PEAKS DB  |
| R.EQEWEDEDEDEEGSNREVR.R                      | N    | 46.42  | 2821.1545 | 22     | 1.8  | 941.3939  | 3 | 26.75 | 1        | F1:1227 | OB5939 H1 raw.raw | 3.455E6         | 3        | 3                   | 473   | 494 |                                |                                                                                     | PEAKS DB  |
| K.Q(-17.03)AKDLAFPGSGEQVEK.L                 | N    | 45.78  | 1685.8260 | 16     | 0.9  | 843.9211  | 2 | 29.97 | 1        | F1:1427 | OB5939 H1 raw.raw | 0               | 0        | 0                   | 552   | 567 | Pyro-glu from Q                | Q1:Pyro-glu from Q:1000.00                                                          | PEAKS PTM |
| K.HADAD(-18.01)NILVIQGGQATVTVANGNNRK.S       | N    | 45.35  | 2728.4004 | 26     | 3.5  | 910.4772  | 3 | 28.70 | 2        | F2:1390 | OB5940 H1 raw.raw | 0               | 0        | 0                   | 223   | 248 |                                | D5:Dehydration:30.36                                                                | PEAKS PTM |
| K.KN(+.98)PQLQDLMM(+15.99)LTC(+57.02)VEIK.E  | N    | 44.87  | 2192.0527 | 18     | 9.2  | 1097.0437 | 2 | 32.33 | 2        | F2:1621 | OB5940 H1 raw.raw | 8.5764E4        | 1        | 1                   | 414   | 431 | Carbamidomethylation           | N2:Deamidation (NQ):14.04; M11:Oxidation (M):0.00; C14:Carbamidomethylation:1000.00 | PEAKS DB  |
| R.KSFNLDEGHALRIPSGFISYILN(+.98)R.H           | N    | 44.70  | 2747.4395 | 24     | 4.5  | 687.8702  | 4 | 36.15 | 3        | F3:1837 | OB5941 H1 raw.raw | 1.1013E6        | 1        | 1                   | 248   | 271 |                                | N23:Deamidation (N Q):0.00                                                          | PEAKS DB  |

total 247 peptides

| Peptide                                           | Uniq | -10lgP | Mass      | Length | ppm  | m/z       | z | RT    | Fraction | Scan    | Source File       | Area raw peanut | #Feature | #Feature raw peanut | Start | End | PTM                                                                                | AScore                                                                                                   | Found By  |
|---------------------------------------------------|------|--------|-----------|--------|------|-----------|---|-------|----------|---------|-------------------|-----------------|----------|---------------------|-------|-----|------------------------------------------------------------------------------------|----------------------------------------------------------------------------------------------------------|-----------|
| K.IRPEGREGGEQEWGTPGSEVR.E                         | Y    | 44.50  | 2268.0881 | 20     | 1.1  | 757.0375  | 3 | 26.28 | 3        | F3:1248 | OB5941 H1 raw.raw | 7.4174E4        | 2        | 2                   | 141   | 160 |                                                                                    |                                                                                                          | PEAKS DB  |
| W.GTPGSEVREETS.R                                  | Y    | 44.35  | 1403.6641 | 13     | 3.5  | 702.8417  | 2 | 27.60 | 3        | F3:1327 | OB5941 H1 raw.raw | 7.5188E4        | 1        | 1                   | 153   | 165 |                                                                                    |                                                                                                          | PEAKS DB  |
| K.A(+41.03)M(+15.99)VIVVVNKGTLNLELVAVRK.E         | N    | 44.32  | 2266.3196 | 21     | -1.6 | 1134.1653 | 2 | 32.33 | 2        | F2:1602 | OB5940 H1 raw.raw | 5.361E7         | 7        | 7                   | 444   | 464 | Amidination of lysines or N-terminal amines with methyl acetimidate; Oxidation (M) | A1:Amidination of lysines or N-terminal amines with methyl acetimidate: 161.20; M2:Oxidation (M):1000.00 | PEAKS PTM |
| V.QIARPNTLVLPK.H                                  | Y    | 43.15  | 1477.8616 | 13     | -3.7 | 739.9353  | 2 | 30.24 | 3        | F3:1485 | OB5941 H1 raw.raw | 1.0391E6        | 3        | 3                   | 210   | 222 |                                                                                    |                                                                                                          | PEAKS DB  |
| R.LFEVKPKDK.N                                     | N    | 43.08  | 1102.6385 | 9      | 1.1  | 552.3271  | 2 | 24.94 | 3        | F3:1179 | OB5941 H1 raw.raw | 2.3087E5        | 2        | 2                   | 406   | 414 |                                                                                    |                                                                                                          | PEAKS DB  |
| N.TLEAAFAEFNEIRR.V                                | N    | 43.00  | 1779.8904 | 15     | -3.0 | 890.9498  | 2 | 32.91 | 3        | F3:1655 | OB5941 H1 raw.raw | 4.3913E5        | 1        | 1                   | 314   | 328 |                                                                                    |                                                                                                          | PEAKS DB  |
| K.NPQLQDLDMMLTC(+57.02)VEIKEGALM(-48.00)LPHFNSK.A | N    | 42.94  | 3323.6353 | 29     | -1.0 | 831.9153  | 4 | 35.81 | 3        | F3:1829 | OB5941 H1 raw.raw | 2.5446E6        | 1        | 1                   | 415   | 443 | Carbamidomethylation                                                               | C13:Carbamidomethylation:1000.00; M22:Deamidation:30.24                                                  | PEAKS PTM |
| K.ISM(+15.99)PVN(+.98)TPGQFEDFFPASSR.D            | N    | 42.69  | 2243.0205 | 20     | 7.6  | 1122.5260 | 2 | 49.72 | 2        | F2:2625 | OB5940 H1 raw.raw | 0               | 0        | 0                   | 282   | 301 | Oxidation (M)                                                                      | M3:Oxidation (M):1000.00; N6:Deamidation (NQ):25.70                                                      | PEAKS DB  |
| K.KNPQLQ(+.98)DLDMMLTC(+57.02)VEIKEGALMLPHFNSK.A  | N    | 42.58  | 3500.7175 | 30     | 0.4  | 1167.9136 | 3 | 36.34 | 2        | F2:1850 | OB5940 H1 raw.raw | 5.0176E5        | 1        | 1                   | 414   | 443 | Carbamidomethylation                                                               | Q6:Deamidation (NQ):14.04; C14:Carbamidomethylation:1000.00                                              | PEAKS DB  |
| R.REQEWEEEEEEEEGSN(+.98)R.E                       | N    | 42.55  | 2437.9265 | 19     | 7.6  | 813.6556  | 3 | 26.55 | 1        | F1:1226 | OB5939 H1 raw.raw | 3.9265E4        | 1        | 1                   | 472   | 490 |                                                                                    | N18:Deamidation (NQ):0.00                                                                                | PEAKS DB  |

total 247 peptides

| Peptide                                                   | Uniq | -10lgP | Mass      | Length | ppm  | m/z       | z | RT    | Fraction | Scan    | Source File       | Area raw peanut | #Feature | #Feature raw peanut | Start | End | PTM                                | AScore                                                                             | Found By  |
|-----------------------------------------------------------|------|--------|-----------|--------|------|-----------|---|-------|----------|---------|-------------------|-----------------|----------|---------------------|-------|-----|------------------------------------|------------------------------------------------------------------------------------|-----------|
| K.NPQLQDLDMMLTC(+57.02)VEIK(+43.01)EGALMLPHFNSK(+14.02).A | N    | 42.54  | 3428.6602 | 29     | -4.2 | 1143.8892 | 3 | 37.82 | 3        | F3:1939 | OB5941 H1 raw.raw | 1.0346E6        | 1        | 1                   | 415   | 443 | Carbamidomethylation               | C13:Carbamidomethylation:1000.00;K17:Carbamylation:10.80;K29:Methylation(KR):10.80 | PEAKS PTM |
| K.HADADNILVIQ(+.98)QGQ(+.98)ATVTVANGNNRK.S                | N    | 42.52  | 2748.3792 | 26     | 3.1  | 917.1365  | 3 | 57.24 | 2        | F2:3064 | OB5940 H1 raw.raw | 0               | 0        | 0                   | 223   | 248 |                                    | Q11:Deamidation(NQ):0.00;Q14:Deamidation(NQ):0.00                                  | PEAKS DB  |
| R.IFLAGDKDNVIDQIEK(+43.01)QAK(+14.02).D                   | N    | 42.41  | 2201.1692 | 19     | 2.7  | 734.7323  | 3 | 32.55 | 1        | F1:1581 | OB5939 H1 raw.raw | 3.5153E6        | 1        | 1                   | 536   | 554 |                                    | K16:Carbamylation:0.00;K19:Methylation(KR):0.00                                    | PEAKS PTM |
| K.GTGNLELVAVRKEQQQR.G                                     | N    | 41.95  | 1925.0442 | 17     | 1.8  | 642.6898  | 3 | 26.36 | 1        | F1:1214 | OB5939 H1 raw.raw | 1.4197E5        | 3        | 3                   | 453   | 469 |                                    |                                                                                    | PEAKS DB  |
| R.IFLAGDKDNVIDQIEK(+14.02)Q(+.98)AK(+42.01).D             | N    | 41.87  | 2201.1580 | 19     | 3.1  | 734.7289  | 3 | 31.83 | 2        | F2:1588 | OB5940 H1 raw.raw | 3.595E6         | 2        | 2                   | 536   | 554 |                                    | K16:Methylation(KR):13.38;Q17:Deamidation(NQ):25.11;K19:Acetylation(K):13.38       | PEAKS PTM |
| K.D(+43.01)(+14.02)LAFPGSGEQVEK.L                         | N    | 41.75  | 1432.6833 | 13     | 3.8  | 717.3517  | 2 | 30.92 | 1        | F1:1485 | OB5939 H1 raw.raw | 2.8695E5        | 1        | 1                   | 555   | 567 | Carbamylation; Methylation(others) | D1:Carbamylation:16.634;D1:Methylation(others):102.87                              | PEAKS PTM |
| R.IFLAGDKDNVIDQ(+.98)IEK.Q                                | N    | 41.66  | 1817.9410 | 16     | 9.1  | 909.9861  | 2 | 66.49 | 2        | F2:3489 | OB5940 H1 raw.raw | 4.5271E4        | 3        | 3                   | 536   | 551 |                                    | Q13:Deamidation(NQ):38.67                                                          | PEAKS DB  |
| L.DEGHALR.I                                               | N    | 40.78  | 796.3828  | 7      | 2.3  | 399.1996  | 2 | 27.48 | 2        | F2:1315 | OB5940 H1 raw.raw | 2.4528E4        | 1        | 1                   | 253   | 259 |                                    |                                                                                    | PEAKS DB  |

total 247 peptides

| Peptide                                                   | Uniq | -10lgP | Mass      | Length | ppm   | m/z       | z | RT    | Fraction | Scan    | Source File       | Area raw peanut | #Feature | #Feature raw peanut | Start | End | PTM                                     | AScore                                                                              | Found By  |
|-----------------------------------------------------------|------|--------|-----------|--------|-------|-----------|---|-------|----------|---------|-------------------|-----------------|----------|---------------------|-------|-----|-----------------------------------------|-------------------------------------------------------------------------------------|-----------|
| K.HADADNILVIQ(+.98)QGQATVTVANGN(+.98)NRK.S                | N    | 40.70  | 2748.3792 | 26     | 8.8   | 917.1417  | 3 | 55.82 | 2        | F2:2975 | OB5940 H1 raw.raw | 2.5591E3        | 1        | 1                   | 223   | 248 |                                         | Q11:Deamidation (N Q):0.00;N23:Deamidation (NQ):0.00                                | PEAKS DB  |
| K.ISMPVN(+.98)TPGQFEDFFPASSR.D                            | N    | 40.63  | 2227.0254 | 20     | 9.3   | 1114.5303 | 2 | 58.23 | 3        | F3:3170 | OB5941 H1 raw.raw | 2.6294E4        | 2        | 2                   | 282   | 301 |                                         | N6:Deamidation (NQ):42.89                                                           | PEAKS DB  |
| R.IFLAGD(+14.02)K(+43.01)DNVIDQIEK.Q                      | N    | 40.36  | 1873.9785 | 16     | -5.0  | 937.9919  | 2 | 32.19 | 3        | F3:1583 | OB5941 H1 raw.raw | 4.0088E7        | 4        | 4                   | 536   | 551 | Carbamylation                           | D6: Methylation (others):24.32;K7:Carbamylation:57.71                               | PEAKS PTM |
| K.KN(+.98)PQLQDLDMMLTC(+57.02)VEIKEGALMLPHFNSK.A          | N    | 40.34  | 3500.7175 | 30     | 7.1   | 876.1929  | 4 | 36.26 | 2        | F2:1847 | OB5940 H1 raw.raw | 2.213E6         | 1        | 1                   | 414   | 443 | Carbamidomethylation                    | N2:Deamidation (NQ):0.00;C14:Carbamidomethylation:1000.00                           | PEAKS DB  |
| K.NPQLQLDLM(+15.99)MLTC(+57.02)VEIKEGALMLP(+15.99)HFNSK.A | N    | 40.24  | 3403.6284 | 29     | -10.2 | 851.9057  | 4 | 36.72 | 1        | F1:1838 | OB5939 H1 raw.raw | 0               | 0        | 0                   | 415   | 443 | Carbamidomethylation; Hydroxylation Pro | M9:Oxidation (M):26.02;C13:Carbamidomethylation:1000.00;P24:Hydroxylation Pro:63.93 | PEAKS DB  |
| R.ESHFVSARPQSQSP(+15.99)SSPEKEDQEEEN.Q                    | N    | 40.09  | 2973.2859 | 26     | -2.5  | 992.1001  | 3 | 25.16 | 1        | F1:1143 | OB5939 H1 raw.raw | 0               | 0        | 0                   | 574   | 599 |                                         | P14:Hydroxylation Pro:29.32                                                         | PEAKS DB  |
| K.SFN(+.98)LDEGHALRIPSGFISYILNR.H                         | N    | 39.87  | 2619.3445 | 23     | 9.3   | 655.8495  | 4 | 38.22 | 1        | F1:1947 | OB5939 H1 raw.raw | 1.0439E6        | 2        | 2                   | 249   | 271 |                                         | N3:Deamidation (NQ):39.81                                                           | PEAKS DB  |
| T.PGQFEDFFPASSR.D                                         | N    | 39.65  | 1483.6731 | 13     | -1.3  | 742.8429  | 2 | 40.34 | 2        | F2:2103 | OB5940 H1 raw.raw | 3.5787E3        | 1        | 1                   | 289   | 301 |                                         |                                                                                     | PEAKS DB  |
| K.EGALM(-48.00)LPHFNSK.A                                  | N    | 38.72  | 1294.6670 | 12     | 2.0   | 432.5638  | 3 | 28.31 | 3        | F3:1348 | OB5941 H1 raw.raw | 1.3523E6        | 1        | 1                   | 432   | 443 | Dethiomethyl                            | M5:Detachment:1000.00                                                               | PEAKS PTM |
| K.ISMPVNTPGQ(+.98)FEDFFPASSRDQSSYLQGFSR.N                 | N    | 38.62  | 3495.6040 | 31     | 6.7   | 1166.2164 | 3 | 54.16 | 3        | F3:2883 | OB5941 H1 raw.raw | 0               | 0        | 0                   | 282   | 312 |                                         | Q10:Deamidation (N Q):5.38                                                          | PEAKS DB  |
| R.DQS(-18.01)SYLQGFSR.N                                   | N    | 38.22  | 1268.5785 | 11     | 7.0   | 635.3010  | 2 | 30.87 | 1        | F1:1484 | OB5939 H1 raw.raw | 0               | 0        | 0                   | 302   | 312 |                                         | S3:Dehydration:33.98                                                                | PEAKS PTM |

total 247 peptides

| Peptide                                                       | Uniq | -10lgP | Mass      | Length | ppm  | m/z       | z | RT    | Fraction | Scan    | Source File       | Area raw peanut | #Feature | #Feature raw peanut | Start | End | PTM                                 | AScore                                                                                                         | Found By  |
|---------------------------------------------------------------|------|--------|-----------|--------|------|-----------|---|-------|----------|---------|-------------------|-----------------|----------|---------------------|-------|-----|-------------------------------------|----------------------------------------------------------------------------------------------------------------|-----------|
| K.N(+.98)PQ(+.98)LQDLDMMLTC(+57.02)VEIKEGALM(+15.99)LPHFNSK.A | N    | 37.95  | 3389.6016 | 29     | 9.0  | 848.4153  | 4 | 36.92 | 1        | F1:1851 | OB5939 H1 raw.raw | 8.517E6         | 2        | 2                   | 415   | 443 | Carbamidomethylation                | N1:Deamidation (NQ):11.12; Q3:Deamidation (NQ):0.00; C13:Carbamidomethylation:1000.00; M22:Oxidation (M):24.93 | PEAKS DB  |
| K.SFN(+.98)LDEGHALRIPSGFISYILNRHDNQNL.R.V                     | N    | 37.76  | 3496.7600 | 30     | -3.9 | 700.3566  | 5 | 36.38 | 1        | F1:1849 | OB5939 H1 raw.raw | 7.9247E5        | 1        | 1                   | 249   | 278 |                                     | N3:Deamidation (NQ):20.27                                                                                      | PEAKS DB  |
| R.E(-18.01)GEQEWGTPGSEVREETS.R.N                              | Y    | 37.06  | 2143.9407 | 19     | 2.9  | 715.6562  | 3 | 27.17 | 2        | F2:1294 | OB5940 H1 raw.raw | 9.0561E4        | 1        | 1                   | 147   | 165 | Pyro-glu from E                     | E1:Pyro-glu from E:1000.00                                                                                     | PEAKS PTM |
| K.NPQLQDLDM(-48.00)LTC(+57.02)VEIKEGALMLPHFNSK.A              | N    | 36.81  | 3323.6353 | 29     | 0.8  | 1108.8866 | 3 | 35.97 | 3        | F3:1833 | OB5941 H1 raw.raw | 5.0189E6        | 2        | 2                   | 415   | 443 | Carbamidomethylation                | M10:Deamidation:8.14; C13:Carbamidomethylation:1000.00                                                         | PEAKS PTM |
| R.LFEVKPDKKN(+.98)PQLQDLDMMLTC(+57.02)VEIK.E                  | N    | 36.71  | 3132.5908 | 26     | 9.3  | 1567.3173 | 2 | 34.35 | 3        | F3:1745 | OB5941 H1 raw.raw | 2.2872E5        | 1        | 1                   | 406   | 431 | Carbamidomethylation                | N10:Deamidation (NQ):14.04; C22:Carbamidomethylation:1000.00                                                   | PEAKS DB  |
| R.IVQIEAR(+28.03)PN(+.98)TLVLPK.H                             | Y    | 36.70  | 1719.0294 | 15     | 0.1  | 860.5220  | 2 | 30.00 | 2        | F2:1445 | OB5940 H1 raw.raw | 1.1278E7        | 2        | 2                   | 208   | 222 | Dimethylation(KR); Deamidation (NQ) | R7:Dimethylation(KR):71.07; N9:Deamidation (NQ):90.21                                                          | PEAKS PTM |
| R.ESHFVSARPSQSP(+15.99)SSPEKEDQEEE.N                          | N    | 36.67  | 2859.2429 | 25     | 2.6  | 954.0907  | 3 | 24.51 | 2        | F2:1151 | OB5940 H1 raw.raw | 1.0898E4        | 1        | 1                   | 574   | 598 |                                     | P14:Hydroxylation Pro:12.33                                                                                    | PEAKS DB  |
| K.NPQLQDLDM(+15.99)M(+15.99)LTC(+57.02)VEIK.E                 | N    | 36.40  | 2078.9688 | 17     | 1.1  | 1040.4928 | 2 | 33.80 | 3        | F3:1701 | OB5941 H1 raw.raw | 0               | 0        | 0                   | 415   | 431 | Oxidation (M); Carbamidomethylation | M9:Oxidation (M):1000.00; M10:Oxidation (M):1000.00; C13:Carbamidomethylation:1000.00                          | PEAKS DB  |
| total 247 peptides                                            |      |        |           |        |      |           |   |       |          |         |                   |                 |          |                     |       |     |                                     |                                                                                                                |           |

| Peptide                                               | Uniq | -10lgP | Mass      | Length | ppm  | m/z       | z | RT    | Fraction | Scan    | Source File       | Area raw peanut | #Feature | #Feature raw peanut | Start | End | PTM                                           | AScore                                                                             | Found By  |
|-------------------------------------------------------|------|--------|-----------|--------|------|-----------|---|-------|----------|---------|-------------------|-----------------|----------|---------------------|-------|-----|-----------------------------------------------|------------------------------------------------------------------------------------|-----------|
| R.IVQIEARPNTLVLP(+15.99)K(-.98)(+42.01).H             | Y    | 36.38  | 1747.0355 | 15     | -2.4 | 874.5229  | 2 | 30.35 | 2        | F2:1460 | OB5940 H1 raw.raw | 8.4907E6        | 1        | 1                   | 208   | 222 | Hydroxylation Pro; Amidation; Acetylation (K) | P14:Hydroxylation Pro:74.55;K15:Amidation:100.00;K15:Acetylation (K):100.00        | PEAKS PTM |
| R.N(-17.03)NPFYFPSRR.F                                | N    | 36.19  | 1279.6097 | 10     | -0.4 | 427.5437  | 3 | 28.25 | 2        | F2:1369 | OB5940 H1 raw.raw | 1.5243E5        | 1        | 1                   | 166   | 175 |                                               | N1:Ammonia-Ioss (N):0.00                                                           | PEAKS PTM |
| K.AM(+31.99)VIVVVKGTGNLELVAVRK.E                      | N    | 36.16  | 2241.2878 | 21     | 1.1  | 748.1041  | 3 | 31.46 | 1        | F1:1540 | OB5939 H1 raw.raw | 1.7223E5        | 1        | 1                   | 444   | 464 | Sulphone                                      | M2:Sulphone:1000.00                                                                | PEAKS PTM |
| K.NPQ(+.98)LQDLDMMLTC(+57.02)VEIKEGALMLPHFNSK.A       | N    | 36.11  | 3372.6226 | 29     | 9.4  | 1125.2253 | 3 | 40.75 | 1        | F1:2064 | OB5939 H1 raw.raw | 5.8612E5        | 1        | 1                   | 415   | 443 | Carbamidomethylation                          | Q3:Deamidation (NQ):0.00;C13:Carbamidomethylation:1000.00                          | PEAKS DB  |
| K.N(+.98)PQ(+.98)LQDLDMMLTC(+57.02)VEIKEGALMLPHFNSK.A | N    | 35.87  | 3373.6067 | 29     | 9.1  | 1687.8259 | 2 | 38.03 | 2        | F2:1999 | OB5940 H1 raw.raw | 2.685E5         | 1        | 1                   | 415   | 443 | Carbamidomethylation                          | N1:Deamidation (NQ):3.13;Q3:Deamidation (NQ):5.47;C13:Carbamidomethylation:1000.00 | PEAKS DB  |
| T.PGSEVRETSR.N                                        | Y    | 35.66  | 1245.5948 | 11     | 1.9  | 623.8059  | 2 | 27.69 | 1        | F1:1287 | OB5939 H1 raw.raw | 8.4353E4        | 2        | 2                   | 155   | 165 |                                               |                                                                                    | PEAKS DB  |
| K.EGALMLPH(+14.02)FNSK.A                              | N    | 35.50  | 1356.6860 | 12     | 1.3  | 679.3512  | 2 | 30.49 | 3        | F3:1499 | OB5941 H1 raw.raw | 2.5433E4        | 1        | 1                   | 432   | 443 | Methylation(others)                           | H8:Methylation (others):53.53                                                      | PEAKS PTM |
| I.PSGFISYILNRHDNQNL.R.V                               | N    | 35.49  | 2143.0923 | 18     | 4.0  | 715.3742  | 3 | 33.53 | 1        | F1:1645 | OB5939 H1 raw.raw | 0               | 0        | 0                   | 261   | 278 |                                               |                                                                                    | PEAKS DB  |
| R.VLLE(+21.98)ENAGGEQEER.G                            | N    | 35.40  | 1593.7246 | 14     | -0.7 | 797.8690  | 2 | 26.03 | 2        | F2:1239 | OB5940 H1 raw.raw | 1.529E5         | 3        | 3                   | 329   | 342 |                                               | E4:Sodium adduct:40.00                                                             | PEAKS PTM |
| K.KGSEEDIT(-18.01)N(+.98)PINLR.D                      | N    | 35.32  | 1696.8268 | 15     | 0.0  | 566.6162  | 3 | 29.14 | 1        | F1:1369 | OB5939 H1 raw.raw | 6.926E4         | 1        | 1                   | 379   | 393 |                                               | T9:Dehydration:11.50;N10:Deamidation (NQ):25.67                                    | PEAKS PTM |

total 247 peptides

| Peptide                                                  | Uniq | -10lgP | Mass      | Length | ppm  | m/z      | z | RT    | Fraction | Scan    | Source File       | Area raw peanut | #Feature | #Feature raw peanut | Start | End | PTM                                                    | AScore                                                                                | Found By  |
|----------------------------------------------------------|------|--------|-----------|--------|------|----------|---|-------|----------|---------|-------------------|-----------------|----------|---------------------|-------|-----|--------------------------------------------------------|---------------------------------------------------------------------------------------|-----------|
| K.NP(+15.99)QLQDLDM(+15.99)LTC(+57.02)VEIKEGALMLPHFNSK.A | N    | 35.20  | 3403.6284 | 29     | -3.4 | 851.9115 | 4 | 35.28 | 1        | F1:1792 | OB5939 H1 raw.raw | 1.7685E6        | 1        | 1                   | 415   | 443 | Carbamidomethylation                                   | P2:Hydroxylation Pro:48.46; M10:Oxidation (M):11.06; C13:Carbamidomethylation:1000.00 | PEAKS DB  |
| K.SFNLDEGH(+15.99)ALRIPSGFISYILNR.H                      | N    | 35.13  | 2634.3555 | 23     | -0.4 | 879.1254 | 3 | 38.33 | 2        | F2:1974 | OB5940 H1 raw.raw | 0               | 0        | 0                   | 249   | 271 | Oxidation (HW)                                         | H8:Oxidation (HW):1000.00                                                             | PEAKS PTM |
| K.KGSEEDITN(-17.03)PINLR.D                               | N    | 34.98  | 1696.8268 | 15     | 3.3  | 566.6180 | 3 | 28.85 | 3        | F3:1397 | OB5941 H1 raw.raw | 3.0405E5        | 1        | 1                   | 379   | 393 |                                                        | N10:Ammonia-loss (N):40.63                                                            | PEAKS PTM |
| K.HADADNILVIQQ(-18.01).G                                 | N    | 34.95  | 1317.6677 | 12     | -4.9 | 659.8379 | 2 | 29.56 | 3        | F3:1421 | OB5941 H1 raw.raw | 1.0066E5        | 1        | 1                   | 223   | 234 | Dehydration                                            | Q12:Dehydration:76.18                                                                 | PEAKS PTM |
| K.GT(-18.01)GNLELVAVRK.E                                 | N    | 34.88  | 1237.7142 | 12     | 0.9  | 413.5790 | 3 | 26.41 | 2        | F2:1259 | OB5940 H1 raw.raw | 7.6712E5        | 3        | 3                   | 453   | 464 | Dehydration                                            | T2:Dehydration:1000.00                                                                | PEAKS PTM |
| K.NPQLQDLDM(-48.00)MLTC(+57.02)VEIKEGALMLPHFNSK.A        | N    | 34.70  | 3323.6353 | 29     | 8.1  | 831.9229 | 4 | 35.72 | 2        | F2:1816 | OB5940 H1 raw.raw | 1.6745E6        | 2        | 2                   | 415   | 443 | Carbamidomethylation                                   | M9:Dehydration:17.01; C13:Carbamidomethylation:1000.00                                | PEAKS PTM |
| R.IFLAGDKDNVIDQ(+15.00)IEK(+42.01).Q                     | N    | 34.39  | 1873.9673 | 16     | -4.1 | 937.9871 | 2 | 31.58 | 2        | F2:1569 | OB5940 H1 raw.raw | 0               | 0        | 0                   | 536   | 551 | Deamidation followed by a methylation; Acetylation (K) | Q13:Deamidation followed by a methylation:72.09; K16:Acetylation (K):97.49            | PEAKS PTM |
| K.HADADN(+.98)ILVIQQGQATVTVAN(+.98)GNNRK.S               | N    | 34.16  | 2748.3792 | 26     | 8.9  | 917.1418 | 3 | 48.01 | 1        | F1:2528 | OB5939 H1 raw.raw | 2.2044E4        | 1        | 1                   | 223   | 248 |                                                        | N6:Deamidation (NQ):10.34; N21:Deamidation (NQ):14.04                                 | PEAKS DB  |
| N.PQLQDLDMMLTC(+57.02)VEIKEGALMLPHFNSK.A                 | N    | 34.02  | 3257.5957 | 28     | 0.9  | 815.4069 | 4 | 37.83 | 3        | F3:1952 | OB5941 H1 raw.raw | 2.5417E5        | 1        | 1                   | 416   | 443 | Carbamidomethylation                                   | C12:Carbamidomethylation:1000.00                                                      | PEAKS DB  |
| R.PNTLVLPK.H                                             | N    | 33.50  | 880.5382  | 8      | 0.4  | 441.2766 | 2 | 27.53 | 2        | F2:1313 | OB5940 H1 raw.raw | 8.6509E4        | 1        | 1                   | 215   | 222 |                                                        |                                                                                       | PEAKS DB  |

total 247 peptides

| Peptide                                      | Uniq | -10lgP | Mass      | Length | ppm  | m/z       | z | RT    | Fraction | Scan    | Source File       | Area raw peanut | #Feature | #Feature raw peanut | Start | End | PTM                                | AScore                                                                             | Found By  |
|----------------------------------------------|------|--------|-----------|--------|------|-----------|---|-------|----------|---------|-------------------|-----------------|----------|---------------------|-------|-----|------------------------------------|------------------------------------------------------------------------------------|-----------|
| R.IFLAGD(-18.01)KDNVIDQIEK.Q                 | N    | 33.20  | 1798.9464 | 16     | -2.5 | 600.6546  | 3 | 31.45 | 2        | F2:1554 | OB5940 H1 raw.raw | 1.217E6         | 1        | 1                   | 536   | 551 |                                    | D6:Dehydration:31.02                                                               | PEAKS PTM |
| K.G(+43.01)T(+14.02)GNLELVAVRK.E             | N    | 33.06  | 1312.7462 | 12     | -0.8 | 657.3799  | 2 | 26.85 | 3        | F3:1280 | OB5941 H1 raw.raw | 3.165E5         | 2        | 2                   | 453   | 464 | Carbamylation; Methylation(others) | G1:Carbamylation:148.28;T2:Methylation(others):59.30                               | PEAKS PTM |
| R.IPSGFISYILN(+.98)RHDNQNL.R                 | N    | 33.06  | 2257.1604 | 19     | 9.2  | 565.3026  | 4 | 35.09 | 3        | F3:1797 | OB5941 H1 raw.raw | 1.752E6         | 1        | 1                   | 260   | 278 |                                    | N11:Deamidation (NQ):16.76                                                         | PEAKS DB  |
| R.REQEWEEEEEEEEEGSNREVR.R                    | N    | 33.06  | 2821.1545 | 22     | 3.9  | 941.3958  | 3 | 26.47 | 3        | F3:1247 | OB5941 H1 raw.raw | 1.8551E6        | 1        | 1                   | 472   | 493 |                                    |                                                                                    | PEAKS DB  |
| R.IPSGFISYILN(+.98)R(+14.02)H(+42.01)DNQNL.R | N    | 32.77  | 2313.1865 | 19     | 6.8  | 579.3079  | 4 | 33.29 | 1        | F1:1633 | OB5939 H1 raw.raw | 2.3452E7        | 3        | 3                   | 260   | 278 |                                    | N11:Deamidation (NQ):35.13;R12:Methylation(KR):45.25;H13:Acetylation (TSCYH):27.86 | PEAKS PTM |
| Q.IEARPNTLVLPK.H                             | Y    | 32.24  | 1349.8030 | 12     | 2.2  | 675.9103  | 2 | 30.40 | 1        | F1:1461 | OB5939 H1 raw.raw | 7.0908E5        | 2        | 2                   | 211   | 222 |                                    |                                                                                    | PEAKS DB  |
| K.HADADNILVIQQGQ(+.98)ATVTVANGNN(+.98)RK.S   | N    | 32.00  | 2748.3792 | 26     | 7.7  | 917.1407  | 3 | 55.56 | 2        | F2:2966 | OB5940 H1 raw.raw | 0               | 0        | 0                   | 223   | 248 |                                    | Q14:Deamidation (NQ):19.05;N24:Deamidation (NQ):0.00                               | PEAKS DB  |
| R.EGEQEW(+15.99)GTPGSEVRETSR.N               | Y    | 31.83  | 2177.9460 | 19     | 2.6  | 1089.9832 | 2 | 26.55 | 1        | F1:1197 | OB5939 H1 raw.raw | 2.78E4          | 1        | 1                   | 147   | 165 | Oxidation (HW)                     | W6:Oxidation (HW):1000.00                                                          | PEAKS PTM |
| K.AMVIVVVK(-1.03)GTGNLELVAVR.K               | N    | 31.46  | 2080.1714 | 20     | 4.3  | 1041.0974 | 2 | 33.79 | 2        | F2:1738 | OB5940 H1 raw.raw | 2.5754E7        | 1        | 1                   | 444   | 463 | Lysine oxidation to aminoaldehyde  | K9:Lysine oxidation to aminoaldehyde:1000.00                                       | PEAKS PTM |
| K.HADADNILVIQQGQATVTVANGN(+.98)N(+.98)RK.S   | N    | 31.37  | 2748.3792 | 26     | 5.7  | 917.1389  | 3 | 45.07 | 1        | F1:2318 | OB5939 H1 raw.raw | 5.4428E3        | 1        | 1                   | 223   | 248 |                                    | N23:Deamidation (NQ):0.00;N24:Deamidation (NQ):0.00                                | PEAKS DB  |

total 247 peptides



| Peptide                                   | Uniq | -10lgP | Mass      | Length | ppm  | m/z       | z | RT    | Fraction | Scan    | Source File       | Area raw peanut | #Feature | #Feature raw peanut | Start | End | PTM                  | AScore                                              | Found By  |
|-------------------------------------------|------|--------|-----------|--------|------|-----------|---|-------|----------|---------|-------------------|-----------------|----------|---------------------|-------|-----|----------------------|-----------------------------------------------------|-----------|
| R.IFLAGDKDNVID.Q                          | N    | 31.18  | 1318.6769 | 12     | 1.8  | 660.3469  | 2 | 31.65 | 1        | F1:1537 | OB5939 H1 raw.raw | 9.3082E4        | 1        | 1                   | 536   | 547 |                      |                                                     | PEAKS DB  |
| R.EREEDWRQPR.E                            | N    | 31.07  | 1399.6592 | 10     | 0.1  | 467.5604  | 3 | 24.77 | 3        | F3:1154 | OB5941 H1 raw.raw | 2.8345E4        | 1        | 1                   | 118   | 127 |                      |                                                     | PEAKS DB  |
| K.S(-18.01)FNLDEGHALRIPSGFISYILNR.H       | N    | 30.52  | 2600.3499 | 23     | -0.3 | 651.0945  | 4 | 37.85 | 1        | F1:1904 | OB5939 H1 raw.raw | 4.9973E5        | 1        | 1                   | 249   | 271 |                      | S1:Dehydration:11.12                                | PEAKS PTM |
| R.EGEQEWGT(-18.01)PGSEVRETSR.N            | Y    | 30.04  | 2143.9407 | 19     | 2.2  | 1072.9800 | 2 | 27.69 | 1        | F1:1293 | OB5939 H1 raw.raw | 4.5095E4        | 1        | 1                   | 147   | 165 |                      | T8:Dehydration:20.70                                | PEAKS PTM |
| K.SFNLDEGHALRIPS.G                        | N    | 29.93  | 1554.7791 | 14     | -4.8 | 778.3931  | 2 | 30.79 | 2        | F2:1515 | OB5940 H1 raw.raw | 5.213E3         | 1        | 1                   | 249   | 262 |                      |                                                     | PEAKS DB  |
| K.HADADNILVIQQGQATVT(-18.01)VANGNNR.K     | N    | 29.88  | 2600.3054 | 25     | -2.7 | 867.7734  | 3 | 30.76 | 3        | F3:1503 | OB5941 H1 raw.raw | 3.2843E5        | 1        | 1                   | 223   | 247 |                      | T18:Dehydration:22.85                               | PEAKS PTM |
| K.NPQLQDLDM(-48.00)MLTC(+57.02)VEIK.E     | N    | 29.75  | 1998.9755 | 17     | -0.6 | 667.3320  | 3 | 34.07 | 2        | F2:1713 | OB5940 H1 raw.raw | 8.006E5         | 1        | 1                   | 415   | 431 | Carbamidomethylation | M9:Detachment:0.00;C13:Carbamidomethylation:1000.00 | PEAKS PTM |
| R.EDWRRPSHQPR.K                           | N    | 29.71  | 1590.7764 | 12     | -0.3 | 398.7013  | 4 | 24.94 | 3        | F3:1169 | OB5941 H1 raw.raw | 1.2481E4        | 1        | 1                   | 128   | 139 |                      |                                                     | PEAKS DB  |
| R.SSDNEGVIVK(+43.01)VSK(+14.02)EHVQELTK.H | N    | 29.63  | 2382.2390 | 21     | 0.9  | 795.0876  | 3 | 28.31 | 3        | F3:1368 | OB5941 H1 raw.raw | 5.0291E4        | 1        | 1                   | 351   | 371 |                      | K10:Carbamylation:5.08;K13:Methylation(KR):5.08     | PEAKS PTM |
| N.NPFYFPSRR.F                             | N    | 29.59  | 1182.5934 | 9      | 1.6  | 395.2057  | 3 | 28.08 | 2        | F2:1358 | OB5940 H1 raw.raw | 2.5271E4        | 1        | 1                   | 167   | 175 |                      |                                                     | PEAKS DB  |
| R.IVQIEARPNTLVLP(+15.99)K.H               | Y    | 29.48  | 1706.0090 | 15     | 1.6  | 854.0131  | 2 | 29.82 | 1        | F1:1418 | OB5939 H1 raw.raw | 0               | 0        | 0                   | 208   | 222 |                      | P14:Hydroxylation Pro:43.89                         | PEAKS DB  |

total 247 peptides

| Peptide                                                             | Uniq | -10lgP | Mass      | Length | ppm  | m/z       | z | RT    | Fraction | Scan    | Source File       | Area raw peanut | #Feature | #Feature raw peanut | Start | End | PTM                                    | AScore                                                                                                                                           | Found By  |
|---------------------------------------------------------------------|------|--------|-----------|--------|------|-----------|---|-------|----------|---------|-------------------|-----------------|----------|---------------------|-------|-----|----------------------------------------|--------------------------------------------------------------------------------------------------------------------------------------------------|-----------|
| K.N(+.98)PQ(+.98)LQ(+.98)DLDMM(+15.99)LTC(+57.02)VEIKEGALMLPHFNSK.A | N    | 29.44  | 3390.5854 | 29     | 3.7  | 848.6568  | 4 | 38.47 | 3        | F3:1982 | OB5941 H1 raw.raw | 0               | 0        | 0                   | 415   | 443 | Deamidation (NQ); Carbamidomethylation | N1:Deamidation (NQ): 62.42; Q3:Deamidation (NQ): 65.92; Q5:Deamidation (NQ): 60.92; M10:Oxidation (M):12.28; C13:Carbamidomethylation:1000.00    | PEAKS DB  |
| K.HADADNILVIQQGQATVTVANGNNR(+14.02)K(+43.99).S                      | N    | 29.12  | 2804.4165 | 26     | -3.2 | 1403.2111 | 2 | 29.38 | 3        | F3:1435 | OB5941 H1 raw.raw | 2.4694E5        | 1        | 1                   | 223   | 248 | Methylation(KR)                        | R25:Methylation(KR): 1000.00; K26:Carboxylation (DKW): 41.02                                                                                     | PEAKS PTM |
| R.EQEW(+15.99)EEEEDEEEEGSNR.E                                       | N    | 29.12  | 2296.8362 | 18     | 4.4  | 1149.4304 | 2 | 27.05 | 1        | F1:1252 | OB5939 H1 raw.raw | 0               | 0        | 0                   | 473   | 490 | Oxidation (HW)                         | W4:Oxidation (HW):1000.00                                                                                                                        | PEAKS PTM |
| K.HADADNILVIQQGQAT(-18.01)VTVANGNNR.K                               | N    | 29.07  | 2600.3054 | 25     | -1.0 | 867.7748  | 3 | 30.11 | 2        | F2:1479 | OB5940 H1 raw.raw | 0               | 0        | 0                   | 223   | 247 |                                        | T16:Dehydration:0.00                                                                                                                             | PEAKS PTM |
| R.E(-18.01)QEWEDEEEDEEEEGSNREVR.R.Y                                 | N    | 28.92  | 2803.1440 | 22     | 2.8  | 935.3912  | 3 | 28.31 | 3        | F3:1363 | OB5941 H1 raw.raw | 2.9497E4        | 1        | 1                   | 473   | 494 | Pyro-glu from E                        | E1:Pyro-glu from E:1000.00                                                                                                                       | PEAKS PTM |
| K.KN(+.98)P(+15.99)Q(+.98)LQ(+.98)DLDMLTC(+57.02)VEIKEGALMLPHFNSK.A | N    | 28.66  | 3518.6804 | 30     | -5.1 | 880.6729  | 4 | 37.59 | 1        | F1:1890 | OB5939 H1 raw.raw | 0               | 0        | 0                   | 414   | 443 | Deamidation (NQ); Carbamidomethylation | N2:Deamidation (NQ): 55.07; P3:Hydroxylation Pro:43.60; Q4:Deamidation (NQ): 57.68; Q6:Deamidation (NQ): 58.78; C14:Carbamidomethylation:1000.00 | PEAKS DB  |

total 247 peptides

| Peptide                                                 | Uniq | -10lgP | Mass      | Length | ppm  | m/z       | z | RT    | Fraction | Scan    | Source File       | Area raw peanut | #Feature | #Feature raw peanut | Start | End | PTM                                  | AScore                                                                             | Found By  |
|---------------------------------------------------------|------|--------|-----------|--------|------|-----------|---|-------|----------|---------|-------------------|-----------------|----------|---------------------|-------|-----|--------------------------------------|------------------------------------------------------------------------------------|-----------|
| K.H(+42.01)(+15.99)ADADNILVIQQGQATVTVAN(+.98)GNNRK.S    | N    | 28.60  | 2805.4006 | 26     | 9.3  | 1403.7207 | 2 | 30.57 | 1        | F1:1450 | OB5939 H1 raw.raw | 9.6068E4        | 1        | 1                   | 223   | 248 | Acetylation (N-term); Oxidation (HW) | H1:Acetylation (N-term):100.00;H1:Oxidation (HW):100.00;N21:Deamidation (NQ):14.04 | PEAKS PTM |
| R.NTLEAAFAFNEIRRVLLEENAGGEQEER.G                        | N    | 28.52  | 3447.6653 | 30     | -1.2 | 1150.2277 | 3 | 38.03 | 2        | F2:1966 | OB5940 H1 raw.raw | 1.3831E5        | 1        | 1                   | 313   | 342 |                                      |                                                                                    | PEAKS DB  |
| R.ESHFVSARPQSQSP(+15.99)SSP(+15.99)EKEDQEEEN.Q          | N    | 28.43  | 2989.2808 | 26     | 0.3  | 997.4344  | 3 | 24.81 | 3        | F3:1156 | OB5941 H1 raw.raw | 0               | 0        | 0                   | 574   | 599 |                                      | P14:Hydroxylation Pro:17.91;P17:Hydroxylation Pro:28.14                            | PEAKS DB  |
| K.NPQLQDLDM(+15.99)LTC(+58.01)VEIK.E                    | N    | 28.36  | 2063.9578 | 17     | -3.4 | 1032.9827 | 2 | 37.19 | 1        | F1:1881 | OB5939 H1 raw.raw | 2.5393E4        | 1        | 1                   | 415   | 431 | Carboxymethyl                        | M10:Oxidation (M):8.69;C13:Carboxymethyl:1000.00                                   | PEAKS PTM |
| K.DLAFPGSGEQVEK(+14.02)LIK(+43.01).N                    | N    | 28.34  | 1786.9464 | 16     | -3.8 | 894.4771  | 2 | 32.91 | 3        | F3:1654 | OB5941 H1 raw.raw | 6.9695E5        | 1        | 1                   | 555   | 570 |                                      | K13:Methylation (KR):4.52;K16:Carbamylation:4.52                                   | PEAKS PTM |
| K.KN(+.98)PQ(+.98)LQDLDMMLTC(+57.02)VEIKEGALMLPHFNSK.A  | N    | 28.34  | 3501.7017 | 30     | 6.9  | 1168.2493 | 3 | 36.92 | 1        | F1:1845 | OB5939 H1 raw.raw | 2.5153E5        | 1        | 1                   | 414   | 443 | Carbamidomethylation                 | N2:Deamidation (NQ):0.00;Q4:Deamidation (NQ):0.00;C14:Carbamidomethylation:1000.00 | PEAKS DB  |
| K.N(+.98)PQLQDLDM(+15.99)MLTC(+57.02)VEIKEGALMLPHFNSK.A | N    | 27.69  | 3388.6174 | 29     | 8.6  | 1130.5562 | 3 | 39.33 | 3        | F3:2085 | OB5941 H1 raw.raw | 8.4125E5        | 1        | 1                   | 415   | 443 | Carbamidomethylation                 | N1:Deamidation (NQ):0.00;M9:Oxidation (M):0.00;C13:Carbamidomethylation:1000.00    | PEAKS DB  |

total 247 peptides

| Peptide                           | Uniq | -10lgP | Mass      | Length | ppm  | m/z      | z | RT    | Fraction | Scan    | Source File       | Area raw peanut | #Feature | #Feature raw peanut | Start | End | PTM | AScore                                                                             | Found By  |
|-----------------------------------|------|--------|-----------|--------|------|----------|---|-------|----------|---------|-------------------|-----------------|----------|---------------------|-------|-----|-----|------------------------------------------------------------------------------------|-----------|
| R.SKQ(+.98)FQN(+.98)LQ(+.98)NHR.I | Y    | 27.06  | 1401.6637 | 11     | 2.0  | 468.2294 | 3 | 24.91 | 1        | F1:1129 | OB5939_H1_raw.raw | 2.0347E3        | 1        | 1                   | 197   | 207 |     | Q3:Deamidation (NQ): 14.04; N6:Deamidation (NQ): 11.06; Q8:Deamidation (NQ): 16.66 | PEAKS DB  |
| K.SFNLD(+53.92)EGHALR.I           | N    | 26.85  | 1311.5294 | 11     | -0.8 | 438.1834 | 3 | 27.41 | 2        | F2:1311 | OB5940_H1_raw.raw | 0               | 0        | 0                   | 249   | 259 |     | D5:Replacement of 2 protons by iron: 20.92                                         | PEAKS PTM |
| total 247 peptides                |      |        |           |        |      |          |   |       |          |         |                   |                 |          |                     |       |     |     |                                                                                    |           |

tr|B3IXL2|B3IXL2\_ARAHY

[back to list](#)

[| Protein Coverage](#) | [Supporting Peptides](#) |

### Protein Coverage:

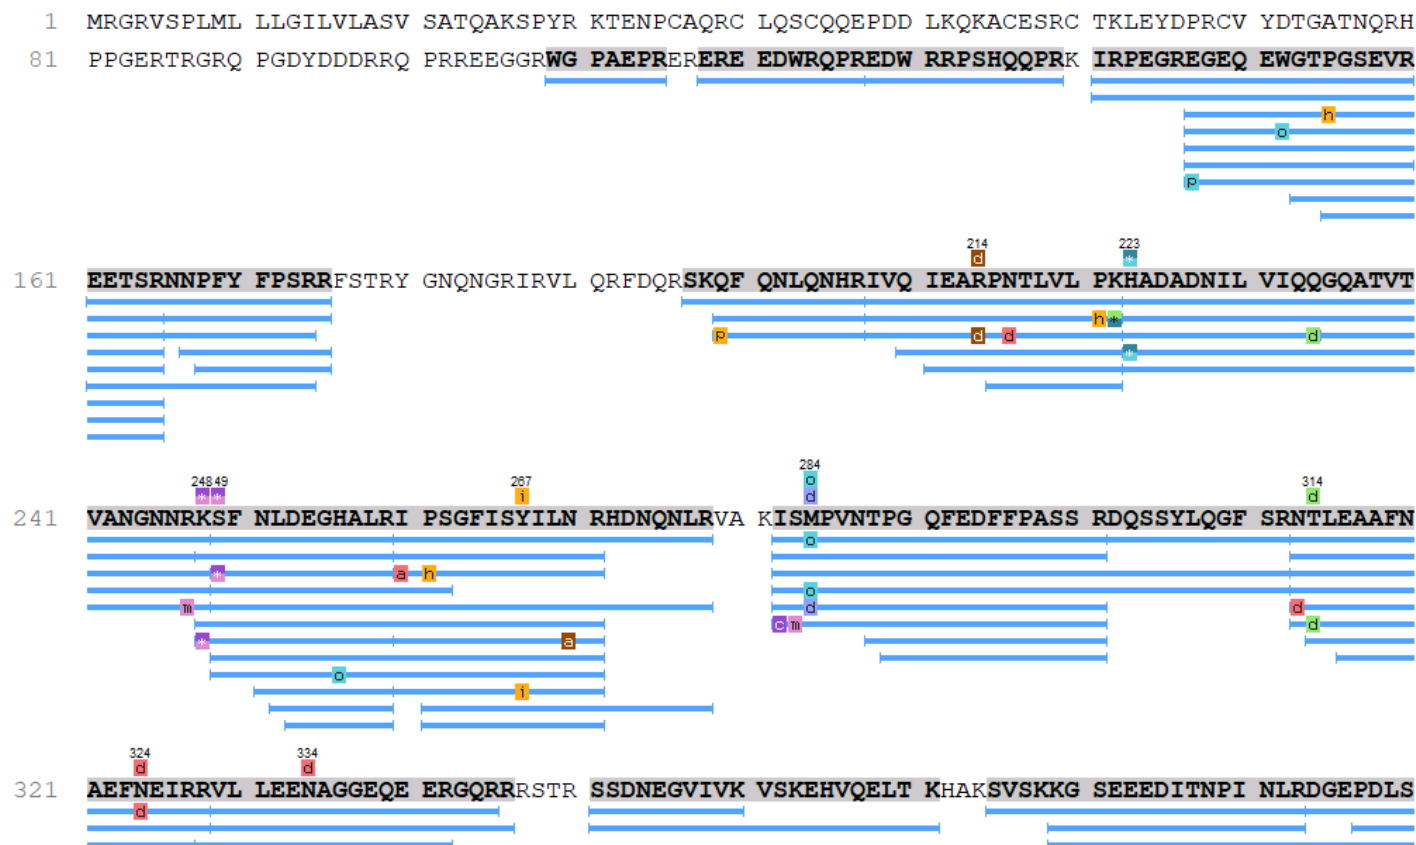

-  Acetylation (K) (+42.01)
-  Amidation of lysines or N-terminal amines with methyl acetimidate (+41.03)
-  Ammonia-loss (N) (-17.03)
-  Carbamidomethylation (+57.02)
-  Carbamylation (+43.01)
-  Carboxymethyl (+58.01)
-  Deamidation (NQ) (+0.98)
-  Dehydration (-18.01)
-  Dimethylation(KR) (+28.03)
-  Deamidation followed by a methylation (+15.00)
-  Dethiomethyl (-48.00)
-  Formylation (+27.99)
-  Hydroxylation Pro (+15.99)
-  Iodination (+125.90)
-  Lysine oxidation to amino adipic semialdehyde (-1.03)
-  Methylation(KR) (+14.02)
-  Methylation(others) (+14.02)
-  Oxidation (M) (+15.99)
-  Oxidation (HW) (+15.99)
-  Pyro-glu from E (-18.01)
-  Pyro-glu from Q (-17.03)
-  Sulphone (+31.99)
-  Acetylation (N-term) (+42.01), Oxidation (HW) (+15.99)
-  Amidation (-0.98), Acetylation (K) (+42.01)
-  Carbamylation (+43.01), Methylation(KR) (+14.02)
-  Carbamylation (+43.01), Methylation(others) (+14.02)
-  Methylation(C-term) (+14.02), Carbamylation (+43.01)

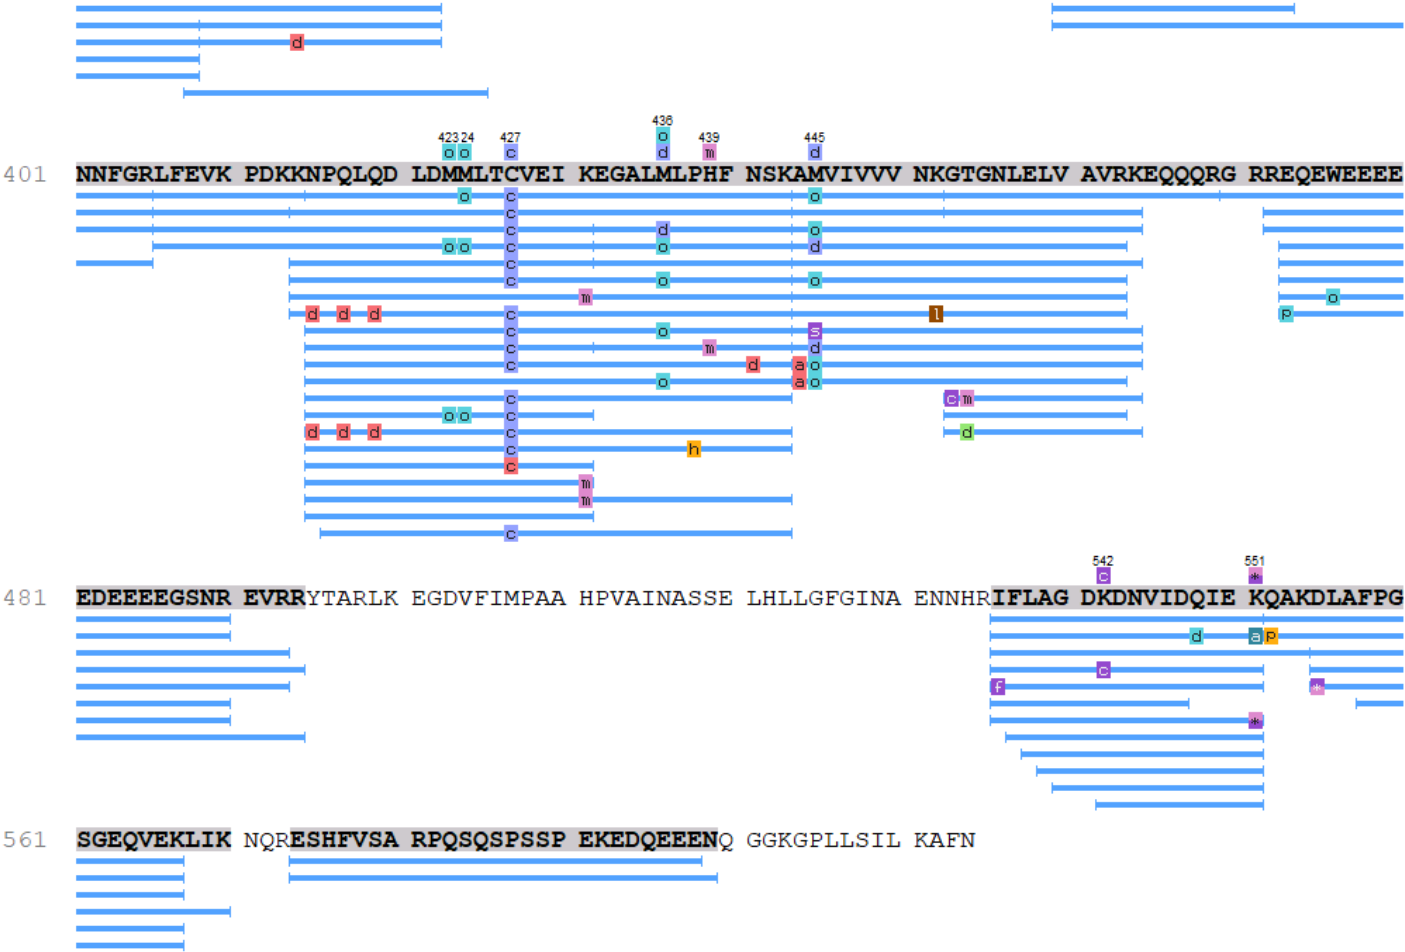

Supporting Peptides:

| Peptide                       | Uniq | -10lgP | Mass      | Length | ppm  | m/z       | z | RT    | Fraction | Scan    | Source File       | Area raw peanut | #Feature | #Feature raw peanut | Start | End | PTM                  | AScore                           | Found By |
|-------------------------------|------|--------|-----------|--------|------|-----------|---|-------|----------|---------|-------------------|-----------------|----------|---------------------|-------|-----|----------------------|----------------------------------|----------|
| K.NPQLQLDMLMTC(+57.02)VEIK.E  | N    | 120.22 | 2046.9788 | 17     | -6.3 | 1024.4902 | 2 | 37.10 | 1        | F1:1864 | OB5939 H1 raw.raw | 1.3638E7        | 5        | 5                   | 415   | 431 | Carbamidomethylation | C13:Carbamidomethylation:1000.00 | PEAKS DB |
| K.KNPQLQLDMLMTC(+57.02)VEIK.E | N    | 118.64 | 2175.0737 | 18     | -1.1 | 1088.5430 | 2 | 34.52 | 2        | F2:1751 | OB5940 H1 raw.raw | 4.131E6         | 3        | 3                   | 414   | 431 | Carbamidomethylation | C14:Carbamidomethylation:1000.00 | PEAKS DB |
| R.EQEWEEEEEEEGSNR.E           | N    | 117.85 | 2280.8413 | 18     | 4.3  | 1141.4329 | 2 | 28.23 | 1        | F1:1323 | OB5939 H1 raw.raw | 4.2916E6        | 3        | 3                   | 473   | 490 |                      |                                  | PEAKS DB |

total 247 peptides

| Peptide                                | Uniq | -10lgP | Mass      | Length | ppm  | m/z       | z | RT    | Fraction | Scan    | Source File       | Area raw peanut | #Feature | #Feature raw peanut | Start | End | PTM                  | AScore                                                  | Found By  |
|----------------------------------------|------|--------|-----------|--------|------|-----------|---|-------|----------|---------|-------------------|-----------------|----------|---------------------|-------|-----|----------------------|---------------------------------------------------------|-----------|
| R.NTLEAAFNAAFNEIR.R                    | N    | 114.83 | 1737.8322 | 15     | -0.4 | 869.9230  | 2 | 34.89 | 2        | F2:1770 | OB5940 H1 raw.raw | 1.3513E7        | 6        | 6                   | 313   | 327 |                      |                                                         | PEAKS DB  |
| K.HADADNILVIQQGQATVTVANGNNRK.S         | N    | 114.12 | 2746.4111 | 26     | 3.2  | 916.4806  | 3 | 29.15 | 1        | F1:1378 | OB5939 H1 raw.raw | 4.7574E7        | 8        | 8                   | 223   | 248 |                      |                                                         | PEAKS DB  |
| K.HADADNILVIQQGQATVTVAN(+.98)GNNRK.S   | N    | 111.24 | 2747.3950 | 26     | 5.5  | 916.8107  | 3 | 29.51 | 1        | F1:1400 | OB5939 H1 raw.raw | 3.8297E8        | 20       | 20                  | 223   | 248 |                      | N21:Deamidation (N Q):26.31                             | PEAKS DB  |
| K.HADADNILVIQQGQATVTVANGNNR.K          | N    | 111.11 | 2618.3162 | 25     | 5.0  | 1310.1719 | 2 | 30.00 | 2        | F2:1473 | OB5940 H1 raw.raw | 6.2545E6        | 3        | 3                   | 223   | 247 |                      |                                                         | PEAKS DB  |
| K.NPQLQDLDM(+15.99)MLTC(+57.02)VEIK.E  | N    | 110.46 | 2062.9736 | 17     | -5.3 | 1032.4886 | 2 | 36.07 | 2        | F2:1840 | OB5940 H1 raw.raw | 3.4606E5        | 2        | 2                   | 415   | 431 | Carbamidomethylation | M9:Oxidation (M):30.46;C13:Carbamidomethylation:1000.00 | PEAKS DB  |
| K.ISM(+15.99)PVNTPGQFEDFFPASSR.D       | N    | 109.22 | 2242.0364 | 20     | -1.8 | 1122.0234 | 2 | 33.79 | 2        | F2:1706 | OB5940 H1 raw.raw | 1.7538E7        | 15       | 15                  | 282   | 301 | Oxidation (M)        | M3:Oxidation (M):1000.00                                | PEAKS DB  |
| K.ISMPVNTPGQFEDFFPASSR.D               | N    | 107.66 | 2226.0415 | 20     | 1.7  | 1114.0299 | 2 | 35.27 | 2        | F2:1792 | OB5940 H1 raw.raw | 2.1717E8        | 29       | 29                  | 282   | 301 |                      |                                                         | PEAKS DB  |
| R.IFLAGDKDNVIDQIEK.Q                   | N    | 103.70 | 1816.9570 | 16     | -1.1 | 909.4848  | 2 | 32.03 | 1        | F1:1588 | OB5939 H1 raw.raw | 7.5151E8        | 30       | 30                  | 536   | 551 |                      |                                                         | PEAKS DB  |
| K.HADADNILVIQQGQATVTVAN(-17.03)GNNRK.S | N    | 99.83  | 2729.3845 | 26     | 0.5  | 1365.7002 | 2 | 28.96 | 2        | F2:1400 | OB5940 H1 raw.raw | 9.5179E6        | 6        | 6                   | 223   | 248 |                      | N21:Ammonia-loss (N):18.53                              | PEAKS PTM |
| R.IFLAGDKDNVIDQIEKQAK.D                | N    | 99.61  | 2144.1477 | 19     | 1.7  | 715.7244  | 3 | 32.37 | 1        | F1:1571 | OB5939 H1 raw.raw | 5.6465E7        | 7        | 7                   | 536   | 554 |                      |                                                         | PEAKS DB  |
| K.AMVIVVVKGTGNLVLAVR.K                 | N    | 99.39  | 2081.2031 | 20     | -3.5 | 694.7392  | 3 | 33.79 | 2        | F2:1711 | OB5940 H1 raw.raw | 6.8972E7        | 9        | 9                   | 444   | 463 |                      |                                                         | PEAKS DB  |
| K.GSEEDITNPINLRDGEPLDLSNNFR.L          | N    | 98.56  | 2887.3220 | 26     | 2.3  | 963.4502  | 3 | 32.73 | 1        | F1:1590 | OB5939 H1 raw.raw | 4.549E7         | 8        | 8                   | 380   | 405 |                      |                                                         | PEAKS DB  |
| K.SFNLDEGHALRIPSGFISYILNR.H            | N    | 98.27  | 2618.3604 | 23     | -1.1 | 873.7931  | 3 | 37.47 | 2        | F2:1880 | OB5940 H1 raw.raw | 1.7034E8        | 24       | 23                  | 249   | 271 |                      |                                                         | PEAKS DB  |
| R.KSFNLDEGHALRIPSGFISYILNR.H           | N    | 97.91  | 2746.4553 | 24     | -2.1 | 916.4905  | 3 | 36.16 | 1        | F1:1802 | OB5939 H1 raw.raw | 8.5492E6        | 5        | 5                   | 248   | 271 |                      |                                                         | PEAKS DB  |
| R.VLLEENAGGEQER.G                      | N    | 97.22  | 1571.7427 | 14     | 2.5  | 786.8806  | 2 | 26.75 | 1        | F1:1224 | OB5939 H1 raw.raw | 1.2414E7        | 3        | 3                   | 329   | 342 |                      |                                                         | PEAKS DB  |
| R.DQSSYLQGFNR.N                        | N    | 97.09  | 1286.5891 | 11     | -3.0 | 644.2999  | 2 | 30.18 | 2        | F2:1484 | OB5940 H1 raw.raw | 6.1544E7        | 13       | 13                  | 302   | 312 |                      |                                                         | PEAKS DB  |
| K.AM(-48.00)VIVVVKGTGNLVLAVR.K         | N    | 96.95  | 2033.1997 | 20     | 1.4  | 678.7415  | 3 | 30.71 | 2        | F2:1519 | OB5940 H1 raw.raw | 1.7497E7        | 6        | 6                   | 444   | 463 | Dethiomethyl         | M2:Detachment:1000.00                                   | PEAKS PTM |

total 247 peptides

| Peptide                                   | Uniq | -10lgP | Mass      | Length | ppm  | m/z       | z | RT    | Fraction | Scan    | Source File       | Area raw peanut | #Feature | #Feature raw peanut | Start | End | PTM                  | AScore                                                         | Found By  |
|-------------------------------------------|------|--------|-----------|--------|------|-----------|---|-------|----------|---------|-------------------|-----------------|----------|---------------------|-------|-----|----------------------|----------------------------------------------------------------|-----------|
| K.SFNLDEGHALR.I                           | N    | 96.68  | 1257.6101 | 11     | 1.8  | 629.8135  | 2 | 27.87 | 1        | F1:1301 | OB5939 H1 raw.raw | 7.3788E7        | 15       | 15                  | 249   | 259 |                      |                                                                | PEAKS DB  |
| K.AMVIVVVKGTGNLELVAVRK.E                  | N    | 96.39  | 2209.2981 | 21     | -2.2 | 737.4384  | 3 | 31.97 | 2        | F2:1628 | OB5940 H1 raw.raw | 2.8068E8        | 12       | 12                  | 444   | 464 |                      |                                                                | PEAKS DB  |
| K.AM(+15.99)VIVVVKGTGNLELVAVR.K           | N    | 95.84  | 2097.1980 | 20     | -2.2 | 1049.6040 | 2 | 32.73 | 3        | F3:1638 | OB5941 H1 raw.raw | 3.1624E7        | 6        | 6                   | 444   | 463 | Oxidation (M)        | M2:Oxidation (M):10 00.00                                      | PEAKS DB  |
| R.IPSGFISYILNR.H                          | N    | 93.86  | 1378.7609 | 12     | 1.2  | 690.3885  | 2 | 36.74 | 2        | F2:1881 | OB5940 H1 raw.raw | 1.7713E8        | 5        | 5                   | 260   | 271 |                      |                                                                | PEAKS DB  |
| R.RVLEENAGGEQEER.G                        | N    | 93.51  | 1727.8438 | 15     | 0.4  | 576.9554  | 3 | 24.77 | 2        | F2:1156 | OB5940 H1 raw.raw | 1.346E5         | 5        | 5                   | 328   | 342 |                      |                                                                | PEAKS DB  |
| K.NPQLQLDMMMLTC(+57.02)VEIKEGALMLPHFNSK.A | N    | 92.80  | 3371.6387 | 29     | -2.9 | 1686.8218 | 2 | 37.92 | 1        | F1:1910 | OB5939 H1 raw.raw | 1.8404E8        | 11       | 11                  | 415   | 443 | Carbamidomethylation | C13:Carbamidomethylation:1 000.00                              | PEAKS DB  |
| R.KSFNLDEGHALR.I                          | N    | 89.31  | 1385.7051 | 12     | 1.9  | 693.8611  | 2 | 25.26 | 2        | F2:1181 | OB5940 H1 raw.raw | 3.3181E6        | 6        | 6                   | 248   | 259 |                      |                                                                | PEAKS DB  |
| K.KGSEEEITNPINLRDGEPLDLSNNFGR.L           | N    | 89.20  | 3015.4170 | 27     | -0.8 | 1006.1455 | 3 | 31.46 | 1        | F1:1545 | OB5939 H1 raw.raw | 7.9044E7        | 10       | 10                  | 379   | 405 |                      |                                                                | PEAKS DB  |
| K.NPQLQLDMMMLTC(+14.02)VEIK.E             | N    | 88.98  | 2003.9730 | 17     | -4.9 | 1002.9888 | 2 | 37.72 | 2        | F2:1938 | OB5940 H1 raw.raw | 6.7012E5        | 2        | 2                   | 415   | 431 |                      | C13:Methylation(oths):33.9 8                                   | PEAKS PTM |
| R.NTLEAAFNAEFNEIRR.V                      | N    | 86.44  | 1893.9332 | 16     | -3.6 | 947.9705  | 2 | 35.28 | 1        | F1:1741 | OB5939 H1 raw.raw | 3.2153E8        | 22       | 22                  | 313   | 328 |                      |                                                                | PEAKS DB  |
| K.HADADNILVIQQGQATVTVANGN(-17.03)NRK.S    | N    | 85.41  | 2729.3845 | 26     | -3.3 | 1365.6951 | 2 | 29.38 | 3        | F3:1432 | OB5941 H1 raw.raw | 2.4846E6        | 2        | 2                   | 223   | 248 |                      | N23:Ammonia-loss (N):0.0 0                                     | PEAKS PTM |
| K.DLAFIGSGEQVEK.L                         | N    | 85.12  | 1375.6619 | 13     | 1.9  | 688.8395  | 2 | 29.66 | 2        | F2:1451 | OB5940 H1 raw.raw | 6.5078E7        | 3        | 3                   | 555   | 567 |                      |                                                                | PEAKS DB  |
| K.NPQLQLDMM(-48.00)LTC(+57.02)VEIK.E      | N    | 85.01  | 1998.9755 | 17     | 0.5  | 1000.4955 | 2 | 32.73 | 1        | F1:1599 | OB5939 H1 raw.raw | 1.7365E7        | 6        | 6                   | 415   | 431 | Carbamidomethylation | M10:De thiomethyl:27. 96;C1 3:Carb amido methyl ation:1 000.00 | PEAKS PTM |
| R.VLLEENAGGEQEERGQR.R                     | N    | 84.92  | 1912.9238 | 17     | 1.8  | 957.4709  | 2 | 25.31 | 3        | F3:1182 | OB5941 H1 raw.raw | 1.9929E6        | 6        | 6                   | 329   | 345 |                      |                                                                | PEAKS DB  |
| R.SSDNEGIVVKVSKHEVQELTK.H                 | N    | 84.86  | 2325.2175 | 21     | 1.3  | 776.0808  | 3 | 28.31 | 3        | F3:1362 | OB5941 H1 raw.raw | 1.2881E5        | 2        | 2                   | 351   | 371 |                      |                                                                | PEAKS DB  |
| K.KGSEEEITNPINLR.D                        | N    | 84.79  | 1713.8533 | 15     | 3.6  | 857.9370  | 2 | 28.42 | 2        | F2:1374 | OB5940 H1 raw.raw | 1.1329E7        | 7        | 7                   | 379   | 393 |                      |                                                                | PEAKS DB  |

total 247 peptides

| Peptide                                           | Uniq | -10lgP | Mass      | Length | ppm  | m/z       | z | RT    | Fraction | Scan    | Source File       | Area raw peanut | #Feature | #Feature raw peanut | Start | End | PTM                  | AScore                                                   | Found By  |
|---------------------------------------------------|------|--------|-----------|--------|------|-----------|---|-------|----------|---------|-------------------|-----------------|----------|---------------------|-------|-----|----------------------|----------------------------------------------------------|-----------|
| K.KNPQLQDLDM(+15.99)LTC(+57.02)VEIKEGALMLPHFNSK.A | N    | 84.57  | 3515.7285 | 30     | -2.7 | 879.9370  | 4 | 34.52 | 2        | F2:1755 | OB5940 H1 raw.raw | 2.6704E6        | 3        | 3                   | 414   | 443 | Carbamidomethylation | M11:Oxidation (M):30.46;C14:Carbamidomethylation:1000.00 | PEAKS DB  |
| R.DGEPDLSNNFR.L                                   | N    | 84.53  | 1319.5742 | 12     | 0.4  | 660.7947  | 2 | 29.14 | 1        | F1:1381 | OB5939 H1 raw.raw | 3.3217E6        | 3        | 3                   | 394   | 405 |                      |                                                          | PEAKS DB  |
| K.AM(+15.99)VIVVVNKG TGNLELVAVRK.E                | N    | 83.52  | 2225.2930 | 21     | -2.3 | 1113.6512 | 2 | 31.28 | 1        | F1:1523 | OB5939 H1 raw.raw | 4.3919E7        | 8        | 8                   | 444   | 464 | Oxidation (M)        | M2:Oxidation (M):1000.00                                 | PEAKS DB  |
| R.EGEQEWGTPGSEVRETSR.N                            | Y    | 82.53  | 2161.9512 | 19     | 4.3  | 1081.9875 | 2 | 27.69 | 1        | F1:1291 | OB5939 H1 raw.raw | 2.0963E7        | 6        | 6                   | 147   | 165 |                      |                                                          | PEAKS DB  |
| K.HADADNILVIQQGQATVTVAN(+.98)GNNR.K               | N    | 82.15  | 2619.3000 | 25     | -1.2 | 1310.6558 | 2 | 30.35 | 2        | F2:1535 | OB5940 H1 raw.raw | 5.2956E6        | 1        | 1                   | 223   | 247 |                      | N21:Deamidation (N Q):7.32                               | PEAKS DB  |
| R.EGEQEWGTPGSEVR.E                                | Y    | 81.97  | 1559.6852 | 14     | 1.4  | 780.8510  | 2 | 27.35 | 2        | F2:1310 | OB5940 H1 raw.raw | 8.022E5         | 3        | 3                   | 147   | 160 |                      |                                                          | PEAKS DB  |
| K.KNPQLQDLDM(+15.99)LTC(+57.02)VEIK.E             | N    | 81.97  | 2191.0686 | 18     | 0.5  | 1096.5421 | 2 | 32.43 | 2        | F2:1621 | OB5940 H1 raw.raw | 1.9806E5        | 1        | 1                   | 414   | 431 | Carbamidomethylation | M11:Oxidation (M):9.34;C14:Carbamidomethylation:1000.00  | PEAKS DB  |
| K.EGALMLPHFNSK.A                                  | N    | 81.44  | 1342.6703 | 12     | 4.0  | 672.3451  | 2 | 30.40 | 1        | F1:1456 | OB5939 H1 raw.raw | 9.7706E6        | 3        | 3                   | 432   | 443 |                      |                                                          | PEAKS DB  |
| K.QAKDLAFPGSGEQVEK.L                              | N    | 81.31  | 1702.8525 | 16     | 1.8  | 852.4351  | 2 | 26.85 | 3        | F3:1278 | OB5941 H1 raw.raw | 1.3516E6        | 7        | 7                   | 552   | 567 |                      |                                                          | PEAKS DB  |
| K.GSEEDITNPINLR.D                                 | N    | 80.86  | 1585.7583 | 14     | 2.4  | 793.8883  | 2 | 30.52 | 2        | F2:1506 | OB5940 H1 raw.raw | 3.0736E6        | 3        | 3                   | 380   | 393 |                      |                                                          | PEAKS DB  |
| K.H(+43.01)(+14.02)ADADNILVIQQGQATVTVANGNRRK.S    | N    | 80.77  | 2803.4324 | 26     | -1.3 | 935.4835  | 3 | 29.92 | 3        | F3:1452 | OB5941 H1 raw.raw | 2.1221E6        | 2        | 2                   | 223   | 248 |                      | H1:Carbamylation:252.86;H1:Methylation (others):25.66    | PEAKS PTM |
| K.AMVIVVVNK.G                                     | N    | 78.49  | 971.5837  | 9      | 0.9  | 486.7996  | 2 | 29.32 | 2        | F2:1448 | OB5940 H1 raw.raw | 9.4803E6        | 3        | 3                   | 444   | 452 |                      |                                                          | PEAKS DB  |
| F.LAGDKDNVIDQIEK.Q                                | N    | 78.09  | 1556.8046 | 14     | -6.1 | 779.4048  | 2 | 31.62 | 2        | F2:1564 | OB5940 H1 raw.raw | 4.6126E6        | 2        | 2                   | 538   | 551 |                      |                                                          | PEAKS DB  |

total 247 peptides



| Peptide                                            | Uniq | -10lgP | Mass      | Length | ppm  | m/z       | z | RT    | Fraction | Scan    | Source File       | Area raw peanut | #Feature | #Feature raw peanut | Start | End | PTM                                 | AScore                                                    | Found By |
|----------------------------------------------------|------|--------|-----------|--------|------|-----------|---|-------|----------|---------|-------------------|-----------------|----------|---------------------|-------|-----|-------------------------------------|-----------------------------------------------------------|----------|
| K.KNPQLQDLDM(+15.99)MLTC(+57.02)VEIK.E             | N    | 77.76  | 2191.0686 | 18     | 0.6  | 1096.5422 | 2 | 33.03 | 1        | F1:1615 | OB5939 H1 raw.raw | 0               | 0        | 0                   | 414   | 431 | Carbamidomethylation                | M10:Oxidation (M):14.02;C14:Carbamidomethylation:1000.00  | PEAKS DB |
| R.IPSGFISYILNRHDNQNL.R                             | N    | 77.66  | 2256.1763 | 19     | 3.4  | 1129.0992 | 2 | 33.47 | 1        | F1:1643 | OB5939 H1 raw.raw | 3.1228E8        | 24       | 24                  | 260   | 278 |                                     |                                                           | PEAKS DB |
| R.GRREQEWEEEEEEEEGSNR.E                            | N    | 77.42  | 2650.0649 | 21     | 0.3  | 884.3625  | 3 | 25.64 | 2        | F2:1205 | OB5940 H1 raw.raw | 2.3251E6        | 7        | 7                   | 470   | 490 |                                     |                                                           | PEAKS DB |
| K.NPQLQDLDM(+15.99)MLTC(+57.02)VEIKEGALMLPHFNSK.A  | N    | 75.51  | 3387.6335 | 29     | -1.5 | 1130.2168 | 3 | 36.17 | 3        | F3:1926 | OB5941 H1 raw.raw | 2.5418E7        | 3        | 3                   | 415   | 443 | Carbamidomethylation                | M9:Oxidation (M):10.11;C13:Carbamidomethylation:1000.00   | PEAKS DB |
| K.EGALM(+15.99)LPHFNSK.A                           | N    | 74.93  | 1358.6653 | 12     | 2.1  | 680.3414  | 2 | 29.74 | 3        | F3:1443 | OB5941 H1 raw.raw | 2.0704E6        | 3        | 3                   | 432   | 443 | Oxidation (M)                       | M5:Oxidation (M):1000.00                                  | PEAKS DB |
| R.LFEVKPKDKNPQLQDLDMMLTC(+57.02)VEIK.E             | N    | 74.78  | 3131.6069 | 26     | 3.7  | 1044.8801 | 3 | 33.97 | 2        | F2:1716 | OB5940 H1 raw.raw | 3.7773E6        | 3        | 3                   | 406   | 431 | Carbamidomethylation                | C22:Carbamidomethylation:1000.00                          | PEAKS DB |
| K.KNPQLQDLDMMLTC(+57.02)VEIKEGALM(+15.99)LPHFNSK.A | N    | 74.26  | 3515.7285 | 30     | -0.8 | 879.9387  | 4 | 35.84 | 1        | F1:1790 | OB5939 H1 raw.raw | 5.1448E6        | 2        | 2                   | 414   | 443 | Carbamidomethylation; Oxidation (M) | C14:Carbamidomethylation:1000.00; M23:Oxidation (M):69.38 | PEAKS DB |
| K.HADADNILVIQQGQATVTVANGNN(+.98)RK.S               | N    | 73.98  | 2747.3950 | 26     | 1.9  | 916.8074  | 3 | 39.56 | 2        | F2:2095 | OB5940 H1 raw.raw | 5.4145E5        | 4        | 4                   | 223   | 248 |                                     | N24:Deamidation (N Q):14.02                               | PEAKS DB |
| K.GTGNLELVAVRK.E                                   | N    | 73.67  | 1255.7249 | 12     | 0.9  | 628.8702  | 2 | 26.85 | 3        | F3:1263 | OB5941 H1 raw.raw | 1.0553E7        | 7        | 7                   | 453   | 464 |                                     |                                                           | PEAKS DB |
| K.NPQLQDLDM(+15.99)LTC(+57.02)VEIKEGALMLPHFNSK.A   | N    | 72.71  | 3387.6335 | 29     | 3.8  | 1130.2228 | 3 | 37.84 | 2        | F2:1902 | OB5940 H1 raw.raw | 8.789E6         | 3        | 3                   | 415   | 443 | Carbamidomethylation                | M10:Oxidation (M):14.02;C13:Carbamidomethylation:1000.00  | PEAKS DB |
| K.GTGNLELVAVR.K                                    | N    | 71.83  | 1127.6299 | 11     | 0.2  | 564.8223  | 2 | 29.32 | 2        | F2:1429 | OB5940 H1 raw.raw | 1.0095E7        | 3        | 3                   | 453   | 463 |                                     |                                                           | PEAKS DB |
| R.NNPFYFPSR.R                                      | N    | 71.25  | 1140.5352 | 9      | 0.9  | 571.2754  | 2 | 30.89 | 2        | F2:1528 | OB5940 H1 raw.raw | 1.2382E7        | 4        | 4                   | 166   | 174 |                                     |                                                           | PEAKS DB |

total 247 peptides

| Peptide                                            | Uniq | -10lgP | Mass      | Length | ppm  | m/z       | z | RT    | Fraction | Scan    | Source File       | Area raw peanut | #Feature | #Feature raw peanut | Start | End | PTM                                 | AScore                                                    | Found By  |
|----------------------------------------------------|------|--------|-----------|--------|------|-----------|---|-------|----------|---------|-------------------|-----------------|----------|---------------------|-------|-----|-------------------------------------|-----------------------------------------------------------|-----------|
| R.VLLEENAGGEQERGR.R                                | N    | 71.19  | 2069.0249 | 18     | 2.1  | 690.6837  | 3 | 25.31 | 3        | F3:1186 | OB5941 H1 raw.raw | 1.1654E6        | 2        | 2                   | 329   | 346 |                                     |                                                           | PEAKS DB  |
| I.PSGFISYILNR.H                                    | N    | 70.27  | 1265.6768 | 11     | 2.4  | 633.8472  | 2 | 36.17 | 2        | F2:1844 | OB5940 H1 raw.raw | 2.1876E5        | 2        | 2                   | 261   | 271 |                                     |                                                           | PEAKS DB  |
| R.EETSRNNPFYFSPRR.F                                | N    | 69.88  | 1898.9023 | 15     | 1.2  | 633.9755  | 3 | 27.17 | 2        | F2:1289 | OB5940 H1 raw.raw | 7.2799E6        | 5        | 5                   | 161   | 175 |                                     |                                                           | PEAKS DB  |
| K.NPQLQDLDMMLTC(+57.02)VEIKEGALM(+15.99)LPHFNSK.A  | N    | 69.58  | 3387.6335 | 29     | -9.3 | 1130.2080 | 3 | 36.62 | 2        | F2:1874 | OB5940 H1 raw.raw | 2.6984E7        | 4        | 4                   | 415   | 443 | Carbamidomethylation; Oxidation (M) | C13:Carbamidomethylation:1000.00; M22:Oxidation (M):69.89 | PEAKS DB  |
| K.ISMPVNTPGQ(+.98)FEDFFPASSR.D                     | N    | 68.89  | 2227.0254 | 20     | 6.4  | 1114.5271 | 2 | 63.55 | 3        | F3:3427 | OB5941 H1 raw.raw | 9.613E3         | 2        | 2                   | 282   | 301 |                                     | Q10:Deamidation (N Q):33.26                               | PEAKS DB  |
| R.REQEWEHEHEHEHEGSRN.E                             | N    | 68.88  | 2436.9424 | 19     | 2.8  | 1219.4819 | 2 | 26.47 | 3        | F3:1258 | OB5941 H1 raw.raw | 3.0427E4        | 2        | 2                   | 472   | 490 |                                     |                                                           | PEAKS DB  |
| R.IPSGFISY(+125.90)ILNR.H                          | N    | 68.75  | 1504.6575 | 12     | 1.5  | 753.3372  | 2 | 37.84 | 2        | F2:1946 | OB5940 H1 raw.raw | 9.8548E5        | 2        | 2                   | 260   | 271 | Iodination                          | Y8:Iodination:1000.00                                     | PEAKS PTM |
| R.NTLEAAFNAEFN(+.98)EIRR.V                         | N    | 68.73  | 1894.9172 | 16     | -3.7 | 948.4624  | 2 | 32.73 | 3        | F3:1640 | OB5941 H1 raw.raw | 4.5098E6        | 3        | 3                   | 313   | 328 | Deamidation (NQ)                    | N12:Deamidation (N Q):55.21                               | PEAKS DB  |
| R.N(+.98)TLEAAFNAEFNEIRR.V                         | N    | 67.69  | 1894.9172 | 16     | 2.2  | 948.4680  | 2 | 35.88 | 1        | F1:1787 | OB5939 H1 raw.raw | 6.2604E7        | 1        | 1                   | 313   | 328 | Deamidation (NQ)                    | N1:Deamidation (NQ):61.82                                 | PEAKS DB  |
| R.NNPFYFSPRR.F                                     | N    | 67.53  | 1296.6364 | 10     | 1.5  | 649.3264  | 2 | 28.95 | 1        | F1:1356 | OB5939 H1 raw.raw | 1.2601E8        | 9        | 9                   | 166   | 175 |                                     |                                                           | PEAKS DB  |
| K.KNPQLQDLDM(+15.99)MLTC(+57.02)VEIKEGALMLPHFNSK.A | N    | 66.89  | 3515.7285 | 30     | -3.1 | 879.9366  | 4 | 35.44 | 2        | F2:1830 | OB5940 H1 raw.raw | 7.3362E6        | 2        | 2                   | 414   | 443 | Carbamidomethylation                | M10:Oxidation (M):11.06; C14:Carbamidomethylation:1000.00 | PEAKS DB  |
| K.HADADNILVIQQQATVTVANGN(+.98)NRK.S                | N    | 66.81  | 2747.3950 | 26     | 3.3  | 916.8087  | 3 | 44.43 | 3        | F3:2322 | OB5941 H1 raw.raw | 2.5002E7        | 10       | 10                  | 223   | 248 |                                     | N23:Deamidation (N Q):17.01                               | PEAKS DB  |
| K.KNPQLQDLDMMLTC(+57.02)VEIKEGALMLPHFNSK.A         | N    | 66.20  | 3499.7336 | 30     | -0.1 | 875.9406  | 4 | 36.52 | 3        | F3:1868 | OB5941 H1 raw.raw | 1.1425E7        | 3        | 3                   | 414   | 443 | Carbamidomethylation                | C14:Carbamidomethylation:1000.00                          | PEAKS DB  |

total 247 peptides

| Peptide                                    | Uniq | -10lgP | Mass      | Length | ppm  | m/z       | z | RT    | Fraction | Scan    | Source File       | Area raw peanut | #Feature | #Feature raw peanut | Start | End | PTM                                | AScore                                                | Found By  |
|--------------------------------------------|------|--------|-----------|--------|------|-----------|---|-------|----------|---------|-------------------|-----------------|----------|---------------------|-------|-----|------------------------------------|-------------------------------------------------------|-----------|
| K.HADADNILVIQQGQ(+.98)ATVTVANGNNRK.S       | N    | 66.16  | 2747.3950 | 26     | 5.1  | 916.8103  | 3 | 44.47 | 1        | F1:2283 | OB5939 H1 raw.raw | 5.1832E5        | 2        | 2                   | 223   | 248 |                                    | Q14:Deamidation (NQ):17.37                            | PEAKS DB  |
| K.SVSKKGSEEDITNPINLR.D                     | N    | 66.11  | 2115.0808 | 19     | 2.6  | 706.0361  | 3 | 27.22 | 3        | F3:1299 | OB5941 H1 raw.raw | 6.5352E4        | 2        | 2                   | 375   | 393 |                                    |                                                       | PEAKS DB  |
| R.VLLEEN(+.98)AGGEQEER.G                   | N    | 66.02  | 1572.7267 | 14     | -3.7 | 787.3677  | 2 | 26.82 | 2        | F2:1276 | OB5940 H1 raw.raw | 0               | 0        | 0                   | 329   | 342 | Deamidation (NQ)                   | N6:Deamidation (NQ):71.64                             | PEAKS DB  |
| R.IVQIEARPNTLVLPK.H                        | Y    | 65.77  | 1690.0140 | 15     | -3.0 | 846.0117  | 2 | 30.24 | 3        | F3:1474 | OB5941 H1 raw.raw | 2.8055E8        | 18       | 18                  | 208   | 222 |                                    |                                                       | PEAKS DB  |
| R.EGEQEWGTP(+15.99)GSEVRETSR.N             | Y    | 65.62  | 2177.9460 | 19     | 1.3  | 726.9902  | 3 | 26.28 | 3        | F3:1241 | OB5941 H1 raw.raw | 4.9462E6        | 6        | 6                   | 147   | 165 | Hydroxylation Pro                  | P9:Hydroxylation Pro:1000.00                          | PEAKS DB  |
| K.Q(-17.03)FQNLQNHR.I                      | N    | 65.38  | 1166.5581 | 9      | 2.4  | 584.2877  | 2 | 28.05 | 1        | F1:1306 | OB5939 H1 raw.raw | 3.4214E6        | 3        | 3                   | 199   | 207 | Pyro-glu from Q                    | Q1:Pyro-glu from Q:1000.00                            | PEAKS PTM |
| K.NPQLQLDMMMLTCVEIK(+14.02)EGALMLPHFNSK.A  | N    | 64.78  | 3328.6328 | 29     | 1.8  | 1110.5536 | 3 | 38.03 | 2        | F2:1959 | OB5940 H1 raw.raw | 1.6164E7        | 6        | 6                   | 415   | 443 | Methylation(KR)                    | K17:Methylation(KR):77.78                             | PEAKS PTM |
| I.FLAGDKDNVIDQIEK.Q                        | N    | 64.24  | 1703.8729 | 15     | -1.7 | 852.9423  | 2 | 32.19 | 1        | F1:1574 | OB5939 H1 raw.raw | 1.36E6          | 3        | 3                   | 537   | 551 |                                    |                                                       | PEAKS DB  |
| R.EETSRNPNFYFSPSR.R                        | N    | 63.62  | 1742.8011 | 14     | -0.9 | 581.9405  | 3 | 29.89 | 1        | F1:1419 | OB5939 H1 raw.raw | 6.2933E4        | 1        | 1                   | 161   | 174 |                                    |                                                       | PEAKS DB  |
| R.I(+27.99)FLAGDKDNVIDQIEK.Q               | N    | 63.40  | 1844.9519 | 16     | 5.2  | 923.4880  | 2 | 36.16 | 3        | F3:1844 | OB5941 H1 raw.raw | 0               | 0        | 0                   | 536   | 551 | Formylation                        | I1:Formylation:77.93                                  | PEAKS PTM |
| L.AGDKDNVIDQIEK.Q                          | N    | 63.17  | 1443.7205 | 13     | -3.1 | 722.8653  | 2 | 32.19 | 1        | F1:1560 | OB5939 H1 raw.raw | 9.2796E5        | 2        | 2                   | 539   | 551 |                                    |                                                       | PEAKS DB  |
| K.I(+43.01)S(+14.02)MPVNTPGQFEDFFPASSR.D   | N    | 62.82  | 2283.0630 | 20     | -0.1 | 1142.5387 | 2 | 35.84 | 1        | F1:1793 | OB5939 H1 raw.raw | 7.6784E5        | 1        | 1                   | 282   | 301 | Carbamylation; Methylation(others) | I1:Carbamylation:100.00;S2:Methylation(others):86.16  | PEAKS PTM |
| R.IPSGFISYILN(-17.03)R.H                   | N    | 62.55  | 1361.7343 | 12     | 1.4  | 681.8754  | 2 | 37.47 | 2        | F2:1926 | OB5940 H1 raw.raw | 5.558E5         | 2        | 2                   | 260   | 271 | Ammonia-loss (N)                   | N11:Ammonia-loss (N):100.00                           | PEAKS PTM |
| K.HADADNILVIQQGQ(+.98)ATVTVAN(+.98)GNNRK.S | N    | 62.38  | 2748.3792 | 26     | 2.7  | 917.1361  | 3 | 32.55 | 3        | F3:1635 | OB5941 H1 raw.raw | 5.5427E5        | 2        | 2                   | 223   | 248 |                                    | Q14:Deamidation (NQ):32.28;N21:Deamidation (NQ):14.04 | PEAKS DB  |

total 247 peptides

| Peptide                                                   | Uniq | -10lgP | Mass      | Length | ppm  | m/z       | z | RT    | Fraction | Scan    | Source File       | Area raw peanut | #Feature | #Feature raw peanut | Start | End | PTM                                 | AScore                                                                            | Found By |
|-----------------------------------------------------------|------|--------|-----------|--------|------|-----------|---|-------|----------|---------|-------------------|-----------------|----------|---------------------|-------|-----|-------------------------------------|-----------------------------------------------------------------------------------|----------|
| R.SSDNEGVIVK.V                                            | N    | 62.38  | 1046.5244 | 10     | 0.3  | 524.2697  | 2 | 22.95 | 2        | F2:1057 | OB5940 H1 raw.raw | 2.5465E5        | 3        | 3                   | 351   | 360 |                                     |                                                                                   | PEAKS DB |
| K.AM(+15.99)VIVVVNK.G                                     | N    | 62.22  | 987.5787  | 9      | 0.3  | 494.7968  | 2 | 26.41 | 2        | F2:1234 | OB5940 H1 raw.raw | 8.6851E5        | 3        | 3                   | 444   | 452 | Oxidation (M)                       | M2:Oxidation (M):10.00.00                                                         | PEAKS DB |
| A.GDKDNVIDQIEK.Q                                          | N    | 62.19  | 1372.6833 | 12     | -2.8 | 687.3470  | 2 | 32.19 | 1        | F1:1561 | OB5939 H1 raw.raw | 1.5319E6        | 3        | 3                   | 540   | 551 |                                     |                                                                                   | PEAKS DB |
| F.NLDEGHALR.I                                             | N    | 62.08  | 1023.5097 | 9      | 1.8  | 512.7631  | 2 | 27.87 | 1        | F1:1303 | OB5939 H1 raw.raw | 1.5945E6        | 3        | 3                   | 251   | 259 |                                     |                                                                                   | PEAKS DB |
| Q.GQATVTVAN(+.98)GNNRK.S                                  | N    | 62.04  | 1429.7273 | 14     | -1.0 | 715.8702  | 2 | 28.79 | 2        | F2:1402 | OB5940 H1 raw.raw | 6.6423E5        | 3        | 3                   | 235   | 248 |                                     | N9:Deamidation (NQ):41.83                                                         | PEAKS DB |
| A.FPGSGEQVEK.L                                            | N    | 61.40  | 1076.5138 | 10     | 5.5  | 539.2672  | 2 | 30.23 | 1        | F1:1449 | OB5939 H1 raw.raw | 6.3559E4        | 1        | 1                   | 558   | 567 |                                     |                                                                                   | PEAKS DB |
| K.HADADNILVIQ(+.98)Q(+.98)GQATVTVAN(+.98)GNNRK.S          | N    | 60.41  | 2749.3630 | 26     | 9.6  | 917.4704  | 3 | 30.18 | 2        | F2:1540 | OB5940 H1 raw.raw | 4.3875E6        | 1        | 1                   | 223   | 248 |                                     | Q11:Deamidation (NQ):26.52;Q12:Deamidation (NQ):18.53;N21:Deamidation (NQ):14.04  | PEAKS DB |
| K.SFNLDEGHALRIPSGFISYILNRHDNQNL.R.V                       | N    | 60.12  | 3495.7759 | 30     | -1.0 | 700.1617  | 5 | 36.35 | 2        | F2:1862 | OB5940 H1 raw.raw | 7.0033E7        | 8        | 8                   | 249   | 278 |                                     |                                                                                   | PEAKS DB |
| K.NPQLQ(+.98)DLDMMLTC(+57.02)VEIKEGALM(+15.99)LPHFNSK.A   | N    | 60.12  | 3388.6174 | 29     | -2.4 | 1130.5437 | 3 | 36.35 | 2        | F2:1874 | OB5940 H1 raw.raw | 6.4476E5        | 1        | 1                   | 415   | 443 | Carbamidomethylation; Oxidation (M) | Q5:Deamidation (NQ):9.86;C13:Carbamidomethylation:1000.00;M22:Oxidation (M):54.40 | PEAKS DB |
| K.NPQLQDLDM(+15.99)M(+15.99)LTC(+57.02)VEIKEGALMLPHFNSK.A | N    | 60.05  | 3403.6284 | 29     | -4.3 | 1135.5452 | 3 | 35.63 | 3        | F3:1818 | OB5941 H1 raw.raw | 7.9921E5        | 1        | 1                   | 415   | 443 | Oxidation (M); Carbamidomethylation | M9:Oxidation (M):49.25;M10:Oxidation (M):53.09;C13:Carbamidomethylation:1000.00   | PEAKS DB |

total 247 peptides

| Peptide                                          | Uniq | -10lgP | Mass      | Length | ppm  | m/z       | z | RT    | Fraction | Scan    | Source File       | Area raw peanut | #Feature | #Feature raw peanut | Start | End | PTM                                                                                    | AScore                                                                                                       | Found By  |
|--------------------------------------------------|------|--------|-----------|--------|------|-----------|---|-------|----------|---------|-------------------|-----------------|----------|---------------------|-------|-----|----------------------------------------------------------------------------------------|--------------------------------------------------------------------------------------------------------------|-----------|
| K.NPQLQ(+.98)DLDMMLTC(+57.02)VEIKEGALMLPHFSK.A   | N    | 59.95  | 3372.6226 | 29     | 5.7  | 1125.2212 | 3 | 37.84 | 2        | F2:1936 | OB5940 H1 raw.raw | 5.4487E7        | 3        | 3                   | 415   | 443 | Carbamidomethylation                                                                   | Q5:Deamidation (NQ):32.28; C13:Carbamidomethylation:1000.00                                                  | PEAKS DB  |
| R.I(+41.03)P(+15.99)SGFISYILNR.H                 | N    | 59.92  | 1435.7823 | 12     | -3.1 | 718.8962  | 2 | 36.92 | 1        | F1:1841 | OB5939 H1 raw.raw | 1.5727E7        | 4        | 4                   | 260   | 271 | Amidination of lysines or N-terminal amines with methyl acetimidate; Hydroxylation Pro | I1:Amidination of lysines or N-terminal amines with methyl acetimidate:1000.00; P2:Hydroxylation Pro:1000.00 | PEAKS PTM |
| K.A(+41.03)M(+15.99)VIVVVNKG TGNLELVAVR.K        | N    | 59.12  | 2138.2246 | 20     | -4.5 | 1070.1147 | 2 | 33.90 | 2        | F2:1710 | OB5940 H1 raw.raw | 5.8929E6        | 3        | 3                   | 444   | 463 | Amidination of lysines or N-terminal amines with methyl acetimidate; Oxidation (M)     | A1:Amidination of lysines or N-terminal amines with methyl acetimidate:170.86; M2:Oxidation (M):1000.00      | PEAKS PTM |
| K.IRPEGREGQEWGTPGSEVRETSR.N                      | Y    | 58.78  | 2870.3542 | 25     | 1.1  | 957.7931  | 3 | 27.23 | 3        | F3:1290 | OB5941 H1 raw.raw | 4.3127E6        | 4        | 4                   | 141   | 165 |                                                                                        |                                                                                                              | PEAKS DB  |
| E.PDLSNNFR.L                                     | N    | 58.76  | 1018.4832 | 9      | -0.1 | 510.2488  | 2 | 31.24 | 3        | F3:1545 | OB5941 H1 raw.raw | 4.0306E6        | 3        | 3                   | 397   | 405 |                                                                                        |                                                                                                              | PEAKS DB  |
| K.HADADNILVIQQ(+.98)GQ(+.98)ATVTVAN(+.98)GNNRK.S | N    | 56.82  | 2749.3630 | 26     | 9.6  | 917.4704  | 3 | 30.18 | 2        | F2:1487 | OB5940 H1 raw.raw | 4.3875E6        | 1        | 1                   | 223   | 248 |                                                                                        | Q12:Deamidation (NQ):14.02; Q14:Deamidation (NQ):13.03; N21:Deamidation (NQ):11.10                           | PEAKS DB  |
| K.ISMPVNTPGQFEDFFPASSRDQSSYLQGFSR.N              | N    | 56.52  | 3494.6201 | 31     | 3.0  | 1748.3225 | 2 | 35.84 | 1        | F1:1789 | OB5939 H1 raw.raw | 9.3656E7        | 16       | 16                  | 282   | 312 |                                                                                        |                                                                                                              | PEAKS DB  |

total 247 peptides

| Peptide                                                  | Uniq | -10lgP | Mass      | Length | ppm  | m/z       | z | RT    | Fraction | Scan    | Source File       | Area raw peanut | #Feature | #Feature raw peanut | Start | End | PTM                                  | AScore                                                                           | Found By  |
|----------------------------------------------------------|------|--------|-----------|--------|------|-----------|---|-------|----------|---------|-------------------|-----------------|----------|---------------------|-------|-----|--------------------------------------|----------------------------------------------------------------------------------|-----------|
| K.H(+42.01)(+15.99)ADADNILVIQQGQATVTVANGNNRK.S           | N    | 56.30  | 2804.4165 | 26     | -2.5 | 1403.2120 | 2 | 29.79 | 1        | F1:1416 | OB5939 H1 raw.raw | 2.4794E5        | 1        | 1                   | 223   | 248 | Acetylation (N-term); Oxidation (HW) | H1:Acetylation (N-term):100.00;H1:Oxidation (HW):100.00                          | PEAKS PTM |
| K.HADADN(+.98)ILVIQQGQATVTVANGNNRK.S                     | N    | 55.97  | 2747.3950 | 26     | 3.7  | 916.8090  | 3 | 50.62 | 1        | F1:2616 | OB5939 H1 raw.raw | 5.4571E5        | 5        | 5                   | 223   | 248 |                                      | N6:Deamidation (NQ):42.57                                                        | PEAKS DB  |
| K.ISMP(+15.99)VNTPGQGFEDFFPASSRDQSSYLQGF.SR.N            | N    | 55.83  | 3510.6150 | 31     | 2.3  | 1171.2150 | 3 | 34.95 | 1        | F1:1731 | OB5939 H1 raw.raw | 0               | 0        | 0                   | 282   | 312 |                                      | P4:Hydroxylation Pro:49.79                                                       | PEAKS DB  |
| K.ISM(-48.00)PVNTPGQGFEDFFPASSR.D                        | N    | 55.62  | 2178.0381 | 20     | 0.2  | 727.0201  | 3 | 32.37 | 1        | F1:1577 | OB5939 H1 raw.raw | 3.0139E7        | 6        | 6                   | 282   | 301 | Dethiomethyl                         | M3:Dehydromethyl:100.00                                                          | PEAKS PTM |
| K.N(+.98)PQLQDLDMMLTC(+57.02)VEIKEGALMLPHFNSK.A          | N    | 55.55  | 3372.6226 | 29     | 5.7  | 1125.2212 | 3 | 37.84 | 2        | F2:1983 | OB5940 H1 raw.raw | 1.3378E7        | 1        | 1                   | 415   | 443 | Carbamidomethylation                 | N1:Deamidation (NQ):14.04;C13:Carbamidomethylation:1000.00                       | PEAKS DB  |
| K.HADADNILVIQ(+.98)QGQATVTVAN(+.98)GNNRK.S               | N    | 55.03  | 2748.3792 | 26     | 5.1  | 1375.2039 | 2 | 31.28 | 1        | F1:1539 | OB5939 H1 raw.raw | 2.1986E5        | 2        | 2                   | 223   | 248 |                                      | Q11:Deamidation (NQ):15.10;N21:Deamidation (NQ):17.01                            | PEAKS DB  |
| K.HADADNILVIQ(+.98)QGQATVTVANGNNRK.S                     | N    | 55.00  | 2747.3950 | 26     | 5.9  | 916.8110  | 3 | 45.04 | 3        | F3:2357 | OB5941 H1 raw.raw | 2.5167E4        | 1        | 1                   | 223   | 248 |                                      | Q11:Deamidation (NQ):9.34                                                        | PEAKS DB  |
| K.NPQLQDLDM(+15.99)LTC(+57.02)VEIKEGALM(+15.99)LPHFNSK.A | N    | 54.50  | 3403.6284 | 29     | 4.5  | 1135.5552 | 3 | 36.52 | 3        | F3:1873 | OB5941 H1 raw.raw | 6.8814E5        | 2        | 2                   | 415   | 443 | Carbamidomethylation                 | M10:Oxidation (M):12.28;C13:Carbamidomethylation:1000.00;M22:Oxidation (M):28.29 | PEAKS DB  |
| R.EQWEEEEEEEEEGSNREVR.R                                  | N    | 54.08  | 2665.0535 | 21     | 2.4  | 889.3606  | 3 | 27.87 | 1        | F1:1308 | OB5939 H1 raw.raw | 4.4193E5        | 2        | 2                   | 473   | 493 |                                      |                                                                                  | PEAKS DB  |
| K.HADADNILVIQQ(+.98)GQATVTVANGNNRK.S                     | N    | 53.63  | 2747.3950 | 26     | 1.9  | 916.8074  | 3 | 39.56 | 2        | F2:2225 | OB5940 H1 raw.raw | 5.559E5         | 4        | 4                   | 223   | 248 |                                      | Q12:Deamidation (NQ):11.24                                                       | PEAKS DB  |
| N.PFYFPSRR.F                                             | N    | 53.53  | 1068.5504 | 8      | 3.3  | 535.2842  | 2 | 28.95 | 1        | F1:1360 | OB5939 H1 raw.raw | 3.1024E6        | 3        | 3                   | 168   | 175 |                                      |                                                                                  | PEAKS DB  |
| total 247 peptides                                       |      |        |           |        |      |           |   |       |          |         |                   |                 |          |                     |       |     |                                      |                                                                                  |           |

| Peptide                                            | Uniq | -10lgP | Mass      | Length | ppm  | m/z       | z | RT    | Fraction | Scan    | Source File       | Area raw peanut | #Feature | #Feature raw peanut | Start | End | PTM                                | AScore                                                   | Found By  |
|----------------------------------------------------|------|--------|-----------|--------|------|-----------|---|-------|----------|---------|-------------------|-----------------|----------|---------------------|-------|-----|------------------------------------|----------------------------------------------------------|-----------|
| R.LFEVKPDKKNPQLQDLMM(+15.99)LTC(+57.02)VEIK.E      | N    | 53.37  | 3147.6018 | 26     | -4.4 | 787.9042  | 4 | 32.55 | 3        | F3:1633 | OB5941 H1 raw.raw | 2.1681E6        | 3        | 3                   | 406   | 431 | Carbamidomethylation               | M19:Oxidation (M):17.01;C2:Carbamidomethylation:1000.00  | PEAKS DB  |
| K.HADADNILVIQQ(+.98)GQATVTVAN(+.98)GNNRK.S         | N    | 52.71  | 2748.3792 | 26     | 3.1  | 1375.2010 | 2 | 30.08 | 3        | F3:1495 | OB5941 H1 raw.raw | 1.5758E6        | 1        | 1                   | 223   | 248 |                                    | Q12:Deamidation (N Q):27.58;N21:Deamidation (NQ):15.73   | PEAKS DB  |
| K.NPQLQDLDMMLTCVEIK(+14.02)EGALM(+15.99)LPHFNSK.A  | N    | 52.56  | 3344.6277 | 29     | 4.1  | 837.1677  | 4 | 37.13 | 2        | F2:1903 | OB5940 H1 raw.raw | 1.5437E6        | 1        | 1                   | 415   | 443 | Oxidation (M)                      | K17:Methylation(KR):24.93;M22:Oxidation (M):51.99        | PEAKS PTM |
| K.ISM(+15.99)PVNTPGQFEDFFPASSRDQ(+.98)SSYLQGF.SR.N | N    | 52.28  | 3511.5989 | 31     | 4.3  | 1171.5453 | 3 | 34.92 | 1        | F1:1731 | OB5939 H1 raw.raw | 1.6252E6        | 1        | 1                   | 282   | 312 | Oxidation (M)                      | M3:Oxidation (M):1000.00;Q22:Deamidation (N Q):20.93     | PEAKS DB  |
| R.NT(-18.01)LEAAFNAAFNEIRR.V                       | N    | 52.23  | 1875.9227 | 16     | -2.4 | 626.3134  | 3 | 33.43 | 2        | F2:1683 | OB5940 H1 raw.raw | 1.354E7         | 3        | 3                   | 313   | 328 | Dehydration                        | T2:Dehydration:1000.00                                   | PEAKS PTM |
| L.EAAFNAAFNEIRR.V                                  | N    | 52.09  | 1565.7585 | 13     | -4.7 | 783.8829  | 2 | 34.06 | 1        | F1:1677 | OB5939 H1 raw.raw | 1.7113E6        | 2        | 2                   | 316   | 328 |                                    |                                                          | PEAKS DB  |
| R.LFEVKPDK.K                                       | N    | 51.87  | 974.5436  | 8      | 0.9  | 488.2795  | 2 | 25.40 | 1        | F1:1153 | OB5939 H1 raw.raw | 7.0978E5        | 6        | 6                   | 406   | 413 |                                    |                                                          | PEAKS DB  |
| R.WGPAEPR.E                                        | Y    | 51.81  | 811.3976  | 7      | 1.2  | 406.7066  | 2 | 25.31 | 3        | F3:1167 | OB5941 H1 raw.raw | 1.2136E6        | 3        | 3                   | 109   | 115 |                                    |                                                          | PEAKS DB  |
| K.AM(-48.00)VIVVVNKGTLNLELVAVRK.E                  | N    | 51.58  | 2161.2947 | 21     | 1.4  | 1081.6561 | 2 | 29.80 | 3        | F3:1453 | OB5941 H1 raw.raw | 6.785E6         | 4        | 4                   | 444   | 464 | Dethiomethyl                       | M2:Dehydration:1000.00                                   | PEAKS PTM |
| R.IFLAGDKDNVIDQIEK(+14.02)(+43.01).Q               | N    | 51.42  | 1873.9785 | 16     | 1.0  | 937.9974  | 2 | 32.37 | 1        | F1:1563 | OB5939 H1 raw.raw | 1.103E7         | 1        | 1                   | 536   | 551 | Methylation(C-term); Carbamylation | K16:Methylation(C-term):1000.00;K16:Carbamylation:164.73 | PEAKS PTM |

total 247 peptides

| Peptide                                                 | Uniq | -10lgP | Mass      | Length | ppm  | m/z       | z | RT    | Fraction | Scan    | Source File       | Area raw peanut | #Feature | #Feature raw peanut | Start | End | PTM                                    | AScore                                                                           | Found By  |
|---------------------------------------------------------|------|--------|-----------|--------|------|-----------|---|-------|----------|---------|-------------------|-----------------|----------|---------------------|-------|-----|----------------------------------------|----------------------------------------------------------------------------------|-----------|
| K.HADADNILVIQQGQAT(-18.01)VTVAN(+.98)GNNRK.S            | N    | 51.33  | 2729.3845 | 26     | -1.3 | 910.8009  | 3 | 31.10 | 3        | F3:1500 | OB5941 H1 raw.raw | 8.3833E5        | 2        | 2                   | 223   | 248 |                                        | T16:Dehydration:11.99;N21:Deamidation(NQ):13.67                                  | PEAKS PTM |
| K.S(+43.01)(+14.02)FNLDEGHALR.I                         | N    | 51.03  | 1314.6316 | 11     | 0.8  | 658.3236  | 2 | 27.58 | 3        | F3:1340 | OB5941 H1 raw.raw | 4.5043E6        | 4        | 4                   | 249   | 259 | Carbamylation; Methylation(others)     | S1:Carbamylation:100.00; S1:Methylation(others):109.97                           | PEAKS PTM |
| K.NPQLQDLDMM(+15.99)LTCVEIK(+14.02).E                   | N    | 51.01  | 2019.9679 | 17     | -7.0 | 1010.9842 | 2 | 37.36 | 1        | F1:1877 | OB5939 H1 raw.raw | 0               | 0        | 0                   | 415   | 431 | Methylation(KR)                        | M10:Oxidation(M):11.06;K17:Methylation(KR):1000.00                               | PEAKS PTM |
| R.RVLEENAGGEQEERGQR.R                                   | N    | 50.12  | 2069.0249 | 18     | 2.1  | 690.6837  | 3 | 24.88 | 2        | F2:1165 | OB5940 H1 raw.raw | 2.8524E5        | 1        | 1                   | 328   | 345 |                                        |                                                                                  | PEAKS DB  |
| K.KNPQLQDLDMM(-48.00)LTC(+57.02)VEIK.E                  | N    | 49.96  | 2127.0703 | 18     | 1.7  | 710.0319  | 3 | 30.71 | 2        | F2:1521 | OB5940 H1 raw.raw | 3.3467E6        | 2        | 2                   | 414   | 431 | Carbamidomethylation                   | M11:Dehydration:14.02;C14:Carbamidomethylation:1000.00                           | PEAKS PTM |
| N.LDEGHALR.I                                            | N    | 49.09  | 909.4668  | 8      | 0.6  | 455.7409  | 2 | 27.35 | 2        | F2:1312 | OB5940 H1 raw.raw | 3.1446E4        | 1        | 1                   | 252   | 259 |                                        |                                                                                  | PEAKS DB  |
| K.KNPQLQDLDMMLTCVEIK(+14.02)EGALMLPHFSK.A               | N    | 49.06  | 3456.7278 | 30     | 2.7  | 865.1915  | 4 | 36.90 | 2        | F2:1892 | OB5940 H1 raw.raw | 3.1386E5        | 1        | 1                   | 414   | 443 | Methylation(KR)                        | K18:Methylation(KR):50.90                                                        | PEAKS PTM |
| K.NPQLQDLDMM(+15.99)LTC(+57.02)VEIKEGALMLPHFN(+.98)SK.A | N    | 48.99  | 3388.6174 | 29     | 5.0  | 848.1659  | 4 | 36.17 | 3        | F3:1849 | OB5941 H1 raw.raw | 7.0919E6        | 2        | 2                   | 415   | 443 | Carbamidomethylation; Deamidation (NQ) | M10:Oxidation(M):0.00;C13:Carbamidomethylation:1000.00;N27:Deamidation(NQ):51.54 | PEAKS DB  |
| K.HADADNILVIQQ(+.98)GQATVTVANGNN(+.98)RK.S              | N    | 48.74  | 2748.3792 | 26     | 8.9  | 917.1418  | 3 | 48.01 | 1        | F1:2471 | OB5939 H1 raw.raw | 2.2044E4        | 1        | 1                   | 223   | 248 |                                        | Q12:Deamidation(NQ):23.10;N24:Deamidation(NQ):0.00                               | PEAKS DB  |

total 247 peptides



| Peptide                                                   | Uniq | -10lgP | Mass      | Length | ppm  | m/z       | z | RT    | Fraction | Scan    | Source File       | Area raw peanut | #Feature | #Feature raw peanut | Start | End | PTM                                    | AScore                                                                                 | Found By  |
|-----------------------------------------------------------|------|--------|-----------|--------|------|-----------|---|-------|----------|---------|-------------------|-----------------|----------|---------------------|-------|-----|----------------------------------------|----------------------------------------------------------------------------------------|-----------|
| R.LFEVKPDKKNPQLQDLDM(+15.99)M(+15.99)LTC(+57.02)VEIK.E    | N    | 48.67  | 3163.5967 | 26     | 2.1  | 791.9081  | 4 | 32.37 | 1        | F1:1585 | OB5939 H1 raw.raw | 6.4006E5        | 1        | 1                   | 406   | 431 | Oxidation (M); Carbamidomethylation    | M18:Oxidation (M):1000.00; M19:Oxidation (M):1000.00; C22:Carbamidomethylation:1000.00 | PEAKS DB  |
| K.NPQLQDLDM(+15.99)MLTC(+57.02)VEIKEGALM(+15.99)LPHFNSK.A | N    | 48.60  | 3403.6284 | 29     | 2.2  | 851.9163  | 4 | 36.24 | 2        | F2:1851 | OB5940 H1 raw.raw | 3.928E6         | 2        | 2                   | 415   | 443 | Carbamidomethylation; Oxidation (M)    | M9:Oxidation (M):10.11; C13:Carbamidomethylation:1000.00; M22:Oxidation (M):53.09      | PEAKS DB  |
| N.TPGQFEDFFPASSR.D                                        | N    | 48.49  | 1584.7208 | 14     | -0.2 | 793.3676  | 2 | 35.63 | 3        | F3:1821 | OB5941 H1 raw.raw | 2.7376E5        | 1        | 1                   | 288   | 301 |                                        |                                                                                        | PEAKS DB  |
| K.ISMP(+15.99)VNTPGQFEDFFPASSR.D                          | N    | 48.39  | 2242.0364 | 20     | 6.5  | 1122.0327 | 2 | 45.36 | 1        | F1:2277 | OB5939 H1 raw.raw | 8.1169E4        | 2        | 2                   | 282   | 301 |                                        | P4:Hydroxylation Pro:33.81                                                             | PEAKS DB  |
| R.NTLEAAFN(+.98)AEFNEIRR.V                                | N    | 48.19  | 1894.9172 | 16     | -0.3 | 948.4656  | 2 | 32.92 | 1        | F1:1570 | OB5939 H1 raw.raw | 1.5926E6        | 1        | 1                   | 313   | 328 |                                        | N8:Deamidation (NQ):8.26                                                               | PEAKS DB  |
| K.NPQLQDLDMMLTC(+57.02)VEIKEGALMLPHFN(+.98)SK.A           | N    | 47.92  | 3372.6226 | 29     | 7.4  | 844.1691  | 4 | 37.85 | 2        | F2:1914 | OB5940 H1 raw.raw | 5.3901E7        | 2        | 2                   | 415   | 443 | Carbamidomethylation; Deamidation (NQ) | C13:Carbamidomethylation:1000.00; N27:Deamidation (NQ):61.84                           | PEAKS DB  |
| K.ISMP(+15.99)VNTPGQ(+.98)FEDFFPASSR.D                    | N    | 47.82  | 2243.0205 | 20     | 6.2  | 1122.5245 | 2 | 50.73 | 1        | F1:2643 | OB5939 H1 raw.raw | 0               | 0        | 0                   | 282   | 301 |                                        | P4:Hydroxylation Pro:38.03; Q10:Deamidation (NQ):19.56                                 | PEAKS DB  |
| R.SKQFQNLQNHR.I                                           | Y    | 47.59  | 1398.7117 | 11     | 1.0  | 467.2450  | 3 | 24.31 | 2        | F2:1132 | OB5940 H1 raw.raw | 2.9256E4        | 3        | 3                   | 197   | 207 |                                        |                                                                                        | PEAKS DB  |
| R.K(+43.01)(+14.02)SFNLDEGHALR.I                          | N    | 47.09  | 1442.7266 | 12     | -0.4 | 481.9159  | 3 | 25.70 | 3        | F3:1209 | OB5941 H1 raw.raw | 2.261E5         | 3        | 3                   | 248   | 259 | Carbamylation; Methylation(KR)         | K1:Carbamylation:1000.00; K1:Methylation (KR):160.69                                   | PEAKS PTM |

total 247 peptides

| Peptide                                     | Uniq | -10lgP | Mass      | Length | ppm  | m/z       | z | RT    | Fraction | Scan    | Source File       | Area raw peanut | #Feature | #Feature raw peanut | Start | End | PTM                                                                                | AScore                                                                                                   | Found By  |
|---------------------------------------------|------|--------|-----------|--------|------|-----------|---|-------|----------|---------|-------------------|-----------------|----------|---------------------|-------|-----|------------------------------------------------------------------------------------|----------------------------------------------------------------------------------------------------------|-----------|
| K.ISM(+15.99)PVNTPGQFEDFFPASSRDQSSYLQGFSR.N | N    | 47.05  | 3510.6150 | 31     | 4.2  | 1171.2172 | 3 | 34.34 | 2        | F2:1739 | OB5940 H1 raw.raw | 6.0177E6        | 2        | 2                   | 282   | 312 | Oxidation (M)                                                                      | M3:Oxidation (M):10.00.00                                                                                | PEAKS DB  |
| K.QFQNLQNHR.I                               | N    | 46.78  | 1183.5846 | 9      | 0.4  | 592.7998  | 2 | 23.96 | 2        | F2:1106 | OB5940 H1 raw.raw | 7.7423E4        | 5        | 5                   | 199   | 207 |                                                                                    |                                                                                                          | PEAKS DB  |
| D.KDNVIDQIEK.Q                              | N    | 46.62  | 1200.6350 | 10     | -0.8 | 601.3243  | 2 | 25.89 | 3        | F3:1225 | OB5941 H1 raw.raw | 4.877E4         | 2        | 2                   | 542   | 551 |                                                                                    |                                                                                                          | PEAKS DB  |
| K.AMVIVVN(+.98)KGTGNLELVAVRK.E              | N    | 46.54  | 2210.2820 | 21     | 9.6  | 737.7750  | 3 | 33.10 | 3        | F3:1695 | OB5941 H1 raw.raw | 8.2125E6        | 2        | 2                   | 444   | 464 |                                                                                    | N8:Deamidation (NQ):41.87                                                                                | PEAKS DB  |
| Q.GQATVTVANGNNRK.S                          | N    | 46.45  | 1428.7433 | 14     | -0.2 | 715.3788  | 2 | 29.02 | 3        | F3:1412 | OB5941 H1 raw.raw | 1.3861E5        | 2        | 2                   | 235   | 248 |                                                                                    |                                                                                                          | PEAKS DB  |
| R.EQEWEDEDEDEEGSNREVR.R                     | N    | 46.42  | 2821.1545 | 22     | 1.8  | 941.3939  | 3 | 26.75 | 1        | F1:1227 | OB5939 H1 raw.raw | 3.455E6         | 3        | 3                   | 473   | 494 |                                                                                    |                                                                                                          | PEAKS DB  |
| K.Q(-17.03)AKDLAFPGSGEQVEK.L                | N    | 45.78  | 1685.8260 | 16     | 0.9  | 843.9211  | 2 | 29.97 | 1        | F1:1427 | OB5939 H1 raw.raw | 0               | 0        | 0                   | 552   | 567 | Pyro-glu from Q                                                                    | Q1:Pyro-glu from Q:1000.00                                                                               | PEAKS PTM |
| K.HADAD(-18.01)NILVIQQGQATVTVANGNNRK.S      | N    | 45.35  | 2728.4004 | 26     | 3.5  | 910.4772  | 3 | 28.70 | 2        | F2:1390 | OB5940 H1 raw.raw | 0               | 0        | 0                   | 223   | 248 |                                                                                    | D5:Dehydration:30.36                                                                                     | PEAKS PTM |
| K.KN(+.98)PQLQDLDM(+15.99)LTC(+57.02)VEIK.E | N    | 44.87  | 2192.0527 | 18     | 9.2  | 1097.0437 | 2 | 32.33 | 2        | F2:1621 | OB5940 H1 raw.raw | 8.5764E4        | 1        | 1                   | 414   | 431 | Carbamidomethylation                                                               | N2:Deamidation (NQ):14.04; M11:Oxidation (M):0.00; C14:Carbamidomethylation:1000.00                      | PEAKS DB  |
| R.KSFNLDEGHALRIPSGFISYILN(+.98)R.H          | N    | 44.70  | 2747.4395 | 24     | 4.5  | 687.8702  | 4 | 36.15 | 3        | F3:1837 | OB5941 H1 raw.raw | 1.1013E6        | 1        | 1                   | 248   | 271 |                                                                                    | N23:Deamidation (NQ):0.00                                                                                | PEAKS DB  |
| K.IRPEGREGQEWGTPGSEVR.E                     | Y    | 44.50  | 2268.0881 | 20     | 1.1  | 757.0375  | 3 | 26.28 | 3        | F3:1248 | OB5941 H1 raw.raw | 7.4174E4        | 2        | 2                   | 141   | 160 |                                                                                    |                                                                                                          | PEAKS DB  |
| W.GTPGSEVRETSR.N                            | Y    | 44.35  | 1403.6641 | 13     | 3.5  | 702.8417  | 2 | 27.60 | 3        | F3:1327 | OB5941 H1 raw.raw | 7.5188E4        | 1        | 1                   | 153   | 165 |                                                                                    |                                                                                                          | PEAKS DB  |
| K.A(+41.03)M(+15.99)VIVVNKGTGNLELVAVRK.E    | N    | 44.32  | 2266.3196 | 21     | -1.6 | 1134.1653 | 2 | 32.33 | 2        | F2:1602 | OB5940 H1 raw.raw | 5.361E7         | 7        | 7                   | 444   | 464 | Amidination of lysines or N-terminal amines with methyl acetimidate; Oxidation (M) | A1:Amidination of lysines or N-terminal amines with methyl acetimidate:161.20; M2:Oxidation (M):10.00.00 | PEAKS PTM |

total 247 peptides

| Peptide                                                   | Uniq | -10lgP | Mass      | Length | ppm  | m/z       | z | RT    | Fraction | Scan    | Source File       | Area raw peanut | #Feature | #Feature raw peanut | Start | End | PTM                  | AScore                                                                                | Found By  |
|-----------------------------------------------------------|------|--------|-----------|--------|------|-----------|---|-------|----------|---------|-------------------|-----------------|----------|---------------------|-------|-----|----------------------|---------------------------------------------------------------------------------------|-----------|
| V.QIEARPNTLVLPK.H                                         | Y    | 43.15  | 1477.8616 | 13     | -3.7 | 739.9353  | 2 | 30.24 | 3        | F3:1485 | OB5941 H1 raw.raw | 1.0391E6        | 3        | 3                   | 210   | 222 |                      |                                                                                       | PEAKS DB  |
| R.LFEVKPDKK.N                                             | N    | 43.08  | 1102.6385 | 9      | 1.1  | 552.3271  | 2 | 24.94 | 3        | F3:1179 | OB5941 H1 raw.raw | 2.3087E5        | 2        | 2                   | 406   | 414 |                      |                                                                                       | PEAKS DB  |
| N.TLEAAFNAEFNEIRR.V                                       | N    | 43.00  | 1779.8904 | 15     | -3.0 | 890.9498  | 2 | 32.91 | 3        | F3:1655 | OB5941 H1 raw.raw | 4.3913E5        | 1        | 1                   | 314   | 328 |                      |                                                                                       | PEAKS DB  |
| K.NPQLQDLDMMLTC(+57.02)VEIKEGALM(-48.00)LPHFNSK.A         | N    | 42.94  | 3323.6353 | 29     | -1.0 | 831.9153  | 4 | 35.81 | 3        | F3:1829 | OB5941 H1 raw.raw | 2.5446E6        | 1        | 1                   | 415   | 443 | Carbamidomethylation | C13:Carbamidomethylation:1000.00; M22:Deamidation:30.24                               | PEAKS PTM |
| K.ISM(+15.99)PVN(+.98)TPGQFEDFFPASSR.D                    | N    | 42.69  | 2243.0205 | 20     | 7.6  | 1122.5260 | 2 | 49.72 | 2        | F2:2625 | OB5940 H1 raw.raw | 0               | 0        | 0                   | 282   | 301 | Oxidation (M)        | M3:Oxidation (M):1000.00; N6:Deamidation (NQ):25.70                                   | PEAKS DB  |
| K.KNPQLQ(+.98)DLDMMLTC(+57.02)VEIKEGALMLPHFNSK.A          | N    | 42.58  | 3500.7175 | 30     | 0.4  | 1167.9136 | 3 | 36.34 | 2        | F2:1850 | OB5940 H1 raw.raw | 5.0176E5        | 1        | 1                   | 414   | 443 | Carbamidomethylation | Q6:Deamidation (NQ):14.04; C14:Carbamidomethylation:1000.00                           | PEAKS DB  |
| R.REQEWEEEEEEEEEGSN(+.98)R.E                              | N    | 42.55  | 2437.9265 | 19     | 7.6  | 813.6556  | 3 | 26.55 | 1        | F1:1226 | OB5939 H1 raw.raw | 3.9265E4        | 1        | 1                   | 472   | 490 |                      | N18:Deamidation (NQ):0.00                                                             | PEAKS DB  |
| K.NPQLQDLDMMLTC(+57.02)VEIK(+43.01)EGALMLPHFNSK(+14.02).A | N    | 42.54  | 3428.6602 | 29     | -4.2 | 1143.8892 | 3 | 37.82 | 3        | F3:1939 | OB5941 H1 raw.raw | 1.0346E6        | 1        | 1                   | 415   | 443 | Carbamidomethylation | C13:Carbamidomethylation:1000.00; K17:Carbamylation:10.80; K29:Methylation (KR):10.80 | PEAKS PTM |
| K.HADADNILVIQ(+.98)QGQ(+.98)ATVTVANGNNRK.S                | N    | 42.52  | 2748.3792 | 26     | 3.1  | 917.1365  | 3 | 57.24 | 2        | F2:3064 | OB5940 H1 raw.raw | 0               | 0        | 0                   | 223   | 248 |                      | Q11:Deamidation (NQ):0.00; Q14:Deamidation (NQ):0.00                                  | PEAKS DB  |

total 247 peptides

| Peptide                                       | Uniq | -10lgP | Mass      | Length | ppm  | m/z       | z | RT    | Fraction | Scan    | Source File       | Area raw peanut | #Feature | #Feature raw peanut | Start | End | PTM                                | AScore                                                                       | Found By  |
|-----------------------------------------------|------|--------|-----------|--------|------|-----------|---|-------|----------|---------|-------------------|-----------------|----------|---------------------|-------|-----|------------------------------------|------------------------------------------------------------------------------|-----------|
| R.IFLAGDKDNVIDQIEK(+43.01)QAK(+14.02).D       | N    | 42.41  | 2201.1692 | 19     | 2.7  | 734.7323  | 3 | 32.55 | 1        | F1:1581 | OB5939 H1 raw.raw | 3.5153E6        | 1        | 1                   | 536   | 554 |                                    | K16:Carbamylation:0.00;K19:Methylation(KR):0.00                              | PEAKS PTM |
| K.GTGNLELVAVRKEQQQR.G                         | N    | 41.95  | 1925.0442 | 17     | 1.8  | 642.6898  | 3 | 26.36 | 1        | F1:1214 | OB5939 H1 raw.raw | 1.4197E5        | 3        | 3                   | 453   | 469 |                                    |                                                                              | PEAKS DB  |
| R.IFLAGDKDNVIDQIEK(+14.02)Q(+.98)AK(+42.01).D | N    | 41.87  | 2201.1580 | 19     | 3.1  | 734.7289  | 3 | 31.83 | 2        | F2:1588 | OB5940 H1 raw.raw | 3.595E6         | 2        | 2                   | 536   | 554 |                                    | K16:Methylation(KR):13.38;Q17:Deamidation(NQ):25.11;K19:Acetylation(K):13.38 | PEAKS PTM |
| K.D(+43.01)(+14.02)LAFPGSGEQVEK.L             | N    | 41.75  | 1432.6833 | 13     | 3.8  | 717.3517  | 2 | 30.92 | 1        | F1:1485 | OB5939 H1 raw.raw | 2.8695E5        | 1        | 1                   | 555   | 567 | Carbamylation; Methylation(others) | D1:Carbamylation:16.6.34;D11:Methylation(others):102.87                      | PEAKS PTM |
| R.IFLAGDKDNVIDQ(+.98)IEK.Q                    | N    | 41.66  | 1817.9410 | 16     | 9.1  | 909.9861  | 2 | 66.49 | 2        | F2:3489 | OB5940 H1 raw.raw | 4.5271E4        | 3        | 3                   | 536   | 551 |                                    | Q13:Deamidation(NQ):38.67                                                    | PEAKS DB  |
| L.DEGHALR.I                                   | N    | 40.78  | 796.3828  | 7      | 2.3  | 399.1996  | 2 | 27.48 | 2        | F2:1315 | OB5940 H1 raw.raw | 2.4528E4        | 1        | 1                   | 253   | 259 |                                    |                                                                              | PEAKS DB  |
| K.HADADNILVIQ(+.98)QGQATVTVANGN(+.98)NRK.S    | N    | 40.70  | 2748.3792 | 26     | 8.8  | 917.1417  | 3 | 55.82 | 2        | F2:2975 | OB5940 H1 raw.raw | 2.5591E3        | 1        | 1                   | 223   | 248 |                                    | Q11:Deamidation(NQ):0.00;N23:Deamidation(NQ):0.00                            | PEAKS DB  |
| K.ISMPVN(+.98)TPGQFEDFFPASSR.D                | N    | 40.63  | 2227.0254 | 20     | 9.3  | 1114.5303 | 2 | 58.23 | 3        | F3:3170 | OB5941 H1 raw.raw | 2.6294E4        | 2        | 2                   | 282   | 301 |                                    | N6:Deamidation(NQ):42.89                                                     | PEAKS DB  |
| R.IFLAGD(+14.02)K(+43.01)DNVIDQIEK.Q          | N    | 40.36  | 1873.9785 | 16     | -5.0 | 937.9919  | 2 | 32.19 | 3        | F3:1583 | OB5941 H1 raw.raw | 4.0088E7        | 4        | 4                   | 536   | 551 | Carbamylation                      | D6:Methylation(others):24.32;K7:Carbamylation:57.71                          | PEAKS PTM |

total 247 peptides

| Peptide                                                      | Uniq | -10lgP | Mass      | Length | ppm   | m/z       | z | RT    | Fraction | Scan    | Source File       | Area raw peanut | #Feature | #Feature raw peanut | Start | End | PTM                                     | AScore                                                                                                            | Found By  |
|--------------------------------------------------------------|------|--------|-----------|--------|-------|-----------|---|-------|----------|---------|-------------------|-----------------|----------|---------------------|-------|-----|-----------------------------------------|-------------------------------------------------------------------------------------------------------------------|-----------|
| K.KN(+.98)PQLQLDMLTLC(+57.02)VEIKEGALMLPHFNSK.A              | N    | 40.34  | 3500.7175 | 30     | 7.1   | 876.1929  | 4 | 36.26 | 2        | F2:1847 | OB5940 H1 raw.raw | 2.213E6         | 1        | 1                   | 414   | 443 | Carbamidomethylation                    | N2:Deamidation (NQ): 0.00; C14:Carbamidomethylation: 1000.00                                                      | PEAKS DB  |
| K.NPQLQLDLM(+15.99)MLTC(+57.02)VEIKEGALMLP(+15.99)HFNSK.A    | N    | 40.24  | 3403.6284 | 29     | -10.2 | 851.9057  | 4 | 36.72 | 1        | F1:1838 | OB5939 H1 raw.raw | 0               | 0        | 0                   | 415   | 443 | Carbamidomethylation; Hydroxylation Pro | M9:Oxidation (M):26.02; C13:Carbamidomethylation: 1000.00; P24:Hydroxylation Pro:63.93                            | PEAKS DB  |
| R.ESHFVSARPSQSP(+15.99)SSPEKEDQEEEN.Q                        | N    | 40.09  | 2973.2859 | 26     | -2.5  | 992.1001  | 3 | 25.16 | 1        | F1:1143 | OB5939 H1 raw.raw | 0               | 0        | 0                   | 574   | 599 |                                         | P14:Hydroxylation Pro:29.32                                                                                       | PEAKS DB  |
| K.SFN(+.98)LDEGHALRIPSGFISYILNR.H                            | N    | 39.87  | 2619.3445 | 23     | 9.3   | 655.8495  | 4 | 38.22 | 1        | F1:1947 | OB5939 H1 raw.raw | 1.0439E6        | 2        | 2                   | 249   | 271 |                                         | N3:Deamidation (NQ): 39.81                                                                                        | PEAKS DB  |
| T.PGQFEDFFPASSR.D                                            | N    | 39.65  | 1483.6731 | 13     | -1.3  | 742.8429  | 2 | 40.34 | 2        | F2:2103 | OB5940 H1 raw.raw | 3.5787E3        | 1        | 1                   | 289   | 301 |                                         |                                                                                                                   | PEAKS DB  |
| K.EGALM(-48.00)LPHFNSK.A                                     | N    | 38.72  | 1294.6670 | 12     | 2.0   | 432.5638  | 3 | 28.31 | 3        | F3:1348 | OB5941 H1 raw.raw | 1.3523E6        | 1        | 1                   | 432   | 443 | Dethiomethyl                            | M5:Dethiomethylation:1000.00                                                                                      | PEAKS PTM |
| K.ISMPVNTPGQ(+.98)FEDFFPASSRDQSSYLQGFSR.N                    | N    | 38.62  | 3495.6040 | 31     | 6.7   | 1166.2164 | 3 | 54.16 | 3        | F3:2883 | OB5941 H1 raw.raw | 0               | 0        | 0                   | 282   | 312 |                                         | Q10:Deamidation (NQ):5.38                                                                                         | PEAKS DB  |
| R.DQS(-18.01)SYLQGFSR.N                                      | N    | 38.22  | 1268.5785 | 11     | 7.0   | 635.3010  | 2 | 30.87 | 1        | F1:1484 | OB5939 H1 raw.raw | 0               | 0        | 0                   | 302   | 312 |                                         | S3:Dehydration:33.98                                                                                              | PEAKS PTM |
| K.N(+.98)PQ(+.98)LQLDMLTLC(+57.02)VEIKEGALM(+15.99)LPHFNSK.A | N    | 37.95  | 3389.6016 | 29     | 9.0   | 848.4153  | 4 | 36.92 | 1        | F1:1851 | OB5939 H1 raw.raw | 8.517E6         | 2        | 2                   | 415   | 443 | Carbamidomethylation                    | N1:Deamidation (NQ): 11.12; Q3:Deamidation (NQ): 0.00; C13:Carbamidomethylation: 1000.00; M22:Oxidation (M):24.93 | PEAKS DB  |
| K.SFN(+.98)LDEGHALRIPSGFISYILNRHDNQNLR.V                     | N    | 37.76  | 3496.7600 | 30     | -3.9  | 700.3566  | 5 | 36.38 | 1        | F1:1849 | OB5939 H1 raw.raw | 7.9247E5        | 1        | 1                   | 249   | 278 |                                         | N3:Deamidation (NQ): 20.27                                                                                        | PEAKS DB  |

total 247 peptides

| Peptide                                          | Uniq | -10lgP | Mass      | Length | ppm  | m/z       | z | RT    | Fraction | Scan    | Source File       | Area raw peanut | #Feature | #Feature raw peanut | Start | End | PTM                                           | AScore                                                                                | Found By  |
|--------------------------------------------------|------|--------|-----------|--------|------|-----------|---|-------|----------|---------|-------------------|-----------------|----------|---------------------|-------|-----|-----------------------------------------------|---------------------------------------------------------------------------------------|-----------|
| R.E(-18.01)GEQEWGTPGSEVRETSR.N                   | Y    | 37.06  | 2143.9407 | 19     | 2.9  | 715.6562  | 3 | 27.17 | 2        | F2:1294 | OB5940 H1 raw.raw | 9.0561E4        | 1        | 1                   | 147   | 165 | Pyro-glu from E                               | E1:Pyro-glu from E:1000.00                                                            | PEAKS PTM |
| K.NPQLQDLDM(-48.00)LTC(+57.02)VEIKEGALMLPHFNSK.A | N    | 36.81  | 3323.6353 | 29     | 0.8  | 1108.8866 | 3 | 35.97 | 3        | F3:1833 | OB5941 H1 raw.raw | 5.0189E6        | 2        | 2                   | 415   | 443 | Carbamidomethylation                          | M10:De thiomethyl:8.14;C13:Carbamidomethylation:1000.00                               | PEAKS PTM |
| R.LFEVKPKDKKN(+.98)PQLQDLDMMLTC(+57.02)VEIK.E    | N    | 36.71  | 3132.5908 | 26     | 9.3  | 1567.3173 | 2 | 34.35 | 3        | F3:1745 | OB5941 H1 raw.raw | 2.2872E5        | 1        | 1                   | 406   | 431 | Carbamidomethylation                          | N10:De amidation (NQ):14.04;C22:Carbamidomethylation:1000.00                          | PEAKS DB  |
| R.IVQIEAR(+28.03)PN(+.98)TLVLPHK.H               | Y    | 36.70  | 1719.0294 | 15     | 0.1  | 860.5220  | 2 | 30.00 | 2        | F2:1445 | OB5940 H1 raw.raw | 1.1278E7        | 2        | 2                   | 208   | 222 | Dimethylation(KR); Deamidation (NQ)           | R7:Dim ethylation(KR):71.07; N9:Deamidation (NQ):90.21                                | PEAKS PTM |
| R.ESHFVSARPSQSP(+15.99)SSPEKEDQEEE.N             | N    | 36.67  | 2859.2429 | 25     | 2.6  | 954.0907  | 3 | 24.51 | 2        | F2:1151 | OB5940 H1 raw.raw | 1.0898E4        | 1        | 1                   | 574   | 598 |                                               | P14:Hydroxylation Pro:12.33                                                           | PEAKS DB  |
| K.NPQLQDLDM(+15.99)M(+15.99)LTC(+57.02)VEIK.E    | N    | 36.40  | 2078.9688 | 17     | 1.1  | 1040.4928 | 2 | 33.80 | 3        | F3:1701 | OB5941 H1 raw.raw | 0               | 0        | 0                   | 415   | 431 | Oxidation (M); Carbamidomethylation           | M9:Oxidation (M):1000.00; M10:Oxidation (M):1000.00; C13:Carbamidomethylation:1000.00 | PEAKS DB  |
| R.IVQIEARPNTLVLP(+15.99)K(-.98)(+42.01).H        | Y    | 36.38  | 1747.0355 | 15     | -2.4 | 874.5229  | 2 | 30.35 | 2        | F2:1460 | OB5940 H1 raw.raw | 8.4907E6        | 1        | 1                   | 208   | 222 | Hydroxylation Pro; Amidation; Acetylation (K) | P14:Hydroxylation Pro:74.55;K15:Amidation:1000.00;K15:Acetylation (K):1000.00         | PEAKS PTM |
| R.N(-17.03)NPFYFPSRR.F                           | N    | 36.19  | 1279.6097 | 10     | -0.4 | 427.5437  | 3 | 28.25 | 2        | F2:1369 | OB5940 H1 raw.raw | 1.5243E5        | 1        | 1                   | 166   | 175 |                                               | N1:Ammonia-loss (N):0.00                                                              | PEAKS PTM |

total 247 peptides

| Peptide                                                  | Uniq | -10lgP | Mass      | Length | ppm  | m/z       | z | RT    | Fraction | Scan    | Source File       | Area raw peanut | #Feature | #Feature raw peanut | Start | End | PTM                  | AScore                                                                              | Found By  |
|----------------------------------------------------------|------|--------|-----------|--------|------|-----------|---|-------|----------|---------|-------------------|-----------------|----------|---------------------|-------|-----|----------------------|-------------------------------------------------------------------------------------|-----------|
| K.AM(+31.99)VIVVVNKG TGNLELVAVRK.E                       | N    | 36.16  | 2241.2878 | 21     | 1.1  | 748.1041  | 3 | 31.46 | 1        | F1:1540 | OB5939 H1 raw.raw | 1.7223E5        | 1        | 1                   | 444   | 464 | Sulphone             | M2:Sulphone:1000.00                                                                 | PEAKS PTM |
| K.NPQ(+.98)LQDLDMMLTC(+57.02)VEIKEGALMLPHFNSK.A          | N    | 36.11  | 3372.6226 | 29     | 9.4  | 1125.2253 | 3 | 40.75 | 1        | F1:2064 | OB5939 H1 raw.raw | 5.8612E5        | 1        | 1                   | 415   | 443 | Carbamidomethylation | Q3:Deamidation (NQ):0.00;C13:Carbamidomethylation:1000.00                           | PEAKS DB  |
| K.N(+.98)PQ(+.98)LQDLDMMLTC(+57.02)VEIKEGALMLPHFNSK.A    | N    | 35.87  | 3373.6067 | 29     | 9.1  | 1687.8259 | 2 | 38.03 | 2        | F2:1999 | OB5940 H1 raw.raw | 2.685E5         | 1        | 1                   | 415   | 443 | Carbamidomethylation | N1:Deamidation (NQ):3.13;Q3:Deamidation (NQ):5.47;C13:Carbamidomethylation:1000.00  | PEAKS DB  |
| T.PGSEVREETS.R.N                                         | Y    | 35.66  | 1245.5948 | 11     | 1.9  | 623.8059  | 2 | 27.69 | 1        | F1:1287 | OB5939 H1 raw.raw | 8.4353E4        | 2        | 2                   | 155   | 165 |                      |                                                                                     | PEAKS DB  |
| K.EGALMLPH(+14.02)FNSK.A                                 | N    | 35.50  | 1356.6860 | 12     | 1.3  | 679.3512  | 2 | 30.49 | 3        | F3:1499 | OB5941 H1 raw.raw | 2.5433E4        | 1        | 1                   | 432   | 443 | Methylation(others)  | H8:Methylation (others):53.53                                                       | PEAKS PTM |
| I.PSGFISYILNRHDNQNL.R.V                                  | N    | 35.49  | 2143.0923 | 18     | 4.0  | 715.3742  | 3 | 33.53 | 1        | F1:1645 | OB5939 H1 raw.raw | 0               | 0        | 0                   | 261   | 278 |                      |                                                                                     | PEAKS DB  |
| R.VLLE(+21.98)ENAGGEQEER.G                               | N    | 35.40  | 1593.7246 | 14     | -0.7 | 797.8690  | 2 | 26.03 | 2        | F2:1239 | OB5940 H1 raw.raw | 1.529E5         | 3        | 3                   | 329   | 342 |                      | E4:Sodium adduct:40.00                                                              | PEAKS PTM |
| K.KGSEEEEDIT(-18.01)N(+.98)PINLR.D                       | N    | 35.32  | 1696.8268 | 15     | 0.0  | 566.6162  | 3 | 29.14 | 1        | F1:1369 | OB5939 H1 raw.raw | 6.926E4         | 1        | 1                   | 379   | 393 |                      | T9:Dehydration:11.50;N10:Deamidation (NQ):25.67                                     | PEAKS PTM |
| K.NP(+15.99)QLQDLMM(+15.99)LTC(+57.02)VEIKEGALMLPHFNSK.A | N    | 35.20  | 3403.6284 | 29     | -3.4 | 851.9115  | 4 | 35.28 | 1        | F1:1792 | OB5939 H1 raw.raw | 1.7685E6        | 1        | 1                   | 415   | 443 | Carbamidomethylation | P2:Hydroxylation Pro:48.46;M10:Oxidation (M):11.06;C13:Carbamidomethylation:1000.00 | PEAKS DB  |
| K.SFNLDDEGH(+15.99)ALRIPSGFISYILNR.H                     | N    | 35.13  | 2634.3555 | 23     | -0.4 | 879.1254  | 3 | 38.33 | 2        | F2:1974 | OB5940 H1 raw.raw | 0               | 0        | 0                   | 249   | 271 | Oxidation (HW)       | H8:Oxidation (HW):1000.00                                                           | PEAKS PTM |

total 247 peptides

| Peptide                                           | Uniq | -10lgP | Mass      | Length | ppm  | m/z      | z | RT    | Fraction | Scan    | Source File       | Area raw peanut | #Feature | #Feature raw peanut | Start | End | PTM                                                    | AScore                                                                     | Found By  |
|---------------------------------------------------|------|--------|-----------|--------|------|----------|---|-------|----------|---------|-------------------|-----------------|----------|---------------------|-------|-----|--------------------------------------------------------|----------------------------------------------------------------------------|-----------|
| K.KGSEEDITN(-17.03)PINLR.D                        | N    | 34.98  | 1696.8268 | 15     | 3.3  | 566.6180 | 3 | 28.85 | 3        | F3:1397 | OB5941 H1 raw.raw | 3.0405E5        | 1        | 1                   | 379   | 393 |                                                        | N10:Ammonia-loss (N):40.63                                                 | PEAKS PTM |
| K.HADADNILVIQQ(-18.01).G                          | N    | 34.95  | 1317.6677 | 12     | -4.9 | 659.8379 | 2 | 29.56 | 3        | F3:1421 | OB5941 H1 raw.raw | 1.0066E5        | 1        | 1                   | 223   | 234 | Dehydration                                            | Q12:Dehydration:76.18                                                      | PEAKS PTM |
| K.GT(-18.01)GNLELVAVRK.E                          | N    | 34.88  | 1237.7142 | 12     | 0.9  | 413.5790 | 3 | 26.41 | 2        | F2:1259 | OB5940 H1 raw.raw | 7.6712E5        | 3        | 3                   | 453   | 464 | Dehydration                                            | T2:Dehydration:1000.00                                                     | PEAKS PTM |
| K.NPQLQLDLM(-48.00)MLTC(+57.02)VEIKEGALMLPHFNSK.A | N    | 34.70  | 3323.6353 | 29     | 8.1  | 831.9229 | 4 | 35.72 | 2        | F2:1816 | OB5940 H1 raw.raw | 1.6745E6        | 2        | 2                   | 415   | 443 | Carbamidomethylation                                   | M9:Dehydration:17.01;C13:Carbamidomethylation:1000.00                      | PEAKS PTM |
| R.IFLAGDKDNVIDQ(+15.00)IEK(+42.01).Q              | N    | 34.39  | 1873.9673 | 16     | -4.1 | 937.9871 | 2 | 31.58 | 2        | F2:1569 | OB5940 H1 raw.raw | 0               | 0        | 0                   | 536   | 551 | Deamidation followed by a methylation; Acetylation (K) | Q13:Deamidation followed by a methylation:72.09; K16:Acetylation (K):97.49 | PEAKS PTM |
| K.HADADN(+.98)ILVIQQGQATVTVAN(+.98)GNNRK.S        | N    | 34.16  | 2748.3792 | 26     | 8.9  | 917.1418 | 3 | 48.01 | 1        | F1:2528 | OB5939 H1 raw.raw | 2.2044E4        | 1        | 1                   | 223   | 248 |                                                        | N6:Deamidation (NQ):10.34; N21:Deamidation (NQ):14.04                      | PEAKS DB  |
| N.PQLQLDMLMLTC(+57.02)VEIKEGALMLPHFNSK.A          | N    | 34.02  | 3257.5957 | 28     | 0.9  | 815.4069 | 4 | 37.83 | 3        | F3:1952 | OB5941 H1 raw.raw | 2.5417E5        | 1        | 1                   | 416   | 443 | Carbamidomethylation                                   | C12:Carbamidomethylation:1000.00                                           | PEAKS DB  |
| R.PNTLVLPK.H                                      | N    | 33.50  | 880.5382  | 8      | 0.4  | 441.2766 | 2 | 27.53 | 2        | F2:1313 | OB5940 H1 raw.raw | 8.6509E4        | 1        | 1                   | 215   | 222 |                                                        |                                                                            | PEAKS DB  |
| R.IFLAGD(-18.01)KDNVIDQIEK.Q                      | N    | 33.20  | 1798.9464 | 16     | -2.5 | 600.6546 | 3 | 31.45 | 2        | F2:1554 | OB5940 H1 raw.raw | 1.217E6         | 1        | 1                   | 536   | 551 |                                                        | D6:Dehydration:31.02                                                       | PEAKS PTM |
| K.G(+43.01)T(+14.02)GNLELVAVRK.E                  | N    | 33.06  | 1312.7462 | 12     | -0.8 | 657.3799 | 2 | 26.85 | 3        | F3:1280 | OB5941 H1 raw.raw | 3.165E5         | 2        | 2                   | 453   | 464 | Carbamylation; Methylation(others)                     | G1:Carbamylation:148.28; T2: Methylation (others):59.30                    | PEAKS PTM |
| R.IPSGFISYILN(+.98)RHDNQNL.R.V                    | N    | 33.06  | 2257.1604 | 19     | 9.2  | 565.3026 | 4 | 35.09 | 3        | F3:1797 | OB5941 H1 raw.raw | 1.752E6         | 1        | 1                   | 260   | 278 |                                                        | N11:Deamidation (NQ):16.76                                                 | PEAKS DB  |

total 247 peptides



| Peptide                                        | Uniq | -10lgP | Mass      | Length | ppm  | m/z       | z | RT    | Fraction | Scan    | Source File       | Area raw peanut | #Feature | #Feature raw peanut | Start | End | PTM                                           | AScore                                                                                   | Found By  |
|------------------------------------------------|------|--------|-----------|--------|------|-----------|---|-------|----------|---------|-------------------|-----------------|----------|---------------------|-------|-----|-----------------------------------------------|------------------------------------------------------------------------------------------|-----------|
| R.REQEWEIEEEEEEGSNREVR.R                       | N    | 33.06  | 2821.1545 | 22     | 3.9  | 941.3958  | 3 | 26.47 | 3        | F3:1247 | OB5941 H1 raw.raw | 1.8551E6        | 1        | 1                   | 472   | 493 |                                               |                                                                                          | PEAKS DB  |
| R.IPSGFISYILN(+.98)R(+14.02)H(+42.01)DNQNL.R.V | N    | 32.77  | 2313.1865 | 19     | 6.8  | 579.3079  | 4 | 33.29 | 1        | F1:1633 | OB5939 H1 raw.raw | 2.3452E7        | 3        | 3                   | 260   | 278 |                                               | N11:Deamidation (N Q):35.13;R12: Methylation(K R):45.25;H13: Acetylation (T SCYH): 27.86 | PEAKS PTM |
| Q.IEARPNTLVLPK.H                               | Y    | 32.24  | 1349.8030 | 12     | 2.2  | 675.9103  | 2 | 30.40 | 1        | F1:1461 | OB5939 H1 raw.raw | 7.0908E5        | 2        | 2                   | 211   | 222 |                                               |                                                                                          | PEAKS DB  |
| K.HADADNILVIQQGQ(+.98)ATVTVANGNN(+.98)RK.S     | N    | 32.00  | 2748.3792 | 26     | 7.7  | 917.1407  | 3 | 55.56 | 2        | F2:2966 | OB5940 H1 raw.raw | 0               | 0        | 0                   | 223   | 248 |                                               | Q14:Deamidation (N Q):19.05;N24: Deamidation (NQ):0.00                                   | PEAKS DB  |
| R.EGEQEW(+15.99)GTPGSEVRETSR.N                 | Y    | 31.83  | 2177.9460 | 19     | 2.6  | 1089.9832 | 2 | 26.55 | 1        | F1:1197 | OB5939 H1 raw.raw | 2.78E4          | 1        | 1                   | 147   | 165 | Oxidation (HW)                                | W6:Oxidation (HW):1000.00                                                                | PEAKS PTM |
| K.AMVIVVNNK(-1.03)GTGNLELVAVR.K                | N    | 31.46  | 2080.1714 | 20     | 4.3  | 1041.0974 | 2 | 33.79 | 2        | F2:1738 | OB5940 H1 raw.raw | 2.5754E7        | 1        | 1                   | 444   | 463 | Lysine oxidation to aminoaldipic semialdehyde | K9:Lysine oxidation to aminoaldipic semialdehyde:1000.00                                 | PEAKS PTM |
| K.HADADNILVIQQGQATVTVANGN(+.98)N(+.98)RK.S     | N    | 31.37  | 2748.3792 | 26     | 5.7  | 917.1389  | 3 | 45.07 | 1        | F1:2318 | OB5939 H1 raw.raw | 5.4428E3        | 1        | 1                   | 223   | 248 |                                               | N23:Deamidation (N Q):0.00;N24: Deamidation (NQ):0.00                                    | PEAKS DB  |
| R.IFLAGDKDNVID.Q                               | N    | 31.18  | 1318.6769 | 12     | 1.8  | 660.3469  | 2 | 31.65 | 1        | F1:1537 | OB5939 H1 raw.raw | 9.3082E4        | 1        | 1                   | 536   | 547 |                                               |                                                                                          | PEAKS DB  |
| R.EREEDWRQPR.E                                 | N    | 31.07  | 1399.6592 | 10     | 0.1  | 467.5604  | 3 | 24.77 | 3        | F3:1154 | OB5941 H1 raw.raw | 2.8345E4        | 1        | 1                   | 118   | 127 |                                               |                                                                                          | PEAKS DB  |
| K.S(-18.01)FNLDEGHALRIPSGFISYILNR.H            | N    | 30.52  | 2600.3499 | 23     | -0.3 | 651.0945  | 4 | 37.85 | 1        | F1:1904 | OB5939 H1 raw.raw | 4.9973E5        | 1        | 1                   | 249   | 271 |                                               | S1:Dehydration:11.12                                                                     | PEAKS PTM |
| R.EGEQEWGT(-18.01)PGSEVRETSR.N                 | Y    | 30.04  | 2143.9407 | 19     | 2.2  | 1072.9800 | 2 | 27.69 | 1        | F1:1293 | OB5939 H1 raw.raw | 4.5095E4        | 1        | 1                   | 147   | 165 |                                               | T8:Dehydration:20.70                                                                     | PEAKS PTM |
| K.SFNLDEGHALRIPS.G                             | N    | 29.93  | 1554.7791 | 14     | -4.8 | 778.3931  | 2 | 30.79 | 2        | F2:1515 | OB5940 H1 raw.raw | 5.213E3         | 1        | 1                   | 249   | 262 |                                               |                                                                                          | PEAKS DB  |

total 247 peptides

| Peptide                                                             | Uniq | -10lgP | Mass      | Length | ppm  | m/z       | z | RT    | Fraction | Scan    | Source File       | Area raw peanut | #Feature | #Feature raw peanut | Start | End | PTM                                    | AScore                                                                                                                                    | Found By  |
|---------------------------------------------------------------------|------|--------|-----------|--------|------|-----------|---|-------|----------|---------|-------------------|-----------------|----------|---------------------|-------|-----|----------------------------------------|-------------------------------------------------------------------------------------------------------------------------------------------|-----------|
| K.HADADNILVIQQGQATVT(-18.01)VANGNNR.K                               | N    | 29.88  | 2600.3054 | 25     | -2.7 | 867.7734  | 3 | 30.76 | 3        | F3:1503 | OB5941 H1 raw.raw | 3.2843E5        | 1        | 1                   | 223   | 247 |                                        | T18:Dehydration:22.85                                                                                                                     | PEAKS PTM |
| K.NPQLQDLDM(-48.00)MLTC(+57.02)VEIK.E                               | N    | 29.75  | 1998.9755 | 17     | -0.6 | 667.3320  | 3 | 34.07 | 2        | F2:1713 | OB5940 H1 raw.raw | 8.006E5         | 1        | 1                   | 415   | 431 | Carbamidomethylation                   | M9:Dehydration:0.00;C13:Carbamidomethylation:1000.00                                                                                      | PEAKS PTM |
| R.EDWRRPSHQPR.K                                                     | N    | 29.71  | 1590.7764 | 12     | -0.3 | 398.7013  | 4 | 24.94 | 3        | F3:1169 | OB5941 H1 raw.raw | 1.2481E4        | 1        | 1                   | 128   | 139 |                                        |                                                                                                                                           | PEAKS DB  |
| R.SSDNEGVIVK(+43.01)VSK(+14.02)EHVQELTK.H                           | N    | 29.63  | 2382.2390 | 21     | 0.9  | 795.0876  | 3 | 28.31 | 3        | F3:1368 | OB5941 H1 raw.raw | 5.0291E4        | 1        | 1                   | 351   | 371 |                                        | K10:Carbamylation:5.08;K13:Methylation(KR):5.08                                                                                           | PEAKS PTM |
| N.NPFYFPSRR.F                                                       | N    | 29.59  | 1182.5934 | 9      | 1.6  | 395.2057  | 3 | 28.08 | 2        | F2:1358 | OB5940 H1 raw.raw | 2.5271E4        | 1        | 1                   | 167   | 175 |                                        |                                                                                                                                           | PEAKS DB  |
| R.IVQIEARPNTLVLP(+15.99)K.H                                         | Y    | 29.48  | 1706.0090 | 15     | 1.6  | 854.0131  | 2 | 29.82 | 1        | F1:1418 | OB5939 H1 raw.raw | 0               | 0        | 0                   | 208   | 222 |                                        | P14:Hydroxylation Pro:43.89                                                                                                               | PEAKS DB  |
| K.N(+.98)PQ(+.98)LQ(+.98)DLDMM(+15.99)LTC(+57.02)VEIKEGALMLPHFNSK.A | N    | 29.44  | 3390.5854 | 29     | 3.7  | 848.6568  | 4 | 38.47 | 3        | F3:1982 | OB5941 H1 raw.raw | 0               | 0        | 0                   | 415   | 443 | Deamidation (NQ); Carbamidomethylation | N1:Deamidation (NQ):62.42; Q3:Deamidation (NQ):65.92; Q5:Deamidation (NQ):60.92; M10:Oxidation (M):12.28;C13:Carbamidomethylation:1000.00 | PEAKS DB  |
| K.HADADNILVIQQGQATVTVANGNNR(+14.02)K(+43.99).S                      | N    | 29.12  | 2804.4165 | 26     | -3.2 | 1403.2111 | 2 | 29.38 | 3        | F3:1435 | OB5941 H1 raw.raw | 2.4694E5        | 1        | 1                   | 223   | 248 | Methylation(KR)                        | R25:Methylation(KR):1000.00;K26:Carboxylation(DKW):41.02                                                                                  | PEAKS PTM |
| R.EQEW(+15.99)EEEEEEEEEGSNR.E                                       | N    | 29.12  | 2296.8362 | 18     | 4.4  | 1149.4304 | 2 | 27.05 | 1        | F1:1252 | OB5939 H1 raw.raw | 0               | 0        | 0                   | 473   | 490 | Oxidation (HW)                         | W4:Oxidation (HW):1000.00                                                                                                                 | PEAKS PTM |

total 247 peptides

| Peptide                                                             | Uniq | -10lgP | Mass      | Length | ppm  | m/z       | z | RT    | Fraction | Scan    | Source File       | Area raw peanut | #Feature | #Feature raw peanut | Start | End | PTM                                    | AScore                                                                                                                                    | Found By  |
|---------------------------------------------------------------------|------|--------|-----------|--------|------|-----------|---|-------|----------|---------|-------------------|-----------------|----------|---------------------|-------|-----|----------------------------------------|-------------------------------------------------------------------------------------------------------------------------------------------|-----------|
| K.HADADNILVIQQGQAT(-18.01)VTVANGNNR.K                               | N    | 29.07  | 2600.3054 | 25     | -1.0 | 867.7748  | 3 | 30.11 | 2        | F2:1479 | OB5940 H1 raw.raw | 0               | 0        | 0                   | 223   | 247 |                                        | T16:Dehydration:0.00                                                                                                                      | PEAKS PTM |
| R.E(-18.01)QEWEEEEEEEEEGSNREVR.R.Y                                  | N    | 28.92  | 2803.1440 | 22     | 2.8  | 935.3912  | 3 | 28.31 | 3        | F3:1363 | OB5941 H1 raw.raw | 2.9497E4        | 1        | 1                   | 473   | 494 | Pyro-glu from E                        | E1:Pyro-glu from E:100.00                                                                                                                 | PEAKS PTM |
| K.KN(+.98)P(+15.99)Q(+.98)LQ(+.98)DLDMLTLC(+57.02)VEIKEGALMLPHFSK.A | N    | 28.66  | 3518.6804 | 30     | -5.1 | 880.6729  | 4 | 37.59 | 1        | F1:1890 | OB5939 H1 raw.raw | 0               | 0        | 0                   | 414   | 443 | Deamidation (NQ); Carbamidomethylation | N2:Deamidation (NQ):55.07;P3:Hydroxylation Pro:43.60;Q4:Deamidation (NQ):57.68;Q6:Deamidation (NQ):58.78;C14:Carbamidomethylation:1000.00 | PEAKS DB  |
| K.H(+42.01)(+15.99)ADADNILVIQQGQATVTVAN(+.98)GNNRK.S                | N    | 28.60  | 2805.4006 | 26     | 9.3  | 1403.7207 | 2 | 30.57 | 1        | F1:1450 | OB5939 H1 raw.raw | 9.6068E4        | 1        | 1                   | 223   | 248 | Acetylation (N-term); Oxidation (HW)   | H1:Acetylation (N-term):1000.00;H1:Oxidation (HW):1000.00;N21:Deamidation (NQ):14.04                                                      | PEAKS PTM |
| R.NTLEAAFAFNEIRRVLLEENAGGEQEER.G                                    | N    | 28.52  | 3447.6653 | 30     | -1.2 | 1150.2277 | 3 | 38.03 | 2        | F2:1966 | OB5940 H1 raw.raw | 1.3831E5        | 1        | 1                   | 313   | 342 |                                        |                                                                                                                                           | PEAKS DB  |
| R.ESHFVSARPSQSP(+15.99)SSP(+15.99)EKEDQEEEN.Q                       | N    | 28.43  | 2989.2808 | 26     | 0.3  | 997.4344  | 3 | 24.81 | 3        | F3:1156 | OB5941 H1 raw.raw | 0               | 0        | 0                   | 574   | 599 |                                        | P14:Hydroxylation Pro:17.91;P17:Hydroxylation Pro:28.14                                                                                   | PEAKS DB  |
| K.NPQLQDLDMM(+15.99)LTC(+58.01)VEIK.E                               | N    | 28.36  | 2063.9578 | 17     | -3.4 | 1032.9827 | 2 | 37.19 | 1        | F1:1881 | OB5939 H1 raw.raw | 2.5393E4        | 1        | 1                   | 415   | 431 | Carboxymethyl                          | M10:Oxidation (M):8.69;C13:Carboxymethylation:1000.00                                                                                     | PEAKS PTM |
| K.DLAFPGSGEQVEK(+14.02)LIK(+43.01).N                                | N    | 28.34  | 1786.9464 | 16     | -3.8 | 894.4771  | 2 | 32.91 | 3        | F3:1654 | OB5941 H1 raw.raw | 6.9695E5        | 1        | 1                   | 555   | 570 |                                        | K13:Methylation (KR):4.52;K16:Carbamylation:4.52                                                                                          | PEAKS PTM |
| total 247 peptides                                                  |      |        |           |        |      |           |   |       |          |         |                   |                 |          |                     |       |     |                                        |                                                                                                                                           |           |

| Peptide                                                 | Uniq | -10lgP | Mass      | Length | ppm  | m/z       | z | RT    | Fraction | Scan    | Source File       | Area raw peanut | #Feature | #Feature raw peanut | Start | End | PTM                  | AScore                                                                               | Found By  |
|---------------------------------------------------------|------|--------|-----------|--------|------|-----------|---|-------|----------|---------|-------------------|-----------------|----------|---------------------|-------|-----|----------------------|--------------------------------------------------------------------------------------|-----------|
| K.KN(+.98)PQ(+.98)LQDLDMMLTC(+57.02)VEIKEGALMLPHFNSK.A  | N    | 28.34  | 3501.7017 | 30     | 6.9  | 1168.2493 | 3 | 36.92 | 1        | F1:1845 | OB5939 H1 raw.raw | 2.5153E5        | 1        | 1                   | 414   | 443 | Carbamidomethylation | N2:Deamidation (NQ): 0.00;Q4:Deamidation (NQ): 0.00;C14:Carbamidomethylation:1000.00 | PEAKS DB  |
| K.N(+.98)PQLQDLDM(+15.99)MLTC(+57.02)VEIKEGALMLPHFNSK.A | N    | 27.69  | 3388.6174 | 29     | 8.6  | 1130.5562 | 3 | 39.33 | 3        | F3:2085 | OB5941 H1 raw.raw | 8.4125E5        | 1        | 1                   | 415   | 443 | Carbamidomethylation | N1:Deamidation (NQ): 0.00;M9:Oxidation (M):0.00;C13:Carbamidomethylation:1000.00     | PEAKS DB  |
| R.SKQ(+.98)FQN(+.98)LQ(+.98)NHR.I                       | Y    | 27.06  | 1401.6637 | 11     | 2.0  | 468.2294  | 3 | 24.91 | 1        | F1:1129 | OB5939 H1 raw.raw | 2.0347E3        | 1        | 1                   | 197   | 207 |                      | Q3:Deamidation (NQ): 14.04;N6:Deamidation (NQ): 11.06;Q8:Deamidation (NQ): 16.66     | PEAKS DB  |
| K.SFNLD(+53.92)EGHALR.I                                 | N    | 26.85  | 1311.5294 | 11     | -0.8 | 438.1834  | 3 | 27.41 | 2        | F2:1311 | OB5940 H1 raw.raw | 0               | 0        | 0                   | 249   | 259 |                      | D5:Replacement of 2 protons by iron: 20.92                                           | PEAKS PTM |
| total 247 peptides                                      |      |        |           |        |      |           |   |       |          |         |                   |                 |          |                     |       |     |                      |                                                                                      |           |

tr|E5G076|E5G076\_ARAHY

[back to list](#)

| [Protein Coverage](#) | [Supporting Peptides](#) |

Protein Coverage:

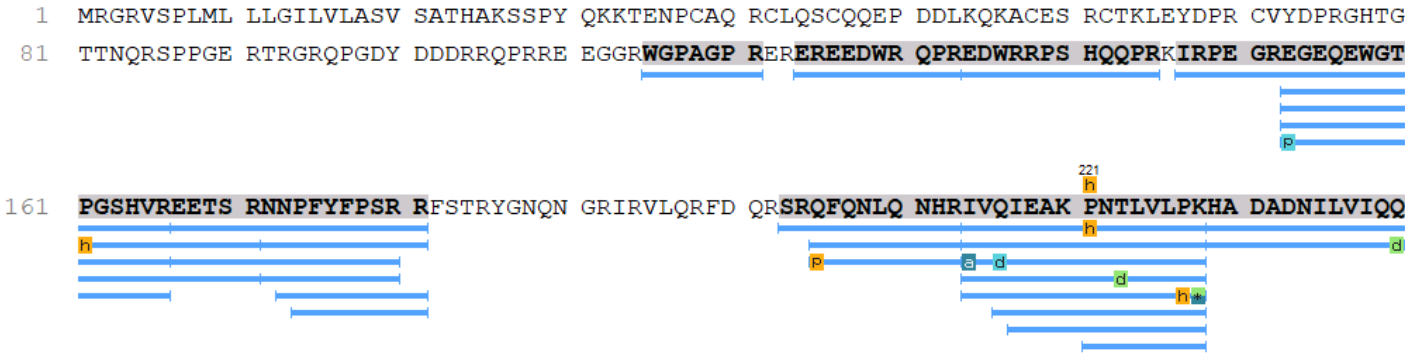

- Acetylation (N-term) (+42.01)
- Carbamidomethylation (+57.02)
- Carbamylation (+43.01)
- Carboxymethyl (+58.01)
- Carboxymethyl (KW, X@N-term) (+58.01)
- Deamidation (NQ) (+0.98)
- Dehydration (-18.01)
- Deamidation followed by a methylation (+15.00)
- Dethiomethyl (-48.00)
- Hydroxylation Pro (+15.99)
- Methylation(KR) (+14.02)
- Methylation(others) (+14.02)
- Oxidation (M) (+15.99)
- Oxidation (HW) (+15.99)
- Pyro-glu from E (-18.01)
- Pyro-glu from Q (-17.03)
- Amidation (-0.98), Acetylation (K) (+42.01)
- Carbamylation (+43.01), Methylation(KR) (+14.02)

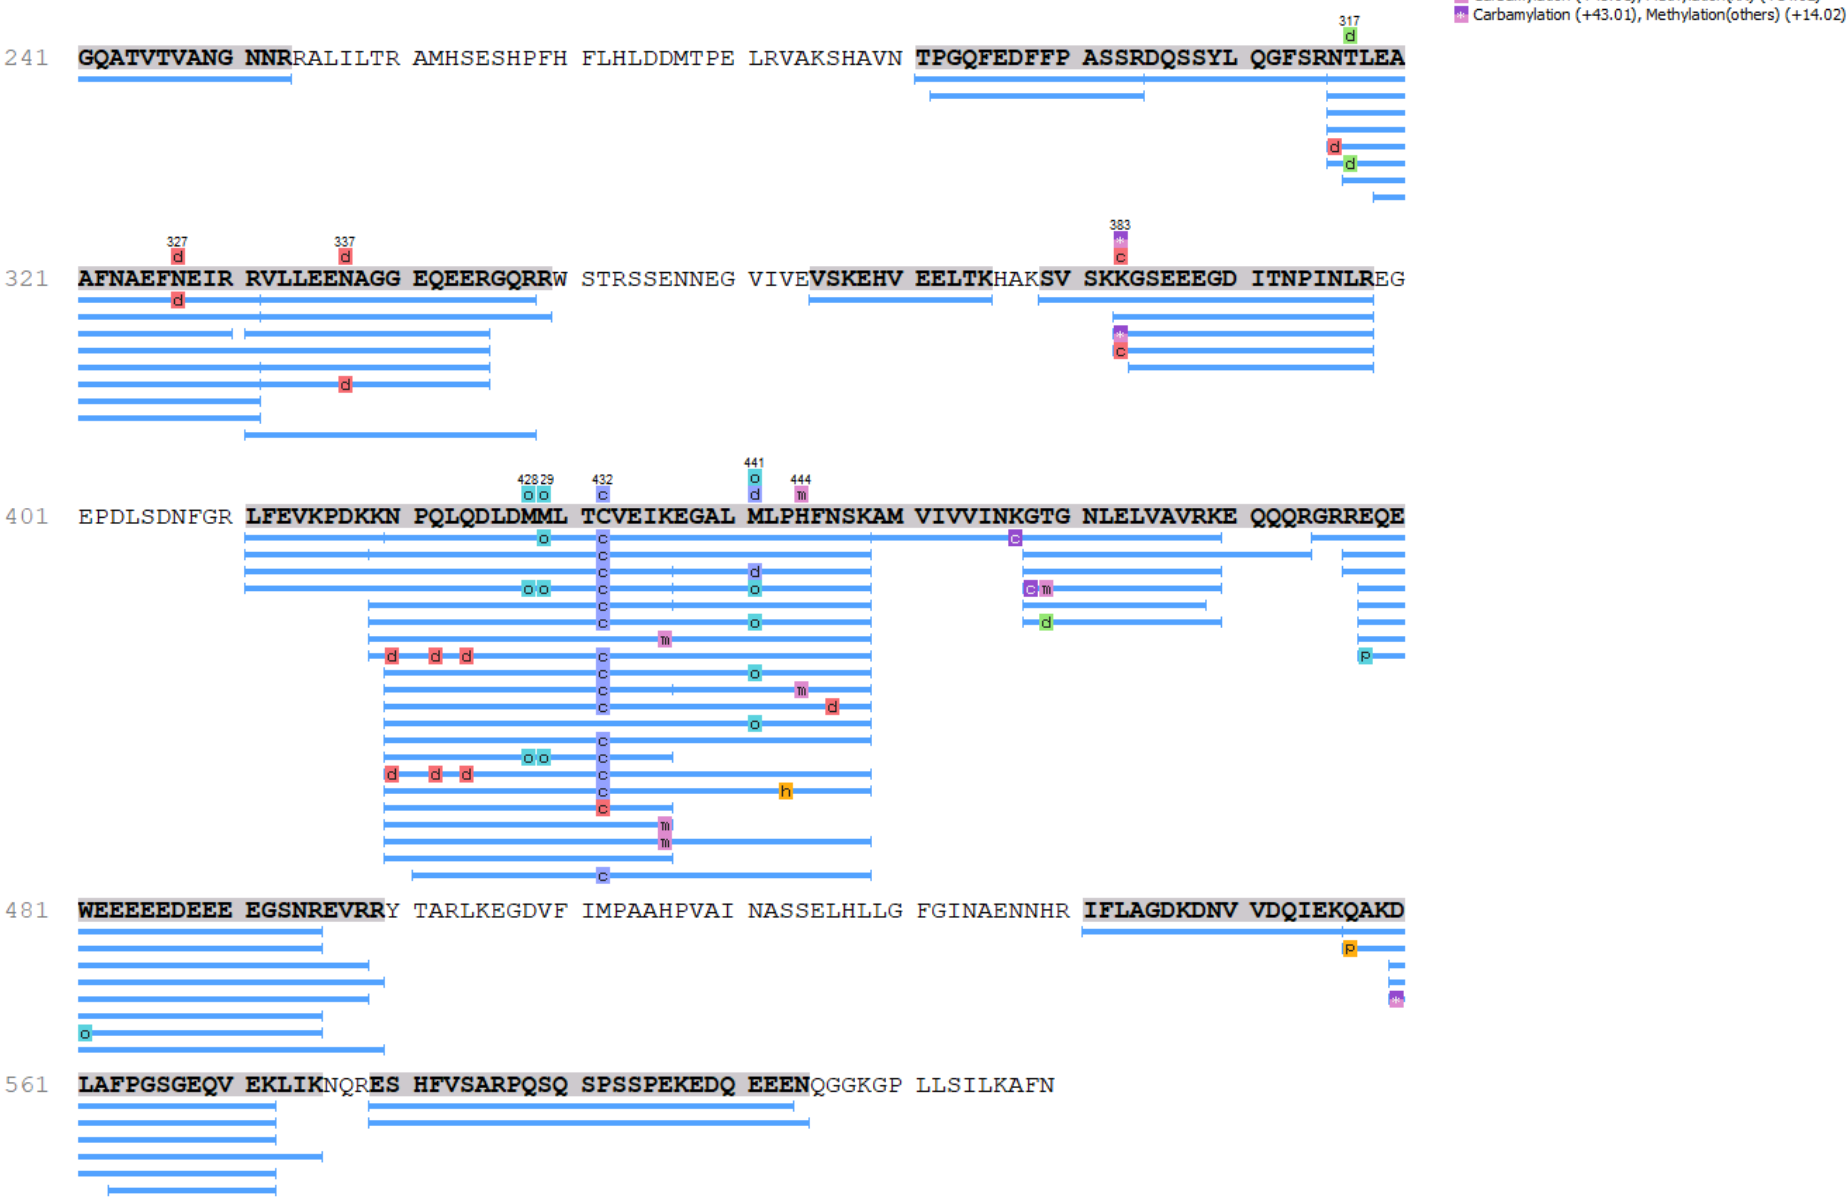

Supporting Peptides:

| Peptide | Uniq | -10lgP | Mass | Length | ppm | m/z | z | RT | Fraction | Scan | Source File | Area raw peanut | #Feature | #Feature raw peanut | Start | End | PTM | AScore | Found By |
|---------|------|--------|------|--------|-----|-----|---|----|----------|------|-------------|-----------------|----------|---------------------|-------|-----|-----|--------|----------|
|---------|------|--------|------|--------|-----|-----|---|----|----------|------|-------------|-----------------|----------|---------------------|-------|-----|-----|--------|----------|

total 145 peptides

| Peptide                                   | Uniq | -10lgP | Mass      | Length | ppm  | m/z       | z | RT    | Fraction | Scan    | Source File       | Area raw peanut | #Feature | #Feature raw peanut | Start | End | PTM                  | AScore                                                 | Found By  |
|-------------------------------------------|------|--------|-----------|--------|------|-----------|---|-------|----------|---------|-------------------|-----------------|----------|---------------------|-------|-----|----------------------|--------------------------------------------------------|-----------|
| K.NPQLQDLDMMLTC(+57.02)VEIK.E             | N    | 120.22 | 2046.9788 | 17     | -6.3 | 1024.4902 | 2 | 37.10 | 1        | F1:1864 | OB5939 H1 raw.raw | 1.3638E7        | 5        | 5                   | 420   | 436 | Carbamidomethylation | C13:Carbamidomethylation:1000.00                       | PEAKS DB  |
| K.KNPQLQDLDMMLTC(+57.02)VEIK.E            | N    | 118.64 | 2175.0737 | 18     | -1.1 | 1088.5430 | 2 | 34.52 | 2        | F2:1751 | OB5940 H1 raw.raw | 4.131E6         | 3        | 3                   | 419   | 436 | Carbamidomethylation | C14:Carbamidomethylation:1000.00                       | PEAKS DB  |
| R.EQEWEEEEDEEEEGSNR.E                     | N    | 117.85 | 2280.8413 | 18     | 4.3  | 1141.4329 | 2 | 28.23 | 1        | F1:1323 | OB5939 H1 raw.raw | 4.2916E6        | 3        | 3                   | 478   | 495 |                      |                                                        | PEAKS DB  |
| R.NTLEAAFNAAFNEIR.R                       | N    | 114.83 | 1737.8322 | 15     | -0.4 | 869.9230  | 2 | 34.89 | 2        | F2:1770 | OB5940 H1 raw.raw | 1.3513E7        | 6        | 6                   | 316   | 330 |                      |                                                        | PEAKS DB  |
| K.HADADNILVIQQGQATVTVANGNNR.R             | N    | 111.11 | 2618.3162 | 25     | 5.0  | 1310.1719 | 2 | 30.00 | 2        | F2:1473 | OB5940 H1 raw.raw | 6.2545E6        | 3        | 3                   | 229   | 253 |                      |                                                        | PEAKS DB  |
| K.NPQLQDLDM(+15.99)MLTC(+57.02)VEIK.E     | N    | 110.46 | 2062.9736 | 17     | -5.3 | 1032.4886 | 2 | 36.07 | 2        | F2:1840 | OB5940 H1 raw.raw | 3.4606E5        | 2        | 2                   | 420   | 436 | Carbamidomethylation | M9:Oxidation(M):30.46;C13:Carbamidomethylation:1000.00 | PEAKS DB  |
| K.KGSEEEGDITNPINLR.E                      | N    | 104.81 | 1770.8748 | 16     | 3.1  | 886.4474  | 2 | 28.08 | 2        | F2:1364 | OB5940 H1 raw.raw | 2.2478E7        | 7        | 7                   | 383   | 398 |                      |                                                        | PEAKS DB  |
| R.VLLEENAGGEQEER.G                        | N    | 97.22  | 1571.7427 | 14     | 2.5  | 786.8806  | 2 | 26.75 | 1        | F1:1224 | OB5939 H1 raw.raw | 1.2414E7        | 3        | 3                   | 332   | 345 |                      |                                                        | PEAKS DB  |
| R.DQSSYLQGFNR.N                           | N    | 97.09  | 1286.5891 | 11     | -3.0 | 644.2999  | 2 | 30.18 | 2        | F2:1484 | OB5940 H1 raw.raw | 6.1544E7        | 13       | 13                  | 305   | 315 |                      |                                                        | PEAKS DB  |
| R.RVLEENAGGEQEER.G                        | N    | 93.51  | 1727.8438 | 15     | 0.4  | 576.9554  | 3 | 24.77 | 2        | F2:1156 | OB5940 H1 raw.raw | 1.346E5         | 5        | 5                   | 331   | 345 |                      |                                                        | PEAKS DB  |
| K.NPQLQDLDMMLTC(+57.02)VEIKEGALMLPHFNSK.A | N    | 92.80  | 3371.6387 | 29     | -2.9 | 1686.8218 | 2 | 37.92 | 1        | F1:1910 | OB5939 H1 raw.raw | 1.8404E8        | 11       | 11                  | 420   | 448 | Carbamidomethylation | C13:Carbamidomethylation:1000.00                       | PEAKS DB  |
| K.GSEEEGDITNPINLR.E                       | N    | 92.57  | 1642.7798 | 15     | -1.0 | 822.3964  | 2 | 30.18 | 2        | F2:1508 | OB5940 H1 raw.raw | 9.2673E6        | 3        | 3                   | 384   | 398 |                      |                                                        | PEAKS DB  |
| K.NPQLQDLDMMLTC(+14.02)VEIK.E             | N    | 88.98  | 2003.9730 | 17     | -4.9 | 1002.9888 | 2 | 37.72 | 2        | F2:1938 | OB5940 H1 raw.raw | 6.7012E5        | 2        | 2                   | 420   | 436 |                      | C13:Methylation(thers):33.98                           | PEAKS PTM |
| R.EGEQEWGTPGSHVR.E                        | N    | 87.00  | 1567.7015 | 14     | 0.5  | 784.8585  | 2 | 25.51 | 3        | F3:1193 | OB5941 H1 raw.raw | 5.178E5         | 6        | 6                   | 153   | 166 |                      |                                                        | PEAKS DB  |
| R.NTLEAAFNAAFNEIRR.V                      | N    | 86.44  | 1893.9332 | 16     | -3.6 | 947.9705  | 2 | 35.28 | 1        | F1:1741 | OB5939 H1 raw.raw | 3.2153E8        | 22       | 22                  | 316   | 331 |                      |                                                        | PEAKS DB  |
| K.DLAFPGSGEQVEK.L                         | N    | 85.12  | 1375.6619 | 13     | 1.9  | 688.8395  | 2 | 29.66 | 2        | F2:1451 | OB5940 H1 raw.raw | 6.5078E7        | 3        | 3                   | 560   | 572 |                      |                                                        | PEAKS DB  |

total 145 peptides

| Peptide                                           | Uniq | -10lgP | Mass      | Length | ppm  | m/z       | z | RT    | Fraction | Scan    | Source File       | Area raw peanut | #Feature | #Feature raw peanut | Start | End | PTM                  | AScore                                                                                  | Found By     |
|---------------------------------------------------|------|--------|-----------|--------|------|-----------|---|-------|----------|---------|-------------------|-----------------|----------|---------------------|-------|-----|----------------------|-----------------------------------------------------------------------------------------|--------------|
| K.NPQLQDLDM(-48.00)LTC(+57.02)VEIK.E              | N    | 85.01  | 1998.9755 | 17     | 0.5  | 1000.4955 | 2 | 32.73 | 1        | F1:1599 | OB5939 H1 raw.raw | 1.7365E7        | 6        | 6                   | 420   | 436 | Carbamidomethylation | M10:De<br>thiomet<br>hyl:27.<br>96;C1<br>3:Carb<br>amido<br>methyl<br>ation:1<br>000.00 | PEAKS<br>PTM |
| R.VLLEENAGGEQEERGQR.R                             | N    | 84.92  | 1912.9238 | 17     | 1.8  | 957.4709  | 2 | 25.31 | 3        | F3:1182 | OB5941 H1 raw.raw | 1.9929E6        | 6        | 6                   | 332   | 348 |                      |                                                                                         | PEAKS<br>DB  |
| K.KNPQLQDLDM(+15.99)LTC(+57.02)VEIKEGALMLPHFNSK.A | N    | 84.57  | 3515.7285 | 30     | -2.7 | 879.9370  | 4 | 34.52 | 2        | F2:1755 | OB5940 H1 raw.raw | 2.6704E6        | 3        | 3                   | 419   | 448 | Carbamidomethylation | M11:Ox<br>idation<br>(M):30.<br>46;C1<br>4:Carb<br>amido<br>methyl<br>ation:1<br>000.00 | PEAKS<br>DB  |
| K.SVSKKGSEEEGDITNPINLR.E                          | N    | 83.99  | 2172.1023 | 20     | 0.7  | 725.0419  | 3 | 27.21 | 3        | F3:1286 | OB5941 H1 raw.raw | 1.3763E5        | 2        | 2                   | 379   | 398 |                      |                                                                                         | PEAKS<br>DB  |
| K.HADADNILVIQGGQATVTVAN(+.98)GNNR.R               | N    | 82.15  | 2619.3000 | 25     | -1.2 | 1310.6558 | 2 | 30.35 | 2        | F2:1535 | OB5940 H1 raw.raw | 5.2956E6        | 1        | 1                   | 229   | 253 |                      | N21:De<br>amidati<br>on (N<br>Q):7.32                                                   | PEAKS<br>DB  |
| K.KNPQLQDLDM(+15.99)LTC(+57.02)VEIK.E             | N    | 81.97  | 2191.0686 | 18     | 0.5  | 1096.5421 | 2 | 32.43 | 2        | F2:1621 | OB5940 H1 raw.raw | 1.9806E5        | 1        | 1                   | 419   | 436 | Carbamidomethylation | M11:Ox<br>idation<br>(M):9.3<br>4;C14:<br>Carbam<br>idomet<br>hylation:1000.<br>00      | PEAKS<br>DB  |
| K.EGALMLPHFNSK.A                                  | N    | 81.44  | 1342.6703 | 12     | 4.0  | 672.3451  | 2 | 30.40 | 1        | F1:1456 | OB5939 H1 raw.raw | 9.7706E6        | 3        | 3                   | 437   | 448 |                      |                                                                                         | PEAKS<br>DB  |
| K.QAKDLAFPGSGEQVEK.L                              | N    | 81.31  | 1702.8525 | 16     | 1.8  | 852.4351  | 2 | 26.85 | 3        | F3:1278 | OB5941 H1 raw.raw | 1.3516E6        | 7        | 7                   | 557   | 572 |                      |                                                                                         | PEAKS<br>DB  |
| K.KNPQLQDLDM(+15.99)MLTC(+57.02)VEIK.E            | N    | 77.76  | 2191.0686 | 18     | 0.6  | 1096.5422 | 2 | 33.03 | 1        | F1:1615 | OB5939 H1 raw.raw | 0               | 0        | 0                   | 419   | 436 | Carbamidomethylation | M10:Ox<br>idation<br>(M):14.<br>02;C1<br>4:Carb<br>amido<br>methyl<br>ation:1<br>000.00 | PEAKS<br>DB  |
| R.GRREQEWEEEEEEEEGSNR.E                           | N    | 77.42  | 2650.0649 | 21     | 0.3  | 884.3625  | 3 | 25.64 | 2        | F2:1205 | OB5940 H1 raw.raw | 2.3251E6        | 7        | 7                   | 475   | 495 |                      |                                                                                         | PEAKS<br>DB  |
| R.IVQIEAKPNTLVLPK.H                               | N    | 76.21  | 1662.0079 | 15     | 5.0  | 832.0154  | 2 | 29.90 | 2        | F2:1463 | OB5940 H1 raw.raw | 3.0833E8        | 29       | 29                  | 214   | 228 |                      |                                                                                         | PEAKS<br>DB  |

total 145 peptides

| Peptide                                            | Uniq | -10lgP | Mass      | Length | ppm  | m/z       | z | RT    | Fraction | Scan    | Source File       | Area raw peanut | #Feature | #Feature raw peanut | Start | End | PTM                                 | AScore                                                    | Found By |
|----------------------------------------------------|------|--------|-----------|--------|------|-----------|---|-------|----------|---------|-------------------|-----------------|----------|---------------------|-------|-----|-------------------------------------|-----------------------------------------------------------|----------|
| K.NPQLQDLDM(+15.99)MLTC(+57.02)VEIKEGALMLPHFNSK.A  | N    | 75.51  | 3387.6335 | 29     | -1.5 | 1130.2168 | 3 | 36.17 | 3        | F3:1926 | OB5941 H1 raw.raw | 2.5418E7        | 3        | 3                   | 420   | 448 | Carbamidomethylation                | M9:Oxidation (M):10.11;C13:Carbamidomethylation:1000.00   | PEAKS DB |
| K.EGALM(+15.99)LPHFNSK.A                           | N    | 74.93  | 1358.6653 | 12     | 2.1  | 680.3414  | 2 | 29.74 | 3        | F3:1443 | OB5941 H1 raw.raw | 2.0704E6        | 3        | 3                   | 437   | 448 | Oxidation (M)                       | M5:Oxidation (M):1000.00                                  | PEAKS DB |
| R.LFEVKPKDKKNPQLQDLDMMLTC(+57.02)VEIK.E            | N    | 74.78  | 3131.6069 | 26     | 3.7  | 1044.8801 | 3 | 33.97 | 2        | F2:1716 | OB5940 H1 raw.raw | 3.7773E6        | 3        | 3                   | 411   | 436 | Carbamidomethylation                | C22:Carbamidomethylation:1000.00                          | PEAKS DB |
| K.KNPQLQDLDMMLTC(+57.02)VEIKEGALM(+15.99)LPHFNSK.A | N    | 74.26  | 3515.7285 | 30     | -0.8 | 879.9387  | 4 | 35.84 | 1        | F1:1790 | OB5939 H1 raw.raw | 5.1448E6        | 2        | 2                   | 419   | 448 | Carbamidomethylation; Oxidation (M) | C14:Carbamidomethylation:1000.00; M23:Oxidation (M):69.38 | PEAKS DB |
| K.GTGNLELVAVRK.E                                   | N    | 73.67  | 1255.7249 | 12     | 0.9  | 628.8702  | 2 | 26.85 | 3        | F3:1263 | OB5941 H1 raw.raw | 1.0553E7        | 7        | 7                   | 458   | 469 |                                     |                                                           | PEAKS DB |
| K.NPQLQDLDM(+15.99)LTC(+57.02)VEIKEGALMLPHFNSK.A   | N    | 72.71  | 3387.6335 | 29     | 3.8  | 1130.2228 | 3 | 37.84 | 2        | F2:1902 | OB5940 H1 raw.raw | 8.789E6         | 3        | 3                   | 420   | 448 | Carbamidomethylation                | M10:Oxidation (M):14.02;C13:Carbamidomethylation:1000.00  | PEAKS DB |
| K.GTGNLELVAVR.K                                    | N    | 71.83  | 1127.6299 | 11     | 0.2  | 564.8223  | 2 | 29.32 | 2        | F2:1429 | OB5940 H1 raw.raw | 1.0095E7        | 3        | 3                   | 458   | 468 |                                     |                                                           | PEAKS DB |
| R.NNPFFPSR.R                                       | N    | 71.25  | 1140.5352 | 9      | 0.9  | 571.2754  | 2 | 30.89 | 2        | F2:1528 | OB5940 H1 raw.raw | 1.2382E7        | 4        | 4                   | 172   | 180 |                                     |                                                           | PEAKS DB |
| R.VLLEENAGGEQEERGQRR.W                             | N    | 71.19  | 2069.0249 | 18     | 2.1  | 690.6837  | 3 | 25.31 | 3        | F3:1186 | OB5941 H1 raw.raw | 1.1654E6        | 2        | 2                   | 332   | 349 |                                     |                                                           | PEAKS DB |
| R.EETSRNNPFYFPSRR.F                                | N    | 69.88  | 1898.9023 | 15     | 1.2  | 633.9755  | 3 | 27.17 | 2        | F2:1289 | OB5940 H1 raw.raw | 7.2799E6        | 5        | 5                   | 167   | 181 |                                     |                                                           | PEAKS DB |
| K.NPQLQDLDMMLTC(+57.02)VEIKEGALM(+15.99)LPHFNSK.A  | N    | 69.58  | 3387.6335 | 29     | -9.3 | 1130.2080 | 3 | 36.62 | 2        | F2:1874 | OB5940 H1 raw.raw | 2.6984E7        | 4        | 4                   | 420   | 448 | Carbamidomethylation; Oxidation (M) | C13:Carbamidomethylation:1000.00; M22:Oxidation (M):69.89 | PEAKS DB |
| R.REQEWEIEEEEEEGSNR.E                              | N    | 68.88  | 2436.9424 | 19     | 2.8  | 1219.4819 | 2 | 26.47 | 3        | F3:1258 | OB5941 H1 raw.raw | 3.0427E4        | 2        | 2                   | 477   | 495 |                                     |                                                           | PEAKS DB |

total 145 peptides



| Peptide                                                 | Uniq | -10lgP | Mass      | Length | ppm  | m/z       | z | RT    | Fraction | Scan    | Source File       | Area raw peanut | #Feature | #Feature raw peanut | Start | End | PTM                                 | AScore                                                                            | Found By  |
|---------------------------------------------------------|------|--------|-----------|--------|------|-----------|---|-------|----------|---------|-------------------|-----------------|----------|---------------------|-------|-----|-------------------------------------|-----------------------------------------------------------------------------------|-----------|
| R.NTLEAAFNAEFN(+.98)EIRR.V                              | N    | 68.73  | 1894.9172 | 16     | -3.7 | 948.4624  | 2 | 32.73 | 3        | F3:1640 | OB5941 H1 raw.raw | 4.5098E6        | 3        | 3                   | 316   | 331 | Deamidation (NQ)                    | N12:Deamidation (NQ):55.21                                                        | PEAKS DB  |
| R.N(+.98)TLEAAFNAEFNEIRR.V                              | N    | 67.69  | 1894.9172 | 16     | 2.2  | 948.4680  | 2 | 35.88 | 1        | F1:1787 | OB5939 H1 raw.raw | 6.2604E7        | 1        | 1                   | 316   | 331 | Deamidation (NQ)                    | N1:Deamidation (NQ):61.82                                                         | PEAKS DB  |
| R.NNPFYFSPRR.F                                          | N    | 67.53  | 1296.6364 | 10     | 1.5  | 649.3264  | 2 | 28.95 | 1        | F1:1356 | OB5939 H1 raw.raw | 1.2601E8        | 9        | 9                   | 172   | 181 |                                     |                                                                                   | PEAKS DB  |
| K.KNPQLQDLDM(+15.99)MLTC(+57.02)VEIKEGALMLPHFNSK.A      | N    | 66.89  | 3515.7285 | 30     | -3.1 | 879.9366  | 4 | 35.44 | 2        | F2:1830 | OB5940 H1 raw.raw | 7.3362E6        | 2        | 2                   | 419   | 448 | Carbamidomethylation                | M10:Oxidation (M):11.06;C14:Carbamidomethylation:1000.00                          | PEAKS DB  |
| K.KNPQLQDLDMMLTC(+57.02)VEIKEGALMLPHFNSK.A              | N    | 66.20  | 3499.7336 | 30     | -0.1 | 875.9406  | 4 | 36.52 | 3        | F3:1868 | OB5941 H1 raw.raw | 1.1425E7        | 3        | 3                   | 419   | 448 | Carbamidomethylation                | C14:Carbamidomethylation:1000.00                                                  | PEAKS DB  |
| R.VLLEEN(+.98)AGGEQEER.G                                | N    | 66.02  | 1572.7267 | 14     | -3.7 | 787.3677  | 2 | 26.82 | 2        | F2:1276 | OB5940 H1 raw.raw | 0               | 0        | 0                   | 332   | 345 | Deamidation (NQ)                    | N6:Deamidation (NQ):71.64                                                         | PEAKS DB  |
| R.Q(-17.03)FQNLQNHR.I                                   | N    | 65.38  | 1166.5581 | 9      | 2.4  | 584.2877  | 2 | 28.05 | 1        | F1:1306 | OB5939 H1 raw.raw | 3.4214E6        | 3        | 3                   | 205   | 213 | Pyro-glu from Q                     | Q1:Pyro-glu from Q:1000.00                                                        | PEAKS PTM |
| K.NPQLQDLDMMLTCVEIK(+14.02)EGALMLPHFNSK.A               | N    | 64.78  | 3328.6328 | 29     | 1.8  | 1110.5536 | 3 | 38.03 | 2        | F2:1959 | OB5940 H1 raw.raw | 1.6164E7        | 6        | 6                   | 420   | 448 | Methylation(KR)                     | K17:Methylation(KR):77.78                                                         | PEAKS PTM |
| E.VSKEHVEELTK.H                                         | N    | 64.44  | 1297.6877 | 11     | 0.8  | 433.5702  | 3 | 24.82 | 1        | F1:1120 | OB5939 H1 raw.raw | 1.1352E5        | 6        | 6                   | 365   | 375 |                                     |                                                                                   | PEAKS DB  |
| R.EETSRNNPFYFSPSR.R                                     | N    | 63.62  | 1742.8011 | 14     | -0.9 | 581.9405  | 3 | 29.89 | 1        | F1:1419 | OB5939 H1 raw.raw | 6.2933E4        | 1        | 1                   | 167   | 180 |                                     |                                                                                   | PEAKS DB  |
| A.FPGSGEQVEK.L                                          | N    | 61.40  | 1076.5138 | 10     | 5.5  | 539.2672  | 2 | 30.23 | 1        | F1:1449 | OB5939 H1 raw.raw | 6.3559E4        | 1        | 1                   | 563   | 572 |                                     |                                                                                   | PEAKS DB  |
| K.NPQLQ(+.98)DLDMMLTC(+57.02)VEIKEGALM(+15.99)LPHFNSK.A | N    | 60.12  | 3388.6174 | 29     | -2.4 | 1130.5437 | 3 | 36.35 | 2        | F2:1874 | OB5940 H1 raw.raw | 6.4476E5        | 1        | 1                   | 420   | 448 | Carbamidomethylation; Oxidation (M) | Q5:Deamidation (NQ):9.86;C13:Carbamidomethylation:1000.00;M22:Oxidation (M):54.40 | PEAKS DB  |

total 145 peptides

| Peptide                                                   | Uniq | -10lgP | Mass      | Length | ppm  | m/z       | z | RT    | Fraction | Scan    | Source File       | Area raw peanut | #Feature | #Feature raw peanut | Start | End | PTM                                 | AScore                                                                           | Found By |
|-----------------------------------------------------------|------|--------|-----------|--------|------|-----------|---|-------|----------|---------|-------------------|-----------------|----------|---------------------|-------|-----|-------------------------------------|----------------------------------------------------------------------------------|----------|
| K.NPQLQDLDM(+15.99)M(+15.99)LTC(+57.02)VEIKEGALMLPHFNSK.A | N    | 60.05  | 3403.6284 | 29     | -4.3 | 1135.5452 | 3 | 35.63 | 3        | F3:1818 | OB5941 H1 raw.raw | 7.9921E5        | 1        | 1                   | 420   | 448 | Oxidation (M); Carbamidomethylation | M9:Oxidation (M):49.25;M10:Oxidation (M):53.09;C13:Carbamidomethylation:1000.00  | PEAKS DB |
| R.SRQFQNLQNH.R                                            | N    | 59.95  | 1426.7178 | 11     | 1.0  | 476.5803  | 3 | 24.41 | 2        | F2:1135 | OB5940 H1 raw.raw | 1.5724E4        | 2        | 2                   | 203   | 213 |                                     |                                                                                  | PEAKS DB |
| K.NPQLQ(+.98)DLDMMLTC(+57.02)VEIKEGALMLPHFNSK.A           | N    | 59.95  | 3372.6226 | 29     | 5.7  | 1125.2212 | 3 | 37.84 | 2        | F2:1936 | OB5940 H1 raw.raw | 5.4487E7        | 3        | 3                   | 420   | 448 | Carbamidomethylation                | Q5:Deamidation (NQ):32.28;C13:Carbamidomethylation:1000.00                       | PEAKS DB |
| K.N(+.98)PQLQDLDMMLTC(+57.02)VEIKEGALMLPHFNSK.A           | N    | 55.55  | 3372.6226 | 29     | 5.7  | 1125.2212 | 3 | 37.84 | 2        | F2:1983 | OB5940 H1 raw.raw | 1.3378E7        | 1        | 1                   | 420   | 448 | Carbamidomethylation                | N1:Deamidation (NQ):14.04;C13:Carbamidomethylation:1000.00                       | PEAKS DB |
| R.EGEQEWGTPGSHVRETSR.N                                    | N    | 55.42  | 2169.9675 | 19     | 1.4  | 724.3308  | 3 | 26.17 | 1        | F1:1192 | OB5939 H1 raw.raw | 2.1848E6        | 5        | 5                   | 153   | 171 |                                     |                                                                                  | PEAKS DB |
| K.NPQLQDLDM(+15.99)LTC(+57.02)VEIKEGALM(+15.99)LPHFNSK.A  | N    | 54.50  | 3403.6284 | 29     | 4.5  | 1135.5552 | 3 | 36.52 | 3        | F3:1873 | OB5941 H1 raw.raw | 6.8814E5        | 2        | 2                   | 420   | 448 | Carbamidomethylation                | M10:Oxidation (M):12.28;C13:Carbamidomethylation:1000.00;M22:Oxidation (M):28.29 | PEAKS DB |
| R.EQEWEDEDEDEEGSNREVR.R                                   | N    | 54.08  | 2665.0535 | 21     | 2.4  | 889.3606  | 3 | 27.87 | 1        | F1:1308 | OB5939 H1 raw.raw | 4.4193E5        | 2        | 2                   | 478   | 498 |                                     |                                                                                  | PEAKS DB |
| R.WGPAGPR.E                                               | N    | 53.83  | 739.3765  | 7      | -0.2 | 370.6955  | 2 | 24.50 | 2        | F2:1143 | OB5940 H1 raw.raw | 2.1628E5        | 2        | 2                   | 115   | 121 |                                     |                                                                                  | PEAKS DB |
| N.PFYFPSRR.F                                              | N    | 53.53  | 1068.5504 | 8      | 3.3  | 535.2842  | 2 | 28.95 | 1        | F1:1360 | OB5939 H1 raw.raw | 3.1024E6        | 3        | 3                   | 174   | 181 |                                     |                                                                                  | PEAKS DB |

total 145 peptides

| Peptide                                           | Uniq | -10lgP | Mass      | Length | ppm  | m/z       | z | RT    | Fraction | Scan    | Source File       | Area raw peanut | #Feature | #Feature raw peanut | Start | End | PTM                            | AScore                                                 | Found By  |
|---------------------------------------------------|------|--------|-----------|--------|------|-----------|---|-------|----------|---------|-------------------|-----------------|----------|---------------------|-------|-----|--------------------------------|--------------------------------------------------------|-----------|
| R.LFEVKPKDKNPQLQDLDMM(+15.99)LTC(+57.02)VEIK.E    | N    | 53.37  | 3147.6018 | 26     | -4.4 | 787.9042  | 4 | 32.55 | 3        | F3:1633 | OB5941 H1 raw.raw | 2.1681E6        | 3        | 3                   | 411   | 436 | Carbamidomethylation           | M19:Oxidation(M):17.01;C2:Carbamidomethylation:1000.00 | PEAKS DB  |
| K.NPQLQDLDMMLTCVEIK(+14.02)EGALM(+15.99)LPHFNSK.A | N    | 52.56  | 3344.6277 | 29     | 4.1  | 837.1677  | 4 | 37.13 | 2        | F2:1903 | OB5940 H1 raw.raw | 1.5437E6        | 1        | 1                   | 420   | 448 | Oxidation (M)                  | K17:Methylation(KR):24.93;M22:Oxidation(M):51.99       | PEAKS PTM |
| R.NT(-18.01)LEAAFAEFNEIRR.V                       | N    | 52.23  | 1875.9227 | 16     | -2.4 | 626.3134  | 3 | 33.43 | 2        | F2:1683 | OB5940 H1 raw.raw | 1.354E7         | 3        | 3                   | 316   | 331 | Dehydration                    | T2:Dehydration:1000.00                                 | PEAKS PTM |
| L.EAAFAEFNEIRR.V                                  | N    | 52.09  | 1565.7585 | 13     | -4.7 | 783.8829  | 2 | 34.06 | 1        | F1:1677 | OB5939 H1 raw.raw | 1.7113E6        | 2        | 2                   | 319   | 331 |                                |                                                        | PEAKS DB  |
| K.IRPEGREGGEQEWGTPGSHVR.E                         | N    | 51.92  | 2276.1045 | 20     | 0.7  | 570.0338  | 4 | 26.47 | 3        | F3:1255 | OB5941 H1 raw.raw | 1.9287E5        | 1        | 1                   | 147   | 166 |                                |                                                        | PEAKS DB  |
| R.LFEVKPKDK.K                                     | N    | 51.87  | 974.5436  | 8      | 0.9  | 488.2795  | 2 | 25.40 | 1        | F1:1153 | OB5939 H1 raw.raw | 7.0978E5        | 6        | 6                   | 411   | 418 |                                |                                                        | PEAKS DB  |
| R.IVQIEAKP(+15.99)NTLVLPK.H                       | N    | 51.31  | 1678.0028 | 15     | -2.8 | 840.0063  | 2 | 29.56 | 3        | F3:1444 | OB5941 H1 raw.raw | 9.9803E5        | 2        | 2                   | 214   | 228 | Hydroxylation Pro              | P8:Hydroxylation Pro:65.06                             | PEAKS DB  |
| K.K(+43.01)(+14.02)GSEEEGDITNPINLR.E              | N    | 51.26  | 1827.8962 | 16     | 0.6  | 914.9559  | 2 | 28.50 | 3        | F3:1391 | OB5941 H1 raw.raw | 2.757E5         | 2        | 2                   | 383   | 398 | Carbamylation; Methylation(KR) | K1:Carbamylation:1000.00;K1:Methylation(KR):168.07     | PEAKS PTM |
| K.NPQLQDLDMM(+15.99)LTCVEIK(+14.02).E             | N    | 51.01  | 2019.9679 | 17     | -7.0 | 1010.9842 | 2 | 37.36 | 1        | F1:1877 | OB5939 H1 raw.raw | 0               | 0        | 0                   | 420   | 436 | Methylation(KR)                | M10:Oxidation(M):11.06;K17:Methylation(KR):1000.00     | PEAKS PTM |
| R.RVLLLEENAGGEQEERQQR.R                           | N    | 50.12  | 2069.0249 | 18     | 2.1  | 690.6837  | 3 | 24.88 | 2        | F2:1165 | OB5940 H1 raw.raw | 2.8524E5        | 1        | 1                   | 331   | 348 |                                |                                                        | PEAKS DB  |
| K.KNPQLQDLDMM(-48.00)LTC(+57.02)VEIK.E            | N    | 49.96  | 2127.0703 | 18     | 1.7  | 710.0319  | 3 | 30.71 | 2        | F2:1521 | OB5940 H1 raw.raw | 3.3467E6        | 2        | 2                   | 419   | 436 | Carbamidomethylation           | M11:Dehydration:14.02;C14:Carbamidomethylation:1000.00 | PEAKS PTM |
| K.KNPQLQDLDMMLTCVEIK(+14.02)EGALMLPHFNSK.A        | N    | 49.06  | 3456.7278 | 30     | 2.7  | 865.1915  | 4 | 36.90 | 2        | F2:1892 | OB5940 H1 raw.raw | 3.1386E5        | 1        | 1                   | 419   | 448 | Methylation(KR)                | K18:Methylation(KR):50.90                              | PEAKS PTM |

total 145 peptides

| Peptide                                                   | Uniq | -10lgP | Mass      | Length | ppm  | m/z      | z | RT    | Fraction | Scan    | Source File       | Area raw peanut | #Feature | #Feature raw peanut | Start | End | PTM                                    | AScore                                                                               | Found By  |
|-----------------------------------------------------------|------|--------|-----------|--------|------|----------|---|-------|----------|---------|-------------------|-----------------|----------|---------------------|-------|-----|----------------------------------------|--------------------------------------------------------------------------------------|-----------|
| K.NPQLQDLDM(+15.99)LTC(+57.02)VEIKEGALMLPHFN(+.98)SK.A    | N    | 48.99  | 3388.6174 | 29     | 5.0  | 848.1659 | 4 | 36.17 | 3        | F3:1849 | OB5941 H1 raw.raw | 7.0919E6        | 2        | 2                   | 420   | 448 | Carbamidomethylation; Deamidation (NQ) | M10:Oxidation (M):0.00;C13:Carbamidomethylation:1000.00;N27:Deamidation (NQ):51.54   | PEAKS DB  |
| R.LFEVKPKDKKNPQLQDLDM(+15.99)M(+15.99)LTC(+57.02)VEIK.E   | N    | 48.67  | 3163.5967 | 26     | 2.1  | 791.9081 | 4 | 32.37 | 1        | F1:1585 | OB5939 H1 raw.raw | 6.4006E5        | 1        | 1                   | 411   | 436 | Oxidation (M); Carbamidomethylation    | M18:Oxidation (M):1000.00;M19:Oxidation (M):1000.00;C22:Carbamidomethylation:1000.00 | PEAKS DB  |
| K.NPQLQDLDM(+15.99)MLTC(+57.02)VEIKEGALM(+15.99)LPHFNSK.A | N    | 48.60  | 3403.6284 | 29     | 2.2  | 851.9163 | 4 | 36.24 | 2        | F2:1851 | OB5940 H1 raw.raw | 3.928E6         | 2        | 2                   | 420   | 448 | Carbamidomethylation; Oxidation (M)    | M9:Oxidation (M):10.11;C13:Carbamidomethylation:1000.00;M22:Oxidation (M):53.09      | PEAKS DB  |
| N.TPGQFEDFFPASSR.D                                        | N    | 48.49  | 1584.7208 | 14     | -0.2 | 793.3676 | 2 | 35.63 | 3        | F3:1821 | OB5941 H1 raw.raw | 2.7376E5        | 1        | 1                   | 291   | 304 |                                        |                                                                                      | PEAKS DB  |
| R.NTLEAAFN(+.98)AEFNEIRR.V                                | N    | 48.19  | 1894.9172 | 16     | -0.3 | 948.4656 | 2 | 32.92 | 1        | F1:1570 | OB5939 H1 raw.raw | 1.5926E6        | 1        | 1                   | 316   | 331 |                                        | N8:Deamidation (NQ):8.26                                                             | PEAKS DB  |
| K.NPQLQDLDMMLTC(+57.02)VEIKEGALMLPHFN(+.98)SK.A           | N    | 47.92  | 3372.6226 | 29     | 7.4  | 844.1691 | 4 | 37.85 | 2        | F2:1914 | OB5940 H1 raw.raw | 5.3901E7        | 2        | 2                   | 420   | 448 | Carbamidomethylation; Deamidation (NQ) | C13:Carbamidomethylation:1000.00;N27:Deamidation (NQ):61.84                          | PEAKS DB  |
| R.QFQNLQNHR.I                                             | N    | 46.78  | 1183.5846 | 9      | 0.4  | 592.7998 | 2 | 23.96 | 2        | F2:1106 | OB5940 H1 raw.raw | 7.7423E4        | 5        | 5                   | 205   | 213 |                                        |                                                                                      | PEAKS DB  |
| R.EQEWEDEDEDEEGSNREVR.R.Y                                 | N    | 46.42  | 2821.1545 | 22     | 1.8  | 941.3939 | 3 | 26.75 | 1        | F1:1227 | OB5939 H1 raw.raw | 3.455E6         | 3        | 3                   | 478   | 499 |                                        |                                                                                      | PEAKS DB  |
| K.Q(-17.03)AKDLAFPGSGEQVEK.L                              | N    | 45.78  | 1685.8260 | 16     | 0.9  | 843.9211 | 2 | 29.97 | 1        | F1:1427 | OB5939 H1 raw.raw | 0               | 0        | 0                   | 557   | 572 | Pyro-glu from Q                        | Q1:Pyro-glu from Q:1000.00                                                           | PEAKS PTM |

total 145 peptides

| Peptide                                           | Uniq | -10lgP | Mass      | Length | ppm  | m/z       | z | RT    | Fraction | Scan    | Source File       | Area raw peanut | #Feature | #Feature raw peanut | Start | End | PTM                                                         | AScore                                                                              | Found By  |
|---------------------------------------------------|------|--------|-----------|--------|------|-----------|---|-------|----------|---------|-------------------|-----------------|----------|---------------------|-------|-----|-------------------------------------------------------------|-------------------------------------------------------------------------------------|-----------|
| V.QIEAKPNTLVLPK.H                                 | N    | 45.72  | 1449.8555 | 13     | -3.5 | 725.9325  | 2 | 29.92 | 3        | F3:1467 | OB5941 H1 raw.raw | 1.2647E6        | 3        | 3                   | 216   | 228 |                                                             |                                                                                     | PEAKS DB  |
| K.KN(+.98)PQLQDLDMMLTC(+15.99)LTC(+57.02)VEIK.E   | N    | 44.87  | 2192.0527 | 18     | 9.2  | 1097.0437 | 2 | 32.33 | 2        | F2:1621 | OB5940 H1 raw.raw | 8.5764E4        | 1        | 1                   | 419   | 436 | Carbamidomethylation                                        | N2:Deamidation (NQ):14.04; M11:Oxidation (M):0.00; C14:Carbamidomethylation:1000.00 | PEAKS DB  |
| R.I(+42.01)VQ(+15.00)IEAKPNTLVLPK.H               | N    | 43.55  | 1719.0182 | 15     | 6.6  | 860.5220  | 2 | 30.00 | 2        | F2:1474 | OB5940 H1 raw.raw | 1.6151E7        | 3        | 3                   | 214   | 228 | Acetylation (N-term); Deamidation followed by a methylation | I1:Acetylation (N-term):100.00; Q3:Deamidation followed by a methylation:121.92     | PEAKS PTM |
| R.LFEVKPDKK.N                                     | N    | 43.08  | 1102.6385 | 9      | 1.1  | 552.3271  | 2 | 24.94 | 3        | F3:1179 | OB5941 H1 raw.raw | 2.3087E5        | 2        | 2                   | 411   | 419 |                                                             |                                                                                     | PEAKS DB  |
| N.TLEAAFNAEFNEIRR.V                               | N    | 43.00  | 1779.8904 | 15     | -3.0 | 890.9498  | 2 | 32.91 | 3        | F3:1655 | OB5941 H1 raw.raw | 4.3913E5        | 1        | 1                   | 317   | 331 |                                                             |                                                                                     | PEAKS DB  |
| K.NPQLQDLDMMLTC(+57.02)VEIKEGALM(-48.00)LPHFNSK.A | N    | 42.94  | 3323.6353 | 29     | -1.0 | 831.9153  | 4 | 35.81 | 3        | F3:1829 | OB5941 H1 raw.raw | 2.5446E6        | 1        | 1                   | 420   | 448 | Carbamidomethylation                                        | C13:Carbamidomethylation:1000.00; M22:Deamidation:30.24                             | PEAKS PTM |
| R.WGP(+15.99)AGPR.E                               | N    | 42.77  | 755.3714  | 7      | -0.4 | 378.6928  | 2 | 22.57 | 2        | F2:1037 | OB5940 H1 raw.raw | 3.1259E3        | 1        | 1                   | 115   | 121 |                                                             | P3:Hydroxylation Pro:22.34                                                          | PEAKS DB  |
| K.KNPQLQ(+.98)DLDMMLTC(+57.02)VEIKEGALMLPHFNSK.A  | N    | 42.58  | 3500.7175 | 30     | 0.4  | 1167.9136 | 3 | 36.34 | 2        | F2:1850 | OB5940 H1 raw.raw | 5.0176E5        | 1        | 1                   | 419   | 448 | Carbamidomethylation                                        | Q6:Deamidation (NQ):14.04; C14:Carbamidomethylation:1000.00                         | PEAKS DB  |
| R.REQEWEEEEEEEEEGSN(+.98)R.E                      | N    | 42.55  | 2437.9265 | 19     | 7.6  | 813.6556  | 3 | 26.55 | 1        | F1:1226 | OB5939 H1 raw.raw | 3.9265E4        | 1        | 1                   | 477   | 495 |                                                             | N18:Deamidation (NQ):0.00                                                           | PEAKS DB  |

total 145 peptides

| Peptide                                                   | Uniq | -10lgP | Mass      | Length | ppm   | m/z       | z | RT    | Fraction | Scan    | Source File       | Area raw peanut | #Feature | #Feature raw peanut | Start | End | PTM                                     | AScore                                                                               | Found By  |
|-----------------------------------------------------------|------|--------|-----------|--------|-------|-----------|---|-------|----------|---------|-------------------|-----------------|----------|---------------------|-------|-----|-----------------------------------------|--------------------------------------------------------------------------------------|-----------|
| K.NPQLQDLDMMLTC(+57.02)VEIK(+43.01)EGALMLPHFNSK(+14.02).A | N    | 42.54  | 3428.6602 | 29     | -4.2  | 1143.8892 | 3 | 37.82 | 3        | F3:1939 | OB5941 H1 raw.raw | 1.0346E6        | 1        | 1                   | 420   | 448 | Carbamidomethylation                    | C13:Carbamidomethylation:1000.00;K17:Carbamylation:10.80;K29: Methylation (KR):10.80 | PEAKS PTM |
| K.GTGNLELVAVRKEQQQR.G                                     | N    | 41.95  | 1925.0442 | 17     | 1.8   | 642.6898  | 3 | 26.36 | 1        | F1:1214 | OB5939 H1 raw.raw | 1.4197E5        | 3        | 3                   | 458   | 474 |                                         |                                                                                      | PEAKS DB  |
| K.D(+43.01)(+14.02)LAPGSGEQVEK.L                          | N    | 41.75  | 1432.6833 | 13     | 3.8   | 717.3517  | 2 | 30.92 | 1        | F1:1485 | OB5939 H1 raw.raw | 2.8695E5        | 1        | 1                   | 560   | 572 | Carbamylation; Methylation(others)      | D1:Carbamylation:166.34;D1: Methylation (others):102.87                              | PEAKS PTM |
| K.KN(+.98)PQLQDLDMMLTC(+57.02)VEIKEGALMLPHFNSK.A          | N    | 40.34  | 3500.7175 | 30     | 7.1   | 876.1929  | 4 | 36.26 | 2        | F2:1847 | OB5940 H1 raw.raw | 2.213E6         | 1        | 1                   | 419   | 448 | Carbamidomethylation                    | N2:Deamidation (NQ):0.00;C14:Carbamidomethylation:1000.00                            | PEAKS DB  |
| K.NPQLQDLDM(+15.99)MLTC(+57.02)VEIKEGALMLP(+15.99)HFNSK.A | N    | 40.24  | 3403.6284 | 29     | -10.2 | 851.9057  | 4 | 36.72 | 1        | F1:1838 | OB5939 H1 raw.raw | 0               | 0        | 0                   | 420   | 448 | Carbamidomethylation; Hydroxylation Pro | M9:Oxidation (M):26.02;C13:Carbamidomethylation:1000.00;P24:Hydroxylation Pro:63.93  | PEAKS DB  |
| R.ESHFVSARPSQSP(+15.99)SSPEKEDQEEEN.Q                     | N    | 40.09  | 2973.2859 | 26     | -2.5  | 992.1001  | 3 | 25.16 | 1        | F1:1143 | OB5939 H1 raw.raw | 0               | 0        | 0                   | 579   | 604 |                                         | P14:Hydroxylation Pro:29.32                                                          | PEAKS DB  |
| T.PGQFEDFFPASSR.D                                         | N    | 39.65  | 1483.6731 | 13     | -1.3  | 742.8429  | 2 | 40.34 | 2        | F2:2103 | OB5940 H1 raw.raw | 3.5787E3        | 1        | 1                   | 292   | 304 |                                         |                                                                                      | PEAKS DB  |
| K.EGALM(-48.00)LPHFNSK.A                                  | N    | 38.72  | 1294.6670 | 12     | 2.0   | 432.5638  | 3 | 28.31 | 3        | F3:1348 | OB5941 H1 raw.raw | 1.3523E6        | 1        | 1                   | 437   | 448 | Dethiomethyl                            | M5:Dethiomethyl:100.00                                                               | PEAKS PTM |
| R.DQS(-18.01)SYLQGFSR.N                                   | N    | 38.22  | 1268.5785 | 11     | 7.0   | 635.3010  | 2 | 30.87 | 1        | F1:1484 | OB5939 H1 raw.raw | 0               | 0        | 0                   | 305   | 315 |                                         | S3:Dehydration:33.98                                                                 | PEAKS PTM |

total 145 peptides

| Peptide                                                       | Uniq | -10lgP | Mass      | Length | ppm  | m/z       | z | RT    | Fraction | Scan    | Source File       | Area raw peanut | #Feature | #Feature raw peanut | Start | End | PTM                                 | AScore                                                                                                         | Found By  |
|---------------------------------------------------------------|------|--------|-----------|--------|------|-----------|---|-------|----------|---------|-------------------|-----------------|----------|---------------------|-------|-----|-------------------------------------|----------------------------------------------------------------------------------------------------------------|-----------|
| K.N(+.98)PQ(+.98)LQDLDMMLTC(+57.02)VEIKEGALM(+15.99)LPHFNSK.A | N    | 37.95  | 3389.6016 | 29     | 9.0  | 848.4153  | 4 | 36.92 | 1        | F1:1851 | OB5939 H1 raw.raw | 8.517E6         | 2        | 2                   | 420   | 448 | Carbamidomethylation                | N1:Deamidation (NQ):11.12; Q3:Deamidation (NQ):0.00; C13:Carbamidomethylation:1000.00; M22:Oxidation (M):24.93 | PEAKS DB  |
| R.WGPAGP(+15.99)R.E                                           | N    | 37.74  | 755.3714  | 7      | 0.0  | 378.6930  | 2 | 23.87 | 3        | F3:1097 | OB5941 H1 raw.raw | 7.3229E3        | 1        | 1                   | 115   | 121 |                                     | P6:Hydroxylation Pro:32.97                                                                                     | PEAKS DB  |
| K.NPQLQDLDM(-48.00)LTC(+57.02)VEIKEGALMLPHFNSK.A              | N    | 36.81  | 3323.6353 | 29     | 0.8  | 1108.8866 | 3 | 35.97 | 3        | F3:1833 | OB5941 H1 raw.raw | 5.0189E6        | 2        | 2                   | 420   | 448 | Carbamidomethylation                | M10:Deamidation:8.14; C13:Carbamidomethylation:1000.00                                                         | PEAKS PTM |
| R.LFEVKPKKN(+.98)PQLQDLDMMLTC(+57.02)VEIK.E                   | N    | 36.71  | 3132.5908 | 26     | 9.3  | 1567.3173 | 2 | 34.35 | 3        | F3:1745 | OB5941 H1 raw.raw | 2.2872E5        | 1        | 1                   | 411   | 436 | Carbamidomethylation                | N10:Deamidation (NQ):14.04; C22:Carbamidomethylation:1000.00                                                   | PEAKS DB  |
| R.ESHFVSARPSQSP(+15.99)SSPEKEDQEE.N                           | N    | 36.67  | 2859.2429 | 25     | 2.6  | 954.0907  | 3 | 24.51 | 2        | F2:1151 | OB5940 H1 raw.raw | 1.0898E4        | 1        | 1                   | 579   | 603 |                                     | P14:Hydroxylation Pro:12.33                                                                                    | PEAKS DB  |
| R.E(-18.01)GEQEWGTPGSHVR.E                                    | N    | 36.58  | 1549.6909 | 14     | -1.7 | 775.8514  | 2 | 27.60 | 3        | F3:1325 | OB5941 H1 raw.raw | 5.8319E4        | 1        | 1                   | 153   | 166 | Pyro-glu from E                     | E1:Pyro-glu from E:1000.00                                                                                     | PEAKS PTM |
| K.NPQLQDLDM(+15.99)M(+15.99)LTC(+57.02)VEIK.E                 | N    | 36.40  | 2078.9688 | 17     | 1.1  | 1040.4928 | 2 | 33.80 | 3        | F3:1701 | OB5941 H1 raw.raw | 0               | 0        | 0                   | 420   | 436 | Oxidation (M); Carbamidomethylation | M9:Oxidation (M):1000.00; M10:Oxidation (M):1000.00; C13:Carbamidomethylation:1000.00                          | PEAKS DB  |
| R.N(-17.03)NPFYFSPRR.F                                        | N    | 36.19  | 1279.6097 | 10     | -0.4 | 427.5437  | 3 | 28.25 | 2        | F2:1369 | OB5940 H1 raw.raw | 1.5243E5        | 1        | 1                   | 172   | 181 |                                     | N1:Ammonia-loss (N):0.00                                                                                       | PEAKS PTM |

total 145 peptides

| Peptide                                                  | Uniq | -10lgP | Mass      | Length | ppm  | m/z       | z | RT    | Fraction | Scan    | Source File       | Area raw peanut | #Feature | #Feature raw peanut | Start | End | PTM                  | AScore                                                                               | Found By  |
|----------------------------------------------------------|------|--------|-----------|--------|------|-----------|---|-------|----------|---------|-------------------|-----------------|----------|---------------------|-------|-----|----------------------|--------------------------------------------------------------------------------------|-----------|
| K.NPQ(+.98)LQDLDMMLTC(+57.02)VEIKEGALMLPHFNSK.A          | N    | 36.11  | 3372.6226 | 29     | 9.4  | 1125.2253 | 3 | 40.75 | 1        | F1:2064 | OB5939 H1 raw.raw | 5.8612E5        | 1        | 1                   | 420   | 448 | Carbamidomethylation | Q3:Deamidation (NQ): 0.00;C13:Carbamidomethylation:1000.00                           | PEAKS DB  |
| K.N(+.98)PQ(+.98)LQDLDMMLTC(+57.02)VEIKEGALMLPHFNSK.A    | N    | 35.87  | 3373.6067 | 29     | 9.1  | 1687.8259 | 2 | 38.03 | 2        | F2:1999 | OB5940 H1 raw.raw | 2.685E5         | 1        | 1                   | 420   | 448 | Carbamidomethylation | N1:Deamidation (NQ): 3.13;Q3:Deamidation (NQ): 5.47;C13:Carbamidomethylation:1000.00 | PEAKS DB  |
| Q.IEAKPNTLVLPK.H                                         | N    | 35.55  | 1321.7969 | 12     | -4.5 | 661.9028  | 2 | 29.65 | 2        | F2:1449 | OB5940 H1 raw.raw | 6.4226E5        | 2        | 2                   | 217   | 228 |                      |                                                                                      | PEAKS DB  |
| K.EGALMLPH(+14.02)FNSK.A                                 | N    | 35.50  | 1356.6860 | 12     | 1.3  | 679.3512  | 2 | 30.49 | 3        | F3:1499 | OB5941 H1 raw.raw | 2.5433E4        | 1        | 1                   | 437   | 448 | Methylation(others)  | H8:Methylation (others):53.53                                                        | PEAKS PTM |
| R.VLLE(+21.98)ENAGGEQEER.G                               | N    | 35.40  | 1593.7246 | 14     | -0.7 | 797.8690  | 2 | 26.03 | 2        | F2:1239 | OB5940 H1 raw.raw | 1.529E5         | 3        | 3                   | 332   | 345 |                      | E4:Sodium adduct:40.00                                                               | PEAKS PTM |
| K.NP(+15.99)QLQDLDM(+15.99)LTC(+57.02)VEIKEGALMLPHFNSK.A | N    | 35.20  | 3403.6284 | 29     | -3.4 | 851.9115  | 4 | 35.28 | 1        | F1:1792 | OB5939 H1 raw.raw | 1.7685E6        | 1        | 1                   | 420   | 448 | Carbamidomethylation | P2:Hydroxylation Pro: 48.46;M10:Oxidation (M):11.06;C13:Carbamidomethylation:1000.00 | PEAKS DB  |
| K.HADADNILVIQQ(-18.01).G                                 | N    | 34.95  | 1317.6677 | 12     | -4.9 | 659.8379  | 2 | 29.56 | 3        | F3:1421 | OB5941 H1 raw.raw | 1.0066E5        | 1        | 1                   | 229   | 240 | Dehydration          | Q12:Dehydration:76.18                                                                | PEAKS PTM |
| K.GT(-18.01)GNLELVAVRK.E                                 | N    | 34.88  | 1237.7142 | 12     | 0.9  | 413.5790  | 3 | 26.41 | 2        | F2:1259 | OB5940 H1 raw.raw | 7.6712E5        | 3        | 3                   | 458   | 469 | Dehydration          | T2:Dehydration:1000.00                                                               | PEAKS PTM |
| K.NPQLQDLDM(-48.00)MLTC(+57.02)VEIKEGALMLPHFNSK.A        | N    | 34.70  | 3323.6353 | 29     | 8.1  | 831.9229  | 4 | 35.72 | 2        | F2:1816 | OB5940 H1 raw.raw | 1.6745E6        | 2        | 2                   | 420   | 448 | Carbamidomethylation | M9:Detachment:17.01;C13:Carbamidomethylation:1000.00                                 | PEAKS PTM |

total 145 peptides



| Peptide                                | Uniq | -10lgP | Mass      | Length | ppm  | m/z      | z | RT    | Fraction | Scan    | Source File       | Area raw peanut | #Feature | #Feature raw peanut | Start | End | PTM                                | AScore                                               | Found By  |
|----------------------------------------|------|--------|-----------|--------|------|----------|---|-------|----------|---------|-------------------|-----------------|----------|---------------------|-------|-----|------------------------------------|------------------------------------------------------|-----------|
| N.PQLQDLMLTC(+57.02)VEIKEGALMLPHFNSK.A | N    | 34.02  | 3257.5957 | 28     | 0.9  | 815.4069 | 4 | 37.83 | 3        | F3:1952 | OB5941 H1 raw.raw | 2.5417E5        | 1        | 1                   | 421   | 448 | Carbamidomethylation               | C12:Carbamidomethylation:1000.00                     | PEAKS DB  |
| R.IVQ(+.98)IEAKPNTLVLPK.H              | N    | 33.90  | 1662.9919 | 15     | 6.7  | 832.5088 | 2 | 31.45 | 2        | F2:1578 | OB5940 H1 raw.raw | 3.0057E5        | 1        | 1                   | 214   | 228 |                                    | Q3:Deamidation (NQ):13.11                            | PEAKS DB  |
| K.AMVIVVINK(+43.01)GTGNELVAVRK.E       | Y    | 33.56  | 2266.3196 | 21     | -2.3 | 756.4454 | 3 | 32.33 | 2        | F2:1600 | OB5940 H1 raw.raw | 9.4705E6        | 1        | 1                   | 449   | 469 | Carbamylation                      | K9:Carbamylation:73.08                               | PEAKS PTM |
| K.PNTLVLPK.H                           | N    | 33.50  | 880.5382  | 8      | 0.4  | 441.2766 | 2 | 27.53 | 2        | F2:1313 | OB5940 H1 raw.raw | 8.6509E4        | 1        | 1                   | 221   | 228 |                                    |                                                      | PEAKS DB  |
| K.G(+43.01)T(+14.02)GNLELVAVRK.E       | N    | 33.06  | 1312.7462 | 12     | -0.8 | 657.3799 | 2 | 26.85 | 3        | F3:1280 | OB5941 H1 raw.raw | 3.165E5         | 2        | 2                   | 458   | 469 | Carbamylation; Methylation(others) | G1:Carbamylation:148.28;T2:Methylation(others):59.30 | PEAKS PTM |
| R.REQEWEEEEEEEEGSNREVR.R               | N    | 33.06  | 2821.1545 | 22     | 3.9  | 941.3958 | 3 | 26.47 | 3        | F3:1247 | OB5941 H1 raw.raw | 1.8551E6        | 1        | 1                   | 477   | 498 |                                    |                                                      | PEAKS DB  |
| K.KGSEEEGDIT(-18.01)N(+.98)PINLR.E     | N    | 33.05  | 1753.8483 | 16     | 2.8  | 585.6250 | 3 | 28.08 | 2        | F2:1354 | OB5940 H1 raw.raw | 8.0018E5        | 2        | 2                   | 383   | 398 |                                    | T10:Dehydration:25.86;N11:Deamidation (NQ):32.46     | PEAKS PTM |
| R.EREEDWRQPR.E                         | N    | 31.07  | 1399.6592 | 10     | 0.1  | 467.5604 | 3 | 24.77 | 3        | F3:1154 | OB5941 H1 raw.raw | 2.8345E4        | 1        | 1                   | 124   | 133 |                                    |                                                      | PEAKS DB  |
| R.EGEQEW(+15.99)GTPGSHVRETSR.N         | N    | 30.97  | 2185.9624 | 19     | 1.0  | 729.6621 | 3 | 25.31 | 3        | F3:1191 | OB5941 H1 raw.raw | 3.6705E4        | 1        | 1                   | 153   | 171 |                                    | W6:Oxidation (HW):12.65                              | PEAKS PTM |
| K.HADADNILVIQQGQATVT(-18.01)VANGNNR.R  | N    | 29.88  | 2600.3054 | 25     | -2.7 | 867.7734 | 3 | 30.76 | 3        | F3:1503 | OB5941 H1 raw.raw | 3.2843E5        | 1        | 1                   | 229   | 253 |                                    | T18:Dehydration:22.85                                | PEAKS PTM |
| K.NPQLQDLDM(-48.00)MLTC(+57.02)VEIK.E  | N    | 29.75  | 1998.9755 | 17     | -0.6 | 667.3320 | 3 | 34.07 | 2        | F2:1713 | OB5940 H1 raw.raw | 8.006E5         | 1        | 1                   | 420   | 436 | Carbamidomethylation               | M9:Dehydration:0.00;C13:Carbamidomethylation:1000.00 | PEAKS PTM |
| R.EDWRRPSHQPR.K                        | N    | 29.71  | 1590.7764 | 12     | -0.3 | 398.7013 | 4 | 24.94 | 3        | F3:1169 | OB5941 H1 raw.raw | 1.2481E4        | 1        | 1                   | 134   | 145 |                                    |                                                      | PEAKS DB  |
| N.NPFYFPSRR.F                          | N    | 29.59  | 1182.5934 | 9      | 1.6  | 395.2057 | 3 | 28.08 | 2        | F2:1358 | OB5940 H1 raw.raw | 2.5271E4        | 1        | 1                   | 173   | 181 |                                    |                                                      | PEAKS DB  |

total 145 peptides

| Peptide                                                              | Uniq | -10lgP | Mass      | Length | ppm  | m/z       | z | RT    | Fraction | Scan    | Source File       | Area raw peanut | #Feature | #Feature raw peanut | Start | End | PTM                                           | AScore                                                                                                                                      | Found By  |
|----------------------------------------------------------------------|------|--------|-----------|--------|------|-----------|---|-------|----------|---------|-------------------|-----------------|----------|---------------------|-------|-----|-----------------------------------------------|---------------------------------------------------------------------------------------------------------------------------------------------|-----------|
| R.IVQIEAKPNTLVLP(+15.99)K(-.98)(+42.01).H                            | N    | 29.49  | 1719.0294 | 15     | 3.0  | 860.5245  | 2 | 30.75 | 1        | F1:1437 | OB5939 H1 raw.raw | 4.8723E6        | 1        | 1                   | 214   | 228 | Hydroxylation Pro; Amidation; Acetylation (K) | P14:Hydroxylation Pro:62.39;K15:Amidation:100.00;K15:Acetylation (K):66.64                                                                  | PEAKS PTM |
| K.N(+.98)PQ(+.98)LQ(+.98)DLDMM(+15.99)LTC(+57.02)VEIKEGALMLPHFNSK.A  | N    | 29.44  | 3390.5854 | 29     | 3.7  | 848.6568  | 4 | 38.47 | 3        | F3:1982 | OB5941 H1 raw.raw | 0               | 0        | 0                   | 420   | 448 | Deamidation (NQ); Carbamidomethylation        | N1:Deamidation (NQ):62.42; Q3:Deamidation (NQ):65.92; Q5:Deamidation (NQ):60.92; M10:Oxidation (M):12.28;C13:Carbamidomethylation:1000.00   | PEAKS DB  |
| R.EQEW(+15.99)EEEEEEEEEGSNR.E                                        | N    | 29.12  | 2296.8362 | 18     | 4.4  | 1149.4304 | 2 | 27.05 | 1        | F1:1252 | OB5939 H1 raw.raw | 0               | 0        | 0                   | 478   | 495 | Oxidation (HW)                                | W4:Oxidation (HW):1000.00                                                                                                                   | PEAKS PTM |
| K.HADADNILVIQQGQAT(-18.01)VTVANGNNR.R                                | N    | 29.07  | 2600.3054 | 25     | -1.0 | 867.7748  | 3 | 30.11 | 2        | F2:1479 | OB5940 H1 raw.raw | 0               | 0        | 0                   | 229   | 253 |                                               | T16:Dehydration:0.00                                                                                                                        | PEAKS PTM |
| R.E(-18.01)QEWEIEEEEEEEEGSNREVRR.Y                                   | N    | 28.92  | 2803.1440 | 22     | 2.8  | 935.3912  | 3 | 28.31 | 3        | F3:1363 | OB5941 H1 raw.raw | 2.9497E4        | 1        | 1                   | 478   | 499 | Pyro-glu from E                               | E1:Pyro-glu from E:1000.00                                                                                                                  | PEAKS PTM |
| K.KN(+.98)P(+15.99)Q(+.98)LQ(+.98)DLDMLTLC(+57.02)VEIKEGALMLPHFNSK.A | N    | 28.66  | 3518.6804 | 30     | -5.1 | 880.6729  | 4 | 37.59 | 1        | F1:1890 | OB5939 H1 raw.raw | 0               | 0        | 0                   | 419   | 448 | Deamidation (NQ); Carbamidomethylation        | N2:Deamidation (NQ):55.07;P3:Hydroxylation Pro:43.60;Q4:Deamidation (NQ):57.68; Q6:Deamidation (NQ):58.78; C14:Carbamidomethylation:1000.00 | PEAKS DB  |
| R.NTLEAAFAFNEIRRVLLEENAGGEQEER.G                                     | N    | 28.52  | 3447.6653 | 30     | -1.2 | 1150.2277 | 3 | 38.03 | 2        | F2:1966 | OB5940 H1 raw.raw | 1.3831E5        | 1        | 1                   | 316   | 345 |                                               |                                                                                                                                             | PEAKS DB  |

total 145 peptides

| Peptide                                                 | Uniq | -10lgP | Mass      | Length | ppm  | m/z       | z | RT    | Fraction | Scan    | Source File       | Area raw peanut | #Feature | #Feature raw peanut | Start | End | PTM                  | AScore                                                                             | Found By  |
|---------------------------------------------------------|------|--------|-----------|--------|------|-----------|---|-------|----------|---------|-------------------|-----------------|----------|---------------------|-------|-----|----------------------|------------------------------------------------------------------------------------|-----------|
| R.ESHFVSARPSQSP(+15.99)SSP(+15.99)EKEDQEEEN.Q           | N    | 28.43  | 2989.2808 | 26     | 0.3  | 997.4344  | 3 | 24.81 | 3        | F3:1156 | OB5941 H1 raw.raw | 0               | 0        | 0                   | 579   | 604 |                      | P14:Hydroxylation Pro:17.91;P17:Hydroxylation Pro:28.14                            | PEAKS DB  |
| K.NPQLQDLMM(+15.99)LTC(+58.01)VEIK.E                    | N    | 28.36  | 2063.9578 | 17     | -3.4 | 1032.9827 | 2 | 37.19 | 1        | F1:1881 | OB5939 H1 raw.raw | 2.5393E4        | 1        | 1                   | 420   | 436 | Carboxymethyl        | M10:Oxidation (M):8.69;C13:Carboxymethyl:1000.00                                   | PEAKS PTM |
| K.DLAFIGSGEQVEK(+14.02)LIK(+43.01).N                    | N    | 28.34  | 1786.9464 | 16     | -3.8 | 894.4771  | 2 | 32.91 | 3        | F3:1654 | OB5941 H1 raw.raw | 6.9695E5        | 1        | 1                   | 560   | 575 |                      | K13:Methylation(KR):4.52;K16:Carbamylation:4.52                                    | PEAKS PTM |
| K.KN(+.98)PQ(+.98)LQDLMMMLTC(+57.02)VEIKEGALMLPHFNSK.A  | N    | 28.34  | 3501.7017 | 30     | 6.9  | 1168.2493 | 3 | 36.92 | 1        | F1:1845 | OB5939 H1 raw.raw | 2.5153E5        | 1        | 1                   | 419   | 448 | Carbamidomethylation | N2:Deamidation (NQ):0.00;Q4:Deamidation (NQ):0.00;C14:Carbamidomethylation:1000.00 | PEAKS DB  |
| K.N(+.98)PQLQDLDM(+15.99)MLTC(+57.02)VEIKEGALMLPHFNSK.A | N    | 27.69  | 3388.6174 | 29     | 8.6  | 1130.5562 | 3 | 39.33 | 3        | F3:2085 | OB5941 H1 raw.raw | 8.4125E5        | 1        | 1                   | 420   | 448 | Carbamidomethylation | N1:Deamidation (NQ):0.00;M9:Oxidation (M):0.00;C13:Carbamidomethylation:1000.00    | PEAKS DB  |
| R.IFLAGDKDNVVDQIEK(+71.04).Q                            | Y    | 27.67  | 1873.9785 | 16     | -7.1 | 625.6624  | 3 | 32.19 | 3        | F3:1586 | OB5941 H1 raw.raw | 4.3111E6        | 1        | 1                   | 541   | 556 |                      | K16:Propanamide (K, X@N-term):31.37                                                | PEAKS PTM |
| R.EGEQEWGTP(+15.99)GSHVREETSR.N                         | N    | 27.48  | 2185.9624 | 19     | 1.1  | 729.6622  | 3 | 24.88 | 2        | F2:1169 | OB5940 H1 raw.raw | 1.6768E4        | 1        | 1                   | 153   | 171 | Hydroxylation Pro    | P9:Hydroxylation Pro:1000.00                                                       | PEAKS DB  |
| R.IVQIEAKPNT(-18.01)LVLPK.H                             | N    | 27.41  | 1643.9974 | 15     | 6.1  | 549.0098  | 3 | 30.06 | 1        | F1:1436 | OB5939 H1 raw.raw | 1.3913E6        | 1        | 1                   | 214   | 228 | Dehydration          | T10:Dehydration:100.00                                                             | PEAKS PTM |

total 145 peptides

| Peptide                      | Uniq | -10lgP | Mass      | Length | ppm | m/z      | z | RT    | Fraction | Scan    | Source File       | Area raw peanut | #Feature | #Feature raw peanut | Start | End | PTM                          | AScore                                   | Found By  |
|------------------------------|------|--------|-----------|--------|-----|----------|---|-------|----------|---------|-------------------|-----------------|----------|---------------------|-------|-----|------------------------------|------------------------------------------|-----------|
| K.K(+58.01)GSEEEGDITNPINLR.E | N    | 27.35  | 1828.8802 | 16     | 6.8 | 915.4536 | 2 | 28.67 | 3        | F3:1391 | OB5941 H1 raw.raw | 8.3578E4        | 1        | 1                   | 383   | 398 | Carboxymethyl (KW, X@N-term) | K1:Carboxymethyl (KW, X@N-term): 1000.00 | PEAKS PTM |
| total 145 peptides           |      |        |           |        |     |          |   |       |          |         |                   |                 |          |                     |       |     |                              |                                          |           |

tr|A0A290FZZ3|A0A290FZZ3\_ARAHY

back to list

| [Protein Coverage](#) | [Supporting Peptides](#) |

Protein Coverage:

1SDPSGMLSKWIRGTDCTWPGLNCLFENKRVTSISIAGQPDQNSFLSGTISSSLKLQFLDGIYFTNLRNISGPFPGFL

81LNMPNLEYIYIENSQISGRIPDSFGNSTRKFGAFSFQGNRLTGTVPSSLSLLTQLTQLKLGDNLLTGAIPDGIRNLKNLT

161YLSLQGNQLSGNIPDFFTSLSLNRILELSRNKFSGTIPASIATLAPTLGYLELGHNSLSGKIPDFLGKMKALDTLDLSSN

241RFTGSVPQSFKNLTKIFNLDLSNNLLVDPFPEMNVKGIESLDLSNNNLHLGTIPKWTSSPIIYSLKLAKCGIRMKLDDW

321KPSETYFYDYIDLSGNDISGSAIGLLNRDYLVGFWASGNKLKFDMGGLRIVEKLKY

Supporting Peptides:

| Peptide                   | Uniq | -10lgP | Mass      | Length | ppm  | m/z       | z | RT    | Fraction | Scan    | Source File       | Area raw peanut | #Feature | #Feature raw peanut | Start | End | PTM | AScore | Found By |
|---------------------------|------|--------|-----------|--------|------|-----------|---|-------|----------|---------|-------------------|-----------------|----------|---------------------|-------|-----|-----|--------|----------|
| R.LTGTVPSSLSLLTQLTQLK.L   | Y    | 87.74  | 1999.1565 | 19     | -0.9 | 1000.5846 | 2 | 38.02 | 1        | F1:1918 | OB5939 H1 raw.raw | 1.9568E5        | 1        | 1                   | 121   | 139 |     |        | PEAKS DB |
| K.IFNLDLSNNLLVDPFPEMNVK.G | Y    | 42.96  | 2431.2456 | 21     | 4.1  | 1216.6350 | 2 | 39.67 | 1        | F1:2010 | OB5939 H1 raw.raw | 0               | 0        | 0                   | 256   | 276 |     |        | PEAKS DB |
| total 2 peptides          |      |        |           |        |      |           |   |       |          |         |                   |                 |          |                     |       |     |     |        |          |

Peptide List

Summary

1. Notes Ara h 1 GEL BAND ROASTED

2. Result Statistics

Figure 1. False discovery rate (FDR) curve. X axis is the number of peptides being kept. Y axis is the corresponding FDR.

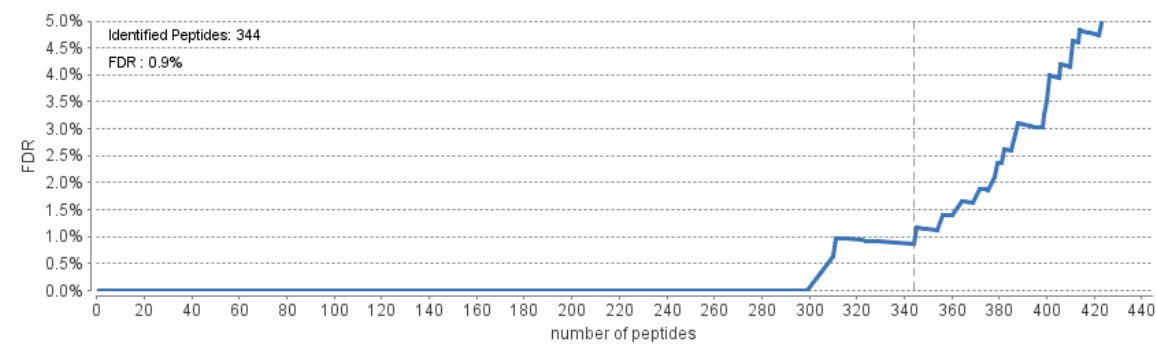

Figure 2. PSM score distribution. (a) Distribution of PEAKS peptide score; (b) Scatterplot of PEAKS peptide score versus precursor mass error.

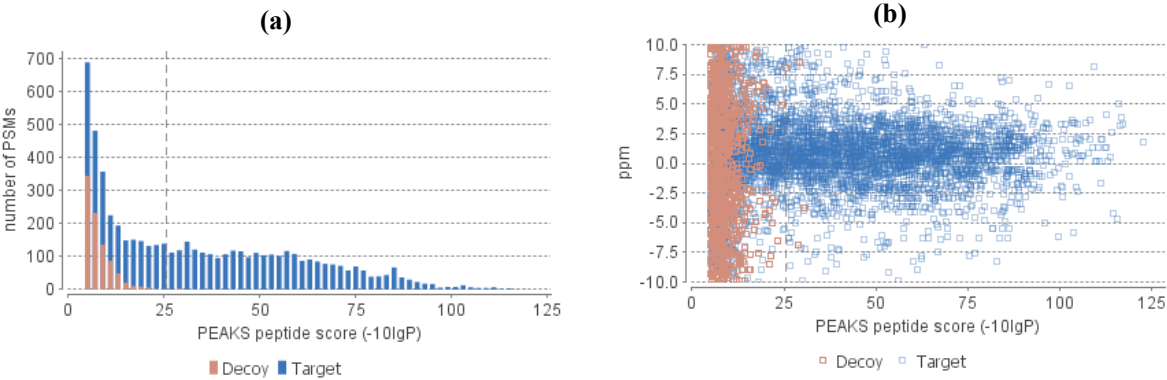

Table 1. Statistics of data.

|  | #Scans | #Features | Identified | #Peptides | #Sequences |
|--|--------|-----------|------------|-----------|------------|
|--|--------|-----------|------------|-----------|------------|

| 23/21, 10:33 AM |      |       |          |       |       |        |             |     |     | proteins   |     |     |
|-----------------|------|-------|----------|-------|-------|--------|-------------|-----|-----|------------|-----|-----|
|                 |      |       |          |       |       |        |             |     |     | #Proteins* |     |     |
|                 | MS1  | MS/MS | #Chimera |       | #PSMs | #Scans | #Features** |     |     | Groups     | All | Top |
| Total           | 5509 | 7162  | 1123     | 12747 | 3058  | 2940   | 918         | 344 | 126 | 2          | 4   | 3   |
| roasted peanut  | 5509 | 7162  | 1123     | 12747 | 3058  | 2940   | 918         | 344 | 126 | 2          | 4   | 3   |

\* proteins with significant peptides are used in counts.  
\*\* features are identified by DB search only.

**Figure 3.** Sample overlap for Proteins and Peptides (up to 8 samples). **(a)** All Proteins; **(b)** Top Proteins; **(c)** Peptides; 

**(a)**

Not applicable to only one sample

**(b)**

Not applicable to only one sample

**(c)**

Not applicable to only one sample

**Figure 4.** Distribution of peptide feature detection. **(a)** Feature m/z distribution; **(b)** Feature RT distribution.

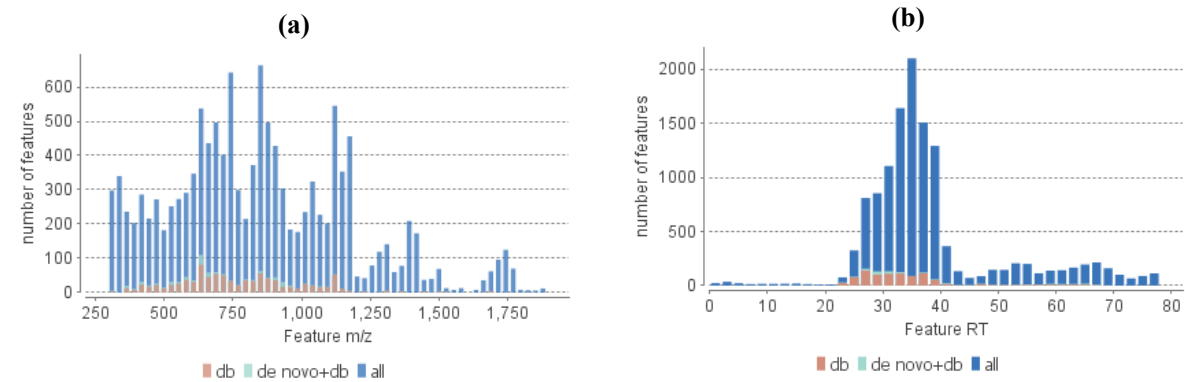

**Figure 5.** Distribution of identified peptide features. **(a)** Feature abundance distribution; **(b)** *De novo* sequencing validation. 

**(a)**

**(b)**

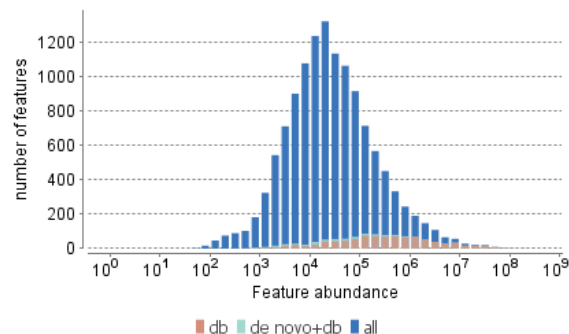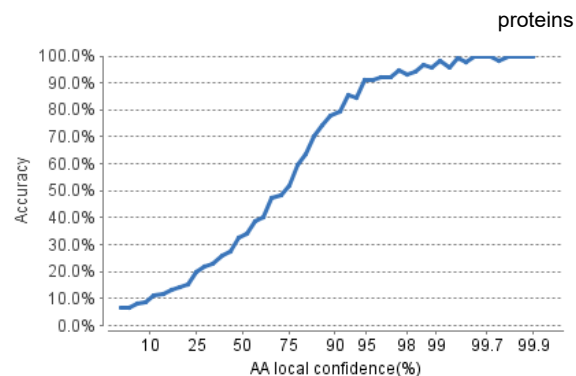**Table 2.** Result filtration parameters.

|                          |       |
|--------------------------|-------|
| Peptide -10lgP           | ≥25.5 |
| PTM AScore               | ≥50   |
| Protein -10lgP           | ≥20   |
| Proteins unique peptides | ≥2    |
| De novo score(%)         | ≥50%  |

**Table 3.** Statistics of filtered result.

|                                |      |
|--------------------------------|------|
| FDR (Peptide-Spectrum Matches) | 0.1% |
| FDR (Peptide Sequences)        | 0.9% |
| FDR (Protein Group)            | 0.0% |
| De Novo Only Spectra           | 608  |

**Table 4.** PTM profile.

| Name                | ΔMass  | Position | #PSM | -10lgP | Abundance | AScore  |
|---------------------|--------|----------|------|--------|-----------|---------|
| Carbamidomethyl     | 57.02  | C        | 303  | 116.47 | 4.22E6    | 1000.00 |
| Oxidation           | 15.99  | M        | 232  | 116.10 | 3.41E6    | 26.02   |
| Deamidation         | .98    | NQ       | 114  | 101.58 | 2.7E6     | 24.32   |
| HydPro              | 15.99  | P        | 104  | 84.52  | 1.07E7    | 41.53   |
| Methylation(KR)     | 14.02  | KR       | 46   | 85.42  | 3.72E5    | 1000.00 |
| Carbamylation       | 43.01  | K,N-term | 39   | 55.95  | 3.83E4    | 1000.00 |
| Oxidation           | 15.99  | HW       | 34   | 86.71  | 3.36E5    | 1000.00 |
| Amidine             | 41.03  | N-term   | 34   | 59.87  | 1.04E7    | 1000.00 |
| Methylation(others) | 14.02  | CDEHST   | 31   | 93.65  | 1.36E6    | 33.98   |
| Dehydration         | -18.01 | DSTY     | 27   | 68.93  | 1.92E5    | 40.00   |
| Oxidation           | 15.99  | DKNRY    | 19   | 57.68  | 3.67E5    | 51.51   |
| Dethiomethyl        | -48.00 | M        | 19   | 76.61  | 1.43E6    | 14.02   |
| Formylation         | 27.99  | K,N-term | 15   | 78.41  | 1.02E6    | 98.75   |
| Pyro-glu from E     | -18.01 | N-term   | 12   | 60.61  | 1.12E5    | 1000.00 |
| Dihydroxy           | 31.99  | RW       | 10   | 60.54  |           | 21.02   |
| Cation:Fe[II]       | 53.92  | DE       | 9    | 50.61  |           | 20.92   |
| Pyro-glu from Q     | -17.03 | N-term   | 9    | 65.43  | 2.88E4    | 1000.00 |
| Ammonia loss        | -17.03 | N        | 8    | 72.17  | 7.61E5    | 1000.00 |
| Sodium              | 21.98  | E        | 7    | 48.97  | 1.59E5    | 9.34    |
| Acetylation         | 42.01  | K        | 5    | 77.03  |           | 1000.00 |

### 3. Experiment Control

**Figure 6.** Precursor mass error of peptide-spectrum matches (PSM) in filtered result. **(a)** Distribution of precursor mass error in ppm; **(b)** Scatterplot of precursor m/z versus precursor mass error in ppm. ?

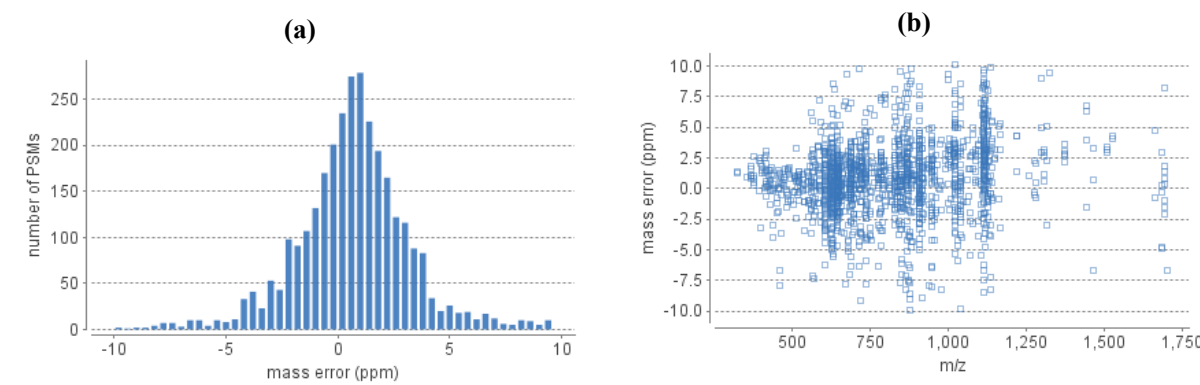

**Table 5.** Number of identified peptides in each sample by the number of missed cleavages.

|                  |     |     |    |   |    |
|------------------|-----|-----|----|---|----|
| Missed Cleavages | 0   | 1   | 2  | 3 | 4+ |
| roasted peanut   | 143 | 154 | 47 | 0 | 0  |

### 4. Other Information

**Table 6.** Search parameters.

Search Engine Name: PEAKS  
Parent Mass Error Tolerance: 10.0 ppm  
Fragment Mass Error Tolerance: 0.5 Da  
Precursor Mass Search Type: monoisotopic  
Enzyme: Trypsin  
Max Missed Cleavages: 2  
Digest Mode: Unspecific  
Fixed Modifications:  
Carbamidomethylation: 57.02  
Variable Modifications:  
Deamidation (NQ): 0.98  
Oxidation (M): 15.99  
Hydroxylation Pro: 15.99

**Table 7.** Instrument parameters.

Fractions: OB5954 H1 Ro.raw, OB5955 H1 Ro.raw, OB5956 H1 Ro.raw  
  
Ion Source: ESI(nano-spray)  
Fragmentation Mode: CID, CAD(y and b ions)  
MS Scan Mode: FT-ICR/Orbitrap  
MS/MS Scan Mode: Linear Ion Trap



Acetylation (K): 42.01  
Acetylation (Protein N-term): 42.01  
Acetylation (N-term): 42.01  
Amidation: -0.98  
Beta-methylthiolation: 45.99  
and 305 more...  
Max Variable PTM Per Peptide: 5  
Database: Uniprot\_Peanut-3818\_Jul18  
Taxon: All  
Contaminant Database: contaminantsMQ\_mar19  
Searched Entry: 1723  
FDR Estimation: Enabled  
De novo score(%) threshold: 15  
Peptide hit threshold (-10logP): 30.0  
Peaks run ID: 15  
Merge Options: no merge  
Precursor Options: corrected  
Charge Options: no correction  
Filter Charge: 2 - 15  
Process: true  
Associate chimera: yes

Protein List

Protein Accession Contains:  
Protein Description Contains:  
Protein Sample Area >=  
Protein PTM Contains:

| Protein Group    | Protein ID | Accession              | -10lgP | Coverage (%) | Coverage (%) roasted peanut | Area roasted peanut | #Peptides | #Unique | #Spec roasted peanut | PTM | Avg. Mass | Description                                                        |
|------------------|------------|------------------------|--------|--------------|-----------------------------|---------------------|-----------|---------|----------------------|-----|-----------|--------------------------------------------------------------------|
| 2                | 3          | P43237 ALL11_ARAHY     | 493.02 | 64           | 64                          | 1.2143E8            | 93        | 10      | 2819                 | Y   | 70283     | Allergen Ara h 1, clone P17 OS=Arachis hypogaea OX=3818 PE=1 S V=1 |
| 2                | 2          | tr B3IXL2 B3IXL2_ARAHY | 493.02 | 64           | 64                          | 1.2143E8            | 93        | 10      | 2819                 | Y   | 70283     | Main allergen Ara h1 OS=Arachis hypogaea OX=3818 PE=2 SV=1         |
| 4                | 7          | tr E5G076 E5G076_ARAHY | 440.15 | 48           | 48                          | 3.4977E6            | 58        | 3       | 1319                 | Y   | 70788     | Ara h 1 allergen OS=Arachis hypogaea OX=3818 GN=ara h 1 PE=4 SV=1  |
| total 3 proteins |            |                        |        |              |                             |                     |           |         |                      |     |           |                                                                    |

P43237|ALL11\_ARAHY

[back to list](#)

| [Protein Coverage](#) | [Supporting Peptides](#) |

Protein Coverage:

1 MRGRVSPLML LLGILVLASV SATQAKSPYR KTENPCAQRC LQSCQQEPDD LKQKACESRC TKLEYDPRCV YDTGATNQRH

81 PPGERTGRQ PGDYDDRRQ PRREEGGRWG PAEPRERERE E EDWRQPREDW RRP SHQQPRK IRPEGREGEQ EWGTPGSEVR

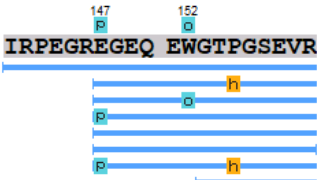

- Acetylation (K) (+42.01)
- Amidation (-0.98)
- Amidation of lysines or N-terminal amines with methyl acetimidate (+41.03)
- Ammonia-loss (N) (-17.03)
- Biotinylation (+226.08)
- Carbamidomethylation (+57.02)
- Carbamylation (+43.01)
- Carboxymethyl (+58.01)
- Deamidation (NQ) (+0.98)
- Dehydration (-18.01)
- Dimethylation(KR) (+28.03)

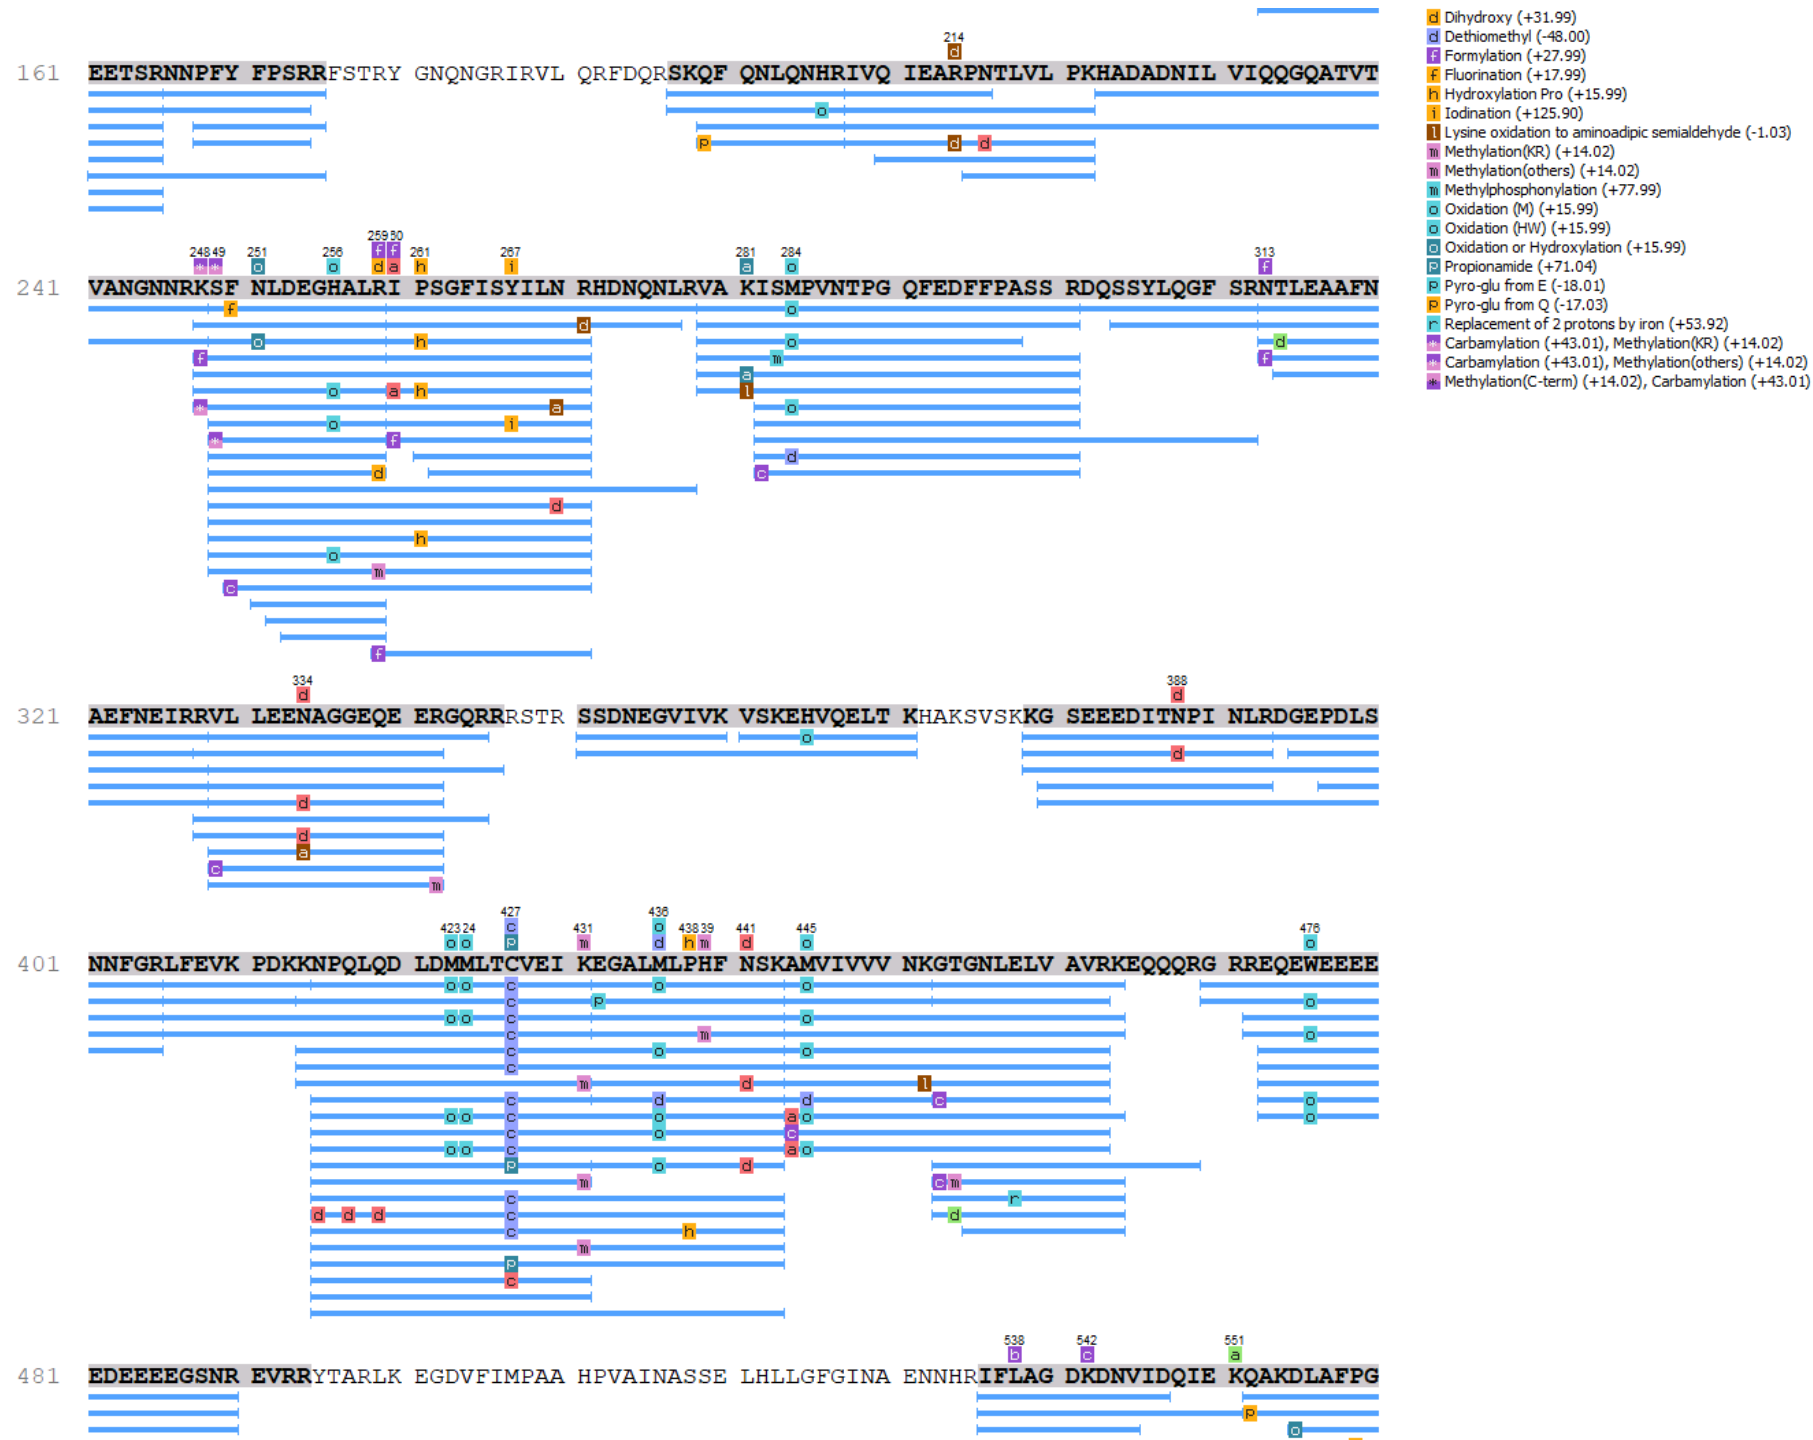

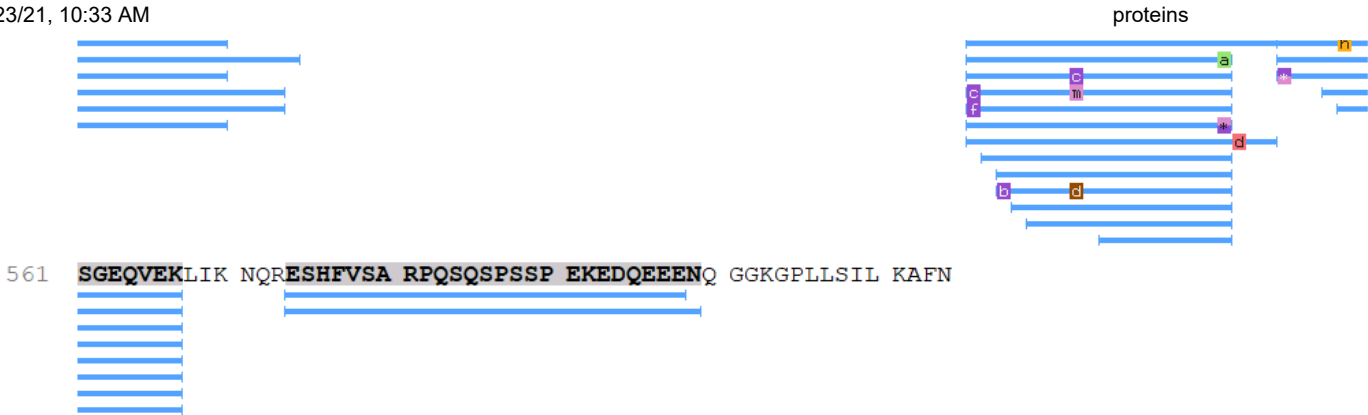

Supporting Peptides:

| Peptide                               | Uniq | -10lgP | Mass      | Length | ppm  | m/z       | z | RT    | Fraction | Scan    | Source File      | Area roasted peanut | #Feature | #Feature roasted peanut | Start | End | PTM                  | AScore                                                  | Found By |
|---------------------------------------|------|--------|-----------|--------|------|-----------|---|-------|----------|---------|------------------|---------------------|----------|-------------------------|-------|-----|----------------------|---------------------------------------------------------|----------|
| R.EQEWEEEEEEEEEGSNR.E                 | N    | 117.09 | 2280.8413 | 18     | 3.3  | 1141.4316 | 2 | 28.28 | 5        | F5:1371 | OB5955 H1 Ro.raw | 4.6914E6            | 7        | 7                       | 473   | 490 |                      |                                                         | PEAKS DB |
| K.KNPQLQDLDMMLTC(+57.02)VEIK.E        | N    | 116.47 | 2175.0737 | 18     | 3.2  | 1088.5476 | 2 | 35.21 | 5        | F5:1788 | OB5955 H1 Ro.raw | 1.5503E7            | 6        | 6                       | 414   | 431 | Carbamidomethylation | C14:Carbamidomethylation:1000.00                        | PEAKS DB |
| K.NPQLQDLDM(+15.99)LTC(+57.02)VEIK.E  | N    | 116.10 | 2062.9736 | 17     | 5.0  | 1032.4993 | 2 | 34.71 | 6        | F6:1780 | OB5956 H1 Ro.raw | 1.155E7             | 4        | 4                       | 415   | 431 | Carbamidomethylation | M10:Oxidation(M):30.46;C13:Carbamidomethylation:1000.00 | PEAKS DB |
| K.NPQLQDLDM(+15.99)MLTC(+57.02)VEIK.E | N    | 115.70 | 2062.9736 | 17     | -4.7 | 1032.4893 | 2 | 36.62 | 4        | F4:1873 | OB5954 H1 Ro.raw | 3.8486E6            | 3        | 3                       | 415   | 431 | Carbamidomethylation | M9:Oxidation(M):30.46;C13:Carbamidomethylation:1000.00  | PEAKS DB |
| K.NPQLQDLDMMLTC(+57.02)VEIK.E         | N    | 112.86 | 2046.9788 | 17     | 0.2  | 1024.4968 | 2 | 37.11 | 6        | F6:1959 | OB5956 H1 Ro.raw | 3.5075E7            | 10       | 10                      | 415   | 431 | Carbamidomethylation | C13:Carbamidomethylation:1000.00                        | PEAKS DB |
| R.NTLEAAFNAEFNEIR.R                   | N    | 112.69 | 1737.8322 | 15     | 1.4  | 869.9246  | 2 | 35.64 | 6        | F6:1825 | OB5956 H1 Ro.raw | 1.2023E7            | 6        | 6                       | 313   | 327 |                      |                                                         | PEAKS DB |
| K.ISM(+15.99)PVNTPGQFEDFFPASSR.D      | N    | 109.35 | 2242.0364 | 20     | 8.1  | 1122.0345 | 2 | 34.52 | 6        | F6:1771 | OB5956 H1 Ro.raw | 2.1717E7            | 8        | 8                       | 282   | 301 | Oxidation (M)        | M3:Oxidation(M):1000.00                                 | PEAKS DB |
| K.ISMPVNTPGQFEDFFPASSR.D              | N    | 107.77 | 2226.0415 | 20     | 0.9  | 1114.0291 | 2 | 35.86 | 4        | F4:1823 | OB5954 H1 Ro.raw | 8.7375E7            | 15       | 15                      | 282   | 301 |                      |                                                         | PEAKS DB |
| K.HADADNILVIQQGQATVTVANGNNRK.S        | N    | 104.88 | 2746.4111 | 26     | 3.3  | 916.4807  | 3 | 29.36 | 4        | F4:1435 | OB5954 H1 Ro.raw | 3.9035E6            | 4        | 4                       | 223   | 248 |                      |                                                         | PEAKS DB |

total 287 peptides

| Peptide                                       | Uniq | -10lgP | Mass      | Length | ppm  | m/z       | z | RT    | Fraction | Scan    | Source File            | Area roasted peanut | #Feature | #Feature roasted peanut | Start | End | PTM                                 | AScore                                                                                | Found By |
|-----------------------------------------------|------|--------|-----------|--------|------|-----------|---|-------|----------|---------|------------------------|---------------------|----------|-------------------------|-------|-----|-------------------------------------|---------------------------------------------------------------------------------------|----------|
| K.KGSEEDITNPINLRDGEPLDLSNNFR.L                | N    | 103.39 | 3015.4170 | 27     | 3.4  | 1006.1497 | 3 | 31.62 | 4        | F4:1565 | OB5954<br>H1<br>Ro.raw | 1.1819E7            | 10       | 10                      | 379   | 405 |                                     |                                                                                       | PEAKS DB |
| K.KNPQLQLDLM(+15.99)MLTC(+57.02)VEIK.E        | N    | 103.13 | 2191.0686 | 18     | 3.6  | 1096.5455 | 2 | 34.71 | 6        | F6:1781 | OB5956<br>H1<br>Ro.raw | 1.4412E6            | 4        | 4                       | 414   | 431 | Carbamidomethylation                | M10:Oxidation (M):27.96;C14:Carbamidomethylation:1000.00                              | PEAKS DB |
| R.IFLAGDKDNVIDQIEK.Q                          | N    | 102.67 | 1816.9570 | 16     | 6.5  | 909.4917  | 2 | 32.54 | 4        | F4:1630 | OB5954<br>H1<br>Ro.raw | 4.3939E8            | 47       | 47                      | 536   | 551 |                                     |                                                                                       | PEAKS DB |
| K.HADADNLIQGGQATVTVAN(+.98)GNNRK.S            | N    | 101.58 | 2747.3950 | 26     | 3.3  | 916.8086  | 3 | 29.66 | 4        | F4:1454 | OB5954<br>H1<br>Ro.raw | 4.7756E6            | 7        | 7                       | 223   | 248 |                                     | N21:Deamidation (N/Q):31.91                                                           | PEAKS DB |
| K.AMVVVVVKGTGNLELVAVR.K                       | N    | 99.57  | 2081.2031 | 20     | -0.4 | 1041.6084 | 2 | 34.57 | 4        | F4:1751 | OB5954<br>H1<br>Ro.raw | 3.4777E7            | 8        | 8                       | 444   | 463 |                                     |                                                                                       | PEAKS DB |
| K.GSEEDITNPINLRDGEPLDLSNNFR.L                 | N    | 98.43  | 2887.3220 | 26     | -0.7 | 963.4473  | 3 | 32.67 | 6        | F6:1660 | OB5956<br>H1<br>Ro.raw | 1.2511E7            | 5        | 5                       | 380   | 405 |                                     |                                                                                       | PEAKS DB |
| K.SFNLDEGHALR.I                               | N    | 97.07  | 1257.6101 | 11     | 3.0  | 629.8142  | 2 | 28.04 | 4        | F4:1388 | OB5954<br>H1<br>Ro.raw | 1.1757E8            | 21       | 21                      | 249   | 259 |                                     |                                                                                       | PEAKS DB |
| K.NPQLQLDLM(+15.99)M(+15.99)LTC(+57.02)VEIK.E | N    | 96.89  | 2078.9688 | 17     | 6.6  | 1040.4985 | 2 | 33.82 | 6        | F6:1726 | OB5956<br>H1<br>Ro.raw | 7.6578E4            | 2        | 2                       | 415   | 431 | Oxidation (M); Carbamidomethylation | M9:Oxidation (M):1000.00; M10:Oxidation (M):1000.00; C13:Carbamidomethylation:1000.00 | PEAKS DB |
| K.AM(+15.99)VIVVVVVKGTGNLELVAVR.K             | N    | 96.06  | 2097.1980 | 20     | 3.4  | 1049.6099 | 2 | 32.98 | 5        | F5:1656 | OB5955<br>H1<br>Ro.raw | 2.4028E7            | 6        | 6                       | 444   | 463 | Oxidation (M)                       | M2:Oxidation (M):1000.00                                                              | PEAKS DB |
| R.VLLEENAGGEQEER.G                            | N    | 95.38  | 1571.7427 | 14     | 2.2  | 786.8804  | 2 | 26.92 | 4        | F4:1300 | OB5954<br>H1<br>Ro.raw | 3.043E7             | 6        | 6                       | 329   | 342 |                                     |                                                                                       | PEAKS DB |
| K.KNPQLQLDMM(+15.99)LTC(+57.02)VEIK.E         | N    | 95.29  | 2191.0686 | 18     | 3.1  | 1096.5449 | 2 | 32.98 | 5        | F5:1657 | OB5955<br>H1<br>Ro.raw | 1.9358E6            | 4        | 4                       | 414   | 431 | Carbamidomethylation                | M11:Oxidation (M):23.10;C14:Carbamidomethylation:1000.00                              | PEAKS DB |
| K.SFNLDEGHALRIPSGFISYILNR.H                   | N    | 95.27  | 2618.3604 | 23     | 1.9  | 873.7957  | 3 | 37.65 | 6        | F6:1935 | OB5956<br>H1<br>Ro.raw | 7.1821E7            | 11       | 11                      | 249   | 271 |                                     |                                                                                       | PEAKS DB |
| R.DQSSYLQGFSR.N                               | N    | 94.26  | 1286.5891 | 11     | -0.9 | 644.3013  | 2 | 30.91 | 4        | F4:1531 | OB5954<br>H1<br>Ro.raw | 9.6573E7            | 19       | 19                      | 302   | 312 |                                     |                                                                                       | PEAKS DB |
| R.RVLLEENAGGEQEER.G                           | N    | 93.77  | 1727.8438 | 15     | 0.2  | 576.9553  | 3 | 25.30 | 5        | F5:1185 | OB5955<br>H1<br>Ro.raw | 8.7628E5            | 6        | 6                       | 328   | 342 |                                     |                                                                                       | PEAKS DB |

total 287 peptides

| Peptide                                           | Uniq | -10lgP | Mass      | Length | ppm  | m/z       | z | RT    | Fraction | Scan    | Source File      | Area roasted peanut | #Feature | #Feature roasted peanut | Start | End | PTM                  | AScore                                                  | Found By  |
|---------------------------------------------------|------|--------|-----------|--------|------|-----------|---|-------|----------|---------|------------------|---------------------|----------|-------------------------|-------|-----|----------------------|---------------------------------------------------------|-----------|
| K.NPQLQDLDMMLTC(+14.02)VEIK.E                     | N    | 93.65  | 2003.9730 | 17     | 2.7  | 1002.9965 | 2 | 38.33 | 5        | F5:1965 | OB5955 H1 Ro.raw | 5.8314E6            | 4        | 4                       | 415   | 431 |                      | C13:Methylation(others):33.98                           | PEAKS PTM |
| R.IFLAGDKDNVIDQIEKQAK.D                           | N    | 92.18  | 2144.1477 | 19     | -2.1 | 715.7217  | 3 | 32.42 | 5        | F5:1625 | OB5955 H1 Ro.raw | 1.615E6             | 3        | 3                       | 536   | 554 |                      |                                                         | PEAKS DB  |
| R.IPSGFISYILNR.H                                  | N    | 92.13  | 1378.7609 | 12     | 1.1  | 690.3885  | 2 | 37.47 | 6        | F6:1945 | OB5956 H1 Ro.raw | 4.5588E8            | 9        | 9                       | 260   | 271 |                      |                                                         | PEAKS DB  |
| K.AMVIVVNVKGTGNLELVAVRK.E                         | N    | 91.52  | 2209.2981 | 21     | 4.7  | 737.4434  | 3 | 32.59 | 4        | F4:1633 | OB5954 H1 Ro.raw | 1.2306E8            | 14       | 14                      | 444   | 464 |                      |                                                         | PEAKS DB  |
| R.KSFNLDEGHALR.I                                  | N    | 88.41  | 1385.7051 | 12     | 1.3  | 693.8607  | 2 | 26.06 | 5        | F5:1228 | OB5955 H1 Ro.raw | 5.4977E6            | 6        | 6                       | 248   | 259 |                      |                                                         | PEAKS DB  |
| R.REQEWEEEEEEEEGSNR.E                             | N    | 88.08  | 2436.9424 | 19     | 0.6  | 813.3219  | 3 | 26.73 | 4        | F4:1278 | OB5954 H1 Ro.raw | 9.3919E5            | 7        | 7                       | 472   | 490 |                      |                                                         | PEAKS DB  |
| R.EQEW(+15.99)EEEEEEEEEGSNR.E                     | N    | 86.71  | 2296.8362 | 18     | 2.5  | 1149.4282 | 2 | 27.64 | 6        | F6:1309 | OB5956 H1 Ro.raw | 1.0675E6            | 3        | 3                       | 473   | 490 | Oxidation (HW)       | W4:Oxidation (HW):1000.00                               | PEAKS PTM |
| K.KGSEEDITNPINLR.D                                | N    | 86.46  | 1713.8533 | 15     | 4.2  | 857.9375  | 2 | 29.29 | 4        | F4:1432 | OB5954 H1 Ro.raw | 8.9159E6            | 6        | 6                       | 379   | 393 |                      |                                                         | PEAKS DB  |
| K.NPQLQDLDM(+15.99)MLTCVEIK(+14.02).E             | N    | 85.42  | 2019.9679 | 17     | 2.2  | 1010.9934 | 2 | 37.33 | 4        | F4:1920 | OB5954 H1 Ro.raw | 7.9299E5            | 2        | 2                       | 415   | 431 | Methylation(KR)      | M9:Oxidation (M):21.94;K17:Methylation (KR):1000.00     | PEAKS PTM |
| K.DLAFPGSGEQVEK.L                                 | N    | 85.27  | 1375.6619 | 13     | -0.7 | 688.8377  | 2 | 30.39 | 4        | F4:1498 | OB5954 H1 Ro.raw | 9.2216E7            | 3        | 3                       | 555   | 567 |                      |                                                         | PEAKS DB  |
| R.VLLEEN(+.98)AGGEQEER.G                          | N    | 85.22  | 1572.7267 | 14     | 2.8  | 787.3728  | 2 | 27.46 | 6        | F6:1340 | OB5956 H1 Ro.raw | 6.8644E5            | 3        | 3                       | 329   | 342 | Deamidation (NQ)     | N6:Deamidation (NQ):121.37                              | PEAKS DB  |
| K.NPQLQDLDMMLTC(+57.02)VEIKEGALMLPHFNSK.A         | N    | 85.17  | 3371.6387 | 29     | -4.9 | 1686.8184 | 2 | 38.00 | 5        | F5:1955 | OB5955 H1 Ro.raw | 1.5541E8            | 10       | 10                      | 415   | 443 | Carbamidomethylation | C13:Carbamidomethylation:1000.00                        | PEAKS DB  |
| R.DGEPDLSNNFGR.L                                  | N    | 84.59  | 1319.5742 | 12     | 0.6  | 660.7948  | 2 | 29.29 | 4        | F4:1422 | OB5954 H1 Ro.raw | 7.8399E6            | 3        | 3                       | 394   | 405 |                      |                                                         | PEAKS DB  |
| K.ISMP(+15.99)VNTPGQFEDFFPASSR.D                  | N    | 84.52  | 2242.0364 | 20     | -2.0 | 1122.0232 | 2 | 34.47 | 5        | F5:1814 | OB5955 H1 Ro.raw | 1.0743E7            | 2        | 2                       | 282   | 301 |                      | P4:Hydroxylation Pro:42.89                              | PEAKS DB  |
| R.EGEQEWGTPGSEVREETSR.N                           | Y    | 84.24  | 2161.9512 | 19     | 4.4  | 1081.9877 | 2 | 27.86 | 4        | F4:1344 | OB5954 H1 Ro.raw | 4.0932E7            | 7        | 7                       | 147   | 165 |                      |                                                         | PEAKS DB  |
| K.NPQLQDLDM(+15.99)MLTC(+57.02)VEIKEGALMLPHFNSK.A | N    | 83.17  | 3387.6335 | 29     | -0.6 | 1130.2178 | 3 | 37.70 | 4        | F4:1939 | OB5954 H1 Ro.raw | 9.055E7             | 6        | 6                       | 415   | 443 | Carbamidomethylation | M9:Oxidation (M):26.02;C13:Carbamidomethylation:1000.00 | PEAKS DB  |

total 287 peptides

| Peptide                                    | Uniq | -10lgP | Mass      | Length | ppm  | m/z       | z | RT    | Fraction | Scan    | Source File      | Area roasted peanut | #Feature | #Feature roasted peanut | Start | End | PTM                  | AScore                                                 | Found By  |
|--------------------------------------------|------|--------|-----------|--------|------|-----------|---|-------|----------|---------|------------------|---------------------|----------|-------------------------|-------|-----|----------------------|--------------------------------------------------------|-----------|
| R.NTLEAAFAEFNEIRR.V                        | N    | 81.08  | 1893.9332 | 16     | -2.6 | 947.9714  | 2 | 34.11 | 5        | F5:1711 | OB5955 H1 Ro.raw | 2.8495E8            | 15       | 15                      | 313   | 328 |                      |                                                        | PEAKS DB  |
| R.GRREQEWEEEEEEEGSNR.E                     | N    | 80.86  | 2650.0649 | 21     | 1.1  | 884.3632  | 3 | 26.73 | 4        | F4:1280 | OB5954 H1 Ro.raw | 8.7144E5            | 6        | 6                       | 470   | 490 |                      |                                                        | PEAKS DB  |
| R.EGEQEWGTPGSEVR.E                         | Y    | 80.82  | 1559.6852 | 14     | 1.4  | 780.8510  | 2 | 28.04 | 4        | F4:1358 | OB5954 H1 Ro.raw | 3.4069E6            | 3        | 3                       | 147   | 160 |                      |                                                        | PEAKS DB  |
| K.EGALMLPHFNSK.A                           | N    | 80.31  | 1342.6703 | 12     | 2.3  | 672.3440  | 2 | 30.63 | 5        | F5:1504 | OB5955 H1 Ro.raw | 1.4317E7            | 5        | 5                       | 432   | 443 |                      |                                                        | PEAKS DB  |
| K.SFNLDEGH(+15.99)ALR.I                    | N    | 80.04  | 1273.6051 | 11     | -0.5 | 637.8095  | 2 | 30.29 | 4        | F4:1491 | OB5954 H1 Ro.raw | 9.1981E5            | 2        | 2                       | 249   | 259 | Oxidation (HW)       | H8:Oxidation (HW):1000.00                              | PEAKS PTM |
| R.LFEVKPKDKNPQLQDLDMMLTC(+57.02)VEIK.E     | N    | 78.90  | 3131.6069 | 26     | -4.0 | 1044.8721 | 3 | 34.65 | 5        | F5:1756 | OB5955 H1 Ro.raw | 5.2558E6            | 4        | 4                       | 406   | 431 | Carbamidomethylation | C22:Carbamidomethylation:1000.00                       | PEAKS DB  |
| R.I(+27.99)FLAGDKDNVIDQIEK.Q               | N    | 78.41  | 1844.9519 | 16     | -2.1 | 923.4813  | 2 | 36.23 | 4        | F4:1853 | OB5954 H1 Ro.raw | 2.4413E6            | 3        | 3                       | 536   | 551 | Formylation          | I1:Formylation:98.75                                   | PEAKS PTM |
| K.GSEEDITNPINLR.D                          | N    | 78.13  | 1585.7583 | 14     | 2.3  | 793.8882  | 2 | 31.16 | 5        | F5:1548 | OB5955 H1 Ro.raw | 3.4694E6            | 3        | 3                       | 380   | 393 |                      |                                                        | PEAKS DB  |
| F.LAGDKDNVIDQIEK.Q                         | N    | 78.02  | 1556.8046 | 14     | -6.3 | 779.4047  | 2 | 32.21 | 6        | F6:1629 | OB5956 H1 Ro.raw | 5.4762E6            | 4        | 4                       | 538   | 551 |                      |                                                        | PEAKS DB  |
| K.AMVIVVVK.G                               | N    | 77.85  | 971.5837  | 9      | -0.8 | 486.7987  | 2 | 30.10 | 5        | F5:1540 | OB5955 H1 Ro.raw | 7.1402E6            | 3        | 3                       | 444   | 452 |                      |                                                        | PEAKS DB  |
| R.VAK(+42.01)ISMPVNTPGQFEDFFPASSR.D        | N    | 77.03  | 2566.2524 | 23     | 0.5  | 1284.1342 | 2 | 36.43 | 6        | F6:1881 | OB5956 H1 Ro.raw | 0                   | 0        | 0                       | 279   | 301 | Acetylation (K)      | K3:Acetylation (K):1000.00                             | PEAKS PTM |
| K.NPQLQDLDMMLTC(+57.02)VEIK.E              | N    | 76.61  | 1998.9755 | 17     | 1.9  | 1000.4969 | 2 | 32.85 | 6        | F6:1670 | OB5956 H1 Ro.raw | 6.204E6             | 3        | 3                       | 415   | 431 | Carbamidomethylation | M10:Deamidation:14.02;C13:Carbamidomethylation:1000.00 | PEAKS PTM |
| K.ISMPVNTP(+15.99)GQFEDFFPASSR.D           | N    | 75.57  | 2242.0364 | 20     | 1.5  | 1122.0271 | 2 | 35.64 | 6        | F6:1836 | OB5956 H1 Ro.raw | 1.0022E6            | 1        | 1                       | 282   | 301 |                      | P8:Hydroxylation Pro:10.93                             | PEAKS DB  |
| K.EGALMLPHFN(+.98)SK.A                     | N    | 75.32  | 1343.6543 | 12     | 2.6  | 672.8362  | 2 | 31.66 | 6        | F6:1595 | OB5956 H1 Ro.raw | 1.7726E5            | 2        | 2                       | 432   | 443 | Deamidation (NQ)     | N10:Deamidation (NQ):1000.00                           | PEAKS DB  |
| R.VAKISMPVNTPGQFEDFFPASSR.D                | N    | 75.04  | 2524.2419 | 23     | -2.9 | 842.4188  | 3 | 34.29 | 5        | F5:1735 | OB5955 H1 Ro.raw | 1.671E6             | 3        | 3                       | 279   | 301 |                      |                                                        | PEAKS DB  |
| K.KNPQLQDLDMMLTC(+57.02)VEIKEGALMLPHFNSK.A | N    | 74.64  | 3499.7336 | 30     | -3.9 | 875.9373  | 4 | 36.80 | 4        | F4:1884 | OB5954 H1 Ro.raw | 6.9756E6            | 4        | 4                       | 414   | 443 | Carbamidomethylation | C14:Carbamidomethylation:1000.00                       | PEAKS DB  |

total 287 peptides

| Peptide                                                   | Uniq | -10lgP | Mass      | Length | ppm  | m/z      | z | RT    | Fraction | Scan    | Source File      | Area roasted peanut | #Feature | #Feature roasted peanut | Start | End | PTM                                 | AScore                                                                            | Found By  |
|-----------------------------------------------------------|------|--------|-----------|--------|------|----------|---|-------|----------|---------|------------------|---------------------|----------|-------------------------|-------|-----|-------------------------------------|-----------------------------------------------------------------------------------|-----------|
| R.NTLEAAFN(+.98)AEFNEIRR.V                                | N    | 74.52  | 1894.9172 | 16     | -2.2 | 948.4638 | 2 | 32.35 | 4        | F4:1616 | OB5954 H1 Ro.raw | 1.3754E6            | 3        | 3                       | 313   | 328 |                                     | N8:Deamidation (NQ):48.12                                                         | PEAKS DB  |
| R.KSFNLDEGHALRIPSGFISYILNR.H                              | N    | 73.99  | 2746.4553 | 24     | 0.1  | 687.6212 | 4 | 36.45 | 5        | F5:1860 | OB5955 H1 Ro.raw | 1.0287E6            | 2        | 2                       | 248   | 271 |                                     |                                                                                   | PEAKS DB  |
| R.EETSRN(+.98)NPFYFSRR.F                                  | N    | 73.61  | 1899.8864 | 15     | -0.2 | 634.3026 | 3 | 28.39 | 4        | F4:1381 | OB5954 H1 Ro.raw | 5.4651E5            | 3        | 3                       | 161   | 175 |                                     | N6:Deamidation (NQ):33.98                                                         | PEAKS DB  |
| R.RVLEENAGGEQEERGQR.R                                     | N    | 73.30  | 2069.0249 | 18     | 1.9  | 690.6835 | 3 | 25.60 | 4        | F4:1205 | OB5954 H1 Ro.raw | 1.8274E6            | 3        | 3                       | 328   | 345 |                                     |                                                                                   | PEAKS DB  |
| K.GTGNLVLVAVR.K                                           | N    | 72.98  | 1127.6299 | 11     | -1.3 | 564.8215 | 2 | 30.21 | 4        | F4:1476 | OB5954 H1 Ro.raw | 2.4766E7            | 4        | 4                       | 453   | 463 |                                     |                                                                                   | PEAKS DB  |
| K.EGALM(+15.99)LPHFNSK.A                                  | N    | 72.82  | 1358.6653 | 12     | -0.5 | 680.3396 | 2 | 30.10 | 5        | F5:1469 | OB5955 H1 Ro.raw | 3.1504E6            | 5        | 5                       | 432   | 443 | Oxidation (M)                       | M5:Oxidation (M):1000.00                                                          | PEAKS DB  |
| R.IPSGFISYILN(-17.03)R.H                                  | N    | 72.17  | 1361.7343 | 12     | -0.6 | 681.8740 | 2 | 38.07 | 4        | F4:1963 | OB5954 H1 Ro.raw | 1.5056E6            | 3        | 3                       | 260   | 271 | Ammonia-loss (N)                    | N11:Ammonia-loss (N):1000.00                                                      | PEAKS PTM |
| R.IFLAGDKDNVIDQIEKQ(+.98)AK.D                             | N    | 71.42  | 2145.1316 | 19     | 1.5  | 716.0522 | 3 | 33.08 | 5        | F5:1661 | OB5955 H1 Ro.raw | 0                   | 0        | 0                       | 536   | 554 |                                     | Q17:Deamidation (NQ):48.83                                                        | PEAKS DB  |
| R.IPSGFISYILNRHDNQNLR.V                                   | N    | 71.19  | 2256.1763 | 19     | 6.5  | 753.0709 | 3 | 33.61 | 6        | F6:1714 | OB5956 H1 Ro.raw | 5.9166E7            | 10       | 10                      | 260   | 278 |                                     |                                                                                   | PEAKS DB  |
| K.GTGNLVLVAVRK.E                                          | N    | 70.92  | 1255.7249 | 12     | 0.7  | 628.8701 | 2 | 27.30 | 4        | F4:1290 | OB5954 H1 Ro.raw | 2.2945E7            | 7        | 7                       | 453   | 464 |                                     |                                                                                   | PEAKS DB  |
| K.KNPQLQDLDMMLTC(+57.02)VEIKEGALM(+15.99)LPHFNSK.A        | N    | 70.54  | 3515.7285 | 30     | -1.9 | 879.9377 | 4 | 36.03 | 6        | F6:1857 | OB5956 H1 Ro.raw | 6.9145E6            | 3        | 3                       | 414   | 443 | Carbamidomethylation; Oxidation (M) | C14:Carbamidomethylation:1000.00; M23:Oxidation (M):107.40                        | PEAKS DB  |
| K.NPQLQDLDM(+15.99)MLTC(+57.02)VEIKEGALM(+15.99)LPHFNSK.A | N    | 70.15  | 3403.6284 | 29     | 1.1  | 851.9153 | 4 | 37.51 | 4        | F4:1883 | OB5954 H1 Ro.raw | 7.9309E6            | 6        | 6                       | 415   | 443 | Carbamidomethylation; Oxidation (M) | M9:Oxidation (M):27.96; C13:Carbamidomethylation:1000.00; M22:Oxidation (M):71.31 | PEAKS DB  |
| R.VLLEENAGGEQEERGQR.R                                     | N    | 69.54  | 1912.9238 | 17     | 0.6  | 957.4698 | 2 | 25.30 | 5        | F5:1191 | OB5955 H1 Ro.raw | 3.4466E6            | 6        | 6                       | 329   | 345 |                                     |                                                                                   | PEAKS DB  |
| I.PSGFISYILNR.H                                           | N    | 69.26  | 1265.6768 | 11     | -5.5 | 633.8422 | 2 | 36.68 | 4        | F4:1876 | OB5954 H1 Ro.raw | 3.6428E5            | 2        | 2                       | 261   | 271 |                                     |                                                                                   | PEAKS DB  |

total 287 peptides

| Peptide                                          | Uniq | -10lgP | Mass      | Length | ppm  | m/z       | z | RT    | Fraction | Scan    | Source File      | Area roasted peanut | #Feature | #Feature roasted peanut | Start | End | PTM                  | AScore                                                   | Found By  |
|--------------------------------------------------|------|--------|-----------|--------|------|-----------|---|-------|----------|---------|------------------|---------------------|----------|-------------------------|-------|-----|----------------------|----------------------------------------------------------|-----------|
| R.DQS(-18.01)SYLQGFSR.N                          | N    | 68.93  | 1268.5785 | 11     | 0.2  | 635.2966  | 2 | 30.91 | 4        | F4:1537 | OB5954 H1 Ro.raw | 6.7379E5            | 3        | 3                       | 302   | 312 |                      | S3:Dehydration:40.00                                     | PEAKS PTM |
| R.IP(+15.99)SGFISYILNR.H                         | N    | 68.69  | 1394.7557 | 12     | 1.5  | 698.3862  | 2 | 37.24 | 5        | F5:1913 | OB5955 H1 Ro.raw | 6.9724E6            | 9        | 9                       | 260   | 271 | Hydroxylation Pro    | P2:Hydroxylation Pro:1000.00                             | PEAKS DB  |
| K.NPQLQLDMM(+15.99)LTC(+57.02)VEIKEGALMLPHFNSK.A | N    | 68.62  | 3387.6335 | 29     | -0.8 | 1130.2175 | 3 | 36.42 | 4        | F4:1862 | OB5954 H1 Ro.raw | 7.1368E7            | 6        | 6                       | 415   | 443 | Carbamidomethylation | M10:Oxidation (M):24.44;C13:Carbamidomethylation:1000.00 | PEAKS DB  |
| R.RVLLEEN(+.98)AGGEQEER.G                        | N    | 68.51  | 1728.8278 | 15     | -0.8 | 577.2827  | 3 | 25.96 | 5        | F5:1233 | OB5955 H1 Ro.raw | 1.3591E4            | 2        | 2                       | 328   | 342 | Deamidation (NQ)     | N7:Deamidation (NQ):77.53                                | PEAKS DB  |
| R.VAKISM(+15.99)PVNTPGQFEDFFPASSR.D              | N    | 68.50  | 2540.2368 | 23     | 2.1  | 847.7546  | 3 | 32.98 | 5        | F5:1665 | OB5955 H1 Ro.raw | 5.6098E5            | 2        | 2                       | 279   | 301 | Oxidation (M)        | M6:Oxidation (M):1000.00                                 | PEAKS DB  |
| R.NNPFYFPSR.R                                    | N    | 68.49  | 1140.5352 | 9      | 0.9  | 571.2754  | 2 | 31.81 | 4        | F4:1575 | OB5954 H1 Ro.raw | 1.7544E7            | 5        | 5                       | 166   | 174 |                      |                                                          | PEAKS DB  |
| K.NPQLQLDMMMLTCVEIK(+14.02)EGALMLPHFNSK.A        | N    | 68.29  | 3328.6328 | 29     | 0.9  | 833.1663  | 4 | 38.52 | 5        | F5:1986 | OB5955 H1 Ro.raw | 1.7448E7            | 6        | 6                       | 415   | 443 | Methylation(KR)      | K17:Methylation(KR):98.15                                | PEAKS PTM |
| R.NNPFYFPSRR.F                                   | N    | 67.62  | 1296.6364 | 10     | 0.0  | 649.3254  | 2 | 28.95 | 4        | F4:1567 | OB5954 H1 Ro.raw | 1.3432E8            | 8        | 8                       | 166   | 175 |                      |                                                          | PEAKS DB  |
| R.EETSRNNPFYFPSRR.F                              | N    | 67.58  | 1898.9023 | 15     | 1.8  | 633.9759  | 3 | 27.75 | 5        | F5:1339 | OB5955 H1 Ro.raw | 9.3426E5            | 3        | 3                       | 161   | 175 |                      |                                                          | PEAKS DB  |
| R.IVQIEARPNTLVLPK.H                              | Y    | 67.30  | 1690.0140 | 15     | 0.3  | 846.0145  | 2 | 30.46 | 5        | F5:1502 | OB5955 H1 Ro.raw | 4.7655E7            | 8        | 8                       | 208   | 222 |                      |                                                          | PEAKS DB  |
| K.KNPQLQLDMMMLTCVEIK(+14.02).E                   | N    | 66.83  | 2132.0679 | 18     | -0.6 | 1067.0405 | 2 | 36.31 | 4        | F4:1858 | OB5954 H1 Ro.raw | 6.1629E5            | 2        | 2                       | 414   | 431 | Methylation(KR)      | K18:Methylation(KR):130.57                               | PEAKS PTM |
| R.IPSGFISY(+125.90)ILNR.H                        | N    | 65.90  | 1504.6575 | 12     | -1.9 | 753.3346  | 2 | 38.39 | 6        | F6:2001 | OB5956 H1 Ro.raw | 2.2019E5            | 2        | 2                       | 260   | 271 | Iodination           | Y8:Iodination:1000.00                                    | PEAKS PTM |
| R.VLLEEN(-17.03)AGGEQEER.G                       | N    | 65.50  | 1554.7162 | 14     | 1.2  | 778.3663  | 2 | 27.73 | 5        | F5:1335 | OB5955 H1 Ro.raw | 0                   | 0        | 0                       | 329   | 342 | Ammonia-loss (N)     | N6:Ammonia-loss (N):1000.00                              | PEAKS PTM |
| K.Q(-17.03)AKDLAFPGSGEQVEK.L                     | N    | 65.43  | 1685.8260 | 16     | 0.1  | 843.9204  | 2 | 29.98 | 6        | F6:1503 | OB5956 H1 Ro.raw | 1.0547E5            | 3        | 3                       | 552   | 567 | Pyro-glu from Q      | Q1:Pyro-glu from Q:1000.00                               | PEAKS PTM |

total 287 peptides



| Peptide                                                   | Uniq | -10lgP | Mass      | Length | ppm  | m/z       | z | RT    | Fraction | Scan    | Source File      | Area roasted peanut | #Feature | #Feature roasted peanut | Start | End | PTM                                 | AScore                                                                          | Found By  |
|-----------------------------------------------------------|------|--------|-----------|--------|------|-----------|---|-------|----------|---------|------------------|---------------------|----------|-------------------------|-------|-----|-------------------------------------|---------------------------------------------------------------------------------|-----------|
| K.NPQLQDLDM(+15.99)M(+15.99)LTC(+57.02)VEIKEGALMLPHFNSK.A | N    | 64.96  | 3403.6284 | 29     | -3.9 | 1135.5457 | 3 | 35.83 | 6        | F6:1849 | OB5956 H1 Ro.raw | 8.47E6              | 5        | 5                       | 415   | 443 | Oxidation (M); Carbamidomethylation | M9:Oxidation (M):54.18;M10:Oxidation (M):63.99;C13:Carbamidomethylation:1000.00 | PEAKS DB  |
| R.VLLEENAGGEQEER(+14.02).G                                | N    | 64.84  | 1585.7583 | 14     | 0.7  | 793.8870  | 2 | 27.86 | 4        | F4:1339 | OB5954 H1 Ro.raw | 1.7453E5            | 3        | 3                       | 329   | 342 | Methylation(KR)                     | R14:Methylation(KR):1000.00                                                     | PEAKS PTM |
| I.FLAGDKDNVIDQIEK.Q                                       | N    | 64.23  | 1703.8729 | 15     | -5.7 | 852.9388  | 2 | 32.22 | 6        | F6:1635 | OB5956 H1 Ro.raw | 3.2256E5            | 3        | 3                       | 537   | 551 |                                     |                                                                                 | PEAKS DB  |
| L.AGDKDNVIDQIEK.Q                                         | N    | 63.80  | 1443.7205 | 13     | -1.1 | 722.8667  | 2 | 32.43 | 4        | F4:1623 | OB5954 H1 Ro.raw | 3.3427E5            | 1        | 1                       | 539   | 551 |                                     |                                                                                 | PEAKS DB  |
| K.HADADNLIQGGQ(+.98)ATVTVANGNNRK.S                        | N    | 63.07  | 2747.3950 | 26     | 0.8  | 916.8063  | 3 | 31.39 | 4        | F4:1560 | OB5954 H1 Ro.raw | 0                   | 0        | 0                       | 223   | 248 |                                     | Q14:Deamidation (N Q):0.00                                                      | PEAKS DB  |
| K.AM(+15.99)VIVVVNK.G                                     | N    | 63.02  | 987.5787  | 9      | 1.1  | 494.7972  | 2 | 27.11 | 4        | F4:1283 | OB5954 H1 Ro.raw | 1.9071E6            | 3        | 3                       | 444   | 452 | Oxidation (M)                       | M2:Oxidation (M):1000.00                                                        | PEAKS DB  |
| K.DLAF(+15.99)GSGEQVEK.L                                  | N    | 62.87  | 1391.6569 | 13     | 0.4  | 696.8360  | 2 | 29.40 | 5        | F5:1432 | OB5955 H1 Ro.raw | 8.022E5             | 3        | 3                       | 555   | 567 | Hydroxylation Pro                   | P5:Hydroxylation Pro:1000.00                                                    | PEAKS DB  |
| K.AM(+15.99)VIVVVNKGTLNLELVAVRK.E                         | N    | 62.80  | 2225.2930 | 21     | -4.1 | 742.7686  | 3 | 32.36 | 6        | F6:1577 | OB5956 H1 Ro.raw | 1.1837E6            | 2        | 2                       | 444   | 464 | Oxidation (M)                       | M2:Oxidation (M):1000.00                                                        | PEAKS DB  |
| K.NPQLQDLDMMLTC(+57.02)VEIKEGALM(+15.99)LPHFNSK.A         | N    | 62.74  | 3387.6335 | 29     | -1.0 | 1130.2173 | 3 | 37.10 | 5        | F5:1900 | OB5955 H1 Ro.raw | 9.055E7             | 6        | 6                       | 415   | 443 | Carbamidomethylation; Oxidation (M) | C13:Carbamidomethylation:1000.00; M22:Oxidation (M):82.05                       | PEAKS DB  |
| R.SSDNEGIVK.V                                             | N    | 62.02  | 1046.5244 | 10     | 0.4  | 524.2697  | 2 | 23.40 | 5        | F5:1065 | OB5955 H1 Ro.raw | 3.7744E5            | 3        | 3                       | 351   | 360 |                                     |                                                                                 | PEAKS DB  |
| K.QAKDLAFPGSGEQVEK.L                                      | N    | 61.87  | 1702.8525 | 16     | 1.2  | 568.6255  | 3 | 27.08 | 6        | F6:1321 | OB5956 H1 Ro.raw | 2.8725E5            | 6        | 6                       | 552   | 567 |                                     |                                                                                 | PEAKS DB  |
| K.SFNLD(-18.01)EGHALR.I                                   | N    | 61.63  | 1239.5996 | 11     | 2.9  | 620.8089  | 2 | 28.79 | 4        | F4:1400 | OB5954 H1 Ro.raw | 0                   | 0        | 0                       | 249   | 259 |                                     | D5:Dehydration:49.79                                                            | PEAKS PTM |
| K.SFNLD(EGHALR(+31.99)IPSGFISYILNR.H                      | N    | 60.54  | 2650.3503 | 23     | 0.1  | 884.4575  | 3 | 39.14 | 5        | F5:2021 | OB5955 H1 Ro.raw | 5.6521E5            | 1        | 1                       | 249   | 271 |                                     | R11:Dehydration:46.57                                                           | PEAKS PTM |
| Q.SSYLQGFSR.N                                             | N    | 60.35  | 1043.5035 | 9      | 0.6  | 522.7593  | 2 | 29.24 | 6        | F6:1453 | OB5956 H1 Ro.raw | 6.7195E4            | 3        | 3                       | 304   | 312 |                                     |                                                                                 | PEAKS DB  |

total 287 peptides

| Peptide                                                    | Uniq | -10lgP | Mass      | Length | ppm  | m/z       | z | RT    | Fraction | Scan    | Source File      | Area roasted peanut | #Feature | #Feature roasted peanut | Start | End | PTM                                                                                    | AScore                                                                                                      | Found By  |
|------------------------------------------------------------|------|--------|-----------|--------|------|-----------|---|-------|----------|---------|------------------|---------------------|----------|-------------------------|-------|-----|----------------------------------------------------------------------------------------|-------------------------------------------------------------------------------------------------------------|-----------|
| K.NPQLQDLDM(+15.99)LTC(+57.02)VEIKEGALM(+15.99)LPHFNSK.A   | N    | 60.02  | 3403.6284 | 29     | -8.2 | 1135.5408 | 3 | 36.74 | 5        | F5:1878 | OB5955 H1 Ro.raw | 6.6522E6            | 6        | 6                       | 415   | 443 | Carbamidomethylation; Oxidation (M)                                                    | M10:Oxidation (M):21.94;C13:Carbamidomethylation:1000.00; M22:Oxidation (M):61.26                           | PEAKS DB  |
| K.QFQNLQNHR.I                                              | N    | 59.95  | 1183.5846 | 9      | 0.0  | 592.7996  | 2 | 23.81 | 5        | F5:1102 | OB5955 H1 Ro.raw | 1.3905E5            | 5        | 5                       | 199   | 207 |                                                                                        |                                                                                                             | PEAKS DB  |
| K.Q(-17.03)FQNLQNHR.I                                      | N    | 59.90  | 1166.5581 | 9      | 3.5  | 584.2884  | 2 | 28.04 | 4        | F4:1346 | OB5954 H1 Ro.raw | 5.0983E6            | 3        | 3                       | 199   | 207 | Pyro-glu from Q                                                                        | Q1:Pyr o-glu from Q:1000.00                                                                                 | PEAKS PTM |
| R.I(+41.03)P(+15.99)SGFISYILNR.H                           | N    | 59.87  | 1435.7823 | 12     | -3.6 | 718.8959  | 2 | 36.92 | 6        | F6:1901 | OB5956 H1 Ro.raw | 1.7838E7            | 3        | 3                       | 260   | 271 | Amidination of lysines or N-terminal amines with methyl acetimidate; Hydroxylation Pro | I1:Amidination of lysines or N-terminal amines with methyl acetimidate:1000.00;P2:Hydroxylation Pro:1000.00 | PEAKS PTM |
| K.KNPQLQDLDM(+15.99)MLTC(+57.02)VEIKEGALM(+15.99)LPHFNSK.A | N    | 59.67  | 3531.7234 | 30     | -1.9 | 883.9364  | 4 | 35.86 | 4        | F4:1821 | OB5954 H1 Ro.raw | 2.0004E6            | 3        | 3                       | 414   | 443 | Carbamidomethylation; Oxidation (M)                                                    | M10:Oxidation (M):17.01;C14:Carbamidomethylation:1000.00; M23:Oxidation (M):101.58                          | PEAKS DB  |
| K.NPQLQ(+.98)DLDMMLTC(+57.02)VEIK.E                        | N    | 59.63  | 2047.9629 | 17     | 1.5  | 1024.9902 | 2 | 44.46 | 6        | F6:2348 | OB5956 H1 Ro.raw | 0                   | 0        | 0                       | 415   | 431 | Carbamidomethylation                                                                   | Q5:Deamidation (NQ):19.68; C13:Carbamidomethylation:1000.00                                                 | PEAKS DB  |
| R.IPSGFISYILN(+.98)RHDNQNLR.V                              | N    | 59.62  | 2257.1604 | 19     | 4.7  | 753.3976  | 3 | 34.29 | 5        | F5:1740 | OB5955 H1 Ro.raw | 6.672E5             | 1        | 1                       | 260   | 278 |                                                                                        | N11:Deamidation (NQ):36.24                                                                                  | PEAKS DB  |
| K.EGALMLPH(+14.02)FNSK.A                                   | N    | 59.24  | 1356.6860 | 12     | -3.0 | 679.3483  | 2 | 30.80 | 5        | F5:1531 | OB5955 H1 Ro.raw | 3.037E5             | 3        | 3                       | 432   | 443 | Methylation(others)                                                                    | H8:Methylation (others):65.81                                                                               | PEAKS PTM |

total 287 peptides

| Peptide                                       | Uniq | -10lgP | Mass      | Length | ppm  | m/z       | z | RT    | Fraction | Scan    | Source File      | Area roasted peanut | #Feature | #Feature roasted peanut | Start | End | PTM                                                                                | AScore                                                                                                                                                      | Found By  |
|-----------------------------------------------|------|--------|-----------|--------|------|-----------|---|-------|----------|---------|------------------|---------------------|----------|-------------------------|-------|-----|------------------------------------------------------------------------------------|-------------------------------------------------------------------------------------------------------------------------------------------------------------|-----------|
| A.FPGSGEQVEK.L                                | N    | 58.82  | 1076.5138 | 10     | -3.4 | 539.2623  | 2 | 30.34 | 6        | F6:1519 | OB5956 H1 Ro.raw | 4.3607E5            | 3        | 3                       | 558   | 567 |                                                                                    |                                                                                                                                                             | PEAKS DB  |
| K.ISM(-48.00)PVNTPGQFEDFFPASSR.D              | N    | 58.66  | 2178.0381 | 20     | 2.8  | 727.0220  | 3 | 32.48 | 6        | F6:1652 | OB5956 H1 Ro.raw | 6.4552E6            | 4        | 4                       | 282   | 301 | Dethiomethyl                                                                       | M3:Det<br>hiomet<br>hyl:100<br>0.00                                                                                                                         | PEAKS PTM |
| R.I(+27.99)PSGFISYILNR.H                      | N    | 58.63  | 1406.7557 | 12     | 0.7  | 704.3856  | 2 | 42.27 | 5        | F5:2199 | OB5955 H1 Ro.raw | 0                   | 0        | 0                       | 260   | 271 | Formylation                                                                        | I1:For<br>mylatio<br>n:1000.<br>00                                                                                                                          | PEAKS PTM |
| R.LFEVKPDKKNPQLQDLMM(+15.99)LTC(+57.02)VEIK.E | N    | 58.02  | 3147.6018 | 26     | 2.2  | 787.9095  | 4 | 33.24 | 5        | F5:1670 | OB5955 H1 Ro.raw | 2.286E6             | 2        | 2                       | 406   | 431 | Carbamidomethylation                                                               | M19:Ox<br>idation<br>(M):40.<br>00;C2<br>2:Carb<br>amido<br>methyl<br>ation:1<br>000.00                                                                     | PEAKS DB  |
| R.EGEQEWGTPGS(+42.01)EVR.E                    | Y    | 57.75  | 1601.6958 | 14     | 7.6  | 801.8613  | 2 | 27.46 | 6        | F6:1334 | OB5956 H1 Ro.raw | 1.0047E5            | 3        | 3                       | 147   | 160 |                                                                                    | S11:Ac<br>etylatio<br>n (TSC<br>YH):32.<br>97                                                                                                               | PEAKS PTM |
| K.SFN(+15.99)LDEGHALR.I                       | N    | 57.68  | 1273.6051 | 11     | 0.9  | 637.8104  | 2 | 27.50 | 4        | F4:1324 | OB5954 H1 Ro.raw | 9.739E5             | 3        | 3                       | 249   | 259 | Oxidation or Hydroxylation                                                         | N3:Oxi<br>dation<br>or Hydr<br>oxylatio<br>n:55.92                                                                                                          | PEAKS PTM |
| F.NLDEGHALR.I                                 | N    | 57.57  | 1023.5097 | 9      | 0.6  | 512.7625  | 2 | 27.93 | 5        | F5:1349 | OB5955 H1 Ro.raw | 2.6681E6            | 3        | 3                       | 251   | 259 |                                                                                    |                                                                                                                                                             | PEAKS DB  |
| K.A(+41.03)M(+15.99)VIVVVNKG TGNLELVAVR.K     | N    | 57.55  | 2138.2246 | 20     | -5.4 | 1070.1138 | 2 | 34.47 | 5        | F5:1739 | OB5955 H1 Ro.raw | 4.5183E6            | 3        | 3                       | 444   | 463 | Amidination of lysines or N-terminal amines with methyl acetimidate; Oxidation (M) | A1:Ami<br>dinatio<br>n of lysi<br>nes or<br>N-termi<br>nal ami<br>nes wit<br>h methyl<br>aceti<br>midate:<br>207.56;<br>M2:Oxi<br>dation<br>(M):10<br>00.00 | PEAKS PTM |
| K.NPQLQDLDMMLTC(+71.04)VEIK.E                 | N    | 57.51  | 2060.9944 | 17     | 3.0  | 1031.5076 | 2 | 37.24 | 5        | F5:1915 | OB5955 H1 Ro.raw | 1.057E5             | 2        | 2                       | 415   | 431 | Propionamide                                                                       | C13:Pr<br>opiona<br>mide:1<br>000.00                                                                                                                        | PEAKS PTM |
| A.GDKDNVIDQIEK.Q                              | N    | 57.39  | 1372.6833 | 12     | -1.5 | 687.3479  | 2 | 32.35 | 4        | F4:1613 | OB5954 H1 Ro.raw | 1.1865E6            | 3        | 3                       | 540   | 551 |                                                                                    |                                                                                                                                                             | PEAKS DB  |
| R.K(+43.01)(+14.02)SFNLDEGHALR.I              | N    | 55.95  | 1442.7266 | 12     | 0.0  | 722.3705  | 2 | 26.25 | 5        | F5:1250 | OB5955 H1 Ro.raw | 4.2824E5            | 6        | 6                       | 248   | 259 | Carbamylation; Methylation(KR)                                                     | K1:Car<br>bamyla<br>tion:10<br>00.00;<br>K1:Met<br>hylation<br>(KR):1<br>56.90                                                                              | PEAKS PTM |
| R.IPSGFISYILNRHDN(+.98)QNL.R.V                | N    | 55.73  | 2257.1604 | 19     | -0.7 | 753.3936  | 3 | 34.26 | 4        | F4:1732 | OB5954 H1 Ro.raw | 0                   | 0        | 0                       | 260   | 278 |                                                                                    | N15:De<br>amidati<br>on (N<br>Q):0.00                                                                                                                       | PEAKS DB  |

total 287 peptides

| Peptide                                           | Uniq | -10lgP | Mass      | Length | ppm  | m/z       | z | RT    | Fraction | Scan    | Source File      | Area roasted peanut | #Feature | #Feature roasted peanut | Start | End | PTM                                     | AScore                                                                             | Found By  |
|---------------------------------------------------|------|--------|-----------|--------|------|-----------|---|-------|----------|---------|------------------|---------------------|----------|-------------------------|-------|-----|-----------------------------------------|------------------------------------------------------------------------------------|-----------|
| K.ISMPVN(+.98)TPGQFEDFFPASSR.D                    | N    | 54.95  | 2227.0254 | 20     | 6.6  | 1114.5273 | 2 | 36.77 | 4        | F4:1885 | OB5954 H1 Ro.raw | 1.011E5             | 2        | 2                       | 282   | 301 |                                         | N6:Deamidation (NQ): 42.68                                                         | PEAKS DB  |
| R.K(+27.99)SFNLDEGHALR.I                          | N    | 54.77  | 1413.7001 | 12     | 1.4  | 707.8583  | 2 | 28.46 | 5        | F5:1387 | OB5955 H1 Ro.raw | 5.5831E4            | 2        | 2                       | 248   | 259 | Formylation                             | K1:Formylation:1000.00                                                             | PEAKS PTM |
| R.LFEVKPDKK.N                                     | N    | 54.58  | 1102.6385 | 9      | 1.1  | 552.3271  | 2 | 24.84 | 4        | F4:1157 | OB5954 H1 Ro.raw | 1.1453E6            | 6        | 6                       | 406   | 414 |                                         |                                                                                    | PEAKS DB  |
| K.NPQLQDLDMMLTC(+57.02)VEIKEGALMLP(+15.99)HFNSK.A | N    | 54.18  | 3387.6335 | 29     | -0.6 | 1130.2178 | 3 | 37.70 | 4        | F4:2016 | OB5954 H1 Ro.raw | 4.3311E7            | 3        | 3                       | 415   | 443 | Carbamidomethylation; Hydroxylation Pro | C13:Carbamidomethylation:1000.00; P24:Hydroxylation Pro:122.99                     | PEAKS DB  |
| R.EGEQEWGTP(+15.99)GSEVREETSR.N                   | Y    | 54.09  | 2177.9460 | 19     | 2.3  | 1089.9828 | 2 | 26.43 | 5        | F5:1263 | OB5955 H1 Ro.raw | 1.3271E7            | 6        | 6                       | 147   | 165 | Hydroxylation Pro                       | P9:Hydroxylation Pro:1000.00                                                       | PEAKS DB  |
| R.IFLAGDKDNVIDQIEK(+42.01)Q(+.98)AK(+14.02).D     | N    | 53.39  | 2201.1580 | 19     | 2.9  | 734.7288  | 3 | 32.42 | 5        | F5:1627 | OB5955 H1 Ro.raw | 4.6872E5            | 1        | 1                       | 536   | 554 |                                         | K16:Acetylation (K): 4.05; Q17:Deamidation (NQ): 20.26; K19:Methylation (KR): 4.05 | PEAKS PTM |
| E.PDLSNNFGR.L                                     | N    | 53.18  | 1018.4832 | 9      | 0.9  | 510.2493  | 2 | 31.57 | 6        | F6:1584 | OB5956 H1 Ro.raw | 1.3909E6            | 4        | 4                       | 397   | 405 |                                         |                                                                                    | PEAKS DB  |
| K.NPQLQDLDM(+15.99)LTCVEIK(+14.02).E              | N    | 53.12  | 2019.9679 | 17     | 1.7  | 1010.9930 | 2 | 35.46 | 5        | F5:1802 | OB5955 H1 Ro.raw | 4.2793E5            | 1        | 1                       | 415   | 431 | Methylation(KR)                         | M10:Oxidation (M):8.14; K17:Methylation (KR):1000.00                               | PEAKS PTM |
| R.IFLAGDKDNVIDQ(+.98)IEKQAK.D                     | N    | 53.10  | 2145.1316 | 19     | 1.4  | 716.0521  | 3 | 33.04 | 6        | F6:1686 | OB5956 H1 Ro.raw | 1.2146E5            | 1        | 1                       | 536   | 554 |                                         | Q13:Deamidation (NQ):25.18                                                         | PEAKS DB  |
| K.SFNLDEGHALRIP(+15.99)SGFISYILNR.H               | N    | 53.04  | 2634.3552 | 23     | -3.9 | 879.1223  | 3 | 38.76 | 6        | F6:2023 | OB5956 H1 Ro.raw | 1.5218E6            | 3        | 3                       | 249   | 271 | Hydroxylation Pro                       | P13:Hydroxylation Pro:1000.00                                                      | PEAKS DB  |
| R.VAKIS(+77.99)MPVNTPGQFEDFFPASSR.D               | N    | 52.77  | 2602.2290 | 23     | 2.9  | 1302.1256 | 2 | 38.06 | 5        | F5:1958 | OB5955 H1 Ro.raw | 0                   | 0        | 0                       | 279   | 301 | Methylphosphorylation                   | S5:Methylphosphorylation:56.99                                                     | PEAKS PTM |
| R.EQEWEEEEEEEEGSNREVR.R.Y                         | N    | 52.77  | 2821.1545 | 22     | 1.7  | 941.3937  | 3 | 26.62 | 5        | F5:1273 | OB5955 H1 Ro.raw | 8.8078E5            | 3        | 3                       | 473   | 494 |                                         |                                                                                    | PEAKS DB  |

total 287 peptides

| Peptide                                                           | Uniq | -10lgP | Mass      | Length | ppm  | m/z       | z | RT    | Fraction | Scan    | Source File            | Area roasted peanut | #Feature | #Feature roasted peanut | Start | End | PTM                                 | AScore                                                                                                               | Found By  |
|-------------------------------------------------------------------|------|--------|-----------|--------|------|-----------|---|-------|----------|---------|------------------------|---------------------|----------|-------------------------|-------|-----|-------------------------------------|----------------------------------------------------------------------------------------------------------------------|-----------|
| K.QFQNLQN(+.98)HR.I                                               | N    | 52.53  | 1184.5686 | 9      | 5.4  | 593.2948  | 2 | 23.60 | 6        | F6:1114 | OB5956<br>H1<br>Ro.raw | 8.0383E2            | 1        | 1                       | 199   | 207 |                                     | N7:Deamidation (NQ): 0.00                                                                                            | PEAKS DB  |
| N.PFYFPSRR.F                                                      | N    | 52.44  | 1068.5504 | 8      | -0.1 | 535.2824  | 2 | 28.89 | 6        | F6:1431 | OB5956<br>H1<br>Ro.raw | 4.3491E6            | 4        | 4                       | 168   | 175 |                                     |                                                                                                                      | PEAKS DB  |
| K.NPQLQDLDM(+15.99)M(+15.99)LTC(+57.02)VEIKEGALM(+15.99)LPHFNSK.A | N    | 52.35  | 3419.6233 | 29     | -0.9 | 855.9124  | 4 | 34.83 | 5        | F5:1766 | OB5955<br>H1<br>Ro.raw | 1.7196E6            | 3        | 3                       | 415   | 443 | Oxidation (M); Carbamidomethylation | M9:Oxidation (M):10 00.00; M10:Oxidation (M):10 00.00; C13:Carbamidomethylation:1 000.00; M22:Oxidation (M):10 00.00 | PEAKS DB  |
| R.VAK(+27.99)ISMPVNTPGQFEDFFPASSR.D                               | N    | 52.16  | 2552.2368 | 23     | -0.3 | 1277.1252 | 2 | 36.45 | 6        | F6:1882 | OB5956<br>H1<br>Ro.raw | 0                   | 0        | 0                       | 279   | 301 |                                     | K3:Formylation:9.40                                                                                                  | PEAKS PTM |
| K.ISMPVNTPGQFEDFFPASSRDQSSYLQGFSR.N                               | N    | 52.15  | 3494.6201 | 31     | -0.9 | 1165.8796 | 3 | 36.01 | 6        | F6:1851 | OB5956<br>H1<br>Ro.raw | 4.0537E6            | 2        | 2                       | 282   | 312 |                                     |                                                                                                                      | PEAKS DB  |
| R.V(+27.99)AKISMPVNTPGQFEDFFPASSR.D                               | N    | 51.59  | 2552.2368 | 23     | -0.5 | 1277.1250 | 2 | 36.43 | 4        | F4:1865 | OB5954<br>H1<br>Ro.raw | 7.7611E5            | 1        | 1                       | 279   | 301 |                                     | V1:Formylation:0.00                                                                                                  | PEAKS PTM |
| R.WGPAEPR.E                                                       | Y    | 51.54  | 811.3976  | 7      | 1.8  | 406.7068  | 2 | 25.60 | 4        | F4:1224 | OB5954<br>H1<br>Ro.raw | 1.6393E6            | 3        | 3                       | 109   | 115 |                                     |                                                                                                                      | PEAKS DB  |
| K.SFNLDEGHALR(+31.99).I                                           | N    | 50.82  | 1289.6000 | 11     | -1.4 | 645.8063  | 2 | 30.41 | 6        | F6:1520 | OB5956<br>H1<br>Ro.raw | 0                   | 0        | 0                       | 249   | 259 | Dihydroxy                           | R11:Dihydroxy:122.75                                                                                                 | PEAKS PTM |
| R.IFLAGD(+15.99)KDNVIDQIEK.Q                                      | N    | 50.66  | 1832.9519 | 16     | -1.9 | 917.4814  | 2 | 31.99 | 4        | F4:1600 | OB5954<br>H1<br>Ro.raw | 1.5111E6            | 3        | 3                       | 536   | 551 |                                     | D6:Oxidation or Hydroxylation:12.60                                                                                  | PEAKS PTM |
| R.VLLEE(+53.92)NAGGEQEER.G                                        | N    | 50.61  | 1625.6620 | 14     | -1.0 | 542.8940  | 3 | 26.76 | 5        | F5:1278 | OB5955<br>H1<br>Ro.raw | 0                   | 0        | 0                       | 329   | 342 |                                     | E5:Replacement of 2 protons by iron: 20.92                                                                           | PEAKS PTM |
| P.SGFISYILNR.H                                                    | N    | 50.48  | 1168.6240 | 10     | 1.5  | 585.3202  | 2 | 35.08 | 6        | F6:1803 | OB5956<br>H1<br>Ro.raw | 3.0349E5            | 1        | 1                       | 262   | 271 |                                     |                                                                                                                      | PEAKS DB  |
| R.IFLAGDKDNVIDQIEK(+14.02)Q(+.98)AK(+42.01).D                     | N    | 50.18  | 2201.1580 | 19     | 5.4  | 734.7306  | 3 | 32.48 | 6        | F6:1657 | OB5956<br>H1<br>Ro.raw | 3.9073E5            | 1        | 1                       | 536   | 554 | Deamidation (NQ)                    | K16:Methylation(KR): 7.64; Q17:Deamidation (NQ): 58.99; K19:Acetylation (K): 7.64                                    | PEAKS PTM |

total 287 peptides

| Peptide                                                 | Uniq | -10lgP | Mass      | Length | ppm  | m/z       | z | RT    | Fraction | Scan    | Source File            | Area roasted peanut | #Feature | #Feature roasted peanut | Start | End | PTM                                   | AScore                                                                                      | Found By     |
|---------------------------------------------------------|------|--------|-----------|--------|------|-----------|---|-------|----------|---------|------------------------|---------------------|----------|-------------------------|-------|-----|---------------------------------------|---------------------------------------------------------------------------------------------|--------------|
| K.S(+43.01)(+14.02)FNLDEGHALR.I                         | N    | 50.01  | 1314.6316 | 11     | -0.5 | 658.3228  | 2 | 28.11 | 5        | F5:1359 | OB5955<br>H1<br>Ro.raw | 1.9424E6            | 1        | 1                       | 249   | 259 | Carbamylation;<br>Methylation(others) | S1:Carbamylation:1000.00;<br>S1:Methylation(others):88.98                                   | PEAKS<br>PTM |
| N.LDEGHALR.I                                            | N    | 49.91  | 909.4668  | 8      | 0.0  | 455.7407  | 2 | 27.93 | 5        | F5:1350 | OB5955<br>H1<br>Ro.raw | 1.94E5              | 3        | 3                       | 252   | 259 |                                       |                                                                                             | PEAKS<br>DB  |
| K.SFNLDEGH(+15.99)ALR(+31.99)IPSGFISYILNR.H             | N    | 49.58  | 2666.3452 | 23     | 1.2  | 889.7900  | 3 | 39.33 | 6        | F6:2062 | OB5956<br>H1<br>Ro.raw | 3.3065E5            | 2        | 2                       | 249   | 271 | Oxidation (HW)                        | H8:Oxidation (HW):1000.00;<br>R11:Dehydroxy:45.01                                           | PEAKS<br>PTM |
| K.SFNLDEGH(+15.99)ALRIPSGFISYILNR.H                     | N    | 49.38  | 2634.3555 | 23     | 2.3  | 1318.1880 | 2 | 38.82 | 5        | F5:2002 | OB5955<br>H1<br>Ro.raw | 9.0457E5            | 1        | 1                       | 249   | 271 | Oxidation (HW)                        | H8:Oxidation (HW):1000.00                                                                   | PEAKS<br>PTM |
| R.ESHFVSARPSQSP(+15.99)SSPEKEDQEEEN.Q                   | N    | 49.34  | 2973.2859 | 26     | 1.6  | 992.1041  | 3 | 24.81 | 6        | F6:1186 | OB5956<br>H1<br>Ro.raw | 3.8098E5            | 2        | 2                       | 574   | 599 |                                       | P14:Hydroxylation Pro:11.12                                                                 | PEAKS<br>DB  |
| R.VLLE(+21.98)ENAGGEQEER.G                              | N    | 48.97  | 1593.7246 | 14     | -0.5 | 797.8692  | 2 | 26.81 | 5        | F5:1275 | OB5955<br>H1<br>Ro.raw | 4.3339E5            | 3        | 3                       | 329   | 342 |                                       | E4:Sodium adduct:40.00                                                                      | PEAKS<br>PTM |
| R.LFEVKPKDK.K                                           | N    | 48.69  | 974.5436  | 8      | 1.7  | 488.2799  | 2 | 25.30 | 5        | F5:1183 | OB5955<br>H1<br>Ro.raw | 1.7748E6            | 6        | 6                       | 406   | 413 |                                       |                                                                                             | PEAKS<br>DB  |
| K.NPQLQDLDMM(+15.99)LTC(+57.02)VEIKEGALMLPHFN(+.98)SK.A | N    | 48.63  | 3388.6174 | 29     | 6.2  | 848.1669  | 4 | 36.39 | 6        | F6:1880 | OB5956<br>H1<br>Ro.raw | 2.0276E6            | 1        | 1                       | 415   | 443 | Carbamidomethylation                  | M10:Oxidation (M):27.96;<br>C13:Carbamidomethylation:1000.00;<br>N27:Deamidation (NQ):18.27 | PEAKS<br>DB  |
| R.SKQFQNLQNHRI                                          | Y    | 48.58  | 1398.7117 | 11     | -0.5 | 467.2443  | 3 | 24.46 | 4        | F4:1146 | OB5954<br>H1<br>Ro.raw | 1.2409E5            | 3        | 3                       | 197   | 207 |                                       |                                                                                             | PEAKS<br>DB  |
| R.IVQIEARPN.T                                           | Y    | 48.42  | 1038.5822 | 9      | 0.7  | 520.2987  | 2 | 25.99 | 4        | F4:1238 | OB5954<br>H1<br>Ro.raw | 4.8023E4            | 3        | 3                       | 208   | 216 |                                       |                                                                                             | PEAKS<br>DB  |
| R.N(+27.99)TLEAAFNAAFNEIRR.V                            | N    | 48.34  | 1921.9282 | 16     | -1.7 | 961.9697  | 2 | 37.51 | 4        | F4:1908 | OB5954<br>H1<br>Ro.raw | 4.2206E4            | 1        | 1                       | 313   | 328 | Formylation                           | N1:Formylation:1000.00                                                                      | PEAKS<br>PTM |
| R.NT(-18.01)LEAAFNAAFNEIRR.V                            | N    | 48.27  | 1875.9227 | 16     | -1.8 | 626.3137  | 3 | 34.20 | 4        | F4:1731 | OB5954<br>H1<br>Ro.raw | 1.108E7             | 3        | 3                       | 313   | 328 | Dehydration                           | T2:Dehydration:1000.00                                                                      | PEAKS<br>PTM |

total 287 peptides

| Peptide                                                         | Uniq | -10lgP | Mass      | Length | ppm  | m/z       | z | RT    | Fraction | Scan    | Source File      | Area roasted peanut | #Feature | #Feature roasted peanut | Start | End | PTM                                | AScore                                                                                                    | Found By  |
|-----------------------------------------------------------------|------|--------|-----------|--------|------|-----------|---|-------|----------|---------|------------------|---------------------|----------|-------------------------|-------|-----|------------------------------------|-----------------------------------------------------------------------------------------------------------|-----------|
| R.LFEVKPDKKPNQLQDLDM(+15.99)MLTC(+57.02)VEIK.E                  | N    | 48.12  | 3147.6018 | 26     | -1.9 | 787.9062  | 4 | 34.20 | 4        | F4:1734 | OB5954 H1 Ro.raw | 2.5552E6            | 4        | 4                       | 406   | 431 | Carbamidomethylation               | M18:Oxidation (M):33.98;C2 2:Carbamidomethylation:1000.00                                                 | PEAKS DB  |
| K.KNPQLQDLDM(+15.99)LTC(+57.02)VEIKEGALM(+15.99)LPHFNSK.A       | N    | 47.73  | 3531.7234 | 30     | -1.1 | 883.9372  | 4 | 35.80 | 5        | F5:1822 | OB5955 H1 Ro.raw | 0                   | 0        | 0                       | 414   | 443 | Carbamidomethylation               | M11:Oxidation (M):0.00;C14:Carbamidomethylation:1000.00;M2 3:Oxidation (M):45.87                          | PEAKS DB  |
| R.DQSSY(-18.01)LQGFSR.N                                         | N    | 47.62  | 1268.5785 | 11     | -0.6 | 635.2961  | 2 | 30.85 | 6        | F6:1579 | OB5956 H1 Ro.raw | 2.6456E5            | 1        | 1                       | 302   | 312 |                                    | Y5:Dehydration:0.00                                                                                       | PEAKS PTM |
| K.KGSEEDIT(-18.01)N(+.98)PINLR.D                                | N    | 47.57  | 1696.8268 | 15     | 2.3  | 566.6175  | 3 | 29.07 | 6        | F6:1442 | OB5956 H1 Ro.raw | 3.8587E5            | 3        | 3                       | 379   | 393 | Deamidation (NQ)                   | T9:Dehydration:45.01;N10:Deamidation (NQ):59.10                                                           | PEAKS PTM |
| R.NTLEAAFNAEFN(+.98)EIR.R                                       | N    | 47.43  | 1738.8162 | 15     | 9.2  | 870.4233  | 2 | 44.36 | 5        | F5:2303 | OB5955 H1 Ro.raw | 5.1969E3            | 1        | 1                       | 313   | 327 |                                    | N12:Deamidation (NQ):0.00                                                                                 | PEAKS DB  |
| K.SFNLDEGHALRIPSGFISILNRHDNQNLR.V                               | N    | 47.02  | 3495.7759 | 30     | -2.1 | 700.1610  | 5 | 35.83 | 6        | F6:1842 | OB5956 H1 Ro.raw | 2.2604E6            | 2        | 2                       | 249   | 278 |                                    |                                                                                                           | PEAKS DB  |
| K.NPQLQ(+.98)DLDM(+15.99)MLTC(+57.02)VEIKEGALM(+15.99)LPHFNSK.A | N    | 47.00  | 3404.6125 | 29     | -0.4 | 1135.8777 | 3 | 36.69 | 5        | F5:1878 | OB5955 H1 Ro.raw | 3.8413E5            | 1        | 1                       | 415   | 443 | Carbamidomethylation               | Q5:Deamidation (NQ):45.47;M9:Oxidation (M):0.00;C13:Carbamidomethylation:1000.00;M2 2:Oxidation (M):38.75 | PEAKS DB  |
| K.D(+43.01)(+14.02)LAFPGSGEQVEK.L                               | N    | 46.93  | 1432.6833 | 13     | -0.1 | 717.3489  | 2 | 31.08 | 4        | F4:1535 | OB5954 H1 Ro.raw | 9.9373E5            | 3        | 3                       | 555   | 567 | Carbamylation; Methylation(others) | D1:Carbamylation:220.79;D 1:Methylation (others):132.53                                                   | PEAKS PTM |

total 287 peptides

| Peptide                                              | Uniq | -10lgP | Mass      | Length | ppm  | m/z      | z | RT    | Fraction | Scan    | Source File      | Area roasted peanut | #Feature | #Feature roasted peanut | Start | End | PTM                  | AScore                                                                                                                             | Found By     |
|------------------------------------------------------|------|--------|-----------|--------|------|----------|---|-------|----------|---------|------------------|---------------------|----------|-------------------------|-------|-----|----------------------|------------------------------------------------------------------------------------------------------------------------------------|--------------|
| K.SFNLDEGHALR(+14.02)IPSGFISYILN(+.98)R.H            | N    | 46.86  | 2633.3601 | 23     | -6.4 | 878.7883 | 3 | 36.34 | 5        | F5:1848 | OB5955 H1 Ro.raw | 1.8431E5            | 2        | 2                       | 249   | 271 | Deamidation (NQ)     | R11:Me<br>thylatio<br>n(KR):<br>28.64;<br>N22:De<br>amidati<br>on (N<br>Q):57.7<br>1                                               | PEAKS<br>PTM |
| F.PGSGEQVEK.L                                        | N    | 46.51  | 929.4454  | 9      | -3.7 | 465.7282 | 2 | 30.34 | 6        | F6:1524 | OB5956 H1 Ro.raw | 5.467E4             | 1        | 1                       | 559   | 567 |                      |                                                                                                                                    | PEAKS<br>DB  |
| R.ESHFVSAR PQSQSP(+15.99)SSPEKDEEEE.N                | N    | 46.47  | 2859.2429 | 25     | 2.4  | 954.0906 | 3 | 24.92 | 5        | F5:1173 | OB5955 H1 Ro.raw | 7.3448E4            | 1        | 1                       | 574   | 598 |                      | P14:Hy<br>droxyla<br>tion Pr<br>o:26.52                                                                                            | PEAKS<br>DB  |
| R.DQSSYLQGF SR(+15.99).N                             | N    | 46.23  | 1302.5840 | 11     | 2.5  | 652.3009 | 2 | 30.63 | 5        | F5:1518 | OB5955 H1 Ro.raw | 1.9563E5            | 4        | 4                       | 302   | 312 |                      | R11:Ox<br>idation<br>or Hydr<br>oxylatio<br>n:42.88                                                                                | PEAKS<br>PTM |
| L.DEGHALR.I                                          | N    | 45.97  | 796.3828  | 7      | 2.5  | 399.1996 | 2 | 27.93 | 5        | F5:1351 | OB5955 H1 Ro.raw | 9.4873E4            | 3        | 3                       | 253   | 259 |                      |                                                                                                                                    | PEAKS<br>DB  |
| R.LFEVKPDKKNPQLQ(+.98)DLDMM(+15.99)LTC(+57.02)VEIK.E | N    | 45.61  | 3148.5857 | 26     | 7.4  | 788.1595 | 4 | 33.17 | 5        | F5:1670 | OB5955 H1 Ro.raw | 4.4314E5            | 1        | 1                       | 406   | 431 | Carbamidomethylation | Q14:De<br>amidati<br>on (N<br>Q):0.0<br>0;M19:<br>Oxidati<br>on (M):<br>23.10;<br>C22:Ca<br>rbamid<br>omethyl<br>ation:1<br>000.00 | PEAKS<br>DB  |
| S.F(+43.01)NLDE(+21.98)GHALRIPSGFISYILNR.H           | N    | 45.55  | 2596.3162 | 22     | 7.8  | 866.4528 | 3 | 40.28 | 6        | F6:2103 | OB5956 H1 Ro.raw | 2.2619E6            | 3        | 3                       | 250   | 271 | Carbamylation        | F1:Car<br>bamyla<br>tion:10<br>00.00;<br>E5:Sodi<br>um addu<br>ct:0.00                                                             | PEAKS<br>PTM |
| R.IFLAGDKDNVID.Q                                     | N    | 45.24  | 1318.6769 | 12     | 0.0  | 660.3457 | 2 | 31.81 | 4        | F4:1586 | OB5954 H1 Ro.raw | 1.1587E5            | 3        | 3                       | 536   | 547 |                      |                                                                                                                                    | PEAKS<br>DB  |
| K.KNPQLQLDLM(+15.99)MLTC(+57.02)VEIKEGALMLPHFNSK.A   | N    | 45.13  | 3515.7285 | 30     | -1.9 | 879.9377 | 4 | 35.30 | 4        | F4:1798 | OB5954 H1 Ro.raw | 6.4172E5            | 1        | 1                       | 414   | 443 | Carbamidomethylation | M10:Ox<br>idation<br>(M):14.<br>02;C1<br>4:Carb<br>amido<br>methyl<br>ation:1<br>000.00                                            | PEAKS<br>DB  |
| R.NTLEAAFN AEFN(+.98)EIRR.V                          | N    | 45.08  | 1894.9172 | 16     | -4.2 | 948.4619 | 2 | 33.08 | 4        | F4:1691 | OB5954 H1 Ro.raw | 2.2628E6            | 3        | 3                       | 313   | 328 |                      | N12:De<br>amidati<br>on (N<br>Q):39.0<br>2                                                                                         | PEAKS<br>DB  |
| R.IFLAGDK(+15.99)DNVIDQIEK.Q                         | N    | 44.85  | 1832.9519 | 16     | 0.9  | 917.4841 | 2 | 31.94 | 6        | F6:1617 | OB5956 H1 Ro.raw | 3.7677E5            | 1        | 1                       | 536   | 551 |                      | K7:Oxi<br>dation<br>or Hydr<br>oxylatio<br>n:17.01                                                                                 | PEAKS<br>PTM |
| V.QIEARPNTLVLPK.H                                    | Y    | 44.77  | 1477.8616 | 13     | -1.8 | 739.9368 | 2 | 30.56 | 4        | F4:1513 | OB5954 H1 Ro.raw | 1.5072E5            | 3        | 3                       | 210   | 222 |                      |                                                                                                                                    | PEAKS<br>DB  |
| total 287 peptides                                   |      |        |           |        |      |          |   |       |          |         |                  |                     |          |                         |       |     |                      |                                                                                                                                    |              |



| Peptide                                                | Uniq | -10lgP | Mass      | Length | ppm  | m/z       | z | RT    | Fraction | Scan    | Source File      | Area roasted peanut | #Feature | #Feature roasted peanut | Start | End | PTM                                 | AScore                                                                               | Found By  |
|--------------------------------------------------------|------|--------|-----------|--------|------|-----------|---|-------|----------|---------|------------------|---------------------|----------|-------------------------|-------|-----|-------------------------------------|--------------------------------------------------------------------------------------|-----------|
| R.KSFNLDEGH(+15.99)ALR.I                               | N    | 44.62  | 1401.7001 | 12     | 3.9  | 701.8600  | 2 | 27.64 | 6        | F6:1349 | OB5956 H1 Ro.raw | 7.3368E4            | 2        | 2                       | 248   | 259 | Oxidation (HW)                      | H9:Oxidation (HW):1000.00                                                            | PEAKS PTM |
| R.N(+.98)TLEAAFNAEFNEIRR.V                             | N    | 44.42  | 1894.9172 | 16     | 3.8  | 948.4695  | 2 | 36.66 | 6        | F6:1890 | OB5956 H1 Ro.raw | 1.2834E6            | 2        | 2                       | 313   | 328 |                                     | N1:Deamidation (NQ):41.52                                                            | PEAKS DB  |
| R.ESHFVSARP(+15.99)QSQSPSSPEKEDQEEEN.Q                 | N    | 44.15  | 2973.2859 | 26     | 2.8  | 992.1053  | 3 | 24.92 | 5        | F5:1161 | OB5955 H1 Ro.raw | 1.8315E5            | 1        | 1                       | 574   | 599 |                                     | P9:Hydroxylation Pro:18.35                                                           | PEAKS DB  |
| K.AMVIVVVN(+.98)KGTGNLELVAVRK.E                        | N    | 43.52  | 2210.2820 | 21     | 1.9  | 1106.1504 | 2 | 34.35 | 5        | F5:1720 | OB5955 H1 Ro.raw | 6.7558E5            | 2        | 2                       | 444   | 464 |                                     | N8:Deamidation (NQ):28.79                                                            | PEAKS DB  |
| R.IFLAGDKDNVIDQIEK(+14.02)(+43.01).Q                   | N    | 43.38  | 1873.9785 | 16     | -1.3 | 937.9953  | 2 | 32.42 | 5        | F5:1608 | OB5955 H1 Ro.raw | 8.0571E6            | 1        | 1                       | 536   | 551 | Methylation(C-term); Carbamylation  | K16:Methylation(C-term):100.00;K16:Carbamylation:128.00                              | PEAKS PTM |
| R.D(-18.01)QSSYLQGFSSR.N                               | N    | 43.26  | 1268.5785 | 11     | 1.6  | 635.2975  | 2 | 29.92 | 6        | F6:1489 | OB5956 H1 Ro.raw | 0                   | 0        | 0                       | 302   | 312 |                                     | D1:Dehydration:0.00                                                                  | PEAKS PTM |
| R.LFEVKPDKKNPQLQDLDM(+15.99)M(+15.99)LTC(+57.02)VEIK.E | N    | 43.03  | 3163.5967 | 26     | -3.4 | 791.9037  | 4 | 32.67 | 6        | F6:1663 | OB5956 H1 Ro.raw | 2.1471E6            | 3        | 3                       | 406   | 431 | Oxidation (M); Carbamidomethylation | M18:Oxidation (M):1000.00;M19:Oxidation (M):1000.00;C22:Carbamidomethylation:1000.00 | PEAKS DB  |
| T.GNLELVAVRK.E                                         | N    | 43.00  | 1097.6556 | 10     | 0.5  | 549.8354  | 2 | 27.00 | 5        | F5:1296 | OB5955 H1 Ro.raw | 3.6527E5            | 3        | 3                       | 455   | 464 |                                     |                                                                                      | PEAKS DB  |
| K.KN(+.98)PQLQ(+.98)DLDMMLTC(+57.02)VEIKEGALMLPHFNSK.A | N    | 42.92  | 3501.7017 | 30     | 7.8  | 876.4395  | 4 | 36.93 | 6        | F6:1903 | OB5956 H1 Ro.raw | 5.6427E6            | 1        | 1                       | 414   | 443 | Carbamidomethylation                | N2:Deamidation (NQ):14.04;Q6:Deamidation (NQ):0.00;C14:Carbamidomethylation:1000.00  | PEAKS DB  |
| R.IFLAGDKDNVIDQIEK(+43.01)QAK(+14.02).D                | N    | 42.77  | 2201.1692 | 19     | 0.9  | 734.7310  | 3 | 32.71 | 4        | F4:1644 | OB5954 H1 Ro.raw | 3.8417E5            | 1        | 1                       | 536   | 554 |                                     | K16:Carbamylation:0.00;K19:Methylation (KR):0.00                                     | PEAKS PTM |

total 287 peptides

| Peptide                                           | Uniq | -10lgP | Mass      | Length | ppm  | m/z       | z | RT    | Fraction | Scan    | Source File      | Area roasted peanut | #Feature | #Feature roasted peanut | Start | End | PTM                                                                                | AScore                                                                                                  | Found By  |
|---------------------------------------------------|------|--------|-----------|--------|------|-----------|---|-------|----------|---------|------------------|---------------------|----------|-------------------------|-------|-----|------------------------------------------------------------------------------------|---------------------------------------------------------------------------------------------------------|-----------|
| K.S(+43.01)(+14.02)FNLDEGHALRIPSGFISYILNR.H       | N    | 42.43  | 2675.3818 | 23     | -1.9 | 892.7996  | 3 | 37.80 | 6        | F6:1964 | OB5956 H1 Ro.raw | 0                   | 0        | 0                       | 249   | 271 |                                                                                    | S1:Carbamylation:100.00; S1:Methylation (others):34.30                                                  | PEAKS PTM |
| K.GSEEDITNPIN(+.98)LRDGEPLSNFGR.L                 | N    | 42.34  | 2888.3059 | 26     | 6.7  | 1445.1699 | 2 | 32.90 | 4        | F4:1642 | OB5954 H1 Ro.raw | 1.8658E5            | 1        | 1                       | 380   | 405 |                                                                                    | N12:Deamidation (N Q):12.33                                                                             | PEAKS DB  |
| R.V(+43.01)LLE(+14.02)ENAGGEQEER.G                | N    | 42.24  | 1628.7642 | 14     | 1.7  | 815.3907  | 2 | 27.00 | 5        | F5:1297 | OB5955 H1 Ro.raw | 4.2233E5            | 3        | 3                       | 329   | 342 | Carbamylation                                                                      | V1:Carbamylation:100.00; E4:Methylation (others):30.46                                                  | PEAKS PTM |
| R.I(+43.01)FLAGDK(+14.02)DNVIDQIEK.Q              | N    | 42.15  | 1873.9785 | 16     | 4.9  | 938.0011  | 2 | 32.57 | 4        | F4:1632 | OB5954 H1 Ro.raw | 0                   | 0        | 0                       | 536   | 551 | Carbamylation; Methylation(KR)                                                     | I1:Carbamylation:135.80; K7:Methylation(KR):195.94                                                      | PEAKS PTM |
| K.D(+15.99)LAFPGSGEQVEK.L                         | N    | 42.08  | 1391.6569 | 13     | 0.4  | 696.8360  | 2 | 29.40 | 5        | F5:1368 | OB5955 H1 Ro.raw | 5.511E5             | 2        | 2                       | 555   | 567 | Oxidation or Hydroxylation                                                         | D1:Oxidation or Hydroxylation:77.13                                                                     | PEAKS PTM |
| K.KNPQLQLDMM(+15.99)LTC(+57.02)VEIKEGALMLPHFNSK.A | N    | 42.02  | 3515.7285 | 30     | 1.3  | 879.9406  | 4 | 35.25 | 5        | F5:1790 | OB5955 H1 Ro.raw | 0                   | 0        | 0                       | 414   | 443 | Carbamidomethylation                                                               | M11:Oxidation (M):12.28; C14:Carbamidomethylation:1000.00                                               | PEAKS DB  |
| K.A(+41.03)M(+15.99)VIVVVNKGTLNELVAVRK.E          | N    | 41.92  | 2266.3196 | 21     | 0.6  | 1134.1677 | 2 | 32.98 | 5        | F5:1660 | OB5955 H1 Ro.raw | 1.5326E7            | 6        | 6                       | 444   | 464 | Amidination of lysines or N-terminal amines with methyl acetimidate; Oxidation (M) | A1:Amidination of lysines or N-terminal amines with methyl acetimidate:131.34; M2:Oxidation (M):1000.00 | PEAKS PTM |
| K.EGALM(+15.99)LPHFN(+.98)SK.A                    | N    | 41.90  | 1359.6493 | 12     | 2.8  | 680.8338  | 2 | 31.22 | 4        | F4:1550 | OB5954 H1 Ro.raw | 0                   | 0        | 0                       | 432   | 443 | Oxidation (M); Deamidation (NQ)                                                    | M5:Oxidation (M):1000.00; N10:Deamidation (N Q):1000.00                                                 | PEAKS DB  |

total 287 peptides

| Peptide                                                   | Uniq | -10lgP | Mass      | Length | ppm  | m/z       | z | RT    | Fraction | Scan    | Source File      | Area roasted peanut | #Feature | #Feature roasted peanut | Start | End | PTM                  | AScore                                                                                      | Found By  |
|-----------------------------------------------------------|------|--------|-----------|--------|------|-----------|---|-------|----------|---------|------------------|---------------------|----------|-------------------------|-------|-----|----------------------|---------------------------------------------------------------------------------------------|-----------|
| K.NPQLQLDLM(-48.00)MLTC(+57.02)VEIK.E                     | N    | 41.66  | 1998.9755 | 17     | 6.7  | 667.3369  | 3 | 34.52 | 6        | F6:1773 | OB5956 H1 Ro.raw | 2.0007E6            | 2        | 2                       | 415   | 431 | Carbamidomethylation | M9:Deamidation:11.06;C13:Carbamidomethylation:1000.00                                       | PEAKS PTM |
| K.GTGNLELVAVRKEQQQR.G                                     | N    | 41.33  | 1925.0442 | 17     | 1.4  | 642.6896  | 3 | 26.67 | 6        | F6:1294 | OB5956 H1 Ro.raw | 2.686E4             | 1        | 1                       | 453   | 469 |                      |                                                                                             | PEAKS DB  |
| K.NPQLQLDMLMLTC(+57.02)VEIK(+43.01)EGALMLPHFNSK(+14.02).A | N    | 41.19  | 3428.6602 | 29     | -1.5 | 858.1710  | 4 | 37.84 | 6        | F6:1971 | OB5956 H1 Ro.raw | 2.9855E6            | 1        | 1                       | 415   | 443 | Carbamidomethylation | C13:Carbamidomethylation:1000.00;K17:Carbamidomethylation:11.67;K29:Met hylation (KR):11.67 | PEAKS PTM |
| R.IFLAGDKDN(+.98)VIDQIEKQ(+.98)AK.D                       | N    | 41.17  | 2146.1157 | 19     | 9.8  | 716.3862  | 3 | 32.98 | 5        | F5:1661 | OB5955 H1 Ro.raw | 1.2092E5            | 1        | 1                       | 536   | 554 |                      | N9:Deamidation (NQ):13.83;Q17:Deamidation (NQ):17.65                                        | PEAKS DB  |
| K.NPQ(+.98)LQDLMLMLTC(+57.02)VEIK.E                       | N    | 41.15  | 2047.9629 | 17     | 2.9  | 1024.9917 | 2 | 46.45 | 4        | F4:2441 | OB5954 H1 Ro.raw | 0                   | 0        | 0                       | 415   | 431 | Carbamidomethylation | Q3:Deamidation (NQ):14.04;C13:Carbamidomethylation:1000.00                                  | PEAKS DB  |
| R.EQEWEEEEEEEEGSNREVR.R                                   | N    | 41.08  | 2665.0535 | 21     | 2.4  | 889.3605  | 3 | 27.88 | 4        | F4:1353 | OB5954 H1 Ro.raw | 4.8884E4            | 1        | 1                       | 473   | 493 |                      |                                                                                             | PEAKS DB  |
| R.VLLEEN(+.98)AGGEQEERGQR.R                               | N    | 40.76  | 1913.9078 | 17     | -1.6 | 638.9755  | 3 | 25.99 | 4        | F4:1234 | OB5954 H1 Ro.raw | 0                   | 0        | 0                       | 329   | 345 |                      | N6:Deamidation (NQ):28.79                                                                   | PEAKS DB  |
| K.GT(-18.01)GNLELVAVRK.E                                  | N    | 40.55  | 1237.7142 | 12     | 2.6  | 413.5797  | 3 | 27.00 | 5        | F5:1287 | OB5955 H1 Ro.raw | 9.9167E5            | 2        | 2                       | 453   | 464 | Dehydration          | T2:Dehydration:1000.00                                                                      | PEAKS PTM |
| K.KNPQLQ(+.98)DLMLMLTC(+57.02)VEIKEGALMLPHFNSK.A          | N    | 40.26  | 3500.7175 | 30     | 3.4  | 876.1896  | 4 | 37.51 | 4        | F4:1896 | OB5954 H1 Ro.raw | 1.6398E6            | 1        | 1                       | 414   | 443 | Carbamidomethylation | Q6:Deamidation (NQ):12.19;C14:Carbamidomethylation:1000.00                                  | PEAKS DB  |
| R.EGEQEW(+15.99)GTPGSEVRETSR.N                            | Y    | 39.91  | 2177.9460 | 19     | 1.6  | 726.9905  | 3 | 26.43 | 5        | F5:1304 | OB5955 H1 Ro.raw | 1.2886E7            | 4        | 4                       | 147   | 165 | Oxidation (HW)       | W6:Oxidation (HW):1000.00                                                                   | PEAKS PTM |

total 287 peptides

| Peptide                                             | Uniq | -10lgP | Mass      | Length | ppm  | m/z       | z | RT    | Fraction | Scan    | Source File      | Area roasted peanut | #Feature | #Feature roasted peanut | Start | End | PTM             | AScore                                                                      | Found By  |
|-----------------------------------------------------|------|--------|-----------|--------|------|-----------|---|-------|----------|---------|------------------|---------------------|----------|-------------------------|-------|-----|-----------------|-----------------------------------------------------------------------------|-----------|
| R.IFLAGD(+14.02)K(+43.01)DNVIDQIEK.Q                | N    | 39.86  | 1873.9785 | 16     | 1.7  | 937.9982  | 2 | 32.48 | 6        | F6:1653 | OB5956 H1 Ro.raw | 9.6228E6            | 3        | 3                       | 536   | 551 | Carbamylation   | D6:Met hylation (other s):18.53;K7:C arbamy lation:62.41                    | PEAKS PTM |
| R.E(-18.01)GEQEWGTPGSEVREETSR.N                     | Y    | 39.24  | 2143.9407 | 19     | 2.7  | 1072.9805 | 2 | 29.74 | 5        | F5:1461 | OB5955 H1 Ro.raw | 2.5488E5            | 3        | 3                       | 147   | 165 | Pyro-glu from E | E1:Pyro -glu fro m E:1000.00                                                | PEAKS PTM |
| R.EEDWRQPR.E                                        | N    | 38.91  | 1114.5155 | 8      | 1.8  | 558.2661  | 2 | 23.91 | 4        | F4:1112 | OB5954 H1 Ro.raw | 0                   | 0        | 0                       | 120   | 127 |                 |                                                                             | PEAKS DB  |
| R.SKQFQNLQNH(+15.99)R.I                             | Y    | 38.88  | 1414.7065 | 11     | 2.4  | 708.3622  | 2 | 24.12 | 5        | F5:1124 | OB5955 H1 Ro.raw | 1.2982E3            | 1        | 1                       | 197   | 207 | Oxidation (HW)  | H10:Ox idation (HW):1000.00                                                 | PEAKS PTM |
| K.A(+43.01)MVIVVVNKG TGNLELVAVR.K                   | N    | 38.81  | 2124.2090 | 20     | 0.7  | 1063.1125 | 2 | 33.65 | 4        | F4:1688 | OB5954 H1 Ro.raw | 6.7878E5            | 3        | 3                       | 444   | 463 | Carbamylation   | A1:Car bamyla tion:161.20                                                   | PEAKS PTM |
| K.EGALM(-48.00)LPHFNSK.A                            | N    | 38.72  | 1294.6670 | 12     | 1.5  | 432.5636  | 3 | 28.65 | 5        | F5:1381 | OB5955 H1 Ro.raw | 3.9929E6            | 3        | 3                       | 432   | 443 | Dethiomethyl    | M5:Det hio met hyl:1000.00                                                  | PEAKS PTM |
| R.PNTLVLPK.H                                        | N    | 38.45  | 880.5382  | 8      | -2.9 | 441.2751  | 2 | 28.00 | 6        | F6:1374 | OB5956 H1 Ro.raw | 1.9367E5            | 2        | 2                       | 215   | 222 |                 |                                                                             | PEAKS DB  |
| K.S(+42.01)(+14.02)FNLDEGHALR.I                     | N    | 38.42  | 1313.6364 | 11     | -3.6 | 657.8231  | 2 | 28.09 | 5        | F5:1359 | OB5955 H1 Ro.raw | 1.5617E6            | 1        | 1                       | 249   | 259 |                 | S1:Acet ylation (N-ter m):1000.00;S 1:Meth ylation (other s):49.79          | PEAKS PTM |
| R.IFLAGDKDN(+.98)VIDQIEK(-.98).Q                    | N    | 38.33  | 1816.9570 | 16     | 0.5  | 606.6599  | 3 | 57.76 | 5        | F5:3342 | OB5955 H1 Ro.raw | 3.1778E5            | 3        | 3                       | 536   | 551 | Amidation       | N9:Dea midatio n (NQ): 29.57; K16:A midatio n:1000.00                       | PEAKS PTM |
| K.S(-18.01)FNLD(-18.01)EGHALR(+14.02)IPSGFISYILNR.H | N    | 37.89  | 2596.3550 | 23     | -7.1 | 866.4528  | 3 | 40.28 | 6        | F6:2110 | OB5956 H1 Ro.raw | 1.4449E6            | 1        | 1                       | 249   | 271 | Methylation(KR) | S1:Deh ydratio n:19.61;D5:D ehydrat ion:34.08;R1 1:Meth ylation (KR):157.81 | PEAKS PTM |
| K.SFNLD(+53.92)EGHALR.I                             | N    | 37.31  | 1311.5294 | 11     | 1.0  | 438.1842  | 3 | 28.04 | 4        | F4:1362 | OB5954 H1 Ro.raw | 1.3891E5            | 2        | 2                       | 249   | 259 |                 | D5:Rep laceme nt of 2 protons by iron: 18.17                                | PEAKS PTM |
| R.N(+.98)TLEAAFNAEFNEIR.R                           | N    | 36.98  | 1738.8162 | 15     | 9.2  | 870.4233  | 2 | 44.36 | 5        | F5:2311 | OB5955 H1 Ro.raw | 5.1969E3            | 1        | 1                       | 313   | 327 |                 | N1:Dea midatio n (NQ): 21.41                                                | PEAKS DB  |
| total 287 peptides                                  |      |        |           |        |      |           |   |       |          |         |                  |                     |          |                         |       |     |                 |                                                                             |           |

| Peptide                                                          | Uniq | -10lgP | Mass      | Length | ppm  | m/z       | z | RT    | Fraction | Scan    | Source File      | Area roasted peanut | #Feature | #Feature roasted peanut | Start | End | PTM                  | AScore                                                                                                       | Found By  |
|------------------------------------------------------------------|------|--------|-----------|--------|------|-----------|---|-------|----------|---------|------------------|---------------------|----------|-------------------------|-------|-----|----------------------|--------------------------------------------------------------------------------------------------------------|-----------|
| R.REQEW(+15.99)EEEEDEEEEGSNR.E                                   | N    | 36.76  | 2452.9375 | 19     | -0.5 | 818.6527  | 3 | 25.98 | 4        | F4:1239 | OB5954 H1 Ro.raw | 6.7106E4            | 2        | 2                       | 472   | 490 | Oxidation (HW)       | W5:Oxidation (HW):1000.00                                                                                    | PEAKS PTM |
| R.IFLAGDK(+27.99)DNVIDQIEK.Q                                     | N    | 36.69  | 1844.9519 | 16     | -0.6 | 923.4827  | 2 | 34.83 | 5        | F5:1775 | OB5955 H1 Ro.raw | 1.1863E5            | 1        | 1                       | 536   | 551 |                      | K7:Formylation:17.54                                                                                         | PEAKS PTM |
| K.SFNLDE(+53.92)GHALR.I                                          | N    | 36.63  | 1311.5294 | 11     | -0.2 | 438.1837  | 3 | 27.93 | 5        | F5:1353 | OB5955 H1 Ro.raw | 5.2242E4            | 1        | 1                       | 249   | 259 |                      | E6:Replacement of 2 protons by iron:16.90                                                                    | PEAKS PTM |
| R.IFLAGDKDNVID(-18.01)QIEK.Q                                     | N    | 36.38  | 1798.9464 | 16     | 0.7  | 900.4811  | 2 | 31.39 | 6        | F6:1591 | OB5956 H1 Ro.raw | 6.7841E4            | 1        | 1                       | 536   | 551 |                      | D12:Dehydration:0.00                                                                                         | PEAKS PTM |
| K.NPQLQ(+.98)DLDDMM(+15.99)LTC(+57.02)VEIKEGALM(+15.99)LPHFNSK.A | N    | 36.05  | 3404.6125 | 29     | -1.8 | 852.1589  | 4 | 38.22 | 6        | F6:1993 | OB5956 H1 Ro.raw | 8.1948E5            | 1        | 1                       | 415   | 443 | Carbamidomethylation | Q5:Deamidation (NQ):30.14; M10:Oxidation (M):0.00; C13:Carbamidomethylation:1000.00; M22:Oxidation (M):14.60 | PEAKS DB  |
| K.NPQLQDLDDMLTVCIEK(+14.02)EGALM(+15.99)LPHFNSK.A                | N    | 36.00  | 3344.6277 | 29     | -0.2 | 837.1640  | 4 | 37.84 | 6        | F6:1961 | OB5956 H1 Ro.raw | 7.3561E6            | 2        | 2                       | 415   | 443 |                      | K17:Methylation(KR):22.74; M22:Oxidation (M):20.37                                                           | PEAKS PTM |
| K.AMVIVVVNKGKGTGN(+.98)LELVAVRK.E                                | N    | 35.97  | 2210.2820 | 21     | 6.2  | 737.7725  | 3 | 40.10 | 5        | F5:2113 | OB5955 H1 Ro.raw | 2.1847E5            | 1        | 1                       | 444   | 464 |                      | N13:Deamidation (NQ):18.40                                                                                   | PEAKS DB  |
| W.GTPGSEVREETS.R                                                 | Y    | 35.79  | 1403.6641 | 13     | 3.8  | 702.8420  | 2 | 27.77 | 5        | F5:1332 | OB5955 H1 Ro.raw | 2.4946E4            | 1        | 1                       | 153   | 165 |                      |                                                                                                              | PEAKS DB  |
| K.NPQLQDLDDMLTLC(+71.04)VEIKEGALMLPHFNSK.A                       | N    | 35.62  | 3385.6543 | 29     | -1.5 | 1129.5570 | 3 | 38.07 | 4        | F4:1978 | OB5954 H1 Ro.raw | 1.5713E5            | 1        | 1                       | 415   | 443 | Propionamide         | C13:Propionamide:1000.00                                                                                     | PEAKS PTM |
| R.N(-17.03)NPYFPSRR.F                                            | N    | 35.47  | 1279.6097 | 10     | 1.1  | 427.5443  | 3 | 28.89 | 6        | F6:1434 | OB5956 H1 Ro.raw | 5.7683E5            | 3        | 3                       | 166   | 175 |                      | N1:Ammonia-loss (N):9.34                                                                                     | PEAKS PTM |
| R.NTLEAAFNAEFN(+15.99)EIRR.V                                     | N    | 35.08  | 1909.9282 | 16     | 0.9  | 955.9723  | 2 | 32.98 | 5        | F5:1662 | OB5955 H1 Ro.raw | 2.4059E6            | 2        | 2                       | 313   | 328 |                      | N12:Oxidation or Hydroxylation:9.28                                                                          | PEAKS PTM |
| R.EGEQEW(+31.99)GTPGSEVREETS.R                                   | Y    | 34.83  | 2193.9409 | 19     | 0.5  | 732.3213  | 3 | 25.57 | 6        | F6:1219 | OB5956 H1 Ro.raw | 2.9433E5            | 1        | 1                       | 147   | 165 |                      | W6:Dihydroxy:28.36                                                                                           | PEAKS PTM |

total 287 peptides

| Peptide                                                 | Uniq | -10lgP | Mass      | Length | ppm  | m/z       | z | RT    | Fraction | Scan    | Source File            | Area roasted peanut | #Feature | #Feature roasted peanut | Start | End | PTM                  | AScore                                                                            | Found By  |
|---------------------------------------------------------|------|--------|-----------|--------|------|-----------|---|-------|----------|---------|------------------------|---------------------|----------|-------------------------|-------|-----|----------------------|-----------------------------------------------------------------------------------|-----------|
| R.IFLAGDKD(-18.01)NVIDQIEK.Q                            | N    | 34.72  | 1798.9464 | 16     | -0.9 | 600.6555  | 3 | 32.15 | 6        | F6:1589 | OB5956<br>H1<br>Ro.raw | 3.8289E5            | 1        | 1                       | 536   | 551 |                      | D8:Dehydration:30.83                                                              | PEAKS PTM |
| K.SFNLDEGHALRIP(+15.99)SGFISYILN(+.98)R.H               | N    | 34.44  | 2635.3394 | 23     | 8.6  | 879.4612  | 3 | 36.15 | 5        | F5:1848 | OB5955<br>H1<br>Ro.raw | 1.0826E5            | 1        | 1                       | 249   | 271 | Hydroxylation Pro    | P13:Hydroxylation Pro:1000.00;N22:Deamidation (NQ):32.85                          | PEAKS DB  |
| R.NNPFYFP(+15.99)SRR.F                                  | N    | 34.32  | 1312.6312 | 10     | -0.5 | 657.3226  | 2 | 28.74 | 5        | F5:1397 | OB5955<br>H1<br>Ro.raw | 7.8182E5            | 1        | 1                       | 166   | 175 |                      | P7:Hydroxylation Pro:32.48                                                        | PEAKS DB  |
| K.NPQLQ(+.98)DLDMMLTC(+57.02)VEIK.E                     | N    | 34.13  | 1999.9595 | 17     | 9.3  | 1000.9963 | 2 | 32.90 | 4        | F4:1653 | OB5954<br>H1<br>Ro.raw | 1.9871E6            | 1        | 1                       | 415   | 431 | Carbamidomethylation | Q5:Deamidation (NQ):11.12;M10:Deamidation:0.00;C13:Carbamidomethylation:1000.00   | PEAKS PTM |
| K.DLAFPGSGE(+53.92)QVEK.L                               | N    | 33.99  | 1429.5812 | 13     | -6.3 | 715.7933  | 2 | 30.34 | 6        | F6:1518 | OB5956<br>H1<br>Ro.raw | 6.355E5             | 2        | 2                       | 555   | 567 |                      | E9:Replacement of 2 protons by iron:37.54                                         | PEAKS PTM |
| K.NPQ(+.98)LQDLDMMLTC(+57.02)VEIKEGALM(+15.99)LPHFNSK.A | N    | 33.64  | 3388.6174 | 29     | 6.0  | 1130.5532 | 3 | 38.52 | 5        | F5:2024 | OB5955<br>H1<br>Ro.raw | 7.1577E5            | 1        | 1                       | 415   | 443 | Carbamidomethylation | Q3:Deamidation (NQ):0.00;C13:Carbamidomethylation:1000.00;M22:Oxidation (M):34.40 | PEAKS DB  |
| R.VAKISM(+15.99)PVNTPGQFEDFFP(+15.99)A.S                | N    | 33.59  | 2226.0667 | 20     | -7.4 | 1114.0323 | 2 | 51.06 | 5        | F5:2785 | OB5955<br>H1<br>Ro.raw | 2.817E4             | 1        | 1                       | 279   | 298 | Oxidation (M)        | M6:Oxidation (M):1000.00;P19:Hydroxylation Pro:21.81                              | PEAKS DB  |
| N.PFYFPSR.R                                             | N    | 33.58  | 912.4493  | 7      | -0.1 | 457.2319  | 2 | 31.70 | 5        | F5:1584 | OB5955<br>H1<br>Ro.raw | 8.1854E4            | 1        | 1                       | 168   | 174 |                      |                                                                                   | PEAKS DB  |
| K.D(+53.92)LAFFPGSGEQVEK.L                              | N    | 33.35  | 1429.5812 | 13     | -4.3 | 715.7948  | 2 | 30.56 | 4        | F4:1500 | OB5954<br>H1<br>Ro.raw | 3.8253E5            | 1        | 1                       | 555   | 567 |                      | D1:Replacement of 2 protons by iron:0.00                                          | PEAKS PTM |

total 287 peptides

| Peptide                                                 | Uniq | -10lgP | Mass      | Length | ppm | m/z       | z | RT    | Fraction | Scan    | Source File      | Area roasted peanut | #Feature | #Feature roasted peanut | Start | End | PTM                                | AScore                                                                           | Found By  |
|---------------------------------------------------------|------|--------|-----------|--------|-----|-----------|---|-------|----------|---------|------------------|---------------------|----------|-------------------------|-------|-----|------------------------------------|----------------------------------------------------------------------------------|-----------|
| K.N(+.98)PQLQDLDMMLTC(+57.02)VEIKEGALM(+15.99)LPHFNSK.A | N    | 33.25  | 3388.6174 | 29     | 6.0 | 1130.5532 | 3 | 38.52 | 5        | F5:2054 | OB5955 H1 Ro.raw | 7.1577E5            | 1        | 1                       | 415   | 443 | Carbamidomethylation               | N1:Deamidation (NQ):0.00;C13:Carbamidomethylation:1000.00;M22:Oxidation (M):0.00 | PEAKS DB  |
| K.Q(+.98)FQNLQNH.R.I                                    | N    | 33.25  | 1184.5686 | 9      | 4.6 | 593.2943  | 2 | 23.68 | 5        | F5:1098 | OB5955 H1 Ro.raw | 0                   | 0        | 0                       | 199   | 207 |                                    | Q1:Deamidation (NQ):25.21                                                        | PEAKS DB  |
| K.ISMPVNTNP(+15.99)GQ(+.98)FEDFFPASSR.D                 | N    | 33.02  | 2243.0205 | 20     | 5.1 | 1122.5232 | 2 | 47.86 | 4        | F4:2523 | OB5954 H1 Ro.raw | 0                   | 0        | 0                       | 282   | 301 |                                    | P8:Hydroxylation Pro:0.00;Q10:Deamidation (NQ):31.27                             | PEAKS DB  |
| R.IFLAGDKDNVIDQ(+.98)IEK.Q                              | N    | 33.02  | 1817.9410 | 16     | 7.6 | 909.9847  | 2 | 63.08 | 6        | F6:3435 | OB5956 H1 Ro.raw | 3.476E3             | 1        | 1                       | 536   | 551 |                                    | Q13:Deamidation (NQ):11.12                                                       | PEAKS DB  |
| K.N(+.98)PQLQDLDM(+15.99)MLTC(+57.02)VEIKEGALMLPHFNSK.A | N    | 33.01  | 3388.6174 | 29     | 8.2 | 1695.3300 | 2 | 37.72 | 4        | F4:1941 | OB5954 H1 Ro.raw | 7.0286E5            | 1        | 1                       | 415   | 443 | Carbamidomethylation               | N1:Deamidation (NQ):0.00;M9:Oxidation (M):0.00;C13:Carbamidomethylation:1000.00  | PEAKS DB  |
| K.E(-18.01)GALMLPHFNSK.A                                | N    | 32.81  | 1324.6598 | 12     | 0.0 | 442.5605  | 3 | 30.63 | 5        | F5:1521 | OB5955 H1 Ro.raw | 2.0893E5            | 2        | 2                       | 432   | 443 | Pyro-glu from E                    | E1:Pyro-glu from E:1000.00                                                       | PEAKS PTM |
| R.E(-18.01)GEQEWGTP(+15.99)GSEVREETS.R.N                | Y    | 32.75  | 2159.9355 | 19     | 1.6 | 1080.9768 | 2 | 28.57 | 4        | F4:1386 | OB5954 H1 Ro.raw | 1.3772E5            | 2        | 2                       | 147   | 165 | Pyro-glu from E; Hydroxylation Pro | E1:Pyro-glu from E:1000.00;P9:Hydroxylation Pro:1000.00                          | PEAKS PTM |
| K.KNPQLQDLDM(-48.00)MLTC(+57.02)VEIK.E                  | N    | 32.73  | 2127.0703 | 18     | 1.8 | 710.0320  | 3 | 33.04 | 6        | F6:1688 | OB5956 H1 Ro.raw | 7.9877E5            | 1        | 1                       | 414   | 431 | Carbamidomethylation               | M10:Deamidation:8.14;C14:Carbamidomethylation:1000.00                            | PEAKS PTM |

total 287 peptides

| Peptide                                                 | Uniq | -10lgP | Mass      | Length | ppm  | m/z       | z | RT    | Fraction | Scan    | Source File            | Area roasted peanut | #Feature | #Feature roasted peanut | Start | End | PTM                                | AScore                                                                               | Found By  |
|---------------------------------------------------------|------|--------|-----------|--------|------|-----------|---|-------|----------|---------|------------------------|---------------------|----------|-------------------------|-------|-----|------------------------------------|--------------------------------------------------------------------------------------|-----------|
| K.KNPQLQ(+.98)DLDM(+15.99)LTC(+57.02)VEIKEGALMLPHFNSK.A | N    | 32.59  | 3516.7124 | 30     | 3.3  | 880.1883  | 4 | 35.48 | 4        | F4:1798 | OB5954<br>H1<br>Ro.raw | 7.7853E5            | 1        | 1                       | 414   | 443 | Carbamidomethylation               | Q6:Deamidation (NQ):23.13; M11:Oxidation (M):14.02; C14:Carbamidomethylation:1000.00 | PEAKS DB  |
| K.G(+43.01)T(+14.02)GNLELVAVRK.E                        | N    | 32.58  | 1312.7462 | 12     | -0.4 | 657.3801  | 2 | 27.30 | 4        | F4:1303 | OB5954<br>H1<br>Ro.raw | 3.8825E5            | 2        | 2                       | 453   | 464 | Carbamylation; Methylation(others) | G1:Carbamylation:147.00; T2:Methylation (others):68.07                               | PEAKS PTM |
| R.IPSGFISYILNR(+28.03)HDN(+162.05)QNL.R                 | N    | 32.30  | 2290.1592 | 18     | 5.9  | 764.3982  | 3 | 34.37 | 5        | F5:1737 | OB5955<br>H1<br>Ro.raw | 0                   | 0        | 0                       | 260   | 277 | Dimethylation(KR)                  | R12:Dimethylation(KR):100.00; N15:Hexose (NS Y):17.01                                | PEAKS PTM |
| K.G(+43.01)T(+14.02)GNLELVAVR.K                         | N    | 32.00  | 1184.6514 | 11     | -2.2 | 593.3317  | 2 | 30.21 | 4        | F4:1493 | OB5954<br>H1<br>Ro.raw | 1.7455E5            | 2        | 2                       | 453   | 463 | Carbamylation                      | G1:Carbamylation:100.00; T2:Methylation (others):46.31                               | PEAKS PTM |
| K.ISMP(+15.99)VNTPGQ(+.98)FEDFFPASSR.D                  | N    | 31.78  | 2243.0205 | 20     | 5.7  | 1122.5239 | 2 | 46.64 | 5        | F5:2451 | OB5955<br>H1<br>Ro.raw | 0                   | 0        | 0                       | 282   | 301 |                                    | P4:Hydroxylation Pro:24.67; Q10:Deamidation (NQ):21.91                               | PEAKS DB  |
| D.GEPDLSNNFGR.L                                         | N    | 31.47  | 1204.5472 | 11     | 3.0  | 603.2827  | 2 | 28.20 | 4        | F4:1371 | OB5954<br>H1<br>Ro.raw | 1.6138E4            | 1        | 1                       | 395   | 405 |                                    |                                                                                      | PEAKS DB  |
| K.NPQLQ(+.98)DLDMMLTC(+57.02)VEIKEGALMLPHFNSK.A         | N    | 31.45  | 3372.6226 | 29     | 7.2  | 844.1690  | 4 | 45.92 | 6        | F6:2433 | OB5956<br>H1<br>Ro.raw | 0                   | 0        | 0                       | 415   | 443 | Carbamidomethylation               | Q5:Deamidation (NQ):14.19; C13:Carbamidomethylation:1000.00                          | PEAKS DB  |
| K.KN(+.98)PQLQDLDMMLTC(+57.02)VEIKEGALMLPHFNSK.A        | N    | 31.43  | 3500.7175 | 30     | 4.4  | 1167.9182 | 3 | 36.77 | 4        | F4:1901 | OB5954<br>H1<br>Ro.raw | 9.2406E4            | 1        | 1                       | 414   | 443 | Carbamidomethylation               | N2:Deamidation (NQ):14.04; C14:Carbamidomethylation:1000.00                          | PEAKS DB  |

total 287 peptides



| Peptide                                                                     | Uniq | -10lgP | Mass      | Length | ppm  | m/z       | z | RT    | Fraction | Scan    | Source File            | Area roasted peanut | #Feature | #Feature roasted peanut | Start | End | PTM                                    | AScore                                                                                                                                                             | Found By  |
|-----------------------------------------------------------------------------|------|--------|-----------|--------|------|-----------|---|-------|----------|---------|------------------------|---------------------|----------|-------------------------|-------|-----|----------------------------------------|--------------------------------------------------------------------------------------------------------------------------------------------------------------------|-----------|
| K.IRPEGREGQEWGTPGSEVREETS.R                                                 | Y    | 31.36  | 2870.3542 | 25     | 2.3  | 718.5975  | 4 | 27.83 | 6        | F6:1355 | OB5956<br>H1<br>Ro.raw | 1.3652E5            | 1        | 1                       | 141   | 165 |                                        |                                                                                                                                                                    | PEAKS DB  |
| K.VSKEH(+15.99)VQELTK.H                                                     | N    | 31.09  | 1312.6986 | 11     | 1.8  | 657.3578  | 2 | 23.73 | 5        | F5:1100 | OB5955<br>H1<br>Ro.raw | 1.5735E3            | 1        | 1                       | 361   | 371 | Oxidation (HW)                         | H5:Oxidation (HW):1000.00                                                                                                                                          | PEAKS PTM |
| K.N(+.98)PQ(+.98)LQ(+.98)DLDM(+15.99)MLTC(+57.02)VEIKEGALM(+15.99)LPHFNSK.A | N    | 30.70  | 3406.5806 | 29     | 9.9  | 1136.5454 | 3 | 36.75 | 6        | F6:1904 | OB5956<br>H1<br>Ro.raw | 3.0926E5            | 1        | 1                       | 415   | 443 | Deamidation (NQ); Carbamidomethylation | N1:Deamidation (NQ):69.03; Q3:Deamidation (NQ):71.61; Q5:Deamidation (NQ):53.75; M9:Oxidation (M):17.01; C13:Carbamidomethylation:1000.00; M22:Oxidation (M):16.22 | PEAKS DB  |
| R.WGP(+15.99)AEPR.E                                                         | Y    | 30.70  | 827.3926  | 7      | 0.0  | 414.7036  | 2 | 24.54 | 5        | F5:1155 | OB5955<br>H1<br>Ro.raw | 3.9908E3            | 1        | 1                       | 109   | 115 |                                        | P3:Hydroxylation Pro:36.24                                                                                                                                         | PEAKS DB  |
| F.L(+226.08)AGDK(+28.03)DNVIDQIEK.Q                                         | N    | 30.44  | 1810.9135 | 14     | -0.8 | 906.4633  | 2 | 39.29 | 5        | F5:2033 | OB5955<br>H1<br>Ro.raw | 7.8052E4            | 1        | 1                       | 538   | 551 | Biotinylation; Dimethylation(KR)       | L1:Biotinylation:152.87; K5:Dimethylation(KR):178.84                                                                                                               | PEAKS PTM |
| L.R(+27.99)IPSGFISYLNR.H                                                    | N    | 29.85  | 1562.8568 | 13     | -2.0 | 782.4341  | 2 | 37.84 | 6        | F6:1976 | OB5956<br>H1<br>Ro.raw | 1.6397E5            | 1        | 1                       | 259   | 271 | Formylation                            | R1:Formylation:1000.00                                                                                                                                             | PEAKS PTM |
| R.IVQIEAR(+28.03)PN(+.98)TLVLPK.H                                           | Y    | 29.66  | 1719.0294 | 15     | -1.6 | 860.5206  | 2 | 30.29 | 6        | F6:1512 | OB5956<br>H1<br>Ro.raw | 0                   | 0        | 0                       | 208   | 222 | Dimethylation(KR); Deamidation (NQ)    | R7:Dimethylation(KR):66.64; N9:Deamidation (NQ):90.21                                                                                                              | PEAKS PTM |
| R.LFEVKPDKKNPQLQLDMM(+31.99)LTC(+57.02)VEIK.E                               | N    | 29.63  | 3163.5967 | 26     | -2.8 | 791.9042  | 4 | 32.90 | 4        | F4:1683 | OB5954<br>H1<br>Ro.raw | 1.0179E6            | 1        | 1                       | 406   | 431 | Carbamidomethylation                   | M19:Suiphone:14.02; C22:Carbamidomethylation:1000.00                                                                                                               | PEAKS PTM |
| K.ISMPVNTPGQ(+.98)FEDFFPASSR.D                                              | N    | 29.56  | 2227.0254 | 20     | 9.7  | 1114.5308 | 2 | 54.22 | 4        | F4:2901 | OB5954<br>H1<br>Ro.raw | 0                   | 0        | 0                       | 282   | 301 |                                        | Q10:Deamidation (NQ):14.58                                                                                                                                         | PEAKS DB  |

total 287 peptides

| Peptide                                                       | Uniq | -10lgP | Mass      | Length | ppm  | m/z       | z | RT    | Fraction | Scan    | Source File            | Area roasted peanut | #Feature | #Feature roasted peanut | Start | End | PTM                              | AScore                                                                                                     | Found By  |
|---------------------------------------------------------------|------|--------|-----------|--------|------|-----------|---|-------|----------|---------|------------------------|---------------------|----------|-------------------------|-------|-----|----------------------------------|------------------------------------------------------------------------------------------------------------|-----------|
| R.GRREQEW(+15.99)EEEEEEEEEGSNR.E                              | N    | 29.48  | 2666.0601 | 21     | 0.8  | 889.6946  | 3 | 26.10 | 4        | F4:1240 | OB5954<br>H1<br>Ro.raw | 0                   | 0        | 0                       | 470   | 490 | Oxidation (HW)                   | W7:Oxidation (HW):1000.00                                                                                  | PEAKS PTM |
| K.N(+.98)PQLQ(+.98)DLDMMLTC(+57.02)VEIKEGALM(+15.99)LPHFNSK.A | N    | 29.27  | 3389.6016 | 29     | 9.6  | 848.4158  | 4 | 37.65 | 6        | F6:2047 | OB5956<br>H1<br>Ro.raw | 8.4697E6            | 1        | 1                       | 415   | 443 | Carbamidomethylation             | N1:Deamidation (NQ):0.00;Q5:Deamidation (NQ):14.04;C13:Carbamidomethylation:1000.00;M22:Oxidation (M):0.00 | PEAKS DB  |
| N.TLEAAFNAEFNEIRR.V                                           | N    | 28.88  | 1779.8904 | 15     | 3.5  | 890.9556  | 2 | 33.23 | 6        | F6:1696 | OB5956<br>H1<br>Ro.raw | 1.5612E5            | 1        | 1                       | 314   | 328 |                                  |                                                                                                            | PEAKS DB  |
| K.SFN(+.98)LDEGHALR(+31.99)IPSGFISYILNR.H                     | N    | 28.71  | 2651.3342 | 23     | 9.4  | 1326.6869 | 2 | 39.13 | 4        | F4:2021 | OB5954<br>H1<br>Ro.raw | 0                   | 0        | 0                       | 249   | 271 |                                  | N3:Deamidation (NQ):38.55;R11:Dehydroxy:14.78                                                              | PEAKS PTM |
| K.ISM(+15.99)PVN(+.98)TPGQFEDFFPASSR.D                        | N    | 28.37  | 2243.0205 | 20     | 8.5  | 1122.5271 | 2 | 44.80 | 6        | F6:2368 | OB5956<br>H1<br>Ro.raw | 0                   | 0        | 0                       | 282   | 301 | Oxidation (M)                    | M3:Oxidation (M):1000.00;N6:Deamidation (NQ):0.00                                                          | PEAKS DB  |
| K.GTGNLE(+53.92)LVAVRK.E                                      | N    | 28.35  | 1309.6440 | 12     | -0.1 | 437.5553  | 3 | 27.29 | 4        | F4:1309 | OB5954<br>H1<br>Ro.raw | 2.3239E4            | 1        | 1                       | 453   | 464 | Replacement of 2 protons by iron | E6:Replacement of 2 protons by iron:60.54                                                                  | PEAKS PTM |
| D.NVIDQIEK.Q                                                  | N    | 28.35  | 957.5131  | 8      | 1.6  | 479.7646  | 2 | 28.19 | 5        | F5:1367 | OB5955<br>H1<br>Ro.raw | 2.9963E3            | 1        | 1                       | 544   | 551 |                                  |                                                                                                            | PEAKS DB  |
| K.I(+43.01)S(+14.02)MPVNTPGQFEDFFPASSR.D                      | N    | 28.31  | 2283.0630 | 20     | -0.7 | 1142.5380 | 2 | 36.01 | 6        | F6:1860 | OB5956<br>H1<br>Ro.raw | 2.4015E5            | 1        | 1                       | 282   | 301 | Carbamylation                    | I1:Carbamylation:1000.00;S2:Methylation (others):39.44                                                     | PEAKS PTM |
| R.VLLEENAGGEQEERGQRR.R                                        | N    | 28.30  | 2069.0249 | 18     | 1.0  | 518.2640  | 4 | 25.49 | 5        | F5:1205 | OB5955<br>H1<br>Ro.raw | 1.3378E5            | 1        | 1                       | 329   | 346 |                                  |                                                                                                            | PEAKS DB  |
| K.NP(+15.99)QLQDLDMMLTC(+57.02)VEIKEGALMLPHFNSK.A             | N    | 28.11  | 3387.6335 | 29     | 3.2  | 1130.2220 | 3 | 40.44 | 5        | F5:2090 | OB5955<br>H1<br>Ro.raw | 3.3176E4            | 1        | 1                       | 415   | 443 | Carbamidomethylation             | P2:Hydroxylation Pro:14.98;C13:Carbamidomethylation:1000.00                                                | PEAKS DB  |

total 287 peptides

| Peptide                                                | Uniq | -10lgP | Mass      | Length | ppm  | m/z       | z | RT    | Fraction | Scan    | Source File            | Area roasted peanut | #Feature | #Feature roasted peanut | Start | End | PTM                                          | AScore                                                                            | Found By  |
|--------------------------------------------------------|------|--------|-----------|--------|------|-----------|---|-------|----------|---------|------------------------|---------------------|----------|-------------------------|-------|-----|----------------------------------------------|-----------------------------------------------------------------------------------|-----------|
| K.AMVVVVNK(-1.03)GTGNLELVAVR.K                         | N    | 27.94  | 2080.1714 | 20     | 8.5  | 1041.1018 | 2 | 34.56 | 4        | F4:1751 | OB5954<br>H1<br>Ro.raw | 2.9653E7            | 1        | 1                       | 444   | 463 | Lysine oxidation to aminoadipic semialdehyde | K9:Lysine oxidation to aminoadipic semialdehyde:1000.00                           | PEAKS PTM |
| K.SF(+17.99)NLDEGHAI.R.I                               | N    | 27.90  | 1275.6007 | 11     | 8.1  | 638.8128  | 2 | 26.62 | 5        | F5:1267 | OB5955<br>H1<br>Ro.raw | 9.5818E3            | 1        | 1                       | 249   | 259 | Fluorination                                 | F2:Fluorination:1000.00                                                           | PEAKS PTM |
| K.SFNLDEGHAI.RIP(+15.99)SGF(+17.99)ISYILNR.H           | N    | 27.40  | 2652.3459 | 23     | 8.7  | 885.1303  | 3 | 38.95 | 5        | F5:2010 | OB5955<br>H1<br>Ro.raw | 0                   | 0        | 0                       | 249   | 271 | Hydroxylation Pro                            | P13:Hydroxylation Pro:1000.00;F16:Fluorination:38.16                              | PEAKS PTM |
| R.VLLEENAGGEQEER(+15.99).G                             | N    | 27.33  | 1587.7375 | 14     | 1.8  | 794.8775  | 2 | 26.70 | 4        | F4:1275 | OB5954<br>H1<br>Ro.raw | 0                   | 0        | 0                       | 329   | 342 |                                              | R14:Oxidation or Hydroxylation:20.88                                              | PEAKS PTM |
| K.NPQLQ(+.98)DLDM(+15.99)LTC(+57.02)VEIKEGALMLPHFNSK.A | N    | 27.25  | 3388.6174 | 29     | 8.0  | 1130.5554 | 3 | 37.44 | 5        | F5:1884 | OB5955<br>H1<br>Ro.raw | 6.7537E6            | 1        | 1                       | 415   | 443 | Carbamidomethylation                         | Q5:Deamidation (NQ):0.00;M10:Oxidation (M):12.28;C13:Carbamidomethylation:1000.00 | PEAKS DB  |
| R.N(+42.01)(+15.00)NPFYFPSRR.F                         | N    | 27.12  | 1353.6465 | 10     | 9.4  | 677.8369  | 2 | 29.74 | 5        | F5:1453 | OB5955<br>H1<br>Ro.raw | 3.0438E5            | 1        | 1                       | 166   | 175 |                                              | N1:Acetylation (N-term):1000.00;N1:Deamidation followed by a methylation:12.28    | PEAKS PTM |
| R.VAK(-1.03)ISMPVNTPGQFEDFFPASSR.D                     | N    | 27.11  | 2523.2104 | 23     | 1.1  | 1262.6139 | 2 | 36.53 | 6        | F6:1887 | OB5956<br>H1<br>Ro.raw | 0                   | 0        | 0                       | 279   | 301 | Lysine oxidation to aminoadipic semialdehyde | K3:Lysine oxidation to aminoadipic semialdehyde:1000.00                           | PEAKS PTM |
| K.NPQLQDLDMMLTC(+58.01)VEIK.E                          | N    | 26.84  | 2047.9629 | 17     | -3.6 | 1024.9850 | 2 | 46.58 | 4        | F4:2449 | OB5954<br>H1<br>Ro.raw | 0                   | 0        | 0                       | 415   | 431 | Carboxymethyl                                | C13:Carboxymethyl:1000.00                                                         | PEAKS PTM |
| R.EQEW(+15.99)EEEEEEEEEGSNREVR.R                       | N    | 26.79  | 2681.0483 | 21     | 1.1  | 894.6910  | 3 | 26.92 | 4        | F4:1316 | OB5954<br>H1<br>Ro.raw | 7.9753E4            | 1        | 1                       | 473   | 493 | Oxidation (HW)                               | W4:Oxidation (HW):1000.00                                                         | PEAKS PTM |

total 287 peptides

| Peptide                                                                 | Uniq | -10lgP | Mass      | Length | ppm  | m/z       | z | RT    | Fraction | Scan    | Source File            | Area roasted peanut | #Feature | #Feature roasted peanut | Start | End | PTM                                    | AScore                                                                                                                                  | Found By  |
|-------------------------------------------------------------------------|------|--------|-----------|--------|------|-----------|---|-------|----------|---------|------------------------|---------------------|----------|-------------------------|-------|-----|----------------------------------------|-----------------------------------------------------------------------------------------------------------------------------------------|-----------|
| K.NPQLQLDMM(+15.99)LTC(+57.02)VEIKEGALMLP(+15.99)HFNSK.A                | N    | 26.70  | 3403.6284 | 29     | -6.6 | 1702.8102 | 2 | 36.88 | 6        | F6:1908 | OB5956<br>H1<br>Ro.raw | 0                   | 0        | 0                       | 415   | 443 | Carbamidomethylation                   | M10:Oxidation (M):7.65;C13:Carbamidomethylation:1000.00;P24:Hydroxylation Pro:30.14                                                     | PEAKS DB  |
| R.IFLAGDKD(-18.01)NV.I                                                  | N    | 26.68  | 1072.5553 | 10     | 0.4  | 537.2852  | 2 | 32.21 | 4        | F4:1610 | OB5954<br>H1<br>Ro.raw | 2.1773E6            | 1        | 1                       | 536   | 545 |                                        | D8:Dehydration:45.01                                                                                                                    | PEAKS PTM |
| K.KNPQLQLDMM(-48.00)LTC(+57.02)VEIK.E                                   | N    | 26.57  | 2127.0703 | 18     | -0.4 | 710.0304  | 3 | 31.57 | 6        | F6:1598 | OB5956<br>H1<br>Ro.raw | 1.2455E5            | 1        | 1                       | 414   | 431 | Carbamidomethylation                   | M11:Dehydration:0.00;C14:Carbamidomethylation:1000.00                                                                                   | PEAKS PTM |
| K.KNPQ(+.98)LQ(+.98)DLDM(+15.99)MLTC(+57.02)VEIKEGALM(+15.99)LPHFNSK.A  | N    | 26.17  | 3533.6914 | 30     | 9.7  | 884.4387  | 4 | 35.77 | 5        | F5:1822 | OB5955<br>H1<br>Ro.raw | 2.4464E5            | 1        | 1                       | 414   | 443 | Carbamidomethylation                   | Q4:Deamidation (NQ):9.40;Q6:Deamidation (NQ):6.65;M10:Oxidation (M):0.00;C14:Carbamidomethylation:1000.00;M23:Oxidation (M):40.04       | PEAKS DB  |
| K.NPQLQ(+.98)DLDM(+15.99)M(+15.99)LTC(+57.02)VEIKEGALM(+15.99)LPHFNSK.A | N    | 26.02  | 3420.6074 | 29     | 5.5  | 1141.2161 | 3 | 34.83 | 5        | F5:1769 | OB5955<br>H1<br>Ro.raw | 2.4925E5            | 1        | 1                       | 415   | 443 | Oxidation (M);<br>Carbamidomethylation | Q5:Deamidation (NQ):11.12;M9:Oxidation (M):1000.00;M10:Oxidation (M):1000.00;C13:Carbamidomethylation:1000.00;M22:Oxidation (M):1000.00 | PEAKS DB  |
| K.AM(-48.00)VIVVVNK.G                                                   | N    | 25.96  | 923.5804  | 9      | 0.0  | 462.7975  | 2 | 25.00 | 6        | F6:1192 | OB5956<br>H1<br>Ro.raw | 6.3039E3            | 1        | 1                       | 444   | 452 | Dethiomethyl                           | M2:Dehydration:1000.00                                                                                                                  | PEAKS PTM |

total 287 peptides

| Peptide                                                           | Uniq | -10lgP | Mass      | Length | ppm | m/z       | z | RT    | Fraction | Scan    | Source File      | Area roasted peanut | #Feature | #Feature roasted peanut | Start | End | PTM | AScore                                                                            | Found By  |
|-------------------------------------------------------------------|------|--------|-----------|--------|-----|-----------|---|-------|----------|---------|------------------|---------------------|----------|-------------------------|-------|-----|-----|-----------------------------------------------------------------------------------|-----------|
| R.IVQIEARPNTLVLP(+15.99)KHADADNILVIQGGQ(+.98)ATVTVAN(+.98)GNNRK.S | Y    | 25.90  | 4436.3774 | 41     | 6.0 | 1110.1083 | 4 | 32.89 | 4        | F4:1658 | OB5954 H1 Ro.raw | 3.5945E5            | 1        | 1                       | 208   | 248 |     | P14:Hydroxylation Pro:1.99; Q29:Deamidation (N Q):0.00;N36:Deamidation (NQ):14.04 | PEAKS DB  |
| R.SSDNEGVIVKVSKEHVQELTK.H                                         | N    | 25.71  | 2325.2175 | 21     | 0.9 | 776.0804  | 3 | 28.86 | 4        | F4:1404 | OB5954 H1 Ro.raw | 0                   | 0        | 0                       | 351   | 371 |     |                                                                                   | PEAKS DB  |
| R.DQSSY(+15.99)LQGFSR.N                                           | N    | 25.52  | 1302.5840 | 11     | 1.6 | 652.3003  | 2 | 29.24 | 6        | F6:1470 | OB5956 H1 Ro.raw | 7.3464E4            | 1        | 1                       | 302   | 312 |     | Y5:Oxidation or Hydroxylation:26.36                                               | PEAKS PTM |
| total 287 peptides                                                |      |        |           |        |     |           |   |       |          |         |                  |                     |          |                         |       |     |     |                                                                                   |           |

tr|B3IXL2|B3IXL2\_ARAHY

[back to list](#)

| [Protein Coverage](#) | [Supporting Peptides](#) |

Protein Coverage:

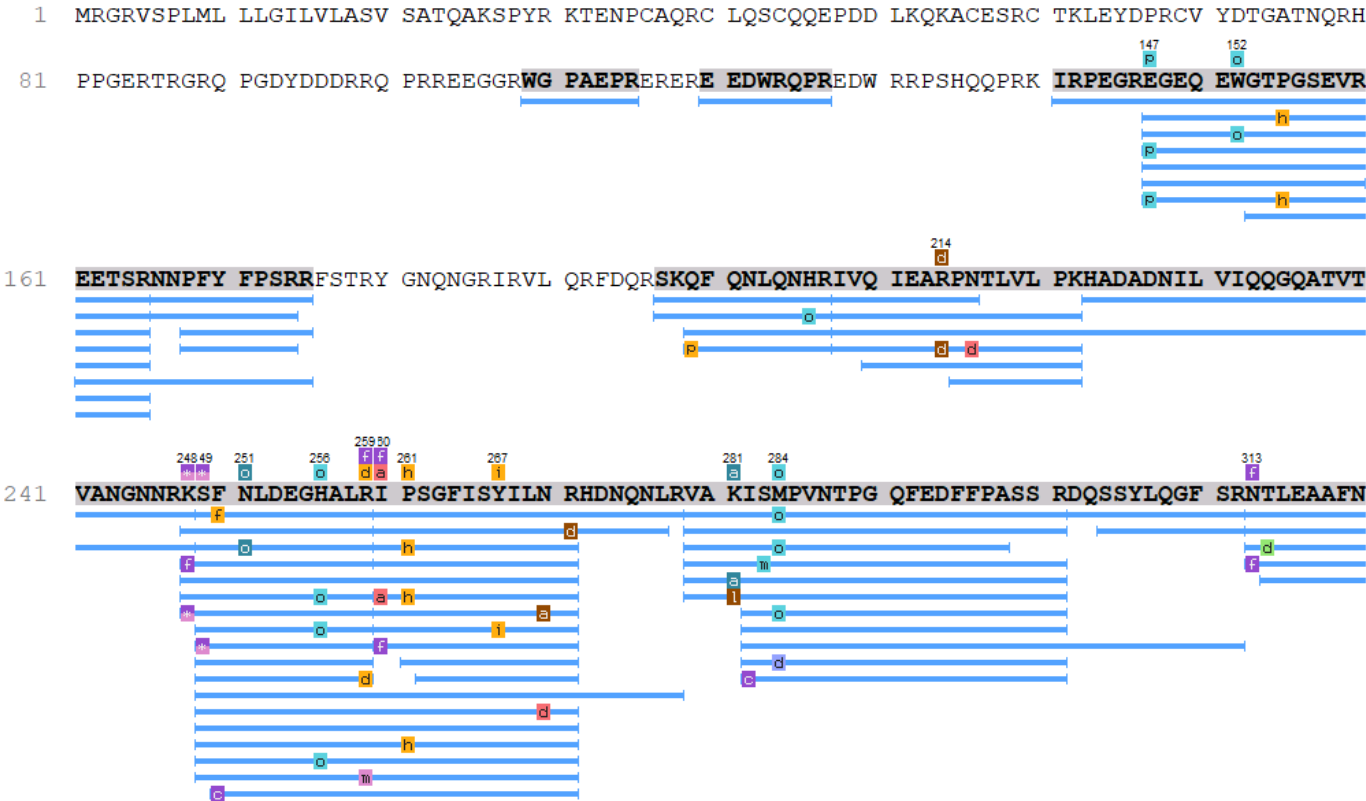

- Acetylation (K) (+42.01)
- Amidation (-0.98)
- Amidation of lysines or N-terminal amines with methyl acetimidate (+41.03)
- Ammonia-loss (N) (-17.03)
- Biotinylation (+226.08)
- Carbamidomethylation (+57.02)
- Carbamylation (+43.01)
- Carboxymethyl (+58.01)
- Deamidation (NQ) (+0.98)
- Dehydration (-18.01)
- Dimethylation(KR) (+28.03)
- Dihydroxy (+31.99)
- Dethiomethyl (-48.00)
- Formylation (+27.99)
- Fluorination (+17.99)
- Hydroxylation Pro (+15.99)
- Iodination (+125.90)
- Lysine oxidation to amino adipic semialdehyde (-1.03)
- Methylation(KR) (+14.02)
- Methylation(others) (+14.02)
- Methylphosphorylation (+77.99)
- Oxidation (M) (+15.99)
- Oxidation (HW) (+15.99)
- Oxidation or Hydroxylation (+15.99)
- Propionamide (+71.04)
- Pyro-glu from E (-18.01)
- Pyro-glu from Q (-17.03)
- Replacement of 2 protons by iron (+53.92)
- Carbamylation (+43.01), Methylation(KR) (+14.02)
- Carbamylation (+43.01), Methylation(others) (+14.02)
- Methylation(C-term) (+14.02), Carbamylation (+43.01)

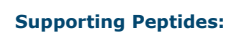[illegible]

| Peptide                                | Uniq | -10lgP | Mass      | Length | ppm  | m/z       | z | RT    | Fraction | Scan    | Source File      | Area roasted peanut | #Feature | #Feature roasted peanut | Start | End | PTM                  | AScore                                                   | Found By |
|----------------------------------------|------|--------|-----------|--------|------|-----------|---|-------|----------|---------|------------------|---------------------|----------|-------------------------|-------|-----|----------------------|----------------------------------------------------------|----------|
| K.KNPQLQDLDMMLTC(+57.02)VEIK.E         | N    | 116.47 | 2175.0737 | 18     | 3.2  | 1088.5476 | 2 | 35.21 | 5        | F5:1788 | OB5955 H1 Ro.raw | 1.5503E7            | 6        | 6                       | 414   | 431 | Carbamidomethylation | C14:Carbamidomethylation:1000.00                         | PEAKS DB |
| K.NPQLQDLDM(+15.99)LTC(+57.02)VEIK.E   | N    | 116.10 | 2062.9736 | 17     | 5.0  | 1032.4993 | 2 | 34.71 | 6        | F6:1780 | OB5956 H1 Ro.raw | 1.155E7             | 4        | 4                       | 415   | 431 | Carbamidomethylation | M10:Oxidation (M):30.46;C13:Carbamidomethylation:1000.00 | PEAKS DB |
| K.NPQLQDLDM(+15.99)MLTC(+57.02)VEIK.E  | N    | 115.70 | 2062.9736 | 17     | -4.7 | 1032.4893 | 2 | 36.62 | 4        | F4:1873 | OB5954 H1 Ro.raw | 3.8486E6            | 3        | 3                       | 415   | 431 | Carbamidomethylation | M9:Oxidation (M):30.46;C13:Carbamidomethylation:1000.00  | PEAKS DB |
| K.NPQLQDLDMMLTC(+57.02)VEIK.E          | N    | 112.86 | 2046.9788 | 17     | 0.2  | 1024.4968 | 2 | 37.11 | 6        | F6:1959 | OB5956 H1 Ro.raw | 3.5075E7            | 10       | 10                      | 415   | 431 | Carbamidomethylation | C13:Carbamidomethylation:1000.00                         | PEAKS DB |
| R.NTLEAAFNAEFNEIR.R                    | N    | 112.69 | 1737.8322 | 15     | 1.4  | 869.9246  | 2 | 35.64 | 6        | F6:1825 | OB5956 H1 Ro.raw | 1.2023E7            | 6        | 6                       | 313   | 327 |                      |                                                          | PEAKS DB |
| K.ISM(+15.99)PVNTPGQFEDFFPASSR.D       | N    | 109.35 | 2242.0364 | 20     | 8.1  | 1122.0345 | 2 | 34.52 | 6        | F6:1771 | OB5956 H1 Ro.raw | 2.1717E7            | 8        | 8                       | 282   | 301 | Oxidation (M)        | M3:Oxidation (M):1000.00                                 | PEAKS DB |
| K.ISMPVNTPGQFEDFFPASSR.D               | N    | 107.77 | 2226.0415 | 20     | 0.9  | 1114.0291 | 2 | 35.86 | 4        | F4:1823 | OB5954 H1 Ro.raw | 8.7375E7            | 15       | 15                      | 282   | 301 |                      |                                                          | PEAKS DB |
| K.HADADNILVIQGGQATVTVANGNNRK.S         | N    | 104.88 | 2746.4111 | 26     | 3.3  | 916.4807  | 3 | 29.36 | 4        | F4:1435 | OB5954 H1 Ro.raw | 3.9035E6            | 4        | 4                       | 223   | 248 |                      |                                                          | PEAKS DB |
| K.KGSEEEEDITNPINLRDGEPLSNNFGR.L        | N    | 103.39 | 3015.4170 | 27     | 3.4  | 1006.1497 | 3 | 31.62 | 4        | F4:1565 | OB5954 H1 Ro.raw | 1.1819E7            | 10       | 10                      | 379   | 405 |                      |                                                          | PEAKS DB |
| K.KNPQLQDLDM(+15.99)MLTC(+57.02)VEIK.E | N    | 103.13 | 2191.0686 | 18     | 3.6  | 1096.5455 | 2 | 34.71 | 6        | F6:1781 | OB5956 H1 Ro.raw | 1.4412E6            | 4        | 4                       | 414   | 431 | Carbamidomethylation | M10:Oxidation (M):27.96;C14:Carbamidomethylation:1000.00 | PEAKS DB |
| R.IFLAGDKDNVIDQIEK.Q                   | N    | 102.67 | 1816.9570 | 16     | 6.5  | 909.4917  | 2 | 32.54 | 4        | F4:1630 | OB5954 H1 Ro.raw | 4.3939E8            | 47       | 47                      | 536   | 551 |                      |                                                          | PEAKS DB |
| K.HADADNILVIQGGQATVTVAN(+.98)GNNRK.S   | N    | 101.58 | 2747.3950 | 26     | 3.3  | 916.8086  | 3 | 29.66 | 4        | F4:1454 | OB5954 H1 Ro.raw | 4.7756E6            | 7        | 7                       | 223   | 248 |                      | N21:Deamidation (N Q):31.91                              | PEAKS DB |
| K.AMVIVVVKGTGNLELVAVR.K                | N    | 99.57  | 2081.2031 | 20     | -0.4 | 1041.6084 | 2 | 34.57 | 4        | F4:1751 | OB5954 H1 Ro.raw | 3.4777E7            | 8        | 8                       | 444   | 463 |                      |                                                          | PEAKS DB |
| K.GSEEEEDITNPINLRDGEPLSNNFGR.L         | N    | 98.43  | 2887.3220 | 26     | -0.7 | 963.4473  | 3 | 32.67 | 6        | F6:1660 | OB5956 H1 Ro.raw | 1.2511E7            | 5        | 5                       | 380   | 405 |                      |                                                          | PEAKS DB |

total 287 peptides

| Peptide                                       | Uniq | -10lgP | Mass      | Length | ppm  | m/z       | z | RT    | Fraction | Scan    | Source File            | Area roasted peanut | #Feature | #Feature roasted peanut | Start | End | PTM                                 | AScore                                                                                  | Found By  |
|-----------------------------------------------|------|--------|-----------|--------|------|-----------|---|-------|----------|---------|------------------------|---------------------|----------|-------------------------|-------|-----|-------------------------------------|-----------------------------------------------------------------------------------------|-----------|
| K.SFNLDEGHALR.I                               | N    | 97.07  | 1257.6101 | 11     | 3.0  | 629.8142  | 2 | 28.04 | 4        | F4:1388 | OB5954<br>H1<br>Ro.raw | 1.1757E8            | 21       | 21                      | 249   | 259 |                                     |                                                                                         | PEAKS DB  |
| K.NPQLQDLDM(+15.99)M(+15.99)LTC(+57.02)VEIK.E | N    | 96.89  | 2078.9688 | 17     | 6.6  | 1040.4985 | 2 | 33.82 | 6        | F6:1726 | OB5956<br>H1<br>Ro.raw | 7.6578E4            | 2        | 2                       | 415   | 431 | Oxidation (M); Carbamidomethylation | M9:Oxidation (M):10.00.00; M10:Oxidation (M):10.00.00; C13:Carbamidomethylation:1000.00 | PEAKS DB  |
| K.AM(+15.99)VIVVVNKG TGNLELVAVR.K             | N    | 96.06  | 2097.1980 | 20     | 3.4  | 1049.6099 | 2 | 32.98 | 5        | F5:1656 | OB5955<br>H1<br>Ro.raw | 2.4028E7            | 6        | 6                       | 444   | 463 | Oxidation (M)                       | M2:Oxidation (M):10.00.00                                                               | PEAKS DB  |
| R.VLLEENAGGEQEER.G                            | N    | 95.38  | 1571.7427 | 14     | 2.2  | 786.8804  | 2 | 26.92 | 4        | F4:1300 | OB5954<br>H1<br>Ro.raw | 3.043E7             | 6        | 6                       | 329   | 342 |                                     |                                                                                         | PEAKS DB  |
| K.KNPQLQDLDMM(+15.99)LTC(+57.02)VEIK.E        | N    | 95.29  | 2191.0686 | 18     | 3.1  | 1096.5449 | 2 | 32.98 | 5        | F5:1657 | OB5955<br>H1<br>Ro.raw | 1.9358E6            | 4        | 4                       | 414   | 431 | Carbamidomethylation                | M11:Oxidation (M):23.10; C14:Carbamidomethylation:1000.00                               | PEAKS DB  |
| K.SFNLDEGHALRIPSGFISYLNR.H                    | N    | 95.27  | 2618.3604 | 23     | 1.9  | 873.7957  | 3 | 37.65 | 6        | F6:1935 | OB5956<br>H1<br>Ro.raw | 7.1821E7            | 11       | 11                      | 249   | 271 |                                     |                                                                                         | PEAKS DB  |
| R.DQSSYLQGF SR.N                              | N    | 94.26  | 1286.5891 | 11     | -0.9 | 644.3013  | 2 | 30.91 | 4        | F4:1531 | OB5954<br>H1<br>Ro.raw | 9.6573E7            | 19       | 19                      | 302   | 312 |                                     |                                                                                         | PEAKS DB  |
| R.RVLLEENAGGEQEER.G                           | N    | 93.77  | 1727.8438 | 15     | 0.2  | 576.9553  | 3 | 25.30 | 5        | F5:1185 | OB5955<br>H1<br>Ro.raw | 8.7628E5            | 6        | 6                       | 328   | 342 |                                     |                                                                                         | PEAKS DB  |
| K.NPQLQDLDMMLTC(+14.02)VEIK.E                 | N    | 93.65  | 2003.9730 | 17     | 2.7  | 1002.9965 | 2 | 38.33 | 5        | F5:1965 | OB5955<br>H1<br>Ro.raw | 5.8314E6            | 4        | 4                       | 415   | 431 |                                     | C13: Methylation (others):33.98                                                         | PEAKS PTM |
| R.IFLAGDKDNVIDQIEKQAK.D                       | N    | 92.18  | 2144.1477 | 19     | -2.1 | 715.7217  | 3 | 32.42 | 5        | F5:1625 | OB5955<br>H1<br>Ro.raw | 1.615E6             | 3        | 3                       | 536   | 554 |                                     |                                                                                         | PEAKS DB  |
| R.IPSGFISYLNR.H                               | N    | 92.13  | 1378.7609 | 12     | 1.1  | 690.3885  | 2 | 37.47 | 6        | F6:1945 | OB5956<br>H1<br>Ro.raw | 4.5588E8            | 9        | 9                       | 260   | 271 |                                     |                                                                                         | PEAKS DB  |
| K.AMVIVVVNKG TGNLELVAVRK.E                    | N    | 91.52  | 2209.2981 | 21     | 4.7  | 737.4434  | 3 | 32.59 | 4        | F4:1633 | OB5954<br>H1<br>Ro.raw | 1.2306E8            | 14       | 14                      | 444   | 464 |                                     |                                                                                         | PEAKS DB  |
| R.KSFNLDEGHALR.I                              | N    | 88.41  | 1385.7051 | 12     | 1.3  | 693.8607  | 2 | 26.06 | 5        | F5:1228 | OB5955<br>H1<br>Ro.raw | 5.4977E6            | 6        | 6                       | 248   | 259 |                                     |                                                                                         | PEAKS DB  |
| R.REQEWE EEEEEEEG SNR.E                       | N    | 88.08  | 2436.9424 | 19     | 0.6  | 813.3219  | 3 | 26.73 | 4        | F4:1278 | OB5954<br>H1<br>Ro.raw | 9.3919E5            | 7        | 7                       | 472   | 490 |                                     |                                                                                         | PEAKS DB  |
| R.EQEW(+15.99)EEEEEEEEEG SNR.E                | N    | 86.71  | 2296.8362 | 18     | 2.5  | 1149.4282 | 2 | 27.64 | 6        | F6:1309 | OB5956<br>H1<br>Ro.raw | 1.0675E6            | 3        | 3                       | 473   | 490 | Oxidation (HW)                      | W4:Oxidation (HW):1000.00                                                               | PEAKS PTM |

total 287 peptides



| Peptide                                           | Uniq | -10lgP | Mass      | Length | ppm  | m/z       | z | RT    | Fraction | Scan    | Source File            | Area roasted peanut | #Feature | #Feature roasted peanut | Start | End | PTM                  | AScore                                                  | Found By  |
|---------------------------------------------------|------|--------|-----------|--------|------|-----------|---|-------|----------|---------|------------------------|---------------------|----------|-------------------------|-------|-----|----------------------|---------------------------------------------------------|-----------|
| K.KGSEEDITNPINLR.D                                | N    | 86.46  | 1713.8533 | 15     | 4.2  | 857.9375  | 2 | 29.29 | 4        | F4:1432 | OB5954<br>H1<br>Ro.raw | 8.9159E6            | 6        | 6                       | 379   | 393 |                      |                                                         | PEAKS DB  |
| K.NPQLQDLDM(+15.99)MLTCVEIK(+14.02).E             | N    | 85.42  | 2019.9679 | 17     | 2.2  | 1010.9934 | 2 | 37.33 | 4        | F4:1920 | OB5954<br>H1<br>Ro.raw | 7.9299E5            | 2        | 2                       | 415   | 431 | Methylation(KR)      | M9:Oxidation (M):21.94;K17:Methylation (KR):1000.00     | PEAKS PTM |
| K.DLAFPGSGEQVEK.L                                 | N    | 85.27  | 1375.6619 | 13     | -0.7 | 688.8377  | 2 | 30.39 | 4        | F4:1498 | OB5954<br>H1<br>Ro.raw | 9.2216E7            | 3        | 3                       | 555   | 567 |                      |                                                         | PEAKS DB  |
| R.VLLEEN(+.98)AGGEQEER.G                          | N    | 85.22  | 1572.7267 | 14     | 2.8  | 787.3728  | 2 | 27.46 | 6        | F6:1340 | OB5956<br>H1<br>Ro.raw | 6.8644E5            | 3        | 3                       | 329   | 342 | Deamidation (NQ)     | N6:Deamidation (NQ):121.37                              | PEAKS DB  |
| K.NPQLQDLDMMLTC(+57.02)VEIKEGALMLPHFNSK.A         | N    | 85.17  | 3371.6387 | 29     | -4.9 | 1686.8184 | 2 | 38.00 | 5        | F5:1955 | OB5955<br>H1<br>Ro.raw | 1.5541E8            | 10       | 10                      | 415   | 443 | Carbamidomethylation | C13:Carbamidomethylation:1000.00                        | PEAKS DB  |
| R.DGEPDLSNNFGR.L                                  | N    | 84.59  | 1319.5742 | 12     | 0.6  | 660.7948  | 2 | 29.29 | 4        | F4:1422 | OB5954<br>H1<br>Ro.raw | 7.8399E6            | 3        | 3                       | 394   | 405 |                      |                                                         | PEAKS DB  |
| K.ISMP(+15.99)VNTPGQFEDFFPASSR.D                  | N    | 84.52  | 2242.0364 | 20     | -2.0 | 1122.0232 | 2 | 34.47 | 5        | F5:1814 | OB5955<br>H1<br>Ro.raw | 1.0743E7            | 2        | 2                       | 282   | 301 |                      | P4:Hydroxylation Pro:42.89                              | PEAKS DB  |
| R.EGEQEWGTPGSEVREETSR.N                           | Y    | 84.24  | 2161.9512 | 19     | 4.4  | 1081.9877 | 2 | 27.86 | 4        | F4:1344 | OB5954<br>H1<br>Ro.raw | 4.0932E7            | 7        | 7                       | 147   | 165 |                      |                                                         | PEAKS DB  |
| K.NPQLQDLDM(+15.99)MLTC(+57.02)VEIKEGALMLPHFNSK.A | N    | 83.17  | 3387.6335 | 29     | -0.6 | 1130.2178 | 3 | 37.70 | 4        | F4:1939 | OB5954<br>H1<br>Ro.raw | 9.055E7             | 6        | 6                       | 415   | 443 | Carbamidomethylation | M9:Oxidation (M):26.02;C13:Carbamidomethylation:1000.00 | PEAKS DB  |
| R.NTLEAAFNAEFNIRR.V                               | N    | 81.08  | 1893.9332 | 16     | -2.6 | 947.9714  | 2 | 34.11 | 5        | F5:1711 | OB5955<br>H1<br>Ro.raw | 2.8495E8            | 15       | 15                      | 313   | 328 |                      |                                                         | PEAKS DB  |
| R.GRREQEWEEEEDEEEEGSNR.E                          | N    | 80.86  | 2650.0649 | 21     | 1.1  | 884.3632  | 3 | 26.73 | 4        | F4:1280 | OB5954<br>H1<br>Ro.raw | 8.7144E5            | 6        | 6                       | 470   | 490 |                      |                                                         | PEAKS DB  |
| R.EGEQEWGTPGSEVR.E                                | Y    | 80.82  | 1559.6852 | 14     | 1.4  | 780.8510  | 2 | 28.04 | 4        | F4:1358 | OB5954<br>H1<br>Ro.raw | 3.4069E6            | 3        | 3                       | 147   | 160 |                      |                                                         | PEAKS DB  |
| K.EGALMLPHFNSK.A                                  | N    | 80.31  | 1342.6703 | 12     | 2.3  | 672.3440  | 2 | 30.63 | 5        | F5:1504 | OB5955<br>H1<br>Ro.raw | 1.4317E7            | 5        | 5                       | 432   | 443 |                      |                                                         | PEAKS DB  |
| K.SFNLDEGH(+15.99)ALR.I                           | N    | 80.04  | 1273.6051 | 11     | -0.5 | 637.8095  | 2 | 30.29 | 4        | F4:1491 | OB5954<br>H1<br>Ro.raw | 9.1981E5            | 2        | 2                       | 249   | 259 | Oxidation (HW)       | H8:Oxidation (HW):1000.00                               | PEAKS PTM |
| R.LFEVKPKDKNPQLQDLDMMLTC(+57.02)VEIK.E            | N    | 78.90  | 3131.6069 | 26     | -4.0 | 1044.8721 | 3 | 34.65 | 5        | F5:1756 | OB5955<br>H1<br>Ro.raw | 5.2558E6            | 4        | 4                       | 406   | 431 | Carbamidomethylation | C22:Carbamidomethylation:1000.00                        | PEAKS DB  |
| R.I(+27.99)FLAGDKDNVIDQIEK.Q                      | N    | 78.41  | 1844.9519 | 16     | -2.1 | 923.4813  | 2 | 36.23 | 4        | F4:1853 | OB5954<br>H1<br>Ro.raw | 2.4413E6            | 3        | 3                       | 536   | 551 | Formylation          | I1:Formylation:98.75                                    | PEAKS PTM |

total 287 peptides

| Peptide                                    | Uniq | -10lgP | Mass      | Length | ppm  | m/z       | z | RT    | Fraction | Scan    | Source File      | Area roasted peanut | #Feature | #Feature roasted peanut | Start | End | PTM                  | AScore                                                 | Found By  |
|--------------------------------------------|------|--------|-----------|--------|------|-----------|---|-------|----------|---------|------------------|---------------------|----------|-------------------------|-------|-----|----------------------|--------------------------------------------------------|-----------|
| K.GSEEDITNPINLR.D                          | N    | 78.13  | 1585.7583 | 14     | 2.3  | 793.8882  | 2 | 31.16 | 5        | F5:1548 | OB5955 H1 Ro.raw | 3.4694E6            | 3        | 3                       | 380   | 393 |                      |                                                        | PEAKS DB  |
| F.LAGDKDNVIDQIEK.Q                         | N    | 78.02  | 1556.8046 | 14     | -6.3 | 779.4047  | 2 | 32.21 | 6        | F6:1629 | OB5956 H1 Ro.raw | 5.4762E6            | 4        | 4                       | 538   | 551 |                      |                                                        | PEAKS DB  |
| K.AMVIVVVK.G                               | N    | 77.85  | 971.5837  | 9      | -0.8 | 486.7987  | 2 | 30.10 | 5        | F5:1540 | OB5955 H1 Ro.raw | 7.1402E6            | 3        | 3                       | 444   | 452 |                      |                                                        | PEAKS DB  |
| R.VAK(+42.01)ISMPVNTPGQFEDFFPASSR.D        | N    | 77.03  | 2566.2524 | 23     | 0.5  | 1284.1342 | 2 | 36.43 | 6        | F6:1881 | OB5956 H1 Ro.raw | 0                   | 0        | 0                       | 279   | 301 | Acetylation (K)      | K3:Acetylation (K):100.0.00                            | PEAKS PTM |
| K.NPQLQLDMM(-48.00)LTC(+57.02)VEIK.E       | N    | 76.61  | 1998.9755 | 17     | 1.9  | 1000.4969 | 2 | 32.85 | 6        | F6:1670 | OB5956 H1 Ro.raw | 6.204E6             | 3        | 3                       | 415   | 431 | Carbamidomethylation | M10:Deamidation:14.02;C13:Carbamidomethylation:1000.00 | PEAKS PTM |
| K.ISMPVNTP(+15.99)GQFEDFFPASSR.D           | N    | 75.57  | 2242.0364 | 20     | 1.5  | 1122.0271 | 2 | 35.64 | 6        | F6:1836 | OB5956 H1 Ro.raw | 1.0022E6            | 1        | 1                       | 282   | 301 |                      | P8:Hydroxylation Pro:10.93                             | PEAKS DB  |
| K.EGALMLPHFN(+.98)SK.A                     | N    | 75.32  | 1343.6543 | 12     | 2.6  | 672.8362  | 2 | 31.66 | 6        | F6:1595 | OB5956 H1 Ro.raw | 1.7726E5            | 2        | 2                       | 432   | 443 | Deamidation (NQ)     | N10:Deamidation (NQ):100.0.00                          | PEAKS DB  |
| R.VAKISMPVNTPGQFEDFFPASSR.D                | N    | 75.04  | 2524.2419 | 23     | -2.9 | 842.4188  | 3 | 34.29 | 5        | F5:1735 | OB5955 H1 Ro.raw | 1.671E6             | 3        | 3                       | 279   | 301 |                      |                                                        | PEAKS DB  |
| K.KNPQLQLDMLMLTC(+57.02)VEIKEGALMLPHFNSK.A | N    | 74.64  | 3499.7336 | 30     | -3.9 | 875.9373  | 4 | 36.80 | 4        | F4:1884 | OB5954 H1 Ro.raw | 6.9756E6            | 4        | 4                       | 414   | 443 | Carbamidomethylation | C14:Carbamidomethylation:1000.00                       | PEAKS DB  |
| R.NTLEAAFN(+.98)AEFNEIRR.V                 | N    | 74.52  | 1894.9172 | 16     | -2.2 | 948.4638  | 2 | 32.35 | 4        | F4:1616 | OB5954 H1 Ro.raw | 1.3754E6            | 3        | 3                       | 313   | 328 |                      | N8:Deamidation (NQ):48.12                              | PEAKS DB  |
| R.KSFNLDEGHALRIPSGFISYILNR.H               | N    | 73.99  | 2746.4553 | 24     | 0.1  | 687.6212  | 4 | 36.45 | 5        | F5:1860 | OB5955 H1 Ro.raw | 1.0287E6            | 2        | 2                       | 248   | 271 |                      |                                                        | PEAKS DB  |
| R.EETSRN(+.98)NPFFPSRR.F                   | N    | 73.61  | 1899.8864 | 15     | -0.2 | 634.3026  | 3 | 28.39 | 4        | F4:1381 | OB5954 H1 Ro.raw | 5.4651E5            | 3        | 3                       | 161   | 175 |                      | N6:Deamidation (NQ):33.98                              | PEAKS DB  |
| R.RVLEENAGGEQEERGQR.R                      | N    | 73.30  | 2069.0249 | 18     | 1.9  | 690.6835  | 3 | 25.60 | 4        | F4:1205 | OB5954 H1 Ro.raw | 1.8274E6            | 3        | 3                       | 328   | 345 |                      |                                                        | PEAKS DB  |
| K.GTGNLELVAVR.K                            | N    | 72.98  | 1127.6299 | 11     | -1.3 | 564.8215  | 2 | 30.21 | 4        | F4:1476 | OB5954 H1 Ro.raw | 2.4766E7            | 4        | 4                       | 453   | 463 |                      |                                                        | PEAKS DB  |
| K.EGALM(+15.99)LPHFNSK.A                   | N    | 72.82  | 1358.6653 | 12     | -0.5 | 680.3396  | 2 | 30.10 | 5        | F5:1469 | OB5955 H1 Ro.raw | 3.1504E6            | 5        | 5                       | 432   | 443 | Oxidation (M)        | M5:Oxidation (M):100.00                                | PEAKS DB  |
| R.IPSGFISYILN(-17.03)R.H                   | N    | 72.17  | 1361.7343 | 12     | -0.6 | 681.8740  | 2 | 38.07 | 4        | F4:1963 | OB5954 H1 Ro.raw | 1.5056E6            | 3        | 3                       | 260   | 271 | Ammonia-loss (N)     | N11:Ammonia-loss (N):100.00                            | PEAKS PTM |

total 287 peptides

| Peptide                                                   | Uniq | -10lgP | Mass      | Length | ppm  | m/z       | z | RT    | Fraction | Scan    | Source File      | Area roasted peanut | #Feature | #Feature roasted peanut | Start | End | PTM                                 | AScore                                                                            | Found By  |
|-----------------------------------------------------------|------|--------|-----------|--------|------|-----------|---|-------|----------|---------|------------------|---------------------|----------|-------------------------|-------|-----|-------------------------------------|-----------------------------------------------------------------------------------|-----------|
| R.IFLAGDKDNVIDQIEKQ(+.98)AK.D                             | N    | 71.42  | 2145.1316 | 19     | 1.5  | 716.0522  | 3 | 33.08 | 5        | F5:1661 | OB5955 H1 Ro.raw | 0                   | 0        | 0                       | 536   | 554 |                                     | Q17:Deamidation (NQ):48.83                                                        | PEAKS DB  |
| R.IPSGFISYILNRHDNQNL.R.V                                  | N    | 71.19  | 2256.1763 | 19     | 6.5  | 753.0709  | 3 | 33.61 | 6        | F6:1714 | OB5956 H1 Ro.raw | 5.9166E7            | 10       | 10                      | 260   | 278 |                                     |                                                                                   | PEAKS DB  |
| K.GTGNLELVAVRK.E                                          | N    | 70.92  | 1255.7249 | 12     | 0.7  | 628.8701  | 2 | 27.30 | 4        | F4:1290 | OB5954 H1 Ro.raw | 2.2945E7            | 7        | 7                       | 453   | 464 |                                     |                                                                                   | PEAKS DB  |
| K.KNPQLQLDMMMLTC(+57.02)VEIKEGALM(+15.99)LPHFNSK.A        | N    | 70.54  | 3515.7285 | 30     | -1.9 | 879.9377  | 4 | 36.03 | 6        | F6:1857 | OB5956 H1 Ro.raw | 6.9145E6            | 3        | 3                       | 414   | 443 | Carbamidomethylation; Oxidation (M) | C14:Carbamidomethylation:1000.00; M23:Oxidation (M):107.40                        | PEAKS DB  |
| K.NPQLQLDLM(+15.99)MLTC(+57.02)VEIKEGALM(+15.99)LPHFNSK.A | N    | 70.15  | 3403.6284 | 29     | 1.1  | 851.9153  | 4 | 37.51 | 4        | F4:1883 | OB5954 H1 Ro.raw | 7.9309E6            | 6        | 6                       | 415   | 443 | Carbamidomethylation; Oxidation (M) | M9:Oxidation (M):27.96; C13:Carbamidomethylation:1000.00; M22:Oxidation (M):71.31 | PEAKS DB  |
| R.VLLEENAGGEQEERGQR.R                                     | N    | 69.54  | 1912.9238 | 17     | 0.6  | 957.4698  | 2 | 25.30 | 5        | F5:1191 | OB5955 H1 Ro.raw | 3.4466E6            | 6        | 6                       | 329   | 345 |                                     |                                                                                   | PEAKS DB  |
| I.PSGFISYILNR.H                                           | N    | 69.26  | 1265.6768 | 11     | -5.5 | 633.8422  | 2 | 36.68 | 4        | F4:1876 | OB5954 H1 Ro.raw | 3.6428E5            | 2        | 2                       | 261   | 271 |                                     |                                                                                   | PEAKS DB  |
| R.DQS(-18.01)SYLQGFSR.N                                   | N    | 68.93  | 1268.5785 | 11     | 0.2  | 635.2966  | 2 | 30.91 | 4        | F4:1537 | OB5954 H1 Ro.raw | 6.7379E5            | 3        | 3                       | 302   | 312 |                                     | S3:Dehydration:40.00                                                              | PEAKS PTM |
| R.IP(+15.99)SGFISYILNR.H                                  | N    | 68.69  | 1394.7557 | 12     | 1.5  | 698.3862  | 2 | 37.24 | 5        | F5:1913 | OB5955 H1 Ro.raw | 6.9724E6            | 9        | 9                       | 260   | 271 | Hydroxylation Pro                   | P2:Hydroxylation Pro:1000.00                                                      | PEAKS DB  |
| K.NPQLQLDMM(+15.99)LTC(+57.02)VEIKEGALMLPHFNSK.A          | N    | 68.62  | 3387.6335 | 29     | -0.8 | 1130.2175 | 3 | 36.42 | 4        | F4:1862 | OB5954 H1 Ro.raw | 7.1368E7            | 6        | 6                       | 415   | 443 | Carbamidomethylation                | M10:Oxidation (M):24.44; C13:Carbamidomethylation:1000.00                         | PEAKS DB  |
| R.RVLLEEN(+.98)AGGEQEER.G                                 | N    | 68.51  | 1728.8278 | 15     | -0.8 | 577.2827  | 3 | 25.96 | 5        | F5:1233 | OB5955 H1 Ro.raw | 1.3591E4            | 2        | 2                       | 328   | 342 | Deamidation (NQ)                    | N7:Deamidation (NQ):77.53                                                         | PEAKS DB  |
| R.VAKISM(+15.99)PVNTPGQFEDFFPASSR.D                       | N    | 68.50  | 2540.2368 | 23     | 2.1  | 847.7546  | 3 | 32.98 | 5        | F5:1665 | OB5955 H1 Ro.raw | 5.6098E5            | 2        | 2                       | 279   | 301 | Oxidation (M)                       | M6:Oxidation (M):1000.00                                                          | PEAKS DB  |
| R.NNPFYFPSR.R                                             | N    | 68.49  | 1140.5352 | 9      | 0.9  | 571.2754  | 2 | 31.81 | 4        | F4:1575 | OB5954 H1 Ro.raw | 1.7544E7            | 5        | 5                       | 166   | 174 |                                     |                                                                                   | PEAKS DB  |

total 287 peptides

| Peptide                                                   | Uniq | -10lgP | Mass      | Length | ppm  | m/z       | z | RT    | Fraction | Scan    | Source File      | Area roasted peanut | #Feature | #Feature roasted peanut | Start | End | PTM                                    | AScore                                                                                                                        | Found By     |
|-----------------------------------------------------------|------|--------|-----------|--------|------|-----------|---|-------|----------|---------|------------------|---------------------|----------|-------------------------|-------|-----|----------------------------------------|-------------------------------------------------------------------------------------------------------------------------------|--------------|
| K.NPQLQDLDMMLTCVEIK(+14.02)EGALMLPHFNSK.A                 | N    | 68.29  | 3328.6328 | 29     | 0.9  | 833.1663  | 4 | 38.52 | 5        | F5:1986 | OB5955 H1 Ro.raw | 1.7448E7            | 6        | 6                       | 415   | 443 | Methylation(KR)                        | K17:Me<br>thylatio<br>n(KR):<br>98.15                                                                                         | PEAKS<br>PTM |
| R.NNPFYFPSRR.F                                            | N    | 67.62  | 1296.6364 | 10     | 0.0  | 649.3254  | 2 | 28.95 | 4        | F4:1567 | OB5954 H1 Ro.raw | 1.3432E8            | 8        | 8                       | 166   | 175 |                                        |                                                                                                                               | PEAKS<br>DB  |
| R.EETSRNNPFYFPSRR.F                                       | N    | 67.58  | 1898.9023 | 15     | 1.8  | 633.9759  | 3 | 27.75 | 5        | F5:1339 | OB5955 H1 Ro.raw | 9.3426E5            | 3        | 3                       | 161   | 175 |                                        |                                                                                                                               | PEAKS<br>DB  |
| R.IVQIEARPNTLVLPK.H                                       | Y    | 67.30  | 1690.0140 | 15     | 0.3  | 846.0145  | 2 | 30.46 | 5        | F5:1502 | OB5955 H1 Ro.raw | 4.7655E7            | 8        | 8                       | 208   | 222 |                                        |                                                                                                                               | PEAKS<br>DB  |
| K.KNPQLQDLDMMLTCVEIK(+14.02).E                            | N    | 66.83  | 2132.0679 | 18     | -0.6 | 1067.0405 | 2 | 36.31 | 4        | F4:1858 | OB5954 H1 Ro.raw | 6.1629E5            | 2        | 2                       | 414   | 431 | Methylation(KR)                        | K18:Me<br>thylatio<br>n(KR):<br>130.57                                                                                        | PEAKS<br>PTM |
| R.IPSGFISY(+125.90)ILNR.H                                 | N    | 65.90  | 1504.6575 | 12     | -1.9 | 753.3346  | 2 | 38.39 | 6        | F6:2001 | OB5956 H1 Ro.raw | 2.2019E5            | 2        | 2                       | 260   | 271 | Iodination                             | Y8:Iodi<br>nation:<br>1000.0<br>0                                                                                             | PEAKS<br>PTM |
| R.VLLEEN(-17.03)AGGEQEER.G                                | N    | 65.50  | 1554.7162 | 14     | 1.2  | 778.3663  | 2 | 27.73 | 5        | F5:1335 | OB5955 H1 Ro.raw | 0                   | 0        | 0                       | 329   | 342 | Ammonia-loss (N)                       | N6:Am<br>monia-l<br>oss<br>(N):10<br>00.00                                                                                    | PEAKS<br>PTM |
| K.Q(-17.03)AKDLAFPGSGEQVEK.L                              | N    | 65.43  | 1685.8260 | 16     | 0.1  | 843.9204  | 2 | 29.98 | 6        | F6:1503 | OB5956 H1 Ro.raw | 1.0547E5            | 3        | 3                       | 552   | 567 | Pyro-glu from Q                        | Q1:Pyr<br>o-glu fr<br>om Q:1<br>000.00                                                                                        | PEAKS<br>PTM |
| K.NPQLQDLDM(+15.99)M(+15.99)LTC(+57.02)VEIKEGALMLPHFNSK.A | N    | 64.96  | 3403.6284 | 29     | -3.9 | 1135.5457 | 3 | 35.83 | 6        | F6:1849 | OB5956 H1 Ro.raw | 8.47E6              | 5        | 5                       | 415   | 443 | Oxidation (M);<br>Carbamidomethylation | M9:Oxi<br>dation<br>(M):54.<br>18;M1<br>0:Oxida<br>tion<br>(M):63.<br>99;C1<br>3:Carb<br>amido<br>methyl<br>ation:1<br>000.00 | PEAKS<br>DB  |
| R.VLLEENAGGEQEER(+14.02).G                                | N    | 64.84  | 1585.7583 | 14     | 0.7  | 793.8870  | 2 | 27.86 | 4        | F4:1339 | OB5954 H1 Ro.raw | 1.7453E5            | 3        | 3                       | 329   | 342 | Methylation(KR)                        | R14:Me<br>thylatio<br>n(KR):<br>1000.0<br>0                                                                                   | PEAKS<br>PTM |
| I.FLAGDKDNVIDQIEK.Q                                       | N    | 64.23  | 1703.8729 | 15     | -5.7 | 852.9388  | 2 | 32.22 | 6        | F6:1635 | OB5956 H1 Ro.raw | 3.2256E5            | 3        | 3                       | 537   | 551 |                                        |                                                                                                                               | PEAKS<br>DB  |
| L.AGDKDNVIDQIEK.Q                                         | N    | 63.80  | 1443.7205 | 13     | -1.1 | 722.8667  | 2 | 32.43 | 4        | F4:1623 | OB5954 H1 Ro.raw | 3.3427E5            | 1        | 1                       | 539   | 551 |                                        |                                                                                                                               | PEAKS<br>DB  |
| K.HADADNILVIQQGQ(+.98)ATVTVANGNNRK.S                      | N    | 63.07  | 2747.3950 | 26     | 0.8  | 916.8063  | 3 | 31.39 | 4        | F4:1560 | OB5954 H1 Ro.raw | 0                   | 0        | 0                       | 223   | 248 |                                        | Q14:De<br>amidati<br>on (N<br>Q):0.00                                                                                         | PEAKS<br>DB  |
| K.AM(+15.99)VIVVVK.G                                      | N    | 63.02  | 987.5787  | 9      | 1.1  | 494.7972  | 2 | 27.11 | 4        | F4:1283 | OB5954 H1 Ro.raw | 1.9071E6            | 3        | 3                       | 444   | 452 | Oxidation (M)                          | M2:Oxi<br>dation<br>(M):10<br>00.00                                                                                           | PEAKS<br>DB  |
| K.DLAFP(+15.99)GSGEQVEK.L                                 | N    | 62.87  | 1391.6569 | 13     | 0.4  | 696.8360  | 2 | 29.40 | 5        | F5:1432 | OB5955 H1 Ro.raw | 8.022E5             | 3        | 3                       | 555   | 567 | Hydroxylation Pro                      | P5:Hyd<br>roxylati<br>on Pro:<br>1000.0<br>0                                                                                  | PEAKS<br>DB  |
| total 287 peptides                                        |      |        |           |        |      |           |   |       |          |         |                  |                     |          |                         |       |     |                                        |                                                                                                                               |              |

| Peptide                                           | Uniq | -10lgP | Mass      | Length | ppm  | m/z       | z | RT    | Fraction | Scan    | Source File      | Area roasted peanut | #Feature | #Feature roasted peanut | Start | End | PTM                                                                                    | AScore                                                                                                       | Found By  |
|---------------------------------------------------|------|--------|-----------|--------|------|-----------|---|-------|----------|---------|------------------|---------------------|----------|-------------------------|-------|-----|----------------------------------------------------------------------------------------|--------------------------------------------------------------------------------------------------------------|-----------|
| K.AM(+15.99)VIVVVKGTGNLELVAVRK.E                  | N    | 62.80  | 2225.2930 | 21     | -4.1 | 742.7686  | 3 | 32.36 | 6        | F6:1577 | OB5956 H1 Ro.raw | 1.1837E6            | 2        | 2                       | 444   | 464 | Oxidation (M)                                                                          | M2:Oxidation (M):1000.00                                                                                     | PEAKS DB  |
| K.NPQLQDLDMMLTC(+57.02)VEIKEGALM(+15.99)LPHFNSK.A | N    | 62.74  | 3387.6335 | 29     | -1.0 | 1130.2173 | 3 | 37.10 | 5        | F5:1900 | OB5955 H1 Ro.raw | 9.055E7             | 6        | 6                       | 415   | 443 | Carbamidomethylation; Oxidation (M)                                                    | C13:Carbamidomethylation:1000.00; M22:Oxidation (M):82.05                                                    | PEAKS DB  |
| R.SSDNEGVIVK.V                                    | N    | 62.02  | 1046.5244 | 10     | 0.4  | 524.2697  | 2 | 23.40 | 5        | F5:1065 | OB5955 H1 Ro.raw | 3.7744E5            | 3        | 3                       | 351   | 360 |                                                                                        |                                                                                                              | PEAKS DB  |
| K.QAKDLAFPGSGEQVEK.L                              | N    | 61.87  | 1702.8525 | 16     | 1.2  | 568.6255  | 3 | 27.08 | 6        | F6:1321 | OB5956 H1 Ro.raw | 2.8725E5            | 6        | 6                       | 552   | 567 |                                                                                        |                                                                                                              | PEAKS DB  |
| K.SFNLD(-18.01)EGHALR.I                           | N    | 61.63  | 1239.5996 | 11     | 2.9  | 620.8089  | 2 | 28.79 | 4        | F4:1400 | OB5954 H1 Ro.raw | 0                   | 0        | 0                       | 249   | 259 |                                                                                        | D5:Dehydration:49.79                                                                                         | PEAKS PTM |
| K.SFNLDDEGHALR(+31.99)IPSGFISYILNR.H              | N    | 60.54  | 2650.3503 | 23     | 0.1  | 884.4575  | 3 | 39.14 | 5        | F5:2021 | OB5955 H1 Ro.raw | 5.6521E5            | 1        | 1                       | 249   | 271 |                                                                                        | R11:Dehydration:46.57                                                                                        | PEAKS PTM |
| Q.SSYLQGFSR.N                                     | N    | 60.35  | 1043.5035 | 9      | 0.6  | 522.7593  | 2 | 29.24 | 6        | F6:1453 | OB5956 H1 Ro.raw | 6.7195E4            | 3        | 3                       | 304   | 312 |                                                                                        |                                                                                                              | PEAKS DB  |
| K.NPQLQDLDMMLTC(+57.02)VEIKEGALM(+15.99)LPHFNSK.A | N    | 60.02  | 3403.6284 | 29     | -8.2 | 1135.5408 | 3 | 36.74 | 5        | F5:1878 | OB5955 H1 Ro.raw | 6.6522E6            | 6        | 6                       | 415   | 443 | Carbamidomethylation; Oxidation (M)                                                    | M10:Oxidation (M):21.94; C13:Carbamidomethylation:1000.00; M22:Oxidation (M):61.26                           | PEAKS DB  |
| K.QFQNLQNHR.I                                     | N    | 59.95  | 1183.5846 | 9      | 0.0  | 592.7996  | 2 | 23.81 | 5        | F5:1102 | OB5955 H1 Ro.raw | 1.3905E5            | 5        | 5                       | 199   | 207 |                                                                                        |                                                                                                              | PEAKS DB  |
| K.Q(-17.03)FQNLQNHR.I                             | N    | 59.90  | 1166.5581 | 9      | 3.5  | 584.2884  | 2 | 28.04 | 4        | F4:1346 | OB5954 H1 Ro.raw | 5.0983E6            | 3        | 3                       | 199   | 207 | Pyro-glu from Q                                                                        | Q1:Pyro-glu from Q:1000.00                                                                                   | PEAKS PTM |
| R.I(+41.03)P(+15.99)SGFISYILNR.H                  | N    | 59.87  | 1435.7823 | 12     | -3.6 | 718.8959  | 2 | 36.92 | 6        | F6:1901 | OB5956 H1 Ro.raw | 1.7838E7            | 3        | 3                       | 260   | 271 | Amidination of lysines or N-terminal amines with methyl acetimidate; Hydroxylation Pro | I1:Amidination of lysines or N-terminal amines with methyl acetimidate:1000.00; P2:Hydroxylation Pro:1000.00 | PEAKS PTM |

total 287 peptides

| Peptide                                                    | Uniq | -10lgP | Mass      | Length | ppm  | m/z       | z | RT    | Fraction | Scan    | Source File            | Area roasted peanut | #Feature | #Feature roasted peanut | Start | End | PTM                                    | AScore                                                                            | Found By  |
|------------------------------------------------------------|------|--------|-----------|--------|------|-----------|---|-------|----------|---------|------------------------|---------------------|----------|-------------------------|-------|-----|----------------------------------------|-----------------------------------------------------------------------------------|-----------|
| K.KNPQLQLDLM(+15.99)MLTC(+57.02)VEIKEGALM(+15.99)LPHFNSK.A | N    | 59.67  | 3531.7234 | 30     | -1.9 | 883.9364  | 4 | 35.86 | 4        | F4:1821 | OB5954<br>H1<br>Ro.raw | 2.0004E6            | 3        | 3                       | 414   | 443 | Carbamidomethylation;<br>Oxidation (M) | M10:Oxidation (M):17.01;C14:Carbamidomethylation:1000.00;M23:Oxidation (M):101.58 | PEAKS DB  |
| K.NPQLQ(+.98)DLDMMLTC(+57.02)VEIK.E                        | N    | 59.63  | 2047.9629 | 17     | 1.5  | 1024.9902 | 2 | 44.46 | 6        | F6:2348 | OB5956<br>H1<br>Ro.raw | 0                   | 0        | 0                       | 415   | 431 | Carbamidomethylation                   | Q5:Deamidation (NQ):19.68;C13:Carbamidomethylation:1000.00                        | PEAKS DB  |
| R.IPSGFISYILN(+.98)RHDNQNL.R.V                             | N    | 59.62  | 2257.1604 | 19     | 4.7  | 753.3976  | 3 | 34.29 | 5        | F5:1740 | OB5955<br>H1<br>Ro.raw | 6.672E5             | 1        | 1                       | 260   | 278 |                                        | N11:Deamidation (NQ):36.24                                                        | PEAKS DB  |
| K.EGALMLPH(+14.02)FNSK.A                                   | N    | 59.24  | 1356.6860 | 12     | -3.0 | 679.3483  | 2 | 30.80 | 5        | F5:1531 | OB5955<br>H1<br>Ro.raw | 3.037E5             | 3        | 3                       | 432   | 443 | Methylation(others)                    | H8:Methylation (others):65.81                                                     | PEAKS PTM |
| A.FPGSGEQVEK.L                                             | N    | 58.82  | 1076.5138 | 10     | -3.4 | 539.2623  | 2 | 30.34 | 6        | F6:1519 | OB5956<br>H1<br>Ro.raw | 4.3607E5            | 3        | 3                       | 558   | 567 |                                        |                                                                                   | PEAKS DB  |
| K.ISM(-48.00)PVNTPGQFEDFFPASSR.D                           | N    | 58.66  | 2178.0381 | 20     | 2.8  | 727.0220  | 3 | 32.48 | 6        | F6:1652 | OB5956<br>H1<br>Ro.raw | 6.4552E6            | 4        | 4                       | 282   | 301 | Dethiomethyl                           | M3:Dethiomethyl:1000.00                                                           | PEAKS PTM |
| R.I(+27.99)PSGFISYILNR.H                                   | N    | 58.63  | 1406.7557 | 12     | 0.7  | 704.3856  | 2 | 42.27 | 5        | F5:2199 | OB5955<br>H1<br>Ro.raw | 0                   | 0        | 0                       | 260   | 271 | Formylation                            | I1:Formylation:1000.00                                                            | PEAKS PTM |
| R.LFEVKPKDKNPQLQLDMM(+15.99)LTC(+57.02)VEIK.E              | N    | 58.02  | 3147.6018 | 26     | 2.2  | 787.9095  | 4 | 33.24 | 5        | F5:1670 | OB5955<br>H1<br>Ro.raw | 2.286E6             | 2        | 2                       | 406   | 431 | Carbamidomethylation                   | M19:Oxidation (M):40.00;C22:Carbamidomethylation:1000.00                          | PEAKS DB  |
| R.EGEQEWGTPGS(+42.01)EVR.E                                 | Y    | 57.75  | 1601.6958 | 14     | 7.6  | 801.8613  | 2 | 27.46 | 6        | F6:1334 | OB5956<br>H1<br>Ro.raw | 1.0047E5            | 3        | 3                       | 147   | 160 |                                        | S11:Acetylation (TSC YH):32.97                                                    | PEAKS PTM |
| K.SFN(+15.99)LDEGHALR.I                                    | N    | 57.68  | 1273.6051 | 11     | 0.9  | 637.8104  | 2 | 27.50 | 4        | F4:1324 | OB5954<br>H1<br>Ro.raw | 9.739E5             | 3        | 3                       | 249   | 259 | Oxidation or Hydroxylation             | N3:Oxidation or Hydroxylation:55.92                                               | PEAKS PTM |
| F.NLDEGHALR.I                                              | N    | 57.57  | 1023.5097 | 9      | 0.6  | 512.7625  | 2 | 27.93 | 5        | F5:1349 | OB5955<br>H1<br>Ro.raw | 2.6681E6            | 3        | 3                       | 251   | 259 |                                        |                                                                                   | PEAKS DB  |

total 287 peptides

| Peptide                                           | Uniq | -10lgP | Mass      | Length | ppm  | m/z       | z | RT    | Fraction | Scan    | Source File      | Area roasted peanut | #Feature | #Feature roasted peanut | Start | End | PTM                                                                              | AScore                                                                                                 | Found By  |
|---------------------------------------------------|------|--------|-----------|--------|------|-----------|---|-------|----------|---------|------------------|---------------------|----------|-------------------------|-------|-----|----------------------------------------------------------------------------------|--------------------------------------------------------------------------------------------------------|-----------|
| K.A(+41.03)M(+15.99)VIVVVNKGTLNELVAVR.K           | N    | 57.55  | 2138.2246 | 20     | -5.4 | 1070.1138 | 2 | 34.47 | 5        | F5:1739 | OB5955 H1 Ro.raw | 4.5183E6            | 3        | 3                       | 444   | 463 | Amidation of lysines or N-terminal amines with methyl acetimidate; Oxidation (M) | A1:Amidation of lysines or N-terminal amines with methyl acetimidate: 207.56; M2:Oxidation (M):1000.00 | PEAKS PTM |
| K.NPQLQDLDMMLTC(+71.04)VEIK.E                     | N    | 57.51  | 2060.9944 | 17     | 3.0  | 1031.5076 | 2 | 37.24 | 5        | F5:1915 | OB5955 H1 Ro.raw | 1.057E5             | 2        | 2                       | 415   | 431 | Propionamide                                                                     | C13:Propionamide:1000.00                                                                               | PEAKS PTM |
| A.GDKDNVIDQIEK.Q                                  | N    | 57.39  | 1372.6833 | 12     | -1.5 | 687.3479  | 2 | 32.35 | 4        | F4:1613 | OB5954 H1 Ro.raw | 1.1865E6            | 3        | 3                       | 540   | 551 |                                                                                  |                                                                                                        | PEAKS DB  |
| R.K(+43.01)(+14.02)SFNLDEGHALR.I                  | N    | 55.95  | 1442.7266 | 12     | 0.0  | 722.3705  | 2 | 26.25 | 5        | F5:1250 | OB5955 H1 Ro.raw | 4.2824E5            | 6        | 6                       | 248   | 259 | Carbamylation; Methylation(KR)                                                   | K1:Carbamylation:1000.00; K1:Methylation(KR):156.90                                                    | PEAKS PTM |
| R.IPSGFISYILNRHDN(+.98)QNL.R.V                    | N    | 55.73  | 2257.1604 | 19     | -0.7 | 753.3936  | 3 | 34.26 | 4        | F4:1732 | OB5954 H1 Ro.raw | 0                   | 0        | 0                       | 260   | 278 |                                                                                  | N15:Deamidation (NQ):0.00                                                                              | PEAKS DB  |
| K.ISMPVN(+.98)TPGQFEDFFPASSR.D                    | N    | 54.95  | 2227.0254 | 20     | 6.6  | 1114.5273 | 2 | 36.77 | 4        | F4:1885 | OB5954 H1 Ro.raw | 1.011E5             | 2        | 2                       | 282   | 301 |                                                                                  | N6:Deamidation (NQ):42.68                                                                              | PEAKS DB  |
| R.K(+27.99)SFNLDEGHALR.I                          | N    | 54.77  | 1413.7001 | 12     | 1.4  | 707.8583  | 2 | 28.46 | 5        | F5:1387 | OB5955 H1 Ro.raw | 5.5831E4            | 2        | 2                       | 248   | 259 | Formylation                                                                      | K1:Formylation:1000.00                                                                                 | PEAKS PTM |
| R.LFEVKPDKK.N                                     | N    | 54.58  | 1102.6385 | 9      | 1.1  | 552.3271  | 2 | 24.84 | 4        | F4:1157 | OB5954 H1 Ro.raw | 1.1453E6            | 6        | 6                       | 406   | 414 |                                                                                  |                                                                                                        | PEAKS DB  |
| K.NPQLQDLDMMLTC(+57.02)VEIKEGALMLP(+15.99)HFNSK.A | N    | 54.18  | 3387.6335 | 29     | -0.6 | 1130.2178 | 3 | 37.70 | 4        | F4:2016 | OB5954 H1 Ro.raw | 4.3311E7            | 3        | 3                       | 415   | 443 | Carbamidomethylation; Hydroxylation Pro                                          | C13:Carbamidomethylation:1000.00; P24:Hydroxylation Pro:122.99                                         | PEAKS DB  |
| R.EGEQEWGTP(+15.99)GSEVREETS.R.N                  | Y    | 54.09  | 2177.9460 | 19     | 2.3  | 1089.9828 | 2 | 26.43 | 5        | F5:1263 | OB5955 H1 Ro.raw | 1.3271E7            | 6        | 6                       | 147   | 165 | Hydroxylation Pro                                                                | P9:Hydroxylation Pro:1000.00                                                                           | PEAKS DB  |

total 287 peptides

| Peptide                                                           | Uniq | -10lgP | Mass      | Length | ppm  | m/z       | z | RT    | Fraction | Scan    | Source File      | Area roasted peanut | #Feature | #Feature roasted peanut | Start | End | PTM                                 | AScore                                                                                                        | Found By  |
|-------------------------------------------------------------------|------|--------|-----------|--------|------|-----------|---|-------|----------|---------|------------------|---------------------|----------|-------------------------|-------|-----|-------------------------------------|---------------------------------------------------------------------------------------------------------------|-----------|
| R.IFLAGDKDNVIDQIEK(+42.01)Q(+.98)AK(+14.02).D                     | N    | 53.39  | 2201.1580 | 19     | 2.9  | 734.7288  | 3 | 32.42 | 5        | F5:1627 | OB5955 H1 Ro.raw | 4.6872E5            | 1        | 1                       | 536   | 554 |                                     | K16:Acetylation (K): 4.05; Q17:Deamidation (NQ): 20.26; K19:Methylation (KR): 4.05                            | PEAKS PTM |
| E.PDLSNNFGR.L                                                     | N    | 53.18  | 1018.4832 | 9      | 0.9  | 510.2493  | 2 | 31.57 | 6        | F6:1584 | OB5956 H1 Ro.raw | 1.3909E6            | 4        | 4                       | 397   | 405 |                                     |                                                                                                               | PEAKS DB  |
| K.NPQLQDLMM(+15.99)LTCVEIK(+14.02).E                              | N    | 53.12  | 2019.9679 | 17     | 1.7  | 1010.9930 | 2 | 35.46 | 5        | F5:1802 | OB5955 H1 Ro.raw | 4.2793E5            | 1        | 1                       | 415   | 431 | Methylation(KR)                     | M10:Oxidation (M):8.14; K17: Methylation (KR):100.00                                                          | PEAKS PTM |
| R.IFLAGDKDNVIDQ(+.98)IEKQAK.D                                     | N    | 53.10  | 2145.1316 | 19     | 1.4  | 716.0521  | 3 | 33.04 | 6        | F6:1686 | OB5956 H1 Ro.raw | 1.2146E5            | 1        | 1                       | 536   | 554 |                                     | Q13:Deamidation (NQ):25.18                                                                                    | PEAKS DB  |
| K.SFNLDEGHALRIP(+15.99)SGFISYILNR.H                               | N    | 53.04  | 2634.3552 | 23     | -3.9 | 879.1223  | 3 | 38.76 | 6        | F6:2023 | OB5956 H1 Ro.raw | 1.5218E6            | 3        | 3                       | 249   | 271 | Hydroxylation Pro                   | P13:Hydroxylation Pro:1000.00                                                                                 | PEAKS DB  |
| R.VAKIS(+77.99)MPVNTPGQFEDFFPASSR.D                               | N    | 52.77  | 2602.2290 | 23     | 2.9  | 1302.1256 | 2 | 38.06 | 5        | F5:1958 | OB5955 H1 Ro.raw | 0                   | 0        | 0                       | 279   | 301 | Methylphosphorylation               | S5:Methylphosphorylation:56.99                                                                                | PEAKS PTM |
| R.EQEWEEEEEEEEGSNREVR.R.Y                                         | N    | 52.77  | 2821.1545 | 22     | 1.7  | 941.3937  | 3 | 26.62 | 5        | F5:1273 | OB5955 H1 Ro.raw | 8.8078E5            | 3        | 3                       | 473   | 494 |                                     |                                                                                                               | PEAKS DB  |
| K.QFQNLQN(+.98)HR.I                                               | N    | 52.53  | 1184.5686 | 9      | 5.4  | 593.2948  | 2 | 23.60 | 6        | F6:1114 | OB5956 H1 Ro.raw | 8.0383E2            | 1        | 1                       | 199   | 207 |                                     | N7:Deamidation (NQ): 0.00                                                                                     | PEAKS DB  |
| N.PFYFPSRR.F                                                      | N    | 52.44  | 1068.5504 | 8      | -0.1 | 535.2824  | 2 | 28.89 | 6        | F6:1431 | OB5956 H1 Ro.raw | 4.3491E6            | 4        | 4                       | 168   | 175 |                                     |                                                                                                               | PEAKS DB  |
| K.NPQLQDLDM(+15.99)M(+15.99)LTC(+57.02)VEIKEGALM(+15.99)LPHFNSK.A | N    | 52.35  | 3419.6233 | 29     | -0.9 | 855.9124  | 4 | 34.83 | 5        | F5:1766 | OB5955 H1 Ro.raw | 1.7196E6            | 3        | 3                       | 415   | 443 | Oxidation (M); Carbamidomethylation | M9:Oxidation (M):100.00; M10:Oxidation (M):100.00; C13:Carbamidomethylation:1000.00; M22:Oxidation (M):100.00 | PEAKS DB  |
| R.VAK(+27.99)ISMPVNTPGQFEDFFPASSR.D                               | N    | 52.16  | 2552.2368 | 23     | -0.3 | 1277.1252 | 2 | 36.45 | 6        | F6:1882 | OB5956 H1 Ro.raw | 0                   | 0        | 0                       | 279   | 301 |                                     | K3:Formylation:9.40                                                                                           | PEAKS PTM |

total 287 peptides



| Peptide                                       | Uniq | -10lgP | Mass      | Length | ppm  | m/z       | z | RT    | Fraction | Scan    | Source File            | Area roasted peanut | #Feature | #Feature roasted peanut | Start | End | PTM                                | AScore                                                                       | Found By  |
|-----------------------------------------------|------|--------|-----------|--------|------|-----------|---|-------|----------|---------|------------------------|---------------------|----------|-------------------------|-------|-----|------------------------------------|------------------------------------------------------------------------------|-----------|
| K.ISMPVNTPGQFEDFFPASSRDQSSYLQGFSR.N           | N    | 52.15  | 3494.6201 | 31     | -0.9 | 1165.8796 | 3 | 36.01 | 6        | F6:1851 | OB5956<br>H1<br>Ro.raw | 4.0537E6            | 2        | 2                       | 282   | 312 |                                    |                                                                              | PEAKS DB  |
| R.V(+27.99)AKISMPVNTPGQFEDFFPASSR.D           | N    | 51.59  | 2552.2368 | 23     | -0.5 | 1277.1250 | 2 | 36.43 | 4        | F4:1865 | OB5954<br>H1<br>Ro.raw | 7.7611E5            | 1        | 1                       | 279   | 301 |                                    | V1:Formylation:0.00                                                          | PEAKS PTM |
| R.WGPAEPR.E                                   | Y    | 51.54  | 811.3976  | 7      | 1.8  | 406.7068  | 2 | 25.60 | 4        | F4:1224 | OB5954<br>H1<br>Ro.raw | 1.6393E6            | 3        | 3                       | 109   | 115 |                                    |                                                                              | PEAKS DB  |
| K.SFNLDEGHALR(+31.99).I                       | N    | 50.82  | 1289.6000 | 11     | -1.4 | 645.8063  | 2 | 30.41 | 6        | F6:1520 | OB5956<br>H1<br>Ro.raw | 0                   | 0        | 0                       | 249   | 259 | Dihydroxy                          | R11:Dihydroxy:122.75                                                         | PEAKS PTM |
| R.IFLAGD(+15.99)KDNVIDQIEK.Q                  | N    | 50.66  | 1832.9519 | 16     | -1.9 | 917.4814  | 2 | 31.99 | 4        | F4:1600 | OB5954<br>H1<br>Ro.raw | 1.5111E6            | 3        | 3                       | 536   | 551 |                                    | D6:Oxidation or Hydroxylation:12.60                                          | PEAKS PTM |
| R.VLLEE(+53.92)NAGGEQEER.G                    | N    | 50.61  | 1625.6620 | 14     | -1.0 | 542.8940  | 3 | 26.76 | 5        | F5:1278 | OB5955<br>H1<br>Ro.raw | 0                   | 0        | 0                       | 329   | 342 |                                    | E5:Replacement of 2 protons by iron:20.92                                    | PEAKS PTM |
| P.SGFISYILNR.H                                | N    | 50.48  | 1168.6240 | 10     | 1.5  | 585.3202  | 2 | 35.08 | 6        | F6:1803 | OB5956<br>H1<br>Ro.raw | 3.0349E5            | 1        | 1                       | 262   | 271 |                                    |                                                                              | PEAKS DB  |
| R.IFLAGDKDNVIDQIEK(+14.02)Q(+.98)AK(+42.01).D | N    | 50.18  | 2201.1580 | 19     | 5.4  | 734.7306  | 3 | 32.48 | 6        | F6:1657 | OB5956<br>H1<br>Ro.raw | 3.9073E5            | 1        | 1                       | 536   | 554 | Deamidation (NQ)                   | K16:Methylation(KR):7.64;Q17:Deamidation (NQ):58.99;K19:Acetylation (K):7.64 | PEAKS PTM |
| K.S(+43.01)(+14.02)FNLDEGHALR.I               | N    | 50.01  | 1314.6316 | 11     | -0.5 | 658.3228  | 2 | 28.11 | 5        | F5:1359 | OB5955<br>H1<br>Ro.raw | 1.9424E6            | 1        | 1                       | 249   | 259 | Carbamylation; Methylation(others) | S1:Carbamylation:1000.00; S1:Methylation(others):88.98                       | PEAKS PTM |
| N.LDEGHALR.I                                  | N    | 49.91  | 909.4668  | 8      | 0.0  | 455.7407  | 2 | 27.93 | 5        | F5:1350 | OB5955<br>H1<br>Ro.raw | 1.94E5              | 3        | 3                       | 252   | 259 |                                    |                                                                              | PEAKS DB  |
| K.SFNLDEGH(+15.99)ALR(+31.99)IPSGFISYILNR.H   | N    | 49.58  | 2666.3452 | 23     | 1.2  | 889.7900  | 3 | 39.33 | 6        | F6:2062 | OB5956<br>H1<br>Ro.raw | 3.3065E5            | 2        | 2                       | 249   | 271 | Oxidation (HW)                     | H8:Oxidation (HW):1000.00; R11:Dihydroxy:45.01                               | PEAKS PTM |
| K.SFNLDEGH(+15.99)ALRIPSGFISYILNR.H           | N    | 49.38  | 2634.3555 | 23     | 2.3  | 1318.1880 | 2 | 38.82 | 5        | F5:2002 | OB5955<br>H1<br>Ro.raw | 9.0457E5            | 1        | 1                       | 249   | 271 | Oxidation (HW)                     | H8:Oxidation (HW):1000.00                                                    | PEAKS PTM |
| R.ESHFVSARPQSQSP(+15.99)SSPEKEDQEEN.Q         | N    | 49.34  | 2973.2859 | 26     | 1.6  | 992.1041  | 3 | 24.81 | 6        | F6:1186 | OB5956<br>H1<br>Ro.raw | 3.8098E5            | 2        | 2                       | 574   | 599 |                                    | P14:Hydroxylation Pro:11.12                                                  | PEAKS DB  |

total 287 peptides

| Peptide                                                   | Uniq | -10lgP | Mass      | Length | ppm  | m/z      | z | RT    | Fraction | Scan    | Source File      | Area roasted peanut | #Feature | #Feature roasted peanut | Start | End | PTM                  | AScore                                                                                 | Found By  |
|-----------------------------------------------------------|------|--------|-----------|--------|------|----------|---|-------|----------|---------|------------------|---------------------|----------|-------------------------|-------|-----|----------------------|----------------------------------------------------------------------------------------|-----------|
| R.VLLE(+21.98)ENAGGEQEER.G                                | N    | 48.97  | 1593.7246 | 14     | -0.5 | 797.8692 | 2 | 26.81 | 5        | F5:1275 | OB5955 H1 Ro.raw | 4.3339E5            | 3        | 3                       | 329   | 342 |                      | E4:Sodium adduct:40.00                                                                 | PEAKS PTM |
| R.LFEVKPDK.K                                              | N    | 48.69  | 974.5436  | 8      | 1.7  | 488.2799 | 2 | 25.30 | 5        | F5:1183 | OB5955 H1 Ro.raw | 1.7748E6            | 6        | 6                       | 406   | 413 |                      |                                                                                        | PEAKS DB  |
| K.NPQLQLDMM(+15.99)LTC(+57.02)VEIKEGALMLPHFN(+.98)SK.A    | N    | 48.63  | 3388.6174 | 29     | 6.2  | 848.1669 | 4 | 36.39 | 6        | F6:1880 | OB5956 H1 Ro.raw | 2.0276E6            | 1        | 1                       | 415   | 443 | Carbamidomethylation | M10:Oxidation (M):27.96;C13:Carbamido methylation:1000.00; N27:Deamidation (N Q):18.27 | PEAKS DB  |
| R.SKQFQLQNHR.I                                            | Y    | 48.58  | 1398.7117 | 11     | -0.5 | 467.2443 | 3 | 24.46 | 4        | F4:1146 | OB5954 H1 Ro.raw | 1.2409E5            | 3        | 3                       | 197   | 207 |                      |                                                                                        | PEAKS DB  |
| R.IVQIEARPN.T                                             | Y    | 48.42  | 1038.5822 | 9      | 0.7  | 520.2987 | 2 | 25.99 | 4        | F4:1238 | OB5954 H1 Ro.raw | 4.8023E4            | 3        | 3                       | 208   | 216 |                      |                                                                                        | PEAKS DB  |
| R.N(+27.99)TLEAAFNAEFNEIRR.V                              | N    | 48.34  | 1921.9282 | 16     | -1.7 | 961.9697 | 2 | 37.51 | 4        | F4:1908 | OB5954 H1 Ro.raw | 4.2206E4            | 1        | 1                       | 313   | 328 | Formylation          | N1:Formylation:1000.00                                                                 | PEAKS PTM |
| R.NT(-18.01)LEAAFNAEFNEIRR.V                              | N    | 48.27  | 1875.9227 | 16     | -1.8 | 626.3137 | 3 | 34.20 | 4        | F4:1731 | OB5954 H1 Ro.raw | 1.108E7             | 3        | 3                       | 313   | 328 | Dehydration          | T2:Dehydration:1000.00                                                                 | PEAKS PTM |
| R.LFEVKPDKKNPQLQLDMM(+15.99)MLTC(+57.02)VEIK.E            | N    | 48.12  | 3147.6018 | 26     | -1.9 | 787.9062 | 4 | 34.20 | 4        | F4:1734 | OB5954 H1 Ro.raw | 2.5552E6            | 4        | 4                       | 406   | 431 | Carbamidomethylation | M18:Oxidation (M):33.98;C22:Carbamido methylation:1000.00                              | PEAKS DB  |
| K.KNPQLQLDMM(+15.99)LTC(+57.02)VEIKEGALM(+15.99)LPHFNSK.A | N    | 47.73  | 3531.7234 | 30     | -1.1 | 883.9372 | 4 | 35.80 | 5        | F5:1822 | OB5955 H1 Ro.raw | 0                   | 0        | 0                       | 414   | 443 | Carbamidomethylation | M11:Oxidation (M):0.00;C14:Carbamido methylation:1000.00;M23:Oxidation (M):45.87       | PEAKS DB  |
| R.DQSSY(-18.01)LQGFNR.N                                   | N    | 47.62  | 1268.5785 | 11     | -0.6 | 635.2961 | 2 | 30.85 | 6        | F6:1579 | OB5956 H1 Ro.raw | 2.6456E5            | 1        | 1                       | 302   | 312 |                      | Y5:Dehydration:0.00                                                                    | PEAKS PTM |
| K.KGSEEDIT(-18.01)N(+.98)PINLR.D                          | N    | 47.57  | 1696.8268 | 15     | 2.3  | 566.6175 | 3 | 29.07 | 6        | F6:1442 | OB5956 H1 Ro.raw | 3.8587E5            | 3        | 3                       | 379   | 393 | Deamidation (NQ)     | T9:Dehydration:45.01;N10:Deamidation (NQ):59.10                                        | PEAKS PTM |

total 287 peptides

| Peptide                                                         | Uniq | -10lgP | Mass      | Length | ppm  | m/z       | z | RT    | Fraction | Scan    | Source File      | Area roasted peanut | #Feature | #Feature roasted peanut | Start | End | PTM                                | AScore                                                                                                      | Found By  |
|-----------------------------------------------------------------|------|--------|-----------|--------|------|-----------|---|-------|----------|---------|------------------|---------------------|----------|-------------------------|-------|-----|------------------------------------|-------------------------------------------------------------------------------------------------------------|-----------|
| R.NTLEAAFNAEFN(+.98)EIR.R                                       | N    | 47.43  | 1738.8162 | 15     | 9.2  | 870.4233  | 2 | 44.36 | 5        | F5:2303 | OB5955 H1 Ro.raw | 5.1969E3            | 1        | 1                       | 313   | 327 |                                    | N12:Deamidation (NQ):0.00                                                                                   | PEAKS DB  |
| K.SFNLDEGHALRIPSGFISYILNRHDNQNL.R.V                             | N    | 47.02  | 3495.7759 | 30     | -2.1 | 700.1610  | 5 | 35.83 | 6        | F6:1842 | OB5956 H1 Ro.raw | 2.2604E6            | 2        | 2                       | 249   | 278 |                                    |                                                                                                             | PEAKS DB  |
| K.NPQLQ(+.98)DLDM(+15.99)MLTC(+57.02)VEIKEGALM(+15.99)LPHFNSK.A | N    | 47.00  | 3404.6125 | 29     | -0.4 | 1135.8777 | 3 | 36.69 | 5        | F5:1878 | OB5955 H1 Ro.raw | 3.8413E5            | 1        | 1                       | 415   | 443 | Carbamidomethylation               | Q5:Deamidation (NQ):45.47; M9:Oxidation (M):0.00; C13:Carbamidomethylation:1000.00; M22:Oxidation (M):38.75 | PEAKS DB  |
| K.D(+43.01)(+14.02)LAPGSGEQVEK.L                                | N    | 46.93  | 1432.6833 | 13     | -0.1 | 717.3489  | 2 | 31.08 | 4        | F4:1535 | OB5954 H1 Ro.raw | 9.9373E5            | 3        | 3                       | 555   | 567 | Carbamylation; Methylation(others) | D1:Carbamylation:220.79; D1:Methylation (others):132.53                                                     | PEAKS PTM |
| K.SFNLDEGHALR(+14.02)IPSGFISYILN(+.98)R.H                       | N    | 46.86  | 2633.3601 | 23     | -6.4 | 878.7883  | 3 | 36.34 | 5        | F5:1848 | OB5955 H1 Ro.raw | 1.8431E5            | 2        | 2                       | 249   | 271 | Deamidation (NQ)                   | R11:Methylation (KR):28.64; N22:Deamidation (NQ):57.71                                                      | PEAKS PTM |
| F.PGSGEQVEK.L                                                   | N    | 46.51  | 929.4454  | 9      | -3.7 | 465.7282  | 2 | 30.34 | 6        | F6:1524 | OB5956 H1 Ro.raw | 5.467E4             | 1        | 1                       | 559   | 567 |                                    |                                                                                                             | PEAKS DB  |
| R.ESHFVSARPQSQSP(+15.99)SSPEKEDQEEE.N                           | N    | 46.47  | 2859.2429 | 25     | 2.4  | 954.0906  | 3 | 24.92 | 5        | F5:1173 | OB5955 H1 Ro.raw | 7.3448E4            | 1        | 1                       | 574   | 598 |                                    | P14:Hydroxylation Pro:26.52                                                                                 | PEAKS DB  |
| R.DQSSYLQGFSR(+15.99).N                                         | N    | 46.23  | 1302.5840 | 11     | 2.5  | 652.3009  | 2 | 30.63 | 5        | F5:1518 | OB5955 H1 Ro.raw | 1.9563E5            | 4        | 4                       | 302   | 312 |                                    | R11:Oxidation or Hydroxylation:42.88                                                                        | PEAKS PTM |
| L.DEGHALR.I                                                     | N    | 45.97  | 796.3828  | 7      | 2.5  | 399.1996  | 2 | 27.93 | 5        | F5:1351 | OB5955 H1 Ro.raw | 9.4873E4            | 3        | 3                       | 253   | 259 |                                    |                                                                                                             | PEAKS DB  |
| R.LFEVKPDKKNPQLQ(+.98)DLDM(+15.99)LTC(+57.02)VEIK.E             | N    | 45.61  | 3148.5857 | 26     | 7.4  | 788.1595  | 4 | 33.17 | 5        | F5:1670 | OB5955 H1 Ro.raw | 4.4314E5            | 1        | 1                       | 406   | 431 | Carbamidomethylation               | Q14:Deamidation (NQ):0.00; M19:Oxidation (M):23.10; C22:Carbamidomethylation:1000.00                        | PEAKS DB  |
| total 287 peptides                                              |      |        |           |        |      |           |   |       |          |         |                  |                     |          |                         |       |     |                                    |                                                                                                             |           |

| Peptide                                            | Uniq | -10lgP | Mass      | Length | ppm  | m/z       | z | RT    | Fraction | Scan    | Source File      | Area roasted peanut | #Feature | #Feature roasted peanut | Start | End | PTM                                | AScore                                                   | Found By  |
|----------------------------------------------------|------|--------|-----------|--------|------|-----------|---|-------|----------|---------|------------------|---------------------|----------|-------------------------|-------|-----|------------------------------------|----------------------------------------------------------|-----------|
| S.F(+43.01)NLDE(+21.98)GHALRIPSGFISYILNR.H         | N    | 45.55  | 2596.3162 | 22     | 7.8  | 866.4528  | 3 | 40.28 | 6        | F6:2103 | OB5956 H1 Ro.raw | 2.2619E6            | 3        | 3                       | 250   | 271 | Carbamylation                      | F1:Carbamylation:100.00;E5:Sodium adduct:0.00            | PEAKS PTM |
| R.IFLAGDKDNVID.Q                                   | N    | 45.24  | 1318.6769 | 12     | 0.0  | 660.3457  | 2 | 31.81 | 4        | F4:1586 | OB5954 H1 Ro.raw | 1.1587E5            | 3        | 3                       | 536   | 547 |                                    |                                                          | PEAKS DB  |
| K.KNPQLQDLDM(+15.99)MLTC(+57.02)VEIKEGALMLPHFNSK.A | N    | 45.13  | 3515.7285 | 30     | -1.9 | 879.9377  | 4 | 35.30 | 4        | F4:1798 | OB5954 H1 Ro.raw | 6.4172E5            | 1        | 1                       | 414   | 443 | Carbamidomethylation               | M10:Oxidation (M):14.02;C14:Carbamidomethylation:1000.00 | PEAKS DB  |
| R.NTLEAAFNAEFN(+.98)EIRR.V                         | N    | 45.08  | 1894.9172 | 16     | -4.2 | 948.4619  | 2 | 33.08 | 4        | F4:1691 | OB5954 H1 Ro.raw | 2.2628E6            | 3        | 3                       | 313   | 328 |                                    | N12:Deamidation (NQ):39.02                               | PEAKS DB  |
| R.IFLAGDK(+15.99)DNVIDQIEK.Q                       | N    | 44.85  | 1832.9519 | 16     | 0.9  | 917.4841  | 2 | 31.94 | 6        | F6:1617 | OB5956 H1 Ro.raw | 3.7677E5            | 1        | 1                       | 536   | 551 |                                    | K7:Oxidation or Hydroxylation:17.01                      | PEAKS PTM |
| V.QIARPNTLVLPK.H                                   | Y    | 44.77  | 1477.8616 | 13     | -1.8 | 739.9368  | 2 | 30.56 | 4        | F4:1513 | OB5954 H1 Ro.raw | 1.5072E5            | 3        | 3                       | 210   | 222 |                                    |                                                          | PEAKS DB  |
| R.KSFNLDEGH(+15.99)ALR.I                           | N    | 44.62  | 1401.7001 | 12     | 3.9  | 701.8600  | 2 | 27.64 | 6        | F6:1349 | OB5956 H1 Ro.raw | 7.3368E4            | 2        | 2                       | 248   | 259 | Oxidation (HW)                     | H9:Oxidation (HW):1000.00                                | PEAKS PTM |
| R.N(+.98)TLEAAFNAEFNEIRR.V                         | N    | 44.42  | 1894.9172 | 16     | 3.8  | 948.4695  | 2 | 36.66 | 6        | F6:1890 | OB5956 H1 Ro.raw | 1.2834E6            | 2        | 2                       | 313   | 328 |                                    | N1:Deamidation (NQ):41.52                                | PEAKS DB  |
| R.ESHFVSARP(+15.99)QSQSPSSPEKEDQEEEN.Q             | N    | 44.15  | 2973.2859 | 26     | 2.8  | 992.1053  | 3 | 24.92 | 5        | F5:1161 | OB5955 H1 Ro.raw | 1.8315E5            | 1        | 1                       | 574   | 599 |                                    | P9:Hydroxylation Pro:18.35                               | PEAKS DB  |
| K.AMVIVVN(+.98)KGTGNLLELVAVRK.E                    | N    | 43.52  | 2210.2820 | 21     | 1.9  | 1106.1504 | 2 | 34.35 | 5        | F5:1720 | OB5955 H1 Ro.raw | 6.7558E5            | 2        | 2                       | 444   | 464 |                                    | N8:Deamidation (NQ):28.79                                | PEAKS DB  |
| R.IFLAGDKDNVIDQIEK(+14.02)(+43.01).Q               | N    | 43.38  | 1873.9785 | 16     | -1.3 | 937.9953  | 2 | 32.42 | 5        | F5:1608 | OB5955 H1 Ro.raw | 8.0571E6            | 1        | 1                       | 536   | 551 | Methylation(C-term); Carbamylation | K16:Methylation(C-term):100.00;K16:Carbamylation:128.00  | PEAKS PTM |
| R.D(-18.01)QSSYLQGFSSR.N                           | N    | 43.26  | 1268.5785 | 11     | 1.6  | 635.2975  | 2 | 29.92 | 6        | F6:1489 | OB5956 H1 Ro.raw | 0                   | 0        | 0                       | 302   | 312 |                                    | D1:Dehydration:0.00                                      | PEAKS PTM |

total 287 peptides

| Peptide                                                | Uniq | -10lgP | Mass      | Length | ppm  | m/z       | z | RT    | Fraction | Scan    | Source File      | Area roasted peanut | #Feature | #Feature roasted peanut | Start | End | PTM                                 | AScore                                                                                 | Found By  |
|--------------------------------------------------------|------|--------|-----------|--------|------|-----------|---|-------|----------|---------|------------------|---------------------|----------|-------------------------|-------|-----|-------------------------------------|----------------------------------------------------------------------------------------|-----------|
| R.LFEVKPDKKNPQLQLDM(+15.99)M(+15.99)LTC(+57.02)VEIK.E  | N    | 43.03  | 3163.5967 | 26     | -3.4 | 791.9037  | 4 | 32.67 | 6        | F6:1663 | OB5956 H1 Ro.raw | 2.1471E6            | 3        | 3                       | 406   | 431 | Oxidation (M); Carbamidomethylation | M18:Oxidation (M):1000.00; M19:Oxidation (M):1000.00; C22:Carbamidomethylation:1000.00 | PEAKS DB  |
| T.GNLELVAVRK.E                                         | N    | 43.00  | 1097.6556 | 10     | 0.5  | 549.8354  | 2 | 27.00 | 5        | F5:1296 | OB5955 H1 Ro.raw | 3.6527E5            | 3        | 3                       | 455   | 464 |                                     |                                                                                        | PEAKS DB  |
| K.KN(+.98)PQLQ(+.98)DLDMMLTC(+57.02)VEIKEGALMLPHFNSK.A | N    | 42.92  | 3501.7017 | 30     | 7.8  | 876.4395  | 4 | 36.93 | 6        | F6:1903 | OB5956 H1 Ro.raw | 5.6427E6            | 1        | 1                       | 414   | 443 | Carbamidomethylation                | N2:Deamidation (NQ):14.04; Q6:Deamidation (NQ):0.00; C14:Carbamidomethylation:1000.00  | PEAKS DB  |
| R.IFLAGDKDNVIDQIEK(+43.01)QAK(+14.02).D                | N    | 42.77  | 2201.1692 | 19     | 0.9  | 734.7310  | 3 | 32.71 | 4        | F4:1644 | OB5954 H1 Ro.raw | 3.8417E5            | 1        | 1                       | 536   | 554 |                                     | K16:Carbamylation:0.00; K19:Methylation (KR):0.00                                      | PEAKS PTM |
| K.S(+43.01)(+14.02)FNLDEGHALRIPSGFISYILNR.H            | N    | 42.43  | 2675.3818 | 23     | -1.9 | 892.7996  | 3 | 37.80 | 6        | F6:1964 | OB5956 H1 Ro.raw | 0                   | 0        | 0                       | 249   | 271 |                                     | S1:Carbamylation:1000.00; S1:Methylation (others):34.30                                | PEAKS PTM |
| K.GSEEDITNPIN(+.98)LRDGEPLSNFGR.L                      | N    | 42.34  | 2888.3059 | 26     | 6.7  | 1445.1699 | 2 | 32.90 | 4        | F4:1642 | OB5954 H1 Ro.raw | 1.8658E5            | 1        | 1                       | 380   | 405 |                                     | N12:Deamidation (NQ):12.33                                                             | PEAKS DB  |
| R.V(+43.01)LLE(+14.02)ENAGGEQEER.G                     | N    | 42.24  | 1628.7642 | 14     | 1.7  | 815.3907  | 2 | 27.00 | 5        | F5:1297 | OB5955 H1 Ro.raw | 4.2233E5            | 3        | 3                       | 329   | 342 | Carbamylation                       | V1:Carbamylation:1000.00; E4:Methylation (others):30.46                                | PEAKS PTM |
| R.I(+43.01)FLAGDK(+14.02)DNVIDQIEK.Q                   | N    | 42.15  | 1873.9785 | 16     | 4.9  | 938.0011  | 2 | 32.57 | 4        | F4:1632 | OB5954 H1 Ro.raw | 0                   | 0        | 0                       | 536   | 551 | Carbamylation; Methylation(KR)      | I1:Carbamylation:135.80; K7:Methylation (KR):195.94                                    | PEAKS PTM |

total 287 peptides

| Peptide                                                  | Uniq | -10lgP | Mass      | Length | ppm  | m/z       | z | RT    | Fraction | Scan    | Source File      | Area roasted peanut | #Feature | #Feature roasted peanut | Start | End | PTM                                                                              | AScore                                                                                                | Found By  |
|----------------------------------------------------------|------|--------|-----------|--------|------|-----------|---|-------|----------|---------|------------------|---------------------|----------|-------------------------|-------|-----|----------------------------------------------------------------------------------|-------------------------------------------------------------------------------------------------------|-----------|
| K.D(+15.99)LAFIGSGEQVEK.L                                | N    | 42.08  | 1391.6569 | 13     | 0.4  | 696.8360  | 2 | 29.40 | 5        | F5:1368 | OB5955 H1 Ro.raw | 5.511E5             | 2        | 2                       | 555   | 567 | Oxidation or Hydroxylation                                                       | D1:Oxidation or Hydroxylation:77.13                                                                   | PEAKS PTM |
| K.KNPQLQDLDM(+15.99)LT(+57.02)VEIKEGALMLPHFNSK.A         | N    | 42.02  | 3515.7285 | 30     | 1.3  | 879.9406  | 4 | 35.25 | 5        | F5:1790 | OB5955 H1 Ro.raw | 0                   | 0        | 0                       | 414   | 443 | Carbamidomethylation                                                             | M11:Oxidation (M):12.28;C14:Carbamidomethylation:1000.00                                              | PEAKS DB  |
| K.A(+41.03)M(+15.99)VIVVVKGTGNLVLAVRK.E                  | N    | 41.92  | 2266.3196 | 21     | 0.6  | 1134.1677 | 2 | 32.98 | 5        | F5:1660 | OB5955 H1 Ro.raw | 1.5326E7            | 6        | 6                       | 444   | 464 | Amidation of lysines or N-terminal amines with methyl acetimidate; Oxidation (M) | A1:Amidation of lysines or N-terminal amines with methyl acetimidate:131.34; M2:Oxidation (M):1000.00 | PEAKS PTM |
| K.EGALM(+15.99)LPHFN(+.98)SK.A                           | N    | 41.90  | 1359.6493 | 12     | 2.8  | 680.8338  | 2 | 31.22 | 4        | F4:1550 | OB5954 H1 Ro.raw | 0                   | 0        | 0                       | 432   | 443 | Oxidation (M); Deamidation (NQ)                                                  | M5:Oxidation (M):1000.00; N10:Deamidation (NQ):1000.00                                                | PEAKS DB  |
| K.NPQLQDLDM(-48.00)MLT(+57.02)VEIK.E                     | N    | 41.66  | 1998.9755 | 17     | 6.7  | 667.3369  | 3 | 34.52 | 6        | F6:1773 | OB5956 H1 Ro.raw | 2.0007E6            | 2        | 2                       | 415   | 431 | Carbamidomethylation                                                             | M9:Deamidation:11.06;C13:Carbamidomethylation:1000.00                                                 | PEAKS PTM |
| K.GTGNLVLAVRKEQQQR.G                                     | N    | 41.33  | 1925.0442 | 17     | 1.4  | 642.6896  | 3 | 26.67 | 6        | F6:1294 | OB5956 H1 Ro.raw | 2.686E4             | 1        | 1                       | 453   | 469 |                                                                                  |                                                                                                       | PEAKS DB  |
| K.NPQLQDLDMMLT(+57.02)VEIK(+43.01)EGALMLPHFNSK(+14.02).A | N    | 41.19  | 3428.6602 | 29     | -1.5 | 858.1710  | 4 | 37.84 | 6        | F6:1971 | OB5956 H1 Ro.raw | 2.9855E6            | 1        | 1                       | 415   | 443 | Carbamidomethylation                                                             | C13:Carbamidomethylation:1000.00; K17:Carbamylation:11.67;K29:Met hylation (KR):11.67                 | PEAKS PTM |

total 287 peptides

| Peptide                                          | Uniq | -10lgP | Mass      | Length | ppm  | m/z       | z | RT    | Fraction | Scan    | Source File      | Area roasted peanut | #Feature | #Feature roasted peanut | Start | End | PTM                  | AScore                                                       | Found By  |
|--------------------------------------------------|------|--------|-----------|--------|------|-----------|---|-------|----------|---------|------------------|---------------------|----------|-------------------------|-------|-----|----------------------|--------------------------------------------------------------|-----------|
| R.IFLAGDKDN(+.98)VIDQIEKQ(+.98)AK.D              | N    | 41.17  | 2146.1157 | 19     | 9.8  | 716.3862  | 3 | 32.98 | 5        | F5:1661 | OB5955 H1 Ro.raw | 1.2092E5            | 1        | 1                       | 536   | 554 |                      | N9:Deamidation (NQ): 13.83; Q17:Deamidation (NQ):17.65       | PEAKS DB  |
| K.NPQ(+.98)LQDLDMMLTC(+57.02)VEIK.E              | N    | 41.15  | 2047.9629 | 17     | 2.9  | 1024.9917 | 2 | 46.45 | 4        | F4:2441 | OB5954 H1 Ro.raw | 0                   | 0        | 0                       | 415   | 431 | Carbamidomethylation | Q3:Deamidation (NQ): 14.04; C13:Carbamidomethylation:1000.00 | PEAKS DB  |
| R.EQEWEEEEEEEEGSNREVR.R                          | N    | 41.08  | 2665.0535 | 21     | 2.4  | 889.3605  | 3 | 27.88 | 4        | F4:1353 | OB5954 H1 Ro.raw | 4.8884E4            | 1        | 1                       | 473   | 493 |                      |                                                              | PEAKS DB  |
| R.VLLEEN(+.98)AGGEQEERGQR.R                      | N    | 40.76  | 1913.9078 | 17     | -1.6 | 638.9755  | 3 | 25.99 | 4        | F4:1234 | OB5954 H1 Ro.raw | 0                   | 0        | 0                       | 329   | 345 |                      | N6:Deamidation (NQ): 28.79                                   | PEAKS DB  |
| K.GT(-18.01)GNLELVAVRK.E                         | N    | 40.55  | 1237.7142 | 12     | 2.6  | 413.5797  | 3 | 27.00 | 5        | F5:1287 | OB5955 H1 Ro.raw | 9.9167E5            | 2        | 2                       | 453   | 464 | Dehydration          | T2:Dehydration:1000.00                                       | PEAKS PTM |
| K.KNPQLQ(+.98)DLDMMLTC(+57.02)VEIKEGALMLPHFNSK.A | N    | 40.26  | 3500.7175 | 30     | 3.4  | 876.1896  | 4 | 37.51 | 4        | F4:1896 | OB5954 H1 Ro.raw | 1.6398E6            | 1        | 1                       | 414   | 443 | Carbamidomethylation | Q6:Deamidation (NQ): 12.19; C14:Carbamidomethylation:1000.00 | PEAKS DB  |
| R.EGEQEW(+15.99)GTPGSEVRETSR.N                   | Y    | 39.91  | 2177.9460 | 19     | 1.6  | 726.9905  | 3 | 26.43 | 5        | F5:1304 | OB5955 H1 Ro.raw | 1.2886E7            | 4        | 4                       | 147   | 165 | Oxidation (HW)       | W6:Oxidation (HW):1000.00                                    | PEAKS PTM |
| R.IFLAGD(+14.02)K(+43.01)DNVIDQIEK.Q             | N    | 39.86  | 1873.9785 | 16     | 1.7  | 937.9982  | 2 | 32.48 | 6        | F6:1653 | OB5956 H1 Ro.raw | 9.6228E6            | 3        | 3                       | 536   | 551 | Carbamylation        | D6: Methylation (others):18.53;K7:Carbamylation:62.41        | PEAKS PTM |
| R.E(-18.01)GEQEWGTPGSEVRETSR.N                   | Y    | 39.24  | 2143.9407 | 19     | 2.7  | 1072.9805 | 2 | 29.74 | 5        | F5:1461 | OB5955 H1 Ro.raw | 2.5488E5            | 3        | 3                       | 147   | 165 | Pyro-glu from E      | E1:Pyro-glu from E:1000.00                                   | PEAKS PTM |
| R.EEDWRQPR.E                                     | N    | 38.91  | 1114.5155 | 8      | 1.8  | 558.2661  | 2 | 23.91 | 4        | F4:1112 | OB5954 H1 Ro.raw | 0                   | 0        | 0                       | 120   | 127 |                      |                                                              | PEAKS DB  |
| R.SKQFQNLQNH(+15.99)R.I                          | Y    | 38.88  | 1414.7065 | 11     | 2.4  | 708.3622  | 2 | 24.12 | 5        | F5:1124 | OB5955 H1 Ro.raw | 1.2982E3            | 1        | 1                       | 197   | 207 | Oxidation (HW)       | H10:Oxidation (HW):1000.00                                   | PEAKS PTM |
| K.A(+43.01)MVIIVVVKGTGNLELVAVR.K                 | N    | 38.81  | 2124.2090 | 20     | 0.7  | 1063.1125 | 2 | 33.65 | 4        | F4:1688 | OB5954 H1 Ro.raw | 6.7878E5            | 3        | 3                       | 444   | 463 | Carbamylation        | A1:Carbamylation:161.20                                      | PEAKS PTM |

total 287 peptides

| Peptide                                             | Uniq | -10lgP | Mass      | Length | ppm  | m/z      | z | RT    | Fraction | Scan    | Source File      | Area roasted peanut | #Feature | #Feature roasted peanut | Start | End | PTM             | AScore                                                                                                       | Found By     |
|-----------------------------------------------------|------|--------|-----------|--------|------|----------|---|-------|----------|---------|------------------|---------------------|----------|-------------------------|-------|-----|-----------------|--------------------------------------------------------------------------------------------------------------|--------------|
| K.EGALM(-48.00)LPHFNSK.A                            | N    | 38.72  | 1294.6670 | 12     | 1.5  | 432.5636 | 3 | 28.65 | 5        | F5:1381 | OB5955 H1 Ro.raw | 3.9929E6            | 3        | 3                       | 432   | 443 | Dethiomethyl    | M5:Det<br>hiomet<br>hyl:100<br>0.00                                                                          | PEAKS<br>PTM |
| R.PNTLVLPK.H                                        | N    | 38.45  | 880.5382  | 8      | -2.9 | 441.2751 | 2 | 28.00 | 6        | F6:1374 | OB5956 H1 Ro.raw | 1.9367E5            | 2        | 2                       | 215   | 222 |                 |                                                                                                              | PEAKS<br>DB  |
| K.S(+42.01)(+14.02)FNLDEGHALR.I                     | N    | 38.42  | 1313.6364 | 11     | -3.6 | 657.8231 | 2 | 28.09 | 5        | F5:1359 | OB5955 H1 Ro.raw | 1.5617E6            | 1        | 1                       | 249   | 259 |                 | S1:Acet<br>ylation<br>(N-ter<br>m):100<br>0.00;S<br>1:Meth<br>ylation<br>(other<br>s):49.7<br>9              | PEAKS<br>PTM |
| R.IFLAGDKDN(+.98)VIDQIEK(-.98).Q                    | N    | 38.33  | 1816.9570 | 16     | 0.5  | 606.6599 | 3 | 57.76 | 5        | F5:3342 | OB5955 H1 Ro.raw | 3.1778E5            | 3        | 3                       | 536   | 551 | Amidation       | N9:Dea<br>midatio<br>n (NQ):<br>29.57;<br>K16:A<br>midatio<br>n:1000.<br>00                                  | PEAKS<br>PTM |
| K.S(-18.01)FNLD(-18.01)EGHALR(+14.02)IPSGFISYILNR.H | N    | 37.89  | 2596.3550 | 23     | -7.1 | 866.4528 | 3 | 40.28 | 6        | F6:2110 | OB5956 H1 Ro.raw | 1.4449E6            | 1        | 1                       | 249   | 271 | Methylation(KR) | S1:Deh<br>ydratio<br>n:19.6<br>1;D5:D<br>ehydrat<br>ion:34.<br>08;R1<br>1:Meth<br>ylation<br>(KR):1<br>57.81 | PEAKS<br>PTM |
| K.SFNLD(+53.92)EGHALR.I                             | N    | 37.31  | 1311.5294 | 11     | 1.0  | 438.1842 | 3 | 28.04 | 4        | F4:1362 | OB5954 H1 Ro.raw | 1.3891E5            | 2        | 2                       | 249   | 259 |                 | D5:Rep<br>laceme<br>nt of 2<br>protons<br>by iron:<br>18.17                                                  | PEAKS<br>PTM |
| R.N(+.98)TLEAAFNAEFNEIR.R                           | N    | 36.98  | 1738.8162 | 15     | 9.2  | 870.4233 | 2 | 44.36 | 5        | F5:2311 | OB5955 H1 Ro.raw | 5.1969E3            | 1        | 1                       | 313   | 327 |                 | N1:Dea<br>midatio<br>n (NQ):<br>21.41                                                                        | PEAKS<br>DB  |
| R.REQEW(+15.99)EEEEDEEEEGSNR.E                      | N    | 36.76  | 2452.9375 | 19     | -0.5 | 818.6527 | 3 | 25.98 | 4        | F4:1239 | OB5954 H1 Ro.raw | 6.7106E4            | 2        | 2                       | 472   | 490 | Oxidation (HW)  | W5:Oxi<br>dation<br>(HW):1<br>000.00                                                                         | PEAKS<br>PTM |
| R.IFLAGDK(+27.99)DNVIDQIEK.Q                        | N    | 36.69  | 1844.9519 | 16     | -0.6 | 923.4827 | 2 | 34.83 | 5        | F5:1775 | OB5955 H1 Ro.raw | 1.1863E5            | 1        | 1                       | 536   | 551 |                 | K7:For<br>mylatio<br>n:17.54                                                                                 | PEAKS<br>PTM |
| K.SFNLDE(+53.92)GHALR.I                             | N    | 36.63  | 1311.5294 | 11     | -0.2 | 438.1837 | 3 | 27.93 | 5        | F5:1353 | OB5955 H1 Ro.raw | 5.2242E4            | 1        | 1                       | 249   | 259 |                 | E6:Repl<br>acemen<br>t of 2 p<br>rotons<br>by iron:<br>16.90                                                 | PEAKS<br>PTM |
| R.IFLAGDKDNVID(-18.01)QIEK.Q                        | N    | 36.38  | 1798.9464 | 16     | 0.7  | 900.4811 | 2 | 31.39 | 6        | F6:1591 | OB5956 H1 Ro.raw | 6.7841E4            | 1        | 1                       | 536   | 551 |                 | D12:De<br>hydrati<br>on:0.00                                                                                 | PEAKS<br>PTM |

total 287 peptides



| Peptide                                                         | Uniq | -10lgP | Mass      | Length | ppm  | m/z       | z | RT    | Fraction | Scan    | Source File            | Area roasted peanut | #Feature | #Feature roasted peanut | Start | End | PTM                  | AScore                                                                                                      | Found By  |
|-----------------------------------------------------------------|------|--------|-----------|--------|------|-----------|---|-------|----------|---------|------------------------|---------------------|----------|-------------------------|-------|-----|----------------------|-------------------------------------------------------------------------------------------------------------|-----------|
| K.NPQLQ(+.98)DLDMM(+15.99)LTC(+57.02)VEIKEGALM(+15.99)LPHFNSK.A | N    | 36.05  | 3404.6125 | 29     | -1.8 | 852.1589  | 4 | 38.22 | 6        | F6:1993 | OB5956<br>H1<br>Ro.raw | 8.1948E5            | 1        | 1                       | 415   | 443 | Carbamidomethylation | Q5:Deamidation (NQ): 30.14; M10:Oxidation (M):0.00;C13:Carbamidomethylation:1000.00;M22:Oxidation (M):14.60 | PEAKS DB  |
| K.NPQLQDLDMLTCVEIK(+14.02)EGALM(+15.99)LPHFNSK.A                | N    | 36.00  | 3344.6277 | 29     | -0.2 | 837.1640  | 4 | 37.84 | 6        | F6:1961 | OB5956<br>H1<br>Ro.raw | 7.3561E6            | 2        | 2                       | 415   | 443 |                      | K17:Methylation(KR): 22.74; M22:Oxidation (M):20.37                                                         | PEAKS PTM |
| K.AMVIVVVNKGVTGN(+.98)LELVAVRK.E                                | N    | 35.97  | 2210.2820 | 21     | 6.2  | 737.7725  | 3 | 40.10 | 5        | F5:2113 | OB5955<br>H1<br>Ro.raw | 2.1847E5            | 1        | 1                       | 444   | 464 |                      | N13:Deamidation (NQ):18.40                                                                                  | PEAKS DB  |
| W.GTPGSEVRETSR.N                                                | Y    | 35.79  | 1403.6641 | 13     | 3.8  | 702.8420  | 2 | 27.77 | 5        | F5:1332 | OB5955<br>H1<br>Ro.raw | 2.4946E4            | 1        | 1                       | 153   | 165 |                      |                                                                                                             | PEAKS DB  |
| K.NPQLQDLDMLTC(+71.04)VEIKEGALMLPHFNSK.A                        | N    | 35.62  | 3385.6543 | 29     | -1.5 | 1129.5570 | 3 | 38.07 | 4        | F4:1978 | OB5954<br>H1<br>Ro.raw | 1.5713E5            | 1        | 1                       | 415   | 443 | Propionamide         | C13:Propionamide:1000.00                                                                                    | PEAKS PTM |
| R.N(-17.03)NPYFPSRR.F                                           | N    | 35.47  | 1279.6097 | 10     | 1.1  | 427.5443  | 3 | 28.89 | 6        | F6:1434 | OB5956<br>H1<br>Ro.raw | 5.7683E5            | 3        | 3                       | 166   | 175 |                      | N1:Ammonia-loss (N):9.34                                                                                    | PEAKS PTM |
| R.NTLEAAFNAEFN(+15.99)EIRR.V                                    | N    | 35.08  | 1909.9282 | 16     | 0.9  | 955.9723  | 2 | 32.98 | 5        | F5:1662 | OB5955<br>H1<br>Ro.raw | 2.4059E6            | 2        | 2                       | 313   | 328 |                      | N12:Oxidation or Hydroxylation:9.28                                                                         | PEAKS PTM |
| R.EGEQEW(+31.99)GTPGSEVRETSR.N                                  | Y    | 34.83  | 2193.9409 | 19     | 0.5  | 732.3213  | 3 | 25.57 | 6        | F6:1219 | OB5956<br>H1<br>Ro.raw | 2.9433E5            | 1        | 1                       | 147   | 165 |                      | W6:Dihydroxy: 28.36                                                                                         | PEAKS PTM |
| R.IFLAGDKD(-18.01)NVIDQIEK.Q                                    | N    | 34.72  | 1798.9464 | 16     | -0.9 | 600.6555  | 3 | 32.15 | 6        | F6:1589 | OB5956<br>H1<br>Ro.raw | 3.8289E5            | 1        | 1                       | 536   | 551 |                      | D8:Dehydration:30.83                                                                                        | PEAKS PTM |
| K.SFNLDEGHALRIP(+15.99)SGFISYILN(+.98)R.H                       | N    | 34.44  | 2635.3394 | 23     | 8.6  | 879.4612  | 3 | 36.15 | 5        | F5:1848 | OB5955<br>H1<br>Ro.raw | 1.0826E5            | 1        | 1                       | 249   | 271 | Hydroxylation Pro    | P13:Hydroxylation Pro:1000.00;N22:Deamidation (NQ): 32.85                                                   | PEAKS DB  |
| R.NNPYFYP(+15.99)SRR.F                                          | N    | 34.32  | 1312.6312 | 10     | -0.5 | 657.3226  | 2 | 28.74 | 5        | F5:1397 | OB5955<br>H1<br>Ro.raw | 7.8182E5            | 1        | 1                       | 166   | 175 |                      | P7:Hydroxylation Pro: 32.48                                                                                 | PEAKS DB  |

total 287 peptides

| Peptide                                                 | Uniq | -10lgP | Mass      | Length | ppm  | m/z       | z | RT    | Fraction | Scan    | Source File            | Area roasted peanut | #Feature | #Feature roasted peanut | Start | End | PTM                  | AScore                                                                                    | Found By  |
|---------------------------------------------------------|------|--------|-----------|--------|------|-----------|---|-------|----------|---------|------------------------|---------------------|----------|-------------------------|-------|-----|----------------------|-------------------------------------------------------------------------------------------|-----------|
| K.NPQLQ(+.98)DLDMMLTC(+57.02)VEIK.E                     | N    | 34.13  | 1999.9595 | 17     | 9.3  | 1000.9963 | 2 | 32.90 | 4        | F4:1653 | OB5954<br>H1<br>Ro.raw | 1.9871E6            | 1        | 1                       | 415   | 431 | Carbamidomethylation | Q5:Deamidation (NQ): 11.12; M10:Deamidation (NQ): 0.00; C13:Carbamidomethylation: 1000.00 | PEAKS PTM |
| K.DLAFPGSGE(+53.92)QVEK.L                               | N    | 33.99  | 1429.5812 | 13     | -6.3 | 715.7933  | 2 | 30.34 | 6        | F6:1518 | OB5956<br>H1<br>Ro.raw | 6.355E5             | 2        | 2                       | 555   | 567 |                      | E9:Replacement of 2 protons by iron: 37.54                                                | PEAKS PTM |
| K.NPQ(+.98)LQDLDMMLTC(+57.02)VEIKEGALM(+15.99)LPHFNSK.A | N    | 33.64  | 3388.6174 | 29     | 6.0  | 1130.5532 | 3 | 38.52 | 5        | F5:2024 | OB5955<br>H1<br>Ro.raw | 7.1577E5            | 1        | 1                       | 415   | 443 | Carbamidomethylation | Q3:Deamidation (NQ): 0.00; C13:Carbamidomethylation: 1000.00; M22:Oxidation (M): 34.40    | PEAKS DB  |
| R.VAKISM(+15.99)PVNTPGQFEDFFP(+15.99)A.S                | N    | 33.59  | 2226.0667 | 20     | -7.4 | 1114.0323 | 2 | 51.06 | 5        | F5:2785 | OB5955<br>H1<br>Ro.raw | 2.817E4             | 1        | 1                       | 279   | 298 | Oxidation (M)        | M6:Oxidation (M): 10.00.00; P19:Hydroxylation Pro: 21.81                                  | PEAKS DB  |
| N.PFYFPSR.R                                             | N    | 33.58  | 912.4493  | 7      | -0.1 | 457.2319  | 2 | 31.70 | 5        | F5:1584 | OB5955<br>H1<br>Ro.raw | 8.1854E4            | 1        | 1                       | 168   | 174 |                      |                                                                                           | PEAKS DB  |
| K.D(+53.92)LAFPGSGEQVEK.L                               | N    | 33.35  | 1429.5812 | 13     | -4.3 | 715.7948  | 2 | 30.56 | 4        | F4:1500 | OB5954<br>H1<br>Ro.raw | 3.8253E5            | 1        | 1                       | 555   | 567 |                      | D1:Replacement of 2 protons by iron: 0.00                                                 | PEAKS PTM |
| K.N(+.98)PQLQDLDMMLTC(+57.02)VEIKEGALM(+15.99)LPHFNSK.A | N    | 33.25  | 3388.6174 | 29     | 6.0  | 1130.5532 | 3 | 38.52 | 5        | F5:2054 | OB5955<br>H1<br>Ro.raw | 7.1577E5            | 1        | 1                       | 415   | 443 | Carbamidomethylation | N1:Deamidation (NQ): 0.00; C13:Carbamidomethylation: 1000.00; M22:Oxidation (M): 0.00     | PEAKS DB  |
| K.Q(+.98)FQNLQNHR.I                                     | N    | 33.25  | 1184.5686 | 9      | 4.6  | 593.2943  | 2 | 23.68 | 5        | F5:1098 | OB5955<br>H1<br>Ro.raw | 0                   | 0        | 0                       | 199   | 207 |                      | Q1:Deamidation (NQ): 25.21                                                                | PEAKS DB  |

total 287 peptides

| Peptide                                                 | Uniq | -10lgP | Mass      | Length | ppm  | m/z       | z | RT    | Fraction | Scan    | Source File      | Area roasted peanut | #Feature | #Feature roasted peanut | Start | End | PTM                                | AScore                                                                             | Found By  |
|---------------------------------------------------------|------|--------|-----------|--------|------|-----------|---|-------|----------|---------|------------------|---------------------|----------|-------------------------|-------|-----|------------------------------------|------------------------------------------------------------------------------------|-----------|
| K.ISMPVNTP(+15.99)GQ(+.98)FEDFFPASSR.D                  | N    | 33.02  | 2243.0205 | 20     | 5.1  | 1122.5232 | 2 | 47.86 | 4        | F4:2523 | OB5954 H1 Ro.raw | 0                   | 0        | 0                       | 282   | 301 |                                    | P8:Hydroxylation Pro:0.00;Q10:Deamidation (NQ):31.27                               | PEAKS DB  |
| R.IFLAGDKDNVIDQ(+.98)IEK.Q                              | N    | 33.02  | 1817.9410 | 16     | 7.6  | 909.9847  | 2 | 63.08 | 6        | F6:3435 | OB5956 H1 Ro.raw | 3.476E3             | 1        | 1                       | 536   | 551 |                                    | Q13:Deamidation (NQ):11.12                                                         | PEAKS DB  |
| K.N(+.98)PQLQDLDM(+15.99)MLTC(+57.02)VEIKEGALMLPHFNSK.A | N    | 33.01  | 3388.6174 | 29     | 8.2  | 1695.3300 | 2 | 37.72 | 4        | F4:1941 | OB5954 H1 Ro.raw | 7.0286E5            | 1        | 1                       | 415   | 443 | Carbamidomethylation               | N1:Deamidation (NQ):0.00;M9:Oxidation (M):0.00;C13:Carbamidomethylation:1000.00    | PEAKS DB  |
| K.E(-18.01)GALMLPHFNSK.A                                | N    | 32.81  | 1324.6598 | 12     | 0.0  | 442.5605  | 3 | 30.63 | 5        | F5:1521 | OB5955 H1 Ro.raw | 2.0893E5            | 2        | 2                       | 432   | 443 | Pyro-glu from E                    | E1:Pyro-glu from E:1000.00                                                         | PEAKS PTM |
| R.E(-18.01)GEQEWGTP(+15.99)GSEVRETSR.N                  | Y    | 32.75  | 2159.9355 | 19     | 1.6  | 1080.9768 | 2 | 28.57 | 4        | F4:1386 | OB5954 H1 Ro.raw | 1.3772E5            | 2        | 2                       | 147   | 165 | Pyro-glu from E; Hydroxylation Pro | E1:Pyro-glu from E:1000.00;P9:Hydroxylation Pro:1000.00                            | PEAKS PTM |
| K.KNPQLQDLDM(-48.00)MLTC(+57.02)VEIK.E                  | N    | 32.73  | 2127.0703 | 18     | 1.8  | 710.0320  | 3 | 33.04 | 6        | F6:1688 | OB5956 H1 Ro.raw | 7.9877E5            | 1        | 1                       | 414   | 431 | Carbamidomethylation               | M10:Deamidation (NQ):8.14;C14:Carbamidomethylation:1000.00                         | PEAKS PTM |
| K.KNPQLQ(+.98)DLDM(+15.99)LTC(+57.02)VEIKEGALMLPHFNSK.A | N    | 32.59  | 3516.7124 | 30     | 3.3  | 880.1883  | 4 | 35.48 | 4        | F4:1798 | OB5954 H1 Ro.raw | 7.7853E5            | 1        | 1                       | 414   | 443 | Carbamidomethylation               | Q6:Deamidation (NQ):23.13;M11:Oxidation (M):14.02;C14:Carbamidomethylation:1000.00 | PEAKS DB  |
| K.G(+43.01)T(+14.02)GNLELVAVRK.E                        | N    | 32.58  | 1312.7462 | 12     | -0.4 | 657.3801  | 2 | 27.30 | 4        | F4:1303 | OB5954 H1 Ro.raw | 3.8825E5            | 2        | 2                       | 453   | 464 | Carbamylation; Methylation(others) | G1:Carbamylation:147.00;T2:Methylation (others):68.07                              | PEAKS PTM |

total 287 peptides

| Peptide                                          | Uniq | -10lgP | Mass      | Length | ppm  | m/z       | z | RT    | Fraction | Scan    | Source File      | Area roasted peanut | #Feature | #Feature roasted peanut | Start | End | PTM                  | AScore                                                      | Found By  |
|--------------------------------------------------|------|--------|-----------|--------|------|-----------|---|-------|----------|---------|------------------|---------------------|----------|-------------------------|-------|-----|----------------------|-------------------------------------------------------------|-----------|
| R.IPSGFISYILNR(+28.03)HDN(+162.05)QNL.R          | N    | 32.30  | 2290.1592 | 18     | 5.9  | 764.3982  | 3 | 34.37 | 5        | F5:1737 | OB5955 H1 Ro.raw | 0                   | 0        | 0                       | 260   | 277 | Dimethylation(KR)    | R12:Dimethylation(KR):100.00;N15:Hexose (NS Y):17.01        | PEAKS PTM |
| K.G(+43.01)T(+14.02)GNLELVAVR.K                  | N    | 32.00  | 1184.6514 | 11     | -2.2 | 593.3317  | 2 | 30.21 | 4        | F4:1493 | OB5954 H1 Ro.raw | 1.7455E5            | 2        | 2                       | 453   | 463 | Carbamylation        | G1:Carbamylation:100.00;T2:Methylation (others):46.31       | PEAKS PTM |
| K.ISMP(+15.99)VNTPGQ(+.98)FEDFFPASSR.D           | N    | 31.78  | 2243.0205 | 20     | 5.7  | 1122.5239 | 2 | 46.64 | 5        | F5:2451 | OB5955 H1 Ro.raw | 0                   | 0        | 0                       | 282   | 301 |                      | P4:Hydroxylation Pro:24.67; Q10:Deamidation (N Q):21.91     | PEAKS DB  |
| D.GEPDLSNNFGR.L                                  | N    | 31.47  | 1204.5472 | 11     | 3.0  | 603.2827  | 2 | 28.20 | 4        | F4:1371 | OB5954 H1 Ro.raw | 1.6138E4            | 1        | 1                       | 395   | 405 |                      |                                                             | PEAKS DB  |
| K.NPQLQ(+.98)DLDMMLTC(+57.02)VEIKEGALMLPHFNSK.A  | N    | 31.45  | 3372.6226 | 29     | 7.2  | 844.1690  | 4 | 45.92 | 6        | F6:2433 | OB5956 H1 Ro.raw | 0                   | 0        | 0                       | 415   | 443 | Carbamidomethylation | Q5:Deamidation (NQ):14.19; C13:Carbamidomethylation:1000.00 | PEAKS DB  |
| K.KN(+.98)PQLQDLDMMLTC(+57.02)VEIKEGALMLPHFNSK.A | N    | 31.43  | 3500.7175 | 30     | 4.4  | 1167.9182 | 3 | 36.77 | 4        | F4:1901 | OB5954 H1 Ro.raw | 9.2406E4            | 1        | 1                       | 414   | 443 | Carbamidomethylation | N2:Deamidation (NQ):14.04; C14:Carbamidomethylation:1000.00 | PEAKS DB  |
| K.IRPEGREGQEWGTPGSEVREETSR.N                     | Y    | 31.36  | 2870.3542 | 25     | 2.3  | 718.5975  | 4 | 27.83 | 6        | F6:1355 | OB5956 H1 Ro.raw | 1.3652E5            | 1        | 1                       | 141   | 165 |                      |                                                             | PEAKS DB  |
| K.VSKEH(+15.99)VQELTK.H                          | N    | 31.09  | 1312.6986 | 11     | 1.8  | 657.3578  | 2 | 23.73 | 5        | F5:1100 | OB5955 H1 Ro.raw | 1.5735E3            | 1        | 1                       | 361   | 371 | Oxidation (HW)       | H5:Oxidation (HW):1000.00                                   | PEAKS PTM |

total 287 peptides

| Peptide                                                                     | Uniq | -10lgP | Mass      | Length | ppm  | m/z       | z | RT    | Fraction | Scan    | Source File      | Area roasted peanut | #Feature | #Feature roasted peanut | Start | End | PTM                                    | AScore                                                                                                                                                             | Found By  |
|-----------------------------------------------------------------------------|------|--------|-----------|--------|------|-----------|---|-------|----------|---------|------------------|---------------------|----------|-------------------------|-------|-----|----------------------------------------|--------------------------------------------------------------------------------------------------------------------------------------------------------------------|-----------|
| K.N(+.98)PQ(+.98)LQ(+.98)DLDM(+15.99)MLTC(+57.02)VEIKEGALM(+15.99)LPHFNSK.A | N    | 30.70  | 3406.5806 | 29     | 9.9  | 1136.5454 | 3 | 36.75 | 6        | F6:1904 | OB5956 H1 Ro.raw | 3.0926E5            | 1        | 1                       | 415   | 443 | Deamidation (NQ); Carbamidomethylation | N1:Deamidation (NQ):69.03; Q3:Deamidation (NQ):71.61; Q5:Deamidation (NQ):53.75; M9:Oxidation (M):17.01; C13:Carbamidomethylation:1000.00; M22:Oxidation (M):16.22 | PEAKS DB  |
| R.WGP(+15.99)AEPR.E                                                         | Y    | 30.70  | 827.3926  | 7      | 0.0  | 414.7036  | 2 | 24.54 | 5        | F5:1155 | OB5955 H1 Ro.raw | 3.9908E3            | 1        | 1                       | 109   | 115 |                                        | P3:Hydroxylation Pro:36.24                                                                                                                                         | PEAKS DB  |
| F.L(+226.08)AGDK(+28.03)DNVIDQIEK.Q                                         | N    | 30.44  | 1810.9135 | 14     | -0.8 | 906.4633  | 2 | 39.29 | 5        | F5:2033 | OB5955 H1 Ro.raw | 7.8052E4            | 1        | 1                       | 538   | 551 | Biotinylation; Dimethylation(KR)       | L1:Biotinylation:152.87; K5:Dimethylation(KR):178.84                                                                                                               | PEAKS PTM |
| L.R(+27.99)IPSGFISYILNR.H                                                   | N    | 29.85  | 1562.8568 | 13     | -2.0 | 782.4341  | 2 | 37.84 | 6        | F6:1976 | OB5956 H1 Ro.raw | 1.6397E5            | 1        | 1                       | 259   | 271 | Formylation                            | R1:Formylation:1000.00                                                                                                                                             | PEAKS PTM |
| R.IVQIEAR(+28.03)PN(+.98)TLVLPK.H                                           | Y    | 29.66  | 1719.0294 | 15     | -1.6 | 860.5206  | 2 | 30.29 | 6        | F6:1512 | OB5956 H1 Ro.raw | 0                   | 0        | 0                       | 208   | 222 | Dimethylation(KR); Deamidation (NQ)    | R7:Dimethylation(KR):66.64; N9:Deamidation (NQ):90.21                                                                                                              | PEAKS PTM |
| R.LFEVKPDKKNPQLQDLDMM(+31.99)LTC(+57.02)VEIK.E                              | N    | 29.63  | 3163.5967 | 26     | -2.8 | 791.9042  | 4 | 32.90 | 4        | F4:1683 | OB5954 H1 Ro.raw | 1.0179E6            | 1        | 1                       | 406   | 431 | Carbamidomethylation                   | M19:Suiphone:14.02; C22:Carbamidomethylation:1000.00                                                                                                               | PEAKS PTM |
| K.ISMPVNTPGQ(+.98)FEDFFPASSR.D                                              | N    | 29.56  | 2227.0254 | 20     | 9.7  | 1114.5308 | 2 | 54.22 | 4        | F4:2901 | OB5954 H1 Ro.raw | 0                   | 0        | 0                       | 282   | 301 |                                        | Q10:Deamidation (NQ):14.58                                                                                                                                         | PEAKS DB  |
| R.GRREQEW(+15.99)EEEEEEEEEGSNR.E                                            | N    | 29.48  | 2666.0601 | 21     | 0.8  | 889.6946  | 3 | 26.10 | 4        | F4:1240 | OB5954 H1 Ro.raw | 0                   | 0        | 0                       | 470   | 490 | Oxidation (HW)                         | W7:Oxidation (HW):1000.00                                                                                                                                          | PEAKS PTM |

total 287 peptides

| Peptide                                                       | Uniq | -10lgP | Mass      | Length | ppm  | m/z       | z | RT    | Fraction | Scan    | Source File            | Area roasted peanut | #Feature | #Feature roasted peanut | Start | End | PTM                              | AScore                                                                                                     | Found By  |
|---------------------------------------------------------------|------|--------|-----------|--------|------|-----------|---|-------|----------|---------|------------------------|---------------------|----------|-------------------------|-------|-----|----------------------------------|------------------------------------------------------------------------------------------------------------|-----------|
| K.N(+.98)PQLQ(+.98)DLDMMLTC(+57.02)VEIKEGALM(+15.99)LPHFNSK.A | N    | 29.27  | 3389.6016 | 29     | 9.6  | 848.4158  | 4 | 37.65 | 6        | F6:2047 | OB5956<br>H1<br>Ro.raw | 8.4697E6            | 1        | 1                       | 415   | 443 | Carbamidomethylation             | N1:Deamidation (NQ):0.00;Q5:Deamidation (NQ):14.04;C13:Carbamidomethylation:1000.00;M22:Oxidation (M):0.00 | PEAKS DB  |
| N.TLEAAFNAEFNEIRR.V                                           | N    | 28.88  | 1779.8904 | 15     | 3.5  | 890.9556  | 2 | 33.23 | 6        | F6:1696 | OB5956<br>H1<br>Ro.raw | 1.5612E5            | 1        | 1                       | 314   | 328 |                                  |                                                                                                            | PEAKS DB  |
| K.SFN(+.98)LDEGHALR(+31.99)IPSGFISYILNR.H                     | N    | 28.71  | 2651.3342 | 23     | 9.4  | 1326.6869 | 2 | 39.13 | 4        | F4:2021 | OB5954<br>H1<br>Ro.raw | 0                   | 0        | 0                       | 249   | 271 |                                  | N3:Deamidation (NQ):38.55;R11:Dehydroxy:14.78                                                              | PEAKS PTM |
| K.ISM(+15.99)PVN(+.98)TPGQFEDFFPASSR.D                        | N    | 28.37  | 2243.0205 | 20     | 8.5  | 1122.5271 | 2 | 44.80 | 6        | F6:2368 | OB5956<br>H1<br>Ro.raw | 0                   | 0        | 0                       | 282   | 301 | Oxidation (M)                    | M3:Oxidation (M):1000.00;N6:Deamidation (NQ):0.00                                                          | PEAKS DB  |
| K.GTGNLE(+53.92)LVAVRK.E                                      | N    | 28.35  | 1309.6440 | 12     | -0.1 | 437.5553  | 3 | 27.29 | 4        | F4:1309 | OB5954<br>H1<br>Ro.raw | 2.3239E4            | 1        | 1                       | 453   | 464 | Replacement of 2 protons by iron | E6:Replacement of 2 protons by iron:60.54                                                                  | PEAKS PTM |
| D.NVIDQIEK.Q                                                  | N    | 28.35  | 957.5131  | 8      | 1.6  | 479.7646  | 2 | 28.19 | 5        | F5:1367 | OB5955<br>H1<br>Ro.raw | 2.9963E3            | 1        | 1                       | 544   | 551 |                                  |                                                                                                            | PEAKS DB  |
| K.I(+43.01)S(+14.02)MPVNTPGQFEDFFPASSR.D                      | N    | 28.31  | 2283.0630 | 20     | -0.7 | 1142.5380 | 2 | 36.01 | 6        | F6:1860 | OB5956<br>H1<br>Ro.raw | 2.4015E5            | 1        | 1                       | 282   | 301 | Carbamylation                    | I1:Carbamylation:1000.00;S2:Methylation (others):39.44                                                     | PEAKS PTM |
| R.VLLEENAGGEQEERGQRR.R                                        | N    | 28.30  | 2069.0249 | 18     | 1.0  | 518.2640  | 4 | 25.49 | 5        | F5:1205 | OB5955<br>H1<br>Ro.raw | 1.3378E5            | 1        | 1                       | 329   | 346 |                                  |                                                                                                            | PEAKS DB  |
| K.NP(+15.99)QLQDLDMMLTC(+57.02)VEIKEGALMLPHFNSK.A             | N    | 28.11  | 3387.6335 | 29     | 3.2  | 1130.2220 | 3 | 40.44 | 5        | F5:2090 | OB5955<br>H1<br>Ro.raw | 3.3176E4            | 1        | 1                       | 415   | 443 | Carbamidomethylation             | P2:Hydroxylation Pro:14.98;C13:Carbamidomethylation:1000.00                                                | PEAKS DB  |

total 287 peptides

| Peptide                                                | Uniq | -10lgP | Mass      | Length | ppm  | m/z       | z | RT    | Fraction | Scan    | Source File      | Area roasted peanut | #Feature | #Feature roasted peanut | Start | End | PTM                                          | AScore                                                                            | Found By  |
|--------------------------------------------------------|------|--------|-----------|--------|------|-----------|---|-------|----------|---------|------------------|---------------------|----------|-------------------------|-------|-----|----------------------------------------------|-----------------------------------------------------------------------------------|-----------|
| K.AMVVVVNK(-1.03)GTGNLELVAVR.K                         | N    | 27.94  | 2080.1714 | 20     | 8.5  | 1041.1018 | 2 | 34.56 | 4        | F4:1751 | OB5954 H1 Ro.raw | 2.9653E7            | 1        | 1                       | 444   | 463 | Lysine oxidation to aminoadipic semialdehyde | K9:Lysine oxidation to aminoadipic semialdehyde:1000.00                           | PEAKS PTM |
| K.SF(+17.99)NLDEGHAI.R.I                               | N    | 27.90  | 1275.6007 | 11     | 8.1  | 638.8128  | 2 | 26.62 | 5        | F5:1267 | OB5955 H1 Ro.raw | 9.5818E3            | 1        | 1                       | 249   | 259 | Fluorination                                 | F2:Fluorination:1000.00                                                           | PEAKS PTM |
| K.SFNLDEGHAI.RIP(+15.99)SGF(+17.99)ISYILNR.H           | N    | 27.40  | 2652.3459 | 23     | 8.7  | 885.1303  | 3 | 38.95 | 5        | F5:2010 | OB5955 H1 Ro.raw | 0                   | 0        | 0                       | 249   | 271 | Hydroxylation Pro                            | P13:Hydroxylation Pro:1000.00;F16:Fluorination:38.16                              | PEAKS PTM |
| R.VLLEENAGGEQEER(+15.99).G                             | N    | 27.33  | 1587.7375 | 14     | 1.8  | 794.8775  | 2 | 26.70 | 4        | F4:1275 | OB5954 H1 Ro.raw | 0                   | 0        | 0                       | 329   | 342 |                                              | R14:Oxidation or Hydroxylation:20.88                                              | PEAKS PTM |
| K.NPQLQ(+.98)DLDM(+15.99)LTC(+57.02)VEIKEGALMLPHFNSK.A | N    | 27.25  | 3388.6174 | 29     | 8.0  | 1130.5554 | 3 | 37.44 | 5        | F5:1884 | OB5955 H1 Ro.raw | 6.7537E6            | 1        | 1                       | 415   | 443 | Carbamidomethylation                         | Q5:Deamidation (NQ):0.00;M10:Oxidation (M):12.28;C13:Carbamidomethylation:1000.00 | PEAKS DB  |
| R.N(+42.01)(+15.00)NPFYFPSRR.F                         | N    | 27.12  | 1353.6465 | 10     | 9.4  | 677.8369  | 2 | 29.74 | 5        | F5:1453 | OB5955 H1 Ro.raw | 3.0438E5            | 1        | 1                       | 166   | 175 |                                              | N1:Acetylation (N-term):1000.00;N1:Deamidation followed by a methylation:12.28    | PEAKS PTM |
| R.VAK(-1.03)ISMPVNTPGQFEDFFPASSR.D                     | N    | 27.11  | 2523.2104 | 23     | 1.1  | 1262.6139 | 2 | 36.53 | 6        | F6:1887 | OB5956 H1 Ro.raw | 0                   | 0        | 0                       | 279   | 301 | Lysine oxidation to aminoadipic semialdehyde | K3:Lysine oxidation to aminoadipic semialdehyde:1000.00                           | PEAKS PTM |
| K.NPQLQDLDMMLTC(+58.01)VEIK.E                          | N    | 26.84  | 2047.9629 | 17     | -3.6 | 1024.9850 | 2 | 46.58 | 4        | F4:2449 | OB5954 H1 Ro.raw | 0                   | 0        | 0                       | 415   | 431 | Carboxymethyl                                | C13:Carboxymethyl:1000.00                                                         | PEAKS PTM |
| R.EQEW(+15.99)EEEEEEEEEGSNREVR.R                       | N    | 26.79  | 2681.0483 | 21     | 1.1  | 894.6910  | 3 | 26.92 | 4        | F4:1316 | OB5954 H1 Ro.raw | 7.9753E4            | 1        | 1                       | 473   | 493 | Oxidation (HW)                               | W4:Oxidation (HW):1000.00                                                         | PEAKS PTM |

total 287 peptides

| Peptide                                                                 | Uniq | -10lgP | Mass      | Length | ppm  | m/z       | z | RT    | Fraction | Scan    | Source File            | Area roasted peanut | #Feature | #Feature roasted peanut | Start | End | PTM                                    | AScore                                                                                                                                  | Found By  |
|-------------------------------------------------------------------------|------|--------|-----------|--------|------|-----------|---|-------|----------|---------|------------------------|---------------------|----------|-------------------------|-------|-----|----------------------------------------|-----------------------------------------------------------------------------------------------------------------------------------------|-----------|
| K.NPQLQLDMM(+15.99)LTC(+57.02)VEIKEGALMLP(+15.99)HFNSK.A                | N    | 26.70  | 3403.6284 | 29     | -6.6 | 1702.8102 | 2 | 36.88 | 6        | F6:1908 | OB5956<br>H1<br>Ro.raw | 0                   | 0        | 0                       | 415   | 443 | Carbamidomethylation                   | M10:Oxidation (M):7.65;C13:Carbamidomethylation:1000.00;P24:Hydroxylation Pro:30.14                                                     | PEAKS DB  |
| R.IFLAGDKD(-18.01)NV.I                                                  | N    | 26.68  | 1072.5553 | 10     | 0.4  | 537.2852  | 2 | 32.21 | 4        | F4:1610 | OB5954<br>H1<br>Ro.raw | 2.1773E6            | 1        | 1                       | 536   | 545 |                                        | D8:Dehydration:45.01                                                                                                                    | PEAKS PTM |
| K.KNPQLQLDMM(-48.00)LTC(+57.02)VEIK.E                                   | N    | 26.57  | 2127.0703 | 18     | -0.4 | 710.0304  | 3 | 31.57 | 6        | F6:1598 | OB5956<br>H1<br>Ro.raw | 1.2455E5            | 1        | 1                       | 414   | 431 | Carbamidomethylation                   | M11:Dehydration:0.00;C14:Carbamidomethylation:1000.00                                                                                   | PEAKS PTM |
| K.KNPQ(+.98)LQ(+.98)DLDM(+15.99)MLTC(+57.02)VEIKEGALM(+15.99)LPHFNSK.A  | N    | 26.17  | 3533.6914 | 30     | 9.7  | 884.4387  | 4 | 35.77 | 5        | F5:1822 | OB5955<br>H1<br>Ro.raw | 2.4464E5            | 1        | 1                       | 414   | 443 | Carbamidomethylation                   | Q4:Deamidation (NQ):9.40;Q6:Deamidation (NQ):6.65;M10:Oxidation (M):0.00;C14:Carbamidomethylation:1000.00;M23:Oxidation (M):40.04       | PEAKS DB  |
| K.NPQLQ(+.98)DLDM(+15.99)M(+15.99)LTC(+57.02)VEIKEGALM(+15.99)LPHFNSK.A | N    | 26.02  | 3420.6074 | 29     | 5.5  | 1141.2161 | 3 | 34.83 | 5        | F5:1769 | OB5955<br>H1<br>Ro.raw | 2.4925E5            | 1        | 1                       | 415   | 443 | Oxidation (M);<br>Carbamidomethylation | Q5:Deamidation (NQ):11.12;M9:Oxidation (M):1000.00;M10:Oxidation (M):1000.00;C13:Carbamidomethylation:1000.00;M22:Oxidation (M):1000.00 | PEAKS DB  |
| K.AM(-48.00)VIVVVNK.G                                                   | N    | 25.96  | 923.5804  | 9      | 0.0  | 462.7975  | 2 | 25.00 | 6        | F6:1192 | OB5956<br>H1<br>Ro.raw | 6.3039E3            | 1        | 1                       | 444   | 452 | Dethiomethyl                           | M2:Dehydration:1000.00                                                                                                                  | PEAKS PTM |

total 287 peptides



| Peptide                                                           | Uniq | -10lgP | Mass      | Length | ppm | m/z       | z | RT    | Fraction | Scan    | Source File      | Area roasted peanut | #Feature | #Feature roasted peanut | Start | End | PTM | AScore                                                                           | Found By  |
|-------------------------------------------------------------------|------|--------|-----------|--------|-----|-----------|---|-------|----------|---------|------------------|---------------------|----------|-------------------------|-------|-----|-----|----------------------------------------------------------------------------------|-----------|
| R.IVQIEARPNTLVLP(+15.99)KHADADNILVIQGGQ(+.98)ATVTVAN(+.98)GNNRK.S | Y    | 25.90  | 4436.3774 | 41     | 6.0 | 1110.1083 | 4 | 32.89 | 4        | F4:1658 | OB5954 H1 Ro.raw | 3.5945E5            | 1        | 1                       | 208   | 248 |     | P14:Hydroxylation Pro:1.99; Q29:Deamidation (NQ):0.00;N36:Deamidation (NQ):14.04 | PEAKS DB  |
| R.SSDNEGVIVKVSKEHVQELTK.H                                         | N    | 25.71  | 2325.2175 | 21     | 0.9 | 776.0804  | 3 | 28.86 | 4        | F4:1404 | OB5954 H1 Ro.raw | 0                   | 0        | 0                       | 351   | 371 |     |                                                                                  | PEAKS DB  |
| R.DQSSY(+15.99)LQGF.SR.N                                          | N    | 25.52  | 1302.5840 | 11     | 1.6 | 652.3003  | 2 | 29.24 | 6        | F6:1470 | OB5956 H1 Ro.raw | 7.3464E4            | 1        | 1                       | 302   | 312 |     | Y5:Oxidation or Hydroxylation:26.36                                              | PEAKS PTM |
| total 287 peptides                                                |      |        |           |        |     |           |   |       |          |         |                  |                     |          |                         |       |     |     |                                                                                  |           |

tr|E5G076|E5G076\_ARAHY

back to list

| Protein Coverage | Supporting Peptides |

Protein Coverage:

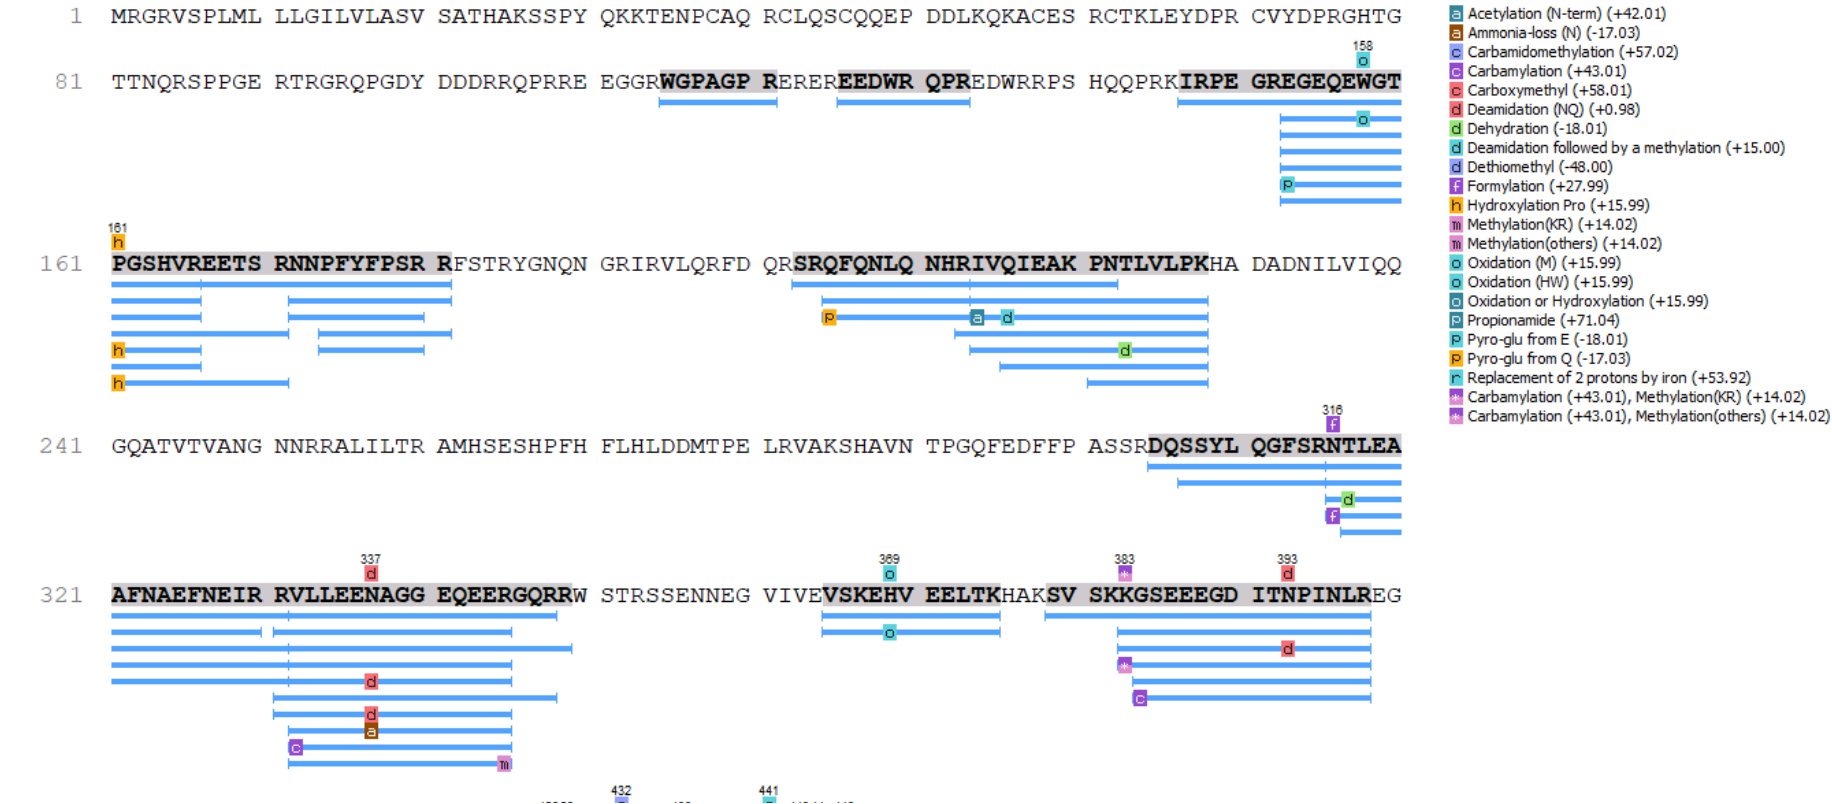

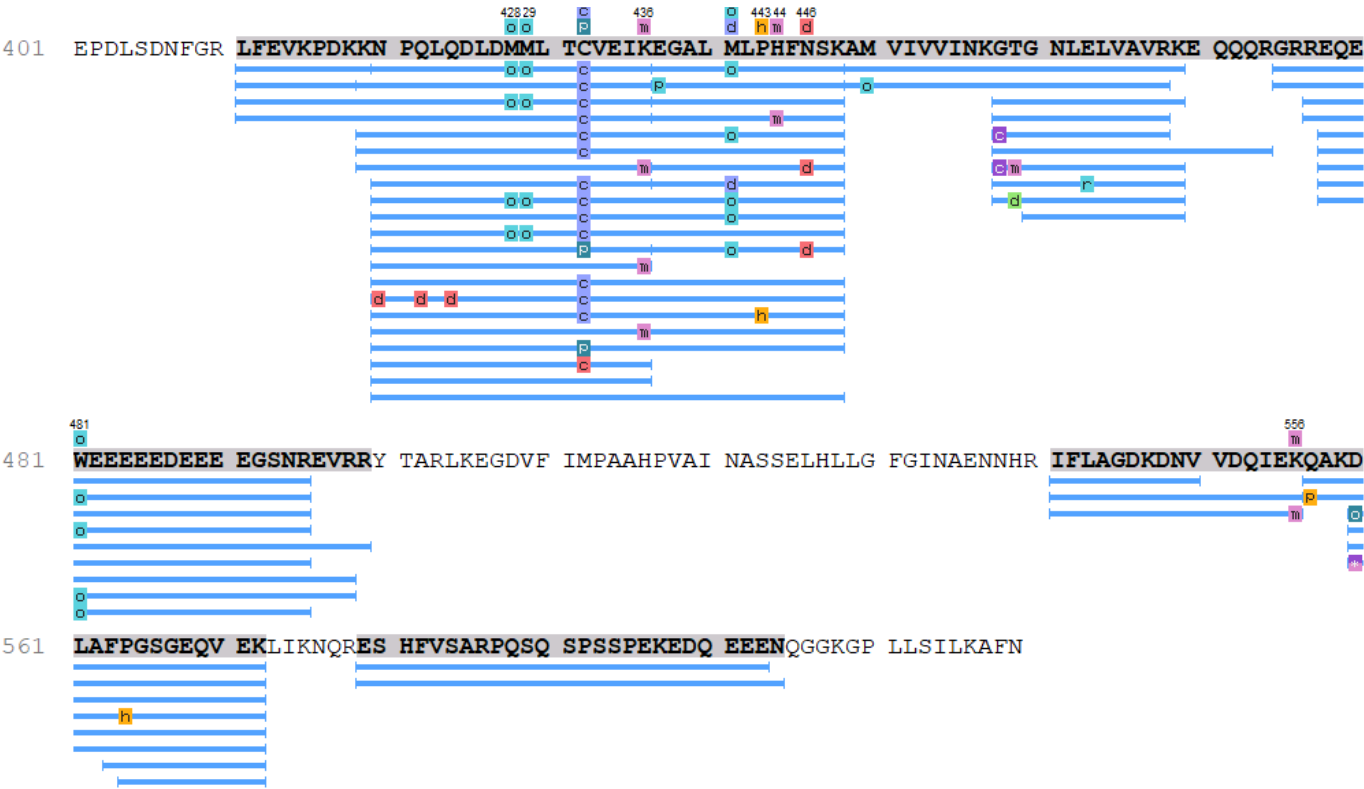

Supporting Peptides:

| Peptide                               | Uniq | -10lgP | Mass      | Length | ppm  | m/z       | z | RT    | Fraction | Scan    | Source File      | Area roasted peanut | #Feature | #Feature roasted peanut | Start | End | PTM                  | AScore                                                  | Found By |
|---------------------------------------|------|--------|-----------|--------|------|-----------|---|-------|----------|---------|------------------|---------------------|----------|-------------------------|-------|-----|----------------------|---------------------------------------------------------|----------|
| R.EQWEEEEEEEEEGSNR.E                  | N    | 117.09 | 2280.8413 | 18     | 3.3  | 1141.4316 | 2 | 28.28 | 5        | F5:1371 | OB5955 H1 Ro.raw | 4.6914E6            | 7        | 7                       | 478   | 495 |                      |                                                         | PEAKS DB |
| K.KNPQLQDLDMMLTC(+57.02)VEIK.E        | N    | 116.47 | 2175.0737 | 18     | 3.2  | 1088.5476 | 2 | 35.21 | 5        | F5:1788 | OB5955 H1 Ro.raw | 1.5503E7            | 6        | 6                       | 419   | 436 | Carbamidomethylation | C14:Carbamidomethylation:1000.00                        | PEAKS DB |
| K.NPQLQDLDM(+15.99)LTC(+57.02)VEIK.E  | N    | 116.10 | 2062.9736 | 17     | 5.0  | 1032.4993 | 2 | 34.71 | 6        | F6:1780 | OB5956 H1 Ro.raw | 1.155E7             | 4        | 4                       | 420   | 436 | Carbamidomethylation | M10:Oxidation(M):30.46;C13:Carbamidomethylation:1000.00 | PEAKS DB |
| K.NPQLQDLDM(+15.99)MLTC(+57.02)VEIK.E | N    | 115.70 | 2062.9736 | 17     | -4.7 | 1032.4893 | 2 | 36.62 | 4        | F4:1873 | OB5954 H1 Ro.raw | 3.8486E6            | 3        | 3                       | 420   | 436 | Carbamidomethylation | M9:Oxidation(M):30.46;C13:Carbamidomethylation:1000.00  | PEAKS DB |
| total 184 peptides                    |      |        |           |        |      |           |   |       |          |         |                  |                     |          |                         |       |     |                      |                                                         |          |

| Peptide                                       | Uniq | -10lgP | Mass      | Length | ppm  | m/z       | z | RT    | Fraction | Scan    | Source File      | Area roasted peanut | #Feature | #Feature roasted peanut | Start | End | PTM                                 | AScore                                                                              | Found By  |
|-----------------------------------------------|------|--------|-----------|--------|------|-----------|---|-------|----------|---------|------------------|---------------------|----------|-------------------------|-------|-----|-------------------------------------|-------------------------------------------------------------------------------------|-----------|
| K.NPQLQDLDMMLTC(+57.02)VEIK.E                 | N    | 112.86 | 2046.9788 | 17     | 0.2  | 1024.4968 | 2 | 37.11 | 6        | F6:1959 | OB5956 H1 Ro.raw | 3.5075E7            | 10       | 10                      | 420   | 436 | Carbamidomethylation                | C13:Carbamidomethylation:1000.00                                                    | PEAKS DB  |
| R.NTLEAAFNAEFNEIR.R                           | N    | 112.69 | 1737.8322 | 15     | 1.4  | 869.9246  | 2 | 35.64 | 6        | F6:1825 | OB5956 H1 Ro.raw | 1.2023E7            | 6        | 6                       | 316   | 330 |                                     |                                                                                     | PEAKS DB  |
| K.KGSEEEGDITNPINLR.E                          | N    | 105.71 | 1770.8748 | 16     | 0.6  | 886.4452  | 2 | 28.91 | 6        | F6:1429 | OB5956 H1 Ro.raw | 3.1807E7            | 6        | 6                       | 383   | 398 |                                     |                                                                                     | PEAKS DB  |
| K.KNPQLQDLDM(+15.99)MLTC(+57.02)VEIK.E        | N    | 103.13 | 2191.0686 | 18     | 3.6  | 1096.5455 | 2 | 34.71 | 6        | F6:1781 | OB5956 H1 Ro.raw | 1.4412E6            | 4        | 4                       | 419   | 436 | Carbamidomethylation                | M10:Oxidation(M):27.96;C14:Carbamidomethylation:1000.00                             | PEAKS DB  |
| K.NPQLQDLDM(+15.99)M(+15.99)LTC(+57.02)VEIK.E | N    | 96.89  | 2078.9688 | 17     | 6.6  | 1040.4985 | 2 | 33.82 | 6        | F6:1726 | OB5956 H1 Ro.raw | 7.6578E4            | 2        | 2                       | 420   | 436 | Oxidation (M); Carbamidomethylation | M9:Oxidation(M):1000.00; M10:Oxidation(M):1000.00; C13:Carbamidomethylation:1000.00 | PEAKS DB  |
| R.EGEQEWGTPGSHVR.E                            | N    | 95.59  | 1567.7015 | 14     | 2.9  | 784.8604  | 2 | 25.79 | 4        | F4:1223 | OB5954 H1 Ro.raw | 3.5597E6            | 6        | 6                       | 153   | 166 |                                     |                                                                                     | PEAKS DB  |
| R.VLLEENAGGEQEER.G                            | N    | 95.38  | 1571.7427 | 14     | 2.2  | 786.8804  | 2 | 26.92 | 4        | F4:1300 | OB5954 H1 Ro.raw | 3.043E7             | 6        | 6                       | 332   | 345 |                                     |                                                                                     | PEAKS DB  |
| K.KNPQLQDLDMM(+15.99)LTC(+57.02)VEIK.E        | N    | 95.29  | 2191.0686 | 18     | 3.1  | 1096.5449 | 2 | 32.98 | 5        | F5:1657 | OB5955 H1 Ro.raw | 1.9358E6            | 4        | 4                       | 419   | 436 | Carbamidomethylation                | M11:Oxidation(M):23.10;C14:Carbamidomethylation:1000.00                             | PEAKS DB  |
| R.DQSSYLQGFSR.N                               | N    | 94.26  | 1286.5891 | 11     | -0.9 | 644.3013  | 2 | 30.91 | 4        | F4:1531 | OB5954 H1 Ro.raw | 9.6573E7            | 19       | 19                      | 305   | 315 |                                     |                                                                                     | PEAKS DB  |
| K.GSEEEGDITNPINLR.E                           | N    | 94.26  | 1642.7798 | 15     | -1.1 | 822.3963  | 2 | 30.91 | 4        | F4:1555 | OB5954 H1 Ro.raw | 1.1859E7            | 3        | 3                       | 384   | 398 |                                     |                                                                                     | PEAKS DB  |
| R.RVLEENAGGEQEER.G                            | N    | 93.77  | 1727.8438 | 15     | 0.2  | 576.9553  | 3 | 25.30 | 5        | F5:1185 | OB5955 H1 Ro.raw | 8.7628E5            | 6        | 6                       | 331   | 345 |                                     |                                                                                     | PEAKS DB  |
| K.NPQLQDLDMMLTC(+14.02)VEIK.E                 | N    | 93.65  | 2003.9730 | 17     | 2.7  | 1002.9965 | 2 | 38.33 | 5        | F5:1965 | OB5955 H1 Ro.raw | 5.8314E6            | 4        | 4                       | 420   | 436 |                                     | C13:Methylation(others):33.98                                                       | PEAKS PTM |
| R.REQEWEEEEEEEEGSNR.E                         | N    | 88.08  | 2436.9424 | 19     | 0.6  | 813.3219  | 3 | 26.73 | 4        | F4:1278 | OB5954 H1 Ro.raw | 9.3919E5            | 7        | 7                       | 477   | 495 |                                     |                                                                                     | PEAKS DB  |

total 184 peptides

| Peptide                                           | Uniq | -10lgP | Mass      | Length | ppm  | m/z       | z | RT    | Fraction | Scan    | Source File      | Area roasted peanut | #Feature | #Feature roasted peanut | Start | End | PTM                  | AScore                                                  | Found By  |
|---------------------------------------------------|------|--------|-----------|--------|------|-----------|---|-------|----------|---------|------------------|---------------------|----------|-------------------------|-------|-----|----------------------|---------------------------------------------------------|-----------|
| R.EQEW(+15.99)EEEEEEEEEGSNR.E                     | N    | 86.71  | 2296.8362 | 18     | 2.5  | 1149.4282 | 2 | 27.64 | 6        | F6:1309 | OB5956 H1 Ro.raw | 1.0675E6            | 3        | 3                       | 478   | 495 | Oxidation (HW)       | W4:Oxidation (HW):1000.00                               | PEAKS PTM |
| K.NPQLQDLDM(+15.99)MLTCVEIK(+14.02).E             | N    | 85.42  | 2019.9679 | 17     | 2.2  | 1010.9934 | 2 | 37.33 | 4        | F4:1920 | OB5954 H1 Ro.raw | 7.9299E5            | 2        | 2                       | 420   | 436 | Methylation(KR)      | M9:Oxidation (M):21.94;K17:Methylation (KR):1000.00     | PEAKS PTM |
| K.DLAFPGSGEQVEK.L                                 | N    | 85.27  | 1375.6619 | 13     | -0.7 | 688.8377  | 2 | 30.39 | 4        | F4:1498 | OB5954 H1 Ro.raw | 9.2216E7            | 3        | 3                       | 560   | 572 |                      |                                                         | PEAKS DB  |
| R.VLLEEN(+.98)AGGEQEER.G                          | N    | 85.22  | 1572.7267 | 14     | 2.8  | 787.3728  | 2 | 27.46 | 6        | F6:1340 | OB5956 H1 Ro.raw | 6.8644E5            | 3        | 3                       | 332   | 345 | Deamidation (NQ)     | N6:Deamidation (NQ):121.37                              | PEAKS DB  |
| K.NPQLQDLDMMLTC(+57.02)VEIKEGALMLPHFNSK.A         | N    | 85.17  | 3371.6387 | 29     | -4.9 | 1686.8184 | 2 | 38.00 | 5        | F5:1955 | OB5955 H1 Ro.raw | 1.5541E8            | 10       | 10                      | 420   | 448 | Carbamidomethylation | C13:Carbamidomethylation:1000.00                        | PEAKS DB  |
| K.NPQLQDLDM(+15.99)MLTC(+57.02)VEIKEGALMLPHFNSK.A | N    | 83.17  | 3387.6335 | 29     | -0.6 | 1130.2178 | 3 | 37.70 | 4        | F4:1939 | OB5954 H1 Ro.raw | 9.055E7             | 6        | 6                       | 420   | 448 | Carbamidomethylation | M9:Oxidation (M):26.02;C13:Carbamidomethylation:1000.00 | PEAKS DB  |
| R.NTLEAAFNAAFNEIRR.V                              | N    | 81.08  | 1893.9332 | 16     | -2.6 | 947.9714  | 2 | 34.11 | 5        | F5:1711 | OB5955 H1 Ro.raw | 2.8495E8            | 15       | 15                      | 316   | 331 |                      |                                                         | PEAKS DB  |
| R.GRREQEWEEEEEEEEEGSNR.E                          | N    | 80.86  | 2650.0649 | 21     | 1.1  | 884.3632  | 3 | 26.73 | 4        | F4:1280 | OB5954 H1 Ro.raw | 8.7144E5            | 6        | 6                       | 475   | 495 |                      |                                                         | PEAKS DB  |
| K.EGALMLPHFNSK.A                                  | N    | 80.31  | 1342.6703 | 12     | 2.3  | 672.3440  | 2 | 30.63 | 5        | F5:1504 | OB5955 H1 Ro.raw | 1.4317E7            | 5        | 5                       | 437   | 448 |                      |                                                         | PEAKS DB  |
| R.LFEVKPDKKNPQLQDLDMMLTC(+57.02)VEIK.E            | N    | 78.90  | 3131.6069 | 26     | -4.0 | 1044.8721 | 3 | 34.65 | 5        | F5:1756 | OB5955 H1 Ro.raw | 5.2558E6            | 4        | 4                       | 411   | 436 | Carbamidomethylation | C22:Carbamidomethylation:1000.00                        | PEAKS DB  |
| K.NPQLQDLDMM(-48.00)LTC(+57.02)VEIK.E             | N    | 76.61  | 1998.9755 | 17     | 1.9  | 1000.4969 | 2 | 32.85 | 6        | F6:1670 | OB5956 H1 Ro.raw | 6.204E6             | 3        | 3                       | 420   | 436 | Carbamidomethylation | M10:Deamidation:14.02;C13:Carbamidomethylation:1000.00  | PEAKS PTM |
| R.IVQIEAKPNTLVLPK.H                               | N    | 75.36  | 1662.0079 | 15     | -1.3 | 832.0101  | 2 | 30.39 | 4        | F4:1488 | OB5954 H1 Ro.raw | 2.8512E7            | 17       | 17                      | 214   | 228 |                      |                                                         | PEAKS DB  |
| K.EGALMLPHFN(+.98)SK.A                            | N    | 75.32  | 1343.6543 | 12     | 2.6  | 672.8362  | 2 | 31.66 | 6        | F6:1595 | OB5956 H1 Ro.raw | 1.7726E5            | 2        | 2                       | 437   | 448 | Deamidation (NQ)     | N10:Deamidation (NQ):1000.00                            | PEAKS DB  |

total 184 peptides

| Peptide                                                   | Uniq | -10lgP | Mass      | Length | ppm  | m/z       | z | RT    | Fraction | Scan    | Source File      | Area roasted peanut | #Feature | #Feature roasted peanut | Start | End | PTM                                 | AScore                                                                            | Found By  |
|-----------------------------------------------------------|------|--------|-----------|--------|------|-----------|---|-------|----------|---------|------------------|---------------------|----------|-------------------------|-------|-----|-------------------------------------|-----------------------------------------------------------------------------------|-----------|
| K.KNPQLQDLDMMLTC(+57.02)VEIKEGALMLPHFNSK.A                | N    | 74.64  | 3499.7336 | 30     | -3.9 | 875.9373  | 4 | 36.80 | 4        | F4:1884 | OB5954 H1 Ro.raw | 6.9756E6            | 4        | 4                       | 419   | 448 | Carbamidomethylation                | C14:Carbamidomethylation:1000.00                                                  | PEAKS DB  |
| R.NTLEAAFN(+.98)AEFNEIRR.V                                | N    | 74.52  | 1894.9172 | 16     | -2.2 | 948.4638  | 2 | 32.35 | 4        | F4:1616 | OB5954 H1 Ro.raw | 1.3754E6            | 3        | 3                       | 316   | 331 |                                     | N8:Deamidation (NQ):48.12                                                         | PEAKS DB  |
| R.EETSRN(+.98)NPFYFSPRR.F                                 | N    | 73.61  | 1899.8864 | 15     | -0.2 | 634.3026  | 3 | 28.39 | 4        | F4:1381 | OB5954 H1 Ro.raw | 5.4651E5            | 3        | 3                       | 167   | 181 |                                     | N6:Deamidation (NQ):33.98                                                         | PEAKS DB  |
| R.RVLLEENAGGEQEERGQR.R                                    | N    | 73.30  | 2069.0249 | 18     | 1.9  | 690.6835  | 3 | 25.60 | 4        | F4:1205 | OB5954 H1 Ro.raw | 1.8274E6            | 3        | 3                       | 331   | 348 |                                     |                                                                                   | PEAKS DB  |
| K.GTGNLELVAVR.K                                           | N    | 72.98  | 1127.6299 | 11     | -1.3 | 564.8215  | 2 | 30.21 | 4        | F4:1476 | OB5954 H1 Ro.raw | 2.4766E7            | 4        | 4                       | 458   | 468 |                                     |                                                                                   | PEAKS DB  |
| K.EGALM(+15.99)LPHFNSK.A                                  | N    | 72.82  | 1358.6653 | 12     | -0.5 | 680.3396  | 2 | 30.10 | 5        | F5:1469 | OB5955 H1 Ro.raw | 3.1504E6            | 5        | 5                       | 437   | 448 | Oxidation (M)                       | M5:Oxidation (M):1000.00                                                          | PEAKS DB  |
| K.GTGNLELVAVRK.E                                          | N    | 70.92  | 1255.7249 | 12     | 0.7  | 628.8701  | 2 | 27.30 | 4        | F4:1290 | OB5954 H1 Ro.raw | 2.2945E7            | 7        | 7                       | 458   | 469 |                                     |                                                                                   | PEAKS DB  |
| K.KNPQLQDLDMMLTC(+57.02)VEIKEGALM(+15.99)LPHFNSK.A        | N    | 70.54  | 3515.7285 | 30     | -1.9 | 879.9377  | 4 | 36.03 | 6        | F6:1857 | OB5956 H1 Ro.raw | 6.9145E6            | 3        | 3                       | 419   | 448 | Carbamidomethylation; Oxidation (M) | C14:Carbamidomethylation:1000.00; M23:Oxidation (M):107.40                        | PEAKS DB  |
| K.NPQLQDLDM(+15.99)MLTC(+57.02)VEIKEGALM(+15.99)LPHFNSK.A | N    | 70.15  | 3403.6284 | 29     | 1.1  | 851.9153  | 4 | 37.51 | 4        | F4:1883 | OB5954 H1 Ro.raw | 7.9309E6            | 6        | 6                       | 420   | 448 | Carbamidomethylation; Oxidation (M) | M9:Oxidation (M):27.96; C13:Carbamidomethylation:1000.00; M22:Oxidation (M):71.31 | PEAKS DB  |
| R.EGEQEWGTP(+15.99)GSHVR.E                                | N    | 69.74  | 1583.6964 | 14     | 0.8  | 792.8561  | 2 | 27.64 | 6        | F6:1358 | OB5956 H1 Ro.raw | 1.3284E5            | 4        | 4                       | 153   | 166 | Hydroxylation Pro                   | P9:Hydroxylation Pro:1000.00                                                      | PEAKS DB  |
| R.VLLEENAGGEQEERGQR.R                                     | N    | 69.54  | 1912.9238 | 17     | 0.6  | 957.4698  | 2 | 25.30 | 5        | F5:1191 | OB5955 H1 Ro.raw | 3.4466E6            | 6        | 6                       | 332   | 348 |                                     |                                                                                   | PEAKS DB  |
| R.DQS(-18.01)SYLQGFSR.N                                   | N    | 68.93  | 1268.5785 | 11     | 0.2  | 635.2966  | 2 | 30.91 | 4        | F4:1537 | OB5954 H1 Ro.raw | 6.7379E5            | 3        | 3                       | 305   | 315 |                                     | S3:Dehydration:40.00                                                              | PEAKS PTM |
| K.NPQLQDLDMM(+15.99)LTC(+57.02)VEIKEGALMLPHFNSK.A         | N    | 68.62  | 3387.6335 | 29     | -0.8 | 1130.2175 | 3 | 36.42 | 4        | F4:1862 | OB5954 H1 Ro.raw | 7.1368E7            | 6        | 6                       | 420   | 448 | Carbamidomethylation                | M10:Oxidation (M):24.44; C13:Carbamidomethylation:1000.00                         | PEAKS DB  |

total 184 peptides

| Peptide                                                   | Uniq | -10lgP | Mass      | Length | ppm  | m/z       | z | RT    | Fraction | Scan    | Source File      | Area roasted peanut | #Feature | #Feature roasted peanut | Start | End | PTM                                 | AScore                                                                               | Found By  |
|-----------------------------------------------------------|------|--------|-----------|--------|------|-----------|---|-------|----------|---------|------------------|---------------------|----------|-------------------------|-------|-----|-------------------------------------|--------------------------------------------------------------------------------------|-----------|
| R.RVLLEEN(+.98)AGGEQEER.G                                 | N    | 68.51  | 1728.8278 | 15     | -0.8 | 577.2827  | 3 | 25.96 | 5        | F5:1233 | OB5955 H1 Ro.raw | 1.3591E4            | 2        | 2                       | 331   | 345 | Deamidation (NQ)                    | N7:Deamidation (NQ): 77.53                                                           | PEAKS DB  |
| R.NNPFYFSPSR.R                                            | N    | 68.49  | 1140.5352 | 9      | 0.9  | 571.2754  | 2 | 31.81 | 4        | F4:1575 | OB5954 H1 Ro.raw | 1.7544E7            | 5        | 5                       | 172   | 180 |                                     |                                                                                      | PEAKS DB  |
| K.NPQLQLDMLMTCVEIK(+14.02)EGALMLPHFNSK.A                  | N    | 68.29  | 3328.6328 | 29     | 0.9  | 833.1663  | 4 | 38.52 | 5        | F5:1986 | OB5955 H1 Ro.raw | 1.7448E7            | 6        | 6                       | 420   | 448 | Methylation(KR)                     | K17:Methylation(KR): 98.15                                                           | PEAKS PTM |
| R.EGEQEWGTPGSHVRETSR.N                                    | N    | 67.84  | 2169.9675 | 19     | 2.2  | 724.3314  | 3 | 26.51 | 6        | F6:1287 | OB5956 H1 Ro.raw | 5.9384E5            | 3        | 3                       | 153   | 171 |                                     |                                                                                      | PEAKS DB  |
| R.NNPFYFSPRR.F                                            | N    | 67.62  | 1296.6364 | 10     | 0.0  | 649.3254  | 2 | 28.95 | 4        | F4:1567 | OB5954 H1 Ro.raw | 1.3432E8            | 8        | 8                       | 172   | 181 |                                     |                                                                                      | PEAKS DB  |
| R.EETSRNNPFYFSPRR.F                                       | N    | 67.58  | 1898.9023 | 15     | 1.8  | 633.9759  | 3 | 27.75 | 5        | F5:1339 | OB5955 H1 Ro.raw | 9.3426E5            | 3        | 3                       | 167   | 181 |                                     |                                                                                      | PEAKS DB  |
| K.KNPQLQLDMLMTCVEIK(+14.02).E                             | N    | 66.83  | 2132.0679 | 18     | -0.6 | 1067.0405 | 2 | 36.31 | 4        | F4:1858 | OB5954 H1 Ro.raw | 6.1629E5            | 2        | 2                       | 419   | 436 | Methylation(KR)                     | K18:Methylation(KR): 130.57                                                          | PEAKS PTM |
| E.VSKEHVEELTK.H                                           | N    | 66.65  | 1297.6877 | 11     | -0.3 | 649.8510  | 2 | 24.21 | 4        | F4:1125 | OB5954 H1 Ro.raw | 2.2976E5            | 5        | 5                       | 365   | 375 |                                     |                                                                                      | PEAKS DB  |
| R.VLLEEN(-17.03)AGGEQEER.G                                | N    | 65.50  | 1554.7162 | 14     | 1.2  | 778.3663  | 2 | 27.73 | 5        | F5:1335 | OB5955 H1 Ro.raw | 0                   | 0        | 0                       | 332   | 345 | Ammonia-loss (N)                    | N6:Ammonia-loss (N): 1000.00                                                         | PEAKS PTM |
| K.Q(-17.03)AKDLAFPGSGEQVEK.L                              | N    | 65.43  | 1685.8260 | 16     | 0.1  | 843.9204  | 2 | 29.98 | 6        | F6:1503 | OB5956 H1 Ro.raw | 1.0547E5            | 3        | 3                       | 557   | 572 | Pyro-glu from Q                     | Q1:Pyro-glu from Q: 1000.00                                                          | PEAKS PTM |
| K.NPQLQLDLM(+15.99)M(+15.99)LTC(+57.02)VEIKEGALMLPHFNSK.A | N    | 64.96  | 3403.6284 | 29     | -3.9 | 1135.5457 | 3 | 35.83 | 6        | F6:1849 | OB5956 H1 Ro.raw | 8.47E6              | 5        | 5                       | 420   | 448 | Oxidation (M); Carbamidomethylation | M9:Oxidation (M): 54.18; M10:Oxidation (M): 63.99; C13:Carbamidomethylation: 1000.00 | PEAKS DB  |
| R.VLLEENAGGEQEER(+14.02).G                                | N    | 64.84  | 1585.7583 | 14     | 0.7  | 793.8870  | 2 | 27.86 | 4        | F4:1339 | OB5954 H1 Ro.raw | 1.7453E5            | 3        | 3                       | 332   | 345 | Methylation(KR)                     | R14:Methylation(KR): 1000.00                                                         | PEAKS PTM |
| K.SVSKKGSEEEGDITNPINLR.E                                  | N    | 63.28  | 2172.1023 | 20     | 0.9  | 725.0420  | 3 | 27.48 | 4        | F4:1325 | OB5954 H1 Ro.raw | 1.9445E5            | 2        | 2                       | 379   | 398 |                                     |                                                                                      | PEAKS DB  |
| K.DLAFP(+15.99)GSGEQVEK.L                                 | N    | 62.87  | 1391.6569 | 13     | 0.4  | 696.8360  | 2 | 29.40 | 5        | F5:1432 | OB5955 H1 Ro.raw | 8.022E5             | 3        | 3                       | 560   | 572 | Hydroxylation Pro                   | P5:Hydroxylation Pro: 1000.00                                                        | PEAKS DB  |

total 184 peptides

| Peptide                                                    | Uniq | -10lgP | Mass      | Length | ppm  | m/z       | z | RT    | Fraction | Scan    | Source File      | Area roasted peanut | #Feature | #Feature roasted peanut | Start | End | PTM                                 | AScore                                                                              | Found By  |
|------------------------------------------------------------|------|--------|-----------|--------|------|-----------|---|-------|----------|---------|------------------|---------------------|----------|-------------------------|-------|-----|-------------------------------------|-------------------------------------------------------------------------------------|-----------|
| K.NPQLQLDMLTLC(+57.02)VEIKEGALM(+15.99)LPHFNSK.A           | N    | 62.74  | 3387.6335 | 29     | -1.0 | 1130.2173 | 3 | 37.10 | 5        | F5:1900 | OB5955 H1 Ro.raw | 9.055E7             | 6        | 6                       | 420   | 448 | Carbamidomethylation; Oxidation (M) | C13:Carbamidomethylation:1000.00; M22:Oxidation (M):82.05                           | PEAKS DB  |
| K.QAKDLAFPGSGEQVEK.L                                       | N    | 61.87  | 1702.8525 | 16     | 1.2  | 568.6255  | 3 | 27.08 | 6        | F6:1321 | OB5956 H1 Ro.raw | 2.8725E5            | 6        | 6                       | 557   | 572 |                                     |                                                                                     | PEAKS DB  |
| R.E(-18.01)GEQEWGTPGSHVR.E                                 | N    | 60.61  | 1549.6909 | 14     | 0.7  | 775.8533  | 2 | 27.75 | 5        | F5:1342 | OB5955 H1 Ro.raw | 4.4086E5            | 4        | 4                       | 153   | 166 | Pyro-glu from E                     | E1:Pyro-glu from E:1000.00                                                          | PEAKS PTM |
| Q.SSYLQGFSR.N                                              | N    | 60.35  | 1043.5035 | 9      | 0.6  | 522.7593  | 2 | 29.24 | 6        | F6:1453 | OB5956 H1 Ro.raw | 6.7195E4            | 3        | 3                       | 307   | 315 |                                     |                                                                                     | PEAKS DB  |
| K.NPQLQLDMM(+15.99)LTC(+57.02)VEIKEGALM(+15.99)LPHFNSK.A   | N    | 60.02  | 3403.6284 | 29     | -8.2 | 1135.5408 | 3 | 36.74 | 5        | F5:1878 | OB5955 H1 Ro.raw | 6.6522E6            | 6        | 6                       | 420   | 448 | Carbamidomethylation; Oxidation (M) | M10:Oxidation (M):21.94; C13:Carbamidomethylation:1000.00; M22:Oxidation (M):61.26  | PEAKS DB  |
| R.QFQNLQNHR.I                                              | N    | 59.95  | 1183.5846 | 9      | 0.0  | 592.7996  | 2 | 23.81 | 5        | F5:1102 | OB5955 H1 Ro.raw | 1.3905E5            | 5        | 5                       | 205   | 213 |                                     |                                                                                     | PEAKS DB  |
| R.Q(-17.03)FQNLQNHR.I                                      | N    | 59.90  | 1166.5581 | 9      | 3.5  | 584.2884  | 2 | 28.04 | 4        | F4:1346 | OB5954 H1 Ro.raw | 5.0983E6            | 3        | 3                       | 205   | 213 | Pyro-glu from Q                     | Q1:Pyro-glu from Q:1000.00                                                          | PEAKS PTM |
| K.KNPQLQLDMM(+15.99)MLTC(+57.02)VEIKEGALM(+15.99)LPHFNSK.A | N    | 59.67  | 3531.7234 | 30     | -1.9 | 883.9364  | 4 | 35.86 | 4        | F4:1821 | OB5954 H1 Ro.raw | 2.0004E6            | 3        | 3                       | 419   | 448 | Carbamidomethylation; Oxidation (M) | M10:Oxidation (M):17.01; C14:Carbamidomethylation:1000.00; M23:Oxidation (M):101.58 | PEAKS DB  |
| K.NPQLQ(+.98)DLDMMLTLC(+57.02)VEIK.E                       | N    | 59.63  | 2047.9629 | 17     | 1.5  | 1024.9902 | 2 | 44.46 | 6        | F6:2348 | OB5956 H1 Ro.raw | 0                   | 0        | 0                       | 420   | 436 | Carbamidomethylation                | Q5:Deamidation (NQ):19.68; C13:Carbamidomethylation:1000.00                         | PEAKS DB  |
| K.EGALMLPH(+14.02)FNSK.A                                   | N    | 59.24  | 1356.6860 | 12     | -3.0 | 679.3483  | 2 | 30.80 | 5        | F5:1531 | OB5955 H1 Ro.raw | 3.037E5             | 3        | 3                       | 437   | 448 | Methylation(others)                 | H8:Methylation (others):65.81                                                       | PEAKS PTM |
| A.FPGSGEQVEK.L                                             | N    | 58.82  | 1076.5138 | 10     | -3.4 | 539.2623  | 2 | 30.34 | 6        | F6:1519 | OB5956 H1 Ro.raw | 4.3607E5            | 3        | 3                       | 563   | 572 |                                     |                                                                                     | PEAKS DB  |

total 184 peptides

| Peptide                                           | Uniq | -10lgP | Mass      | Length | ppm  | m/z       | z | RT    | Fraction | Scan    | Source File      | Area roasted peanut | #Feature | #Feature roasted peanut | Start | End | PTM                                     | AScore                                                         | Found By  |
|---------------------------------------------------|------|--------|-----------|--------|------|-----------|---|-------|----------|---------|------------------|---------------------|----------|-------------------------|-------|-----|-----------------------------------------|----------------------------------------------------------------|-----------|
| K.IRPEGREGGEQEWGTPGSHVR.E                         | N    | 58.19  | 2276.1045 | 20     | 0.5  | 570.0337  | 4 | 27.56 | 5        | F5:1329 | OB5955 H1 Ro.raw | 9.9199E4            | 2        | 2                       | 147   | 166 |                                         |                                                                | PEAKS DB  |
| R.LFEVKPDKKNPQLQDLDM(+15.99)LTC(+57.02)VEIK.E     | N    | 58.02  | 3147.6018 | 26     | 2.2  | 787.9095  | 4 | 33.24 | 5        | F5:1670 | OB5955 H1 Ro.raw | 2.286E6             | 2        | 2                       | 411   | 436 | Carbamidomethylation                    | M19:Oxidation(M):40.00;C2 2:Carbamidomethylation:1000.00       | PEAKS DB  |
| K.NPQLQDLDMMLTC(+71.04)VEIK.E                     | N    | 57.51  | 2060.9944 | 17     | 3.0  | 1031.5076 | 2 | 37.24 | 5        | F5:1915 | OB5955 H1 Ro.raw | 1.057E5             | 2        | 2                       | 420   | 436 | Propionamide                            | C13:Propionamide:1000.00                                       | PEAKS PTM |
| K.K(+43.01)(+14.02)GSEEEGDITNPINLR.E              | N    | 55.92  | 1827.8962 | 16     | -0.5 | 914.9550  | 2 | 28.83 | 5        | F5:1409 | OB5955 H1 Ro.raw | 1.3944E5            | 2        | 2                       | 383   | 398 | Carbamylation; Methylation(KR)          | K1:Carbamylation:1000.00; K1:Methylation(KR):151.56            | PEAKS PTM |
| R.WGPAGPR.E                                       | N    | 54.94  | 739.3765  | 7      | 1.0  | 370.6959  | 2 | 25.22 | 4        | F4:1191 | OB5954 H1 Ro.raw | 3.1963E5            | 3        | 3                       | 115   | 121 |                                         |                                                                | PEAKS DB  |
| R.LFEVKPDKK.N                                     | N    | 54.58  | 1102.6385 | 9      | 1.1  | 552.3271  | 2 | 24.84 | 4        | F4:1157 | OB5954 H1 Ro.raw | 1.1453E6            | 6        | 6                       | 411   | 419 |                                         |                                                                | PEAKS DB  |
| K.NPQLQDLDMMLTC(+57.02)VEIKEGALMLP(+15.99)HFNSK.A | N    | 54.18  | 3387.6335 | 29     | -0.6 | 1130.2178 | 3 | 37.70 | 4        | F4:2016 | OB5954 H1 Ro.raw | 4.3311E7            | 3        | 3                       | 420   | 448 | Carbamidomethylation; Hydroxylation Pro | C13:Carbamidomethylation:1000.00; P24:Hydroxylation Pro:122.99 | PEAKS DB  |
| R.WGPAGP(+15.99)R.E                               | N    | 53.23  | 755.3714  | 7      | 2.6  | 378.6940  | 2 | 23.83 | 4        | F4:1105 | OB5954 H1 Ro.raw | 2.9481E4            | 3        | 3                       | 115   | 121 |                                         | P6:Hydroxylation Pro:38.16                                     | PEAKS DB  |
| K.NPQLQDLDM(+15.99)LTCVEIK(+14.02).E              | N    | 53.12  | 2019.9679 | 17     | 1.7  | 1010.9930 | 2 | 35.46 | 5        | F5:1802 | OB5955 H1 Ro.raw | 4.2793E5            | 1        | 1                       | 420   | 436 | Methylation(KR)                         | M10:Oxidation(M):8.14;K17:Methylation(KR):1000.00              | PEAKS PTM |
| R.EQEWEDEEEDEEGSNREVR.R.Y                         | N    | 52.77  | 2821.1545 | 22     | 1.7  | 941.3937  | 3 | 26.62 | 5        | F5:1273 | OB5955 H1 Ro.raw | 8.8078E5            | 3        | 3                       | 478   | 499 |                                         |                                                                | PEAKS DB  |
| R.QFQNLQN(+.98)HR.I                               | N    | 52.53  | 1184.5686 | 9      | 5.4  | 593.2948  | 2 | 23.60 | 6        | F6:1114 | OB5956 H1 Ro.raw | 8.0383E2            | 1        | 1                       | 205   | 213 |                                         | N7:Deamidation(NQ):0.00                                        | PEAKS DB  |
| N.PFYFPSRR.F                                      | N    | 52.44  | 1068.5504 | 8      | -0.1 | 535.2824  | 2 | 28.89 | 6        | F6:1431 | OB5956 H1 Ro.raw | 4.3491E6            | 4        | 4                       | 174   | 181 |                                         |                                                                | PEAKS DB  |

total 184 peptides



| Peptide                                                           | Uniq | -10lgP | Mass      | Length | ppm  | m/z      | z | RT    | Fraction | Scan    | Source File      | Area roasted peanut | #Feature | #Feature roasted peanut | Start | End | PTM                                 | AScore                                                                                                           | Found By  |
|-------------------------------------------------------------------|------|--------|-----------|--------|------|----------|---|-------|----------|---------|------------------|---------------------|----------|-------------------------|-------|-----|-------------------------------------|------------------------------------------------------------------------------------------------------------------|-----------|
| K.NPQLQDLDM(+15.99)M(+15.99)LTC(+57.02)VEIKEGALM(+15.99)LPHFNSK.A | N    | 52.35  | 3419.6233 | 29     | -0.9 | 855.9124 | 4 | 34.83 | 5        | F5:1766 | OB5955 H1 Ro.raw | 1.7196E6            | 3        | 3                       | 420   | 448 | Oxidation (M); Carbamidomethylation | M9:Oxidation (M):1000.00; M10:Oxidation (M):1000.00; C13:Carbamidomethylation:1000.00; M22:Oxidation (M):1000.00 | PEAKS DB  |
| R.VLLEE(+53.92)NAGGEQEER.G                                        | N    | 50.61  | 1625.6620 | 14     | -1.0 | 542.8940 | 3 | 26.76 | 5        | F5:1278 | OB5955 H1 Ro.raw | 0                   | 0        | 0                       | 332   | 345 |                                     | E5:Replacement of 2 protons by iron: 20.92                                                                       | PEAKS PTM |
| R.SRQFQNLQNHR.I                                                   | N    | 50.36  | 1426.7178 | 11     | 0.3  | 476.5800 | 3 | 24.16 | 6        | F6:1148 | OB5956 H1 Ro.raw | 6.1256E4            | 3        | 3                       | 203   | 213 |                                     |                                                                                                                  | PEAKS DB  |
| R.EGEQEW(+15.99)GTPGSHVR.E                                        | N    | 49.49  | 1583.6964 | 14     | -0.6 | 792.8550 | 2 | 25.22 | 4        | F4:1196 | OB5954 H1 Ro.raw | 3.4731E4            | 2        | 2                       | 153   | 166 | Oxidation (HW)                      | W6:Oxidation (HW):72.73                                                                                          | PEAKS PTM |
| R.ESHFVSARPQSQSP(+15.99)SSPEKEDQEEEN.Q                            | N    | 49.34  | 2973.2859 | 26     | 1.6  | 992.1041 | 3 | 24.81 | 6        | F6:1186 | OB5956 H1 Ro.raw | 3.8098E5            | 2        | 2                       | 579   | 604 |                                     | P14:Hydroxylation Pro:11.12                                                                                      | PEAKS DB  |
| R.VLLE(+21.98)ENAGGEQEER.G                                        | N    | 48.97  | 1593.7246 | 14     | -0.5 | 797.8692 | 2 | 26.81 | 5        | F5:1275 | OB5955 H1 Ro.raw | 4.3339E5            | 3        | 3                       | 332   | 345 |                                     | E4:Sodium adduct:40.00                                                                                           | PEAKS PTM |
| R.LFEVKPDK.K                                                      | N    | 48.69  | 974.5436  | 8      | 1.7  | 488.2799 | 2 | 25.30 | 5        | F5:1183 | OB5955 H1 Ro.raw | 1.7748E6            | 6        | 6                       | 411   | 418 |                                     |                                                                                                                  | PEAKS DB  |
| K.NPQLQDLDMM(+15.99)LTC(+57.02)VEIKEGALMLPHFN(+.98)SK.A           | N    | 48.63  | 3388.6174 | 29     | 6.2  | 848.1669 | 4 | 36.39 | 6        | F6:1880 | OB5956 H1 Ro.raw | 2.0276E6            | 1        | 1                       | 420   | 448 | Carbamidomethylation                | M10:Oxidation (M):27.96; C13:Carbamidomethylation:1000.00; N27:Deamidation (NQ):18.27                            | PEAKS DB  |
| R.N(+27.99)TLEAAFNAAFNEIRR.V                                      | N    | 48.34  | 1921.9282 | 16     | -1.7 | 961.9697 | 2 | 37.51 | 4        | F4:1908 | OB5954 H1 Ro.raw | 4.2206E4            | 1        | 1                       | 316   | 331 | Formylation                         | N1:Formylation:1000.00                                                                                           | PEAKS PTM |
| R.NT(-18.01)LEAAFNAAFNEIRR.V                                      | N    | 48.27  | 1875.9227 | 16     | -1.8 | 626.3137 | 3 | 34.20 | 4        | F4:1731 | OB5954 H1 Ro.raw | 1.108E7             | 3        | 3                       | 316   | 331 | Dehydration                         | T2:Dehydration:1000.00                                                                                           | PEAKS PTM |

total 184 peptides

| Peptide                                                         | Uniq | -10lgP | Mass      | Length | ppm  | m/z       | z | RT    | Fraction | Scan    | Source File      | Area roasted peanut | #Feature | #Feature roasted peanut | Start | End | PTM                                | AScore                                                                                                   | Found By  |
|-----------------------------------------------------------------|------|--------|-----------|--------|------|-----------|---|-------|----------|---------|------------------|---------------------|----------|-------------------------|-------|-----|------------------------------------|----------------------------------------------------------------------------------------------------------|-----------|
| R.LFEVKPDKKPNQLQLDLM(+15.99)MLTC(+57.02)VEIK.E                  | N    | 48.12  | 3147.6018 | 26     | -1.9 | 787.9062  | 4 | 34.20 | 4        | F4:1734 | OB5954 H1 Ro.raw | 2.5552E6            | 4        | 4                       | 411   | 436 | Carbamidomethylation               | M18:Oxidation (M):33.98;C2 2:Carbamidomethylation:1000.00                                                | PEAKS DB  |
| K.KNPQLQLDMM(+15.99)LTC(+57.02)VEIKEGALM(+15.99)LPHFNSK.A       | N    | 47.73  | 3531.7234 | 30     | -1.1 | 883.9372  | 4 | 35.80 | 5        | F5:1822 | OB5955 H1 Ro.raw | 0                   | 0        | 0                       | 419   | 448 | Carbamidomethylation               | M11:Oxidation (M):0.00;C14:Carbamidomethylation:1000.00;M23:Oxidation (M):45.87                          | PEAKS DB  |
| R.DQSSY(-18.01)LQGFSR.N                                         | N    | 47.62  | 1268.5785 | 11     | -0.6 | 635.2961  | 2 | 30.85 | 6        | F6:1579 | OB5956 H1 Ro.raw | 2.6456E5            | 1        | 1                       | 305   | 315 |                                    | Y5:Dehydration:0.00                                                                                      | PEAKS PTM |
| R.NTLEAAFNAEFN(+.98)EIR.R                                       | N    | 47.43  | 1738.8162 | 15     | 9.2  | 870.4233  | 2 | 44.36 | 5        | F5:2303 | OB5955 H1 Ro.raw | 5.1969E3            | 1        | 1                       | 316   | 330 |                                    | N12:Deamidation (NQ):0.00                                                                                | PEAKS DB  |
| K.NPQLQ(+.98)DLDM(+15.99)MLTC(+57.02)VEIKEGALM(+15.99)LPHFNSK.A | N    | 47.00  | 3404.6125 | 29     | -0.4 | 1135.8777 | 3 | 36.69 | 5        | F5:1878 | OB5955 H1 Ro.raw | 3.8413E5            | 1        | 1                       | 420   | 448 | Carbamidomethylation               | Q5:Deamidation (NQ):45.47;M9:Oxidation (M):0.00;C13:Carbamidomethylation:1000.00;M22:Oxidation (M):38.75 | PEAKS DB  |
| K.D(+43.01)(+14.02)LAFPGSGEQVEK.L                               | N    | 46.93  | 1432.6833 | 13     | -0.1 | 717.3489  | 2 | 31.08 | 4        | F4:1535 | OB5954 H1 Ro.raw | 9.9373E5            | 3        | 3                       | 560   | 572 | Carbamylation; Methylation(others) | D1:Carbamylation:220.79;D1:Methylation (others):132.53                                                   | PEAKS PTM |
| F.PGSGEQVEK.L                                                   | N    | 46.51  | 929.4454  | 9      | -3.7 | 465.7282  | 2 | 30.34 | 6        | F6:1524 | OB5956 H1 Ro.raw | 5.467E4             | 1        | 1                       | 564   | 572 |                                    |                                                                                                          | PEAKS DB  |
| R.ESHFVSARPSQSP(+15.99)SSPEKEDQEEE.N                            | N    | 46.47  | 2859.2429 | 25     | 2.4  | 954.0906  | 3 | 24.92 | 5        | F5:1173 | OB5955 H1 Ro.raw | 7.3448E4            | 1        | 1                       | 579   | 603 |                                    | P14:Hydroxylation Pro:26.52                                                                              | PEAKS DB  |
| R.DQSSYLQGFSR(+15.99).N                                         | N    | 46.23  | 1302.5840 | 11     | 2.5  | 652.3009  | 2 | 30.63 | 5        | F5:1518 | OB5955 H1 Ro.raw | 1.9563E5            | 4        | 4                       | 305   | 315 |                                    | R11:Oxidation or Hydroxylation:42.88                                                                     | PEAKS PTM |

total 184 peptides

| Peptide                                                | Uniq | -10lgP | Mass      | Length | ppm  | m/z      | z | RT    | Fraction | Scan    | Source File            | Area roasted peanut | #Feature | #Feature roasted peanut | Start | End | PTM                                    | AScore                                                                               | Found By  |
|--------------------------------------------------------|------|--------|-----------|--------|------|----------|---|-------|----------|---------|------------------------|---------------------|----------|-------------------------|-------|-----|----------------------------------------|--------------------------------------------------------------------------------------|-----------|
| R.LFEVKPDKKNPQLQ(+.98)DLDMM(+15.99)LTC(+57.02)VEIK.E   | N    | 45.61  | 3148.5857 | 26     | 7.4  | 788.1595 | 4 | 33.17 | 5        | F5:1670 | OB5955<br>H1<br>Ro.raw | 4.4314E5            | 1        | 1                       | 411   | 436 | Carbamidomethylation                   | Q14:Deamidation (N Q):0.00;M19:Oxidation (M):23.10;C22:Carbamidomethylation:1000.00  | PEAKS DB  |
| K.KNPQLQDLDM(+15.99)MLTC(+57.02)VEIKEGALMLPHFNSK.A     | N    | 45.13  | 3515.7285 | 30     | -1.9 | 879.9377 | 4 | 35.30 | 4        | F4:1798 | OB5954<br>H1<br>Ro.raw | 6.4172E5            | 1        | 1                       | 419   | 448 | Carbamidomethylation                   | M10:Oxidation (M):14.02;C14:Carbamidomethylation:1000.00                             | PEAKS DB  |
| R.NTLEAAFNAEFN(+.98)EIRR.V                             | N    | 45.08  | 1894.9172 | 16     | -4.2 | 948.4619 | 2 | 33.08 | 4        | F4:1691 | OB5954<br>H1<br>Ro.raw | 2.2628E6            | 3        | 3                       | 316   | 331 |                                        | N12:Deamidation (N Q):39.02                                                          | PEAKS DB  |
| R.N(+.98)TLEAAFNAEFNEIRR.V                             | N    | 44.42  | 1894.9172 | 16     | 3.8  | 948.4695 | 2 | 36.66 | 6        | F6:1890 | OB5956<br>H1<br>Ro.raw | 1.2834E6            | 2        | 2                       | 316   | 331 |                                        | N1:Deamidation (NQ):41.52                                                            | PEAKS DB  |
| R.ESHFVSARP(+15.99)QSQSPSSPEKEDQEEEN.Q                 | N    | 44.15  | 2973.2859 | 26     | 2.8  | 992.1053 | 3 | 24.92 | 5        | F5:1161 | OB5955<br>H1<br>Ro.raw | 1.8315E5            | 1        | 1                       | 579   | 604 |                                        | P9:Hydroxylation Pro:18.35                                                           | PEAKS DB  |
| R.IVQIEAKPNTLVLP(+15.99)K.H                            | N    | 43.33  | 1678.0028 | 15     | -1.5 | 840.0074 | 2 | 30.25 | 5        | F5:1488 | OB5955<br>H1<br>Ro.raw | 0                   | 0        | 0                       | 214   | 228 |                                        | P14:Hydroxylation Pro:0.00                                                           | PEAKS DB  |
| R.D(-18.01)QSSYLQGFNR.N                                | N    | 43.26  | 1268.5785 | 11     | 1.6  | 635.2975 | 2 | 29.92 | 6        | F6:1489 | OB5956<br>H1<br>Ro.raw | 0                   | 0        | 0                       | 305   | 315 |                                        | D1:Dehydration:0.00                                                                  | PEAKS PTM |
| R.IVQIEAKP(+15.99)NTLVLPK.H                            | N    | 43.09  | 1678.0028 | 15     | -0.7 | 840.0081 | 2 | 30.35 | 4        | F4:1495 | OB5954<br>H1<br>Ro.raw | 1.2596E5            | 3        | 3                       | 214   | 228 |                                        | P8:Hydroxylation Pro:25.21                                                           | PEAKS DB  |
| R.LFEVKPDKKNPQLQDLDM(+15.99)M(+15.99)LTC(+57.02)VEIK.E | N    | 43.03  | 3163.5967 | 26     | -3.4 | 791.9037 | 4 | 32.67 | 6        | F6:1663 | OB5956<br>H1<br>Ro.raw | 2.1471E6            | 3        | 3                       | 411   | 436 | Oxidation (M);<br>Carbamidomethylation | M18:Oxidation (M):1000.00;M19:Oxidation (M):1000.00;C22:Carbamidomethylation:1000.00 | PEAKS DB  |
| T.GNLELVAVRK.E                                         | N    | 43.00  | 1097.6556 | 10     | 0.5  | 549.8354 | 2 | 27.00 | 5        | F5:1296 | OB5955<br>H1<br>Ro.raw | 3.6527E5            | 3        | 3                       | 460   | 469 |                                        |                                                                                      | PEAKS DB  |

total 184 peptides

| Peptide                                                   | Uniq | -10lgP | Mass      | Length | ppm  | m/z      | z | RT    | Fraction | Scan    | Source File            | Area roasted peanut | #Feature | #Feature roasted peanut | Start | End | PTM                             | AScore                                                                                | Found By  |
|-----------------------------------------------------------|------|--------|-----------|--------|------|----------|---|-------|----------|---------|------------------------|---------------------|----------|-------------------------|-------|-----|---------------------------------|---------------------------------------------------------------------------------------|-----------|
| K.KN(+.98)PQLQ(+.98)DLDMMLTC(+57.02)VEIKEGALMLPHFNSK.A    | N    | 42.92  | 3501.7017 | 30     | 7.8  | 876.4395 | 4 | 36.93 | 6        | F6:1903 | OB5956<br>H1<br>Ro.raw | 5.6427E6            | 1        | 1                       | 419   | 448 | Carbamidomethylation            | N2:Deamidation (NQ):14.04; Q6:Deamidation (NQ):0.00; C14:Carbamidomethylation:1000.00 | PEAKS DB  |
| R.V(+43.01)LLE(+14.02)ENAGGEQEER.G                        | N    | 42.24  | 1628.7642 | 14     | 1.7  | 815.3907 | 2 | 27.00 | 5        | F5:1297 | OB5955<br>H1<br>Ro.raw | 4.2233E5            | 3        | 3                       | 332   | 345 | Carbamylation                   | V1:Carbamylation:100.00; E4:Methylation (others):30.46                                | PEAKS PTM |
| K.D(+15.99)LAFIGSGEQVEK.L                                 | N    | 42.08  | 1391.6569 | 13     | 0.4  | 696.8360 | 2 | 29.40 | 5        | F5:1368 | OB5955<br>H1<br>Ro.raw | 5.511E5             | 2        | 2                       | 560   | 572 | Oxidation or Hydroxylation      | D1:Oxidation or Hydroxylation:77.13                                                   | PEAKS PTM |
| K.KNPQLQDLDM(+15.99)LTC(+57.02)VEIKEGALMLPHFNSK.A         | N    | 42.02  | 3515.7285 | 30     | 1.3  | 879.9406 | 4 | 35.25 | 5        | F5:1790 | OB5955<br>H1<br>Ro.raw | 0                   | 0        | 0                       | 419   | 448 | Carbamidomethylation            | M11:Oxidation (M):12.28; C14:Carbamidomethylation:1000.00                             | PEAKS DB  |
| K.EGALM(+15.99)LPHFN(+.98)SK.A                            | N    | 41.90  | 1359.6493 | 12     | 2.8  | 680.8338 | 2 | 31.22 | 4        | F4:1550 | OB5954<br>H1<br>Ro.raw | 0                   | 0        | 0                       | 437   | 448 | Oxidation (M); Deamidation (NQ) | M5:Oxidation (M):100.00; N10:Deamidation (NQ):1000.00                                 | PEAKS DB  |
| K.NPQLQDLDM(-48.00)MLTC(+57.02)VEIK.E                     | N    | 41.66  | 1998.9755 | 17     | 6.7  | 667.3369 | 3 | 34.52 | 6        | F6:1773 | OB5956<br>H1<br>Ro.raw | 2.0007E6            | 2        | 2                       | 420   | 436 | Carbamidomethylation            | M9:Dehydration:11.06; C13:Carbamidomethylation:1000.00                                | PEAKS PTM |
| K.GTGNLELVAVRKEQQQR.G                                     | N    | 41.33  | 1925.0442 | 17     | 1.4  | 642.6896 | 3 | 26.67 | 6        | F6:1294 | OB5956<br>H1<br>Ro.raw | 2.686E4             | 1        | 1                       | 458   | 474 |                                 |                                                                                       | PEAKS DB  |
| K.NPQLQDLDMMLTC(+57.02)VEIK(+43.01)EGALMLPHFNSK(+14.02).A | N    | 41.19  | 3428.6602 | 29     | -1.5 | 858.1710 | 4 | 37.84 | 6        | F6:1971 | OB5956<br>H1<br>Ro.raw | 2.9855E6            | 1        | 1                       | 420   | 448 | Carbamidomethylation            | C13:Carbamidomethylation:1000.00; K17:Carbamylation:1.67; K29:Metallation (KR):1.67   | PEAKS PTM |

total 184 peptides

| Peptide                                           | Uniq | -10lgP | Mass      | Length | ppm  | m/z       | z | RT    | Fraction | Scan    | Source File      | Area roasted peanut | #Feature | #Feature roasted peanut | Start | End | PTM                                                         | AScore                                                                           | Found By  |
|---------------------------------------------------|------|--------|-----------|--------|------|-----------|---|-------|----------|---------|------------------|---------------------|----------|-------------------------|-------|-----|-------------------------------------------------------------|----------------------------------------------------------------------------------|-----------|
| K.NPQ(+.98)LQDLMLTLC(+57.02)VEIK.E                | N    | 41.15  | 2047.9629 | 17     | 2.9  | 1024.9917 | 2 | 46.45 | 4        | F4:2441 | OB5954 H1 Ro.raw | 0                   | 0        | 0                       | 420   | 436 | Carbamidomethylation                                        | Q3:Deamidation (NQ): 14.04; C13:Carbamidomethylation:1000.00                     | PEAKS DB  |
| R.EQEWEEEEEEEEEGSNREVR.R                          | N    | 41.08  | 2665.0535 | 21     | 2.4  | 889.3605  | 3 | 27.88 | 4        | F4:1353 | OB5954 H1 Ro.raw | 4.8884E4            | 1        | 1                       | 478   | 498 |                                                             |                                                                                  | PEAKS DB  |
| R.VLLEEN(+.98)AGGEQEERGQR.R                       | N    | 40.76  | 1913.9078 | 17     | -1.6 | 638.9755  | 3 | 25.99 | 4        | F4:1234 | OB5954 H1 Ro.raw | 0                   | 0        | 0                       | 332   | 348 |                                                             | N6:Deamidation (NQ): 28.79                                                       | PEAKS DB  |
| R.EGE(+21.98)QEWGTPGSHVR.E                        | N    | 40.62  | 1589.6835 | 14     | 1.4  | 795.8501  | 2 | 25.83 | 4        | F4:1231 | OB5954 H1 Ro.raw | 3.6173E3            | 1        | 1                       | 153   | 166 |                                                             | E3:Sodium adduct:9.74                                                            | PEAKS PTM |
| K.GT(-18.01)GNLELVAVRK.E                          | N    | 40.55  | 1237.7142 | 12     | 2.6  | 413.5797  | 3 | 27.00 | 5        | F5:1287 | OB5955 H1 Ro.raw | 9.9167E5            | 2        | 2                       | 458   | 469 | Dehydration                                                 | T2:Dehydration:1000.00                                                           | PEAKS PTM |
| K.KNPQLQ(+.98)DLDMMLTLC(+57.02)VEIKEGALMLPHFNSK.A | N    | 40.26  | 3500.7175 | 30     | 3.4  | 876.1896  | 4 | 37.51 | 4        | F4:1896 | OB5954 H1 Ro.raw | 1.6398E6            | 1        | 1                       | 419   | 448 | Carbamidomethylation                                        | Q6:Deamidation (NQ): 12.19; C14:Carbamidomethylation:1000.00                     | PEAKS DB  |
| V.QIEAKPNTLVLPK.H                                 | N    | 39.98  | 1449.8555 | 13     | -3.8 | 725.9323  | 2 | 30.34 | 6        | F6:1513 | OB5956 H1 Ro.raw | 4.8564E4            | 1        | 1                       | 216   | 228 |                                                             |                                                                                  | PEAKS DB  |
| R.IVQIEAKPN.T                                     | N    | 39.98  | 1010.5760 | 9      | -0.3 | 506.2951  | 2 | 25.40 | 5        | F5:1199 | OB5955 H1 Ro.raw | 0                   | 0        | 0                       | 214   | 222 |                                                             |                                                                                  | PEAKS DB  |
| R.I(+42.01)VQ(+15.00)IEAKPNTLVLPK.H               | N    | 38.96  | 1719.0182 | 15     | 2.8  | 860.5188  | 2 | 30.87 | 6        | F6:1547 | OB5956 H1 Ro.raw | 4.4118E5            | 2        | 2                       | 214   | 228 | Acetylation (N-term); Deamidation followed by a methylation | I1:Acetylation (N-term):1000.00; Q3:Deamidation followed by a methylation:129.72 | PEAKS PTM |
| R.EEDWRQPR.E                                      | N    | 38.91  | 1114.5155 | 8      | 1.8  | 558.2661  | 2 | 23.91 | 4        | F4:1112 | OB5954 H1 Ro.raw | 0                   | 0        | 0                       | 126   | 133 |                                                             |                                                                                  | PEAKS DB  |
| K.EGALM(-48.00)LPHFNSK.A                          | N    | 38.72  | 1294.6670 | 12     | 1.5  | 432.5636  | 3 | 28.65 | 5        | F5:1381 | OB5955 H1 Ro.raw | 3.9929E6            | 3        | 3                       | 437   | 448 | Dethiomethyl                                                | M5:Dethiomethyl:1000.00                                                          | PEAKS PTM |
| K.PNTLVLPK.H                                      | N    | 38.45  | 880.5382  | 8      | -2.9 | 441.2751  | 2 | 28.00 | 6        | F6:1374 | OB5956 H1 Ro.raw | 1.9367E5            | 2        | 2                       | 221   | 228 |                                                             |                                                                                  | PEAKS DB  |
| E.VSKEH(+15.99)VEELTK.H                           | N    | 37.60  | 1313.6826 | 11     | 0.8  | 657.8491  | 2 | 24.35 | 6        | F6:1164 | OB5956 H1 Ro.raw | 1.7908E4            | 3        | 3                       | 365   | 375 | Oxidation (HW)                                              | H5:Oxidation (HW):1000.00                                                        | PEAKS PTM |

total 184 peptides

| Peptide                                                 | Uniq | -10lgP | Mass      | Length | ppm  | m/z       | z | RT    | Fraction | Scan    | Source File      | Area roasted peanut | #Feature | #Feature roasted peanut | Start | End | PTM                  | AScore                                                                                                    | Found By  |
|---------------------------------------------------------|------|--------|-----------|--------|------|-----------|---|-------|----------|---------|------------------|---------------------|----------|-------------------------|-------|-----|----------------------|-----------------------------------------------------------------------------------------------------------|-----------|
| R.EGEQEWGTP(+15.99)GSHVRETSR.N                          | N    | 37.53  | 2185.9624 | 19     | 0.3  | 729.6616  | 3 | 25.63 | 4        | F4:1213 | OB5954 H1 Ro.raw | 4.5841E4            | 1        | 1                       | 153   | 171 | Hydroxylation Pro    | P9:Hydroxylation Pro:1000.00                                                                              | PEAKS DB  |
| K.KGSEEEGDIT(-18.01)N(+.98)PINLR.E                      | N    | 37.46  | 1753.8483 | 16     | -1.2 | 585.6227  | 3 | 28.83 | 5        | F5:1398 | OB5955 H1 Ro.raw | 7.9917E5            | 2        | 2                       | 383   | 398 | Deamidation (NQ)     | T10:Dehydration:19.68;N11:Deamidation (NQ):77.24                                                          | PEAKS PTM |
| R.N(+.98)TLEAAFNAEFNEIR.R                               | N    | 36.98  | 1738.8162 | 15     | 9.2  | 870.4233  | 2 | 44.36 | 5        | F5:2311 | OB5955 H1 Ro.raw | 5.1969E3            | 1        | 1                       | 316   | 330 |                      | N1:Deamidation (NQ):21.41                                                                                 | PEAKS DB  |
| R.REQEW(+15.99)EEEEDEEEEGSNR.E                          | N    | 36.76  | 2452.9375 | 19     | -0.5 | 818.6527  | 3 | 25.98 | 4        | F4:1239 | OB5954 H1 Ro.raw | 6.7106E4            | 2        | 2                       | 477   | 495 | Oxidation (HW)       | W5:Oxidation (HW):1000.00                                                                                 | PEAKS PTM |
| K.AMVIVVINK(+43.01)GTGNLELVAVRK.E                       | Y    | 36.30  | 2266.3196 | 21     | 1.3  | 756.4481  | 3 | 33.23 | 6        | F6:1673 | OB5956 H1 Ro.raw | 3.1381E6            | 1        | 1                       | 449   | 469 |                      | K9:Carbamylation:49.34                                                                                    | PEAKS PTM |
| K.NPQLQ(+.98)DLDMMLTC(+15.99)VEIKEGALM(+15.99)LPHFNSK.A | N    | 36.05  | 3404.6125 | 29     | -1.8 | 852.1589  | 4 | 38.22 | 6        | F6:1993 | OB5956 H1 Ro.raw | 8.1948E5            | 1        | 1                       | 420   | 448 | Carbamidomethylation | Q5:Deamidation (NQ):30.14;M10:Oxidation (M):0.00;C13:Carbamidomethylation:1000.00;M22:Oxidation (M):14.60 | PEAKS DB  |
| K.NPQLQDLDMMLTCVEIK(+14.02)EGALM(+15.99)LPHFNSK.A       | N    | 36.00  | 3344.6277 | 29     | -0.2 | 837.1640  | 4 | 37.84 | 6        | F6:1961 | OB5956 H1 Ro.raw | 7.3561E6            | 2        | 2                       | 420   | 448 |                      | K17:Methylation(KR):22.74;M22:Oxidation (M):20.37                                                         | PEAKS PTM |
| K.NPQLQDLDMMLTC(+71.04)VEIKEGALMLPHFNSK.A               | N    | 35.62  | 3385.6543 | 29     | -1.5 | 1129.5570 | 3 | 38.07 | 4        | F4:1978 | OB5954 H1 Ro.raw | 1.5713E5            | 1        | 1                       | 420   | 448 | Propionamide         | C13:Propionamide:1000.00                                                                                  | PEAKS PTM |
| R.N(-17.03)NPFFPSRR.F                                   | N    | 35.47  | 1279.6097 | 10     | 1.1  | 427.5443  | 3 | 28.89 | 6        | F6:1434 | OB5956 H1 Ro.raw | 5.7683E5            | 3        | 3                       | 172   | 181 |                      | N1:Ammonia-loss (N):9.34                                                                                  | PEAKS PTM |
| R.NTLEAAFNAEFN(+15.99)EIRR.V                            | N    | 35.08  | 1909.9282 | 16     | 0.9  | 955.9723  | 2 | 32.98 | 5        | F5:1662 | OB5955 H1 Ro.raw | 2.4059E6            | 2        | 2                       | 316   | 331 |                      | N12:Oxidation or Hydroxylation:9.28                                                                       | PEAKS PTM |
| R.NNPFFYP(+15.99)SRR.F                                  | N    | 34.32  | 1312.6312 | 10     | -0.5 | 657.3226  | 2 | 28.74 | 5        | F5:1397 | OB5955 H1 Ro.raw | 7.8182E5            | 1        | 1                       | 172   | 181 |                      | P7:Hydroxylation Pro:32.48                                                                                | PEAKS DB  |

total 184 peptides

| Peptide                                                 | Uniq | -10lgP | Mass      | Length | ppm  | m/z       | z | RT    | Fraction | Scan    | Source File      | Area roasted peanut | #Feature | #Feature roasted peanut | Start | End | PTM                  | AScore                                                                             | Found By  |
|---------------------------------------------------------|------|--------|-----------|--------|------|-----------|---|-------|----------|---------|------------------|---------------------|----------|-------------------------|-------|-----|----------------------|------------------------------------------------------------------------------------|-----------|
| K.NPQLQ(+.98)DLDMMLTC(+57.02)VEIK.E                     | N    | 34.13  | 1999.9595 | 17     | 9.3  | 1000.9963 | 2 | 32.90 | 4        | F4:1653 | OB5954 H1 Ro.raw | 1.9871E6            | 1        | 1                       | 420   | 436 | Carbamidomethylation | Q5:Deamidation (NQ): 11.12; M10:Deamidation:0.00;C13:Carbamidomethylation:1000.00  | PEAKS PTM |
| K.DLAFPGSGE(+53.92)QVEK.L                               | N    | 33.99  | 1429.5812 | 13     | -6.3 | 715.7933  | 2 | 30.34 | 6        | F6:1518 | OB5956 H1 Ro.raw | 6.355E5             | 2        | 2                       | 560   | 572 |                      | E9:Replacement of 2 protons by iron: 37.54                                         | PEAKS PTM |
| K.NPQ(+.98)LQDLDMMLTC(+57.02)VEIKEGALM(+15.99)LPHFNSK.A | N    | 33.64  | 3388.6174 | 29     | 6.0  | 1130.5532 | 3 | 38.52 | 5        | F5:2024 | OB5955 H1 Ro.raw | 7.1577E5            | 1        | 1                       | 420   | 448 | Carbamidomethylation | Q3:Deamidation (NQ): 0.00;C13:Carbamidomethylation:1000.00;M22:Oxidation (M):34.40 | PEAKS DB  |
| N.PFYFPSR.R                                             | N    | 33.58  | 912.4493  | 7      | -0.1 | 457.2319  | 2 | 31.70 | 5        | F5:1584 | OB5955 H1 Ro.raw | 8.1854E4            | 1        | 1                       | 174   | 180 |                      |                                                                                    | PEAKS DB  |
| R.IVQ(+.98)IEAKPNTLVLPK.H                               | N    | 33.40  | 1662.9919 | 15     | 8.1  | 832.5100  | 2 | 30.29 | 5        | F5:1525 | OB5955 H1 Ro.raw | 3.5708E6            | 1        | 1                       | 214   | 228 |                      | Q3:Deamidation (NQ): 22.65                                                         | PEAKS DB  |
| K.D(+53.92)LAFPGSGEQVEK.L                               | N    | 33.35  | 1429.5812 | 13     | -4.3 | 715.7948  | 2 | 30.56 | 4        | F4:1500 | OB5954 H1 Ro.raw | 3.8253E5            | 1        | 1                       | 560   | 572 |                      | D1:Replacement of 2 protons by iron: 0.00                                          | PEAKS PTM |
| K.N(+.98)PQLQDLDMMLTC(+57.02)VEIKEGALM(+15.99)LPHFNSK.A | N    | 33.25  | 3388.6174 | 29     | 6.0  | 1130.5532 | 3 | 38.52 | 5        | F5:2054 | OB5955 H1 Ro.raw | 7.1577E5            | 1        | 1                       | 420   | 448 | Carbamidomethylation | N1:Deamidation (NQ): 0.00;C13:Carbamidomethylation:1000.00;M22:Oxidation (M):0.00  | PEAKS DB  |
| R.Q(+.98)FQNLQNH.R                                      | N    | 33.25  | 1184.5686 | 9      | 4.6  | 593.2943  | 2 | 23.68 | 5        | F5:1098 | OB5955 H1 Ro.raw | 0                   | 0        | 0                       | 205   | 213 |                      | Q1:Deamidation (NQ): 25.21                                                         | PEAKS DB  |
| R.IFLAGDKDNVVDQIEK(+14.02).Q                            | Y    | 33.10  | 1816.9570 | 16     | 0.9  | 606.6602  | 3 | 61.67 | 6        | F6:3449 | OB5956 H1 Ro.raw | 4.4688E4            | 2        | 2                       | 541   | 556 | Methylation(KR)      | K16:Methylation(KR): 61.14                                                         | PEAKS PTM |

total 184 peptides

| Peptide                                                 | Uniq | -10lgP | Mass      | Length | ppm  | m/z       | z | RT    | Fraction | Scan    | Source File      | Area roasted peanut | #Feature | #Feature roasted peanut | Start | End | PTM                                | AScore                                                                             | Found By  |
|---------------------------------------------------------|------|--------|-----------|--------|------|-----------|---|-------|----------|---------|------------------|---------------------|----------|-------------------------|-------|-----|------------------------------------|------------------------------------------------------------------------------------|-----------|
| K.N(+.98)PQLQDLDM(+15.99)MLTC(+57.02)VEIKEGALMLPHFNSK.A | N    | 33.01  | 3388.6174 | 29     | 8.2  | 1695.3300 | 2 | 37.72 | 4        | F4:1941 | OB5954 H1 Ro.raw | 7.0286E5            | 1        | 1                       | 420   | 448 | Carbamidomethylation               | N1:Deamidation (NQ):0.00;M9:Oxidation (M):0.00;C13:Carbamidomethylation:1000.00    | PEAKS DB  |
| K.E(-18.01)GALMLPHFNSK.A                                | N    | 32.81  | 1324.6598 | 12     | 0.0  | 442.5605  | 3 | 30.63 | 5        | F5:1521 | OB5955 H1 Ro.raw | 2.0893E5            | 2        | 2                       | 437   | 448 | Pyro-glu from E                    | E1:Pyro-glu from E:1000.00                                                         | PEAKS PTM |
| K.KNPQLQDLDM(-48.00)MLTC(+57.02)VEIK.E                  | N    | 32.73  | 2127.0703 | 18     | 1.8  | 710.0320  | 3 | 33.04 | 6        | F6:1688 | OB5956 H1 Ro.raw | 7.9877E5            | 1        | 1                       | 419   | 436 | Carbamidomethylation               | M10:Deamidation:8.14;C14:Carbamidomethylation:1000.00                              | PEAKS PTM |
| K.G(+43.01)S(+14.02)EEEGDITNPINLR.E                     | N    | 32.64  | 1699.8013 | 15     | -3.0 | 850.9054  | 2 | 30.85 | 6        | F6:1556 | OB5956 H1 Ro.raw | 4.7917E4            | 1        | 1                       | 384   | 398 | Carbamylation                      | G1:Carbamylation:1000.00;S2:Methylation (others):0.00                              | PEAKS PTM |
| K.KNPQLQ(+.98)DLDM(+15.99)LTC(+57.02)VEIKEGALMLPHFNSK.A | N    | 32.59  | 3516.7124 | 30     | 3.3  | 880.1883  | 4 | 35.48 | 4        | F4:1798 | OB5954 H1 Ro.raw | 7.7853E5            | 1        | 1                       | 419   | 448 | Carbamidomethylation               | Q6:Deamidation (NQ):23.13;M11:Oxidation (M):14.02;C14:Carbamidomethylation:1000.00 | PEAKS DB  |
| K.G(+43.01)T(+14.02)GNLELVAVRK.E                        | N    | 32.58  | 1312.7462 | 12     | -0.4 | 657.3801  | 2 | 27.30 | 4        | F4:1303 | OB5954 H1 Ro.raw | 3.8825E5            | 2        | 2                       | 458   | 469 | Carbamylation; Methylation(others) | G1:Carbamylation:147.00;T2:Methylation (others):68.07                              | PEAKS PTM |
| H.RIVQIEAKPNTLVLPK.H                                    | N    | 32.22  | 1818.1090 | 16     | 0.6  | 607.0439  | 3 | 29.55 | 5        | F5:1454 | OB5955 H1 Ro.raw | 8.094E4             | 1        | 1                       | 213   | 228 |                                    |                                                                                    | PEAKS DB  |
| K.G(+43.01)T(+14.02)GNLELVAVR.K                         | N    | 32.00  | 1184.6514 | 11     | -2.2 | 593.3317  | 2 | 30.21 | 4        | F4:1493 | OB5954 H1 Ro.raw | 1.7455E5            | 2        | 2                       | 458   | 468 | Carbamylation                      | G1:Carbamylation:1000.00;T2:Methylation (others):46.31                             | PEAKS PTM |

total 184 peptides



| Peptide                                                                     | Uniq | -10lgP | Mass      | Length | ppm  | m/z       | z | RT    | Fraction | Scan    | Source File      | Area roasted peanut | #Feature | #Feature roasted peanut | Start | End | PTM                                    | AScore                                                                                                                                                                | Found By  |
|-----------------------------------------------------------------------------|------|--------|-----------|--------|------|-----------|---|-------|----------|---------|------------------|---------------------|----------|-------------------------|-------|-----|----------------------------------------|-----------------------------------------------------------------------------------------------------------------------------------------------------------------------|-----------|
| K.NPQLQ(+.98)DLDMMLTC(+57.02)VEIKEGALMLPHFNSK.A                             | N    | 31.45  | 3372.6226 | 29     | 7.2  | 844.1690  | 4 | 45.92 | 6        | F6:2433 | OB5956 H1 Ro.raw | 0                   | 0        | 0                       | 420   | 448 | Carbamidomethylation                   | Q5:Deamidation (NQ): 14.19; C13:Carbamidomethylation:1000.00                                                                                                          | PEAKS DB  |
| K.KN(+.98)PQLQDLDMMLTC(+57.02)VEIKEGALMLPHFNSK.A                            | N    | 31.43  | 3500.7175 | 30     | 4.4  | 1167.9182 | 3 | 36.77 | 4        | F4:1901 | OB5954 H1 Ro.raw | 9.2406E4            | 1        | 1                       | 419   | 448 | Carbamidomethylation                   | N2:Deamidation (NQ): 14.04; C14:Carbamidomethylation:1000.00                                                                                                          | PEAKS DB  |
| R.IFLAGDK(+14.02)DNVVDQIEK.Q                                                | Y    | 30.97  | 1816.9570 | 16     | 8.3  | 909.4933  | 2 | 55.20 | 6        | F6:2979 | OB5956 H1 Ro.raw | 7.7523E4            | 2        | 2                       | 541   | 556 |                                        | K7:Methylation (KR):18.04                                                                                                                                             | PEAKS PTM |
| R.WGP(+15.99)AGPR.E                                                         | N    | 30.77  | 755.3714  | 7      | 1.0  | 378.6934  | 2 | 23.04 | 6        | F6:1080 | OB5956 H1 Ro.raw | 1.1224E4            | 3        | 3                       | 115   | 121 |                                        | P3:Hydroxylation Pro: 30.72                                                                                                                                           | PEAKS DB  |
| K.N(+.98)PQ(+.98)LQ(+.98)DLDM(+15.99)MLTC(+57.02)VEIKEGALM(+15.99)LPHFNSK.A | N    | 30.70  | 3406.5806 | 29     | 9.9  | 1136.5454 | 3 | 36.75 | 6        | F6:1904 | OB5956 H1 Ro.raw | 3.0926E5            | 1        | 1                       | 420   | 448 | Deamidation (NQ); Carbamidomethylation | N1:Deamidation (NQ): 69.03; Q3:Deamidation (NQ): 71.61; Q5:Deamidation (NQ): 53.75; M9:Oxidation (M):17.01; C13:Carbamidomethylation:1000.00; M22:Oxidation (M):16.22 | PEAKS DB  |
| R.LFEVKPDKKNPQLQDLDM(+31.99)LTC(+57.02)VEIK.E                               | N    | 29.63  | 3163.5967 | 26     | -2.8 | 791.9042  | 4 | 32.90 | 4        | F4:1683 | OB5954 H1 Ro.raw | 1.0179E6            | 1        | 1                       | 411   | 436 | Carbamidomethylation                   | M19:Suiphone: 14.02; C22:Carbamidomethylation:1000.00                                                                                                                 | PEAKS PTM |
| R.GRREQEW(+15.99)EEEEEEEEEGSNR.E                                            | N    | 29.48  | 2666.0601 | 21     | 0.8  | 889.6946  | 3 | 26.10 | 4        | F4:1240 | OB5954 H1 Ro.raw | 0                   | 0        | 0                       | 475   | 495 | Oxidation (HW)                         | W7:Oxidation (HW):1000.00                                                                                                                                             | PEAKS PTM |

total 184 peptides

| Peptide                                                       | Uniq | -10lgP | Mass      | Length | ppm  | m/z       | z | RT    | Fraction | Scan    | Source File            | Area roasted peanut | #Feature | #Feature roasted peanut | Start | End | PTM                              | AScore                                                                                                     | Found By  |
|---------------------------------------------------------------|------|--------|-----------|--------|------|-----------|---|-------|----------|---------|------------------------|---------------------|----------|-------------------------|-------|-----|----------------------------------|------------------------------------------------------------------------------------------------------------|-----------|
| K.N(+.98)PQLQ(+.98)DLDMMLTC(+57.02)VEIKEGALM(+15.99)LPHFNSK.A | N    | 29.27  | 3389.6016 | 29     | 9.6  | 848.4158  | 4 | 37.65 | 6        | F6:2047 | OB5956<br>H1<br>Ro.raw | 8.4697E6            | 1        | 1                       | 420   | 448 | Carbamidomethylation             | N1:Deamidation (NQ):0.00;Q5:Deamidation (NQ):14.04;C13:Carbamidomethylation:1000.00;M22:Oxidation (M):0.00 | PEAKS DB  |
| N.TLEAAFNAEFNEIRR.V                                           | N    | 28.88  | 1779.8904 | 15     | 3.5  | 890.9556  | 2 | 33.23 | 6        | F6:1696 | OB5956<br>H1<br>Ro.raw | 1.5612E5            | 1        | 1                       | 317   | 331 |                                  |                                                                                                            | PEAKS DB  |
| K.GTGNLE(+53.92)LVAVRK.E                                      | N    | 28.35  | 1309.6440 | 12     | -0.1 | 437.5553  | 3 | 27.29 | 4        | F4:1309 | OB5954<br>H1<br>Ro.raw | 2.3239E4            | 1        | 1                       | 458   | 469 | Replacement of 2 protons by iron | E6:Replacement of 2 protons by iron:60.54                                                                  | PEAKS PTM |
| R.VLLEENAGGEQEERGQRR.W                                        | N    | 28.30  | 2069.0249 | 18     | 1.0  | 518.2640  | 4 | 25.49 | 5        | F5:1205 | OB5955<br>H1<br>Ro.raw | 1.3378E5            | 1        | 1                       | 332   | 349 |                                  |                                                                                                            | PEAKS DB  |
| K.AM(+15.99)VIVVINK(+43.01)GTGNLELVAVR.K                      | Y    | 28.14  | 2154.2195 | 20     | 2.8  | 1078.1200 | 2 | 32.98 | 5        | F5:1664 | OB5955<br>H1<br>Ro.raw | 2.3746E5            | 1        | 1                       | 449   | 468 | Oxidation (M)                    | M2:Oxidation (M):1000.00;K9:Carbamylation:40.94                                                            | PEAKS PTM |
| K.NP(+15.99)QLQDLDMMLTC(+57.02)VEIKEGALMLPHFNSK.A             | N    | 28.11  | 3387.6335 | 29     | 3.2  | 1130.2220 | 3 | 40.44 | 5        | F5:2090 | OB5955<br>H1<br>Ro.raw | 3.3176E4            | 1        | 1                       | 420   | 448 | Carbamidomethylation             | P2:Hydroxylation Pro:14.98;C13:Carbamidomethylation:1000.00                                                | PEAKS DB  |
| R.VLLEENAGGEQEER(+15.99).G                                    | N    | 27.33  | 1587.7375 | 14     | 1.8  | 794.8775  | 2 | 26.70 | 4        | F4:1275 | OB5954<br>H1<br>Ro.raw | 0                   | 0        | 0                       | 332   | 345 |                                  | R14:Oxidation or Hydroxylation:20.88                                                                       | PEAKS PTM |
| K.NPQLQ(+.98)DLDM(+15.99)LTC(+57.02)VEIKEGALMLPHFNSK.A        | N    | 27.25  | 3388.6174 | 29     | 8.0  | 1130.5554 | 3 | 37.44 | 5        | F5:1884 | OB5955<br>H1<br>Ro.raw | 6.7537E6            | 1        | 1                       | 420   | 448 | Carbamidomethylation             | Q5:Deamidation (NQ):0.00;M10:Oxidation (M):12.28;C13:Carbamidomethylation:1000.00                          | PEAKS DB  |

total 184 peptides

| Peptide                                                  | Uniq | -10lgP | Mass      | Length | ppm  | m/z       | z | RT    | Fraction | Scan    | Source File      | Area roasted peanut | #Feature | #Feature roasted peanut | Start | End | PTM                  | AScore                                                                              | Found By  |
|----------------------------------------------------------|------|--------|-----------|--------|------|-----------|---|-------|----------|---------|------------------|---------------------|----------|-------------------------|-------|-----|----------------------|-------------------------------------------------------------------------------------|-----------|
| R.N(+42.01)(+15.00)NPFYFPSRR.F                           | N    | 27.12  | 1353.6465 | 10     | 9.4  | 677.8369  | 2 | 29.74 | 5        | F5:1453 | OB5955 H1 Ro.raw | 3.0438E5            | 1        | 1                       | 172   | 181 |                      | N1:Acetylation (N-term):100.00;N1:Deamidation followed by a methylation:12.28       | PEAKS PTM |
| K.NPQLQDLDMMLTC(+58.01)VEIK.E                            | N    | 26.84  | 2047.9629 | 17     | -3.6 | 1024.9850 | 2 | 46.58 | 4        | F4:2449 | OB5954 H1 Ro.raw | 0                   | 0        | 0                       | 420   | 436 | Carboxymethyl        | C13:Carboxymethyl:1000.00                                                           | PEAKS PTM |
| R.EQEW(+15.99)EEEEEEEEEGSNREVR.R                         | N    | 26.79  | 2681.0483 | 21     | 1.1  | 894.6910  | 3 | 26.92 | 4        | F4:1316 | OB5954 H1 Ro.raw | 7.9753E4            | 1        | 1                       | 478   | 498 | Oxidation (HW)       | W4:Oxidation (HW):1000.00                                                           | PEAKS PTM |
| K.NPQLQDLDM(+15.99)LTC(+57.02)VEIKEGALMLP(+15.99)HFNSK.A | N    | 26.70  | 3403.6284 | 29     | -6.6 | 1702.8102 | 2 | 36.88 | 6        | F6:1908 | OB5956 H1 Ro.raw | 0                   | 0        | 0                       | 420   | 448 | Carbamidomethylation | M10:Oxidation (M):7.65;C13:Carbamidomethylation:1000.00;P24:Hydroxylation Pro:30.14 | PEAKS DB  |
| R.IFLAGDKD(-18.01)NV.V                                   | N    | 26.68  | 1072.5553 | 10     | 0.4  | 537.2852  | 2 | 32.21 | 4        | F4:1610 | OB5954 H1 Ro.raw | 2.1773E6            | 1        | 1                       | 541   | 550 |                      | D8:Dehydration:45.01                                                                | PEAKS PTM |
| R.IVQIEAKPNTLVLP(+13.98)K.H                              | N    | 26.67  | 1675.9872 | 15     | -0.2 | 839.0007  | 2 | 30.09 | 5        | F5:1488 | OB5955 H1 Ro.raw | 7.1099E4            | 1        | 1                       | 214   | 228 |                      | P14:Proline oxidation to pyroglutamic acid:39.25                                    | PEAKS PTM |
| K.KNPQLQDLDM(-48.00)LTC(+57.02)VEIK.E                    | N    | 26.57  | 2127.0703 | 18     | -0.4 | 710.0304  | 3 | 31.57 | 6        | F6:1598 | OB5956 H1 Ro.raw | 1.2455E5            | 1        | 1                       | 419   | 436 | Carbamidomethylation | M11:Dehydration:0.00;C14:Carbamidomethylation:1000.00                               | PEAKS PTM |

total 184 peptides

| Peptide                                                                 | Uniq | -10lgP | Mass      | Length | ppm | m/z       | z | RT    | Fraction | Scan    | Source File            | Area roasted peanut | #Feature | #Feature roasted peanut | Start | End | PTM                                 | AScore                                                                                                                                  | Found By  |
|-------------------------------------------------------------------------|------|--------|-----------|--------|-----|-----------|---|-------|----------|---------|------------------------|---------------------|----------|-------------------------|-------|-----|-------------------------------------|-----------------------------------------------------------------------------------------------------------------------------------------|-----------|
| K.KNPQ(+.98)LQ(+.98)DLDM(+15.99)MLTC(+57.02)VEIKEGALM(+15.99)LPHFNSK.A  | N    | 26.17  | 3533.6914 | 30     | 9.7 | 884.4387  | 4 | 35.77 | 5        | F5:1822 | OB5955<br>H1<br>Ro.raw | 2.4464E5            | 1        | 1                       | 419   | 448 | Carbamidomethylation                | Q4:Deamidation (NQ):9.40;Q6:Deamidation (NQ):6.65;M10:Oxidation (M):0.00;C14:Carbamidomethylation:1000.00;M23:Oxidation (M):40.04       | PEAKS DB  |
| R.IVQIEAKPNT(-18.01)LVLPK.H                                             | N    | 26.13  | 1643.9974 | 15     | 1.4 | 549.0072  | 3 | 30.16 | 6        | F6:1509 | OB5956<br>H1<br>Ro.raw | 2.0726E5            | 1        | 1                       | 214   | 228 | Dehydration                         | T10:Dehydration:100.00                                                                                                                  | PEAKS PTM |
| K.NPQLQ(+.98)DLDM(+15.99)M(+15.99)LTC(+57.02)VEIKEGALM(+15.99)LPHFNSK.A | N    | 26.02  | 3420.6074 | 29     | 5.5 | 1141.2161 | 3 | 34.83 | 5        | F5:1769 | OB5955<br>H1<br>Ro.raw | 2.4925E5            | 1        | 1                       | 420   | 448 | Oxidation (M); Carbamidomethylation | Q5:Deamidation (NQ):11.12;M9:Oxidation (M):1000.00;M10:Oxidation (M):1000.00;C13:Carbamidomethylation:1000.00;M22:Oxidation (M):1000.00 | PEAKS DB  |
| R.DQSSY(+15.99)LQGFSR.N                                                 | N    | 25.52  | 1302.5840 | 11     | 1.6 | 652.3003  | 2 | 29.24 | 6        | F6:1470 | OB5956<br>H1<br>Ro.raw | 7.3464E4            | 1        | 1                       | 305   | 315 |                                     | Y5:Oxidation or Hydroxylation:26.36                                                                                                     | PEAKS PTM |
| total 184 peptides                                                      |      |        |           |        |     |           |   |       |          |         |                        |                     |          |                         |       |     |                                     |                                                                                                                                         |           |

Peptide List

Prepared with PEAKS™ (bioinform.com)

Summary

Ara h 2 GEL BAND RAW

1. Notes

raw Ara h 2 band that contains a lot of Ara h 3 and first 6 the most abundant proteins are some Ara h 2 isoforms. Conglutin Q6PSU2 is on 7 th place.

2. Result Statistics

Figure 1. False discovery rate (FDR) curve. X axis is the number of peptides being kept. Y axis is the corresponding FDR.

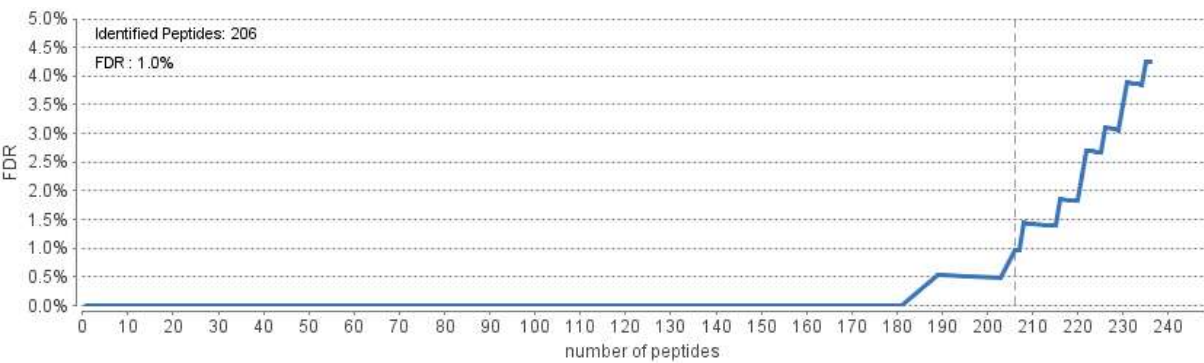

Figure 2. PSM score distribution. (a) Distribution of PEAKS peptide score; (b) Scatterplot of PEAKS peptide score versus precursor mass error.

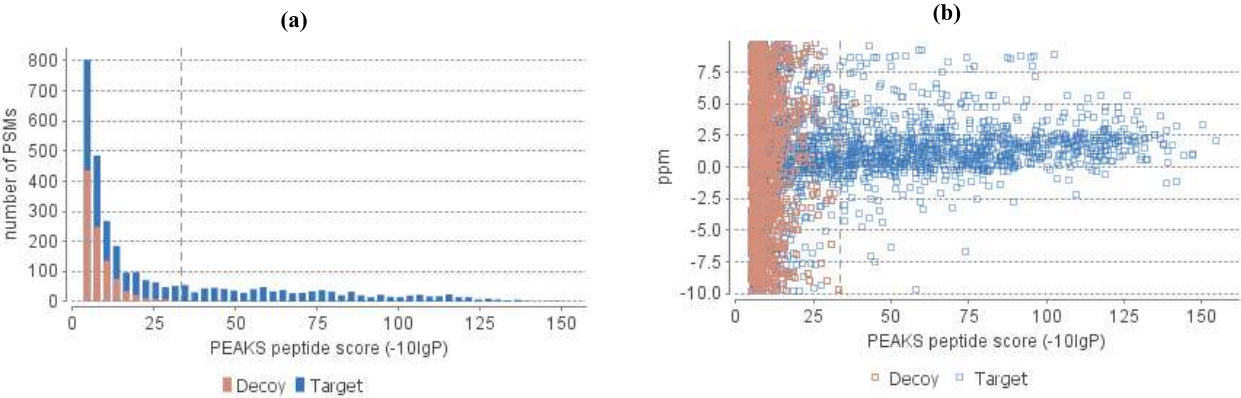

Table 1. Statistics of data.

|  | #Scans | #Features | Identified | #Peptides | #Sequences |
|--|--------|-----------|------------|-----------|------------|
|--|--------|-----------|------------|-----------|------------|

|                |      |       |          |      |       |        |             |     |     | proteins   |    |    |
|----------------|------|-------|----------|------|-------|--------|-------------|-----|-----|------------|----|----|
|                | MS1  | MS/MS | #Chimera |      | #PSMs | #Scans | #Features** |     |     | #Proteins* |    |    |
| Total          | 6768 | 4921  | 666      | 9374 | 944   | 913    | 489         | 206 | 130 | 13         | 20 | 16 |
| Raw<br>Ara h 2 | 6768 | 4921  | 666      | 9374 | 944   | 913    | 489         | 206 | 130 | 13         | 20 | 16 |

\* proteins with significant peptides are used in counts.  
\*\* features are identified by DB search only.

Figure 3. Sample overlap for Proteins and Peptides (up to 8 samples). (a) All Proteins; (b) Top Proteins; (c) Peptides; ?

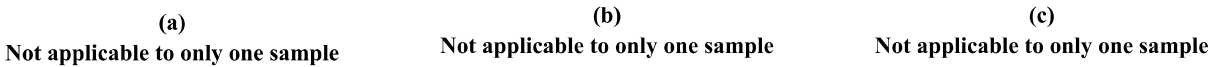

Figure 4. Distribution of peptide feature detection. (a) Feature m/z distribution; (b) Feature RT distribution.

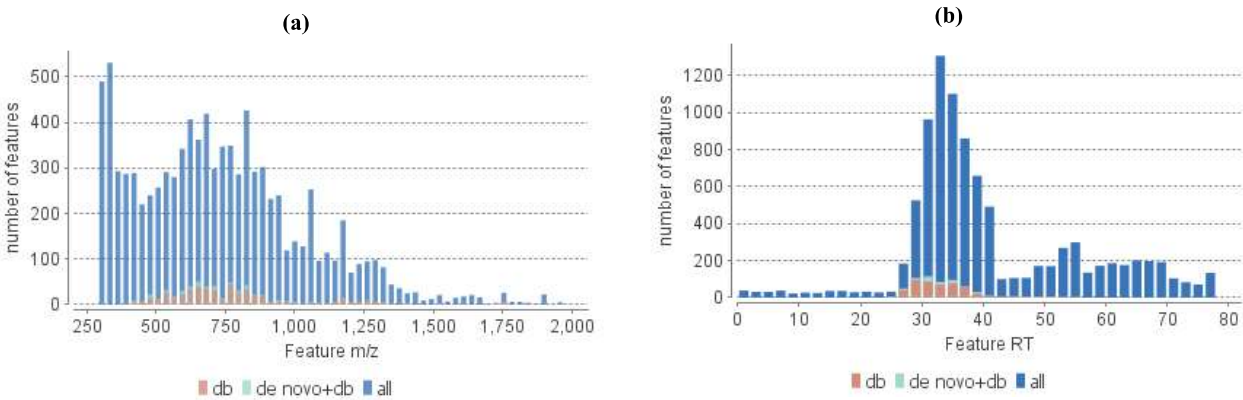

Figure 5. Distribution of identified peptide features. (a) Feature abundance distribution; (b) De novo sequencing validation. ?

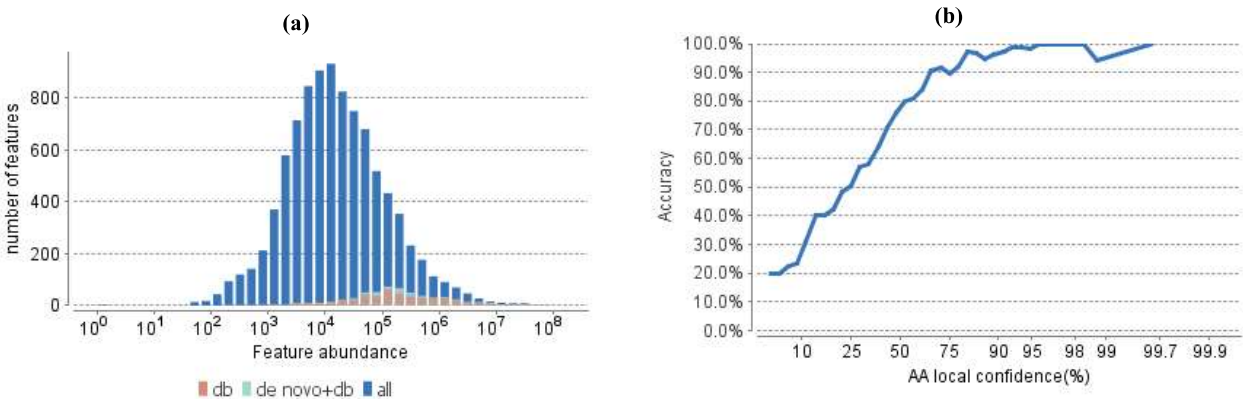

**Table 2.** Result filtration parameters.

|                          |       |
|--------------------------|-------|
| Peptide -10lgP           | ≥33.5 |
| PTM Ascore               | ≥50   |
| Protein -10lgP           | ≥20   |
| Proteins unique peptides | ≥2    |
| De novo score(%)         | ≥50%  |

**Table 3.** Statistics of filtered result.

|                                |      |
|--------------------------------|------|
| FDR (Peptide-Spectrum Matches) | 0.2% |
| FDR (Peptide Sequences)        | 1.0% |
| FDR (Protein Group)            | 0.0% |
| De Novo Only Spectra           | 132  |

**Table 4.** PTM profile.

| Name                | ΔMass  | Position  | #PSM | -10lgP | Abundance | AScore  |
|---------------------|--------|-----------|------|--------|-----------|---------|
| Carbamidomethyl     | 57.02  | C         | 134  | 136.92 | 1.56E6    | 1000.00 |
| Deamidation         | .98    | NQ        | 91   | 154.33 |           | 164.73  |
| Oxidation           | 15.99  | M         | 38   | 130.39 | 3.12E5    | 1000.00 |
| Dimethylation(KR)   | 28.03  | R         | 20   | 123.01 | 3.83E7    | 1000.00 |
| Carbamidomethyl     | 57.02  | EK,N-term | 16   | 77.15  | 8.18E3    | 30.83   |
| Methylation(others) | 14.02  | DH        | 10   | 52.59  | 1.42E5    | 18.00   |
| Propionamide        | 71.04  | C         | 7    | 78.59  | 7.6E4     | 0.00    |
| Cation:Fe[II]       | 53.92  | DE        | 5    | 45.19  | 6.96E4    | 87.12   |
| Ethyl               | 28.03  | D,N-term  | 4    | 74.14  | 2.35E6    | 7.21    |
| Diethylation        | 56.06  | K         | 3    | 40.01  | 1.37E6    | 88.84   |
| Oxidation           | 15.99  | P         | 2    | 55.11  | 4.72E5    | 7.65    |
| Dihydroxy           | 31.99  | W         | 2    | 66.16  | 1.02E5    | 24.67   |
| Phosphorylation     | 79.97  | T         | 2    | 42.79  | 1.27E6    | 71.87   |
| BITC                | 149.03 | K,N-term  | 2    | 44.84  | 1.2E5     | 4.73    |
| Deoxy               | -15.99 | S         | 1    | 48.15  | 4.33E4    | 24.44   |
| Amidine             | 41.03  | N-term    | 1    | 37.87  | 1.3E5     | 1000.00 |
| DehydroalaY         | -94.04 | Y         | 1    | 42.79  | 1.27E6    | 69.38   |
| ethylamino          | 27.05  | S         | 1    | 58.10  | 1.33E5    | 119.64  |
| Ammonia loss        | -17.03 | N-term    | 1    | 42.30  |           | 1000.00 |
| Pyro-glu from Q     | -17.03 | N-term    | 1    | 35.41  | 1.24E4    | 1000.00 |
| Acetylation         | 42.01  | K         | 1    | 39.62  |           | 1000.00 |

proteins

### 3. Experiment Control

**Figure 6.** Precursor mass error of peptide-spectrum matches (PSM) in filtered result. **(a)** Distribution of precursor mass error in ppm; **(b)** Scatterplot of precursor m/z versus precursor mass error in ppm. [?](#)

**(a)**

**(b)**

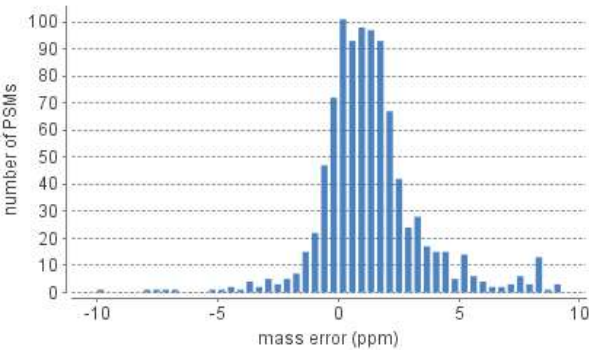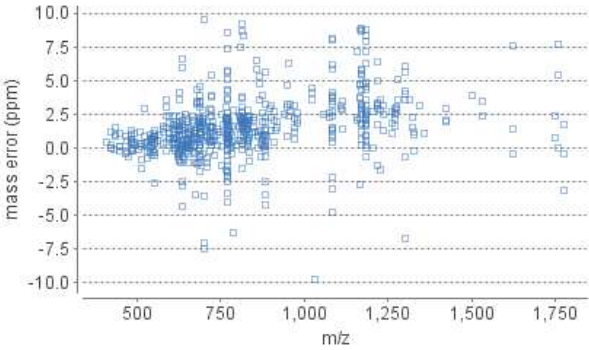

**Table 5.** Number of identified peptides in each sample by the number of missed cleavages.

|                  |     |    |   |   |    |
|------------------|-----|----|---|---|----|
| Missed Cleavages | 0   | 1  | 2 | 3 | 4+ |
| Raw Ara h 2      | 135 | 64 | 7 | 0 | 0  |

4. Other Information

**Table 6.** Search parameters.  
PEAKS Version: PEAKS Studio 10.6 build 20201015  
Search Engine Name: PEAKS  
Parent Mass Error Tolerance: 10.0 ppm  
Fragment Mass Error Tolerance: 0.5 Da  
Precursor Mass Search Type: monoisotopic  
Enzyme: Trypsin  
Max Missed Cleavages: 2  
Digest Mode: Semispecific  
Fixed Modifications:  
  Carbamidomethylation: 57.02  
Variable Modifications:  
  Oxidation (M): 15.99  
  Deamidation (NQ): 0.98  
  Acetylation (K): 42.01  
  Acetylation (Protein N-term): 42.01  
  Acetylation (N-term): 42.01  
  Amidation: -0.98  
  Beta-methylthiolation: 45.99  
  Biotinylation: 226.08  
  and 303 more...  
Max Variable PTM Per Peptide: 5  
Database: Uniprot\_Peanut-3818\_Jul18  
Taxon: All  
Contaminant Database: contam MQ  
Searched Entry: 1723  
FDR Estimation: Enabled  
De novo score(%) threshold: 15  
Peptide hit threshold (-10logP): 30.0

**Table 7.** Instrument parameters.  
Fractions: OB5921 H2 raw.raw, OB5932 H2 raw.raw, OB5933 H2 raw.  
raw  
Ion Source: ESI(nano-spray)  
Fragmentation Mode: CID, CAD(y and b ions)  
MS Scan Mode: FT-ICR/Orbitrap  
MS/MS Scan Mode: FT-ICR/Orbitrap



Peaks run ID: 27  
Merge Options: no merge  
Precursor Options: corrected  
Charge Options: no correction  
Filter m/z: 200.0 - 2000.0  
Filter Charge: 2 - 12  
Process: true  
Associate chimera: yes

Protein List

Protein Accession Contains:  
Protein Description Contains:  
Protein Sample Area >=  
Protein PTM Contains:

| Protein Group     | Protein ID | Accession                             | -10lgP | Coverage (%) | Coverage (%) Raw Ara h 2 | Area Raw Ara h 2 | #Peptides | #Unique | #Spec Raw Ara h 2 | PTM | Avg. Mass | Description                                                                     |
|-------------------|------------|---------------------------------------|--------|--------------|--------------------------|------------------|-----------|---------|-------------------|-----|-----------|---------------------------------------------------------------------------------|
| 1                 | 3          | <a href="#">A1DZF0 A1DZF0_ARAHY</a>   | 434.34 | 33           | 33                       | 3.8197E6         | 17        | 2       | 259               | Y   | 60375     | Arachin 6 OS=Arachis hypogaea OX=3818 PE=2 SV=1                                 |
| 8                 | 1          | <a href="#">Q6IWG5 Q6IWG5_ARAHY</a>   | 415.78 | 35           | 35                       | 2.5322E8         | 17        | 15      | 153               | Y   | 58061     | Glycinin (Fragment) OS=Arachis hypogaea OX=3818 PE=2 SV=1                       |
| 8                 | 2          | <a href="#">Q0GM57 Q0GM57_ARAHY</a>   | 415.78 | 34           | 34                       | 2.5322E8         | 17        | 15      | 153               | Y   | 58263     | Iso-Ara h3 OS=Arachis hypogaea OX=3818 PE=2 SV=1                                |
| 2                 | 5          | <a href="#">Q6T2T4 Q6T2T4_ARAHY</a>   | 415.12 | 32           | 32                       | 6.5207E6         | 15        | 4       | 248               | Y   | 61499     | Storage protein OS=Arachis hypogaea OX=3818 PE=2 SV=1                           |
| 2                 | 6          | <a href="#">Q647H4 Q647H4_ARAHY</a>   | 415.12 | 32           | 32                       | 6.5207E6         | 15        | 4       | 248               | Y   | 61506     | Arachin Ahy-1 OS=Arachis hypogaea OX=3818 PE=2 SV=1                             |
| 7                 | 12         | <a href="#">E9LFE8 E9LFE8_ARAHY</a>   | 399.56 | 55           | 55                       | 1.3004E8         | 15        | 15      | 173               | Y   | 28290     | 11S arachin (Fragment) OS=Arachis hypogaea OX=3818 PE=2 SV=1                    |
| 5                 | 10         | <a href="#">Q9FZ11 Q9FZ11_ARAHY</a>   | 386.55 | 26           | 26                       | 1.9336E6         | 15        | 2       | 176               | Y   | 60449     | Gly1 OS=Arachis hypogaea OX=3818 GN=Gly1 PE=2 SV=1                              |
| 10                | 25         | <a href="#">A1E2B1 A1E2B1_ARAHY</a>   | 360.17 | 53           | 53                       | 2.2172E7         | 13        | 13      | 55                | Y   | 31268     | 11S seed storage globulin B2 OS=Arachis hypogaea OX=3818 PE=2 SV=1              |
| 11                | 8          | <a href="#">sp Q647H2 AHY3_ARAHY</a>  | 342.76 | 30           | 30                       | 1.854E7          | 12        | 10      | 49                | Y   | 54569     | Arachin Ahy-3 OS=Arachis hypogaea OX=3818 PE=1 SV=1                             |
| 15                | 14         | <a href="#">Q647H1 Q647H1_ARAHY</a>   | 245.82 | 10           | 10                       | 8.3606E6         | 5         | 5       | 15                | Y   | 75933     | Conarachin OS=Arachis hypogaea OX=3818 PE=2 SV=1                                |
| 12                | 24         | <a href="#">sp Q6PSU2 CONG7_ARAHY</a> | 235.40 | 48           | 48                       | 7.5984E6         | 8         | 8       | 39                | Y   | 20114     | Conglutin-7 OS=Arachis hypogaea OX=3818 PE=1 SV=2                               |
| 17                | 27         | <a href="#">A5Z1R0 A5Z1R0_ARAHY</a>   | 165.46 | 18           | 18                       | 2.8784E5         | 2         | 2       | 6                 | Y   | 16920     | Ara h 6 allergen OS=Arachis hypogaea OX=3818 GN=Ara h 6 PE=4 SV=1               |
| 17                | 28         | <a href="#">sp Q647G9 CONG_ARAHY</a>  | 165.46 | 18           | 18                       | 2.8784E5         | 2         | 2       | 6                 | Y   | 16920     | Conglutin OS=Arachis hypogaea OX=3818 PE=1 SV=1                                 |
| 18                | 415        | <a href="#">N1NJN8 N1NJN8_ARAHY</a>   | 127.73 | 16           | 16                       | 3.5194E5         | 3         | 3       | 4                 | Y   | 23506     | Proteasome subunit OS=Arachis hypogaea OX=3818 GN=ARAX_AHF417E0 7-015 PE=4 SV=1 |
| 16                | 29         | <a href="#">#CONTAM#P00761</a>        | 109.64 | 15           | 15                       | 3.7364E5         | 3         | 3       | 13                | N   | 24409     | SWISS-PROT: #CONTAM#P00761 TRYP_PIG Trypsin - Sus scrofa (Pig).                 |
| 19                | 421        | <a href="#">Q1PCR5 Q1PCR5_ARAHY</a>   | 93.41  | 13           | 13                       | 9.4732E4         | 2         | 2       | 3                 | N   | 24047     | 20S proteasome beta subunit (Fragment) OS=Arachis hypogaea OX=3818 PE=2 SV=1    |
| total 16 proteins |            |                                       |        |              |                          |                  |           |         |                   |     |           |                                                                                 |

A1DZF0|A1DZF0\_ARAHY

[back to list](#)

| [Protein Coverage](#) | [Supporting Peptides](#) |

Protein Coverage:

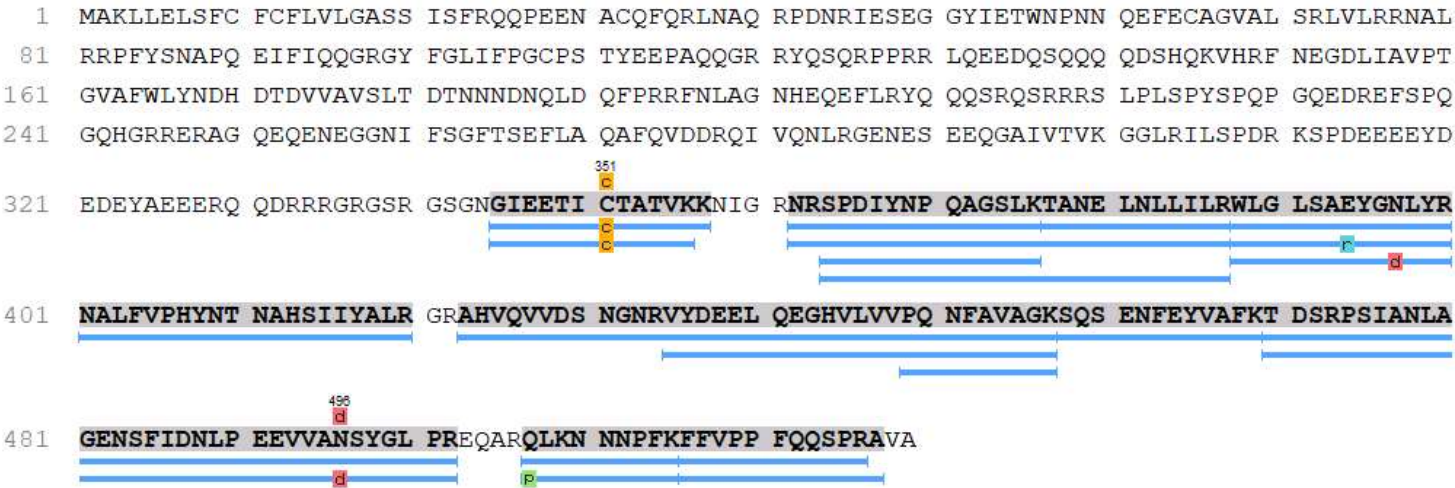

Carbamidomethylation (+57.02)  
Deamidation (NQ) (+0.98)  
Pyro-glu from Q (-17.03)  
Replacement of 2 protons by iron (+53.92)

Supporting Peptides:

| Peptide                                    | Uniq | -10lgP | Mass      | Length | ppm | m/z       | z | RT    | Fraction | Scan    | Source File       | Area Raw Ara h 2 | #Feature | #Feature Raw Ara h 2 | Start | End | PTM                  | AScore                          | Found By |
|--------------------------------------------|------|--------|-----------|--------|-----|-----------|---|-------|----------|---------|-------------------|------------------|----------|----------------------|-------|-----|----------------------|---------------------------------|----------|
| K.TDSRPSIANLAGENSFIDNLPEEVVANSYGLPR.E      | N    | 147.12 | 3544.7434 | 33     | 1.0 | 1182.5896 | 3 | 37.44 | 2        | F2:1890 | OB5932 H2 raw.raw | 1.1607E8         | 11       | 11                   | 470   | 502 |                      |                                 | PEAKS DB |
| R.SPDIYNPQAGSLKTANELNLLILR.W               | N    | 144.08 | 2639.4282 | 24     | 0.9 | 880.8175  | 3 | 35.79 | 2        | F2:1765 | OB5932 H2 raw.raw | 1.8094E6         | 3        | 3                    | 364   | 387 |                      |                                 | PEAKS DB |
| R.WGLSAEYGNLYR.N                           | N    | 135.04 | 1540.7673 | 13     | 2.6 | 771.3929  | 2 | 34.80 | 1        | F1:1640 | OB5921 H2 raw.raw | 3.956E7          | 16       | 15                   | 388   | 400 |                      |                                 | PEAKS DB |
| R.NALFVPHYNTNAHSIIYALR.G                   | N    | 133.14 | 2313.2019 | 20     | 2.3 | 1157.6108 | 2 | 33.37 | 2        | F2:1607 | OB5932 H2 raw.raw | 3.0446E7         | 14       | 13                   | 401   | 420 |                      |                                 | PEAKS DB |
| K.SQSENFEYVAFK.T                           | N    | 122.47 | 1447.6619 | 12     | 2.4 | 724.8400  | 2 | 31.43 | 1        | F1:1392 | OB5921 H2 raw.raw | 1.027E7          | 4        | 4                    | 458   | 469 |                      |                                 | PEAKS DB |
| R.VYDEELQEGHVLVVPQNFAVAGK.S                | N    | 118.55 | 2540.2910 | 23     | 2.1 | 847.7727  | 3 | 32.93 | 1        | F1:1498 | OB5921 H2 raw.raw | 1.5993E6         | 6        | 6                    | 435   | 457 |                      |                                 | PEAKS DB |
| K.FFVPPFQQSPR.A                            | Y    | 117.36 | 1348.6927 | 11     | 1.2 | 675.3545  | 2 | 33.11 | 1        | F1:1496 | OB5921 H2 raw.raw | 2.8823E6         | 3        | 3                    | 516   | 526 |                      |                                 | PEAKS DB |
| R.NRSPDIYNPQAGSLK.T                        | N    | 115.99 | 1658.8376 | 15     | 0.4 | 830.4265  | 2 | 27.80 | 2        | F2:1285 | OB5932 H2 raw.raw | 8.3597E5         | 6        | 6                    | 362   | 376 |                      |                                 | PEAKS DB |
| K.TDSRPSIANLAGENSFIDNLPEEVAN(+.98)SYGLPR.E | N    | 110.77 | 3545.7273 | 33     | 0.2 | 1182.9166 | 3 | 36.74 | 2        | F2:1825 | OB5932 H2 raw.raw | 7.8948E3         | 1        | 1                    | 470   | 502 | Deamidation (NQ)     | N27:Deamidation (NQ):18.18      | PEAKS DB |
| R.SPDIYNPQAGSLK.T                          | N    | 106.60 | 1388.6936 | 13     | 1.9 | 695.3554  | 2 | 28.54 | 3        | F3:1354 | OB5933 H2 raw.raw | 1.3705E6         | 3        | 3                    | 364   | 376 |                      |                                 | PEAKS DB |
| N.GIEETIC(+57.02)TATVK.K                   | N    | 103.68 | 1320.6595 | 12     | 0.2 | 661.3372  | 2 | 29.46 | 3        | F3:1405 | OB5933 H2 raw.raw | 2.7846E5         | 3        | 3                    | 345   | 356 | Carbamidomethylation | C7:Carbamidomethylation:1000.00 | PEAKS DB |

total 29 peptides

| Peptide                                     | Uniq | ~10lgP | Mass      | Length | ppm  | m/z       | z | RT    | Fraction | Scan    | Source File       | Area Raw Area h 2 | #Feature | #Feature Raw Area h 2 | Start | End | PTM                              | AScore                                                                          | Found By  |
|---------------------------------------------|------|--------|-----------|--------|------|-----------|---|-------|----------|---------|-------------------|-------------------|----------|-----------------------|-------|-----|----------------------------------|---------------------------------------------------------------------------------|-----------|
| N.GIEETIC(+57.02)TATVKK.N                   | N    | 87.79  | 1448.7545 | 13     | 0.2  | 725.3847  | 2 | 27.80 | 2        | F2:1296 | OB5932 H2 raw.raw | 5.8408E5          | 5        | 5                     | 345   | 357 | Carbamidomethylation             | C7:Carbamidomethylation:1000.00                                                 | PEAKS DB  |
| R.AHVQVVDSSNGNRVYDEELQEGHVLVVPQNFAVAGK.S    | N    | 86.70  | 3816.9182 | 35     | 2.8  | 1273.3169 | 3 | 32.06 | 3        | F3:1574 | OB5933 H2 raw.raw | 3.9867E6          | 2        | 2                     | 423   | 457 |                                  |                                                                                 | PEAKS DB  |
| K.FFVPPFQQSPRA.V                            | Y    | 85.28  | 1419.7299 | 12     | 0.8  | 710.8728  | 2 | 33.11 | 1        | F1:1502 | OB5921 H2 raw.raw | 4.6593E5          | 3        | 3                     | 516   | 527 |                                  |                                                                                 | PEAKS DB  |
| K.TANELNLLILR.W                             | N    | 82.01  | 1268.7452 | 11     | 0.7  | 635.3803  | 2 | 34.98 | 1        | F1:1608 | OB5921 H2 raw.raw | 2.5833E7          | 5        | 5                     | 377   | 387 |                                  |                                                                                 | PEAKS DB  |
| R.S(+57.02)PDIYNPQAGSLK.T                   | N    | 77.15  | 1445.7150 | 13     | 5.4  | 723.8687  | 2 | 28.54 | 3        | F3:1379 | OB5933 H2 raw.raw | 8.1843E3          | 1        | 1                     | 364   | 376 |                                  | S1:Carbamidomethylation (DHKE, X@N-term):30.83                                  | PEAKS PTM |
| V.PQNFAVAGK.S                               | N    | 71.84  | 930.4923  | 9      | 0.8  | 466.2538  | 2 | 32.44 | 2        | F2:1562 | OB5932 H2 raw.raw | 4.3278E6          | 2        | 2                     | 449   | 457 |                                  |                                                                                 | PEAKS DB  |
| R.NRSPDIYNPQAGSLKTANELNLLILR.W              | N    | 64.74  | 2909.5723 | 26     | 1.5  | 970.8661  | 3 | 34.50 | 2        | F2:1698 | OB5932 H2 raw.raw | 6.2575E4          | 1        | 1                     | 362   | 387 |                                  |                                                                                 | PEAKS DB  |
| K.FFVPPFQQSP(+15.99)R.A                     | Y    | 55.11  | 1364.6876 | 11     | 0.7  | 683.3516  | 2 | 32.74 | 1        | F1:1483 | OB5921 H2 raw.raw | 4.7156E5          | 1        | 1                     | 516   | 526 |                                  | P10:Oxidation or Hydroxylation:7.65                                             | PEAKS PTM |
| R.NALFVPH(+14.02)YNTNAHSIIYALR.G            | N    | 52.59  | 2327.2175 | 20     | 0.3  | 776.7467  | 3 | 35.36 | 1        | F1:1633 | OB5921 H2 raw.raw | 1.4175E5          | 1        | 1                     | 401   | 420 |                                  | H7:Methylation(others):18.00                                                    | PEAKS PTM |
| K.TDSRPSIANLAGEN(+.98)SFIDNLPEEVVANSYGLPR.E | N    | 46.28  | 3545.7273 | 33     | 6.3  | 1182.9238 | 3 | 48.72 | 1        | F1:2418 | OB5921 H2 raw.raw | 9.731E3           | 2        | 2                     | 470   | 502 |                                  | N14:Deamidation (NQ):29.85                                                      | PEAKS DB  |
| R.QLKNNNPFK.F                               | N    | 45.67  | 1101.5930 | 9      | -0.6 | 551.8035  | 2 | 27.25 | 3        | F3:1282 | OB5933 H2 raw.raw | 1.2465E4          | 2        | 2                     | 507   | 515 |                                  |                                                                                 | PEAKS DB  |
| R.WLGLSAE(+53.92)YGNLYR.N                   | N    | 45.19  | 1594.6866 | 13     | 0.4  | 532.5697  | 3 | 34.87 | 2        | F2:1718 | OB5932 H2 raw.raw | 1.8492E5          | 2        | 2                     | 388   | 400 | Replacement of 2 protons by iron | E7:Replacement of 2 protons by iron:156.85                                      | PEAKS PTM |
| N.G(+57.02)IEETIC(+57.02)TATVK.K            | N    | 44.11  | 1377.6809 | 12     | 0.2  | 689.8479  | 2 | 29.76 | 1        | F1:1306 | OB5921 H2 raw.raw | 0                 | 0        | 0                     | 345   | 356 | Carbamidomethylation             | G1:Carbamidomethylation (DHKE, X@N-term):5.03; C7:Carbamidomethylation:1000.00  | PEAKS PTM |
| R.N(+.98)ALFVPHYNTNAHSIIYALR.G              | N    | 41.98  | 2314.1858 | 20     | 3.6  | 772.4053  | 3 | 45.28 | 3        | F3:2182 | OB5933 H2 raw.raw | 6.3088E4          | 1        | 1                     | 401   | 420 |                                  | N1:Deamidation (NQ):32.94                                                       | PEAKS DB  |
| N.G(+57.02)IEETIC(+57.02)TATVKK.N           | N    | 37.32  | 1505.7759 | 13     | 2.5  | 753.8971  | 2 | 28.15 | 1        | F1:1210 | OB5921 H2 raw.raw | 1.685E4           | 1        | 1                     | 345   | 357 | Carbamidomethylation             | G1:Carbamidomethylation (DHKE, X@N-term):26.31; C7:Carbamidomethylation:1000.00 | PEAKS PTM |
| R.WLGLSAEYGN(+.98)LYR.N                     | N    | 36.96  | 1541.7513 | 13     | 7.3  | 771.8886  | 2 | 52.84 | 1        | F1:2630 | OB5921 H2 raw.raw | 0                 | 0        | 0                     | 388   | 400 | Deamidation (NQ)                 | N10:Deamidation (NQ):1000.00                                                    | PEAKS DB  |
| K.SQSE(+53.92)NFEYVAFK.T                    | N    | 36.67  | 1501.5812 | 12     | -1.3 | 751.7969  | 2 | 31.69 | 2        | F2:1525 | OB5932 H2 raw.raw | 2.6345E5          | 1        | 1                     | 458   | 469 |                                  | E4:Replacement of 2 protons by iron:32.69                                       | PEAKS PTM |
| R.Q(-17.03)LKNNNPFK.F                       | N    | 35.41  | 1084.5665 | 9      | 0.4  | 543.2908  | 2 | 28.36 | 3        | F3:1357 | OB5933 H2 raw.raw | 1.237E4           | 1        | 1                     | 507   | 515 | Pyro-glu from Q                  | Q1:Pyro-glu from Q:1000.00                                                      | PEAKS PTM |
| total 29 peptides                           |      |        |           |        |      |           |   |       |          |         |                   |                   |          |                       |       |     |                                  |                                                                                 |           |

Protein Coverage:

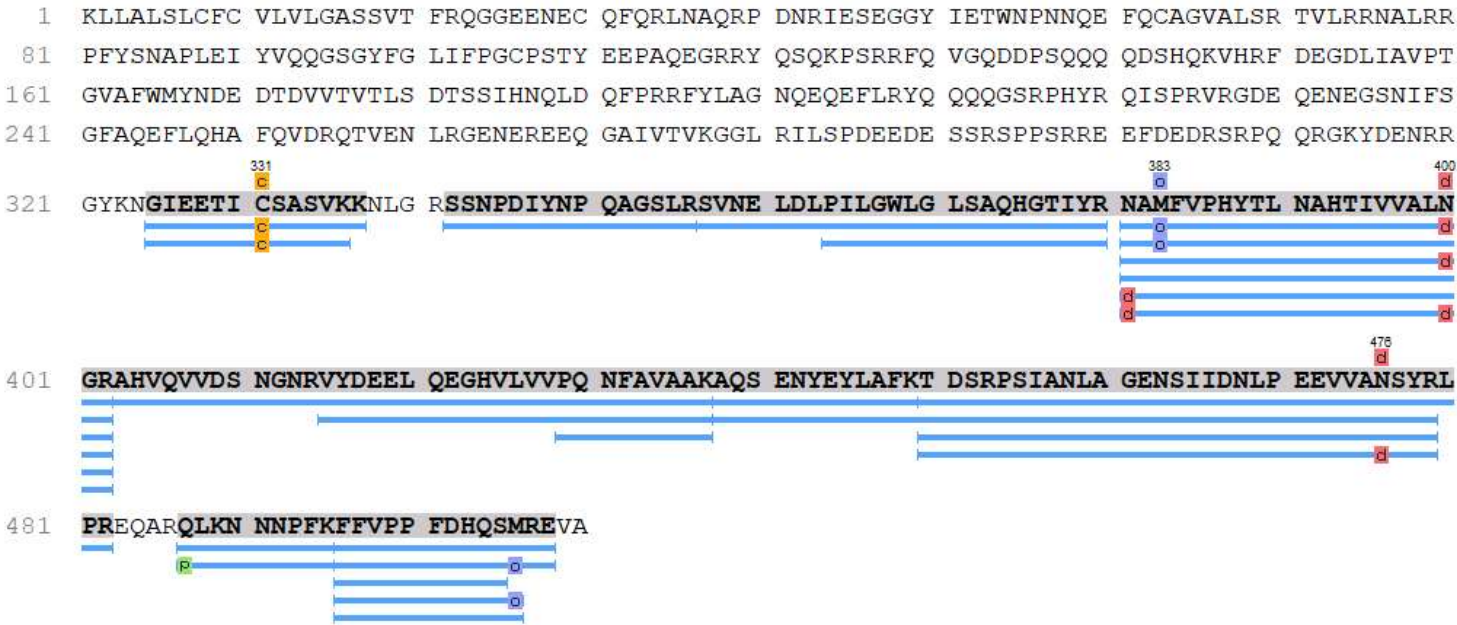

Carbamidomethylation (+57.02)  
Deamidation (NQ) (+0.98)  
Oxidation (M) (+15.99)  
Pyro-glu from Q (-17.03)

Supporting Peptides:

| Peptide                                  | Uniq | -10lgP | Mass      | Length | ppm | m/z       | z | RT    | Fraction | Scan    | Source File       | Area Raw Ara h 2 | #Feature | #Feature Raw Ara h 2 | Start | End | PTM              | AScore                      | Found By |
|------------------------------------------|------|--------|-----------|--------|-----|-----------|---|-------|----------|---------|-------------------|------------------|----------|----------------------|-------|-----|------------------|-----------------------------|----------|
| R.NAMFVPHYTLNAHTIVVALN(+.98)GR.A         | Y    | 154.33 | 2438.2529 | 22     | 2.1 | 813.7599  | 3 | 33.95 | 3        | F3:1683 | OB5933 H2 raw.raw | 5.0871E6         | 4        | 4                    | 381   | 402 | Deamidation (NQ) | N20:Deamidation (NQ):218,32 | PEAKS DB |
| R.SVNELDLPILGWLGLSAQHGTIYR.N             | Y    | 147.15 | 2651.4070 | 24     | 1.0 | 1326.7120 | 2 | 39.90 | 1        | F1:1894 | OB5921 H2 raw.raw | 6.1669E7         | 7        | 7                    | 357   | 380 |                  |                             | PEAKS DB |
| R.NAMFVPHYTLNAHTIVVALNNGR.A              | Y    | 140.28 | 2437.2688 | 22     | 1.7 | 1219.6438 | 2 | 35.24 | 2        | F2:1717 | OB5932 H2 raw.raw | 1.1969E7         | 6        | 6                    | 381   | 402 |                  |                             | PEAKS DB |
| K.TDSRPSIANLAGENSIIDNLPEEVVANSYR.L       | Y    | 128.13 | 3243.6006 | 30     | 3.7 | 1082.2114 | 3 | 36.34 | 2        | F2:1837 | OB5932 H2 raw.raw | 1.7742E7         | 6        | 6                    | 450   | 479 |                  |                             | PEAKS DB |
| K.TDSRPSIANLAGENSIIDNLPEEVVAN(+.98)SYR.L | Y    | 123.94 | 3244.5847 | 30     | 3.8 | 1082.5397 | 3 | 35.65 | 2        | F2:1760 | OB5932 H2 raw.raw | 0                | 0        | 0                    | 450   | 479 | Deamidation (NQ) | N27:Deamidation (NQ):81,59  | PEAKS DB |
| K.AQSENYEYLAFT.T                         | Y    | 123.69 | 1461.6776 | 12     | 0.8 | 731.8467  | 2 | 31.43 | 1        | F1:1390 | OB5921 H2 raw.raw | 5.3867E6         | 3        | 3                    | 438   | 449 |                  |                             | PEAKS DB |
| R.NAM(+15.99)FVPHYTLNAHTIVVALNNGR.A      | Y    | 121.47 | 2453.2637 | 22     | 2.2 | 818.7636  | 3 | 33.56 | 3        | F3:1651 | OB5933 H2 raw.raw | 1.2362E6         | 2        | 2                    | 381   | 402 | Oxidation (M)    | M3:Oxidation (M):1000.00    | PEAKS DB |
| R.SSNPDIYNPQAGSLR.S                      | Y    | 121.43 | 1617.7747 | 15     | 0.5 | 809.8950  | 2 | 28.51 | 1        | F1:1221 | OB5921 H2 raw.raw | 1.8561E6         | 3        | 3                    | 342   | 356 |                  |                             | PEAKS DB |

total 35 peptides

| Peptide                                        | Uniq | -10lgP | Mass      | Length | ppm | m/z       | z | RT    | Fraction | Scan    | Source File       | Area Raw Area 2 | #Feature | #Feature Raw Area 2 | Start | End | PTM                             | AScore                                                                        | Found By  |
|------------------------------------------------|------|--------|-----------|--------|-----|-----------|---|-------|----------|---------|-------------------|-----------------|----------|---------------------|-------|-----|---------------------------------|-------------------------------------------------------------------------------|-----------|
| R.N(+.98)AMFVPHYTLNAHTIVVALNGR.A               | Y    | 118.49 | 2438.2529 | 22     | 2.9 | 1220.1373 | 2 | 34.78 | 2        | F2:1708 | OB5932 H2 raw.raw | 0               | 0        | 0                   | 381   | 402 | Deamidation (NQ)                | N1:Deamidation (NQ):79.74                                                     | PEAKS DB  |
| L.PILGWLGLSAQHGTIYR.N                          | Y    | 111.93 | 1881.0261 | 17     | 2.5 | 941.5227  | 2 | 39.89 | 3        | F3:2036 | OB5933 H2 raw.raw | 1.5582E5        | 1        | 1                   | 364   | 380 |                                 |                                                                               | PEAKS DB  |
| R.NAM(+15.99)FVPHYTLNAHTIVVALN(+.98)GR.A       | Y    | 110.86 | 2454.2478 | 22     | 2.8 | 1228.1346 | 2 | 32.81 | 3        | F3:1623 | OB5933 H2 raw.raw | 1.7713E6        | 6        | 6                   | 381   | 402 | Oxidation (M); Deamidation (NQ) | M3:Oxidation (M):1000.00;N2 0:Deamidation (NQ):123.21                         | PEAKS DB  |
| R.AHVQVVDSN(+.98)GNRVYDEELQEGHVLVVPQNFAVA.A    | Y    | 98.59  | 3831.9180 | 35     | 3.6 | 1278.3179 | 3 | 32.25 | 3        | F3:1584 | OB5933 H2 raw.raw | 9.4081E6        | 2        | 2                   | 403   | 437 |                                 | N9:Deamidation (NQ):9.40                                                      | PEAKS DB  |
| N.GIEETIC(+57.02)SASVK.K                       | Y    | 95.93  | 1292.6282 | 12     | 2.2 | 647.3228  | 2 | 29.07 | 1        | F1:1261 | OB5921 H2 raw.raw | 1.1569E5        | 3        | 3                   | 325   | 336 | Carbamidomethylation            | C7:Carbamidomethylation:1000.00                                               | PEAKS DB  |
| K.TDSRPSIANLAGEN(+.98)SIIDNLPEEVVANSYR.L       | Y    | 95.61  | 3244.5847 | 30     | 8.0 | 1082.5442 | 3 | 36.12 | 3        | F3:1826 | OB5933 H2 raw.raw | 5.3609E7        | 2        | 2                   | 450   | 479 |                                 | N14:Deamidation (NQ):31.31                                                    | PEAKS DB  |
| R.N(+.98)AMFVPHYTLNAHTIVVALN(+.98)GR.A         | Y    | 87.68  | 2439.2368 | 22     | 8.7 | 814.0933  | 3 | 34.13 | 3        | F3:1683 | OB5933 H2 raw.raw | 4.359E6         | 1        | 1                   | 381   | 402 | Deamidation (NQ)                | N1:Deamidation (NQ):53.47;N2 0:Deamidation (NQ):61.12                         | PEAKS DB  |
| K.FFVPPFDHQMRE.V                               | Y    | 82.77  | 1635.7504 | 13     | 1.4 | 818.8836  | 2 | 32.55 | 1        | F1:1469 | OB5921 H2 raw.raw | 1.5304E6        | 4        | 4                   | 496   | 508 |                                 |                                                                               | PEAKS DB  |
| R.NAMFVPHYTLN(+.98)AHTIVVALNGR.A               | Y    | 81.31  | 2438.2529 | 22     | 3.7 | 813.7613  | 3 | 35.31 | 1        | F1:1635 | OB5921 H2 raw.raw | 0               | 0        | 0                   | 381   | 402 |                                 | N11:Deamidation (NQ):33.51                                                    | PEAKS DB  |
| R.VYDEELQEGHVLVVPQNFAVA.A                      | Y    | 74.42  | 2554.3066 | 23     | 1.2 | 852.4438  | 3 | 33.17 | 1        | F1:1510 | OB5921 H2 raw.raw | 0               | 0        | 0                   | 415   | 437 |                                 |                                                                               | PEAKS DB  |
| R.SVNE(+57.02)LDLPILGWLGLSAQHGTIYR.N           | Y    | 72.38  | 2708.4285 | 24     | 1.0 | 1355.2229 | 2 | 40.09 | 2        | F2:2024 | OB5932 H2 raw.raw | 1.9952E5        | 1        | 1                   | 357   | 380 |                                 | E4:Carbamidomethylation (DHKE, X@N-term):5.03                                 | PEAKS PTM |
| N.GIEETIC(+57.02)SASVKK.N                      | Y    | 70.24  | 1420.7231 | 13     | 0.8 | 711.3694  | 2 | 27.44 | 2        | F2:1263 | OB5932 H2 raw.raw | 3.7518E5        | 3        | 3                   | 325   | 337 | Carbamidomethylation            | C7:Carbamidomethylation:1000.00                                               | PEAKS DB  |
| K.TDSRPSIANLAGENSIIIDNLPEEVVANSYRLPR.E         | Y    | 68.47  | 3609.8386 | 33     | 2.2 | 903.4689  | 4 | 36.12 | 3        | F3:1817 | OB5933 H2 raw.raw | 2.0614E7        | 5        | 5                   | 450   | 482 |                                 |                                                                               | PEAKS DB  |
| R.N(+.98)AM(+15.99)FVPHYTLNAHTIVVALN(+.98)GR.A | Y    | 68.22  | 2455.2317 | 22     | 8.4 | 819.4247  | 3 | 34.50 | 2        | F2:1707 | OB5932 H2 raw.raw | 1.9858E5        | 1        | 1                   | 381   | 402 | Oxidation (M)                   | N1:Deamidation (NQ):27.37;M3:Oxidation (M):1000.00;N20:Deamidation (NQ):39.72 | PEAKS DB  |
| R.SVNELDLPILGW(+31.99)LGLSAQHGTIYR.N           | Y    | 66.16  | 2683.3970 | 24     | 3.1 | 1342.7100 | 2 | 38.93 | 3        | F3:1986 | OB5933 H2 raw.raw | 6.9221E5        | 2        | 2                   | 357   | 380 |                                 | W12:Dihydroxy:33.65                                                           | PEAKS PTM |
| K.FFVPPFDHQS.M                                 | Y    | 63.99  | 1219.5662 | 10     | 0.3 | 610.7905  | 2 | 33.29 | 1        | F1:1544 | OB5921 H2 raw.raw | 2.015E5         | 1        | 1                   | 496   | 505 |                                 |                                                                               | PEAKS DB  |
| R.N(+.98)AMFVPHYTLN(+.98)AHTIVVALNGR.A         | Y    | 59.69  | 2439.2368 | 22     | 9.3 | 814.0938  | 3 | 35.76 | 3        | F3:1773 | OB5933 H2 raw.raw | 7.1072E5        | 1        | 1                   | 381   | 402 |                                 | N1:Deamidation (NQ):40.15;N1 1:Deamidation (NQ):28.29                         | PEAKS DB  |
| V.PQNFAVA.A                                    | N    | 51.53  | 944.5079  | 9      | 0.5 | 473.2615  | 2 | 32.25 | 3        | F3:1586 | OB5933 H2 raw.raw | 2.3208E6        | 2        | 2                   | 429   | 437 |                                 |                                                                               | PEAKS DB  |
| total 35 peptides                              |      |        |           |        |     |           |   |       |          |         |                   |                 |          |                     |       |     |                                 |                                                                               |           |

| Peptide                                               | Uniq | -10lgP | Mass      | Length | ppm  | m/z       | z | RT    | Fraction | Scan    | Source File       | Area Raw Area 2 | #Feature | #Feature Raw Area 2 | Start | End | PTM             | AScore                     | Found By  |
|-------------------------------------------------------|------|--------|-----------|--------|------|-----------|---|-------|----------|---------|-------------------|-----------------|----------|---------------------|-------|-----|-----------------|----------------------------|-----------|
| K.TDSRPSIANLAGENSIIDN(+.98)LPEEVVANSYR.L              | Y    | 49.89  | 3244.5847 | 30     | 8.0  | 1082.5442 | 3 | 36.12 | 3        | F3:1810 | OB5933 H2 raw.raw | 5.3512E7        | 1        | 1                   | 450   | 479 |                 | N19:Deamidation (NQ):6.49  | PEAKS DB  |
| R.AHVQVVDSENGN(+.98)RVYDEELQEGHVLVVPQNFVAFAAK.A       | Y    | 49.15  | 3831.9180 | 35     | 1.8  | 767.3923  | 5 | 32.25 | 3        | F3:1589 | OB5933 H2 raw.raw | 2.7476E5        | 1        | 1                   | 403   | 437 |                 | N11:Deamidation (NQ):0.00  | PEAKS DB  |
| R.QLKNNNPFK.F                                         | N    | 45.67  | 1101.5930 | 9      | -0.6 | 551.8035  | 2 | 27.25 | 3        | F3:1282 | OB5933 H2 raw.raw | 1.2465E4        | 2        | 2                   | 487   | 495 |                 |                            | PEAKS DB  |
| K.FFVPPFDHQSM(+15.99).R                               | Y    | 44.78  | 1366.6016 | 11     | -0.2 | 684.3079  | 2 | 33.49 | 1        | F1:1527 | OB5921 H2 raw.raw | 4.1366E4        | 1        | 1                   | 496   | 506 | Oxidation (M)   | M11:Oxidation (M):1000.00  | PEAKS DB  |
| K.FFVPPFDHQSM.R                                       | Y    | 42.50  | 1350.6067 | 11     | -0.5 | 676.3103  | 2 | 34.43 | 1        | F1:1571 | OB5921 H2 raw.raw | 4.9902E4        | 1        | 1                   | 496   | 506 |                 |                            | PEAKS DB  |
| K.FFVPPFDHQSM(+15.99)RE.V                             | Y    | 37.46  | 1651.7452 | 13     | 0.6  | 551.5894  | 3 | 31.99 | 1        | F1:1457 | OB5921 H2 raw.raw | 2.1439E5        | 1        | 1                   | 496   | 508 | Oxidation (M)   | M11:Oxidation (M):1000.00  | PEAKS DB  |
| R.Q(-17.03)LKNNNPFK.F                                 | N    | 35.41  | 1084.5665 | 9      | 0.4  | 543.2908  | 2 | 28.36 | 3        | F3:1357 | OB5933 H2 raw.raw | 1.237E4         | 1        | 1                   | 487   | 495 | Pyro-glu from Q | Q1:Pyro-glu from Q:1000.00 | PEAKS PTM |
| R.AHVQ(+.98)VVDSENGNRVYDEELQEGHVLVVPQNFVAFAAK.A       | Y    | 35.00  | 3831.9180 | 35     | 2.1  | 767.3925  | 5 | 32.58 | 2        | F2:1579 | OB5932 H2 raw.raw | 0               | 0        | 0                   | 403   | 437 |                 | Q4:Deamidation (NQ):0.00   | PEAKS DB  |
| K.AQSENYEYLAFKTDPSRPSIANLAGEN(+.98)SIIDNLPEEVVANSYR.L | Y    | 34.68  | 4688.2515 | 42     | 4.7  | 1173.0757 | 4 | 36.70 | 2        | F2:1816 | OB5932 H2 raw.raw | 2.4176E5        | 1        | 1                   | 438   | 479 |                 | N26:Deamidation (NQ):0.00  | PEAKS DB  |
| total 35 peptides                                     |      |        |           |        |      |           |   |       |          |         |                   |                 |          |                     |       |     |                 |                            |           |



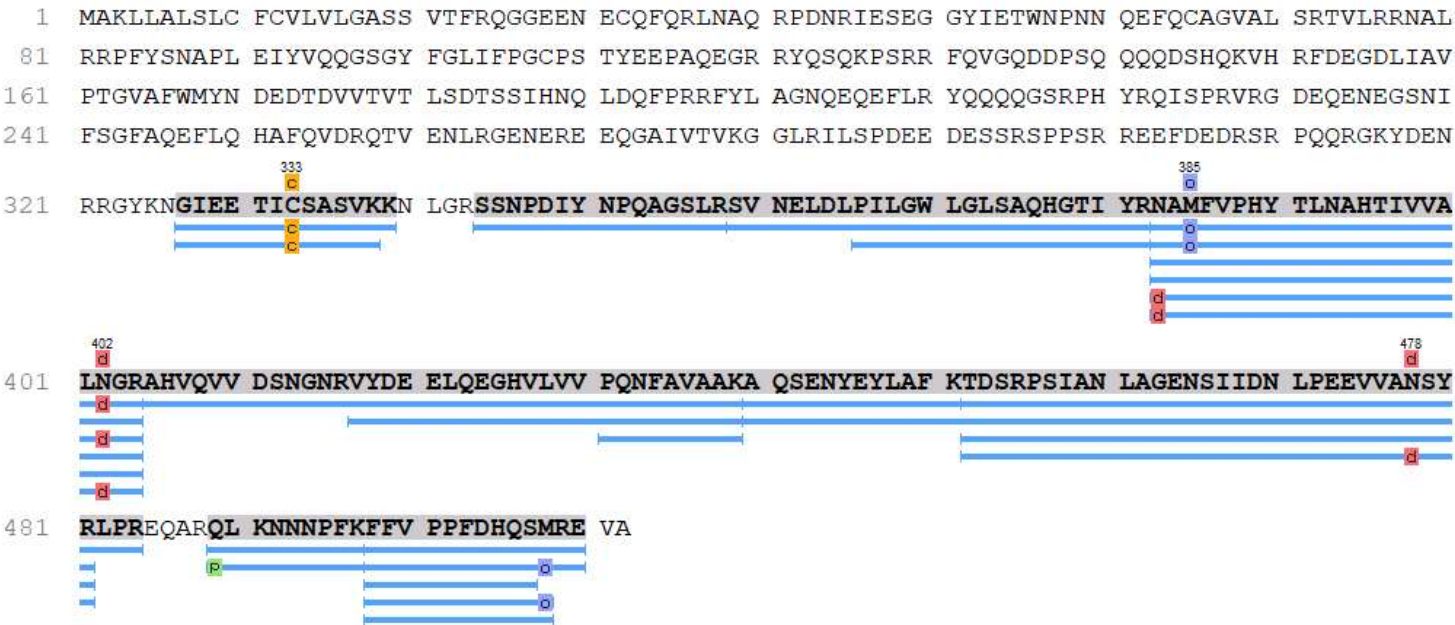

Carbamidomethylation (+57.02)  
Deamidation (NQ) (+0.98)  
Oxidation (M) (+15.99)  
Pyro-glu from Q (-17.03)

Supporting Peptides:

| Peptide                                  | Uniq | -10lgP | Mass      | Length | ppm | m/z       | z | RT    | Fraction | Scan    | Source File       | Area Raw Area 2 | #Feature | #Feature Raw Area 2 | Start | End | PTM              | AScore                      | Found By |
|------------------------------------------|------|--------|-----------|--------|-----|-----------|---|-------|----------|---------|-------------------|-----------------|----------|---------------------|-------|-----|------------------|-----------------------------|----------|
| R.NAMFVPHYTLNAHTIVVALN(+.98)GR.A         | Y    | 154.33 | 2438.2529 | 22     | 2.1 | 813.7599  | 3 | 33.95 | 3        | F3:1683 | OB5933 H2 raw.raw | 5.0871E6        | 4        | 4                   | 383   | 404 | Deamidation (NQ) | N20:Deamidation (NQ):218.32 | PEAKS DB |
| R.SVNELDLPILGWLGLSAQHGTIYR.N             | Y    | 147.15 | 2651.4070 | 24     | 1.0 | 1326.7120 | 2 | 39.90 | 1        | F1:1894 | OB5921 H2 raw.raw | 6.1669E7        | 7        | 7                   | 359   | 382 |                  |                             | PEAKS DB |
| R.NAMFVPHYTLNAHTIVVALNLR.A               | Y    | 140.28 | 2437.2688 | 22     | 1.7 | 1219.6438 | 2 | 35.24 | 2        | F2:1717 | OB5932 H2 raw.raw | 1.1969E7        | 6        | 6                   | 383   | 404 |                  |                             | PEAKS DB |
| K.TDSRPSIANLAGENSIIDNLPEEVVANSYR.L       | Y    | 128.13 | 3243.6006 | 30     | 3.7 | 1082.2114 | 3 | 36.34 | 2        | F2:1837 | OB5932 H2 raw.raw | 1.7742E7        | 6        | 6                   | 452   | 481 |                  |                             | PEAKS DB |
| K.TDSRPSIANLAGENSIIDNLPEEVVAN(+.98)SYR.L | Y    | 123.94 | 3244.5847 | 30     | 3.8 | 1082.5397 | 3 | 35.65 | 2        | F2:1760 | OB5932 H2 raw.raw | 0               | 0        | 0                   | 452   | 481 | Deamidation (NQ) | N27:Deamidation (NQ):81.59  | PEAKS DB |
| K.AQSENYEYLAFAK.T                        | Y    | 123.69 | 1461.6776 | 12     | 0.8 | 731.8467  | 2 | 31.43 | 1        | F1:1390 | OB5921 H2 raw.raw | 5.3867E6        | 3        | 3                   | 440   | 451 |                  |                             | PEAKS DB |
| R.NAM(+15.99)FVPHYTLNAHTIVVALNLR.A       | Y    | 121.47 | 2453.2637 | 22     | 2.2 | 818.7636  | 3 | 33.56 | 3        | F3:1651 | OB5933 H2 raw.raw | 1.2362E6        | 2        | 2                   | 383   | 404 | Oxidation (M)    | M3:Oxidation (M):1000.00    | PEAKS DB |
| R.SSNPDIYNPQAGSLR.S                      | Y    | 121.43 | 1617.7747 | 15     | 0.5 | 809.8950  | 2 | 28.51 | 1        | F1:1221 | OB5921 H2 raw.raw | 1.8561E6        | 3        | 3                   | 344   | 358 |                  |                             | PEAKS DB |
| R.N(+.98)AMFVPHYTLNAHTIVVALNLR.A         | Y    | 118.49 | 2438.2529 | 22     | 2.9 | 1220.1373 | 2 | 34.78 | 2        | F2:1708 | OB5932 H2 raw.raw | 0               | 0        | 0                   | 383   | 404 | Deamidation (NQ) | N1:Deamidation (NQ):79.74   | PEAKS DB |

total 35 peptides

| Peptide                                        | Uniq | -10lgP | Mass      | Length | ppm | m/z       | z | RT    | Fraction | Scan    | Source File       | Area Raw Area 2 | #Feature | #Feature Raw Area 2 | Start | End | PTM                             | AScore                                                                        | Found By  |
|------------------------------------------------|------|--------|-----------|--------|-----|-----------|---|-------|----------|---------|-------------------|-----------------|----------|---------------------|-------|-----|---------------------------------|-------------------------------------------------------------------------------|-----------|
| L.PILGWLGLSAQHGTIYR.N                          | Y    | 111.93 | 1881.0261 | 17     | 2.5 | 941.5227  | 2 | 39.89 | 3        | F3:2036 | OB5933 H2 raw.raw | 1.5582E5        | 1        | 1                   | 366   | 382 |                                 |                                                                               | PEAKS DB  |
| R.NAM(+15.99)FVPHYTLNAHTIVVALN(+.98)GR.A       | Y    | 110.86 | 2454.2478 | 22     | 2.8 | 1228.1346 | 2 | 32.81 | 3        | F3:1623 | OB5933 H2 raw.raw | 1.7713E6        | 6        | 6                   | 383   | 404 | Oxidation (M); Deamidation (NQ) | M3:Oxidation (M):1000.00;N2 0:Deamidation (NQ):123.21                         | PEAKS DB  |
| R.AHVQVVDN(+.98)GNRVYDEELQEGHVLVVPQNFVAFAAK.A  | Y    | 98.59  | 3831.9180 | 35     | 3.6 | 1278.3179 | 3 | 32.25 | 3        | F3:1584 | OB5933 H2 raw.raw | 9.4081E6        | 2        | 2                   | 405   | 439 |                                 | N9:Deamidation (NQ):9.40                                                      | PEAKS DB  |
| N.GIEETIC(+57.02)SASVK.K                       | Y    | 95.93  | 1292.6282 | 12     | 2.2 | 647.3228  | 2 | 29.07 | 1        | F1:1261 | OB5921 H2 raw.raw | 1.1569E5        | 3        | 3                   | 327   | 338 | Carbamidomethylation            | C7:Carbamidomethylation:1000.00                                               | PEAKS DB  |
| K.TDSRPSIANLAGEN(+.98)SIIDNLPEEVVANSYR.L       | Y    | 95.61  | 3244.5847 | 30     | 8.0 | 1082.5442 | 3 | 36.12 | 3        | F3:1826 | OB5933 H2 raw.raw | 5.3609E7        | 2        | 2                   | 452   | 481 |                                 | N14:Deamidation (NQ):31.31                                                    | PEAKS DB  |
| R.N(+.98)AMFVPHYTLNAHTIVVALN(+.98)GR.A         | Y    | 87.68  | 2439.2368 | 22     | 8.7 | 814.0933  | 3 | 34.13 | 3        | F3:1683 | OB5933 H2 raw.raw | 4.359E6         | 1        | 1                   | 383   | 404 | Deamidation (NQ)                | N1:Deamidation (NQ):53.47;N2 0:Deamidation (NQ):61.12                         | PEAKS DB  |
| K.FFVPPFDHQSRE.V                               | Y    | 82.77  | 1635.7504 | 13     | 1.4 | 818.8836  | 2 | 32.55 | 1        | F1:1469 | OB5921 H2 raw.raw | 1.5304E6        | 4        | 4                   | 498   | 510 |                                 |                                                                               | PEAKS DB  |
| R.NAMFVPHYTLN(+.98)AHTIVVALNGR.A               | Y    | 81.31  | 2438.2529 | 22     | 3.7 | 813.7613  | 3 | 35.31 | 1        | F1:1635 | OB5921 H2 raw.raw | 0               | 0        | 0                   | 383   | 404 |                                 | N11:Deamidation (NQ):33.51                                                    | PEAKS DB  |
| R.VYDEELQEGHVLVVPQNFVAFAAK.A                   | Y    | 74.42  | 2554.3066 | 23     | 1.2 | 852.4438  | 3 | 33.17 | 1        | F1:1510 | OB5921 H2 raw.raw | 0               | 0        | 0                   | 417   | 439 |                                 |                                                                               | PEAKS DB  |
| R.SVNE(+57.02)LDLPILGWLGLSAQHGTIYR.N           | Y    | 72.38  | 2708.4285 | 24     | 1.0 | 1355.2229 | 2 | 40.09 | 2        | F2:2024 | OB5932 H2 raw.raw | 1.9952E5        | 1        | 1                   | 359   | 382 |                                 | E4:Carbamidomethylation (DHK E_X@N-term):5.03                                 | PEAKS PTM |
| N.GIEETIC(+57.02)SASVKK.N                      | Y    | 70.24  | 1420.7231 | 13     | 0.8 | 711.3694  | 2 | 27.44 | 2        | F2:1263 | OB5932 H2 raw.raw | 3.7518E5        | 3        | 3                   | 327   | 339 | Carbamidomethylation            | C7:Carbamidomethylation:1000.00                                               | PEAKS DB  |
| K.TDSRPSIANLAGENSIIDNLPEEVVANSYRLPR.E          | Y    | 68.47  | 3609.8386 | 33     | 2.2 | 903.4689  | 4 | 36.12 | 3        | F3:1817 | OB5933 H2 raw.raw | 2.0614E7        | 5        | 5                   | 452   | 484 |                                 |                                                                               | PEAKS DB  |
| R.N(+.98)AM(+15.99)FVPHYTLNAHTIVVALN(+.98)GR.A | Y    | 68.22  | 2455.2317 | 22     | 8.4 | 819.4247  | 3 | 34.50 | 2        | F2:1707 | OB5932 H2 raw.raw | 1.9858E5        | 1        | 1                   | 383   | 404 | Oxidation (M)                   | N1:Deamidation (NQ):27.37;M3:Oxidation (M):1000.00;N20:Deamidation (NQ):39.72 | PEAKS DB  |
| R.SVNELDLPILGW(+31.99)LGLSAQHGTIYR.N           | Y    | 66.16  | 2683.3970 | 24     | 3.1 | 1342.7100 | 2 | 38.93 | 3        | F3:1986 | OB5933 H2 raw.raw | 6.9221E5        | 2        | 2                   | 359   | 382 |                                 | W12:Dihydroxy:33.65                                                           | PEAKS PTM |
| K.FFVPPFDHQS.M                                 | Y    | 63.99  | 1219.5662 | 10     | 0.3 | 610.7905  | 2 | 33.29 | 1        | F1:1544 | OB5921 H2 raw.raw | 2.015E5         | 1        | 1                   | 498   | 507 |                                 |                                                                               | PEAKS DB  |
| R.N(+.98)AMFVPHYTLN(+.98)AHTIVVALNGR.A         | Y    | 59.69  | 2439.2368 | 22     | 9.3 | 814.0938  | 3 | 35.76 | 3        | F3:1773 | OB5933 H2 raw.raw | 7.1072E5        | 1        | 1                   | 383   | 404 |                                 | N1:Deamidation (NQ):40.15;N1 1:Deamidation (NQ):28.29                         | PEAKS DB  |
| V.PQNFAFAAK.A                                  | N    | 51.53  | 944.5079  | 9      | 0.5 | 473.2615  | 2 | 32.25 | 3        | F3:1586 | OB5933 H2 raw.raw | 2.3208E6        | 2        | 2                   | 431   | 439 |                                 |                                                                               | PEAKS DB  |
| K.TDSRPSIANLAGENSIIDN(+.98)LPEEVVANSYR.L       | Y    | 49.89  | 3244.5847 | 30     | 8.0 | 1082.5442 | 3 | 36.12 | 3        | F3:1810 | OB5933 H2 raw.raw | 5.3512E7        | 1        | 1                   | 452   | 481 |                                 | N19:Deamidation (NQ):6.49                                                     | PEAKS DB  |
| total 35 peptides                              |      |        |           |        |     |           |   |       |          |         |                   |                 |          |                     |       |     |                                 |                                                                               |           |



| Peptide                                             | Uniq | -10lgP | Mass      | Length | ppm  | m/z       | z | RT    | Fraction | Scan    | Source File       | Area Raw Area 2 | #Feature | #Feature Raw Area 2 | Start | End | PTM             | AScore                     | Found By  |
|-----------------------------------------------------|------|--------|-----------|--------|------|-----------|---|-------|----------|---------|-------------------|-----------------|----------|---------------------|-------|-----|-----------------|----------------------------|-----------|
| R.AHVQVVDSENGN(+.98)RVYDEELQEGHVLVVPQNFAVAAK.A      | Y    | 49.15  | 3831.9180 | 35     | 1.8  | 767.3923  | 5 | 32.25 | 3        | F3:1589 | OB5933 H2 raw.raw | 2.7476E5        | 1        | 1                   | 405   | 439 |                 | N11:Deamidation (NQ):0.00  | PEAKS DB  |
| R.QLKNNNPFK.F                                       | N    | 45.67  | 1101.5930 | 9      | -0.6 | 551.8035  | 2 | 27.25 | 3        | F3:1282 | OB5933 H2 raw.raw | 1.2465E4        | 2        | 2                   | 489   | 497 |                 |                            | PEAKS DB  |
| K.FFVPPFDHQSM(+15.99).R                             | Y    | 44.78  | 1366.6016 | 11     | -0.2 | 684.3079  | 2 | 33.49 | 1        | F1:1527 | OB5921 H2 raw.raw | 4.1366E4        | 1        | 1                   | 498   | 508 | Oxidation (M)   | M11:Oxidation (M):1000.00  | PEAKS DB  |
| K.FFVPPFDHQSM.R                                     | Y    | 42.50  | 1350.6067 | 11     | -0.5 | 676.3103  | 2 | 34.43 | 1        | F1:1571 | OB5921 H2 raw.raw | 4.9902E4        | 1        | 1                   | 498   | 508 |                 |                            | PEAKS DB  |
| K.FFVPPFDHQSM(+15.99)RE.V                           | Y    | 37.46  | 1651.7452 | 13     | 0.6  | 551.5894  | 3 | 31.99 | 1        | F1:1457 | OB5921 H2 raw.raw | 2.1439E5        | 1        | 1                   | 498   | 510 | Oxidation (M)   | M11:Oxidation (M):1000.00  | PEAKS DB  |
| R.Q(-17.03)LKNNNPFK.F                               | N    | 35.41  | 1084.5665 | 9      | 0.4  | 543.2908  | 2 | 28.36 | 3        | F3:1357 | OB5933 H2 raw.raw | 1.237E4         | 1        | 1                   | 489   | 497 | Pyro-glu from Q | Q1:Pyro-glu from Q:1000.00 | PEAKS PTM |
| R.AHVQ(+.98)VVDSENGNRVYDEELQEGHVLVVPQNFAVAAK.A      | Y    | 35.00  | 3831.9180 | 35     | 2.1  | 767.3925  | 5 | 32.58 | 2        | F2:1579 | OB5932 H2 raw.raw | 0               | 0        | 0                   | 405   | 439 |                 | Q4:Deamidation (NQ):0.00   | PEAKS DB  |
| K.AQSENYEYLAFKTSRPSIANLAGEN(+.98)SIIDNLPEEVVANSYR.L | Y    | 34.68  | 4688.2515 | 42     | 4.7  | 1173.0757 | 4 | 36.70 | 2        | F2:1816 | OB5932 H2 raw.raw | 2.4176E5        | 1        | 1                   | 440   | 481 |                 | N26:Deamidation (NQ):0.00  | PEAKS DB  |
| total 35 peptides                                   |      |        |           |        |      |           |   |       |          |         |                   |                 |          |                     |       |     |                 |                            |           |

Q6T2T4|Q6T2T4\_ARAHY

back to list

| Protein Coverage | Supporting Peptides |

Protein Coverage:

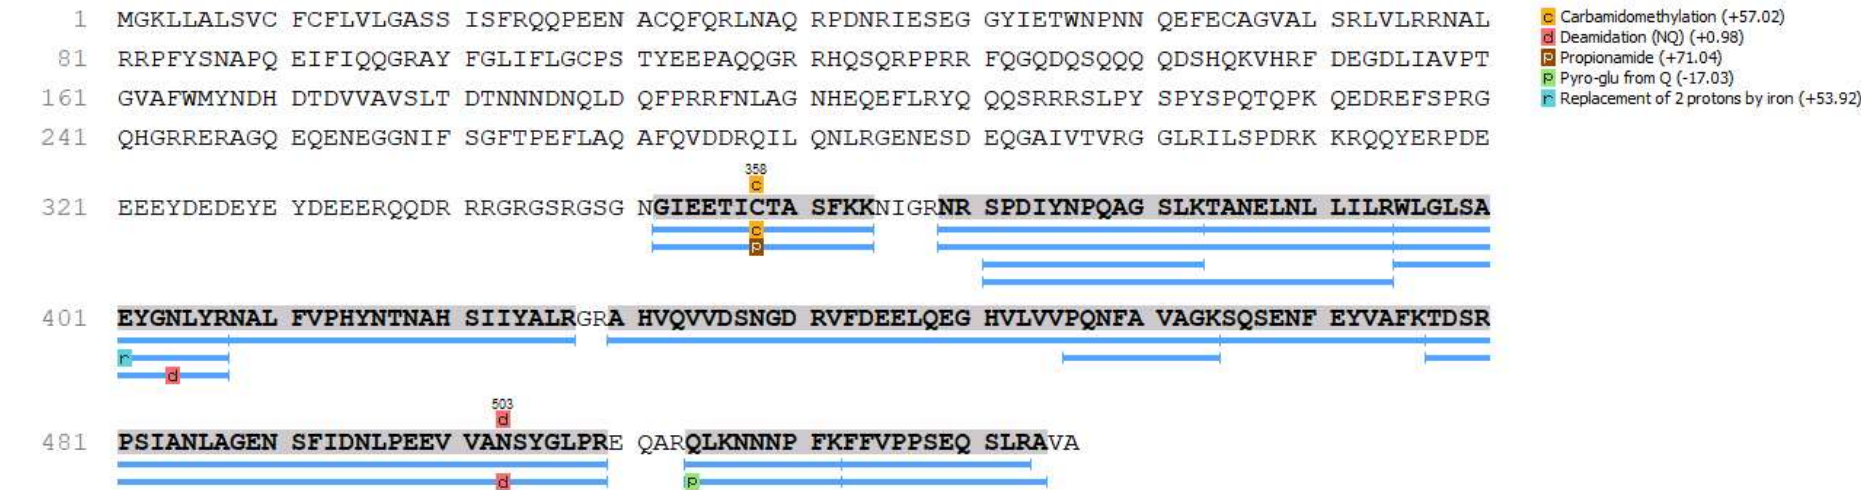

Supporting Peptides:

| Peptide           | Uniq | -10lgP | Mass | Length | ppm | m/z | z | RT | Fraction | Scan | Source File | Area Raw Area 2 | #Feature | #Feature Raw Area 2 | Start | End | PTM | AScore | Found By |
|-------------------|------|--------|------|--------|-----|-----|---|----|----------|------|-------------|-----------------|----------|---------------------|-------|-----|-----|--------|----------|
| total 27 peptides |      |        |      |        |     |     |   |    |          |      |             |                 |          |                     |       |     |     |        |          |

| Peptide                                       | Uniq | -10lgP | Mass      | Length | ppm  | m/z       | z | RT    | Fraction | Scan    | Source File       | Area Raw Area 2 | #Feature | #Feature Raw Area 2 | Start | End | PTM                  | AScore                                                                         | Found By  |
|-----------------------------------------------|------|--------|-----------|--------|------|-----------|---|-------|----------|---------|-------------------|-----------------|----------|---------------------|-------|-----|----------------------|--------------------------------------------------------------------------------|-----------|
| K.TDSRPSIANLAGENSFIDNLPEEVVANSYGLPR.E         | N    | 147.12 | 3544.7434 | 33     | 1.0  | 1182.5896 | 3 | 37.44 | 2        | F2:1890 | OB5932 H2 raw.raw | 1.1607E8        | 11       | 11                  | 477   | 509 |                      |                                                                                | PEAKS DB  |
| R.SPDIYNPQAGSLKTANELNLLILR.W                  | N    | 144.08 | 2639.4282 | 24     | 0.9  | 880.8175  | 3 | 35.79 | 2        | F2:1765 | OB5932 H2 raw.raw | 1.8094E6        | 3        | 3                   | 371   | 394 |                      |                                                                                | PEAKS DB  |
| R.WLGLSAEYGNLYR.N                             | N    | 135.04 | 1540.7673 | 13     | 2.6  | 771.3929  | 2 | 34.80 | 1        | F1:1640 | OB5921 H2 raw.raw | 3.956E7         | 16       | 15                  | 395   | 407 |                      |                                                                                | PEAKS DB  |
| R.NALFVPHYNTNAHSIIYALR.G                      | N    | 133.14 | 2313.2019 | 20     | 2.3  | 1157.6108 | 2 | 33.37 | 2        | F2:1607 | OB5932 H2 raw.raw | 3.0446E7        | 14       | 13                  | 408   | 427 |                      |                                                                                | PEAKS DB  |
| K.SQSENFYVAFK.T                               | N    | 122.47 | 1447.6619 | 12     | 2.4  | 724.8400  | 2 | 31.43 | 1        | F1:1392 | OB5921 H2 raw.raw | 1.027E7         | 4        | 4                   | 465   | 476 |                      |                                                                                | PEAKS DB  |
| R.NRSPDIYNPQAGSLK.T                           | N    | 115.99 | 1658.8376 | 15     | 0.4  | 830.4265  | 2 | 27.80 | 2        | F2:1285 | OB5932 H2 raw.raw | 8.3597E5        | 6        | 6                   | 369   | 383 |                      |                                                                                | PEAKS DB  |
| K.TDSRPSIANLAGENSFIDNLPEEVVAN(+.98)SYGLPR.E   | N    | 110.77 | 3545.7273 | 33     | 0.2  | 1182.9166 | 3 | 36.74 | 2        | F2:1825 | OB5932 H2 raw.raw | 7.8948E3        | 1        | 1                   | 477   | 509 | Deamidation (NQ)     | N27:Deamidation (NQ):118.18                                                    | PEAKS DB  |
| R.AHVQVVDSNGDRVFDEELQEGHVLVVPQNFAVAGK.S       | Y    | 109.59 | 3801.9075 | 35     | 2.2  | 1268.3125 | 3 | 33.37 | 2        | F2:1626 | OB5932 H2 raw.raw | 3.9148E6        | 2        | 2                   | 430   | 464 |                      |                                                                                | PEAKS DB  |
| R.SPDIYNPQAGSLK.T                             | N    | 106.60 | 1388.6936 | 13     | 1.9  | 695.3554  | 2 | 28.54 | 3        | F3:1354 | OB5933 H2 raw.raw | 1.3705E6        | 3        | 3                   | 371   | 383 |                      |                                                                                | PEAKS DB  |
| K.FFVPPSEQSLRA.V                              | Y    | 86.01  | 1376.7087 | 12     | 1.8  | 689.3629  | 2 | 31.25 | 1        | F1:1399 | OB5921 H2 raw.raw | 1.104E6         | 3        | 3                   | 523   | 534 |                      |                                                                                | PEAKS DB  |
| K.TANELNLLILR.W                               | N    | 82.01  | 1268.7452 | 11     | 0.7  | 635.3803  | 2 | 34.98 | 1        | F1:1608 | OB5921 H2 raw.raw | 2.5833E7        | 5        | 5                   | 384   | 394 |                      |                                                                                | PEAKS DB  |
| N.GIEETIC(+57.02)TASFKK.N                     | Y    | 81.85  | 1482.7388 | 13     | 1.0  | 742.3774  | 2 | 29.09 | 2        | F2:1362 | OB5932 H2 raw.raw | 7.7376E5        | 5        | 5                   | 352   | 364 | Carbamidomethylation | C7:Carbamidomethylation:1000.00                                                | PEAKS DB  |
| K.FFVPPSEQSLR.A                               | Y    | 77.46  | 1305.6716 | 11     | -0.5 | 653.8428  | 2 | 30.96 | 2        | F2:1479 | OB5932 H2 raw.raw | 5.8436E5        | 3        | 3                   | 523   | 533 |                      |                                                                                | PEAKS DB  |
| R.S(+57.02)PDIYNPQAGSLK.T                     | N    | 77.15  | 1445.7150 | 13     | 5.4  | 723.8687  | 2 | 28.54 | 3        | F3:1379 | OB5933 H2 raw.raw | 8.1843E3        | 1        | 1                   | 371   | 383 |                      | S1:Carbamidomethylation (DHKE, X@N-term):30.83                                 | PEAKS PTM |
| V.PQNFAVAGK.S                                 | N    | 71.84  | 930.4923  | 9      | 0.8  | 466.2538  | 2 | 32.44 | 2        | F2:1562 | OB5932 H2 raw.raw | 4.3278E6        | 2        | 2                   | 456   | 464 |                      |                                                                                | PEAKS DB  |
| N.G(+57.02)IEETIC(+57.02)TASFKK.N             | Y    | 66.26  | 1539.7603 | 13     | 0.5  | 770.8878  | 2 | 29.27 | 2        | F2:1382 | OB5932 H2 raw.raw | 6.2038E4        | 2        | 2                   | 352   | 364 | Carbamidomethylation | G1:Carbamidomethylation (DHKE, X@N-term):22.85;C7:Carbamidomethylation:1000.00 | PEAKS PTM |
| R.NRSPDIYNPQAGSLKTANELNLLILR.W                | N    | 64.74  | 2909.5723 | 26     | 1.5  | 970.8661  | 3 | 34.50 | 2        | F2:1698 | OB5932 H2 raw.raw | 6.2575E4        | 1        | 1                   | 369   | 394 |                      |                                                                                | PEAKS DB  |
| R.AHVQVVDSNGDRVFDEELQ(+.98)EGHVLVVPQNFAVAGK.S | Y    | 64.57  | 3802.8914 | 35     | 6.3  | 951.7361  | 4 | 33.37 | 2        | F2:1633 | OB5932 H2 raw.raw | 6.1141E4        | 1        | 1                   | 430   | 464 |                      | Q19:Deamidation (NQ):0.00                                                      | PEAKS DB  |
| R.NALFVPH(+14.02)YNTNAHSIIYALR.G              | N    | 52.59  | 2327.2175 | 20     | 0.3  | 776.7467  | 3 | 35.36 | 1        | F1:1633 | OB5921 H2 raw.raw | 1.4175E5        | 1        | 1                   | 408   | 427 |                      | H7:Methylation(thers):18.00                                                    | PEAKS PTM |

total 27 peptides

| Peptide                                     | Uniq | -10lgP | Mass      | Length | ppm  | m/z       | z | RT    | Fraction | Scan    | Source File       | Area Raw Area 2 | #Feature | #Feature Raw Area 2 | Start | End | PTM                              | AScore                                     | Found By  |
|---------------------------------------------|------|--------|-----------|--------|------|-----------|---|-------|----------|---------|-------------------|-----------------|----------|---------------------|-------|-----|----------------------------------|--------------------------------------------|-----------|
| K.TDSRPSIANLAGEN(+.98)SFIDNLPEEVVANSYGLPR.E | N    | 46.28  | 3545.7273 | 33     | 6.3  | 1182.9238 | 3 | 48.72 | 1        | F1:2418 | OB5921 H2 raw.raw | 9.731E3         | 2        | 2                   | 477   | 509 |                                  | N14:Deamidation (N Q):29.85                | PEAKS DB  |
| R.QLKNNNPFK.F                               | N    | 45.67  | 1101.5930 | 9      | -0.6 | 551.8035  | 2 | 27.25 | 3        | F3:1282 | OB5933 H2 raw.raw | 1.2465E4        | 2        | 2                   | 514   | 522 |                                  |                                            | PEAKS DB  |
| R.WLGLSAE(+53.92)YGNYLR.N                   | N    | 45.19  | 1594.6866 | 13     | 0.4  | 532.5697  | 3 | 34.87 | 2        | F2:1718 | OB5932 H2 raw.raw | 1.8492E5        | 2        | 2                   | 395   | 407 | Replacement of 2 protons by iron | E7:Replacement of 2 protons by iron:156.85 | PEAKS PTM |
| R.N(+.98)ALFVPHYNTNAHSIIYALR.G              | N    | 41.98  | 2314.1858 | 20     | 3.6  | 772.4053  | 3 | 45.28 | 3        | F3:2182 | OB5933 H2 raw.raw | 6.3088E4        | 1        | 1                   | 408   | 427 |                                  | N1:Deamidation (N Q):32.94                 | PEAKS DB  |
| R.WLGLSAEYGN(+.98)LYR.N                     | N    | 36.96  | 1541.7513 | 13     | 7.3  | 771.8886  | 2 | 52.84 | 1        | F1:2630 | OB5921 H2 raw.raw | 0               | 0        | 0                   | 395   | 407 | Deamidation (NQ)                 | N10:Deamidation (N Q):1000.00              | PEAKS DB  |
| N.GIEETIC(+71.04)TASFKK.N                   | Y    | 36.68  | 1496.7544 | 13     | 1.2  | 749.3854  | 2 | 29.27 | 2        | F2:1378 | OB5932 H2 raw.raw | 2.0631E4        | 1        | 1                   | 352   | 364 | Propionamide                     | C7:Propionamide:1000.00                    | PEAKS PTM |
| K.SQSE(+53.92)NFEYVAFK.T                    | N    | 36.67  | 1501.5812 | 12     | -1.3 | 751.7969  | 2 | 31.69 | 2        | F2:1525 | OB5932 H2 raw.raw | 2.6345E5        | 1        | 1                   | 465   | 476 |                                  | E4:Replacement of 2 protons by iron:32.69  | PEAKS PTM |
| R.Q(-17.03)LKNNNPFK.F                       | N    | 35.41  | 1084.5665 | 9      | 0.4  | 543.2908  | 2 | 28.36 | 3        | F3:1357 | OB5933 H2 raw.raw | 1.237E4         | 1        | 1                   | 514   | 522 | Pyro-glu from Q                  | Q1:Pyro-glu from Q:1000.00                 | PEAKS PTM |
| total 27 peptides                           |      |        |           |        |      |           |   |       |          |         |                   |                 |          |                     |       |     |                                  |                                            |           |

**[back to list](#)**

**Protein Coverage | Supporting Peptides |**

### Protein Coverage:

1 MGKLLALSVC FCFLVLGASS ISFRQQPEEN ACQFQRLNAQ RPDNRIESEG GYIETWNPNN QEFECAGVAL SRLVLRNAL  
81 RRPFYSNAPQ EIFIQQGRGY FGLIFPGCPS TYEPAQQGR RHQSQRPPRR FQGQDQSQQQ QDSHQKVHRF DEGDLIAVPT  
161 GVAFWMYNDH DTDVVAVSLT DTNNNDNQLD QFPRRFNLAG NHEQEFLRYQ QSRRRSLPY SPYSPQTQPK QEDREFSPRG  
241 QHGRRERAGQ EQENEGGNIF SGFTPEFLAQ AFQVDDRQIL QNLRGENESD EQGAIVTVRG GLRILSPDRK RRQQYERPDE  
321 EEEYDEDEYE YDEEERQHDR RRGGRSGRSG NGIEETICTA SFKKNIGRNR SPDIYNPQAG SLKTANELNL LILRWLGLSA  
401 EYGNLYRNAL FVPHYNTNAH SIIYALRGRA HVQVVDNSGD RVFDEELQEG HVLVVPQNFA VAGKSQSENF EYVAFKTDNR  
481 PSIANLAGEN SFIDNLPEEV VANSYGLPRE QARQLKNNNP FKFFVPPSEQ SLRAVA

- Carbamidomethylation (+57.02)
- Deamidation (NQ) (+0.98)
- Propionamide (+71.04)
- Pyro-glu from Q (-17.03)
- Replacement of 2 protons by iron (+53.92)

### Supporting Peptides:

| Peptide           | Uniq | -10lgP | Mass | Length | ppm | m/z | z | RT | Fraction | Scan | Source File | Area Raw Area 2 | #Feature Raw Area 2 | Start | End | PTM | AScore | Found By |
|-------------------|------|--------|------|--------|-----|-----|---|----|----------|------|-------------|-----------------|---------------------|-------|-----|-----|--------|----------|
| total 27 peptides |      |        |      |        |     |     |   |    |          |      |             |                 |                     |       |     |     |        |          |

| Peptide                                       | Uniq | -10lgP | Mass      | Length | ppm  | m/z       | z | RT    | Fraction | Scan    | Source File       | Area Raw Area 2 | #Feature | #Feature Raw Area 2 | Start | End | PTM                  | AScore                                                                         | Found By  |
|-----------------------------------------------|------|--------|-----------|--------|------|-----------|---|-------|----------|---------|-------------------|-----------------|----------|---------------------|-------|-----|----------------------|--------------------------------------------------------------------------------|-----------|
| K.TDSRPSIANLAGENSFIDNLPeeVVANSYGLPR.E         | N    | 147.12 | 3544.7434 | 33     | 1.0  | 1182.5896 | 3 | 37.44 | 2        | F2:1890 | OB5932 H2 raw.raw | 1.1607E8        | 11       | 11                  | 477   | 509 |                      |                                                                                | PEAKS DB  |
| R.SPDIYNPQAGSLKTANELNLLILR.W                  | N    | 144.08 | 2639.4282 | 24     | 0.9  | 880.8175  | 3 | 35.79 | 2        | F2:1765 | OB5932 H2 raw.raw | 1.8094E6        | 3        | 3                   | 371   | 394 |                      |                                                                                | PEAKS DB  |
| R.WLGLSAEYGNLYR.N                             | N    | 135.04 | 1540.7673 | 13     | 2.6  | 771.3929  | 2 | 34.80 | 1        | F1:1640 | OB5921 H2 raw.raw | 3.956E7         | 16       | 15                  | 395   | 407 |                      |                                                                                | PEAKS DB  |
| R.NALFVPHYNTNAHSIIYALR.G                      | N    | 133.14 | 2313.2019 | 20     | 2.3  | 1157.6108 | 2 | 33.37 | 2        | F2:1607 | OB5932 H2 raw.raw | 3.0446E7        | 14       | 13                  | 408   | 427 |                      |                                                                                | PEAKS DB  |
| K.SQSENFYVAFK.T                               | N    | 122.47 | 1447.6619 | 12     | 2.4  | 724.8400  | 2 | 31.43 | 1        | F1:1392 | OB5921 H2 raw.raw | 1.027E7         | 4        | 4                   | 465   | 476 |                      |                                                                                | PEAKS DB  |
| R.NRSPDIYNPQAGSLK.T                           | N    | 115.99 | 1658.8376 | 15     | 0.4  | 830.4265  | 2 | 27.80 | 2        | F2:1285 | OB5932 H2 raw.raw | 8.3597E5        | 6        | 6                   | 369   | 383 |                      |                                                                                | PEAKS DB  |
| K.TDSRPSIANLAGENSFIDNLPeeVVAN(+.98)SYGLPR.E   | N    | 110.77 | 3545.7273 | 33     | 0.2  | 1182.9166 | 3 | 36.74 | 2        | F2:1825 | OB5932 H2 raw.raw | 7.8948E3        | 1        | 1                   | 477   | 509 | Deamidation (NQ)     | N27:Deamidation (NQ):118.18                                                    | PEAKS DB  |
| R.AHVQVVDSNGDRVFDEELQEGHVLVVPQNFAVAGK.S       | Y    | 109.59 | 3801.9075 | 35     | 2.2  | 1268.3125 | 3 | 33.37 | 2        | F2:1626 | OB5932 H2 raw.raw | 3.9148E6        | 2        | 2                   | 430   | 464 |                      |                                                                                | PEAKS DB  |
| R.SPDIYNPQAGSLK.T                             | N    | 106.60 | 1388.6936 | 13     | 1.9  | 695.3554  | 2 | 28.54 | 3        | F3:1354 | OB5933 H2 raw.raw | 1.3705E6        | 3        | 3                   | 371   | 383 |                      |                                                                                | PEAKS DB  |
| K.FFVPPSEQSLRA.V                              | Y    | 86.01  | 1376.7087 | 12     | 1.8  | 689.3629  | 2 | 31.25 | 1        | F1:1399 | OB5921 H2 raw.raw | 1.104E6         | 3        | 3                   | 523   | 534 |                      |                                                                                | PEAKS DB  |
| K.TANELNLLILR.W                               | N    | 82.01  | 1268.7452 | 11     | 0.7  | 635.3803  | 2 | 34.98 | 1        | F1:1608 | OB5921 H2 raw.raw | 2.5833E7        | 5        | 5                   | 384   | 394 |                      |                                                                                | PEAKS DB  |
| N.GIEETIC(+57.02)TASFKK.N                     | Y    | 81.85  | 1482.7388 | 13     | 1.0  | 742.3774  | 2 | 29.09 | 2        | F2:1362 | OB5932 H2 raw.raw | 7.7376E5        | 5        | 5                   | 352   | 364 | Carbamidomethylation | C7:Carbamidomethylation:1000.00                                                | PEAKS DB  |
| K.FFVPPSEQSLR.A                               | Y    | 77.46  | 1305.6716 | 11     | -0.5 | 653.8428  | 2 | 30.96 | 2        | F2:1479 | OB5932 H2 raw.raw | 5.8436E5        | 3        | 3                   | 523   | 533 |                      |                                                                                | PEAKS DB  |
| R.S(+57.02)PDIYNPQAGSLK.T                     | N    | 77.15  | 1445.7150 | 13     | 5.4  | 723.8687  | 2 | 28.54 | 3        | F3:1379 | OB5933 H2 raw.raw | 8.1843E3        | 1        | 1                   | 371   | 383 |                      | S1:Carbamidomethylation (DHKE, X@N-term):30.83                                 | PEAKS PTM |
| V.PQNFAVAGK.S                                 | N    | 71.84  | 930.4923  | 9      | 0.8  | 466.2538  | 2 | 32.44 | 2        | F2:1562 | OB5932 H2 raw.raw | 4.3278E6        | 2        | 2                   | 456   | 464 |                      |                                                                                | PEAKS DB  |
| N.G(+57.02)IEETIC(+57.02)TASFKK.N             | Y    | 66.26  | 1539.7603 | 13     | 0.5  | 770.8878  | 2 | 29.27 | 2        | F2:1382 | OB5932 H2 raw.raw | 6.2038E4        | 2        | 2                   | 352   | 364 | Carbamidomethylation | G1:Carbamidomethylation (DHKE, X@N-term):22.85;C7:Carbamidomethylation:1000.00 | PEAKS PTM |
| R.NRSPDIYNPQAGSLKTANELNLLILR.W                | N    | 64.74  | 2909.5723 | 26     | 1.5  | 970.8661  | 3 | 34.50 | 2        | F2:1698 | OB5932 H2 raw.raw | 6.2575E4        | 1        | 1                   | 369   | 394 |                      |                                                                                | PEAKS DB  |
| R.AHVQVVDSNGDRVFDEELQ(+.98)EGHVLVVPQNFAVAGK.S | Y    | 64.57  | 3802.8914 | 35     | 6.3  | 951.7361  | 4 | 33.37 | 2        | F2:1633 | OB5932 H2 raw.raw | 6.1141E4        | 1        | 1                   | 430   | 464 |                      | Q19:Deamidation (NQ):0.00                                                      | PEAKS DB  |
| R.NALFVPH(+14.02)YNTNAHSIIYALR.G              | N    | 52.59  | 2327.2175 | 20     | 0.3  | 776.7467  | 3 | 35.36 | 1        | F1:1633 | OB5921 H2 raw.raw | 1.4175E5        | 1        | 1                   | 408   | 427 |                      | H7:Methylation(others):18.00                                                   | PEAKS PTM |

total 27 peptides

| Peptide                                      | Uniq | -10lgP | Mass      | Length | ppm  | m/z       | z | RT    | Fraction | Scan    | Source File       | Area Raw Ara h 2 | #Feature | #Feature Raw Ara h 2 | Start | End | PTM                              | AScore                                     | Found By  |
|----------------------------------------------|------|--------|-----------|--------|------|-----------|---|-------|----------|---------|-------------------|------------------|----------|----------------------|-------|-----|----------------------------------|--------------------------------------------|-----------|
| K.TDSRPSIANLAGEN(+.98)SFIDNLP EEVVANSYGLPR.E | N    | 46.28  | 3545.7273 | 33     | 6.3  | 1182.9238 | 3 | 48.72 | 1        | F1:2418 | OB5921 H2 raw.raw | 9.731E3          | 2        | 2                    | 477   | 509 |                                  | N14:Deamidation (N Q):29.85                | PEAKS DB  |
| R.QLKNNNPFK.F                                | N    | 45.67  | 1101.5930 | 9      | -0.6 | 551.8035  | 2 | 27.25 | 3        | F3:1282 | OB5933 H2 raw.raw | 1.2465E4         | 2        | 2                    | 514   | 522 |                                  |                                            | PEAKS DB  |
| R.WLGLSAE(+53.92)YGNLYR.N                    | N    | 45.19  | 1594.6866 | 13     | 0.4  | 532.5697  | 3 | 34.87 | 2        | F2:1718 | OB5932 H2 raw.raw | 1.8492E5         | 2        | 2                    | 395   | 407 | Replacement of 2 protons by iron | E7:Replacement of 2 protons by iron:156.85 | PEAKS PTM |
| R.N(+.98)ALFVPHYNTNAHSIIYALR.G               | N    | 41.98  | 2314.1858 | 20     | 3.6  | 772.4053  | 3 | 45.28 | 3        | F3:2182 | OB5933 H2 raw.raw | 6.3088E4         | 1        | 1                    | 408   | 427 |                                  | N1:Deamidation (N Q):32.94                 | PEAKS DB  |
| R.WLGLSAEYGN(+.98)LYR.N                      | N    | 36.96  | 1541.7513 | 13     | 7.3  | 771.8886  | 2 | 52.84 | 1        | F1:2630 | OB5921 H2 raw.raw | 0                | 0        | 0                    | 395   | 407 | Deamidation (NQ)                 | N10:Deamidation (N Q):1000.00              | PEAKS DB  |
| N.GIEETIC(+71.04)TASFKK.N                    | Y    | 36.68  | 1496.7544 | 13     | 1.2  | 749.3854  | 2 | 29.27 | 2        | F2:1378 | OB5932 H2 raw.raw | 2.0631E4         | 1        | 1                    | 352   | 364 | Propionamide                     | C7:Propionamide:1000.00                    | PEAKS PTM |
| K.SQSE(+53.92)NFEYVAFK.T                     | N    | 36.67  | 1501.5812 | 12     | -1.3 | 751.7969  | 2 | 31.69 | 2        | F2:1525 | OB5932 H2 raw.raw | 2.6345E5         | 1        | 1                    | 465   | 476 |                                  | E4:Replacement of 2 protons by iron:32.69  | PEAKS PTM |
| R.Q(-17.03)LKNNNPFK.F                        | N    | 35.41  | 1084.5665 | 9      | 0.4  | 543.2908  | 2 | 28.36 | 3        | F3:1357 | OB5933 H2 raw.raw | 1.237E4          | 1        | 1                    | 514   | 522 | Pyro-glu from Q                  | Q1:Pyro-glu from Q:1000.00                 | PEAKS PTM |
| total 27 peptides                            |      |        |           |        |      |           |   |       |          |         |                   |                  |          |                      |       |     |                                  |                                            |           |

E9LFE8|E9LFE8\_ARAHY

back to list

| Protein Coverage | Supporting Peptides |

Protein Coverage:

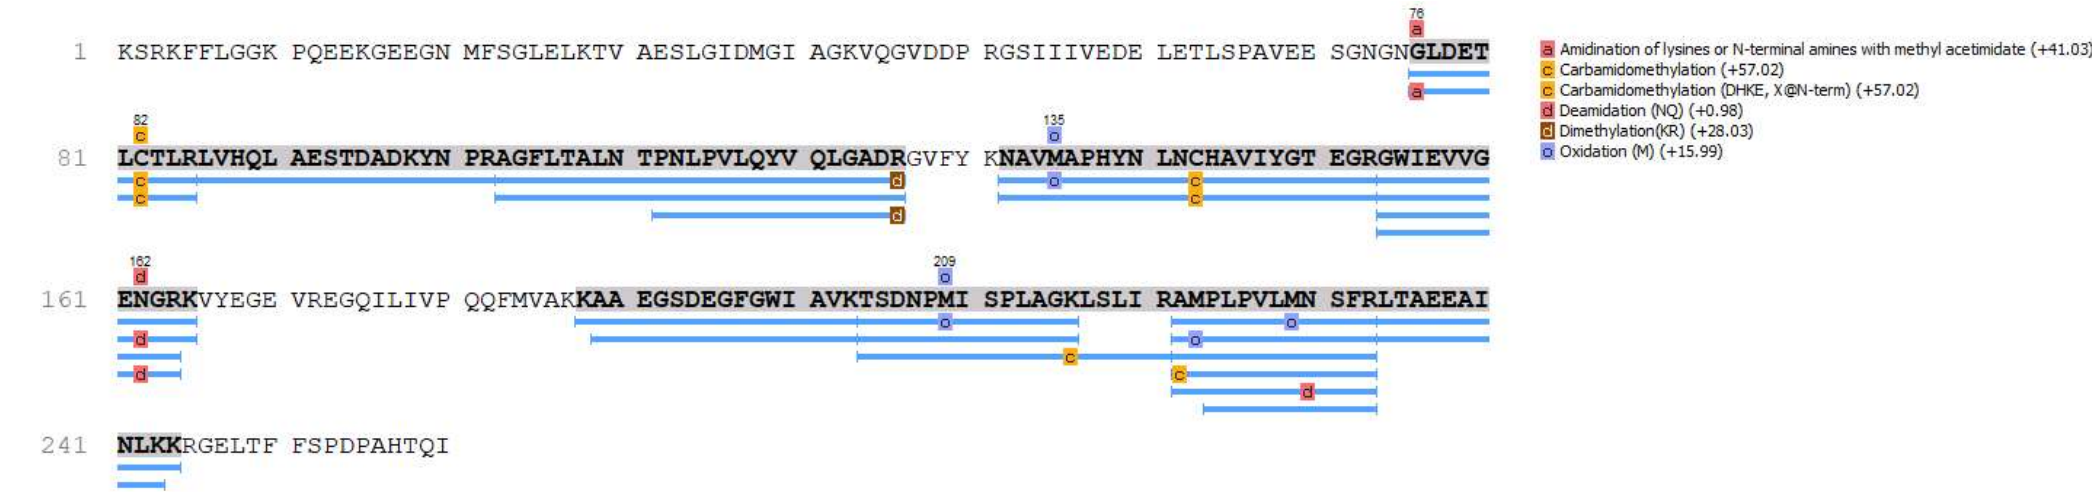

Supporting Peptides:

| Peptide           | Uniq | -10lgP | Mass | Length | ppm | m/z | z | RT | Fraction | Scan | Source File | Area Raw Ara h 2 | #Feature | #Feature Raw Ara h 2 | Start | End | PTM | AScore | Found By |
|-------------------|------|--------|------|--------|-----|-----|---|----|----------|------|-------------|------------------|----------|----------------------|-------|-----|-----|--------|----------|
| total 29 peptides |      |        |      |        |     |     |   |    |          |      |             |                  |          |                      |       |     |     |        |          |



| Peptide                                    | Uniq | -10lgP | Mass      | Length | ppm  | m/z       | z | RT    | Fraction | Scan    | Source File       | Area Raw Area 2 | #Feature | #Feature Raw Area 2 | Start | End | PTM                                 | AScore                                                     | Found By  |
|--------------------------------------------|------|--------|-----------|--------|------|-----------|---|-------|----------|---------|-------------------|-----------------|----------|---------------------|-------|-----|-------------------------------------|------------------------------------------------------------|-----------|
| K.KAAEGSDEGFGWIAVK.T                       | Y    | 138.77 | 1663.8206 | 16     | 2.8  | 832.9199  | 2 | 31.50 | 3        | F3:1541 | OB5933 H2 raw.raw | 1.5376E6        | 4        | 4                   | 188   | 203 |                                     |                                                            | PEAKS DB  |
| K.NAVMAPHYNLNC(+57.02)HAVIYGTEGR.G         | Y    | 136.92 | 2486.1582 | 22     | 2.2  | 829.7285  | 3 | 30.40 | 2        | F2:1439 | OB5932 H2 raw.raw | 4.9994E6        | 6        | 6                   | 132   | 153 | Carbamidomethylation                | C12:Carbamidomethylation:1000.00                           | PEAKS DB  |
| K.AAEGSDEGFGWIAVK.T                        | Y    | 131.37 | 1535.7256 | 15     | 2.3  | 768.8718  | 2 | 33.49 | 1        | F1:1529 | OB5921 H2 raw.raw | 7.8688E6        | 4        | 4                   | 189   | 203 |                                     |                                                            | PEAKS DB  |
| K.NAVM(+15.99)APHYNLNC(+57.02)HAVIYGTEGR.G | Y    | 130.39 | 2502.1533 | 22     | 0.8  | 835.0590  | 3 | 29.65 | 3        | F3:1430 | OB5933 H2 raw.raw | 6.8396E5        | 4        | 4                   | 132   | 153 | Oxidation (M); Carbamidomethylation | M4:Oxidation (M):1000.00; C12:Carbamidomethylation:1000.00 | PEAKS DB  |
| R.AGFLTALNTPNLPVLYVQLGADR(+28.03).G        | Y    | 123.01 | 2598.4170 | 24     | 4.3  | 1300.2213 | 2 | 39.90 | 2        | F2:2005 | OB5932 H2 raw.raw | 7.247E7         | 7        | 7                   | 103   | 126 | Dimethylation(KR)                   | R24:Dimethylation(KR):1000.00                              | PEAKS PTM |
| R.AMPLPVLN(+.98)SFR.L                      | Y    | 119.74 | 1375.6992 | 12     | 1.0  | 688.8575  | 2 | 35.55 | 1        | F1:1651 | OB5921 H2 raw.raw | 2.0235E5        | 2        | 2                   | 222   | 233 | Deamidation (NQ)                    | N9:Deamidation (NQ):1000.00                                | PEAKS DB  |
| K.TSDNPMISPLAGK.L                          | Y    | 118.92 | 1329.6598 | 13     | 2.4  | 665.8387  | 2 | 29.79 | 1        | F1:1298 | OB5921 H2 raw.raw | 2.7907E6        | 3        | 3                   | 204   | 216 |                                     |                                                            | PEAKS DB  |
| R.AMPLPVLNMSFR.L                           | Y    | 117.01 | 1374.7152 | 12     | 1.8  | 688.3661  | 2 | 36.30 | 1        | F1:1687 | OB5921 H2 raw.raw | 1.702E7         | 4        | 4                   | 222   | 233 |                                     |                                                            | PEAKS DB  |
| R.LVHQLAESTDADKYNPR.A                      | Y    | 112.35 | 1955.9701 | 17     | 2.6  | 978.9949  | 2 | 28.36 | 3        | F3:1344 | OB5933 H2 raw.raw | 2.5664E6        | 9        | 9                   | 86    | 102 |                                     |                                                            | PEAKS DB  |
| R.AMPLPVLN(+15.99)NSFR.L                   | Y    | 108.13 | 1390.7101 | 12     | 1.9  | 696.3636  | 2 | 34.43 | 1        | F1:1551 | OB5921 H2 raw.raw | 2.5374E6        | 3        | 3                   | 222   | 233 | Oxidation (M)                       | M8:Oxidation (M):151.86                                    | PEAKS DB  |
| R.GWIEVVGENGR.K                            | Y    | 107.73 | 1214.6044 | 11     | 0.0  | 608.3094  | 2 | 31.69 | 2        | F2:1532 | OB5932 H2 raw.raw | 6.914E5         | 3        | 3                   | 154   | 164 |                                     |                                                            | PEAKS DB  |
| R.AM(+15.99)PLPVLNMSFR.L                   | Y    | 100.79 | 1390.7101 | 12     | 1.9  | 696.3636  | 2 | 34.43 | 1        | F1:1586 | OB5921 H2 raw.raw | 2.5374E6        | 3        | 3                   | 222   | 233 | Oxidation (M)                       | M2:Oxidation (M):90.85                                     | PEAKS DB  |
| R.GWIEVVGEN(+.98)GR.K                      | Y    | 98.37  | 1215.5884 | 11     | 0.7  | 608.8019  | 2 | 32.18 | 1        | F1:1446 | OB5921 H2 raw.raw | 9.7206E4        | 1        | 1                   | 154   | 164 | Deamidation (NQ)                    | N9:Deamidation (NQ):1000.00                                | PEAKS DB  |
| R.GWIEVVGEN(+.98)GRK.V                     | Y    | 87.28  | 1343.6833 | 12     | 0.4  | 672.8492  | 2 | 30.33 | 1        | F1:1342 | OB5921 H2 raw.raw | 6.6322E5        | 4        | 4                   | 154   | 165 | Deamidation (NQ)                    | N9:Deamidation (NQ):1000.00                                | PEAKS DB  |
| N.GLDETLN(+57.02)TLR.L                     | Y    | 86.99  | 1176.5808 | 10     | 3.0  | 589.2994  | 2 | 30.96 | 2        | F2:1472 | OB5932 H2 raw.raw | 1.5884E6        | 5        | 5                   | 76    | 85  | Carbamidomethylation                | C7:Carbamidomethylation:1000.00                            | PEAKS DB  |
| R.GWIEVVGENGRK.V                           | Y    | 85.25  | 1342.6993 | 12     | 0.8  | 672.3575  | 2 | 30.17 | 1        | F1:1331 | OB5921 H2 raw.raw | 3.292E5         | 3        | 3                   | 154   | 165 |                                     |                                                            | PEAKS DB  |
| R.LTAEAEINLK.K                             | Y    | 80.99  | 1100.6077 | 10     | -0.1 | 551.3110  | 2 | 29.82 | 2        | F2:1410 | OB5932 H2 raw.raw | 2.6604E5        | 3        | 3                   | 234   | 243 |                                     |                                                            | PEAKS DB  |
| R.LTAEAEINLKK.R                            | Y    | 79.43  | 1228.7026 | 11     | 0.0  | 615.3586  | 2 | 27.27 | 1        | F1:1147 | OB5921 H2 raw.raw | 3.3199E5        | 4        | 4                   | 234   | 244 |                                     |                                                            | PEAKS DB  |
| R.AGFLTALNTPNLPVLYVQLGAD(+28.03)R.G        | Y    | 74.14  | 2598.4170 | 24     | 4.8  | 867.1504  | 3 | 39.70 | 3        | F3:2024 | OB5933 H2 raw.raw | 2.3507E6        | 1        | 1                   | 103   | 126 |                                     | D23:Ethylation:7.21                                        | PEAKS PTM |
| K.TSDNPM(+15.99)ISPLAGK.L                  | Y    | 68.00  | 1345.6548 | 13     | 0.6  | 673.8351  | 2 | 27.45 | 1        | F1:1162 | OB5921 H2 raw.raw | 1.2503E5        | 4        | 4                   | 204   | 216 | Oxidation (M)                       | M6:Oxidation (M):1000.00                                   | PEAKS DB  |
| total 29 peptides                          |      |        |           |        |      |           |   |       |          |         |                   |                 |          |                     |       |     |                                     |                                                            |           |

**[back to list](#)**

**Protein Coverage:**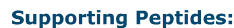

| Peptide                                  | Uniq | -10lgP | Mass      | Length | ppm  | m/z       | z | RT    | Fraction | Scan    | Source File       | Area Raw Area 2 | #Feature | #Feature Raw Area 2 | Start | End | PTM                              | AScore                                         | Found By  |
|------------------------------------------|------|--------|-----------|--------|------|-----------|---|-------|----------|---------|-------------------|-----------------|----------|---------------------|-------|-----|----------------------------------|------------------------------------------------|-----------|
| R.WLGLSAEYGNLYR.N                        | N    | 135.04 | 1540.7673 | 13     | 2.6  | 771.3929  | 2 | 34.80 | 1        | F1:1640 | OB5921 H2 raw.raw | 3.956E7         | 16       | 15                  | 388   | 400 |                                  |                                                | PEAKS DB  |
| R.NALFVPHYNTNAHSIIYALR.G                 | N    | 133.14 | 2313.2019 | 20     | 2.3  | 1157.6108 | 2 | 33.37 | 2        | F2:1607 | OB5932 H2 raw.raw | 3.0446E7        | 14       | 13                  | 401   | 420 |                                  |                                                | PEAKS DB  |
| K.SQSDNFEYVAFK.T                         | N    | 122.97 | 1433.6462 | 12     | 1.6  | 717.8315  | 2 | 31.69 | 3        | F3:1543 | OB5933 H2 raw.raw | 4.4734E6        | 3        | 3                   | 458   | 469 |                                  |                                                | PEAKS DB  |
| R.VYDEELQEGHVLVVPQNFAVAGK.S              | N    | 118.55 | 2540.2910 | 23     | 2.1  | 847.7727  | 3 | 32.93 | 1        | F1:1498 | OB5921 H2 raw.raw | 1.5993E6        | 6        | 6                   | 435   | 457 |                                  |                                                | PEAKS DB  |
| R.NRSPDIYNPQAGSLK.T                      | N    | 115.99 | 1658.8376 | 15     | 0.4  | 830.4265  | 2 | 27.80 | 2        | F2:1285 | OB5932 H2 raw.raw | 8.3597E5        | 6        | 6                   | 362   | 376 |                                  |                                                | PEAKS DB  |
| R.SPDIYNPQAGSLK.T                        | N    | 106.60 | 1388.6936 | 13     | 1.9  | 695.3554  | 2 | 28.54 | 3        | F3:1354 | OB5933 H2 raw.raw | 1.3705E6        | 3        | 3                   | 364   | 376 |                                  |                                                | PEAKS DB  |
| K.FFVPPSQQLRA.V                          | Y    | 101.65 | 1375.7247 | 12     | 1.8  | 688.8708  | 2 | 30.77 | 3        | F3:1487 | OB5933 H2 raw.raw | 1.3188E6        | 3        | 3                   | 516   | 527 |                                  |                                                | PEAKS DB  |
| N.GIEETIC(+57.02)TASVK.K                 | N    | 90.00  | 1306.6438 | 12     | 0.0  | 654.3292  | 2 | 28.91 | 3        | F3:1386 | OB5933 H2 raw.raw | 2.32E5          | 2        | 2                   | 345   | 356 | Carbamidomethylation             | C7:Carbamidomethylation: 1000.00               | PEAKS DB  |
| R.SPDIYNPQAGSLKTANDLNLILR.W              | N    | 89.73  | 2625.4126 | 24     | 0.2  | 876.1450  | 3 | 35.24 | 2        | F2:1743 | OB5932 H2 raw.raw | 1.5604E5        | 1        | 1                   | 364   | 387 |                                  |                                                | PEAKS DB  |
| K.FFVPPSQQLR.A                           | Y    | 88.50  | 1304.6876 | 11     | 0.4  | 653.3513  | 2 | 30.22 | 3        | F3:1455 | OB5933 H2 raw.raw | 6.1475E5        | 3        | 3                   | 516   | 526 |                                  |                                                | PEAKS DB  |
| R.AHVQVVDSDNGNRVYDEELQEGHVLVVPQNFAVAGK.S | N    | 86.70  | 3816.9182 | 35     | 2.8  | 1273.3169 | 3 | 32.06 | 3        | F3:1574 | OB5933 H2 raw.raw | 3.9867E6        | 2        | 2                   | 423   | 457 |                                  |                                                | PEAKS DB  |
| N.GIEETIC(+57.02)TASVK.K                 | N    | 79.22  | 1434.7388 | 13     | 1.2  | 718.3775  | 2 | 27.26 | 2        | F2:1253 | OB5932 H2 raw.raw | 2.7175E5        | 3        | 3                   | 345   | 357 | Carbamidomethylation             | C7:Carbamidomethylation: 1000.00               | PEAKS DB  |
| K.TANDLNLILR.W                           | N    | 79.10  | 1254.7296 | 11     | 1.2  | 628.3729  | 2 | 34.87 | 2        | F2:1737 | OB5932 H2 raw.raw | 1.5481E7        | 5        | 5                   | 377   | 387 |                                  |                                                | PEAKS DB  |
| R.S(+57.02)PDIYNPQAGSLK.T                | N    | 77.15  | 1445.7150 | 13     | 5.4  | 723.8687  | 2 | 28.54 | 3        | F3:1379 | OB5933 H2 raw.raw | 8.1843E3        | 1        | 1                   | 364   | 376 |                                  | S1:Carbamidomethylation (DHKE, X@N-term):30.83 | PEAKS PTM |
| V.PQNFAVAGK.S                            | N    | 71.84  | 930.4923  | 9      | 0.8  | 466.2538  | 2 | 32.44 | 2        | F2:1562 | OB5932 H2 raw.raw | 4.3278E6        | 2        | 2                   | 449   | 457 |                                  |                                                | PEAKS DB  |
| K.TAN(+.98)DLNLILR.W                     | N    | 67.54  | 1255.7136 | 11     | -1.0 | 628.8635  | 2 | 35.40 | 3        | F3:1771 | OB5933 H2 raw.raw | 0               | 0        | 0                   | 377   | 387 | Deamidation (NQ)                 | N3:Deamidation (NQ):68.31                      | PEAKS DB  |
| R.NALFVPH(+14.02)YNTNAHSIIYALR.G         | N    | 52.59  | 2327.2175 | 20     | 0.3  | 776.7467  | 3 | 35.36 | 1        | F1:1633 | OB5921 H2 raw.raw | 1.4175E5        | 1        | 1                   | 401   | 420 |                                  | H7:Methylation(others):18.00                   | PEAKS PTM |
| R.QLKNNNPFK.F                            | N    | 45.67  | 1101.5930 | 9      | -0.6 | 551.8035  | 2 | 27.25 | 3        | F3:1282 | OB5933 H2 raw.raw | 1.2465E4        | 2        | 2                   | 507   | 515 |                                  |                                                | PEAKS DB  |
| R.WLGLSAE(+53.92)YGNLYR.N                | N    | 45.19  | 1594.6866 | 13     | 0.4  | 532.5697  | 3 | 34.87 | 2        | F2:1718 | OB5932 H2 raw.raw | 1.8492E5        | 2        | 2                   | 388   | 400 | Replacement of 2 protons by iron | E7:Replacement of 2 protons by iron:156.85     | PEAKS PTM |

total 24 peptides



| Peptide                          | Uniq | -10lgP | Mass      | Length | ppm  | m/z      | z | RT    | Fraction | Scan    | Source File       | Area Raw Area 2 | #Feature | #Feature Raw Area 2 | Start | End | PTM                              | AScore                                                                          | Found By  |
|----------------------------------|------|--------|-----------|--------|------|----------|---|-------|----------|---------|-------------------|-----------------|----------|---------------------|-------|-----|----------------------------------|---------------------------------------------------------------------------------|-----------|
| R.N(+.98)ALFVPHYNTNAHSIIYALR.G   | N    | 41.98  | 2314.1858 | 20     | 3.6  | 772.4053 | 3 | 45.28 | 3        | F3:2182 | OB5933 H2 raw.raw | 6,3088E4        | 1        | 1                   | 401   | 420 |                                  | N1:Deamidation (NQ):32.94                                                       | PEAKS DB  |
| K.TAND(+53.92)LNLLILR.W          | N    | 41.37  | 1308.6488 | 11     | -1.1 | 655.3309 | 2 | 34.62 | 1        | F1:1597 | OB5921 H2 raw.raw | 1,4902E5        | 1        | 1                   | 377   | 387 | Replacement of 2 protons by iron | D4:Replacement of 2 protons by iron:128.79                                      | PEAKS PTM |
| N.G(+57.02)IETIC(+57.02)TASVKK.N | N    | 37.32  | 1491.7603 | 13     | 1.2  | 746.8883 | 2 | 27.43 | 3        | F3:1293 | OB5933 H2 raw.raw | 2,0504E4        | 1        | 1                   | 345   | 357 | Carbamidomethylation             | G1:Carbamidomethylation (DHKE, X@N-term):30.83; C7:Carbamidomethylation:1000.00 | PEAKS PTM |
| R.WLGLSAEYGN(+.98)LYR.N          | N    | 36.96  | 1541.7513 | 13     | 7.3  | 771.8886 | 2 | 52.84 | 1        | F1:2630 | OB5921 H2 raw.raw | 0               | 0        | 0                   | 388   | 400 | Deamidation (NQ)                 | N10:Deamidation (NQ):1000.00                                                    | PEAKS DB  |
| R.Q(-17.03)LKNNNPFK.F            | N    | 35.41  | 1084.5665 | 9      | 0.4  | 543.2908 | 2 | 28.36 | 3        | F3:1357 | OB5933 H2 raw.raw | 1,237E4         | 1        | 1                   | 507   | 515 | Pyro-glu from Q                  | Q1:Pyro-glu from Q:1000.00                                                      | PEAKS PTM |
| total 24 peptides                |      |        |           |        |      |          |   |       |          |         |                   |                 |          |                     |       |     |                                  |                                                                                 |           |

A1E2B1|A1E2B1\_ARAHY

back to list

| [Protein Coverage](#) | [Supporting Peptides](#) |

Protein Coverage:

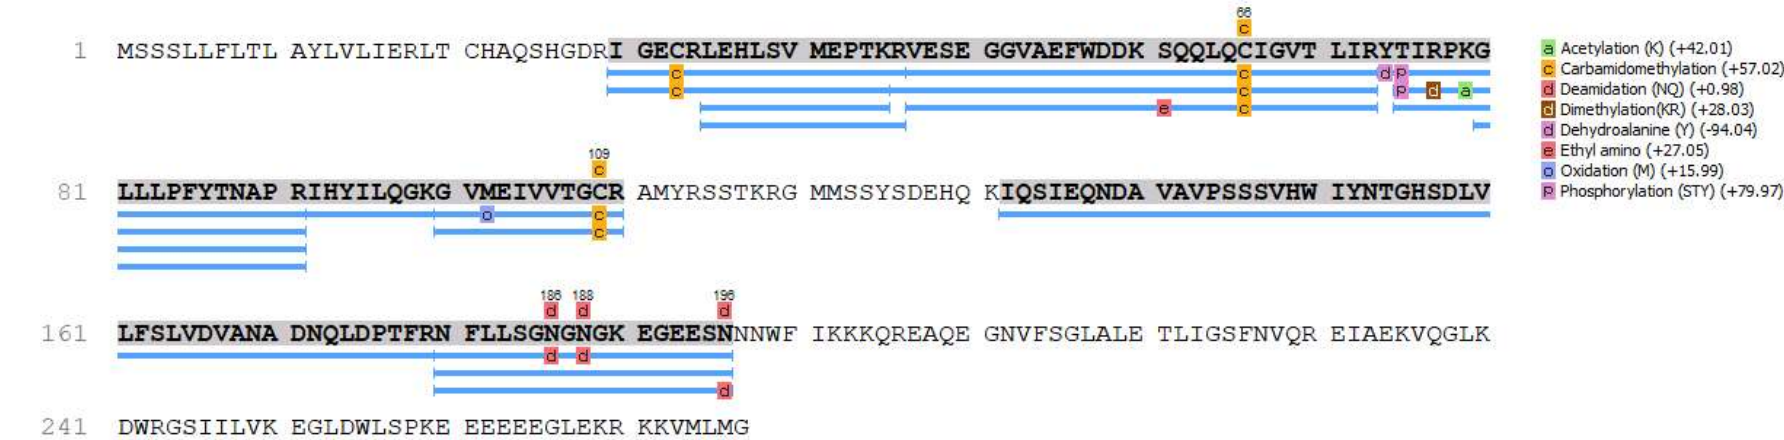

Supporting Peptides:

| Peptide                                    | Uniq | -10lgP | Mass      | Length | ppm  | m/z       | z | RT    | Fraction | Scan    | Source File       | Area Raw Area 2 | #Feature | #Feature Raw Area 2 | Start | End | PTM                  | AScore                           | Found By |
|--------------------------------------------|------|--------|-----------|--------|------|-----------|---|-------|----------|---------|-------------------|-----------------|----------|---------------------|-------|-----|----------------------|----------------------------------|----------|
| K.GLLLPFYTNAPR.I                           | Y    | 141.76 | 1360.7502 | 12     | -1.2 | 681.3816  | 2 | 35.39 | 3        | F3:1765 | OB5933 H2 raw.raw | 3,6865E6        | 3        | 3                   | 80    | 91  |                      |                                  | PEAKS DB |
| R.VESEG GVAEFWDDKSQQLQC(+57.02)IGVT LIR.Y  | Y    | 136.52 | 3063.4971 | 27     | 4.1  | 1022.1771 | 3 | 36.71 | 2        | F2:1824 | OB5932 H2 raw.raw | 9,8845E6        | 5        | 5                   | 47    | 73  | Carbamidomethylation | C20:Carbamidomethylation:1000.00 | PEAKS DB |
| K.RVESEG GVAEFWDDKSQQLQC(+57.02)IGVT LIR.Y | Y    | 122.38 | 3219.5981 | 28     | 2.3  | 1074.2091 | 3 | 35.76 | 3        | F3:1794 | OB5933 H2 raw.raw | 2,9779E6        | 4        | 4                   | 46    | 73  | Carbamidomethylation | C21:Carbamidomethylation:1000.00 | PEAKS DB |

total 21 peptides

| Peptide                                            | Uniq | -10lgP | Mass      | Length | ppm  | m/z       | z | RT    | Fraction | Scan    | Source File       | Area Raw Area 2 | #Feature | #Feature Raw Area 2 | Start | End | PTM                                 | AScore                                                     | Found By  |
|----------------------------------------------------|------|--------|-----------|--------|------|-----------|---|-------|----------|---------|-------------------|-----------------|----------|---------------------|-------|-----|-------------------------------------|------------------------------------------------------------|-----------|
| K.GVMEIVVTGC(+57.02)R.A                            | Y    | 109.83 | 1219.6053 | 11     | 1.8  | 610.8110  | 2 | 31.25 | 1        | F1:1386 | OB5921 H2 raw.raw | 9.381E5         | 3        | 3                   | 100   | 110 | Carbamidomethylation                | C10:Carbamidomethylation:1000.00                           | PEAKS DB  |
| R.LEHLSVMEPTK.R                                    | Y    | 103.36 | 1282.6591 | 11     | -0.9 | 642.3362  | 2 | 27.79 | 3        | F3:1323 | OB5933 H2 raw.raw | 1.5006E4        | 2        | 2                   | 35    | 45  |                                     |                                                            | PEAKS DB  |
| K.GVM(+15.99)EIVVTGC(+57.02)R.A                    | Y    | 91.34  | 1235.6002 | 11     | 2.0  | 618.8086  | 2 | 28.16 | 2        | F2:1326 | OB5932 H2 raw.raw | 5.5468E3        | 1        | 1                   | 100   | 110 | Oxidation (M); Carbamidomethylation | M3:Oxidation (M):1000.00; C10:Carbamidomethylation:1000.00 | PEAKS DB  |
| R.NFLLSGN(+.98)GN(+.98)GKEGEESN.N                  | Y    | 84.92  | 1766.7594 | 17     | 0.2  | 884.3871  | 2 | 30.77 | 2        | F2:1501 | OB5932 H2 raw.raw | 8.8395E4        | 1        | 1                   | 180   | 196 | Deamidation (NQ)                    | N7:Deamidation (NQ):96.06;N9:Deamidation (NQ):72.89        | PEAKS DB  |
| R.NFLLSGN(+.98)GKEGEESN.N                          | Y    | 79.73  | 1765.7754 | 17     | -0.1 | 883.8949  | 2 | 29.97 | 1        | F1:1326 | OB5921 H2 raw.raw | 8.6902E4        | 2        | 2                   | 180   | 196 |                                     | N9:Deamidation (NQ):39.76                                  | PEAKS DB  |
| R.IHYILQ GK.G                                      | Y    | 75.66  | 970.5600  | 8      | 0.7  | 486.2876  | 2 | 27.62 | 2        | F2:1288 | OB5932 H2 raw.raw | 3.1727E4        | 2        | 2                   | 92    | 99  |                                     |                                                            | PEAKS DB  |
| R.LEHLSVMEPTKR.V                                   | Y    | 75.18  | 1438.7603 | 12     | 0.4  | 720.3877  | 2 | 28.17 | 3        | F3:1338 | OB5933 H2 raw.raw | 4.4747E3        | 1        | 1                   | 35    | 46  |                                     |                                                            | PEAKS DB  |
| R.NFLLSGN(+.98)GNGKEGEESN(+.98).N                  | Y    | 72.91  | 1766.7594 | 17     | 0.2  | 884.3871  | 2 | 30.77 | 2        | F2:1462 | OB5932 H2 raw.raw | 1.261E5         | 2        | 2                   | 180   | 196 |                                     | N7:Deamidation (NQ):39.76;N17:Deamidation (NQ):47.16       | PEAKS DB  |
| R.IGEC(+57.02)RLEHLSVMEPTKR.V                      | Y    | 71.33  | 2054.0400 | 17     | -1.6 | 514.5165  | 4 | 30.02 | 2        | F2:1433 | OB5932 H2 raw.raw | 7.9524E4        | 3        | 3                   | 30    | 46  | Carbamidomethylation                | C4:Carbamidomethylation:1000.00                            | PEAKS DB  |
| R.IGEC(+57.02)RLEHLSVMEPTK.R                       | Y    | 67.02  | 1897.9390 | 16     | 0.1  | 633.6537  | 3 | 30.21 | 2        | F2:1441 | OB5932 H2 raw.raw | 3.8072E5        | 4        | 4                   | 30    | 45  | Carbamidomethylation                | C4:Carbamidomethylation:1000.00                            | PEAKS DB  |
| R.NFLLSGNNGKEGEESN(+.98).N                         | Y    | 62.96  | 1765.7754 | 17     | 1.0  | 883.8958  | 2 | 30.21 | 2        | F2:1414 | OB5932 H2 raw.raw | 9.4247E4        | 2        | 2                   | 180   | 196 |                                     | N17:Deamidation (NQ):23.01                                 | PEAKS DB  |
| R.NFLLSGN(+.98)GKEGEESN(+.98).N                    | Y    | 61.89  | 1766.7594 | 17     | 0.4  | 884.3873  | 2 | 30.59 | 3        | F3:1477 | OB5933 H2 raw.raw | 8.6083E4        | 1        | 1                   | 180   | 196 | Deamidation (NQ)                    | N9:Deamidation (NQ):30.36;N17:Deamidation (NQ):65.92       | PEAKS DB  |
| R.VESEGGVAEFWDK(+27.05)QQLQC(+57.02)IGVTILIR.Y     | Y    | 58.10  | 3090.5444 | 27     | -9.7 | 1031.1787 | 3 | 35.92 | 1        | F1:1673 | OB5921 H2 raw.raw | 1.3332E5        | 1        | 1                   | 47    | 73  | Ethyl amino; Carbamidomethylation   | S15:Ethyl amino:119.64;C20:Carbamidomethylation:1000.00    | PEAKS PTM |
| K.IQSIEQNDAVAVPSSSVHWIYNTGHSDLVFLVDVANADNQLDPTFR.N | Y    | 57.23  | 5281.5957 | 48     | 1.5  | 1321.4082 | 4 | 38.94 | 2        | F2:1947 | OB5932 H2 raw.raw | 2.1676E6        | 2        | 2                   | 132   | 179 |                                     |                                                            | PEAKS DB  |
| Y.TIRPK(+149.03)GLLLPFYTNAPR.I                     | Y    | 44.84  | 2105.1606 | 17     | -7.5 | 702.7222  | 3 | 34.98 | 1        | F1:1620 | OB5921 H2 raw.raw | 1.195E5         | 1        | 1                   | 75    | 91  |                                     | K5:Benzyliothiocyanate:4.73                                | PEAKS PTM |
| Y.T(+149.03)IRPKGLLLPFYTNAPR.I                     | Y    | 43.47  | 2105.1606 | 17     | -7.1 | 702.7225  | 3 | 34.97 | 2        | F2:1719 | OB5932 H2 raw.raw | 0               | 0        | 0                   | 75    | 91  |                                     | T1:Benzyliothiocyanate:5.74                                | PEAKS PTM |

total 21 peptides

| Peptide                                       | Uniq | -10lgP | Mass      | Length | ppm  | m/z      | z | RT    | Fraction | Scan    | Source File       | Area Raw Ara h 2 | #Feature | #Feature Raw Ara h 2 | Start | End | PTM                                                       | AScore                                                                                 | Found By  |
|-----------------------------------------------|------|--------|-----------|--------|------|----------|---|-------|----------|---------|-------------------|------------------|----------|----------------------|-------|-----|-----------------------------------------------------------|----------------------------------------------------------------------------------------|-----------|
| R.Y(-94.04)T(+79.97)IRPKGLLLPFYTNAPR.I        | Y    | 42.79  | 2105.1187 | 18     | 9.6  | 702.7202 | 3 | 34.85 | 3        | F3:1730 | OB5933 H2 raw.raw | 1.2657E6         | 1        | 1                    | 74    | 91  | Dehydroalanine (Y); Phosphorylation (STY)                 | Y1:Dehydroalanine (Y):69.38;T2:Phosphorylation (STY):71.87                             | PEAKS PTM |
| Y.T(+79.97)IR(+28.03)PK(+42.01)GLLLPFYTNAPR.I | Y    | 39.62  | 2106.1389 | 17     | -3.6 | 703.0510 | 3 | 35.25 | 3        | F3:1762 | OB5933 H2 raw.raw | 0                | 0        | 0                    | 75    | 91  | Phosphorylation (STY); Dimethylation(KR); Acetylation (K) | T1:Phosphorylation (STY):88.25;R3:Dimethylation(KR):153.36;K5:Acetylation (K):100.0.00 | PEAKS PTM |
| total 21 peptides                             |      |        |           |        |      |          |   |       |          |         |                   |                  |          |                      |       |     |                                                           |                                                                                        |           |

sp|Q647H2|AHY3\_ARAHY

back to list

| Protein Coverage | Supporting Peptides |

Protein Coverage:

1

MAKLLALSVC FCFLVLGASS VTFRQQGEEN ECQFQRLNAQ RPDNCIESEG GYIETWNPNN QEFQCAGVAL SRFVLRNAL

81

RRPFYSNAPQ EIFIYQSGSY FGLIFPGCPG TFEEPIQGSE QFQRPSRHFQ GQDQSQRPLD THQKVHGPRE GDLIAVPHGV

161

AFWIYNDQDT DVVAISVLHT NSLHNQLDQF PR**RFNLAGKQ EQEFLRYQQR** SGRQSPKGEE QEQQENEGG NVFSGFSTEF

241

LSHGFQVNED IVRNLRGENE REEQGAIVTV KGGLSILVPP EWRQSYQQPG RGDKDFN**NGI EETICTATVK** MNIGK**ST**SAD

321

**IYNPQAGSVR TVNELDLPIL NRLGLSAEYG SIHR**DAMFVP HYNMNANSMI YALHGGAHVQ VVDCNGNR**VF DEELQEGQSL**

401

**VVPQNFVAA KSQSEHFLYV AFK**TNSRASI SNLAGK**NSYM WNLPE**DVVAN SYGLQ**YE**QAR QLKNNNP**TF**LVP**PD**SQMI

481

**RTVA**

Carbamidomethylation (+57.02)

Carbamidomethylation (DHKE, X@N-term) (+57.02)

Supporting Peptides:

| Peptide                      | Uniq | -10lgP | Mass      | Length | ppm | m/z       | z | RT    | Fraction | Scan    | Source File       | Area Raw Ara h 2 | #Feature | #Feature Raw Ara h 2 | Start | End | PTM | AScore | Found By |
|------------------------------|------|--------|-----------|--------|-----|-----------|---|-------|----------|---------|-------------------|------------------|----------|----------------------|-------|-----|-----|--------|----------|
| K.NSYMWNLPEDVVANSYGLQYEQAR.Q | Y    | 129.97 | 2846.2969 | 24     | 2.1 | 1424.1587 | 2 | 36.85 | 3        | F3:1864 | OB5933 H2 raw.raw | 8.6777E5         | 4        | 4                    | 437   | 460 |     |        | PEAKS DB |
| K.SQSEHFLYVAFK.T             | Y    | 127.24 | 1454.7194 | 12     | 2.0 | 728.3684  | 2 | 31.80 | 1        | F1:1430 | OB5921 H2 raw.raw | 2.9709E6         | 6        | 6                    | 412   | 423 |     |        | PEAKS DB |
| R.TVNELDLPILNR.L             | Y    | 113.80 | 1395.7721 | 12     | 1.8 | 698.8946  | 2 | 34.50 | 2        | F2:1692 | OB5932 H2 raw.raw | 1.2891E7         | 3        | 3                    | 331   | 342 |     |        | PEAKS DB |
| R.LGLSAEYGSIHR.D             | Y    | 113.18 | 1301.6727 | 12     | 1.1 | 651.8444  | 2 | 28.72 | 3        | F3:1375 | OB5933 H2 raw.raw | 6.496E5          | 5        | 5                    | 343   | 354 |     |        | PEAKS DB |
| total 14 peptides            |      |        |           |        |     |           |   |       |          |         |                   |                  |          |                      |       |     |     |        |          |

| Peptide                          | Uniq | ~10lgP | Mass      | Length | ppm | m/z       | z | RT    | Fraction | Scan    | Source File       | Area Raw Area h 2 | #Feature | #Feature Raw Area h 2 | Start | End | PTM                                   | AScore                                                                        | Found By  |
|----------------------------------|------|--------|-----------|--------|-----|-----------|---|-------|----------|---------|-------------------|-------------------|----------|-----------------------|-------|-----|---------------------------------------|-------------------------------------------------------------------------------|-----------|
| N.GIEETIC(+57.02)TATVK.M         | N    | 103.68 | 1320.6595 | 12     | 0.2 | 661.3372  | 2 | 29.46 | 3        | F3:1405 | OB5933 H2 raw.raw | 2.7846E5          | 3        | 3                     | 299   | 310 | Carbamidomethylation                  | C7:Carbamidomethylation:1000.00                                               | PEAKS DB  |
| K.STSADIYNPQAGSVR.T              | Y    | 100.14 | 1564.7482 | 15     | 0.1 | 783.3814  | 2 | 27.43 | 3        | F3:1288 | OB5933 H2 raw.raw | 2.6144E5          | 3        | 3                     | 316   | 330 |                                       |                                                                               | PEAKS DB  |
| R.VFDEELQEGQLVVPQNFAVAAS.S       | Y    | 98.07  | 2517.2751 | 23     | 2.7 | 1259.6482 | 2 | 35.02 | 3        | F3:1751 | OB5933 H2 raw.raw | 1.6786E5          | 1        | 1                     | 389   | 411 |                                       |                                                                               | PEAKS DB  |
| K.NNNPFTFLVPPQDSQMIR.T           | Y    | 83.39  | 2117.0364 | 18     | 2.5 | 1059.5281 | 2 | 36.56 | 2        | F2:1814 | OB5932 H2 raw.raw | 0                 | 0        | 0                     | 464   | 481 |                                       |                                                                               | PEAKS DB  |
| K.NNNPFTFLVPPQDSQMIRT.V          | Y    | 69.26  | 2218.0840 | 19     | 2.9 | 1110.0525 | 2 | 36.48 | 1        | F1:1705 | OB5921 H2 raw.raw | 3.5597E5          | 2        | 2                     | 464   | 482 |                                       |                                                                               | PEAKS DB  |
| R.RFNLAGKQEQEFLR.Y               | Y    | 57.99  | 1734.9165 | 14     | 0.4 | 579.3130  | 3 | 30.03 | 3        | F3:1459 | OB5933 H2 raw.raw | 8.9519E4          | 2        | 2                     | 193   | 206 |                                       |                                                                               | PEAKS DB  |
| R.L(+57.02)GLSAEYGSIH.R.D        | Y    | 53.80  | 1358.6942 | 12     | 0.7 | 680.3549  | 2 | 29.11 | 2        | F2:1370 | OB5932 H2 raw.raw | 2.142E4           | 1        | 1                     | 343   | 354 | Carbamidomethylation (DHKE, X@N-term) | L1:Carbamidomethylation (DHKE, X@N-term):52.68                                | PEAKS PTM |
| V.PQNFAVAAS.S                    | N    | 51.53  | 944.5079  | 9      | 0.5 | 473.2615  | 2 | 32.25 | 3        | F3:1586 | OB5933 H2 raw.raw | 2.3208E6          | 2        | 2                     | 403   | 411 |                                       |                                                                               | PEAKS DB  |
| N.G(+57.02)IEETIC(+57.02)TATVK.M | N    | 44.11  | 1377.6809 | 12     | 0.2 | 689.8479  | 2 | 29.76 | 1        | F1:1306 | OB5921 H2 raw.raw | 0                 | 0        | 0                     | 299   | 310 | Carbamidomethylation                  | G1:Carbamidomethylation (DHKE, X@N-term):5.03;C7:Carbamidomethylation:1000.00 | PEAKS PTM |
| R.QLKNNNPFTFLVPPQDSQMIRT.V       | Y    | 34.68  | 2587.3218 | 22     | 0.0 | 863.4479  | 3 | 35.02 | 3        | F3:1753 | OB5933 H2 raw.raw | 2.6528E5          | 1        | 1                     | 461   | 482 |                                       |                                                                               | PEAKS DB  |
| total 14 peptides                |      |        |           |        |     |           |   |       |          |         |                   |                   |          |                       |       |     |                                       |                                                                               |           |

Q647H1|Q647H1\_ARAHY

back to list

| Protein Coverage | Supporting Peptides |

Protein Coverage:

1 MVIGPFRLSL CVCLVFLTSA CFGTRLEESF NECQLDRLNA LTPDNRIESQ GGITETWNSN HPELRCAGVT LLKRTIFPNG

81 FHLPSYANYP QLIFIAQGNG VFGVSLPGCP VTYEEAESQS REDRRQRIVI KRESEQEQEQ QGDSSHKIYH FRQGHLLAIP

161 AGVPYWSFNY GNEPIVAITL LDTSNLDNQL DSPRRFYLA GNPEEEHPET QQQQPQTRRR HGQHQQDEYG SQGEEEGNNV

241 LSGFSTQLLA HAFGVDEEIA RILQNPEQT KDQIVRVEGG FRDVISPRWG EGKQYEDELE ERQRQPPRRD EQGKGYDYDD

321 DRRPRHRQDP YREGDEDDRR PRGSRQGQGR GYDDDDRRPG QYEEGEEDDR RPRRSSRPKR QGRRHDDDDR RADEDDRRGY

401 DDDERRPDED DRRGYDDDER RPDDDDRQGY DDDRRRPRWS SRPKGQGRNG VEETLCSPTL VEDIARPSRA DFYNPAAGRI

481 SSANSLTFPI LRWFQLSAEH VLLYRNGIYS PHWNNNANSI IYGLRGEGR I QVNSQGNVAV FNGVLREGQI LLVPQNFAVG

561 KQAGNEGFEY VAFKTADRAS PATSSKCLGE SPLMFSSMLL AFEIIKSVLS NTMETRPLWS LLMIPSMGLN VVINLNHNHN

641 AQVDSKNNDG SRLWWPSSII IK

Diethylation (+56.06)

Supporting Peptides:

| Peptide                     | Uniq | -10lgP | Mass      | Length | ppm | m/z      | z | RT    | Fraction | Scan    | Source File       | Area Raw Ara h 2 | #Feature | #Feature Raw Ara h 2 | Start | End | PTM          | AScore                    | Found By  |
|-----------------------------|------|--------|-----------|--------|-----|----------|---|-------|----------|---------|-------------------|------------------|----------|----------------------|-------|-----|--------------|---------------------------|-----------|
| R.IQVVNSQGNVFNGLR.E         | Y    | 123.06 | 1813.9799 | 17     | 2.0 | 907.9990 | 2 | 32.81 | 2        | F2:1595 | OB5932 H2 raw.raw | 4.7427E5         | 2        | 2                    | 530   | 546 |              |                           | PEAKS DB  |
| R.WFQLSAEHLVLR.N            | Y    | 113.97 | 1660.8726 | 13     | 0.1 | 831.4436 | 2 | 34.98 | 1        | F1:1614 | OB5921 H2 raw.raw | 2.1298E5         | 2        | 2                    | 493   | 505 |              |                           | PEAKS DB  |
| R.ISSANSLTFILR.W            | Y    | 87.74  | 1417.7928 | 13     | 1.5 | 709.9048 | 2 | 34.24 | 1        | F1:1575 | OB5921 H2 raw.raw | 6.7566E5         | 3        | 3                    | 480   | 492 |              |                           | PEAKS DB  |
| R.ADFYNPAAGR.I              | Y    | 86.77  | 1080.4988 | 10     | 1.0 | 541.2572 | 2 | 28.15 | 1        | F1:1213 | OB5921 H2 raw.raw | 4.2854E3         | 1        | 1                    | 470   | 479 |              |                           | PEAKS DB  |
| R.EGVILLVPQNFAVGK.Q         | Y    | 74.17  | 1611.8984 | 15     | 0.5 | 806.9569 | 2 | 34.30 | 3        | F3:1712 | OB5933 H2 raw.raw | 5.2907E5         | 3        | 3                    | 547   | 561 |              |                           | PEAKS DB  |
| R.IQVVNSQGN(+.98)AVFNGVLR.E | Y    | 72.74  | 1814.9639 | 17     | 0.5 | 908.4896 | 2 | 33.38 | 2        | F2:1634 | OB5932 H2 raw.raw | 1.7282E4         | 1        | 1                    | 530   | 546 |              | N9:Deamidation (NQ):26.38 | PEAKS DB  |
| R.EGVILLVPQNFAVGK(+56.06).Q | Y    | 40.01  | 1667.9609 | 15     | 2.1 | 834.9895 | 2 | 34.69 | 2        | F2:1704 | OB5932 H2 raw.raw | 6.4471E6         | 3        | 3                    | 547   | 561 | Diethylation | K15:Diethylation:121.27   | PEAKS PTM |
| total 7 peptides            |      |        |           |        |     |          |   |       |          |         |                   |                  |          |                      |       |     |              |                           |           |

sp|Q6PSU2|CONG7\_ARAHY

back to list

[Protein Coverage](#) | [Supporting Peptides](#) |

Protein Coverage:

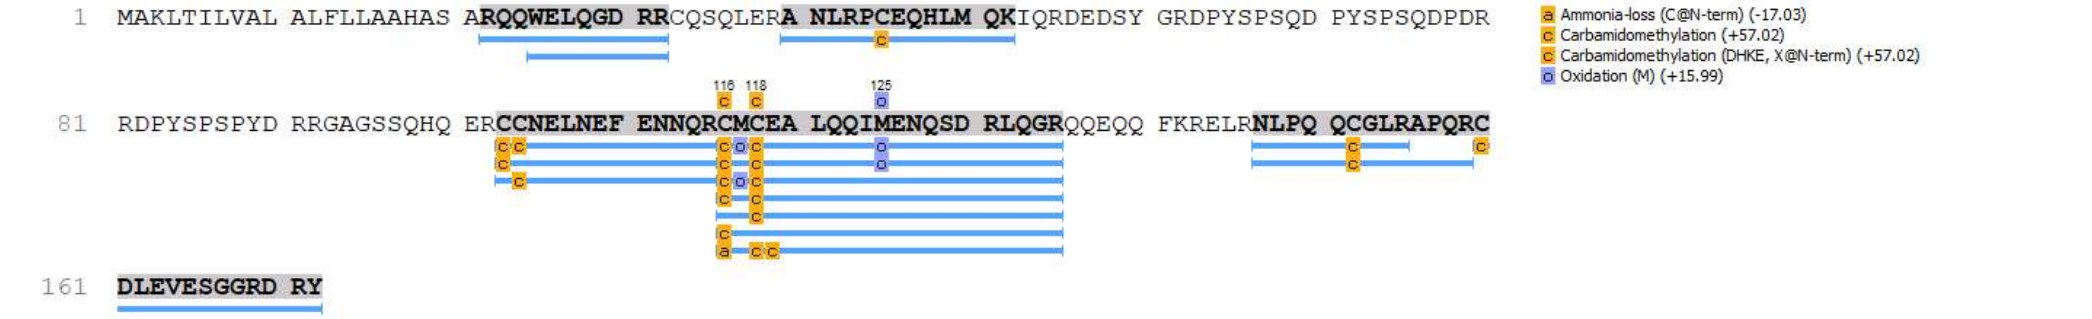

Supporting Peptides:

| Peptide                                  | Uniq | -10lgP | Mass      | Length | ppm  | m/z      | z | RT    | Fraction | Scan    | Source File       | Area Raw Ara h 2 | #Feature | #Feature Raw Ara h 2 | Start | End | PTM                  | AScore                                                          | Found By |
|------------------------------------------|------|--------|-----------|--------|------|----------|---|-------|----------|---------|-------------------|------------------|----------|----------------------|-------|-----|----------------------|-----------------------------------------------------------------|----------|
| R.C(+57.02)C(+57.02)NELNEFENNQR.C        | Y    | 115.71 | 1725.6835 | 13     | 0.8  | 863.8497 | 2 | 28.73 | 3        | F3:1378 | OB5933 H2 raw.raw | 2.2936E5         | 3        | 3                    | 103   | 115 | Carbamidomethylation | C1:Carbamidomethylation:1000.00;C2:Carbamidomethylation:1000.00 | PEAKS DB |
| R.C(+57.02)MC(+57.02)EALQQIMENQSDRLQGR.Q | Y    | 98.71  | 2466.0872 | 20     | 1.8  | 823.0378 | 3 | 33.56 | 3        | F3:1662 | OB5933 H2 raw.raw | 4.5608E6         | 6        | 6                    | 116   | 135 | Carbamidomethylation | C1:Carbamidomethylation:1000.00;C3:Carbamidomethylation:1000.00 | PEAKS DB |
| R.ANLRPC(+57.02)EQHLMQK.I                | Y    | 87.54  | 1623.7974 | 13     | -0.3 | 542.2729 | 3 | 28.69 | 1        | F1:1233 | OB5921 H2 raw.raw | 2.0501E5         | 3        | 3                    | 40    | 52  | Carbamidomethylation | C6:Carbamidomethylation:1000.00                                 | PEAKS DB |

total 16 peptides



| Peptide                                                  | Uniq | -10lgP | Mass      | Length | ppm  | m/z      | z | RT    | Fraction | Scan    | Source File       | Area Raw Area 2 | #Feature | #Feature Raw Area 2 | Start | End | PTM                                 | AScore                                                                                                             | Found By  |
|----------------------------------------------------------|------|--------|-----------|--------|------|----------|---|-------|----------|---------|-------------------|-----------------|----------|---------------------|-------|-----|-------------------------------------|--------------------------------------------------------------------------------------------------------------------|-----------|
| R.C(+71.04)C(+57.02)NELNEFENNQR.C                        | Y    | 78.59  | 1739.6992 | 13     | 1.2  | 870.8580 | 2 | 28.91 | 2        | F2:1352 | OB5932 H2 raw.raw | 7.6E4           | 1        | 1                   | 103   | 115 | Carbamidomethylation                | C1:Propionamide:0.00;C2:Carbamidomethylation:100.00                                                                | PEAKS PTM |
| R.C(+57.02)M(+15.99)C(+57.02)EALQQIMENQSDRLQGR.Q         | Y    | 73.14  | 2482.0820 | 20     | 2.0  | 828.3696 | 3 | 31.87 | 3        | F3:1563 | OB5933 H2 raw.raw | 9.6142E5        | 3        | 3                   | 116   | 135 | Carbamidomethylation; Oxidation (M) | C1:Carbamidomethylation:1000.00;M2:Oxidation (M):73.16;C3:Carbamidomethylation:1000.00                             | PEAKS DB  |
| R.C(+57.02)C(+71.04)NELNEFENNQR.C                        | Y    | 70.79  | 1739.6992 | 13     | -0.6 | 870.8563 | 2 | 28.69 | 1        | F1:1238 | OB5921 H2 raw.raw | 1.1347E5        | 2        | 2                   | 103   | 115 | Carbamidomethylation                | C1:Carbamidomethylation:1000.00;C2:Propionamide:0.00                                                               | PEAKS PTM |
| R.C(+57.02)MC(+57.02)EALQQIM(+15.99)ENQSDRLQGR.Q         | Y    | 65.02  | 2482.0820 | 20     | 1.4  | 828.3691 | 3 | 30.77 | 3        | F3:1501 | OB5933 H2 raw.raw | 2.8999E5        | 2        | 2                   | 116   | 135 | Carbamidomethylation; Oxidation (M) | C1:Carbamidomethylation:1000.00;C3:Carbamidomethylation:1000.00;M10:Oxidation (M):139.69                           | PEAKS DB  |
| R.C(+57.02)M(+15.99)C(+57.02)EALQQIM(+15.99)ENQSDRLQGR.Q | Y    | 61.41  | 2498.0771 | 20     | 1.7  | 833.7010 | 3 | 29.28 | 3        | F3:1401 | OB5933 H2 raw.raw | 1.0641E5        | 2        | 2                   | 116   | 135 | Carbamidomethylation; Oxidation (M) | C1:Carbamidomethylation:1000.00;M2:Oxidation (M):1000.00;C3:Carbamidomethylation:1000.00;M10:Oxidation (M):1000.00 | PEAKS DB  |
| R.C(+71.04)MC(+57.02)EALQQIMENQSDRLQGR.Q                 | Y    | 59.16  | 2480.1028 | 20     | 0.4  | 827.7086 | 3 | 33.68 | 1        | F1:1538 | OB5921 H2 raw.raw | 1.409E5         | 1        | 1                   | 116   | 135 | Carbamidomethylation                | C1:Propionamide:32.28;C3:Carbamidomethylation:1000.00                                                              | PEAKS PTM |
| R.C(+57.02)DLEVESGGRDRY                                  | Y    | 56.07  | 1554.6732 | 13     | 1.2  | 778.3448 | 2 | 27.26 | 2        | F2:1261 | OB5932 H2 raw.raw | 3.8274E4        | 2        | 2                   | 160   | 172 | Carbamidomethylation                | C1:Carbamidomethylation:1000.00                                                                                    | PEAKS DB  |
| R.C(+57.02)MC(+71.04)EALQQIMENQSDRLQGR.Q                 | Y    | 54.75  | 2480.1028 | 20     | 1.1  | 827.7091 | 3 | 33.56 | 3        | F3:1664 | OB5933 H2 raw.raw | 7.0183E5        | 2        | 2                   | 116   | 135 | Carbamidomethylation                | C1:Carbamidomethylation:1000.00;C3:Propionamide:13.45                                                              | PEAKS PTM |
| R.NLPQQC(+57.02)GLR.A                                    | Y    | 53.37  | 1084.5448 | 9      | 0.2  | 543.2798 | 2 | 25.65 | 2        | F2:1166 | OB5932 H2 raw.raw | 7.6965E4        | 2        | 2                   | 147   | 155 | Carbamidomethylation                | C6:Carbamidomethylation:1000.00                                                                                    | PEAKS DB  |

total 16 peptides

| Peptide                                          | Uniq | -10lgP | Mass      | Length | ppm  | m/z       | z | RT    | Fraction | Scan    | Source File       | Area Raw Area h 2 | #Feature | #Feature Raw Area h 2 | Start | End | PTM                                                                                  | AScore                                                                                                            | Found By  |
|--------------------------------------------------|------|--------|-----------|--------|------|-----------|---|-------|----------|---------|-------------------|-------------------|----------|-----------------------|-------|-----|--------------------------------------------------------------------------------------|-------------------------------------------------------------------------------------------------------------------|-----------|
| R.C(-17.03)MC(+57.02)E(+57.02)ALQQIMENQSDRLQGR.Q | Y    | 42.30  | 2449.0608 | 20     | -1.7 | 1225.5356 | 2 | 37.66 | 2        | F2:1881 | OB5932 H2 raw.raw | 0                 | 0        | 0                     | 116   | 135 | Ammonia-loss (C@N-term); Carbamidomethylation; Carbamidomethylation (DHKE, X@N-term) | C1:Ammonia-loss (C@N-term):1000.00;C3:Carbamidomethylation:1000.00;E4:Carbamidomethylation (DHKE, X@N-term):72.07 | PEAKS PTM |
| R.NLPQQC(+57.02)GLRAPQR.C                        | Y    | 41.36  | 1536.7943 | 13     | 0.3  | 513.2722  | 3 | 27.16 | 2        | F2:1257 | OB5932 H2 raw.raw | 2.6104E4          | 2        | 2                     | 147   | 159 | Carbamidomethylation                                                                 | C6:Carbamidomethylation:1000.00                                                                                   | PEAKS DB  |
| Q.WELQGDRR.C                                     | Y    | 37.54  | 1058.5258 | 8      | -0.7 | 530.2698  | 2 | 27.08 | 2        | F2:1254 | OB5932 H2 raw.raw | 1.2218E4          | 2        | 2                     | 25    | 32  |                                                                                      |                                                                                                                   | PEAKS DB  |
| A.RQQWELQGDRR.C                                  | Y    | 33.61  | 1470.7440 | 11     | 1.1  | 491.2558  | 3 | 27.61 | 3        | F3:1301 | OB5933 H2 raw.raw | 5.9603E4          | 1        | 1                     | 22    | 32  |                                                                                      |                                                                                                                   | PEAKS DB  |
| total 16 peptides                                |      |        |           |        |      |           |   |       |          |         |                   |                   |          |                       |       |     |                                                                                      |                                                                                                                   |           |

A5Z1R0|A5Z1R0\_ARAHY

back to list

| Protein Coverage | Supporting Peptides |

Protein Coverage:

1MAKSTILVAL LALVLVAHAS AMRRERGRQG DSSSCERQVD RVNLKPCEQH IMQR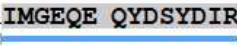IMGEQE QYDSYDIRST RSSDQQQRCC

81DELNEMENTQ RCMCEALQQI MENQCDRLQD RQMVQQFKRELMNLPQQCNF RAPQRCDLDV SGGRC

Supporting Peptides:

| Peptide                  | Uniq | -10lgP | Mass      | Length | ppm | m/z      | z | RT    | Fraction | Scan    | Source File       | Area Raw Area h 2 | #Feature | #Feature Raw Area h 2 | Start | End | PTM                  | AScore                          | Found By |
|--------------------------|------|--------|-----------|--------|-----|----------|---|-------|----------|---------|-------------------|-------------------|----------|-----------------------|-------|-----|----------------------|---------------------------------|----------|
| R.ELMNLPQQC(+57.02)NFR.A | Y    | 111.29 | 1548.7177 | 12     | 1.2 | 775.3671 | 2 | 31.14 | 3        | F3:1524 | OB5933 H2 raw.raw | 1.8769E5          | 3        | 3                     | 120   | 131 | Carbamidomethylation | C9:Carbamidomethylation:1000.00 | PEAKS DB |
| R.IMGEQEYDSYDIR.S        | Y    | 108.32 | 1745.7566 | 14     | 0.6 | 873.8861 | 2 | 30.21 | 2        | F2:1444 | OB5932 H2 raw.raw | 1.0015E5          | 3        | 3                     | 55    | 68  |                      |                                 | PEAKS DB |
| total 2 peptides         |      |        |           |        |     |          |   |       |          |         |                   |                   |          |                       |       |     |                      |                                 |          |

sp|Q647G9|CONG\_ARAHY

back to list

| Protein Coverage | Supporting Peptides |

Protein Coverage:

1MAKSTILVAL LALVLVAHAS AMRRERGRQG DSSSCERQVD RVNLKPCEQH IMQR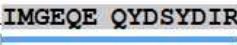IMGEQE QYDSYDIRST RSSDQQQRCC

81DELNEMENTQ RCMCEALQQI MENQCDRLQD RQMVQQFKRELMNLPQQCNF RAPQRCDLDV SGGRC

Supporting Peptides:

| Peptide          | Uniq | -10lgP | Mass | Length | ppm | m/z | z | RT | Fraction | Scan | Source File | Area Raw Area h 2 | #Feature | #Feature Raw Area h 2 | Start | End | PTM | AScore | Found By |
|------------------|------|--------|------|--------|-----|-----|---|----|----------|------|-------------|-------------------|----------|-----------------------|-------|-----|-----|--------|----------|
| total 2 peptides |      |        |      |        |     |     |   |    |          |      |             |                   |          |                       |       |     |     |        |          |

| Peptide                  | Uniq | -10lgP | Mass      | Length | ppm | m/z      | z | RT    | Fraction | Scan    | Source File       | Area Raw Area 2 | #Feature | #Feature Raw Area 2 | Start | End | PTM                  | AScore                          | Found By |
|--------------------------|------|--------|-----------|--------|-----|----------|---|-------|----------|---------|-------------------|-----------------|----------|---------------------|-------|-----|----------------------|---------------------------------|----------|
| R.ELMNLPQQC(+57.02)NFR.A | Y    | 111.29 | 1548.7177 | 12     | 1.2 | 775.3671 | 2 | 31.14 | 3        | F3:1524 | OB5933 H2 raw.raw | 1.8769E5        | 3        | 3                   | 120   | 131 | Carbamidomethylation | C9:Carbamidomethylation:1000.00 | PEAKS DB |
| R.IMGEQEYDSYDIR.S        | Y    | 108.32 | 1745.7566 | 14     | 0.6 | 873.8861 | 2 | 30.21 | 2        | F2:1444 | OB5932 H2 raw.raw | 1.0015E5        | 3        | 3                   | 55    | 68  |                      |                                 | PEAKS DB |
| total 2 peptides         |      |        |           |        |     |          |   |       |          |         |                   |                 |          |                     |       |     |                      |                                 |          |

## N1NJN8|N1NJN8\_ARAHY

[back to list](#)

**Protein Coverage | Supporting Peptides**

### Protein Coverage:

1 MECVFGLVGK GFAIVVADTS AVHGILVHKT NEEKIMKLDLS HKLMAASGEG GDRVQFTEYI LK**Q**VALYQFR NGIPLTTSAA ■ Deamidation (NQ) (+0.98)

81 **A**NFTRAELEAA ALRKLVGVVF VQNPYAVNIL LAGYDNHTGP SLYYIDYLAT LHKVDKAAFG YASYFSLSIM DTHYHAGMSL

161 QEAILDVKC ITEIRSR**L**VV APPN**F**VIKIV DQHGARECAW RQSLPSASPT FIHN

### Supporting Peptides:

| Peptide                           | Uniq | -10lgP | Mass      | Length | ppm  | m/z      | z | RT    | Fraction | Scan    | Source File          | Area Raw<br>Ara h 2 | #Feature | #Feature Raw<br>Ara h 2 | Start | End | PTM                 | AScore                                       | Found<br>By  |
|-----------------------------------|------|--------|-----------|--------|------|----------|---|-------|----------|---------|----------------------|---------------------|----------|-------------------------|-------|-----|---------------------|----------------------------------------------|--------------|
| K.NVALYQFR.N                      | Y    | 79.34  | 1009.5345 | 8      | -0.1 | 505.7745 | 2 | 30.58 | 2        | F2:1470 | OB5932 H2<br>raw.raw | 1.2272E4            | 1        | 1                       | 63    | 70  |                     |                                              | PEAKS<br>DB  |
| R.LVVAPPNFVIK.I                   | Y    | 64.66  | 1195.7328 | 11     | 0.7  | 598.8741 | 2 | 33.55 | 2        | F2:1641 | OB5932 H2<br>raw.raw | 2.964E5             | 2        | 2                       | 178   | 188 |                     |                                              | PEAKS<br>DB  |
| R.N(+.98)GIPLTTS(-15.99)AAANFTR.A | Y    | 48.15  | 1517.7838 | 15     | 1.8  | 759.9005 | 2 | 33.86 | 1        | F1:1554 | OB5921 H2<br>raw.raw | 4.327E4             | 1        | 1                       | 71    | 85  | Deamidation<br>(NQ) | N1:Deamidation (NQ):81.94;S8:<br>Deoxy:24.44 | PEAKS<br>PTM |
| total 3 peptides                  |      |        |           |        |      |          |   |       |          |         |                      |                     |          |                         |       |     |                     |                                              |              |

**#CONTAM#P00761**

[back to list](#)

**Protein Coverage | Supporting Peptides**

### Protein Coverage:

1 FPTDDDDKIV GGYTCAANSI PYQVSLNSGS HFCGGSLSINS QWVVSAAHCY KSRIQVRLGE HNIDVLEGNQ QFINAAKIIT  
81 HPNFNGNTLD NDIMLIKLS PATLNSRVAT VSLPRSCAAA GTECLISGWG NTKSSGSSYP SLLQCLKAPV LSDSSCKSSY  
161 PGQITGNMIC VGFLEGGKDS CQGDSGGPVV CNGQLQGIYS WGYGCAQKNK PGVYTKVCNY VNWIQQOTIAA N

### Supporting Peptides:

[illegible]

## Q1PCR5|Q1PCR5\_ARAHY

[back to list](#)

**Protein Coverage | Supporting Peptides**

### Protein Coverage:



1 SDRSHAPPVV MAAAGFRLAD TFHTGASMGG YISSQSVKKI IEINPYMLGT MAGGAADCQF WHRNLGIKCR LHELANKRRI  
81 SVTGASKLLA NILYSYRGMG LSVGTMIAGW DETGPGLYYV DSEGGRLKGT RFSVGSGSPY AYGILDSGYR YDLSVDEAVE  
161 LGRRAIYHAT FRD GASGGVV SVYHVGPEGW KKWTGDDVGD LHYQYYPVVP STVEQEMAEA TGA

Supporting Peptides:

| Peptide                 | Uniq | -10lgP | Mass      | Length | ppm  | m/z      | z | RT    | Fraction | Scan    | Source File       | Area Raw Ara h 2 | #Feature | #Feature Raw Ara h 2 | Start | End | PTM | AScore | Found By |
|-------------------------|------|--------|-----------|--------|------|----------|---|-------|----------|---------|-------------------|------------------|----------|----------------------|-------|-----|-----|--------|----------|
| K.LLANILYSYR.G          | Y    | 76.10  | 1224.6866 | 10     | 1.0  | 613.3512 | 2 | 34.31 | 2        | F2:1690 | OB5932 H2 raw.raw | 7.006E4          | 2        | 2                    | 88    | 97  |     |        | PEAKS DB |
| R.DGASGGVSVYHVGPEGWKK.W | Y    | 34.60  | 2028.0065 | 20     | -1.1 | 677.0087 | 3 | 30.03 | 3        | F3:1461 | OB5933 H2 raw.raw | 2.4672E4         | 1        | 1                    | 173   | 192 |     |        | PEAKS DB |
| total 2 peptides        |      |        |           |        |      |          |   |       |          |         |                   |                  |          |                      |       |     |     |        |          |

Peptide List

Summary

1. Notes Ara h 2 GEL BAND ROASTED

Roasted Ara h 2 band also conatins a lot of Ara h 3 allergens and Ara h 2 is alos on the sixts lace per CIX cruve area s as in raw arah 2 file.

2. Result Statistics

Figure 1. False discovery rate (FDR) curve. X axis is the number of peptides being kept. Y axis is the corresponding FDR.

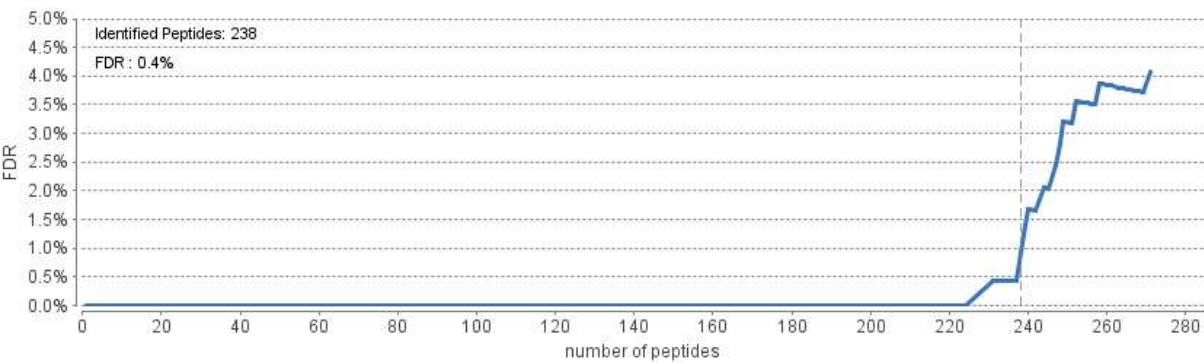

Figure 2. PSM score distribution. (a) Distribution of PEAKS peptide score; (b) Scatterplot of PEAKS peptide score versus precursor mass error.

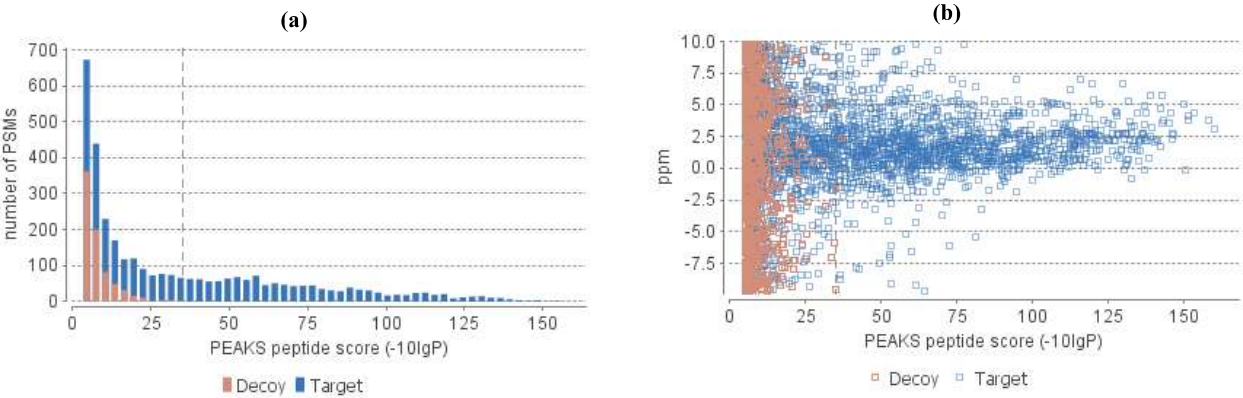

Table 1. Statistics of data.

|  | #Scans | #Features | Identified | #Peptides | #Sequences |
|--|--------|-----------|------------|-----------|------------|
|--|--------|-----------|------------|-----------|------------|

|                  |      |       |          |      |       |        |             |     |     | proteins   |    |    |
|------------------|------|-------|----------|------|-------|--------|-------------|-----|-----|------------|----|----|
|                  | MS1  | MS/MS | #Chimera |      | #PSMs | #Scans | #Features** |     |     | #Proteins* |    |    |
| Total            | 6754 | 4932  | 742      | 8080 | 1299  | 1283   | 558         | 238 | 141 | 12         | 17 | 14 |
| Roast<br>Ara h 2 | 6754 | 4932  | 742      | 8080 | 1299  | 1283   | 558         | 238 | 141 | 12         | 17 | 14 |

\* proteins with significant peptides are used in counts.  
\*\* features are identified by DB search only.

Figure 3. Sample overlap for Proteins and Peptides (up to 8 samples). (a) All Proteins; (b) Top Proteins; (c) Peptides; ?

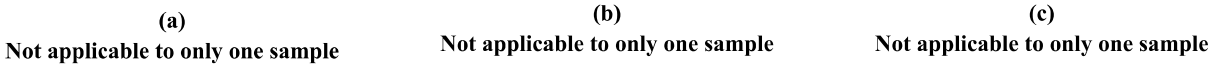

Figure 4. Distribution of peptide feature detection. (a) Feature m/z distribution; (b) Feature RT distribution.

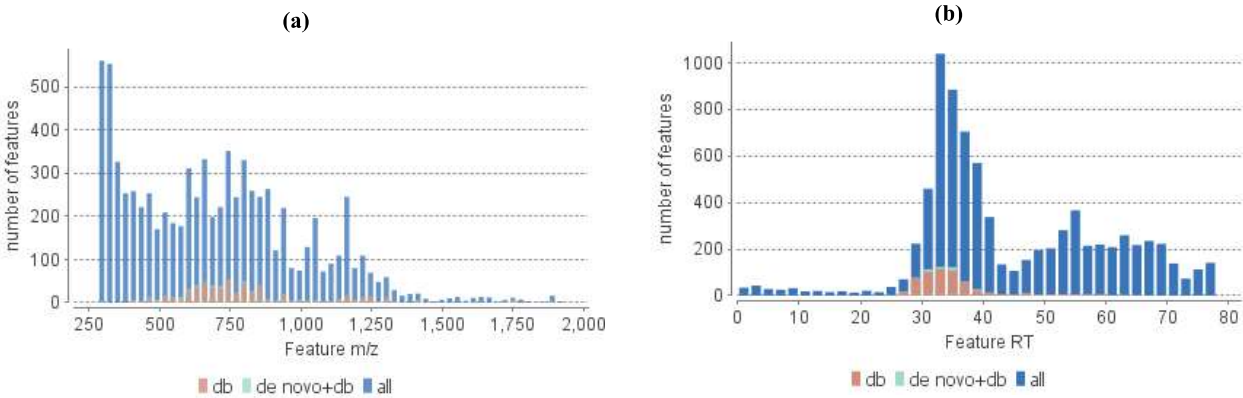

Figure 5. Distribution of identified peptide features. (a) Feature abundance distribution; (b) De novo sequencing validation. ?

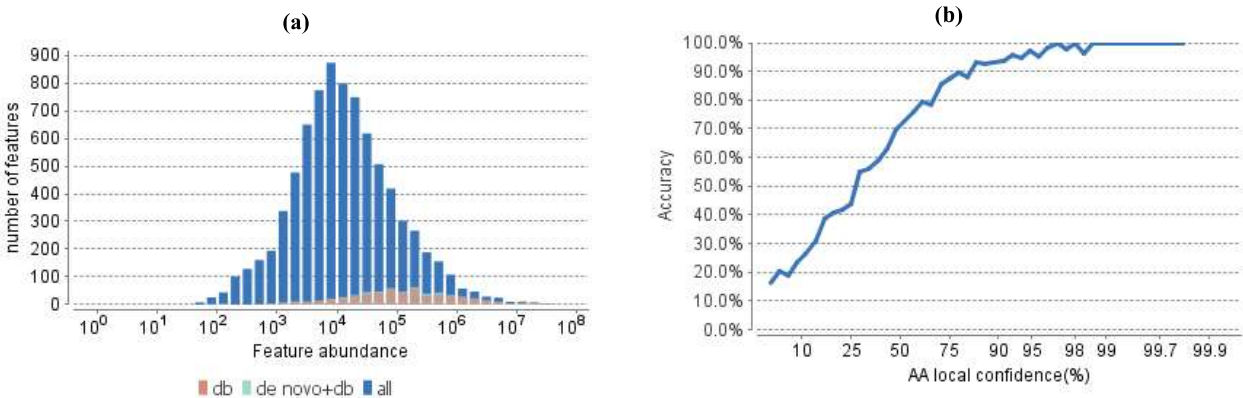

**Table 2.** Result filtration parameters.

|                          |       |
|--------------------------|-------|
| Peptide -10lgP           | ≥35.1 |
| PTM Ascore               | ≥50   |
| Protein -10lgP           | ≥20   |
| Proteins unique peptides | ≥2    |
| De novo score(%)         | ≥50%  |

**Table 3.** Statistics of filtered result.

|                                |      |
|--------------------------------|------|
| FDR (Peptide-Spectrum Matches) | 0.1% |
| FDR (Peptide Sequences)        | 0.4% |
| FDR (Protein Group)            | 0.0% |
| De Novo Only Spectra           | 52   |

**Table 4.** PTM profile.

| Name                | ΔMass  | Position   | #PSM | -10lgP | Abundance | AScore  |
|---------------------|--------|------------|------|--------|-----------|---------|
| Carbamidomethyl     | 57.02  | C          | 131  | 121.98 | 1.31E5    | 1000.00 |
| Deamidation         | .98    | NQ         | 71   | 160.37 | 9.54E5    | 180.29  |
| Oxidation           | 15.99  | M          | 42   | 126.44 | 1.15E6    | 1000.00 |
| Carbamidomethyl     | 57.02  | DEH,N-term | 41   | 132.85 | 4.74E5    | 0.00    |
| Propionamide        | 71.04  | C          | 14   | 94.71  | 9.26E3    | 9.34    |
| Dimethylation(KR)   | 28.03  | KR         | 13   | 151.29 | 3.06E6    | 1000.00 |
| Methylation(others) | 14.02  | DH         | 12   | 93.74  | 5.81E5    | 18.00   |
| Ethyl               | 28.03  | E,N-term   | 10   | 74.92  | 8.8E5     | 42.22   |
| Cation:Fe[II]       | 53.92  | DE         | 9    | 69.70  | 2.33E5    | 154.98  |
| Oxidation           | 15.99  | PR         | 8    | 76.27  | 8.19E5    | 0.00    |
| Amidine             | 41.03  | N-term     | 6    | 63.11  | 1.55E4    | 96.48   |
| Sodium              | 21.98  | DE         | 6    | 60.96  | 2.76E4    | 0.00    |
| Ammonia loss        | -17.03 | N-term     | 5    | 61.66  | 2.21E5    | 1000.00 |
| Pyro-glu from Q     | -17.03 | N-term     | 5    | 67.76  | 4.21E3    | 1000.00 |
| Dihydroxy           | 31.99  | WY         | 4    | 103.31 | 7.44E4    | 44.28   |
| Acetylation         | 42.01  | N-term     | 2    | 42.71  | 2.74E5    | 1000.00 |
| Diethylation        | 56.06  | K          | 2    | 48.11  | 4.01E5    | 121.40  |
| Dehydration         | -18.01 | S          | 1    | 52.68  | 3.08E4    | 14.04   |
| Phosphorylation     | 79.97  | T          | 1    | 41.04  | 1.88E5    | 71.87   |
| BITC                | 149.03 | K          | 1    | 52.86  | 5.13E4    | 22.37   |
| Carboxylation       | 43.99  | E          | 1    | 39.76  |           | 1000.00 |
| Methylation(KR)     | 14.02  | R          | 1    | 42.71  | 2.74E5    | 1000.00 |

proteins

### 3. Experiment Control

**Figure 6.** Precursor mass error of peptide-spectrum matches (PSM) in filtered result. **(a)** Distribution of precursor mass error in ppm; **(b)** Scatterplot of precursor m/z versus precursor mass error in ppm. [?](#)

**(a)**

**(b)**

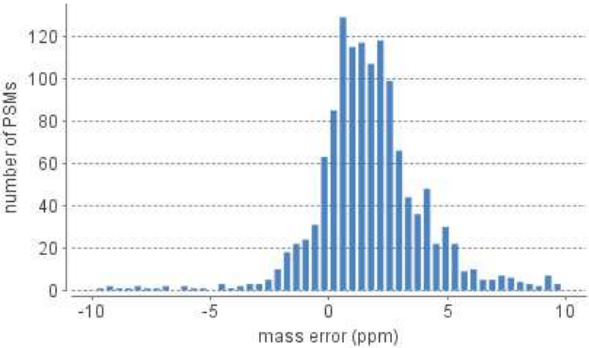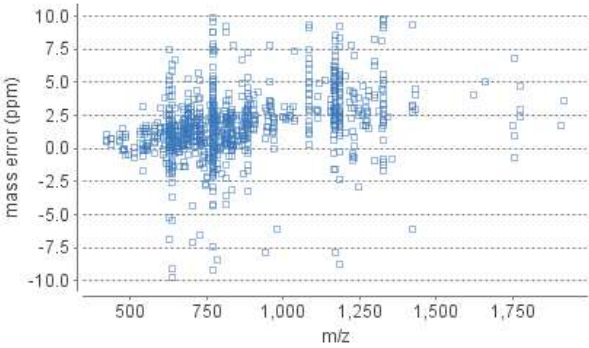

**Table 5.** Number of identified peptides in each sample by the number of missed cleavages.

| Missed Cleavages | 0   | 1  | 2  | 3 | 4+ |
|------------------|-----|----|----|---|----|
| Roast Ara h 2    | 147 | 76 | 15 | 0 | 0  |

4. Other Information

**Table 6.** Search parameters.  
PEAKS Version: PEAKS Studio 10.6 build 20201015  
Search Engine Name: PEAKS  
Parent Mass Error Tolerance: 10.0 ppm  
Fragment Mass Error Tolerance: 0.5 Da  
Precursor Mass Search Type: monoisotopic  
Enzyme: Trypsin  
Max Missed Cleavages: 2  
Digest Mode: Semispecific  
Fixed Modifications:  
  Carbamidomethylation: 57.02  
Variable Modifications:  
  Oxidation (M): 15.99  
  Deamidation (NQ): 0.98  
  Acetylation (K): 42.01  
  Acetylation (Protein N-term): 42.01  
  Acetylation (N-term): 42.01  
  Amidation: -0.98  
  Beta-methylthiolation: 45.99  
  Biotinylation: 226.08  
  and 303 more...  
Max Variable PTM Per Peptide: 5  
Database: Uniprot\_Peanut-3818\_Jul18  
Taxon: All  
Contaminant Database: contam MQ  
Searched Entry: 1723  
FDR Estimation: Enabled  
De novo score(%) threshold: 15  
Peptide hit threshold (-10logP): 30.0

**Table 7.** Instrument parameters.  
Fractions: OB5922 H2 Ro.raw, OB5945 H2 Ro.raw, OB5946 H2 Ro.raw  
  
Ion Source: ESI(nano-spray)  
Fragmentation Mode: CID, CAD(y and b ions)  
MS Scan Mode: FT-ICR/Orbitrap  
MS/MS Scan Mode: FT-ICR/Orbitrap

Peaks run ID: 30  
Merge Options: no merge  
Precursor Options: corrected  
Charge Options: no correction  
Filter m/z: 200.0 - 2000.0  
Filter Charge: 2 - 12  
Process: true  
Associate chimera: yes

Protein List

Protein Accession Contains:  
Protein Description Contains:  
Protein Sample Area >=  
Protein PTM Contains:

| Protein Group     | Protein ID | Accession                             | -10lgP | Coverage (%) | Coverage (%) Roast Ara h 2 | Area Roast Ara h 2 | #Peptides | #Unique | #Spec Roast Ara h 2 | PTM | Avg. Mass | Description                                                        |
|-------------------|------------|---------------------------------------|--------|--------------|----------------------------|--------------------|-----------|---------|---------------------|-----|-----------|--------------------------------------------------------------------|
| 1                 | 3          | <a href="#">A1DZF0 A1DZF0_ARAHY</a>   | 485.56 | 41           | 41                         | 8.3772E6           | 28        | 6       | 497                 | Y   | 60375     | Arachin 6 OS=Arachis hypogaea OX=3818 PE=2 SV=1                    |
| 8                 | 1          | <a href="#">Q6IWG5 Q6IWG5_ARAHY</a>   | 464.33 | 42           | 42                         | 1.4872E8           | 21        | 19      | 273                 | Y   | 58061     | Glycinin (Fragment) OS=Arachis hypogaea OX=3818 PE=2 SV=1          |
| 8                 | 2          | <a href="#">Q0GM57 Q0GM57_ARAHY</a>   | 464.33 | 42           | 42                         | 1.4872E8           | 21        | 19      | 273                 | Y   | 58263     | Iso-Ara h3 OS=Arachis hypogaea OX=3818 PE=2 SV=1                   |
| 6                 | 10         | <a href="#">Q9FZ11 Q9FZ11_ARAHY</a>   | 460.73 | 34           | 34                         | 2.2384E6           | 22        | 3       | 367                 | Y   | 60449     | Gly1 OS=Arachis hypogaea OX=3818 GN=Gly1 PE=2 SV=1                 |
| 3                 | 9          | <a href="#">Q647H3 Q647H3_ARAHY</a>   | 459.83 | 40           | 40                         | 6.7933E7           | 23        | 4       | 412                 | Y   | 61532     | Arachin Ahy-2 OS=Arachis hypogaea OX=3818 PE=2 SV=1                |
| 5                 | 7          | <a href="#">Q8LKN1 Q8LKN1_ARAHY</a>   | 435.43 | 40           | 40                         | 2.7383E5           | 21        | 2       | 368                 | Y   | 61738     | Allergen Arah3/Arah4 OS=Arachis hypogaea OX=3818 PE=3 SV=1         |
| 10                | 12         | <a href="#">E9LFE8 E9LFE8_ARAHY</a>   | 407.17 | 55           | 55                         | 2.2478E7           | 14        | 14      | 95                  | Y   | 28290     | 11S arachin (Fragment) OS=Arachis hypogaea OX=3818 PE=2 SV=1       |
| 11                | 8          | <a href="#">sp Q647H2 AHY3_ARAHY</a>  | 371.36 | 33           | 33                         | 9.1524E6           | 13        | 11      | 70                  | Y   | 54569     | Arachin Ahy-3 OS=Arachis hypogaea OX=3818 PE=1 SV=1                |
| 15                | 14         | <a href="#">Q647H1 Q647H1_ARAHY</a>   | 313.27 | 15           | 15                         | 2.7735E6           | 8         | 8       | 25                  | Y   | 75933     | Conarachin OS=Arachis hypogaea OX=3818 PE=2 SV=1                   |
| 16                | 25         | <a href="#">A1E2B1 A1E2B1_ARAHY</a>   | 258.34 | 49           | 49                         | 1.8619E6           | 7         | 7       | 17                  | Y   | 31268     | 11S seed storage globulin B2 OS=Arachis hypogaea OX=3818 PE=2 SV=1 |
| 17                | 27         | <a href="#">A5Z1R0 A5Z1R0_ARAHY</a>   | 220.47 | 34           | 34                         | 6.8329E5           | 4         | 4       | 16                  | Y   | 16920     | Ara h 6 allergen OS=Arachis hypogaea OX=3818 GN=Ara h 6 PE=4 SV=1  |
| 17                | 28         | <a href="#">sp Q647G9 CONG_ARAHY</a>  | 220.47 | 34           | 34                         | 6.8329E5           | 4         | 4       | 16                  | Y   | 16920     | Conglutin OS=Arachis hypogaea OX=3818 PE=1 SV=1                    |
| 12                | 24         | <a href="#">sp Q6PSU2 CONG7_ARAHY</a> | 203.38 | 38           | 38                         | 4.8478E6           | 5         | 5       | 40                  | Y   | 20114     | Conglutin-7 OS=Arachis hypogaea OX=3818 PE=1 SV=2                  |
| 18                | 29         | <a href="#">#CONTAM#P00761</a>        | 107.34 | 11           | 11                         | 3.2741E5           | 2         | 2       | 10                  | N   | 24409     | SWISS-PROT: #CONTAM#P00761 TRYP_PIG Trypsin - Sus scrofa (Pig).    |
| total 14 proteins |            |                                       |        |              |                            |                    |           |         |                     |     |           |                                                                    |

A1DZF0|A1DZF0\_ARAHY

[back to list](#)

| [Protein Coverage](#) | [Supporting Peptides](#) |

Protein Coverage:

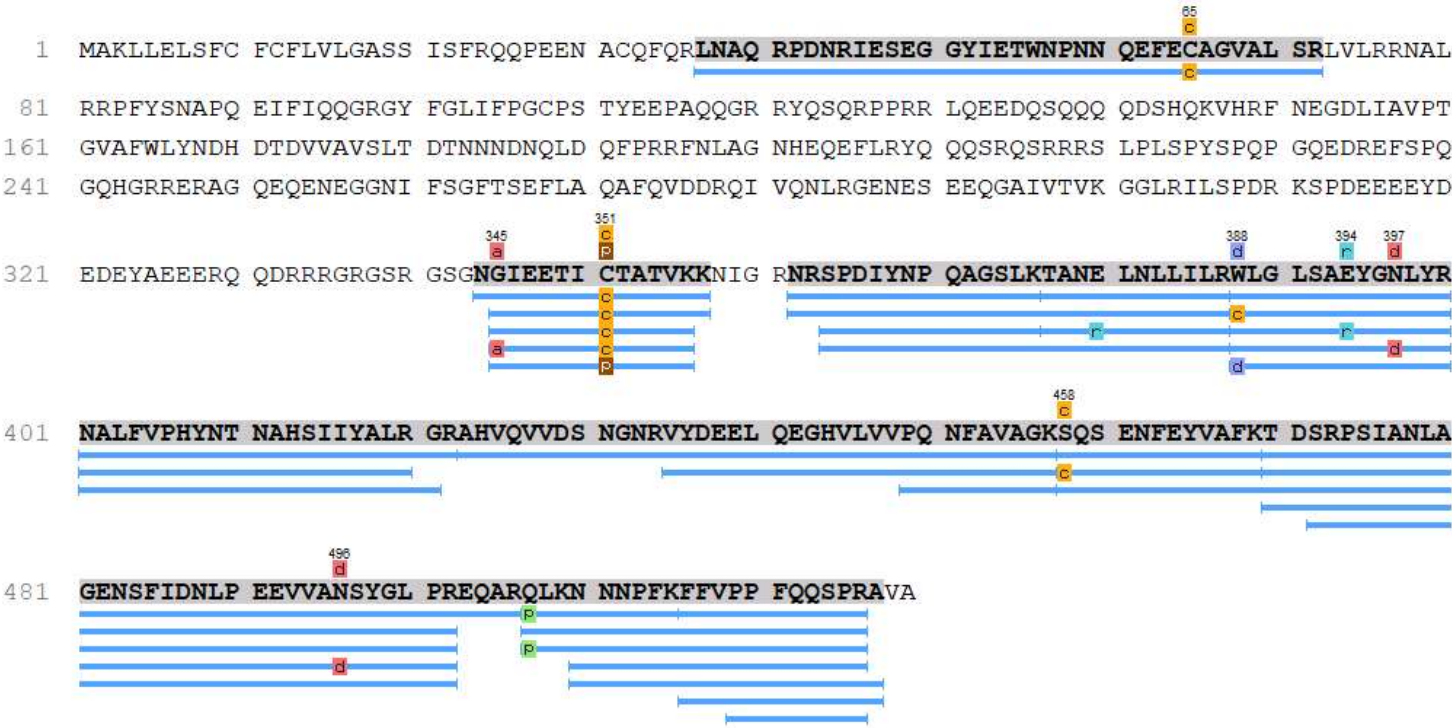

- Amidation of lysines or N-terminal amines with methyl acetimidate (+41.03)
- Carbamidomethylation (+57.02)
- Carbamidomethylation (DHKE, X@N-term) (+57.02)
- Deamidation (NQ) (+0.98)
- Dihydroxy (+31.99)
- Propionamide (+71.04)
- Pyro-glu from Q (-17.03)
- Replacement of 2 protons by iron (+53.92)

Supporting Peptides:

| Peptide                                | Uniq | -10lgP | Mass      | Length | ppm | m/z       | z | RT    | Fraction | Scan    | Source File      | Area Roast Ara h 2 | #Feature | #Feature Roast Ara h 2 | Start | End | PTM | AScore | Found By |
|----------------------------------------|------|--------|-----------|--------|-----|-----------|---|-------|----------|---------|------------------|--------------------|----------|------------------------|-------|-----|-----|--------|----------|
| R.NALFVPHYNTNAHSIIYALR,G               | N    | 151.62 | 2313.2019 | 20     | 3.7 | 1157.6125 | 2 | 33.79 | 4        | F4:1486 | OB5922 H2 Ro.raw | 4.79E7             | 11       | 11                     | 401   | 420 |     |        | PEAKS DB |
| R.WLGLSAEYGNLYR,N                      | N    | 145.22 | 1540.7673 | 13     | 3.5 | 771.3937  | 2 | 36.40 | 4        | F4:1654 | OB5922 H2 Ro.raw | 5.6282E7           | 22       | 22                     | 388   | 400 |     |        | PEAKS DB |
| K.TDSRPSIANLAGENSFIDNLP EEVVANSYGLPR,E | N    | 142.57 | 3544.7434 | 33     | 4.7 | 1182.5940 | 3 | 38.01 | 6        | F6:1881 | OB5946 H2 Ro.raw | 5.7129E7           | 11       | 11                     | 470   | 502 |     |        | PEAKS DB |
| R.SPDIYNPQAGSLKTANELNLLILR,W           | N    | 135.56 | 2639.4282 | 24     | 1.4 | 880.8179  | 3 | 36.01 | 4        | F4:1634 | OB5922 H2 Ro.raw | 6.2632E6           | 5        | 4                      | 364   | 387 |     |        | PEAKS DB |
| R.NRSPDIYNPQAGSLKTANELNLLILR,W         | N    | 134.91 | 2909.5723 | 26     | 2.3 | 970.8669  | 3 | 34.91 | 4        | F4:1560 | OB5922 H2 Ro.raw | 3.3615E6           | 6        | 6                      | 362   | 387 |     |        | PEAKS DB |
| K.SQSENFEYVAFK,T                       | N    | 130.69 | 1447.6619 | 12     | 2.8 | 724.8402  | 2 | 31.92 | 4        | F4:1368 | OB5922 H2 Ro.raw | 1.7167E7           | 4        | 4                      | 458   | 469 |     |        | PEAKS DB |
| K.FFVPPFQQSPR,A                        | Y    | 127.31 | 1348.6927 | 11     | 2.2 | 675.3551  | 2 | 33.42 | 4        | F4:1469 | OB5922 H2 Ro.raw | 3.074E6            | 3        | 3                      | 516   | 526 |     |        | PEAKS DB |
| K.FFVPPFQQSPR,V                        | Y    | 116.09 | 1419.7299 | 12     | 2.0 | 710.8737  | 2 | 33.08 | 6        | F6:1597 | OB5946 H2 Ro.raw | 1.5948E6           | 3        | 3                      | 516   | 527 |     |        | PEAKS DB |

total 58 peptides



| Peptide                                       | Uniq | -10lgP | Mass      | Length | ppm  | m/z       | z | RT    | Fraction | Scan    | Source File      | Area Roast Ara h 2 | #Feature | #Feature Roast Ara h 2 | Start | End | PTM                                   | AScore                                                                         | Found By  |
|-----------------------------------------------|------|--------|-----------|--------|------|-----------|---|-------|----------|---------|------------------|--------------------|----------|------------------------|-------|-----|---------------------------------------|--------------------------------------------------------------------------------|-----------|
| K.NNNPFKFFVPPFQQSPR.A                         | Y    | 113.79 | 2063.0376 | 17     | 1.8  | 688.6877  | 3 | 35.64 | 4        | F4:1615 | OB5922 H2 Ro.raw | 2.4453E5           | 5        | 5                      | 510   | 526 |                                       |                                                                                | PEAKS DB  |
| K.TDSRPSIANLAGENSFIDNLPEEVAN(+.98)SYGLPR.E    | N    | 112.33 | 3545.7273 | 33     | 1.8  | 1182.9185 | 3 | 36.63 | 5        | F5:1807 | OB5945 H2 Ro.raw | 0                  | 0        | 0                      | 470   | 502 | Deamidation (NQ)                      | N27:Deamidation (NQ):103.10                                                    | PEAKS DB  |
| N.GIEETIC(+57.02)TATVK.K                      | N    | 109.07 | 1320.6595 | 12     | -0.2 | 661.3369  | 2 | 29.91 | 4        | F4:1260 | OB5922 H2 Ro.raw | 2.1822E5           | 3        | 3                      | 345   | 356 | Carbamidomethylation                  | C7:Carbamidomethylation:1000.00                                                | PEAKS DB  |
| R.VYDEELQEGHVLVPPQNFAVAGK.S                   | N    | 102.31 | 2540.2910 | 23     | 1.4  | 847.7721  | 3 | 33.42 | 4        | F4:1478 | OB5922 H2 Ro.raw | 1.4453E6           | 6        | 6                      | 435   | 457 |                                       |                                                                                | PEAKS DB  |
| R.SPDIYNPQAGSLK.T                             | N    | 95.77  | 1388.6936 | 13     | 1.7  | 695.3552  | 2 | 28.58 | 5        | F5:1323 | OB5945 H2 Ro.raw | 5.949E5            | 3        | 3                      | 364   | 376 |                                       |                                                                                | PEAKS DB  |
| R.NALFVPH(+14.02)YNTNAHSIIYALR.G              | N    | 93.74  | 2327.2175 | 20     | 0.7  | 776.7470  | 3 | 34.91 | 4        | F4:1561 | OB5922 H2 Ro.raw | 1.3103E6           | 3        | 3                      | 401   | 420 |                                       | H7:Methylation(others):22.45                                                   | PEAKS PTM |
| R.NRSPDIYNPQAGSLK.T                           | N    | 91.67  | 1658.8376 | 15     | 0.8  | 830.4268  | 2 | 28.33 | 6        | F6:1298 | OB5946 H2 Ro.raw | 4.0221E5           | 6        | 6                      | 362   | 376 |                                       |                                                                                | PEAKS DB  |
| R.AHVQVVDSNGNRVYDEELQEGHVLVPPQNFAVAGK.S       | N    | 90.86  | 3816.9182 | 35     | 3.6  | 955.2402  | 4 | 32.32 | 6        | F6:1544 | OB5946 H2 Ro.raw | 8.2893E6           | 8        | 8                      | 423   | 457 |                                       |                                                                                | PEAKS DB  |
| K.TANELNLLILR.W                               | N    | 90.00  | 1268.7452 | 11     | 0.6  | 635.3802  | 2 | 35.27 | 4        | F4:1655 | OB5922 H2 Ro.raw | 2.0517E7           | 4        | 4                      | 377   | 387 |                                       |                                                                                | PEAKS DB  |
| V.PQNFAVAGK.S                                 | N    | 85.45  | 930.4923  | 9      | 1.0  | 466.2539  | 2 | 32.32 | 6        | F6:1542 | OB5946 H2 Ro.raw | 3.3444E6           | 3        | 3                      | 449   | 457 |                                       |                                                                                | PEAKS DB  |
| R.QLKNNNPFKFFVPPFQQSPR.A                      | Y    | 82.81  | 2432.2751 | 20     | 0.9  | 609.0766  | 4 | 34.45 | 5        | F5:1679 | OB5945 H2 Ro.raw | 6.0459E5           | 3        | 3                      | 507   | 526 |                                       |                                                                                | PEAKS DB  |
| R.W(+31.99)LGLSAEYGNLYR.N                     | N    | 77.74  | 1572.7572 | 13     | -1.6 | 787.3846  | 2 | 33.64 | 6        | F6:1624 | OB5946 H2 Ro.raw | 8.5976E4           | 2        | 2                      | 388   | 400 | Dihydroxy                             | W1:Dihydroxy:62.93                                                             | PEAKS PTM |
| K.S(+57.02)QSENFYVAFK.T                       | N    | 77.12  | 1504.6833 | 12     | 0.0  | 753.3489  | 2 | 31.77 | 6        | F6:1521 | OB5946 H2 Ro.raw | 4.3047E5           | 3        | 3                      | 458   | 469 | Carbamidomethylation (DHKE, X@N-term) | S1:Carbamidomethylation (DHKE, X@N-term):56.34                                 | PEAKS PTM |
| K.FFVPPFQQSP(+15.99)R.A                       | Y    | 76.27  | 1364.6876 | 11     | 0.9  | 683.3517  | 2 | 33.23 | 4        | F4:1459 | OB5922 H2 Ro.raw | 1.4813E6           | 3        | 3                      | 516   | 526 |                                       | P10:Oxidation or Hydroxylation:12.28                                           | PEAKS PTM |
| R.AHVQVVDSN(+.98)GNRVYDEELQEGHVLVPPQNFAVAGK.S | N    | 75.25  | 3817.9023 | 35     | 5.0  | 955.4877  | 4 | 33.04 | 4        | F4:1438 | OB5922 H2 Ro.raw | 1.3721E6           | 1        | 1                      | 423   | 457 |                                       | N9:Deamidation (NQ):4.64                                                       | PEAKS DB  |
| N.G(+57.02)IEETIC(+57.02)TATVK.K              | N    | 70.02  | 1377.6809 | 12     | 2.0  | 689.8491  | 2 | 30.19 | 4        | F4:1285 | OB5922 H2 Ro.raw | 5.5841E3           | 1        | 1                      | 345   | 356 | Carbamidomethylation                  | G1:Carbamidomethylation (DHKE, X@N-term):30.83;C7:Carbamidomethylation:1000.00 | PEAKS PTM |
| K.TANE(+53.92)LNLLILR.W                       | N    | 69.70  | 1322.6646 | 11     | -1.4 | 662.3386  | 2 | 35.27 | 4        | F4:1590 | OB5922 H2 Ro.raw | 2.333E5            | 1        | 1                      | 377   | 387 | Replacement of 2 protons by iron      | E4:Replacement of 2 protons by iron:154.98                                     | PEAKS PTM |

total 58 peptides



| Peptide                                          | Uniq | -10lgP | Mass      | Length | ppm  | m/z       | z | RT    | Fraction | Scan    | Source File      | Area Roast Ara h 2 | #Feature | #Feature Roast Ara h 2 | Start | End | PTM                                   | AScore                                          | Found By  |
|--------------------------------------------------|------|--------|-----------|--------|------|-----------|---|-------|----------|---------|------------------|--------------------|----------|------------------------|-------|-----|---------------------------------------|-------------------------------------------------|-----------|
| R.AHVQVVDNNGN(+.98)RVYDEELQEGHVLVPQNFAVAGK.S     | N    | 68.98  | 3817.9023 | 35     | 3.2  | 955.4859  | 4 | 32.51 | 5        | F5:1567 | OB5945 H2 Ro.raw | 0                  | 0        | 0                      | 423   | 457 |                                       | N11:Deamidation (NQ):8.22                       | PEAKS DB  |
| K.NNNPFKFFVPPFQQSPRA.V                           | Y    | 68.01  | 2134.0747 | 18     | 0.0  | 712.3655  | 3 | 35.15 | 6        | F6:1723 | OB5946 H2 Ro.raw | 8.836E4            | 2        | 2                      | 510   | 527 |                                       |                                                 | PEAKS DB  |
| R.Q(-17.03)LKNNNPFK.F                            | N    | 67.76  | 1084.5665 | 9      | 1.6  | 543.2914  | 2 | 28.75 | 5        | F5:1346 | OB5945 H2 Ro.raw | 1.0606E4           | 2        | 2                      | 507   | 515 | Pyro-glu from Q                       | Q1:Pyro-glu from Q:100 0.00                     | PEAKS PTM |
| N.GIEETIC(+57.02)TATVKK.N                        | N    | 66.30  | 1448.7545 | 13     | 0.5  | 725.3849  | 2 | 27.89 | 6        | F6:1301 | OB5946 H2 Ro.raw | 3.1708E5           | 3        | 3                      | 345   | 357 | Carbamidomethylation                  | C7:Carbamidomethylation:1000.00                 | PEAKS DB  |
| R.W(+57.02)LGLSAEYGNLYR.N                        | N    | 65.45  | 1597.7888 | 13     | 0.6  | 799.9022  | 2 | 35.09 | 5        | F5:1725 | OB5945 H2 Ro.raw | 1.848E4            | 1        | 1                      | 388   | 400 | Carbamidomethylation (DHKE, X@N-term) | W1:Carbamidomethylation (DHKE, X@N-term): 62.19 | PEAKS PTM |
| N.GIEETIC(+71.04)TATVK.K                         | N    | 65.44  | 1334.6752 | 12     | 3.2  | 668.3470  | 2 | 29.62 | 5        | F5:1395 | OB5945 H2 Ro.raw | 7.3781E3           | 1        | 1                      | 345   | 356 | Propionamide                          | C7:Propionamide:1000.00                         | PEAKS PTM |
| R.WLGLSAE(+53.92)YGNLYR.N                        | N    | 65.30  | 1594.6866 | 13     | 1.3  | 532.5702  | 3 | 34.72 | 5        | F5:1698 | OB5945 H2 Ro.raw | 6.0447E5           | 3        | 3                      | 388   | 400 | Replacement of 2 protons by iron      | E7:Replacement of 2 protons by iron:123.05      | PEAKS PTM |
| R.S(+57.02)PDIYNPQAGSLK.T                        | N    | 64.83  | 1445.7150 | 13     | 5.7  | 723.8689  | 2 | 28.94 | 5        | F5:1350 | OB5945 H2 Ro.raw | 6.4489E3           | 2        | 2                      | 364   | 376 |                                       | S1:Carbamidomethylation (DHKE, X@N-term): 14.04 | PEAKS PTM |
| R.NALFVPHYNTNAHSIIYALRG.R                        | N    | 61.88  | 2370.2231 | 21     | 1.2  | 791.0826  | 3 | 33.77 | 5        | F5:1624 | OB5945 H2 Ro.raw | 4.2894E6           | 2        | 2                      | 401   | 421 |                                       |                                                 | PEAKS DB  |
| K.SQSE(+21.98)NFEYVAFK.T                         | N    | 60.96  | 1469.6438 | 12     | -0.6 | 735.8287  | 2 | 31.51 | 5        | F5:1513 | OB5945 H2 Ro.raw | 2.7649E4           | 1        | 1                      | 458   | 469 |                                       | E4:Sodium adduct:0.00                           | PEAKS PTM |
| K.SQSENF(+21.98)YVAFK.T                          | N    | 59.61  | 1469.6438 | 12     | -1.1 | 735.8284  | 2 | 31.92 | 4        | F4:1388 | OB5922 H2 Ro.raw | 4.36E4             | 1        | 1                      | 458   | 469 |                                       | E7:Sodium adduct:14.84                          | PEAKS PTM |
| R.N(+57.02)ALFVPHYNTNAHSIIYALR.G                 | N    | 59.27  | 2370.2231 | 20     | -0.1 | 791.0816  | 3 | 34.53 | 4        | F4:1557 | OB5922 H2 Ro.raw | 3.2966E6           | 1        | 1                      | 401   | 420 |                                       | N1:Carbamidomethylation (DHKE, X@N-term): 10.82 | PEAKS PTM |
| K.SQSE(+53.92)NFEYVAFK.T                         | N    | 58.53  | 1501.5812 | 12     | -2.3 | 751.7961  | 2 | 31.58 | 6        | F6:1507 | OB5946 H2 Ro.raw | 9.4575E4           | 1        | 1                      | 458   | 469 |                                       | E4:Replacement of 2 protons by iron:34.87       | PEAKS PTM |
| K.TDSRPSIANLAGENSFIDNLPEEVVANSYGLPREQAR.Q        | N    | 58.03  | 4028.9827 | 37     | 2.2  | 1008.2552 | 4 | 36.41 | 5        | F5:1777 | OB5945 H2 Ro.raw | 1.9797E6           | 2        | 2                      | 470   | 506 |                                       |                                                 | PEAKS DB  |
| K.TDSRPSIANLAGENSFIDN(+.98)LPPEEVVANSYGLPR.E     | N    | 57.24  | 3545.7273 | 33     | 5.5  | 1182.9229 | 3 | 37.60 | 4        | F4:1724 | OB5922 H2 Ro.raw | 0                  | 0        | 0                      | 470   | 502 |                                       | N19:Deamidation (NQ):20.10                      | PEAKS DB  |
| R.SPD(+57.02)IYNPQAGSLK.T                        | N    | 55.35  | 1445.7150 | 13     | 2.2  | 723.8663  | 2 | 29.51 | 4        | F4:1244 | OB5922 H2 Ro.raw | 0                  | 0        | 0                      | 364   | 376 |                                       | D3:Carbamidomethylation (DHKE, X@N-term): 0.00  | PEAKS PTM |
| K.SQSENFYVAFKTDSRPSIANLAGENSFIDNLPEEVVANSYGLPR.E | N    | 54.99  | 4974.3945 | 45     | 2.5  | 1244.6090 | 4 | 38.26 | 4        | F4:1777 | OB5922 H2 Ro.raw | 3.3359E6           | 3        | 3                      | 458   | 502 |                                       |                                                 | PEAKS DB  |

total 58 peptides

| Peptide                                                | Uniq | -10lgP | Mass      | Length | ppm  | m/z       | z | RT    | Fraction | Scan    | Source File      | Area Roast Ara h 2 | #Feature | #Feature Roast Ara h 2 | Start | End | PTM                                                                                       | AScore                                                                                                       | Found By  |
|--------------------------------------------------------|------|--------|-----------|--------|------|-----------|---|-------|----------|---------|------------------|--------------------|----------|------------------------|-------|-----|-------------------------------------------------------------------------------------------|--------------------------------------------------------------------------------------------------------------|-----------|
| R.AHVQVVDNNGNRVYDEELQ(+.98)EGHVLVVPQNFAVAGK.S          | N    | 53.98  | 3817.9023 | 35     | 7.9  | 955.4904  | 4 | 33.43 | 6        | F6:1615 | OB5946 H2 Ro.raw | 0                  | 0        | 0                      | 423   | 457 |                                                                                           | Q19:Deamidation (NQ):4.91                                                                                    | PEAKS DB  |
| K.SQS(-18.01)ENFEYVAFK.T                               | N    | 52.68  | 1429.6514 | 12     | 1.9  | 715.8344  | 2 | 31.92 | 4        | F4:1380 | OB5922 H2 Ro.raw | 3.0777E4           | 1        | 1                      | 458   | 469 |                                                                                           | S3:Dehydration:14.04                                                                                         | PEAKS PTM |
| V.PPFQQSPR.A                                           | Y    | 50.68  | 955.4875  | 8      | -0.2 | 478.7510  | 2 | 35.15 | 6        | F6:1720 | OB5946 H2 Ro.raw | 1.8433E5           | 2        | 2                      | 519   | 526 |                                                                                           |                                                                                                              | PEAKS DB  |
| R.LNAQRPDNRISEGGYIETWNPNNQEFEC(+57.02)AGVALSR.L        | N    | 50.20  | 4133.9248 | 36     | 7.4  | 1034.4961 | 4 | 33.23 | 4        | F4:1476 | OB5922 H2 Ro.raw | 5.4856E4           | 1        | 1                      | 37    | 72  | Carbamidomethylation                                                                      | C29:Carbamidomethylation:1000.00                                                                             | PEAKS DB  |
| K.FFVPPFQQSPR(+15.99)A.V                               | Y    | 49.54  | 1435.7247 | 12     | 2.2  | 718.8712  | 2 | 33.04 | 4        | F4:1458 | OB5922 H2 Ro.raw | 9.538E5            | 2        | 2                      | 516   | 527 |                                                                                           | R11:Oxidation or Hydroxylation:12.28                                                                         | PEAKS PTM |
| R.NALFVPH(+57.02)YNTNAHSIIYALR.G                       | N    | 49.15  | 2370.2231 | 20     | 0.1  | 791.0817  | 3 | 34.03 | 6        | F6:1601 | OB5946 H2 Ro.raw | 8.9747E5           | 1        | 1                      | 401   | 420 |                                                                                           | H7:Carbamidomethylation (DHKE, X@N-term):20.35                                                               | PEAKS PTM |
| D.SRPSIANLAGENSFIDNLPEEVVANSYGLPR.E                    | N    | 48.34  | 3328.6687 | 31     | 3.9  | 1110.5679 | 3 | 37.36 | 5        | F5:1841 | OB5945 H2 Ro.raw | 3.0619E5           | 2        | 2                      | 472   | 502 |                                                                                           |                                                                                                              | PEAKS DB  |
| K.TDSRPSIANLAGEN(+.98)SFIDNLPEEVVANSYGLPR.E            | N    | 47.42  | 3545.7273 | 33     | 9.2  | 1182.9272 | 3 | 48.53 | 5        | F5:2493 | OB5945 H2 Ro.raw | 0                  | 0        | 0                      | 470   | 502 |                                                                                           | N14:Deamidation (NQ):19.39                                                                                   | PEAKS DB  |
| R.WLGLSAEYGN(+.98)LYR.N                                | N    | 47.40  | 1541.7513 | 13     | 5.4  | 771.8871  | 2 | 54.24 | 4        | F4:2679 | OB5922 H2 Ro.raw | 0                  | 0        | 0                      | 388   | 400 | Deamidation (NQ)                                                                          | N10:Deamidation (NQ):1000.00                                                                                 | PEAKS DB  |
| N.G(+41.03)IEETIC(+57.02)TATVK.K                       | N    | 47.00  | 1361.6860 | 12     | 0.7  | 681.8508  | 2 | 29.66 | 5        | F5:1390 | OB5945 H2 Ro.raw | 4.1987E4           | 2        | 2                      | 345   | 356 | Amidination of lysines or N-terminal amines with methyl acetimidate; Carbamidomethylation | G1:Amidination of lysines or N-terminal amines with methyl acetimidate:96.48;C7:Carbamidomethylation:1000.00 | PEAKS PTM |
| R.NALFVPHYNTNAHSIIYALRGR.A                             | N    | 46.11  | 2526.3245 | 22     | 0.6  | 843.1160  | 3 | 33.60 | 4        | F4:1492 | OB5922 H2 Ro.raw | 7.6168E5           | 2        | 2                      | 401   | 422 |                                                                                           |                                                                                                              | PEAKS DB  |
| R.Q(-17.03)LKNNNPFFKFFVPPFQQSPR.A                      | Y    | 45.85  | 2415.2488 | 20     | 1.8  | 806.0917  | 3 | 36.41 | 5        | F5:1798 | OB5945 H2 Ro.raw | 1.5157E5           | 1        | 1                      | 507   | 526 | Pyro-glu from Q                                                                           | Q1:Pyro-glu from Q:1000.00                                                                                   | PEAKS PTM |
| K.SQSEN(+.98)FEYVAFKTDSPSIANLAGENSFIDNLPEEVVANSYGLPR.E | N    | 45.32  | 4975.3789 | 45     | 2.8  | 1244.8555 | 4 | 39.75 | 5        | F5:1987 | OB5945 H2 Ro.raw | 0                  | 0        | 0                      | 458   | 502 |                                                                                           | N5:Deamidation (NQ):0.00                                                                                     | PEAKS DB  |
| G.NGIEETIC(+57.02)TATVKK.N                             | N    | 42.60  | 1562.7974 | 14     | 0.1  | 782.4060  | 2 | 29.85 | 5        | F5:1417 | OB5945 H2 Ro.raw | 8.2899E3           | 2        | 2                      | 344   | 357 | Carbamidomethylation                                                                      | C8:Carbamidomethylation:1000.00                                                                              | PEAKS DB  |
| R.N(+.98)ALFVPHYNTNAHSIIYALR.G                         | N    | 38.37  | 2314.1858 | 20     | 7.3  | 772.4082  | 3 | 50.66 | 4        | F4:2450 | OB5922 H2 Ro.raw | 1.0573E4           | 1        | 1                      | 401   | 420 |                                                                                           | N1:Deamidation (NQ):32.94                                                                                    | PEAKS DB  |
| R.WLGLSAE(+21.98)YGNLYR.N                              | N    | 36.57  | 1562.7494 | 13     | -8.4 | 782.3754  | 2 | 35.27 | 4        | F4:1583 | OB5922 H2 Ro.raw | 5.0047E4           | 2        | 2                      | 388   | 400 |                                                                                           | E7:Sodium adduct:42.78                                                                                       | PEAKS PTM |
| total 58 peptides                                      |      |        |           |        |      |           |   |       |          |         |                  |                    |          |                        |       |     |                                                                                           |                                                                                                              |           |

[Protein Coverage](#) | [Supporting Peptides](#) |

Protein Coverage:

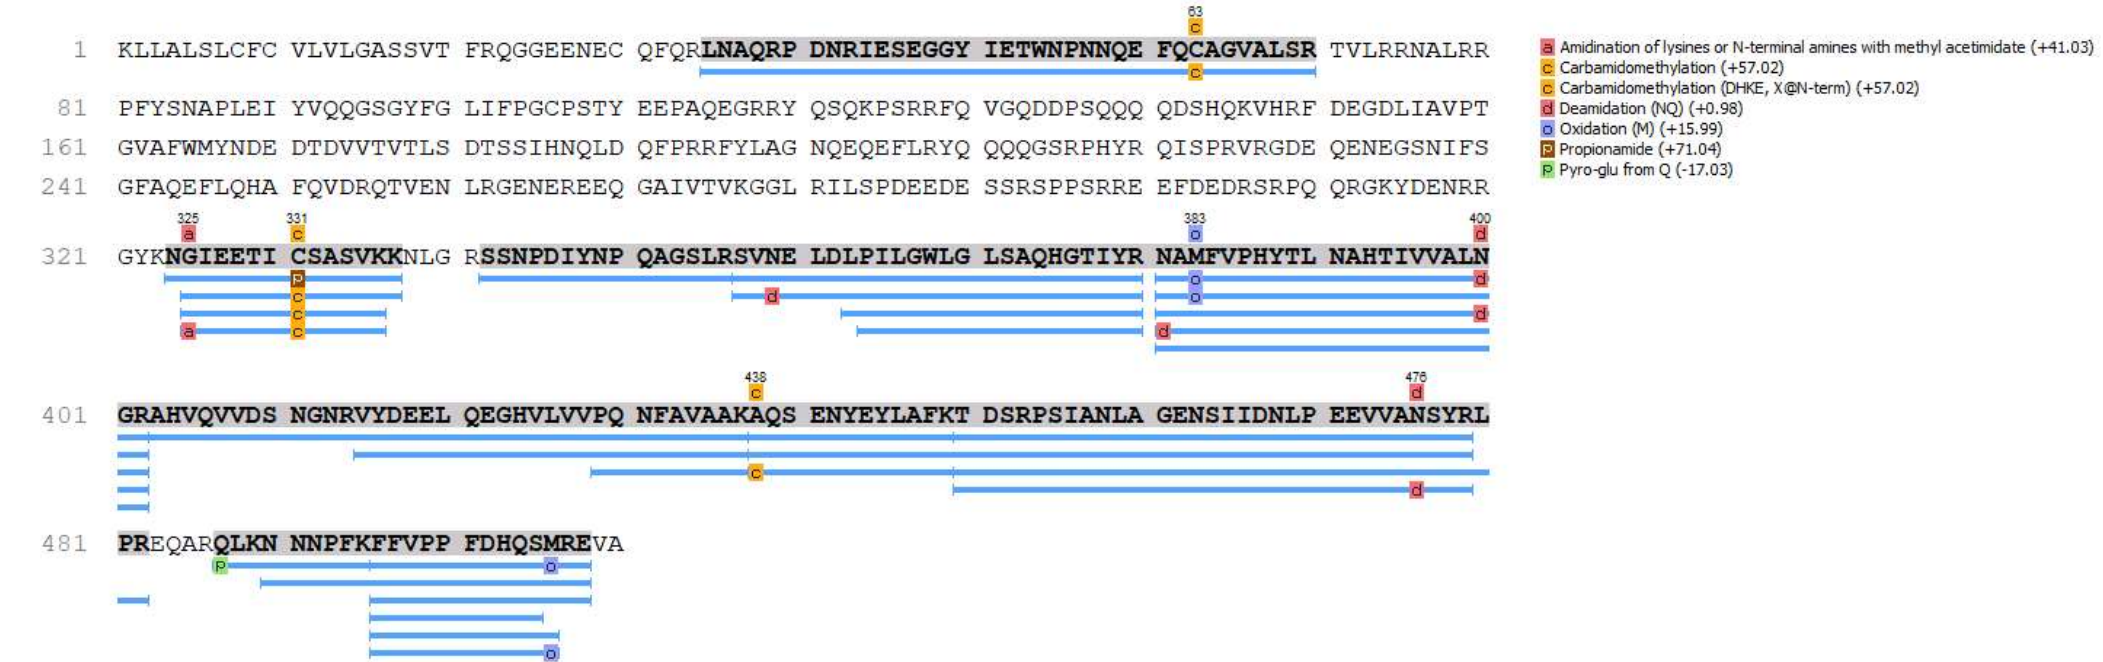

Supporting Peptides:

| Peptide                               | Uniq | -10lgP | Mass      | Length | ppm  | m/z       | z | RT    | Fraction | Scan    | Source File      | Area Roast Ara h 2 | #Feature | #Feature Roast Ara h 2 | Start | End | PTM              | AScore                                        | Found By  |
|---------------------------------------|------|--------|-----------|--------|------|-----------|---|-------|----------|---------|------------------|--------------------|----------|------------------------|-------|-----|------------------|-----------------------------------------------|-----------|
| R.NAMFVPHYTLNAHTIVVALN(+.98)GR.A      | Y    | 160.37 | 2438.2529 | 22     | 3.0  | 1220.1375 | 2 | 33.96 | 5        | F5:1643 | OB5945 H2 Ro.raw | 9.2221E6           | 5        | 5                      | 381   | 402 | Deamidation (NQ) | N20:Deamidation (NQ):180.29                   | PEAKS DB  |
| R.SVNELDLPILGWLGLSAQHGTIYR.N          | Y    | 158.35 | 2651.4070 | 24     | 3.8  | 1326.7158 | 2 | 39.91 | 6        | F6:1991 | OB5946 H2 Ro.raw | 6.2356E7           | 15       | 15                     | 357   | 380 |                  |                                               | PEAKS DB  |
| K.TDSRPSIANLAGENSII DNLP EEEVVANSYR.L | Y    | 150.05 | 3243.6006 | 30     | 5.0  | 1082.2129 | 3 | 36.29 | 6        | F6:1782 | OB5946 H2 Ro.raw | 1.2988E7           | 7        | 7                      | 450   | 479 |                  |                                               | PEAKS DB  |
| R.NAMFVPHYTLNAHTIVVALN GR.A           | Y    | 142.76 | 2437.2688 | 22     | 3.5  | 1219.6460 | 2 | 34.54 | 5        | F5:1687 | OB5945 H2 Ro.raw | 7.7824E6           | 7        | 7                      | 381   | 402 |                  |                                               | PEAKS DB  |
| K.AQSENYEYLAFK.T                      | Y    | 135.05 | 1461.6776 | 12     | 0.6  | 731.8465  | 2 | 31.92 | 4        | F4:1369 | OB5922 H2 Ro.raw | 6.5522E6           | 3        | 3                      | 438   | 449 |                  |                                               | PEAKS DB  |
| R.S(+57.02)VNELDLPILGWLGLSAQHGTIYR.N  | Y    | 132.85 | 2708.4285 | 24     | -0.8 | 1355.2205 | 2 | 40.55 | 4        | F4:1898 | OB5922 H2 Ro.raw | 4.7421E5           | 1        | 1                      | 357   | 380 |                  | S1:Carbamidomethylation (DHKE, X@N-term):0.00 | PEAKS PTM |
| R.SSNPDIYNPQAGSLR.S                   | Y    | 129.02 | 1617.7747 | 15     | 0.7  | 809.8952  | 2 | 29.12 | 4        | F4:1205 | OB5922 H2 Ro.raw | 1.2321E6           | 3        | 3                      | 342   | 356 |                  |                                               | PEAKS DB  |

total 46 peptides

| Peptide                                              | Uniq | -10lgP | Mass      | Length | ppm  | m/z       | z | RT    | Fraction | Scan    | Source File      | Area Roast Ara h 2 | #Feature | #Feature Roast Ara h 2 | Start | End | PTM                                   | AScore                                               | Found By  |
|------------------------------------------------------|------|--------|-----------|--------|------|-----------|---|-------|----------|---------|------------------|--------------------|----------|------------------------|-------|-----|---------------------------------------|------------------------------------------------------|-----------|
| R.NAM(+15.99)FVPHYTLNAHTIVVALNGR.A                   | Y    | 126.44 | 2453.2637 | 22     | 1.4  | 818.7629  | 3 | 34.16 | 4        | F4:1519 | OB5922 H2 Ro.raw | 2.32E6             | 3        | 3                      | 381   | 402 | Oxidation (M)                         | M3:Oxidation (M):1000.00                             | PEAKS DB  |
| L.PILGWLGLSAQHGTIYR.N                                | Y    | 124.94 | 1881.0261 | 17     | 0.7  | 941.5210  | 2 | 40.57 | 4        | F4:1889 | OB5922 H2 Ro.raw | 2.9616E5           | 2        | 2                      | 364   | 380 |                                       |                                                      | PEAKS DB  |
| R.AHVQVVDSNGN(+.98)RVYDEELQEGHVLVVPQNFVAFAAK.A       | Y    | 113.48 | 3831.9180 | 35     | 4.0  | 1278.3184 | 3 | 32.50 | 6        | F6:1562 | OB5946 H2 Ro.raw | 3.2728E6           | 4        | 4                      | 403   | 437 |                                       | N11:Deamidation (NQ):15.73                           | PEAKS DB  |
| R.NAM(+15.99)FVPHYTLNAHTIVVALN(+.98)GR.A             | Y    | 106.88 | 2454.2478 | 22     | 0.3  | 819.0901  | 3 | 32.82 | 5        | F5:1580 | OB5945 H2 Ro.raw | 1.0956E6           | 4        | 4                      | 381   | 402 | Oxidation (M); Deamidation (NQ)       | M3:Oxidation (M):1000.00;N20:Deamidation (NQ):104.25 | PEAKS DB  |
| R.AHVQVVDSN(+.98)GNRVYDEELQEGHVLVVPQNFVAFAAK.A       | Y    | 104.42 | 3831.9180 | 35     | 4.4  | 1278.3188 | 3 | 32.26 | 5        | F5:1553 | OB5945 H2 Ro.raw | 5.1124E6           | 4        | 4                      | 403   | 437 |                                       | N9:Deamidation (NQ):39.44                            | PEAKS DB  |
| R.SVNELDLPILGW(+31.99)LGLSAQHGTIYR.N                 | Y    | 103.31 | 2683.3970 | 24     | 2.4  | 1342.7090 | 2 | 39.79 | 4        | F4:1852 | OB5922 H2 Ro.raw | 7.442E4            | 1        | 1                      | 357   | 380 |                                       | W12:Dihydroxy:44.28                                  | PEAKS PTM |
| K.TDSRPSIANLAGENSIIDNLPEEVVANSYRLPR.E                | Y    | 99.31  | 3609.8386 | 33     | 3.4  | 903.4700  | 4 | 37.52 | 4        | F4:1753 | OB5922 H2 Ro.raw | 2.5873E7           | 4        | 4                      | 450   | 482 |                                       |                                                      | PEAKS DB  |
| N.GIEETIC(+57.02)SASVK.K                             | Y    | 94.29  | 1292.6282 | 12     | 0.9  | 647.3220  | 2 | 29.26 | 6        | F6:1364 | OB5946 H2 Ro.raw | 6.9435E4           | 3        | 3                      | 325   | 336 | Carbamidomethylation                  | C7:Carbamidomethylation:100.00                       | PEAKS DB  |
| K.FFVPPFDHQSRE.V                                     | Y    | 93.17  | 1635.7504 | 13     | 0.3  | 818.8827  | 2 | 32.86 | 4        | F4:1440 | OB5922 H2 Ro.raw | 2.6869E6           | 5        | 5                      | 496   | 508 |                                       |                                                      | PEAKS DB  |
| K.A(+57.02)QSENYEYLAFAK.T                            | Y    | 91.59  | 1518.6990 | 12     | -0.7 | 760.3562  | 2 | 31.51 | 5        | F5:1505 | OB5945 H2 Ro.raw | 1.9478E5           | 3        | 3                      | 438   | 449 | Carbamidomethylation (DHKE, X@N-term) | A1:Carbamidomethylation (DHKE, X@N-term):56.34       | PEAKS PTM |
| K.TDSRPSIANLAGENSIIDNLPEEVVAN(+.98)SYR.L             | Y    | 82.09  | 3244.5847 | 30     | 1.7  | 1082.5374 | 3 | 35.58 | 5        | F5:1746 | OB5945 H2 Ro.raw | 0                  | 0        | 0                      | 450   | 479 | Deamidation (NQ)                      | N27:Deamidation (NQ):78.75                           | PEAKS DB  |
| R.NAM(+15.99)FVPHYTLN(+.98)AHTIVVALNGR.A             | Y    | 76.23  | 2454.2478 | 22     | 1.2  | 819.0908  | 3 | 33.30 | 5        | F5:1613 | OB5945 H2 Ro.raw | 0                  | 0        | 0                      | 381   | 402 | Oxidation (M)                         | M3:Oxidation (M):1000.00;N11:Deamidation (NQ):0.00   | PEAKS DB  |
| R.VYDEELQEGHVLVVPQNFVAFAAK.A                         | Y    | 75.46  | 2554.3066 | 23     | 0.5  | 852.4432  | 3 | 33.26 | 6        | F6:1608 | OB5946 H2 Ro.raw | 2.0809E4           | 1        | 1                      | 415   | 437 |                                       |                                                      | PEAKS DB  |
| R.LNAQRPDNRIESEGGYIETWNPNNQEFQC(+57.02)AGVALSR.T     | Y    | 73.52  | 4132.9409 | 36     | 2.1  | 1034.2446 | 4 | 32.69 | 6        | F6:1579 | OB5946 H2 Ro.raw | 1.2843E5           | 1        | 1                      | 35    | 70  | Carbamidomethylation                  | C29:Carbamidomethylation:1000.00                     | PEAKS DB  |
| N.GIEETIC(+57.02)SASVK.N                             | Y    | 72.67  | 1420.7231 | 13     | 1.3  | 711.3698  | 2 | 28.13 | 4        | F4:1149 | OB5922 H2 Ro.raw | 1.93E5             | 3        | 3                      | 325   | 337 | Carbamidomethylation                  | C7:Carbamidomethylation:100.00                       | PEAKS DB  |
| K.FFVPPFDHQS(+15.99)RE.V                             | Y    | 67.96  | 1651.7452 | 13     | 1.7  | 826.8813  | 2 | 32.49 | 4        | F4:1425 | OB5922 H2 Ro.raw | 7.5314E5           | 4        | 4                      | 496   | 508 | Oxidation (M)                         | M11:Oxidation (M):1000.00                            | PEAKS DB  |
| R.Q(-17.03)LKNNNPFK.F                                | N    | 67.76  | 1084.5665 | 9      | 1.6  | 543.2914  | 2 | 28.75 | 5        | F5:1346 | OB5945 H2 Ro.raw | 1.0606E4           | 2        | 2                      | 487   | 495 | Pyro-glu from Q                       | Q1:Pyro-glu from Q:1000.00                           | PEAKS PTM |
| R.AHVQVVDSN(+.98)GN(+.98)RVYDEELQEGHVLVVPQNFVAFAAK.A | Y    | 66.65  | 3832.9019 | 35     | 7.9  | 767.5937  | 5 | 32.26 | 5        | F5:1556 | OB5945 H2 Ro.raw | 3.9346E5           | 1        | 1                      | 403   | 437 |                                       | N9:Deamidation (NQ):5.83;N11:Deamidation (NQ):8.28   | PEAKS DB  |

total 46 peptides

| Peptide                                        | Uniq | -10lgP | Mass      | Length | ppm  | m/z       | z | RT    | Fraction | Scan    | Source File      | Area Roast Ara h 2 | #Feature | #Feature Roast Ara h 2 | Start | End | PTM                                                                                       | AScore                                                                                                        | Found By  |
|------------------------------------------------|------|--------|-----------|--------|------|-----------|---|-------|----------|---------|------------------|--------------------|----------|------------------------|-------|-----|-------------------------------------------------------------------------------------------|---------------------------------------------------------------------------------------------------------------|-----------|
| R.N(+.98)AMFVPHYTLNAHTIVVALNGR.A               | Y    | 66.31  | 2438.2529 | 22     | 3.0  | 1220.1375 | 2 | 33.96 | 5        | F5:1680 | OB5945 H2 Ro.raw | 9.5447E5           | 1        | 1                      | 381   | 402 | Deamidation (NQ)                                                                          | N1:Deamidation (NQ):63.03                                                                                     | PEAKS DB  |
| V.PQNFAVAAK.A                                  | N    | 63.04  | 944.5079  | 9      | 0.9  | 473.2617  | 2 | 32.86 | 4        | F4:1447 | OB5922 H2 Ro.raw | 2.0461E6           | 3        | 3                      | 429   | 437 |                                                                                           |                                                                                                               | PEAKS DB  |
| R.NAMFVPHYTLNAH(+57.02)TIVVALNGR.A             | Y    | 62.29  | 2494.2903 | 22     | -3.1 | 832.4348  | 3 | 34.84 | 5        | F5:1702 | OB5945 H2 Ro.raw | 0                  | 0        | 0                      | 381   | 402 |                                                                                           | H13:Carbamido methylation (D HKE, X@N-term):5.30                                                              | PEAKS PTM |
| K.FFVPPFDHQSM.R                                | Y    | 62.13  | 1350.6067 | 11     | 0.3  | 676.3108  | 2 | 34.60 | 6        | F6:1680 | OB5946 H2 Ro.raw | 2.36E5             | 3        | 3                      | 496   | 506 |                                                                                           |                                                                                                               | PEAKS DB  |
| K.AQSENIEYLAFKTSRPSIANLAGENSIIDNLPEEVVANSYR.L  | Y    | 61.90  | 4687.2676 | 42     | 3.1  | 1172.8278 | 4 | 36.79 | 5        | F5:1810 | OB5945 H2 Ro.raw | 2.0852E6           | 1        | 1                      | 438   | 479 |                                                                                           |                                                                                                               | PEAKS DB  |
| D.LPILGWLGLSAQHGTIYR.N                         | Y    | 60.41  | 1994.1101 | 18     | 2.4  | 998.0647  | 2 | 40.55 | 4        | F4:1901 | OB5922 H2 Ro.raw | 1.1908E5           | 1        | 1                      | 363   | 380 |                                                                                           |                                                                                                               | PEAKS DB  |
| K.FFVPPFDHQS.M                                 | Y    | 57.76  | 1219.5662 | 10     | 1.5  | 610.7913  | 2 | 33.58 | 5        | F5:1616 | OB5945 H2 Ro.raw | 2.2184E5           | 2        | 2                      | 496   | 505 |                                                                                           |                                                                                                               | PEAKS DB  |
| R.SVN(+.98)ELDLPLGWLGLSAQHGTIYR.N              | Y    | 54.93  | 2652.3911 | 24     | 9.1  | 1327.2150 | 2 | 46.79 | 4        | F4:2254 | OB5922 H2 Ro.raw | 0                  | 0        | 0                      | 357   | 380 | Deamidation (NQ)                                                                          | N3:Deamidation (NQ):57.31                                                                                     | PEAKS DB  |
| K.NNNPFKFFVPPFDHQSMRE.V                        | Y    | 53.67  | 2350.0952 | 19     | 1.4  | 784.3734  | 3 | 34.54 | 5        | F5:1693 | OB5945 H2 Ro.raw | 4.2082E5           | 2        | 2                      | 490   | 508 |                                                                                           |                                                                                                               | PEAKS DB  |
| N.G(+57.02)IEETIC(+57.02)SASVKK.N              | Y    | 52.58  | 1477.7446 | 13     | -0.5 | 739.8792  | 2 | 28.58 | 4        | F4:1182 | OB5922 H2 Ro.raw | 1.8561E4           | 2        | 2                      | 325   | 337 | Carbamidomethylation                                                                      | G1:Carbamidom ethylation (DHK E, X@N-term):2.85;C7:Carbamidomethylation:1000.00                               | PEAKS PTM |
| R.AHVQ(+.98)VVDSSNGNRVYDEELQEGHVLVVPQNFAVAAK.A | Y    | 49.71  | 3831.9180 | 35     | 2.7  | 767.3929  | 5 | 32.86 | 4        | F4:1451 | OB5922 H2 Ro.raw | 3.9416E5           | 1        | 1                      | 403   | 437 |                                                                                           | Q4:Deamidation (NQ):0.00                                                                                      | PEAKS DB  |
| N.G(+41.03)IEETIC(+57.02)SASVK.K               | Y    | 48.35  | 1333.6548 | 12     | 0.4  | 667.8350  | 2 | 29.26 | 6        | F6:1372 | OB5946 H2 Ro.raw | 8.2083E3           | 1        | 1                      | 325   | 336 | Amidination of lysines or N-terminal amines with methyl acetimidate; Carbamidomethylation | G1:Amidination of lysines or N-terminal amines with methyl acetimidate:71.87; C7:Carbamidom ethylation:100.00 | PEAKS PTM |
| R.NAMFVPHYTLNAH(+57.02)TIVVALN(+.98)GR.A       | Y    | 47.39  | 2495.2744 | 22     | 0.0  | 832.7654  | 3 | 33.96 | 5        | F5:1660 | OB5945 H2 Ro.raw | 1.2865E5           | 1        | 1                      | 381   | 402 |                                                                                           | H13:Carbamido methylation (D HKE, X@N-term):0.00;N20:Deamidation (NQ):43.52                                   | PEAKS PTM |
| K.FFVPPFDHQS(+15.99).R                         | Y    | 45.84  | 1366.6016 | 11     | 1.6  | 684.3091  | 2 | 33.79 | 4        | F4:1494 | OB5922 H2 Ro.raw | 5.6927E4           | 1        | 1                      | 496   | 506 | Oxidation (M)                                                                             | M11:Oxidation (M):1000.00                                                                                     | PEAKS DB  |
| K.TDSRPSIANLAGENSIIDNLPEEVVAN(+.98)SYRLPR.E    | Y    | 45.48  | 3610.8225 | 33     | 5.4  | 1204.6213 | 3 | 35.38 | 5        | F5:1734 | OB5945 H2 Ro.raw | 0                  | 0        | 0                      | 450   | 482 |                                                                                           | N27:Deamidation (NQ):32.94                                                                                    | PEAKS DB  |
| R.S(+57.02)SNPDIYNPQAGSLR.S                    | Y    | 39.95  | 1674.7961 | 15     | 7.9  | 838.4119  | 2 | 29.48 | 4        | F4:1242 | OB5922 H2 Ro.raw | 0                  | 0        | 0                      | 342   | 356 |                                                                                           | S1:Carbamidom ethylation (DHK E, X@N-term):11.12                                                              | PEAKS PTM |

total 46 peptides

| Peptide                                        | Uniq | -10lgP | Mass      | Length | ppm  | m/z       | z | RT    | Fraction | Scan    | Source File      | Area Roast Ara h 2 | #Feature | #Feature Roast Ara h 2 | Start | End | PTM          | AScore                                               | Found By  |
|------------------------------------------------|------|--------|-----------|--------|------|-----------|---|-------|----------|---------|------------------|--------------------|----------|------------------------|-------|-----|--------------|------------------------------------------------------|-----------|
| R.SSNPD(+21.98)IYNPQAGSLR,S                    | Y    | 39.67  | 1639.7566 | 15     | 4.2  | 820.8890  | 2 | 29.21 | 4        | F4:1226 | OB5922 H2 Ro.raw | 0                  | 0        | 0                      | 342   | 356 |              | D5:Sodium adduct:43.70                               | PEAKS PTM |
| K.AQSENYE(+21.98)YLAFK,T                       | Y    | 37.74  | 1483.6595 | 12     | -1.5 | 742.8359  | 2 | 31.58 | 6        | F6:1513 | OB5946 H2 Ro.raw | 8.2984E3           | 1        | 1                      | 438   | 449 |              | E7:Sodium adduct:0.00                                | PEAKS PTM |
| K.NGIEETIC(+71.04)SASVKK,N                     | Y    | 36.28  | 1548.7817 | 14     | 3.3  | 775.4007  | 2 | 29.48 | 5        | F5:1385 | OB5945 H2 Ro.raw | 2.1762E3           | 1        | 1                      | 324   | 337 | Propionamide | C8:Propionamide:1000.00                              | PEAKS PTM |
| R.SVNELDLPILGWLGLSAQHGTIY(+31.99)R,N           | Y    | 36.02  | 2683.3970 | 24     | 3.4  | 895.4760  | 3 | 39.79 | 4        | F4:1960 | OB5922 H2 Ro.raw | 9.7778E5           | 1        | 1                      | 357   | 380 |              | Y23:Dihydroxy:0.00                                   | PEAKS PTM |
| K.TDSRPSIAN(+.98)LAGEN(+.98)SIIDNLPEEVVANSYR,L | Y    | 35.41  | 3245.5686 | 30     | 4.2  | 1082.8680 | 3 | 47.69 | 4        | F4:2306 | OB5922 H2 Ro.raw | 0                  | 0        | 0                      | 450   | 479 |              | N9:Deamidation (NQ):12.20;N14:Deamidation (NQ):10.19 | PEAKS DB  |
| total 46 peptides                              |      |        |           |        |      |           |   |       |          |         |                  |                    |          |                        |       |     |              |                                                      |           |

Q0GM57|Q0GM57\_ARAHY

back to list

| [Protein Coverage](#) | [Supporting Peptides](#) |

Protein Coverage:

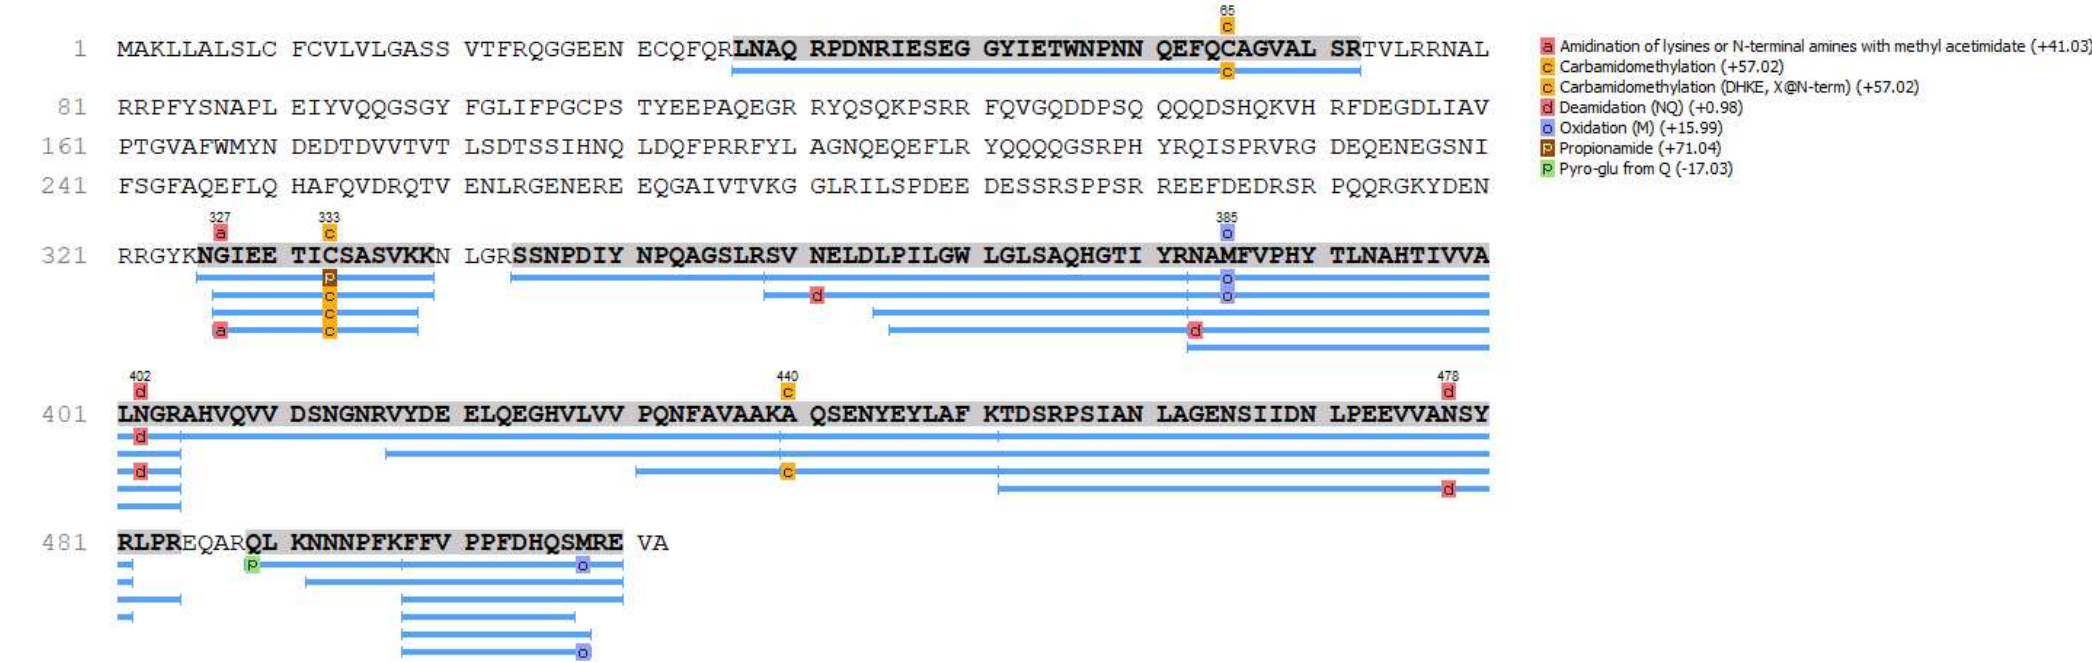

Supporting Peptides:

| Peptide           | Uniq | -10lgP | Mass | Length | ppm | m/z | z | RT | Fraction | Scan | Source File | Area Roast Ara h 2 | #Feature | #Feature Roast Ara h 2 | Start | End | PTM | AScore | Found By |
|-------------------|------|--------|------|--------|-----|-----|---|----|----------|------|-------------|--------------------|----------|------------------------|-------|-----|-----|--------|----------|
| total 46 peptides |      |        |      |        |     |     |   |    |          |      |             |                    |          |                        |       |     |     |        |          |



| Peptide                                     | Uniq | -10lgP | Mass      | Length | ppm  | m/z       | z | RT    | Fraction | Scan    | Source File      | Area Roast Ara h 2 | #Feature | #Feature Roast Ara h 2 | Start | End | PTM                                   | AScore                                               | Found By  |
|---------------------------------------------|------|--------|-----------|--------|------|-----------|---|-------|----------|---------|------------------|--------------------|----------|------------------------|-------|-----|---------------------------------------|------------------------------------------------------|-----------|
| R.NAMFVPHYTLNAHTIVVALN(+.98)GR.A            | Y    | 160.37 | 2438.2529 | 22     | 3.0  | 1220.1375 | 2 | 33.96 | 5        | F5:1643 | OB5945 H2 Ro.raw | 9.2221E6           | 5        | 5                      | 383   | 404 | Deamidation (NQ)                      | N20:Deamidation (NQ):180.29                          | PEAKS DB  |
| R.SVNELDLPLGLWGLSAQHGTIYR.N                 | Y    | 158.35 | 2651.4070 | 24     | 3.8  | 1326.7158 | 2 | 39.91 | 6        | F6:1991 | OB5946 H2 Ro.raw | 6.2356E7           | 15       | 15                     | 359   | 382 |                                       |                                                      | PEAKS DB  |
| K.TDSRPSIANLAGENSIIDNLPEEVVANSYR.L          | Y    | 150.05 | 3243.6006 | 30     | 5.0  | 1082.2129 | 3 | 36.29 | 6        | F6:1782 | OB5946 H2 Ro.raw | 1.2988E7           | 7        | 7                      | 452   | 481 |                                       |                                                      | PEAKS DB  |
| R.NAMFVPHYTLNAHTIVVALNGR.A                  | Y    | 142.76 | 2437.2688 | 22     | 3.5  | 1219.6460 | 2 | 34.54 | 5        | F5:1687 | OB5945 H2 Ro.raw | 7.7824E6           | 7        | 7                      | 383   | 404 |                                       |                                                      | PEAKS DB  |
| K.AQSENIEYLAFK.T                            | Y    | 135.05 | 1461.6776 | 12     | 0.6  | 731.8465  | 2 | 31.92 | 4        | F4:1369 | OB5922 H2 Ro.raw | 6.5522E6           | 3        | 3                      | 440   | 451 |                                       |                                                      | PEAKS DB  |
| R.S(+57.02)VNELDLPLGLWGLSAQHGTIYR.N         | Y    | 132.85 | 2708.4285 | 24     | -0.8 | 1355.2205 | 2 | 40.55 | 4        | F4:1898 | OB5922 H2 Ro.raw | 4.7421E5           | 1        | 1                      | 359   | 382 |                                       | S1:Carbamidomethylation (DHKE, X@N-term):0.00        | PEAKS PTM |
| R.SSNPDIYNPQAGSLR.S                         | Y    | 129.02 | 1617.7747 | 15     | 0.7  | 809.8952  | 2 | 29.12 | 4        | F4:1205 | OB5922 H2 Ro.raw | 1.2321E6           | 3        | 3                      | 344   | 358 |                                       |                                                      | PEAKS DB  |
| R.NAM(+15.99)FVPHYTLNAHTIVVALNGR.A          | Y    | 126.44 | 2453.2637 | 22     | 1.4  | 818.7629  | 3 | 34.16 | 4        | F4:1519 | OB5922 H2 Ro.raw | 2.32E6             | 3        | 3                      | 383   | 404 | Oxidation (M)                         | M3:Oxidation (M):1000.00                             | PEAKS DB  |
| L.PILGLWGLSAQHGTIYR.N                       | Y    | 124.94 | 1881.0261 | 17     | 0.7  | 941.5210  | 2 | 40.57 | 4        | F4:1889 | OB5922 H2 Ro.raw | 2.9616E5           | 2        | 2                      | 366   | 382 |                                       |                                                      | PEAKS DB  |
| R.AHVQVVDNNG(+.98)RVYDEELQEGHVLVVPQNFVAAK.A | Y    | 113.48 | 3831.9180 | 35     | 4.0  | 1278.3184 | 3 | 32.50 | 6        | F6:1562 | OB5946 H2 Ro.raw | 3.2728E6           | 4        | 4                      | 405   | 439 |                                       | N11:Deamidation (NQ):15.73                           | PEAKS DB  |
| R.NAM(+15.99)FVPHYTLNAHTIVVALN(+.98)GR.A    | Y    | 106.88 | 2454.2478 | 22     | 0.3  | 819.0901  | 3 | 32.82 | 5        | F5:1580 | OB5945 H2 Ro.raw | 1.0956E6           | 4        | 4                      | 383   | 404 | Oxidation (M); Deamidation (NQ)       | M3:Oxidation (M):1000.00;N20:Deamidation (NQ):104.25 | PEAKS DB  |
| R.AHVQVVDN(+.98)GNRVYDEELQEGHVLVVPQNFVAAK.A | Y    | 104.42 | 3831.9180 | 35     | 4.4  | 1278.3188 | 3 | 32.26 | 5        | F5:1553 | OB5945 H2 Ro.raw | 5.1124E6           | 4        | 4                      | 405   | 439 |                                       | N9:Deamidation (NQ):39.44                            | PEAKS DB  |
| R.SVNELDLPLGLW(+31.99)LGLSAQHGTIYR.N        | Y    | 103.31 | 2683.3970 | 24     | 2.4  | 1342.7090 | 2 | 39.79 | 4        | F4:1852 | OB5922 H2 Ro.raw | 7.442E4            | 1        | 1                      | 359   | 382 |                                       | W12:Dihydroxy:44.28                                  | PEAKS PTM |
| K.TDSRPSIANLAGENSIIDNLPEEVVANSYRLPR.E       | Y    | 99.31  | 3609.8386 | 33     | 3.4  | 903.4700  | 4 | 37.52 | 4        | F4:1753 | OB5922 H2 Ro.raw | 2.5873E7           | 4        | 4                      | 452   | 484 |                                       |                                                      | PEAKS DB  |
| N.GIEETIC(+57.02)SASVK.K                    | Y    | 94.29  | 1292.6282 | 12     | 0.9  | 647.3220  | 2 | 29.26 | 6        | F6:1364 | OB5946 H2 Ro.raw | 6.9435E4           | 3        | 3                      | 327   | 338 | Carbamidomethylation                  | C7:Carbamidomethylation:1000.00                      | PEAKS DB  |
| K.FFVPPFDHQMRE.V                            | Y    | 93.17  | 1635.7504 | 13     | 0.3  | 818.8827  | 2 | 32.86 | 4        | F4:1440 | OB5922 H2 Ro.raw | 2.6869E6           | 5        | 5                      | 498   | 510 |                                       |                                                      | PEAKS DB  |
| K.A(+57.02)QSENIEYLAFK.T                    | Y    | 91.59  | 1518.6990 | 12     | -0.7 | 760.3562  | 2 | 31.51 | 5        | F5:1505 | OB5945 H2 Ro.raw | 1.9478E5           | 3        | 3                      | 440   | 451 | Carbamidomethylation (DHKE, X@N-term) | A1:Carbamidomethylation (DHKE, X@N-term):56.34       | PEAKS PTM |
| K.TDSRPSIANLAGENSIIDNLPEEVVAN(+.98)SYR.L    | Y    | 82.09  | 3244.5847 | 30     | 1.7  | 1082.5374 | 3 | 35.58 | 5        | F5:1746 | OB5945 H2 Ro.raw | 0                  | 0        | 0                      | 452   | 481 | Deamidation (NQ)                      | N27:Deamidation (NQ):78.75                           | PEAKS DB  |

total 46 peptides

| Peptide                                          | Uniq | -10lgP | Mass      | Length | ppm  | m/z       | z | RT    | Fraction | Scan    | Source File      | Area Roast Ara h 2 | #Feature | #Feature Roast Ara h 2 | Start | End | PTM                  | AScore                                                                         | Found By  |
|--------------------------------------------------|------|--------|-----------|--------|------|-----------|---|-------|----------|---------|------------------|--------------------|----------|------------------------|-------|-----|----------------------|--------------------------------------------------------------------------------|-----------|
| R.NAM(+15.99)FVPHYTLN(+.98)AHTIVVALNGR.A         | Y    | 76.23  | 2454.2478 | 22     | 1.2  | 819.0908  | 3 | 33.30 | 5        | F5:1613 | OB5945 H2 Ro.raw | 0                  | 0        | 0                      | 383   | 404 | Oxidation (M)        | M3:Oxidation (M):1000.00;N11:Deamidation (NQ):0.00                             | PEAKS DB  |
| R.VYDEELQEGHVLVVPQNFAVA.A                        | Y    | 75.46  | 2554.3066 | 23     | 0.5  | 852.4432  | 3 | 33.26 | 6        | F6:1608 | OB5946 H2 Ro.raw | 2.0809E4           | 1        | 1                      | 417   | 439 |                      |                                                                                | PEAKS DB  |
| R.LNAQRPDNRIESEGGYIETWNPNNQEFQC(+57.02)AGVALSR.T | Y    | 73.52  | 4132.9409 | 36     | 2.1  | 1034.2446 | 4 | 32.69 | 6        | F6:1579 | OB5946 H2 Ro.raw | 1.2843E5           | 1        | 1                      | 37    | 72  | Carbamidomethylation | C29:Carbamido methylation:1000.00                                              | PEAKS DB  |
| N.GIEETIC(+57.02)SASVKK.N                        | Y    | 72.67  | 1420.7231 | 13     | 1.3  | 711.3698  | 2 | 28.13 | 4        | F4:1149 | OB5922 H2 Ro.raw | 1.93E5             | 3        | 3                      | 327   | 339 | Carbamidomethylation | C7:Carbamido methylation:1000.00                                               | PEAKS DB  |
| K.FFVPPFDHQSM(+15.99)RE.V                        | Y    | 67.96  | 1651.7452 | 13     | 1.7  | 826.8813  | 2 | 32.49 | 4        | F4:1425 | OB5922 H2 Ro.raw | 7.5314E5           | 4        | 4                      | 498   | 510 | Oxidation (M)        | M11:Oxidation (M):1000.00                                                      | PEAKS DB  |
| R.Q(-17.03)LKNNNPFK.F                            | N    | 67.76  | 1084.5665 | 9      | 1.6  | 543.2914  | 2 | 28.75 | 5        | F5:1346 | OB5945 H2 Ro.raw | 1.0606E4           | 2        | 2                      | 489   | 497 | Pyro-glu from Q      | Q1:Pyro-glu from Q:1000.00                                                     | PEAKS PTM |
| R.AHVQVVDN(+.98)GN(+.98)RVYDEELQEGHVLVVPQNFAVA.A | Y    | 66.65  | 3832.9019 | 35     | 7.9  | 767.5937  | 5 | 32.26 | 5        | F5:1556 | OB5945 H2 Ro.raw | 3.9346E5           | 1        | 1                      | 405   | 439 |                      | N9:Deamidation (NQ):5.83;N11:Deamidation (NQ):8.28                             | PEAKS DB  |
| R.N(+.98)AMFVPHYTLNAHTIVVALNGR.A                 | Y    | 66.31  | 2438.2529 | 22     | 3.0  | 1220.1375 | 2 | 33.96 | 5        | F5:1680 | OB5945 H2 Ro.raw | 9.5447E5           | 1        | 1                      | 383   | 404 | Deamidation (NQ)     | N1:Deamidation (NQ):63.03                                                      | PEAKS DB  |
| V.PQNFAVA.A                                      | N    | 63.04  | 944.5079  | 9      | 0.9  | 473.2617  | 2 | 32.86 | 4        | F4:1447 | OB5922 H2 Ro.raw | 2.0461E6           | 3        | 3                      | 431   | 439 |                      |                                                                                | PEAKS DB  |
| R.NAMFVPHYTLNAH(+57.02)TIVVALNGR.A               | Y    | 62.29  | 2494.2903 | 22     | -3.1 | 832.4348  | 3 | 34.84 | 5        | F5:1702 | OB5945 H2 Ro.raw | 0                  | 0        | 0                      | 383   | 404 |                      | H13:Carbamido methylation (DHKE, X@N-term):5.30                                | PEAKS PTM |
| K.FFVPPFDHQSM.R                                  | Y    | 62.13  | 1350.6067 | 11     | 0.3  | 676.3108  | 2 | 34.60 | 6        | F6:1680 | OB5946 H2 Ro.raw | 2.36E5             | 3        | 3                      | 498   | 508 |                      |                                                                                | PEAKS DB  |
| K.AQSENIEYLAFKTSRPSIANLAGENSIIDNLPEEVVANSYR.L    | Y    | 61.90  | 4687.2676 | 42     | 3.1  | 1172.8278 | 4 | 36.79 | 5        | F5:1810 | OB5945 H2 Ro.raw | 2.0852E6           | 1        | 1                      | 440   | 481 |                      |                                                                                | PEAKS DB  |
| D.LPILGWLGLSAQHGTIYR.N                           | Y    | 60.41  | 1994.1101 | 18     | 2.4  | 998.0647  | 2 | 40.55 | 4        | F4:1901 | OB5922 H2 Ro.raw | 1.1908E5           | 1        | 1                      | 365   | 382 |                      |                                                                                | PEAKS DB  |
| K.FFVPPFDHQS.M                                   | Y    | 57.76  | 1219.5662 | 10     | 1.5  | 610.7913  | 2 | 33.58 | 5        | F5:1616 | OB5945 H2 Ro.raw | 2.2184E5           | 2        | 2                      | 498   | 507 |                      |                                                                                | PEAKS DB  |
| R.SVN(+.98)ELDLPILGWLGLSAQHGTIYR.N               | Y    | 54.93  | 2652.3911 | 24     | 9.1  | 1327.2150 | 2 | 46.79 | 4        | F4:2254 | OB5922 H2 Ro.raw | 0                  | 0        | 0                      | 359   | 382 | Deamidation (NQ)     | N3:Deamidation (NQ):57.31                                                      | PEAKS DB  |
| K.NNNPFKFFVPPFDHQSMRE.V                          | Y    | 53.67  | 2350.0952 | 19     | 1.4  | 784.3734  | 3 | 34.54 | 5        | F5:1693 | OB5945 H2 Ro.raw | 4.2082E5           | 2        | 2                      | 492   | 510 |                      |                                                                                | PEAKS DB  |
| N.G(+57.02)IEETIC(+57.02)SASVKK.N                | Y    | 52.58  | 1477.7446 | 13     | -0.5 | 739.8792  | 2 | 28.58 | 4        | F4:1182 | OB5922 H2 Ro.raw | 1.8561E4           | 2        | 2                      | 327   | 339 | Carbamidomethylation | G1:Carbamido methylation (DHKE, X@N-term):2.85;C7:Carbamidomethylation:1000.00 | PEAKS PTM |
| R.AHVQ(+.98)VVDNNGNRVYDEELQEGHVLVVPQNFAVA.A      | Y    | 49.71  | 3831.9180 | 35     | 2.7  | 767.3929  | 5 | 32.86 | 4        | F4:1451 | OB5922 H2 Ro.raw | 3.9416E5           | 1        | 1                      | 405   | 439 |                      | Q4:Deamidation (NQ):0.00                                                       | PEAKS DB  |

total 46 peptides



| Peptide                                       | Uniq | -10lgP | Mass      | Length | ppm  | m/z       | z | RT    | Fraction | Scan    | Source File      | Area Roast Ara h 2 | #Feature | #Feature Roast Ara h 2 | Start | End | PTM                                                                                       | AScore                                                                                                       | Found By  |
|-----------------------------------------------|------|--------|-----------|--------|------|-----------|---|-------|----------|---------|------------------|--------------------|----------|------------------------|-------|-----|-------------------------------------------------------------------------------------------|--------------------------------------------------------------------------------------------------------------|-----------|
| N,G(+41.03)IETIC(+57.02)SASVK,K               | Y    | 48.35  | 1333.6548 | 12     | 0.4  | 667.8350  | 2 | 29.26 | 6        | F6:1372 | OB5946 H2 Ro.raw | 8,2083E3           | 1        | 1                      | 327   | 338 | Amidination of lysines or N-terminal amines with methyl acetimidate; Carbamidomethylation | G1:Amidination of lysines or N-terminal amines with methyl acetimidate:71.87; C7:Carbamidomethylation:100.00 | PEAKS PTM |
| R,NAMFVPHYTLNAH(+57.02)TIVVALN(+.98)GR.A      | Y    | 47.39  | 2495.2744 | 22     | 0.0  | 832.7654  | 3 | 33.96 | 5        | F5:1660 | OB5945 H2 Ro.raw | 1,2865E5           | 1        | 1                      | 383   | 404 |                                                                                           | H13:Carbamidomethylation (DHKE, X@N-term):0.00;N20:Deamidation (NQ):43.52                                    | PEAKS PTM |
| K,FFVPPFDHQS(+15.99).R                        | Y    | 45.84  | 1366.6016 | 11     | 1.6  | 684.3091  | 2 | 33.79 | 4        | F4:1494 | OB5922 H2 Ro.raw | 5,6927E4           | 1        | 1                      | 498   | 508 | Oxidation (M)                                                                             | M11:Oxidation (M):1000.00                                                                                    | PEAKS DB  |
| K,TDSRPSIANLAGENSIIDNLPEEVAN(+.98)SYRLPR,E    | Y    | 45.48  | 3610.8225 | 33     | 5.4  | 1204.6213 | 3 | 35.38 | 5        | F5:1734 | OB5945 H2 Ro.raw | 0                  | 0        | 0                      | 452   | 484 |                                                                                           | N27:Deamidation (NQ):32.94                                                                                   | PEAKS DB  |
| R,S(+57.02)SNPDIYNPQAGSLR,S                   | Y    | 39.95  | 1674.7961 | 15     | 7.9  | 838.4119  | 2 | 29.48 | 4        | F4:1242 | OB5922 H2 Ro.raw | 0                  | 0        | 0                      | 344   | 358 |                                                                                           | S1:Carbamidomethylation (DHKE, X@N-term):11.12                                                               | PEAKS PTM |
| R,SSNPD(+21.98)IYNPQAGSLR,S                   | Y    | 39.67  | 1639.7566 | 15     | 4.2  | 820.8890  | 2 | 29.21 | 4        | F4:1226 | OB5922 H2 Ro.raw | 0                  | 0        | 0                      | 344   | 358 |                                                                                           | D5:Sodium adduct:43.70                                                                                       | PEAKS PTM |
| K,AQSENYE(+21.98)YLAFAK,T                     | Y    | 37.74  | 1483.6595 | 12     | -1.5 | 742.8359  | 2 | 31.58 | 6        | F6:1513 | OB5946 H2 Ro.raw | 8,2984E3           | 1        | 1                      | 440   | 451 |                                                                                           | E7:Sodium adduct:0.00                                                                                        | PEAKS PTM |
| K,NGIETIC(+71.04)SASVKK,N                     | Y    | 36.28  | 1548.7817 | 14     | 3.3  | 775.4007  | 2 | 29.48 | 5        | F5:1385 | OB5945 H2 Ro.raw | 2,1762E3           | 1        | 1                      | 326   | 339 | Propionamide                                                                              | C8:Propionamide:1000.00                                                                                      | PEAKS PTM |
| R,SVNELDLPILGWLGLSAQHGTIY(+31.99)R,N          | Y    | 36.02  | 2683.3970 | 24     | 3.4  | 895.4760  | 3 | 39.79 | 4        | F4:1960 | OB5922 H2 Ro.raw | 9,7778E5           | 1        | 1                      | 359   | 382 |                                                                                           | Y23:Dihydroxy:0.00                                                                                           | PEAKS PTM |
| K,TDSRPSIAN(+.98)LAGEN(+.98)SIIDNLPEEVANSYR,L | Y    | 35.41  | 3245.5686 | 30     | 4.2  | 1082.8680 | 3 | 47.69 | 4        | F4:2306 | OB5922 H2 Ro.raw | 0                  | 0        | 0                      | 452   | 481 |                                                                                           | N9:Deamidation (NQ):12.20;N14:Deamidation (NQ):10.19                                                         | PEAKS DB  |
| total 46 peptides                             |      |        |           |        |      |           |   |       |          |         |                  |                    |          |                        |       |     |                                                                                           |                                                                                                              |           |

Q9FZ11|Q9FZ11\_ARAHY

[back to list](#)

| [Protein Coverage](#) | [Supporting Peptides](#) |

Protein Coverage:

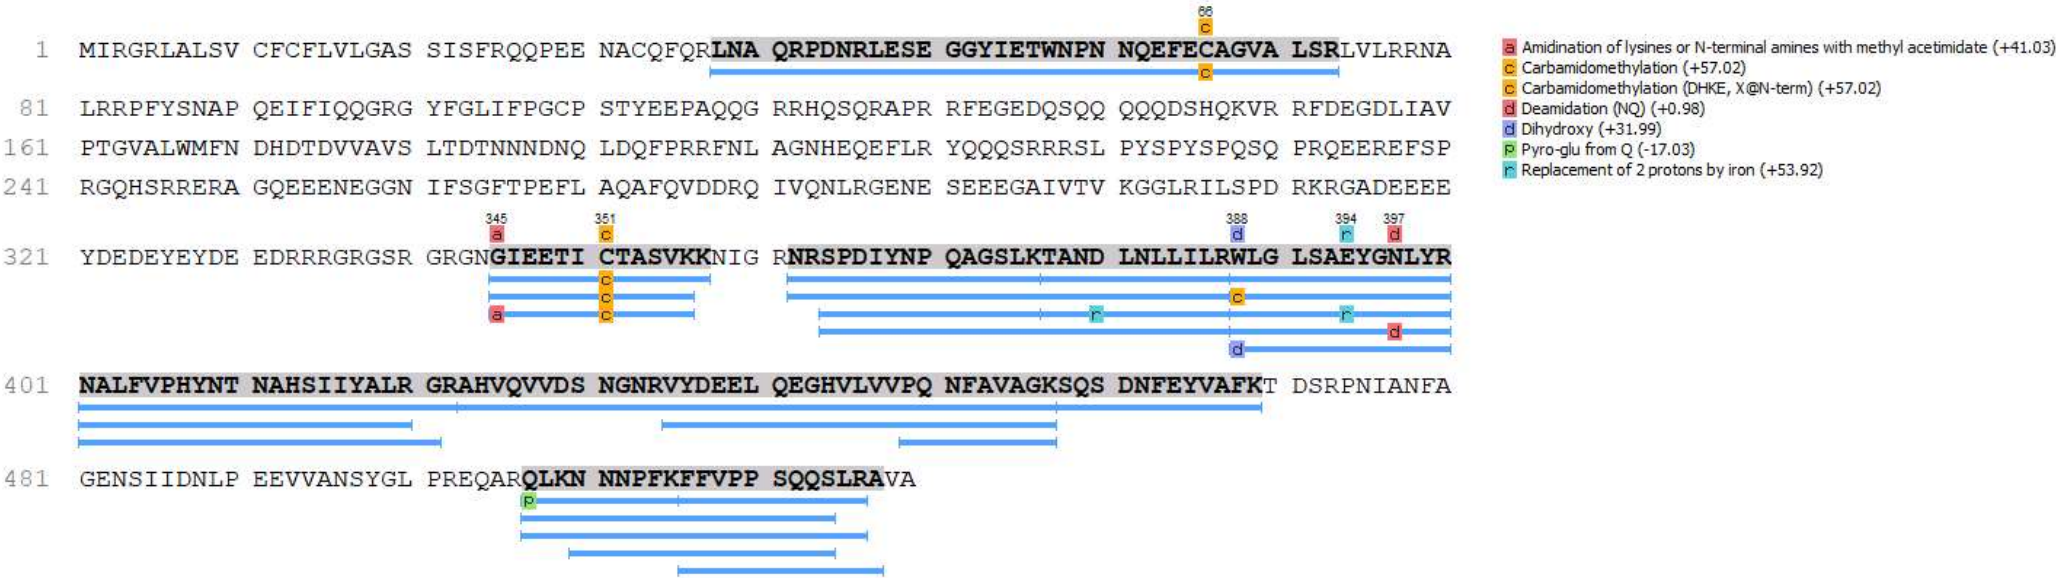

Supporting Peptides:

| Peptide                       | Uniq | -10lgP | Mass      | Length | ppm  | m/z       | z | RT    | Fraction | Scan    | Source File      | Area Roast Ara h 2 | #Feature | #Feature Roast Ara h 2 | Start | End | PTM                  | AScore                          | Found By |
|-------------------------------|------|--------|-----------|--------|------|-----------|---|-------|----------|---------|------------------|--------------------|----------|------------------------|-------|-----|----------------------|---------------------------------|----------|
| R.NALFVPHYNTNAHSIIYALR.G      | N    | 151.62 | 2313.2019 | 20     | 3.7  | 1157.6125 | 2 | 33.79 | 4        | F4:1486 | OB5922 H2 Ro.raw | 4.79E7             | 11       | 11                     | 401   | 420 |                      |                                 | PEAKS DB |
| R.SPDIYNPQAGSLKTANDLNLILR.W   | N    | 150.50 | 2625.4126 | 24     | -0.1 | 876.1447  | 3 | 35.61 | 4        | F4:1607 | OB5922 H2 Ro.raw | 1.276E6            | 3        | 3                      | 364   | 387 |                      |                                 | PEAKS DB |
| R.WLGLSAEYGNLYR.N             | N    | 145.22 | 1540.7673 | 13     | 3.5  | 771.3937  | 2 | 36.40 | 4        | F4:1654 | OB5922 H2 Ro.raw | 5.6282E7           | 22       | 22                     | 388   | 400 |                      |                                 | PEAKS DB |
| K.SQSDNFEYVAFK.T              | N    | 136.19 | 1433.6462 | 12     | 2.6  | 717.8323  | 2 | 31.76 | 6        | F6:1518 | OB5946 H2 Ro.raw | 5.1214E6           | 3        | 3                      | 458   | 469 |                      |                                 | PEAKS DB |
| R.NRSPDIYNPQAGSLKTANDLNLILR.W | N    | 129.49 | 2895.5566 | 26     | 1.6  | 966.1943  | 3 | 34.35 | 4        | F4:1530 | OB5922 H2 Ro.raw | 2.2791E6           | 6        | 6                      | 362   | 387 |                      |                                 | PEAKS DB |
| K.FFVPPSQQSLRA.V              | Y    | 119.32 | 1375.7247 | 12     | 2.6  | 688.8715  | 2 | 30.85 | 6        | F6:1464 | OB5946 H2 Ro.raw | 1.4487E6           | 3        | 3                      | 516   | 527 |                      |                                 | PEAKS DB |
| K.FFVPPSQQSLR.A               | Y    | 110.32 | 1304.6876 | 11     | 0.7  | 653.3516  | 2 | 30.28 | 6        | F6:1421 | OB5946 H2 Ro.raw | 4.7622E5           | 3        | 3                      | 516   | 526 |                      |                                 | PEAKS DB |
| R.VYDEELQEGHVLVVPQNFAVAGK.S   | N    | 102.31 | 2540.2910 | 23     | 1.4  | 847.7721  | 3 | 33.42 | 4        | F4:1478 | OB5922 H2 Ro.raw | 1.4453E6           | 6        | 6                      | 435   | 457 |                      |                                 | PEAKS DB |
| R.SPDIYNPQAGSLK.T             | N    | 95.77  | 1388.6936 | 13     | 1.7  | 695.3552  | 2 | 28.58 | 5        | F5:1323 | OB5945 H2 Ro.raw | 5.949E5            | 3        | 3                      | 364   | 376 |                      |                                 | PEAKS DB |
| N.GIEETIC(+57.02)TASVK.K      | N    | 94.89  | 1306.6438 | 12     | 0.9  | 654.3298  | 2 | 29.08 | 6        | F6:1349 | OB5946 H2 Ro.raw | 1.2427E5           | 3        | 3                      | 345   | 356 | Carbamidomethylation | C7:Carbamidomethylation:1000.00 | PEAKS DB |

total 42 peptides

| Peptide                                       | Uniq | -10lgP | Mass      | Length | ppm  | m/z      | z | RT    | Fraction | Scan    | Source File      | Area Roast Ara h 2 | #Feature | #Feature Roast Ara h 2 | Start | End | PTM                                                                                       | AScore                                                                                                        | Found By  |
|-----------------------------------------------|------|--------|-----------|--------|------|----------|---|-------|----------|---------|------------------|--------------------|----------|------------------------|-------|-----|-------------------------------------------------------------------------------------------|---------------------------------------------------------------------------------------------------------------|-----------|
| R.NALFVPH(+14.02)YNTNAHSIIYALR.G              | N    | 93.74  | 2327.2175 | 20     | 0.7  | 776.7470 | 3 | 34.91 | 4        | F4:1561 | OB5922 H2 Ro.raw | 1.3103E6           | 3        | 3                      | 401   | 420 |                                                                                           | H7:Methylation(others):22.45                                                                                  | PEAKS PTM |
| R.NRSPDIYNPQAGSLK.T                           | N    | 91.67  | 1658.8376 | 15     | 0.8  | 830.4268 | 2 | 28.33 | 6        | F6:1298 | OB5946 H2 Ro.raw | 4.0221E5           | 6        | 6                      | 362   | 376 |                                                                                           |                                                                                                               | PEAKS DB  |
| R.AHVQVVDSNGNRVYDEELQEGHVLVVPQNFAVAGK.S       | N    | 90.86  | 3816.9182 | 35     | 3.6  | 955.2402 | 4 | 32.32 | 6        | F6:1544 | OB5946 H2 Ro.raw | 8.2893E6           | 8        | 8                      | 423   | 457 |                                                                                           |                                                                                                               | PEAKS DB  |
| R.QLKNNNPFFKFFVPPSQSLR.A                      | Y    | 86.55  | 2388.2703 | 20     | 2.2  | 797.0991 | 3 | 33.23 | 4        | F4:1468 | OB5922 H2 Ro.raw | 1.3469E5           | 1        | 1                      | 507   | 526 |                                                                                           |                                                                                                               | PEAKS DB  |
| K.TANDLNLILR.W                                | N    | 85.96  | 1254.7296 | 11     | 1.8  | 628.3732 | 2 | 34.79 | 6        | F6:1750 | OB5946 H2 Ro.raw | 9.2784E6           | 3        | 3                      | 377   | 387 |                                                                                           |                                                                                                               | PEAKS DB  |
| V.PQNFAVAGK.S                                 | N    | 85.45  | 930.4923  | 9      | 1.0  | 466.2539 | 2 | 32.32 | 6        | F6:1542 | OB5946 H2 Ro.raw | 3.3444E6           | 3        | 3                      | 449   | 457 |                                                                                           |                                                                                                               | PEAKS DB  |
| N.GIEETIC(+57.02)TASVKK.N                     | N    | 84.54  | 1434.7388 | 13     | 0.2  | 718.3768 | 2 | 28.07 | 4        | F4:1177 | OB5922 H2 Ro.raw | 2.0536E5           | 4        | 4                      | 345   | 357 | Carbamidomethylation                                                                      | C7:Carbamidomethylation:1000.00                                                                               | PEAKS DB  |
| R.W(+31.99)LGLSAEYGNLYR.N                     | N    | 77.74  | 1572.7572 | 13     | -1.6 | 787.3846 | 2 | 33.64 | 6        | F6:1624 | OB5946 H2 Ro.raw | 8.5976E4           | 2        | 2                      | 388   | 400 | Dihydroxy                                                                                 | W1:Dihydroxy:62.93                                                                                            | PEAKS PTM |
| R.S(+57.02)PDIYNPQAGSLKTANDLNLILR.W           | N    | 75.36  | 2682.4341 | 24     | 1.5  | 895.1533 | 3 | 35.28 | 5        | F5:1735 | OB5945 H2 Ro.raw | 9.5441E4           | 1        | 1                      | 364   | 387 |                                                                                           | S1:Carbamidomethylation (DHKE, X@N-term):14.04                                                                | PEAKS PTM |
| R.AHVQVVDSN(+.98)GNRVYDEELQEGHVLVVPQNFAVAGK.S | N    | 75.25  | 3817.9023 | 35     | 5.0  | 955.4877 | 4 | 33.04 | 4        | F4:1438 | OB5922 H2 Ro.raw | 1.3721E6           | 1        | 1                      | 423   | 457 |                                                                                           | N9:Deamidation (N Q):4.64                                                                                     | PEAKS DB  |
| K.FFVPPSQ(+.98)SLR.A                          | Y    | 69.30  | 1305.6716 | 11     | 0.6  | 653.8435 | 2 | 31.03 | 6        | F6:1505 | OB5946 H2 Ro.raw | 1.7874E5           | 1        | 1                      | 516   | 526 |                                                                                           | Q8:Deamidation (N Q):12.79                                                                                    | PEAKS DB  |
| R.AHVQVVDSNGN(+.98)RVYDEELQEGHVLVVPQNFAVAGK.S | N    | 68.98  | 3817.9023 | 35     | 3.2  | 955.4859 | 4 | 32.51 | 5        | F5:1567 | OB5945 H2 Ro.raw | 0                  | 0        | 0                      | 423   | 457 |                                                                                           | N11:Deamidation (NQ):8.22                                                                                     | PEAKS DB  |
| R.Q(-17.03)LKNNNPFFK.F                        | N    | 67.76  | 1084.5665 | 9      | 1.6  | 543.2914 | 2 | 28.75 | 5        | F5:1346 | OB5945 H2 Ro.raw | 1.0606E4           | 2        | 2                      | 507   | 515 | Pyro-glu from Q                                                                           | Q1:Pyro-glu from Q:1000.00                                                                                    | PEAKS PTM |
| R.W(+57.02)LGLSAEYGNLYR.N                     | N    | 65.45  | 1597.7888 | 13     | 0.6  | 799.9022 | 2 | 35.09 | 5        | F5:1725 | OB5945 H2 Ro.raw | 1.848E4            | 1        | 1                      | 388   | 400 | Carbamidomethylation (DHKE, X@N-term)                                                     | W1:Carbamidomethylation (DHKE, X@N-term):62.19                                                                | PEAKS PTM |
| R.WLGLSAE(+53.92)YGNLYR.N                     | N    | 65.30  | 1594.6866 | 13     | 1.3  | 532.5702 | 3 | 34.72 | 5        | F5:1698 | OB5945 H2 Ro.raw | 6.0447E5           | 3        | 3                      | 388   | 400 | Replacement of 2 protons by iron                                                          | E7:Replacement of 2 protons by iron:123.05                                                                    | PEAKS PTM |
| R.S(+57.02)PDIYNPQAGSLK.T                     | N    | 64.83  | 1445.7150 | 13     | 5.7  | 723.8689 | 2 | 28.94 | 5        | F5:1350 | OB5945 H2 Ro.raw | 6.4489E3           | 2        | 2                      | 364   | 376 |                                                                                           | S1:Carbamidomethylation (DHKE, X@N-term):14.04                                                                | PEAKS PTM |
| N.G(+41.03)IEETIC(+57.02)TASVK.K              | N    | 63.11  | 1347.6704 | 12     | 0.3  | 674.8427 | 2 | 29.12 | 5        | F5:1370 | OB5945 H2 Ro.raw | 1.5496E4           | 1        | 1                      | 345   | 356 | Amidination of lysines or N-terminal amines with methyl acetimidate; Carbamidomethylation | G1:Amidination of lysines or N-terminal amines with methyl acetimidate:96.48; C7:Carbamidomethylation:1000.00 | PEAKS PTM |
| R.NALFVPHYNTNAHSIIYALRG.R                     | N    | 61.88  | 2370.2231 | 21     | 1.2  | 791.0826 | 3 | 33.77 | 5        | F5:1624 | OB5945 H2 Ro.raw | 4.2894E6           | 2        | 2                      | 401   | 421 |                                                                                           |                                                                                                               | PEAKS DB  |

total 42 peptides

| Peptide                                          | Uniq | -10lgP | Mass      | Length | ppm  | m/z       | z | RT    | Fraction | Scan    | Source File      | Area Roast Ara h 2 | #Feature | #Feature Roast Ara h 2 | Start | End | PTM                              | AScore                                                                         | Found By  |
|--------------------------------------------------|------|--------|-----------|--------|------|-----------|---|-------|----------|---------|------------------|--------------------|----------|------------------------|-------|-----|----------------------------------|--------------------------------------------------------------------------------|-----------|
| R.N(+57.02)ALFVPHYNTNAHSIIYALR.G                 | N    | 59.27  | 2370.2231 | 20     | -0.1 | 791.0816  | 3 | 34.53 | 4        | F4:1557 | OB5922 H2 Ro.raw | 3.2966E6           | 1        | 1                      | 401   | 420 |                                  | N1:Carbamidomethylation (DHKE, X@N-term):10.82                                 | PEAKS PTM |
| R.SPD(+57.02)IYNPQAGSLK.T                        | N    | 55.35  | 1445.7150 | 13     | 2.2  | 723.8663  | 2 | 29.51 | 4        | F4:1244 | OB5922 H2 Ro.raw | 0                  | 0        | 0                      | 364   | 376 |                                  | D3:Carbamidomethylation (DHKE, X@N-term):0.00                                  | PEAKS PTM |
| R.AHVQVVDSNGNRVYDEELQ(+.98)EGHVLVVPQNFAVAGK.S    | N    | 53.98  | 3817.9023 | 35     | 7.9  | 955.4904  | 4 | 33.43 | 6        | F6:1615 | OB5946 H2 Ro.raw | 0                  | 0        | 0                      | 423   | 457 |                                  | Q19:Deamidation (NQ):4.91                                                      | PEAKS DB  |
| K.SQSD(+53.92)NFEYVAFK.T                         | N    | 53.30  | 1487.5656 | 12     | -2.8 | 744.7880  | 2 | 32.03 | 4        | F4:1395 | OB5922 H2 Ro.raw | 0                  | 0        | 0                      | 458   | 469 |                                  | D4:Replacement of 2 protons by iron:20.50                                      | PEAKS PTM |
| K.NNNPFKFFVPPSQQS.L                              | N    | 52.69  | 1749.8474 | 15     | 1.0  | 875.9319  | 2 | 34.91 | 4        | F4:1573 | OB5922 H2 Ro.raw | 4.7342E4           | 1        | 1                      | 510   | 524 |                                  |                                                                                | PEAKS DB  |
| R.QLKNNNPFKFFVPPSQQS.L                           | N    | 51.09  | 2119.0850 | 18     | 1.9  | 707.3703  | 3 | 33.27 | 6        | F6:1604 | OB5946 H2 Ro.raw | 6.7737E4           | 1        | 1                      | 507   | 524 |                                  |                                                                                | PEAKS DB  |
| K.TAND(+53.92)LNLLILR.W                          | N    | 50.78  | 1308.6488 | 11     | 0.2  | 655.3318  | 2 | 35.09 | 4        | F4:1584 | OB5922 H2 Ro.raw | 8.7715E4           | 1        | 1                      | 377   | 387 | Replacement of 2 protons by iron | D4:Replacement of 2 protons by iron:55.73                                      | PEAKS PTM |
| R.LNAQRPDNRLESEGGYIETWNPNNQEFEC(+57.02)AGVALSR.L | N    | 50.20  | 4133.9248 | 36     | 7.4  | 1034.4961 | 4 | 33.23 | 4        | F4:1476 | OB5922 H2 Ro.raw | 5.4856E4           | 1        | 1                      | 38    | 73  | Carbamidomethylation             | C29:Carbamidomethylation:1000.00                                               | PEAKS DB  |
| R.NALFVPH(+57.02)YNTNAHSIIYALR.G                 | N    | 49.15  | 2370.2231 | 20     | 0.1  | 791.0817  | 3 | 34.03 | 6        | F6:1601 | OB5946 H2 Ro.raw | 8.9747E5           | 1        | 1                      | 401   | 420 |                                  | H7:Carbamidomethylation (DHKE, X@N-term):20.35                                 | PEAKS PTM |
| R.WLGLSAEYGN(+.98)LYR.N                          | N    | 47.40  | 1541.7513 | 13     | 5.4  | 771.8871  | 2 | 54.24 | 4        | F4:2679 | OB5922 H2 Ro.raw | 0                  | 0        | 0                      | 388   | 400 | Deamidation (NQ)                 | N10:Deamidation (NQ):1000.00                                                   | PEAKS DB  |
| R.NALFVPHYNTNAHSIIYALRGR.A                       | N    | 46.11  | 2526.3245 | 22     | 0.6  | 843.1160  | 3 | 33.60 | 4        | F4:1492 | OB5922 H2 Ro.raw | 7.6168E5           | 2        | 2                      | 401   | 422 |                                  |                                                                                | PEAKS DB  |
| N.G(+57.02)IETIC(+57.02)TASVKK.N                 | N    | 41.72  | 1491.7603 | 13     | 2.0  | 746.8889  | 2 | 28.52 | 4        | F4:1178 | OB5922 H2 Ro.raw | 9.4457E3           | 1        | 1                      | 345   | 357 | Carbamidomethylation             | G1:Carbamidomethylation (DHKE, X@N-term):12.81;C7:Carbamidomethylation:1000.00 | PEAKS PTM |
| R.N(+.98)ALFVPHYNTNAHSIIYALR.G                   | N    | 38.37  | 2314.1858 | 20     | 7.3  | 772.4082  | 3 | 50.66 | 4        | F4:2450 | OB5922 H2 Ro.raw | 1.0573E4           | 1        | 1                      | 401   | 420 |                                  | N1:Deamidation (NQ):32.94                                                      | PEAKS DB  |
| R.WLGLSAE(+21.98)YGNLYR.N                        | N    | 36.57  | 1562.7494 | 13     | -8.4 | 782.3754  | 2 | 35.27 | 4        | F4:1583 | OB5922 H2 Ro.raw | 5.0047E4           | 2        | 2                      | 388   | 400 |                                  | E7:Sodium adduct:42.78                                                         | PEAKS PTM |
| total 42 peptides                                |      |        |           |        |      |           |   |       |          |         |                  |                    |          |                        |       |     |                                  |                                                                                |           |

Q647H3|Q647H3\_ARAHY

[back to list](#)

| [Protein Coverage](#) | [Supporting Peptides](#) |

Protein Coverage:

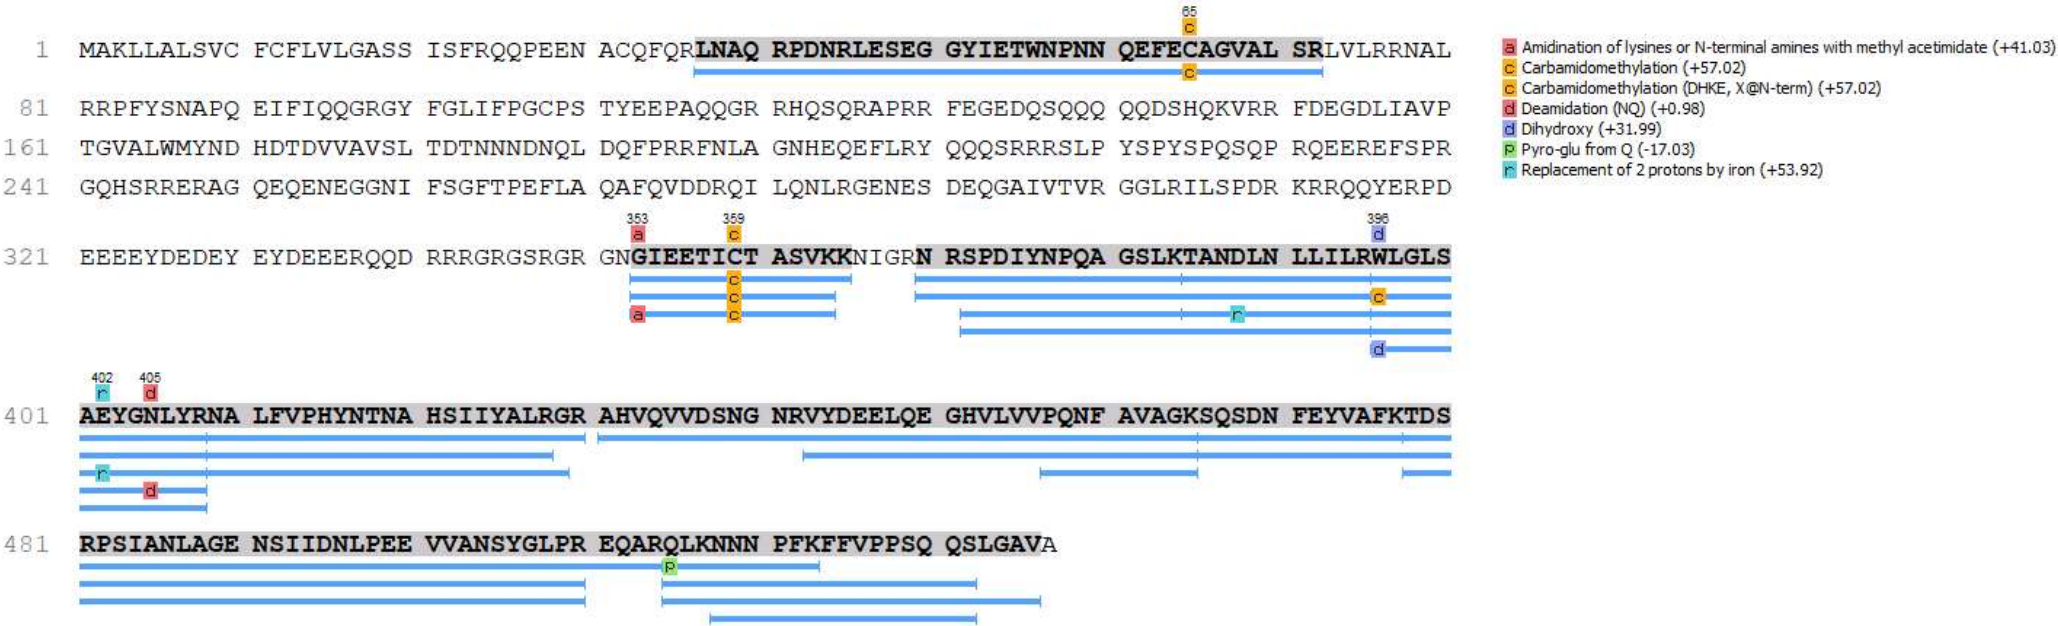

Supporting Peptides:

| Peptide                               | Uniq | -10lgP | Mass      | Length | ppm  | m/z       | z | RT    | Fraction | Scan    | Source File      | Area Roast Ara h 2 | #Feature | #Feature Roast Ara h 2 | Start | End | PTM                  | AScore                          | Found By |
|---------------------------------------|------|--------|-----------|--------|------|-----------|---|-------|----------|---------|------------------|--------------------|----------|------------------------|-------|-----|----------------------|---------------------------------|----------|
| R,NALFVPHYNTNAHSIIYALR,G              | N    | 151.62 | 2313.2019 | 20     | 3.7  | 1157.6125 | 2 | 33.79 | 4        | F4:1486 | OB5922 H2 Ro.raw | 4.79E7             | 11       | 11                     | 409   | 428 |                      |                                 | PEAKS DB |
| R,SPDIYNPQAGSLKTANDLNLLILR,W          | N    | 150.50 | 2625.4126 | 24     | -0.1 | 876.1447  | 3 | 35.61 | 4        | F4:1607 | OB5922 H2 Ro.raw | 1.276E6            | 3        | 3                      | 372   | 395 |                      |                                 | PEAKS DB |
| R,WLGLSAEYGNLYR,N                     | N    | 145.22 | 1540.7673 | 13     | 3.5  | 771.3937  | 2 | 36.40 | 4        | F4:1654 | OB5922 H2 Ro.raw | 5.6282E7           | 22       | 22                     | 396   | 408 |                      |                                 | PEAKS DB |
| K,TDSRPSIANLAGENSIIDNLPEEVVANSYGLPR,E | Y    | 143.06 | 3510.7590 | 33     | 5.7  | 1171.2670 | 3 | 37.70 | 4        | F4:1764 | OB5922 H2 Ro.raw | 6.2773E7           | 10       | 10                     | 478   | 510 |                      |                                 | PEAKS DB |
| K,SQSDNFEYVAFK,T                      | N    | 136.19 | 1433.6462 | 12     | 2.6  | 717.8323  | 2 | 31.76 | 6        | F6:1518 | OB5946 H2 Ro.raw | 5.1214E6           | 3        | 3                      | 466   | 477 |                      |                                 | PEAKS DB |
| R,NRSPDIYNPQAGSLKTANDLNLLILR,W        | N    | 129.49 | 2895.5566 | 26     | 1.6  | 966.1943  | 3 | 34.35 | 4        | F4:1530 | OB5922 H2 Ro.raw | 2.2791E6           | 6        | 6                      | 370   | 395 |                      |                                 | PEAKS DB |
| R,VYDEELQEGHVLVVPQNFAVAGK,S           | N    | 102.31 | 2540.2910 | 23     | 1.4  | 847.7721  | 3 | 33.42 | 4        | F4:1478 | OB5922 H2 Ro.raw | 1.4453E6           | 6        | 6                      | 443   | 465 |                      |                                 | PEAKS DB |
| R,SPDIYNPQAGSLK,T                     | N    | 95.77  | 1388.6936 | 13     | 1.7  | 695.3552  | 2 | 28.58 | 5        | F5:1323 | OB5945 H2 Ro.raw | 5.949E5            | 3        | 3                      | 372   | 384 |                      |                                 | PEAKS DB |
| N,GIEETIC(+57.02)TASVK,K              | N    | 94.89  | 1306.6438 | 12     | 0.9  | 654.3298  | 2 | 29.08 | 6        | F6:1349 | OB5946 H2 Ro.raw | 1.2427E5           | 3        | 3                      | 353   | 364 | Carbamidomethylation | C7:Carbamidomethylation:1000.00 | PEAKS DB |

total 44 peptides

| Peptide                                       | Uniq | -10lgP | Mass      | Length | ppm  | m/z      | z | RT    | Fraction | Scan    | Source File      | Area Roast Ara h 2 | #Feature | #Feature Roast Ara h 2 | Start | End | PTM                                                                                       | AScore                                                                                                      | Found By  |
|-----------------------------------------------|------|--------|-----------|--------|------|----------|---|-------|----------|---------|------------------|--------------------|----------|------------------------|-------|-----|-------------------------------------------------------------------------------------------|-------------------------------------------------------------------------------------------------------------|-----------|
| R.NALFVPH(+14.02)YNTNAHSIIYALR.G              | N    | 93.74  | 2327.2175 | 20     | 0.7  | 776.7470 | 3 | 34.91 | 4        | F4:1561 | OB5922 H2 Ro.raw | 1.3103E6           | 3        | 3                      | 409   | 428 |                                                                                           | H7:Methylation(ot hers):22.45                                                                               | PEAKS PTM |
| R.NRSPDIYNPQAGSLK.T                           | N    | 91.67  | 1658.8376 | 15     | 0.8  | 830.4268 | 2 | 28.33 | 6        | F6:1298 | OB5946 H2 Ro.raw | 4.0221E5           | 6        | 6                      | 370   | 384 |                                                                                           |                                                                                                             | PEAKS DB  |
| R.AHVQVVDSNGNRVYDEELQEGHVLVVPQNFAVAGK.S       | N    | 90.86  | 3816.9182 | 35     | 3.6  | 955.2402 | 4 | 32.32 | 6        | F6:1544 | OB5946 H2 Ro.raw | 8.2893E6           | 8        | 8                      | 431   | 465 |                                                                                           |                                                                                                             | PEAKS DB  |
| K.TANDLNLILR.W                                | N    | 85.96  | 1254.7296 | 11     | 1.8  | 628.3732 | 2 | 34.79 | 6        | F6:1750 | OB5946 H2 Ro.raw | 9.2784E6           | 3        | 3                      | 385   | 395 |                                                                                           |                                                                                                             | PEAKS DB  |
| V.PQNFAVAGK.S                                 | N    | 85.45  | 930.4923  | 9      | 1.0  | 466.2539 | 2 | 32.32 | 6        | F6:1542 | OB5946 H2 Ro.raw | 3.3444E6           | 3        | 3                      | 457   | 465 |                                                                                           |                                                                                                             | PEAKS DB  |
| N.GIEETIC(+57.02)TASVKK.N                     | N    | 84.54  | 1434.7388 | 13     | 0.2  | 718.3768 | 2 | 28.07 | 4        | F4:1177 | OB5922 H2 Ro.raw | 2.0536E5           | 4        | 4                      | 353   | 365 | Carbamidomethylation                                                                      | C7:Carbamidomethylation:1000.00                                                                             | PEAKS DB  |
| R.W(+31.99)LGLSAEYGNLYR.N                     | N    | 77.74  | 1572.7572 | 13     | -1.6 | 787.3846 | 2 | 33.64 | 6        | F6:1624 | OB5946 H2 Ro.raw | 8.5976E4           | 2        | 2                      | 396   | 408 | Dihydroxy                                                                                 | W1:Dihydroxy:62.93                                                                                          | PEAKS PTM |
| R.S(+57.02)PDIYNPQAGSLKTANDLNLILR.W           | N    | 75.36  | 2682.4341 | 24     | 1.5  | 895.1533 | 3 | 35.28 | 5        | F5:1735 | OB5945 H2 Ro.raw | 9.5441E4           | 1        | 1                      | 372   | 395 |                                                                                           | S1:Carbamidomethylation (DHKE, X @N-term):14.04                                                             | PEAKS PTM |
| R.AHVQVVDSN(+.98)GNRVYDEELQEGHVLVVPQNFAVAGK.S | N    | 75.25  | 3817.9023 | 35     | 5.0  | 955.4877 | 4 | 33.04 | 4        | F4:1438 | OB5922 H2 Ro.raw | 1.3721E6           | 1        | 1                      | 431   | 465 |                                                                                           | N9:Deamidation (NQ):4.64                                                                                    | PEAKS DB  |
| R.AHVQVVDSNGN(+.98)RVYDEELQEGHVLVVPQNFAVAGK.S | N    | 68.98  | 3817.9023 | 35     | 3.2  | 955.4859 | 4 | 32.51 | 5        | F5:1567 | OB5945 H2 Ro.raw | 0                  | 0        | 0                      | 431   | 465 |                                                                                           | N11:Deamidation (NQ):8.22                                                                                   | PEAKS DB  |
| R.Q(-17.03)LKNNNPFK.F                         | N    | 67.76  | 1084.5665 | 9      | 1.6  | 543.2914 | 2 | 28.75 | 5        | F5:1346 | OB5945 H2 Ro.raw | 1.0606E4           | 2        | 2                      | 515   | 523 | Pyro-glu from Q                                                                           | Q1:Pyro-glu from Q:1000.00                                                                                  | PEAKS PTM |
| R.W(+57.02)LGLSAEYGNLYR.N                     | N    | 65.45  | 1597.7888 | 13     | 0.6  | 799.9022 | 2 | 35.09 | 5        | F5:1725 | OB5945 H2 Ro.raw | 1.848E4            | 1        | 1                      | 396   | 408 | Carbamidomethylation (DHKE, X @N-term)                                                    | W1:Carbamidomethylation (DHKE, X @N-term):62.19                                                             | PEAKS PTM |
| R.WLGLSAE(+53.92)YGNLYR.N                     | N    | 65.30  | 1594.6866 | 13     | 1.3  | 532.5702 | 3 | 34.72 | 5        | F5:1698 | OB5945 H2 Ro.raw | 6.0447E5           | 3        | 3                      | 396   | 408 | Replacement of 2 protons by iron                                                          | E7:Replacement of 2 protons by iron:123.05                                                                  | PEAKS PTM |
| R.S(+57.02)PDIYNPQAGSLK.T                     | N    | 64.83  | 1445.7150 | 13     | 5.7  | 723.8689 | 2 | 28.94 | 5        | F5:1350 | OB5945 H2 Ro.raw | 6.4489E3           | 2        | 2                      | 372   | 384 |                                                                                           | S1:Carbamidomethylation (DHKE, X @N-term):14.04                                                             | PEAKS PTM |
| N.G(+41.03)IEETIC(+57.02)TASVK.K              | N    | 63.11  | 1347.6704 | 12     | 0.3  | 674.8427 | 2 | 29.12 | 5        | F5:1370 | OB5945 H2 Ro.raw | 1.5496E4           | 1        | 1                      | 353   | 364 | Amidination of lysines or N-terminal amines with methyl acetimidate; Carbamidomethylation | G1:Amidination of lysines or N-terminal amines with methyl acetimidate:96.48;C7:Carbamidomethylation:100.00 | PEAKS PTM |
| R.NALFVPHYNTNAHSIIYALRG.R                     | N    | 61.88  | 2370.2231 | 21     | 1.2  | 791.0826 | 3 | 33.77 | 5        | F5:1624 | OB5945 H2 Ro.raw | 4.2894E6           | 2        | 2                      | 409   | 429 |                                                                                           |                                                                                                             | PEAKS DB  |
| R.N(+57.02)ALFVPHYNTNAHSIIYALR.G              | N    | 59.27  | 2370.2231 | 20     | -0.1 | 791.0816 | 3 | 34.53 | 4        | F4:1557 | OB5922 H2 Ro.raw | 3.2966E6           | 1        | 1                      | 409   | 428 |                                                                                           | N1:Carbamidomethylation (DHKE, X @N-term):10.82                                                             | PEAKS PTM |
| R.SPD(+57.02)IYNPQAGSLK.T                     | N    | 55.35  | 1445.7150 | 13     | 2.2  | 723.8663 | 2 | 29.51 | 4        | F4:1244 | OB5922 H2 Ro.raw | 0                  | 0        | 0                      | 372   | 384 |                                                                                           | D3:Carbamidomethylation (DHKE, X @N-term):0.00                                                              | PEAKS PTM |

total 44 peptides



| Peptide                                          | Uniq | -10lgP | Mass      | Length | ppm  | m/z       | z | RT    | Fraction | Scan    | Source File      | Area Roast Ara h 2 | #Feature | #Feature Roast Ara h 2 | Start | End | PTM                              | AScore                                                                         | Found By  |
|--------------------------------------------------|------|--------|-----------|--------|------|-----------|---|-------|----------|---------|------------------|--------------------|----------|------------------------|-------|-----|----------------------------------|--------------------------------------------------------------------------------|-----------|
| R.AHVQVVDSENGNRVYDEELQ(+.98)EGHVLVVPQNFAVAGK.S   | N    | 53.98  | 3817.9023 | 35     | 7.9  | 955.4904  | 4 | 33.43 | 6        | F6:1615 | OB5946 H2 Ro.raw | 0                  | 0        | 0                      | 431   | 465 |                                  | Q19:Deamidation (NQ):4.91                                                      | PEAKS DB  |
| R.QLKNNNPFFKFFVPPSQSLGAV.A                       | Y    | 53.42  | 2459.2961 | 22     | 3.6  | 820.7756  | 3 | 33.50 | 4        | F4:1470 | OB5922 H2 Ro.raw | 5.0433E5           | 1        | 1                      | 515   | 536 |                                  |                                                                                | PEAKS DB  |
| K.SQSD(+53.92)NFEYVAFK.T                         | N    | 53.30  | 1487.5656 | 12     | -2.8 | 744.7880  | 2 | 32.03 | 4        | F4:1395 | OB5922 H2 Ro.raw | 0                  | 0        | 0                      | 466   | 477 |                                  | D4:Replacement of 2 protons by iron:20.50                                      | PEAKS PTM |
| K.NNNPFFKFFVPPSQS.L                              | N    | 52.69  | 1749.8474 | 15     | 1.0  | 875.9319  | 2 | 34.91 | 4        | F4:1573 | OB5922 H2 Ro.raw | 4.7342E4           | 1        | 1                      | 518   | 532 |                                  |                                                                                | PEAKS DB  |
| R.QLKNNNPFFKFFVPPSQS.L                           | N    | 51.09  | 2119.0850 | 18     | 1.9  | 707.3703  | 3 | 33.27 | 6        | F6:1604 | OB5946 H2 Ro.raw | 6.7737E4           | 1        | 1                      | 515   | 532 |                                  |                                                                                | PEAKS DB  |
| K.TAND(+53.92)LNLLILR.W                          | N    | 50.78  | 1308.6488 | 11     | 0.2  | 655.3318  | 2 | 35.09 | 4        | F4:1584 | OB5922 H2 Ro.raw | 8.7715E4           | 1        | 1                      | 385   | 395 | Replacement of 2 protons by iron | D4:Replacement of 2 protons by iron:55.73                                      | PEAKS PTM |
| R.LNAQRPDNRLESEGGYIETWPNPNQEFEC(+57.02)AGVALSR.L | N    | 50.20  | 4133.9248 | 36     | 7.4  | 1034.4961 | 4 | 33.23 | 4        | F4:1476 | OB5922 H2 Ro.raw | 5.4856E4           | 1        | 1                      | 37    | 72  | Carbamidomethylation             | C29:Carbamidomethylation:1000.00                                               | PEAKS DB  |
| R.NALFVPH(+57.02)YNTNAHSIIYALR.G                 | N    | 49.15  | 2370.2231 | 20     | 0.1  | 791.0817  | 3 | 34.03 | 6        | F6:1601 | OB5946 H2 Ro.raw | 8.9747E5           | 1        | 1                      | 409   | 428 |                                  | H7:Carbamidomethylation (DHKE, X@N-term):20.35                                 | PEAKS PTM |
| K.SQSDNFEYVAFKTDSPSIANLAGENSIIDNLPEEVVANSYGLPR.E | Y    | 48.98  | 4926.3945 | 45     | -0.7 | 1232.6051 | 4 | 37.16 | 5        | F5:1856 | OB5945 H2 Ro.raw | 4.0502E6           | 2        | 2                      | 466   | 510 |                                  |                                                                                | PEAKS DB  |
| R.WLGLSAEYGN(+.98)LYR.N                          | N    | 47.40  | 1541.7513 | 13     | 5.4  | 771.8871  | 2 | 54.24 | 4        | F4:2679 | OB5922 H2 Ro.raw | 0                  | 0        | 0                      | 396   | 408 | Deamidation (NQ)                 | N10:Deamidation (NQ):1000.00                                                   | PEAKS DB  |
| R.NALFVPHYNTNAHSIIYALRGR.A                       | N    | 46.11  | 2526.3245 | 22     | 0.6  | 843.1160  | 3 | 33.60 | 4        | F4:1492 | OB5922 H2 Ro.raw | 7.6168E5           | 2        | 2                      | 409   | 430 |                                  |                                                                                | PEAKS DB  |
| K.TDSRPSIANLAGENSIIDNLPEEVVAN(+.98)SYGLPR.E      | Y    | 42.62  | 3511.7429 | 33     | 5.1  | 1171.5942 | 3 | 46.13 | 5        | F5:2348 | OB5945 H2 Ro.raw | 4.9547E4           | 2        | 2                      | 478   | 510 |                                  | N27:Deamidation (NQ):43.76                                                     | PEAKS DB  |
| N.G(+57.02)IETIC(+57.02)TASVKK.N                 | N    | 41.72  | 1491.7603 | 13     | 2.0  | 746.8889  | 2 | 28.52 | 4        | F4:1178 | OB5922 H2 Ro.raw | 9.4457E3           | 1        | 1                      | 353   | 365 | Carbamidomethylation             | G1:Carbamidomethylation (DHKE, X@N-term):12.81;C7:Carbamidomethylation:1000.00 | PEAKS PTM |
| K.TDSRPSIANLAGEN(+.98)SIIDNLPEEVVANSYGLPR.E      | Y    | 40.49  | 3511.7429 | 33     | 8.6  | 1171.5983 | 3 | 48.17 | 4        | F4:2321 | OB5922 H2 Ro.raw | 2.3111E4           | 2        | 2                      | 478   | 510 |                                  | N14:Deamidation (NQ):5.79                                                      | PEAKS DB  |
| R.N(+.98)ALFVPHYNTNAHSIIYALR.G                   | N    | 38.37  | 2314.1858 | 20     | 7.3  | 772.4082  | 3 | 50.66 | 4        | F4:2450 | OB5922 H2 Ro.raw | 1.0573E4           | 1        | 1                      | 409   | 428 |                                  | N1:Deamidation (NQ):32.94                                                      | PEAKS DB  |
| R.WLGLSAE(+21.98)YGNLYR.N                        | N    | 36.57  | 1562.7494 | 13     | -8.4 | 782.3754  | 2 | 35.27 | 4        | F4:1583 | OB5922 H2 Ro.raw | 5.0047E4           | 2        | 2                      | 396   | 408 |                                  | E7:Sodium adduct:42.78                                                         | PEAKS PTM |
| K.TDSRPSIANLAGENSIIDNLPEEVVANSYGLPREQAR.Q        | Y    | 35.32  | 3994.9983 | 37     | 2.4  | 999.7593  | 4 | 35.84 | 5        | F5:1758 | OB5945 H2 Ro.raw | 5.332E5            | 1        | 1                      | 478   | 514 |                                  |                                                                                | PEAKS DB  |
| total 44 peptides                                |      |        |           |        |      |           |   |       |          |         |                  |                    |          |                        |       |     |                                  |                                                                                |           |

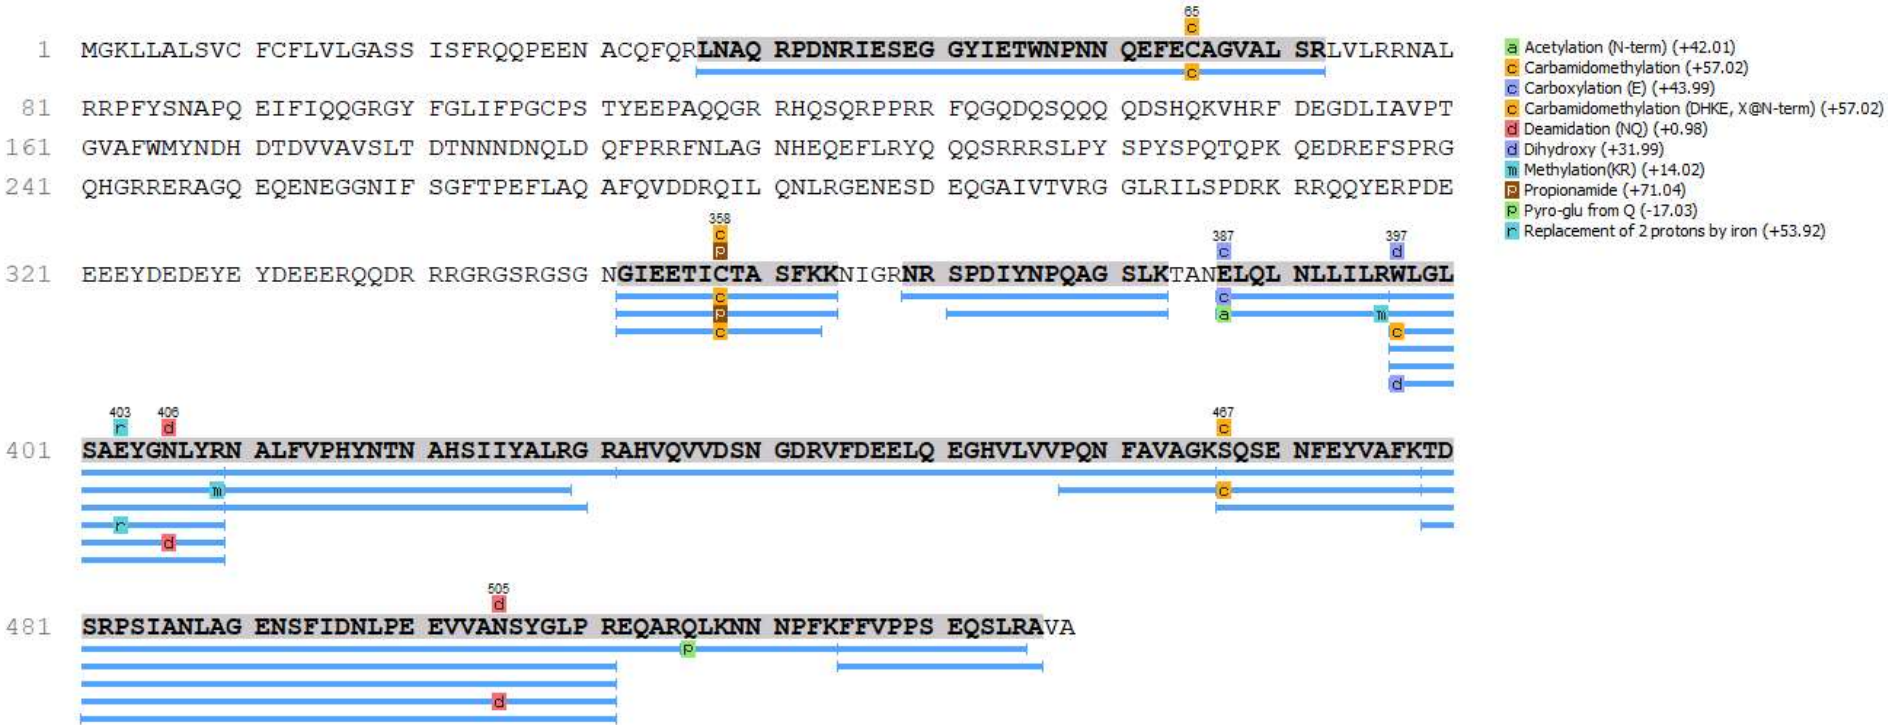

Supporting Peptides:

| Peptide                                    | Uniq | -10lgP | Mass      | Length | ppm | m/z       | z | RT    | Fraction | Scan    | Source File      | Area Roast Ara h 2 | #Feature | #Feature Roast Ara h 2 | Start | End | PTM                  | AScore                          | Found By |
|--------------------------------------------|------|--------|-----------|--------|-----|-----------|---|-------|----------|---------|------------------|--------------------|----------|------------------------|-------|-----|----------------------|---------------------------------|----------|
| R.NALFVPHYNTNAHSIIYALR,G                   | N    | 151.62 | 2313.2019 | 20     | 3.7 | 1157.6125 | 2 | 33.79 | 4        | F4:1486 | OB5922 H2 Ro.raw | 4.79E7             | 11       | 11                     | 410   | 429 |                      |                                 | PEAKS DB |
| R.WLGLSAEYGNLYR,N                          | N    | 145.22 | 1540.7673 | 13     | 3.5 | 771.3937  | 2 | 36.40 | 4        | F4:1654 | OB5922 H2 Ro.raw | 5.6282E7           | 22       | 22                     | 397   | 409 |                      |                                 | PEAKS DB |
| K.TDSRPSIANLAGENSFIDNLPEEVVANSYGLPR,E      | N    | 142.57 | 3544.7434 | 33     | 4.7 | 1182.5940 | 3 | 38.01 | 6        | F6:1881 | OB5946 H2 Ro.raw | 5.7129E7           | 11       | 11                     | 479   | 511 |                      |                                 | PEAKS DB |
| K.SQSENFYVAFK,T                            | N    | 130.69 | 1447.6619 | 12     | 2.8 | 724.8402  | 2 | 31.92 | 4        | F4:1368 | OB5922 H2 Ro.raw | 1.7167E7           | 4        | 4                      | 467   | 478 |                      |                                 | PEAKS DB |
| K.TDSRPSIANLAGENSFIDNLPEEVAN(+.98)SYGLPR,E | N    | 112.33 | 3545.7273 | 33     | 1.8 | 1182.9185 | 3 | 36.63 | 5        | F5:1807 | OB5945 H2 Ro.raw | 0                  | 0        | 0                      | 479   | 511 | Deamidation (NQ)     | N27:Deamidation (NQ):103.10     | PEAKS DB |
| N.GIEETIC(+57.02)TASFKK,N                  | N    | 110.54 | 1482.7388 | 13     | 0.4 | 742.3770  | 2 | 29.26 | 6        | F6:1358 | OB5946 H2 Ro.raw | 7.064E5            | 3        | 3                      | 352   | 364 | Carbamidomethylation | C7:Carbamidomethylation:1000.00 | PEAKS DB |
| R.AHVQVDSNGDRVFDEELQEGHVLVVPQNFAVAGK,S     | N    | 107.17 | 3801.9075 | 35     | 3.6 | 1268.3143 | 3 | 33.20 | 5        | F5:1608 | OB5945 H2 Ro.raw | 1.4284E6           | 3        | 3                      | 432   | 466 |                      |                                 | PEAKS DB |
| N.GIEETIC(+57.02)TASFK,K                   | N    | 100.90 | 1354.6438 | 12     | 2.0 | 678.3305  | 2 | 31.03 | 6        | F6:1474 | OB5946 H2 Ro.raw | 5.4233E4           | 3        | 3                      | 352   | 363 | Carbamidomethylation | C7:Carbamidomethylation:1000.00 | PEAKS DB |

total 43 peptides



| Peptide                          | Uniq | -10lgP | Mass      | Length | ppm  | m/z      | z | RT    | Fraction | Scan    | Source File      | Area Roast Ara h 2 | #Feature | #Feature Roast Ara h 2 | Start | End | PTM                                   | AScore                                          | Found By  |
|----------------------------------|------|--------|-----------|--------|------|----------|---|-------|----------|---------|------------------|--------------------|----------|------------------------|-------|-----|---------------------------------------|-------------------------------------------------|-----------|
| K.FFVPPSEQLRA.V                  | N    | 99.04  | 1376.7087 | 12     | 2.6  | 689.3635 | 2 | 31.58 | 6        | F6:1497 | OB5946 H2 Ro.raw | 2.1983E6           | 3        | 3                      | 525   | 536 |                                       |                                                 | PEAKS DB  |
| R.SPDIYNPQAGSLK.T                | N    | 95.77  | 1388.6936 | 13     | 1.7  | 695.3552 | 2 | 28.58 | 5        | F5:1323 | OB5945 H2 Ro.raw | 5.949E5            | 3        | 3                      | 371   | 383 |                                       |                                                 | PEAKS DB  |
| R.NALFVPH(+14.02)YNTNAHSIIYALR.G | N    | 93.74  | 2327.2175 | 20     | 0.7  | 776.7470 | 3 | 34.91 | 4        | F4:1561 | OB5922 H2 Ro.raw | 1.3103E6           | 3        | 3                      | 410   | 429 |                                       | H7:Methylation(others): 22.45                   | PEAKS PTM |
| R.NRSPDIYNPQAGSLK.T              | N    | 91.67  | 1658.8376 | 15     | 0.8  | 830.4268 | 2 | 28.33 | 6        | F6:1298 | OB5946 H2 Ro.raw | 4.0221E5           | 6        | 6                      | 369   | 383 |                                       |                                                 | PEAKS DB  |
| K.FFVPPSEQLR.A                   | N    | 90.90  | 1305.6716 | 11     | 0.4  | 653.8433 | 2 | 30.78 | 5        | F5:1466 | OB5945 H2 Ro.raw | 4.1482E5           | 3        | 3                      | 525   | 535 |                                       |                                                 | PEAKS DB  |
| V.PQNFAVAGK.S                    | N    | 85.45  | 930.4923  | 9      | 1.0  | 466.2539 | 2 | 32.32 | 6        | F6:1542 | OB5946 H2 Ro.raw | 3.3444E6           | 3        | 3                      | 458   | 466 |                                       |                                                 | PEAKS DB  |
| R.W(+31.99)LGLSAEYGNLYR.N        | N    | 77.74  | 1572.7572 | 13     | -1.6 | 787.3846 | 2 | 33.64 | 6        | F6:1624 | OB5946 H2 Ro.raw | 8.5976E4           | 2        | 2                      | 397   | 409 | Dihydroxy                             | W1:Dihydroxy:62.93                              | PEAKS PTM |
| K.S(+57.02)QSENFYVAFK.T          | N    | 77.12  | 1504.6833 | 12     | 0.0  | 753.3489 | 2 | 31.77 | 6        | F6:1521 | OB5946 H2 Ro.raw | 4.3047E5           | 3        | 3                      | 467   | 478 | Carbamidomethylation (DHKE, X@N-term) | S1:Carbamidomethylation (DHKE, X@N-term): 56.34 | PEAKS PTM |
| R.Q(-17.03)LKNNNPFK.F            | N    | 67.76  | 1084.5665 | 9      | 1.6  | 543.2914 | 2 | 28.75 | 5        | F5:1346 | OB5945 H2 Ro.raw | 1.0606E4           | 2        | 2                      | 516   | 524 | Pyro-glu from Q                       | Q1:Pyro-glu from Q:100.0.0                      | PEAKS PTM |
| R.W(+57.02)LGLSAEYGNLYR.N        | N    | 65.45  | 1597.7888 | 13     | 0.6  | 799.9022 | 2 | 35.09 | 5        | F5:1725 | OB5945 H2 Ro.raw | 1.848E4            | 1        | 1                      | 397   | 409 | Carbamidomethylation (DHKE, X@N-term) | W1:Carbamidomethylation (DHKE, X@N-term): 62.19 | PEAKS PTM |
| R.WLGLSAE(+53.92)YGNLYR.N        | N    | 65.30  | 1594.6866 | 13     | 1.3  | 532.5702 | 3 | 34.72 | 5        | F5:1698 | OB5945 H2 Ro.raw | 6.0447E5           | 3        | 3                      | 397   | 409 | Replacement of 2 protons by iron      | E7:Replacement of 2 protons by iron:123.05      | PEAKS PTM |
| R.S(+57.02)PDIYNPQAGSLK.T        | N    | 64.83  | 1445.7150 | 13     | 5.7  | 723.8689 | 2 | 28.94 | 5        | F5:1350 | OB5945 H2 Ro.raw | 6.4489E3           | 2        | 2                      | 371   | 383 |                                       | S1:Carbamidomethylation (DHKE, X@N-term): 14.04 | PEAKS PTM |
| R.NALFVPHYNTNAHSIIYALRG.R        | N    | 61.88  | 2370.2231 | 21     | 1.2  | 791.0826 | 3 | 33.77 | 5        | F5:1624 | OB5945 H2 Ro.raw | 4.2894E6           | 2        | 2                      | 410   | 430 |                                       |                                                 | PEAKS DB  |
| K.SQSE(+21.98)NFEYVAFK.T         | N    | 60.96  | 1469.6438 | 12     | -0.6 | 735.8287 | 2 | 31.51 | 5        | F5:1513 | OB5945 H2 Ro.raw | 2.7649E4           | 1        | 1                      | 467   | 478 |                                       | E4:Sodium adduct:0.00                           | PEAKS PTM |
| K.SQSENF(+21.98)YVAFK.T          | N    | 59.61  | 1469.6438 | 12     | -1.1 | 735.8284 | 2 | 31.92 | 4        | F4:1388 | OB5922 H2 Ro.raw | 4.36E4             | 1        | 1                      | 467   | 478 |                                       | E7:Sodium adduct:14.84                          | PEAKS PTM |
| R.N(+57.02)ALFVPHYNTNAHSIIYALR.G | N    | 59.27  | 2370.2231 | 20     | -0.1 | 791.0816 | 3 | 34.53 | 4        | F4:1557 | OB5922 H2 Ro.raw | 3.2966E6           | 1        | 1                      | 410   | 429 |                                       | N1:Carbamidomethylation (DHKE, X@N-term): 10.82 | PEAKS PTM |
| K.SQSE(+53.92)NFEYVAFK.T         | N    | 58.53  | 1501.5812 | 12     | -2.3 | 751.7961 | 2 | 31.58 | 6        | F6:1507 | OB5946 H2 Ro.raw | 9.4575E4           | 1        | 1                      | 467   | 478 |                                       | E4:Replacement of 2 protons by iron:34.87       | PEAKS PTM |

total 43 peptides

| Peptide                                                | Uniq | -10lgP | Mass      | Length | ppm  | m/z       | z | RT    | Fraction | Scan    | Source File      | Area Roast Ara h 2 | #Feature | #Feature Roast Ara h 2 | Start | End | PTM                                   | AScore                                                                                  | Found By  |
|--------------------------------------------------------|------|--------|-----------|--------|------|-----------|---|-------|----------|---------|------------------|--------------------|----------|------------------------|-------|-----|---------------------------------------|-----------------------------------------------------------------------------------------|-----------|
| K.TDSRPSIANLAGENSFIDNLPEEVVANSYGLPREQAR.Q              | N    | 58.03  | 4028.9827 | 37     | 2.2  | 1008.2552 | 4 | 36.41 | 5        | F5:1777 | OB5945 H2 Ro.raw | 1.9797E6           | 2        | 2                      | 479   | 515 |                                       |                                                                                         | PEAKS DB  |
| K.TDSRPSIANLAGENSFIDN(+.98)LPPEEVVANSYGLPR.E           | N    | 57.24  | 3545.7273 | 33     | 5.5  | 1182.9229 | 3 | 37.60 | 4        | F4:1724 | OB5922 H2 Ro.raw | 0                  | 0        | 0                      | 479   | 511 |                                       | N19:Deamidation (NQ):20.10                                                              | PEAKS DB  |
| R.SPD(+57.02)IYNPQAGSLK.T                              | N    | 55.35  | 1445.7150 | 13     | 2.2  | 723.8663  | 2 | 29.51 | 4        | F4:1244 | OB5922 H2 Ro.raw | 0                  | 0        | 0                      | 371   | 383 |                                       | D3:Carbamidomethylation (DHKE, X@N-term):0.00                                           | PEAKS PTM |
| K.SQSENFYVAFKTDSPSIANLAGENSFIDNLPEEVVANSYGLPR.E        | N    | 54.99  | 4974.3945 | 45     | 2.5  | 1244.6090 | 4 | 38.26 | 4        | F4:1777 | OB5922 H2 Ro.raw | 3.3359E6           | 3        | 3                      | 467   | 511 |                                       |                                                                                         | PEAKS DB  |
| K.SQS(-18.01)ENFEYVAFK.T                               | N    | 52.68  | 1429.6514 | 12     | 1.9  | 715.8344  | 2 | 31.92 | 4        | F4:1380 | OB5922 H2 Ro.raw | 3.0777E4           | 1        | 1                      | 467   | 478 |                                       | S3:Dehydration:14.04                                                                    | PEAKS PTM |
| R.LNAQRPDNRIESEGGYIETWPNNNQEFEC(+57.02)AGVALSR.L       | N    | 50.20  | 4133.9248 | 36     | 7.4  | 1034.4961 | 4 | 33.23 | 4        | F4:1476 | OB5922 H2 Ro.raw | 5.4856E4           | 1        | 1                      | 37    | 72  | Carbamidomethylation                  | C29:Carbamidomethylation:1000.00                                                        | PEAKS DB  |
| R.NALFVPH(+57.02)YNTNAHSIIYALR.G                       | N    | 49.15  | 2370.2231 | 20     | 0.1  | 791.0817  | 3 | 34.03 | 6        | F6:1601 | OB5946 H2 Ro.raw | 8.9747E5           | 1        | 1                      | 410   | 429 |                                       | H7:Carbamidomethylation (DHKE, X@N-term):20.35                                          | PEAKS PTM |
| N.GIEETIC(+71.04)TASFKK.N                              | N    | 48.49  | 1496.7544 | 13     | 0.4  | 749.3848  | 2 | 29.91 | 4        | F4:1267 | OB5922 H2 Ro.raw | 6.4028E4           | 3        | 3                      | 352   | 364 | Propionamide                          | C7:Propionamide:1000.00                                                                 | PEAKS PTM |
| D.SRPSIANLAGENSFIDNLPEEVVANSYGLPR.E                    | N    | 48.34  | 3328.6687 | 31     | 3.9  | 1110.5679 | 3 | 37.36 | 5        | F5:1841 | OB5945 H2 Ro.raw | 3.0619E5           | 2        | 2                      | 481   | 511 |                                       |                                                                                         | PEAKS DB  |
| K.TDSRPSIANLAGEN(+.98)SFIDNLPEEVVANSYGLPR.E            | N    | 47.42  | 3545.7273 | 33     | 9.2  | 1182.9272 | 3 | 48.53 | 5        | F5:2493 | OB5945 H2 Ro.raw | 0                  | 0        | 0                      | 479   | 511 |                                       | N14:Deamidation (NQ):19.39                                                              | PEAKS DB  |
| R.WLGLSAEYGN(+.98)LYR.N                                | N    | 47.40  | 1541.7513 | 13     | 5.4  | 771.8871  | 2 | 54.24 | 4        | F4:2679 | OB5922 H2 Ro.raw | 0                  | 0        | 0                      | 397   | 409 | Deamidation (NQ)                      | N10:Deamidation (NQ):1000.00                                                            | PEAKS DB  |
| R.NALFVPHYNTNAHSIIYALRGR.A                             | N    | 46.11  | 2526.3245 | 22     | 0.6  | 843.1160  | 3 | 33.60 | 4        | F4:1492 | OB5922 H2 Ro.raw | 7.6168E5           | 2        | 2                      | 410   | 431 |                                       |                                                                                         | PEAKS DB  |
| K.SQSEN(+.98)FEYVAFKTDSPSIANLAGENSFIDNLPEEVVANSYGLPR.E | N    | 45.32  | 4975.3789 | 45     | 2.8  | 1244.8555 | 4 | 39.75 | 5        | F5:1987 | OB5945 H2 Ro.raw | 0                  | 0        | 0                      | 467   | 511 |                                       | N5:Deamidation (NQ):0.00                                                                | PEAKS DB  |
| N.G(+57.02)IETIC(+57.02)TASFKK.N                       | N    | 43.30  | 1539.7603 | 13     | -0.3 | 770.8872  | 2 | 30.37 | 4        | F4:1296 | OB5922 H2 Ro.raw | 0                  | 0        | 0                      | 352   | 364 | Carbamidomethylation                  | G1:Carbamidomethylation (DHKE, X@N-term):14.04;C7:Carbamidomethylation:1000.00          | PEAKS PTM |
| N.E(+42.01)LQLNLLILR(+14.02)WLGLSAEYGNLYR(+14.02).N    | Y    | 42.71  | 2816.5588 | 23     | -7.9 | 939.8528  | 3 | 40.93 | 4        | F4:1919 | OB5922 H2 Ro.raw | 2.7383E5           | 1        | 1                      | 387   | 409 | Acetylation (N-term); Methylation(KR) | E1:Acetylation (N-term):1000.00;R10:Methylation(KR):1000.00;R23:Methylation(KR):1000.00 | PEAKS PTM |

total 43 peptides

| Peptide                        | Uniq | -10lgP | Mass      | Length | ppm  | m/z      | z | RT    | Fraction | Scan    | Source File      | Area Roast Ara h 2 | #Feature | #Feature Roast Ara h 2 | Start | End | PTM               | AScore                                                 | Found By  |
|--------------------------------|------|--------|-----------|--------|------|----------|---|-------|----------|---------|------------------|--------------------|----------|------------------------|-------|-----|-------------------|--------------------------------------------------------|-----------|
| N,E(+43.99)LQ(+.98)LNLLILR,W   | Y    | 39.76  | 1268.7340 | 10     | -1.9 | 635.3730 | 2 | 40.91 | 4        | F4:1916 | OB5922 H2 Ro.raw | 0                  | 0        | 0                      | 387   | 396 | Carboxylation (E) | E1:Carboxylation (E):1000.00;Q3:Deamidation (NQ):44.72 | PEAKS PTM |
| R,N(+.98)ALFVPHYNTNAHSIIYALR,G | N    | 38.37  | 2314.1858 | 20     | 7.3  | 772.4082 | 3 | 50.66 | 4        | F4:2450 | OB5922 H2 Ro.raw | 1.0573E4           | 1        | 1                      | 410   | 429 |                   | N1:Deamidation (NQ):32.94                              | PEAKS DB  |
| R,WLGLSAE(+21.98)YGNLYR,N      | N    | 36.57  | 1562.7494 | 13     | -8.4 | 782.3754 | 2 | 35.27 | 4        | F4:1583 | OB5922 H2 Ro.raw | 5.0047E4           | 2        | 2                      | 397   | 409 |                   | E7:Sodium adduct:42.78                                 | PEAKS PTM |
| total 43 peptides              |      |        |           |        |      |          |   |       |          |         |                  |                    |          |                        |       |     |                   |                                                        |           |

E9LFE8|E9LFE8\_ARAHY

[back to list](#)

[Protein Coverage](#) | [Supporting Peptides](#) |

Protein Coverage:

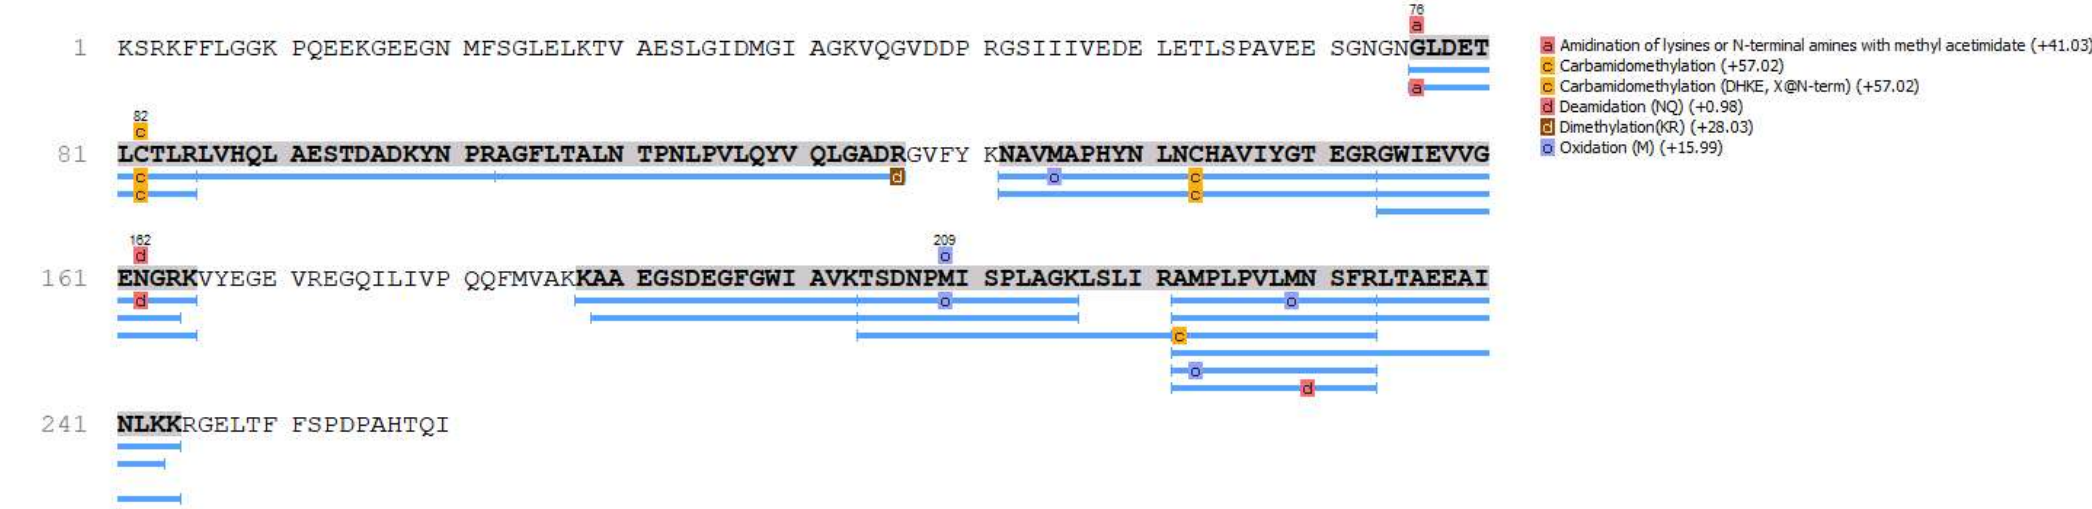

Supporting Peptides:

| Peptide                              | Uniq | -10lgP | Mass      | Length | ppm | m/z       | z | RT    | Fraction | Scan    | Source File      | Area Roast Ara h 2 | #Feature | #Feature Roast Ara h 2 | Start | End | PTM               | AScore                        | Found By  |
|--------------------------------------|------|--------|-----------|--------|-----|-----------|---|-------|----------|---------|------------------|--------------------|----------|------------------------|-------|-----|-------------------|-------------------------------|-----------|
| R,AGFLTALNTPNLPVLQYVQLGADR(+28.03),G | Y    | 151.29 | 2598.4170 | 24     | 4.1 | 1300.2211 | 2 | 40.36 | 4        | F4:1874 | OB5922 H2 Ro.raw | 8.4413E6           | 6        | 6                      | 103   | 126 | Dimethylation(KR) | R24:Dimethylation(KR):1000.00 | PEAKS PTM |
| K,KAAEGSDEGFGWIAVK,T                 | Y    | 146.19 | 1663.8206 | 16     | 2.8 | 832.9199  | 2 | 32.11 | 4        | F4:1402 | OB5922 H2 Ro.raw | 5.9962E5           | 5        | 5                      | 188   | 203 |                   |                               | PEAKS DB  |
| K,AAEGSDEGFGWIAVK.T                  | Y    | 137.31 | 1535.7256 | 15     | 2.4 | 768.8719  | 2 | 33.64 | 6        | F6:1628 | OB5946 H2 Ro.raw | 4.1039E6           | 3        | 3                      | 189   | 203 |                   |                               | PEAKS DB  |
| R,AMPLPVLNMSFR,L                     | Y    | 122.04 | 1374.7152 | 12     | 2.5 | 688.3666  | 2 | 36.76 | 4        | F4:1666 | OB5922 H2 Ro.raw | 4.2211E6           | 4        | 4                      | 222   | 233 |                   |                               | PEAKS DB  |
| total 26 peptides                    |      |        |           |        |     |           |   |       |          |         |                  |                    |          |                        |       |     |                   |                               |           |

| Peptide                                    | Uniq | -10lgP | Mass      | Length | ppm  | m/z      | z | RT    | Fraction | Scan    | Source File      | Area Roast Ara h 2 | #Feature | #Feature Roast Ara h 2 | Start | End | PTM                                   | AScore                                                                                                       | Found By  |
|--------------------------------------------|------|--------|-----------|--------|------|----------|---|-------|----------|---------|------------------|--------------------|----------|------------------------|-------|-----|---------------------------------------|--------------------------------------------------------------------------------------------------------------|-----------|
| R.AMPLPVLN(+15.99)NSFR.L                   | Y    | 113.73 | 1390.7101 | 12     | 2.1  | 696.3638 | 2 | 34.40 | 4        | F4:1535 | OB5922 H2 Ro.raw | 4.0273E5           | 1        | 1                      | 222   | 233 | Oxidation (M)                         | M8:Oxidation (M):146.62                                                                                      | PEAKS DB  |
| K.TSDNPMISPLAGK.L                          | Y    | 113.60 | 1329.6598 | 13     | 0.5  | 665.8375 | 2 | 29.91 | 6        | F6:1397 | OB5946 H2 Ro.raw | 4.6371E5           | 3        | 3                      | 204   | 216 |                                       |                                                                                                              | PEAKS DB  |
| R.GWIEVVGNGR.K                             | Y    | 109.17 | 1214.6044 | 11     | 0.0  | 608.3094 | 2 | 31.76 | 6        | F6:1523 | OB5946 H2 Ro.raw | 6.5203E4           | 2        | 2                      | 154   | 164 |                                       |                                                                                                              | PEAKS DB  |
| K.NAVMAPHYNLNC(+57.02)HAVIYGTEGR.G         | Y    | 98.11  | 2486.1582 | 22     | 1.2  | 829.7277 | 3 | 31.22 | 6        | F6:1485 | OB5946 H2 Ro.raw | 3.5159E5           | 2        | 2                      | 132   | 153 | Carbamidomethylation                  | C12:Carbamidomethylation:1000.00                                                                             | PEAKS DB  |
| K.TSDNPMISPLAGKLSLIR.A                     | Y    | 95.78  | 1912.0452 | 18     | -0.1 | 638.3556 | 3 | 34.16 | 4        | F4:1525 | OB5922 H2 Ro.raw | 1.9762E5           | 2        | 2                      | 204   | 221 |                                       |                                                                                                              | PEAKS DB  |
| N.GLDETLN(+57.02)TLR.L                     | Y    | 92.72  | 1176.5808 | 10     | 0.9  | 589.2982 | 2 | 30.78 | 5        | F5:1456 | OB5945 H2 Ro.raw | 4.2059E5           | 3        | 3                      | 76    | 85  | Carbamidomethylation                  | C7:Carbamidomethylation:1000.00                                                                              | PEAKS DB  |
| K.TSDNPM(+15.99)ISPLAGK.L                  | Y    | 91.04  | 1345.6548 | 13     | -1.0 | 673.8340 | 2 | 28.04 | 4        | F4:1158 | OB5922 H2 Ro.raw | 8.6931E3           | 3        | 3                      | 204   | 216 | Oxidation (M)                         | M6:Oxidation (M):1000.00                                                                                     | PEAKS DB  |
| R.LTAEAEINLK.K                             | Y    | 83.63  | 1100.6077 | 10     | 1.8  | 551.3121 | 2 | 29.67 | 5        | F5:1400 | OB5945 H2 Ro.raw | 2.6983E4           | 3        | 3                      | 234   | 243 |                                       |                                                                                                              | PEAKS DB  |
| K.A(+57.02)AEGSDEGFGWIAVK.T                | Y    | 80.99  | 1592.7471 | 15     | 1.2  | 797.3818 | 2 | 33.97 | 4        | F4:1507 | OB5922 H2 Ro.raw | 2.9688E4           | 1        | 1                      | 189   | 203 |                                       | A1:Carbamidomethylation (DHKE, X@N-term):11.10                                                               | PEAKS PTM |
| N.G(+57.02)LDETLN(+57.02)TLR.L             | Y    | 78.72  | 1233.6023 | 10     | 2.6  | 617.8100 | 2 | 30.88 | 5        | F5:1470 | OB5945 H2 Ro.raw | 0                  | 0        | 0                      | 76    | 85  | Carbamidomethylation                  | G1:Carbamidomethylation (DHKE, X@N-term):26.31; C7:Carbamidomethylation:1000.00                              | PEAKS PTM |
| R.GWIEVVGNG(+.98)GRK.V                     | Y    | 74.66  | 1343.6833 | 12     | 0.3  | 672.8492 | 2 | 30.41 | 5        | F5:1444 | OB5945 H2 Ro.raw | 1.4478E4           | 1        | 1                      | 154   | 165 | Deamidation (NQ)                      | N9:Deamidation (NQ):1000.00                                                                                  | PEAKS DB  |
| R.GWIEVVGNGR.K                             | Y    | 73.34  | 1342.6993 | 12     | 0.6  | 672.3574 | 2 | 30.50 | 6        | F6:1442 | OB5946 H2 Ro.raw | 0                  | 0        | 0                      | 154   | 165 |                                       |                                                                                                              | PEAKS DB  |
| R.A(+57.02)MPLPVLNNSFR.L                   | Y    | 73.22  | 1431.7367 | 12     | 1.5  | 716.8767 | 2 | 36.95 | 4        | F4:1692 | OB5922 H2 Ro.raw | 1.0591E5           | 3        | 3                      | 222   | 233 | Carbamidomethylation (DHKE, X@N-term) | A1:Carbamidomethylation (DHKE, X@N-term):1000.00                                                             | PEAKS PTM |
| R.LVHQLAESTDADKYNPR.A                      | Y    | 72.60  | 1955.9701 | 17     | -6.1 | 978.9863 | 2 | 30.10 | 4        | F4:1292 | OB5922 H2 Ro.raw | 7.2507E4           | 3        | 3                      | 86    | 102 |                                       |                                                                                                              | PEAKS DB  |
| N.GLD(+14.02)ETLC(+57.02)TLR.L             | Y    | 70.01  | 1190.5966 | 10     | 3.1  | 596.3074 | 2 | 31.37 | 4        | F4:1347 | OB5922 H2 Ro.raw | 1.792E6            | 3        | 3                      | 76    | 85  | Carbamidomethylation                  | D3:Methylation(others):33.98;C7:Carbamidomethylation:1000.00                                                 | PEAKS PTM |
| K.NAVM(+15.99)APHYNLNC(+57.02)HAVIYGTEGR.G | Y    | 69.81  | 2502.1533 | 22     | 1.1  | 835.0593 | 3 | 30.66 | 6        | F6:1454 | OB5946 H2 Ro.raw | 9.2873E4           | 3        | 3                      | 132   | 153 | Oxidation (M); Carbamidomethylation   | M4:Oxidation (M):1000.00; C12:Carbamidomethylation:1000.00                                                   | PEAKS DB  |
| R.LTAEAEINLKK.R                            | Y    | 67.83  | 1228.7026 | 11     | 1.1  | 615.3593 | 2 | 28.04 | 4        | F4:1144 | OB5922 H2 Ro.raw | 4.2354E4           | 3        | 3                      | 234   | 244 |                                       |                                                                                                              | PEAKS DB  |
| N.G(+57.02)LD(+14.02)ETLC(+57.02)TLR.L     | Y    | 58.35  | 1247.6179 | 10     | 1.2  | 624.8170 | 2 | 31.22 | 6        | F6:1488 | OB5946 H2 Ro.raw | 4.2493E4           | 2        | 2                      | 76    | 85  | Carbamidomethylation                  | G1:Carbamidomethylation (DHKE, X@N-term):49.37; D3:Methylation(others):27.96;C7:Carbamidomethylation:1000.00 | PEAKS PTM |
| R.AMPLPVLN(+.98)SFR.L                      | Y    | 57.25  | 1375.6992 | 12     | 1.7  | 688.8580 | 2 | 36.11 | 4        | F4:1637 | OB5922 H2 Ro.raw | 0                  | 0        | 0                      | 222   | 233 | Deamidation (NQ)                      | N9:Deamidation (NQ):1000.00                                                                                  | PEAKS DB  |

total 26 peptides

sp|Q647H2|AHY3\_ARAHY

[back to list](#)

[| Protein Coverage](#)

[| Supporting Peptides](#)

Protein Coverage:

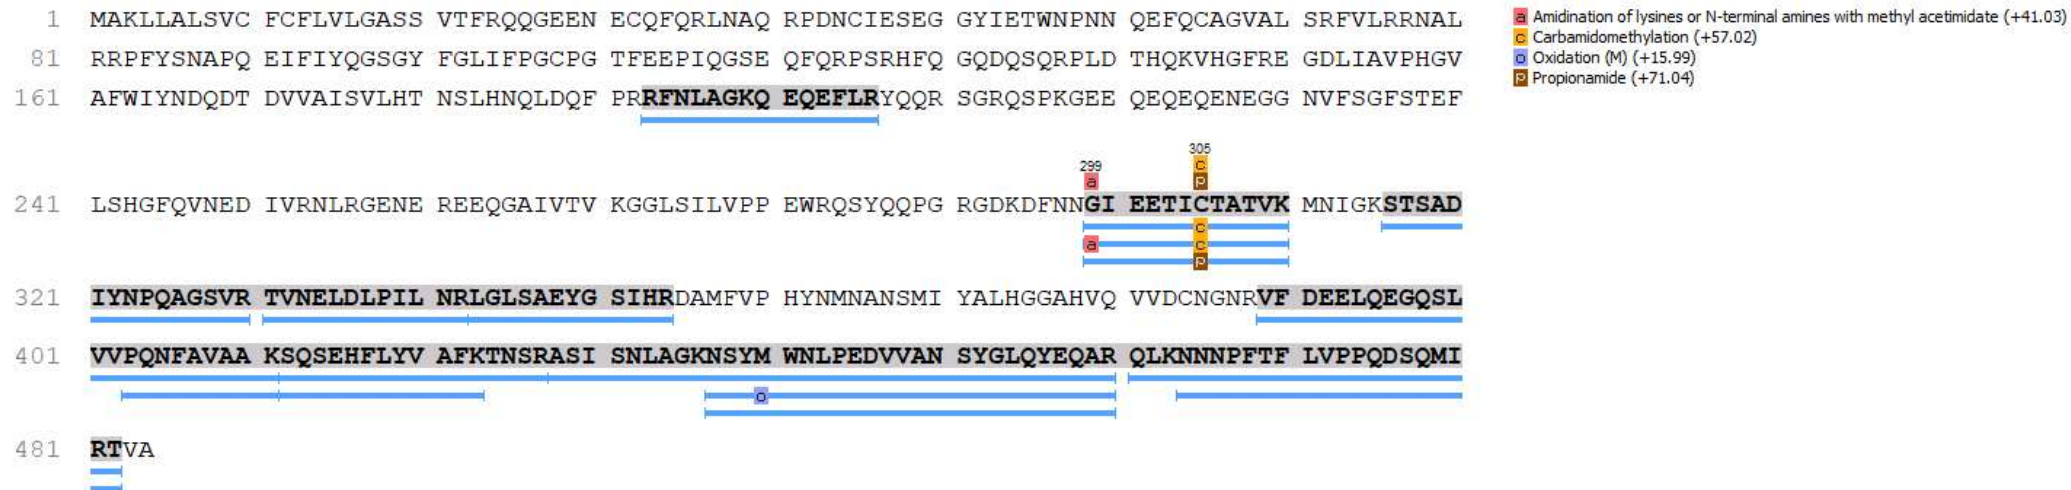

| Peptide                              | Uniq | -10lgP | Mass      | Length | ppm | m/z       | z | RT    | Fraction | Scan    | Source File      | Area Roast Ara h 2 | #Feature | #Feature Roast Ara h 2 | Start | End | PTM | AScore | Found By |
|--------------------------------------|------|--------|-----------|--------|-----|-----------|---|-------|----------|---------|------------------|--------------------|----------|------------------------|-------|-----|-----|--------|----------|
| K.NSYMWNLPEDVVANSYGLQYEQR.Q          | Y    | 139.65 | 2846.2969 | 24     | 3.2 | 1424.1603 | 2 | 37.32 | 4        | F4:1709 | OB5922 H2 Ro.raw | 9.5352E5           | 4        | 4                      | 437   | 460 |     |        | PEAKS DB |
| K.SQSEHFLYVAFK.T                     | Y    | 132.94 | 1454.7194 | 12     | 1.5 | 728.3680  | 2 | 32.30 | 4        | F4:1412 | OB5922 H2 Ro.raw | 2.2082E6           | 6        | 6                      | 412   | 423 |     |        | PEAKS DB |
| R.TVNELDLPILNR.L                     | Y    | 119.74 | 1395.7721 | 12     | 1.9 | 698.8947  | 2 | 34.41 | 6        | F6:1672 | OB5946 H2 Ro.raw | 4.4893E6           | 3        | 3                      | 331   | 342 |     |        | PEAKS DB |
| R.ASISNLAGKNSYMWNLPEDVVANSYGLQYEQR.Q | Y    | 115.74 | 3687.7627 | 33     | 7.0 | 1230.2701 | 3 | 36.76 | 4        | F4:1683 | OB5922 H2 Ro.raw | 3.0022E5           | 3        | 3                      | 428   | 460 |     |        | PEAKS DB |

**total 19 peptides**

| Peptide                               | Uniq | ~10lgP | Mass      | Length | ppm  | m/z       | z | RT    | Fraction | Scan    | Source File      | Area Roast Ara h 2 | #Feature | #Feature Roast Ara h 2 | Start | End | PTM                                                                                     | AScore                                                                                                     | Found By  |
|---------------------------------------|------|--------|-----------|--------|------|-----------|---|-------|----------|---------|------------------|--------------------|----------|------------------------|-------|-----|-----------------------------------------------------------------------------------------|------------------------------------------------------------------------------------------------------------|-----------|
| K.NSYM(+15.99)WNLPEDEVVANSYGLQYEQAR.Q | Y    | 114.80 | 2862.2917 | 24     | 4.0  | 1432.1589 | 2 | 36.20 | 4        | F4:1647 | OB5922 H2 Ro.raw | 5.9092E4           | 2        | 2                      | 437   | 460 | Oxidation (M)                                                                           | M4:Oxidation (M):1000.00                                                                                   | PEAKS DB  |
| R.LGLSAEYGSiHR.D                      | Y    | 112.58 | 1301.6727 | 12     | 0.5  | 651.8440  | 2 | 29.26 | 6        | F6:1369 | OB5946 H2 Ro.raw | 2.0752E5           | 6        | 6                      | 343   | 354 |                                                                                         |                                                                                                            | PEAKS DB  |
| K.SQSEHFLYVAFKtNSR.A                  | Y    | 109.97 | 1912.9431 | 16     | 1.0  | 638.6556  | 3 | 31.92 | 4        | F4:1392 | OB5922 H2 Ro.raw | 1.6409E5           | 3        | 3                      | 412   | 427 |                                                                                         |                                                                                                            | PEAKS DB  |
| N.GIEETIC(+57.02)TATVK.M              | N    | 109.07 | 1320.6595 | 12     | -0.2 | 661.3369  | 2 | 29.91 | 4        | F4:1260 | OB5922 H2 Ro.raw | 2.1822E5           | 3        | 3                      | 299   | 310 | Carbamidomethylation                                                                    | C7:Carbamidomethylation:1000.00                                                                            | PEAKS DB  |
| K.STSADIYNPQAGSVR.T                   | Y    | 83.45  | 1564.7482 | 15     | 2.2  | 783.3831  | 2 | 27.91 | 4        | F4:1134 | OB5922 H2 Ro.raw | 4.5802E4           | 3        | 3                      | 316   | 330 |                                                                                         |                                                                                                            | PEAKS DB  |
| R.VFDEELQEGQSLVVPQNFavaAK.S           | Y    | 78.21  | 2517.2751 | 23     | 4.7  | 1259.6508 | 2 | 35.09 | 5        | F5:1723 | OB5945 H2 Ro.raw | 7.46E4             | 3        | 3                      | 389   | 411 |                                                                                         |                                                                                                            | PEAKS DB  |
| N.G(+57.02)IEETIC(+57.02)TATVK.M      | N    | 70.02  | 1377.6809 | 12     | 2.0  | 689.8491  | 2 | 30.19 | 4        | F4:1285 | OB5922 H2 Ro.raw | 5.5841E3           | 1        | 1                      | 299   | 310 | Carbamidomethylation                                                                    | G1:Carbamidomethylation (DHKE, X@N-term):30.83;C7:Carbamidomethylation:1000.00                             | PEAKS PTM |
| K.S(+57.02)QSEHFLYVAFK.T              | Y    | 66.19  | 1511.7408 | 12     | 0.6  | 756.8782  | 2 | 32.49 | 4        | F4:1431 | OB5922 H2 Ro.raw | 4.3132E4           | 1        | 1                      | 412   | 423 |                                                                                         | S1:Carbamidomethylation (DHKE, X@N-term):9.42                                                              | PEAKS PTM |
| N.GIEETIC(+71.04)TATVK.M              | N    | 65.44  | 1334.6752 | 12     | 3.2  | 668.3470  | 2 | 29.62 | 5        | F5:1395 | OB5945 H2 Ro.raw | 7.3781E3           | 1        | 1                      | 299   | 310 | Propionamide                                                                            | C7:Propionamide:1000.00                                                                                    | PEAKS PTM |
| V.PQNFAVAAK.S                         | N    | 63.04  | 944.5079  | 9      | 0.9  | 473.2617  | 2 | 32.86 | 4        | F4:1447 | OB5922 H2 Ro.raw | 2.0461E6           | 3        | 3                      | 403   | 411 |                                                                                         |                                                                                                            | PEAKS DB  |
| R.QLKNNNPFTFLVPPQDSQMIRt.V            | Y    | 61.56  | 2587.3218 | 22     | 0.9  | 863.4487  | 3 | 35.50 | 4        | F4:1601 | OB5922 H2 Ro.raw | 5.4546E5           | 2        | 2                      | 461   | 482 |                                                                                         |                                                                                                            | PEAKS DB  |
| R.RFNLAGKQEQEFLR.Y                    | Y    | 60.95  | 1734.9165 | 14     | 0.4  | 579.3130  | 3 | 31.51 | 5        | F5:1507 | OB5945 H2 Ro.raw | 6.1511E4           | 2        | 2                      | 193   | 206 |                                                                                         |                                                                                                            | PEAKS DB  |
| K.N(+.98)SYMWNLPEDVVANSYGLQYEQAR.Q    | Y    | 56.66  | 2847.2810 | 24     | 9.4  | 1424.6611 | 2 | 39.12 | 6        | F6:1945 | OB5946 H2 Ro.raw | 0                  | 0        | 0                      | 437   | 460 |                                                                                         | N1:Deamidation (NQ):7.38                                                                                   | PEAKS DB  |
| K.NNNPFTFLVPPQDSQMIRt.V               | Y    | 50.17  | 2218.0840 | 19     | 2.9  | 1110.0525 | 2 | 37.02 | 4        | F4:1690 | OB5922 H2 Ro.raw | 0                  | 0        | 0                      | 464   | 482 |                                                                                         |                                                                                                            | PEAKS DB  |
| N.G(+41.03)IEETIC(+57.02)TATVK.M      | N    | 47.00  | 1361.6860 | 12     | 0.7  | 681.8508  | 2 | 29.66 | 5        | F5:1390 | OB5945 H2 Ro.raw | 4.1987E4           | 2        | 2                      | 299   | 310 | Amidation of lysines or N-terminal amines with methyl acetimidate; Carbamidomethylation | G1:Amidation of lysines or N-terminal amines with methyl acetimidate:96.48;C7:Carbamidomethylation:1000.00 | PEAKS PTM |
| total 19 peptides                     |      |        |           |        |      |           |   |       |          |         |                  |                    |          |                        |       |     |                                                                                         |                                                                                                            |           |

Q647H1|Q647H1\_ARAHY

[back to list](#)

| [Protein Coverage](#) | [Supporting Peptides](#) |

Protein Coverage:



1 MVIGPFRLSL CVCLVFLTSA CFGTRLEESF NECQLDRLNA LTPDNRIESQ GGITETWNSN HPELRCAGVT LLKRTIFPNG  
81 FHLPSYANYP QLIFIAQGNG VFGVSLPGCP VTYEEAESQS REDRRQRIVI KRESEQEQQ QGDSSHKIYH FRQGHLLAIP  
161 AGVPYWSFNY GNEPIVAITL LDTSNLDNQL DPSPRRFYLA GNPEEEHPET QQQQPQTRRR HGQHQQDEYG SQGEEEGNNV  
241 LSGFSTQLLA HAFGVDEEIA RILQNPPET KDQIVRVEGG FRDVISPRWG EKGQYEDELE ERQRQPFRD EQGKGYYDD  
321 DRRPRHRQDP YREGDEDDR PRGSRQGQGR GYDDDDRRPG QYEEGEEDDR RPRRSSRPKR QGRRHDDDDR RADEDDRRGY  
401 DDDERRPEDD DRGYDDDER RPDDDDRQGY DDDDRRPRWS SRPKGQGRNG VEETLCSPTL VEDIARPSRA DFYNPAAGRI  
481 SSANSLTFPI LRWFQLSAEH VLLYRNGIYS PHWNNNANSI IYGLRGEGR I QVNSQGNV FNGVLREGQI LLVPQNFAVG  
561 KQAGNEGFEY VAFKTADRAS PATSSKCLGE SPLMFSSMLL AFEIIKSVLS NTMETRPLWS LLMIPSMGLN VVINLNHNNN  
641 AQVDSKNNDG SRLWWPSSII IK

Carbamidomethylation (+57.02)  
Diethylation (+56.06)

Supporting Peptides:

| Peptide                           | Uniq | -10lgP | Mass      | Length | ppm  | m/z       | z | RT    | Fraction | Scan    | Source File         | Area Roast<br>Ara h 2 | #Feature | #Feature Roast<br>Ara h 2 | Start | End | PTM                  | AScore                          | Found By     |
|-----------------------------------|------|--------|-----------|--------|------|-----------|---|-------|----------|---------|---------------------|-----------------------|----------|---------------------------|-------|-----|----------------------|---------------------------------|--------------|
| R.IQVNSQGNVFNGLR.E                | Y    | 138.92 | 1813.9799 | 17     | 2.5  | 907.9995  | 2 | 33.04 | 4        | F4:1457 | OB5922 H2<br>Ro.raw | 3.9071E5              | 3        | 3                         | 530   | 546 |                      |                                 | PEAKS<br>DB  |
| R.WFQLSAEHLVLR.N                  | Y    | 130.13 | 1660.8726 | 13     | -0.1 | 831.4435  | 2 | 34.60 | 6        | F6:1686 | OB5946 H2<br>Ro.raw | 5.0508E5              | 4        | 4                         | 493   | 505 |                      |                                 | PEAKS<br>DB  |
| R.ISSANSLTFILR.W                  | Y    | 104.78 | 1417.7928 | 13     | 0.5  | 709.9041  | 2 | 34.35 | 5        | F5:1668 | OB5945 H2<br>Ro.raw | 4.7913E5              | 3        | 3                         | 480   | 492 |                      |                                 | PEAKS<br>DB  |
| R.EGQILLVPQNFAVGK.Q               | Y    | 100.83 | 1611.8984 | 15     | 1.4  | 806.9576  | 2 | 34.53 | 4        | F4:1550 | OB5922 H2<br>Ro.raw | 3.6726E5              | 3        | 3                         | 547   | 561 |                      |                                 | PEAKS<br>DB  |
| K.QAGNEGFEYVAFK.T                 | Y    | 91.27  | 1458.6779 | 13     | 0.7  | 730.3467  | 2 | 32.31 | 4        | F4:1403 | OB5922 H2<br>Ro.raw | 2.1182E5              | 2        | 2                         | 562   | 574 |                      |                                 | PEAKS<br>DB  |
| R.ADFYNPAAGR.I                    | Y    | 89.68  | 1080.4988 | 10     | -0.6 | 541.2563  | 2 | 28.20 | 5        | F5:1311 | OB5945 H2<br>Ro.raw | 7.0309E3              | 3        | 3                         | 470   | 479 |                      |                                 | PEAKS<br>DB  |
| R.IQVNSQGNVFNGLREGQILLVPQNFAVGK.Q | Y    | 67.67  | 3407.8677 | 32     | 5.1  | 1136.9690 | 3 | 38.18 | 6        | F6:1888 | OB5946 H2<br>Ro.raw | 3.4122E4              | 1        | 1                         | 530   | 561 |                      |                                 | PEAKS<br>DB  |
| N.GVEETLC(+57.02)SPTLVEDIARPSR.A  | Y    | 50.19  | 2228.1106 | 20     | 2.1  | 743.7124  | 3 | 32.69 | 6        | F6:1580 | OB5946 H2<br>Ro.raw | 1.5861E5              | 2        | 2                         | 450   | 469 | Carbamidomethylation | C7:Carbamidomethylation:1000.00 | PEAKS<br>DB  |
| R.EGQILLVPQNFAVGK(+56.06).Q       | Y    | 48.11  | 1667.9609 | 15     | 0.8  | 834.9884  | 2 | 34.91 | 4        | F4:1568 | OB5922 H2<br>Ro.raw | 6.1967E5              | 2        | 2                         | 547   | 561 | Diethylation         | K15:Diethylation:121.40         | PEAKS<br>PTM |
| total 9 peptides                  |      |        |           |        |      |           |   |       |          |         |                     |                       |          |                           |       |     |                      |                                 |              |

A1E2B1|A1E2B1\_ARAHY

back to list

| Protein Coverage | Supporting Peptides |

Protein Coverage:

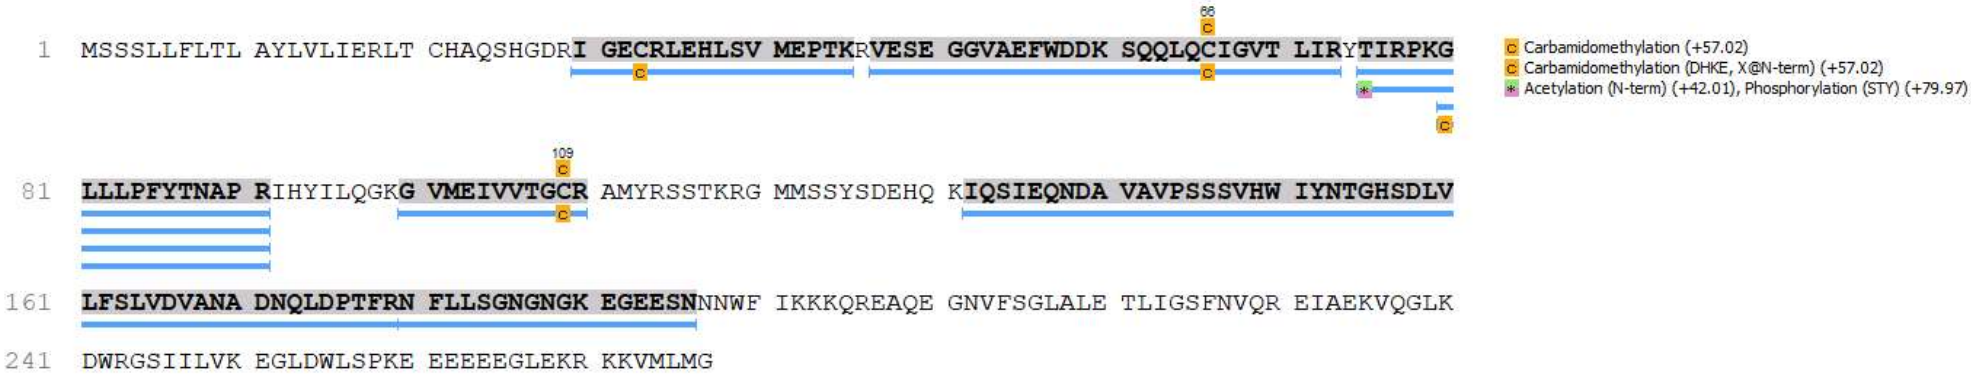

Supporting Peptides:

| Peptide                                 | Uniq | -10lgP | Mass      | Length | ppm  | m/z       | z | RT    | Fraction | Scan    | Source File      | Area Roast Ara h 2 | #Feature | #Feature Roast Ara h 2 | Start | End | PTM                                   | AScore                                           | Found By  |
|-----------------------------------------|------|--------|-----------|--------|------|-----------|---|-------|----------|---------|------------------|--------------------|----------|------------------------|-------|-----|---------------------------------------|--------------------------------------------------|-----------|
| K.GLLLPFYTNAPR.I                        | Y    | 131.34 | 1360.7502 | 12     | 1.9  | 681.3837  | 2 | 35.83 | 4        | F4:1614 | OB5922 H2 Ro.raw | 8.7006E5           | 3        | 3                      | 80    | 91  |                                       |                                                  | PEAKS DB  |
| K.GVMEIVTGC(+57.02)R.A                  | Y    | 116.98 | 1219.6053 | 11     | 0.2  | 610.8101  | 2 | 31.40 | 6        | F6:1498 | OB5946 H2 Ro.raw | 1.3757E5           | 2        | 2                      | 100   | 110 | Carbamidomethylation                  | C10:Carbamidomethylation:1000.00                 | PEAKS DB  |
| R.VESEGGVAEFWDDKSQQLQC(+57.02)IGVTLIR.Y | Y    | 98.95  | 3063.4971 | 27     | 2.5  | 1022.1755 | 3 | 37.32 | 4        | F4:1703 | OB5922 H2 Ro.raw | 5.5365E5           | 3        | 3                      | 47    | 73  | Carbamidomethylation                  | C20:Carbamidomethylation:1000.00                 | PEAKS DB  |
| Y.TIRPK(+149.03)GLLLPFYTNAPR.I          | Y    | 52.86  | 2105.1606 | 17     | -7.1 | 702.7225  | 3 | 34.93 | 5        | F5:1700 | OB5945 H2 Ro.raw | 5.1304E4           | 1        | 1                      | 75    | 91  |                                       | K5:Benzyl isothiocyanate:22.37                   | PEAKS PTM |
| K.G(+57.02)LLLPFYTNAPR.I                | Y    | 49.75  | 1417.7717 | 12     | 3.7  | 709.8958  | 2 | 35.99 | 4        | F4:1630 | OB5922 H2 Ro.raw | 0                  | 0        | 0                      | 80    | 91  | Carbamidomethylation (DHKE, X@N-term) | G1:Carbamidomethylation (DHKE, X@N-term):1000.00 | PEAKS PTM |
| R.NFLLSGN(+.98)GNGKEGEESN.N             | Y    | 47.77  | 1765.7754 | 17     | 2.2  | 883.8969  | 2 | 30.89 | 4        | F4:1327 | OB5922 H2 Ro.raw | 0                  | 0        | 0                      | 180   | 196 |                                       | N7:Deamidation (NQ):18.53                        | PEAKS DB  |
| R.IGEC(+57.02)RLEHLSVMEPTK.R            | Y    | 45.16  | 1897.9390 | 16     | 1.1  | 633.6543  | 3 | 31.15 | 5        | F5:1494 | OB5945 H2 Ro.raw | 1.9364E4           | 1        | 1                      | 30    | 45  | Carbamidomethylation                  | C4:Carbamidomethylation:1000.00                  | PEAKS DB  |



| Peptide                                                   | Uniq | -10lgP | Mass      | Length | ppm  | m/z       | z | RT    | Fraction | Scan    | Source File      | Area Roast Ara h 2 | #Feature | #Feature Roast Ara h 2 | Start | End | PTM                                         | AScore                                                                                   | Found By  |
|-----------------------------------------------------------|------|--------|-----------|--------|------|-----------|---|-------|----------|---------|------------------|--------------------|----------|------------------------|-------|-----|---------------------------------------------|------------------------------------------------------------------------------------------|-----------|
| Y.T(+42.01)(+79.97)IRPK(+28.03)GLLLPFYTNAPR.I             | Y    | 41.04  | 2106.1389 | 17     | -4.3 | 703.0505  | 3 | 35.64 | 4        | F4:1612 | OB5922 H2 Ro.raw | 1.8812E5           | 1        | 1                      | 75    | 91  | Acetylation (N-term); Phosphorylation (STY) | T1:Acetylation (N-term):100.00;T1:Phosphorylation (STY):71.87;K5:Dimethylation (KR):0.00 | PEAKS PTM |
| K.IQSIEQNDAVAVPSSSVHWIYNTGHSDLVLSLVDVAN(+.98)ADNQLDPTFR.N | Y    | 36.60  | 5282.5796 | 48     | 8.2  | 1321.6630 | 4 | 39.07 | 5        | F5:1954 | OB5945 H2 Ro.raw | 4.1788E4           | 1        | 1                      | 132   | 179 |                                             | N38:Deamidation (NQ):22.45                                                               | PEAKS DB  |
| total 9 peptides                                          |      |        |           |        |      |           |   |       |          |         |                  |                    |          |                        |       |     |                                             |                                                                                          |           |

A5Z1R0|A5Z1R0\_ARAHY

back to list

| Protein Coverage | Supporting Peptides |

Protein Coverage:

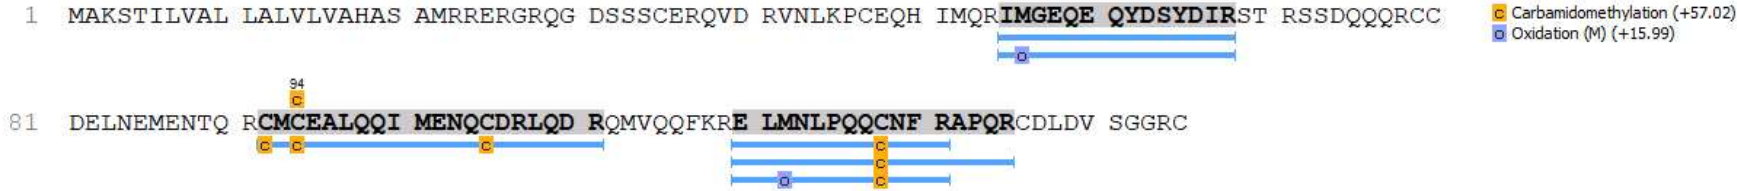

Supporting Peptides:

| Peptide                                          | Uniq | -10lgP | Mass      | Length | ppm | m/z      | z | RT    | Fraction | Scan    | Source File      | Area Roast Ara h 2 | #Feature | #Feature Roast Ara h 2 | Start | End | PTM                                 | AScore                                                                                          | Found By |
|--------------------------------------------------|------|--------|-----------|--------|-----|----------|---|-------|----------|---------|------------------|--------------------|----------|------------------------|-------|-----|-------------------------------------|-------------------------------------------------------------------------------------------------|----------|
| R.ELMNLPQQC(+57.02)NFR.A                         | Y    | 121.98 | 1548.7177 | 12     | 1.9 | 775.3676 | 2 | 31.56 | 4        | F4:1364 | OB5922 H2 Ro.raw | 2.7372E5           | 3        | 3                      | 120   | 131 | Carbamidomethylation                | C9:Carbamidomethylation:1000.00                                                                 | PEAKS DB |
| R.IMGEQEYDSYDIR,S                                | Y    | 120.66 | 1745.7566 | 14     | 2.9 | 873.8881 | 2 | 30.67 | 4        | F4:1316 | OB5922 H2 Ro.raw | 2.1664E5           | 3        | 3                      | 55    | 68  |                                     |                                                                                                 | PEAKS DB |
| R.ELMNLPQQC(+57.02)NFRAPQR.C                     | Y    | 68.46  | 2000.9673 | 16     | 0.5 | 667.9967 | 3 | 30.28 | 6        | F6:1430 | OB5946 H2 Ro.raw | 5.4257E4           | 1        | 1                      | 120   | 135 | Carbamidomethylation                | C9:Carbamidomethylation:1000.00                                                                 | PEAKS DB |
| R.C(+57.02)MC(+57.02)EALQQIMENQC(+57.02)DRLQDR.Q | Y    | 61.33  | 2597.0913 | 20     | 0.2 | 866.7046 | 3 | 33.64 | 6        | F6:1634 | OB5946 H2 Ro.raw | 1.3866E5           | 2        | 2                      | 92    | 111 | Carbamidomethylation                | C1:Carbamidomethylation:1000.00;C3:Carbamidomethylation:100.00;C14:Carbamidomethylation:1000.00 | PEAKS DB |
| R.IM(+15.99)GEQEYDSYDIR,S                        | Y    | 56.40  | 1761.7516 | 14     | 3.0 | 881.8857 | 2 | 28.72 | 5        | F5:1341 | OB5945 H2 Ro.raw | 0                  | 0        | 0                      | 55    | 68  | Oxidation (M)                       | M2:Oxidation (M):100.00                                                                         | PEAKS DB |
| R.ELM(+15.99)NLPQQC(+57.02)NFR.A                 | Y    | 46.49  | 1564.7126 | 12     | 1.3 | 783.3646 | 2 | 29.68 | 4        | F4:1254 | OB5922 H2 Ro.raw | 0                  | 0        | 0                      | 120   | 131 | Oxidation (M); Carbamidomethylation | M3:Oxidation (M):100.00;C9:Carbamidomethylation:1000.00                                         | PEAKS DB |
| total 6 peptides                                 |      |        |           |        |     |          |   |       |          |         |                  |                    |          |                        |       |     |                                     |                                                                                                 |          |

sp|Q647G9|CONG\_ARAHY

[back to list](#)

| [Protein Coverage](#) | [Supporting Peptides](#) |

Protein Coverage:

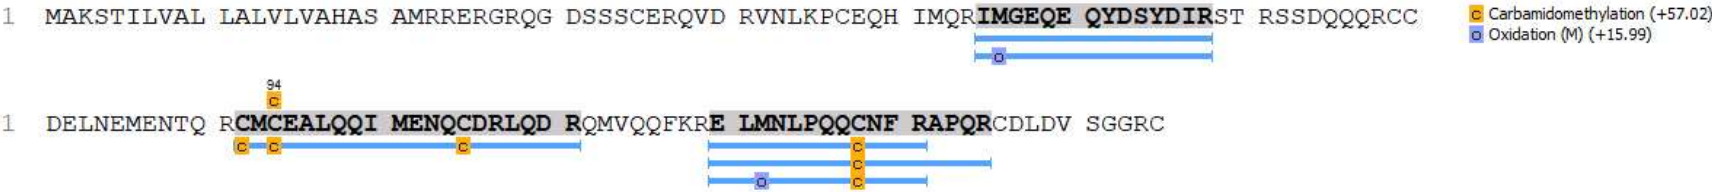

Supporting Peptides:

| Peptide                                          | Uniq | -10lgP | Mass      | Length | ppm | m/z      | z | RT    | Fraction | Scan    | Source File      | Area Roast Ara h 2 | #Feature | #Feature Roast Ara h 2 | Start | End | PTM                                 | AScore                                                                                           | Found By |
|--------------------------------------------------|------|--------|-----------|--------|-----|----------|---|-------|----------|---------|------------------|--------------------|----------|------------------------|-------|-----|-------------------------------------|--------------------------------------------------------------------------------------------------|----------|
| R.ELMNLPQQC(+57.02)NFR,A                         | Y    | 121.98 | 1548.7177 | 12     | 1.9 | 775.3676 | 2 | 31.56 | 4        | F4:1364 | OB5922 H2 Ro.raw | 2.7372E5           | 3        | 3                      | 120   | 131 | Carbamidomethylation                | C9:Carbamidomethylation:1000.00                                                                  | PEAKS DB |
| R.IMGEQEYDSYDIR,S                                | Y    | 120.66 | 1745.7566 | 14     | 2.9 | 873.8881 | 2 | 30.67 | 4        | F4:1316 | OB5922 H2 Ro.raw | 2.1664E5           | 3        | 3                      | 55    | 68  |                                     |                                                                                                  | PEAKS DB |
| R.ELMNLPQQC(+57.02)NFRAPQR,C                     | Y    | 68.46  | 2000.9673 | 16     | 0.5 | 667.9967 | 3 | 30.28 | 6        | F6:1430 | OB5946 H2 Ro.raw | 5.4257E4           | 1        | 1                      | 120   | 135 | Carbamidomethylation                | C9:Carbamidomethylation:1000.00                                                                  | PEAKS DB |
| R.C(+57.02)MC(+57.02)EALQQIMENQC(+57.02)DRLQDR,Q | Y    | 61.33  | 2597.0913 | 20     | 0.2 | 866.7046 | 3 | 33.64 | 6        | F6:1634 | OB5946 H2 Ro.raw | 1.3866E5           | 2        | 2                      | 92    | 111 | Carbamidomethylation                | C1:Carbamidomethylation:1000.00;C3:Carbamidomethylation:1000.00;C14:Carbamidomethylation:1000.00 | PEAKS DB |
| R.IM(+15.99)GEQEYDSYDIR,S                        | Y    | 56.40  | 1761.7516 | 14     | 3.0 | 881.8857 | 2 | 28.72 | 5        | F5:1341 | OB5945 H2 Ro.raw | 0                  | 0        | 0                      | 55    | 68  | Oxidation (M)                       | M2:Oxidation (M):1000.00                                                                         | PEAKS DB |
| R.ELM(+15.99)NLPQQC(+57.02)NFR,A                 | Y    | 46.49  | 1564.7126 | 12     | 1.3 | 783.3646 | 2 | 29.68 | 4        | F4:1254 | OB5922 H2 Ro.raw | 0                  | 0        | 0                      | 120   | 131 | Oxidation (M); Carbamidomethylation | M3:Oxidation (M):1000.00;C9:Carbamidomethylation:1000.00                                         | PEAKS DB |
| total 6 peptides                                 |      |        |           |        |     |          |   |       |          |         |                  |                    |          |                        |       |     |                                     |                                                                                                  |          |

sp|Q6PSU2|CONG7\_ARAHY

[back to list](#)

| [Protein Coverage](#) | [Supporting Peptides](#) |

Protein Coverage:

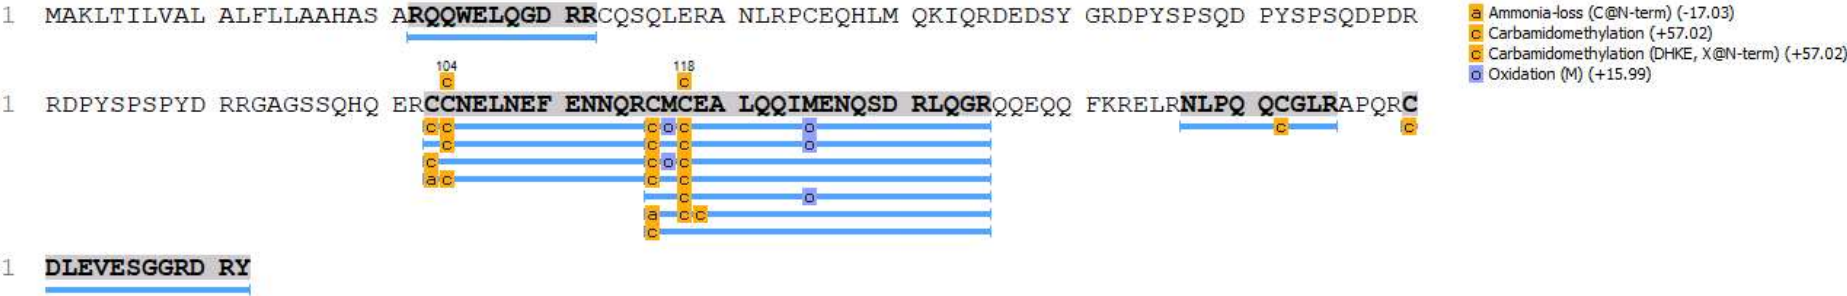

Supporting Peptides:

| Peptide                                          | Uniq | -10lgP | Mass      | Length | ppm  | m/z       | z | RT    | Fraction | Scan    | Source File      | Area Roast Ara h 2 | #Feature | #Feature Roast Ara h 2 | Start | End | PTM                                                                                  | AScore                                                                                                            | Found By  |
|--------------------------------------------------|------|--------|-----------|--------|------|-----------|---|-------|----------|---------|------------------|--------------------|----------|------------------------|-------|-----|--------------------------------------------------------------------------------------|-------------------------------------------------------------------------------------------------------------------|-----------|
| R.C(+57.02)MC(+57.02)EALQQIMENQSDRLQGR.Q         | Y    | 114.89 | 2466.0872 | 20     | 1.5  | 823.0375  | 3 | 33.97 | 4        | F4:1513 | OB5922 H2 Ro.raw | 2.638E6            | 4        | 4                      | 116   | 135 | Carbamidomethylation                                                                 | C1:Carbamidomethylation:1000.00;C3:Carbamidomethylation:1000.00                                                   | PEAKS DB  |
| R.C(+57.02)C(+57.02)NELNEFENNQR.C                | Y    | 97.90  | 1725.6835 | 13     | 1.4  | 863.8502  | 2 | 29.25 | 4        | F4:1229 | OB5922 H2 Ro.raw | 7.9798E4           | 3        | 3                      | 103   | 115 | Carbamidomethylation                                                                 | C1:Carbamidomethylation:1000.00;C2:Carbamidomethylation:1000.00                                                   | PEAKS DB  |
| R.C(+71.04)C(+57.02)NELNEFENNQR.C                | Y    | 94.71  | 1739.6992 | 13     | -1.9 | 870.8552  | 2 | 29.24 | 4        | F4:1230 | OB5922 H2 Ro.raw | 2.3314E4           | 2        | 2                      | 103   | 115 | Carbamidomethylation                                                                 | C1:Propionamide:17.01;C2:Carbamidomethylation:1000.00                                                             | PEAKS PTM |
| R.C(+57.02)C(+71.04)NELNEFENNQR.C                | Y    | 92.10  | 1739.6992 | 13     | 1.3  | 870.8580  | 2 | 28.90 | 6        | F6:1332 | OB5946 H2 Ro.raw | 2.335E4            | 2        | 2                      | 103   | 115 | Carbamidomethylation                                                                 | C1:Carbamidomethylation:1000.00;C2:Propionamide:0.00                                                              | PEAKS PTM |
| R.C(+57.02)MC(+57.02)EALQQIM(+15.99)ENQSDRLQGR.Q | Y    | 86.98  | 2482.0820 | 20     | 2.2  | 828.3698  | 3 | 31.37 | 4        | F4:1354 | OB5922 H2 Ro.raw | 4.9214E5           | 3        | 3                      | 116   | 135 | Carbamidomethylation; Oxidation (M)                                                  | C1:Carbamidomethylation:1000.00;C3:Carbamidomethylation:1000.00;M10:Oxidation (M):99.62                           | PEAKS DB  |
| R.C(+57.02)M(+15.99)C(+57.02)EALQQIMENQSDRLQGR.Q | Y    | 81.90  | 2482.0820 | 20     | 2.7  | 828.3702  | 3 | 32.38 | 4        | F4:1416 | OB5922 H2 Ro.raw | 5.0048E5           | 3        | 3                      | 116   | 135 | Carbamidomethylation; Oxidation (M)                                                  | C1:Carbamidomethylation:1000.00;M2:Oxidation (M):113.22;C3:Carbamidomethylation:1000.00                           | PEAKS DB  |
| R.C(+57.02)MC(+71.04)EALQQIMENQSDRLQGR.Q         | Y    | 72.98  | 2480.1028 | 20     | 0.2  | 827.7084  | 3 | 33.64 | 6        | F6:1632 | OB5946 H2 Ro.raw | 1.3204E5           | 1        | 1                      | 116   | 135 | Carbamidomethylation                                                                 | C1:Carbamidomethylation:1000.00;C3:Propionamide:0.00                                                              | PEAKS PTM |
| R.C(-17.03)MC(+57.02)E(+57.02)ALQQIMENQSDRLQGR.Q | Y    | 61.66  | 2449.0608 | 20     | -1.0 | 1225.5365 | 2 | 37.89 | 4        | F4:1744 | OB5922 H2 Ro.raw | 8.4646E5           | 4        | 4                      | 116   | 135 | Ammonia-loss (C@N-term); Carbamidomethylation; Carbamidomethylation (DHKE, X@N-term) | C1:Ammonia-loss (C@N-term):1000.00;C3:Carbamidomethylation:1000.00;E4:Carbamidomethylation (DHKE, X@N-term):83.89 | PEAKS PTM |
| R.C(+57.02)DLEVESGGRDRY                          | Y    | 55.61  | 1554.6732 | 13     | 1.2  | 778.3448  | 2 | 28.32 | 4        | F4:1171 | OB5922 H2 Ro.raw | 0                  | 0        | 0                      | 160   | 172 | Carbamidomethylation                                                                 | C1:Carbamidomethylation:1000.00                                                                                   | PEAKS DB  |
| total 14 peptides                                |      |        |           |        |      |           |   |       |          |         |                  |                    |          |                        |       |     |                                                                                      |                                                                                                                   |           |

| Peptide                                                  | Uniq | -10lgP | Mass      | Length | ppm  | m/z      | z | RT    | Fraction | Scan    | Source File      | Area Roast Ara h 2 | #Feature | #Feature Roast Ara h 2 | Start | End | PTM                                           | AScore                                                                                                             | Found By  |
|----------------------------------------------------------|------|--------|-----------|--------|------|----------|---|-------|----------|---------|------------------|--------------------|----------|------------------------|-------|-----|-----------------------------------------------|--------------------------------------------------------------------------------------------------------------------|-----------|
| A.RQQWELQGDRR.C                                          | Y    | 52.37  | 1470.7440 | 11     | -0.4 | 491.2551 | 3 | 29.55 | 4        | F4:1249 | OB5922 H2 Ro.raw | 1.0511E4           | 1        | 1                      | 22    | 32  |                                               |                                                                                                                    | PEAKS DB  |
| R.C(+57.02)M(+15.99)C(+57.02)EALQQIM(+15.99)ENQSDRLQGR.Q | Y    | 43.84  | 2498.0771 | 20     | -0.1 | 833.6996 | 3 | 29.67 | 5        | F5:1392 | OB5945 H2 Ro.raw | 6.8064E4           | 2        | 2                      | 116   | 135 | Carbamidomethylation; Oxidation (M)           | C1:Carbamidomethylation:1000.00;M2:Oxidation (M):1000.00;C3:Carbamidomethylation:1000.00;M10:Oxidation (M):1000.00 | PEAKS DB  |
| R.C(-17.03)C(+57.02)NE(+57.02)LNEFENNQR.C                | Y    | 42.16  | 1708.6570 | 13     | 0.2  | 855.3359 | 2 | 32.82 | 5        | F5:1595 | OB5945 H2 Ro.raw | 1.523E4            | 1        | 1                      | 103   | 115 | Ammonia-loss (C@N-term); Carbamidomethylation | C1:Ammonia-loss (C@N-term):1000.00;C2:Carbamidomethylation:1000.00;E4:Carbamidomethylation (DHKE, X@N-term):38.16  | PEAKS PTM |
| R.NLPQQC(+57.02)GLR.A                                    | Y    | 39.49  | 1084.5448 | 9      | 3.1  | 543.2814 | 2 | 26.19 | 4        | F4:1068 | OB5922 H2 Ro.raw | 2.4455E3           | 1        | 1                      | 147   | 155 | Carbamidomethylation                          | C6:Carbamidomethylation:1000.00                                                                                    | PEAKS DB  |
| R.C(+71.04)MC(+57.02)EALQQIM(+15.99)ENQSDRLQGR.Q         | Y    | 35.15  | 2496.0979 | 20     | 2.9  | 833.0424 | 3 | 31.03 | 6        | F6:1469 | OB5946 H2 Ro.raw | 1.5949E4           | 1        | 1                      | 116   | 135 | Carbamidomethylation; Oxidation (M)           | C1:Propionamide:15.21;C3:Carbamidomethylation:1000.00;M10:Oxidation (M):63.64                                      | PEAKS PTM |
| total 14 peptides                                        |      |        |           |        |      |          |   |       |          |         |                  |                    |          |                        |       |     |                                               |                                                                                                                    |           |

#CONTAM#P00761

[back to list](#)

| [Protein Coverage](#) | [Supporting Peptides](#) |

Protein Coverage:

1 FPTDDDDKIV GGYTCAANSI PYQVSLNSGS HFCGGS LINS QWVVSAAH CY KSRIQVR LGE HNIDVLEGNE QFINAAKIIT

81 HPNFNGNTLD NDI MLIKLSS PATLNSRVAT VSLPRSCAAA GTECLISGWG NTKSSGSSYP SLLQCLKAPV LSDSSCKSSY

161 PGQITGNMIC VGFLEGGKDS CQGDSGGPVV CNGQLQGI VS WYGCAQKNK PGVYTKVCNY VNWIQQTI AA N

Supporting Peptides:

| Peptide               | Uniq | -10lgP | Mass      | Length | ppm | m/z      | z | RT    | Fraction | Scan    | Source File      | Area Roast Ara h 2 | #Feature | #Feature Roast Ara h 2 | Start | End | PTM | AScore | Found By |
|-----------------------|------|--------|-----------|--------|-----|----------|---|-------|----------|---------|------------------|--------------------|----------|------------------------|-------|-----|-----|--------|----------|
| R.LGEHNIDVLEGNEQFIN.A | Y    | 81.75  | 1939.9275 | 17     | 0.7 | 970.9717 | 2 | 33.79 | 4        | F4:1501 | OB5922 H2 Ro.raw | 2.411E5            | 3        | 3                      | 58    | 74  |     |        | PEAKS DB |
| total 2 peptides      |      |        |           |        |     |          |   |       |          |         |                  |                    |          |                        |       |     |     |        |          |

| Peptide          | Uniq | -10lgP | Mass     | Length | ppm | m/z      | z | RT    | Fraction | Scan    | Source File      | Area Roast Ara h 2 | #Feature | #Feature Roast Ara h 2 | Start | End | PTM | AScore | Found By |
|------------------|------|--------|----------|--------|-----|----------|---|-------|----------|---------|------------------|--------------------|----------|------------------------|-------|-----|-----|--------|----------|
| R.VATVSLPR.S     | Y    | 51.16  | 841.5021 | 8      | 0.6 | 421.7586 | 2 | 27.54 | 6        | F6:1247 | OB5946 H2 Ro.raw | 8.6311E4           | 3        | 3                      | 108   | 115 |     |        | PEAKS DB |
| total 2 peptides |      |        |          |        |     |          |   |       |          |         |                  |                    |          |                        |       |     |     |        |          |

Peptide List

Prepared with PEAKS™ (bioinfor.com)

Summary

Ara h 3 GEL BAND RAW

1. Notes

Verz verz faint Ara h 3 isoform in this project dedicated to Ara h 3 and this is sample RAW Ara h 3. PTM66

2. Result Statistics

Figure 1. False discovery rate (FDR) curve. X axis is the number of peptides being kept. Y axis is the corresponding FDR.

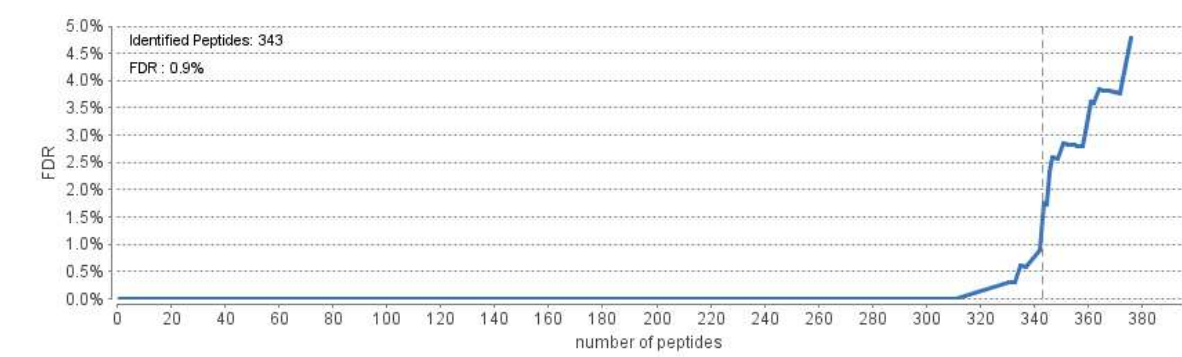

Figure 2. PSM score distribution. (a) Distribution of PEAKS peptide score; (b) Scatterplot of PEAKS peptide score versus precursor mass error.

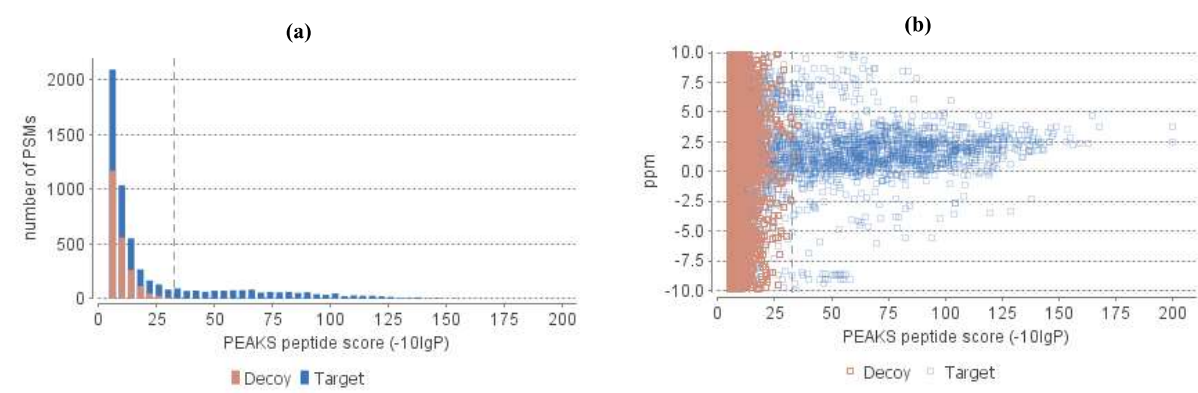

Table 1. Statistics of data.

|       | #Scans |       |          | #Features | Identified |        |             | #Peptides | #Sequences | #Proteins* |     |     |
|-------|--------|-------|----------|-----------|------------|--------|-------------|-----------|------------|------------|-----|-----|
|       | MS1    | MS/MS | #Chimera |           | #PSMs      | #Scans | #Features** |           |            | Groups     | All | Top |
| Total | 13358  | 10233 | 1612     | 27139     | 1390       | 1352   | 935         | 343       | 275        | 27         | 42  | 34  |

11/23/21, 6:08 PM

proteins

|         |       |       |      |       |      |      |     |     |     |    |    |    |
|---------|-------|-------|------|-------|------|------|-----|-----|-----|----|----|----|
| Raw     | 13358 | 10233 | 1612 | 27139 | 1390 | 1352 | 935 | 343 | 275 | 27 | 42 | 34 |
| Ara h 3 |       |       |      |       |      |      |     |     |     |    |    |    |

\* proteins with significant peptides are used in counts.  
 \*\* features are identified by DB search only.

**Figure 3.** Sample overlap for Proteins and Peptides (up to 8 samples). **(a)** All Proteins; **(b)** Top Proteins; **(c)** Peptides; ?

**(a)** Not applicable to only one sample      **(b)** Not applicable to only one sample      **(c)** Not applicable to only one sample

**Figure 4.** Distribution of peptide feature detection. **(a)** Feature m/z distribution; **(b)** Feature RT distribution.

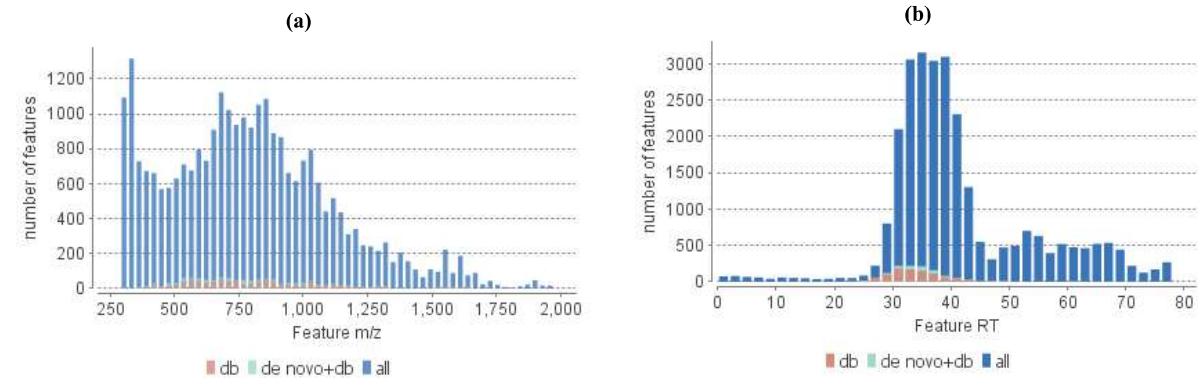

**Figure 5.** Distribution of identified peptide features. **(a)** Feature abundance distribution; **(b)** *De novo* sequencing validation. ?

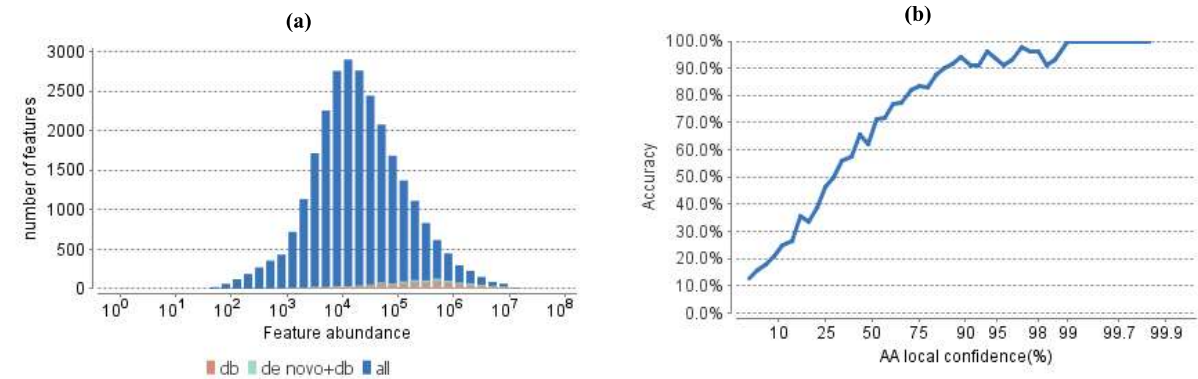

**Table 2.** Result filtration parameters.

|                          |       |
|--------------------------|-------|
| Peptide -10lgP           | ≥32.7 |
| PTM AScore               | ≥50   |
| Protein -10lgP           | ≥20   |
| Proteins unique peptides | ≥2    |
| De novo score(%)         | ≥50%  |

**Table 4.** PTM profile.

| Name            | ΔMass | Position | #PSM | -10lgP | Abundance | AScore  |
|-----------------|-------|----------|------|--------|-----------|---------|
| Carbamidomethyl | 57.02 | C        | 147  | 156.27 | 1.03E5    | 1000.00 |
| Oxidation       | 15.99 | M        | 65   | 159.13 | 6.58E5    | 1000.00 |
| Deamidation     | .98   | NQ       | 44   | 138.99 | 6.29E4    | 102.87  |



**Table 3.** Statistics of filtered result.  
FDR (Peptide-Spectrum Matches) 0.2%  
FDR (Peptide Sequences) 0.9%  
FDR (Protein Group) 0.0%  
De Novo Only Spectra 301

|                     |        | proteins       |    |        |        |         |  |
|---------------------|--------|----------------|----|--------|--------|---------|--|
| Acetylation         | 42.01  | Protein N-term | 29 | 103.49 | 6.15E4 | 1000.00 |  |
| SMA                 | 127.06 | N-term         | 23 | 58.01  | 6.87E6 | 1000.00 |  |
| Carbamidomethyl     | 57.02  | DE,N-term      | 21 | 96.93  | 7.12E4 | 30.02   |  |
| Methylation(others) | 14.02  | DHST           | 5  | 58.57  | 6.15E5 | 41.83   |  |
| Methylation(KR)     | 14.02  | KR             | 5  | 61.96  |        | 1000.00 |  |
| Ammonia loss        | -17.03 | N-term         | 4  | 67.01  | 4.09E5 | 1000.00 |  |
| Dihydroxy           | 31.99  | PY             | 4  | 58.57  | 6.15E5 | 104.80  |  |
| Oxidation           | 15.99  | PR             | 3  | 47.01  | 1.8E4  | 20.78   |  |
| Deoxy               | -15.99 | S              | 1  | 36.45  | 1.67E4 | 40.00   |  |
| Biotin              | 226.08 | N-term         | 1  | 33.77  |        | 1000.00 |  |
| Dimethylation(KR)   | 28.03  | R              | 1  | 89.94  | 3.05E5 | 1000.00 |  |
| Acetyl              | 42.01  | S              | 1  | 70.57  | 1.3E6  | 0.00    |  |
| Benzoyl             | 104.03 | N-term         | 1  | 38.94  | 1.27E5 | 124.10  |  |
| MethylamineST       | 13.03  | S              | 1  | 46.36  |        | 16.65   |  |
| Iodination          | 125.90 | Y              | 1  | 42.00  | 2.41E4 | 1000.00 |  |
| B-methylthiol       | 45.99  | D              | 1  | 64.39  | 6.35E5 | 71.27   |  |

3. Experiment Control

**Figure 6.** Precursor mass error of peptide-spectrum matches (PSM) in filtered result. **(a)** Distribution of precursor mass error in ppm; **(b)** Scatterplot of precursor m/z versus precursor mass error in ppm.

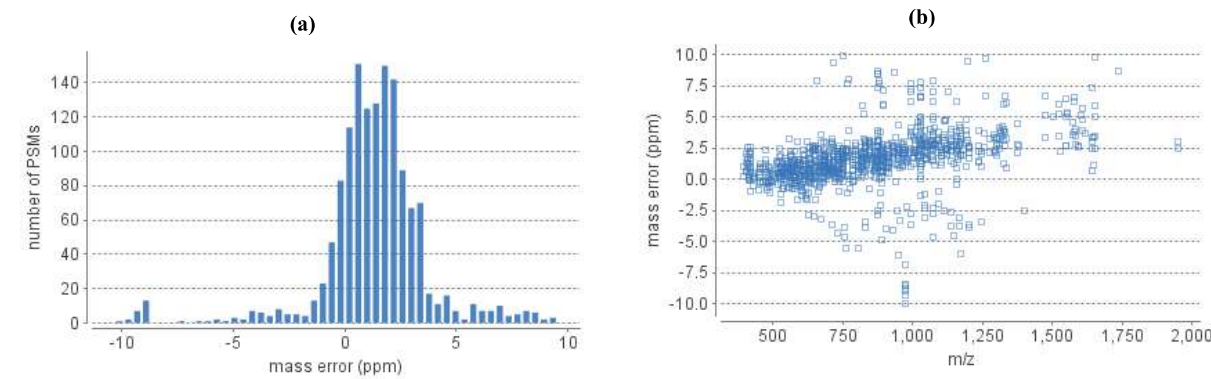

**Table 5.** Number of identified peptides in each sample by the number of missed cleavages.

|                  |     |     |    |   |    |
|------------------|-----|-----|----|---|----|
| Missed Cleavages | 0   | 1   | 2  | 3 | 4+ |
| Raw Ara h 3      | 166 | 136 | 41 | 0 | 0  |



4. Other Information

**Table 6.** Search parameters.  
PEAKS Version: PEAKS Studio 10.6 build 20201015  
Search Engine Name: PEAKS  
Parent Mass Error Tolerance: 10.0 ppm  
Fragment Mass Error Tolerance: 0.5 Da  
Precursor Mass Search Type: monoisotopic  
Enzyme: Trypsin  
Max Missed Cleavages: 2  
Digest Mode: Semispecific  
Fixed Modifications:  
    Carbamidomethylation: 57.02  
Variable Modifications:  
    Oxidation (M): 15.99  
    Deamidation (NQ): 0.98  
    Acetylation (K): 42.01  
    Acetylation (Protein N-term): 42.01  
    Acetylation (N-term): 42.01  
    Amidation: -0.98  
    Beta-methylthiolation: 45.99  
    Biotinylation: 226.08  
    and 303 more...  
Max Variable PTM Per Peptide: 5  
Database: Uniprot\_Peanut-3818\_Jul18  
Taxon: All  
Contaminant Database: contam MQ  
Searched Entry: 1723  
FDR Estimation: Enabled  
De novo score(%) threshold: 15  
Peptide hit threshold (-10logP): 30.0  
Peaks run ID: 65  
Merge Options: no merge  
Precursor Options: corrected  
Charge Options: no correction  
Filter m/z: 200.0 - 2000.0  
Filter Charge: 2 - 12  
Process: true  
Associate chimera: yes

**Table 7.** Instrument parameters.  
Fractions: OB5936 H3A raw.raw, OB5937 H3A raw.raw, OB5938 H3A raw.raw, OB5925 H3B raw.raw, OB5934 H3B raw.raw, OB5935 H3B raw.raw  
Ion Source: ESI(nano-spray)  
Fragmentation Mode: CID, CAD(y and b ions)  
MS Scan Mode: FT-ICR/Orbitrap  
MS/MS Scan Mode: FT-ICR/Orbitrap

Protein List

Protein Accession Contains:  
Protein Description Contains:  
Protein Sample Area >=  
Protein PTM Contains:

| Protein Group     | Protein ID | Accession                             | -10lgP | Coverage (%) | Coverage (%) Raw Ara h 3 | Area Raw Ara h 3 | #Peptides | #Unique | #Spec Raw Ara h 3 | PTM | Avg. Mass | Description                                                                             |
|-------------------|------------|---------------------------------------|--------|--------------|--------------------------|------------------|-----------|---------|-------------------|-----|-----------|-----------------------------------------------------------------------------------------|
| 1                 | 5          | <a href="#">N1NG13 N1NG13_ARAHY</a>   | 542.39 | 47           | 47                       | 5.9226E6         | 38        | 8       | 351               | Y   | 71345     | Seed storage protein Ara h1 OS=Arachis hypogaea OX=3818 GN=ARAX_AHF417E07-017 PE=4 SV=1 |
| 1                 | 4          | <a href="#">sp P43238 ALL12_ARAHY</a> | 542.39 | 47           | 47                       | 5.9226E6         | 38        | 8       | 351               | Y   | 71345     | Allergen Ara h 1, clone P41B OS=Arachis hypogaea OX=3818 PE=1 SV=1                      |
| 2                 | 1          | <a href="#">Q6PSU3 Q6PSU3_ARAHY</a>   | 534.59 | 52           | 52                       | 5.5582E6         | 38        | 3       | 342               | Y   | 66575     | Conarachin (Fragment) OS=Arachis hypogaea OX=3818 PE=4 SV=1                             |
| 2                 | 3          | <a href="#">sp P43237 ALL11_ARAHY</a> | 534.59 | 49           | 49                       | 5.5582E6         | 38        | 3       | 342               | Y   | 70283     | Allergen Ara h 1, clone P17 OS=Arachis hypogaea OX=3818 PE=1 SV=1                       |
| total 34 proteins |            |                                       |        |              |                          |                  |           |         |                   |     |           |                                                                                         |

| Protein Group     | Protein ID | Accession                                   | -10lgP | Coverage (%) | Coverage (%) Raw Ara h 3 | Area Raw Ara h 3 | #Peptides | #Unique | #Spec Raw Ara h 3 | PTM | Avg. Mass | Description                                                                                            |
|-------------------|------------|---------------------------------------------|--------|--------------|--------------------------|------------------|-----------|---------|-------------------|-----|-----------|--------------------------------------------------------------------------------------------------------|
| 2                 | 2          | <a href="#">B3IXL2 B3IXL2_ARAHY</a>         | 534.59 | 49           | 49                       | 5.5582E6         | 38        | 3       | 342               | Y   | 70283     | Main allergen Ara h1 OS=Arachis hypogaea OX=3818 PE=2 SV=1                                             |
| 6                 | 20         | <a href="#">Q38711 Q38711_ARAHY</a>         | 479.22 | 80           | 80                       | 6.0276E6         | 18        | 2       | 146               | Y   | 29134     | Galactose-binding lectin (Fragment) OS=Arachis hypogaea OX=3818 GN=Iec PE=2 SV=1                       |
| 7                 | 6          | <a href="#">T2B9M0 T2B9M0_ARAHY</a>         | 474.60 | 85           | 85                       | 5.4325E7         | 30        | 30      | 138               | Y   | 38383     | Fructose-bisphosphate aldolase OS=Arachis hypogaea OX=3818 PE=2 SV=1                                   |
| 8                 | 21         | <a href="#">A0A089ZXL7 A0A089ZXL7_ARAHY</a> | 467.31 | 83           | 83                       | 4.7657E5         | 19        | 3       | 125               | Y   | 29407     | Peanut agglutinin variant OS=Arachis hypogaea OX=3818 PE=2 SV=1                                        |
| 4                 | 25         | <a href="#">A1E2B0 A1E2B0_ARAHY</a>         | 455.92 | 63           | 63                       | 8.6911E7         | 18        | 16      | 163               | Y   | 33520     | 11S seed storage globulin B1 OS=Arachis hypogaea OX=3818 PE=2 SV=1                                     |
| 10                | 11         | <a href="#">A0A0F6VX63 A0A0F6VX63_ARAHY</a> | 387.54 | 66           | 66                       | 4.6311E7         | 22        | 22      | 72                | Y   | 36080     | Annexin OS=Arachis hypogaea OX=3818 PE=2 SV=1                                                          |
| 9                 | 29         | <a href="#">A0A0A6ZDP1 A0A0A6ZDP1_ARAHY</a> | 384.00 | 70           | 70                       | 8.9057E7         | 14        | 5       | 97                | Y   | 20101     | Glyceraldehyde-3-phosphate dehydrogenase C2 OS=Arachis hypogaea OX=3818 PE=2 SV=1                      |
| 15                | 8          | <a href="#">Q647H3 Q647H3_ARAHY</a>         | 337.54 | 39           | 39                       | 5.4041E5         | 13        | 2       | 52                | Y   | 61532     | Arachin Ahy-2 OS=Arachis hypogaea OX=3818 PE=2 SV=1                                                    |
| 13                | 41         | <a href="#">E9LFE8 E9LFE8_ARAHY</a>         | 318.55 | 36           | 36                       | 8.4221E6         | 6         | 4       | 54                | Y   | 28290     | 11S arachin (Fragment) OS=Arachis hypogaea OX=3818 PE=2 SV=1                                           |
| 19                | 35         | <a href="#">A0A0A6ZDT0 A0A0A6ZDT0_ARAHY</a> | 316.95 | 45           | 45                       | 1.1133E6         | 11        | 2       | 40                | Y   | 20099     | Glyceraldehyde-3-phosphate dehydrogenase C2 OS=Arachis hypogaea OX=3818 PE=4 SV=1                      |
| 11                | 42         | <a href="#">E9LFE9 E9LFE9_ARAHY</a>         | 299.25 | 45           | 45                       | 2.7097E7         | 9         | 9       | 56                | Y   | 28300     | 11S arachin OS=Arachis hypogaea OX=3818 PE=2 SV=1                                                      |
| 23                | 24         | <a href="#">A0A0F7GF62 A0A0F7GF62_ARAHY</a> | 262.78 | 40           | 40                       | 1.6839E6         | 8         | 8       | 16                | Y   | 36134     | Annexin OS=Arachis hypogaea OX=3818 GN=AnnAh6 PE=2 SV=1                                                |
| 21                | 27         | <a href="#">Q6IWG5 Q6IWG5_ARAHY</a>         | 242.80 | 38           | 38                       | 7.7017E6         | 9         | 9       | 18                | Y   | 58061     | Glycinin (Fragment) OS=Arachis hypogaea OX=3818 PE=2 SV=1                                              |
| 21                | 28         | <a href="#">Q0GM57 Q0GM57_ARAHY</a>         | 242.80 | 38           | 38                       | 7.7017E6         | 9         | 9       | 18                | Y   | 58263     | Iso-Ara h3 OS=Arachis hypogaea OX=3818 PE=2 SV=1                                                       |
| 26                | 31         | <a href="#">D8KXZ8 D8KXZ8_ARAHY</a>         | 233.90 | 37           | 37                       | 1.6879E4         | 9         | 2       | 13                | Y   | 41475     | Enoyl-ACP reductase 1-3 OS=Arachis hypogaea OX=3818 GN=ENR1-3 PE=2 SV=1                                |
| 24                | 51         | <a href="#">H6U596 H6U596_ARAHY</a>         | 220.07 | 31           | 31                       | 2.0502E7         | 6         | 6       | 15                | N   | 19370     | Alcohol dehydrogenase (Fragment) OS=Arachis hypogaea OX=3818 PE=2 SV=1                                 |
| 20                | 48         | <a href="#">B4UW81 B4UW81_ARAHY</a>         | 218.20 | 46           | 46                       | 1.0555E7         | 5         | 5       | 23                | Y   | 20343     | Glutathione S-transferase 2 OS=Arachis hypogaea OX=3818 PE=2 SV=1                                      |
| 22                | 49         | <a href="#">N1NKG9 N1NKG9_ARAHY</a>         | 213.01 | 36           | 36                       | 2.7737E6         | 4         | 4       | 17                | N   | 26041     | Seed maturation protein OS=Arachis hypogaea OX=3818 GN=ARAX_AHF417E07-003 PE=4 SV=1                    |
| 30                | 46         | <a href="#">Q42515 Q42515_ARAHY</a>         | 201.87 | 21           | 21                       | 9.0898E5         | 3         | 3       | 8                 | Y   | 28924     | Chitinase (Class II) OS=Arachis hypogaea OX=3818 GN=chi2;2 PE=2 SV=1                                   |
| 28                | 37         | <a href="#">A0A075M981 A0A075M981_ARAHY</a> | 199.37 | 16           | 16                       | 1.3383E6         | 6         | 6       | 11                | Y   | 51912     | Ribulose bisphosphate carboxylase large chain (Fragment) OS=Arachis hypogaea OX=3818 GN=rbcL PE=3 SV=1 |
| 28                | 38         | <a href="#">A0A191UJ50 A0A191UJ50_ARAHY</a> | 199.37 | 16           | 16                       | 1.3383E6         | 6         | 6       | 11                | Y   | 52587     | Ribulose bisphosphate carboxylase large chain OS=Arachis hypogaea OX=3818 GN=rbcL PE=3 SV=1            |
| 28                | 36         | <a href="#">Q20356 Q20356_ARAHY</a>         | 199.37 | 17           | 17                       | 1.3383E6         | 6         | 6       | 11                | Y   | 51526     | Ribulose bisphosphate carboxylase large chain (Fragment) OS=Arachis hypogaea OX=3818 GN=rbcL PE=3 SV=1 |
| 31                | 43         | <a href="#">A0A0R4UXQ1 A0A0R4UXQ1_ARAHY</a> | 184.49 | 20           | 20                       | 9.4117E5         | 4         | 4       | 7                 | Y   | 48348     | 3-ketoacyl-CoA thiolase OS=Arachis hypogaea OX=3818 GN=PKT PE=2 SV=1                                   |
| 32                | 50         | <a href="#">sp Q647H2 AHY3_ARAHY</a>        | 155.59 | 3            | 3                        | 5.4508E5         | 2         | 2       | 5                 | N   | 54569     | Arachin Ahy-3 OS=Arachis hypogaea OX=3818 PE=1 SV=1                                                    |
| 37                | 80         | <a href="#">B4UWD5 B4UWD5_ARAHY</a>         | 142.60 | 26           | 26                       | 1.1738E6         | 2         | 2       | 4                 | N   | 15013     | Proteasome subunit alpha type (Fragment) OS=Arachis hypogaea OX=3818 PE=2 SV=1                         |
| 33                | 53         | <a href="#">A5Z1R0 A5Z1R0_ARAHY</a>         | 128.86 | 23           | 23                       | 3.4109E5         | 2         | 2       | 5                 | Y   | 16920     | Ara h 6 allergen OS=Arachis hypogaea OX=3818 GN=Ara h 6 PE=4 SV=1                                      |
| 33                | 52         | <a href="#">sp Q647G9 CONG_ARAHY</a>        | 128.86 | 23           | 23                       | 3.4109E5         | 2         | 2       | 5                 | Y   | 16920     | Conglutin OS=Arachis hypogaea OX=3818 PE=1 SV=1                                                        |
| 25                | 58         | <a href="#">#CONTAM#P00761</a>              | 123.14 | 15           | 15                       | 2.8404E5         | 3         | 3       | 14                | N   | 24409     | SWISS-PROT:#CONTAM#P00761 TRYP_PIG Trypsin - Sus scrofa (Pig).                                         |
| 39                | 59         | <a href="#">E5FHZ2 E5FHZ2_ARAHY</a>         | 120.16 | 20           | 20                       | 7.7408E5         | 3         | 3       | 3                 | N   | 27370     | Late embryogenesis abundant protein group 5 protein OS=Arachis hypogaea OX=3818 GN=LEA5-2 PE=2 SV=1    |
| 35                | 120        | <a href="#">Q06H31 Q06H31_ARAHY</a>         | 106.48 | 26           | 26                       | 9.4736E5         | 2         | 2       | 5                 | Y   | 19128     | Translationally controlled tumor-like protein OS=Arachis hypogaea OX=3818 PE=2 SV=1                    |
| total 34 proteins |            |                                             |        |              |                          |                  |           |         |                   |     |           |                                                                                                        |

N1NG13|N1NG13\_ARAHY

[back to list](#)

| [Protein Coverage](#) | [Supporting Peptides](#) |

Protein Coverage:

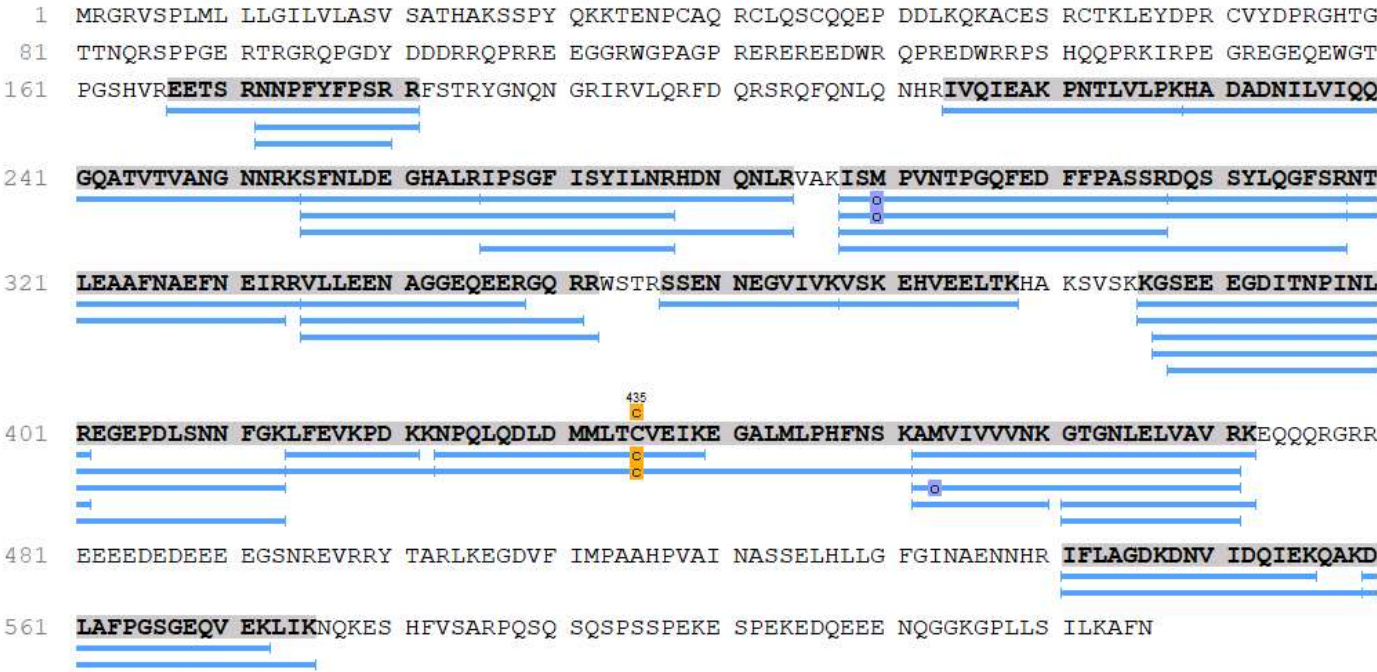

Carbamidomethylation (+57.02)  
Oxidation (M) (+15.99)

Supporting Peptides:

| Peptide                              | Uniq | -10lgP | Mass      | Length | ppm | m/z       | z | RT    | Fraction | Scan    | Source File              | Area Raw<br>Ara h 3 | #Feature | #Feature<br>Raw Ara h 3 | Start | End | PTM                  | AScore                           | Found By    |
|--------------------------------------|------|--------|-----------|--------|-----|-----------|---|-------|----------|---------|--------------------------|---------------------|----------|-------------------------|-------|-----|----------------------|----------------------------------|-------------|
| K.ISMPVNTPGQFEDFFPASSR.D             | N    | 164.25 | 2226.0415 | 20     | 4.6 | 1114.0332 | 2 | 35.91 | 4        | F4:1601 | OB5925<br>H3B<br>raw.raw | 7.0048E6            | 6        | 6                       | 288   | 307 |                      |                                  | PEAKS<br>DB |
| K.ISM(+15.99)PVNTPGQFEDFFPASSR.D     | N    | 159.13 | 2242.0364 | 20     | 2.3 | 1122.0281 | 2 | 34.42 | 4        | F4:1522 | OB5925<br>H3B<br>raw.raw | 1.6427E6            | 5        | 5                       | 288   | 307 | Oxidation (M)        | M3:Oxidation (M):1000.00         | PEAKS<br>DB |
| K.NPQLQDLDMMMLTC(+57.02)VEIK.E       | N    | 156.27 | 2046.9788 | 17     | 2.3 | 1024.4990 | 2 | 37.39 | 5        | F5:1843 | OB5934<br>H3B<br>raw.raw | 3.0752E5            | 3        | 3                       | 423   | 439 | Carbamidomethylation | C13:Carbamidomethylation:1000.00 | PEAKS<br>DB |
| K.KGSEEEGDITNPINLREGEPLDLSNNFGK.L    | Y    | 143.03 | 3058.4478 | 28     | 1.8 | 1020.4917 | 3 | 31.22 | 5        | F5:1480 | OB5934<br>H3B<br>raw.raw | 4.8628E5            | 7        | 7                       | 386   | 413 |                      |                                  | PEAKS<br>DB |
| K.HADADNILVIQQGQATVTVAN(+.98)GNNRK.S | N    | 134.38 | 2747.3950 | 26     | 2.1 | 916.8075  | 3 | 29.70 | 2        | F2:1436 | OB5937<br>H3A<br>raw.raw | 1.18E6              | 5        | 5                       | 229   | 254 |                      | N21:Deamidation (NQ):15.73       | PEAKS<br>DB |
| R.IFLAGDKDNVIDQIEKQAK.D              | N    | 133.54 | 2144.1477 | 19     | 1.1 | 715.7240  | 3 | 32.93 | 5        | F5:1578 | OB5934<br>H3B<br>raw.raw | 3.7212E6            | 6        | 6                       | 541   | 559 |                      |                                  | PEAKS<br>DB |
| R.IPSGFISYILNR.H                     | N    | 131.66 | 1378.7609 | 12     | 1.8 | 690.3889  | 2 | 37.02 | 5        | F5:1820 | OB5934<br>H3B<br>raw.raw | 2.3128E7            | 6        | 6                       | 266   | 277 |                      |                                  | PEAKS<br>DB |
| K.SFNLDEGHALRIPSGFISYILNR.H          | N    | 130.89 | 2618.3604 | 23     | 2.5 | 873.7963  | 3 | 40.61 | 4        | F4:1864 | OB5925<br>H3B<br>raw.raw | 4.4362E7            | 16       | 16                      | 255   | 277 |                      |                                  | PEAKS<br>DB |
| R.NTLEAAFNAEFNEIR.R                  | N    | 130.33 | 1737.8322 | 15     | 2.0 | 869.9250  | 2 | 35.72 | 4        | F4:1599 | OB5925<br>H3B<br>raw.raw | 4.8629E5            | 2        | 2                       | 319   | 333 |                      |                                  | PEAKS<br>DB |

total 52 peptides

| Peptide                                   | Uniq | -10lgP | Mass      | Length | ppm  | m/z       | z | RT    | Fraction | Scan    | Source File              | Area Raw<br>Ara h 3 | #Feature | #Feature<br>Raw Ara h 3 | Start | End | PTM                  | AScore                           | Found<br>By |
|-------------------------------------------|------|--------|-----------|--------|------|-----------|---|-------|----------|---------|--------------------------|---------------------|----------|-------------------------|-------|-----|----------------------|----------------------------------|-------------|
| R.IFLAGDKDNVIDQIEK,Q                      | N    | 122.64 | 1816.9570 | 16     | 2.7  | 909.4882  | 2 | 32.53 | 5        | F5:1557 | OB5934<br>H3B<br>raw.raw | 2.0088E7            | 12       | 12                      | 541   | 556 |                      |                                  | PEAKS<br>DB |
| K.SFNLDEGHALR,I                           | N    | 115.46 | 1257.6101 | 11     | -0.1 | 629.8123  | 2 | 28.39 | 2        | F2:1360 | OB5937<br>H3A<br>raw.raw | 8.0983E5            | 11       | 11                      | 255   | 265 |                      |                                  | PEAKS<br>DB |
| R.DQSSYLQGFSR,N                           | N    | 113.23 | 1286.5891 | 11     | 2.4  | 644.3033  | 2 | 31.02 | 2        | F2:1506 | OB5937<br>H3A<br>raw.raw | 1.7114E6            | 5        | 5                       | 308   | 318 |                      |                                  | PEAKS<br>DB |
| K.GSEEEGDITNPINLREGEPLDLSNNFGK,L          | Y    | 109.87 | 2930.3530 | 27     | 1.6  | 977.7932  | 3 | 32.18 | 4        | F4:1388 | OB5925<br>H3B<br>raw.raw | 6.897E5             | 3        | 3                       | 387   | 413 |                      |                                  | PEAKS<br>DB |
| K.HADADNILVIQQGQATVTVANGNNRK,S            | N    | 109.04 | 2746.4111 | 26     | 1.7  | 916.4792  | 3 | 29.52 | 2        | F2:1425 | OB5937<br>H3A<br>raw.raw | 1.1363E6            | 5        | 5                       | 229   | 254 |                      |                                  | PEAKS<br>DB |
| K.AMVIVVVNKG TGNLELVA VRK,E               | N    | 105.72 | 2209.2981 | 21     | 0.6  | 737.4404  | 3 | 34.43 | 1        | F1:1679 | OB5936<br>H3A<br>raw.raw | 1.0985E7            | 7        | 7                       | 452   | 472 |                      |                                  | PEAKS<br>DB |
| R.IPSGFISYILNRHDNQNL R,V                  | N    | 105.41 | 2256.1763 | 19     | 1.1  | 753.0669  | 3 | 34.19 | 2        | F2:1689 | OB5937<br>H3A<br>raw.raw | 3.796E7             | 18       | 18                      | 266   | 284 |                      |                                  | PEAKS<br>DB |
| K.KGSEEEGDITNPINLR,E                      | Y    | 103.49 | 1770.8748 | 16     | 0.6  | 886.4452  | 2 | 28.95 | 2        | F2:1396 | OB5937<br>H3A<br>raw.raw | 1.4319E5            | 11       | 11                      | 386   | 401 |                      |                                  | PEAKS<br>DB |
| K.DLA FPGSGEQVEKLIK,N                     | N    | 102.68 | 1729.9249 | 16     | 1.0  | 865.9706  | 2 | 33.30 | 5        | F5:1601 | OB5934<br>H3B<br>raw.raw | 6.2551E5            | 3        | 3                       | 560   | 575 |                      |                                  | PEAKS<br>DB |
| R.VLLEENAGGEQEER,G                        | N    | 97.57  | 1571.7427 | 14     | 0.2  | 786.8788  | 2 | 27.11 | 2        | F2:1274 | OB5937<br>H3A<br>raw.raw | 1.1444E5            | 4        | 4                       | 335   | 348 |                      |                                  | PEAKS<br>DB |
| R.IVQIEAKPNTLVLPK,H                       | Y    | 92.83  | 1662.0079 | 15     | 2.0  | 832.0129  | 2 | 30.46 | 2        | F2:1476 | OB5937<br>H3A<br>raw.raw | 4.4939E6            | 12       | 12                      | 214   | 228 |                      |                                  | PEAKS<br>DB |
| R.NTLEAAFNAEFNEIRR,V                      | N    | 92.46  | 1893.9332 | 16     | 2.6  | 947.9763  | 2 | 34.61 | 5        | F5:1666 | OB5934<br>H3B<br>raw.raw | 5.3025E7            | 15       | 15                      | 319   | 334 |                      |                                  | PEAKS<br>DB |
| K.AM(+15.99)VIVVVNKG TGNLELVA VRK,K       | N    | 91.27  | 2097.1980 | 20     | 1.9  | 1049.6083 | 2 | 33.11 | 5        | F5:1594 | OB5934<br>H3B<br>raw.raw | 2.0031E6            | 4        | 4                       | 452   | 471 | Oxidation (M)        | M2:Oxidation (M):1000.00         | PEAKS<br>DB |
| K.NPQLQDLDMMLTC(+57.02)VEIKEGALMLPHFNSK,A | N    | 90.42  | 3371.6387 | 29     | 0.9  | 843.9177  | 4 | 38.28 | 2        | F2:1944 | OB5937<br>H3A<br>raw.raw | 7.6836E6            | 5        | 5                       | 423   | 451 | Carbamidomethylation | C13:Carbamidomethylation:1000.00 | PEAKS<br>DB |
| K.DLA FPGSGEQVEK,L                        | N    | 90.32  | 1375.6619 | 13     | 1.8  | 688.8395  | 2 | 30.46 | 2        | F2:1473 | OB5937<br>H3A<br>raw.raw | 8.5836E5            | 6        | 6                       | 560   | 572 |                      |                                  | PEAKS<br>DB |
| K.AMVIVVVNKG TGNLELVA VRK,K               | N    | 88.82  | 2081.2031 | 20     | 2.3  | 1041.6112 | 2 | 34.47 | 3        | F3:1725 | OB5938<br>H3A<br>raw.raw | 3.2769E6            | 3        | 3                       | 452   | 471 |                      |                                  | PEAKS<br>DB |
| R.NNPFYFPSRR,F                            | N    | 88.17  | 1296.6364 | 10     | 1.1  | 649.3262  | 2 | 29.14 | 3        | F3:1401 | OB5938<br>H3A<br>raw.raw | 2.2468E6            | 9        | 9                       | 172   | 181 |                      |                                  | PEAKS<br>DB |
| K.ISMPVNTPGQFEDFFPASSRDQSSYLQGFSR,N       | N    | 84.22  | 3494.6201 | 31     | 2.7  | 1165.8838 | 3 | 36.29 | 4        | F4:1620 | OB5925<br>H3B<br>raw.raw | 1.0081E7            | 6        | 6                       | 288   | 318 |                      |                                  | PEAKS<br>DB |
| K.HADADNILVIQQGQATVTVANGNN(+.98)RK,S      | N    | 79.42  | 2747.3950 | 26     | 4.5  | 1374.7109 | 2 | 29.70 | 2        | F2:1444 | OB5937<br>H3A<br>raw.raw | 1.1778E4            | 1        | 1                       | 229   | 254 |                      | N24:Deamidation (NQ):7.21        | PEAKS<br>DB |
| R.SSENNEGVIVK,V                           | Y    | 77.21  | 1174.5830 | 11     | 0.7  | 588.2992  | 2 | 23.63 | 3        | F3:1098 | OB5938<br>H3A<br>raw.raw | 1.1897E4            | 3        | 3                       | 357   | 367 |                      |                                  | PEAKS<br>DB |
| K.SFNLDEGHALRIPSGFISYILNRHDNQNL R,V       | N    | 70.02  | 3495.7759 | 30     | 0.6  | 700.1629  | 5 | 38.32 | 1        | F1:1912 | OB5936<br>H3A<br>raw.raw | 2.2417E7            | 7        | 7                       | 255   | 284 |                      |                                  | PEAKS<br>DB |

total 52 peptides

| Peptide                                           | Uniq | -10lgP | Mass      | Length | ppm  | m/z       | z | RT    | Fraction | Scan    | Source File              | Area Raw<br>Ara h 3 | #Feature | #Feature<br>Raw Ara h 3 | Start | End | PTM                  | AScore                                                           | Found<br>By  |
|---------------------------------------------------|------|--------|-----------|--------|------|-----------|---|-------|----------|---------|--------------------------|---------------------|----------|-------------------------|-------|-----|----------------------|------------------------------------------------------------------|--------------|
| R.VLLEENAGGEQEERGQR,R                             | N    | 65.63  | 1912.9238 | 17     | 0.0  | 638.6486  | 3 | 29.50 | 1        | F1:1389 | OB5936<br>H3A<br>raw.raw | 4.0372E4            | 2        | 2                       | 335   | 351 |                      |                                                                  | PEAKS<br>DB  |
| R.IFLAGDKDNVIDQ(+.98)IEKQAK,D                     | N    | 64.02  | 2145.1316 | 19     | 9.3  | 716.0578  | 3 | 32.93 | 4        | F4:1432 | OB5925<br>H3B<br>raw.raw | 1.5596E6            | 1        | 1                       | 541   | 559 |                      | Q13:Deamidation (NQ):<br>0.00                                    | PEAKS<br>DB  |
| K.GTGNLELVAVR,K                                   | N    | 62.22  | 1127.6299 | 11     | 0.1  | 564.8223  | 2 | 29.90 | 3        | F3:1460 | OB5938<br>H3A<br>raw.raw | 1.5877E5            | 3        | 3                       | 461   | 471 |                      |                                                                  | PEAKS<br>DB  |
| K.AMVIVVVK,G                                      | N    | 61.23  | 971.5837  | 9      | -0.3 | 486.7990  | 2 | 29.89 | 4        | F4:1251 | OB5925<br>H3B<br>raw.raw | 0                   | 0        | 0                       | 452   | 460 |                      |                                                                  | PEAKS<br>DB  |
| R.NNPFYFPSR,R                                     | N    | 60.62  | 1140.5352 | 9      | -0.1 | 571.2748  | 2 | 31.58 | 3        | F3:1564 | OB5938<br>H3A<br>raw.raw | 4.133E4             | 1        | 1                       | 172   | 180 |                      |                                                                  | PEAKS<br>DB  |
| K.ISM(+15.99)PVNTPGQFEDFFPASSRDQSSYLQGFSR,N       | N    | 59.85  | 3510.6150 | 31     | 1.9  | 1171.2145 | 3 | 34.93 | 3        | F3:1753 | OB5938<br>H3A<br>raw.raw | 4.1096E6            | 6        | 6                       | 288   | 318 | Oxidation (M)        | M3:Oxidation (M):1000.<br>00                                     | PEAKS<br>DB  |
| K.HADADNILVIQGGQ(+.98)ATVTVANGNNRK,S              | N    | 57.58  | 2747.3950 | 26     | 0.5  | 687.8564  | 4 | 29.52 | 3        | F3:1436 | OB5938<br>H3A<br>raw.raw | 1.466E5             | 1        | 1                       | 229   | 254 |                      | Q14:Deamidation (NQ):<br>5.77                                    | PEAKS<br>DB  |
| K.NPQLQDLDMMLTC(+57.02)VEIKEGALM(+15.99)LPHFNSK,A | N    | 54.78  | 3387.6335 | 29     | 2.9  | 847.9181  | 4 | 37.33 | 2        | F2:1882 | OB5937<br>H3A<br>raw.raw | 2.6128E6            | 2        | 2                       | 423   | 451 | Carbamidomethylation | C13:Carbamidomethyla<br>tion:1000.00;M22:Oxid<br>ation (M):19.27 | PEAKS<br>DB  |
| R.IPSGFISYILN(+.98)RHDNQNL,R                      | N    | 53.84  | 2257.1604 | 19     | 9.9  | 753.4015  | 3 | 37.61 | 4        | F4:1698 | OB5925<br>H3B<br>raw.raw | 2.7971E5            | 1        | 1                       | 266   | 284 |                      | N11:Deamidation (NQ):<br>33.06                                   | PEAKS<br>DB  |
| R.EETSRNPNFYFPSRR,F                               | N    | 53.22  | 1898.9023 | 15     | -0.2 | 633.9746  | 3 | 28.39 | 3        | F3:1372 | OB5938<br>H3A<br>raw.raw | 2.391E4             | 1        | 1                       | 167   | 181 |                      |                                                                  | PEAKS<br>DB  |
| R.I(+57.02)FLAGDKDNVIDQIEK,Q                      | N    | 51.72  | 1873.9785 | 16     | 1.3  | 937.9977  | 2 | 32.56 | 4        | F4:1413 | OB5925<br>H3B<br>raw.raw | 1.5532E5            | 1        | 1                       | 541   | 556 |                      | I1:Carbamidomethylatio<br>n (DHKE, X@N-term):3<br>2.60           | PEAKS<br>PTM |
| K.GSEEEGDITNPINLR,E                               | Y    | 50.96  | 1642.7798 | 15     | 0.4  | 822.3975  | 2 | 32.95 | 1        | F1:1607 | OB5936<br>H3A<br>raw.raw | 7.6191E3            | 1        | 1                       | 387   | 401 |                      |                                                                  | PEAKS<br>DB  |
| K.GTGNLELVAVRK,E                                  | N    | 49.78  | 1255.7249 | 12     | 0.1  | 628.8698  | 2 | 27.83 | 2        | F2:1327 | OB5937<br>H3A<br>raw.raw | 1.327E4             | 2        | 2                       | 461   | 472 |                      |                                                                  | PEAKS<br>DB  |
| K.LFEVKPKD,K                                      | N    | 47.93  | 974.5436  | 8      | 0.9  | 488.2795  | 2 | 26.83 | 2        | F2:1264 | OB5937<br>H3A<br>raw.raw | 1.0234E3            | 1        | 1                       | 414   | 421 |                      |                                                                  | PEAKS<br>DB  |
| K.KGSEEEGDITNPINLREGEPLSNN(+.98)FGK,L             | Y    | 46.27  | 3059.4319 | 28     | 7.6  | 765.8711  | 4 | 31.46 | 6        | F6:1493 | OB5935<br>H3B<br>raw.raw | 3.4976E4            | 1        | 1                       | 386   | 413 |                      | N25:Deamidation (NQ):<br>0.00                                    | PEAKS<br>DB  |
| K.NPQLQDLDM(+15.99)MLTC(+57.02)VEIKEGALMLPHFNSK,A | N    | 45.78  | 3387.6335 | 29     | -0.7 | 847.9150  | 4 | 39.43 | 5        | F5:1972 | OB5934<br>H3B<br>raw.raw | 2.2084E6            | 1        | 1                       | 423   | 451 | Carbamidomethylation | M9:Oxidation (M):0.00;<br>C13:Carbamidomethyla<br>tion:1000.00   | PEAKS<br>DB  |
| R.VLLEENAGGEQEERGQRR,W                            | N    | 45.71  | 2069.0249 | 18     | 0.0  | 690.6823  | 3 | 27.83 | 2        | F2:1326 | OB5937<br>H3A<br>raw.raw | 3.3003E4            | 1        | 1                       | 335   | 352 |                      |                                                                  | PEAKS<br>DB  |
| K.VSKEHVEELTK,H                                   | Y    | 42.15  | 1297.6877 | 11     | -3.0 | 649.8492  | 2 | 26.38 | 2        | F2:1236 | OB5937<br>H3A<br>raw.raw | 0                   | 0        | 0                       | 368   | 378 |                      |                                                                  | PEAKS<br>DB  |
| K.LFEVKPKDK,N                                     | N    | 40.23  | 1102.6385 | 9      | -0.7 | 552.3262  | 2 | 29.58 | 1        | F1:1398 | OB5936<br>H3A<br>raw.raw | 0                   | 0        | 0                       | 414   | 422 |                      |                                                                  | PEAKS<br>DB  |
| G.SEEEGDITNPINLREGEPLSNNFGK,L                     | Y    | 39.45  | 2873.3315 | 26     | 2.9  | 958.7872  | 3 | 32.34 | 5        | F5:1553 | OB5934<br>H3B<br>raw.raw | 5.5034E4            | 1        | 1                       | 388   | 413 |                      |                                                                  | PEAKS<br>DB  |
| K.HADADN(+.98)ILVIQGGQATVTVANGNNRK,S              | N    | 37.99  | 2747.3950 | 26     | 2.5  | 916.8079  | 3 | 30.09 | 5        | F5:1426 | OB5934<br>H3B<br>raw.raw | 9.4717E4            | 1        | 1                       | 229   | 254 |                      | N6:Deamidation (NQ):<br>0.00                                     | PEAKS<br>DB  |

total 52 peptides



| Peptide                           | Uniq | -10lgP | Mass      | Length | ppm | m/z      | z | RT    | Fraction | Scan    | Source File              | Area Raw<br>Ara h 3 | #Feature | #Feature<br>Raw Ara h 3 | Start | End | PTM | AScore                        | Found<br>By |
|-----------------------------------|------|--------|-----------|--------|-----|----------|---|-------|----------|---------|--------------------------|---------------------|----------|-------------------------|-------|-----|-----|-------------------------------|-------------|
| K,SFN(+.98)LDEGHALRIPSGFISYILNR,H | N    | 36.85  | 2619,3445 | 23     | 8,5 | 874.1295 | 3 | 48,22 | 4        | F4:2372 | OB5925<br>H3B<br>raw.raw | 1,3134E4            | 1        | 1                       | 255   | 277 |     | N3:Deamidation (NQ):3<br>2,08 | PEAKS<br>DB |
| total 52 peptides                 |      |        |           |        |     |          |   |       |          |         |                          |                     |          |                         |       |     |     |                               |             |

sp|P43238|ALL12\_ARAHY

back to list

| [Protein Coverage](#) | [Supporting Peptides](#) |

Protein Coverage:

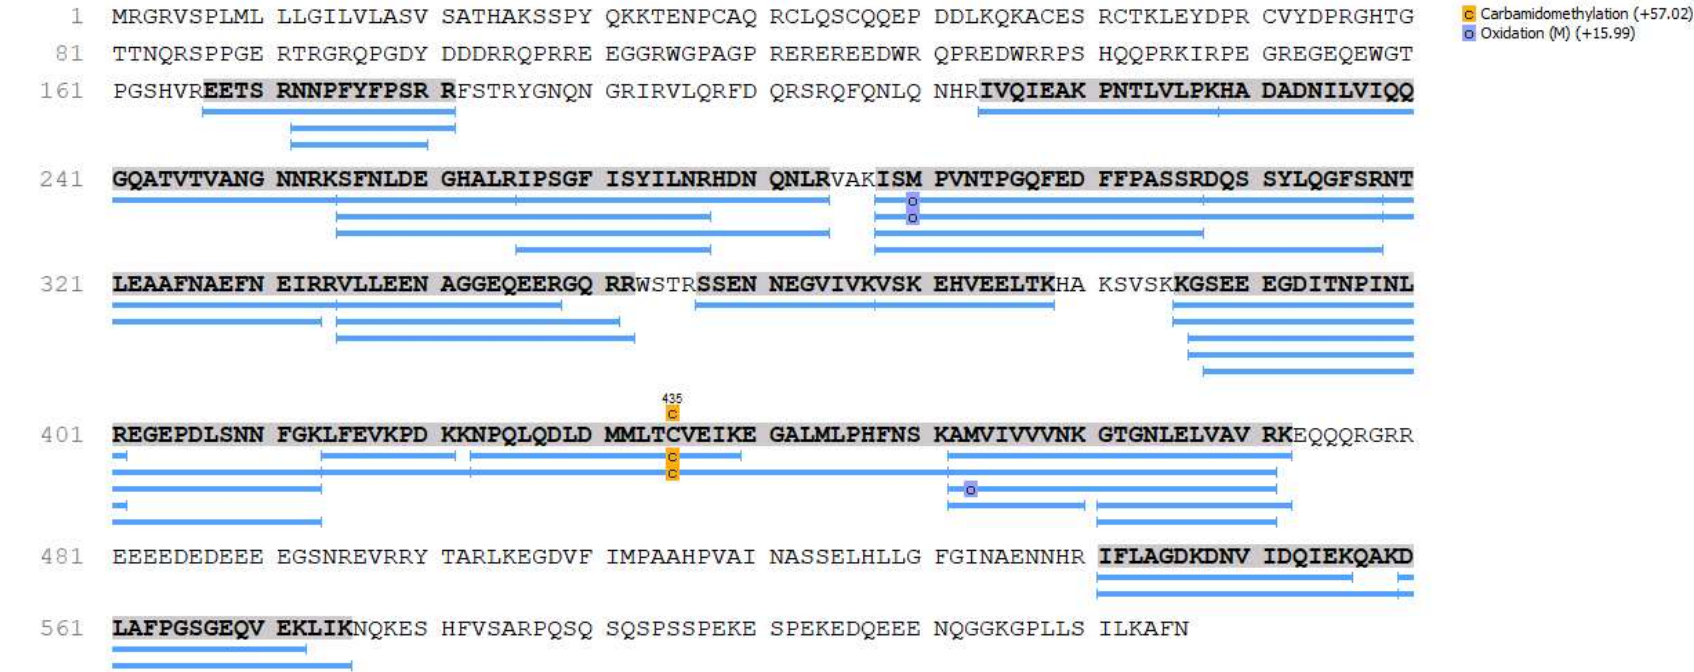

Supporting Peptides:

| Peptide                              | Uniq | -10lgP | Mass      | Length | ppm | m/z       | z | RT    | Fraction | Scan    | Source File              | Area Raw<br>Ara h 3 | #Feature | #Feature<br>Raw Ara h 3 | Start | End | PTM                  | AScore                           | Found<br>By |
|--------------------------------------|------|--------|-----------|--------|-----|-----------|---|-------|----------|---------|--------------------------|---------------------|----------|-------------------------|-------|-----|----------------------|----------------------------------|-------------|
| K.ISMPVNTPGQFEDFFPASSR,D             | N    | 164,25 | 2226,0415 | 20     | 4,6 | 1114,0332 | 2 | 35,91 | 4        | F4:1601 | OB5925<br>H3B<br>raw.raw | 7,0048E6            | 6        | 6                       | 288   | 307 |                      |                                  | PEAKS<br>DB |
| K.ISM(+15.99)PVNTPGQFEDFFPASSR,D     | N    | 159,13 | 2242,0364 | 20     | 2,3 | 1122,0281 | 2 | 34,42 | 4        | F4:1522 | OB5925<br>H3B<br>raw.raw | 1,6427E6            | 5        | 5                       | 288   | 307 | Oxidation (M)        | M3:Oxidation (M):1000,00         | PEAKS<br>DB |
| K.NPQLQDLDMMLTC(+57,02)VEIK,E        | N    | 156,27 | 2046,9788 | 17     | 2,3 | 1024,4990 | 2 | 37,39 | 5        | F5:1843 | OB5934<br>H3B<br>raw.raw | 3,0752E5            | 3        | 3                       | 423   | 439 | Carbamidomethylation | C13:Carbamidomethylation:1000,00 | PEAKS<br>DB |
| K.KGSEEEGDITNPINLREGEPLDLSNNFGK,L    | Y    | 143,03 | 3058,4478 | 28     | 1,8 | 1020,4917 | 3 | 31,22 | 5        | F5:1480 | OB5934<br>H3B<br>raw.raw | 4,8628E5            | 7        | 7                       | 386   | 413 |                      |                                  | PEAKS<br>DB |
| K.HADADNILVIQQGQATVTVAN(+.98)GNNRK,S | N    | 134,38 | 2747,3950 | 26     | 2,1 | 916,8075  | 3 | 29,70 | 2        | F2:1436 | OB5937<br>H3A<br>raw.raw | 1,18E6              | 5        | 5                       | 229   | 254 |                      | N21:Deamidation (NQ):15,73       | PEAKS<br>DB |

total 52 peptides

| Peptide                                   | Uniq | -10lgP | Mass      | Length | ppm  | m/z       | z | RT    | Fraction | Scan    | Source File              | Area Raw<br>Ara h 3 | #Feature | #Feature<br>Raw Ara h 3 | Start | End | PTM                  | AScore                           | Found<br>By |
|-------------------------------------------|------|--------|-----------|--------|------|-----------|---|-------|----------|---------|--------------------------|---------------------|----------|-------------------------|-------|-----|----------------------|----------------------------------|-------------|
| R.IFLAGDKDNVIDQIEKQAK,D                   | N    | 133.54 | 2144.1477 | 19     | 1.1  | 715.7240  | 3 | 32.93 | 5        | F5:1578 | OB5934<br>H3B<br>raw.raw | 3.7212E6            | 6        | 6                       | 541   | 559 |                      |                                  | PEAKS<br>DB |
| R.IPSGFISYILNR,H                          | N    | 131.66 | 1378.7609 | 12     | 1.8  | 690.3889  | 2 | 37.02 | 5        | F5:1820 | OB5934<br>H3B<br>raw.raw | 2.3128E7            | 6        | 6                       | 266   | 277 |                      |                                  | PEAKS<br>DB |
| K.SFNLDDEGHALRIPSGFISYILNR,H              | N    | 130.89 | 2618.3604 | 23     | 2.5  | 873.7963  | 3 | 40.61 | 4        | F4:1864 | OB5925<br>H3B<br>raw.raw | 4.4362E7            | 16       | 16                      | 255   | 277 |                      |                                  | PEAKS<br>DB |
| R.NTLEAAFAEFNEIR,R                        | N    | 130.33 | 1737.8322 | 15     | 2.0  | 869.9250  | 2 | 35.72 | 4        | F4:1599 | OB5925<br>H3B<br>raw.raw | 4.8629E5            | 2        | 2                       | 319   | 333 |                      |                                  | PEAKS<br>DB |
| R.IFLAGDKDNVIDQIEK,Q                      | N    | 122.64 | 1816.9570 | 16     | 2.7  | 909.4882  | 2 | 32.53 | 5        | F5:1557 | OB5934<br>H3B<br>raw.raw | 2.0088E7            | 12       | 12                      | 541   | 556 |                      |                                  | PEAKS<br>DB |
| K.SFNLDDEGHALR,I                          | N    | 115.46 | 1257.6101 | 11     | -0.1 | 629.8123  | 2 | 28.39 | 2        | F2:1360 | OB5937<br>H3A<br>raw.raw | 8.0983E5            | 11       | 11                      | 255   | 265 |                      |                                  | PEAKS<br>DB |
| R.DQSSYLQGFSR,N                           | N    | 113.23 | 1286.5891 | 11     | 2.4  | 644.3033  | 2 | 31.02 | 2        | F2:1506 | OB5937<br>H3A<br>raw.raw | 1.7114E6            | 5        | 5                       | 308   | 318 |                      |                                  | PEAKS<br>DB |
| K.GSEEEGDITNPINLREGEPLDLSNNFGK,L          | Y    | 109.87 | 2930.3530 | 27     | 1.6  | 977.7932  | 3 | 32.18 | 4        | F4:1388 | OB5925<br>H3B<br>raw.raw | 6.897E5             | 3        | 3                       | 387   | 413 |                      |                                  | PEAKS<br>DB |
| K.HADADNILVIQGGQATVTVANGNNRK,S            | N    | 109.04 | 2746.4111 | 26     | 1.7  | 916.4792  | 3 | 29.52 | 2        | F2:1425 | OB5937<br>H3A<br>raw.raw | 1.1363E6            | 5        | 5                       | 229   | 254 |                      |                                  | PEAKS<br>DB |
| K.AMVIVVVNKG TGNLELVAVRK,E                | N    | 105.72 | 2209.2981 | 21     | 0.6  | 737.4404  | 3 | 34.43 | 1        | F1:1679 | OB5936<br>H3A<br>raw.raw | 1.0985E7            | 7        | 7                       | 452   | 472 |                      |                                  | PEAKS<br>DB |
| R.IPSGFISYILNRHDNQNL,R                    | N    | 105.41 | 2256.1763 | 19     | 1.1  | 753.0669  | 3 | 34.19 | 2        | F2:1689 | OB5937<br>H3A<br>raw.raw | 3.796E7             | 18       | 18                      | 266   | 284 |                      |                                  | PEAKS<br>DB |
| K.KGSEEEGDITNPINLR,E                      | Y    | 103.49 | 1770.8748 | 16     | 0.6  | 886.4452  | 2 | 28.95 | 2        | F2:1396 | OB5937<br>H3A<br>raw.raw | 1.4319E5            | 11       | 11                      | 386   | 401 |                      |                                  | PEAKS<br>DB |
| K.DLAFPGSGEQVEKLI,K                       | N    | 102.68 | 1729.9249 | 16     | 1.0  | 865.9706  | 2 | 33.30 | 5        | F5:1601 | OB5934<br>H3B<br>raw.raw | 6.2551E5            | 3        | 3                       | 560   | 575 |                      |                                  | PEAKS<br>DB |
| R.VLLEENAGGEQEER,G                        | N    | 97.57  | 1571.7427 | 14     | 0.2  | 786.8788  | 2 | 27.11 | 2        | F2:1274 | OB5937<br>H3A<br>raw.raw | 1.1444E5            | 4        | 4                       | 335   | 348 |                      |                                  | PEAKS<br>DB |
| R.IVQIEAKPNTLVLPK,H                       | Y    | 92.83  | 1662.0079 | 15     | 2.0  | 832.0129  | 2 | 30.46 | 2        | F2:1476 | OB5937<br>H3A<br>raw.raw | 4.4939E6            | 12       | 12                      | 214   | 228 |                      |                                  | PEAKS<br>DB |
| R.NTLEAAFAEFNEIRR,V                       | N    | 92.46  | 1893.9332 | 16     | 2.6  | 947.9763  | 2 | 34.61 | 5        | F5:1666 | OB5934<br>H3B<br>raw.raw | 5.3025E7            | 15       | 15                      | 319   | 334 |                      |                                  | PEAKS<br>DB |
| K.AM(+15.99)VIVVVNKG TGNLELVAVR,K         | N    | 91.27  | 2097.1980 | 20     | 1.9  | 1049.6083 | 2 | 33.11 | 5        | F5:1594 | OB5934<br>H3B<br>raw.raw | 2.0031E6            | 4        | 4                       | 452   | 471 | Oxidation (M)        | M2:Oxidation (M):1000.00         | PEAKS<br>DB |
| K.NPQLQDLDMMLTC(+57.02)VEIKEGALMLPHFNSK,A | N    | 90.42  | 3371.6387 | 29     | 0.9  | 843.9177  | 4 | 38.28 | 2        | F2:1944 | OB5937<br>H3A<br>raw.raw | 7.6836E6            | 5        | 5                       | 423   | 451 | Carbamidomethylation | C13:Carbamidomethylation:1000.00 | PEAKS<br>DB |
| K.DLAFPGSGEQVEK,L                         | N    | 90.32  | 1375.6619 | 13     | 1.8  | 688.8395  | 2 | 30.46 | 2        | F2:1473 | OB5937<br>H3A<br>raw.raw | 8.5836E5            | 6        | 6                       | 560   | 572 |                      |                                  | PEAKS<br>DB |
| K.AMVIVVVNKG TGNLELVAVR,K                 | N    | 88.82  | 2081.2031 | 20     | 2.3  | 1041.6112 | 2 | 34.47 | 3        | F3:1725 | OB5938<br>H3A<br>raw.raw | 3.2769E6            | 3        | 3                       | 452   | 471 |                      |                                  | PEAKS<br>DB |
| R.NNPFYFPSRR,F                            | N    | 88.17  | 1296.6364 | 10     | 1.1  | 649.3262  | 2 | 29.14 | 3        | F3:1401 | OB5938<br>H3A<br>raw.raw | 2.2468E6            | 9        | 9                       | 172   | 181 |                      |                                  | PEAKS<br>DB |

total 52 peptides

| Peptide                                           | Uniq | -10lgP | Mass      | Length | ppm  | m/z       | z | RT    | Fraction | Scan    | Source File              | Area Raw<br>Ara h 3 | #Feature | #Feature<br>Raw Ara h 3 | Start | End | PTM                  | AScore                                                           | Found<br>By  |
|---------------------------------------------------|------|--------|-----------|--------|------|-----------|---|-------|----------|---------|--------------------------|---------------------|----------|-------------------------|-------|-----|----------------------|------------------------------------------------------------------|--------------|
| K.ISMPVNTPGQFEDFFPASSRDQSSYLQGF.SR.N              | N    | 84.22  | 3494.6201 | 31     | 2.7  | 1165.8838 | 3 | 36.29 | 4        | F4:1620 | OB5925<br>H3B<br>raw.raw | 1.0081E7            | 6        | 6                       | 288   | 318 |                      |                                                                  | PEAKS<br>DB  |
| K.HADADNIIQQGQATVTVANGNN(+.98)RK.S                | N    | 79.42  | 2747.3950 | 26     | 4.5  | 1374.7109 | 2 | 29.70 | 2        | F2:1444 | OB5937<br>H3A<br>raw.raw | 1.1778E4            | 1        | 1                       | 229   | 254 |                      | N24:Deamidation (NQ):<br>7.21                                    | PEAKS<br>DB  |
| R.SSENNEGVIVK.V                                   | Y    | 77.21  | 1174.5830 | 11     | 0.7  | 588.2992  | 2 | 23.63 | 3        | F3:1098 | OB5938<br>H3A<br>raw.raw | 1.1897E4            | 3        | 3                       | 357   | 367 |                      |                                                                  | PEAKS<br>DB  |
| K.SFNLDEGHALRIPSGFISYILNRHDNQNLR.V                | N    | 70.02  | 3495.7759 | 30     | 0.6  | 700.1629  | 5 | 38.32 | 1        | F1:1912 | OB5936<br>H3A<br>raw.raw | 2.2417E7            | 7        | 7                       | 255   | 284 |                      |                                                                  | PEAKS<br>DB  |
| R.VLLEENAGGEQEERGQR.R                             | N    | 65.63  | 1912.9238 | 17     | 0.0  | 638.6486  | 3 | 29.50 | 1        | F1:1389 | OB5936<br>H3A<br>raw.raw | 4.0372E4            | 2        | 2                       | 335   | 351 |                      |                                                                  | PEAKS<br>DB  |
| R.IFLAGDKDNVIDQ(+.98)IEKQAK.D                     | N    | 64.02  | 2145.1316 | 19     | 9.3  | 716.0578  | 3 | 32.93 | 4        | F4:1432 | OB5925<br>H3B<br>raw.raw | 1.5596E6            | 1        | 1                       | 541   | 559 |                      | Q13:Deamidation (NQ):<br>0.00                                    | PEAKS<br>DB  |
| K.GTGNLELVAVR.K                                   | N    | 62.22  | 1127.6299 | 11     | 0.1  | 564.8223  | 2 | 29.90 | 3        | F3:1460 | OB5938<br>H3A<br>raw.raw | 1.5877E5            | 3        | 3                       | 461   | 471 |                      |                                                                  | PEAKS<br>DB  |
| K.AMVIVVVK.G                                      | N    | 61.23  | 971.5837  | 9      | -0.3 | 486.7990  | 2 | 29.89 | 4        | F4:1251 | OB5925<br>H3B<br>raw.raw | 0                   | 0        | 0                       | 452   | 460 |                      |                                                                  | PEAKS<br>DB  |
| R.NNPFYF.SR.R                                     | N    | 60.62  | 1140.5352 | 9      | -0.1 | 571.2748  | 2 | 31.58 | 3        | F3:1564 | OB5938<br>H3A<br>raw.raw | 4.133E4             | 1        | 1                       | 172   | 180 |                      |                                                                  | PEAKS<br>DB  |
| K.ISM(+15.99)PVNTPGQFEDFFPASSRDQSSYLQGF.SR.N      | N    | 59.85  | 3510.6150 | 31     | 1.9  | 1171.2145 | 3 | 34.93 | 3        | F3:1753 | OB5938<br>H3A<br>raw.raw | 4.1096E6            | 6        | 6                       | 288   | 318 | Oxidation (M)        | M3:Oxidation (M):1000.<br>00                                     | PEAKS<br>DB  |
| K.HADADNIIQQGQ(+.98)ATVTVANGNNRK.S                | N    | 57.58  | 2747.3950 | 26     | 0.5  | 687.8564  | 4 | 29.52 | 3        | F3:1436 | OB5938<br>H3A<br>raw.raw | 1.466E5             | 1        | 1                       | 229   | 254 |                      | Q14:Deamidation (NQ):<br>5.77                                    | PEAKS<br>DB  |
| K.NPQLQDLDMMLTC(+57.02)VEIKEGALM(+15.99)LPHFNSK.A | N    | 54.78  | 3387.6335 | 29     | 2.9  | 847.9181  | 4 | 37.33 | 2        | F2:1882 | OB5937<br>H3A<br>raw.raw | 2.6128E6            | 2        | 2                       | 423   | 451 | Carbamidomethylation | C13:Carbamidomethylation:<br>1000.00;M22:Oxidation (M):<br>19.27 | PEAKS<br>DB  |
| R.IPSGFISYILN(+.98)RHDNQNLR.V                     | N    | 53.84  | 2257.1604 | 19     | 9.9  | 753.4015  | 3 | 37.61 | 4        | F4:1698 | OB5925<br>H3B<br>raw.raw | 2.7971E5            | 1        | 1                       | 266   | 284 |                      | N11:Deamidation (NQ):<br>33.06                                   | PEAKS<br>DB  |
| R.EETSRNPNFYF.SR.R.F                              | N    | 53.22  | 1898.9023 | 15     | -0.2 | 633.9746  | 3 | 28.39 | 3        | F3:1372 | OB5938<br>H3A<br>raw.raw | 2.391E4             | 1        | 1                       | 167   | 181 |                      |                                                                  | PEAKS<br>DB  |
| R.I(+57.02)FLAGDKDNVIDQIEK.Q                      | N    | 51.72  | 1873.9785 | 16     | 1.3  | 937.9977  | 2 | 32.56 | 4        | F4:1413 | OB5925<br>H3B<br>raw.raw | 1.5532E5            | 1        | 1                       | 541   | 556 |                      | I1:Carbamidomethylation (DHKE,<br>X@N-term):32.60                | PEAKS<br>PTM |
| K.GSEEEGDITNPINLR.E                               | Y    | 50.96  | 1642.7798 | 15     | 0.4  | 822.3975  | 2 | 32.95 | 1        | F1:1607 | OB5936<br>H3A<br>raw.raw | 7.6191E3            | 1        | 1                       | 387   | 401 |                      |                                                                  | PEAKS<br>DB  |
| K.GTGNLELVAVRK.E                                  | N    | 49.78  | 1255.7249 | 12     | 0.1  | 628.8698  | 2 | 27.83 | 2        | F2:1327 | OB5937<br>H3A<br>raw.raw | 1.327E4             | 2        | 2                       | 461   | 472 |                      |                                                                  | PEAKS<br>DB  |
| K.LFEVKPKD.K                                      | N    | 47.93  | 974.5436  | 8      | 0.9  | 488.2795  | 2 | 26.83 | 2        | F2:1264 | OB5937<br>H3A<br>raw.raw | 1.0234E3            | 1        | 1                       | 414   | 421 |                      |                                                                  | PEAKS<br>DB  |
| K.KGSEEEGDITNPINLREGEPLDLSNN(+.98)FGK.L           | Y    | 46.27  | 3059.4319 | 28     | 7.6  | 765.8711  | 4 | 31.46 | 6        | F6:1493 | OB5935<br>H3B<br>raw.raw | 3.4976E4            | 1        | 1                       | 386   | 413 |                      | N25:Deamidation (NQ):<br>0.00                                    | PEAKS<br>DB  |
| K.NPQLQDLDM(+15.99)MLTC(+57.02)VEIKEGALMLPHFNSK.A | N    | 45.78  | 3387.6335 | 29     | -0.7 | 847.9150  | 4 | 39.43 | 5        | F5:1972 | OB5934<br>H3B<br>raw.raw | 2.2084E6            | 1        | 1                       | 423   | 451 | Carbamidomethylation | M9:Oxidation (M):0.00;<br>C13:Carbamidomethylation:<br>1000.00   | PEAKS<br>DB  |
| R.VLLEENAGGEQEERGQR.W                             | N    | 45.71  | 2069.0249 | 18     | 0.0  | 690.6823  | 3 | 27.83 | 2        | F2:1326 | OB5937<br>H3A<br>raw.raw | 3.3003E4            | 1        | 1                       | 335   | 352 |                      |                                                                  | PEAKS<br>DB  |

total 52 peptides



| Peptide                              | Uniq | -10lgP | Mass      | Length | ppm  | m/z      | z | RT    | Fraction | Scan    | Source File              | Area Raw<br>Ara h 3 | #Feature | #Feature<br>Raw Ara h 3 | Start | End | PTM | AScore                        | Found<br>By |
|--------------------------------------|------|--------|-----------|--------|------|----------|---|-------|----------|---------|--------------------------|---------------------|----------|-------------------------|-------|-----|-----|-------------------------------|-------------|
| K.VSKEHVEELTK,H                      | Y    | 42.15  | 1297.6877 | 11     | -3.0 | 649.8492 | 2 | 26.38 | 2        | F2:1236 | OB5937<br>H3A<br>raw.raw | 0                   | 0        | 0                       | 368   | 378 |     |                               | PEAKS<br>DB |
| K.LFEVKPDKK.N                        | N    | 40.23  | 1102.6385 | 9      | -0.7 | 552.3262 | 2 | 29.58 | 1        | F1:1398 | OB5936<br>H3A<br>raw.raw | 0                   | 0        | 0                       | 414   | 422 |     |                               | PEAKS<br>DB |
| G.SEEEGDITNPINLREGEPDLSNNFGK,L       | Y    | 39.45  | 2873.3315 | 26     | 2.9  | 958.7872 | 3 | 32.34 | 5        | F5:1553 | OB5934<br>H3B<br>raw.raw | 5.5034E4            | 1        | 1                       | 388   | 413 |     |                               | PEAKS<br>DB |
| K.HADADN(+.98)ILVIQQGQATVTVANGNNRK,S | N    | 37.99  | 2747.3950 | 26     | 2.5  | 916.8079 | 3 | 30.09 | 5        | F5:1426 | OB5934<br>H3B<br>raw.raw | 9.4717E4            | 1        | 1                       | 229   | 254 |     | N6:Deamidation (NQ):<br>0.00  | PEAKS<br>DB |
| K.SFN(+.98)LDEGHALRIPSGFISYILNR,H    | N    | 36.85  | 2619.3445 | 23     | 8.5  | 874.1295 | 3 | 48.22 | 4        | F4:2372 | OB5925<br>H3B<br>raw.raw | 1.3134E4            | 1        | 1                       | 255   | 277 |     | N3:Deamidation (NQ):3<br>2.08 | PEAKS<br>DB |
| total 52 peptides                    |      |        |           |        |      |          |   |       |          |         |                          |                     |          |                         |       |     |     |                               |             |

Q6PSU3|Q6PSU3\_ARAHY

back to list

| [Protein Coverage](#) | [Supporting Peptides](#) |

Protein Coverage:

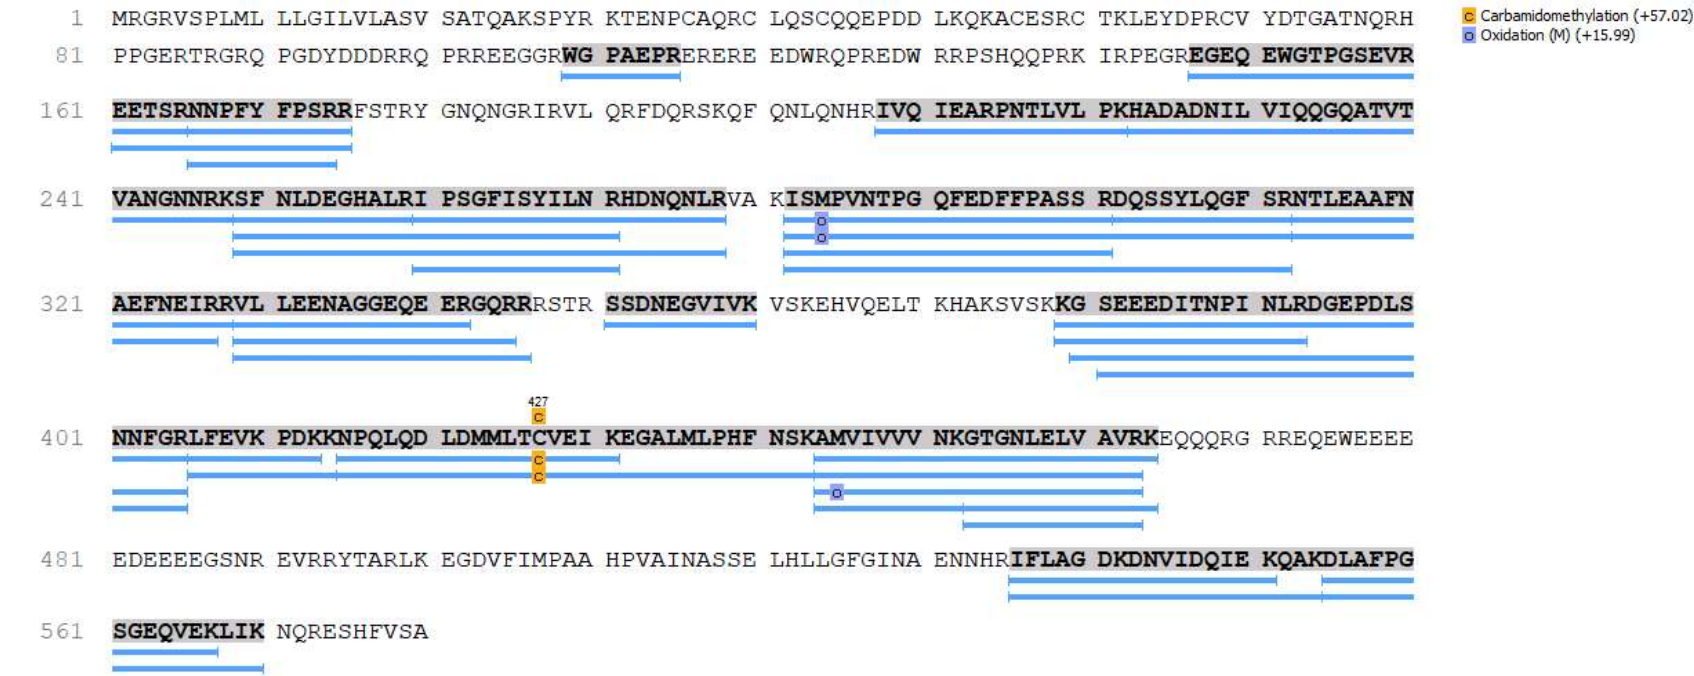

Supporting Peptides:

| Peptide                  | Uniq | -10lgP | Mass      | Length | ppm | m/z       | z | RT    | Fraction | Scan    | Source File              | Area Raw<br>Ara h 3 | #Feature | #Feature<br>Raw Ara h 3 | Start | End | PTM | AScore | Found<br>By |
|--------------------------|------|--------|-----------|--------|-----|-----------|---|-------|----------|---------|--------------------------|---------------------|----------|-------------------------|-------|-----|-----|--------|-------------|
| K.ISMPVNTPGQFEDFFPASSR,D | N    | 164.25 | 2226.0415 | 20     | 4.6 | 1114.0332 | 2 | 35.91 | 4        | F4:1601 | OB5925<br>H3B<br>raw.raw | 7.0048E6            | 6        | 6                       | 282   | 301 |     |        | PEAKS<br>DB |

total 51 peptides

| Peptide                                   | Uniq | -10lgP | Mass      | Length | ppm  | m/z       | z | RT    | Fraction | Scan    | Source File              | Area Raw<br>Ara h 3 | #Feature | #Feature<br>Raw Ara h 3 | Start | End | PTM                  | AScore                           | Found<br>By |
|-------------------------------------------|------|--------|-----------|--------|------|-----------|---|-------|----------|---------|--------------------------|---------------------|----------|-------------------------|-------|-----|----------------------|----------------------------------|-------------|
| K.ISM(+15.99)PVNTPGQFEDFFPASSR,D          | N    | 159.13 | 2242.0364 | 20     | 2.3  | 1122.0281 | 2 | 34.42 | 4        | F4:1522 | OB5925<br>H3B<br>raw.raw | 1.6427E6            | 5        | 5                       | 282   | 301 | Oxidation (M)        | M3:Oxidation (M):1000.00         | PEAKS<br>DB |
| K.NPQLQDLDMMLTC(+57.02)VEIK.E             | N    | 156.27 | 2046.9788 | 17     | 2.3  | 1024.4990 | 2 | 37.39 | 5        | F5:1843 | OB5934<br>H3B<br>raw.raw | 3.0752E5            | 3        | 3                       | 415   | 431 | Carbamidomethylation | C13:Carbamidomethylation:1000.00 | PEAKS<br>DB |
| K.HADADNILVIQQGQATVTVAN(+.98)GNNRK,S      | N    | 134.38 | 2747.3950 | 26     | 2.1  | 916.8075  | 3 | 29.70 | 2        | F2:1436 | OB5937<br>H3A<br>raw.raw | 1.18E6              | 5        | 5                       | 223   | 248 |                      | N21:Deamidation (NQ):15.73       | PEAKS<br>DB |
| R.IFLAGDKDNVIDQIEKQAK,D                   | N    | 133.54 | 2144.1477 | 19     | 1.1  | 715.7240  | 3 | 32.93 | 5        | F5:1578 | OB5934<br>H3B<br>raw.raw | 3.7212E6            | 6        | 6                       | 536   | 554 |                      |                                  | PEAKS<br>DB |
| R.IPSGFISYILNR,H                          | N    | 131.66 | 1378.7609 | 12     | 1.8  | 690.3889  | 2 | 37.02 | 5        | F5:1820 | OB5934<br>H3B<br>raw.raw | 2.3128E7            | 6        | 6                       | 260   | 271 |                      |                                  | PEAKS<br>DB |
| K.SFNLDEGHALRIPSGFISYILNR,H               | N    | 130.89 | 2618.3604 | 23     | 2.5  | 873.7963  | 3 | 40.61 | 4        | F4:1864 | OB5925<br>H3B<br>raw.raw | 4.4362E7            | 16       | 16                      | 249   | 271 |                      |                                  | PEAKS<br>DB |
| R.NTLEAAFAEFNEIR,R                        | N    | 130.33 | 1737.8322 | 15     | 2.0  | 869.9250  | 2 | 35.72 | 4        | F4:1599 | OB5925<br>H3B<br>raw.raw | 4.8629E5            | 2        | 2                       | 313   | 327 |                      |                                  | PEAKS<br>DB |
| R.IFLAGDKDNVIDQIEK,Q                      | N    | 122.64 | 1816.9570 | 16     | 2.7  | 909.4882  | 2 | 32.53 | 5        | F5:1557 | OB5934<br>H3B<br>raw.raw | 2.0088E7            | 12       | 12                      | 536   | 551 |                      |                                  | PEAKS<br>DB |
| K.SFNLDEGHALR,I                           | N    | 115.46 | 1257.6101 | 11     | -0.1 | 629.8123  | 2 | 28.39 | 2        | F2:1360 | OB5937<br>H3A<br>raw.raw | 8.0983E5            | 11       | 11                      | 249   | 259 |                      |                                  | PEAKS<br>DB |
| R.DQSSYLQGFSR,N                           | N    | 113.23 | 1286.5891 | 11     | 2.4  | 644.3033  | 2 | 31.02 | 2        | F2:1506 | OB5937<br>H3A<br>raw.raw | 1.7114E6            | 5        | 5                       | 302   | 312 |                      |                                  | PEAKS<br>DB |
| K.HADADNILVIQQGQATVTVANGNNRK,S            | N    | 109.04 | 2746.4111 | 26     | 1.7  | 916.4792  | 3 | 29.52 | 2        | F2:1425 | OB5937<br>H3A<br>raw.raw | 1.1363E6            | 5        | 5                       | 223   | 248 |                      |                                  | PEAKS<br>DB |
| K.KGSEEDITNPINLRDGEPLDNNFGR,L             | N    | 108.20 | 3015.4170 | 27     | -0.3 | 754.8613  | 4 | 31.59 | 5        | F5:1505 | OB5934<br>H3B<br>raw.raw | 6.3819E5            | 7        | 7                       | 379   | 405 |                      |                                  | PEAKS<br>DB |
| K.AMVIVVVNKG TGNLELVAVR,K                 | N    | 105.72 | 2209.2981 | 21     | 0.6  | 737.4404  | 3 | 34.43 | 1        | F1:1679 | OB5936<br>H3A<br>raw.raw | 1.0985E7            | 7        | 7                       | 444   | 464 |                      |                                  | PEAKS<br>DB |
| R.IPSGFISYILNRHDNQNL,R                    | N    | 105.41 | 2256.1763 | 19     | 1.1  | 753.0669  | 3 | 34.19 | 2        | F2:1689 | OB5937<br>H3A<br>raw.raw | 3.796E7             | 18       | 18                      | 260   | 278 |                      |                                  | PEAKS<br>DB |
| K.DLAFPGSGEQVEKLI,K                       | N    | 102.68 | 1729.9249 | 16     | 1.0  | 865.9706  | 2 | 33.30 | 5        | F5:1601 | OB5934<br>H3B<br>raw.raw | 6.2551E5            | 3        | 3                       | 555   | 570 |                      |                                  | PEAKS<br>DB |
| R.VLLEENAGGEQEER,G                        | N    | 97.57  | 1571.7427 | 14     | 0.2  | 786.8788  | 2 | 27.11 | 2        | F2:1274 | OB5937<br>H3A<br>raw.raw | 1.1444E5            | 4        | 4                       | 329   | 342 |                      |                                  | PEAKS<br>DB |
| R.NTLEAAFAEFNEIRR,V                       | N    | 92.46  | 1893.9332 | 16     | 2.6  | 947.9763  | 2 | 34.61 | 5        | F5:1666 | OB5934<br>H3B<br>raw.raw | 5.3025E7            | 15       | 15                      | 313   | 328 |                      |                                  | PEAKS<br>DB |
| K.AM(+15.99)VIVVVNKG TGNLELVAVR,K         | N    | 91.27  | 2097.1980 | 20     | 1.9  | 1049.6083 | 2 | 33.11 | 5        | F5:1594 | OB5934<br>H3B<br>raw.raw | 2.0031E6            | 4        | 4                       | 444   | 463 | Oxidation (M)        | M2:Oxidation (M):1000.00         | PEAKS<br>DB |
| K.NPQLQDLDMMLTC(+57.02)VEIKEGALMLPHFNSK,A | N    | 90.42  | 3371.6387 | 29     | 0.9  | 843.9177  | 4 | 38.28 | 2        | F2:1944 | OB5937<br>H3A<br>raw.raw | 7.6836E6            | 5        | 5                       | 415   | 443 | Carbamidomethylation | C13:Carbamidomethylation:1000.00 | PEAKS<br>DB |
| K.DLAFPGSGEQVEK,L                         | N    | 90.32  | 1375.6619 | 13     | 1.8  | 688.8395  | 2 | 30.46 | 2        | F2:1473 | OB5937<br>H3A<br>raw.raw | 8.5836E5            | 6        | 6                       | 555   | 567 |                      |                                  | PEAKS<br>DB |
| K.AMVIVVVNKG TGNLELVAVR,K                 | N    | 88.82  | 2081.2031 | 20     | 2.3  | 1041.6112 | 2 | 34.47 | 3        | F3:1725 | OB5938<br>H3A<br>raw.raw | 3.2769E6            | 3        | 3                       | 444   | 463 |                      |                                  | PEAKS<br>DB |

total 51 peptides

| Peptide                                           | Uniq | -10lgP | Mass      | Length | ppm  | m/z       | z | RT    | Fraction | Scan    | Source File              | Area Raw<br>Ara h 3 | #Feature | #Feature<br>Raw Ara h 3 | Start | End | PTM                  | AScore                                                   | Found<br>By  |
|---------------------------------------------------|------|--------|-----------|--------|------|-----------|---|-------|----------|---------|--------------------------|---------------------|----------|-------------------------|-------|-----|----------------------|----------------------------------------------------------|--------------|
| R.NNPFYFSPRR,F                                    | N    | 88.17  | 1296.6364 | 10     | 1.1  | 649.3262  | 2 | 29.14 | 3        | F3:1401 | OB5938<br>H3A<br>raw.raw | 2.2468E6            | 9        | 9                       | 166   | 175 |                      |                                                          | PEAKS<br>DB  |
| K.GSEEDITNPINLRDGEPLSNFGR,L                       | N    | 86.64  | 2887.3220 | 26     | 1.0  | 963.4489  | 3 | 32.96 | 6        | F6:1577 | OB5935<br>H3B<br>raw.raw | 4.0621E5            | 3        | 3                       | 380   | 405 |                      |                                                          | PEAKS<br>DB  |
| R.IVQIEARPNTLVLPK,H                               | Y    | 84.29  | 1690.0140 | 15     | 2.2  | 846.0161  | 2 | 30.65 | 5        | F5:1446 | OB5934<br>H3B<br>raw.raw | 5.4418E6            | 12       | 12                      | 208   | 222 |                      |                                                          | PEAKS<br>DB  |
| K.ISMPVNTPGQFEDFFPASSRDQSSYLQGFSR,N               | N    | 84.22  | 3494.6201 | 31     | 2.7  | 1165.8838 | 3 | 36.29 | 4        | F4:1620 | OB5925<br>H3B<br>raw.raw | 1.0081E7            | 6        | 6                       | 282   | 312 |                      |                                                          | PEAKS<br>DB  |
| R.SSDNEGVIVK,V                                    | N    | 81.08  | 1046.5244 | 10     | 1.8  | 524.2704  | 2 | 23.93 | 2        | F2:1106 | OB5937<br>H3A<br>raw.raw | 1.3145E4            | 3        | 3                       | 351   | 360 |                      |                                                          | PEAKS<br>DB  |
| K.HADADNIIQQGQATVTVANGNN(+.98)RK,S                | N    | 79.42  | 2747.3950 | 26     | 4.5  | 1374.7109 | 2 | 29.70 | 2        | F2:1444 | OB5937<br>H3A<br>raw.raw | 1.1778E4            | 1        | 1                       | 223   | 248 |                      | N24:Deamidation (NQ):<br>7.21                            | PEAKS<br>DB  |
| G.SEEEDITNPINLRDGEPLSNFGR,L                       | N    | 76.97  | 2830.3005 | 25     | 1.2  | 944.4419  | 3 | 32.96 | 6        | F6:1576 | OB5935<br>H3B<br>raw.raw | 5.6172E5            | 3        | 3                       | 381   | 405 |                      |                                                          | PEAKS<br>DB  |
| R.EGEQEWGTPGSEVREETSR,N                           | Y    | 74.60  | 2161.9512 | 19     | 2.0  | 721.6591  | 3 | 30.32 | 1        | F1:1445 | OB5936<br>H3A<br>raw.raw | 1.0653E5            | 3        | 3                       | 147   | 165 |                      |                                                          | PEAKS<br>DB  |
| K.SFNLDGEGHALRIPSGFISYILNRHDNQNLR,V               | N    | 70.02  | 3495.7759 | 30     | 0.6  | 700.1629  | 5 | 38.32 | 1        | F1:1912 | OB5936<br>H3A<br>raw.raw | 2.2417E7            | 7        | 7                       | 249   | 278 |                      |                                                          | PEAKS<br>DB  |
| R.VLLEENAGGEQEERGQR,R                             | N    | 65.63  | 1912.9238 | 17     | 0.0  | 638.6486  | 3 | 29.50 | 1        | F1:1389 | OB5936<br>H3A<br>raw.raw | 4.0372E4            | 2        | 2                       | 329   | 345 |                      |                                                          | PEAKS<br>DB  |
| R.IFLAGDKDNVIDQ(+.98)IEKQAK,D                     | N    | 64.02  | 2145.1316 | 19     | 9.3  | 716.0578  | 3 | 32.93 | 4        | F4:1432 | OB5925<br>H3B<br>raw.raw | 1.5596E6            | 1        | 1                       | 536   | 554 |                      | Q13:Deamidation (NQ):<br>0.00                            | PEAKS<br>DB  |
| K.GTGNLELVAVR,K                                   | N    | 62.22  | 1127.6299 | 11     | 0.1  | 564.8223  | 2 | 29.90 | 3        | F3:1460 | OB5938<br>H3A<br>raw.raw | 1.5877E5            | 3        | 3                       | 453   | 463 |                      |                                                          | PEAKS<br>DB  |
| K.AMVIVVVK,G                                      | N    | 61.23  | 971.5837  | 9      | -0.3 | 486.7990  | 2 | 29.89 | 4        | F4:1251 | OB5925<br>H3B<br>raw.raw | 0                   | 0        | 0                       | 444   | 452 |                      |                                                          | PEAKS<br>DB  |
| R.NNPFYFSPR,R                                     | N    | 60.62  | 1140.5352 | 9      | -0.1 | 571.2748  | 2 | 31.58 | 3        | F3:1564 | OB5938<br>H3A<br>raw.raw | 4.133E4             | 1        | 1                       | 166   | 174 |                      |                                                          | PEAKS<br>DB  |
| K.KGSEEDITNPINLR,D                                | N    | 60.41  | 1713.8533 | 15     | 1.6  | 857.9352  | 2 | 31.45 | 1        | F1:1515 | OB5936<br>H3A<br>raw.raw | 9.8097E3            | 1        | 1                       | 379   | 393 |                      |                                                          | PEAKS<br>DB  |
| K.ISM(+15.99)PVNTPGQFEDFFPASSRDQSSYLQGFSR,N       | N    | 59.85  | 3510.6150 | 31     | 1.9  | 1171.2145 | 3 | 34.93 | 3        | F3:1753 | OB5938<br>H3A<br>raw.raw | 4.1096E6            | 6        | 6                       | 282   | 312 | Oxidation (M)        | M3:Oxidation (M):1000.<br>00                             | PEAKS<br>DB  |
| K.HADADNIIQQGQ(+.98)ATVTVANGNNRK,S                | N    | 57.58  | 2747.3950 | 26     | 0.5  | 687.8564  | 4 | 29.52 | 3        | F3:1436 | OB5938<br>H3A<br>raw.raw | 1.466E5             | 1        | 1                       | 223   | 248 |                      | Q14:Deamidation (NQ):<br>5.77                            | PEAKS<br>DB  |
| K.NPQLQDLDMMLTC(+57.02)VEIKEGALM(+15.99)LPHFNSK,A | N    | 54.78  | 3387.6335 | 29     | 2.9  | 847.9181  | 4 | 37.33 | 2        | F2:1882 | OB5937<br>H3A<br>raw.raw | 2.6128E6            | 2        | 2                       | 415   | 443 | Carbamidomethylation | C13:Carbamidomethylation:1000,00;M22:Oxidation (M):19.27 | PEAKS<br>DB  |
| R.IPSGFISYILN(+.98)RHDNQNLR,V                     | N    | 53.84  | 2257.1604 | 19     | 9.9  | 753.4015  | 3 | 37.61 | 4        | F4:1698 | OB5925<br>H3B<br>raw.raw | 2.7971E5            | 1        | 1                       | 260   | 278 |                      | N11:Deamidation (NQ):<br>33.06                           | PEAKS<br>DB  |
| R.EETSRNNPFYFSPRR,F                               | N    | 53.22  | 1898.9023 | 15     | -0.2 | 633.9746  | 3 | 28.39 | 3        | F3:1372 | OB5938<br>H3A<br>raw.raw | 2.391E4             | 1        | 1                       | 161   | 175 |                      |                                                          | PEAKS<br>DB  |
| R.I(+57.02)FLAGDKDNVIDQIEK,Q                      | N    | 51.72  | 1873.9785 | 16     | 1.3  | 937.9977  | 2 | 32.56 | 4        | F4:1413 | OB5925<br>H3B<br>raw.raw | 1.5532E5            | 1        | 1                       | 536   | 551 |                      | I1:Carbamidomethylation (DHKE, X@N-term):3<br>2.60       | PEAKS<br>PTM |

total 51 peptides

[back to list](#)

### Protein Coverage:

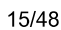

Supporting Peptides:

| Peptide                                  | Uniq | -10lgP | Mass      | Length | ppm  | m/z       | z | RT    | Fraction | Scan    | Source File              | Area Raw<br>Ara h 3 | #Feature | #Feature<br>Raw Ara h 3 | Start | End | PTM                  | AScore                           | Found<br>By |
|------------------------------------------|------|--------|-----------|--------|------|-----------|---|-------|----------|---------|--------------------------|---------------------|----------|-------------------------|-------|-----|----------------------|----------------------------------|-------------|
| K.ISMPVNTPGQFEDFFPASSR.D                 | N    | 164.25 | 2226.0415 | 20     | 4.6  | 1114.0332 | 2 | 35.91 | 4        | F4:1601 | OB5925<br>H3B<br>raw.raw | 7.0048E6            | 6        | 6                       | 282   | 301 |                      |                                  | PEAKS<br>DB |
| K.ISM(+15.99)PVNTPGQFEDFFPASSR.D         | N    | 159.13 | 2242.0364 | 20     | 2.3  | 1122.0281 | 2 | 34.42 | 4        | F4:1522 | OB5925<br>H3B<br>raw.raw | 1.6427E6            | 5        | 5                       | 282   | 301 | Oxidation (M)        | M3:Oxidation (M):1000.00         | PEAKS<br>DB |
| K.NPQLQDLDMMLTC(+57.02)VEIK.E            | N    | 156.27 | 2046.9788 | 17     | 2.3  | 1024.4990 | 2 | 37.39 | 5        | F5:1843 | OB5934<br>H3B<br>raw.raw | 3.0752E5            | 3        | 3                       | 415   | 431 | Carbamidomethylation | C13:Carbamidomethylation:1000.00 | PEAKS<br>DB |
| K.HADADNIIQQGQATVTVAN(+.98)GNNRK.S       | N    | 134.38 | 2747.3950 | 26     | 2.1  | 916.8075  | 3 | 29.70 | 2        | F2:1436 | OB5937<br>H3A<br>raw.raw | 1.18E6              | 5        | 5                       | 223   | 248 |                      | N21:Deamidation (NQ):15.73       | PEAKS<br>DB |
| R.IFLAGDKDNVIDQIEKQAK.D                  | N    | 133.54 | 2144.1477 | 19     | 1.1  | 715.7240  | 3 | 32.93 | 5        | F5:1578 | OB5934<br>H3B<br>raw.raw | 3.7212E6            | 6        | 6                       | 536   | 554 |                      |                                  | PEAKS<br>DB |
| R.IPSGFISYILNR.H                         | N    | 131.66 | 1378.7609 | 12     | 1.8  | 690.3889  | 2 | 37.02 | 5        | F5:1820 | OB5934<br>H3B<br>raw.raw | 2.3128E7            | 6        | 6                       | 260   | 271 |                      |                                  | PEAKS<br>DB |
| K.SFNLDEGHALRIPSGFISYILNR.H              | N    | 130.89 | 2618.3604 | 23     | 2.5  | 873.7963  | 3 | 40.61 | 4        | F4:1864 | OB5925<br>H3B<br>raw.raw | 4.4362E7            | 16       | 16                      | 249   | 271 |                      |                                  | PEAKS<br>DB |
| R.NTLEAAFAEFNEIR.R                       | N    | 130.33 | 1737.8322 | 15     | 2.0  | 869.9250  | 2 | 35.72 | 4        | F4:1599 | OB5925<br>H3B<br>raw.raw | 4.8629E5            | 2        | 2                       | 313   | 327 |                      |                                  | PEAKS<br>DB |
| R.IFLAGDKDNVIDQIEK.Q                     | N    | 122.64 | 1816.9570 | 16     | 2.7  | 909.4882  | 2 | 32.53 | 5        | F5:1557 | OB5934<br>H3B<br>raw.raw | 2.0088E7            | 12       | 12                      | 536   | 551 |                      |                                  | PEAKS<br>DB |
| K.SFNLDEGHALR.I                          | N    | 115.46 | 1257.6101 | 11     | -0.1 | 629.8123  | 2 | 28.39 | 2        | F2:1360 | OB5937<br>H3A<br>raw.raw | 8.0983E5            | 11       | 11                      | 249   | 259 |                      |                                  | PEAKS<br>DB |
| R.DQSSYLQGFSR.N                          | N    | 113.23 | 1286.5891 | 11     | 2.4  | 644.3033  | 2 | 31.02 | 2        | F2:1506 | OB5937<br>H3A<br>raw.raw | 1.7114E6            | 5        | 5                       | 302   | 312 |                      |                                  | PEAKS<br>DB |
| K.HADADNIIQQGQATVTVANGNNRK.S             | N    | 109.04 | 2746.4111 | 26     | 1.7  | 916.4792  | 3 | 29.52 | 2        | F2:1425 | OB5937<br>H3A<br>raw.raw | 1.1363E6            | 5        | 5                       | 223   | 248 |                      |                                  | PEAKS<br>DB |
| K.KGSEEDITNPINLRDGEPLSNNFGR.L            | N    | 108.20 | 3015.4170 | 27     | -0.3 | 754.8613  | 4 | 31.59 | 5        | F5:1505 | OB5934<br>H3B<br>raw.raw | 6.3819E5            | 7        | 7                       | 379   | 405 |                      |                                  | PEAKS<br>DB |
| K.AMVIVVNKGTGNLELVAVRK.E                 | N    | 105.72 | 2209.2981 | 21     | 0.6  | 737.4404  | 3 | 34.43 | 1        | F1:1679 | OB5936<br>H3A<br>raw.raw | 1.0985E7            | 7        | 7                       | 444   | 464 |                      |                                  | PEAKS<br>DB |
| R.IPSGFISYILNRHDNQNL.R.V                 | N    | 105.41 | 2256.1763 | 19     | 1.1  | 753.0669  | 3 | 34.19 | 2        | F2:1689 | OB5937<br>H3A<br>raw.raw | 3.796E7             | 18       | 18                      | 260   | 278 |                      |                                  | PEAKS<br>DB |
| K.DLAFIGSGEQVEKLIK.N                     | N    | 102.68 | 1729.9249 | 16     | 1.0  | 865.9706  | 2 | 33.30 | 5        | F5:1601 | OB5934<br>H3B<br>raw.raw | 6.2551E5            | 3        | 3                       | 555   | 570 |                      |                                  | PEAKS<br>DB |
| R.VLLEENAGGEQEER.G                       | N    | 97.57  | 1571.7427 | 14     | 0.2  | 786.8788  | 2 | 27.11 | 2        | F2:1274 | OB5937<br>H3A<br>raw.raw | 1.1444E5            | 4        | 4                       | 329   | 342 |                      |                                  | PEAKS<br>DB |
| R.NTLEAAFAEFNEIRR.V                      | N    | 92.46  | 1893.9332 | 16     | 2.6  | 947.9763  | 2 | 34.61 | 5        | F5:1666 | OB5934<br>H3B<br>raw.raw | 5.3025E7            | 15       | 15                      | 313   | 328 |                      |                                  | PEAKS<br>DB |
| K.AM(+15.99)VIVVNKGTGNLELVAVR.K          | N    | 91.27  | 2097.1980 | 20     | 1.9  | 1049.6083 | 2 | 33.11 | 5        | F5:1594 | OB5934<br>H3B<br>raw.raw | 2.0031E6            | 4        | 4                       | 444   | 463 | Oxidation (M)        | M2:Oxidation (M):1000.00         | PEAKS<br>DB |
| K.NPQLQDLDMMLTC(+57.02)VEIKEGALMLPHFSK.A | N    | 90.42  | 3371.6387 | 29     | 0.9  | 843.9177  | 4 | 38.28 | 2        | F2:1944 | OB5937<br>H3A<br>raw.raw | 7.6836E6            | 5        | 5                       | 415   | 443 | Carbamidomethylation | C13:Carbamidomethylation:1000.00 | PEAKS<br>DB |

total 51 peptides

| Peptide                                           | Uniq | -10lgP | Mass      | Length | ppm  | m/z       | z | RT    | Fraction | Scan    | Source File              | Area Raw<br>Ara h 3 | #Feature | #Feature<br>Raw Ara h 3 | Start | End | PTM                  | AScore                                                           | Found<br>By |
|---------------------------------------------------|------|--------|-----------|--------|------|-----------|---|-------|----------|---------|--------------------------|---------------------|----------|-------------------------|-------|-----|----------------------|------------------------------------------------------------------|-------------|
| K.DLAFIGSGEQVEK,L                                 | N    | 90.32  | 1375.6619 | 13     | 1.8  | 688.8395  | 2 | 30.46 | 2        | F2:1473 | OB5937<br>H3A<br>raw.raw | 8.5836E5            | 6        | 6                       | 555   | 567 |                      |                                                                  | PEAKS<br>DB |
| K.AMVIVVVNKG TGNLELVAVR,K                         | N    | 88.82  | 2081.2031 | 20     | 2.3  | 1041.6112 | 2 | 34.47 | 3        | F3:1725 | OB5938<br>H3A<br>raw.raw | 3.2769E6            | 3        | 3                       | 444   | 463 |                      |                                                                  | PEAKS<br>DB |
| R.NNPFYFPSRR,F                                    | N    | 88.17  | 1296.6364 | 10     | 1.1  | 649.3262  | 2 | 29.14 | 3        | F3:1401 | OB5938<br>H3A<br>raw.raw | 2.2468E6            | 9        | 9                       | 166   | 175 |                      |                                                                  | PEAKS<br>DB |
| K.GSEEDITNPINLRDGEPLDLSNNFGR,L                    | N    | 86.64  | 2887.3220 | 26     | 1.0  | 963.4489  | 3 | 32.96 | 6        | F6:1577 | OB5935<br>H3B<br>raw.raw | 4.0621E5            | 3        | 3                       | 380   | 405 |                      |                                                                  | PEAKS<br>DB |
| R.IVQIEARPNTLVLPK,H                               | Y    | 84.29  | 1690.0140 | 15     | 2.2  | 846.0161  | 2 | 30.65 | 5        | F5:1446 | OB5934<br>H3B<br>raw.raw | 5.4418E6            | 12       | 12                      | 208   | 222 |                      |                                                                  | PEAKS<br>DB |
| K.ISMPVNTPGQFEDFFPASSRDQSSYLQGFSR,N               | N    | 84.22  | 3494.6201 | 31     | 2.7  | 1165.8838 | 3 | 36.29 | 4        | F4:1620 | OB5925<br>H3B<br>raw.raw | 1.0081E7            | 6        | 6                       | 282   | 312 |                      |                                                                  | PEAKS<br>DB |
| R.SSDNEGVIVK,V                                    | N    | 81.08  | 1046.5244 | 10     | 1.8  | 524.2704  | 2 | 23.93 | 2        | F2:1106 | OB5937<br>H3A<br>raw.raw | 1.3145E4            | 3        | 3                       | 351   | 360 |                      |                                                                  | PEAKS<br>DB |
| K.HADADNILVIQQGQATVTVANGNN(+.98)RK,S              | N    | 79.42  | 2747.3950 | 26     | 4.5  | 1374.7109 | 2 | 29.70 | 2        | F2:1444 | OB5937<br>H3A<br>raw.raw | 1.1778E4            | 1        | 1                       | 223   | 248 |                      | N24:Deamidation (NQ):<br>7.21                                    | PEAKS<br>DB |
| G.SEEEDITNPINLRDGEPLDLSNNFGR,L                    | N    | 76.97  | 2830.3005 | 25     | 1.2  | 944.4419  | 3 | 32.96 | 6        | F6:1576 | OB5935<br>H3B<br>raw.raw | 5.6172E5            | 3        | 3                       | 381   | 405 |                      |                                                                  | PEAKS<br>DB |
| R.EGEQEWGTPGSEVREETSR,N                           | Y    | 74.60  | 2161.9512 | 19     | 2.0  | 721.6591  | 3 | 30.32 | 1        | F1:1445 | OB5936<br>H3A<br>raw.raw | 1.0653E5            | 3        | 3                       | 147   | 165 |                      |                                                                  | PEAKS<br>DB |
| K.SFNLDDEGHALRIPSGFISYILNRHDNQNL,R                | N    | 70.02  | 3495.7759 | 30     | 0.6  | 700.1629  | 5 | 38.32 | 1        | F1:1912 | OB5936<br>H3A<br>raw.raw | 2.2417E7            | 7        | 7                       | 249   | 278 |                      |                                                                  | PEAKS<br>DB |
| R.VLLEENAGGEQEERQGR,R                             | N    | 65.63  | 1912.9238 | 17     | 0.0  | 638.6486  | 3 | 29.50 | 1        | F1:1389 | OB5936<br>H3A<br>raw.raw | 4.0372E4            | 2        | 2                       | 329   | 345 |                      |                                                                  | PEAKS<br>DB |
| R.IFLAGDKDNVIDQ(+.98)IEKQAK,D                     | N    | 64.02  | 2145.1316 | 19     | 9.3  | 716.0578  | 3 | 32.93 | 4        | F4:1432 | OB5925<br>H3B<br>raw.raw | 1.5596E6            | 1        | 1                       | 536   | 554 |                      | Q13:Deamidation (NQ):<br>0.00                                    | PEAKS<br>DB |
| K.GTGNLELVAVR,K                                   | N    | 62.22  | 1127.6299 | 11     | 0.1  | 564.8223  | 2 | 29.90 | 3        | F3:1460 | OB5938<br>H3A<br>raw.raw | 1.5877E5            | 3        | 3                       | 453   | 463 |                      |                                                                  | PEAKS<br>DB |
| K.AMVIVVVNK,G                                     | N    | 61.23  | 971.5837  | 9      | -0.3 | 486.7990  | 2 | 29.89 | 4        | F4:1251 | OB5925<br>H3B<br>raw.raw | 0                   | 0        | 0                       | 444   | 452 |                      |                                                                  | PEAKS<br>DB |
| R.NNPFYFPSR,R                                     | N    | 60.62  | 1140.5352 | 9      | -0.1 | 571.2748  | 2 | 31.58 | 3        | F3:1564 | OB5938<br>H3A<br>raw.raw | 4.133E4             | 1        | 1                       | 166   | 174 |                      |                                                                  | PEAKS<br>DB |
| K.KGSEEDITNPINLR,D                                | N    | 60.41  | 1713.8533 | 15     | 1.6  | 857.9352  | 2 | 31.45 | 1        | F1:1515 | OB5936<br>H3A<br>raw.raw | 9.8097E3            | 1        | 1                       | 379   | 393 |                      |                                                                  | PEAKS<br>DB |
| K.ISM(+15.99)PVNTPGQFEDFFPASSRDQSSYLQGFSR,N       | N    | 59.85  | 3510.6150 | 31     | 1.9  | 1171.2145 | 3 | 34.93 | 3        | F3:1753 | OB5938<br>H3A<br>raw.raw | 4.1096E6            | 6        | 6                       | 282   | 312 | Oxidation (M)        | M3:Oxidation (M):1000.<br>00                                     | PEAKS<br>DB |
| K.HADADNILVIQQGQ(+.98)ATVTVANGNNRK,S              | N    | 57.58  | 2747.3950 | 26     | 0.5  | 687.8564  | 4 | 29.52 | 3        | F3:1436 | OB5938<br>H3A<br>raw.raw | 1.466E5             | 1        | 1                       | 223   | 248 |                      | Q14:Deamidation (NQ):<br>5.77                                    | PEAKS<br>DB |
| K.NPQLQDLDMMLTC(+57.02)VEIKEGALM(+15.99)LPHFNSK,A | N    | 54.78  | 3387.6335 | 29     | 2.9  | 847.9181  | 4 | 37.33 | 2        | F2:1882 | OB5937<br>H3A<br>raw.raw | 2.6128E6            | 2        | 2                       | 415   | 443 | Carbamidomethylation | C13:Carbamidomethylation:<br>1000.00;M22:Oxidation (M):<br>19.27 | PEAKS<br>DB |
| R.IPSGFISYILN(+.98)RHDNQNL,R                      | N    | 53.84  | 2257.1604 | 19     | 9.9  | 753.4015  | 3 | 37.61 | 4        | F4:1698 | OB5925<br>H3B<br>raw.raw | 2.7971E5            | 1        | 1                       | 260   | 278 |                      | N11:Deamidation (NQ):<br>33.06                                   | PEAKS<br>DB |

total 51 peptides



| Peptide                                           | Uniq | -10lgP | Mass      | Length | ppm  | m/z      | z | RT    | Fraction | Scan    | Source File              | Area Raw<br>Ara h 3 | #Feature | #Feature<br>Raw Ara h 3 | Start | End | PTM                  | AScore                                                     | Found<br>By  |
|---------------------------------------------------|------|--------|-----------|--------|------|----------|---|-------|----------|---------|--------------------------|---------------------|----------|-------------------------|-------|-----|----------------------|------------------------------------------------------------|--------------|
| R.EETSRNPFYFPSRR,F                                | N    | 53.22  | 1898.9023 | 15     | -0.2 | 633.9746 | 3 | 28.39 | 3        | F3:1372 | OB5938<br>H3A<br>raw.raw | 2.391E4             | 1        | 1                       | 161   | 175 |                      |                                                            | PEAKS<br>DB  |
| R.I(+57.02)FLAGDKDNVIDQIEK,Q                      | N    | 51.72  | 1873.9785 | 16     | 1.3  | 937.9977 | 2 | 32.56 | 4        | F4:1413 | OB5925<br>H3B<br>raw.raw | 1.5532E5            | 1        | 1                       | 536   | 551 |                      | I1:Carbamidomethylation (DHKE, X@N-term):3<br>2.60         | PEAKS<br>PTM |
| K.GTGNLELVAVRK,E                                  | N    | 49.78  | 1255.7249 | 12     | 0.1  | 628.8698 | 2 | 27.83 | 2        | F2:1327 | OB5937<br>H3A<br>raw.raw | 1.327E4             | 2        | 2                       | 453   | 464 |                      |                                                            | PEAKS<br>DB  |
| R.LFEVKPDK,K                                      | N    | 47.93  | 974.5436  | 8      | 0.9  | 488.2795 | 2 | 26.83 | 2        | F2:1264 | OB5937<br>H3A<br>raw.raw | 1.0234E3            | 1        | 1                       | 406   | 413 |                      |                                                            | PEAKS<br>DB  |
| K.NPQLQDLDM(+15.99)MLTC(+57.02)VEIKEGALMLPHFNSK,A | N    | 45.78  | 3387.6335 | 29     | -0.7 | 847.9150 | 4 | 39.43 | 5        | F5:1972 | OB5934<br>H3B<br>raw.raw | 2.2084E6            | 1        | 1                       | 415   | 443 | Carbamidomethylation | M9:Oxidation (M):0.00;<br>C13:Carbamidomethylation:1000.00 | PEAKS<br>DB  |
| R.VLLEENAGGEQEERGQRR,R                            | N    | 45.71  | 2069.0249 | 18     | 0.0  | 690.6823 | 3 | 27.83 | 2        | F2:1326 | OB5937<br>H3A<br>raw.raw | 3.3003E4            | 1        | 1                       | 329   | 346 |                      |                                                            | PEAKS<br>DB  |
| R.WGPAPR,E                                        | Y    | 42.35  | 811.3976  | 7      | 0.6  | 406.7063 | 2 | 26.18 | 2        | F2:1219 | OB5937<br>H3A<br>raw.raw | 9.9043E3            | 2        | 2                       | 109   | 115 |                      |                                                            | PEAKS<br>DB  |
| R.LFEVKPDKK,N                                     | N    | 40.23  | 1102.6385 | 9      | -0.7 | 552.3262 | 2 | 29.58 | 1        | F1:1398 | OB5936<br>H3A<br>raw.raw | 0                   | 0        | 0                       | 406   | 414 |                      |                                                            | PEAKS<br>DB  |
| K.HADADN(+.98)ILVIQQGQATVTVANGNNRK,S              | N    | 37.99  | 2747.3950 | 26     | 2.5  | 916.8079 | 3 | 30.09 | 5        | F5:1426 | OB5934<br>H3B<br>raw.raw | 9.4717E4            | 1        | 1                       | 223   | 248 |                      | N6:Deamidation (NQ):<br>0.00                               | PEAKS<br>DB  |
| K.SFN(+.98)LDEGHALRIPSGFISYILNR,H                 | N    | 36.85  | 2619.3445 | 23     | 8.5  | 874.1295 | 3 | 48.22 | 4        | F4:2372 | OB5925<br>H3B<br>raw.raw | 1.3134E4            | 1        | 1                       | 249   | 271 |                      | N3:Deamidation (NQ):3<br>2.08                              | PEAKS<br>DB  |
| total 51 peptides                                 |      |        |           |        |      |          |   |       |          |         |                          |                     |          |                         |       |     |                      |                                                            |              |

B3IXL2|B3IXL2\_ARAHY

[back to list](#)

| [Protein Coverage](#) | [Supporting Peptides](#) |

Protein Coverage:

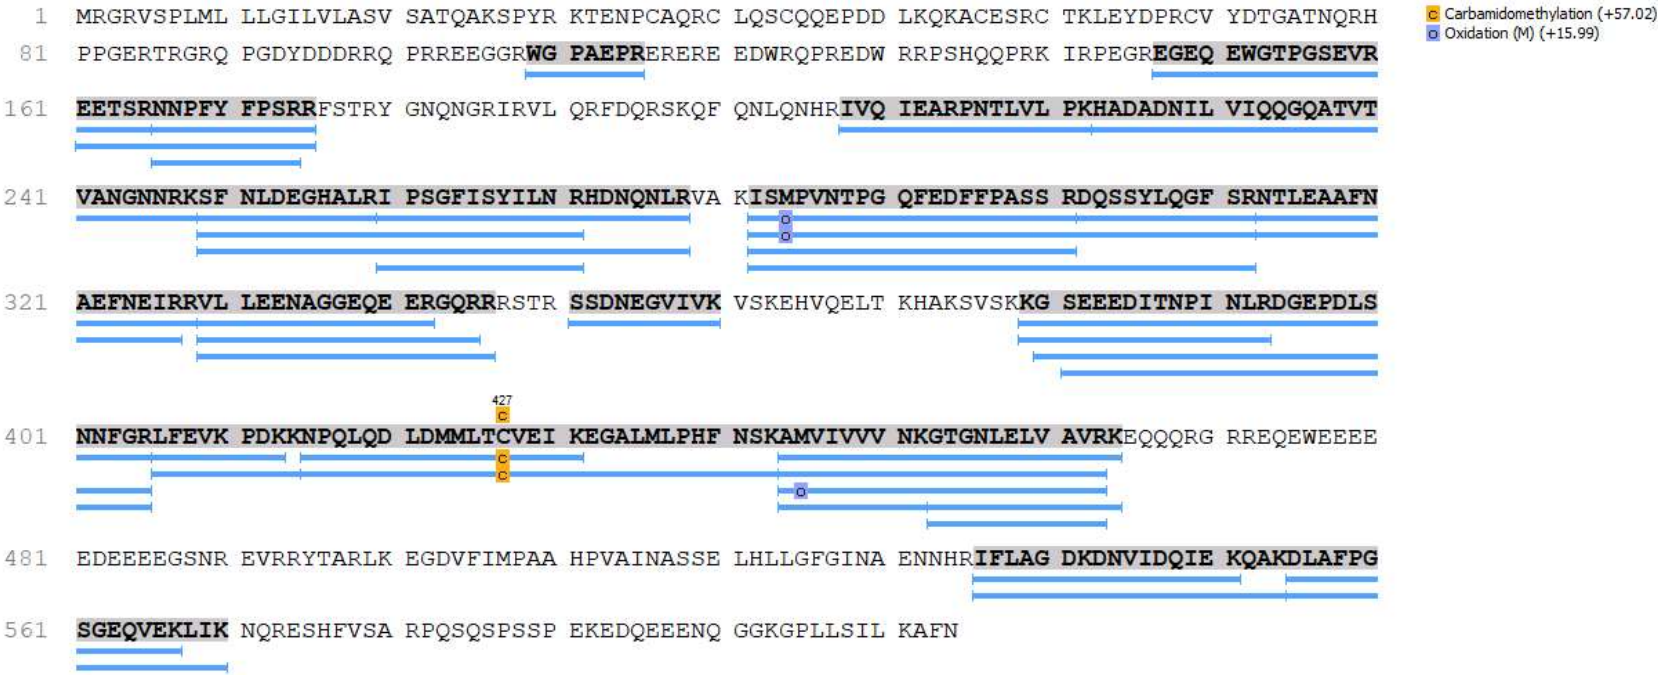

Supporting Peptides:

| Peptide                              | Uniq | -10lgP | Mass      | Length | ppm | m/z       | z | RT    | Fraction | Scan    | Source File              | Area Raw<br>Ara h 3 | #Feature | #Feature<br>Raw Ara h 3 | Start | End | PTM                  | AScore                           | Found By    |
|--------------------------------------|------|--------|-----------|--------|-----|-----------|---|-------|----------|---------|--------------------------|---------------------|----------|-------------------------|-------|-----|----------------------|----------------------------------|-------------|
| K,ISMPVNTPGQFEDFFPASSR,D             | N    | 164.25 | 2226.0415 | 20     | 4.6 | 1114.0332 | 2 | 35.91 | 4        | F4:1601 | OB5925<br>H3B<br>raw.raw | 7.0048E6            | 6        | 6                       | 282   | 301 |                      |                                  | PEAKS<br>DB |
| K,ISM(+15.99)PVNTPGQFEDFFPASSR,D     | N    | 159.13 | 2242.0364 | 20     | 2.3 | 1122.0281 | 2 | 34.42 | 4        | F4:1522 | OB5925<br>H3B<br>raw.raw | 1.6427E6            | 5        | 5                       | 282   | 301 | Oxidation (M)        | M3:Oxidation (M):1000.00         | PEAKS<br>DB |
| K,NPQLQDLDMMLTC(+57.02)VEIK,E        | N    | 156.27 | 2046.9788 | 17     | 2.3 | 1024.4990 | 2 | 37.39 | 5        | F5:1843 | OB5934<br>H3B<br>raw.raw | 3.0752E5            | 3        | 3                       | 415   | 431 | Carbamidomethylation | C13:Carbamidomethylation:1000.00 | PEAKS<br>DB |
| K,HADADNIIVIQQGQATVTVAN(+.98)GNNRK,S | N    | 134.38 | 2747.3950 | 26     | 2.1 | 916.8075  | 3 | 29.70 | 2        | F2:1436 | OB5937<br>H3A<br>raw.raw | 1.18E6              | 5        | 5                       | 223   | 248 |                      | N21:Deamidation (NQ):15.73       | PEAKS<br>DB |
| R,IFLAGDKDNVIDQIEKQAK,D              | N    | 133.54 | 2144.1477 | 19     | 1.1 | 715.7240  | 3 | 32.93 | 5        | F5:1578 | OB5934<br>H3B<br>raw.raw | 3.7212E6            | 6        | 6                       | 536   | 554 |                      |                                  | PEAKS<br>DB |
| R,IPSGFISYILNR,H                     | N    | 131.66 | 1378.7609 | 12     | 1.8 | 690.3889  | 2 | 37.02 | 5        | F5:1820 | OB5934<br>H3B<br>raw.raw | 2.3128E7            | 6        | 6                       | 260   | 271 |                      |                                  | PEAKS<br>DB |
| K,SFNLDEGHALRIPSGFISYILNR,H          | N    | 130.89 | 2618.3604 | 23     | 2.5 | 873.7963  | 3 | 40.61 | 4        | F4:1864 | OB5925<br>H3B<br>raw.raw | 4.4362E7            | 16       | 16                      | 249   | 271 |                      |                                  | PEAKS<br>DB |
| R,NTLEAAFNAEFNEIR,R                  | N    | 130.33 | 1737.8322 | 15     | 2.0 | 869.9250  | 2 | 35.72 | 4        | F4:1599 | OB5925<br>H3B<br>raw.raw | 4.8629E5            | 2        | 2                       | 313   | 327 |                      |                                  | PEAKS<br>DB |
| R,IFLAGDKDNVIDQIEK,Q                 | N    | 122.64 | 1816.9570 | 16     | 2.7 | 909.4882  | 2 | 32.53 | 5        | F5:1557 | OB5934<br>H3B<br>raw.raw | 2.0088E7            | 12       | 12                      | 536   | 551 |                      |                                  | PEAKS<br>DB |

total 51 peptides



| Peptide                                   | Uniq | -10lgP | Mass      | Length | ppm  | m/z       | z | RT    | Fraction | Scan    | Source File              | Area Raw<br>Ara h 3 | #Feature | #Feature<br>Raw Ara h 3 | Start | End | PTM                  | AScore                           | Found<br>By |
|-------------------------------------------|------|--------|-----------|--------|------|-----------|---|-------|----------|---------|--------------------------|---------------------|----------|-------------------------|-------|-----|----------------------|----------------------------------|-------------|
| K,SFNLDEGHALR,I                           | N    | 115.46 | 1257.6101 | 11     | -0.1 | 629.8123  | 2 | 28.39 | 2        | F2:1360 | OB5937<br>H3A<br>raw.raw | 8.0983E5            | 11       | 11                      | 249   | 259 |                      |                                  | PEAKS<br>DB |
| R,DQSSYLQGFSR,N                           | N    | 113.23 | 1286.5891 | 11     | 2.4  | 644.3033  | 2 | 31.02 | 2        | F2:1506 | OB5937<br>H3A<br>raw.raw | 1.7114E6            | 5        | 5                       | 302   | 312 |                      |                                  | PEAKS<br>DB |
| K,HADADNILVIQQGQATVTVANGNNRK,S            | N    | 109.04 | 2746.4111 | 26     | 1.7  | 916.4792  | 3 | 29.52 | 2        | F2:1425 | OB5937<br>H3A<br>raw.raw | 1.1363E6            | 5        | 5                       | 223   | 248 |                      |                                  | PEAKS<br>DB |
| K,KGSEEDITNPINLRDGEPLDLSNNFGR,L           | N    | 108.20 | 3015.4170 | 27     | -0.3 | 754.8613  | 4 | 31.59 | 5        | F5:1505 | OB5934<br>H3B<br>raw.raw | 6.3819E5            | 7        | 7                       | 379   | 405 |                      |                                  | PEAKS<br>DB |
| K,AMVIVVVKGTGNLELVAVRK,E                  | N    | 105.72 | 2209.2981 | 21     | 0.6  | 737.4404  | 3 | 34.43 | 1        | F1:1679 | OB5936<br>H3A<br>raw.raw | 1.0985E7            | 7        | 7                       | 444   | 464 |                      |                                  | PEAKS<br>DB |
| R,IPSGFISYILNRHDNQNL,R,V                  | N    | 105.41 | 2256.1763 | 19     | 1.1  | 753.0669  | 3 | 34.19 | 2        | F2:1689 | OB5937<br>H3A<br>raw.raw | 3.796E7             | 18       | 18                      | 260   | 278 |                      |                                  | PEAKS<br>DB |
| K,DLAFPGSGEQVEKLI,K,N                     | N    | 102.68 | 1729.9249 | 16     | 1.0  | 865.9706  | 2 | 33.30 | 5        | F5:1601 | OB5934<br>H3B<br>raw.raw | 6.2551E5            | 3        | 3                       | 555   | 570 |                      |                                  | PEAKS<br>DB |
| R,VLLEENAGGEQEER,G                        | N    | 97.57  | 1571.7427 | 14     | 0.2  | 786.8788  | 2 | 27.11 | 2        | F2:1274 | OB5937<br>H3A<br>raw.raw | 1.1444E5            | 4        | 4                       | 329   | 342 |                      |                                  | PEAKS<br>DB |
| R,NTLEAAFAEFNEIRR,V                       | N    | 92.46  | 1893.9332 | 16     | 2.6  | 947.9763  | 2 | 34.61 | 5        | F5:1666 | OB5934<br>H3B<br>raw.raw | 5.3025E7            | 15       | 15                      | 313   | 328 |                      |                                  | PEAKS<br>DB |
| K,AM(+15.99)VIVVVKGTGNLELVAVR,K           | N    | 91.27  | 2097.1980 | 20     | 1.9  | 1049.6083 | 2 | 33.11 | 5        | F5:1594 | OB5934<br>H3B<br>raw.raw | 2.0031E6            | 4        | 4                       | 444   | 463 | Oxidation (M)        | M2:Oxidation (M):1000.00         | PEAKS<br>DB |
| K,NPQLQDLDMMLTC(+57.02)VEIKEGALMLPHFNSK,A | N    | 90.42  | 3371.6387 | 29     | 0.9  | 843.9177  | 4 | 38.28 | 2        | F2:1944 | OB5937<br>H3A<br>raw.raw | 7.6836E6            | 5        | 5                       | 415   | 443 | Carbamidomethylation | C13:Carbamidomethylation:1000.00 | PEAKS<br>DB |
| K,DLAFPGSGEQVEK,L                         | N    | 90.32  | 1375.6619 | 13     | 1.8  | 688.8395  | 2 | 30.46 | 2        | F2:1473 | OB5937<br>H3A<br>raw.raw | 8.5836E5            | 6        | 6                       | 555   | 567 |                      |                                  | PEAKS<br>DB |
| K,AMVIVVVKGTGNLELVAVR,K                   | N    | 88.82  | 2081.2031 | 20     | 2.3  | 1041.6112 | 2 | 34.47 | 3        | F3:1725 | OB5938<br>H3A<br>raw.raw | 3.2769E6            | 3        | 3                       | 444   | 463 |                      |                                  | PEAKS<br>DB |
| R,NNPFYFPSRR,F                            | N    | 88.17  | 1296.6364 | 10     | 1.1  | 649.3262  | 2 | 29.14 | 3        | F3:1401 | OB5938<br>H3A<br>raw.raw | 2.2468E6            | 9        | 9                       | 166   | 175 |                      |                                  | PEAKS<br>DB |
| K,GSEEDITNPINLRDGEPLDLSNNFGR,L            | N    | 86.64  | 2887.3220 | 26     | 1.0  | 963.4489  | 3 | 32.96 | 6        | F6:1577 | OB5935<br>H3B<br>raw.raw | 4.0621E5            | 3        | 3                       | 380   | 405 |                      |                                  | PEAKS<br>DB |
| R,IVQIEARPNTLVLPK,H                       | Y    | 84.29  | 1690.0140 | 15     | 2.2  | 846.0161  | 2 | 30.65 | 5        | F5:1446 | OB5934<br>H3B<br>raw.raw | 5.4418E6            | 12       | 12                      | 208   | 222 |                      |                                  | PEAKS<br>DB |
| K,ISMPVNTPGQFEDFFPASSRDQSSYLQGFSR,N       | N    | 84.22  | 3494.6201 | 31     | 2.7  | 1165.8838 | 3 | 36.29 | 4        | F4:1620 | OB5925<br>H3B<br>raw.raw | 1.0081E7            | 6        | 6                       | 282   | 312 |                      |                                  | PEAKS<br>DB |
| R,SSDNEGVIVK,V                            | N    | 81.08  | 1046.5244 | 10     | 1.8  | 524.2704  | 2 | 23.93 | 2        | F2:1106 | OB5937<br>H3A<br>raw.raw | 1.3145E4            | 3        | 3                       | 351   | 360 |                      |                                  | PEAKS<br>DB |
| K,HADADNILVIQQGQATVTVANGNN(+.98)RK,S      | N    | 79.42  | 2747.3950 | 26     | 4.5  | 1374.7109 | 2 | 29.70 | 2        | F2:1444 | OB5937<br>H3A<br>raw.raw | 1.1778E4            | 1        | 1                       | 223   | 248 |                      | N24:Deamidation (NQ):7.21        | PEAKS<br>DB |
| G,SEEDITNPINLRDGEPLDLSNNFGR,L             | N    | 76.97  | 2830.3005 | 25     | 1.2  | 944.4419  | 3 | 32.96 | 6        | F6:1576 | OB5935<br>H3B<br>raw.raw | 5.6172E5            | 3        | 3                       | 381   | 405 |                      |                                  | PEAKS<br>DB |
| R,EGEQEWGTPGSEVREETSR,N                   | Y    | 74.60  | 2161.9512 | 19     | 2.0  | 721.6591  | 3 | 30.32 | 1        | F1:1445 | OB5936<br>H3A<br>raw.raw | 1.0653E5            | 3        | 3                       | 147   | 165 |                      |                                  | PEAKS<br>DB |

total 51 peptides

| Peptide                                           | Uniq | -10lgP | Mass      | Length | ppm  | m/z       | z | RT    | Fraction | Scan    | Source File              | Area Raw<br>Ara h 3 | #Feature | #Feature<br>Raw Ara h 3 | Start | End | PTM                  | AScore                                                           | Found<br>By  |
|---------------------------------------------------|------|--------|-----------|--------|------|-----------|---|-------|----------|---------|--------------------------|---------------------|----------|-------------------------|-------|-----|----------------------|------------------------------------------------------------------|--------------|
| K.SFNLDDEGHALRIPSGFISYILNRHDNQNL.R,V              | N    | 70.02  | 3495.7759 | 30     | 0.6  | 700.1629  | 5 | 38.32 | 1        | F1:1912 | OB5936<br>H3A<br>raw.raw | 2.2417E7            | 7        | 7                       | 249   | 278 |                      |                                                                  | PEAKS<br>DB  |
| R.VLLEENAGGEQEERQGR.R                             | N    | 65.63  | 1912.9238 | 17     | 0.0  | 638.6486  | 3 | 29.50 | 1        | F1:1389 | OB5936<br>H3A<br>raw.raw | 4.0372E4            | 2        | 2                       | 329   | 345 |                      |                                                                  | PEAKS<br>DB  |
| R.IFLAGDKDNVIDQ(+.98)IEKQAK,D                     | N    | 64.02  | 2145.1316 | 19     | 9.3  | 716.0578  | 3 | 32.93 | 4        | F4:1432 | OB5925<br>H3B<br>raw.raw | 1.5596E6            | 1        | 1                       | 536   | 554 |                      | Q13:Deamidation (NQ):<br>0.00                                    | PEAKS<br>DB  |
| K.GTGNLELVAVR,K                                   | N    | 62.22  | 1127.6299 | 11     | 0.1  | 564.8223  | 2 | 29.90 | 3        | F3:1460 | OB5938<br>H3A<br>raw.raw | 1.5877E5            | 3        | 3                       | 453   | 463 |                      |                                                                  | PEAKS<br>DB  |
| K.AMVIVVVNK,G                                     | N    | 61.23  | 971.5837  | 9      | -0.3 | 486.7990  | 2 | 29.89 | 4        | F4:1251 | OB5925<br>H3B<br>raw.raw | 0                   | 0        | 0                       | 444   | 452 |                      |                                                                  | PEAKS<br>DB  |
| R.NNPFYFPSR.R                                     | N    | 60.62  | 1140.5352 | 9      | -0.1 | 571.2748  | 2 | 31.58 | 3        | F3:1564 | OB5938<br>H3A<br>raw.raw | 4.133E4             | 1        | 1                       | 166   | 174 |                      |                                                                  | PEAKS<br>DB  |
| K.KGSEEDITNPINLR,D                                | N    | 60.41  | 1713.8533 | 15     | 1.6  | 857.9352  | 2 | 31.45 | 1        | F1:1515 | OB5936<br>H3A<br>raw.raw | 9.8097E3            | 1        | 1                       | 379   | 393 |                      |                                                                  | PEAKS<br>DB  |
| K.ISM(+15.99)PVNTPGQFEDFFPASSRDQSSYLQGF.SR,N      | N    | 59.85  | 3510.6150 | 31     | 1.9  | 1171.2145 | 3 | 34.93 | 3        | F3:1753 | OB5938<br>H3A<br>raw.raw | 4.1096E6            | 6        | 6                       | 282   | 312 | Oxidation (M)        | M3:Oxidation (M):1000.<br>00                                     | PEAKS<br>DB  |
| K.HADADNLIQGGQ(+.98)ATVTVANGNNRK,S                | N    | 57.58  | 2747.3950 | 26     | 0.5  | 687.8564  | 4 | 29.52 | 3        | F3:1436 | OB5938<br>H3A<br>raw.raw | 1.466E5             | 1        | 1                       | 223   | 248 |                      | Q14:Deamidation (NQ):<br>5.77                                    | PEAKS<br>DB  |
| K.NPQLQDLDMMLTC(+57.02)VEIKEGALM(+15.99)LPHFNSK,A | N    | 54.78  | 3387.6335 | 29     | 2.9  | 847.9181  | 4 | 37.33 | 2        | F2:1882 | OB5937<br>H3A<br>raw.raw | 2.6128E6            | 2        | 2                       | 415   | 443 | Carbamidomethylation | C13:Carbamidomethylation:<br>1000.00;M22:Oxidation (M):<br>19.27 | PEAKS<br>DB  |
| R.IPSGFISYILN(+.98)RHDNQNL.R,V                    | N    | 53.84  | 2257.1604 | 19     | 9.9  | 753.4015  | 3 | 37.61 | 4        | F4:1698 | OB5925<br>H3B<br>raw.raw | 2.7971E5            | 1        | 1                       | 260   | 278 |                      | N11:Deamidation (NQ):<br>33.06                                   | PEAKS<br>DB  |
| R.EETSRNPNPFYFPSRR,F                              | N    | 53.22  | 1898.9023 | 15     | -0.2 | 633.9746  | 3 | 28.39 | 3        | F3:1372 | OB5938<br>H3A<br>raw.raw | 2.391E4             | 1        | 1                       | 161   | 175 |                      |                                                                  | PEAKS<br>DB  |
| R.I(+57.02)FLAGDKDNVIDQIEK,Q                      | N    | 51.72  | 1873.9785 | 16     | 1.3  | 937.9977  | 2 | 32.56 | 4        | F4:1413 | OB5925<br>H3B<br>raw.raw | 1.5532E5            | 1        | 1                       | 536   | 551 |                      | I1:Carbamidomethylation (DHKE,<br>X@N-term):3<br>2.60            | PEAKS<br>PTM |
| K.GTGNLELVAVRK,E                                  | N    | 49.78  | 1255.7249 | 12     | 0.1  | 628.8698  | 2 | 27.83 | 2        | F2:1327 | OB5937<br>H3A<br>raw.raw | 1.327E4             | 2        | 2                       | 453   | 464 |                      |                                                                  | PEAKS<br>DB  |
| R.LFEVKPKD,K                                      | N    | 47.93  | 974.5436  | 8      | 0.9  | 488.2795  | 2 | 26.83 | 2        | F2:1264 | OB5937<br>H3A<br>raw.raw | 1.0234E3            | 1        | 1                       | 406   | 413 |                      |                                                                  | PEAKS<br>DB  |
| K.NPQLQDLDM(+15.99)MLTC(+57.02)VEIKEGALMLPHFNSK,A | N    | 45.78  | 3387.6335 | 29     | -0.7 | 847.9150  | 4 | 39.43 | 5        | F5:1972 | OB5934<br>H3B<br>raw.raw | 2.2084E6            | 1        | 1                       | 415   | 443 | Carbamidomethylation | M9:Oxidation (M):0.00;<br>C13:Carbamidomethylation:<br>1000.00   | PEAKS<br>DB  |
| R.VLLEENAGGEQEERQGR.R                             | N    | 45.71  | 2069.0249 | 18     | 0.0  | 690.6823  | 3 | 27.83 | 2        | F2:1326 | OB5937<br>H3A<br>raw.raw | 3.3003E4            | 1        | 1                       | 329   | 346 |                      |                                                                  | PEAKS<br>DB  |
| R.WGPAEPR,E                                       | Y    | 42.35  | 811.3976  | 7      | 0.6  | 406.7063  | 2 | 26.18 | 2        | F2:1219 | OB5937<br>H3A<br>raw.raw | 9.9043E3            | 2        | 2                       | 109   | 115 |                      |                                                                  | PEAKS<br>DB  |
| R.LFEVKPKDK,N                                     | N    | 40.23  | 1102.6385 | 9      | -0.7 | 552.3262  | 2 | 29.58 | 1        | F1:1398 | OB5936<br>H3A<br>raw.raw | 0                   | 0        | 0                       | 406   | 414 |                      |                                                                  | PEAKS<br>DB  |
| K.HADADN(+.98)ILVIQGGQATVTVANGNNRK,S              | N    | 37.99  | 2747.3950 | 26     | 2.5  | 916.8079  | 3 | 30.09 | 5        | F5:1426 | OB5934<br>H3B<br>raw.raw | 9.4717E4            | 1        | 1                       | 223   | 248 |                      | N6:Deamidation (NQ):<br>0.00                                     | PEAKS<br>DB  |
| K.SFN(+.98)LDEGHALRIPSGFISYILNR,H                 | N    | 36.85  | 2619.3445 | 23     | 8.5  | 874.1295  | 3 | 48.22 | 4        | F4:2372 | OB5925<br>H3B<br>raw.raw | 1.3134E4            | 1        | 1                       | 249   | 271 |                      | N3:Deamidation (NQ):3<br>2.08                                    | PEAKS<br>DB  |
| total 51 peptides                                 |      |        |           |        |      |           |   |       |          |         |                          |                     |          |                         |       |     |                      |                                                                  |              |

Q38711|Q38711\_ARAHY

[back to list](#)

| [Protein Coverage](#) | [Supporting Peptides](#) |

Protein Coverage:

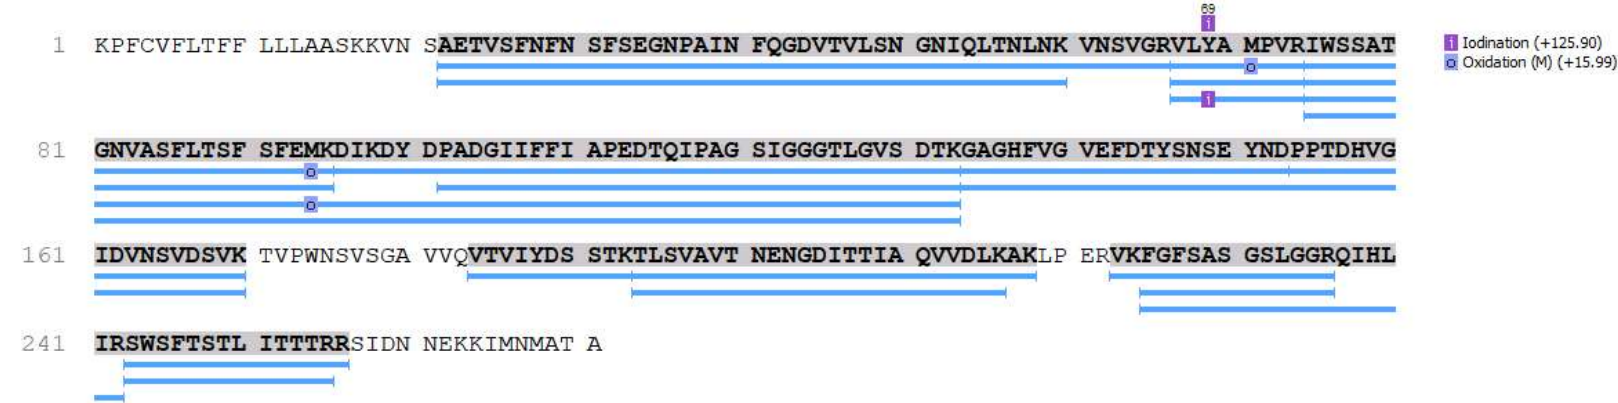

Supporting Peptides:

| Peptide                                    | Uniq | -10lgP | Mass      | Length | ppm  | m/z       | z | RT    | Fraction | Scan    | Source File        | Area Raw Ara h 3 | #Feature | #Feature Raw Ara h 3 | Start | End | PTM           | AScore                    | Found By |
|--------------------------------------------|------|--------|-----------|--------|------|-----------|---|-------|----------|---------|--------------------|------------------|----------|----------------------|-------|-----|---------------|---------------------------|----------|
| R.IWSSATGNVASFLTSFSFEMK,D                  | N    | 200.00 | 2309.1038 | 21     | 3.7  | 1155.5635 | 2 | 40.56 | 5        | F5:2025 | OB5934 H3B raw.raw | 1.0023E7         | 3        | 3                    | 75    | 95  |               |                           | PEAKS DB |
| R.SWSFTSTLITTR.R                           | N    | 140.96 | 1499.7620 | 13     | 1.8  | 750.8896  | 2 | 34.42 | 4        | F4:1520 | OB5925 H3B raw.raw | 9.5864E6         | 3        | 3                    | 243   | 255 |               |                           | PEAKS DB |
| K.DIKDYDPADGIIFFIAPEDTQIPAGSIGGGTLGVSDTK,G | N    | 140.91 | 3892.9258 | 38     | 2.7  | 1298.6527 | 3 | 39.11 | 4        | F4:1787 | OB5925 H3B raw.raw | 1.6354E7         | 5        | 5                    | 96    | 133 |               |                           | PEAKS DB |
| R.IWSSATGNVASFLTSFSFEM(+15.99)K,D          | N    | 137.48 | 2325.0986 | 21     | 1.6  | 1163.5585 | 2 | 39.06 | 5        | F5:1947 | OB5934 H3B raw.raw | 1.6326E6         | 3        | 3                    | 75    | 95  | Oxidation (M) | M20:Oxidation (M):1000.00 | PEAKS DB |
| K.TLSVAVTNENG DITTIAQVVDLK,A               | Y    | 135.88 | 2400.2747 | 23     | 2.6  | 1201.1477 | 2 | 36.27 | 5        | F5:1788 | OB5934 H3B raw.raw | 4.3282E6         | 3        | 3                    | 194   | 216 |               |                           | PEAKS DB |
| K.FGFSASGSLGGR.Q                           | N    | 125.50 | 1141.5515 | 12     | 1.4  | 571.7838  | 2 | 30.50 | 4        | F4:1278 | OB5925 H3B raw.raw | 1.5431E6         | 3        | 3                    | 225   | 236 |               |                           | PEAKS DB |
| R.VKFGFSASGSLGGR.Q                         | N    | 124.68 | 1368.7150 | 14     | 1.1  | 685.3655  | 2 | 30.27 | 5        | F5:1424 | OB5934 H3B raw.raw | 1.6529E5         | 4        | 4                    | 223   | 236 |               |                           | PEAKS DB |
| K.GAGHFVGVEFD TYSNSEYNDPPTDHVGIDVNSVDSVK,T | N    | 111.11 | 3966.7820 | 37     | 3.1  | 1323.2721 | 3 | 33.12 | 4        | F4:1445 | OB5925 H3B raw.raw | 1.9838E7         | 7        | 7                    | 134   | 170 |               |                           | PEAKS DB |
| D,PPTDHVGIDVNSVDSVK,T                      | N    | 110.01 | 1777.8846 | 17     | -0.4 | 889.9493  | 2 | 33.30 | 4        | F4:1450 | OB5925 H3B raw.raw | 1.6838E6         | 7        | 7                    | 154   | 170 |               |                           | PEAKS DB |
| R.VLYAMPVR,I                               | N    | 93.30  | 947.5262  | 8      | 2.3  | 474.7715  | 2 | 30.09 | 5        | F5:1402 | OB5934 H3B raw.raw | 9.4625E5         | 3        | 3                    | 67    | 74  |               |                           | PEAKS DB |
| K.GAGHFVGVEFD TYSNSEYND.P                  | N    | 92.68  | 2206.9080 | 20     | 2.4  | 1104.4639 | 2 | 32.91 | 5        | F5:1579 | OB5934 H3B raw.raw | 1.1587E6         | 3        | 3                    | 134   | 153 |               |                           | PEAKS DB |
| K.TLSVAVTNENG DITTIAQVVDLKAK,L             | Y    | 75.41  | 2599.4067 | 25     | 0.1  | 867.4763  | 3 | 34.79 | 5        | F5:1695 | OB5934 H3B raw.raw | 1.6993E6         | 3        | 3                    | 194   | 218 |               |                           | PEAKS DB |
| total 23 peptides                          |      |        |           |        |      |           |   |       |          |         |                    |                  |          |                      |       |     |               |                           |          |

| Peptide                                                                 | Uniq | -10lgP | Mass      | Length | ppm  | m/z       | z | RT    | Fraction | Scan    | Source File        | Area Raw Ara h 3 | #Feature | #Feature Raw Ara h 3 | Start | End | PTM           | AScore                                           | Found By  |
|-------------------------------------------------------------------------|------|--------|-----------|--------|------|-----------|---|-------|----------|---------|--------------------|------------------|----------|----------------------|-------|-----|---------------|--------------------------------------------------|-----------|
| R,SWSFTSTLITTRR,S                                                       | N    | 74.70  | 1655.8632 | 14     | 1.5  | 828.9401  | 2 | 32.96 | 6        | F6:1573 | OB5935 H3B raw.raw | 1.7686E7         | 6        | 6                    | 243   | 256 |               |                                                  | PEAKS DB  |
| K,FGFSASGSLGGRQIHLIR,S                                                  | N    | 74.68  | 1902.0223 | 18     | 0.5  | 635.0150  | 3 | 32.37 | 4        | F4:1405 | OB5925 H3B raw.raw | 2.3617E5         | 2        | 2                    | 225   | 242 |               |                                                  | PEAKS DB  |
| D,P(+57.02)PTDHVGIDVNSVDSVK,T                                           | N    | 70.75  | 1834.9061 | 17     | 0.0  | 612.6426  | 3 | 30.08 | 6        | F6:1405 | OB5935 H3B raw.raw | 0                | 0        | 0                    | 154   | 170 |               | P1:Carbamido methylation (D HKE, X@N-term):28.36 | PEAKS PTM |
| R,VLYAM(+15.99)PVR,I                                                    | N    | 61.38  | 963.5212  | 8      | -0.9 | 482.7674  | 2 | 29.11 | 5        | F5:1353 | OB5934 H3B raw.raw | 1.9715E4         | 2        | 2                    | 67    | 74  | Oxidation (M) | M5:Oxidation (M):1000.00                         | PEAKS DB  |
| D,PADGIIFFIAPEDTQIPAGSIGGGTLGVSDTK,G                                    | N    | 48.65  | 3143.6025 | 32     | 4.6  | 1572.8158 | 2 | 38.57 | 6        | F6:1906 | OB5935 H3B raw.raw | 6.2609E5         | 2        | 2                    | 102   | 133 |               |                                                  | PEAKS DB  |
| Q,VTVIYDSSTK,T                                                          | N    | 46.28  | 1111.5760 | 10     | 0.7  | 556.7957  | 2 | 26.75 | 5        | F5:1237 | OB5934 H3B raw.raw | 6.5025E2         | 1        | 1                    | 184   | 193 |               |                                                  | PEAKS DB  |
| S,AETVSFNFNSFSEGNPAINFQGDVTVLSNGNIQLTNLNVSVGR,V                         | N    | 45.30  | 4812.3740 | 45     | 5.6  | 1605.1410 | 3 | 39.31 | 6        | F6:1951 | OB5935 H3B raw.raw | 1.7542E7         | 3        | 3                    | 22    | 66  |               |                                                  | PEAKS DB  |
| R,IWSSATGNVASFLTSFSFEMKDIKDYDPADGIIFFIAPEDTQIPAGSIGGGTLGVSDTK,G         | N    | 44.58  | 6184.0190 | 59     | 6.4  | 1547.0220 | 4 | 42.84 | 5        | F5:2162 | OB5934 H3B raw.raw | 5.5947E6         | 1        | 1                    | 75    | 133 |               |                                                  | PEAKS DB  |
| R,VLY(+125.90)AMPVR,I                                                   | N    | 42.00  | 1073.4229 | 8      | 0.8  | 537.7191  | 2 | 32.78 | 6        | F6:1571 | OB5935 H3B raw.raw | 2.4073E4         | 1        | 1                    | 67    | 74  | Iodination    | Y3:Iodination: 1000,00                           | PEAKS PTM |
| R,IWSSATGNVASFLTSFSFEM(+15.99)KDIKDYDPADGIIFFIAPEDTQIPAGSIGGGTLGVSDTK,G | N    | 40.85  | 6200.0137 | 59     | 5.3  | 1551.0189 | 4 | 41.88 | 5        | F5:2118 | OB5934 H3B raw.raw | 1.2633E7         | 1        | 1                    | 75    | 133 | Oxidation (M) | M20:Oxidation (M):1000.00                        | PEAKS DB  |
| S,AETVSFNFNSFSEGNPAINFQGDVTVLSNGNIQLTNLNK,V                             | N    | 32.70  | 4200.0400 | 39     | -2.5 | 1401.0171 | 3 | 45.67 | 6        | F6:2317 | OB5935 H3B raw.raw | 0                | 0        | 0                    | 22    | 60  |               |                                                  | PEAKS DB  |
| total 23 peptides                                                       |      |        |           |        |      |           |   |       |          |         |                    |                  |          |                      |       |     |               |                                                  |           |

T2B9M0|T2B9M0\_ARAHY

[back to list](#)

[| Protein Coverage](#) | [Supporting Peptides](#) |

Protein Coverage:

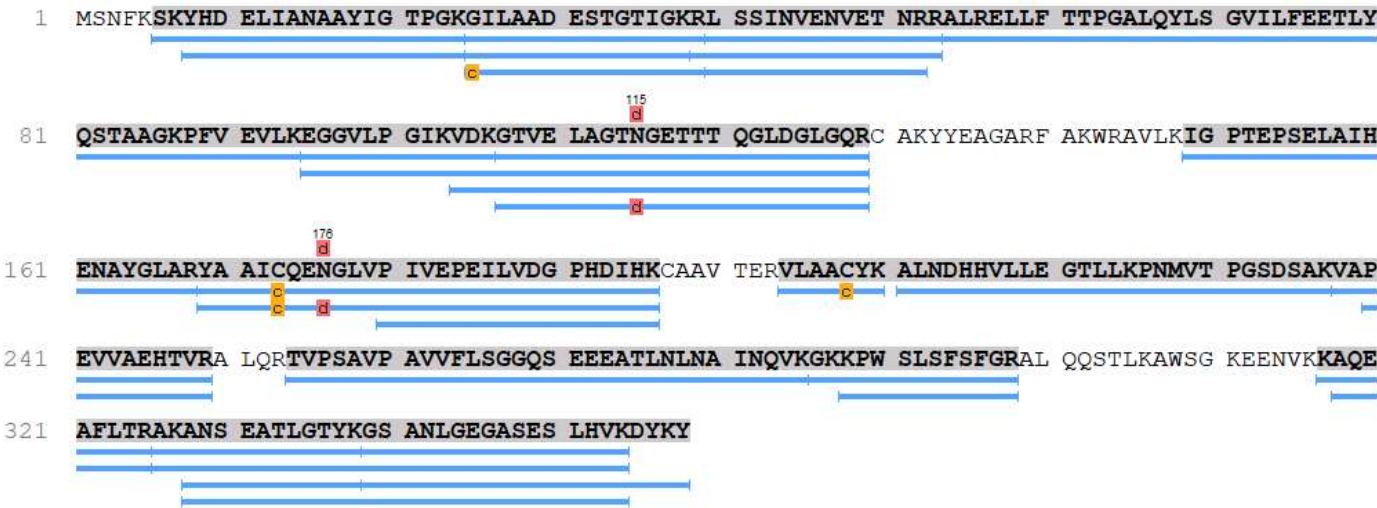

Carbamidomethylation (+57.02)  
Carbamidomethylation (DHKE, X@N-term) (+57.02)  
Deamidation (NQ) (+0.98)

Supporting Peptides:

| Peptide                                        | Uniq | -10lgP | Mass      | Length | ppm  | m/z       | z | RT    | Fraction | Scan    | Source File        | Area Raw Ara h 3 | #Feature | #Feature Raw Ara h 3 | Start | End | PTM                                    | AScore                                                      | Found By |
|------------------------------------------------|------|--------|-----------|--------|------|-----------|---|-------|----------|---------|--------------------|------------------|----------|----------------------|-------|-----|----------------------------------------|-------------------------------------------------------------|----------|
| K.GTVELAGTNGETTTQGLDGLGQR.C                    | Y    | 147.43 | 2274.1086 | 23     | 3.2  | 1138.0652 | 2 | 31.01 | 2        | F2:1514 | OB5937 H3A raw.raw | 1.1133E5         | 3        | 3                    | 107   | 129 |                                        |                                                             | PEAKS DB |
| K.GTVELAGTN(+.98)GETTTQGLDGLGQR.C              | Y    | 138.99 | 2275.0928 | 23     | 3.3  | 1138.5574 | 2 | 31.59 | 2        | F2:1543 | OB5937 H3A raw.raw | 1.6073E5         | 3        | 3                    | 107   | 129 | Deamidation (NQ)                       | N9:Deamidation (NQ):102,87                                  | PEAKS DB |
| K.IGPTEPSELAIHENAYGLAR.Y                       | Y    | 126.96 | 2137.0803 | 20     | 2.9  | 1069.5505 | 2 | 31.02 | 3        | F3:1523 | OB5938 H3A raw.raw | 8.8583E6         | 6        | 6                    | 149   | 168 |                                        |                                                             | PEAKS DB |
| K.EGGVLPGIKVDKGTVELAGTNGETTTQGLDGLGQR.C        | Y    | 125.17 | 3466.7903 | 35     | 2.3  | 1156.6067 | 3 | 32.71 | 2        | F2:1614 | OB5937 H3A raw.raw | 1.4131E6         | 3        | 3                    | 95    | 129 |                                        |                                                             | PEAKS DB |
| R.TVPSAVPAVVFLSGGQSEEEATLNLNAINQVK.G           | Y    | 122.93 | 3281.7144 | 32     | 3.4  | 1641.8700 | 2 | 37.33 | 2        | F2:1887 | OB5937 H3A raw.raw | 2.1228E7         | 9        | 9                    | 254   | 285 |                                        |                                                             | PEAKS DB |
| K.SKYHDELIANAAYIGTPGK.G                        | Y    | 121.92 | 2047.0374 | 19     | 1.6  | 683.3541  | 3 | 29.90 | 2        | F2:1442 | OB5937 H3A raw.raw | 3.3341E5         | 4        | 4                    | 6     | 24  |                                        |                                                             | PEAKS DB |
| K.VAPEVVAEHTVR.A                               | Y    | 120.72 | 1305.7041 | 12     | 0.4  | 653.8596  | 2 | 26.96 | 2        | F2:1262 | OB5937 H3A raw.raw | 3.6523E5         | 5        | 5                    | 238   | 249 |                                        |                                                             | PEAKS DB |
| K.KPWLSFSFGR.A                                 | Y    | 118.79 | 1310.6771 | 11     | 0.5  | 656.3462  | 2 | 33.46 | 2        | F2:1658 | OB5937 H3A raw.raw | 6.1097E5         | 2        | 2                    | 288   | 298 |                                        |                                                             | PEAKS DB |
| K.GILAADESTGTIGKR.L                            | Y    | 118.11 | 1487.7943 | 15     | 0.0  | 744.9044  | 2 | 27.45 | 3        | F3:1307 | OB5938 H3A raw.raw | 3.9441E5         | 4        | 4                    | 25    | 39  |                                        |                                                             | PEAKS DB |
| R.YAAIC(+57.02)QEN(+.98)GLVPIVEPEILVDGPHDIHK.C | Y    | 118.04 | 3126.5696 | 28     | 3.9  | 1043.2012 | 3 | 34.93 | 2        | F2:1744 | OB5937 H3A raw.raw | 0                | 0        | 0                    | 169   | 196 | Carbamidomethylation; Deamidation (NQ) | C5:Carbamidomethylation:100 0.00;N8:Deamidation (NQ):5 2.04 | PEAKS DB |
| K.GKKPWLSFSFGR.A                               | Y    | 114.49 | 1495.7936 | 13     | -0.2 | 499.6050  | 3 | 32.14 | 3        | F3:1581 | OB5938 H3A raw.raw | 4.526E6          | 6        | 6                    | 286   | 298 |                                        |                                                             | PEAKS DB |
| K.YHDELIANAAYIGTPGK.G                          | Y    | 113.25 | 1831.9104 | 17     | 1.7  | 916.9640  | 2 | 30.83 | 2        | F2:1510 | OB5937 H3A raw.raw | 6.0481E4         | 1        | 1                    | 8     | 24  |                                        |                                                             | PEAKS DB |

total 37 peptides

| Peptide                                  | Uniq | -10lgP | Mass      | Length | ppm  | m/z       | z | RT    | Fraction | Scan    | Source File        | Area Raw Ara h 3 | #Feature | #Feature Raw Ara h 3 | Start | End | PTM                                   | AScore                                         | Found By  |
|------------------------------------------|------|--------|-----------|--------|------|-----------|---|-------|----------|---------|--------------------|------------------|----------|----------------------|-------|-----|---------------------------------------|------------------------------------------------|-----------|
| K,ANSEATLGTYGKSANLGEASESLHVK,D           | Y    | 109.58 | 2690.3147 | 27     | 1.6  | 897.7803  | 3 | 28.95 | 2        | F2:1392 | OB5937 H3A raw.raw | 1.356E5          | 2        | 2                    | 328   | 354 |                                       |                                                | PEAKS DB  |
| R,YAAIC(+57.02)QENGLVPIVEPEILVDGPHDIHK,C | Y    | 107.85 | 3125.5854 | 28     | -2.1 | 1042.8669 | 3 | 34.56 | 3        | F3:1733 | OB5938 H3A raw.raw | 7.5947E6         | 3        | 3                    | 169   | 196 | Carbamidomethylation                  | C5:Carbamidomethylation:100 0,00               | PEAKS DB  |
| K,GILAADESTGTIGK,R                       | Y    | 102.63 | 1331.6932 | 14     | 0.1  | 666.8539  | 2 | 31.07 | 1        | F1:1493 | OB5936 H3A raw.raw | 2.8213E4         | 2        | 2                    | 25    | 38  |                                       |                                                | PEAKS DB  |
| R,LSSINVENVETNR,R                        | Y    | 101.65 | 1473.7423 | 13     | -1.0 | 737.8777  | 2 | 28.94 | 2        | F2:1383 | OB5937 H3A raw.raw | 1.8416E5         | 3        | 3                    | 40    | 52  |                                       |                                                | PEAKS DB  |
| K,VDKGTVELAGTNGETTTQGLDGLGQR,C           | Y    | 98.71  | 2616.2991 | 26     | 0.9  | 873.1078  | 3 | 29.90 | 3        | F3:1453 | OB5938 H3A raw.raw | 6.3702E4         | 2        | 2                    | 104   | 129 |                                       |                                                | PEAKS DB  |
| K,GSANLGEASESLHVKDYKY                    | Y    | 98.27  | 2124.0122 | 20     | 2.8  | 709.0133  | 3 | 31.07 | 1        | F1:1488 | OB5936 H3A raw.raw | 1.9959E6         | 6        | 6                    | 339   | 358 |                                       |                                                | PEAKS DB  |
| K,ALNDHVLLEGTLKPNMVTGPSDAK,V             | Y    | 95.79  | 2856.4802 | 27     | 0.9  | 953.1682  | 3 | 31.77 | 2        | F2:1566 | OB5937 H3A raw.raw | 2.319E5          | 1        | 1                    | 211   | 237 |                                       |                                                | PEAKS DB  |
| K,AQEAFLTR,A                             | Y    | 88.96  | 934.4872  | 8      | 0.9  | 468.2513  | 2 | 27.27 | 2        | F2:1294 | OB5937 H3A raw.raw | 1.5187E5         | 3        | 3                    | 318   | 325 |                                       |                                                | PEAKS DB  |
| K,GSANLGEASESLHVK,D                      | Y    | 84.69  | 1554.7638 | 16     | 0.0  | 778.3892  | 2 | 26.95 | 2        | F2:1269 | OB5937 H3A raw.raw | 1.9867E4         | 3        | 3                    | 339   | 354 |                                       |                                                | PEAKS DB  |
| K,ANSEATLGTYG,G                          | Y    | 79.54  | 1153.5615 | 11     | 1.6  | 577.7889  | 2 | 25.17 | 3        | F3:1176 | OB5938 H3A raw.raw | 6.2011E3         | 2        | 2                    | 328   | 338 |                                       |                                                | PEAKS DB  |
| R,AKANSEATLGTYG,G                        | Y    | 78.09  | 1352.6936 | 13     | -0.3 | 677.3539  | 2 | 27.72 | 1        | F1:1294 | OB5936 H3A raw.raw | 8.8393E3         | 3        | 3                    | 326   | 338 |                                       |                                                | PEAKS DB  |
| K,EGGVLPGIKVDK,G                         | Y    | 73.84  | 1210.6921 | 12     | -0.6 | 606.3530  | 2 | 28.38 | 2        | F2:1357 | OB5937 H3A raw.raw | 9.8645E4         | 3        | 3                    | 95    | 106 |                                       |                                                | PEAKS DB  |
| V,PIVEPEILVDGPHDIHK,C                    | Y    | 73.22  | 1907.0151 | 17     | 2.3  | 954.5170  | 2 | 34.91 | 2        | F2:1729 | OB5937 H3A raw.raw | 4.6955E6         | 2        | 2                    | 180   | 196 |                                       |                                                | PEAKS DB  |
| R,AKANSEATLGTYGKSANLGEASESLHVK,D         | Y    | 66.86  | 2889.4468 | 29     | 0.7  | 723.3695  | 4 | 28.76 | 2        | F2:1381 | OB5937 H3A raw.raw | 1.705E5          | 3        | 3                    | 326   | 354 |                                       |                                                | PEAKS DB  |
| K,KAQEAFLTR,A                            | Y    | 66.61  | 1062.5822 | 9      | 0.9  | 532.2988  | 2 | 26.54 | 3        | F3:1258 | OB5938 H3A raw.raw | 1.0907E4         | 3        | 3                    | 317   | 325 |                                       |                                                | PEAKS DB  |
| K,VDKGTVELAGTN(+.98)GETTTQGLDGLGQR,C     | Y    | 64.49  | 2617.2830 | 26     | 1.4  | 873.4362  | 3 | 32.69 | 1        | F1:1582 | OB5936 H3A raw.raw | 1.5447E5         | 1        | 1                    | 104   | 129 |                                       | N12:Deamidation (NQ):41.57                     | PEAKS DB  |
| K,VDKGTVELAGTNGETTTQ(+.98)GLDGLGQR,C     | Y    | 63.32  | 2617.2830 | 26     | 1.5  | 873.4363  | 3 | 30.46 | 2        | F2:1482 | OB5937 H3A raw.raw | 1.4142E5         | 1        | 1                    | 104   | 129 |                                       | Q18:Deamidation (NQ):0.00                      | PEAKS DB  |
| R,LSSINVENVETNRR,A                       | Y    | 58.53  | 1629.8434 | 14     | 1.7  | 544.2893  | 3 | 27.29 | 2        | F2:1293 | OB5937 H3A raw.raw | 5.2708E5         | 4        | 4                    | 40    | 53  |                                       |                                                | PEAKS DB  |
| R,VLAAC(+57.02)YK,A                      | Y    | 48.46  | 823.4262  | 7      | 1.2  | 412.7209  | 2 | 24.59 | 3        | F3:1143 | OB5938 H3A raw.raw | 8.3473E3         | 2        | 2                    | 204   | 210 | Carbamidomethylation                  | C5:Carbamidomethylation:100 0,00               | PEAKS DB  |
| K,RLSSINVENVETNRR,A                      | Y    | 47.68  | 1785.9446 | 15     | 0.4  | 596.3224  | 3 | 27.45 | 3        | F3:1317 | OB5938 H3A raw.raw | 1.6138E4         | 2        | 2                    | 39    | 53  |                                       |                                                | PEAKS DB  |
| K,G(+57.02)ILAADESTGTIGKR,L              | Y    | 47.28  | 1544.8158 | 15     | 3.9  | 773.4182  | 2 | 27.74 | 3        | F3:1329 | OB5938 H3A raw.raw | 0                | 0        | 0                    | 25    | 39  | Carbamidomethylation (DHKE, X@N-term) | G1:Carbamidomethylation (DHKE, X@N-term):61.30 | PEAKS PTM |

total 37 peptides

| Peptide                                       | Uniq | -10lgP | Mass      | Length | ppm | m/z       | z | RT    | Fraction | Scan    | Source File        | Area Raw Ara h 3 | #Feature | #Feature Raw Ara h 3 | Start | End | PTM | AScore                                          | Found By  |
|-----------------------------------------------|------|--------|-----------|--------|-----|-----------|---|-------|----------|---------|--------------------|------------------|----------|----------------------|-------|-----|-----|-------------------------------------------------|-----------|
| A,PEVVAEHTVR,A                                | Y    | 43.61  | 1135.5985 | 10     | 0.5 | 568.8068  | 2 | 27.03 | 2        | F2:1276 | OB5937 H3A raw.raw | 2.1131E3         | 1        | 1                    | 240   | 249 |     |                                                 | PEAKS DB  |
| K,V(+57.02)APEVVAEHTVR,A                      | Y    | 43.26  | 1362.7256 | 12     | 3.0 | 682.3721  | 2 | 27.40 | 2        | F2:1299 | OB5937 H3A raw.raw | 0                | 0        | 0                    | 238   | 249 |     | V1:Carbamidomethylation (DH KE, X@N-term):22.45 | PEAKS PTM |
| R,LS(-15.99)SINVENVETNRR,A                    | Y    | 36.45  | 1613.8485 | 14     | 0.0 | 538.9568  | 3 | 29.95 | 1        | F1:1425 | OB5936 H3A raw.raw | 1.6662E4         | 1        | 1                    | 40    | 53  |     | S2:Deoxy:40,00                                  | PEAKS PTM |
| R,ALRELLFTTPGALQYLSGVILFEETLYQSTAAGKPFVEVLK,E | Y    | 34.13  | 4512.4561 | 41     | 7.0 | 1129.1292 | 4 | 43.45 | 3        | F3:2247 | OB5938 H3A raw.raw | 0                | 0        | 0                    | 54    | 94  |     |                                                 | PEAKS DB  |
| total 37 peptides                             |      |        |           |        |     |           |   |       |          |         |                    |                  |          |                      |       |     |     |                                                 |           |

A0A089ZXL7|A0A089ZXL7\_ARAHY

[back to list](#)

| [Protein Coverage](#) | [Supporting Peptides](#) |

Protein Coverage:

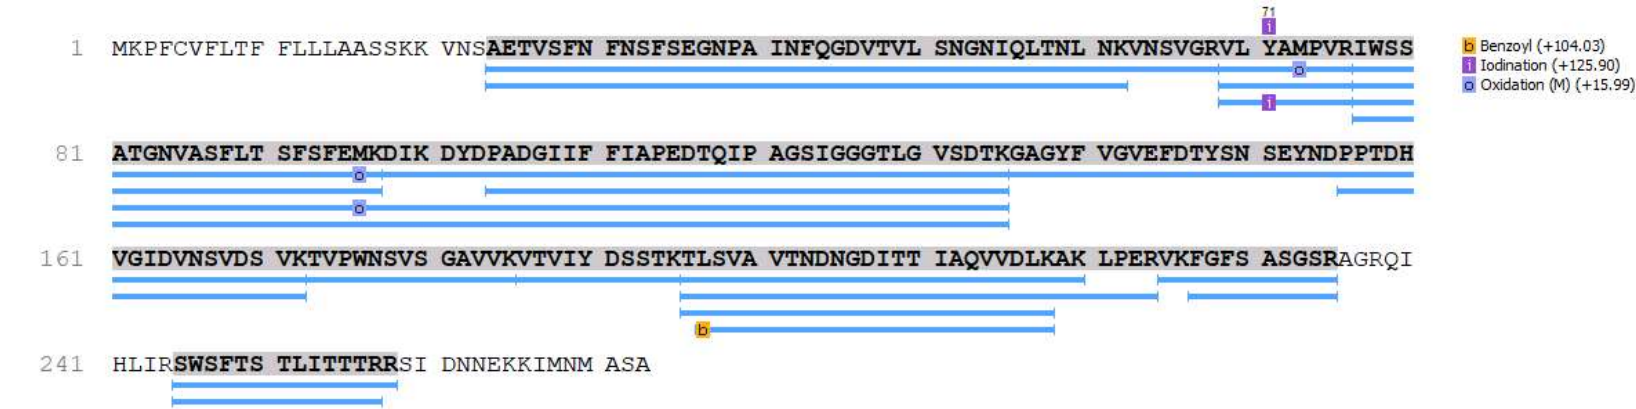

Supporting Peptides:

| Peptide                                    | Uniq | -10lgP | Mass      | Length | ppm | m/z       | z | RT    | Fraction | Scan    | Source File        | Area Raw Ara h 3 | #Feature | #Feature Raw Ara h 3 | Start | End | PTM           | AScore                    | Found By |
|--------------------------------------------|------|--------|-----------|--------|-----|-----------|---|-------|----------|---------|--------------------|------------------|----------|----------------------|-------|-----|---------------|---------------------------|----------|
| R.IWSSATGNVASFLTSFSFEMK,D                  | N    | 200.00 | 2309.1038 | 21     | 3.7 | 1155.5635 | 2 | 40.56 | 5        | F5:2025 | OB5934 H3B raw.raw | 1.0023E7         | 3        | 3                    | 77    | 97  |               |                           | PEAKS DB |
| K.TLSVAVTNDNGDITIIAQVVDLK,A                | N    | 146.70 | 2386.2590 | 23     | 2.9 | 1194.1403 | 2 | 35.91 | 4        | F4:1609 | OB5925 H3B raw.raw | 1.7984E7         | 4        | 4                    | 196   | 218 |               |                           | PEAKS DB |
| R.SWSFTSTLITTR,R                           | N    | 140.96 | 1499.7620 | 13     | 1.8 | 750.8896  | 2 | 34.42 | 4        | F4:1520 | OB5925 H3B raw.raw | 9.5864E6         | 3        | 3                    | 245   | 257 |               |                           | PEAKS DB |
| K.DIKDYDPADGIIFFIAPEDTQIPAGSIGGGTLGVSDTK,G | N    | 140.91 | 3892.9258 | 38     | 2.7 | 1298.6527 | 3 | 39.11 | 4        | F4:1787 | OB5925 H3B raw.raw | 1.6354E7         | 5        | 5                    | 98    | 135 |               |                           | PEAKS DB |
| R.IWSSATGNVASFLTSFSFEM(+15.99)K,D          | N    | 137.48 | 2325.0986 | 21     | 1.6 | 1163.5585 | 2 | 39.06 | 5        | F5:1947 | OB5934 H3B raw.raw | 1.6326E6         | 3        | 3                    | 77    | 97  | Oxidation (M) | M20:Oxidation (M):1000,00 | PEAKS DB |
| K.TVPWNSVSGAVVK,V                          | N    | 119.50 | 1342.7245 | 13     | 2.9 | 672.3715  | 2 | 31.21 | 5        | F5:1468 | OB5934 H3B raw.raw | 1.6677E6         | 3        | 3                    | 173   | 185 |               |                           | PEAKS DB |

total 26 peptides



| Peptide                                                                 | Uniq | -10lgP | Mass      | Length | ppm  | m/z       | z | RT    | Fraction | Scan    | Source File        | Area Raw Area 3 | #Feature | #Feature Raw Area 3 | Start | End | PTM           | AScore                                           | Found By  |
|-------------------------------------------------------------------------|------|--------|-----------|--------|------|-----------|---|-------|----------|---------|--------------------|-----------------|----------|---------------------|-------|-----|---------------|--------------------------------------------------|-----------|
| D.PPTDHSVGDVNSVDSVK.T                                                   | N    | 110.01 | 1777.8846 | 17     | -0.4 | 889.9493  | 2 | 33.30 | 4        | F4:1450 | OB5925 H3B raw.raw | 1.6838E6        | 7        | 7                   | 156   | 172 |               |                                                  | PEAKS DB  |
| K.TLSVAVTNDNGDITIAQVVDLKAK.L                                            | N    | 94.67  | 2585.3911 | 25     | 2.1  | 1293.7056 | 2 | 34.66 | 6        | F6:1679 | OB5935 H3B raw.raw | 8.0711E6        | 5        | 5                   | 196   | 220 |               |                                                  | PEAKS DB  |
| R.VLYAMPVR.I                                                            | N    | 93.30  | 947.5262  | 8      | 2.3  | 474.7715  | 2 | 30.09 | 5        | F5:1402 | OB5934 H3B raw.raw | 9.4625E5        | 3        | 3                   | 69    | 76  |               |                                                  | PEAKS DB  |
| K.FGFSASGSR.A                                                           | Y    | 78.76  | 914.4246  | 9      | -0.4 | 458.2194  | 2 | 27.93 | 4        | F4:1143 | OB5925 H3B raw.raw | 1.3943E4        | 3        | 3                   | 227   | 235 |               |                                                  | PEAKS DB  |
| R.SWSFTSTLITTRR.S                                                       | N    | 74.70  | 1655.8632 | 14     | 1.5  | 828.9401  | 2 | 32.96 | 6        | F6:1573 | OB5935 H3B raw.raw | 1.7686E7        | 6        | 6                   | 245   | 258 |               |                                                  | PEAKS DB  |
| D.P(+57.02)PTDHSVGDVNSVDSVK.T                                           | N    | 70.75  | 1834.9061 | 17     | 0.0  | 612.6426  | 3 | 30.08 | 6        | F6:1405 | OB5935 H3B raw.raw | 0               | 0        | 0                   | 156   | 172 |               | P1:Carbamido methylation (D HKE, X@N-term):28.36 | PEAKS PTM |
| R.VLYAM(+15.99)PVR.I                                                    | N    | 61.38  | 963.5212  | 8      | -0.9 | 482.7674  | 2 | 29.11 | 5        | F5:1353 | OB5934 H3B raw.raw | 1.9715E4        | 2        | 2                   | 69    | 76  | Oxidation (M) | M5:Oxidation (M):1000.00                         | PEAKS DB  |
| K.GAGYFVGVEFDTSYNSSEYNDPPTDHSVGDVNSVDSVK.T                              | Y    | 54.24  | 3992.7864 | 37     | 2.7  | 1331.9397 | 3 | 37.42 | 4        | F4:1595 | OB5925 H3B raw.raw | 4.597E5         | 1        | 1                   | 136   | 172 |               |                                                  | PEAKS DB  |
| R.VKFGFSASGSR.A                                                         | Y    | 49.56  | 1141.5880 | 11     | -0.8 | 571.8008  | 2 | 29.33 | 6        | F6:1359 | OB5935 H3B raw.raw | 1.1968E3        | 1        | 1                   | 225   | 235 |               |                                                  | PEAKS DB  |
| D.PADGIIFFIAPEDTQIPAGSIGGGTLGVSDTK.G                                    | N    | 48.65  | 3143.6025 | 32     | 4.6  | 1572.8158 | 2 | 38.57 | 6        | F6:1906 | OB5935 H3B raw.raw | 6.2609E5        | 2        | 2                   | 104   | 135 |               |                                                  | PEAKS DB  |
| K.VTVIYDSSTK.T                                                          | N    | 46.28  | 1111.5760 | 10     | 0.7  | 556.7957  | 2 | 26.75 | 5        | F5:1237 | OB5934 H3B raw.raw | 6.5025E2        | 1        | 1                   | 186   | 195 |               |                                                  | PEAKS DB  |
| S.AETVSFNFSFSEGNPAINFQGDVTVLSNGNIQLTNLKVNSVGR.V                         | N    | 45.30  | 4812.3740 | 45     | 5.6  | 1605.1410 | 3 | 39.31 | 6        | F6:1951 | OB5935 H3B raw.raw | 1.7542E7        | 3        | 3                   | 24    | 68  |               |                                                  | PEAKS DB  |
| R.IWSSATGNVASFLTSFSFEMKDIKDYDPADGIIFFIAPEDTQIPAGSIGGGTLGVSDTK.G         | N    | 44.58  | 6184.0190 | 59     | 6.4  | 1547.0220 | 4 | 42.84 | 5        | F5:2162 | OB5934 H3B raw.raw | 5.5947E6        | 1        | 1                   | 77    | 135 |               |                                                  | PEAKS DB  |
| R.VLY(+125.90)AMPVR.I                                                   | N    | 42.00  | 1073.4229 | 8      | 0.8  | 537.7191  | 2 | 32.78 | 6        | F6:1571 | OB5935 H3B raw.raw | 2.4073E4        | 1        | 1                   | 69    | 76  | Iodination    | Y3:Iodination: 1000.00                           | PEAKS PTM |
| R.IWSSATGNVASFLTSFSFEM(+15.99)KDIKDYDPADGIIFFIAPEDTQIPAGSIGGGTLGVSDTK.G | N    | 40.85  | 6200.0137 | 59     | 5.3  | 1551.0189 | 4 | 41.88 | 5        | F5:2118 | OB5934 H3B raw.raw | 1.2633E7        | 1        | 1                   | 77    | 135 | Oxidation (M) | M20:Oxidation (M):1000.00                        | PEAKS DB  |
| K.TLSVAVTNDNGDITIAQVVDLKAKLPER.V                                        | N    | 39.09  | 3080.6716 | 29     | 2.1  | 771.1768  | 4 | 36.14 | 6        | F6:1745 | OB5935 H3B raw.raw | 1.01E6          | 1        | 1                   | 196   | 224 |               |                                                  | PEAKS DB  |
| T.L(+104.03)SVAVTNDNGDITIAQVVDLK.A                                      | N    | 38.94  | 2389.2375 | 22     | 9.4  | 1195.6373 | 2 | 36.47 | 4        | F4:1654 | OB5925 H3B raw.raw | 1.2686E5        | 1        | 1                   | 197   | 218 | Benzoyl       | L1:Benzoyle:12 4.10                              | PEAKS PTM |
| K.TLSVAVTNDN(+.98)GDITIAQVVDLKAKLPER.V                                  | N    | 38.41  | 3081.6558 | 29     | 8.0  | 771.4274  | 4 | 35.96 | 6        | F6:1745 | OB5935 H3B raw.raw | 2.6837E5        | 1        | 1                   | 196   | 224 |               | N10:Deamidation (NQ):14.04                       | PEAKS DB  |
| K.GAGYFVGVEFDTSYNSSEYNDPPTDHSVGDVN(+.98)SVDSVK.T                        | Y    | 35.37  | 3993.7703 | 37     | 3.8  | 1332.2690 | 3 | 48.53 | 5        | F5:2486 | OB5934 H3B raw.raw | 1.7305E3        | 1        | 1                   | 136   | 172 |               | N31:Deamidation (NQ):10.83                       | PEAKS DB  |
| S.AETVSFNFSFSEGNPAINFQGDVTVLSNGNIQLTNLKV.V                              | N    | 32.70  | 4200.0400 | 39     | -2.5 | 1401.0171 | 3 | 45.67 | 6        | F6:2317 | OB5935 H3B raw.raw | 0               | 0        | 0                   | 24    | 62  |               |                                                  | PEAKS DB  |
| total 26 peptides                                                       |      |        |           |        |      |           |   |       |          |         |                    |                 |          |                     |       |     |               |                                                  |           |



[Protein Coverage](#) | [Supporting Peptides](#) |

Protein Coverage:

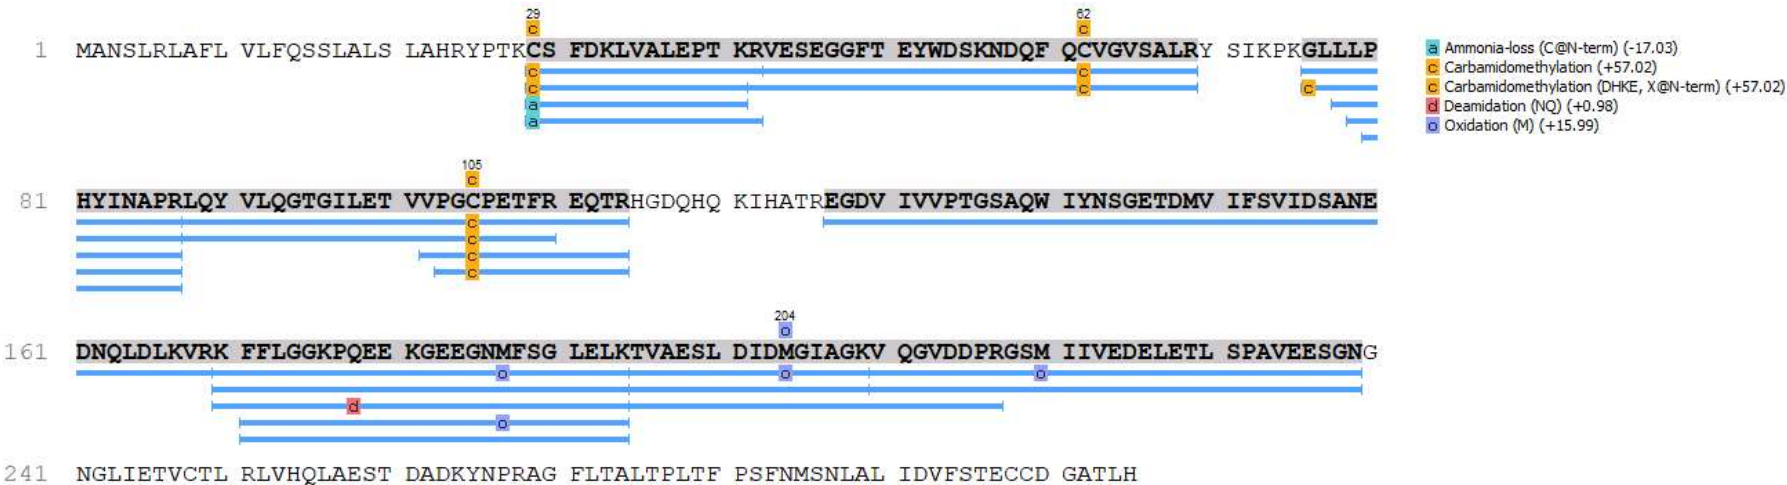

Supporting Peptides:

| Peptide                                 | Uniq | -10lgP | Mass      | Length | ppm | m/z       | z | RT    | Fraction | Scan    | Source File        | Area Raw Ara h 3 | #Feature | #Feature Raw Ara h 3 | Start | End | PTM                  | AScore                           | Found By |
|-----------------------------------------|------|--------|-----------|--------|-----|-----------|---|-------|----------|---------|--------------------|------------------|----------|----------------------|-------|-----|----------------------|----------------------------------|----------|
| K.FFLGGKPQEEKGEEGNMFSGLELK.T            | N    | 162.92 | 2670.2998 | 24     | 2.4 | 891.1094  | 3 | 34.78 | 4        | F4:1553 | OB5925 H3B raw.raw | 1.858E7          | 6        | 6                    | 171   | 194 |                      |                                  | PEAKS DB |
| R.VESEGGFTEYWSKNDQFQC(+57.02)VGVSALR.Y  | Y    | 145.04 | 3107.3931 | 27     | 3.3 | 1036.8083 | 3 | 34.05 | 4        | F4:1498 | OB5925 H3B raw.raw | 5.0527E6         | 4        | 4                    | 43    | 69  | Carbamidomethylation | C20:Carbamidomethylation:1000.00 | PEAKS DB |
| K.TVAESLDIDMGIAGK.V                     | Y    | 137.21 | 1518.7599 | 15     | 2.3 | 760.3890  | 2 | 33.12 | 4        | F4:1443 | OB5925 H3B raw.raw | 5.1238E6         | 3        | 3                    | 195   | 209 |                      |                                  | PEAKS DB |
| R.LQYVLQGTGILETVVPGC(+57.02)PETFR.E     | Y    | 137.04 | 2576.3308 | 23     | 3.4 | 1289.1770 | 2 | 36.84 | 5        | F5:1810 | OB5934 H3B raw.raw | 1.1189E6         | 3        | 3                    | 88    | 110 | Carbamidomethylation | C18:Carbamidomethylation:1000.00 | PEAKS DB |
| K.RVESEGGFTEYWSKNDQFQC(+57.02)VGVSALR.Y | Y    | 136.17 | 3263.4941 | 28     | 3.1 | 1088.8420 | 3 | 33.12 | 4        | F4:1439 | OB5925 H3B raw.raw | 7.9145E5         | 5        | 5                    | 42    | 69  | Carbamidomethylation | C21:Carbamidomethylation:1000.00 | PEAKS DB |
| K.GLLLPHYINAPR.L                        | Y    | 122.78 | 1362.7771 | 12     | 0.3 | 682.3960  | 2 | 31.41 | 5        | F5:1486 | OB5934 H3B raw.raw | 8.3765E6         | 6        | 6                    | 76    | 87  |                      |                                  | PEAKS DB |
| R.KFFLGGKPQEEKGEEGNMFSGLELK.T           | N    | 122.64 | 2798.3948 | 25     | 2.1 | 933.8075  | 3 | 34.42 | 4        | F4:1518 | OB5925 H3B raw.raw | 1.4026E7         | 9        | 9                    | 170   | 194 |                      |                                  | PEAKS DB |
| R.LQYVLQGTGILETVVPGC(+57.02)PETFREQTR.H | Y    | 118.53 | 3090.5808 | 27     | 3.1 | 1031.2041 | 3 | 35.35 | 4        | F4:1702 | OB5925 H3B raw.raw | 5.1222E7         | 15       | 15                   | 88    | 114 | Carbamidomethylation | C18:Carbamidomethylation:1000.00 | PEAKS DB |
| K.C(+57.02)SFDKLVALEPTK.R               | Y    | 111.77 | 1506.7751 | 13     | 1.5 | 754.3960  | 2 | 31.13 | 5        | F5:1476 | OB5934 H3B raw.raw | 1.4434E5         | 4        | 4                    | 29    | 41  | Carbamidomethylation | C1:Carbamidomethylation:1000.00  | PEAKS DB |
| K.C(+57.02)SFDKLVALEPTK.V               | Y    | 103.22 | 1662.8762 | 14     | 1.5 | 555.3002  | 3 | 30.69 | 4        | F4:1301 | OB5925 H3B raw.raw | 5.6961E4         | 1        | 1                    | 29    | 42  | Carbamidomethylation | C1:Carbamidomethylation:1000.00  | PEAKS DB |
| K.FFLGGKPQEEKGEEGNM(+15.99)FSGLELK.T    | N    | 102.01 | 2686.2947 | 24     | 1.7 | 896.4404  | 3 | 32.74 | 4        | F4:1411 | OB5925 H3B raw.raw | 2.6867E6         | 4        | 4                    | 171   | 194 | Oxidation (M)        | M17:Oxidation (M):1000.00        | PEAKS DB |

total 27 peptides

| Peptide                                        | Uniq | -10lgP | Mass      | Length | ppm  | m/z       | z | RT    | Fraction | Scan    | Source File        | Area Raw Ara h 3 | #Feature | #Feature Raw Ara h 3 | Start | End | PTM                                   | AScore                                                                            | Found By  |
|------------------------------------------------|------|--------|-----------|--------|------|-----------|---|-------|----------|---------|--------------------|------------------|----------|----------------------|-------|-----|---------------------------------------|-----------------------------------------------------------------------------------|-----------|
| R,KFFLGKPKQEEKGEEGNM(+15.99)FSGLELK.T          | N    | 101.19 | 2814.3896 | 25     | 0.9  | 704.6053  | 4 | 32.34 | 5        | F5:1545 | OB5934 H3B raw.raw | 1.3174E6         | 4        | 4                    | 170   | 194 | Oxidation (M)                         | M18:Oxidation (M):1000.00                                                         | PEAKS DB  |
| K,TVAESLDIDM(+15.99)GIAGK.V                    | Y    | 99.20  | 1534.7549 | 15     | 2.8  | 768.3869  | 2 | 30.87 | 4        | F4:1309 | OB5925 H3B raw.raw | 5.2987E4         | 2        | 2                    | 195   | 209 | Oxidation (M)                         | M10:Oxidation (M):1000.00                                                         | PEAKS DB  |
| R,EGDVIVPTGSAQWIYNSGETDMVIFSVIDSANEDNQLDLKVR,K | Y    | 92.51  | 4723.2964 | 43     | 3.8  | 1575.4454 | 3 | 41.12 | 5        | F5:2051 | OB5934 H3B raw.raw | 4.2033E6         | 3        | 3                    | 127   | 169 |                                       |                                                                                   | PEAKS DB  |
| K,G(+57.02)LLPHYINAPR.L                        | Y    | 88.07  | 1419.7986 | 12     | 0.8  | 710.9072  | 2 | 31.80 | 4        | F4:1367 | OB5925 H3B raw.raw | 6.0002E5         | 6        | 6                    | 76    | 87  | Carbamidomethylation (DHKE, X@N-term) | G1:Carbamidomethylation (DHKE, X@N-term):80.35                                    | PEAKS PTM |
| K,VQGVDDPRGSMIIVEDELETLSPAVEESGN.G             | Y    | 77.82  | 3184.5081 | 30     | 2.6  | 1593.2655 | 2 | 38.69 | 5        | F5:1920 | OB5934 H3B raw.raw | 9.8208E5         | 2        | 2                    | 210   | 239 |                                       |                                                                                   | PEAKS DB  |
| L.PHYINAPR.L                                   | Y    | 67.39  | 966.5035  | 8      | -0.3 | 484.2589  | 2 | 31.65 | 6        | F6:1495 | OB5935 H3B raw.raw | 3.8685E5         | 3        | 3                    | 80    | 87  |                                       |                                                                                   | PEAKS DB  |
| K,C(-17.03)SFD(+57.02)KLVALEPTK,R              | Y    | 67.01  | 1489.7487 | 13     | 2.1  | 745.8832  | 2 | 34.42 | 4        | F4:1510 | OB5925 H3B raw.raw | 8.2628E5         | 2        | 2                    | 29    | 41  | Ammonia-loss (C@N-term)               | C1:Ammonia-loss (C@N-term):1000.00;D4:Carbamidomethylation (DHKE, X@N-term):14.02 | PEAKS PTM |
| L.LLPHYINAPR.L                                 | Y    | 62.87  | 1192.6716 | 10     | 0.0  | 597.3431  | 2 | 31.41 | 5        | F5:1491 | OB5934 H3B raw.raw | 8.2176E5         | 3        | 3                    | 78    | 87  |                                       |                                                                                   | PEAKS DB  |
| K,C(-17.03)SFD(+57.02)KLVALEPTKR,V             | Y    | 59.13  | 1645.8497 | 14     | 0.3  | 549.6240  | 3 | 32.55 | 4        | F4:1406 | OB5925 H3B raw.raw | 5.152E5          | 2        | 2                    | 29    | 42  | Ammonia-loss (C@N-term)               | C1:Ammonia-loss (C@N-term):1000.00;D4:Carbamidomethylation (DHKE, X@N-term):20.00 | PEAKS PTM |
| L.LPHYINAPR.L                                  | Y    | 58.80  | 1079.5875 | 9      | 0.0  | 540.8010  | 2 | 31.65 | 6        | F6:1499 | OB5935 H3B raw.raw | 1.0935E5         | 2        | 2                    | 79    | 87  |                                       |                                                                                   | PEAKS DB  |
| R,KFFLGKPKQ(+.98)EEKGEEGNMFSGLELK.T            | N    | 54.88  | 2799.3789 | 25     | 8.5  | 934.1415  | 3 | 34.08 | 5        | F5:1645 | OB5934 H3B raw.raw | 0                | 0        | 0                    | 170   | 194 | Deamidation (NQ)                      | Q9:Deamidation (NQ):56.68                                                         | PEAKS DB  |
| K,TVAESLDIDMGIAGKVQGVDDPR,G                    | Y    | 53.61  | 2385.1846 | 23     | 3.9  | 1193.6042 | 2 | 33.53 | 6        | F6:1612 | OB5935 H3B raw.raw | 2.104E5          | 2        | 2                    | 195   | 217 |                                       |                                                                                   | PEAKS DB  |
| V.VPGC(+57.02)PETFREQTR,H                      | Y    | 52.87  | 1575.7463 | 13     | 2.4  | 788.8823  | 2 | 35.35 | 5        | F5:1724 | OB5934 H3B raw.raw | 1.1594E6         | 1        | 1                    | 102   | 114 | Carbamidomethylation                  | C4:Carbamidomethylation:1000,00                                                   | PEAKS DB  |
| K,VQGVDDPRGSM(+15.99)IIVEDELETLSPAVEESGN.G     | Y    | 50.43  | 3200.5029 | 30     | 5.1  | 1601.2670 | 2 | 36.46 | 5        | F5:1790 | OB5934 H3B raw.raw | 8.8212E4         | 1        | 1                    | 210   | 239 | Oxidation (M)                         | M11:Oxidation (M):1000.00                                                         | PEAKS DB  |
| V.PGC(+57.02)PETFREQTR,H                       | Y    | 49.55  | 1476.6780 | 12     | 2.0  | 739.3478  | 2 | 35.59 | 6        | F6:1753 | OB5935 H3B raw.raw | 5.0655E6         | 2        | 2                    | 103   | 114 | Carbamidomethylation                  | C3:Carbamidomethylation:1000,00                                                   | PEAKS DB  |
| R,LQ(+.98)YVLQGTGILETVVPGC(+57.02)PETFREQTR,H  | Y    | 44.26  | 3091.5647 | 27     | 7.8  | 1031.5369 | 3 | 47.69 | 6        | F6:2433 | OB5935 H3B raw.raw | 3.862E3          | 1        | 1                    | 88    | 114 | Carbamidomethylation                  | Q2:Deamidation (NQ):31.56;C18:Carbamidomethylation:1000,00                        | PEAKS DB  |
| total 27 peptides                              |      |        |           |        |      |           |   |       |          |         |                    |                  |          |                      |       |     |                                       |                                                                                   |           |

A0A0F6VX63|A0A0F6VX63\_ARAHY

[back to list](#)

| [Protein Coverage](#) | [Supporting Peptides](#) |

Protein Coverage:

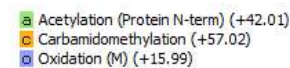

### Supporting Peptides:

| Peptide                        | Uniq | -10lgP | Mass      | Length | ppm  | m/z       | z | RT    | Fraction | Scan    | Source File        | Area Raw Area 3 | #Feature | #Feature Raw Area 3 | Start | End | PTM                  | AScore                           | Found By |
|--------------------------------|------|--------|-----------|--------|------|-----------|---|-------|----------|---------|--------------------|-----------------|----------|---------------------|-------|-----|----------------------|----------------------------------|----------|
| K,LLLPVSSYRYEGDEVNLTAK,T       | Y    | 128,62 | 2492.3525 | 22     | -3,4 | 1247,1793 | 2 | 35,69 | 2        | F2:1789 | OB5937 H3A raw.raw | 1,2701E7        | 5        | 5                   | 148   | 169 |                      |                                  | PEAKS DB |
| K,AFAGWGTNEDLIISILGHR,N        | Y    | 118,74 | 2069,0693 | 19     | 2,6  | 1035,5447 | 2 | 37,54 | 3        | F3:1909 | OB5938 H3A raw.raw | 2,0436E7        | 6        | 6                   | 23    | 41  |                      |                                  | PEAKS DB |
| K,DTTGDIYEKM(+15,99)LLAILGHDDV | Y    | 117,44 | 2120,9937 | 19     | 2,8  | 1061,5071 | 2 | 37,52 | 2        | F2:1899 | OB5937 H3A raw.raw | 1,7507E6        | 3        | 3                   | 298   | 316 | Oxidation (M)        | M9:Oxidation (M):1000.00         | PEAKS DB |
| K,DTTGDIYEMLLAILGHDDV          | Y    | 114,87 | 2104,9985 | 19     | 2,6  | 1053,5093 | 2 | 39,41 | 2        | F2:2009 | OB5937 H3A raw.raw | 2,9926E6        | 3        | 3                   | 298   | 316 |                      |                                  | PEAKS DB |
| R,KAFAGWGTNEDLIISILGHR,N       | Y    | 110,17 | 2197,1643 | 20     | 1,8  | 733,3967  | 3 | 36,03 | 3        | F3:1820 | OB5938 H3A raw.raw | 1,1777E6        | 3        | 3                   | 22    | 41  |                      |                                  | PEAKS DB |
| K,ALDKELSNDFER,L               | Y    | 98,61  | 1435,6942 | 12     | 0,7  | 718,8549  | 2 | 28,58 | 2        | F2:1373 | OB5937 H3A raw.raw | 8,7943E4        | 3        | 3                   | 64    | 75  |                      |                                  | PEAKS DB |
| R,IPQPVPVADDC(+57,02)EQLRK,A   | Y    | 96,06  | 1961,0040 | 17     | 1,9  | 654,6765  | 3 | 28,76 | 2        | F2:1372 | OB5937 H3A raw.raw | 8,3045E5        | 3        | 3                   | 6     | 22  | Carbamidomethylation | C12:Carbamidomethylation:1000.00 | PEAKS DB |
| K,SLEEDVAHHTTGEFR,K            | Y    | 93,56  | 1726,7910 | 15     | 0,2  | 576,6044  | 3 | 30,69 | 1        | F1:1462 | OB5936 H3A raw.raw | 3,5275E5        | 3        | 3                   | 132   | 146 |                      |                                  | PEAKS DB |
| K,MLLAILGHDDV                  | Y    | 91,59  | 1195,6271 | 11     | 1,2  | 598,8215  | 2 | 35,57 | 2        | F2:1777 | OB5937 H3A raw.raw | 1,4911E6        | 3        | 3                   | 306   | 316 |                      |                                  | PEAKS DB |
| K,KAYSDELIR,I                  | Y    | 91,36  | 1208,6036 | 10     | -0,8 | 605,3086  | 2 | 26,68 | 2        | F2:1249 | OB5937 H3A raw.raw | 2,4558E4        | 3        | 3                   | 182   | 191 |                      |                                  | PEAKS DB |
| K,SLEEDVAHHTTGEFRK,L           | Y    | 89,54  | 1854,8860 | 16     | 0,2  | 619,3027  | 3 | 28,20 | 2        | F2:1348 | OB5937 H3A raw.raw | 1,8944E5        | 2        | 2                   | 132   | 147 |                      |                                  | PEAKS DB |
| R,LLLPVSSYRYEGDEVNLTAK,T       | Y    | 88,72  | 2620,4475 | 23     | 1,9  | 874,4915  | 3 | 34,56 | 2        | F2:1726 | OB5937 H3A raw.raw | 1,5288E6        | 3        | 3                   | 147   | 169 |                      |                                  | PEAKS DB |
| R,ETYFETYGEDLLKALDKELSNDFER,L  | Y    | 83,82  | 3024,4238 | 25     | 2,4  | 1009,1509 | 3 | 40,92 | 2        | F2:2098 | OB5937 H3A raw.raw | 9,7793E5        | 2        | 2                   | 51    | 75  |                      |                                  | PEAKS DB |
| R,SSDQLLFAR,K                  | Y    | 82,53  | 1035,5349 | 9      | 1,4  | 518,7755  | 2 | 30,46 | 2        | F2:1477 | OB5937 H3A raw.raw | 3,9148E5        | 3        | 3                   | 114   | 122 |                      |                                  | PEAKS DB |

total 25 peptides

| Peptide                                   | Uniq | -10lgP | Mass      | Length | ppm  | m/z      | z | RT    | Fraction | Scan    | Source File        | Area Raw Ara h 3 | #Feature | #Feature Raw Ara h 3 | Start | End | PTM                                                | AScore                                                                   | Found By  |
|-------------------------------------------|------|--------|-----------|--------|------|----------|---|-------|----------|---------|--------------------|------------------|----------|----------------------|-------|-----|----------------------------------------------------|--------------------------------------------------------------------------|-----------|
| R.ETYFETYGEDLLK,A                         | Y    | 82.24  | 1606.7402 | 13     | -5.6 | 804.3729 | 2 | 36.83 | 1        | F1:1834 | OB5936 H3A raw.raw | 3.134E5          | 2        | 2                    | 51    | 63  |                                                    |                                                                          | PEAKS DB  |
| R.WTSSNQVLMEIAC(+57.02)TR,S               | Y    | 79.90  | 1794.8394 | 15     | 1.8  | 898.4286 | 2 | 36.10 | 1        | F1:1791 | OB5936 H3A raw.raw | 2.4676E5         | 1        | 1                    | 99    | 113 | Carbamidomethylation                               | C13:Carbamidomethylation:1000.00                                         | PEAKS DB  |
| R.WTSSNQVLM(+15.99)EIAC(+57.02)TR,S       | Y    | 76.72  | 1810.8342 | 15     | 1.3  | 906.4255 | 2 | 35.18 | 1        | F1:1732 | OB5936 H3A raw.raw | 7.2086E4         | 2        | 2                    | 99    | 113 | Oxidation (M); Carbamidomethylation                | M9:Oxidation (M):1000.00;C13:Carbamidomethylation:1000.00                | PEAKS DB  |
| R.YEGDEVNLTAK,T                           | Y    | 76.44  | 1350.6666 | 12     | 1.3  | 676.3415 | 2 | 29.90 | 3        | F3:1464 | OB5938 H3A raw.raw | 1.4769E4         | 1        | 1                    | 158   | 169 |                                                    |                                                                          | PEAKS DB  |
| R.LVHLWTLDPAPERDAFLANEATKR,W              | Y    | 74.26  | 2665.3975 | 23     | -0.7 | 667.3562 | 4 | 33.46 | 2        | F2:1665 | OB5937 H3A raw.raw | 4.8836E5         | 3        | 3                    | 76    | 98  |                                                    |                                                                          | PEAKS DB  |
| M.S(+42.01)TLRIPQPVPPVADDC(+57.02)EQLRK,A | Y    | 69.22  | 2460.2795 | 21     | 0.9  | 821.1012 | 3 | 33.70 | 1        | F1:1644 | OB5936 H3A raw.raw | 1.4069E5         | 1        | 1                    | 2     | 22  | Acetylation (Protein N-term); Carbamidomethylation | S1:Acetylation (Protein N-term):1000.00;C16:Carbamidomethylation:1000.00 | PEAKS PTM |
| R.VVATRAEIDLK,I                           | Y    | 42.22  | 1213.7030 | 11     | -0.2 | 607.8586 | 2 | 27.11 | 2        | F2:1285 | OB5937 H3A raw.raw | 4.1122E3         | 1        | 1                    | 267   | 277 |                                                    |                                                                          | PEAKS DB  |
| R.DAFLANEATKR,W                           | Y    | 41.43  | 1234.6306 | 11     | -0.8 | 618.3221 | 2 | 26.52 | 3        | F3:1255 | OB5938 H3A raw.raw | 0                | 0        | 0                    | 88    | 98  |                                                    |                                                                          | PEAKS DB  |
| R.SSVPLDKAVAK,D                           | Y    | 35.59  | 1113.6393 | 11     | -0.7 | 557.8265 | 2 | 25.57 | 2        | F2:1192 | OB5937 H3A raw.raw | 0                | 0        | 0                    | 287   | 297 |                                                    |                                                                          | PEAKS DB  |
| R.AEIDLKIIADEVQRR,S                       | Y    | 35.59  | 1831.9791 | 15     | 0.3  | 611.6672 | 3 | 33.70 | 1        | F1:1650 | OB5936 H3A raw.raw | 8.875E4          | 1        | 1                    | 272   | 286 |                                                    |                                                                          | PEAKS DB  |
| R.IPQPVPPVAD(+14.02)DC(+57.02)EQLRK,A     | Y    | 34.81  | 1975.0197 | 17     | 1.3  | 659.3480 | 3 | 31.07 | 1        | F1:1494 | OB5936 H3A raw.raw | 1.0353E4         | 1        | 1                    | 6     | 22  | Carbamidomethylation                               | D10:Methylation(others):17.01;C12:Carbamidomethylation:1000.00           | PEAKS PTM |
| total 25 peptides                         |      |        |           |        |      |          |   |       |          |         |                    |                  |          |                      |       |     |                                                    |                                                                          |           |

A0A0A6ZDP1|A0A0A6ZDP1\_ARAHY

back to list

| [Protein Coverage](#) | [Supporting Peptides](#) |

Protein Coverage:

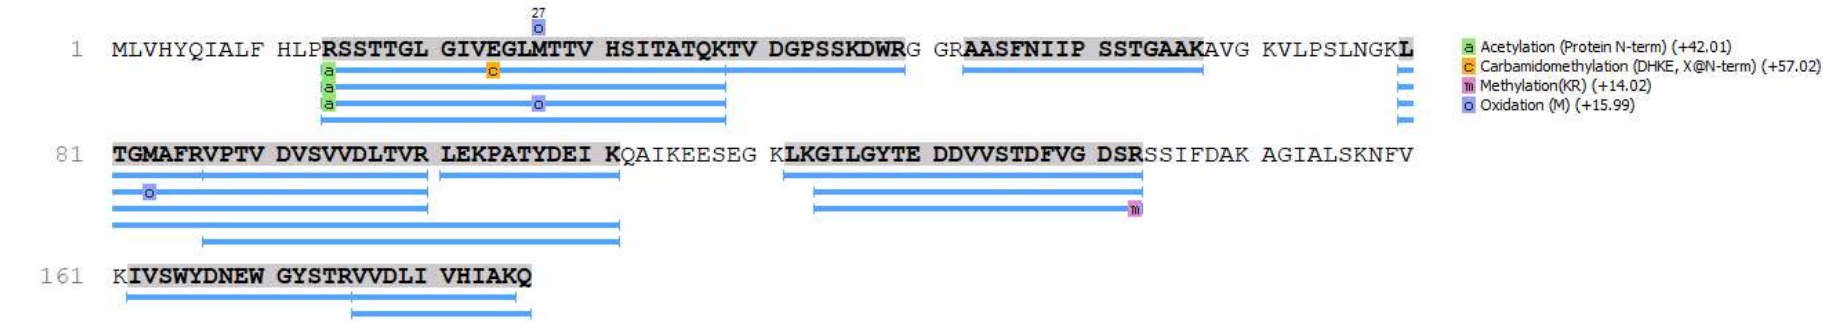

Supporting Peptides:

| Peptide | Uniq | -10lgP | Mass | Length | ppm | m/z | z | RT | Fraction | Scan | Source File | Area Raw Ara h 3 | #Feature | #Feature Raw Ara h 3 | Start | End | PTM | AScore | Found By |
|---------|------|--------|------|--------|-----|-----|---|----|----------|------|-------------|------------------|----------|----------------------|-------|-----|-----|--------|----------|
|---------|------|--------|------|--------|-----|-----|---|----|----------|------|-------------|------------------|----------|----------------------|-------|-----|-----|--------|----------|

total 20 peptides

| Peptide                                       | Uniq | -10lgP | Mass      | Length | ppm  | m/z       | z | RT    | Fraction | Scan    | Source File        | Area Raw Ara h 3 | #Feature | #Feature Raw Ara h 3 | Start | End | PTM                                                                 | AScore                                                                                    | Found By  |
|-----------------------------------------------|------|--------|-----------|--------|------|-----------|---|-------|----------|---------|--------------------|------------------|----------|----------------------|-------|-----|---------------------------------------------------------------------|-------------------------------------------------------------------------------------------|-----------|
| K,GILGYTEDDVVSTDFVGDSR,S                      | Y    | 153.49 | 2143.9910 | 20     | 3.6  | 1073.0066 | 2 | 34.92 | 2        | F2:1742 | OB5937 H3A raw.raw | 1.9792E7         | 9        | 9                    | 124   | 143 |                                                                     |                                                                                           | PEAKS DB  |
| K,IVSWYDNEWGYSTR,V                            | N    | 134.23 | 1774.7950 | 14     | 1.2  | 888.4058  | 2 | 34.01 | 2        | F2:1691 | OB5937 H3A raw.raw | 2.0685E6         | 3        | 3                    | 162   | 175 |                                                                     |                                                                                           | PEAKS DB  |
| R,VPTVDVSVDLTVR,L                             | N    | 121.52 | 1497.8402 | 14     | 1.3  | 749.9283  | 2 | 34.19 | 2        | F2:1704 | OB5937 H3A raw.raw | 2.6396E6         | 3        | 3                    | 87    | 100 |                                                                     |                                                                                           | PEAKS DB  |
| R,VVDLIVHIAKQ                                 | Y    | 113.45 | 1233.7445 | 11     | 1.0  | 617.8801  | 2 | 30.64 | 2        | F2:1484 | OB5937 H3A raw.raw | 1.4659E6         | 6        | 6                    | 176   | 186 |                                                                     |                                                                                           | PEAKS DB  |
| K,LTGMAFRVPTVDVSVDLTVR,L                      | N    | 104.04 | 2274.2405 | 21     | -2.6 | 1138.1245 | 2 | 36.04 | 2        | F2:1813 | OB5937 H3A raw.raw | 1.7435E6         | 4        | 4                    | 80    | 100 |                                                                     |                                                                                           | PEAKS DB  |
| R,AASFNIIPSSTGAAK,A                           | N    | 101.66 | 1433.7513 | 15     | 2.0  | 717.8844  | 2 | 31.01 | 2        | F2:1503 | OB5937 H3A raw.raw | 5.125E6          | 3        | 3                    | 53    | 67  |                                                                     |                                                                                           | PEAKS DB  |
| K,LKGILGYTEDDVVSTDFVGDSR,S                    | Y    | 100.93 | 2385.1699 | 22     | 1.5  | 796.0651  | 3 | 33.83 | 3        | F3:1688 | OB5938 H3A raw.raw | 1.1517E6         | 2        | 2                    | 122   | 143 |                                                                     |                                                                                           | PEAKS DB  |
| K,G(+57.02)ILGYTEDDVVSTDFVGDSR,S              | Y    | 96.93  | 2201.0125 | 20     | 1.2  | 1101.5148 | 2 | 34.92 | 2        | F2:1752 | OB5937 H3A raw.raw | 7.1244E4         | 1        | 1                    | 124   | 143 | G1:Carbamidomethylation (DHKE, X@N-term):30.02                      |                                                                                           | PEAKS PTM |
| K,LTGM(+15.99)AFRVPTVDVSVDLTVR,L              | N    | 93.82  | 2290.2354 | 21     | -5.6 | 764.4148  | 3 | 36.83 | 1        | F1:1833 | OB5936 H3A raw.raw | 1.375E6          | 4        | 4                    | 80    | 100 | Oxidation (M)                                                       | M4:Oxidation (M):1000.00                                                                  | PEAKS DB  |
| P,R(+42.01)SSTTGLGIVEGLM(+15.99)TTVHSITATQK,T | Y    | 87.21  | 2645.3694 | 25     | 7.9  | 882.8040  | 3 | 34.56 | 2        | F2:1722 | OB5937 H3A raw.raw | 1.6313E7         | 3        | 3                    | 14    | 38  | Acetylation (Protein N-term); Oxidation (M)                         | R1:Acetylation (Protein N-term):10 00.00;M14:Oxidation (M):1000.00                        | PEAKS PTM |
| P,R(+42.01)SSTTGLGIVEGLMTTVHSITATQK,T         | Y    | 83.95  | 2629.3745 | 25     | 8.4  | 877.4728  | 3 | 36.96 | 2        | F2:1855 | OB5937 H3A raw.raw | 4.5719E7         | 4        | 4                    | 14    | 38  | Acetylation (Protein N-term)                                        | R1:Acetylation (Protein N-term):10 00.00                                                  | PEAKS PTM |
| P,R(+57.02)S(+42.01)STTGLGIVEGLMTTVHSITATQK,T | Y    | 70.57  | 2686.3960 | 25     | 5.9  | 896.4779  | 3 | 38.70 | 1        | F1:1935 | OB5936 H3A raw.raw | 1.2969E6         | 1        | 1                    | 14    | 38  |                                                                     | R1:Carbamidomethylation (DHKE, X@N-term):29.04;S2:Acetylation (TSCYH):0.00                | PEAKS PTM |
| R,LEKPATYDEIK,Q                               | N    | 68.98  | 1305.6816 | 11     | -1.7 | 653.8470  | 2 | 26.49 | 2        | F2:1243 | OB5937 H3A raw.raw | 0                | 0        | 0                    | 101   | 111 |                                                                     |                                                                                           | PEAKS DB  |
| R,VVDLIVHIAK,Q                                | Y    | 67.01  | 1105.6859 | 10     | 0.2  | 553.8503  | 2 | 30.46 | 2        | F2:1480 | OB5937 H3A raw.raw | 6.1004E4         | 3        | 3                    | 176   | 185 |                                                                     |                                                                                           | PEAKS DB  |
| P,R(+42.01)SSTTGLGIVE(+57.02)GLMTTVHSITATQK,T | Y    | 62.66  | 2686.3960 | 25     | 6.1  | 896.4780  | 3 | 37.14 | 2        | F2:1876 | OB5937 H3A raw.raw | 3.1868E6         | 2        | 2                    | 14    | 38  | Acetylation (Protein N-term); Carbamidomethylation (DHKE, X@N-term) | R1:Acetylation (Protein N-term):10 00.00;E11:Carbamidomethylation (DHKE, X@N-term):201.30 | PEAKS PTM |
| K,GILGYTEDDVVSTDFVGDSR(+14.02),S              | Y    | 61.96  | 2158.0066 | 20     | 2.8  | 1080.0135 | 2 | 35.93 | 3        | F3:1812 | OB5938 H3A raw.raw | 0                | 0        | 0                    | 124   | 143 | Methylation(KR)                                                     | R20:Methylation(KR):1000.00                                                               | PEAKS PTM |
| R,VPTVDVSVDLTVRLEKPATYDEIK,Q                  | N    | 61.92  | 2785.5112 | 25     | -4.1 | 929.5072  | 3 | 36.47 | 1        | F1:1815 | OB5936 H3A raw.raw | 3.1435E6         | 4        | 4                    | 87    | 111 |                                                                     |                                                                                           | PEAKS DB  |
| K,LTGMAFRVPTVDVSVDLTVRLEKPATYDEIK,Q           | N    | 53.47  | 3561.9116 | 32     | -4.9 | 891.4808  | 4 | 37.76 | 1        | F1:1887 | OB5936 H3A raw.raw | 1.7224E6         | 2        | 2                    | 80    | 111 |                                                                     |                                                                                           | PEAKS DB  |
| K,TVDGPSSKDWR,G                               | N    | 51.15  | 1246.5942 | 11     | -1.7 | 624.3033  | 2 | 26.08 | 2        | F2:1212 | OB5937 H3A raw.raw | 1.1675E4         | 2        | 2                    | 39    | 49  |                                                                     |                                                                                           | PEAKS DB  |
| K,LTGMAFR,V                                   | N    | 42.85  | 794.4109  | 7      | 1.0  | 398.2131  | 2 | 30.69 | 1        | F1:1449 | OB5936 H3A raw.raw | 9.0748E3         | 1        | 1                    | 80    | 86  |                                                                     |                                                                                           | PEAKS DB  |
| total 20 peptides                             |      |        |           |        |      |           |   |       |          |         |                    |                  |          |                      |       |     |                                                                     |                                                                                           |           |

Q647H3|Q647H3\_ARAHY

[back to list](#)

[Protein Coverage](#) | [Supporting Peptides](#) |  
Protein Coverage:

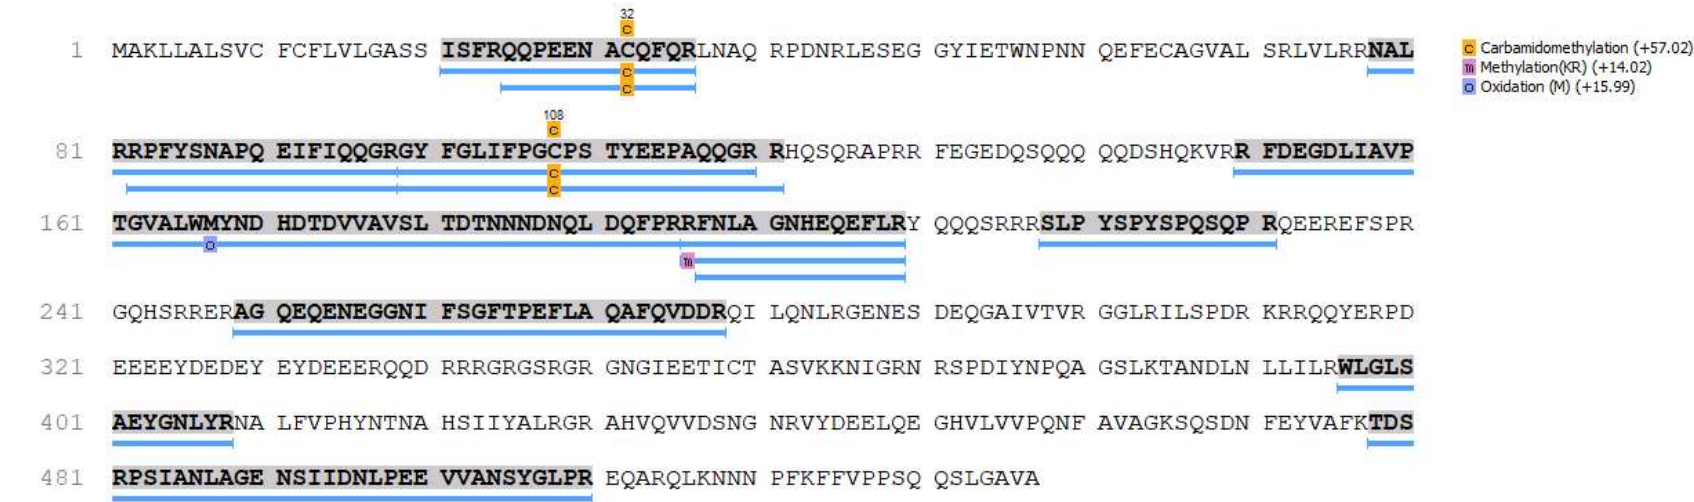

Supporting Peptides:

| Peptide                                  | Uniq | -10lgP | Mass      | Length | ppm | m/z       | z | RT    | Fraction | Scan    | Source File        | Area Raw Area 3 | #Feature | #Feature Raw Area 3 | Start | End | PTM                  | AScore                           | Found By |
|------------------------------------------|------|--------|-----------|--------|-----|-----------|---|-------|----------|---------|--------------------|-----------------|----------|---------------------|-------|-----|----------------------|----------------------------------|----------|
| R.GYFGLIFPGC(+57.02)PSTYEPAQQGR.R        | N    | 135.05 | 2473.1372 | 22     | 3.9 | 1237.5807 | 2 | 36.47 | 4        | F4:1635 | OB5925 H3B raw,raw | 5.6724E5        | 5        | 5                   | 99    | 120 | Carbamidomethylation | C10:Carbamidomethylation:1000.00 | PEAKS DB |
| R.RPFYSSAPQEIFIQGR.G                     | N    | 119.14 | 2050.0383 | 17     | 2.3 | 1026.0288 | 2 | 31.40 | 3        | F3:1547 | OB5938 H3A raw,raw | 1.5008E6        | 8        | 8                   | 82    | 98  |                      |                                  | PEAKS DB |
| R.RFNLAGNHEQEFLR.Y                       | N    | 113.49 | 1729.8647 | 14     | 1.5 | 577.6297  | 3 | 30.08 | 2        | F2:1438 | OB5937 H3A raw,raw | 6.1619E6        | 6        | 6                   | 196   | 209 |                      |                                  | PEAKS DB |
| R.AGQ(+.98)EQENEGGNIFSGFTPEFLAQAFQVDDR.Q | N    | 102.24 | 3301.4800 | 30     | 5.9 | 1651.7571 | 2 | 39.98 | 2        | F2:2041 | OB5937 H3A raw,raw | 3.2739E5        | 1        | 1                   | 249   | 278 |                      | Q3:Deamidation (NQ):14.04        | PEAKS DB |
| S.ISFRQQPEENAC(+57.02)QFQR.L             | N    | 92.73  | 2036.9486 | 16     | 0.8 | 679.9907  | 3 | 27.97 | 3        | F3:1335 | OB5938 H3A raw,raw | 1.7296E5        | 3        | 3                   | 21    | 36  | Carbamidomethylation | C12:Carbamidomethylation:1000.00 | PEAKS DB |
| R.WLGLSAEYGNLYR.N                        | N    | 90.48  | 1540.7673 | 13     | 0.4 | 771.3912  | 2 | 34.97 | 4        | F4:1558 | OB5925 H3B raw,raw | 1.2371E5        | 1        | 1                   | 396   | 408 |                      |                                  | PEAKS DB |
| R.AGQEENEGGNIFSGFTPEFLAQAFQVDDR.Q        | N    | 87.17  | 3300.4958 | 30     | 2.5 | 1651.2593 | 2 | 39.97 | 3        | F3:2048 | OB5938 H3A raw,raw | 0               | 0        | 0                   | 249   | 278 |                      |                                  | PEAKS DB |
| R.NALRRPFYSSAPQEIFIQGR.G                 | N    | 82.56  | 2504.3037 | 21     | 1.7 | 835.7766  | 3 | 33.51 | 1        | F1:1633 | OB5936 H3A raw,raw | 9.3975E5        | 4        | 4                   | 78    | 98  |                      |                                  | PEAKS DB |
| R.GYFGLIFPGC(+57.02)PSTYEPAQQGR.H        | N    | 81.37  | 2629.2383 | 23     | 1.6 | 877.4214  | 3 | 34.78 | 4        | F4:1543 | OB5925 H3B raw,raw | 1.2146E6        | 3        | 3                   | 99    | 121 | Carbamidomethylation | C10:Carbamidomethylation:1000.00 | PEAKS DB |
| total 18 peptides                        |      |        |           |        |     |           |   |       |          |         |                    |                 |          |                     |       |     |                      |                                  |          |



| Peptide                                                              | Uniq | -10lgP | Mass      | Length | ppm  | m/z       | z | RT    | Fraction | Scan    | Source File        | Area Raw Area 3 | #Feature | #Feature Raw Area 3 | Start | End | PTM                  | AScore                                                                            | Found By  |
|----------------------------------------------------------------------|------|--------|-----------|--------|------|-----------|---|-------|----------|---------|--------------------|-----------------|----------|---------------------|-------|-----|----------------------|-----------------------------------------------------------------------------------|-----------|
| R,FNLAGNHEQEFLR.Y                                                    | N    | 68,89  | 1573,7637 | 13     | 1,4  | 787,8902  | 2 | 30,26 | 3        | F3:1483 | OB5938 H3A raw,raw | 1,9024E5        | 5        | 5                   | 197   | 209 |                      |                                                                                   | PEAKS DB  |
| R,QQPEENAC(+57.02)QFQR.L                                             | N    | 54,65  | 1533,6630 | 12     | 1,7  | 767,8401  | 2 | 25,17 | 2        | F2:1164 | OB5937 H3A raw,raw | 6,6881E3        | 2        | 2                   | 25    | 36  | Carbamidomethylation | C8:Carbamidomethylation:1000,00                                                   | PEAKS DB  |
| R,SLPYSPY(+31.99)SPQSQPR.Q                                           | N    | 54,08  | 1637,7686 | 14     | 1,0  | 819,8923  | 2 | 29,76 | 1        | F1:1401 | OB5936 H3A raw,raw | 3,8534E4        | 1        | 1                   | 218   | 231 |                      | Y7:Dihydroxy:0,00                                                                 | PEAKS PTM |
| R,FNLAGNH(+14,02)EQEFLR.Y                                            | N    | 44,51  | 1587,7793 | 13     | 1,9  | 530,2681  | 3 | 32,39 | 1        | F1:1568 | OB5936 H3A raw,raw | 1,4807E5        | 2        | 2                   | 197   | 209 |                      | H7:Methylation (others):33,98                                                     | PEAKS PTM |
| R,R(+14.02)FNLAGNHEQEFLR.Y                                           | N    | 43,10  | 1743,8805 | 14     | -0,1 | 582,3007  | 3 | 32,19 | 1        | F1:1569 | OB5936 H3A raw,raw | 1,2906E6        | 2        | 2                   | 196   | 209 | Methylation(KR)      | R1:Methylation (KR):67,11                                                         | PEAKS PTM |
| K,TDSRPSIANLAGENSIIDNLPEEVVANSYGLPR,E                                | Y    | 38,26  | 3510,7590 | 33     | 4,1  | 1171,2651 | 3 | 37,58 | 5        | F5:1869 | OB5934 H3B raw,raw | 4,1382E5        | 1        | 1                   | 478   | 510 |                      |                                                                                   | PEAKS DB  |
| R,RFDEGDLIAVPTGVALWM(+15,99)YN(+,98)DHDTDVVAVSLDTNNDNQ(+,98)LDQFPR,R | Y    | 35,22  | 5208,3892 | 46     | 8,7  | 1737,1521 | 3 | 38,89 | 1        | F1:1958 | OB5936 H3A raw,raw | 1,266E5         | 1        | 1                   | 150   | 195 | Oxidation (M)        | M18:Oxidation (M):1000,00; N20:Deamidation (N Q):12,67; Q40:Deamidation (NQ):0,00 | PEAKS DB  |
| R,SLPYSP(+31,99)YSPQSQPR.Q                                           | N    | 35,06  | 1637,7686 | 14     | 1,7  | 819,8929  | 2 | 27,29 | 2        | F2:1288 | OB5937 H3A raw,raw | 7,4071E4        | 1        | 1                   | 218   | 231 |                      | P6:Dihydroxy:0,00                                                                 | PEAKS PTM |
| R,R(+57.02)FNLAGNHEQEFLR.Y                                           | N    | 32,70  | 1786,8862 | 14     | -0,5 | 596,6357  | 3 | 32,39 | 1        | F1:1563 | OB5936 H3A raw,raw | 6,2203E4        | 1        | 1                   | 196   | 209 |                      | R1:Carbamidomethylation (DHKE, X@N-term):9,75                                     | PEAKS PTM |
| total 18 peptides                                                    |      |        |           |        |      |           |   |       |          |         |                    |                 |          |                     |       |     |                      |                                                                                   |           |

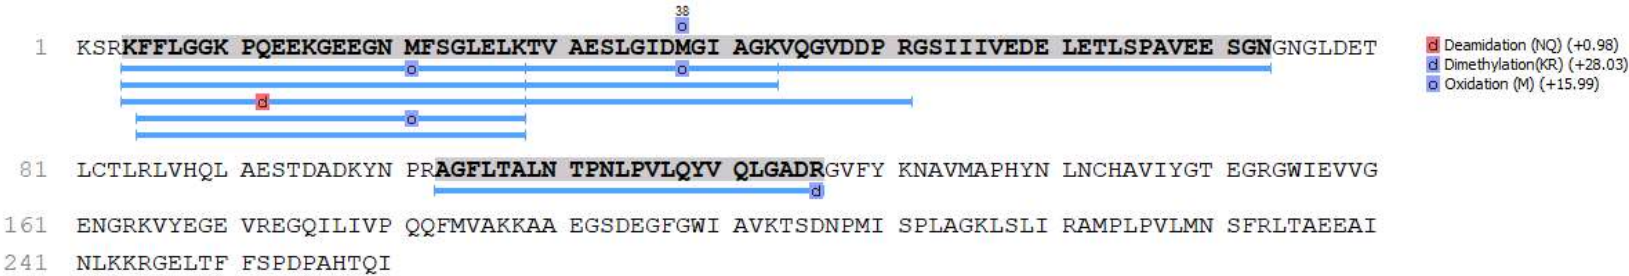

Supporting Peptides:

| Peptide                               | Uniq | -10lgP | Mass      | Length | ppm | m/z       | z | RT    | Fraction | Scan    | Source File        | Area Raw Ara h 3 | #Feature | #Feature Raw Ara h 3 | Start | End | PTM               | AScore                        | Found By  |
|---------------------------------------|------|--------|-----------|--------|-----|-----------|---|-------|----------|---------|--------------------|------------------|----------|----------------------|-------|-----|-------------------|-------------------------------|-----------|
| K.FFLGGKPQEEKGEEGNMFSGLELK.T          | N    | 162.92 | 2670.2998 | 24     | 2.4 | 891.1094  | 3 | 34.78 | 4        | F4:1553 | OB5925 H3B raw.raw | 1.858E7          | 6        | 6                    | 5     | 28  |                   |                               | PEAKS DB  |
| K.TVAESLGIDMGIAGK.V                   | Y    | 139.60 | 1460.7544 | 15     | 2.2 | 731.3861  | 2 | 33.48 | 5        | F5:1604 | OB5934 H3B raw.raw | 4.8068E6         | 3        | 3                    | 29    | 43  |                   |                               | PEAKS DB  |
| R.KFFLGKKPQEEKGEEGNMFSGLELK.T         | N    | 122.64 | 2798.3948 | 25     | 2.1 | 933.8075  | 3 | 34.42 | 4        | F4:1518 | OB5925 H3B raw.raw | 1.4026E7         | 9        | 9                    | 4     | 28  |                   |                               | PEAKS DB  |
| K.TVAESLGIDM(+15.99)GIAGK.V           | Y    | 104.94 | 1476.7494 | 15     | 1.8 | 739.3833  | 2 | 30.84 | 5        | F5:1465 | OB5934 H3B raw.raw | 3.5299E4         | 3        | 3                    | 29    | 43  | Oxidation (M)     | M10:Oxidation (M):100 0,00    | PEAKS DB  |
| K.FFLGGKPQEEKGEEGNM(+15.99)FSGLELK.T  | N    | 102.01 | 2686.2947 | 24     | 1.7 | 896.4404  | 3 | 32.74 | 4        | F4:1411 | OB5925 H3B raw.raw | 2.6867E6         | 4        | 4                    | 5     | 28  | Oxidation (M)     | M17:Oxidation (M):100 0,00    | PEAKS DB  |
| R.KFFLGKKPQEEKGEEGNM(+15.99)FSGLELK.T | N    | 101.19 | 2814.3896 | 25     | 0.9 | 704.6053  | 4 | 32.34 | 5        | F5:1545 | OB5934 H3B raw.raw | 1.3174E6         | 4        | 4                    | 4     | 28  | Oxidation (M)     | M18:Oxidation (M):100 0,00    | PEAKS DB  |
| R.AGFLTALNTPNLPVLQYVQLGADR(+28.03).G  | Y    | 89.94  | 2598.4170 | 24     | 3.2 | 1300.2200 | 2 | 40.37 | 5        | F5:2024 | OB5934 H3B raw.raw | 3.0506E5         | 1        | 1                    | 103   | 126 | Dimethylation(KR) | R24:Dimethylation(KR):1000.00 | PEAKS PTM |
| K.VQGVDDPRGSIIVEDELETLSPAVEESGN.G     | Y    | 79.95  | 3166.5518 | 30     | 3.5 | 1584.2887 | 2 | 39.25 | 5        | F5:1952 | OB5934 H3B raw.raw | 3.2404E6         | 3        | 3                    | 44    | 73  |                   |                               | PEAKS DB  |
| R.KFFLGKKPQ(+.98)EEKGEEGNMFSGLELK.T   | N    | 54.88  | 2799.3789 | 25     | 8.5 | 934.1415  | 3 | 34.08 | 5        | F5:1645 | OB5934 H3B raw.raw | 0                | 0        | 0                    | 4     | 28  | Deamidation (NQ)  | Q9:Deamidation (NQ):5 6,68    | PEAKS DB  |
| K.TVAESLGIDMGIAGKVQGVDDPR.G           | Y    | 38.80  | 2327.1790 | 23     | 3.2 | 1164.6005 | 2 | 33.53 | 6        | F6:1613 | OB5935 H3B raw.raw | 3.4542E4         | 1        | 1                    | 29    | 51  |                   |                               | PEAKS DB  |
| total 10 peptides                     |      |        |           |        |     |           |   |       |          |         |                    |                  |          |                      |       |     |                   |                               |           |

A0A0A6ZDT0|A0A0A6ZDT0\_ARAHY

[back to list](#)

| [Protein Coverage](#) | [Supporting Peptides](#) |

Protein Coverage:

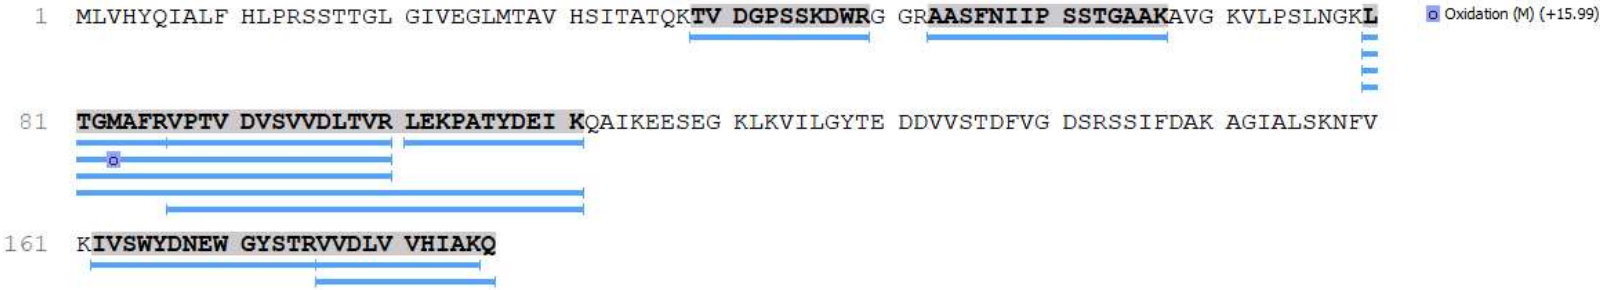

Supporting Peptides:

| Peptide           | Uniq | -10lgP | Mass | Length | ppm | m/z | z | RT | Fraction | Scan | Source File | Area Raw Ara h 3 | #Feature | #Feature Raw Ara h 3 | Start | End | PTM | AScore | Found By |
|-------------------|------|--------|------|--------|-----|-----|---|----|----------|------|-------------|------------------|----------|----------------------|-------|-----|-----|--------|----------|
| total 12 peptides |      |        |      |        |     |     |   |    |          |      |             |                  |          |                      |       |     |     |        |          |



| Peptide                              | Uniq | -10lgP | Mass      | Length | ppm  | m/z       | z | RT    | Fraction | Scan    | Source File        | Area Raw Ara h 3 | #Feature | #Feature Raw Ara h 3 | Start | End | PTM           | AScore                   | Found By |
|--------------------------------------|------|--------|-----------|--------|------|-----------|---|-------|----------|---------|--------------------|------------------|----------|----------------------|-------|-----|---------------|--------------------------|----------|
| K.IVSWYDNEWGYSTR.V                   | N    | 134.23 | 1774.7950 | 14     | 1.2  | 888.4058  | 2 | 34.01 | 2        | F2:1691 | OB5937 H3A raw.raw | 2.0685E6         | 3        | 3                    | 162   | 175 |               |                          | PEAKS DB |
| R.VPTVDVSVVDLTVR.L                   | N    | 121.52 | 1497.8402 | 14     | 1.3  | 749.9283  | 2 | 34.19 | 2        | F2:1704 | OB5937 H3A raw.raw | 2.6396E6         | 3        | 3                    | 87    | 100 |               |                          | PEAKS DB |
| K.LTGMAFRVPTVDVSVVDLTVR.L            | N    | 104.04 | 2274.2405 | 21     | -2.6 | 1138.1245 | 2 | 36.04 | 2        | F2:1813 | OB5937 H3A raw.raw | 1.7435E6         | 4        | 4                    | 80    | 100 |               |                          | PEAKS DB |
| R.AASFNIIPSSTGAAK.A                  | N    | 101.66 | 1433.7513 | 15     | 2.0  | 717.8844  | 2 | 31.01 | 2        | F2:1503 | OB5937 H3A raw.raw | 5.125E6          | 3        | 3                    | 53    | 67  |               |                          | PEAKS DB |
| R.VVDLVVHIAKQ                        | Y    | 98.43  | 1219.7289 | 11     | 0.6  | 610.8721  | 2 | 29.51 | 2        | F2:1414 | OB5937 H3A raw.raw | 1.0958E6         | 6        | 6                    | 176   | 186 |               |                          | PEAKS DB |
| K.LTGM(+15.99)AFRVPTVDVSVVDLTVR.L    | N    | 93.82  | 2290.2354 | 21     | -5.6 | 764.4148  | 3 | 36.83 | 1        | F1:1833 | OB5936 H3A raw.raw | 1.375E6          | 4        | 4                    | 80    | 100 | Oxidation (M) | M4:Oxidation (M):1000.00 | PEAKS DB |
| R.LEKPATYDEIK.Q                      | N    | 68.98  | 1305.6816 | 11     | -1.7 | 653.8470  | 2 | 26.49 | 2        | F2:1243 | OB5937 H3A raw.raw | 0                | 0        | 0                    | 101   | 111 |               |                          | PEAKS DB |
| R.VPTVDVSVVDLTVRLEKPATYDEIK.Q        | N    | 61.92  | 2785.5112 | 25     | -4.1 | 929.5072  | 3 | 36.47 | 1        | F1:1815 | OB5936 H3A raw.raw | 3.1435E6         | 4        | 4                    | 87    | 111 |               |                          | PEAKS DB |
| R.VVDLVVHIAK.Q                       | Y    | 55.01  | 1091.6703 | 10     | 0.4  | 546.8427  | 2 | 29.14 | 3        | F3:1409 | OB5938 H3A raw.raw | 1.7498E4         | 2        | 2                    | 176   | 185 |               |                          | PEAKS DB |
| K.LTGMAFRVPTVDVSVVDLTVRLEKPATYDEIK.Q | N    | 53.47  | 3561.9116 | 32     | -4.9 | 891.4808  | 4 | 37.76 | 1        | F1:1887 | OB5936 H3A raw.raw | 1.7224E6         | 2        | 2                    | 80    | 111 |               |                          | PEAKS DB |
| K.TVDGPSSKDWR.G                      | N    | 51.15  | 1246.5942 | 11     | -1.7 | 624.3033  | 2 | 26.08 | 2        | F2:1212 | OB5937 H3A raw.raw | 1.1675E4         | 2        | 2                    | 39    | 49  |               |                          | PEAKS DB |
| K.LTGMAFR.V                          | N    | 42.85  | 794.4109  | 7      | 1.0  | 398.2131  | 2 | 30.69 | 1        | F1:1449 | OB5936 H3A raw.raw | 9.0748E3         | 1        | 1                    | 80    | 86  |               |                          | PEAKS DB |
| total 12 peptides                    |      |        |           |        |      |           |   |       |          |         |                    |                  |          |                      |       |     |               |                          |          |

E9LFE9|E9LFE9\_ARAHY

back to list

| Protein Coverage | Supporting Peptides |

Protein Coverage:

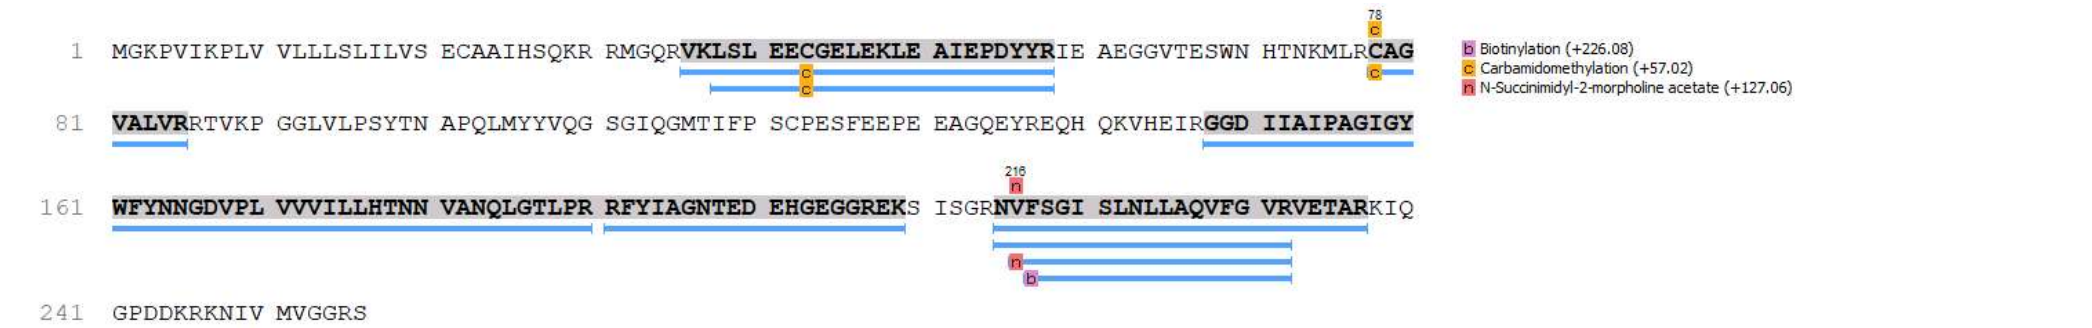

Supporting Peptides:

| Peptide                             | Uniq | -10lgP | Mass      | Length | ppm | m/z      | z | RT    | Fraction | Scan    | Source File        | Area Raw Ara h 3 | #Feature | #Feature Raw Ara h 3 | Start | End | PTM                  | AScore                          | Found By |
|-------------------------------------|------|--------|-----------|--------|-----|----------|---|-------|----------|---------|--------------------|------------------|----------|----------------------|-------|-----|----------------------|---------------------------------|----------|
| K.LSLEEC(+57.02)GELEKLEAIEPDYYR.I   | Y    | 136.26 | 2555.2100 | 21     | 1.7 | 852.7454 | 3 | 34.79 | 5        | F5:1692 | OB5934 H3B raw.raw | 1.2508E6         | 4        | 4                    | 38    | 58  | Carbamidomethylation | C6:Carbamidomethylation:1000.00 | PEAKS DB |
| R.NVFSGISLNLLAQVFGVR.V              | Y    | 122.96 | 1933.0785 | 18     | 2.8 | 967.5492 | 2 | 43.21 | 5        | F5:2172 | OB5934 H3B raw.raw | 1.5453E6         | 5        | 5                    | 215   | 232 |                      |                                 | PEAKS DB |
| R.VKLSLEEC(+57.02)GELEKLEAIEPDYYR.I | Y    | 120.68 | 2782.3735 | 23     | 1.8 | 928.4668 | 3 | 34.24 | 5        | F5:1649 | OB5934 H3B raw.raw | 7.0271E5         | 2        | 2                    | 36    | 58  | Carbamidomethylation | C8:Carbamidomethylation:1000.00 | PEAKS DB |

total 11 peptides

| Peptide                                         | Uniq | -10lgP | Mass      | Length | ppm  | m/z       | z | RT    | Fraction | Scan    | Source File              | Area Raw<br>Ara h 3 | #Feature | #Feature<br>Raw Ara h 3 | Start | End | PTM                                 | AScore                                         | Found<br>By  |
|-------------------------------------------------|------|--------|-----------|--------|------|-----------|---|-------|----------|---------|--------------------------|---------------------|----------|-------------------------|-------|-----|-------------------------------------|------------------------------------------------|--------------|
| R.NVFSGISLNLLAQVFGVRVETAR,K                     | Y    | 84.03  | 2489.3755 | 23     | 3.0  | 830.8016  | 3 | 42.69 | 4        | F4:1993 | OB5925<br>H3B<br>raw.raw | 4.1048E6            | 4        | 4                       | 215   | 237 |                                     |                                                | PEAKS<br>DB  |
| R.C(+57.02)AGVALVR,R                            | Y    | 76.26  | 844.4589  | 8      | 1.7  | 423.2374  | 2 | 26.94 | 4        | F4:1100 | OB5925<br>H3B<br>raw.raw | 1.0611E3            | 1        | 1                       | 78    | 85  | Carbamidomethylation                | C1:Carbamidomethylation:1000.00                | PEAKS<br>DB  |
| N.V(+127.06)FSGISLNLLAQVFGVR,V                  | Y    | 58.01  | 1946.0989 | 17     | -9.0 | 974.0479  | 2 | 41.75 | 6        | F6:2092 | OB5935<br>H3B<br>raw.raw | 1.8558E7            | 5        | 5                       | 216   | 232 | N-Succinimidyl-2-morpholine acetate | V1:N-Succinimidyl-2-morpholine acetate:1000.00 | PEAKS<br>PTM |
| R.GGDIIAIPAGIGYWFYNNGDVPLVVVILLHTNNVANQLGTLPR,R | Y    | 50.04  | 4573.4482 | 43     | 3.5  | 1525.4954 | 3 | 44.60 | 4        | F4:2114 | OB5925<br>H3B<br>raw.raw | 9.2311E5            | 3        | 3                       | 148   | 190 |                                     |                                                | PEAKS<br>DB  |
| R.NVFSGIS(+13.03)LNLLAQVFGVR,V                  | Y    | 46.36  | 1946.1101 | 18     | -9.4 | 974.0532  | 2 | 47.20 | 5        | F5:2410 | OB5934<br>H3B<br>raw.raw | 0                   | 0        | 0                       | 215   | 232 |                                     | S7:Michael addition with methylamine:16.65     | PEAKS<br>PTM |
| R.NVFSGIS(+14.02)LNLLAQVFGVR,V                  | Y    | 42.16  | 1947.0941 | 18     | 2.0  | 974.5563  | 2 | 47.47 | 4        | F4:2277 | OB5925<br>H3B<br>raw.raw | 0                   | 0        | 0                       | 215   | 232 |                                     | S7:Methylation(others):15.62                   | PEAKS<br>PTM |
| R.RFYIAGNTEDEHGEKGR,K                           | Y    | 35.61  | 2163.9932 | 19     | -0.6 | 542.0052  | 4 | 29.79 | 6        | F6:1390 | OB5935<br>H3B<br>raw.raw | 1.1167E4            | 1        | 1                       | 191   | 209 |                                     |                                                | PEAKS<br>DB  |
| V.F(+226.08)SGISLNLLAQVFGVR,V                   | Y    | 33.77  | 1946.0447 | 16     | 2.4  | 974.0319  | 2 | 50.95 | 4        | F4:2479 | OB5925<br>H3B<br>raw.raw | 0                   | 0        | 0                       | 217   | 232 | Biotinylation                       | F1:Biotinylation:1000.00                       | PEAKS<br>PTM |
| total 11 peptides                               |      |        |           |        |      |           |   |       |          |         |                          |                     |          |                         |       |     |                                     |                                                |              |

A0A0F7GF62|A0A0F7GF62\_ARAHY

back to list

| Protein Coverage | Supporting Peptides |

Protein Coverage:

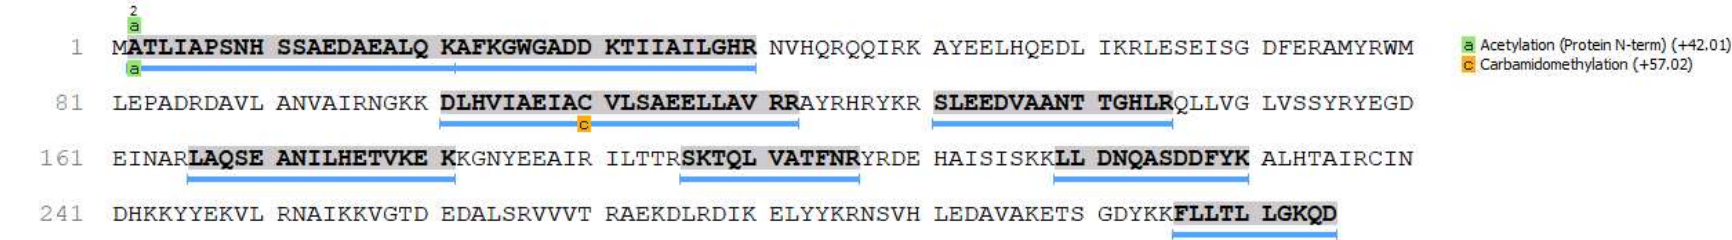

Supporting Peptides:

| Peptide                            | Uniq | -10lgP | Mass      | Length | ppm  | m/z       | z | RT    | Fraction | Scan    | Source File           | Area Raw<br>Ara h 3 | #Feature | #Feature<br>Raw Ara h 3 | Start | End | PTM                          | AScore                                  | Found<br>By  |
|------------------------------------|------|--------|-----------|--------|------|-----------|---|-------|----------|---------|-----------------------|---------------------|----------|-------------------------|-------|-----|------------------------------|-----------------------------------------|--------------|
| R.SLEEDVAANTTGHLR,Q                | Y    | 128.71 | 1611.7853 | 15     | 0.6  | 806.9004  | 2 | 29.32 | 2        | F2:1409 | OB5937 H3A<br>raw.raw | 2.1959E5            | 3        | 3                       | 131   | 145 |                              |                                         | PEAKS<br>DB  |
| M.A(+42.01)TLIAPSNHSSAEDAEALQ,K    | Y    | 103.49 | 2094.0229 | 20     | 1.7  | 1048.0205 | 2 | 30.83 | 2        | F2:1507 | OB5937 H3A<br>raw.raw | 1.9399E5            | 3        | 3                       | 2     | 21  | Acetylation (Protein N-term) | A1:Acetylation (Protein N-term):1000.00 | PEAKS<br>PTM |
| R.SKTQLVATFNR,Y                    | Y    | 96.50  | 1263.6935 | 11     | 0.6  | 632.8544  | 2 | 27.65 | 2        | F2:1310 | OB5937 H3A<br>raw.raw | 1.9511E3            | 1        | 1                       | 196   | 206 |                              |                                         | PEAKS<br>DB  |
| K.FLLTLGKQD                        | Y    | 81.14  | 1146.6648 | 10     | 0.9  | 574.3402  | 2 | 35.29 | 3        | F3:1769 | OB5938 H3A<br>raw.raw | 1.1511E6            | 2        | 2                       | 306   | 315 |                              |                                         | PEAKS<br>DB  |
| K.AFKGGWADDKTIIAILGHR,N            | Y    | 59.59  | 2068.1218 | 19     | -0.4 | 518.0375  | 4 | 33.81 | 3        | F3:1685 | OB5938 H3A<br>raw.raw | 0                   | 0        | 0                       | 22    | 40  |                              |                                         | PEAKS<br>DB  |
| K.LLDNQASDDFYK,A                   | Y    | 50.72  | 1427.6569 | 12     | 0.8  | 714.8362  | 2 | 30.00 | 2        | F2:1465 | OB5937 H3A<br>raw.raw | 2.1343E4            | 2        | 2                       | 219   | 230 |                              |                                         | PEAKS<br>DB  |
| K.DLHVIAEIAE(+57.02)VLSAEELLAVRR,A | Y    | 35.66  | 2476.3472 | 22     | 3.2  | 826.4590  | 3 | 41.50 | 1        | F1:2111 | OB5936 H3A<br>raw.raw | 8.5296E4            | 1        | 1                       | 101   | 122 | Carbamidomethylation         | C10:Carbamidomethylation:1000.00        | PEAKS<br>DB  |

total 8 peptides

| Peptide              | Uniq | -10lgP | Mass      | Length | ppm | m/z      | z | RT    | Fraction | Scan    | Source File        | Area Raw Ara h 3 | #Feature | #Feature Raw Ara h 3 | Start | End | PTM | AScore | Found By |
|----------------------|------|--------|-----------|--------|-----|----------|---|-------|----------|---------|--------------------|------------------|----------|----------------------|-------|-----|-----|--------|----------|
| R.LAQSEANILHETVKEK.K | Y    | 35.22  | 1808,9631 | 16     | 0.6 | 603.9954 | 3 | 28.02 | 2        | F2:1341 | OB5937 H3A raw,raw | 1.063E4          | 1        | 1                    | 166   | 181 |     |        | PEAKS DB |
| total 8 peptides     |      |        |           |        |     |          |   |       |          |         |                    |                  |          |                      |       |     |     |        |          |

Q6IWG5|Q6IWG5\_ARAHY

back to list

| [Protein Coverage](#) | [Supporting Peptides](#) |

Protein Coverage:

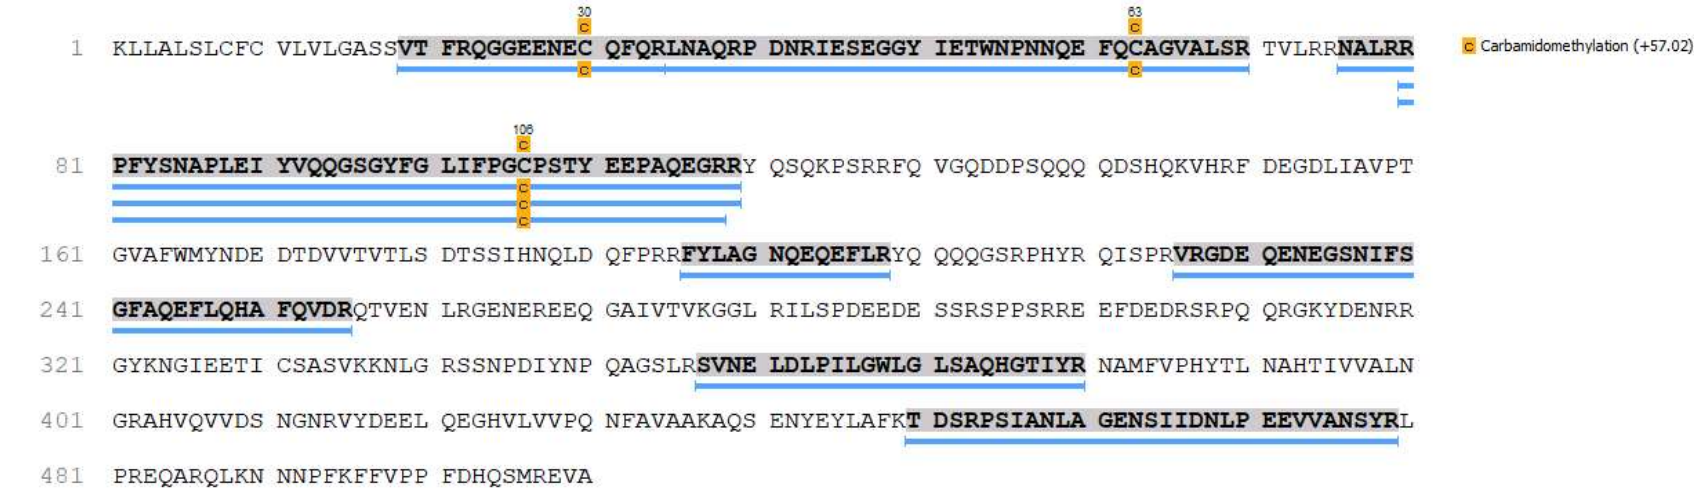

Supporting Peptides:

| Peptide                                            | Uniq | -10lgP | Mass      | Length | ppm | m/z       | z | RT    | Fraction | Scan    | Source File        | Area Raw Ara h 3 | #Feature | #Feature Raw Ara h 3 | Start | End | PTM                  | AScore                            | Found By |
|----------------------------------------------------|------|--------|-----------|--------|-----|-----------|---|-------|----------|---------|--------------------|------------------|----------|----------------------|-------|-----|----------------------|-----------------------------------|----------|
| R.LNAQRPDNRISEGGYIETWNPNNQEFQC(+57.02)AGVALSR.T    | Y    | 116.63 | 4132.9409 | 36     | 3.0 | 1034.2456 | 4 | 33.11 | 5        | F5:1590 | OB5934 H3B raw,raw | 2.0092E6         | 3        | 3                    | 35    | 70  | Carbamidomethylation | C29:Carbamidomethylation: 1000,00 | PEAKS DB |
| K.TDSRPSIANLAGENSIIDNLPEEVVANSYR.L                 | Y    | 83.57  | 3243.6006 | 30     | 2.9 | 1082.2106 | 3 | 36.46 | 5        | F5:1789 | OB5934 H3B raw,raw | 2.8671E5         | 1        | 1                    | 450   | 479 |                      |                                   | PEAKS DB |
| R.SVNELDLPILGWLGLSAQHGTIYR.N                       | Y    | 77.09  | 2651.4070 | 24     | 1.8 | 884.8112  | 3 | 41.50 | 5        | F5:2076 | OB5934 H3B raw,raw | 1.8337E6         | 4        | 4                    | 357   | 380 |                      |                                   | PEAKS DB |
| R.RPFYSNAPLEIYVQQSGGYFGLIFPGC(+57.02)PSTYEPAQEGR.R | Y    | 76.78  | 4424.0845 | 39     | 5.2 | 1475.7097 | 3 | 38.66 | 2        | F2:1955 | OB5937 H3A raw,raw | 1.3954E6         | 3        | 3                    | 80    | 118 | Carbamidomethylation | C27:Carbamidomethylation: 1000,00 | PEAKS DB |
| R.FYLAGNQEQEFLR.Y                                  | Y    | 73.60  | 1613.7837 | 13     | 1.1 | 807.9000  | 2 | 33.08 | 2        | F2:1641 | OB5937 H3A raw,raw | 2.0837E4         | 1        | 1                    | 196   | 208 |                      |                                   | PEAKS DB |
| R.VRGDEQENEGSNIFSFGFAQEFLQHAFQVDR.Q                | Y    | 54.63  | 3453.5974 | 30     | 2.2 | 864.4086  | 4 | 40.19 | 1        | F1:2028 | OB5936 H3A raw,raw | 1.0226E6         | 2        | 2                    | 226   | 255 |                      |                                   | PEAKS DB |
| S.VTFRQGGEENEC(+57.02)QFQR.L                       | Y    | 52.22  | 1983.8857 | 16     | 2.4 | 662.3041  | 3 | 27.37 | 2        | F2:1301 | OB5937 H3A raw,raw | 3.4333E3         | 1        | 1                    | 19    | 34  | Carbamidomethylation | C12:Carbamidomethylation: 1000,00 | PEAKS DB |
| R.RPFYSNAPLEIYVQQSGGYFGLIFPGC(+57.02)PSTYEPAQEGR.Y | Y    | 35.79  | 4580.1860 | 40     | 2.2 | 1527.7394 | 3 | 37.52 | 2        | F2:1900 | OB5937 H3A raw,raw | 6.9008E5         | 1        | 1                    | 80    | 119 | Carbamidomethylation | C27:Carbamidomethylation: 1000,00 | PEAKS DB |

total 9 peptides

| Peptide                                                      | Uniq | -10lgP | Mass      | Length | ppm | m/z       | z | RT    | Fraction | Scan    | Source File        | Area Raw Area h 3 | #Feature | #Feature Raw Area h 3 | Start | End | PTM                  | AScore                                                       | Found By |
|--------------------------------------------------------------|------|--------|-----------|--------|-----|-----------|---|-------|----------|---------|--------------------|-------------------|----------|-----------------------|-------|-----|----------------------|--------------------------------------------------------------|----------|
| R,NALRRPFYSNAPLEIYVQ(+.98)QGSYFGLIFPGC(+57.02)PSTYEPAQEGRR.Y | Y    | 33.49  | 5035.4351 | 44     | 6.6 | 1259.8744 | 4 | 38.70 | 1        | F1:1944 | OB5936 H3A raw.raw | 4.3989E5          | 1        | 1                     | 76    | 119 | Carbamidomethylation | Q18:Deamidation (NQ):0.00; C31:Carbamidomethylation: 1000.00 | PEAKS DB |
| total 9 peptides                                             |      |        |           |        |     |           |   |       |          |         |                    |                   |          |                       |       |     |                      |                                                              |          |

Q0GM57|Q0GM57\_ARAHY

back to list

| [Protein Coverage](#) | [Supporting Peptides](#) |

Protein Coverage:

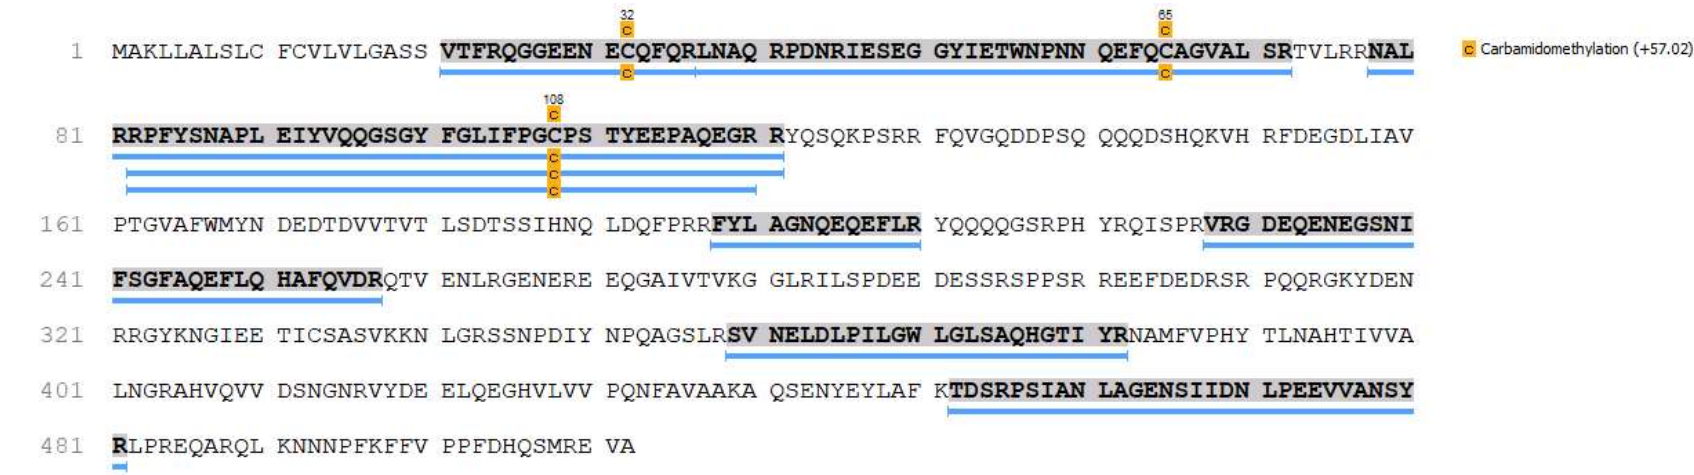

Supporting Peptides:

| Peptide                                            | Uniq | -10lgP | Mass      | Length | ppm | m/z       | z | RT    | Fraction | Scan    | Source File        | Area Raw Area h 3 | #Feature | #Feature Raw Area h 3 | Start | End | PTM                  | AScore                            | Found By |
|----------------------------------------------------|------|--------|-----------|--------|-----|-----------|---|-------|----------|---------|--------------------|-------------------|----------|-----------------------|-------|-----|----------------------|-----------------------------------|----------|
| R.LNAQRPDNRIESEGGYIETWNPNNQEFQC(+57.02)AGVALSR.T   | Y    | 116.63 | 4132.9409 | 36     | 3.0 | 1034.2456 | 4 | 33.11 | 5        | F5:1590 | OB5934 H3B raw.raw | 2.0092E6          | 3        | 3                     | 37    | 72  | Carbamidomethylation | C29:Carbamidomethylation: 1000.00 | PEAKS DB |
| K.TDSRPSIANLAGENSIIDNLPEEVVANSYR.L                 | Y    | 83.57  | 3243.6006 | 30     | 2.9 | 1082.2106 | 3 | 36.46 | 5        | F5:1789 | OB5934 H3B raw.raw | 2.8671E5          | 1        | 1                     | 452   | 481 |                      |                                   | PEAKS DB |
| R.SVNELDLPILGWLGLSAQHGTIYR.N                       | Y    | 77.09  | 2651.4070 | 24     | 1.8 | 884.8112  | 3 | 41.50 | 5        | F5:2076 | OB5934 H3B raw.raw | 1.8337E6          | 4        | 4                     | 359   | 382 |                      |                                   | PEAKS DB |
| R.RPFYSNAPLEIYVQQSGSYFGLIFPGC(+57.02)PSTYEPAQEGR.R | Y    | 76.78  | 4424.0845 | 39     | 5.2 | 1475.7097 | 3 | 38.66 | 2        | F2:1955 | OB5937 H3A raw.raw | 1.3954E6          | 3        | 3                     | 82    | 120 | Carbamidomethylation | C27:Carbamidomethylation: 1000.00 | PEAKS DB |
| R.FYLAGNQEQEFLR.Y                                  | Y    | 73.60  | 1613.7837 | 13     | 1.1 | 807.9000  | 2 | 33.08 | 2        | F2:1641 | OB5937 H3A raw.raw | 2.0837E4          | 1        | 1                     | 198   | 210 |                      |                                   | PEAKS DB |
| R.VRGDEQENEGSNIFSGFAQEFLQHAFQVDR.Q                 | Y    | 54.63  | 3453.5974 | 30     | 2.2 | 864.4086  | 4 | 40.19 | 1        | F1:2028 | OB5936 H3A raw.raw | 1.0226E6          | 2        | 2                     | 228   | 257 |                      |                                   | PEAKS DB |
| S.VTFRQGGEE NEC(+57.02)QFQR.L                      | Y    | 52.22  | 1983.8857 | 16     | 2.4 | 662.3041  | 3 | 27.37 | 2        | F2:1301 | OB5937 H3A raw.raw | 3.4333E3          | 1        | 1                     | 21    | 36  | Carbamidomethylation | C12:Carbamidomethylation: 1000.00 | PEAKS DB |

|                  |
|------------------|
| total 9 peptides |
|------------------|

| Peptide                                                         | Uniq | -10lgP | Mass      | Length | ppm | m/z       | z | RT    | Fraction | Scan    | Source File        | Area Raw Ara h 3 | #Feature | #Feature Raw Ara h 3 | Start | End | PTM                  | AScore                                                       | Found By |
|-----------------------------------------------------------------|------|--------|-----------|--------|-----|-----------|---|-------|----------|---------|--------------------|------------------|----------|----------------------|-------|-----|----------------------|--------------------------------------------------------------|----------|
| R,RPFYSNAPLEIYVQGGSGYFGLIFPGC(+57.02)PSTYEPAQEGR.R.Y            | Y    | 35.79  | 4580.1860 | 40     | 2.2 | 1527.7394 | 3 | 37.52 | 2        | F2:1900 | OB5937 H3A raw.raw | 6.9008E5         | 1        | 1                    | 82    | 121 | Carbamidomethylation | C27:Carbamidomethylation: 1000.00                            | PEAKS DB |
| R,NALRRPFYSNAPLEIYVQ(+.98)QGGSGYFGLIFPGC(+57.02)PSTYEPAQEGR.R.Y | Y    | 33.49  | 5035.4351 | 44     | 6.6 | 1259.8744 | 4 | 38.70 | 1        | F1:1944 | OB5936 H3A raw.raw | 4.3989E5         | 1        | 1                    | 78    | 121 | Carbamidomethylation | Q18:Deamidation (NQ):0.00; C31:Carbamidomethylation: 1000.00 | PEAKS DB |
| total 9 peptides                                                |      |        |           |        |     |           |   |       |          |         |                    |                  |          |                      |       |     |                      |                                                              |          |

D8KXZ8|D8KXZ8\_ARAHY

back to list

| Protein Coverage | Supporting Peptides |

Protein Coverage:

1

MATTPFSGLQ TAMSRSCLPS SQRSNVMAFS GKSMVGSWNK LASVCHVSSV QPFQRVFTSS TIKFERIVTK AMSDSSQKSL

81

VSGLPIDLKG KRAFIAGVAD DNGYGWAIK ALAAAGAQIL VGTWVPALNI FESSLRGKF DESRVLPDGS LMEITKVYPL

161

DAVFDNPEDV PEDIKTNKRY AGSSKWTVQE VAESVKEDFG TIDILVHSLA NGPEVTKPLL ETSRNGYLAA LSASSYSYVS

241

LLKHFLPIMN PGGSSISLTY IASEKIIPGY GGMSSAKAA LESDTRVLAF EAGRKRKIRV NTISAGPLRS RAAKAIGFID

321

MMIDYSIANA PLQKELSADE VGNSAAFLAS PLASAITGTV LYVDNGLNAM GVGVDSPVFK DLDIPKQDH

Deamidation (NQ) (+0.98)

Supporting Peptides:

| Peptide                                    | Uniq | -10lgP | Mass      | Length | ppm  | m/z       | z | RT    | Fraction | Scan    | Source File        | Area Raw Ara h 3 | #Feature | #Feature Raw Ara h 3 | Start | End | PTM              | AScore                       | Found By |
|--------------------------------------------|------|--------|-----------|--------|------|-----------|---|-------|----------|---------|--------------------|------------------|----------|----------------------|-------|-----|------------------|------------------------------|----------|
| K,AIGFIDMMIDYSIANAPLQK.E                   | N    | 121.19 | 2210.1116 | 20     | 3.4  | 1106.0668 | 2 | 40.60 | 3        | F3:2085 | OB5938 H3A raw.raw | 0                | 0        | 0                    | 315   | 334 |                  |                              | PEAKS DB |
| K,ALAAAGAQILVGTWVPALNIFESSLR.G             | Y    | 73.91  | 2823.5759 | 27     | 3.3  | 942.2024  | 3 | 42.17 | 1        | F1:2142 | OB5936 H3A raw.raw | 0                | 0        | 0                    | 111   | 137 |                  |                              | PEAKS DB |
| K,VYPLDAVFDNPEDVPEDIKTNK.R.Y               | N    | 72.98  | 2673.3286 | 23     | 0.9  | 892.1176  | 3 | 33.08 | 3        | F3:1637 | OB5938 H3A raw.raw | 5.7671E5         | 3        | 3                    | 157   | 179 |                  |                              | PEAKS DB |
| K,ALAAAGAQILVGTWVPALNIFESSLR.R             | Y    | 67.95  | 2667.4749 | 26     | 3.2  | 1334.7490 | 2 | 42.57 | 2        | F2:2189 | OB5937 H3A raw.raw | 1.6879E4         | 2        | 2                    | 111   | 136 |                  |                              | PEAKS DB |
| R,VNTISAGPLR.S                             | N    | 62.49  | 1026.5822 | 10     | 1.4  | 514.2991  | 2 | 27.48 | 2        | F2:1306 | OB5937 H3A raw.raw | 3.2787E3         | 1        | 1                    | 300   | 309 |                  |                              | PEAKS DB |
| K.SLVSGLPIDLK.G                            | N    | 47.68  | 1140.6754 | 11     | -0.5 | 571.3447  | 2 | 34.19 | 2        | F2:1708 | OB5937 H3A raw.raw | 2.8994E5         | 1        | 1                    | 79    | 89  |                  |                              | PEAKS DB |
| W.VPALN(+.98)IFESSLR.R                     | N    | 43.00  | 1345.7241 | 12     | 1.0  | 673.8700  | 2 | 33.70 | 1        | F1:1639 | OB5936 H3A raw.raw | 1.1143E4         | 1        | 1                    | 125   | 136 | Deamidation (NQ) | N5:Deamidation (NQ): 1000.00 | PEAKS DB |
| K.WTVQVEASVKEDFGTIDILVHSLANGPEVTKPLLETSR.N | N    | 33.27  | 4307.2324 | 39     | 1.2  | 1077.8167 | 4 | 43.60 | 1        | F1:2217 | OB5936 H3A raw.raw | 9.6238E5         | 1        | 1                    | 186   | 224 |                  |                              | PEAKS DB |
| R,VLPDGSMLMITK.V                           | N    | 33.18  | 1301.6901 | 12     | 1.5  | 651.8533  | 2 | 32.33 | 3        | F3:1607 | OB5938 H3A raw.raw | 1.2455E5         | 1        | 1                    | 145   | 156 |                  |                              | PEAKS DB |
| total 9 peptides                           |      |        |           |        |      |           |   |       |          |         |                    |                  |          |                      |       |     |                  |                              |          |

H6U596|H6U596\_ARAHY

back to list

| Protein Coverage | Supporting Peptides |

Protein Coverage:



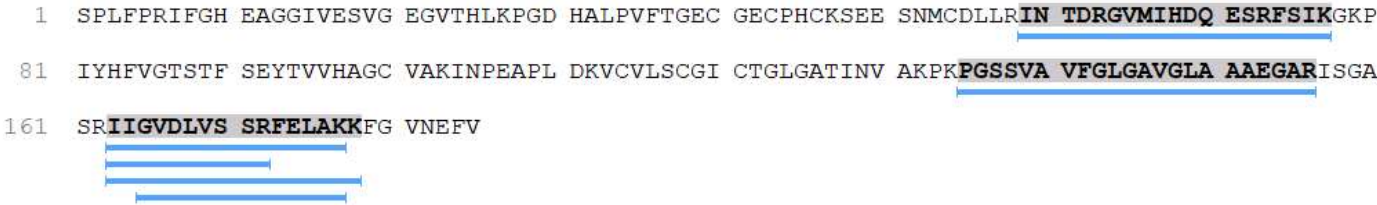

Supporting Peptides:

| Peptide                     | Uniq | -10lgP | Mass      | Length | ppm  | m/z      | z | RT    | Fraction | Scan    | Source File        | Area Raw Ara h 3 | #Feature | #Feature Raw Ara h 3 | Start | End | PTM                                             | AScore | Found By  |
|-----------------------------|------|--------|-----------|--------|------|----------|---|-------|----------|---------|--------------------|------------------|----------|----------------------|-------|-----|-------------------------------------------------|--------|-----------|
| R.IIGVDLVSSRFELAK,K         | Y    | 122.53 | 1645.9402 | 15     | 1.1  | 823.9783 | 2 | 33.84 | 2        | F2:1678 | OB5937 H3A raw.raw | 1.8835E7         | 6        | 6                    | 163   | 177 |                                                 |        | PEAKS DB  |
| R.IIGVDLVSSR,F              | Y    | 83.02  | 1057.6132 | 10     | 0.2  | 529.8140 | 2 | 31.58 | 2        | F2:1551 | OB5937 H3A raw.raw | 1.959E5          | 2        | 2                    | 163   | 172 |                                                 |        | PEAKS DB  |
| R.INTDRGVMIHDQESRFSIK,G     | Y    | 80.10  | 2245.1272 | 19     | 0.2  | 562.2892 | 4 | 29.32 | 2        | F2:1415 | OB5937 H3A raw.raw | 4.7416E4         | 1        | 1                    | 59    | 77  |                                                 |        | PEAKS DB  |
| K.PGSSVAVFGLGAVGLAAEGAR,I   | Y    | 60.25  | 1956.0428 | 22     | -2.3 | 979.0265 | 2 | 37.95 | 1        | F1:1901 | OB5936 H3A raw.raw | 1.1681E5         | 1        | 1                    | 135   | 156 |                                                 |        | PEAKS DB  |
| R,I(+57.02)IGVDLVSSRFELAK,K | Y    | 55.15  | 1702.9617 | 15     | 0.3  | 852.4884 | 2 | 36.07 | 1        | F1:1782 | OB5936 H3A raw.raw | 0                | 0        | 0                    | 163   | 177 | I1:Carbamidomethylation (DHKE, X@N-term): 41,53 |        | PEAKS PTM |
| I.GVDLVSSRFELAK,K           | Y    | 41.78  | 1419.7721 | 13     | 0.6  | 710.8937 | 2 | 33.65 | 3        | F3:1682 | OB5938 H3A raw.raw | 3.3254E5         | 2        | 2                    | 165   | 177 |                                                 |        | PEAKS DB  |
| R.IIGVDLVSSRFELAKK,F        | Y    | 35.47  | 1774.0352 | 16     | 1.6  | 592.3533 | 3 | 32.33 | 2        | F2:1590 | OB5937 H3A raw.raw | 9.7384E5         | 1        | 1                    | 163   | 178 |                                                 |        | PEAKS DB  |
| total 7 peptides            |      |        |           |        |      |          |   |       |          |         |                    |                  |          |                      |       |     |                                                 |        |           |

B4UW81|B4UW81\_ARAHY

[back to list](#)

[Protein Coverage](#) | [Supporting Peptides](#) |

Protein Coverage:

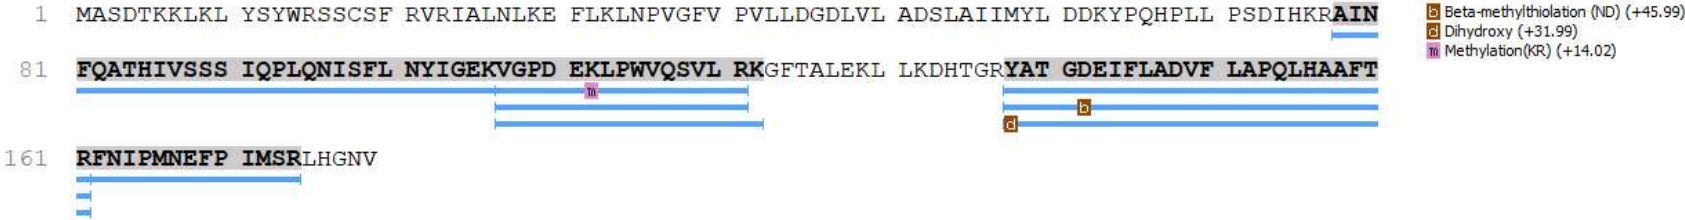

Supporting Peptides:

| Peptide                             | Uniq | -10lgP | Mass      | Length | ppm | m/z       | z | RT    | Fraction | Scan    | Source File        | Area Raw Ara h 3 | #Feature | #Feature Raw Ara h 3 | Start | End | PTM                        | AScore                             | Found By  |
|-------------------------------------|------|--------|-----------|--------|-----|-----------|---|-------|----------|---------|--------------------|------------------|----------|----------------------|-------|-----|----------------------------|------------------------------------|-----------|
| K.VGPDEKLPPWQSVLR,K                 | Y    | 109.83 | 1721.9464 | 15     | 1.4 | 574.9902  | 3 | 34.05 | 5        | F5:1636 | OB5934 H3B raw.raw | 1.7988E6         | 5        | 5                    | 107   | 121 |                            |                                    | PEAKS DB  |
| R.AINFQATHIVSSSIQPLQNISFLNYIGEK,V   | Y    | 104.21 | 3231.6929 | 29     | 2.8 | 1078.2412 | 3 | 38.13 | 5        | F5:1882 | OB5934 H3B raw.raw | 2.7951E6         | 4        | 4                    | 78    | 106 |                            |                                    | PEAKS DB  |
| R.YATGDEIFLADVFLAPQLHAAFT,F         | Y    | 91.73  | 2665.3540 | 24     | 2.2 | 889.4606  | 3 | 40.56 | 5        | F5:2030 | OB5934 H3B raw.raw | 3.0891E6         | 4        | 4                    | 138   | 161 |                            |                                    | PEAKS DB  |
| R.FNIPMNEFPIMSR,L                   | Y    | 73.26  | 1594.7635 | 13     | 2.9 | 798.3914  | 2 | 35.91 | 4        | F4:1610 | OB5925 H3B raw.raw | 1.1285E6         | 3        | 3                    | 162   | 174 |                            |                                    | PEAKS DB  |
| R.YATGD(+45.99)EIFLADVFLAPQLHAAFT,F | Y    | 64.39  | 2711.3416 | 24     | 1.0 | 904.7887  | 3 | 40.37 | 5        | F5:2016 | OB5934 H3B raw.raw | 6.3461E5         | 1        | 1                    | 138   | 161 | Beta-methylthiolation (ND) | D5:Beta-methylthiolation (ND):71.2 | PEAKS PTM |

total 8 peptides

| Peptide                                                   | Uniq | -10lgP | Mass      | Length | ppm  | m/z      | z | RT    | Fraction | Scan    | Source File        | Area Raw Ara h 3 | #Feature | #Feature Raw Ara h 3 | Start | End | PTM             | AScore                                                       | Found By  |
|-----------------------------------------------------------|------|--------|-----------|--------|------|----------|---|-------|----------|---------|--------------------|------------------|----------|----------------------|-------|-----|-----------------|--------------------------------------------------------------|-----------|
| R.Y(+31.99)AT(+14.02)GDEIFLADVFLAPQLHAAFT <sub>R</sub> .F | Y    | 58.57  | 2711.3594 | 24     | -4.0 | 904.7901 | 3 | 40.81 | 6        | F6:2032 | OB5935 H3B raw.raw | 6.1471E5         | 1        | 1                    | 138   | 161 | Dihydroxy       | Y1:Dihydroxy:104.80;T3:Methylation(others):41.83             | PEAKS PTM |
| K.VGPDEKL <sub>P</sub> WVQSVLRK.G                         | Y    | 36.83  | 1850.0414 | 16     | -1.4 | 617.6869 | 3 | 32.38 | 4        | F4:1404 | OB5925 H3B raw.raw | 5.764E4          | 1        | 1                    | 107   | 122 |                 |                                                              | PEAKS DB  |
| K.VGP(+15.99)DEK(+14.02)LPWVQSVLR.K                       | Y    | 35.41  | 1751.9569 | 15     | 1.0  | 584.9935 | 3 | 33.91 | 6        | F6:1628 | OB5935 H3B raw.raw | 4.3613E5         | 1        | 1                    | 107   | 121 | Methylation(KR) | P3:Oxidation or Hydroxylation:0.00;K6:Methylation(KR):145.00 | PEAKS PTM |
| total 8 peptides                                          |      |        |           |        |      |          |   |       |          |         |                    |                  |          |                      |       |     |                 |                                                              |           |

N1NKG9|N1NKG9\_ARAHY

back to list

| Protein Coverage | Supporting Peptides |

Protein Coverage:

1MSQEQHRRPEESDPIKYGDVFNVSGELAQKPVKPEDAAMMQSAETRVLGKTQPGGAAAAMQSAATLNEQA GLVGHHDVNE

81VAGDRGVTVTDMQAPGRRIVTESVGGQVVGQYVEPTPVQSSRASAVRESAITIGEAL<sub>EAT</sub>AQTVGSKPVEQSDAAAIQAA

161EVRATGSNVIQPGGLAAMAQSAVAFNAGCRNPRDKIKLADILTGATAKLPADKAATHQDAEGVASAEARNNTGGTTPGGV

241AASVAAAAARLNENNVN

Supporting Peptides:

| Peptide                                               | Uniq | -10lgP | Mass      | Length | ppm | m/z       | z | RT    | Fraction | Scan    | Source File        | Area Raw Ara h 3 | #Feature | #Feature Raw Ara h 3 | Start | End | PTM | AScore                               | Found By  |
|-------------------------------------------------------|------|--------|-----------|--------|-----|-----------|---|-------|----------|---------|--------------------|------------------|----------|----------------------|-------|-----|-----|--------------------------------------|-----------|
| K.LADILTGATAK.L                                       | Y    | 109.92 | 1072.6128 | 11     | 0.5 | 537.3140  | 2 | 29.90 | 2        | F2:1453 | OB5937 H3A raw.raw | 1.4089E5         | 3        | 3                    | 198   | 208 |     |                                      | PEAKS DB  |
| R.ESAITIGEAL <sub>EAT</sub> AQTVGSKPVEQSDAAAIQAAEVR.A | Y    | 104.28 | 3610.8325 | 36     | 1.7 | 1204.6201 | 3 | 35.85 | 3        | F3:1809 | OB5938 H3A raw.raw | 2.358E6          | 4        | 4                    | 128   | 163 |     |                                      | PEAKS DB  |
| R.IVTESVGGQVVGQYVEPTPVQSSR.A                          | Y    | 94.88  | 2515.2917 | 24     | 3.6 | 1258.6577 | 2 | 31.77 | 2        | F2:1561 | OB5937 H3A raw.raw | 1.1935E5         | 2        | 2                    | 99    | 122 |     |                                      | PEAKS DB  |
| R.NNTGGTTPGGVAASVAAAAR.L                              | Y    | 77.27  | 1741.8707 | 20     | 1.0 | 871.9435  | 2 | 32.21 | 1        | F1:1555 | OB5936 H3A raw.raw | 9.5216E4         | 3        | 3                    | 230   | 249 |     |                                      | PEAKS DB  |
| R.IVTESVGGQ(+.98)VVGQYVEPTPVQSSR.A                    | Y    | 60.10  | 2516.2759 | 24     | 9.6 | 1259.1573 | 2 | 31.77 | 5        | F5:1521 | OB5934 H3B raw.raw | 9.01E3           | 1        | 1                    | 99    | 122 |     | Q9:Deamidation (NQ):48.43            | PEAKS DB  |
| R.NNTGGTTPGGVAASVAAAAR(+15.99).L                      | Y    | 47.01  | 1757.8656 | 20     | 2.7 | 879.9424  | 2 | 30.14 | 1        | F1:1433 | OB5936 H3A raw.raw | 1.8033E4         | 1        | 1                    | 230   | 249 |     | R20:Oxidation or Hydroxylation:20.78 | PEAKS PTM |
| R.NNTGGTTP(+15.99)GGVAASVAAAAR.L                      | Y    | 44.57  | 1757.8656 | 20     | 1.2 | 879.9412  | 2 | 27.83 | 2        | F2:1320 | OB5937 H3A raw.raw | 3.3239E4         | 1        | 1                    | 230   | 249 |     | P8:Oxidation or Hydroxylation:20.77  | PEAKS PTM |
| total 7 peptides                                      |      |        |           |        |     |           |   |       |          |         |                    |                  |          |                      |       |     |     |                                      |           |

Q42515|Q42515\_ARAHY

back to list

| Protein Coverage | Supporting Peptides |

Protein Coverage:

1MKFCNFFTFTLALIVVLQALGASAD<sub>DAGTI</sub>ITQPLYNEFLKHLTDSRCEAHGEFYTYNAFVTAARAFFAFGTGDDVTRKR

81ELAAFFGQTSHETTGTTNAPDEFWGYCFLREQTKEQHC DSTQAPCPAGKQYYGRGPIQLTSNSNYQLA GQAIKADLIN

161NPDLVATDAVISFKTAIWFWMTPQGKNKPSCHDVITNAWRPTATDSAAGRAPGYGVITNII NGGIECGKGA NTNSNNRIGF

241YKRYCDILKI GYGSNLDCANQQHF

Supporting Peptides:

| Peptide | Uniq | -10lgP | Mass | Length | ppm | m/z | z | RT | Fraction | Scan | Source File | Area Raw Ara h 3 | #Feature | #Feature Raw Ara h 3 | Start | End | PTM | AScore | Found By |
|---------|------|--------|------|--------|-----|-----|---|----|----------|------|-------------|------------------|----------|----------------------|-------|-----|-----|--------|----------|
|---------|------|--------|------|--------|-----|-----|---|----|----------|------|-------------|------------------|----------|----------------------|-------|-----|-----|--------|----------|

| Peptide                         | Uniq | -10lgP | Mass      | Length | ppm | m/z       | z | RT    | Fraction | Scan    | Source File        | Area Raw Ara h 3 | #Feature | #Feature Raw Ara h 3 | Start | End | PTM                  | AScore                           | Found By |
|---------------------------------|------|--------|-----------|--------|-----|-----------|---|-------|----------|---------|--------------------|------------------|----------|----------------------|-------|-----|----------------------|----------------------------------|----------|
| K.ADLINNPDLVATDAVISFK.T         | Y    | 120.18 | 2015.0575 | 19     | 2.8 | 1008.5388 | 2 | 36.32 | 6        | F6:1776 | OB5935 H3B raw.raw | 3,6486E5         | 3        | 3                    | 156   | 174 |                      |                                  | PEAKS DB |
| A.DDAGTIITQPLYNEFLK.H           | Y    | 112.05 | 1936.9781 | 17     | 1.8 | 969.4980  | 2 | 37.02 | 5        | F5:1823 | OB5934 H3B raw.raw | 3,7509E5         | 3        | 3                    | 25    | 41  |                      |                                  | PEAKS DB |
| R.APGYGVITNIINGGIEC(+57.02)GK.G | Y    | 76.97  | 1931.9774 | 19     | 2.8 | 966.9987  | 2 | 35.96 | 6        | F6:1755 | OB5935 H3B raw.raw | 1.6903E5         | 2        | 2                    | 210   | 228 | Carbamidomethylation | C17:Carbamidomethylation:1000,00 | PEAKS DB |
| total 3 peptides                |      |        |           |        |     |           |   |       |          |         |                    |                  |          |                      |       |     |                      |                                  |          |

A0A075M981|A0A075M981\_ARAHY

back to list

| Protein Coverage | Supporting Peptides |

Protein Coverage:

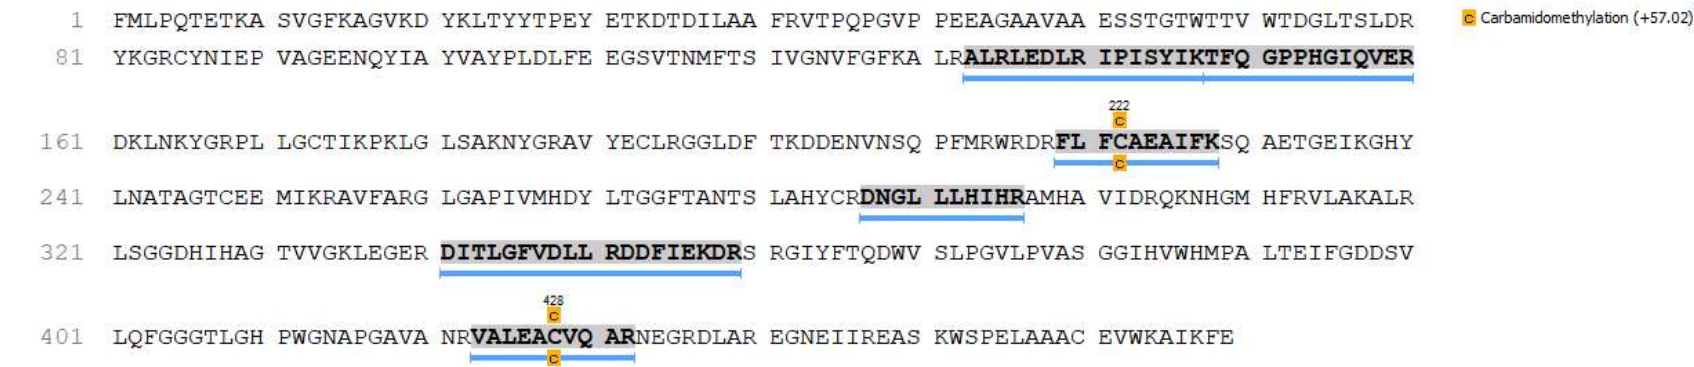

Supporting Peptides:

| Peptide                 | Uniq | -10lgP | Mass      | Length | ppm | m/z      | z | RT    | Fraction | Scan    | Source File        | Area Raw Ara h 3 | #Feature | #Feature Raw Ara h 3 | Start | End | PTM                  | AScore                          | Found By |
|-------------------------|------|--------|-----------|--------|-----|----------|---|-------|----------|---------|--------------------|------------------|----------|----------------------|-------|-----|----------------------|---------------------------------|----------|
| R.DITLGFVDLLRDDFIEKDR.S | Y    | 96.63  | 2279.1797 | 19     | 2.4 | 760.7357 | 3 | 38.30 | 3        | F3:1951 | OB5938 H3A raw.raw | 2,0066E5         | 1        | 1                    | 341   | 359 |                      |                                 | PEAKS DB |
| R.ALRLEDLRIPISYIK.T     | Y    | 86.70  | 1799.0669 | 15     | 0.5 | 450.7742 | 4 | 34.01 | 3        | F3:1706 | OB5938 H3A raw.raw | 1.0366E6         | 3        | 3                    | 133   | 147 |                      |                                 | PEAKS DB |
| R.VALEAC(+57.02)VQAR.N  | Y    | 84.77  | 1115.5757 | 10     | 3.3 | 558.7969 | 2 | 26.89 | 3        | F3:1278 | OB5938 H3A raw.raw | 0                | 0        | 0                    | 423   | 432 | Carbamidomethylation | C6:Carbamidomethylation:1000,00 | PEAKS DB |
| K.TFQGPPHGIQVER.D       | Y    | 55.73  | 1464.7473 | 13     | 0.5 | 489.2566 | 3 | 30.19 | 1        | F1:1435 | OB5936 H3A raw.raw | 2,0466E4         | 2        | 2                    | 148   | 160 |                      |                                 | PEAKS DB |
| R.FLFC(+57.02)AEAIFK.S  | Y    | 53.81  | 1244.6263 | 10     | 0.8 | 623.3209 | 2 | 36.22 | 3        | F3:1836 | OB5938 H3A raw.raw | 8.051E4          | 1        | 1                    | 219   | 228 | Carbamidomethylation | C4:Carbamidomethylation:1000,00 | PEAKS DB |
| R.DNGLLLHIHR.A          | Y    | 38.59  | 1186.6571 | 10     | 0.2 | 396.5597 | 3 | 28.88 | 3        | F3:1396 | OB5938 H3A raw.raw | 0                | 0        | 0                    | 287   | 296 |                      |                                 | PEAKS DB |
| total 6 peptides        |      |        |           |        |     |          |   |       |          |         |                    |                  |          |                      |       |     |                      |                                 |          |

A0A191UJ50|A0A191UJ50\_ARAHY

back to list

| Protein Coverage | Supporting Peptides |

Protein Coverage:



1

MSPQTETKAS VGFKAGVKDY KLTYYTPEYE TKDTDILAAF RVTPQPGVPP EEAGAAVA AE SSGTWTWTVW TDGLTSLDRY

81

KGRCYNIEPV AGEENQYIAY VAYPLDLFEE GSVTNMFTSI VGNVFGFKAL **RALRLEDLRI PISYIKTFQG PPHGIQVERD**

161

KLNKYGRPLL GCTIKPKLGL SAKNYGRAVY ECLRGGLDFT KDDENVNSQP FMRWRDR**FLF CAEAI**FKSQA ETGEIKGHYL

241

NATAGTCEEM IKRAVFAREL GAPIVMHDYL TGGFTANTSL AHYCR**DNGLL LHIH**RAMHAV IDRQKNHGMH FRVLAKALRL

321

SGGDHIHAGT VVGKLEGERD **ITLGFVDLLR DDFIEKDRSR** GIYFTQDWVS LPGVLPVASG GIHVWHMPAL TEIFGDDSVL

401

QFGGGTLGHP WGNAPGAVAN **RVALEACVQA** RNEGRDLARE GNEIIREASK WSPELAAACE VWKAIKFEFP AMDTL

221

C

221

C

427

C

427

C

Carbamidomethylation (+57.02)

Supporting Peptides:

| Peptide                 | Uniq | -10lgP | Mass      | Length | ppm | m/z      | z | RT    | Fraction | Scan    | Source File        | Area Raw Ara h 3 | #Feature | #Feature Raw Ara h 3 | Start | End | PTM                  | AScore                           | Found By |
|-------------------------|------|--------|-----------|--------|-----|----------|---|-------|----------|---------|--------------------|------------------|----------|----------------------|-------|-----|----------------------|----------------------------------|----------|
| R.DITLGFVDLLRDDFIEKDR.S | Y    | 96.63  | 2279.1797 | 19     | 2.4 | 760.7357 | 3 | 38.30 | 3        | F3:1951 | OB5938 H3A raw.raw | 2.0066E5         | 1        | 1                    | 340   | 358 |                      |                                  | PEAKS DB |
| R.ALRLDLRIPISYIK.T      | Y    | 86.70  | 1799.0669 | 15     | 0.5 | 450.7742 | 4 | 34.01 | 3        | F3:1706 | OB5938 H3A raw.raw | 1.0366E6         | 3        | 3                    | 132   | 146 |                      |                                  | PEAKS DB |
| R.VALEAC(+57.02)VQAR.N  | Y    | 84.77  | 1115.5757 | 10     | 3.3 | 558.7969 | 2 | 26.89 | 3        | F3:1278 | OB5938 H3A raw.raw | 0                | 0        | 0                    | 422   | 431 | Carbamidomethylation | C6:Carbamidomethylation:100 0.00 | PEAKS DB |
| K.TFQGPPHGIQVER.D       | Y    | 55.73  | 1464.7473 | 13     | 0.5 | 489.2566 | 3 | 30.19 | 1        | F1:1435 | OB5936 H3A raw.raw | 2.0466E4         | 2        | 2                    | 147   | 159 |                      |                                  | PEAKS DB |
| R.FLFC(+57.02)AEAIK.S   | Y    | 53.81  | 1244.6263 | 10     | 0.8 | 623.3209 | 2 | 36.22 | 3        | F3:1836 | OB5938 H3A raw.raw | 8.051E4          | 1        | 1                    | 218   | 227 | Carbamidomethylation | C4:Carbamidomethylation:100 0.00 | PEAKS DB |
| R.DNGLLLHIHR.A          | Y    | 38.59  | 1186.6571 | 10     | 0.2 | 396.5597 | 3 | 28.88 | 3        | F3:1396 | OB5938 H3A raw.raw | 0                | 0        | 0                    | 286   | 295 |                      |                                  | PEAKS DB |
| total 6 peptides        |      |        |           |        |     |          |   |       |          |         |                    |                  |          |                      |       |     |                      |                                  |          |

O20356|O20356\_ARAHY

back to list

| Protein Coverage | Supporting Peptides |

Protein Coverage:

1

VGFKAGVKDY KLTYYTPEYE TKDTDILAAF RVTPQPGVPP EEAGAAVA AE SSGTWTWTVW TDGLTSLDRY KGRCYNIEPV

81

AGEENQYIAY VAYPLDLFEE GSVTNMFTSI VGNVFGFKAL **RALRLEDLRI PISYIKTFQG PPHGIQVERD** KLNKYGRPLL

161

GCTIKPKLGL SAKNYGRAVY ECLRGGLDFT KDDENVNSQP FMRWRDR**FLF CAEAI**FKSQA ETGEIKGHYL NATAGTCEEM

241

IKRAVFAREL GAPIVMHDYL TGGFTANTSL AHYCR**DNGLL LHIH**RAMHAV IDRQKNHGMH FRVLAKALRL SGGDHIHAGT

321

VVGKLEGERD **ITLGFVDLLR DDFIEKDRSR** GIYFTQDWVS LPGVLPVASG GIHVWHMPAL TEIFGDDSVL QFGGGTLGHP

401

WGNAPGAVAN **RVALEACVQA** RNEGRDLARE GNEIIREASK WSPELAAACE VWKAIKFEFP AMDTL

211

C

211

C

417

C

417

C

Carbamidomethylation (+57.02)

Supporting Peptides:

| Peptide          | Uniq | -10lgP | Mass | Length | ppm | m/z | z | RT | Fraction | Scan | Source File | Area Raw Ara h 3 | #Feature | #Feature Raw Ara h 3 | Start | End | PTM | AScore | Found By |
|------------------|------|--------|------|--------|-----|-----|---|----|----------|------|-------------|------------------|----------|----------------------|-------|-----|-----|--------|----------|
| total 6 peptides |      |        |      |        |     |     |   |    |          |      |             |                  |          |                      |       |     |     |        |          |

| Peptide                 | Uniq | -10lgP | Mass      | Length | ppm | m/z      | z | RT    | Fraction | Scan    | Source File        | Area Raw Ara h 3 | #Feature | #Feature Raw Ara h 3 | Start | End | PTM                  | AScore                           | Found By |
|-------------------------|------|--------|-----------|--------|-----|----------|---|-------|----------|---------|--------------------|------------------|----------|----------------------|-------|-----|----------------------|----------------------------------|----------|
| R.DITLGFVDLLRDDFIEKDR.S | Y    | 96.63  | 2279.1797 | 19     | 2.4 | 760.7357 | 3 | 38.30 | 3        | F3:1951 | OB5938 H3A raw.raw | 2.0066E5         | 1        | 1                    | 330   | 348 |                      |                                  | PEAKS DB |
| R.ALRLLEDLRIPISYIK.T    | Y    | 86.70  | 1799.0669 | 15     | 0.5 | 450.7742 | 4 | 34.01 | 3        | F3:1706 | OB5938 H3A raw.raw | 1.0366E6         | 3        | 3                    | 122   | 136 |                      |                                  | PEAKS DB |
| R.VALEAC(+57.02)VQAR.N  | Y    | 84.77  | 1115.5757 | 10     | 3.3 | 558.7969 | 2 | 26.89 | 3        | F3:1278 | OB5938 H3A raw.raw | 0                | 0        | 0                    | 412   | 421 | Carbamidomethylation | C6:Carbamidomethylation:100 0,00 | PEAKS DB |
| K.TFQGPPHGIQVER.D       | Y    | 55.73  | 1464.7473 | 13     | 0.5 | 489.2566 | 3 | 30.19 | 1        | F1:1435 | OB5936 H3A raw.raw | 2.0466E4         | 2        | 2                    | 137   | 149 |                      |                                  | PEAKS DB |
| R.FLFC(+57.02)AEAIKF.S  | Y    | 53.81  | 1244.6263 | 10     | 0.8 | 623.3209 | 2 | 36.22 | 3        | F3:1836 | OB5938 H3A raw.raw | 8.051E4          | 1        | 1                    | 208   | 217 | Carbamidomethylation | C4:Carbamidomethylation:100 0,00 | PEAKS DB |
| R.DNGLLLHIHR.A          | Y    | 38.59  | 1186.6571 | 10     | 0.2 | 396.5597 | 3 | 28.88 | 3        | F3:1396 | OB5938 H3A raw.raw | 0                | 0        | 0                    | 276   | 285 |                      |                                  | PEAKS DB |
| total 6 peptides        |      |        |           |        |     |          |   |       |          |         |                    |                  |          |                      |       |     |                      |                                  |          |

A0A0R4UXQ1|A0A0R4UXQ1\_ARAHY

back to list

| Protein Coverage | Supporting Peptides |

Protein Coverage:

1

MEKAINRQKV LLHHLNPSSS NVDLSSSSSI FASVCLAGDS AAYQRTGVFG DDVVIVAAAYR TAICKAKRGG FKDTPADDLL

 Carbamidomethylation (+57.02)

81

APVLKAVVEK TNLNPSEVGD IVVGSVLAPG ALRATECRMA AFYAGFPETV PVRTVNRQCS SGLQAVADVA ASIRAGFYEI

161

GIGAGLESMS TNAMGWDGDV NPKVKQFEQA RNCLLPMGVT SENVAQRFGV SRKEQDQAAV ESHRRAAAAT AAGKFKDEII

241

PVSTKIVDPK TGDETPVTIS VDDGIRPNAS VADLGKLPV FKKDGSTTAG NSSQVSDGAG AVLLMKRSTA MQKGLPILGV

321

FRSFSAVGVD PAIMGVGPAA AIPVAVK AAG LELEDDIDLFE INEAFASQFV YCRNKLGLDA EKNVNGGAM ALGHPLGATG



401

ARCTATLLHE MKRRGKDCRF GVISMCI GTG MGAAAVFERG DGVDLSNAR KVATNNLLSK DAR

Supporting Peptides:

| Peptide                                | Uniq | -10lgP | Mass      | Length | ppm | m/z       | z | RT    | Fraction | Scan    | Source File        | Area Raw Ara h 3 | #Feature | #Feature Raw Ara h 3 | Start | End | PTM                  | AScore                           | Found By |
|----------------------------------------|------|--------|-----------|--------|-----|-----------|---|-------|----------|---------|--------------------|------------------|----------|----------------------|-------|-----|----------------------|----------------------------------|----------|
| K.TNLNPSEVGDIVVGSVLAPGALR.A            | Y    | 120.04 | 2277.2329 | 23     | 1.4 | 1139.6254 | 2 | 37.36 | 3        | F3:1898 | OB5938 H3A raw.raw | 4.468E5          | 2        | 2                    | 91    | 113 |                      |                                  | PEAKS DB |
| K.AAGLELDDIDLFEINEAFASQFVYC(+57.02)R.N | Y    | 65.66  | 3005.4116 | 26     | 5.1 | 1503.7207 | 2 | 42.64 | 1        | F1:2172 | OB5936 H3A raw.raw | 2.4389E4         | 1        | 1                    | 348   | 373 | Carbamidomethylation | C25:Carbamidomethylation:1000.00 | PEAKS DB |
| K.TGDETPVTISVDDGIRPNASVADLGK.L         | Y    | 64.47  | 2626.3086 | 26     | 3.0 | 876.4461  | 3 | 32.33 | 2        | F2:1599 | OB5937 H3A raw.raw | 4.6998E5         | 2        | 2                    | 251   | 276 |                      |                                  | PEAKS DB |
| R.GGFKDTPADDLLAPVLK.A                  | Y    | 40.52  | 1755.9407 | 17     | 0.1 | 878.9777  | 2 | 35.69 | 1        | F1:1759 | OB5936 H3A raw.raw | 0                | 0        | 0                    | 69    | 85  |                      |                                  | PEAKS DB |
| total 4 peptides                       |      |        |           |        |     |           |   |       |          |         |                    |                  |          |                      |       |     |                      |                                  |          |

sp|Q647H2|AHY3\_ARAHY

back to list

| Protein Coverage | Supporting Peptides |

Protein Coverage:

1   MAKLLALSVC FCFLVLGASS VTFRQQGEEN ECQFQRLNAQ RPDNCIESEG GYIETWNPNN QEFQCAGVAL SRFVLRNAL  
81   RRPFYSNAPQ EIFIYQSGSY FGLIFPGCPG TFEEPIQGSE QFQRPSRHFQ GQDQSQRPLD THQKVHGFRE GDLIAVPHGV  
161   AFWIYNDQDT DVVAISVLHT NSLHNQLDQF PR**RFNLAGKQ EQEFLR**YQQR SGRQSPKGEE QEQEQENEGG NVFSGFSTEF  
241   LSHGFQVNED IVRNLRGENE REEQGAIVTV KGGLSILVPP EWRQSYQQPG RGDKDFNNGI EETICTATVK MNIGKSTSAD  
321   IYNPQAGSVR TVNELDLPIL NRLGLSAEYG SIHRDAMFVP HYNMNANSMI YALHGGAHVQ VVDCNGNRVF DEELQEGQSL  
401   VVPQNFVAAA KSQSEHFLYV AFKTNRSASI SNLAGKNSYM WNLPEDEVAN SYGLQYEQAR QLKNNNPFTF LVPPQDSQMI  
481   RTVA

Supporting Peptides:

| Peptide          | Uniq | -10lgP | Mass      | Length | ppm  | m/z      | z | RT    | Fraction | Scan    | Source File        | Area Raw Ara h 3 | #Feature | #Feature Raw Ara h 3 | Start | End | PTM | AScore | Found By |
|------------------|------|--------|-----------|--------|------|----------|---|-------|----------|---------|--------------------|------------------|----------|----------------------|-------|-----|-----|--------|----------|
| R.RFNLAGKQEFLR.Y | Y    | 119.18 | 1734.9165 | 14     | -0.3 | 579.3126 | 3 | 30.84 | 5        | F5:1458 | OB5934 H3B raw.raw | 5.0305E5         | 3        | 3                    | 193   | 206 |     |        | PEAKS DB |
| R.FNLAGKQEFLR.Y  | Y    | 72.82  | 1578.8154 | 13     | -0.1 | 790.4149 | 2 | 30.90 | 6        | F6:1458 | OB5935 H3B raw.raw | 4.203E4          | 2        | 2                    | 194   | 206 |     |        | PEAKS DB |
| total 2 peptides |      |        |           |        |      |          |   |       |          |         |                    |                  |          |                      |       |     |     |        |          |

B4UWD5|B4UWD5\_ARAHY

[back to list](#)

| [Protein Coverage](#) | [Supporting Peptides](#) |

Protein Coverage:

1   MARYDR**AITV FSPDGHLFQV EYALEAVR**KG NAAVGVRGTD NVVLGVEKKS TAKLQDSRTV RKIVNLDDHI ALACAGLKAD  
81   ARVLINRARV ECQSHR**LTVE DPVTVEYITR** YIAGLHQSYT QSGGVRPFGL STLIVGF

Supporting Peptides:

| Peptide                    | Uniq | -10lgP | Mass      | Length | ppm | m/z      | z | RT    | Fraction | Scan    | Source File        | Area Raw Ara h 3 | #Feature | #Feature Raw Ara h 3 | Start | End | PTM | AScore | Found By |
|----------------------------|------|--------|-----------|--------|-----|----------|---|-------|----------|---------|--------------------|------------------|----------|----------------------|-------|-----|-----|--------|----------|
| R.LTVEDPVTVEYITR.Y         | Y    | 112.55 | 1633.8563 | 14     | 2.5 | 817.9375 | 2 | 33.34 | 6        | F6:1599 | OB5935 H3B raw.raw | 9.0801E5         | 3        | 3                    | 97    | 110 |     |        | PEAKS DB |
| R.AITVFSPDGHLFQVEYALEAVR.K | Y    | 60.08  | 2461.2642 | 22     | 5.9 | 821.4335 | 3 | 38.74 | 4        | F4:1769 | OB5925 H3B raw.raw | 2.6576E5         | 1        | 1                    | 7     | 28  |     |        | PEAKS DB |
| total 2 peptides           |      |        |           |        |     |          |   |       |          |         |                    |                  |          |                      |       |     |     |        |          |

A5Z1R0|A5Z1R0\_ARAHY

[back to list](#)

| [Protein Coverage](#) | [Supporting Peptides](#) |

Protein Coverage:

1   MAKSTILVAL LALVLVAHAS AMRRERGRQG DSSSCERQVD RVNLKPCEQH IMQR**IMGEQE QYDSYDIR**ST RSSDQQQRCC  Carbamidomethylation (+57.02)  
81   DELNEMENTQ   **RCMCEALQQI MENQCDRLQD**  RQMVQQFKRE LMNLPQQCNF RAPQRCDLDV SGGRC

Supporting Peptides:

| Peptide                                          | Uniq | -10lgP | Mass      | Length | ppm | m/z      | z | RT    | Fraction | Scan    | Source File        | Area Raw Ara h 3 | #Feature | #Feature Raw Ara h 3 | Start | End | PTM                  | AScore                                                                                           | Found By |
|--------------------------------------------------|------|--------|-----------|--------|-----|----------|---|-------|----------|---------|--------------------|------------------|----------|----------------------|-------|-----|----------------------|--------------------------------------------------------------------------------------------------|----------|
| R.IMGEQEYDSYDIR.S                                | Y    | 87.94  | 1745.7566 | 14     | 2.0 | 873.8873 | 2 | 30.24 | 4        | F4:1275 | OB5925 H3B raw.raw | 2.7489E4         | 2        | 2                    | 55    | 68  |                      |                                                                                                  | PEAKS DB |
| R.C(+57.02)MC(+57.02)EALQQIMENQC(+57.02)DRLQDR.Q | Y    | 81.82  | 2597.0913 | 20     | 1.1 | 866.7053 | 3 | 33.67 | 4        | F4:1480 | OB5925 H3B raw.raw | 3.136E5          | 3        | 3                    | 92    | 111 | Carbamidomethylation | C1:Carbamidomethylation:1000.00;C3:Carbamidomethylation:1000.00;C14:Carbamidomethylation:1000.00 | PEAKS DB |
| total 2 peptides                                 |      |        |           |        |     |          |   |       |          |         |                    |                  |          |                      |       |     |                      |                                                                                                  |          |

sp|Q647G9|CONG\_ARAHY

[back to list](#)

| [Protein Coverage](#) | [Supporting Peptides](#) |

Protein Coverage:

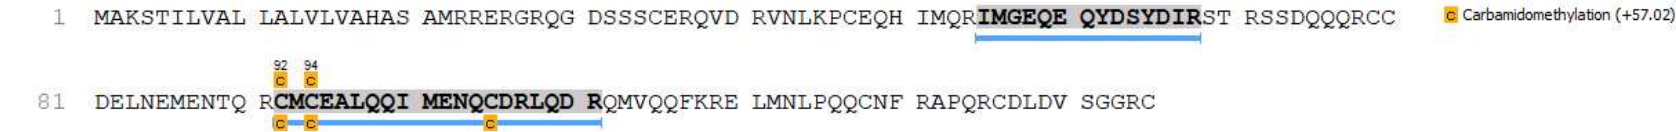

Supporting Peptides:

| Peptide                                          | Uniq | -10lgP | Mass      | Length | ppm | m/z      | z | RT    | Fraction | Scan    | Source File        | Area Raw Ara h 3 | #Feature | #Feature Raw Ara h 3 | Start | End | PTM                  | AScore                                                                                           | Found By |
|--------------------------------------------------|------|--------|-----------|--------|-----|----------|---|-------|----------|---------|--------------------|------------------|----------|----------------------|-------|-----|----------------------|--------------------------------------------------------------------------------------------------|----------|
| R.IMGEQE QYDSYDIR.S                              | Y    | 87.94  | 1745.7566 | 14     | 2.0 | 873.8873 | 2 | 30.24 | 4        | F4:1275 | OB5925 H3B raw.raw | 2.7489E4         | 2        | 2                    | 55    | 68  |                      |                                                                                                  | PEAKS DB |
| R.C(+57.02)MC(+57.02)EALQQIMENQC(+57.02)DRLQDR.Q | Y    | 81.82  | 2597.0913 | 20     | 1.1 | 866.7053 | 3 | 33.67 | 4        | F4:1480 | OB5925 H3B raw.raw | 3.136E5          | 3        | 3                    | 92    | 111 | Carbamidomethylation | C1:Carbamidomethylation:1000.00;C3:Carbamidomethylation:1000.00;C14:Carbamidomethylation:1000.00 | PEAKS DB |
| total 2 peptides                                 |      |        |           |        |     |          |   |       |          |         |                    |                  |          |                      |       |     |                      |                                                                                                  |          |

#CONTAM#P00761

[back to list](#)

| [Protein Coverage](#) | [Supporting Peptides](#) |

Protein Coverage:

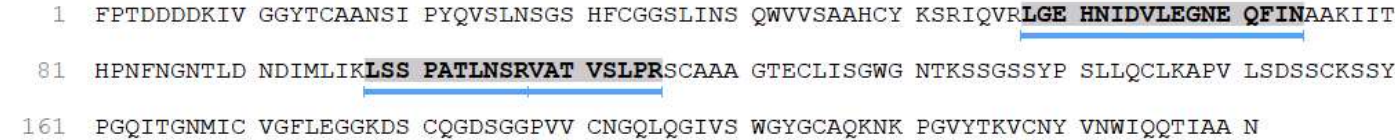

Supporting Peptides:

| Peptide              | Uniq | -10lgP | Mass      | Length | ppm | m/z      | z | RT    | Fraction | Scan    | Source File        | Area Raw Ara h 3 | #Feature | #Feature Raw Ara h 3 | Start | End | PTM | AScore | Found By |
|----------------------|------|--------|-----------|--------|-----|----------|---|-------|----------|---------|--------------------|------------------|----------|----------------------|-------|-----|-----|--------|----------|
| R.LGEHNDVLEQNEQFIN.A | Y    | 70.56  | 1939.9275 | 17     | 2.6 | 970.9735 | 2 | 33.72 | 6        | F6:1622 | OB5935 H3B raw.raw | 1.059E5          | 1        | 1                    | 58    | 74  |     |        | PEAKS DB |
| K.LSSPATLNSR.V       | Y    | 67.10  | 1044.5564 | 10     | 0.1 | 523.2855 | 2 | 25.44 | 2        | F2:1182 | OB5937 H3A raw.raw | 1.0806E4         | 3        | 3                    | 98    | 107 |     |        | PEAKS DB |
| R.VATVSLPR.S         | Y    | 57.08  | 841.5021  | 8      | 2.0 | 421.7592 | 2 | 29.77 | 1        | F1:1403 | OB5936 H3A raw.raw | 1.6733E5         | 5        | 5                    | 108   | 115 |     |        | PEAKS DB |
| total 3 peptides     |      |        |           |        |     |          |   |       |          |         |                    |                  |          |                      |       |     |     |        |          |

E5FHZ2|E5FHZ2\_ARAHY

[back to list](#)

| [Protein Coverage](#) | [Supporting Peptides](#) |

Protein Coverage:

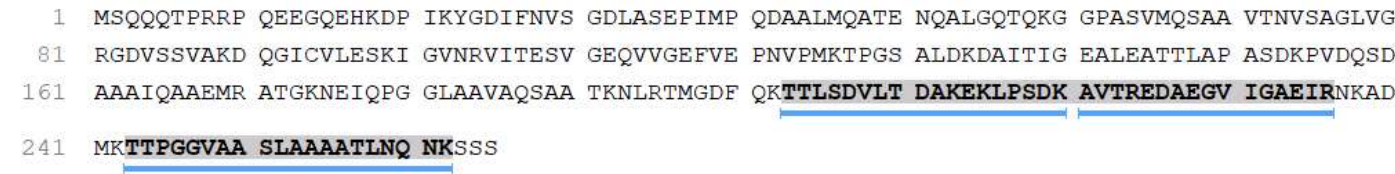

Supporting Peptides:

| Peptide | Uniq | -10lgP | Mass | Length | ppm | m/z | z | RT | Fraction | Scan | Source File | Area Raw Ara h 3 | #Feature | #Feature Raw Ara h 3 | Start | End | PTM | AScore | Found By |
|---------|------|--------|------|--------|-----|-----|---|----|----------|------|-------------|------------------|----------|----------------------|-------|-----|-----|--------|----------|
|---------|------|--------|------|--------|-----|-----|---|----|----------|------|-------------|------------------|----------|----------------------|-------|-----|-----|--------|----------|



| Peptide                 | Uniq | -10lgP | Mass      | Length | ppm | m/z      | z | RT    | Fraction | Scan    | Source File        | Area Raw Ara h 3 | #Feature | #Feature Raw Ara h 3 | Start | End | PTM | AScore | Found By |
|-------------------------|------|--------|-----------|--------|-----|----------|---|-------|----------|---------|--------------------|------------------|----------|----------------------|-------|-----|-----|--------|----------|
| K.TTPGGVAASLAAATLNQNK.S | Y    | 90.39  | 1854.9799 | 20     | 2.2 | 928.4993 | 2 | 33.30 | 4        | F4:1460 | OB5925 H3B raw.raw | 6.4018E4         | 1        | 1                    | 243   | 262 |     |        | PEAKS DB |
| K.TTSLSDVLDAKEKLPSDK.A  | Y    | 35.73  | 1960.0364 | 18     | 0.4 | 654.3530 | 3 | 32.33 | 2        | F2:1595 | OB5937 H3A raw.raw | 7.1006E5         | 1        | 1                    | 203   | 220 |     |        | PEAKS DB |
| K.AVTREDAEGVIGAEIR.N    | Y    | 35.69  | 1684.8744 | 16     | 1.9 | 843.4461 | 2 | 29.50 | 3        | F3:1432 | OB5938 H3A raw.raw | 0                | 0        | 0                    | 221   | 236 |     |        | PEAKS DB |
| total 3 peptides        |      |        |           |        |     |          |   |       |          |         |                    |                  |          |                      |       |     |     |        |          |

Q06H31|Q06H31\_ARAHY

[back to list](#)

| [Protein Coverage](#) | [Supporting Peptides](#) |

Protein Coverage:

1

MLVYQDLLTG DELLSDSFPY KEIENGILWE VEGK

WVIQGA INVDIGANPS AEGGEEDESVD DQAVK

VVDI VDTFRLQEQP

Oxidation (M) (+15.99)

81

AFDKKQFVTY MKRYIKLLTA KLEPEQQEHF KKNIEGATKF LLSKLSDLQF FVGESMHDDG SLVFAYYKEG ATDPTFLYFA

161

HGLKEIKC

Supporting Peptides:

| Peptide                                      | Uniq | -10lgP | Mass      | Length | ppm  | m/z       | z | RT    | Fraction | Scan    | Source File        | Area Raw Ara h 3 | #Feature | #Feature Raw Ara h 3 | Start | End | PTM           | AScore                   | Found By |
|----------------------------------------------|------|--------|-----------|--------|------|-----------|---|-------|----------|---------|--------------------|------------------|----------|----------------------|-------|-----|---------------|--------------------------|----------|
| M(+15.99)LVYQDLLTGDELLSDSFPYKEIENGILWEVEGK.W | Y    | 73.25  | 3958.9436 | 34     | 3.4  | 1320.6597 | 3 | 42.89 | 6        | F6:2152 | OB5935 H3B raw.raw | 4.2504E5         | 2        | 2                    | 1     | 34  | Oxidation (M) | M1:Oxidation (M):1000.00 | PEAKS DB |
| MLVYQDLLTGDELLSDSFPYKEIENGILWEVEGK.W         | Y    | 70.50  | 3942.9487 | 34     | 3.9  | 1315.3286 | 3 | 43.02 | 5        | F5:2174 | OB5934 H3B raw.raw | 5.0903E5         | 2        | 2                    | 1     | 34  |               |                          | PEAKS DB |
| K.VVDIVDTFR.L                                | Y    | 66.45  | 1062.5709 | 9      | -0.3 | 532.2926  | 2 | 32.96 | 6        | F6:1559 | OB5935 H3B raw.raw | 1.3289E4         | 1        | 1                    | 67    | 75  |               |                          | PEAKS DB |
| total 3 peptides                             |      |        |           |        |      |           |   |       |          |         |                    |                  |          |                      |       |     |               |                          |          |

Peptide List

Summary

Ara h 3 GEL BAND ROASTED

1. Notes

Ara h 3 project, sample ROAST Ara h 3 with 6 files, node PTM69.  
The most abundant is Ara h 3 isoform! via XIC aspect.

2. Result Statistics

Figure 1. False discovery rate (FDR) curve. X axis is the number of peptides being kept. Y axis is the corresponding FDR.

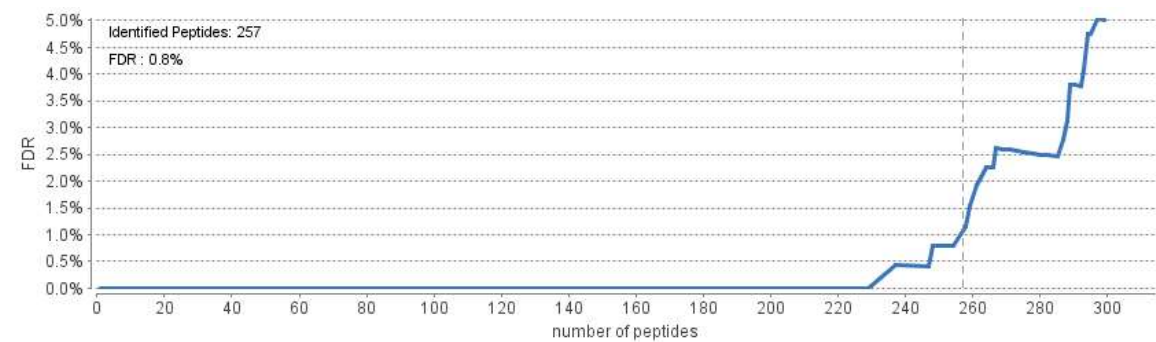

Figure 2. PSM score distribution. (a) Distribution of PEAKS peptide score; (b) Scatterplot of PEAKS peptide score versus precursor mass error.

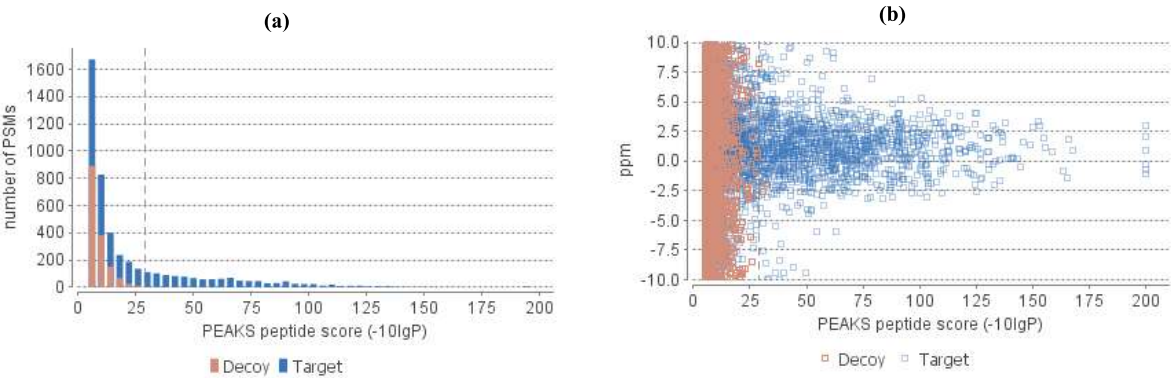

Table 1. Statistics of data.

|       | #Scans |       |          | #Features | Identified |        |             | #Peptides | #Sequences | #Proteins* |     |     |
|-------|--------|-------|----------|-----------|------------|--------|-------------|-----------|------------|------------|-----|-----|
|       | MS1    | MS/MS | #Chimera |           | #PSMs      | #Scans | #Features** |           |            | Groups     | All | Top |
| Total | 14350  | 8619  | 1176     | 15108     | 1216       | 1191   | 672         | 257       | 175        | 20         | 30  | 26  |

|         |       |      |      |       |      |      |     |     |     |    |    |    |
|---------|-------|------|------|-------|------|------|-----|-----|-----|----|----|----|
| Roast   | 14350 | 8619 | 1176 | 15108 | 1216 | 1191 | 672 | 257 | 175 | 20 | 30 | 26 |
| Ara h 3 |       |      |      |       |      |      |     |     |     |    |    |    |

\* proteins with significant peptides are used in counts.  
\*\* features are identified by DB search only.

Figure 3. Sample overlap for Proteins and Peptides (up to 8 samples). (a) All Proteins; (b) Top Proteins; (c) Peptides; ?

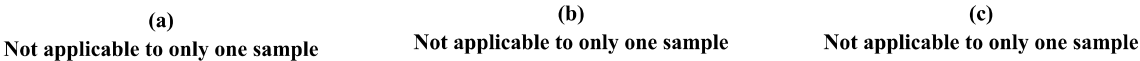

Figure 4. Distribution of peptide feature detection. (a) Feature m/z distribution; (b) Feature RT distribution.

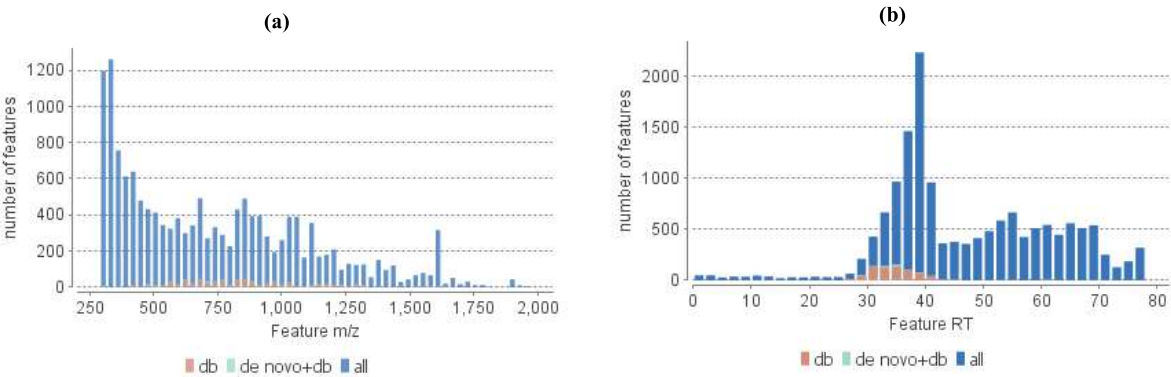

Figure 5. Distribution of identified peptide features. (a) Feature abundance distribution; (b) De novo sequencing validation. ?

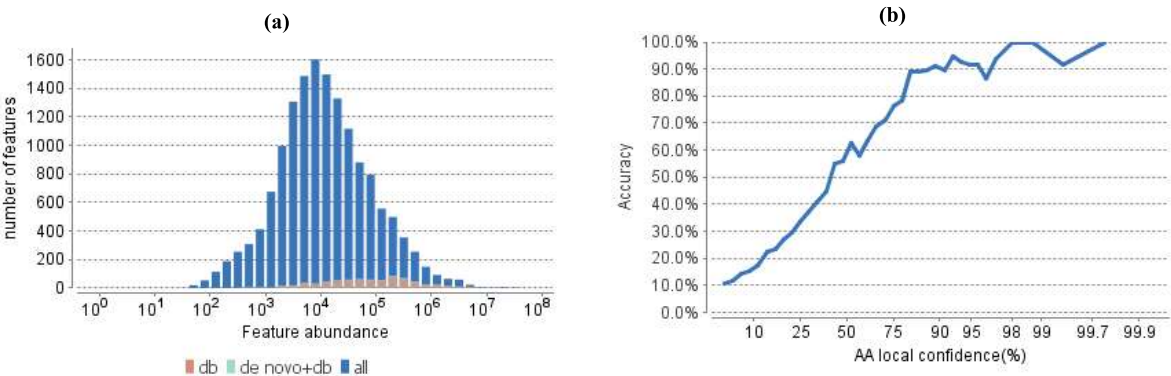

Table 2. Result filtration parameters.

|                          |       |
|--------------------------|-------|
| Peptide -10lgP           | ≥29.1 |
| PTM AScore               | ≥50   |
| Protein -10lgP           | ≥20   |
| Proteins unique peptides | ≥2    |
| De novo score(%)         | ≥50%  |

Table 4. PTM profile.

| Name            | ΔMass | Position | #PSM | -10lgP | Abundance | AScore  |
|-----------------|-------|----------|------|--------|-----------|---------|
| Carbamidomethyl | 57.02 | C        | 173  | 200.00 | 3.47E5    | 1000.00 |
| Oxidation       | 15.99 | M        | 79   | 154.77 | 2.76E5    | 1000.00 |
| Deamidation     | .98   | NQ       | 57   | 78.87  | 5.78E4    | 39.44   |

**Table 3.** Statistics of filtered result.  
FDR (Peptide-Spectrum Matches) 0.2%  
FDR (Peptide Sequences) 0.8%  
FDR (Protein Group) 0.0%  
De Novo Only Spectra 95

|                     |        |           |    |       |        |          |  |
|---------------------|--------|-----------|----|-------|--------|----------|--|
|                     |        |           |    |       |        | proteins |  |
| Carbamidomethyl     | 57.02  | DE,N-term | 22 | 91.10 | 1.24E4 | 1000.00  |  |
| Dimethylation(KR)   | 28.03  | R         | 5  | 90.94 | 1.34E5 | 1000.00  |  |
| SMA                 | 127.06 | N-term    | 5  | 49.60 | 5.17E5 | 1000.00  |  |
| Propionamide        | 71.04  | C         | 4  | 72.57 | 1.78E4 | 1000.00  |  |
| Methylation(others) | 14.02  | H         | 3  | 41.89 | 1.36E5 | 17.01    |  |
| Dihydroxy           | 31.99  | PW        | 3  | 46.85 | 3.33E3 | 17.01    |  |
| Methylation(KR)     | 14.02  | R         | 3  | 32.14 | 2.89E5 | 67.58    |  |
| Ammonia loss        | -17.03 | N-term    | 2  | 30.70 | 1.28E4 | 1000.00  |  |
| Pyro-glu from Q     | -17.03 | N-term    | 2  | 55.02 |        | 1000.00  |  |
| Oxidation           | 15.99  | P         | 1  | 34.29 | 4.33E4 | 32.28    |  |
| HNE                 | 156.12 | H         | 1  | 31.09 | 2.48E5 | 1000.00  |  |
| Ammonia loss        | -17.03 | N         | 1  | 37.32 |        | 0.00     |  |

3. Experiment Control

**Figure 6.** Precursor mass error of peptide-spectrum matches (PSM) in filtered result. **(a)** Distribution of precursor mass error in ppm; **(b)** Scatterplot of precursor m/z versus precursor mass error in ppm.

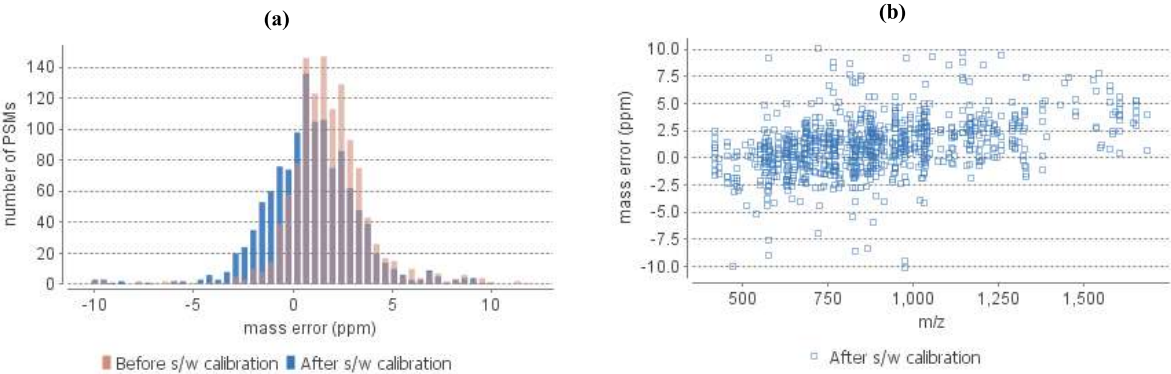

**Table 5.** Number of identified peptides in each sample by the number of missed cleavages.

|                  |     |     |    |   |    |
|------------------|-----|-----|----|---|----|
| Missed Cleavages | 0   | 1   | 2  | 3 | 4+ |
| Roast Ara h 3    | 117 | 110 | 30 | 0 | 0  |

4. Other Information

**Table 6.** Search parameters.  
PEAKS Version: PEAKS Studio 10.6 build 20201015  
Search Engine Name: PEAKS

**Table 7.** Instrument parameters.  
Fractions: OB5951 H3A Ro.raw, OB5952 H3A Ro.raw, OB5953 H3A Ro.  
raw, OB5926 H3B Ro.raw, OB5948 H3B Ro.raw, OB5949 H3B Ro.raw



Parent Mass Error Tolerance: 10.0 ppm  
Fragment Mass Error Tolerance: 0.5 Da  
Precursor Mass Search Type: monoisotopic  
Enzyme: Trypsin  
Max Missed Cleavages: 2  
Digest Mode: Semispecific  
Fixed Modifications:  
  Carbamidomethylation: 57.02  
Variable Modifications:  
  Oxidation (M): 15.99  
  Deamidation (NQ): 0.98  
  Acetylation (K): 42.01  
  Acetylation (Protein N-term): 42.01  
  Acetylation (N-term): 42.01  
  Amidation: -0.98  
  Beta-methylthiolation: 45.99  
  Biotinylation: 226.08  
  and 303 more...  
Max Variable PTM Per Peptide: 5  
Database: Uniprot\_Peanut-3818\_Jul18  
Taxon: All  
Contaminant Database: contam MQ  
Searched Entry: 1723  
FDR Estimation: Enabled  
De novo score(%) threshold: 15  
Peptide hit threshold (-10logP): 30.0  
Peaks run ID: 68  
Merge Options: no merge  
Precursor Options: corrected  
Charge Options: no correction  
Filter m/z: 200.0 - 2000.0  
Filter Charge: 2 - 12  
Process: true  
Associate chimera: yes

Ion Source: ESI(nano-spray)  
Fragmentation Mode: CID, CAD(y and b ions)  
MS Scan Mode: FT-ICR/Orbitrap  
MS/MS Scan Mode: FT-ICR/Orbitrap

Protein List

Protein Accession Contains:  
Protein Description Contains:  
Protein Sample Area >=  
Protein PTM Contains:

| Protein Group     | Protein ID | Accession                                   | -10lgP | Coverage (%) | Coverage (%) Roast Ara h 3 | Area Roast Ara h 3 | #Peptides | #Unique | #Spec Roast Ara h 3 | PTM | Avg. Mass | Description                                                                             |
|-------------------|------------|---------------------------------------------|--------|--------------|----------------------------|--------------------|-----------|---------|---------------------|-----|-----------|-----------------------------------------------------------------------------------------|
| 2                 | 3          | <a href="#">sp P43237 ALL11_ARAHY</a>       | 561.12 | 50           | 50                         | 1.0349E6           | 39        | 2       | 449                 | Y   | 70283     | Allergen Ara h 1, clone P17 OS=Arachis hypogaea OX=3818 PE=1 SV=1                       |
| 2                 | 2          | <a href="#">B3IXL2 B3IXL2_ARAHY</a>         | 561.12 | 50           | 50                         | 1.0349E6           | 39        | 2       | 449                 | Y   | 70283     | Main allergen Ara h1 OS=Arachis hypogaea OX=3818 PE=2 SV=1                              |
| 2                 | 1          | <a href="#">Q6PSU3 Q6PSU3_ARAHY</a>         | 561.12 | 53           | 53                         | 1.0349E6           | 39        | 2       | 449                 | Y   | 66575     | Conarachin (Fragment) OS=Arachis hypogaea OX=3818 PE=4 SV=1                             |
| 1                 | 5          | <a href="#">N1NG13 N1NG13_ARAHY</a>         | 558.94 | 47           | 47                         | 9.6993E5           | 37        | 6       | 452                 | Y   | 71345     | Seed storage protein Ara h1 OS=Arachis hypogaea OX=3818 GN=ARAX_AHF417E07-017 PE=4 SV=1 |
| 1                 | 4          | <a href="#">sp P43238 ALL12_ARAHY</a>       | 558.94 | 47           | 47                         | 9.6993E5           | 37        | 6       | 452                 | Y   | 71345     | Allergen Ara h 1, clone P41B OS=Arachis hypogaea OX=3818 PE=1 SV=1                      |
| 5                 | 9          | <a href="#">A1DZF0 A1DZF0_ARAHY</a>         | 491.39 | 60           | 60                         | 4.4788E6           | 20        | 3       | 166                 | Y   | 60375     | Arachin 6 OS=Arachis hypogaea OX=3818 PE=2 SV=1                                         |
| 11                | 20         | <a href="#">Q38711 Q38711_ARAHY</a>         | 488.55 | 85           | 85                         | 3.3979E5           | 16        | 2       | 128                 | Y   | 29134     | Galactose-binding lectin (Fragment) OS=Arachis hypogaea OX=3818 GN=lec PE=2 S V=1       |
| 13                | 21         | <a href="#">A0A089ZXL7 A0A089ZXL7_ARAHY</a> | 466.25 | 77           | 77                         | 2.7476E5           | 14        | 2       | 90                  | Y   | 29407     | Peanut agglutinin variant OS=Arachis hypogaea OX=3818 PE=2 SV=1                         |
| 9                 | 17         | <a href="#">Q516T2 Q516T2_ARAHY</a>         | 453.37 | 43           | 43                         | 4.3973E5           | 16        | 2       | 145                 | Y   | 60736     | Arachin Ahy-4 OS=Arachis hypogaea OX=3818 PE=2 SV=1                                     |
| 12                | 25         | <a href="#">A1E2B0 A1E2B0_ARAHY</a>         | 350.42 | 63           | 63                         | 1.3012E7           | 12        | 10      | 91                  | Y   | 33520     | 11S seed storage globulin B1 OS=Arachis hypogaea OX=3818 PE=2 SV=1                      |
| total 26 proteins |            |                                             |        |              |                            |                    |           |         |                     |     |           |                                                                                         |

| Protein Group     | Protein ID | Accession                             | -10lgP | Coverage (%) | Coverage (%) Roast Ara h 3 | Area Roast Ara h 3 | #Peptides | #Unique | #Spec Roast Ara h 3 | PTM | Avg. Mass | Description                                                                                         |
|-------------------|------------|---------------------------------------|--------|--------------|----------------------------|--------------------|-----------|---------|---------------------|-----|-----------|-----------------------------------------------------------------------------------------------------|
| 16                | 41         | <a href="#">E9LFE8 E9LFE8_ARAHY</a>   | 336.44 | 47           | 47                         | 2.9081E6           | 9         | 7       | 37                  | Y   | 28290     | 11S arachin (Fragment) OS=Arachis hypogaea OX=3818 PE=2 SV=1                                        |
| 14                | 27         | <a href="#">Q6IWG5 Q6IWG5_ARAHY</a>   | 310.98 | 35           | 35                         | 2.7033E7           | 12        | 11      | 72                  | Y   | 58061     | Glycinin (Fragment) OS=Arachis hypogaea OX=3818 PE=2 SV=1                                           |
| 14                | 28         | <a href="#">Q0GM57 Q0GM57_ARAHY</a>   | 310.98 | 35           | 35                         | 2.7033E7           | 12        | 11      | 72                  | Y   | 58263     | Iso-Ara h3 OS=Arachis hypogaea OX=3818 PE=2 SV=1                                                    |
| 19                | 42         | <a href="#">E9LFE9 E9LFE9_ARAHY</a>   | 228.62 | 26           | 26                         | 1.9022E6           | 4         | 4       | 23                  | Y   | 28300     | 11S arachin OS=Arachis hypogaea OX=3818 PE=2 SV=1                                                   |
| 17                | 53         | <a href="#">A5Z1R0 A5Z1R0_ARAHY</a>   | 216.49 | 34           | 34                         | 1.4416E5           | 4         | 4       | 37                  | Y   | 16920     | Ara h 6 allergen OS=Arachis hypogaea OX=3818 GN=Ara h 6 PE=4 SV=1                                   |
| 17                | 52         | <a href="#">sp Q647G9 CONG_ARAHY</a>  | 216.49 | 34           | 34                         | 1.4416E5           | 4         | 4       | 37                  | Y   | 16920     | Conglutin OS=Arachis hypogaea OX=3818 PE=1 SV=1                                                     |
| 21                | 44         | <a href="#">#CONTAM#P04264</a>        | 191.54 | 10           | 10                         | 1.9341E5           | 4         | 3       | 12                  | N   | 66018     | SWISS-PROT: #CONTAM#P04264 Tax_Id=9606 Gene_Symbol=KRT1 Keratin, type II c ytoskeletal 1            |
| 23                | 50         | <a href="#">sp Q647H2 AHY3_ARAHY</a>  | 181.13 | 11           | 11                         | 3.8077E5           | 4         | 3       | 9                   | Y   | 54569     | Arachin Ahv-3 OS=Arachis hypogaea OX=3818 PE=1 SV=1                                                 |
| 22                | 45         | <a href="#">#CONTAM#P13645</a>        | 175.75 | 15           | 15                         | 1.1312E6           | 4         | 4       | 10                  | Y   | 59511     | SWISS-PROT: #CONTAM#P13645 Tax_Id=9606 Gene_Symbol=KRT10 Keratin, type I cytoskeletal 10            |
| 24                | 56         | <a href="#">E5FHZ1 E5FHZ1_ARAHY</a>   | 163.46 | 27           | 27                         | 9.4991E5           | 2         | 2       | 8                   | N   | 22636     | Late embryogenesis abundant protein group 5 protein OS=Arachis hypogaea OX=3818 GN=LEA5-1 PE=2 SV=1 |
| 24                | 49         | <a href="#">N1NKG9 N1NKG9_ARAHY</a>   | 163.46 | 23           | 23                         | 9.4991E5           | 2         | 2       | 8                   | N   | 26041     | Seed maturation protein OS=Arachis hypogaea OX=3818 GN=ARAX_AHF417E07-003 PE=4 SV=1                 |
| 18                | 47         | <a href="#">sp Q6PSU2 CONG7_ARAHY</a> | 143.91 | 33           | 33                         | 1.0478E6           | 4         | 4       | 30                  | Y   | 20114     | Conglutin-7 OS=Arachis hypogaea OX=3818 PE=1 SV=2                                                   |
| 27                | 55         | <a href="#">#CONTAM#P35908</a>        | 129.42 | 4            | 4                          | 3.8507E4           | 2         | 2       | 4                   | N   | 65865     | SWISS-PROT: #CONTAM#P35908 Tax_Id=9606 Gene_Symbol=KRT2 Keratin, type II c ytoskeletal 2 epidermal  |
| 20                | 58         | <a href="#">#CONTAM#P00761</a>        | 127.73 | 12           | 12                         | 3.0738E5           | 3         | 3       | 16                  | N   | 24409     | SWISS-PROT: #CONTAM#P00761 TRYP_PIG Trypsin - Sus scrofa (Pig).                                     |
| 25                | 105        | <a href="#">A1E2B1 A1E2B1_ARAHY</a>   | 126.24 | 13           | 13                         | 1.1946E5           | 2         | 2       | 6                   | N   | 31268     | 11S seed storage globulin B2 OS=Arachis hypogaea OX=3818 PE=2 SV=1                                  |
| 31                | 46         | <a href="#">Q42515 Q42515_ARAHY</a>   | 90.44  | 14           | 14                         | 2.7447E4           | 2         | 2       | 2                   | N   | 28924     | Chitinase (Class II) OS=Arachis hypogaea OX=3818 GN=chi2;2 PE=2 SV=1                                |
| total 26 proteins |            |                                       |        |              |                            |                    |           |         |                     |     |           |                                                                                                     |

[sp|P43237|ALL11\\_ARAHY](#)

[back to list](#)

| [Protein Coverage](#) | [Supporting Peptides](#) |

Protein Coverage:

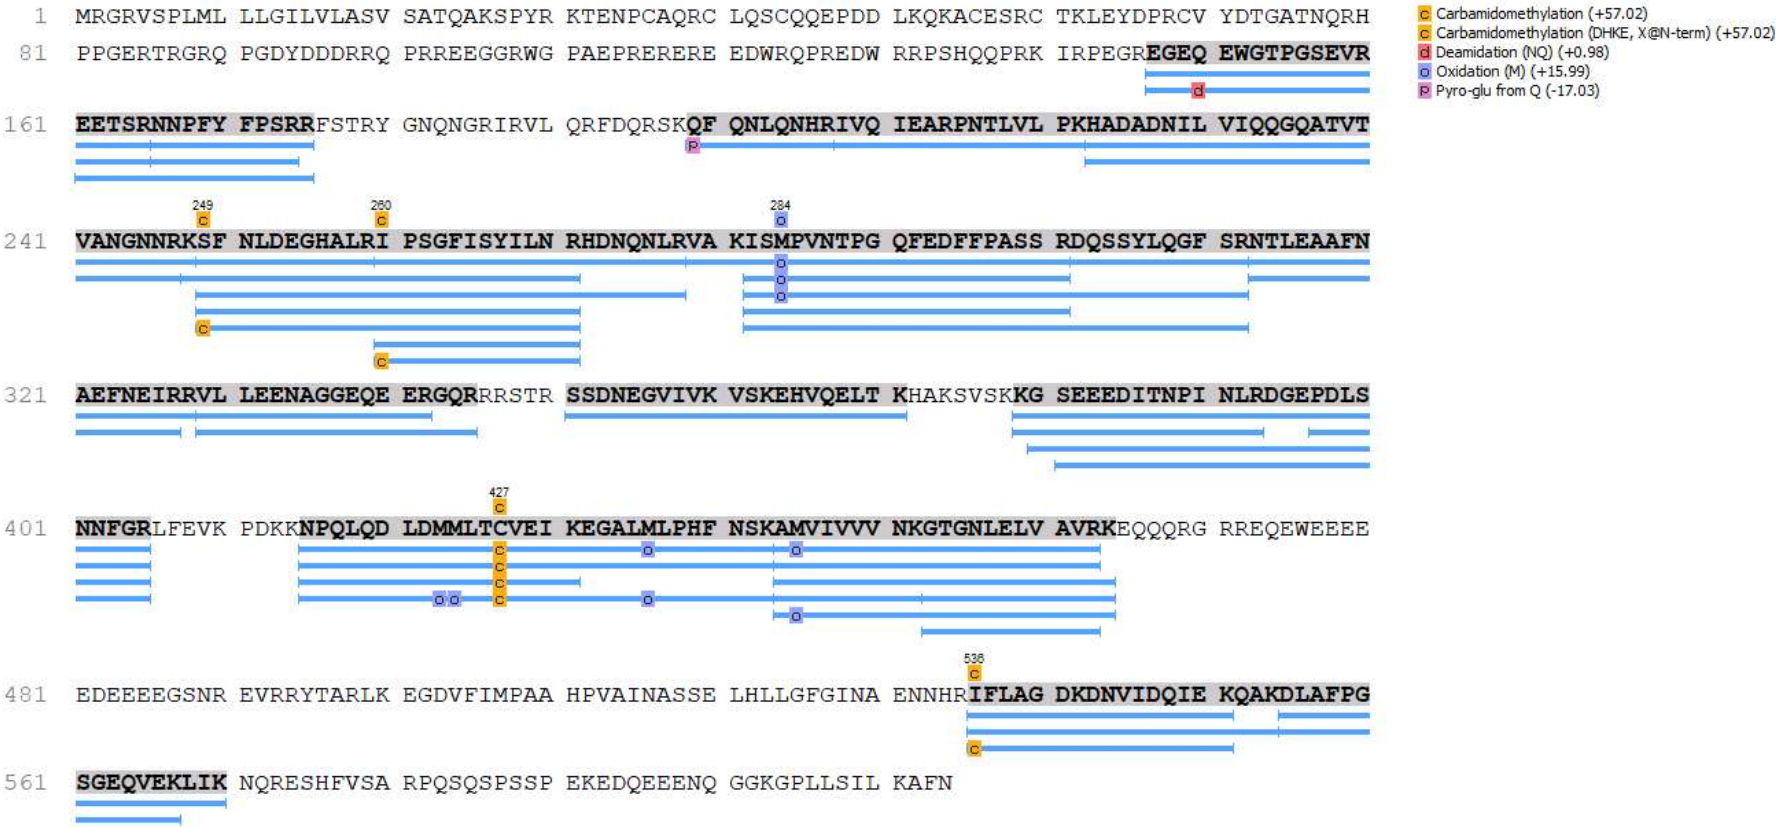

Supporting Peptides:

| Peptide                          | Uniq | -10lgP | Mass      | Length | ppm  | m/z       | z | RT    | Fraction | Scan     | Source File       | Area Roast Ara h 3 | #Feature | #Feature Roast Ara h 3 | Start | End | PTM           | AScore                   | Found By |
|----------------------------------|------|--------|-----------|--------|------|-----------|---|-------|----------|----------|-------------------|--------------------|----------|------------------------|-------|-----|---------------|--------------------------|----------|
| K.ISMPVNTPGQFEDFFPASSR.D         | N    | 200.00 | 2226.0415 | 20     | 2.0  | 1114.0303 | 2 | 35.53 | 7        | F7:1725  | OB5951 H3A Ro.raw | 8.7598E5           | 6        | 6                      | 282   | 301 |               |                          | PEAKS DB |
| R.NTLEAAFNAEFNEIR.R              | N    | 165.72 | 1737.8322 | 15     | 1.8  | 869.9249  | 2 | 35.34 | 7        | F7:1714  | OB5951 H3A Ro.raw | 1.3226E6           | 6        | 6                      | 313   | 327 |               |                          | PEAKS DB |
| K.ISM(+15.99)PVNTPGQFEDFFPASSR.D | N    | 154.77 | 2242.0364 | 20     | 1.9  | 1122.0276 | 2 | 34.42 | 9        | F9:1655  | OB5953 H3A Ro.raw | 9.4493E5           | 6        | 5                      | 282   | 301 | Oxidation (M) | M3:Oxidation (M):1000.00 | PEAKS DB |
| R.IPSGFISYILNR.H                 | N    | 136.44 | 1378.7609 | 12     | 2.2  | 690.3892  | 2 | 37.11 | 9        | F9:1819  | OB5953 H3A Ro.raw | 5.8838E6           | 6        | 6                      | 260   | 271 |               |                          | PEAKS DB |
| K.SFNLDEGHALRIPSGFISYILNR.H      | N    | 130.32 | 2618.3604 | 23     | 0.7  | 873.7969  | 3 | 39.49 | 10       | F10:1795 | OB5926 H3B Ro.raw | 2.1577E7           | 15       | 15                     | 249   | 271 |               |                          | PEAKS DB |
| R.IFLAGDKDNVIDQIEK.Q             | N    | 127.66 | 1816.9570 | 16     | -1.4 | 909.4865  | 2 | 33.07 | 11       | F11:1576 | OB5948 H3B Ro.raw | 3.3211E6           | 12       | 11                     | 536   | 551 |               |                          | PEAKS DB |
| R.DQSSYLQGFNR.N                  | N    | 125.12 | 1286.5891 | 11     | -2.6 | 644.3015  | 2 | 30.77 | 11       | F11:1443 | OB5948 H3B Ro.raw | 3.7573E5           | 6        | 6                      | 302   | 312 |               |                          | PEAKS DB |

total 63 peptides

| Peptide                              | Uniq | -10lgP | Mass      | Length | ppm  | m/z       | z | RT    | Fraction | Scan     | Source File       | Area Roast Ara h 3 | #Feature | #Feature Roast Ara h 3 | Start | End | PTM                                   | AScore                                           | Found By  |
|--------------------------------------|------|--------|-----------|--------|------|-----------|---|-------|----------|----------|-------------------|--------------------|----------|------------------------|-------|-----|---------------------------------------|--------------------------------------------------|-----------|
| K.KGSEEDITNPINLRDGEPLSNNFGR.L        | N    | 113.18 | 3015.4170 | 27     | 1.8  | 754.8629  | 4 | 31.56 | 9        | F9:1480  | OB5953 H3A Ro.raw | 4.7042E5           | 11       | 11                     | 379   | 405 |                                       |                                                  | PEAKS DB  |
| K.SFNLDEGHALR.I                      | N    | 110.09 | 1257.6101 | 11     | -2.6 | 629.8120  | 2 | 29.12 | 11       | F11:1344 | OB5948 H3B Ro.raw | 1.3894E5           | 10       | 10                     | 249   | 259 |                                       |                                                  | PEAKS DB  |
| K.DLAFPGSGEQVEKLIK.N                 | N    | 103.34 | 1729.9249 | 16     | -1.4 | 865.9703  | 2 | 33.26 | 11       | F11:1597 | OB5948 H3B Ro.raw | 3.9305E5           | 5        | 4                      | 555   | 570 |                                       |                                                  | PEAKS DB  |
| K.GSEEDITNPINLRDGEPLSNNFGR.L         | N    | 102.75 | 2887.3220 | 26     | 1.4  | 963.4493  | 3 | 32.29 | 7        | F7:1538  | OB5951 H3A Ro.raw | 4.5249E5           | 6        | 6                      | 380   | 405 |                                       |                                                  | PEAKS DB  |
| R.VLLEENAGGEQEER.G                   | N    | 102.67 | 1571.7427 | 14     | 2.2  | 786.8804  | 2 | 27.19 | 9        | F9:1251  | OB5953 H3A Ro.raw | 9.5555E3           | 3        | 3                      | 329   | 342 |                                       |                                                  | PEAKS DB  |
| R.IFLAGDKDNVIDQIEKQAK.D              | N    | 100.84 | 2144.1477 | 19     | -0.2 | 715.7245  | 3 | 33.83 | 11       | F11:1613 | OB5948 H3B Ro.raw | 1.8641E6           | 6        | 6                      | 536   | 554 |                                       |                                                  | PEAKS DB  |
| R.NTLEAAFNAEFNEIRR.V                 | N    | 96.95  | 1893.9332 | 16     | 2.8  | 947.9765  | 2 | 34.01 | 7        | F7:1637  | OB5951 H3A Ro.raw | 3.4558E7           | 12       | 11                     | 313   | 328 |                                       |                                                  | PEAKS DB  |
| K.NPQLQDLDMMLTC(+57.02)VEIK.E        | N    | 94.07  | 2046.9788 | 17     | 3.3  | 1024.5000 | 2 | 36.94 | 7        | F7:1805  | OB5951 H3A Ro.raw | 0                  | 0        | 0                      | 415   | 431 | Carbamidomethylation                  | C13:Carbamidomethylation:1000.00                 | PEAKS DB  |
| R.IPSGFISYILNRHDNQNL.R.V             | N    | 93.37  | 2256.1763 | 19     | 0.1  | 565.0514  | 4 | 35.73 | 7        | F7:1716  | OB5951 H3A Ro.raw | 8.2074E6           | 11       | 11                     | 260   | 278 |                                       |                                                  | PEAKS DB  |
| R.I(+57.02)PSGFISYILNR.H             | N    | 91.10  | 1435.7823 | 12     | 0.7  | 718.8989  | 2 | 36.87 | 7        | F7:1795  | OB5951 H3A Ro.raw | 7.2345E4           | 3        | 3                      | 260   | 271 | Carbamidomethylation (DHKE, X@N-term) | I1:Carbamidomethylation (DHKE, X@N-term):1000.00 | PEAKS PTM |
| R.NNPFYFPSRR.F                       | N    | 90.91  | 1296.6364 | 10     | 0.1  | 649.3255  | 2 | 30.10 | 9        | F9:1398  | OB5953 H3A Ro.raw | 4.2765E5           | 8        | 8                      | 166   | 175 |                                       |                                                  | PEAKS DB  |
| K.GTGNLELVAVR.K                      | N    | 87.71  | 1127.6299 | 11     | 4.8  | 564.8250  | 2 | 30.09 | 9        | F9:1403  | OB5953 H3A Ro.raw | 2.2478E3           | 1        | 1                      | 453   | 463 |                                       |                                                  | PEAKS DB  |
| K.AM(+15.99)VIVVVNKG TGNLELVAVR.K    | N    | 87.55  | 2097.1980 | 20     | 1.6  | 1049.6079 | 2 | 32.67 | 7        | F7:1560  | OB5951 H3A Ro.raw | 2.6865E5           | 3        | 3                      | 444   | 463 | Oxidation (M)                         | M2:Oxidation (M):1000.00                         | PEAKS DB  |
| K.DLAFPGSGEQVEK.L                    | N    | 85.86  | 1375.6619 | 13     | -0.7 | 688.8392  | 2 | 30.28 | 11       | F11:1414 | OB5948 H3B Ro.raw | 1.4145E5           | 4        | 4                      | 555   | 567 |                                       |                                                  | PEAKS DB  |
| K.AMVIVVVNKG TGNLELVAVR.K            | N    | 83.81  | 2081.2031 | 20     | 1.7  | 1041.6106 | 2 | 34.96 | 7        | F7:1704  | OB5951 H3A Ro.raw | 2.013E6            | 4        | 4                      | 444   | 463 |                                       |                                                  | PEAKS DB  |
| R.NNPFYFPSR.R                        | N    | 81.75  | 1140.5352 | 9      | 0.1  | 571.2749  | 2 | 31.76 | 8        | F8:1498  | OB5952 H3A Ro.raw | 1.1774E5           | 3        | 3                      | 166   | 174 |                                       |                                                  | PEAKS DB  |
| K.SFNLDEGHALRIPSGFISYILNRHDNQNL.R.V  | N    | 79.13  | 3495.7759 | 30     | 1.5  | 700.1635  | 5 | 39.97 | 9        | F9:1987  | OB5953 H3A Ro.raw | 2.0697E7           | 15       | 15                     | 249   | 278 |                                       |                                                  | PEAKS DB  |
| K.HADADNILVIQGGQATVTVAN(+.98)GNNRK.S | N    | 78.05  | 2747.3950 | 26     | 1.8  | 916.8073  | 3 | 30.31 | 8        | F8:1428  | OB5952 H3A Ro.raw | 8.0166E4           | 3        | 3                      | 223   | 248 |                                       | N21:Deamidation (NQ):14.04                       | PEAKS DB  |
| G.SEEEDITNPINLRDGEPLSNNFGR.L         | N    | 77.06  | 2830.3005 | 25     | -1.5 | 944.4417  | 3 | 33.02 | 10       | F10:1421 | OB5926 H3B Ro.raw | 1.3758E5           | 3        | 3                      | 381   | 405 |                                       |                                                  | PEAKS DB  |
| K.AMVIVVVNKG TGNLELVAVR.K.E          | N    | 75.76  | 2209.2981 | 21     | -1.5 | 737.4407  | 3 | 35.66 | 10       | F10:1586 | OB5926 H3B Ro.raw | 3.5137E6           | 8        | 8                      | 444   | 464 |                                       |                                                  | PEAKS DB  |
| K.ISMPVNTPGQFEDFFPASSRDQSSYLQGFSR.N  | N    | 74.46  | 3494.6201 | 31     | 0.8  | 1165.8840 | 3 | 36.12 | 11       | F11:1762 | OB5948 H3B Ro.raw | 2.9084E6           | 5        | 5                      | 282   | 312 |                                       |                                                  | PEAKS DB  |
| total 63 peptides                    |      |        |           |        |      |           |   |       |          |          |                   |                    |          |                        |       |     |                                       |                                                  |           |

| Peptide                                           | Uniq | -10lgP | Mass      | Length | ppm  | m/z       | z | RT    | Fraction | Scan     | Source File       | Area Roast Ara h 3 | #Feature | #Feature Roast Ara h 3 | Start | End | PTM                                   | AScore                                                   | Found By  |
|---------------------------------------------------|------|--------|-----------|--------|------|-----------|---|-------|----------|----------|-------------------|--------------------|----------|------------------------|-------|-----|---------------------------------------|----------------------------------------------------------|-----------|
| R.IVQIEARPNTLVLPK.H                               | Y    | 72.30  | 1690.0140 | 15     | 1.0  | 564.3458  | 3 | 30.81 | 8        | F8:1446  | OB5952 H3A Ro.raw | 1.034E6            | 12       | 12                     | 208   | 222 |                                       |                                                          | PEAKS DB  |
| R.KSFNLDEGHALRIPSGFISYLNR.H                       | N    | 70.24  | 2746.4553 | 24     | 1.8  | 687.6223  | 4 | 39.03 | 8        | F8:1914  | OB5952 H3A Ro.raw | 3.7974E5           | 2        | 2                      | 248   | 271 |                                       |                                                          | PEAKS DB  |
| R.I(+57.02)FLAGDKDNVIDQIEK.Q                      | N    | 66.79  | 1873.9785 | 16     | -2.1 | 937.9969  | 2 | 33.39 | 10       | F10:1458 | OB5926 H3B Ro.raw | 2.2898E4           | 1        | 1                      | 536   | 551 | Carbamidomethylation (DHKE, X@N-term) | I1:Carbamidomethylation (D HKE, X@N-term):56.99          | PEAKS PTM |
| K.HADADNIIQQGQATVTVANGNNR.K                       | N    | 65.50  | 2618.3162 | 25     | 0.5  | 873.7798  | 3 | 30.34 | 7        | F7:1426  | OB5951 H3A Ro.raw | 1.8654E3           | 1        | 1                      | 223   | 247 |                                       |                                                          | PEAKS DB  |
| K.HADADNIIQQGQATVTVANGNNRK.S                      | N    | 62.55  | 2746.4111 | 26     | 0.2  | 916.4778  | 3 | 29.66 | 7        | F7:1385  | OB5951 H3A Ro.raw | 6.7701E4           | 2        | 2                      | 223   | 248 |                                       |                                                          | PEAKS DB  |
| K.ISM(+15.99)PVNTPGQFEDFFPASSRDQSSYLQGFSR.N       | N    | 62.16  | 3510.6150 | 31     | -1.8 | 1171.2126 | 3 | 35.35 | 11       | F11:1707 | OB5948 H3B Ro.raw | 2.4799E6           | 5        | 5                      | 282   | 312 | Oxidation (M)                         | M3:Oxidation (M):1000.00                                 | PEAKS DB  |
| R.EETSRNPFYFPSRR.F                                | N    | 62.14  | 1898.9023 | 15     | -0.7 | 633.9758  | 3 | 30.73 | 10       | F10:1288 | OB5926 H3B Ro.raw | 1.7594E4           | 1        | 1                      | 161   | 175 |                                       |                                                          | PEAKS DB  |
| K.NPQLQDLDMMLTC(+57.02)VEIKEGALMLPHFNSK.A         | N    | 59.27  | 3371.6387 | 29     | -0.3 | 843.9188  | 4 | 39.49 | 10       | F10:1807 | OB5926 H3B Ro.raw | 8.6484E5           | 3        | 3                      | 415   | 443 | Carbamidomethylation                  | C13:Carbamidomethylation:1000.00                         | PEAKS DB  |
| K.KGSEEDITNPINLR.D                                | N    | 58.67  | 1713.8533 | 15     | 2.3  | 572.2930  | 3 | 29.61 | 9        | F9:1375  | OB5953 H3A Ro.raw | 1.9283E3           | 1        | 1                      | 379   | 393 |                                       |                                                          | PEAKS DB  |
| K.NPQLQDLDMMLTC(+57.02)VEIKEGALM(+15.99)LPHFNSK.A | N    | 58.64  | 3387.6335 | 29     | 1.2  | 847.9185  | 4 | 38.07 | 11       | F11:1874 | OB5948 H3B Ro.raw | 3.9631E5           | 2        | 2                      | 415   | 443 | Carbamidomethylation; Oxidation (M)   | C13:Carbamidomethylation:1000.00;M22:Oxidation (M):51.99 | PEAKS DB  |
| K.NPQLQDLDM(+15.99)MLTC(+57.02)VEIK.E             | N    | 57.29  | 2062.9736 | 17     | 2.8  | 1032.4969 | 2 | 36.63 | 9        | F9:1780  | OB5953 H3A Ro.raw | 0                  | 0        | 0                      | 415   | 431 | Carbamidomethylation                  | M9:Oxidation (M):24.44;C13:Carbamidomethylation:1000.00  | PEAKS DB  |
| R.NTLEAAFN(+.98)AEFNEIRR.V                        | N    | 56.23  | 1894.9172 | 16     | 0.4  | 948.4663  | 2 | 32.13 | 9        | F9:1524  | OB5953 H3A Ro.raw | 1.3345E4           | 2        | 2                      | 313   | 328 |                                       | N8:Deamidation (NQ):20.76                                | PEAKS DB  |
| R.VLLEENAGGEQEERQGR.R                             | N    | 52.47  | 1912.9238 | 17     | -2.1 | 638.6472  | 3 | 28.03 | 8        | F8:1297  | OB5952 H3A Ro.raw | 8.2166E3           | 2        | 2                      | 329   | 345 |                                       |                                                          | PEAKS DB  |
| R.NTLEAAFNAEFN(+.98)EIRR.V                        | N    | 50.81  | 1894.9172 | 16     | 1.9  | 948.4677  | 2 | 32.67 | 7        | F7:1563  | OB5951 H3A Ro.raw | 9.2576E4           | 2        | 2                      | 313   | 328 |                                       | N12:Deamidation (NQ):8.26                                | PEAKS DB  |
| K.HADADNIIQQGQATVTVANGN(+.98)NRK.S                | N    | 50.48  | 2747.3950 | 26     | -4.1 | 916.8038  | 3 | 30.36 | 11       | F11:1426 | OB5948 H3B Ro.raw | 0                  | 0        | 0                      | 223   | 248 |                                       | N23:Deamidation (NQ):9.40                                | PEAKS DB  |
| K.S(+57.02)FNLDEGHALRIPSGFISYLNR.H                | N    | 49.55  | 2675.3818 | 23     | 2.3  | 892.8033  | 3 | 39.35 | 7        | F7:1901  | OB5951 H3A Ro.raw | 6.7035E5           | 1        | 1                      | 249   | 271 | Carbamidomethylation (DHKE, X@N-term) | S1:Carbamidomethylation (D HKE, X@N-term):63.97          | PEAKS PTM |
| R.IFLAGD(+57.02)KDNVIDQIEK.Q                      | N    | 45.63  | 1873.9785 | 16     | 1.4  | 937.9978  | 2 | 33.53 | 12       | F12:1622 | OB5949 H3B Ro.raw | 3.5356E3           | 1        | 1                      | 536   | 551 |                                       | D6:Carbamidomethylation (D HKE, X@N-term):15.57          | PEAKS PTM |
| K.HADADNIIQQGQ(+.98)ATVTVANGNNRK.S                | N    | 45.21  | 2747.3950 | 26     | 2.6  | 916.8103  | 3 | 30.46 | 10       | F10:1280 | OB5926 H3B Ro.raw | 0                  | 0        | 0                      | 223   | 248 |                                       | Q14:Deamidation (NQ):0.00                                | PEAKS DB  |
| K.AM(+15.99)VIVVVNKG TGNLELVAVRK.E                | N    | 45.01  | 2225.2930 | 21     | -1.5 | 742.7723  | 3 | 33.77 | 10       | F10:1559 | OB5926 H3B Ro.raw | 4.0307E5           | 2        | 2                      | 444   | 464 | Oxidation (M)                         | M2:Oxidation (M):1000.00                                 | PEAKS DB  |

total 63 peptides

| Peptide                                                           | Uniq | -10lgP | Mass      | Length | ppm  | m/z      | z | RT    | Fraction | Scan     | Source File       | Area Roast Ara h 3 | #Feature | #Feature Roast Ara h 3 | Start | End | PTM                                 | AScore                                                                                                        | Found By  |
|-------------------------------------------------------------------|------|--------|-----------|--------|------|----------|---|-------|----------|----------|-------------------|--------------------|----------|------------------------|-------|-----|-------------------------------------|---------------------------------------------------------------------------------------------------------------|-----------|
| R.VAKISM(+15.99)PVNTPGQFEDFFPASSR.D                               | N    | 44.60  | 2540.2368 | 23     | 3.4  | 847.7558 | 3 | 33.41 | 8        | F8:1598  | OB5952 H3A Ro.raw | 0                  | 0        | 0                      | 279   | 301 | Oxidation (M)                       | M6:Oxidation (M):1000.00                                                                                      | PEAKS DB  |
| K.AMVIVVVK.G                                                      | N    | 42.66  | 971.5837  | 9      | -3.0 | 486.7977 | 2 | 29.40 | 7        | F7:1370  | OB5951 H3A Ro.raw | 0                  | 0        | 0                      | 444   | 452 |                                     |                                                                                                               | PEAKS DB  |
| R.N(+.98)TLEAAFNAEFNEIRR.V                                        | N    | 42.24  | 1894.9172 | 16     | 3.2  | 948.4689 | 2 | 33.46 | 8        | F8:1601  | OB5952 H3A Ro.raw | 5.9553E4           | 1        | 1                      | 313   | 328 |                                     | N1:Deamidation (NQ):34.75                                                                                     | PEAKS DB  |
| K.NPQLQLDLM(+15.99)M(+15.99)LTC(+57.02)VEIKEGALM(+15.99)LPHFNSK.A | N    | 39.18  | 3419.6233 | 29     | 1.7  | 855.9146 | 4 | 35.97 | 8        | F8:1751  | OB5952 H3A Ro.raw | 6.0894E4           | 1        | 1                      | 415   | 443 | Oxidation (M); Carbamidomethylation | M9:Oxidation (M):1000.00;M10:Oxidation (M):1000.00;C13:Carbamidomethylation:1000.00;M22:Oxidation (M):1000.00 | PEAKS DB  |
| R.EGEQEWGTPGSEVREETSR.N                                           | Y    | 38.57  | 2161.9512 | 19     | -7.0 | 721.6542 | 3 | 28.61 | 11       | F11:1321 | OB5948 H3B Ro.raw | 0                  | 0        | 0                      | 147   | 165 |                                     |                                                                                                               | PEAKS DB  |
| E.PDLSNNFGR.L                                                     | N    | 38.29  | 1018.4832 | 9      | 1.2  | 510.2495 | 2 | 31.26 | 7        | F7:1478  | OB5951 H3A Ro.raw | 0                  | 0        | 0                      | 397   | 405 |                                     |                                                                                                               | PEAKS DB  |
| K.GTGNLELVAVRK.E                                                  | N    | 37.48  | 1255.7249 | 12     | -1.1 | 628.8690 | 2 | 28.81 | 8        | F8:1332  | OB5952 H3A Ro.raw | 1.1804E3           | 2        | 2                      | 453   | 464 |                                     |                                                                                                               | PEAKS DB  |
| K.NPQLQLDMM(+15.99)LTC(+57.02)VEIKEGALM(+15.99)LPHFNSK.A          | N    | 36.15  | 3403.6284 | 29     | 4.5  | 851.9182 | 4 | 36.31 | 7        | F7:1742  | OB5951 H3A Ro.raw | 1.3711E5           | 1        | 1                      | 415   | 443 | Carbamidomethylation                | M10:Oxidation (M):0.00;C13:Carbamidomethylation:1000.00;M22:Oxidation (M):40.85                               | PEAKS DB  |
| R.IPSGFISYILN(+.98)RHDNQNL.R.V                                    | N    | 35.18  | 2257.1604 | 19     | 6.7  | 753.4007 | 3 | 36.32 | 11       | F11:1765 | OB5948 H3B Ro.raw | 5.0814E4           | 1        | 1                      | 260   | 278 |                                     | N11:Deamidation (NQ):11.12                                                                                    | PEAKS DB  |
| K.SFNLDDEGHALRIPSGFISYILNRHDNQ(+.98)LR.V                          | N    | 34.85  | 3496.7600 | 30     | 4.9  | 700.3627 | 5 | 37.51 | 8        | F8:1925  | OB5952 H3A Ro.raw | 2.7478E5           | 1        | 1                      | 249   | 278 |                                     | N28:Deamidation (NQ):10.11                                                                                    | PEAKS DB  |
| K.NPQLQLDLM(+15.99)MLTC(+57.02)VEIKEGALMLPHFNSK.A                 | N    | 34.78  | 3387.6335 | 29     | 4.0  | 847.9191 | 4 | 38.06 | 9        | F9:1825  | OB5953 H3A Ro.raw | 2.0615E5           | 1        | 1                      | 415   | 443 | Carbamidomethylation                | M9:Oxidation (M):0.00;C13:Carbamidomethylation:1000.00                                                        | PEAKS DB  |
| K.NPQLQLDLM(+15.99)MLTC(+57.02)VEIKEGALM(+15.99)LPHFNSK.A         | N    | 34.77  | 3403.6284 | 29     | 0.8  | 851.9150 | 4 | 37.70 | 8        | F8:1849  | OB5952 H3A Ro.raw | 1.9344E5           | 1        | 1                      | 415   | 443 | Carbamidomethylation                | M9:Oxidation (M):24.44;C13:Carbamidomethylation:1000.00;M22:Oxidation (M):19.27                               | PEAKS DB  |
| R.SSDNEGIVKVSKEHVQELTK.H                                          | N    | 34.18  | 2325.2175 | 21     | -0.9 | 776.0791 | 3 | 30.32 | 9        | F9:1416  | OB5953 H3A Ro.raw | 4.7496E3           | 1        | 1                      | 351   | 371 |                                     |                                                                                                               | PEAKS DB  |
| K.NPQLQLDLM(+15.99)M(+15.99)LTC(+57.02)VEIKEGALMLPHFNSK.A         | N    | 32.60  | 3403.6284 | 29     | 1.4  | 851.9156 | 4 | 37.49 | 9        | F9:1800  | OB5953 H3A Ro.raw | 2.8417E5           | 1        | 1                      | 415   | 443 | Carbamidomethylation                | M9:Oxidation (M):0.00;M10:Oxidation (M):0.00;C13:Carbamidomethylation:1000.00                                 | PEAKS DB  |
| R.EGEQ(+.98)EWGTPGSEVREETSR.N                                     | Y    | 32.39  | 2162.9351 | 19     | 10.0 | 721.9944 | 3 | 28.65 | 11       | F11:1321 | OB5948 H3B Ro.raw | 9.7072E2           | 1        | 1                      | 147   | 165 | Deamidation (NQ)                    | Q4:Deamidation (NQ):1000.00                                                                                   | PEAKS DB  |
| K.Q(-17.03)FQNLQNHR.I                                             | N    | 31.50  | 1166.5581 | 9      | -0.6 | 584.2859 | 2 | 28.13 | 7        | F7:1303  | OB5951 H3A Ro.raw | 4.0835E2           | 1        | 1                      | 199   | 207 | Pyro-glu from Q                     | Q1:Pyro-glu from Q:1000.00                                                                                    | PEAKS PTM |
| total 63 peptides                                                 |      |        |           |        |      |          |   |       |          |          |                   |                    |          |                        |       |     |                                     |                                                                                                               |           |



B3IXL2|B3IXL2\_ARAHY

[back to list](#)

| [Protein Coverage](#) | [Supporting Peptides](#) |

Protein Coverage:

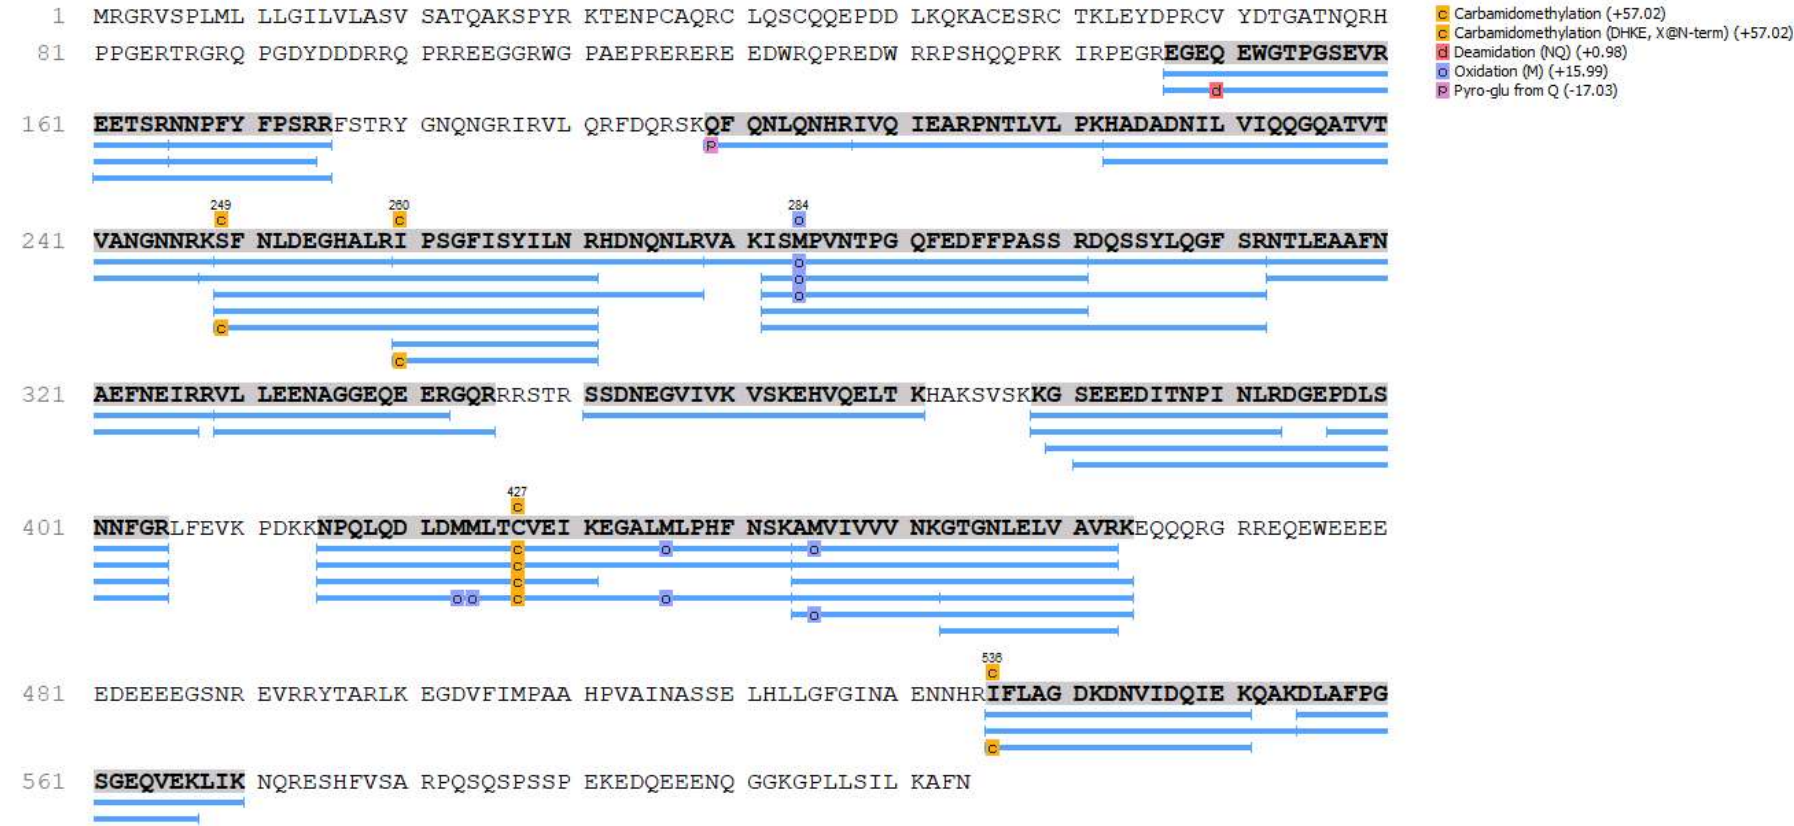

Supporting Peptides:

| Peptide                          | Uniq | -10lgP | Mass      | Length | ppm | m/z       | z | RT    | Fraction | Scan     | Source File       | Area Roast Ara h 3 | #Feature | #Feature Roast Ara h 3 | Start | End | PTM           | AScore                   | Found By |
|----------------------------------|------|--------|-----------|--------|-----|-----------|---|-------|----------|----------|-------------------|--------------------|----------|------------------------|-------|-----|---------------|--------------------------|----------|
| K.ISMPVNTPGQFEDFFPASSR,D         | N    | 200.00 | 2226.0415 | 20     | 2.0 | 1114.0303 | 2 | 35.53 | 7        | F7:1725  | OB5951 H3A Ro.raw | 8.7598E5           | 6        | 6                      | 282   | 301 |               |                          | PEAKS DB |
| R.NTLEAAFAEFNEIR,R               | N    | 165.72 | 1737.8322 | 15     | 1.8 | 869.9249  | 2 | 35.34 | 7        | F7:1714  | OB5951 H3A Ro.raw | 1.3226E6           | 6        | 6                      | 313   | 327 |               |                          | PEAKS DB |
| K.ISM(+15.99)PVNTPGQFEDFFPASSR,D | N    | 154.77 | 2242.0364 | 20     | 1.9 | 1122.0276 | 2 | 34.42 | 9        | F9:1655  | OB5953 H3A Ro.raw | 9.4493E5           | 6        | 5                      | 282   | 301 | Oxidation (M) | M3:Oxidation (M):1000.00 | PEAKS DB |
| R.IPSGFISYILNR,H                 | N    | 136.44 | 1378.7609 | 12     | 2.2 | 690.3892  | 2 | 37.11 | 9        | F9:1819  | OB5953 H3A Ro.raw | 5.8838E6           | 6        | 6                      | 260   | 271 |               |                          | PEAKS DB |
| K.SFNLDEGHALRIPSGFISYILNR,H      | N    | 130.32 | 2618.3604 | 23     | 0.7 | 873.7969  | 3 | 39.49 | 10       | F10:1795 | OB5926 H3B Ro.raw | 2.1577E7           | 15       | 15                     | 249   | 271 |               |                          | PEAKS DB |

total 63 peptides

| Peptide                             | Uniq | -10lgP | Mass      | Length | ppm  | m/z       | z | RT    | Fraction | Scan     | Source File       | Area Roast Ara h 3 | #Feature | #Feature Roast Ara h 3 | Start | End | PTM                                   | AScore                                           | Found By  |
|-------------------------------------|------|--------|-----------|--------|------|-----------|---|-------|----------|----------|-------------------|--------------------|----------|------------------------|-------|-----|---------------------------------------|--------------------------------------------------|-----------|
| R.IFLAGDKDNVIDQIEK.Q                | N    | 127.66 | 1816.9570 | 16     | -1.4 | 909.4865  | 2 | 33.07 | 11       | F11:1576 | OB5948 H3B Ro.raw | 3.3211E6           | 12       | 11                     | 536   | 551 |                                       |                                                  | PEAKS DB  |
| R.DQSSYLQGFSR.N                     | N    | 125.12 | 1286.5891 | 11     | -2.6 | 644.3015  | 2 | 30.77 | 11       | F11:1443 | OB5948 H3B Ro.raw | 3.7573E5           | 6        | 6                      | 302   | 312 |                                       |                                                  | PEAKS DB  |
| K.KGSEEEITNPINLRDGEPLSNNFGR.L       | N    | 113.18 | 3015.4170 | 27     | 1.8  | 754.8629  | 4 | 31.56 | 9        | F9:1480  | OB5953 H3A Ro.raw | 4.7042E5           | 11       | 11                     | 379   | 405 |                                       |                                                  | PEAKS DB  |
| K.SFNLDEGHALR.I                     | N    | 110.09 | 1257.6101 | 11     | -2.6 | 629.8120  | 2 | 29.12 | 11       | F11:1344 | OB5948 H3B Ro.raw | 1.3894E5           | 10       | 10                     | 249   | 259 |                                       |                                                  | PEAKS DB  |
| K.DLAFPGSGEQVEKLIK.N                | N    | 103.34 | 1729.9249 | 16     | -1.4 | 865.9703  | 2 | 33.26 | 11       | F11:1597 | OB5948 H3B Ro.raw | 3.9305E5           | 5        | 4                      | 555   | 570 |                                       |                                                  | PEAKS DB  |
| K.GSEEEITNPINLRDGEPLSNNFGR.L        | N    | 102.75 | 2887.3220 | 26     | 1.4  | 963.4493  | 3 | 32.29 | 7        | F7:1538  | OB5951 H3A Ro.raw | 4.5249E5           | 6        | 6                      | 380   | 405 |                                       |                                                  | PEAKS DB  |
| R.VLLEENAGGEQEER.G                  | N    | 102.67 | 1571.7427 | 14     | 2.2  | 786.8804  | 2 | 27.19 | 9        | F9:1251  | OB5953 H3A Ro.raw | 9.5555E3           | 3        | 3                      | 329   | 342 |                                       |                                                  | PEAKS DB  |
| R.IFLAGDKDNVIDQIEKQAK.D             | N    | 100.84 | 2144.1477 | 19     | -0.2 | 715.7245  | 3 | 33.83 | 11       | F11:1613 | OB5948 H3B Ro.raw | 1.8641E6           | 6        | 6                      | 536   | 554 |                                       |                                                  | PEAKS DB  |
| R.NTLEAAFNAEFNEIRR.V                | N    | 96.95  | 1893.9332 | 16     | 2.8  | 947.9765  | 2 | 34.01 | 7        | F7:1637  | OB5951 H3A Ro.raw | 3.4558E7           | 12       | 11                     | 313   | 328 |                                       |                                                  | PEAKS DB  |
| K.NPQLQDLDMMLTC(+57.02)VEIK.E       | N    | 94.07  | 2046.9788 | 17     | 3.3  | 1024.5000 | 2 | 36.94 | 7        | F7:1805  | OB5951 H3A Ro.raw | 0                  | 0        | 0                      | 415   | 431 | Carbamidomethylation                  | C13:Carbamidomethylation:1000.00                 | PEAKS DB  |
| R.IPSGFISYILNRHDNQNL.R.V            | N    | 93.37  | 2256.1763 | 19     | 0.1  | 565.0514  | 4 | 35.73 | 7        | F7:1716  | OB5951 H3A Ro.raw | 8.2074E6           | 11       | 11                     | 260   | 278 |                                       |                                                  | PEAKS DB  |
| R.I(+57.02)PSGFISYILNR.H            | N    | 91.10  | 1435.7823 | 12     | 0.7  | 718.8989  | 2 | 36.87 | 7        | F7:1795  | OB5951 H3A Ro.raw | 7.2345E4           | 3        | 3                      | 260   | 271 | Carbamidomethylation (DHKE, X@N-term) | I1:Carbamidomethylation (DHKE, X@N-term):1000.00 | PEAKS PTM |
| R.NNPFYFSPRR.F                      | N    | 90.91  | 1296.6364 | 10     | 0.1  | 649.3255  | 2 | 30.10 | 9        | F9:1398  | OB5953 H3A Ro.raw | 4.2765E5           | 8        | 8                      | 166   | 175 |                                       |                                                  | PEAKS DB  |
| K.GTGNLELVAVR.K                     | N    | 87.71  | 1127.6299 | 11     | 4.8  | 564.8250  | 2 | 30.09 | 9        | F9:1403  | OB5953 H3A Ro.raw | 2.2478E3           | 1        | 1                      | 453   | 463 |                                       |                                                  | PEAKS DB  |
| K.AM(+15.99)VIVVVNKGTTGNLELVAVR.K   | N    | 87.55  | 2097.1980 | 20     | 1.6  | 1049.6079 | 2 | 32.67 | 7        | F7:1560  | OB5951 H3A Ro.raw | 2.6865E5           | 3        | 3                      | 444   | 463 | Oxidation (M)                         | M2:Oxidation (M):1000.00                         | PEAKS DB  |
| K.DLAFPGSGEQVEK.L                   | N    | 85.86  | 1375.6619 | 13     | -0.7 | 688.8392  | 2 | 30.28 | 11       | F11:1414 | OB5948 H3B Ro.raw | 1.4145E5           | 4        | 4                      | 555   | 567 |                                       |                                                  | PEAKS DB  |
| K.AMVIVVVNKGTTGNLELVAVR.K           | N    | 83.81  | 2081.2031 | 20     | 1.7  | 1041.6106 | 2 | 34.96 | 7        | F7:1704  | OB5951 H3A Ro.raw | 2.013E6            | 4        | 4                      | 444   | 463 |                                       |                                                  | PEAKS DB  |
| R.NNPFYFSPR.R                       | N    | 81.75  | 1140.5352 | 9      | 0.1  | 571.2749  | 2 | 31.76 | 8        | F8:1498  | OB5952 H3A Ro.raw | 1.1774E5           | 3        | 3                      | 166   | 174 |                                       |                                                  | PEAKS DB  |
| K.SFNLDEGHALRIPSGFISYILNRHDNQNL.R.V | N    | 79.13  | 3495.7759 | 30     | 1.5  | 700.1635  | 5 | 39.97 | 9        | F9:1987  | OB5953 H3A Ro.raw | 2.0697E7           | 15       | 15                     | 249   | 278 |                                       |                                                  | PEAKS DB  |
| K.HADADNIIQGGQATVTVAN(+.98)GNNRK.S  | N    | 78.05  | 2747.3950 | 26     | 1.8  | 916.8073  | 3 | 30.31 | 8        | F8:1428  | OB5952 H3A Ro.raw | 8.0166E4           | 3        | 3                      | 223   | 248 |                                       | N21:Deamidation (NQ):14.04                       | PEAKS DB  |
| G.SEEEDITNPINLRDGEPLSNNFGR.L        | N    | 77.06  | 2830.3005 | 25     | -1.5 | 944.4417  | 3 | 33.02 | 10       | F10:1421 | OB5926 H3B Ro.raw | 1.3758E5           | 3        | 3                      | 381   | 405 |                                       |                                                  | PEAKS DB  |
| total 63 peptides                   |      |        |           |        |      |           |   |       |          |          |                   |                    |          |                        |       |     |                                       |                                                  |           |



| Peptide                                           | Uniq | -10lgP | Mass      | Length | ppm  | m/z       | z | RT    | Fraction | Scan     | Source File       | Area Roast Ara h 3 | #Feature | #Feature Roast Ara h 3 | Start | End | PTM                                   | AScore                                                   | Found By  |
|---------------------------------------------------|------|--------|-----------|--------|------|-----------|---|-------|----------|----------|-------------------|--------------------|----------|------------------------|-------|-----|---------------------------------------|----------------------------------------------------------|-----------|
| K.AMVIVVVKGTGNLELVAVRK.E                          | N    | 75.76  | 2209.2981 | 21     | -1.5 | 737.4407  | 3 | 35.66 | 10       | F10:1586 | OB5926 H3B Ro.raw | 3.5137E6           | 8        | 8                      | 444   | 464 |                                       |                                                          | PEAKS DB  |
| K.ISMPVNTPGQFEDFFPASSRDQSSYLQGFSR.N               | N    | 74.46  | 3494.6201 | 31     | 0.8  | 1165.8840 | 3 | 36.12 | 11       | F11:1762 | OB5948 H3B Ro.raw | 2.9084E6           | 5        | 5                      | 282   | 312 |                                       |                                                          | PEAKS DB  |
| R.IVQIEARPNTLVLPK.H                               | Y    | 72.30  | 1690.0140 | 15     | 1.0  | 564.3458  | 3 | 30.81 | 8        | F8:1446  | OB5952 H3A Ro.raw | 1.034E6            | 12       | 12                     | 208   | 222 |                                       |                                                          | PEAKS DB  |
| R.KSFNLDEGHALRIPSGFISYILNR.H                      | N    | 70.24  | 2746.4553 | 24     | 1.8  | 687.6223  | 4 | 39.03 | 8        | F8:1914  | OB5952 H3A Ro.raw | 3.7974E5           | 2        | 2                      | 248   | 271 |                                       |                                                          | PEAKS DB  |
| R.I(+57.02)FLAGDKDNVIDQIEK.Q                      | N    | 66.79  | 1873.9785 | 16     | -2.1 | 937.9969  | 2 | 33.39 | 10       | F10:1458 | OB5926 H3B Ro.raw | 2.2898E4           | 1        | 1                      | 536   | 551 | Carbamidomethylation (DHKE, X@N-term) | I1:Carbamidomethylation (D HKE, X@N-term):56.99          | PEAKS PTM |
| K.HADADNIIQQGQATVTVANGNNR.K                       | N    | 65.50  | 2618.3162 | 25     | 0.5  | 873.7798  | 3 | 30.34 | 7        | F7:1426  | OB5951 H3A Ro.raw | 1.8654E3           | 1        | 1                      | 223   | 247 |                                       |                                                          | PEAKS DB  |
| K.HADADNIIQQGQATVTVANGNNRK,S                      | N    | 62.55  | 2746.4111 | 26     | 0.2  | 916.4778  | 3 | 29.66 | 7        | F7:1385  | OB5951 H3A Ro.raw | 6.7701E4           | 2        | 2                      | 223   | 248 |                                       |                                                          | PEAKS DB  |
| K.ISM(+15.99)PVNTPGQFEDFFPASSRDQSSYLQGFSR.N       | N    | 62.16  | 3510.6150 | 31     | -1.8 | 1171.2126 | 3 | 35.35 | 11       | F11:1707 | OB5948 H3B Ro.raw | 2.4799E6           | 5        | 5                      | 282   | 312 | Oxidation (M)                         | M3:Oxidation (M):1000.00                                 | PEAKS DB  |
| R.EETSRNPNFYFPSRR.F                               | N    | 62.14  | 1898.9023 | 15     | -0.7 | 633.9758  | 3 | 30.73 | 10       | F10:1288 | OB5926 H3B Ro.raw | 1.7594E4           | 1        | 1                      | 161   | 175 |                                       |                                                          | PEAKS DB  |
| K.NPQLQDLDMMLTC(+57.02)VEIKEGALMLPHFNSK.A         | N    | 59.27  | 3371.6387 | 29     | -0.3 | 843.9188  | 4 | 39.49 | 10       | F10:1807 | OB5926 H3B Ro.raw | 8.6484E5           | 3        | 3                      | 415   | 443 | Carbamidomethylation                  | C13:Carbamidomethylation:1000.00                         | PEAKS DB  |
| K.KGSEEDITNPINLR.D                                | N    | 58.67  | 1713.8533 | 15     | 2.3  | 572.2930  | 3 | 29.61 | 9        | F9:1375  | OB5953 H3A Ro.raw | 1.9283E3           | 1        | 1                      | 379   | 393 |                                       |                                                          | PEAKS DB  |
| K.NPQLQDLDMMLTC(+57.02)VEIKEGALM(+15.99)LPHFNSK.A | N    | 58.64  | 3387.6335 | 29     | 1.2  | 847.9185  | 4 | 38.07 | 11       | F11:1874 | OB5948 H3B Ro.raw | 3.9631E5           | 2        | 2                      | 415   | 443 | Carbamidomethylation; Oxidation (M)   | C13:Carbamidomethylation:1000.00;M22:Oxidation (M):51.99 | PEAKS DB  |
| K.NPQLQDLDM(+15.99)MLTC(+57.02)VEIK.E             | N    | 57.29  | 2062.9736 | 17     | 2.8  | 1032.4969 | 2 | 36.63 | 9        | F9:1780  | OB5953 H3A Ro.raw | 0                  | 0        | 0                      | 415   | 431 | Carbamidomethylation                  | M9:Oxidation (M):24.44;C13:Carbamidomethylation:1000.00  | PEAKS DB  |
| R.NTLEAAFN(+.98)AEFNEIRR.V                        | N    | 56.23  | 1894.9172 | 16     | 0.4  | 948.4663  | 2 | 32.13 | 9        | F9:1524  | OB5953 H3A Ro.raw | 1.3345E4           | 2        | 2                      | 313   | 328 |                                       | N8:Deamidation (NQ):20.76                                | PEAKS DB  |
| R.VLLEENAGGEQEERQGR.R                             | N    | 52.47  | 1912.9238 | 17     | -2.1 | 638.6472  | 3 | 28.03 | 8        | F8:1297  | OB5952 H3A Ro.raw | 8.2166E3           | 2        | 2                      | 329   | 345 |                                       |                                                          | PEAKS DB  |
| R.NTLEAAFNAEFN(+.98)EIRR.V                        | N    | 50.81  | 1894.9172 | 16     | 1.9  | 948.4677  | 2 | 32.67 | 7        | F7:1563  | OB5951 H3A Ro.raw | 9.2576E4           | 2        | 2                      | 313   | 328 |                                       | N12:Deamidation (NQ):8.26                                | PEAKS DB  |
| K.HADADNIIQQGQATVTVANGN(+.98)NRK,S                | N    | 50.48  | 2747.3950 | 26     | -4.1 | 916.8038  | 3 | 30.36 | 11       | F11:1426 | OB5948 H3B Ro.raw | 0                  | 0        | 0                      | 223   | 248 |                                       | N23:Deamidation (NQ):9.40                                | PEAKS DB  |
| K.S(+57.02)FNLDEGHALRIPSGFISYILNR.H               | N    | 49.55  | 2675.3818 | 23     | 2.3  | 892.8033  | 3 | 39.35 | 7        | F7:1901  | OB5951 H3A Ro.raw | 6.7035E5           | 1        | 1                      | 249   | 271 | Carbamidomethylation (DHKE, X@N-term) | S1:Carbamidomethylation (D HKE, X@N-term):63.97          | PEAKS PTM |
| R.IFLAGD(+57.02)KDNVIDQIEK.Q                      | N    | 45.63  | 1873.9785 | 16     | 1.4  | 937.9978  | 2 | 33.53 | 12       | F12:1622 | OB5949 H3B Ro.raw | 3.5356E3           | 1        | 1                      | 536   | 551 |                                       | D6:Carbamidomethylation (D HKE, X@N-term):15.57          | PEAKS PTM |

total 63 peptides

| Peptide                                                           | Uniq | -10lgP | Mass      | Length | ppm  | m/z      | z | RT    | Fraction | Scan     | Source File       | Area Roast Ara h 3 | #Feature | #Feature Roast Ara h 3 | Start | End | PTM                                 | AScore                                                                                                        | Found By |
|-------------------------------------------------------------------|------|--------|-----------|--------|------|----------|---|-------|----------|----------|-------------------|--------------------|----------|------------------------|-------|-----|-------------------------------------|---------------------------------------------------------------------------------------------------------------|----------|
| K.HADADNILVIQQGQ(+.98)ATVTVANGNNRK.S                              | N    | 45.21  | 2747.3950 | 26     | 2.6  | 916.8103 | 3 | 30.46 | 10       | F10:1280 | OB5926 H3B Ro.raw | 0                  | 0        | 0                      | 223   | 248 |                                     | Q14:Deamidation (NQ):0.00                                                                                     | PEAKS DB |
| K.AM(+15.99)VIVVVNKGTGNLELVAVRK.E                                 | N    | 45.01  | 2225.2930 | 21     | -1.5 | 742.7723 | 3 | 33.77 | 10       | F10:1559 | OB5926 H3B Ro.raw | 4.0307E5           | 2        | 2                      | 444   | 464 | Oxidation (M)                       | M2:Oxidation (M):1000.00                                                                                      | PEAKS DB |
| R.VAKISM(+15.99)PVNTPGQFEDFFPASSR.D                               | N    | 44.60  | 2540.2368 | 23     | 3.4  | 847.7558 | 3 | 33.41 | 8        | F8:1598  | OB5952 H3A Ro.raw | 0                  | 0        | 0                      | 279   | 301 | Oxidation (M)                       | M6:Oxidation (M):1000.00                                                                                      | PEAKS DB |
| K.AMVIVVVNK.G                                                     | N    | 42.66  | 971.5837  | 9      | -3.0 | 486.7977 | 2 | 29.40 | 7        | F7:1370  | OB5951 H3A Ro.raw | 0                  | 0        | 0                      | 444   | 452 |                                     |                                                                                                               | PEAKS DB |
| R.N(+.98)TLEAAFNAEFNEIRR.V                                        | N    | 42.24  | 1894.9172 | 16     | 3.2  | 948.4689 | 2 | 33.46 | 8        | F8:1601  | OB5952 H3A Ro.raw | 5.9553E4           | 1        | 1                      | 313   | 328 |                                     | N1:Deamidation (NQ):34.75                                                                                     | PEAKS DB |
| K.NPQLQLDLM(+15.99)M(+15.99)LTC(+57.02)VEIKEGALM(+15.99)LPHFNSK.A | N    | 39.18  | 3419.6233 | 29     | 1.7  | 855.9146 | 4 | 35.97 | 8        | F8:1751  | OB5952 H3A Ro.raw | 6.0894E4           | 1        | 1                      | 415   | 443 | Oxidation (M); Carbamidomethylation | M9:Oxidation (M):1000.00;M10:Oxidation (M):1000.00;C13:Carbamidomethylation:1000.00;M22:Oxidation (M):1000.00 | PEAKS DB |
| R.EGEQEWGTPGSEVREETS.R,N                                          | Y    | 38.57  | 2161.9512 | 19     | -7.0 | 721.6542 | 3 | 28.61 | 11       | F11:1321 | OB5948 H3B Ro.raw | 0                  | 0        | 0                      | 147   | 165 |                                     |                                                                                                               | PEAKS DB |
| E.PDLSNNFGR.L                                                     | N    | 38.29  | 1018.4832 | 9      | 1.2  | 510.2495 | 2 | 31.26 | 7        | F7:1478  | OB5951 H3A Ro.raw | 0                  | 0        | 0                      | 397   | 405 |                                     |                                                                                                               | PEAKS DB |
| K.GTGNLELVAVRK.E                                                  | N    | 37.48  | 1255.7249 | 12     | -1.1 | 628.8690 | 2 | 28.81 | 8        | F8:1332  | OB5952 H3A Ro.raw | 1.1804E3           | 2        | 2                      | 453   | 464 |                                     |                                                                                                               | PEAKS DB |
| K.NPQLQLDMM(+15.99)LTC(+57.02)VEIKEGALM(+15.99)LPHFNSK.A          | N    | 36.15  | 3403.6284 | 29     | 4.5  | 851.9182 | 4 | 36.31 | 7        | F7:1742  | OB5951 H3A Ro.raw | 1.3711E5           | 1        | 1                      | 415   | 443 | Carbamidomethylation                | M10:Oxidation (M):0.00;C13:Carbamidomethylation:1000.00;M22:Oxidation (M):40.85                               | PEAKS DB |
| R.IPSGFISYILN(+.98)RHDNQNL.R.V                                    | N    | 35.18  | 2257.1604 | 19     | 6.7  | 753.4007 | 3 | 36.32 | 11       | F11:1765 | OB5948 H3B Ro.raw | 5.0814E4           | 1        | 1                      | 260   | 278 |                                     | N11:Deamidation (NQ):11.12                                                                                    | PEAKS DB |
| K.SFNLDGEGHALRIPSGFISYILNRHDNQ(+.98)LR.V                          | N    | 34.85  | 3496.7600 | 30     | 4.9  | 700.3627 | 5 | 37.51 | 8        | F8:1925  | OB5952 H3A Ro.raw | 2.7478E5           | 1        | 1                      | 249   | 278 |                                     | N28:Deamidation (NQ):10.11                                                                                    | PEAKS DB |
| K.NPQLQLDLM(+15.99)MLTC(+57.02)VEIKEGALMLPHFNSK.A                 | N    | 34.78  | 3387.6335 | 29     | 4.0  | 847.9191 | 4 | 38.06 | 9        | F9:1825  | OB5953 H3A Ro.raw | 2.0615E5           | 1        | 1                      | 415   | 443 | Carbamidomethylation                | M9:Oxidation (M):0.00;C13:Carbamidomethylation:1000.00                                                        | PEAKS DB |
| K.NPQLQLDLM(+15.99)MLTC(+57.02)VEIKEGALM(+15.99)LPHFNSK.A         | N    | 34.77  | 3403.6284 | 29     | 0.8  | 851.9150 | 4 | 37.70 | 8        | F8:1849  | OB5952 H3A Ro.raw | 1.9344E5           | 1        | 1                      | 415   | 443 | Carbamidomethylation                | M9:Oxidation (M):24.44;C13:Carbamidomethylation:1000.00;M22:Oxidation (M):19.27                               | PEAKS DB |
| R.SSDNEGIVKVSKEHVQELTK.H                                          | N    | 34.18  | 2325.2175 | 21     | -0.9 | 776.0791 | 3 | 30.32 | 9        | F9:1416  | OB5953 H3A Ro.raw | 4.7496E3           | 1        | 1                      | 351   | 371 |                                     |                                                                                                               | PEAKS DB |
| K.NPQLQLDLM(+15.99)M(+15.99)LTC(+57.02)VEIKEGALMLPHFNSK.A         | N    | 32.60  | 3403.6284 | 29     | 1.4  | 851.9156 | 4 | 37.49 | 9        | F9:1800  | OB5953 H3A Ro.raw | 2.8417E5           | 1        | 1                      | 415   | 443 | Carbamidomethylation                | M9:Oxidation (M):0.00;M10:Oxidation (M):0.00;C13:Carbamidomethylation:1000.00                                 | PEAKS DB |

total 63 peptides

| Peptide                        | Uniq | -10lgP | Mass      | Length | ppm  | m/z      | z | RT    | Fraction | Scan     | Source File       | Area Roast Ara h 3 | #Feature | #Feature Roast Ara h 3 | Start | End | PTM              | AScore                      | Found By  |
|--------------------------------|------|--------|-----------|--------|------|----------|---|-------|----------|----------|-------------------|--------------------|----------|------------------------|-------|-----|------------------|-----------------------------|-----------|
| R.EGEQ(+.98)EWGTPGSEVREETS.R.N | Y    | 32.39  | 2162.9351 | 19     | 10.0 | 721.9944 | 3 | 28.65 | 11       | F11:1321 | OB5948 H3B Ro.raw | 9.7072E2           | 1        | 1                      | 147   | 165 | Deamidation (NQ) | Q4:Deamidation (NQ):1000.00 | PEAKS DB  |
| K.Q(-17.03)FQNLQNHR.I          | N    | 31.50  | 1166.5581 | 9      | -0.6 | 584.2859 | 2 | 28.13 | 7        | F7:1303  | OB5951 H3A Ro.raw | 4.0835E2           | 1        | 1                      | 199   | 207 | Pyro-glu from Q  | Q1:Pyro-glu from Q:1000.00  | PEAKS PTM |
| total 63 peptides              |      |        |           |        |      |          |   |       |          |          |                   |                    |          |                        |       |     |                  |                             |           |

Q6PSU3|Q6PSU3\_ARAHY

back to list

| Protein Coverage | Supporting Peptides |

Protein Coverage:

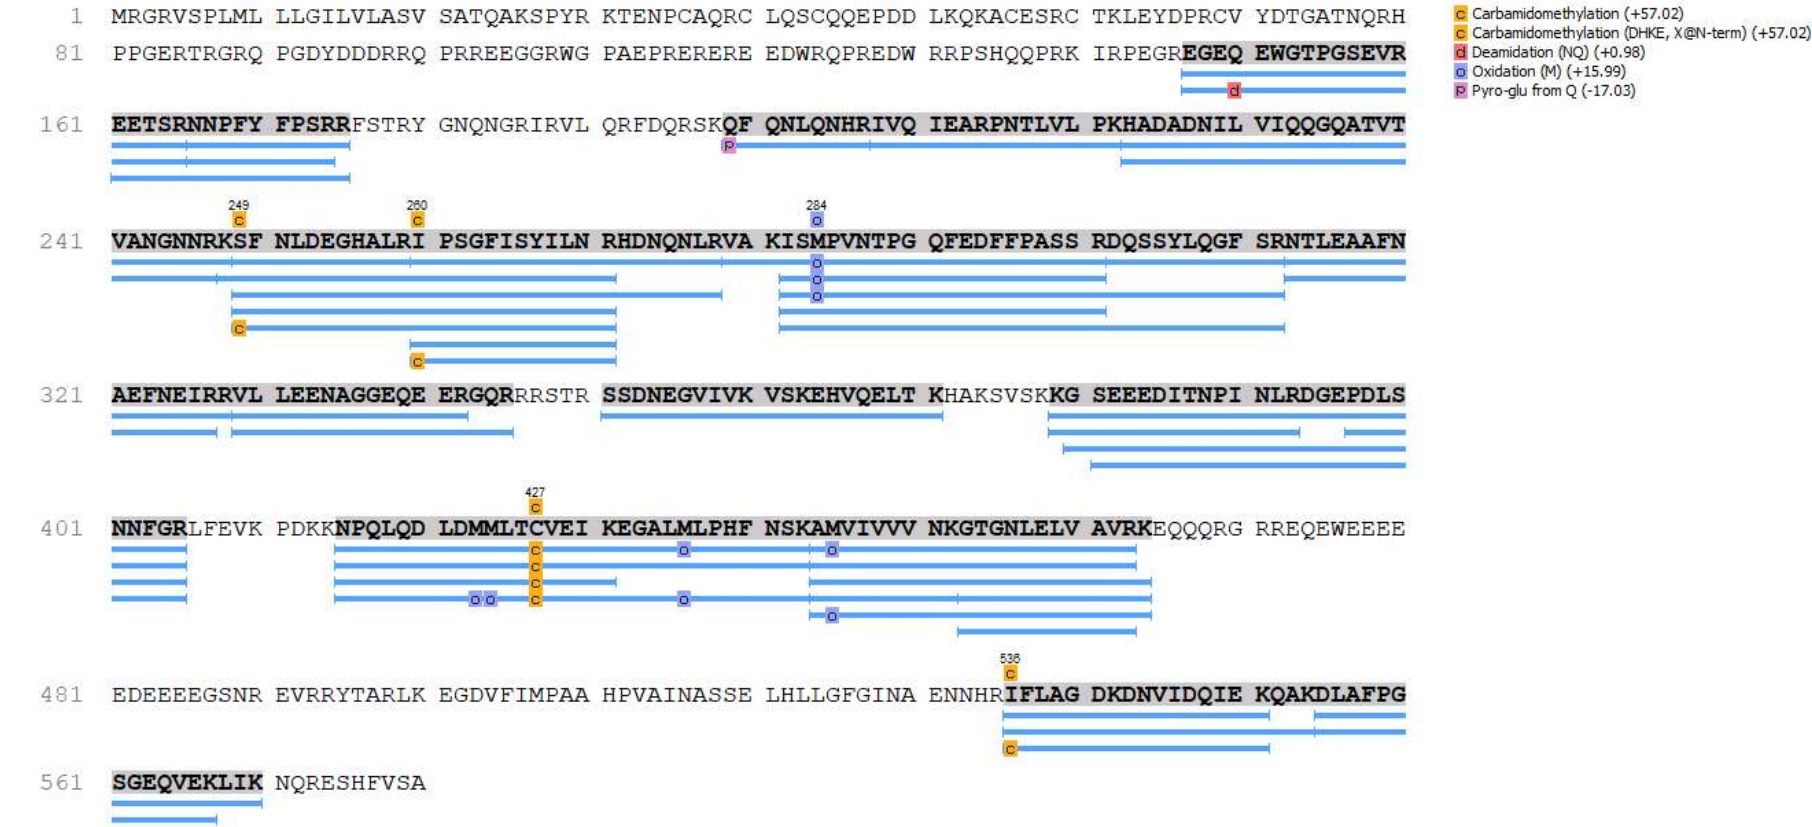

Supporting Peptides:

| Peptide                  | Uniq | -10lgP | Mass      | Length | ppm | m/z       | z | RT    | Fraction | Scan    | Source File       | Area Roast Ara h 3 | #Feature | #Feature Roast Ara h 3 | Start | End | PTM | AScore | Found By |
|--------------------------|------|--------|-----------|--------|-----|-----------|---|-------|----------|---------|-------------------|--------------------|----------|------------------------|-------|-----|-----|--------|----------|
| K.ISMPVNTPGQFEDFFPASSR.D | N    | 200.00 | 2226.0415 | 20     | 2.0 | 1114.0303 | 2 | 35.53 | 7        | F7:1725 | OB5951 H3A Ro.raw | 8.7598E5           | 6        | 6                      | 282   | 301 |     |        | PEAKS DB |

total 63 peptides

| Peptide                           | Uniq | -10lgP | Mass      | Length | ppm  | m/z       | z | RT    | Fraction | Scan     | Source File       | Area Roast Ara h 3 | #Feature | #Feature Roast Ara h 3 | Start | End | PTM                                   | AScore                                           | Found By  |
|-----------------------------------|------|--------|-----------|--------|------|-----------|---|-------|----------|----------|-------------------|--------------------|----------|------------------------|-------|-----|---------------------------------------|--------------------------------------------------|-----------|
| R.NTLEAAFNAEFNEIR.R               | N    | 165.72 | 1737.8322 | 15     | 1.8  | 869.9249  | 2 | 35.34 | 7        | F7:1714  | OB5951 H3A Ro.raw | 1.3226E6           | 6        | 6                      | 313   | 327 |                                       |                                                  | PEAKS DB  |
| K.ISM(+15.99)PVNTPGQFEDFFPASSR.D  | N    | 154.77 | 2242.0364 | 20     | 1.9  | 1122.0276 | 2 | 34.42 | 9        | F9:1655  | OB5953 H3A Ro.raw | 9.4493E5           | 6        | 5                      | 282   | 301 | Oxidation (M)                         | M3:Oxidation (M):1000.00                         | PEAKS DB  |
| R.IPSGFISYILNR.H                  | N    | 136.44 | 1378.7609 | 12     | 2.2  | 690.3892  | 2 | 37.11 | 9        | F9:1819  | OB5953 H3A Ro.raw | 5.8838E6           | 6        | 6                      | 260   | 271 |                                       |                                                  | PEAKS DB  |
| K.SFNLDEGHALRIPSGFISYILNR.H       | N    | 130.32 | 2618.3604 | 23     | 0.7  | 873.7969  | 3 | 39.49 | 10       | F10:1795 | OB5926 H3B Ro.raw | 2.1577E7           | 15       | 15                     | 249   | 271 |                                       |                                                  | PEAKS DB  |
| R.IFLAGDKDNVIDQIEK.Q              | N    | 127.66 | 1816.9570 | 16     | -1.4 | 909.4865  | 2 | 33.07 | 11       | F11:1576 | OB5948 H3B Ro.raw | 3.3211E6           | 12       | 11                     | 536   | 551 |                                       |                                                  | PEAKS DB  |
| R.DQSSYLQGFSR.N                   | N    | 125.12 | 1286.5891 | 11     | -2.6 | 644.3015  | 2 | 30.77 | 11       | F11:1443 | OB5948 H3B Ro.raw | 3.7573E5           | 6        | 6                      | 302   | 312 |                                       |                                                  | PEAKS DB  |
| K.KGSEEDITNPINLRDGEPLSNNFGR.L     | N    | 113.18 | 3015.4170 | 27     | 1.8  | 754.8629  | 4 | 31.56 | 9        | F9:1480  | OB5953 H3A Ro.raw | 4.7042E5           | 11       | 11                     | 379   | 405 |                                       |                                                  | PEAKS DB  |
| K.SFNLDEGHALR.I                   | N    | 110.09 | 1257.6101 | 11     | -2.6 | 629.8120  | 2 | 29.12 | 11       | F11:1344 | OB5948 H3B Ro.raw | 1.3894E5           | 10       | 10                     | 249   | 259 |                                       |                                                  | PEAKS DB  |
| K.DLAFIGSGEQVEKLIK.N              | N    | 103.34 | 1729.9249 | 16     | -1.4 | 865.9703  | 2 | 33.26 | 11       | F11:1597 | OB5948 H3B Ro.raw | 3.9305E5           | 5        | 4                      | 555   | 570 |                                       |                                                  | PEAKS DB  |
| K.GSEEDITNPINLRDGEPLSNNFGR.L      | N    | 102.75 | 2887.3220 | 26     | 1.4  | 963.4493  | 3 | 32.29 | 7        | F7:1538  | OB5951 H3A Ro.raw | 4.5249E5           | 6        | 6                      | 380   | 405 |                                       |                                                  | PEAKS DB  |
| R.VLLEENAGGEQEER.G                | N    | 102.67 | 1571.7427 | 14     | 2.2  | 786.8804  | 2 | 27.19 | 9        | F9:1251  | OB5953 H3A Ro.raw | 9.5555E3           | 3        | 3                      | 329   | 342 |                                       |                                                  | PEAKS DB  |
| R.IFLAGDKDNVIDQIEKQAK.D           | N    | 100.84 | 2144.1477 | 19     | -0.2 | 715.7245  | 3 | 33.83 | 11       | F11:1613 | OB5948 H3B Ro.raw | 1.8641E6           | 6        | 6                      | 536   | 554 |                                       |                                                  | PEAKS DB  |
| R.NTLEAAFNAEFNEIRR.V              | N    | 96.95  | 1893.9332 | 16     | 2.8  | 947.9765  | 2 | 34.01 | 7        | F7:1637  | OB5951 H3A Ro.raw | 3.4558E7           | 12       | 11                     | 313   | 328 |                                       |                                                  | PEAKS DB  |
| K.NPQLQDLDMMLTC(+57.02)VEIK.E     | N    | 94.07  | 2046.9788 | 17     | 3.3  | 1024.5000 | 2 | 36.94 | 7        | F7:1805  | OB5951 H3A Ro.raw | 0                  | 0        | 0                      | 415   | 431 | Carbamidomethylation                  | C13:Carbamidomethylation:1000.00                 | PEAKS DB  |
| R.IPSGFISYILNRHDNQNLR.V           | N    | 93.37  | 2256.1763 | 19     | 0.1  | 565.0514  | 4 | 35.73 | 7        | F7:1716  | OB5951 H3A Ro.raw | 8.2074E6           | 11       | 11                     | 260   | 278 |                                       |                                                  | PEAKS DB  |
| R.I(+57.02)PSGFISYILNR.H          | N    | 91.10  | 1435.7823 | 12     | 0.7  | 718.8989  | 2 | 36.87 | 7        | F7:1795  | OB5951 H3A Ro.raw | 7.2345E4           | 3        | 3                      | 260   | 271 | Carbamidomethylation (DHKE, X@N-term) | I1:Carbamidomethylation (DHKE, X@N-term):1000.00 | PEAKS PTM |
| R.NNPFYFPSRR.F                    | N    | 90.91  | 1296.6364 | 10     | 0.1  | 649.3255  | 2 | 30.10 | 9        | F9:1398  | OB5953 H3A Ro.raw | 4.2765E5           | 8        | 8                      | 166   | 175 |                                       |                                                  | PEAKS DB  |
| K.GTGNLELVAVR.K                   | N    | 87.71  | 1127.6299 | 11     | 4.8  | 564.8250  | 2 | 30.09 | 9        | F9:1403  | OB5953 H3A Ro.raw | 2.2478E3           | 1        | 1                      | 453   | 463 |                                       |                                                  | PEAKS DB  |
| K.AM(+15.99)VIVVVNKGTTGNLELVAVR.K | N    | 87.55  | 2097.1980 | 20     | 1.6  | 1049.6079 | 2 | 32.67 | 7        | F7:1560  | OB5951 H3A Ro.raw | 2.6865E5           | 3        | 3                      | 444   | 463 | Oxidation (M)                         | M2:Oxidation (M):1000.00                         | PEAKS DB  |
| K.DLAFIGSGEQVEK.L                 | N    | 85.86  | 1375.6619 | 13     | -0.7 | 688.8392  | 2 | 30.28 | 11       | F11:1414 | OB5948 H3B Ro.raw | 1.4145E5           | 4        | 4                      | 555   | 567 |                                       |                                                  | PEAKS DB  |
| K.AMVIVVVNKGTTGNLELVAVR.K         | N    | 83.81  | 2081.2031 | 20     | 1.7  | 1041.6106 | 2 | 34.96 | 7        | F7:1704  | OB5951 H3A Ro.raw | 2.013E6            | 4        | 4                      | 444   | 463 |                                       |                                                  | PEAKS DB  |
| total 63 peptides                 |      |        |           |        |      |           |   |       |          |          |                   |                    |          |                        |       |     |                                       |                                                  |           |

| Peptide                                           | Uniq | -10lgP | Mass      | Length | ppm  | m/z       | z | RT    | Fraction | Scan     | Source File       | Area Roast Ara h 3 | #Feature | #Feature Roast Ara h 3 | Start | End | PTM                                         | AScore                                                   | Found By  |
|---------------------------------------------------|------|--------|-----------|--------|------|-----------|---|-------|----------|----------|-------------------|--------------------|----------|------------------------|-------|-----|---------------------------------------------|----------------------------------------------------------|-----------|
| R.NNPFYFPSR,R                                     | N    | 81.75  | 1140.5352 | 9      | 0.1  | 571.2749  | 2 | 31.76 | 8        | F8:1498  | OB5952 H3A Ro.raw | 1.1774E5           | 3        | 3                      | 166   | 174 |                                             |                                                          | PEAKS DB  |
| K.SFNLDEGHALRIPSGFISYILNRHDNQNL.R.V               | N    | 79.13  | 3495.7759 | 30     | 1.5  | 700.1635  | 5 | 39.97 | 9        | F9:1987  | OB5953 H3A Ro.raw | 2.0697E7           | 15       | 15                     | 249   | 278 |                                             |                                                          | PEAKS DB  |
| K.HADADNIIQQGQATVTVAN(+.98)GNNRK.S                | N    | 78.05  | 2747.3950 | 26     | 1.8  | 916.8073  | 3 | 30.31 | 8        | F8:1428  | OB5952 H3A Ro.raw | 8.0166E4           | 3        | 3                      | 223   | 248 |                                             | N21:Deamidation (NQ):14.04                               | PEAKS DB  |
| G.SEEEDITNPINLRDGEPLDLSNNFGR.L                    | N    | 77.06  | 2830.3005 | 25     | -1.5 | 944.4417  | 3 | 33.02 | 10       | F10:1421 | OB5926 H3B Ro.raw | 1.3758E5           | 3        | 3                      | 381   | 405 |                                             |                                                          | PEAKS DB  |
| K.AMVIVVVKGTGNLELVAVRK.E                          | N    | 75.76  | 2209.2981 | 21     | -1.5 | 737.4407  | 3 | 35.66 | 10       | F10:1586 | OB5926 H3B Ro.raw | 3.5137E6           | 8        | 8                      | 444   | 464 |                                             |                                                          | PEAKS DB  |
| K.ISMPVNTPGQFEDFFPASSRDQSSYLQGFSR.N               | N    | 74.46  | 3494.6201 | 31     | 0.8  | 1165.8840 | 3 | 36.12 | 11       | F11:1762 | OB5948 H3B Ro.raw | 2.9084E6           | 5        | 5                      | 282   | 312 |                                             |                                                          | PEAKS DB  |
| R.IVQIEARPNTLVLPK.H                               | Y    | 72.30  | 1690.0140 | 15     | 1.0  | 564.3458  | 3 | 30.81 | 8        | F8:1446  | OB5952 H3A Ro.raw | 1.034E6            | 12       | 12                     | 208   | 222 |                                             |                                                          | PEAKS DB  |
| R.KSFNLDEGHALRIPSGFISYILNR.H                      | N    | 70.24  | 2746.4553 | 24     | 1.8  | 687.6223  | 4 | 39.03 | 8        | F8:1914  | OB5952 H3A Ro.raw | 3.7974E5           | 2        | 2                      | 248   | 271 |                                             |                                                          | PEAKS DB  |
| R.I(+57.02)FLAGDKDNVIDQIEK.Q                      | N    | 66.79  | 1873.9785 | 16     | -2.1 | 937.9969  | 2 | 33.39 | 10       | F10:1458 | OB5926 H3B Ro.raw | 2.2898E4           | 1        | 1                      | 536   | 551 | Carbamidomethylation (DHKE, X@N-term):56.99 | I1:Carbamidomethylation (DHKE, X@N-term):56.99           | PEAKS PTM |
| K.HADADNIIQQGQATVTVANGNNR.K                       | N    | 65.50  | 2618.3162 | 25     | 0.5  | 873.7798  | 3 | 30.34 | 7        | F7:1426  | OB5951 H3A Ro.raw | 1.8654E3           | 1        | 1                      | 223   | 247 |                                             |                                                          | PEAKS DB  |
| K.HADADNIIQQGQATVTVANGNNRK.S                      | N    | 62.55  | 2746.4111 | 26     | 0.2  | 916.4778  | 3 | 29.66 | 7        | F7:1385  | OB5951 H3A Ro.raw | 6.7701E4           | 2        | 2                      | 223   | 248 |                                             |                                                          | PEAKS DB  |
| K.ISM(+15.99)PVNTPGQFEDFFPASSRDQSSYLQGFSR.N       | N    | 62.16  | 3510.6150 | 31     | -1.8 | 1171.2126 | 3 | 35.35 | 11       | F11:1707 | OB5948 H3B Ro.raw | 2.4799E6           | 5        | 5                      | 282   | 312 | Oxidation (M)                               | M3:Oxidation (M):1000.00                                 | PEAKS DB  |
| R.EETSRNPFYFPSRR.F                                | N    | 62.14  | 1898.9023 | 15     | -0.7 | 633.9758  | 3 | 30.73 | 10       | F10:1288 | OB5926 H3B Ro.raw | 1.7594E4           | 1        | 1                      | 161   | 175 |                                             |                                                          | PEAKS DB  |
| K.NPQLQDLDMMLTC(+57.02)VEIKEGALMLPHFNSK.A         | N    | 59.27  | 3371.6387 | 29     | -0.3 | 843.9188  | 4 | 39.49 | 10       | F10:1807 | OB5926 H3B Ro.raw | 8.6484E5           | 3        | 3                      | 415   | 443 | Carbamidomethylation                        | C13:Carbamidomethylation:1000.00                         | PEAKS DB  |
| K.KGSEEDITNPINLR.D                                | N    | 58.67  | 1713.8533 | 15     | 2.3  | 572.2930  | 3 | 29.61 | 9        | F9:1375  | OB5953 H3A Ro.raw | 1.9283E3           | 1        | 1                      | 379   | 393 |                                             |                                                          | PEAKS DB  |
| K.NPQLQDLDMMLTC(+57.02)VEIKEGALM(+15.99)LPHFNSK.A | N    | 58.64  | 3387.6335 | 29     | 1.2  | 847.9185  | 4 | 38.07 | 11       | F11:1874 | OB5948 H3B Ro.raw | 3.9631E5           | 2        | 2                      | 415   | 443 | Carbamidomethylation; Oxidation (M)         | C13:Carbamidomethylation:1000.00;M22:Oxidation (M):51.99 | PEAKS DB  |
| K.NPQLQDLDM(+15.99)MLTC(+57.02)VEIK.E             | N    | 57.29  | 2062.9736 | 17     | 2.8  | 1032.4969 | 2 | 36.63 | 9        | F9:1780  | OB5953 H3A Ro.raw | 0                  | 0        | 0                      | 415   | 431 | Carbamidomethylation                        | M9:Oxidation (M):24.44;C13:Carbamidomethylation:1000.00  | PEAKS DB  |
| R.NTLEAAFN(+.98)AEFNEIRR.V                        | N    | 56.23  | 1894.9172 | 16     | 0.4  | 948.4663  | 2 | 32.13 | 9        | F9:1524  | OB5953 H3A Ro.raw | 1.3345E4           | 2        | 2                      | 313   | 328 |                                             | N8:Deamidation (NQ):20.76                                | PEAKS DB  |
| R.VLLEENAGGEQEERQGR.R                             | N    | 52.47  | 1912.9238 | 17     | -2.1 | 638.6472  | 3 | 28.03 | 8        | F8:1297  | OB5952 H3A Ro.raw | 8.2166E3           | 2        | 2                      | 329   | 345 |                                             |                                                          | PEAKS DB  |

total 63 peptides

| Peptide                                                           | Uniq | -10lgP | Mass      | Length | ppm  | m/z      | z | RT    | Fraction | Scan     | Source File       | Area Roast Ara h 3 | #Feature | #Feature Roast Ara h 3 | Start | End | PTM                                   | AScore                                                                                                        | Found By  |
|-------------------------------------------------------------------|------|--------|-----------|--------|------|----------|---|-------|----------|----------|-------------------|--------------------|----------|------------------------|-------|-----|---------------------------------------|---------------------------------------------------------------------------------------------------------------|-----------|
| R.NTLEAAFNAEFN(+.98)EIRR.V                                        | N    | 50.81  | 1894.9172 | 16     | 1.9  | 948.4677 | 2 | 32.67 | 7        | F7:1563  | OB5951 H3A Ro.raw | 9.2576E4           | 2        | 2                      | 313   | 328 |                                       | N12:Deamidation (NQ):8.26                                                                                     | PEAKS DB  |
| K.HADADNILVIQQGQATVTVANGN(+.98)NRK.S                              | N    | 50.48  | 2747.3950 | 26     | -4.1 | 916.8038 | 3 | 30.36 | 11       | F11:1426 | OB5948 H3B Ro.raw | 0                  | 0        | 0                      | 223   | 248 |                                       | N23:Deamidation (NQ):9.40                                                                                     | PEAKS DB  |
| K.S(+57.02)FNLDEGHALRIPSGFISYILNR.H                               | N    | 49.55  | 2675.3818 | 23     | 2.3  | 892.8033 | 3 | 39.35 | 7        | F7:1901  | OB5951 H3A Ro.raw | 6.7035E5           | 1        | 1                      | 249   | 271 | Carbamidomethylation (DHKE, X@N-term) | S1:Carbamidomethylation (D HKE, X@N-term):63.97                                                               | PEAKS PTM |
| R.IFLAGD(+57.02)KDNVIDQIEK.Q                                      | N    | 45.63  | 1873.9785 | 16     | 1.4  | 937.9978 | 2 | 33.53 | 12       | F12:1622 | OB5949 H3B Ro.raw | 3.5356E3           | 1        | 1                      | 536   | 551 |                                       | D6:Carbamidomethylation (D HKE, X@N-term):15.57                                                               | PEAKS PTM |
| K.HADADNILVIQQGQ(+.98)ATVTVANGNNRK.S                              | N    | 45.21  | 2747.3950 | 26     | 2.6  | 916.8103 | 3 | 30.46 | 10       | F10:1280 | OB5926 H3B Ro.raw | 0                  | 0        | 0                      | 223   | 248 |                                       | Q14:Deamidation (NQ):0.00                                                                                     | PEAKS DB  |
| K.AM(+15.99)VIVVVNKG TGNLELVAVRK.E                                | N    | 45.01  | 2225.2930 | 21     | -1.5 | 742.7723 | 3 | 33.77 | 10       | F10:1559 | OB5926 H3B Ro.raw | 4.0307E5           | 2        | 2                      | 444   | 464 | Oxidation (M)                         | M2:Oxidation (M):1000.00                                                                                      | PEAKS DB  |
| R.VAKISM(+15.99)PVNTPGQFEDFFPASSR.D                               | N    | 44.60  | 2540.2368 | 23     | 3.4  | 847.7558 | 3 | 33.41 | 8        | F8:1598  | OB5952 H3A Ro.raw | 0                  | 0        | 0                      | 279   | 301 | Oxidation (M)                         | M6:Oxidation (M):1000.00                                                                                      | PEAKS DB  |
| K.AMVIVVVK.G                                                      | N    | 42.66  | 971.5837  | 9      | -3.0 | 486.7977 | 2 | 29.40 | 7        | F7:1370  | OB5951 H3A Ro.raw | 0                  | 0        | 0                      | 444   | 452 |                                       |                                                                                                               | PEAKS DB  |
| R.N(+.98)TLEAAFNAEFNEIRR.V                                        | N    | 42.24  | 1894.9172 | 16     | 3.2  | 948.4689 | 2 | 33.46 | 8        | F8:1601  | OB5952 H3A Ro.raw | 5.9553E4           | 1        | 1                      | 313   | 328 |                                       | N1:Deamidation (NQ):34.75                                                                                     | PEAKS DB  |
| K.NPQLQDLDM(+15.99)M(+15.99)LTC(+57.02)VEIKEGALM(+15.99)LPHFNSK.A | N    | 39.18  | 3419.6233 | 29     | 1.7  | 855.9146 | 4 | 35.97 | 8        | F8:1751  | OB5952 H3A Ro.raw | 6.0894E4           | 1        | 1                      | 415   | 443 | Oxidation (M); Carbamidomethylation   | M9:Oxidation (M):1000.00;M10:Oxidation (M):1000.00;C13:Carbamidomethylation:1000.00;M22:Oxidation (M):1000.00 | PEAKS DB  |
| R.EGEQEWGTPGSEVREETS.R.N                                          | Y    | 38.57  | 2161.9512 | 19     | -7.0 | 721.6542 | 3 | 28.61 | 11       | F11:1321 | OB5948 H3B Ro.raw | 0                  | 0        | 0                      | 147   | 165 |                                       |                                                                                                               | PEAKS DB  |
| E.PDLSNNFGR.L                                                     | N    | 38.29  | 1018.4832 | 9      | 1.2  | 510.2495 | 2 | 31.26 | 7        | F7:1478  | OB5951 H3A Ro.raw | 0                  | 0        | 0                      | 397   | 405 |                                       |                                                                                                               | PEAKS DB  |
| K.GTGNLELVAVRK.E                                                  | N    | 37.48  | 1255.7249 | 12     | -1.1 | 628.8690 | 2 | 28.81 | 8        | F8:1332  | OB5952 H3A Ro.raw | 1.1804E3           | 2        | 2                      | 453   | 464 |                                       |                                                                                                               | PEAKS DB  |
| K.NPQLQDLDM(+15.99)LTC(+57.02)VEIKEGALM(+15.99)LPHFNSK.A          | N    | 36.15  | 3403.6284 | 29     | 4.5  | 851.9182 | 4 | 36.31 | 7        | F7:1742  | OB5951 H3A Ro.raw | 1.3711E5           | 1        | 1                      | 415   | 443 | Carbamidomethylation                  | M10:Oxidation (M):0.00;C13:Carbamidomethylation:1000.00;M22:Oxidation (M):40.85                               | PEAKS DB  |
| R.IPSGFISYILN(+.98)RHDNQNL.R.V                                    | N    | 35.18  | 2257.1604 | 19     | 6.7  | 753.4007 | 3 | 36.32 | 11       | F11:1765 | OB5948 H3B Ro.raw | 5.0814E4           | 1        | 1                      | 260   | 278 |                                       | N11:Deamidation (NQ):11.12                                                                                    | PEAKS DB  |
| K.SFNLDEGHALRIPSGFISYILNRHDNQ(+.98)LR.V                           | N    | 34.85  | 3496.7600 | 30     | 4.9  | 700.3627 | 5 | 37.51 | 8        | F8:1925  | OB5952 H3A Ro.raw | 2.7478E5           | 1        | 1                      | 249   | 278 |                                       | N28:Deamidation (NQ):10.11                                                                                    | PEAKS DB  |
| K.NPQLQDLDM(+15.99)MLTC(+57.02)VEIKEGALMLPHFNSK.A                 | N    | 34.78  | 3387.6335 | 29     | 4.0  | 847.9191 | 4 | 38.06 | 9        | F9:1825  | OB5953 H3A Ro.raw | 2.0615E5           | 1        | 1                      | 415   | 443 | Carbamidomethylation                  | M9:Oxidation (M):0.00;C13:Carbamidomethylation:1000.00                                                        | PEAKS DB  |

total 63 peptides

| Peptide                                                   | Uniq | -10lgP | Mass      | Length | ppm  | m/z      | z | RT    | Fraction | Scan     | Source File       | Area Roast Ara h 3 | #Feature | #Feature Roast Ara h 3 | Start | End | PTM                  | AScore                                                                         | Found By  |
|-----------------------------------------------------------|------|--------|-----------|--------|------|----------|---|-------|----------|----------|-------------------|--------------------|----------|------------------------|-------|-----|----------------------|--------------------------------------------------------------------------------|-----------|
| K.NPQLQLDLM(+15.99)MLTC(+57.02)VEIKEGALM(+15.99)LPHFNSK,A | N    | 34.77  | 3403.6284 | 29     | 0.8  | 851.9150 | 4 | 37.70 | 8        | F8:1849  | OB5952 H3A Ro.raw | 1.9344E5           | 1        | 1                      | 415   | 443 | Carbamidomethylation | M9:Oxidation (M):24.44;C13:Carbamidomethylation:100.00;M22:Oxidation (M):19.27 | PEAKS DB  |
| R.SSDNEGIVKVSKEHVQELTK.H                                  | N    | 34.18  | 2325.2175 | 21     | -0.9 | 776.0791 | 3 | 30.32 | 9        | F9:1416  | OB5953 H3A Ro.raw | 4.7496E3           | 1        | 1                      | 351   | 371 |                      |                                                                                | PEAKS DB  |
| K.NPQLQLDLM(+15.99)M(+15.99)LTC(+57.02)VEIKEGALMLPHFNSK,A | N    | 32.60  | 3403.6284 | 29     | 1.4  | 851.9156 | 4 | 37.49 | 9        | F9:1800  | OB5953 H3A Ro.raw | 2.8417E5           | 1        | 1                      | 415   | 443 | Carbamidomethylation | M9:Oxidation (M):0.00;M10:Oxidation (M):0.00;C13:Carbamidomethylation:1000.00  | PEAKS DB  |
| R.EGEQ(+.98)EWGTPGSEVREETSR,N                             | Y    | 32.39  | 2162.9351 | 19     | 10.0 | 721.9944 | 3 | 28.65 | 11       | F11:1321 | OB5948 H3B Ro.raw | 9.7072E2           | 1        | 1                      | 147   | 165 | Deamidation (NQ)     | Q4:Deamidation (NQ):1000.00                                                    | PEAKS DB  |
| K.Q(-17.03)FQNLQNHR,I                                     | N    | 31.50  | 1166.5581 | 9      | -0.6 | 584.2859 | 2 | 28.13 | 7        | F7:1303  | OB5951 H3A Ro.raw | 4.0835E2           | 1        | 1                      | 199   | 207 | Pyro-glu from Q      | Q1:Pyro-glu from Q:1000.00                                                     | PEAKS PTM |
| total 63 peptides                                         |      |        |           |        |      |          |   |       |          |          |                   |                    |          |                        |       |     |                      |                                                                                |           |

N1NG13|N1NG13\_ARAHY

[back to list](#)

| [Protein Coverage](#) | [Supporting Peptides](#) |

Protein Coverage:



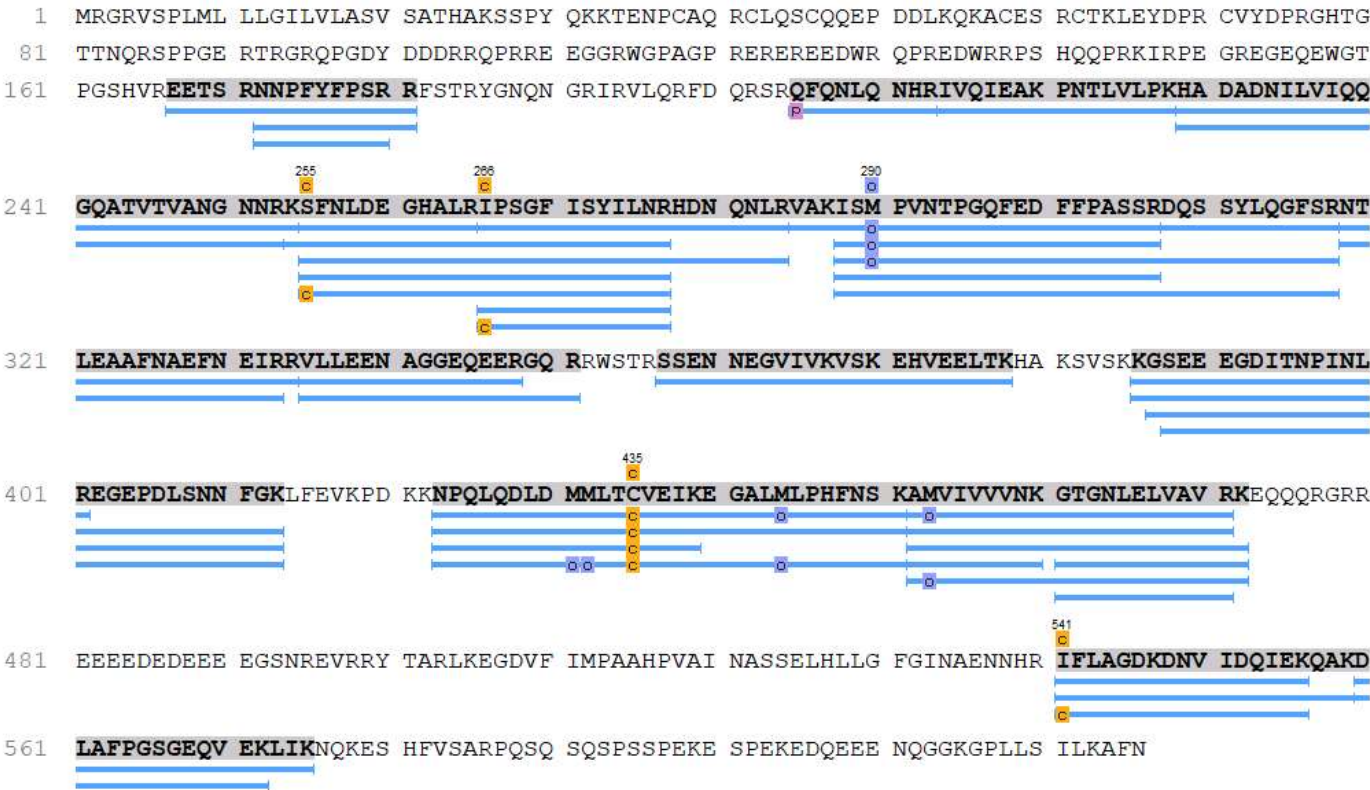

Carbamidomethylation (+57.02)  
Carbamidomethylation (DHKE, X@N-term) (+57.02)  
Oxidation (M) (+15.99)  
Pyro-glu from Q (-17.03)

Supporting Peptides:

| Peptide                          | Uniq | -10lgP | Mass      | Length | ppm  | m/z       | z | RT    | Fraction | Scan     | Source File       | Area Roast Ara h 3 | #Feature | #Feature Roast Ara h 3 | Start | End | PTM           | AScore                   | Found By |
|----------------------------------|------|--------|-----------|--------|------|-----------|---|-------|----------|----------|-------------------|--------------------|----------|------------------------|-------|-----|---------------|--------------------------|----------|
| K.ISMPVNTPGQFEDFFPASSR,D         | N    | 200,00 | 2226,0415 | 20     | 2,0  | 1114,0303 | 2 | 35,53 | 7        | F7:1725  | OB5951 H3A Ro.raw | 8,7598E5           | 6        | 6                      | 288   | 307 |               |                          | PEAKS DB |
| R.NTLEAAFNAEFNEIR,R              | N    | 165,72 | 1737,8322 | 15     | 1,8  | 869,9249  | 2 | 35,34 | 7        | F7:1714  | OB5951 H3A Ro.raw | 1,3226E6           | 6        | 6                      | 319   | 333 |               |                          | PEAKS DB |
| K.ISM(+15.99)PVNTPGQFEDFFPASSR,D | N    | 154,77 | 2242,0364 | 20     | 1,9  | 1122,0276 | 2 | 34,42 | 9        | F9:1655  | OB5953 H3A Ro.raw | 9,4493E5           | 6        | 5                      | 288   | 307 | Oxidation (M) | M3:Oxidation (M):1000,00 | PEAKS DB |
| R.IPSGFISYILNR,H                 | N    | 136,44 | 1378,7609 | 12     | 2,2  | 690,3892  | 2 | 37,11 | 9        | F9:1819  | OB5953 H3A Ro.raw | 5,8838E6           | 6        | 6                      | 266   | 277 |               |                          | PEAKS DB |
| K.SFNLDEGHALRIPSGFISYILNR,H      | N    | 130,32 | 2618,3604 | 23     | 0,7  | 873,7969  | 3 | 39,49 | 10       | F10:1795 | OB5926 H3B Ro.raw | 2,1577E7           | 15       | 15                     | 255   | 277 |               |                          | PEAKS DB |
| R.IFLAGDKDNVIDQIEK,Q             | N    | 127,66 | 1816,9570 | 16     | -1,4 | 909,4865  | 2 | 33,07 | 11       | F11:1576 | OB5948 H3B Ro.raw | 3,3211E6           | 12       | 11                     | 541   | 556 |               |                          | PEAKS DB |
| R.DQSSYLQGFSR,N                  | N    | 125,12 | 1286,5891 | 11     | -2,6 | 644,3015  | 2 | 30,77 | 11       | F11:1443 | OB5948 H3B Ro.raw | 3,7573E5           | 6        | 6                      | 308   | 318 |               |                          | PEAKS DB |

total 66 peptides



| Peptide                             | Uniq | -10lgP | Mass      | Length | ppm  | m/z       | z | RT    | Fraction | Scan     | Source File       | Area Roast Ara h 3 | #Feature | #Feature Roast Ara h 3 | Start | End | PTM                                   | AScore                                           | Found By  |
|-------------------------------------|------|--------|-----------|--------|------|-----------|---|-------|----------|----------|-------------------|--------------------|----------|------------------------|-------|-----|---------------------------------------|--------------------------------------------------|-----------|
| K.GSEEEGDITNPINLREGEPLSNNFGK.L      | Y    | 111.31 | 2930.3530 | 27     | 2.1  | 977.7936  | 3 | 32.13 | 9        | F9:1522  | OB5953 H3A Ro.raw | 2.0907E5           | 5        | 5                      | 387   | 413 |                                       |                                                  | PEAKS DB  |
| K.SFNLDEGHALR.I                     | N    | 110.09 | 1257.6101 | 11     | -2.6 | 629.8120  | 2 | 29.12 | 11       | F11:1344 | OB5948 H3B Ro.raw | 1.3894E5           | 10       | 10                     | 255   | 265 |                                       |                                                  | PEAKS DB  |
| K.DLAFIGSGEQVEKLIK.N                | N    | 103.34 | 1729.9249 | 16     | -1.4 | 865.9703  | 2 | 33.26 | 11       | F11:1597 | OB5948 H3B Ro.raw | 3.9305E5           | 5        | 4                      | 560   | 575 |                                       |                                                  | PEAKS DB  |
| R.VLLEENAGGEQEER.G                  | N    | 102.67 | 1571.7427 | 14     | 2.2  | 786.8804  | 2 | 27.19 | 9        | F9:1251  | OB5953 H3A Ro.raw | 9.5555E3           | 3        | 3                      | 335   | 348 |                                       |                                                  | PEAKS DB  |
| R.IFLAGDKDNVIDQIEKQAK.D             | N    | 100.84 | 2144.1477 | 19     | -0.2 | 715.7245  | 3 | 33.83 | 11       | F11:1613 | OB5948 H3B Ro.raw | 1.8641E6           | 6        | 6                      | 541   | 559 |                                       |                                                  | PEAKS DB  |
| R.NTLEAAFNAEFNEIRR.V                | N    | 96.95  | 1893.9332 | 16     | 2.8  | 947.9765  | 2 | 34.01 | 7        | F7:1637  | OB5951 H3A Ro.raw | 3.4558E7           | 12       | 11                     | 319   | 334 |                                       |                                                  | PEAKS DB  |
| R.IVQIEAKPNTLVLPK.H                 | Y    | 96.59  | 1662.0079 | 15     | 0.5  | 832.0117  | 2 | 30.42 | 9        | F9:1413  | OB5953 H3A Ro.raw | 6.1515E5           | 10       | 10                     | 214   | 228 |                                       |                                                  | PEAKS DB  |
| K.NPQLQDLDMMLTC(+57.02)VEIK.E       | N    | 94.07  | 2046.9788 | 17     | 3.3  | 1024.5000 | 2 | 36.94 | 7        | F7:1805  | OB5951 H3A Ro.raw | 0                  | 0        | 0                      | 423   | 439 | Carbamidomethylation                  | C13:Carbamidomethylation:1000.00                 | PEAKS DB  |
| R.IPSGFISYILNRHDNQNL.R.V            | N    | 93.37  | 2256.1763 | 19     | 0.1  | 565.0514  | 4 | 35.73 | 7        | F7:1716  | OB5951 H3A Ro.raw | 8.2074E6           | 11       | 11                     | 266   | 284 |                                       |                                                  | PEAKS DB  |
| R.I(+57.02)PSGFISYILNR.H            | N    | 91.10  | 1435.7823 | 12     | 0.7  | 718.8989  | 2 | 36.87 | 7        | F7:1795  | OB5951 H3A Ro.raw | 7.2345E4           | 3        | 3                      | 266   | 277 | Carbamidomethylation (DHKE, X@N-term) | I1:Carbamidomethylation (DHKE, X@N-term):1000.00 | PEAKS PTM |
| R.NNPFYFPSRR.F                      | N    | 90.91  | 1296.6364 | 10     | 0.1  | 649.3255  | 2 | 30.10 | 9        | F9:1398  | OB5953 H3A Ro.raw | 4.2765E5           | 8        | 8                      | 172   | 181 |                                       |                                                  | PEAKS DB  |
| K.GTGNLELVAVR.K                     | N    | 87.71  | 1127.6299 | 11     | 4.8  | 564.8250  | 2 | 30.09 | 9        | F9:1403  | OB5953 H3A Ro.raw | 2.2478E3           | 1        | 1                      | 461   | 471 |                                       |                                                  | PEAKS DB  |
| K.AM(+15.99)VIVVVNKG TGNLELVAVR.K   | N    | 87.55  | 2097.1980 | 20     | 1.6  | 1049.6079 | 2 | 32.67 | 7        | F7:1560  | OB5951 H3A Ro.raw | 2.6865E5           | 3        | 3                      | 452   | 471 | Oxidation (M)                         | M2:Oxidation (M):1000.00                         | PEAKS DB  |
| K.DLAFIGSGEQVEK.L                   | N    | 85.86  | 1375.6619 | 13     | -0.7 | 688.8392  | 2 | 30.28 | 11       | F11:1414 | OB5948 H3B Ro.raw | 1.4145E5           | 4        | 4                      | 560   | 572 |                                       |                                                  | PEAKS DB  |
| K.AMVIVVVNKG TGNLELVAVR.K           | N    | 83.81  | 2081.2031 | 20     | 1.7  | 1041.6106 | 2 | 34.96 | 7        | F7:1704  | OB5951 H3A Ro.raw | 2.013E6            | 4        | 4                      | 452   | 471 |                                       |                                                  | PEAKS DB  |
| R.NNPFYFPSR.R                       | N    | 81.75  | 1140.5352 | 9      | 0.1  | 571.2749  | 2 | 31.76 | 8        | F8:1498  | OB5952 H3A Ro.raw | 1.1774E5           | 3        | 3                      | 172   | 180 |                                       |                                                  | PEAKS DB  |
| K.SFNLDEGHALRIPSGFISYILNRHDNQNL.R.V | N    | 79.13  | 3495.7759 | 30     | 1.5  | 700.1635  | 5 | 39.97 | 9        | F9:1987  | OB5953 H3A Ro.raw | 2.0697E7           | 15       | 15                     | 255   | 284 |                                       |                                                  | PEAKS DB  |
| K.HADADNIIQGGQATVTVAN(+.98)GNNRK.S  | N    | 78.05  | 2747.3950 | 26     | 1.8  | 916.8073  | 3 | 30.31 | 8        | F8:1428  | OB5952 H3A Ro.raw | 8.0166E4           | 3        | 3                      | 229   | 254 |                                       | N21:Deamidation (NQ):14.04                       | PEAKS DB  |
| K.KGSEEEGDITNPINLR.E                | Y    | 75.97  | 1770.8748 | 16     | -1.1 | 591.2982  | 3 | 29.41 | 9        | F9:1365  | OB5953 H3A Ro.raw | 5.9957E3           | 3        | 3                      | 386   | 401 |                                       |                                                  | PEAKS DB  |
| K.AMVIVVVNKG TGNLELVAVR.K           | N    | 75.76  | 2209.2981 | 21     | -1.5 | 737.4407  | 3 | 35.66 | 10       | F10:1586 | OB5926 H3B Ro.raw | 3.5137E6           | 8        | 8                      | 452   | 472 |                                       |                                                  | PEAKS DB  |
| K.ISMPVNTPGQFEDFFPASSRDQSSYLQGFSR.N | N    | 74.46  | 3494.6201 | 31     | 0.8  | 1165.8840 | 3 | 36.12 | 11       | F11:1762 | OB5948 H3B Ro.raw | 2.9084E6           | 5        | 5                      | 288   | 318 |                                       |                                                  | PEAKS DB  |
| total 66 peptides                   |      |        |           |        |      |           |   |       |          |          |                   |                    |          |                        |       |     |                                       |                                                  |           |

| Peptide                                           | Uniq | -10lgP | Mass      | Length | ppm  | m/z       | z | RT    | Fraction | Scan     | Source File       | Area Roast Ara h 3 | #Feature | #Feature Roast Ara h 3 | Start | End | PTM                                   | AScore                                                   | Found By  |
|---------------------------------------------------|------|--------|-----------|--------|------|-----------|---|-------|----------|----------|-------------------|--------------------|----------|------------------------|-------|-----|---------------------------------------|----------------------------------------------------------|-----------|
| G.SEEEGDITNPINLREGEPLDLSNFGK.L                    | Y    | 71.24  | 2873.3315 | 26     | 0.5  | 958.7869  | 3 | 32.19 | 11       | F11:1534 | OB5948 H3B Ro.raw | 1.9904E4           | 1        | 1                      | 388   | 413 |                                       |                                                          | PEAKS DB  |
| R.KSFNLDEGHALRIPSGFISYLNR.H                       | N    | 70.24  | 2746.4553 | 24     | 1.8  | 687.6223  | 4 | 39.03 | 8        | F8:1914  | OB5952 H3A Ro.raw | 3.7974E5           | 2        | 2                      | 254   | 277 |                                       |                                                          | PEAKS DB  |
| R.I(+57.02)FLAGDKDNVIDQIEK.Q                      | N    | 66.79  | 1873.9785 | 16     | -2.1 | 937.9969  | 2 | 33.39 | 10       | F10:1458 | OB5926 H3B Ro.raw | 2.2898E4           | 1        | 1                      | 541   | 556 | Carbamidomethylation (DHKE, X@N-term) | I1:Carbamidomethylation (D HKE, X@N-term):56.99          | PEAKS PTM |
| K.HADADNIIQQGQATVTVANGNNR.K                       | N    | 65.50  | 2618.3162 | 25     | 0.5  | 873.7798  | 3 | 30.34 | 7        | F7:1426  | OB5951 H3A Ro.raw | 1.8654E3           | 1        | 1                      | 229   | 253 |                                       |                                                          | PEAKS DB  |
| K.KGSEEEGDITNPINLREGEPLDLSNFGK.L                  | Y    | 62.77  | 3058.4478 | 28     | 4.3  | 1020.4943 | 3 | 31.17 | 9        | F9:1469  | OB5953 H3A Ro.raw | 8.012E4            | 3        | 3                      | 386   | 413 |                                       |                                                          | PEAKS DB  |
| K.HADADNIIQQGQATVTVANGNNRK.S                      | N    | 62.55  | 2746.4111 | 26     | 0.2  | 916.4778  | 3 | 29.66 | 7        | F7:1385  | OB5951 H3A Ro.raw | 6.7701E4           | 2        | 2                      | 229   | 254 |                                       |                                                          | PEAKS DB  |
| K.ISM(+15.99)PVNTPGQFEDFFPASSRDQSSYLQGFNR.N       | N    | 62.16  | 3510.6150 | 31     | -1.8 | 1171.2126 | 3 | 35.35 | 11       | F11:1707 | OB5948 H3B Ro.raw | 2.4799E6           | 5        | 5                      | 288   | 318 | Oxidation (M)                         | M3:Oxidation (M):1000.00                                 | PEAKS DB  |
| R.EETSRNPNFYFSPRR.F                               | N    | 62.14  | 1898.9023 | 15     | -0.7 | 633.9758  | 3 | 30.73 | 10       | F10:1288 | OB5926 H3B Ro.raw | 1.7594E4           | 1        | 1                      | 167   | 181 |                                       |                                                          | PEAKS DB  |
| K.GSEEEGDITN(+.98)PINLREGEPLDLSNFGK.L             | Y    | 61.63  | 2931.3369 | 27     | 9.2  | 978.1306  | 3 | 32.21 | 11       | F11:1532 | OB5948 H3B Ro.raw | 9.2634E3           | 1        | 1                      | 387   | 413 |                                       | N10:Deamidation (NQ):25.20                               | PEAKS DB  |
| K.NPQLQDLDMMLTC(+57.02)VEIKEGALMLPHFNSK.A         | N    | 59.27  | 3371.6387 | 29     | -0.3 | 843.9188  | 4 | 39.49 | 10       | F10:1807 | OB5926 H3B Ro.raw | 8.6484E5           | 3        | 3                      | 423   | 451 | Carbamidomethylation                  | C13:Carbamidomethylation:1000.00                         | PEAKS DB  |
| K.NPQLQDLDMMLTC(+57.02)VEIKEGALM(+15.99)LPHFNSK.A | N    | 58.64  | 3387.6335 | 29     | 1.2  | 847.9185  | 4 | 38.07 | 11       | F11:1874 | OB5948 H3B Ro.raw | 3.9631E5           | 2        | 2                      | 423   | 451 | Carbamidomethylation; Oxidation (M)   | C13:Carbamidomethylation:1000.00;M22:Oxidation (M):51.99 | PEAKS DB  |
| K.NPQLQDLDM(+15.99)MLTC(+57.02)VEIK.E             | N    | 57.29  | 2062.9736 | 17     | 2.8  | 1032.4969 | 2 | 36.63 | 9        | F9:1780  | OB5953 H3A Ro.raw | 0                  | 0        | 0                      | 423   | 439 | Carbamidomethylation                  | M9:Oxidation (M):24.44;C13:Carbamidomethylation:1000.00  | PEAKS DB  |
| R.NTLEAAFN(+.98)AEFNEIRR.V                        | N    | 56.23  | 1894.9172 | 16     | 0.4  | 948.4663  | 2 | 32.13 | 9        | F9:1524  | OB5953 H3A Ro.raw | 1.3345E4           | 2        | 2                      | 319   | 334 |                                       | N8:Deamidation (NQ):20.76                                | PEAKS DB  |
| R.SSENNEGVIVKVSKEHVEELTK.H                        | Y    | 54.00  | 2454.2603 | 22     | 1.5  | 819.0952  | 3 | 30.81 | 8        | F8:1445  | OB5952 H3A Ro.raw | 1.1749E4           | 1        | 1                      | 357   | 378 |                                       |                                                          | PEAKS DB  |
| R.VLLEENAGGEQEERQGR.R                             | N    | 52.47  | 1912.9238 | 17     | -2.1 | 638.6472  | 3 | 28.03 | 8        | F8:1297  | OB5952 H3A Ro.raw | 8.2166E3           | 2        | 2                      | 335   | 351 |                                       |                                                          | PEAKS DB  |
| R.NTLEAAFNAEFN(+.98)EIRR.V                        | N    | 50.81  | 1894.9172 | 16     | 1.9  | 948.4677  | 2 | 32.67 | 7        | F7:1563  | OB5951 H3A Ro.raw | 9.2576E4           | 2        | 2                      | 319   | 334 |                                       | N12:Deamidation (NQ):8.26                                | PEAKS DB  |
| K.HADADNIIQQGQATVTVANGN(+.98)NRK.S                | N    | 50.48  | 2747.3950 | 26     | -4.1 | 916.8038  | 3 | 30.36 | 11       | F11:1426 | OB5948 H3B Ro.raw | 0                  | 0        | 0                      | 229   | 254 |                                       | N23:Deamidation (NQ):9.40                                | PEAKS DB  |
| K.S(+57.02)FNLDEGHALRIPSGFISYLNR.H                | N    | 49.55  | 2675.3818 | 23     | 2.3  | 892.8033  | 3 | 39.35 | 7        | F7:1901  | OB5951 H3A Ro.raw | 6.7035E5           | 1        | 1                      | 255   | 277 | Carbamidomethylation (DHKE, X@N-term) | S1:Carbamidomethylation (D HKE, X@N-term):63.97          | PEAKS PTM |
| R.IFLAGD(+57.02)KDNVIDQIEK.Q                      | N    | 45.63  | 1873.9785 | 16     | 1.4  | 937.9978  | 2 | 33.53 | 12       | F12:1622 | OB5949 H3B Ro.raw | 3.5356E3           | 1        | 1                      | 541   | 556 |                                       | D6:Carbamidomethylation (D HKE, X@N-term):15.57          | PEAKS PTM |

total 66 peptides

| Peptide                                                           | Uniq | -10lgP | Mass      | Length | ppm  | m/z      | z | RT    | Fraction | Scan     | Source File       | Area Roast Ara h 3 | #Feature | #Feature Roast Ara h 3 | Start | End | PTM                                 | AScore                                                                                                        | Found By  |
|-------------------------------------------------------------------|------|--------|-----------|--------|------|----------|---|-------|----------|----------|-------------------|--------------------|----------|------------------------|-------|-----|-------------------------------------|---------------------------------------------------------------------------------------------------------------|-----------|
| K.HADADNILVIQQGQ(+.98)ATVTVANGNNRK.S                              | N    | 45.21  | 2747.3950 | 26     | 2.6  | 916.8103 | 3 | 30.46 | 10       | F10:1280 | OB5926 H3B Ro.raw | 0                  | 0        | 0                      | 229   | 254 |                                     | Q14:Deamidation (NQ):0.00                                                                                     | PEAKS DB  |
| K.AM(+15.99)VIVVVNKG TGNLELVAVRK.E                                | N    | 45.01  | 2225.2930 | 21     | -1.5 | 742.7723 | 3 | 33.77 | 10       | F10:1559 | OB5926 H3B Ro.raw | 4.0307E5           | 2        | 2                      | 452   | 472 | Oxidation (M)                       | M2:Oxidation (M):1000.00                                                                                      | PEAKS DB  |
| R.VAKISM(+15.99)PVNTPGQFEDFFPASSR.D                               | N    | 44.60  | 2540.2368 | 23     | 3.4  | 847.7558 | 3 | 33.41 | 8        | F8:1598  | OB5952 H3A Ro.raw | 0                  | 0        | 0                      | 285   | 307 | Oxidation (M)                       | M6:Oxidation (M):1000.00                                                                                      | PEAKS DB  |
| K.AMVIVVVNK.G                                                     | N    | 42.66  | 971.5837  | 9      | -3.0 | 486.7977 | 2 | 29.40 | 7        | F7:1370  | OB5951 H3A Ro.raw | 0                  | 0        | 0                      | 452   | 460 |                                     |                                                                                                               | PEAKS DB  |
| R.N(+.98)TLEAAFNAEFNEIRR.V                                        | N    | 42.24  | 1894.9172 | 16     | 3.2  | 948.4689 | 2 | 33.46 | 8        | F8:1601  | OB5952 H3A Ro.raw | 5.9553E4           | 1        | 1                      | 319   | 334 |                                     | N1:Deamidation (NQ):34.75                                                                                     | PEAKS DB  |
| R.I(+57.02)VQIEAKPNTLVLPK.H                                       | Y    | 39.31  | 1719.0294 | 15     | 0.6  | 860.5225 | 2 | 30.81 | 8        | F8:1447  | OB5952 H3A Ro.raw | 7.5816E3           | 1        | 1                      | 214   | 228 |                                     | I1:Carbamidomethylation (D HKE, X@N-term):28.70                                                               | PEAKS PTM |
| K.NPQLQLDLM(+15.99)M(+15.99)LTC(+57.02)VEIKEGALM(+15.99)LPHFNSK.A | N    | 39.18  | 3419.6233 | 29     | 1.7  | 855.9146 | 4 | 35.97 | 8        | F8:1751  | OB5952 H3A Ro.raw | 6.0894E4           | 1        | 1                      | 423   | 451 | Oxidation (M); Carbamidomethylation | M9:Oxidation (M):1000.00;M10:Oxidation (M):1000.00;C13:Carbamidomethylation:1000.00;M22:Oxidation (M):1000.00 | PEAKS DB  |
| K.KGSEEEGDITNPINLREGE PDLSN(+.98)NFGK.L                           | Y    | 39.05  | 3059.4319 | 28     | 0.6  | 765.8674 | 4 | 31.36 | 11       | F11:1485 | OB5948 H3B Ro.raw | 0                  | 0        | 0                      | 386   | 413 |                                     | N24:Deamidation (NQ):0.00                                                                                     | PEAKS DB  |
| K.GTGNLELVAVRK.E                                                  | N    | 37.48  | 1255.7249 | 12     | -1.1 | 628.8690 | 2 | 28.81 | 8        | F8:1332  | OB5952 H3A Ro.raw | 1.1804E3           | 2        | 2                      | 461   | 472 |                                     |                                                                                                               | PEAKS DB  |
| K.NPQLQLDMM(+15.99)LTC(+57.02)VEIKEGALM(+15.99)LPHFNSK.A          | N    | 36.15  | 3403.6284 | 29     | 4.5  | 851.9182 | 4 | 36.31 | 7        | F7:1742  | OB5951 H3A Ro.raw | 1.3711E5           | 1        | 1                      | 423   | 451 | Carbamidomethylation                | M10:Oxidation (M):0.00;C13:Carbamidomethylation:1000.00;M22:Oxidation (M):40.85                               | PEAKS DB  |
| G.SEEEGDITNPIN(+.98)LREGE PDLSN NFGK.L                            | Y    | 35.57  | 2874.3154 | 26     | 4.6  | 959.1188 | 3 | 32.12 | 11       | F11:1534 | OB5948 H3B Ro.raw | 1.1098E4           | 1        | 1                      | 388   | 413 |                                     | N12:Deamidation (NQ):0.00                                                                                     | PEAKS DB  |
| R.IPSGFISYILN(+.98)RHDNQNL.R.V                                    | N    | 35.18  | 2257.1604 | 19     | 6.7  | 753.4007 | 3 | 36.32 | 11       | F11:1765 | OB5948 H3B Ro.raw | 5.0814E4           | 1        | 1                      | 266   | 284 |                                     | N11:Deamidation (NQ):11.12                                                                                    | PEAKS DB  |
| K.SFNLDEGHALRIPSGFISYILNRHDNQN(+.98)LR.V                          | N    | 34.85  | 3496.7600 | 30     | 4.9  | 700.3627 | 5 | 37.51 | 8        | F8:1925  | OB5952 H3A Ro.raw | 2.7478E5           | 1        | 1                      | 255   | 284 |                                     | N28:Deamidation (NQ):10.11                                                                                    | PEAKS DB  |
| K.NPQLQLDLM(+15.99)MLTC(+57.02)VEIKEGALMLPHFNSK.A                 | N    | 34.78  | 3387.6335 | 29     | 4.0  | 847.9191 | 4 | 38.06 | 9        | F9:1825  | OB5953 H3A Ro.raw | 2.0615E5           | 1        | 1                      | 423   | 451 | Carbamidomethylation                | M9:Oxidation (M):0.00;C13:Carbamidomethylation:1000.00                                                        | PEAKS DB  |
| K.NPQLQLDLM(+15.99)MLTC(+57.02)VEIKEGALM(+15.99)LPHFNSK.A         | N    | 34.77  | 3403.6284 | 29     | 0.8  | 851.9150 | 4 | 37.70 | 8        | F8:1849  | OB5952 H3A Ro.raw | 1.9344E5           | 1        | 1                      | 423   | 451 | Carbamidomethylation                | M9:Oxidation (M):24.44;C13:Carbamidomethylation:1000.00;M22:Oxidation (M):19.27                               | PEAKS DB  |
| R.IVQ(+.98)IEAKPNTLVLPK.H                                         | Y    | 32.72  | 1662.9919 | 15     | 6.9  | 832.5090 | 2 | 31.77 | 12       | F12:1516 | OB5949 H3B Ro.raw | 0                  | 0        | 0                      | 214   | 228 |                                     | Q3:Deamidation (NQ):22.09                                                                                     | PEAKS DB  |

total 66 peptides

| Peptide                                                  | Uniq | -10lgP | Mass      | Length | ppm  | m/z      | z | RT    | Fraction | Scan    | Source File       | Area Roast Ara h 3 | #Feature | #Feature Roast Ara h 3 | Start | End | PTM                  | AScore                                                                        | Found By  |
|----------------------------------------------------------|------|--------|-----------|--------|------|----------|---|-------|----------|---------|-------------------|--------------------|----------|------------------------|-------|-----|----------------------|-------------------------------------------------------------------------------|-----------|
| K.NPQLQLDM(+15.99)M(+15.99)LTC(+57.02)VEIKEGALMLPHFNSK.A | N    | 32.60  | 3403.6284 | 29     | 1.4  | 851.9156 | 4 | 37.49 | 9        | F9:1800 | OB5953 H3A Ro.raw | 2.8417E5           | 1        | 1                      | 423   | 451 | Carbamidomethylation | M9:Oxidation (M):0.00;M10:Oxidation (M):0.00;C13:Carbamidomethylation:1000.00 | PEAKS DB  |
| K.KGSEEEGDITNPINLREGEPLDLSNN(+.98)FGK.L                  | Y    | 32.29  | 3059.4319 | 28     | 8.8  | 765.8720 | 4 | 31.05 | 7        | F7:1466 | OB5951 H3A Ro.raw | 0                  | 0        | 0                      | 386   | 413 |                      | N25:Deamidation (NQ):0.00                                                     | PEAKS DB  |
| R.Q(-17.03)FQNLQNHR.I                                    | N    | 31.50  | 1166.5581 | 9      | -0.6 | 584.2859 | 2 | 28.13 | 7        | F7:1303 | OB5951 H3A Ro.raw | 4.0835E2           | 1        | 1                      | 205   | 213 | Pyro-glu from Q      | Q1:Pyro-glu from Q:1000.00                                                    | PEAKS PTM |
| total 66 peptides                                        |      |        |           |        |      |          |   |       |          |         |                   |                    |          |                        |       |     |                      |                                                                               |           |

sp|P43238|ALL12\_ARAHY

back to list

| [Protein Coverage](#) | [Supporting Peptides](#) |

Protein Coverage:

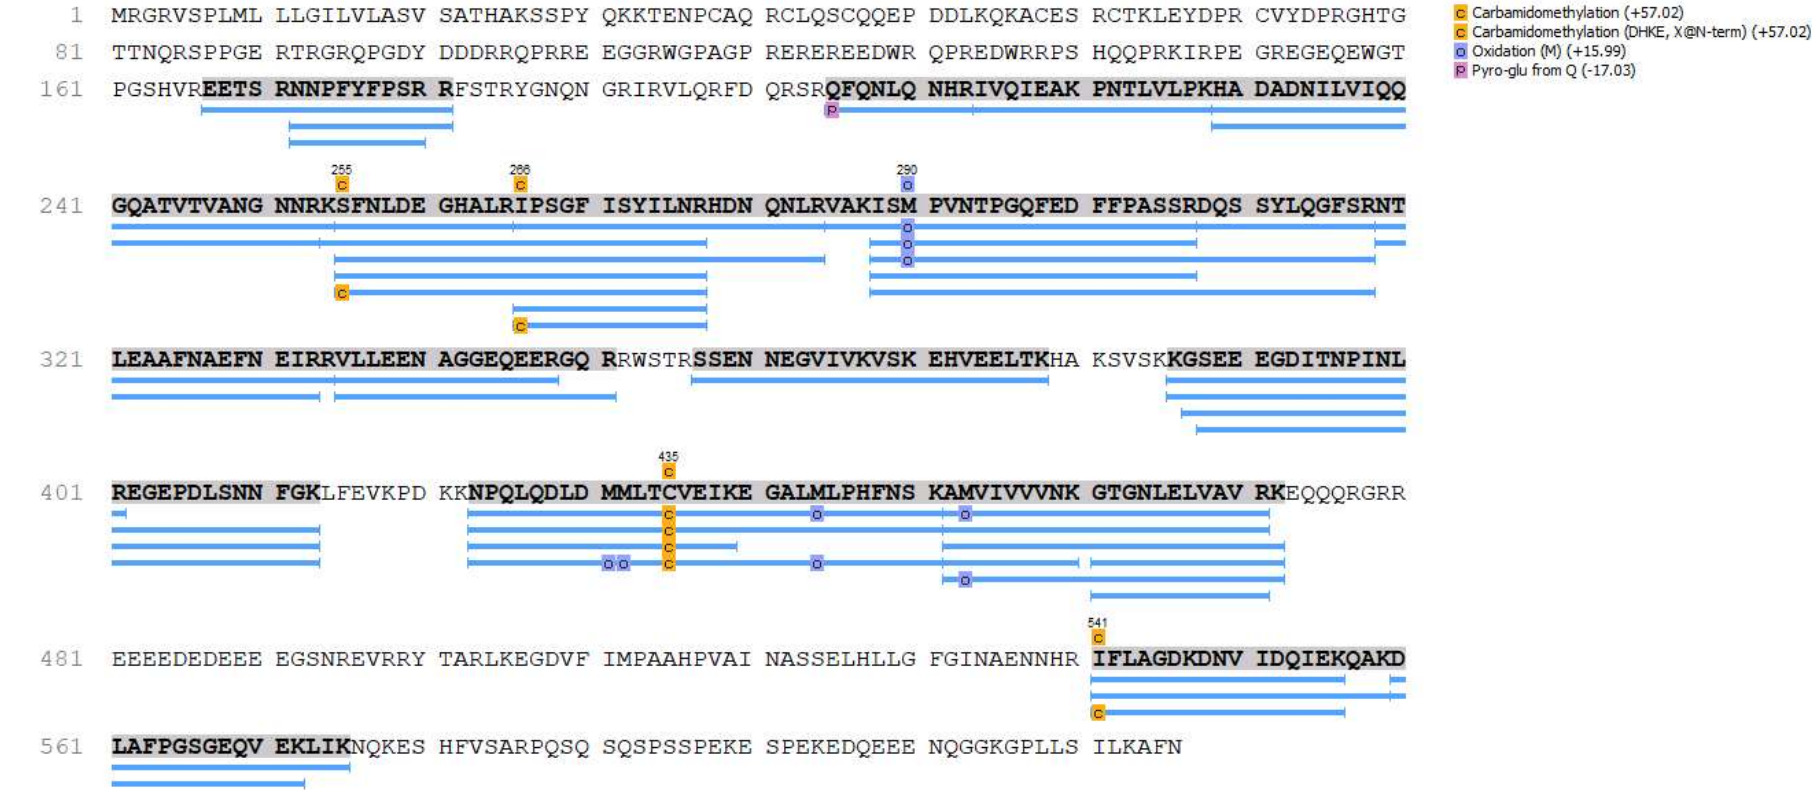

Supporting Peptides:

| Peptide           | Uniq | -10lgP | Mass | Length | ppm | m/z | z | RT | Fraction | Scan | Source File | Area Roast Ara h 3 | #Feature | #Feature Roast Ara h 3 | Start | End | PTM | AScore | Found By |
|-------------------|------|--------|------|--------|-----|-----|---|----|----------|------|-------------|--------------------|----------|------------------------|-------|-----|-----|--------|----------|
| total 66 peptides |      |        |      |        |     |     |   |    |          |      |             |                    |          |                        |       |     |     |        |          |

| Peptide                            | Uniq | -10lgP | Mass      | Length | ppm  | m/z       | z | RT    | Fraction | Scan     | Source File       | Area Roast Ara h 3 | #Feature | #Feature Roast Ara h 3 | Start | End | PTM                                   | AScore                                           | Found By  |
|------------------------------------|------|--------|-----------|--------|------|-----------|---|-------|----------|----------|-------------------|--------------------|----------|------------------------|-------|-----|---------------------------------------|--------------------------------------------------|-----------|
| K.ISMPVNTPGQFEDFFPASSR,D           | N    | 200.00 | 2226.0415 | 20     | 2.0  | 1114.0303 | 2 | 35.53 | 7        | F7:1725  | OB5951 H3A Ro.raw | 8.7598E5           | 6        | 6                      | 288   | 307 |                                       |                                                  | PEAKS DB  |
| R.NTLEAAFNAEFNEIR,R                | N    | 165.72 | 1737.8322 | 15     | 1.8  | 869.9249  | 2 | 35.34 | 7        | F7:1714  | OB5951 H3A Ro.raw | 1.3226E6           | 6        | 6                      | 319   | 333 |                                       |                                                  | PEAKS DB  |
| K.ISM(+15.99)PVNTPGQFEDFFPASSR,D   | N    | 154.77 | 2242.0364 | 20     | 1.9  | 1122.0276 | 2 | 34.42 | 9        | F9:1655  | OB5953 H3A Ro.raw | 9.4493E5           | 6        | 5                      | 288   | 307 | Oxidation (M)                         | M3:Oxidation (M):1000.00                         | PEAKS DB  |
| R.IPSGFISYILNR,H                   | N    | 136.44 | 1378.7609 | 12     | 2.2  | 690.3892  | 2 | 37.11 | 9        | F9:1819  | OB5953 H3A Ro.raw | 5.8838E6           | 6        | 6                      | 266   | 277 |                                       |                                                  | PEAKS DB  |
| K.SFNLDEGHALRIPSGFISYILNR,H        | N    | 130.32 | 2618.3604 | 23     | 0.7  | 873.7969  | 3 | 39.49 | 10       | F10:1795 | OB5926 H3B Ro.raw | 2.1577E7           | 15       | 15                     | 255   | 277 |                                       |                                                  | PEAKS DB  |
| R.IFLAGDKDNVIDQIEK,Q               | N    | 127.66 | 1816.9570 | 16     | -1.4 | 909.4865  | 2 | 33.07 | 11       | F11:1576 | OB5948 H3B Ro.raw | 3.3211E6           | 12       | 11                     | 541   | 556 |                                       |                                                  | PEAKS DB  |
| R.DQSSYLQGFSR,N                    | N    | 125.12 | 1286.5891 | 11     | -2.6 | 644.3015  | 2 | 30.77 | 11       | F11:1443 | OB5948 H3B Ro.raw | 3.7573E5           | 6        | 6                      | 308   | 318 |                                       |                                                  | PEAKS DB  |
| K.GSEEEGDITNPINLREGEPLSNNFGK,L     | Y    | 111.31 | 2930.3530 | 27     | 2.1  | 977.7936  | 3 | 32.13 | 9        | F9:1522  | OB5953 H3A Ro.raw | 2.0907E5           | 5        | 5                      | 387   | 413 |                                       |                                                  | PEAKS DB  |
| K.SFNLDEGHALR,I                    | N    | 110.09 | 1257.6101 | 11     | -2.6 | 629.8120  | 2 | 29.12 | 11       | F11:1344 | OB5948 H3B Ro.raw | 1.3894E5           | 10       | 10                     | 255   | 265 |                                       |                                                  | PEAKS DB  |
| K.DLAFPGSGEQVEKLIK,N               | N    | 103.34 | 1729.9249 | 16     | -1.4 | 865.9703  | 2 | 33.26 | 11       | F11:1597 | OB5948 H3B Ro.raw | 3.9305E5           | 5        | 4                      | 560   | 575 |                                       |                                                  | PEAKS DB  |
| R.VLLEENAGGEQEER,G                 | N    | 102.67 | 1571.7427 | 14     | 2.2  | 786.8804  | 2 | 27.19 | 9        | F9:1251  | OB5953 H3A Ro.raw | 9.5555E3           | 3        | 3                      | 335   | 348 |                                       |                                                  | PEAKS DB  |
| R.IFLAGDKDNVIDQIEKQAK,D            | N    | 100.84 | 2144.1477 | 19     | -0.2 | 715.7245  | 3 | 33.83 | 11       | F11:1613 | OB5948 H3B Ro.raw | 1.8641E6           | 6        | 6                      | 541   | 559 |                                       |                                                  | PEAKS DB  |
| R.NTLEAAFNAEFNEIRR,V               | N    | 96.95  | 1893.9332 | 16     | 2.8  | 947.9765  | 2 | 34.01 | 7        | F7:1637  | OB5951 H3A Ro.raw | 3.4558E7           | 12       | 11                     | 319   | 334 |                                       |                                                  | PEAKS DB  |
| R.IVQIEAKPNTLVLPK,H                | Y    | 96.59  | 1662.0079 | 15     | 0.5  | 832.0117  | 2 | 30.42 | 9        | F9:1413  | OB5953 H3A Ro.raw | 6.1515E5           | 10       | 10                     | 214   | 228 |                                       |                                                  | PEAKS DB  |
| K.NPQLQLDMLMTC(+57.02)VEIK,E       | N    | 94.07  | 2046.9788 | 17     | 3.3  | 1024.5000 | 2 | 36.94 | 7        | F7:1805  | OB5951 H3A Ro.raw | 0                  | 0        | 0                      | 423   | 439 | Carbamidomethylation                  | C13:Carbamidomethylation:1000.00                 | PEAKS DB  |
| R.IPSGFISYILNRHDNQNLR,V            | N    | 93.37  | 2256.1763 | 19     | 0.1  | 565.0514  | 4 | 35.73 | 7        | F7:1716  | OB5951 H3A Ro.raw | 8.2074E6           | 11       | 11                     | 266   | 284 |                                       |                                                  | PEAKS DB  |
| R,I(+57.02)PSGFISYILNR,H           | N    | 91.10  | 1435.7823 | 12     | 0.7  | 718.8989  | 2 | 36.87 | 7        | F7:1795  | OB5951 H3A Ro.raw | 7.2345E4           | 3        | 3                      | 266   | 277 | Carbamidomethylation (DHKE, X@N-term) | I1:Carbamidomethylation (DHKE, X@N-term):1000.00 | PEAKS PTM |
| R.NNPFYFPSRR,F                     | N    | 90.91  | 1296.6364 | 10     | 0.1  | 649.3255  | 2 | 30.10 | 9        | F9:1398  | OB5953 H3A Ro.raw | 4.2765E5           | 8        | 8                      | 172   | 181 |                                       |                                                  | PEAKS DB  |
| K.GTGNLELVAVR,K                    | N    | 87.71  | 1127.6299 | 11     | 4.8  | 564.8250  | 2 | 30.09 | 9        | F9:1403  | OB5953 H3A Ro.raw | 2.2478E3           | 1        | 1                      | 461   | 471 |                                       |                                                  | PEAKS DB  |
| K.AM(+15.99)VIVVVNKGSGTGNLELVAVR,K | N    | 87.55  | 2097.1980 | 20     | 1.6  | 1049.6079 | 2 | 32.67 | 7        | F7:1560  | OB5951 H3A Ro.raw | 2.6865E5           | 3        | 3                      | 452   | 471 | Oxidation (M)                         | M2:Oxidation (M):1000.00                         | PEAKS DB  |
| K.DLAFPGSGEQVEK,L                  | N    | 85.86  | 1375.6619 | 13     | -0.7 | 688.8392  | 2 | 30.28 | 11       | F11:1414 | OB5948 H3B Ro.raw | 1.4145E5           | 4        | 4                      | 560   | 572 |                                       |                                                  | PEAKS DB  |
| total 66 peptides                  |      |        |           |        |      |           |   |       |          |          |                   |                    |          |                        |       |     |                                       |                                                  |           |

| Peptide                                           | Uniq | -10lgP | Mass      | Length | ppm  | m/z       | z | RT    | Fraction | Scan     | Source File       | Area Roast Ara h 3 | #Feature | #Feature Roast Ara h 3 | Start | End | PTM                                         | AScore                                                   | Found By  |
|---------------------------------------------------|------|--------|-----------|--------|------|-----------|---|-------|----------|----------|-------------------|--------------------|----------|------------------------|-------|-----|---------------------------------------------|----------------------------------------------------------|-----------|
| K.AMVIVVVKGTGNLELVAVR.K                           | N    | 83.81  | 2081.2031 | 20     | 1.7  | 1041.6106 | 2 | 34.96 | 7        | F7:1704  | OB5951 H3A Ro.raw | 2.013E6            | 4        | 4                      | 452   | 471 |                                             |                                                          | PEAKS DB  |
| R.NNPFYFPSR.R                                     | N    | 81.75  | 1140.5352 | 9      | 0.1  | 571.2749  | 2 | 31.76 | 8        | F8:1498  | OB5952 H3A Ro.raw | 1.1774E5           | 3        | 3                      | 172   | 180 |                                             |                                                          | PEAKS DB  |
| K.SFNLDEGHALRIPSGFISYILNRHDNQNL.R.V               | N    | 79.13  | 3495.7759 | 30     | 1.5  | 700.1635  | 5 | 39.97 | 9        | F9:1987  | OB5953 H3A Ro.raw | 2.0697E7           | 15       | 15                     | 255   | 284 |                                             |                                                          | PEAKS DB  |
| K.HADADNIIQQGQATVTVAN(+.98)GNNRK.S                | N    | 78.05  | 2747.3950 | 26     | 1.8  | 916.8073  | 3 | 30.31 | 8        | F8:1428  | OB5952 H3A Ro.raw | 8.0166E4           | 3        | 3                      | 229   | 254 | N21:Deamidation (NQ):14.04                  |                                                          | PEAKS DB  |
| K.KGSEEEGDITNPINLR.E                              | Y    | 75.97  | 1770.8748 | 16     | -1.1 | 591.2982  | 3 | 29.41 | 9        | F9:1365  | OB5953 H3A Ro.raw | 5.9957E3           | 3        | 3                      | 386   | 401 |                                             |                                                          | PEAKS DB  |
| K.AMVIVVVKGTGNLELVAVR.E                           | N    | 75.76  | 2209.2981 | 21     | -1.5 | 737.4407  | 3 | 35.66 | 10       | F10:1586 | OB5926 H3B Ro.raw | 3.5137E6           | 8        | 8                      | 452   | 472 |                                             |                                                          | PEAKS DB  |
| K.ISMPVNTPGQFEDFFPASSRDQSSYLQGFSR.N               | N    | 74.46  | 3494.6201 | 31     | 0.8  | 1165.8840 | 3 | 36.12 | 11       | F11:1762 | OB5948 H3B Ro.raw | 2.9084E6           | 5        | 5                      | 288   | 318 |                                             |                                                          | PEAKS DB  |
| G.SEEEGDITNPINLREGPDLSNNFGK.L                     | Y    | 71.24  | 2873.3315 | 26     | 0.5  | 958.7869  | 3 | 32.19 | 11       | F11:1534 | OB5948 H3B Ro.raw | 1.9904E4           | 1        | 1                      | 388   | 413 |                                             |                                                          | PEAKS DB  |
| R.KSFNLDEGHALRIPSGFISYILNR.H                      | N    | 70.24  | 2746.4553 | 24     | 1.8  | 687.6223  | 4 | 39.03 | 8        | F8:1914  | OB5952 H3A Ro.raw | 3.7974E5           | 2        | 2                      | 254   | 277 |                                             |                                                          | PEAKS DB  |
| R.I(+57.02)FLAGDKDNVIDQIEK.Q                      | N    | 66.79  | 1873.9785 | 16     | -2.1 | 937.9969  | 2 | 33.39 | 10       | F10:1458 | OB5926 H3B Ro.raw | 2.2898E4           | 1        | 1                      | 541   | 556 | Carbamidomethylation (DHKE, X@N-term):56.99 | I1:Carbamidomethylation (D HKE, X@N-term):56.99          | PEAKS PTM |
| K.HADADNIIQQGQATVTVANGNNR.K                       | N    | 65.50  | 2618.3162 | 25     | 0.5  | 873.7798  | 3 | 30.34 | 7        | F7:1426  | OB5951 H3A Ro.raw | 1.8654E3           | 1        | 1                      | 229   | 253 |                                             |                                                          | PEAKS DB  |
| K.KGSEEEGDITNPINLREGPDLSNNFGK.L                   | Y    | 62.77  | 3058.4478 | 28     | 4.3  | 1020.4943 | 3 | 31.17 | 9        | F9:1469  | OB5953 H3A Ro.raw | 8.012E4            | 3        | 3                      | 386   | 413 |                                             |                                                          | PEAKS DB  |
| K.HADADNIIQQGQATVTVANGNNR.K.S                     | N    | 62.55  | 2746.4111 | 26     | 0.2  | 916.4778  | 3 | 29.66 | 7        | F7:1385  | OB5951 H3A Ro.raw | 6.7701E4           | 2        | 2                      | 229   | 254 |                                             |                                                          | PEAKS DB  |
| K.ISM(+15.99)PVNTPGQFEDFFPASSRDQSSYLQGFSR.N       | N    | 62.16  | 3510.6150 | 31     | -1.8 | 1171.2126 | 3 | 35.35 | 11       | F11:1707 | OB5948 H3B Ro.raw | 2.4799E6           | 5        | 5                      | 288   | 318 | Oxidation (M)                               | M3:Oxidation (M):1000.00                                 | PEAKS DB  |
| R.EETSRNPFYFPSRR.F                                | N    | 62.14  | 1898.9023 | 15     | -0.7 | 633.9758  | 3 | 30.73 | 10       | F10:1288 | OB5926 H3B Ro.raw | 1.7594E4           | 1        | 1                      | 167   | 181 |                                             |                                                          | PEAKS DB  |
| K.GSEEEGDITN(+.98)PINLREGPDLSNNFGK.L              | Y    | 61.63  | 2931.3369 | 27     | 9.2  | 978.1306  | 3 | 32.21 | 11       | F11:1532 | OB5948 H3B Ro.raw | 9.2634E3           | 1        | 1                      | 387   | 413 |                                             | N10:Deamidation (NQ):25.20                               | PEAKS DB  |
| K.NPQLQDLDMMLTC(+57.02)VEIKEGALMLPHFNSK.A         | N    | 59.27  | 3371.6387 | 29     | -0.3 | 843.9188  | 4 | 39.49 | 10       | F10:1807 | OB5926 H3B Ro.raw | 8.6484E5           | 3        | 3                      | 423   | 451 | Carbamidomethylation                        | C13:Carbamidomethylation:1000.00                         | PEAKS DB  |
| K.NPQLQDLDMMLTC(+57.02)VEIKEGALM(+15.99)LPHFNSK.A | N    | 58.64  | 3387.6335 | 29     | 1.2  | 847.9185  | 4 | 38.07 | 11       | F11:1874 | OB5948 H3B Ro.raw | 3.9631E5           | 2        | 2                      | 423   | 451 | Carbamidomethylation; Oxidation (M)         | C13:Carbamidomethylation:1000.00;M22:Oxidation (M):51.99 | PEAKS DB  |
| K.NPQLQDLDM(+15.99)MLTC(+57.02)VEIK.E             | N    | 57.29  | 2062.9736 | 17     | 2.8  | 1032.4969 | 2 | 36.63 | 9        | F9:1780  | OB5953 H3A Ro.raw | 0                  | 0        | 0                      | 423   | 439 | Carbamidomethylation                        | M9:Oxidation (M):24.44;C13:Carbamidomethylation:1000.00  | PEAKS DB  |

total 66 peptides

| Peptide                                                           | Uniq | -10lgP | Mass      | Length | ppm  | m/z      | z | RT    | Fraction | Scan     | Source File       | Area Roast Ara h 3 | #Feature | #Feature Roast Ara h 3 | Start | End | PTM                                   | AScore                                                                                                        | Found By  |
|-------------------------------------------------------------------|------|--------|-----------|--------|------|----------|---|-------|----------|----------|-------------------|--------------------|----------|------------------------|-------|-----|---------------------------------------|---------------------------------------------------------------------------------------------------------------|-----------|
| R.NTLEAAFN(+.98)AEFNEIRR.V                                        | N    | 56.23  | 1894.9172 | 16     | 0.4  | 948.4663 | 2 | 32.13 | 9        | F9:1524  | OB5953 H3A Ro.raw | 1.3345E4           | 2        | 2                      | 319   | 334 |                                       | N8:Deamidation (NQ):20.76                                                                                     | PEAKS DB  |
| R.SSENNEGVIVKVSKEHVEELTK.H                                        | Y    | 54.00  | 2454.2603 | 22     | 1.5  | 819.0952 | 3 | 30.81 | 8        | F8:1445  | OB5952 H3A Ro.raw | 1.1749E4           | 1        | 1                      | 357   | 378 |                                       |                                                                                                               | PEAKS DB  |
| R.VLLEENAGGEQEERGQR.R                                             | N    | 52.47  | 1912.9238 | 17     | -2.1 | 638.6472 | 3 | 28.03 | 8        | F8:1297  | OB5952 H3A Ro.raw | 8.2166E3           | 2        | 2                      | 335   | 351 |                                       |                                                                                                               | PEAKS DB  |
| R.NTLEAAFNAEFN(+.98)EIRR.V                                        | N    | 50.81  | 1894.9172 | 16     | 1.9  | 948.4677 | 2 | 32.67 | 7        | F7:1563  | OB5951 H3A Ro.raw | 9.2576E4           | 2        | 2                      | 319   | 334 |                                       | N12:Deamidation (NQ):8.26                                                                                     | PEAKS DB  |
| K.HADADNLIQQGQATVTVANGN(+.98)NRK.S                                | N    | 50.48  | 2747.3950 | 26     | -4.1 | 916.8038 | 3 | 30.36 | 11       | F11:1426 | OB5948 H3B Ro.raw | 0                  | 0        | 0                      | 229   | 254 |                                       | N23:Deamidation (NQ):9.40                                                                                     | PEAKS DB  |
| K.S(+57.02)FNLDEGHALRIPSGFISYILNR.H                               | N    | 49.55  | 2675.3818 | 23     | 2.3  | 892.8033 | 3 | 39.35 | 7        | F7:1901  | OB5951 H3A Ro.raw | 6.7035E5           | 1        | 1                      | 255   | 277 | Carbamidomethylation (DHKE, X@N-term) | S1:Carbamidomethylation (D HKE, X@N-term):63.97                                                               | PEAKS PTM |
| R.IFLAGD(+57.02)KDNVIDQIEK.Q                                      | N    | 45.63  | 1873.9785 | 16     | 1.4  | 937.9978 | 2 | 33.53 | 12       | F12:1622 | OB5949 H3B Ro.raw | 3.5356E3           | 1        | 1                      | 541   | 556 |                                       | D6:Carbamidomethylation (D HKE, X@N-term):15.57                                                               | PEAKS PTM |
| K.HADADNLIQQGQ(+.98)ATVTVANGNNRK.S                                | N    | 45.21  | 2747.3950 | 26     | 2.6  | 916.8103 | 3 | 30.46 | 10       | F10:1280 | OB5926 H3B Ro.raw | 0                  | 0        | 0                      | 229   | 254 |                                       | Q14:Deamidation (NQ):0.00                                                                                     | PEAKS DB  |
| K.AM(+15.99)VIVVVNKG TGNLELVAVRK.E                                | N    | 45.01  | 2225.2930 | 21     | -1.5 | 742.7723 | 3 | 33.77 | 10       | F10:1559 | OB5926 H3B Ro.raw | 4.0307E5           | 2        | 2                      | 452   | 472 | Oxidation (M)                         | M2:Oxidation (M):1000.00                                                                                      | PEAKS DB  |
| R.VAKISM(+15.99)PVNTPGQFEDFFPASSR.D                               | N    | 44.60  | 2540.2368 | 23     | 3.4  | 847.7558 | 3 | 33.41 | 8        | F8:1598  | OB5952 H3A Ro.raw | 0                  | 0        | 0                      | 285   | 307 | Oxidation (M)                         | M6:Oxidation (M):1000.00                                                                                      | PEAKS DB  |
| K.AMVIVVNK.G                                                      | N    | 42.66  | 971.5837  | 9      | -3.0 | 486.7977 | 2 | 29.40 | 7        | F7:1370  | OB5951 H3A Ro.raw | 0                  | 0        | 0                      | 452   | 460 |                                       |                                                                                                               | PEAKS DB  |
| R.N(+.98)TLEAAFNAEFNEIRR.V                                        | N    | 42.24  | 1894.9172 | 16     | 3.2  | 948.4689 | 2 | 33.46 | 8        | F8:1601  | OB5952 H3A Ro.raw | 5.9553E4           | 1        | 1                      | 319   | 334 |                                       | N1:Deamidation (NQ):34.75                                                                                     | PEAKS DB  |
| R.I(+57.02)VQIEAKPNTLVLPK.H                                       | Y    | 39.31  | 1719.0294 | 15     | 0.6  | 860.5225 | 2 | 30.81 | 8        | F8:1447  | OB5952 H3A Ro.raw | 7.5816E3           | 1        | 1                      | 214   | 228 |                                       | I1:Carbamidomethylation (D HKE, X@N-term):28.70                                                               | PEAKS PTM |
| K.NPQLQDLDM(+15.99)M(+15.99)LTC(+57.02)VEIKEGALM(+15.99)LPHFNSK.A | N    | 39.18  | 3419.6233 | 29     | 1.7  | 855.9146 | 4 | 35.97 | 8        | F8:1751  | OB5952 H3A Ro.raw | 6.0894E4           | 1        | 1                      | 423   | 451 | Oxidation (M); Carbamidomethylation   | M9:Oxidation (M):1000.00;M10:Oxidation (M):1000.00;C13:Carbamidomethylation:1000.00;M22:Oxidation (M):1000.00 | PEAKS DB  |
| K.KGSEEEGDITNPINLREGEPLSN(+.98)NFGK.L                             | Y    | 39.05  | 3059.4319 | 28     | 0.6  | 765.8674 | 4 | 31.36 | 11       | F11:1485 | OB5948 H3B Ro.raw | 0                  | 0        | 0                      | 386   | 413 |                                       | N24:Deamidation (NQ):0.00                                                                                     | PEAKS DB  |
| K.GTGNLELVAVRK.E                                                  | N    | 37.48  | 1255.7249 | 12     | -1.1 | 628.8690 | 2 | 28.81 | 8        | F8:1332  | OB5952 H3A Ro.raw | 1.1804E3           | 2        | 2                      | 461   | 472 |                                       |                                                                                                               | PEAKS DB  |
| K.NPQLQDLDM(+15.99)LTC(+57.02)VEIKEGALM(+15.99)LPHFNSK.A          | N    | 36.15  | 3403.6284 | 29     | 4.5  | 851.9182 | 4 | 36.31 | 7        | F7:1742  | OB5951 H3A Ro.raw | 1.3711E5           | 1        | 1                      | 423   | 451 | Carbamidomethylation                  | M10:Oxidation (M):0.00;C13:Carbamidomethylation:1000.00;M22:Oxidation (M):40.85                               | PEAKS DB  |

total 66 peptides



| Peptide                                                   | Uniq | -10lgP | Mass      | Length | ppm  | m/z      | z | RT    | Fraction | Scan     | Source File       | Area Roast Ara h 3 | #Feature | #Feature Roast Ara h 3 | Start | End | PTM                  | AScore                                                                          | Found By  |
|-----------------------------------------------------------|------|--------|-----------|--------|------|----------|---|-------|----------|----------|-------------------|--------------------|----------|------------------------|-------|-----|----------------------|---------------------------------------------------------------------------------|-----------|
| G.SEEEGDITNPIN(+.98)LREGEPDLSNNFGK.L                      | Y    | 35.57  | 2874.3154 | 26     | 4.6  | 959.1188 | 3 | 32.12 | 11       | F11:1534 | OB5948 H3B Ro.raw | 1.1098E4           | 1        | 1                      | 388   | 413 |                      | N12:Deamidation (NQ):0.00                                                       | PEAKS DB  |
| R.IPSGFISYILN(+.98)RHDNQNL.R.V                            | N    | 35.18  | 2257.1604 | 19     | 6.7  | 753.4007 | 3 | 36.32 | 11       | F11:1765 | OB5948 H3B Ro.raw | 5.0814E4           | 1        | 1                      | 266   | 284 |                      | N11:Deamidation (NQ):11.12                                                      | PEAKS DB  |
| K.SFNLDEGHALRIPSGFISYILNRHDNQN(+.98)LR.V                  | N    | 34.85  | 3496.7600 | 30     | 4.9  | 700.3627 | 5 | 37.51 | 8        | F8:1925  | OB5952 H3A Ro.raw | 2.7478E5           | 1        | 1                      | 255   | 284 |                      | N28:Deamidation (NQ):10.11                                                      | PEAKS DB  |
| K.NPQLQDLDM(+15.99)MLTC(+57.02)VEIKEGALMLPHFNSK.A         | N    | 34.78  | 3387.6335 | 29     | 4.0  | 847.9191 | 4 | 38.06 | 9        | F9:1825  | OB5953 H3A Ro.raw | 2.0615E5           | 1        | 1                      | 423   | 451 | Carbamidomethylation | M9:Oxidation (M):0.00;C13:Carbamidomethylation:1000.00                          | PEAKS DB  |
| K.NPQLQDLDM(+15.99)MLTC(+57.02)VEIKEGALM(+15.99)LPHFNSK.A | N    | 34.77  | 3403.6284 | 29     | 0.8  | 851.9150 | 4 | 37.70 | 8        | F8:1849  | OB5952 H3A Ro.raw | 1.9344E5           | 1        | 1                      | 423   | 451 | Carbamidomethylation | M9:Oxidation (M):24.44;C13:Carbamidomethylation:1000.00;M22:Oxidation (M):19.27 | PEAKS DB  |
| R.IVQ(+.98)IEAKPNTLVLPK.H                                 | Y    | 32.72  | 1662.9919 | 15     | 6.9  | 832.5090 | 2 | 31.77 | 12       | F12:1516 | OB5949 H3B Ro.raw | 0                  | 0        | 0                      | 214   | 228 |                      | Q3:Deamidation (NQ):22.09                                                       | PEAKS DB  |
| K.NPQLQDLDM(+15.99)M(+15.99)LTC(+57.02)VEIKEGALMLPHFNSK.A | N    | 32.60  | 3403.6284 | 29     | 1.4  | 851.9156 | 4 | 37.49 | 9        | F9:1800  | OB5953 H3A Ro.raw | 2.8417E5           | 1        | 1                      | 423   | 451 | Carbamidomethylation | M9:Oxidation (M):0.00;M10:Oxidation (M):0.00;C13:Carbamidomethylation:1000.00   | PEAKS DB  |
| K.KGSEEEDITNPINLREGEPLDLSNN(+.98)FGK.L                    | Y    | 32.29  | 3059.4319 | 28     | 8.8  | 765.8720 | 4 | 31.05 | 7        | F7:1466  | OB5951 H3A Ro.raw | 0                  | 0        | 0                      | 386   | 413 |                      | N25:Deamidation (NQ):0.00                                                       | PEAKS DB  |
| R.Q(-17.03)FQNLQNHR.I                                     | N    | 31.50  | 1166.5581 | 9      | -0.6 | 584.2859 | 2 | 28.13 | 7        | F7:1303  | OB5951 H3A Ro.raw | 4.0835E2           | 1        | 1                      | 205   | 213 | Pyro-glu from Q      | Q1:Pyro-glu from Q:1000.00                                                      | PEAKS PTM |
| total 66 peptides                                         |      |        |           |        |      |          |   |       |          |          |                   |                    |          |                        |       |     |                      |                                                                                 |           |

A1DZF0|A1DZF0\_ARAHY

[back to list](#)

| [Protein Coverage](#) | [Supporting Peptides](#) |

Protein Coverage:



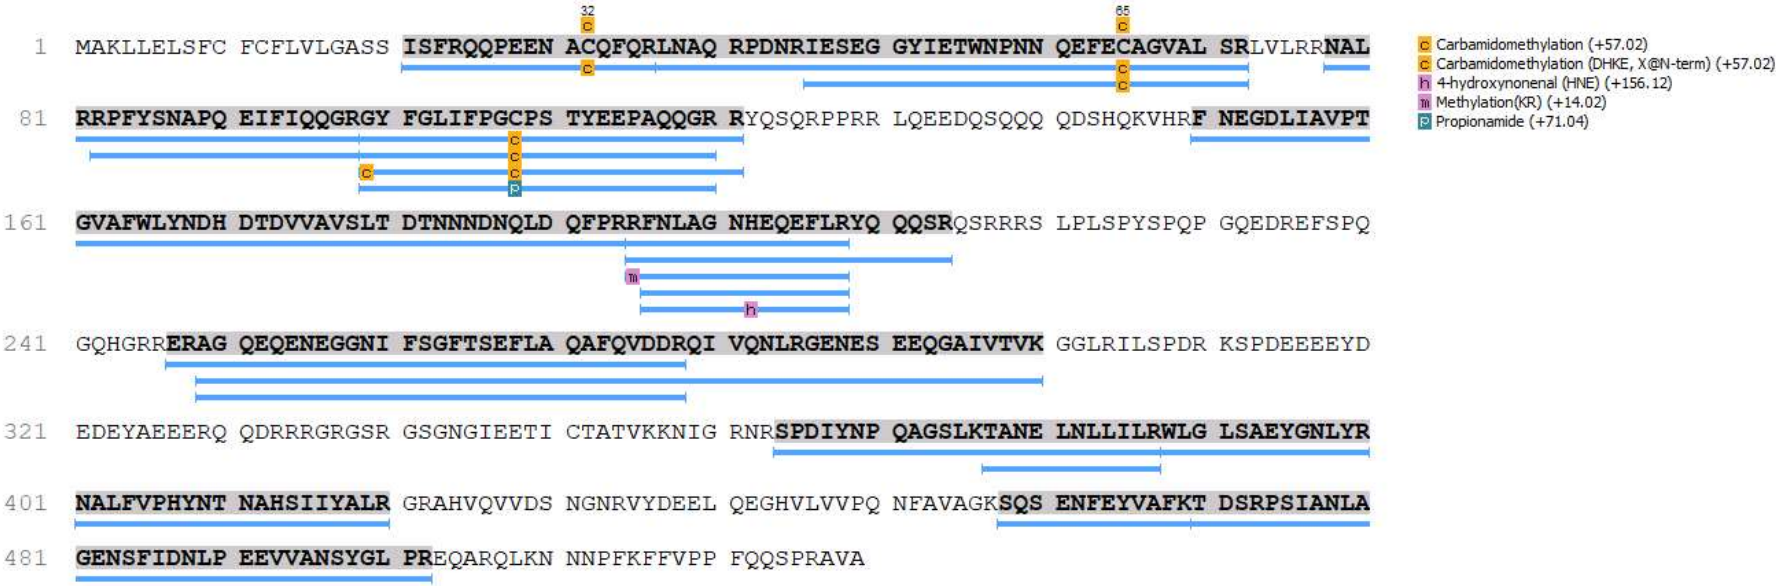

Supporting Peptides:

| Peptide                                | Uniq | -10lgP | Mass      | Length | ppm  | m/z       | z | RT    | Fraction | Scan     | Source File       | Area Roast Ara h 3 | #Feature | #Feature Roast Ara h 3 | Start | End | PTM                  | AScore                            | Found By |
|----------------------------------------|------|--------|-----------|--------|------|-----------|---|-------|----------|----------|-------------------|--------------------|----------|------------------------|-------|-----|----------------------|-----------------------------------|----------|
| R.GYFGLIFPGC(+57.02)PSTYEPAQQGR.R      | N    | 200.00 | 2473.1372 | 22     | 3.0  | 1237.5796 | 2 | 36.11 | 7        | F7:1750  | OB5951 H3A Ro.raw | 1.587E6            | 6        | 6                      | 99    | 120 | Carbamidomethylation | C10:Carbamidomethylation: 1000,00 | PEAKS DB |
| R.WLGLSAEYGNLYR.N                      | N    | 163.36 | 1540.7673 | 13     | -0.8 | 771.3920  | 2 | 34.97 | 11       | F11:1697 | OB5948 H3B Ro.raw | 6.3564E5           | 6        | 6                      | 388   | 400 |                      |                                   | PEAKS DB |
| R.RPFYSNAPQEIFIQQGR.G                  | N    | 137.88 | 2050.0383 | 17     | 3.2  | 684.3556  | 3 | 31.52 | 7        | F7:1483  | OB5951 H3A Ro.raw | 5.9353E6           | 9        | 9                      | 82    | 98  |                      |                                   | PEAKS DB |
| K.TDSRPSIANLAGENSFIDNLP EEVVANSYGLPR.E | N    | 129.79 | 3544.7434 | 33     | 0.8  | 1182.5919 | 3 | 37.65 | 11       | F11:1851 | OB5948 H3B Ro.raw | 2.2816E6           | 5        | 5                      | 470   | 502 |                      |                                   | PEAKS DB |
| R.NALRRPFYSNAPQEIFIQQGR.G              | N    | 125.40 | 2504.3037 | 21     | 1.0  | 835.7760  | 3 | 32.71 | 9        | F9:1535  | OB5953 H3A Ro.raw | 6.1298E6           | 10       | 10                     | 78    | 98  |                      |                                   | PEAKS DB |
| R.FNLAGNHEQEFLR.Y                      | N    | 104.44 | 1573.7637 | 13     | 4.3  | 787.8925  | 2 | 30.57 | 7        | F7:1440  | OB5951 H3A Ro.raw | 1.243E5            | 7        | 7                      | 196   | 208 |                      |                                   | PEAKS DB |
| K.SQSENFEYVAFK.T                       | N    | 103.88 | 1447.6619 | 12     | 2.4  | 724.8400  | 2 | 31.14 | 7        | F7:1469  | OB5951 H3A Ro.raw | 3.2277E4           | 3        | 3                      | 458   | 469 |                      |                                   | PEAKS DB |
| R.RFNLAGNHEQEFLR.Y                     | N    | 99.39  | 1729.8647 | 14     | 1.5  | 577.6297  | 3 | 31.36 | 9        | F9:1478  | OB5953 H3A Ro.raw | 1.8255E6           | 6        | 6                      | 195   | 208 |                      |                                   | PEAKS DB |
| R.GYFGLIFPGC(+57.02)PSTYEPAQQGR.Y      | N    | 99.33  | 2629.2383 | 23     | 2.4  | 877.4221  | 3 | 35.18 | 9        | F9:1676  | OB5953 H3A Ro.raw | 4.5018E6           | 7        | 7                      | 99    | 121 | Carbamidomethylation | C10:Carbamidomethylation: 1000,00 | PEAKS DB |
| K.TANELNLLILR.W                        | N    | 92.46  | 1268.7452 | 11     | -0.4 | 635.3796  | 2 | 34.99 | 9        | F9:1688  | OB5953 H3A Ro.raw | 2.3728E5           | 3        | 3                      | 377   | 387 |                      |                                   | PEAKS DB |
| R.AGQEENEGGNIFSGFTSEFLAQAFQVDDR.Q      | Y    | 86.95  | 3290.4751 | 30     | 3.2  | 1646.2535 | 2 | 40.50 | 11       | F11:2017 | OB5948 H3B Ro.raw | 5.1868E4           | 1        | 1                      | 249   | 278 |                      |                                   | PEAKS DB |
| total 30 peptides                      |      |        |           |        |      |           |   |       |          |          |                   |                    |          |                        |       |     |                      |                                   |          |

| Peptide                                                      | Uniq | -10lgP | Mass      | Length | ppm  | m/z       | z | RT    | Fraction | Scan     | Source File       | Area Roast Ara h 3 | #Feature | #Feature Roast Ara h 3 | Start | End | PTM                                                         | AScore                                                                           | Found By  |
|--------------------------------------------------------------|------|--------|-----------|--------|------|-----------|---|-------|----------|----------|-------------------|--------------------|----------|------------------------|-------|-----|-------------------------------------------------------------|----------------------------------------------------------------------------------|-----------|
| R.GYGLIFPGC(+71.04)PSTYEPAQQGR.R                             | N    | 72.57  | 2487.1528 | 22     | 2.6  | 1244.5869 | 2 | 36.34 | 9        | F9:1767  | OB5953 H3A Ro.raw | 2.3282E4           | 2        | 2                      | 99    | 120 | Propionamide                                                | C10:Propionamide:1000.00                                                         | PEAKS PTM |
| R.FNEGDIAVPTGVAFWLYNDHDTDVAVSLDTNNNDNQDQFPR.R                | N    | 69.73  | 5049.3691 | 45     | 0.7  | 1684.1357 | 3 | 40.24 | 10       | F10:1843 | OB5926 H3B Ro.raw | 1.1398E6           | 2        | 2                      | 150   | 194 |                                                             |                                                                                  | PEAKS DB  |
| R.SPDIYNPQAGSLKTANELNLLILR.W                                 | N    | 66.95  | 2639.4282 | 24     | 2.2  | 880.8186  | 3 | 36.15 | 9        | F9:1756  | OB5953 H3A Ro.raw | 1.5334E5           | 4        | 4                      | 364   | 387 |                                                             |                                                                                  | PEAKS DB  |
| R.IESEGGYIETWNPNNQEFEC(+57.02)AGVALSR.L                      | N    | 66.94  | 3069.3774 | 27     | 6.2  | 1535.7054 | 2 | 34.89 | 8        | F8:1684  | OB5952 H3A Ro.raw | 0                  | 0        | 0                      | 46    | 72  | Carbamidomethylation                                        | C20:Carbamidomethylation:1000.00                                                 | PEAKS DB  |
| R.RFNLAGNHEQEFLRYQQSR.Q                                      | N    | 66.29  | 2520.2371 | 20     | -2.2 | 631.0667  | 4 | 34.12 | 10       | F10:1496 | OB5926 H3B Ro.raw | 7.5688E4           | 2        | 2                      | 195   | 214 |                                                             |                                                                                  | PEAKS DB  |
| R.NALFVPHYNTNAHSIIYALR.G                                     | N    | 63.14  | 2313.2019 | 20     | 0.2  | 772.0747  | 3 | 35.15 | 7        | F7:1685  | OB5951 H3A Ro.raw | 9.0952E5           | 5        | 5                      | 401   | 420 |                                                             |                                                                                  | PEAKS DB  |
| S.ISFRQQPEENAC(+57.02)QFQR.L                                 | N    | 45.61  | 2036.9486 | 16     | -1.4 | 679.9907  | 3 | 28.84 | 11       | F11:1329 | OB5948 H3B Ro.raw | 4.7949E4           | 5        | 5                      | 21    | 36  | Carbamidomethylation                                        | C12:Carbamidomethylation:1000.00                                                 | PEAKS DB  |
| R.AGQEQENEGGNIFSGTSEFLAQAFQVDDRQIVQNLRGENESEEQGAIVTK.G       | Y    | 44.21  | 5712.7202 | 52     | 4.9  | 1429.1943 | 4 | 39.90 | 12       | F12:1989 | OB5949 H3B Ro.raw | 4.1738E6           | 1        | 1                      | 249   | 300 |                                                             |                                                                                  | PEAKS DB  |
| R.ERAGQEQENEGGNIFSGTSEFLAQAFQVDDR.Q                          | Y    | 44.17  | 3575.6189 | 32     | -0.4 | 1192.8823 | 3 | 39.35 | 11       | F11:1955 | OB5948 H3B Ro.raw | 5.3613E4           | 1        | 1                      | 247   | 278 |                                                             |                                                                                  | PEAKS DB  |
| R.RFNLAGNH(+14.02)EQEFLR.Y                                   | N    | 41.89  | 1743.8805 | 14     | 0.5  | 582.3011  | 3 | 31.14 | 7        | F7:1453  | OB5951 H3A Ro.raw | 4.477E5            | 2        | 2                      | 195   | 208 |                                                             | H8:Methylation(others):40.00                                                     | PEAKS PTM |
| R.G(+57.02)YFGLIFPGC(+57.02)PSTYEPAQQGRR.Y                   | N    | 35.90  | 2686.2598 | 23     | 1.6  | 896.4286  | 3 | 35.57 | 8        | F8:1718  | OB5952 H3A Ro.raw | 5.4933E4           | 1        | 1                      | 99    | 121 | Carbamidomethylation (DHKE, X@N-term); Carbamidomethylation | G1:Carbamidomethylation (DHKE, X@N-term):130.55;C10:Carbamidomethylation:1000.00 | PEAKS PTM |
| R.LNAQRPDNRIESEGGYIETWNPNNQEFEC(+57.02)AGVALSR.L             | N    | 35.63  | 4133.9248 | 36     | 4.2  | 1034.4928 | 4 | 36.08 | 8        | F8:1752  | OB5952 H3A Ro.raw | 1.6394E5           | 1        | 1                      | 37    | 72  | Carbamidomethylation                                        | C29:Carbamidomethylation:1000.00                                                 | PEAKS DB  |
| R.RPFYSNAP(+15.99)QEIFIQQGR.G                                | N    | 34.29  | 2066.0332 | 17     | 0.2  | 689.6852  | 3 | 31.94 | 9        | F9:1497  | OB5953 H3A Ro.raw | 4.3282E4           | 1        | 1                      | 82    | 98  |                                                             | P8:Oxidation or Hydroxylation:32.28                                              | PEAKS PTM |
| R.R(+14.02)FNLAGNHEQEFLR.Y                                   | N    | 32.14  | 1743.8805 | 14     | 0.9  | 582.3013  | 3 | 31.38 | 8        | F8:1472  | OB5952 H3A Ro.raw | 2.9356E5           | 2        | 2                      | 195   | 208 | Methylation(KR)                                             | R1:Methylation(KR):67.58                                                         | PEAKS PTM |
| R.RFNLAGNHEQ(+.98)EFLRYQQSR.Q                                | N    | 31.27  | 2521.2209 | 20     | 5.0  | 631.3173  | 4 | 34.33 | 10       | F10:1528 | OB5926 H3B Ro.raw | 4.7768E4           | 1        | 1                      | 195   | 214 |                                                             | Q10:Deamidation (NQ):0.00                                                        | PEAKS DB  |
| R.FNLAGNH(+14.02)EQEFLR.Y                                    | N    | 31.24  | 1587.7793 | 13     | 0.7  | 530.2674  | 3 | 30.81 | 8        | F8:1450  | OB5952 H3A Ro.raw | 6.1216E4           | 1        | 1                      | 196   | 208 |                                                             | H7:Methylation(others):14.02                                                     | PEAKS PTM |
| R.FNLAGNH(+156.12)EQEFLR.Y                                   | N    | 31.09  | 1729.8788 | 13     | -7.6 | 577.6292  | 3 | 31.13 | 7        | F7:1444  | OB5951 H3A Ro.raw | 2.4781E5           | 1        | 1                      | 196   | 208 | 4-hydroxynonenal (HNE)                                      | H7:4-hydroxynonenal (HNE):1000.00                                                | PEAKS PTM |
| R.RFN(+.98)LAGNHEQEFLR.Y                                     | N    | 30.90  | 1730.8488 | 14     | 9.2  | 577.9634  | 3 | 32.85 | 11       | F11:1572 | OB5948 H3B Ro.raw | 0                  | 0        | 0                      | 195   | 208 |                                                             | N3:Deamidation (NQ):17.65                                                        | PEAKS DB  |
| R.AGQEQEN(+.98)EGGNIFSGTSEFLAQAFQVDDRQIVQNLRGENESEEQGAIVTK.G | Y    | 30.03  | 5713.7041 | 52     | 7.4  | 1143.7566 | 5 | 39.90 | 12       | F12:2004 | OB5949 H3B Ro.raw | 1.9949E5           | 1        | 1                      | 249   | 300 |                                                             | N7:Deamidation (NQ):8.26                                                         | PEAKS DB  |
| total 30 peptides                                            |      |        |           |        |      |           |   |       |          |          |                   |                    |          |                        |       |     |                                                             |                                                                                  |           |

Q38711|Q38711\_ARAHY

[back to list](#)

| [Protein Coverage](#) | [Supporting Peptides](#) |

Protein Coverage:

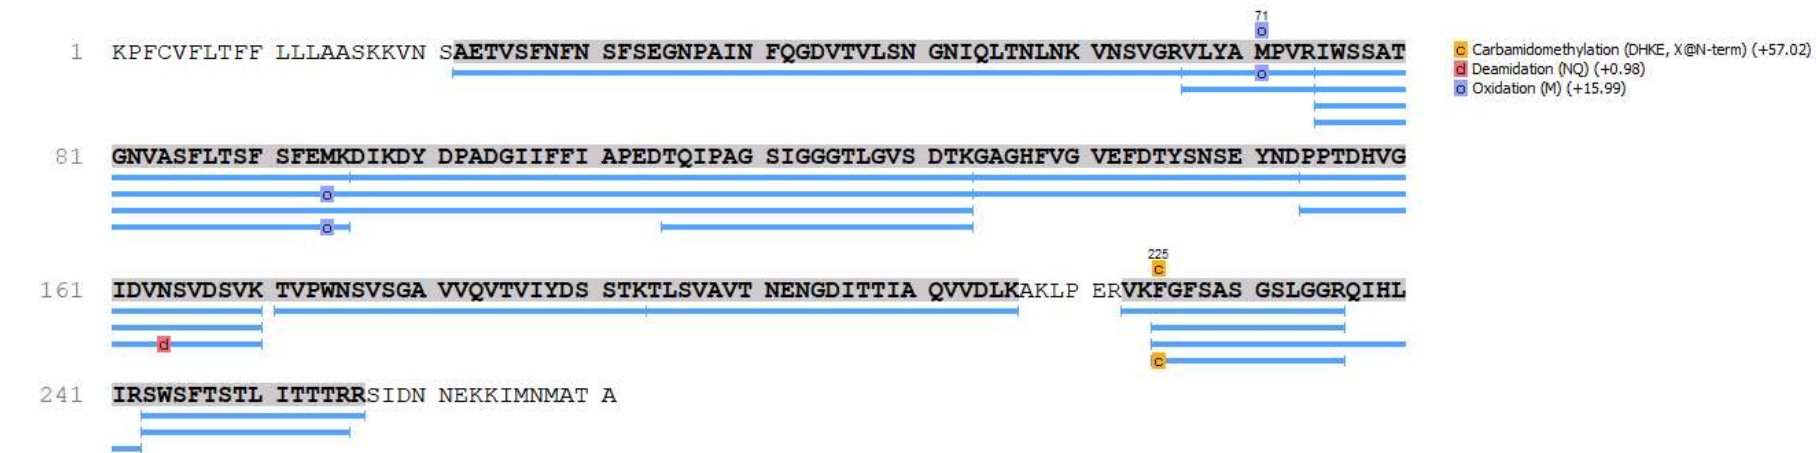

Supporting Peptides:

| Peptide                                    | Uniq | -10lgP | Mass      | Length | ppm  | m/z       | z | RT    | Fraction | Scan     | Source File       | Area Roast Ara h 3 | #Feature | #Feature Roast Ara h 3 | Start | End | PTM           | AScore                     | Found By |
|--------------------------------------------|------|--------|-----------|--------|------|-----------|---|-------|----------|----------|-------------------|--------------------|----------|------------------------|-------|-----|---------------|----------------------------|----------|
| R.SWSFTSTLITTTTR,R                         | N    | 200.00 | 1499.7620 | 13     | -1.1 | 750.8890  | 2 | 34.40 | 11       | F11:1663 | OB5948 H3B Ro.raw | 1.0426E6           | 6        | 6                      | 243   | 255 |               |                            | PEAKS DB |
| R.IWSSATGNVASFLTSFSFEMK,D                  | N    | 200.00 | 2309.1038 | 21     | -0.7 | 1155.5608 | 2 | 39.93 | 11       | F11:1986 | OB5948 H3B Ro.raw | 5.3682E5           | 3        | 3                      | 75    | 95  |               |                            | PEAKS DB |
| K.TLSVAVTNENGDIITIAQVVDLK,A                | Y    | 130.69 | 2400.2747 | 23     | -0.3 | 1201.1469 | 2 | 35.93 | 11       | F11:1752 | OB5948 H3B Ro.raw | 2.3058E5           | 4        | 4                      | 194   | 216 |               |                            | PEAKS DB |
| K.DIKDYDPADGIIFFIAPEDTQIPAGSIGGGTLGVSDTK,G | N    | 120.14 | 3892.9258 | 38     | 0.9  | 1298.6531 | 3 | 38.97 | 11       | F11:1923 | OB5948 H3B Ro.raw | 1.1326E6           | 3        | 3                      | 96    | 133 |               |                            | PEAKS DB |
| R.IWSSATGNVASFLTSFSFEM(+15.99)K,D          | N    | 119.39 | 2325.0986 | 21     | -0.6 | 1163.5583 | 2 | 38.94 | 11       | F11:1921 | OB5948 H3B Ro.raw | 4.3252E4           | 1        | 1                      | 75    | 95  | Oxidation (M) | M20:Oxidation (M):10 00,00 | PEAKS DB |
| D.PPTDHVGIDVNSVDSVK,T                      | N    | 115.65 | 1777.8846 | 17     | -1.1 | 593.6361  | 3 | 29.68 | 11       | F11:1382 | OB5948 H3B Ro.raw | 1.08E6             | 10       | 10                     | 154   | 170 |               |                            | PEAKS DB |
| K.TVPWNSVSGAVVQVTVIYDSSTK,T                | Y    | 111.07 | 2436.2537 | 23     | 0.2  | 1219.1370 | 2 | 37.45 | 11       | F11:1834 | OB5948 H3B Ro.raw | 1.092E5            | 3        | 3                      | 171   | 193 |               |                            | PEAKS DB |
| K.FGFSASGSLGGR,Q                           | N    | 103.60 | 1141.5515 | 12     | -1.3 | 571.7837  | 2 | 30.73 | 10       | F10:1279 | OB5926 H3B Ro.raw | 4.8005E5           | 3        | 3                      | 225   | 236 |               |                            | PEAKS DB |
| R.VLYAMPVR,I                               | N    | 103.56 | 947.5262  | 8      | -1.9 | 474.7705  | 2 | 29.80 | 11       | F11:1400 | OB5948 H3B Ro.raw | 5.0266E5           | 3        | 3                      | 67    | 74  |               |                            | PEAKS DB |
| K.GAGHFVGVEFDTYSNSEYND,P                   | N    | 102.79 | 2206.9080 | 20     | 0.5  | 1104.4641 | 2 | 32.88 | 11       | F11:1577 | OB5948 H3B Ro.raw | 3.4015E5           | 3        | 3                      | 134   | 153 |               |                            | PEAKS DB |
| R.VKFGFSASGSLGGR,Q                         | N    | 87.36  | 1368.7150 | 14     | -1.8 | 685.3650  | 2 | 30.41 | 11       | F11:1429 | OB5948 H3B Ro.raw | 2.1689E4           | 3        | 3                      | 223   | 236 |               |                            | PEAKS DB |

total 24 peptides

| Peptide                                                                 | Uniq | -10lgP | Mass      | Length | ppm  | m/z       | z | RT    | Fraction | Scan     | Source File       | Area Roast Ara h 3 | #Feature | #Feature Roast Ara h 3 | Start | End | PTM                                   | AScore                                            | Found By  |
|-------------------------------------------------------------------------|------|--------|-----------|--------|------|-----------|---|-------|----------|----------|-------------------|--------------------|----------|------------------------|-------|-----|---------------------------------------|---------------------------------------------------|-----------|
| K.GAGHFVGVEFDTYNSSEYNDPPTDHSVGDVNSVDSVK.T                               | N    | 79.48  | 3966.7820 | 37     | 1.1  | 992.7060  | 4 | 33.64 | 11       | F11:1609 | OB5948 H3B Ro.raw | 4.277E6            | 6        | 6                      | 134   | 170 |                                       |                                                   | PEAKS DB  |
| K.F(+57.02)GFSASGSLGGR.Q                                                | N    | 66.26  | 1198.5730 | 12     | 4.1  | 600.2977  | 2 | 30.99 | 10       | F10:1312 | OB5926 H3B Ro.raw | 0                  | 0        | 0                      | 225   | 236 | Carbamidomethylation (DHKE, X@N-term) | F1:Carbamido methylation (DHKE, X@N-term):1000.00 | PEAKS PTM |
| R.SWSFTSTLITTRR.S                                                       | N    | 62.89  | 1655.8632 | 14     | -1.8 | 828.9391  | 2 | 33.07 | 11       | F11:1575 | OB5948 H3B Ro.raw | 1.4683E6           | 5        | 5                      | 243   | 256 |                                       |                                                   | PEAKS DB  |
| R.IWSSATGNVASFLTSFSFEM(+15.99)KDIKDYDPADGIIFFIAPEDTQIPAGSIGGGTLGVSDTK.G | N    | 52.25  | 6200.0137 | 59     | 1.2  | 1551.0165 | 4 | 41.20 | 10       | F10:1895 | OB5926 H3B Ro.raw | 7.8846E5           | 1        | 1                      | 75    | 133 | Oxidation (M)                         | M20:Oxidation (M):1000.00                         | PEAKS DB  |
| R.VLYAM(+15.99)PVR.I                                                    | N    | 51.60  | 963.5212  | 8      | -1.9 | 482.7680  | 2 | 27.02 | 11       | F11:1243 | OB5948 H3B Ro.raw | 1.3575E4           | 3        | 3                      | 67    | 74  | Oxidation (M)                         | M5:Oxidation (M):1000.00                          | PEAKS DB  |
| K.FGFSASGSLGGRQIHLIR.S                                                  | N    | 51.02  | 1902.0223 | 18     | -1.6 | 635.0153  | 3 | 35.47 | 10       | F10:1558 | OB5926 H3B Ro.raw | 1.7216E5           | 2        | 2                      | 225   | 242 |                                       |                                                   | PEAKS DB  |
| S.AETVSFNFSFSEGNPAINFQGDVTVLSNGNIQLTNLKNVNSVGR.V                        | N    | 49.99  | 4812.3740 | 45     | 4.5  | 1605.1392 | 3 | 40.87 | 12       | F12:2044 | OB5949 H3B Ro.raw | 5.6245E6           | 3        | 3                      | 22    | 66  |                                       |                                                   | PEAKS DB  |
| R.SW(+31.99)SFTSTLITTRR.R                                               | N    | 46.85  | 1531.7518 | 13     | -1.2 | 766.8839  | 2 | 33.45 | 11       | F11:1617 | OB5948 H3B Ro.raw | 3.3337E3           | 1        | 1                      | 243   | 255 |                                       | W2:Dihydroxy:17.01                                | PEAKS PTM |
| D.PPTDHSVGDVN(+.98)SVDSVK.T                                             | N    | 45.57  | 1778.8687 | 17     | 2.6  | 593.9665  | 3 | 29.71 | 10       | F10:1235 | OB5926 H3B Ro.raw | 0                  | 0        | 0                      | 154   | 170 | Deamidation (NQ)                      | N11:Deamidation (NQ):1000.00                      | PEAKS DB  |
| R.IWSSATGNVASFLTSFSFEMKDIKDYDPADGIIFFIAPEDTQIPAGSIGGGTLGVSDTK.G         | N    | 40.18  | 6184.0190 | 59     | 0.9  | 1547.0173 | 4 | 42.35 | 10       | F10:1960 | OB5926 H3B Ro.raw | 8.2055E5           | 1        | 1                      | 75    | 133 |                                       |                                                   | PEAKS DB  |
| S.AETVSFNFSFSEGNPAINFQGDVTVLSNGNIQLTNLN(+.98)KVNSVGR.V                  | N    | 33.54  | 4813.3584 | 45     | 8.6  | 1204.3572 | 4 | 38.44 | 12       | F12:1904 | OB5949 H3B Ro.raw | 0                  | 0        | 0                      | 22    | 66  |                                       | N38:Deamidation (NQ):0.00                         | PEAKS DB  |
| D.TQIPAGSIGGGTLGVSDTK.G                                                 | N    | 31.05  | 1757.9159 | 19     | 0.6  | 879.9658  | 2 | 30.69 | 12       | F12:1451 | OB5949 H3B Ro.raw | 0                  | 0        | 0                      | 115   | 133 |                                       |                                                   | PEAKS DB  |
| K.GAGHFVGVEFDTYNSSEYN(+.98)D.P                                          | N    | 29.27  | 2207.8918 | 20     | 8.6  | 1104.9626 | 2 | 34.00 | 12       | F12:1651 | OB5949 H3B Ro.raw | 2.0669E4           | 1        | 1                      | 134   | 153 |                                       | N19:Deamidation (NQ):0.00                         | PEAKS DB  |
| total 24 peptides                                                       |      |        |           |        |      |           |   |       |          |          |                   |                    |          |                        |       |     |                                       |                                                   |           |

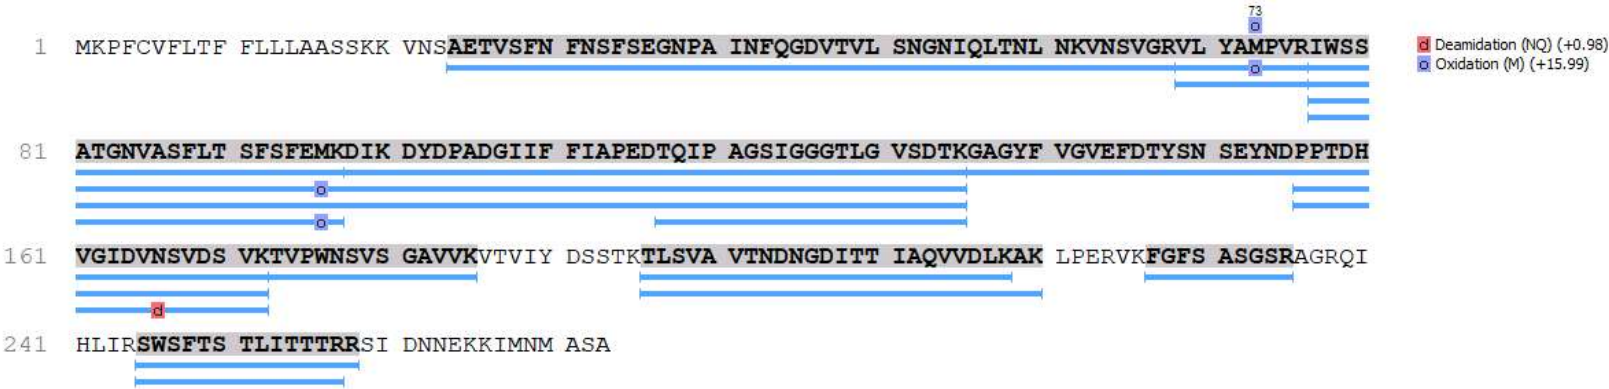

Supporting Peptides:

| Peptide                                                                | Uniq | -10lgP | Mass      | Length | ppm  | m/z       | z | RT    | Fraction | Scan     | Source File       | Area Roast Ara h 3 | #Feature | #Feature Roast Ara h 3 | Start | End | PTM           | AScore                     | Found By |
|------------------------------------------------------------------------|------|--------|-----------|--------|------|-----------|---|-------|----------|----------|-------------------|--------------------|----------|------------------------|-------|-----|---------------|----------------------------|----------|
| R,SWSFTSTLITTR,R                                                       | N    | 200.00 | 1499.7620 | 13     | -1.1 | 750.8890  | 2 | 34.40 | 11       | F11:1663 | OB5948 H3B Ro.raw | 1,0426E6           | 6        | 6                      | 245   | 257 |               |                            | PEAKS DB |
| R,IWSSATGNVASFLTSFSFEMK,D                                              | N    | 200.00 | 2309.1038 | 21     | -0.7 | 1155.5608 | 2 | 39.93 | 11       | F11:1986 | OB5948 H3B Ro.raw | 5,3682E5           | 3        | 3                      | 77    | 97  |               |                            | PEAKS DB |
| K,TLSSAVTNDNGDITIIAQVVDLK,A                                            | N    | 126.86 | 2386.2590 | 23     | 0.6  | 1194.1405 | 2 | 36.05 | 10       | F10:1608 | OB5926 H3B Ro.raw | 7,7468E5           | 3        | 3                      | 196   | 218 |               |                            | PEAKS DB |
| K,DIKDYPADGIIFFIAPEDTQIPAGSIGGGTLGVSDTK,G                              | N    | 120.14 | 3892.9258 | 38     | 0.9  | 1298.6531 | 3 | 38.97 | 11       | F11:1923 | OB5948 H3B Ro.raw | 1,1326E6           | 3        | 3                      | 98    | 135 |               |                            | PEAKS DB |
| R,IWSSATGNVASFLTSFSFEM(+15.99)K,D                                      | N    | 119.39 | 2325.0986 | 21     | -0.6 | 1163.5583 | 2 | 38.94 | 11       | F11:1921 | OB5948 H3B Ro.raw | 4,3252E4           | 1        | 1                      | 77    | 97  | Oxidation (M) | M20:Oxidation (M): 1000.00 | PEAKS DB |
| D,PPTDHSVIGIDVNSVDSVK,T                                                | N    | 115.65 | 1777.8846 | 17     | -1.1 | 593.6361  | 3 | 29.68 | 11       | F11:1382 | OB5948 H3B Ro.raw | 1,08E6             | 10       | 10                     | 156   | 172 |               |                            | PEAKS DB |
| K,TVPWNSVSGAVVK,V                                                      | N    | 110.22 | 1342.7245 | 13     | -0.7 | 672.3705  | 2 | 30.95 | 11       | F11:1462 | OB5948 H3B Ro.raw | 1,4337E5           | 3        | 3                      | 173   | 185 |               |                            | PEAKS DB |
| R,VLYAMPVR,I                                                           | N    | 103.56 | 947.5262  | 8      | -1.9 | 474.7705  | 2 | 29.80 | 11       | F11:1400 | OB5948 H3B Ro.raw | 5,0266E5           | 3        | 3                      | 69    | 76  |               |                            | PEAKS DB |
| K,TLSSAVTNDNGDITIIAQVVDLKAK,L                                          | N    | 67.79  | 2585.3911 | 25     | -1.3 | 862.8051  | 3 | 34.40 | 11       | F11:1665 | OB5948 H3B Ro.raw | 1,5947E4           | 1        | 1                      | 196   | 220 |               |                            | PEAKS DB |
| K,GAGYFVGVEFDYTSNSEYNDPPTDHSVIGIDVNSVDSVK,T                            | Y    | 64.56  | 3992.7864 | 37     | -1.8 | 1331.9365 | 3 | 35.53 | 11       | F11:1727 | OB5948 H3B Ro.raw | 6,5603E4           | 1        | 1                      | 136   | 172 |               |                            | PEAKS DB |
| R,SWSFTSTLITTRR,S                                                      | N    | 62.89  | 1655.8632 | 14     | -1.8 | 828.9391  | 2 | 33.07 | 11       | F11:1575 | OB5948 H3B Ro.raw | 1,4683E6           | 5        | 5                      | 245   | 258 |               |                            | PEAKS DB |
| K,FGFSASGSR,A                                                          | Y    | 58.08  | 914.4246  | 9      | 1.0  | 458.2212  | 2 | 27.95 | 10       | F10:1148 | OB5926 H3B Ro.raw | 0                  | 0        | 0                      | 227   | 235 |               |                            | PEAKS DB |
| R,IWSSATGNVASFLTSFSFEM(+15.99)KDIKDYPADGIIFFIAPEDTQIPAGSIGGGTLGVSDTK,G | N    | 52.25  | 6200.0137 | 59     | 1.2  | 1551.0165 | 4 | 41.20 | 10       | F10:1895 | OB5926 H3B Ro.raw | 7,8846E5           | 1        | 1                      | 77    | 135 | Oxidation (M) | M20:Oxidation (M): 1000.00 | PEAKS DB |
| R,VLYAM(+15.99)PVR,I                                                   | N    | 51.60  | 963.5212  | 8      | -1.9 | 482.7680  | 2 | 27.02 | 11       | F11:1243 | OB5948 H3B Ro.raw | 1,3575E4           | 3        | 3                      | 69    | 76  | Oxidation (M) | M5:Oxidation (M): 1000.00  | PEAKS DB |
| total 22 peptides                                                      |      |        |           |        |      |           |   |       |          |          |                   |                    |          |                        |       |     |               |                            |          |



| Peptide                                                        | Uniq | -10lgP | Mass      | Length | ppm  | m/z       | z | RT    | Fraction | Scan     | Source File       | Area Roast Ara h 3 | #Feature | #Feature Roast Ara h 3 | Start | End | PTM              | AScore                       | Found By  |
|----------------------------------------------------------------|------|--------|-----------|--------|------|-----------|---|-------|----------|----------|-------------------|--------------------|----------|------------------------|-------|-----|------------------|------------------------------|-----------|
| K.TLSVAVTNDN(+.98)GDITITIAQVVDLK.A                             | N    | 51.13  | 2387.2432 | 23     | -0.7 | 1194.6310 | 2 | 36.59 | 10       | F10:1638 | OB5926 H3B Ro.raw | 0                  | 0        | 0                      | 196   | 218 |                  | N10:Deamidation (NQ):8.22    | PEAKS DB  |
| S.AETVSFNFNSFSEGNPAINFQGDVTVLSNGNIQLTNLKNVSVGR.V               | N    | 49.99  | 4812.3740 | 45     | 4.5  | 1605.1392 | 3 | 40.87 | 12       | F12:2044 | OB5949 H3B Ro.raw | 5.6245E6           | 3        | 3                      | 24    | 68  |                  |                              | PEAKS DB  |
| R.SW(+31.99)SFTSTLITTR.R                                       | N    | 46.85  | 1531.7518 | 13     | -1.2 | 766.8839  | 2 | 33.45 | 11       | F11:1617 | OB5948 H3B Ro.raw | 3.3337E3           | 1        | 1                      | 245   | 257 |                  | W2:Dihydroxy:17.01           | PEAKS PTM |
| D.PPTDHVGIDVN(+.98)SVDSVK.T                                    | N    | 45.57  | 1778.8687 | 17     | 2.6  | 593.9665  | 3 | 29.71 | 10       | F10:1235 | OB5926 H3B Ro.raw | 0                  | 0        | 0                      | 156   | 172 | Deamidation (NQ) | N11:Deamidation (NQ):1000.00 | PEAKS DB  |
| K.GAGYFVGVEFDYSN(+.98)SEYNDPPTDHVGIDVNSVDSVK.T                 | Y    | 40.96  | 3993.7703 | 37     | 7.4  | 1332.2772 | 3 | 35.85 | 10       | F10:1577 | OB5926 H3B Ro.raw | 2.0916E5           | 1        | 1                      | 136   | 172 |                  | N15:Deamidation (NQ):25.70   | PEAKS DB  |
| R.IWSSATGNVASFLTSFSFEMKDIKDYDPADGIIFIAPEDTQIPAGSIGGGTLGVSDTK.G | N    | 40.18  | 6184.0190 | 59     | 0.9  | 1547.0173 | 4 | 42.35 | 10       | F10:1960 | OB5926 H3B Ro.raw | 8.2055E5           | 1        | 1                      | 77    | 135 |                  |                              | PEAKS DB  |
| S.AETVSFNFNSFSEGNPAINFQGDVTVLSNGNIQLTNL(+.98)KNVSVGR.V         | N    | 33.54  | 4813.3584 | 45     | 8.6  | 1204.3572 | 4 | 38.44 | 12       | F12:1904 | OB5949 H3B Ro.raw | 0                  | 0        | 0                      | 24    | 68  |                  | N38:Deamidation (NQ):0.00    | PEAKS DB  |
| D.TQIPAGSIGGGTLGVSDTK.G                                        | N    | 31.05  | 1757.9159 | 19     | 0.6  | 879.9658  | 2 | 30.69 | 12       | F12:1451 | OB5949 H3B Ro.raw | 0                  | 0        | 0                      | 117   | 135 |                  |                              | PEAKS DB  |
| total 22 peptides                                              |      |        |           |        |      |           |   |       |          |          |                   |                    |          |                        |       |     |                  |                              |           |

Q5I6T2|Q5I6T2\_ARAHY

back to list

| Protein Coverage | Supporting Peptides |

Protein Coverage:

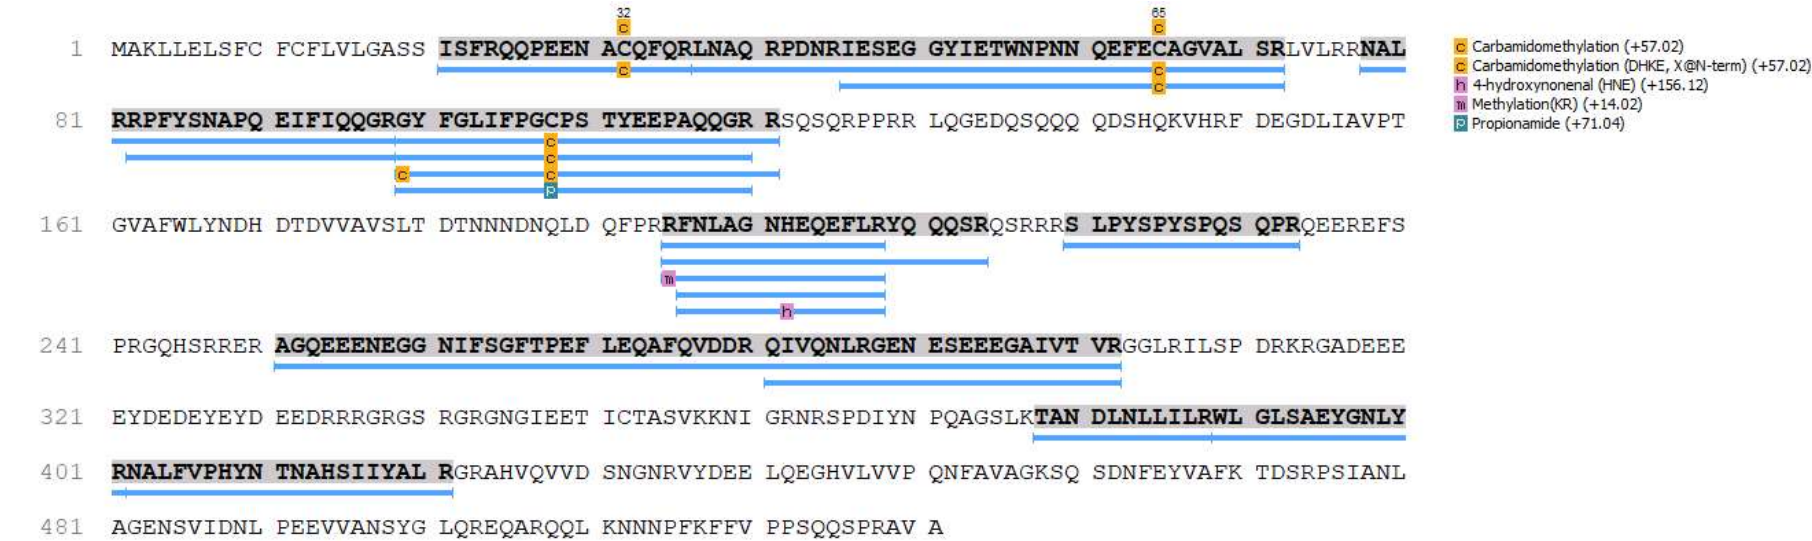

Supporting Peptides:

| Peptide                                          | Uniq | -10lgP | Mass      | Length | ppm  | m/z       | z | RT    | Fraction | Scan     | Source File       | Area Roast Ara h 3 | #Feature | #Feature Roast Ara h 3 | Start | End | PTM                                                         | AScore                                                                              | Found By  |
|--------------------------------------------------|------|--------|-----------|--------|------|-----------|---|-------|----------|----------|-------------------|--------------------|----------|------------------------|-------|-----|-------------------------------------------------------------|-------------------------------------------------------------------------------------|-----------|
| R.GYFGLIFPGC(+57.02)PSTYEPAQQGR,R                | N    | 200.00 | 2473.1372 | 22     | 3.0  | 1237.5796 | 2 | 36.11 | 7        | F7:1750  | OB5951 H3A Ro.raw | 1.587E6            | 6        | 6                      | 99    | 120 | Carbamidomethylation                                        | C10:Carbamido methylation:10 00.00                                                  | PEAKS DB  |
| R.WLGLSAEYGNLYR,N                                | N    | 163.36 | 1540.7673 | 13     | -0.8 | 771.3920  | 2 | 34.97 | 11       | F11:1697 | OB5948 H3B Ro.raw | 6.3564E5           | 6        | 6                      | 389   | 401 |                                                             |                                                                                     | PEAKS DB  |
| R.RPFYSNAPQEIFIQQGR,G                            | N    | 137.88 | 2050.0383 | 17     | 3.2  | 684.3556  | 3 | 31.52 | 7        | F7:1483  | OB5951 H3A Ro.raw | 5.9353E6           | 9        | 9                      | 82    | 98  |                                                             |                                                                                     | PEAKS DB  |
| R.NALRRPFYSNAPQEIFIQQGR,G                        | N    | 125.40 | 2504.3037 | 21     | 1.0  | 835.7760  | 3 | 32.71 | 9        | F9:1535  | OB5953 H3A Ro.raw | 6.1298E6           | 10       | 10                     | 78    | 98  |                                                             |                                                                                     | PEAKS DB  |
| R.FNLAGNHEQEFLR,Y                                | N    | 104.44 | 1573.7637 | 13     | 4.3  | 787.8925  | 2 | 30.57 | 7        | F7:1440  | OB5951 H3A Ro.raw | 1.243E5            | 7        | 7                      | 196   | 208 |                                                             |                                                                                     | PEAKS DB  |
| R.RFNLAGNHEQEFLR,Y                               | N    | 99.39  | 1729.8647 | 14     | 1.5  | 577.6297  | 3 | 31.36 | 9        | F9:1478  | OB5953 H3A Ro.raw | 1.8255E6           | 6        | 6                      | 195   | 208 |                                                             |                                                                                     | PEAKS DB  |
| R.GYFGLIFPGC(+57.02)PSTYEPAQQGRR,S               | N    | 99.33  | 2629.2383 | 23     | 2.4  | 877.4221  | 3 | 35.18 | 9        | F9:1676  | OB5953 H3A Ro.raw | 4.5018E6           | 7        | 7                      | 99    | 121 | Carbamidomethylation                                        | C10:Carbamido methylation:10 00.00                                                  | PEAKS DB  |
| K.TANDLNLILR,W                                   | N    | 75.51  | 1254.7296 | 11     | 1.1  | 628.3727  | 2 | 34.39 | 7        | F7:1659  | OB5951 H3A Ro.raw | 1.8375E5           | 4        | 4                      | 378   | 388 |                                                             |                                                                                     | PEAKS DB  |
| R.GYFGLIFPGC(+71.04)PSTYEPAQQGR,R                | N    | 72.57  | 2487.1528 | 22     | 2.6  | 1244.5869 | 2 | 36.34 | 9        | F9:1767  | OB5953 H3A Ro.raw | 2.3282E4           | 2        | 2                      | 99    | 120 | Propionamide                                                | C10:Propionamide:1000.00                                                            | PEAKS PTM |
| R.IESEGGYIETWPNPNQEFEC(+57.02)AGVALSR,L          | N    | 66.94  | 3069.3774 | 27     | 6.2  | 1535.7054 | 2 | 34.89 | 8        | F8:1684  | OB5952 H3A Ro.raw | 0                  | 0        | 0                      | 46    | 72  | Carbamidomethylation                                        | C20:Carbamido methylation:10 00.00                                                  | PEAKS DB  |
| R.RFNLAGNHEQEFLRYQQQR,Q                          | N    | 66.29  | 2520.2371 | 20     | -2.2 | 631.0667  | 4 | 34.12 | 10       | F10:1496 | OB5926 H3B Ro.raw | 7.5688E4           | 2        | 2                      | 195   | 214 |                                                             |                                                                                     | PEAKS DB  |
| R.NALFVPHYNTNAHSIIYALR,G                         | N    | 63.14  | 2313.2019 | 20     | 0.2  | 772.0747  | 3 | 35.15 | 7        | F7:1685  | OB5951 H3A Ro.raw | 9.0952E5           | 5        | 5                      | 402   | 421 |                                                             |                                                                                     | PEAKS DB  |
| S.ISFRQQPEENAC(+57.02)QFQR,L                     | N    | 45.61  | 2036.9486 | 16     | -1.4 | 679.9907  | 3 | 28.84 | 11       | F11:1329 | OB5948 H3B Ro.raw | 4.7949E4           | 5        | 5                      | 21    | 36  | Carbamidomethylation                                        | C12:Carbamido methylation:10 00.00                                                  | PEAKS DB  |
| R.RFNLAGNH(+14.02)EQEFLR,Y                       | N    | 41.89  | 1743.8805 | 14     | 0.5  | 582.3011  | 3 | 31.14 | 7        | F7:1453  | OB5951 H3A Ro.raw | 4.477E5            | 2        | 2                      | 195   | 208 |                                                             | H8:Methylation (others):40.00                                                       | PEAKS PTM |
| R.QIVQNLRGENSEEEGAIVTVR,G                        | Y    | 38.40  | 2469.2458 | 22     | 7.0  | 824.0950  | 3 | 30.09 | 7        | F7:1410  | OB5951 H3A Ro.raw | 0                  | 0        | 0                      | 281   | 302 |                                                             |                                                                                     | PEAKS DB  |
| R.G(+57.02)YFGLIFPGC(+57.02)PSTYEPAQQGRR,S       | N    | 35.90  | 2686.2598 | 23     | 1.6  | 896.4286  | 3 | 35.57 | 8        | F8:1718  | OB5952 H3A Ro.raw | 5.4933E4           | 1        | 1                      | 99    | 121 | Carbamidomethylation (DHKE, X@N-term); Carbamidomethylation | G1:Carbamido methylation (D HKE, X@N-term):130.55;C1 0:Carbamidomethylation:1000.00 | PEAKS PTM |
| R.LNAQRPDNRIESEGGYIETWPNPNQEFEC(+57.02)AGVALSR,L | N    | 35.63  | 4133.9248 | 36     | 4.2  | 1034.4928 | 4 | 36.08 | 8        | F8:1752  | OB5952 H3A Ro.raw | 1.6394E5           | 1        | 1                      | 37    | 72  | Carbamidomethylation                                        | C29:Carbamido methylation:10 00.00                                                  | PEAKS DB  |
| R.RPFYSNAP(+15.99)QEIFIQQGR,G                    | N    | 34.29  | 2066.0332 | 17     | 0.2  | 689.6852  | 3 | 31.94 | 9        | F9:1497  | OB5953 H3A Ro.raw | 4.3282E4           | 1        | 1                      | 82    | 98  |                                                             | P8:Oxidation or Hydroxylation:3 2.28                                                | PEAKS PTM |
| R.SLPYSPYSP(+31.99)QSQPR,Q                       | N    | 33.78  | 1637.7686 | 14     | 3.2  | 819.8942  | 2 | 27.07 | 7        | F7:1250  | OB5951 H3A Ro.raw | 6.6096E3           | 1        | 1                      | 220   | 233 |                                                             | P9:Di-hydroxy: 9.42                                                                 | PEAKS PTM |
| R.R(+14.02)FNLAGNHEQEFLR,Y                       | N    | 32.14  | 1743.8805 | 14     | 0.9  | 582.3013  | 3 | 31.38 | 8        | F8:1472  | OB5952 H3A Ro.raw | 2.9356E5           | 2        | 2                      | 195   | 208 | Methylation(KR)                                             | R1:Methylation (KR):67.58                                                           | PEAKS PTM |

total 25 peptides

| Peptide                                                         | Uniq | -10lgP | Mass      | Length | ppm  | m/z       | z | RT    | Fraction | Scan     | Source File       | Area Roast Ara h 3 | #Feature | #Feature Roast Ara h 3 | Start | End | PTM                    | AScore                            | Found By  |
|-----------------------------------------------------------------|------|--------|-----------|--------|------|-----------|---|-------|----------|----------|-------------------|--------------------|----------|------------------------|-------|-----|------------------------|-----------------------------------|-----------|
| R.RFNLAGNHEQ(+.98)EFLRYQQSR.Q                                   | N    | 31.27  | 2521.2209 | 20     | 5.0  | 631.3173  | 4 | 34.33 | 10       | F10:1528 | OB5926 H3B Ro.raw | 4.7768E4           | 1        | 1                      | 195   | 214 |                        | Q10:Deamidation (NQ):0.00         | PEAKS DB  |
| R.FNLAGNH(+14.02)EQEFLR.Y                                       | N    | 31.24  | 1587.7793 | 13     | 0.7  | 530.2674  | 3 | 30.81 | 8        | F8:1450  | OB5952 H3A Ro.raw | 6.1216E4           | 1        | 1                      | 196   | 208 |                        | H7:Methylation (others):14.02     | PEAKS PTM |
| R.FNLAGNH(+156.12)EQEFLR.Y                                      | N    | 31.09  | 1729.8788 | 13     | -7.6 | 577.6292  | 3 | 31.13 | 7        | F7:1444  | OB5951 H3A Ro.raw | 2.4781E5           | 1        | 1                      | 196   | 208 | 4-hydroxynonenal (HNE) | H7:4-hydroxynonenal (HNE):1000.00 | PEAKS PTM |
| R.AGQEEENEENEGN(+.98)IFSGTFPEFLEQAFQVDDRQIVQNLRGENSEEEGAIVTVR.G | Y    | 30.95  | 5811.7046 | 52     | 7.3  | 1453.9441 | 4 | 39.59 | 9        | F9:1932  | OB5953 H3A Ro.raw | 4.3973E5           | 1        | 1                      | 251   | 302 |                        | N11:Deamidation (NQ):0.00         | PEAKS DB  |
| R.RFN(+.98)LAGNHEQEFLR.Y                                        | N    | 30.90  | 1730.8488 | 14     | 9.2  | 577.9634  | 3 | 32.85 | 11       | F11:1572 | OB5948 H3B Ro.raw | 0                  | 0        | 0                      | 195   | 208 |                        | N3:Deamidation (NQ):17.65         | PEAKS DB  |
| total 25 peptides                                               |      |        |           |        |      |           |   |       |          |          |                   |                    |          |                        |       |     |                        |                                   |           |

A1E2B0|A1E2B0\_ARAHY

[back to list](#)

[Protein Coverage](#) | [Supporting Peptides](#) |

Protein Coverage:

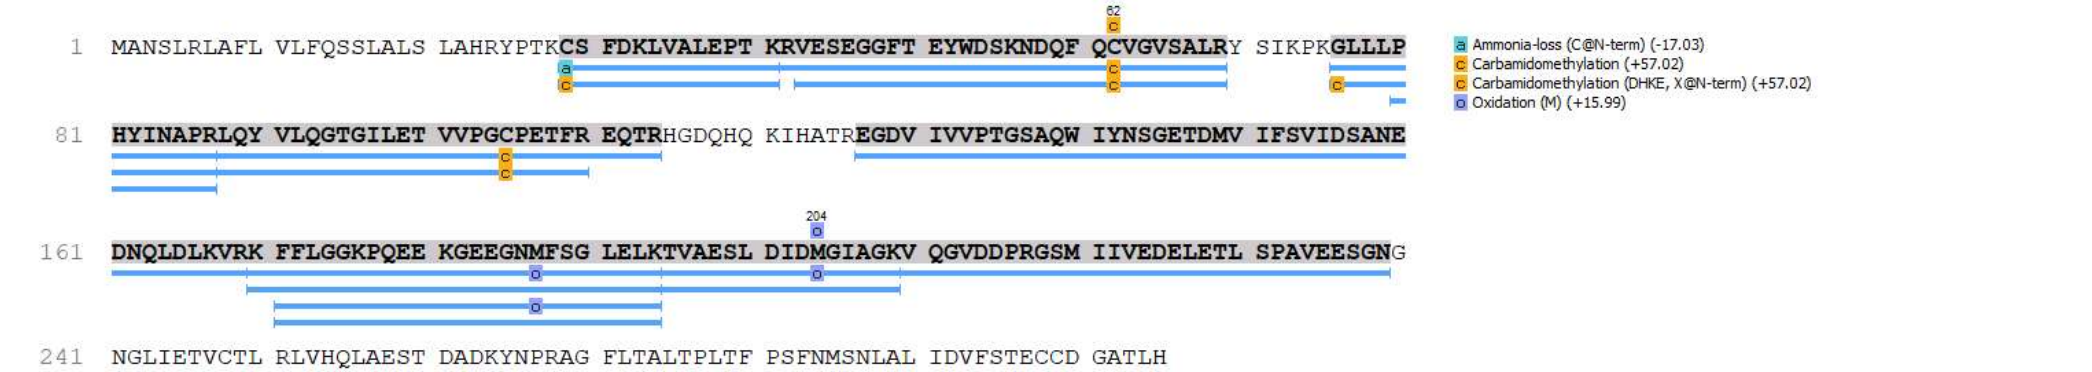

Supporting Peptides:

| Peptide                                 | Uniq | -10lgP | Mass      | Length | ppm  | m/z       | z | RT    | Fraction | Scan     | Source File       | Area Roast Ara h 3 | #Feature | #Feature Roast Ara h 3 | Start | End | PTM                  | AScore                           | Found By |
|-----------------------------------------|------|--------|-----------|--------|------|-----------|---|-------|----------|----------|-------------------|--------------------|----------|------------------------|-------|-----|----------------------|----------------------------------|----------|
| K.TVAESLDIDMGIAGK.V                     | Y    | 135.15 | 1518.7599 | 15     | -1.6 | 760.3879  | 2 | 33.39 | 10       | F10:1446 | OB5926 H3B Ro.raw | 8.1424E4           | 2        | 2                      | 195   | 209 |                      |                                  | PEAKS DB |
| K.GLLPHYINAPR.L                         | Y    | 133.17 | 1362.7771 | 12     | -2.0 | 682.3959  | 2 | 32.12 | 11       | F11:1521 | OB5948 H3B Ro.raw | 2.2835E6           | 7        | 7                      | 76    | 87  |                      |                                  | PEAKS DB |
| R.LQYVLQGTGILETVVPGC(+57.02)PETFR.E     | Y    | 122.40 | 2576.3308 | 23     | 1.3  | 1289.1771 | 2 | 36.71 | 11       | F11:1795 | OB5948 H3B Ro.raw | 6.8807E4           | 2        | 2                      | 88    | 110 | Carbamidomethylation | C18:Carbamidomethylation:1000.00 | PEAKS DB |
| R.KFFLGGKPQEEKGEEGNMFSGLELK.T           | N    | 102.43 | 2798.3948 | 25     | -0.4 | 933.8075  | 3 | 36.62 | 10       | F10:1634 | OB5926 H3B Ro.raw | 2.112E5            | 1        | 1                      | 170   | 194 |                      |                                  | PEAKS DB |
| R.LQYVLQGTGILETVVPGC(+57.02)PETFREQTR.H | Y    | 100.71 | 3090.5808 | 27     | 2.4  | 1031.2056 | 3 | 35.54 | 11       | F11:1773 | OB5948 H3B Ro.raw | 8.3413E6           | 6        | 6                      | 88    | 114 | Carbamidomethylation | C18:Carbamidomethylation:1000.00 | PEAKS DB |
| K.TVAESLDIDM(+15.99)GIAGK.V             | Y    | 98.92  | 1534.7549 | 15     | -1.2 | 768.3854  | 2 | 30.91 | 11       | F11:1459 | OB5948 H3B Ro.raw | 5.6446E3           | 1        | 1                      | 195   | 209 | Oxidation (M)        | M10:Oxidation (M):1000.00        | PEAKS DB |
| total 20 peptides                       |      |        |           |        |      |           |   |       |          |          |                   |                    |          |                        |       |     |                      |                                  |          |



| Peptide                                              | Uniq | -10lgP | Mass      | Length | ppm  | m/z       | z | RT    | Fraction | Scan     | Source File       | Area Roast Ara h 3 | #Feature | #Feature Roast Ara h 3 | Start | End | PTM                                   | AScore                                                                            | Found By  |
|------------------------------------------------------|------|--------|-----------|--------|------|-----------|---|-------|----------|----------|-------------------|--------------------|----------|------------------------|-------|-----|---------------------------------------|-----------------------------------------------------------------------------------|-----------|
| R.VESEGGFTEYWDSKNDQFQC(+57.02)VGVSALR.Y              | Y    | 97.89  | 3107.3931 | 27     | 2.8  | 1036.8079 | 3 | 34.76 | 12       | F12:1692 |                   | 9.1132E5           | 3        | 3                      | 43    | 69  | Carbamidomethylation                  | C20:Carbamidomethylation:1000.00                                                  | PEAKS DB  |
|                                                      |      |        |           |        |      |           |   |       |          |          |                   | OB5949 H3B Ro.raw  |          |                        |       |     |                                       |                                                                                   |           |
| K.FFLGGKPQEEKGEEGNMFSGLELK.T                         | N    | 92.04  | 2670.2998 | 24     | -0.7 | 891.1088  | 3 | 36.43 | 10       | F10:1612 | OB5926 H3B Ro.raw | 1.0891E6           | 5        | 5                      | 171   | 194 |                                       |                                                                                   | PEAKS DB  |
| K.G(+57.02)LLLPHYINAPR.L                             | Y    | 87.45  | 1419.7986 | 12     | -1.2 | 710.9072  | 2 | 32.70 | 11       | F11:1554 | OB5948 H3B Ro.raw | 1.9861E5           | 3        | 3                      | 76    | 87  | Carbamidomethylation (DHKE, X@N-term) | G1:Carbamidomethylation (DHKE, X@N-term):71.64                                    | PEAKS PTM |
| R.EGDVIVPTGSAQWIYNSGETDMVIFSVIDSANEDNQLDLKVR.K       | Y    | 78.53  | 4723.2964 | 43     | 0.8  | 1575.4441 | 3 | 40.31 | 11       | F11:1999 | OB5948 H3B Ro.raw | 4.2652E5           | 2        | 2                      | 127   | 169 |                                       |                                                                                   | PEAKS DB  |
| K.RVESEGGFTEYWDSKNDQFQC(+57.02)VGVSALR.Y             | Y    | 77.67  | 3263.4941 | 28     | -0.3 | 1088.8411 | 3 | 34.90 | 10       | F10:1540 | OB5926 H3B Ro.raw | 7.5628E4           | 1        | 1                      | 42    | 69  | Carbamidomethylation                  | C21:Carbamidomethylation:1000.00                                                  | PEAKS DB  |
| K.FFLGGKPQEEKGEEGNM(+15.99)FSGLELK.T                 | N    | 67.27  | 2686.2947 | 24     | -0.9 | 896.4402  | 3 | 34.90 | 10       | F10:1542 | OB5926 H3B Ro.raw | 3.9762E5           | 3        | 3                      | 171   | 194 | Oxidation (M)                         | M17:Oxidation (M):1000.00                                                         | PEAKS DB  |
| K.VQGVDDPRGSMIIVEDELETLSPAVEESGN.G                   | Y    | 62.82  | 3184.5081 | 30     | 4.2  | 1593.2681 | 2 | 38.96 | 12       | F12:1934 | OB5949 H3B Ro.raw | 0                  | 0        | 0                      | 210   | 239 |                                       |                                                                                   | PEAKS DB  |
| K.C(+57.02)SFDKLVALEPTK.R                            | Y    | 51.24  | 1506.7751 | 13     | -0.8 | 754.3959  | 2 | 31.21 | 11       | F11:1476 | OB5948 H3B Ro.raw | 0                  | 0        | 0                      | 29    | 41  | Carbamidomethylation                  | C1:Carbamidomethylation:1000.00                                                   | PEAKS DB  |
| L.PHYINAPR.L                                         | Y    | 39.30  | 966.5035  | 8      | -2.1 | 484.2592  | 2 | 33.21 | 10       | F10:1450 | OB5926 H3B Ro.raw | 4.9369E4           | 3        | 3                      | 80    | 87  |                                       |                                                                                   | PEAKS DB  |
| R.KFFLGGKPQEEKGEEGNM(+15.99)FSGLELK.T                | N    | 38.49  | 2814.3896 | 25     | 1.5  | 939.1409  | 3 | 35.47 | 10       | F10:1579 | OB5926 H3B Ro.raw | 8.019E4            | 1        | 1                      | 170   | 194 | Oxidation (M)                         | M18:Oxidation (M):1000.00                                                         | PEAKS DB  |
| R.EGDVIVPTGSAQ(+.98)WIYNSGETDMVIFSVIDSANEDNQLDLKVR.K | Y    | 36.81  | 4724.2803 | 43     | 5.1  | 1575.7793 | 3 | 40.63 | 10       | F10:1862 | OB5926 H3B Ro.raw | 2.2969E5           | 1        | 1                      | 127   | 169 |                                       | Q13:Deamidation (NQ):34.15                                                        | PEAKS DB  |
| R.LQYVLQGTGILETVVPGC(+57.02)PETFREQ(+.98)TR.H        | Y    | 35.03  | 3091.5647 | 27     | 1.2  | 1031.5322 | 3 | 43.45 | 11       | F11:2184 | OB5948 H3B Ro.raw | 0                  | 0        | 0                      | 88    | 114 | Carbamidomethylation                  | C18:Carbamidomethylation:1000.00;Q25:Deamidation (NQ):42.82                       | PEAKS DB  |
| K.C(-17.03)SFD(+57.02)KLVALEPTK.R                    | Y    | 30.70  | 1489.7487 | 13     | 0.1  | 745.8835  | 2 | 34.51 | 10       | F10:1523 | OB5926 H3B Ro.raw | 1.2812E4           | 1        | 1                      | 29    | 41  | Ammonia-loss (C@N-term)               | C1:Ammonia-loss (C@N-term):1000.00;D4:Carbamidomethylation (DHKE, X@N-term):17.01 | PEAKS PTM |
| R.LQYVLQGTGILETVVPGC(+57.02)PETFR(+14.02)EQTR.H      | Y    | 29.28  | 3104.5964 | 27     | 0.7  | 1035.8757 | 3 | 35.54 | 11       | F11:1791 | OB5948 H3B Ro.raw | 3.2709E5           | 1        | 1                      | 88    | 114 | Carbamidomethylation                  | C18:Carbamidomethylation:1000.00;R23:Methylation(KR):11.01                        | PEAKS PTM |
| total 20 peptides                                    |      |        |           |        |      |           |   |       |          |          |                   |                    |          |                        |       |     |                                       |                                                                                   |           |

E9LFE8|E9LFE8\_ARAHY

[back to list](#)

| [Protein Coverage](#) | [Supporting Peptides](#) |

Protein Coverage:

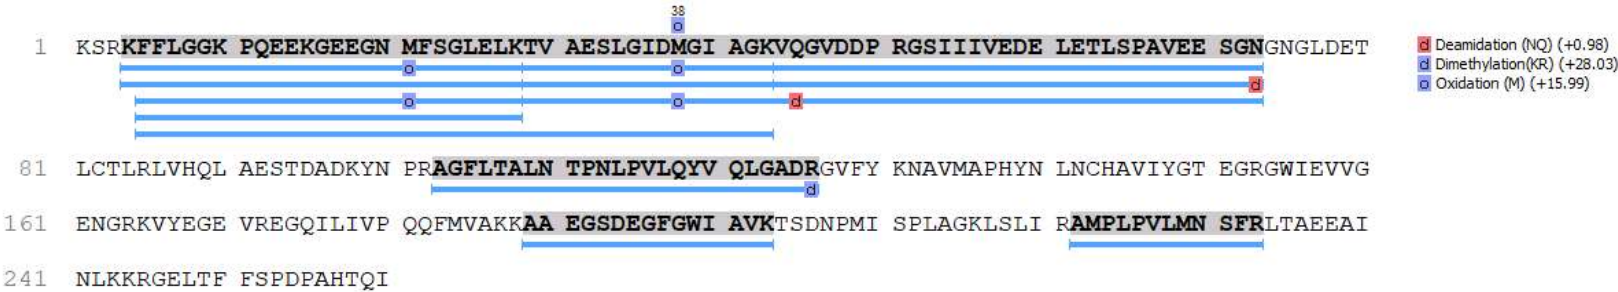

Supporting Peptides:

| Peptide                                                        | Uniq | -10lgP | Mass      | Length | ppm  | m/z       | z | RT    | Fraction | Scan     | Source File       | Area Roast Ara h 3 | #Feature | #Feature Roast Ara h 3 | Start | End | PTM                             | AScore                                               | Found By  |
|----------------------------------------------------------------|------|--------|-----------|--------|------|-----------|---|-------|----------|----------|-------------------|--------------------|----------|------------------------|-------|-----|---------------------------------|------------------------------------------------------|-----------|
| K.TVAESLGIDMGIAGK.V                                            | Y    | 164.96 | 1460.7544 | 15     | -1.4 | 731.3850  | 2 | 33.26 | 11       | F11:1598 | OB5948 H3B Ro.raw | 1.9292E5           | 4        | 4                      | 29    | 43  |                                 |                                                      | PEAKS DB  |
| K.AAEGSDEGFGWIAVK.T                                            | Y    | 126.69 | 1535.7256 | 15     | 0.1  | 768.8702  | 2 | 33.25 | 7        | F7:1594  | OB5951 H3A Ro.raw | 2.9372E4           | 3        | 3                      | 189   | 203 |                                 |                                                      | PEAKS DB  |
| K.VQGVDDPRGSIIVEDELETLSPAVEESGN.G                              | Y    | 105.29 | 3166.5518 | 30     | 2.1  | 1584.2899 | 2 | 39.16 | 11       | F11:1927 | OB5948 H3B Ro.raw | 1.8789E6           | 3        | 3                      | 44    | 73  |                                 |                                                      | PEAKS DB  |
| R.KFFLGKKPQEEKGEEGNMFSGLELK.T                                  | N    | 102.43 | 2798.3948 | 25     | -0.4 | 933.8075  | 3 | 36.62 | 10       | F10:1634 | OB5926 H3B Ro.raw | 2.112E5            | 1        | 1                      | 4     | 28  |                                 |                                                      | PEAKS DB  |
| K.TVAESLGIDM(+15.99)GIAGK.V                                    | Y    | 99.82  | 1476.7494 | 15     | -2.7 | 739.3818  | 2 | 30.86 | 10       | F10:1300 | OB5926 H3B Ro.raw | 3.516E3            | 1        | 1                      | 29    | 43  | Oxidation (M)                   | M10:Oxidation (M):1000.00                            | PEAKS DB  |
| K.FFLGGKPQEEKGEEGNMFSGLELK.T                                   | N    | 92.04  | 2670.2998 | 24     | -0.7 | 891.1088  | 3 | 36.43 | 10       | F10:1612 | OB5926 H3B Ro.raw | 1.0891E6           | 5        | 5                      | 5     | 28  |                                 |                                                      | PEAKS DB  |
| R.AGFLTALNTPNLPVLQYVQLGADR(+28.03).G                           | Y    | 90.94  | 2598.4170 | 24     | 4.0  | 1300.2209 | 2 | 39.97 | 9        | F9:1967  | OB5953 H3A Ro.raw | 5.2434E5           | 5        | 5                      | 103   | 126 | Dimethylation(KR)               | R24:Dimethylation(KR):1000.00                        | PEAKS PTM |
| K.FFLGGKPQEEKGEEGNM(+15.99)FSGLELK.T                           | N    | 67.27  | 2686.2947 | 24     | -0.9 | 896.4402  | 3 | 34.90 | 10       | F10:1542 | OB5926 H3B Ro.raw | 3.9762E5           | 3        | 3                      | 5     | 28  | Oxidation (M)                   | M17:Oxidation (M):1000.00                            | PEAKS DB  |
| K.VQGVDDPRGSIIVEDELETLSPAVEESGN(+.98).G                        | Y    | 58.55  | 3167.5356 | 30     | 9.3  | 1056.8623 | 3 | 39.51 | 12       | F12:1974 | OB5949 H3B Ro.raw | 3.4995E4           | 1        | 1                      | 44    | 73  | Deamidation (NQ)                | N30:Deamidation (NQ):53.58                           | PEAKS DB  |
| R.AMPLPVLN(+15.99)NSFR.L                                       | Y    | 42.81  | 1390.7101 | 12     | 1.6  | 696.3635  | 2 | 34.42 | 9        | F9:1639  | OB5953 H3A Ro.raw | 1.9478E4           | 1        | 1                      | 222   | 233 |                                 | M8:Oxidation (M):25.69                               | PEAKS DB  |
| R.KFFLGKKPQEEKGEEGNM(+15.99)FSGLELK.T                          | N    | 38.49  | 2814.3896 | 25     | 1.5  | 939.1409  | 3 | 35.47 | 10       | F10:1579 | OB5926 H3B Ro.raw | 8.019E4            | 1        | 1                      | 4     | 28  | Oxidation (M)                   | M18:Oxidation (M):1000.00                            | PEAKS DB  |
| K.TVAESLGIDM(+15.99)GIAGKVQ(+.98)GVDDPRGSIIVEDELETLSPAVEESGN.G | Y    | 34.42  | 4626.2744 | 45     | 7.8  | 1543.1107 | 3 | 39.51 | 12       | F12:1964 | OB5949 H3B Ro.raw | 3.4721E4           | 1        | 1                      | 29    | 73  | Oxidation (M); Deamidation (NQ) | M10:Oxidation (M):1000.00;Q17:Deamidation (NQ):73.94 | PEAKS DB  |
| K.FFLGGKPQEEKGEEGNMFSGLELKTVAESLGIDMGIAGK.V                    | Y    | 30.89  | 4113.0439 | 39     | -1.9 | 1029.2689 | 4 | 40.43 | 10       | F10:1855 | OB5926 H3B Ro.raw | 1.8985E5           | 1        | 1                      | 5     | 43  |                                 |                                                      | PEAKS DB  |
| total 13 peptides                                              |      |        |           |        |      |           |   |       |          |          |                   |                    |          |                        |       |     |                                 |                                                      |           |

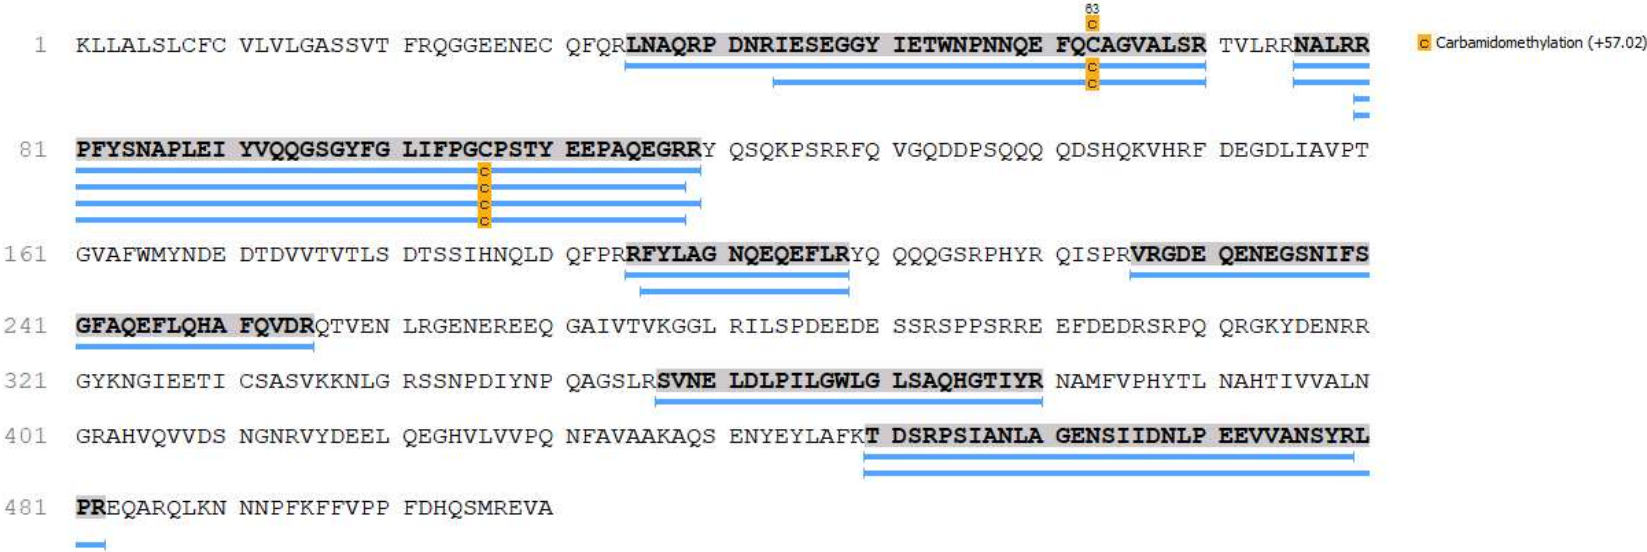

Supporting Peptides:

| Peptide                                                | Uniq | -10lgP | Mass      | Length | ppm  | m/z       | z | RT    | Fraction | Scan     | Source File       | Area Roast Ara h 3 | #Feature | #Feature Roast Ara h 3 | Start | End | PTM                  | AScore                           | Found By |
|--------------------------------------------------------|------|--------|-----------|--------|------|-----------|---|-------|----------|----------|-------------------|--------------------|----------|------------------------|-------|-----|----------------------|----------------------------------|----------|
| R.FYLAGNQEQEFLR.Y                                      | Y    | 135.23 | 1613.7837 | 13     | 0.1  | 807.8992  | 2 | 32.67 | 7        | F7:1561  | OB5951 H3A Ro.raw | 5.1792E4           | 4        | 4                      | 196   | 208 |                      |                                  | PEAKS DB |
| K.TDSRPSIANLAGENSIIDNLP EEVVANSYR.L                    | Y    | 112.03 | 3243.6006 | 30     | 0.9  | 1082.2107 | 3 | 36.51 | 11       | F11:1779 | OB5948 H3B Ro.raw | 3.6943E5           | 4        | 4                      | 450   | 479 |                      |                                  | PEAKS DB |
| R.SVNELDLPILGWLG LSAQHGTIYR.N                          | Y    | 105.06 | 2651.4070 | 24     | 0.2  | 884.8116  | 3 | 40.31 | 11       | F11:1994 | OB5948 H3B Ro.raw | 2.2662E6           | 12       | 12                     | 357   | 380 |                      |                                  | PEAKS DB |
| R.LNAQRPDNRISEGGYIETWNPNNQEFQC(+57.02)AGVALSR.T        | Y    | 102.77 | 4132.9409 | 36     | -0.3 | 1034.2444 | 4 | 33.64 | 11       | F11:1603 | OB5948 H3B Ro.raw | 1.9614E7           | 8        | 8                      | 35    | 70  | Carbamidomethylation | C29:Carbamidomethylation:1000.00 | PEAKS DB |
| R.RFYLAGNQEQEFLR.Y                                     | Y    | 74.35  | 1769.8849 | 14     | -1.3 | 590.9681  | 3 | 31.33 | 7        | F7:1486  | OB5951 H3A Ro.raw | 6.7764E4           | 3        | 3                      | 195   | 208 |                      |                                  | PEAKS DB |
| R.VRGDEQENEGSNIFSGFAQEFLQHA FQVDR.Q                    | Y    | 69.72  | 3453.5974 | 30     | 4.1  | 864.4102  | 4 | 39.78 | 9        | F9:1952  | OB5953 H3A Ro.raw | 3.9334E5           | 2        | 2                      | 226   | 255 |                      |                                  | PEAKS DB |
| R.RPFYSNAPLEIYVQQSGGYFGLIFPGC(+57.02)PSTYEPAQEGR.R     | Y    | 67.79  | 4424.0845 | 39     | 5.3  | 1475.7100 | 3 | 38.84 | 8        | F8:1912  | OB5952 H3A Ro.raw | 1.5644E6           | 3        | 3                      | 80    | 118 | Carbamidomethylation | C27:Carbamidomethylation:1000.00 | PEAKS DB |
| R.RPFYSNAPLEIYVQQSGGYFGLIFPGC(+57.02)PSTYEPAQEGR.Y     | Y    | 58.89  | 4580.1860 | 40     | 3.1  | 1146.0574 | 4 | 38.30 | 8        | F8:1880  | OB5952 H3A Ro.raw | 1.9768E5           | 1        | 1                      | 80    | 119 | Carbamidomethylation | C27:Carbamidomethylation:1000.00 | PEAKS DB |
| R.NALRRPFYSNAPLEIYVQQSGGYFGLIFPGC(+57.02)PSTYEPAQEGR.R | Y    | 47.55  | 4878.3501 | 43     | 2.7  | 1220.5981 | 4 | 38.66 | 9        | F9:1897  | OB5953 H3A Ro.raw | 5.9202E5           | 2        | 2                      | 76    | 118 | Carbamidomethylation | C31:Carbamidomethylation:1000.00 | PEAKS DB |
| K.TDSRPSIANLAGENSIIDNLP EEVVANSYRLPR.E                 | Y    | 45.23  | 3609.8386 | 33     | 2.2  | 903.4689  | 4 | 36.50 | 7        | F7:1770  | OB5951 H3A Ro.raw | 5.4722E5           | 3        | 3                      | 450   | 482 |                      |                                  | PEAKS DB |

| Peptide                                                  | Uniq | -10lgP | Mass      | Length | ppm  | m/z       | z | RT    | Fraction | Scan     | Source File       | Area Roast Ara h 3 | #Feature | #Feature Roast Ara h 3 | Start | End | PTM                  | AScore                                                      | Found By |
|----------------------------------------------------------|------|--------|-----------|--------|------|-----------|---|-------|----------|----------|-------------------|--------------------|----------|------------------------|-------|-----|----------------------|-------------------------------------------------------------|----------|
| R.RPFYSNAPLEIYVQQSGYFGLIFPGC(+57.02)PSTYEPAQ(+.98)EGRR.Y | Y    | 43.08  | 4581.1699 | 40     | 9.6  | 1146.3108 | 4 | 38.25 | 9        | F9:1866  | OB5953 H3A Ro.raw | 4.8906E5           | 2        | 2                      | 80    | 119 | Carbamidomethylation | C27:Carbamidomethylation:1000.00;Q36:Deamidation (NQ):12.58 | PEAKS DB |
| R.LNAQRPDNRIESEGGYIETWN(+.98)PNNQEFQC(+57.02)AGVALSR.T   | Y    | 33.79  | 4133.9248 | 36     | -0.7 | 1034.4878 | 4 | 43.56 | 8        | F8:2183  | OB5952 H3A Ro.raw | 0                  | 0        | 0                      | 35    | 70  | Carbamidomethylation | N21:Deamidation (NQ):7.58;C29:Carbamidomethylation:1000.00  | PEAKS DB |
| R.IESEGGYIETWNPNNQEFQC(+57.02)AGVALSR.T                  | N    | 33.38  | 3068.3933 | 27     | 2.9  | 1535.2084 | 2 | 34.64 | 8        | F8:1684  | OB5952 H3A Ro.raw | 7.7336E3           | 1        | 1                      | 44    | 70  | Carbamidomethylation | C20:Carbamidomethylation:1000.00                            | PEAKS DB |
| R.NALRRPFYSNAPLEIYVQQSGYFGLIFPGC(+57.02)PSTYEPAQEGRR.Y   | Y    | 31.63  | 5034.4512 | 44     | 1.2  | 1259.6216 | 4 | 37.82 | 7        | F7:1841  | OB5951 H3A Ro.raw | 8.5213E5           | 1        | 1                      | 76    | 119 | Carbamidomethylation | C31:Carbamidomethylation:1000.00                            | PEAKS DB |
| R.LNAQRPDNRIESEGGYIETWNPNN(+.98)QEFQC(+57.02)AGVALSR.T   | Y    | 30.18  | 4133.9248 | 36     | 3.3  | 1378.9868 | 3 | 34.37 | 12       | F12:1670 | OB5949 H3B Ro.raw | 2.7728E4           | 1        | 1                      | 35    | 70  | Carbamidomethylation | N24:Deamidation (NQ):0.00;C29:Carbamidomethylation:1000.00  | PEAKS DB |
| total 15 peptides                                        |      |        |           |        |      |           |   |       |          |          |                   |                    |          |                        |       |     |                      |                                                             |          |

Q0GM57|Q0GM57\_ARAHY

[back to list](#)

[Protein Coverage](#) | [Supporting Peptides](#) |

Protein Coverage:

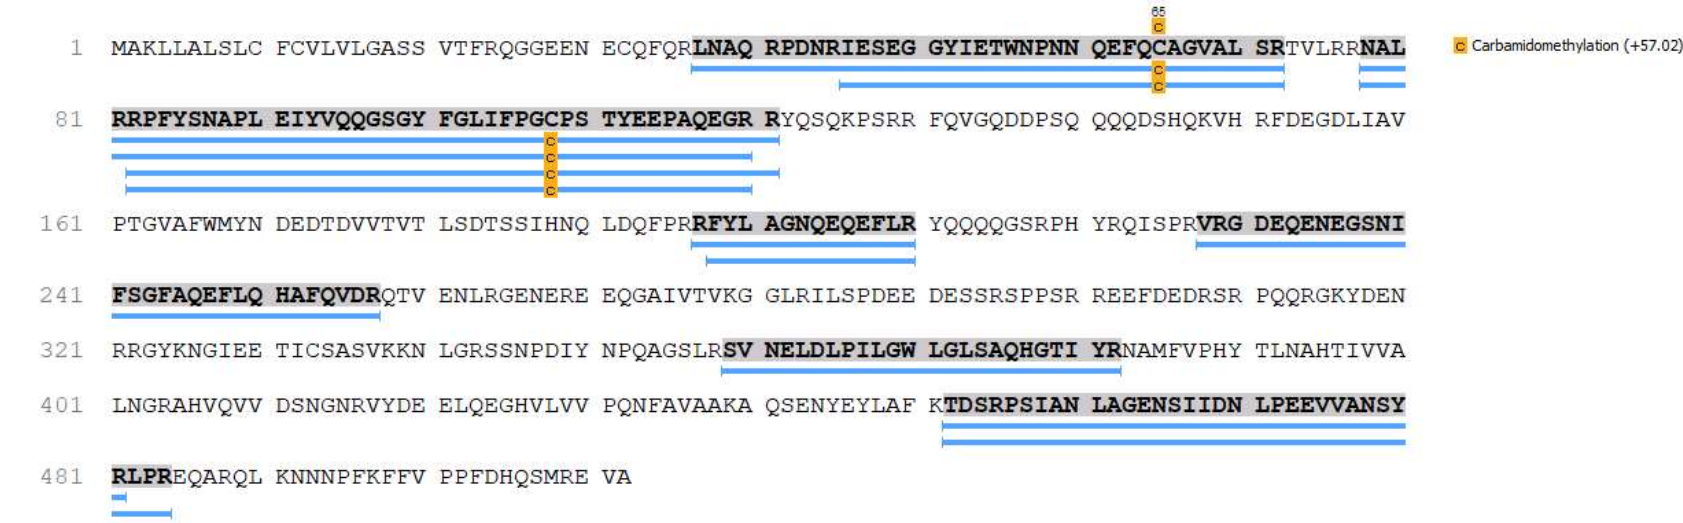

Supporting Peptides:

| Peptide                            | Uniq | -10lgP | Mass      | Length | ppm | m/z       | z | RT    | Fraction | Scan     | Source File       | Area Roast Ara h 3 | #Feature | #Feature Roast Ara h 3 | Start | End | PTM | AScore | Found By |
|------------------------------------|------|--------|-----------|--------|-----|-----------|---|-------|----------|----------|-------------------|--------------------|----------|------------------------|-------|-----|-----|--------|----------|
| R.FYLAGNQEQEFLR.Y                  | Y    | 135.23 | 1613.7837 | 13     | 0.1 | 807.8992  | 2 | 32.67 | 7        | F7:1561  | OB5951 H3A Ro.raw | 5.1792E4           | 4        | 4                      | 198   | 210 |     |        | PEAKS DB |
| K.TDSRPSIANLAGENSIIDNLPEEVVANSYR.L | Y    | 112.03 | 3243.6006 | 30     | 0.9 | 1082.2107 | 3 | 36.51 | 11       | F11:1779 | OB5948 H3B Ro.raw | 3.6943E5           | 4        | 4                      | 452   | 481 |     |        | PEAKS DB |

|                   |
|-------------------|
| total 15 peptides |
|-------------------|

| Peptide                                                   | Uniq | -10lgP | Mass      | Length | ppm  | m/z       | z | RT    | Fraction | Scan     | Source File       | Area Roast Ara h 3 | #Feature | #Feature Roast Ara h 3 | Start | End | PTM                  | AScore                                                      | Found By |
|-----------------------------------------------------------|------|--------|-----------|--------|------|-----------|---|-------|----------|----------|-------------------|--------------------|----------|------------------------|-------|-----|----------------------|-------------------------------------------------------------|----------|
| R.SVNELDLPILGWLGLSAQHGTIYR.N                              | Y    | 105.06 | 2651.4070 | 24     | 0.2  | 884.8116  | 3 | 40.31 | 11       | F11:1994 | OB5948 H3B Ro.raw | 2.2662E6           | 12       | 12                     | 359   | 382 |                      |                                                             | PEAKS DB |
| R.LNAQRPDNRIESEGgyIETWNPNNQEFQC(+57.02)AGVALSR.T          | Y    | 102.77 | 4132.9409 | 36     | -0.3 | 1034.2444 | 4 | 33.64 | 11       | F11:1603 | OB5948 H3B Ro.raw | 1.9614E7           | 8        | 8                      | 37    | 72  | Carbamidomethylation | C29:Carbamidomethylation:1000.00                            | PEAKS DB |
| R.RFYLAGNQEQEFLR.Y                                        | Y    | 74.35  | 1769.8849 | 14     | -1.3 | 590.9681  | 3 | 31.33 | 7        | F7:1486  | OB5951 H3A Ro.raw | 6.7764E4           | 3        | 3                      | 197   | 210 |                      |                                                             | PEAKS DB |
| R.VRGDEQENEGSNIFSGFAQEFLQHAFQVDR.Q                        | Y    | 69.72  | 3453.5974 | 30     | 4.1  | 864.4102  | 4 | 39.78 | 9        | F9:1952  | OB5953 H3A Ro.raw | 3.9334E5           | 2        | 2                      | 228   | 257 |                      |                                                             | PEAKS DB |
| R.RPFYSNAPLEIYVQGGSGYFGLIFPGC(+57.02)PSTYEPAQEGR.R        | Y    | 67.79  | 4424.0845 | 39     | 5.3  | 1475.7100 | 3 | 38.84 | 8        | F8:1912  | OB5952 H3A Ro.raw | 1.5644E6           | 3        | 3                      | 82    | 120 | Carbamidomethylation | C27:Carbamidomethylation:1000.00                            | PEAKS DB |
| R.RPFYSNAPLEIYVQGGSGYFGLIFPGC(+57.02)PSTYEPAQEGRR.Y       | Y    | 58.89  | 4580.1860 | 40     | 3.1  | 1146.0574 | 4 | 38.30 | 8        | F8:1880  | OB5952 H3A Ro.raw | 1.9768E5           | 1        | 1                      | 82    | 121 | Carbamidomethylation | C27:Carbamidomethylation:1000.00                            | PEAKS DB |
| R.NALRRPFYSNAPLEIYVQGGSGYFGLIFPGC(+57.02)PSTYEPAQEGR.R    | Y    | 47.55  | 4878.3501 | 43     | 2.7  | 1220.5981 | 4 | 38.66 | 9        | F9:1897  | OB5953 H3A Ro.raw | 5.9202E5           | 2        | 2                      | 78    | 120 | Carbamidomethylation | C31:Carbamidomethylation:1000.00                            | PEAKS DB |
| K.TDSRPSIANLAGENSIIDNLPEEVVANSYRLPR.E                     | Y    | 45.23  | 3609.8386 | 33     | 2.2  | 903.4689  | 4 | 36.50 | 7        | F7:1770  | OB5951 H3A Ro.raw | 5.4722E5           | 3        | 3                      | 452   | 484 |                      |                                                             | PEAKS DB |
| R.RPFYSNAPLEIYVQGGSGYFGLIFPGC(+57.02)PSTYEPAQ(+.98)EGRR.Y | Y    | 43.08  | 4581.1699 | 40     | 9.6  | 1146.3108 | 4 | 38.25 | 9        | F9:1866  | OB5953 H3A Ro.raw | 4.8906E5           | 2        | 2                      | 82    | 121 | Carbamidomethylation | C27:Carbamidomethylation:1000.00;Q36:Deamidation (NQ):12.58 | PEAKS DB |
| R.LNAQRPDNRIESEGgyIETWN(+.98)PNNQEFQC(+57.02)AGVALSR.T    | Y    | 33.79  | 4133.9248 | 36     | -0.7 | 1034.4878 | 4 | 43.56 | 8        | F8:2183  | OB5952 H3A Ro.raw | 0                  | 0        | 0                      | 37    | 72  | Carbamidomethylation | N21:Deamidation (NQ):7.58;C29:Carbamidomethylation:1000.00  | PEAKS DB |
| R.IESEGGYIETWNPNNQEFQC(+57.02)AGVALSR.T                   | N    | 33.38  | 3068.3933 | 27     | 2.9  | 1535.2084 | 2 | 34.64 | 8        | F8:1684  | OB5952 H3A Ro.raw | 7.7336E3           | 1        | 1                      | 46    | 72  | Carbamidomethylation | C20:Carbamidomethylation:1000.00                            | PEAKS DB |
| R.NALRRPFYSNAPLEIYVQGGSGYFGLIFPGC(+57.02)PSTYEPAQEGRR.Y   | Y    | 31.63  | 5034.4512 | 44     | 1.2  | 1259.6216 | 4 | 37.82 | 7        | F7:1841  | OB5951 H3A Ro.raw | 8.5213E5           | 1        | 1                      | 78    | 121 | Carbamidomethylation | C31:Carbamidomethylation:1000.00                            | PEAKS DB |
| R.LNAQRPDNRIESEGgyIETWNPNN(+.98)QEFQC(+57.02)AGVALSR.T    | Y    | 30.18  | 4133.9248 | 36     | 3.3  | 1378.9868 | 3 | 34.37 | 12       | F12:1670 | OB5949 H3B Ro.raw | 2.7728E4           | 1        | 1                      | 37    | 72  | Carbamidomethylation | N24:Deamidation (NQ):0.00;C29:Carbamidomethylation:1000.00  | PEAKS DB |
| total 15 peptides                                         |      |        |           |        |      |           |   |       |          |          |                   |                    |          |                        |       |     |                      |                                                             |          |

E9LFE9|E9LFE9\_ARAHY

back to list

| Protein Coverage | Supporting Peptides |

Protein Coverage:

1 MGKPVIKPLV VLLLSLILVS ECAAHSQKR RMGQRVKLSL EECGELEKLE AIEPDYYRIE AEGGVTESWN HTNKMRLCAG

81 VALVRRTVKP GGLVLPSYTN APQLMYVVG SGIQGMTIFP SCPESEFEEPE EAGQEYREQH QKVHEIRGGD IIAIPAGIGY

161 WFYNNGDVPL VVVILLHTNN VANQLGTLPR RFYIAGNTED EHGEGRREKS ISGRNVFSGI SLNLLAQVFG VRVETARKIQ

241 GPDDKRKNIV MVGGRS

Supporting Peptides:



| Peptide                                              | Uniq | -10lgP | Mass      | Length | ppm  | m/z       | z | RT    | Fraction | Scan     | Source File       | Area Roast Ara h 3 | #Feature | #Feature Roast Ara h 3 | Start | End | PTM                                 | AScore                                         | Found By  |
|------------------------------------------------------|------|--------|-----------|--------|------|-----------|---|-------|----------|----------|-------------------|--------------------|----------|------------------------|-------|-----|-------------------------------------|------------------------------------------------|-----------|
| R.NVFSGISLNLLAQVFGVR.V                               | Y    | 158.60 | 1933.0785 | 18     | 0.8  | 967.5493  | 2 | 42.42 | 11       | F11:2125 | OB5948 H3B Ro.raw | 1.2301E5           | 3        | 3                      | 215   | 232 |                                     |                                                | PEAKS DB  |
| R.NVFSGISLNLLAQVFGVRVETAR.K                          | Y    | 90.51  | 2489.3755 | 23     | 0.2  | 830.8013  | 3 | 41.58 | 10       | F10:1917 | OB5926 H3B Ro.raw | 1.1995E6           | 5        | 5                      | 215   | 237 |                                     |                                                | PEAKS DB  |
| N.V(+127.06)FSGISLNLLAQVFGVR.V                       | Y    | 49.60  | 1946.0989 | 17     | -9.4 | 974.0475  | 2 | 41.23 | 12       | F12:2066 | OB5949 H3B Ro.raw | 5.4396E5           | 2        | 2                      | 216   | 232 | N-Succinimidyl-2-morpholine acetate | V1:N-Succinimidyl-2-morpholine acetate:1000.00 | PEAKS PTM |
| R.GGDIIAIPAGIGYWFYN(+.98)NGDVPLVVILLHTNNVANQLGTLPR.R | Y    | 32.90  | 4574.4326 | 43     | 7.1  | 1525.8328 | 3 | 44.05 | 10       | F10:2070 | OB5926 H3B Ro.raw | 3.5735E4           | 1        | 1                      | 148   | 190 |                                     | N17:Deamidation (NQ):30.46                     | PEAKS DB  |
| total 4 peptides                                     |      |        |           |        |      |           |   |       |          |          |                   |                    |          |                        |       |     |                                     |                                                |           |

A5Z1R0|A5Z1R0\_ARAHY

[back to list](#)

| [Protein Coverage](#) | [Supporting Peptides](#) |

Protein Coverage:

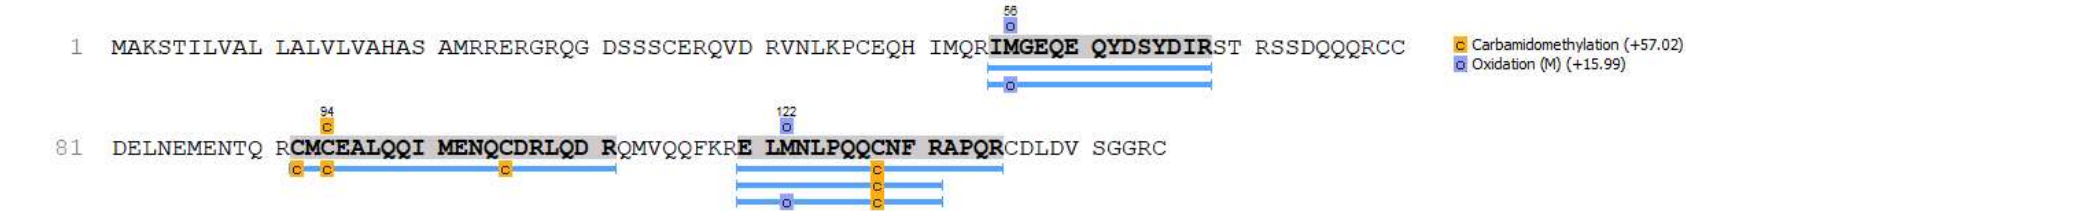

Supporting Peptides:

| Peptide                                                | Uniq | -10lgP | Mass      | Length | ppm  | m/z      | z | RT    | Fraction | Scan     | Source File       | Area Roast Ara h 3 | #Feature | #Feature Roast Ara h 3 | Start | End | PTM                                 | AScore                                                                                                                    | Found By |
|--------------------------------------------------------|------|--------|-----------|--------|------|----------|---|-------|----------|----------|-------------------|--------------------|----------|------------------------|-------|-----|-------------------------------------|---------------------------------------------------------------------------------------------------------------------------|----------|
| R.ELMNLPQQC(+57.02)NFR.A                               | Y    | 130.50 | 1548.7177 | 12     | -0.7 | 775.3672 | 2 | 31.27 | 11       | F11:1474 | OB5948 H3B Ro.raw | 5.3223E4           | 6        | 6                      | 120   | 131 | Carbamidomethylation                | C9:Carbamidomethylation:1000.00                                                                                           | PEAKS DB |
| R.IM(+15.99)GEQEYDSYDIR.S                              | Y    | 103.58 | 1761.7516 | 14     | -1.0 | 881.8840 | 2 | 28.71 | 11       | F11:1332 | OB5948 H3B Ro.raw | 1.9449E4           | 4        | 4                      | 55    | 68  | Oxidation (M)                       | M2:Oxidation (M):1000.00                                                                                                  | PEAKS DB |
| R.IMGEQEYDSYDIR.S                                      | Y    | 90.26  | 1745.7566 | 14     | -1.3 | 873.8866 | 2 | 30.26 | 10       | F10:1263 | OB5926 H3B Ro.raw | 4.6099E4           | 5        | 5                      | 55    | 68  |                                     |                                                                                                                           | PEAKS DB |
| R.ELM(+15.99)NLPQQC(+57.02)NFR.A                       | Y    | 71.68  | 1564.7126 | 12     | -2.7 | 783.3632 | 2 | 28.90 | 11       | F11:1336 | OB5948 H3B Ro.raw | 7.1508E3           | 3        | 3                      | 120   | 131 | Oxidation (M); Carbamidomethylation | M3:Oxidation (M):1000.00;C9:Carbamidomethylation:1000.00                                                                  | PEAKS DB |
| R.ELMNLPQQC(+57.02)NFRAPQR.C                           | Y    | 70.25  | 2000.9673 | 16     | 0.2  | 667.9965 | 3 | 30.17 | 9        | F9:1409  | OB5953 H3A Ro.raw | 7.0151E3           | 3        | 3                      | 120   | 135 | Carbamidomethylation                | C9:Carbamidomethylation:1000.00                                                                                           | PEAKS DB |
| R.C(+57.02)MC(+57.02)EALQQIMENQC(+57.02)DRLQDR.Q       | Y    | 43.12  | 2597.0913 | 20     | 1.2  | 866.7054 | 3 | 33.96 | 8        | F8:1628  | OB5952 H3A Ro.raw | 1.1224E4           | 1        | 1                      | 92    | 111 | Carbamidomethylation                | C1:Carbamidomethylation:1000.00;C3:Carbamidomethylation:1000.00;C14:Carbamidomethylation:1000.00                          | PEAKS DB |
| R.C(+57.02)MC(+57.02)EALQQ(+.98)IMENQC(+57.02)DRLQDR.Q | Y    | 37.92  | 2598.0754 | 20     | -8.3 | 867.0270 | 3 | 33.99 | 11       | F11:1638 | OB5948 H3B Ro.raw | 0                  | 0        | 0                      | 92    | 111 | Carbamidomethylation                | C1:Carbamidomethylation:1000.00;C3:Carbamidomethylation:1000.00;Q8:Deamidation (NQ):0.00;C14:Carbamidomethylation:1000.00 | PEAKS DB |
| R.IM(+15.99)GEQ(+.98)EQYDSYDIR.S                       | Y    | 34.46  | 1762.7356 | 14     | 4.0  | 882.3805 | 2 | 28.56 | 11       | F11:1318 | OB5948 H3B Ro.raw | 0                  | 0        | 0                      | 55    | 68  | Oxidation (M)                       | M2:Oxidation (M):1000.00;Q5:Deamidation (NQ):0.00                                                                         | PEAKS DB |
| total 8 peptides                                       |      |        |           |        |      |          |   |       |          |          |                   |                    |          |                        |       |     |                                     |                                                                                                                           |          |

sp|Q647G9|CONG\_ARAHY

[back to list](#)

| [Protein Coverage](#) | [Supporting Peptides](#) |

Protein Coverage:

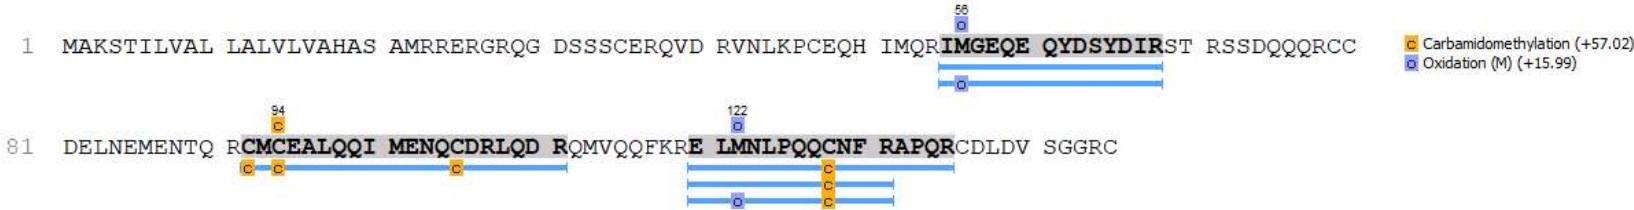

Supporting Peptides:

| Peptide                                                | Uniq | -10lgP | Mass      | Length | ppm  | m/z      | z | RT    | Fraction | Scan     | Source File       | Area Roast Ara h 3 | #Feature | #Feature Roast Ara h 3 | Start | End | PTM                                 | AScore                                                                                                                    | Found By |
|--------------------------------------------------------|------|--------|-----------|--------|------|----------|---|-------|----------|----------|-------------------|--------------------|----------|------------------------|-------|-----|-------------------------------------|---------------------------------------------------------------------------------------------------------------------------|----------|
| R,ELMNLPQQC(+57.02)NFR,A                               | Y    | 130.50 | 1548.7177 | 12     | -0.7 | 775.3672 | 2 | 31.27 | 11       | F11:1474 | OB5948 H3B Ro.raw | 5.3223E4           | 6        | 6                      | 120   | 131 | Carbamidomethylation                | C9:Carbamidomethylation:1000.00                                                                                           | PEAKS DB |
| R,IM(+15.99)GEQEYDSYDIR,S                              | Y    | 103.58 | 1761.7516 | 14     | -1.0 | 881.8840 | 2 | 28.71 | 11       | F11:1332 | OB5948 H3B Ro.raw | 1.9449E4           | 4        | 4                      | 55    | 68  | Oxidation (M)                       | M2:Oxidation (M):1000.00                                                                                                  | PEAKS DB |
| R,IMGEQEYDSYDIR,S                                      | Y    | 90.26  | 1745.7566 | 14     | -1.3 | 873.8866 | 2 | 30.26 | 10       | F10:1263 | OB5926 H3B Ro.raw | 4.6099E4           | 5        | 5                      | 55    | 68  |                                     |                                                                                                                           | PEAKS DB |
| R,ELM(+15.99)NLPQQC(+57.02)NFR,A                       | Y    | 71.68  | 1564.7126 | 12     | -2.7 | 783.3632 | 2 | 28.90 | 11       | F11:1336 | OB5948 H3B Ro.raw | 7.1508E3           | 3        | 3                      | 120   | 131 | Oxidation (M); Carbamidomethylation | M3:Oxidation (M):1000.00;C9:Carbamidomethylation:1000.00                                                                  | PEAKS DB |
| R,ELMNLPQQC(+57.02)NFRAPQR,C                           | Y    | 70.25  | 2000.9673 | 16     | 0.2  | 667.9965 | 3 | 30.17 | 9        | F9:1409  | OB5953 H3A Ro.raw | 7.0151E3           | 3        | 3                      | 120   | 135 | Carbamidomethylation                | C9:Carbamidomethylation:1000.00                                                                                           | PEAKS DB |
| R,C(+57.02)MC(+57.02)EALQQIMENQC(+57.02)DRLQDR,Q       | Y    | 43.12  | 2597.0913 | 20     | 1.2  | 866.7054 | 3 | 33.96 | 8        | F8:1628  | OB5952 H3A Ro.raw | 1.1224E4           | 1        | 1                      | 92    | 111 | Carbamidomethylation                | C1:Carbamidomethylation:1000.00;C3:Carbamidomethylation:1000.00;C8:Deamidation (NQ):0.00;C14:Carbamidomethylation:1000.00 | PEAKS DB |
| R,C(+57.02)MC(+57.02)EALQQ(+.98)IMENQC(+57.02)DRLQDR,Q | Y    | 37.92  | 2598.0754 | 20     | -8.3 | 867.0270 | 3 | 33.99 | 11       | F11:1638 | OB5948 H3B Ro.raw | 0                  | 0        | 0                      | 92    | 111 | Carbamidomethylation                | C1:Carbamidomethylation:1000.00;C3:Carbamidomethylation:1000.00;Q8:Deamidation (NQ):0.00;C14:Carbamidomethylation:1000.00 | PEAKS DB |
| R,IM(+15.99)GEQ(+.98)EQYDSYDIR,S                       | Y    | 34.46  | 1762.7356 | 14     | 4.0  | 882.3805 | 2 | 28.56 | 11       | F11:1318 | OB5948 H3B Ro.raw | 0                  | 0        | 0                      | 55    | 68  | Oxidation (M)                       | M2:Oxidation (M):1000.00;Q5:Deamidation (NQ):0.00                                                                         | PEAKS DB |

total 8 peptides

#CONTAM#P04264

[back to list](#)

| [Protein Coverage](#) | [Supporting Peptides](#) |

Protein Coverage:

1 MSRQFSSRSQ YRSGGGFSSG SAGIINYQRR TTSSSTRRSQ GGGGRFSSCG GGGGSFGAGG GFGSRSLVNL GGSKSISSIV  
81 ARGGGRGSGF GGGYGGGGFG GGGFGGGGFG GGGIGGGGFG GFGSGGGGFG GGGFGGGGYG GGYGPVCPPG GIQEVNTINQS  
161 LLQPLNVEID PEIQKVKRSR REQIKSLNNQ FASFIDKVRF LEQQNQVLQT KWELLQQVDT STRTHNLEPY FESFINNLRR  
241 RVDQLKSDQS RLDSELKNMQ DMVEDYRNKY EDEINKRTNA ENEFVTIKKD VDGAYMTKVD LQAKLDNLQQ EIDFLTALYQ  
321 AELSQMOTQI SETNVILSMD NNRSLDLD SI AEVKAQNE D IAQSKAEAE SLYQSKYEEL QITAGRHGDS VRNSKIEISE  
401 LNRVIQRLRS EIDNVKKQIS NLQQSISDAE QRGENALKDA KNKLDLEDA LQQAKEDLAR LLRDYQELMN TKLALDLEIA  
481 TYRTLLEGEE SRMSGECAPN VSVSVSTSH TISGGGSRGG GGGGYGSGGS SYGSGGGSYG SGGGGGGGRG SYGSGGSSYG  
561 SGGGSYGSGG GGGGHGSYGS GSSSGGYRGG SGGGGGGSSG GRGSGGGSSG GSIGGRGSSS GGVKSSGGSS SVRFVSTTYS  
641 GVTR

Supporting Peptides:

| Peptide                      | Uniq | -10lgP | Mass      | Length | ppm | m/z      | z | RT    | Fraction | Scan     | Source File       | Area Roast Ara h 3 | #Feature | #Feature Roast Ara h 3 | Start | End | PTM | AScore | Found By |
|------------------------------|------|--------|-----------|--------|-----|----------|---|-------|----------|----------|-------------------|--------------------|----------|------------------------|-------|-----|-----|--------|----------|
| R.SLDLSIIAEVK.A              | N    | 117.78 | 1301.7078 | 12     | 1.0 | 651.8618 | 2 | 36.11 | 7        | F7:1758  | OB5951 H3A Ro.raw | 8.8459E4           | 3        | 3                      | 344   | 355 |     |        | PEAKS DB |
| R.FLEQQNQVLQTKWELLQQVDTSTR.T | Y    | 74.98  | 2931.5090 | 24     | 1.7 | 978.1786 | 3 | 35.80 | 12       | F12:1751 | OB5949 H3B Ro.raw | 1.6833E5           | 3        | 3                      | 200   | 223 |     |        | PEAKS DB |
| K.SLNNQFASIDKVR.F            | Y    | 66.52  | 1637.8525 | 14     | 2.9 | 819.9359 | 2 | 33.55 | 7        | F7:1610  | OB5951 H3A Ro.raw | 1.4106E4           | 2        | 2                      | 186   | 199 |     |        | PEAKS DB |
| R.THNLEPYFESFINNLRR.R        | Y    | 56.37  | 2149.0703 | 17     | 1.7 | 717.3652 | 3 | 37.33 | 8        | F8:1829  | OB5952 H3A Ro.raw | 1.0967E4           | 1        | 1                      | 224   | 240 |     |        | PEAKS DB |
| total 4 peptides             |      |        |           |        |     |          |   |       |          |          |                   |                    |          |                        |       |     |     |        |          |

sp|Q647H2|AHY3\_ARAHY

[back to list](#)

| [Protein Coverage](#) | [Supporting Peptides](#) |

Protein Coverage:

1 MAKLLALSVC FCFVLVGASS VTFRQQGEEN ECQFQRLNAQ RPDNCIESEG GYIETWNPNN QEFQACAGVAL SRFVLRRNAL

81 RRPFFYSNAPQ EIFIYQSGSY FGLIFPGCPG TFEEPIQSE QFQRPSPRHFQ QGDQSQRPLD THQKVHGFRE GDLIAVPHGV

161 AFWIYNDQDT DVVAISVLHT NSLHNQLDQF PRRFNLAGKQ EQEFLRYQQR SGRQSPKGEE QEQQEQENEGG NVFSGFSTEF

241 LSHGFQVNED IVRNLRGENE REEQGAIVTV KGGLSILVPP EWRQSYQQPG RGDKDFNNGI EETICTATVK MNIGKSTSAD

321 IYNPQAGSVR TVNELDLPIL NRLGLSAEYG SIHRDAMFVP HYNMNSMI YALHGGAHVQ VVDCNGNRVF DEELQEQGSL

401 VVPQNFATAA KSQSEHFLYV AFKTNRSASI SNLAGKNSYM WNLPEDEVAN SYGLQYEQAR QLKNNNPFTF LVPPQDSQMI

481 RTVA

Supporting Peptides:

| Peptide                                  | Uniq | -10lgP | Mass      | Length | ppm  | m/z       | z | RT    | Fraction | Scan     | Source File       | Area Roast Ara h 3 | #Feature | #Feature Roast Ara h 3 | Start | End | PTM                  | AScore                           | Found By |
|------------------------------------------|------|--------|-----------|--------|------|-----------|---|-------|----------|----------|-------------------|--------------------|----------|------------------------|-------|-----|----------------------|----------------------------------|----------|
| R.TVNELDLPILNR.L                         | Y    | 118.58 | 1395.7721 | 12     | 2.1  | 698.8948  | 2 | 34.42 | 9        | F9:1647  | OB5953 H3A Ro.raw | 1.472E5            | 4        | 4                      | 331   | 342 |                      |                                  | PEAKS DB |
| R.RFNLAGKQEFLR.Y                         | Y    | 68.54  | 1734.9165 | 14     | -2.6 | 579.3125  | 3 | 31.75 | 11       | F11:1467 | OB5948 H3B Ro.raw | 2.3357E5           | 2        | 2                      | 193   | 206 |                      |                                  | PEAKS DB |
| R.FNLAGKQEFLR.Y                          | Y    | 59.79  | 1578.8154 | 13     | -2.4 | 790.4151  | 2 | 31.75 | 10       | F10:1357 | OB5926 H3B Ro.raw | 0                  | 0        | 0                      | 194   | 206 |                      |                                  | PEAKS DB |
| C.IESEG GYIETWNPNNQEFQC(+57.02)AGVALSR.F | N    | 33.38  | 3068.3933 | 27     | 2.9  | 1535.2084 | 2 | 34.64 | 8        | F8:1684  | OB5952 H3A Ro.raw | 7.7336E3           | 1        | 1                      | 46    | 72  | Carbamidomethylation | C20:Carbamidomethylation:1000.00 | PEAKS DB |
| total 4 peptides                         |      |        |           |        |      |           |   |       |          |          |                   |                    |          |                        |       |     |                      |                                  |          |

#CONTAM#P13645

[back to list](#)



| [Protein Coverage](#) | [Supporting Peptides](#) |

Protein Coverage:

1 MSVRYSSSKH YSSSRSGGGG GGGGCGGGGG VSSLRISSSK GSLGGGFSSG GFSGGSFSRG SSGGGCFGGS SGGYGGLGGF

81 GGSFGRGSYG SSSFGGSYGG SFGGGSFGGG SFGGGSFGGG GFGGGGFGGG FGGGFGGDGG LLSGNEK**VTM QNLNDRLAS**

Oxidation (M) (+15.99)

161 **LDKVR**ALEES NYELEGKIKE WYEKHGNSHQ GEPRDYSKY **KTIDDLKNQI LNLTTDNANI LLQIDNARLA** ADDFRLKYEN

241 EVALRQSV EA DINGLRRVLD ELTLTKADLE MQIESLTEEL AYLKKNHEEE MKDLR**NVSTG DVNVEMNAAP GVDLTQLLNN**

321 **MRSQ**YEQLA E QNRKDAAWF NEKSKELTTE IDNNIEQISS YKSEITELRR **NVQALEIELQ SQLALK**QSLE ASLAETEGRY

401 CVQLS**QIQ**AQ ISALEEQ**LQ**Q IRAETECQNT EYQQLLDIKI RLENEIQTYR SLLEGE**GSSG** GGGRG**GSFG** GGYGGG**S**SGG

481 GSSGGG**Y**GGG HGGSSGGG**Y**G GGSSGGG**S**SG GGYGGG**S**SGG GHGGG**S**SGG HGGSSGG**Y**G GGSSGGG**G**GG YGGG**S**SGG**S**

561 SSGGGYGGGS SSGGHKSSSS GSVGESSSKG PRY

Supporting Peptides:

| Peptide                                        | Uniq | -10lgP | Mass      | Length | ppm | m/z       | z | RT    | Fraction | Scan    | Source File          | Area Roast<br>Ara h 3 | #Feature | #Feature Roast<br>Ara h 3 | Start | End | PTM              | AScore                                               | Found<br>By |
|------------------------------------------------|------|--------|-----------|--------|-----|-----------|---|-------|----------|---------|----------------------|-----------------------|----------|---------------------------|-------|-----|------------------|------------------------------------------------------|-------------|
| K.TIDDLKNQILNLTTDNANILLQIDNAR.L                | Y    | 117.47 | 3051.6201 | 27     | 2.8 | 1018.2168 | 3 | 38.78 | 7        | F7:1915 | OB5951 H3A<br>Ro.raw | 1.093E6               | 6        | 6                         | 202   | 228 |                  |                                                      | PEAKS<br>DB |
| R.NVQALEIELQSQLALK.Q                           | Y    | 59.81  | 1796.0043 | 16     | 1.5 | 899.0108  | 2 | 36.15 | 9        | F9:1759 | OB5953 H3A<br>Ro.raw | 2.0759E4              | 1        | 1                         | 371   | 386 |                  |                                                      | PEAKS<br>DB |
| K.VTMQNLNDRLASYLDKVR.A                         | Y    | 59.53  | 2135.1157 | 18     | 2.1 | 712.7140  | 3 | 35.40 | 8        | F8:1723 | OB5952 H3A<br>Ro.raw | 1.7452E4              | 1        | 1                         | 148   | 165 |                  |                                                      | PEAKS<br>DB |
| R.NVSTGDEVN(+.98)VEM(+15.99)NAAPGVDLTQLLNNMR.S | Y    | 34.11  | 2888.3645 | 27     | 6.9 | 1445.1995 | 2 | 37.14 | 9        | F9:1809 | OB5953 H3A<br>Ro.raw | 0                     | 0        | 0                         | 296   | 322 | Oxidation<br>(M) | N8:Deamidation (NQ):2.37;M11:<br>Oxidation (M):55.60 | PEAKS<br>DB |
| total 4 peptides                               |      |        |           |        |     |           |   |       |          |         |                      |                       |          |                           |       |     |                  |                                                      |             |

E5FHZ1|E5FHZ1\_ARAHY

[back to list](#)

| [Protein Coverage](#) | [Supporting Peptides](#) |

Protein Coverage:

1 MSQEQHRRPE ESDPIKYGDV FNVSGELAQK PVKPEDAAMM QSAETRVLGK TQPGGAAAAM QSAATLNEQA GLVGHHDVNE

81 VAGDRGVTVT DMQAPGRR**IV TESVGGQVVG QYVEPTPVQS SRASAVRESA ITIGEAL EAT AQTVGSKPVE QSDAAAIQAA**

161 **EVR**ATGSNVI QPGGLAAMAQ SAVAFNAGCR NPRDKIKLAD ILTGATAKLP ADKAATHQGC

Supporting Peptides:

| Peptide                                   | Uniq | -10lgP | Mass      | Length | ppm | m/z       | z | RT    | Fraction | Scan    | Source File          | Area Roast<br>Ara h 3 | #Feature | #Feature Roast<br>Ara h 3 | Start | End | PTM | AScore                    | Found<br>By |
|-------------------------------------------|------|--------|-----------|--------|-----|-----------|---|-------|----------|---------|----------------------|-----------------------|----------|---------------------------|-------|-----|-----|---------------------------|-------------|
| R.IVTESVGGQVVGQYVEPTPVQSSR.A              | Y    | 117.93 | 2515.2917 | 24     | 3.8 | 1258.6580 | 2 | 31.22 | 7        | F7:1476 | OB5951 H3A<br>Ro.raw | 3.0299E4              | 1        | 1                         | 99    | 122 |     |                           | PEAKS<br>DB |
| R.ESAITIGEAL EATAQTVGSKPVEQSDAAAIQAAEVR.A | Y    | 91.05  | 3610.8325 | 36     | 2.4 | 1204.6210 | 3 | 35.92 | 7        | F7:1740 | OB5951 H3A<br>Ro.raw | 8.9254E5              | 3        | 3                         | 128   | 163 |     |                           | PEAKS<br>DB |
| R.IVTESVGGQVVGQYVEPTPVQ(+.98)SSR.A        | Y    | 42.31  | 2516.2759 | 24     | 9.4 | 1259.1571 | 2 | 31.76 | 8        | F8:1505 | OB5952 H3A<br>Ro.raw | 2.7069E4              | 1        | 1                         | 99    | 122 |     | Q21:Deamidation (NQ):0.00 | PEAKS<br>DB |
| total 3 peptides                          |      |        |           |        |     |           |   |       |          |         |                      |                       |          |                           |       |     |     |                           |             |

N1NKG9|N1NKG9\_ARAHY

[back to list](#)

| [Protein Coverage](#) | [Supporting Peptides](#) |

Protein Coverage:

1 MSQEQHRRPE ESDPIKYGDV FNVSGELAQK PVKPEDAAMM QSAETRVLGK TQPGGAAAAM QSAATLNEQA GLVGHHDVNE  
81 VAGDRGVTVT DMQAPGRRIV TESVGGQVVG QYVEPTPVQS SRSAVR**ESA** ITIGEAL**EA**T AQTVGSKPVE QSDAAAIQAA  
161 **EVR**ATGSNVI QPGGLAAMAQ SAVAFNAGCR NPRDKIKLAD ILTGATAKLP ADKAATHQDA EGVASAEARN NTGGTTPGGV  
241 AASVAAAARL NENVNV

Supporting Peptides:

| Peptide                                           | Uniq | -10lgP | Mass      | Length | ppm | m/z       | z | RT    | Fraction | Scan    | Source File       | Area Roast Ara h 3 | #Feature | #Feature Roast Ara h 3 | Start | End | PTM | AScore                    | Found By |
|---------------------------------------------------|------|--------|-----------|--------|-----|-----------|---|-------|----------|---------|-------------------|--------------------|----------|------------------------|-------|-----|-----|---------------------------|----------|
| R.IVTESVGGQVVGQYVEPTPVQSSR.A                      | Y    | 117.93 | 2515.2917 | 24     | 3.8 | 1258.6580 | 2 | 31.22 | 7        | F7:1476 | OB5951 H3A Ro.raw | 3.0299E4           | 1        | 1                      | 99    | 122 |     |                           | PEAKS DB |
| R.ESAITIGEAL <b>E</b> ATAQTVGSKPVEQSDAAAIQAAEVR.A | Y    | 91.05  | 3610.8325 | 36     | 2.4 | 1204.6210 | 3 | 35.92 | 7        | F7:1740 | OB5951 H3A Ro.raw | 8.9254E5           | 3        | 3                      | 128   | 163 |     |                           | PEAKS DB |
| R.IVTESVGGQVVGQYVEPTPVQ(+.98)SSR.A                | Y    | 42.31  | 2516.2759 | 24     | 9.4 | 1259.1571 | 2 | 31.76 | 8        | F8:1505 | OB5952 H3A Ro.raw | 2.7069E4           | 1        | 1                      | 99    | 122 |     | Q21:Deamidation (NQ):0.00 | PEAKS DB |
| total 3 peptides                                  |      |        |           |        |     |           |   |       |          |         |                   |                    |          |                        |       |     |     |                           |          |

sp|Q6PSU2|CONG7\_ARAHY

[back to list](#)

| [Protein Coverage](#) | [Supporting Peptides](#) |

Protein Coverage:

1 MAKLTILVAL ALFLAAHAS **ARQQWELQGD** RRCQSQLERA **NLRPCEQHLM** QKIQRDEDSY GRDPYSPSQD PYSPSQDPDR

81 RDPYSPSPYD RRGAGSSQHQ **ERCCNELNEF ENNQRCMCEA** LQQIMENQSD **RLQGRQ**QEQQ FKRELRNLPQ QCGLRAPQRC

161 DLEVESGGRD RY

103.04 116 118

Ammonia-loss (C@N-term) (-17.03)  
Carbamidomethylation (+57.02)  
Oxidation (M) (+15.99)

Supporting Peptides:

| Peptide                                                  | Uniq | -10lgP | Mass      | Length | ppm  | m/z      | z | RT    | Fraction | Scan     | Source File       | Area Roast Ara h 3 | #Feature | #Feature Roast Ara h 3 | Start | End | PTM                                 | AScore                                                                                                             | Found By |
|----------------------------------------------------------|------|--------|-----------|--------|------|----------|---|-------|----------|----------|-------------------|--------------------|----------|------------------------|-------|-----|-------------------------------------|--------------------------------------------------------------------------------------------------------------------|----------|
| R.C(+57.02)MC(+57.02)EALQQIMENQSDRLQGR.Q                 | Y    | 92.60  | 2466.0872 | 20     | -1.5 | 823.0369 | 3 | 34.04 | 11       | F11:1630 | OB5948 H3B Ro.raw | 6.8502E5           | 4        | 4                      | 116   | 135 | Carbamidomethylation                | C1:Carbamidomethylation:1000.00;C3:Carbamidomethylation:1000.00                                                    | PEAKS DB |
| R.C(+57.02)M(+15.99)C(+57.02)EALQQIMENQSDRLQGR.Q         | Y    | 75.48  | 2482.0820 | 20     | -1.3 | 828.3687 | 3 | 32.12 | 11       | F11:1531 | OB5948 H3B Ro.raw | 1.478E5            | 2        | 2                      | 116   | 135 | Carbamidomethylation; Oxidation (M) | C1:Carbamidomethylation:1000.00;M2:Oxidation (M):97.31;C3:Carbamidomethylation:1000.00                             | PEAKS DB |
| R.C(+57.02)C(+57.02)NELNEFENNQR.C                        | Y    | 67.01  | 1725.6835 | 13     | 1.3  | 863.8519 | 2 | 28.51 | 11       | F11:1322 | OB5948 H3B Ro.raw | 3.7158E3           | 1        | 1                      | 103   | 115 | Carbamidomethylation                | C1:Carbamidomethylation:1000.00;C2:Carbamidomethylation:1000.00                                                    | PEAKS DB |
| R.C(+57.02)M(+15.99)C(+57.02)EALQQIM(+15.99)ENQSDRLQGR.Q | Y    | 51.60  | 2498.0771 | 20     | 1.5  | 833.7009 | 3 | 30.07 | 12       | F12:1419 | OB5949 H3B Ro.raw | 2.7424E4           | 2        | 2                      | 116   | 135 | Carbamidomethylation; Oxidation (M) | C1:Carbamidomethylation:1000.00;M2:Oxidation (M):1000.00;C3:Carbamidomethylation:1000.00;M10:Oxidation (M):1000.00 | PEAKS DB |
| R.C(+57.02)MC(+57.02)EALQQIM(+15.99)ENQSDRLQGR.Q         | Y    | 51.16  | 2482.0820 | 20     | -0.8 | 828.3690 | 3 | 30.77 | 11       | F11:1452 | OB5948 H3B Ro.raw | 4.9643E4           | 3        | 3                      | 116   | 135 | Carbamidomethylation; Oxidation (M) | C1:Carbamidomethylation:1000.00;C3:Carbamidomethylation:1000.00;M10:Oxidation (M):78.75                            | PEAKS DB |

total 11 peptides

| Peptide                                           | Uniq | -10lgP | Mass      | Length | ppm  | m/z       | z | RT    | Fraction | Scan     | Source File       | Area Roast Ara h 3 | #Feature | #Feature Roast Ara h 3 | Start | End | PTM                                                                  | AScore                                                                                                            | Found By  |
|---------------------------------------------------|------|--------|-----------|--------|------|-----------|---|-------|----------|----------|-------------------|--------------------|----------|------------------------|-------|-----|----------------------------------------------------------------------|-------------------------------------------------------------------------------------------------------------------|-----------|
| R.C(+57.02)MC(+57.02)EALQQIMEN(+.98)QSDRLQGR,Q    | Y    | 42.46  | 2467.0713 | 20     | 2.4  | 1234.5490 | 2 | 34.84 | 10       | F10:1538 | OB5926 H3B Ro.raw | 0                  | 0        | 0                      | 116   | 135 | Carbamidomethylation                                                 | C1:Carbamidomethylation:1000.00;C3:Carbamidomethylation:1000.00;N12:Deamidation (NQ):27.42                        | PEAKS DB  |
| R.C(+57.02)C(+57.02)NELN(-17.03)EFENNQR,C         | Y    | 37.32  | 1708.6570 | 13     | -1.4 | 855.3364  | 2 | 32.73 | 11       | F11:1565 | OB5948 H3B Ro.raw | 0                  | 0        | 0                      | 103   | 115 | Carbamidomethylation                                                 | C1:Carbamidomethylation:1000.00;C2:Carbamidomethylation:1000.00;N6:Ammonia-loss (N):0.00                          | PEAKS PTM |
| R.C(+57.02)C(+71.04)NELNEFENNQR,C                 | Y    | 33.01  | 1739.6992 | 13     | 1.2  | 870.8579  | 2 | 29.23 | 12       | F12:1363 | OB5949 H3B Ro.raw | 1.7958E3           | 1        | 1                      | 103   | 115 | Carbamidomethylation                                                 | C1:Carbamidomethylation:1000.00;C2:Propionamide:0.00                                                              | PEAKS PTM |
| R.ANLRPC(+57.02)EQHLMQK,I                         | Y    | 30.71  | 1623.7974 | 13     | -5.2 | 542.2716  | 3 | 29.47 | 10       | F10:1222 | OB5926 H3B Ro.raw | 0                  | 0        | 0                      | 40    | 52  | Carbamidomethylation                                                 | C6:Carbamidomethylation:1000.00                                                                                   | PEAKS DB  |
| A.RQQWELQGDRR,C                                   | Y    | 30.25  | 1470.7440 | 11     | -2.8 | 491.2552  | 3 | 29.32 | 10       | F10:1217 | OB5926 H3B Ro.raw | 5.3324E3           | 1        | 1                      | 22    | 32  |                                                                      |                                                                                                                   | PEAKS DB  |
| R.C(-17.03)MC(+57.02)E(+57.02)ALQIQIMENQSDRLQGR,Q | Y    | 29.27  | 2449.0608 | 20     | 3.2  | 1225.5416 | 2 | 38.18 | 12       | F12:1892 | OB5949 H3B Ro.raw | 1.2706E5           | 1        | 1                      | 116   | 135 | Ammonia-loss (C@N-term); Carbamidomethylation (DHKE, X@N-term):36.07 | C1:Ammonia-loss (C@N-term):1000.00;C3:Carbamidomethylation:1000.00;E4:Carbamidomethylation (DHKE, X@N-term):36.07 | PEAKS PTM |
| total 11 peptides                                 |      |        |           |        |      |           |   |       |          |          |                   |                    |          |                        |       |     |                                                                      |                                                                                                                   |           |

#CONTAM#P35908

[back to list](#)

| [Protein Coverage](#) | [Supporting Peptides](#) |

Protein Coverage:

1 MSCQISCKSR GRGGGGGGFR GFSSGSAVVS GGSRRSTSSF SCLSRHGGGG GFGGGGGFGS RSLVGLGGTK SISISVAGGG

81 GGFGAAGGFG GRGGGFGGGS GFGGSGFGG GSGFSGGGFG GGGFGGGRFG GFGGPGGVGG LGPGGFGPG GYPGGIHEVS

161 VNQSLQLPLN VKVDPEIQNV KAQEREQIKT LNNKFASFID KVRFLEQQNQ VLQTKWELLQ QMNVGTRPIN LEPIFQGYID

241 SLKRYLDGLT AERTSQNSEL NMQDLVEDY KKKYEDEINK RTAAENDFVT LKKDVDNAYM IKVELQSKVD LLNQEIEFLK

321 VLYDAEISQI HQSVTDTNVI LSMDNSRNLD LDSIIAEVKA QYEEIAQRSK EEAEALYHSK YEELQVTVGR HGDSLKEIKI

401 EISELNRVIQ RLQGEIAHVK KQCKNVQDAI ADAEQRGEHA LKDARNKLND LEEALQQAKE DLARLLRDYQ ELMNVKLALD

481 VEIATYRKLL EGEECRMMSGD LSSNVTVSVT SSTISSNVAS KAAFSGSGGR GSSSGGGYSS GSSSYGSGGR QSGSRGGSGG

561 GGSISGGGYG SGGSGGGRYG SGGGSKGGS SI SGGGYSGGG KHSSGGGSRG GSSSGGGYGS GGGGSSSVKG SSGEAFGSSV

641 TFSFR

Supporting Peptides:

| Peptide          | Uniq | -10lgP | Mass      | Length | ppm  | m/z      | z | RT    | Fraction | Scan    | Source File       | Area Roast Ara h 3 | #Feature | #Feature Roast Ara h 3 | Start | End | PTM | AScore | Found By |
|------------------|------|--------|-----------|--------|------|----------|---|-------|----------|---------|-------------------|--------------------|----------|------------------------|-------|-----|-----|--------|----------|
| R.NLDLDSIIAEVK,A | Y    | 111.46 | 1328.7188 | 12     | -0.1 | 665.3666 | 2 | 36.11 | 7        | F7:1759 | OB5951 H3A Ro.raw | 3.8507E4           | 3        | 3                      | 348   | 359 |     |        | PEAKS DB |
| K.VDLLNQEIEFLK,V | Y    | 35.92  | 1459.7922 | 12     | 0.9  | 730.9041 | 2 | 36.29 | 8        | F8:1764 | OB5952 H3A Ro.raw | 0                  | 0        | 0                      | 309   | 320 |     |        | PEAKS DB |
| total 2 peptides |      |        |           |        |      |          |   |       |          |         |                   |                    |          |                        |       |     |     |        |          |

#CONTAM#P00761

[back to list](#)

| [Protein Coverage](#) | [Supporting Peptides](#) |

Protein Coverage:

1    FPTDDDDKIV GGYTCAANSI PYQVSLNSGS HFCGGSGLINS QWVVSAAHCY KSRIQVRLGE HNIDVLEGNE QFINAAKIIT

81    HPNFNGNTLD NDIMLIKLSS PATLNSRVAT VSLPRSCAAA GTECLISGWG NTKSSGSSYP SLLQCLKAPV LSDSSCKSSY

161    PGQITGNMIC VGFLEGGKDS CQGDSCGGPVV CNGQLQGIVS WGYGCAQKNK PGVYTKVCNY VNWIQQOTIAA N

Supporting Peptides:

| Peptide                 | Uniq | -10lgP | Mass      | Length | ppm | m/z       | z | RT    | Fraction | Scan    | Source File       | Area     | Roast | Ara h 3 | #Feature | #Feature | Roast | Ara h 3 | Start | End | PTM | AScore | Found By |
|-------------------------|------|--------|-----------|--------|-----|-----------|---|-------|----------|---------|-------------------|----------|-------|---------|----------|----------|-------|---------|-------|-----|-----|--------|----------|
| R.LGEHNIDVLEGNEQFIN.A   | Y    | 78.44  | 1939.9275 | 17     | 2.1 | 970.9730  | 2 | 33.47 | 9        | F9:1599 | OB5953 H3A Ro.raw | 2.6295E5 |       |         | 6        |          | 6     |         | 58    | 74  |     |        | PEAKS DB |
| R.LGEHNIDVLEGNEQFINAA.K | Y    | 62.93  | 2082.0017 | 19     | 2.3 | 1042.0105 | 2 | 34.27 | 8        | F8:1648 | OB5952 H3A Ro.raw | 0        |       |         | 0        |          | 0     |         | 58    | 76  |     |        | PEAKS DB |
| R.VATVSLPR.S            | Y    | 53.48  | 841.5021  | 8      | 0.4 | 421.7585  | 2 | 27.07 | 7        | F7:1253 | OB5951 H3A Ro.raw | 4.4431E4 |       |         | 5        |          | 5     |         | 108   | 115 |     |        | PEAKS DB |
| total 3 peptides        |      |        |           |        |     |           |   |       |          |         |                   |          |       |         |          |          |       |         |       |     |     |        |          |

A1E2B1|A1E2B1\_ARAHY

[back to list](#)

| [Protein Coverage](#) | [Supporting Peptides](#) |

Protein Coverage:

1    MSSSLLFLTL AYLVLIERLT CHAQSHGDRI GECRLEHLSV MEPTKRVESE GGVAEFWDDK SQQLCIGVT LIRYTIRPKG

81    LLLPFYTNAP RIHYILQKG VMEIVVTGCR AMYRSSTKRG MMSSYSDEHQ KIQSIEQNDA VAVPSSSVHW IYNTGHSDLV

161    LFSLVDVANA DNQLDPTFRN FLLSGNGNGK EGEESNNNWF IKKKQREAE GNVFSGLALE TLIGSFNVQR EIAEKVQGLK

241    DWRGSIILVK EGLDWLSPKE EEEEEGLEKR KKVMLMG

Supporting Peptides:

| Peptide                     | Uniq | -10lgP | Mass      | Length | ppm | m/z       | z | RT    | Fraction | Scan     | Source File       | Area     | Roast | Ara h 3 | #Feature | #Feature | Roast | Ara h 3 | Start | End | PTM | AScore | Found By |
|-----------------------------|------|--------|-----------|--------|-----|-----------|---|-------|----------|----------|-------------------|----------|-------|---------|----------|----------|-------|---------|-------|-----|-----|--------|----------|
| R.EAQEGNVFSGLALETIGSFNVQR.E | Y    | 106.83 | 2578.3027 | 24     | 1.7 | 1290.1636 | 2 | 40.50 | 11       | F11:2018 | OB5948 H3B Ro.raw | 1.1946E5 |       |         | 3        |          | 3     |         | 207   | 230 |     |        | PEAKS DB |
| K.GLLLPFYTNAPR.I            | Y    | 38.82  | 1360.7502 | 12     | 0.4 | 681.3827  | 2 | 35.77 | 8        | F8:1734  | OB5952 H3A Ro.raw | 0        |       |         | 0        |          | 0     |         | 80    | 91  |     |        | PEAKS DB |
| total 2 peptides            |      |        |           |        |     |           |   |       |          |          |                   |          |       |         |          |          |       |         |       |     |     |        |          |

Q42515|Q42515\_ARAHY

[back to list](#)

| [Protein Coverage](#) | [Supporting Peptides](#) |

Protein Coverage:

1    MKFCNFFTFT LALIVVLQAL GASADDAGTI ITQPLYNEFL KHLTDSRCEA HGFYTYNAFV TAARAFPAFG TTGDDVTRKR

81    ELAAFFGQTS HETTGTTNA PDEFEWGYCF LREQTKQHC DSTQAPCPAG KQYYGRGPIQ LTSNSNYQLA GQAIKADLIN

161    NPDLVATDAV ISFKTAIWFW MTPQGNKPSC HDVITNAWRP TATDSAAGRA PGYGVITNII NGGIECGKGA NTNSNNRIGF

241    YKRYCDILKI GYGSNLDCAN QQHF

Supporting Peptides:

| Peptide                 | Uniq | -10lgP | Mass      | Length | ppm | m/z       | z | RT    | Fraction | Scan     | Source File       | Area     | Roast | Ara h 3 | #Feature | #Feature | Roast | Ara h 3 | Start | End | PTM | AScore | Found By |
|-------------------------|------|--------|-----------|--------|-----|-----------|---|-------|----------|----------|-------------------|----------|-------|---------|----------|----------|-------|---------|-------|-----|-----|--------|----------|
| A.DDAGTIITQPLYNEFLK.H   | Y    | 63.02  | 1936.9781 | 17     | 2.4 | 969.4987  | 2 | 37.23 | 12       | F12:1836 | OB5949 H3B Ro.raw | 2.7447E4 |       |         | 1        |          | 1     |         | 25    | 41  |     |        | PEAKS DB |
| R.GPIQLTSNSNYQLAGQAIK.A | Y    | 54.85  | 2002.0483 | 19     | 5.6 | 1002.0396 | 2 | 31.80 | 10       | F10:1360 | OB5926 H3B Ro.raw | 0        |       |         | 0        |          | 0     |         | 137   | 155 |     |        | PEAKS DB |
| total 2 peptides        |      |        |           |        |     |           |   |       |          |          |                   |          |       |         |          |          |       |         |       |     |     |        |          |

Peptide List

Prepared with PEAKS™ (bioinform.com)



Summary

1. Notes

Ara h 6 GEL BAND RAW

2. Result Statistics

Figure 1. False discovery rate (FDR) curve. X axis is the number of peptides being kept. Y axis is the corresponding FDR. ?

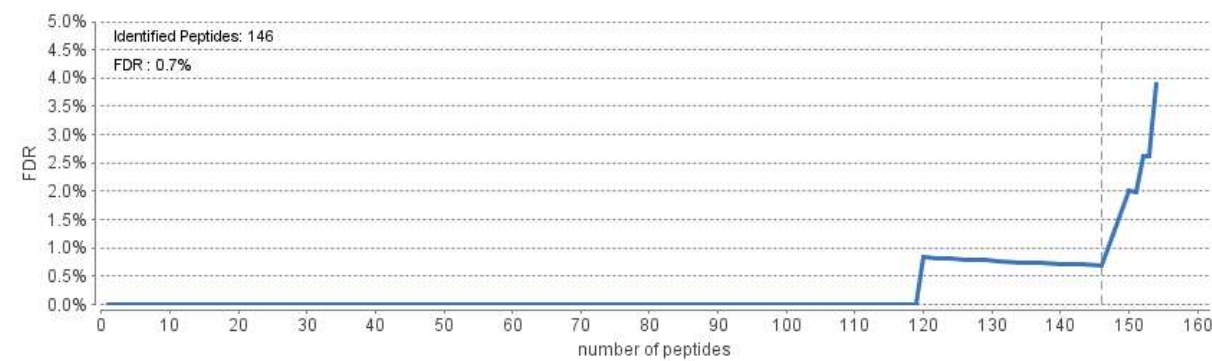

Figure 2. PSM score distribution. (a) Distribution of PEAKS peptide score; (b) Scatterplot of PEAKS peptide score versus precursor mass error. ?

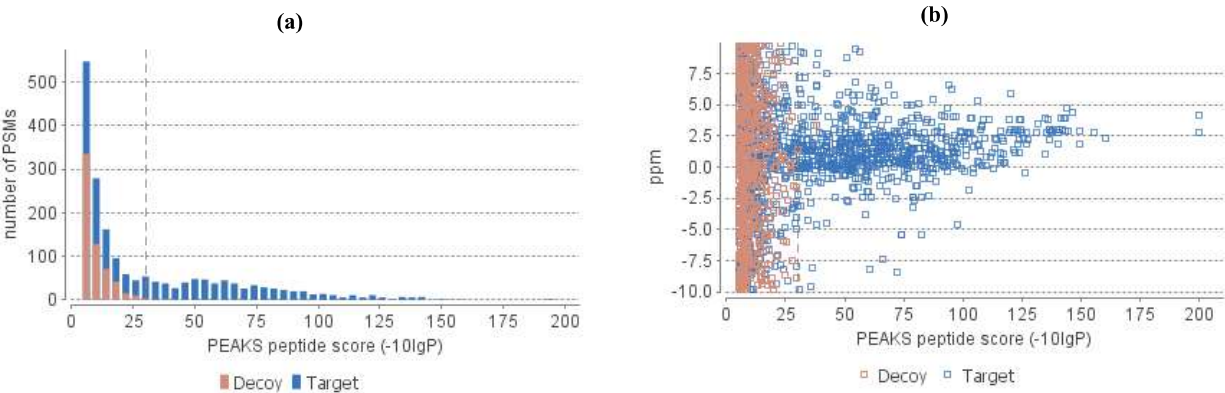

Table 1. Statistics of data.

|       | #Scans |       |          | #Features | Identified |        |             | #Peptides | #Sequences | #Proteins* |     |     |
|-------|--------|-------|----------|-----------|------------|--------|-------------|-----------|------------|------------|-----|-----|
|       | MS1    | MS/MS | #Chimera |           | #PSMs      | #Scans | #Features** |           |            | Groups     | All | Top |
| Total | 7599   | 3719  | 318      | 5330      | 677        | 665    | 246         | 146       | 90         | 13         | 30  | 20  |

|         |      |      |     |      |     |     |     |     |    |    |    |    |
|---------|------|------|-----|------|-----|-----|-----|-----|----|----|----|----|
| Raw     | 7599 | 3719 | 318 | 5330 | 677 | 665 | 246 | 146 | 90 | 13 | 30 | 20 |
| Ara h 6 |      |      |     |      |     |     |     |     |    |    |    |    |

\* proteins with significant peptides are used in counts.  
\*\* features are identified by DB search only.

Figure 3. Sample overlap for Proteins and Peptides (up to 8 samples). (a) All Proteins; (b) Top Proteins; (c) Peptides; ?

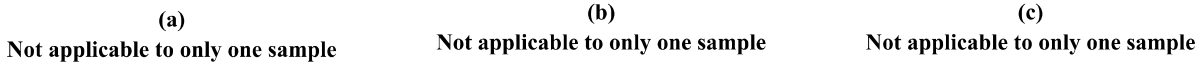

Figure 4. Distribution of peptide feature detection. (a) Feature m/z distribution; (b) Feature RT distribution.

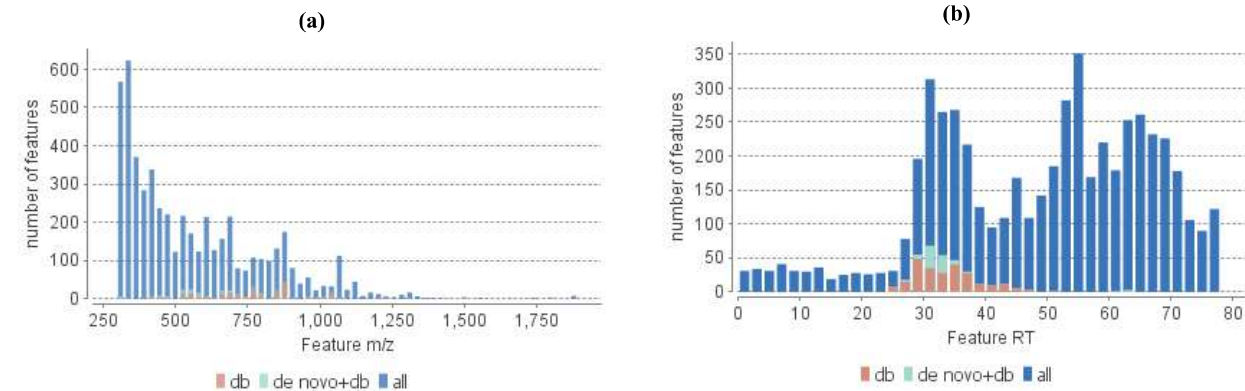

Figure 5. Distribution of identified peptide features. (a) Feature abundance distribution; (b) De novo sequencing validation. ?

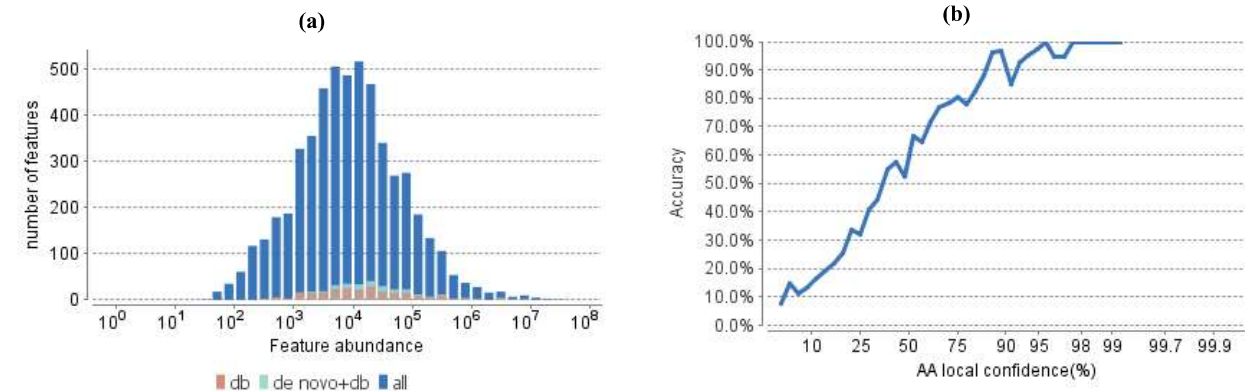

Table 2. Result filtration parameters.

|                |       |
|----------------|-------|
| Peptide -10lgP | ≥30.4 |
| PTM AScore     | ≥50   |
| Protein -10lgP | ≥20   |

Table 4. PTM profile.

| Name            | ΔMass | Position | #PSM | -10lgP | Abundance | AScore  |
|-----------------|-------|----------|------|--------|-----------|---------|
| Carbamidomethyl | 57.02 | C        | 257  | 200.00 | 2.94E6    | 1000.00 |

Proteins unique peptides  $\geq 2$   
De novo score(%)  $\geq 50\%$

**Table 3.** Statistics of filtered result.

FDR (Peptide-Spectrum Matches) 0.1%  
FDR (Peptide Sequences) 0.7%  
FDR (Protein Group) 0.0%  
De Novo Only Spectra 101

|                     |        |                |    |        |        |         |
|---------------------|--------|----------------|----|--------|--------|---------|
| Oxidation           | 15.99  | M              | 58 | 159.99 | 9.75E5 | 1000.00 |
| Deamidation         | .98    | NQ             | 32 | 143.79 |        | 177.50  |
| Propionamide        | 71.04  | C              | 31 | 115.59 | 1.54E5 | 1000.00 |
| Pyro-glu from Q     | -17.03 | N-term         | 8  | 81.09  | 6.97E4 | 1000.00 |
| Ethyl               | 28.03  | D,N-term       | 7  | 76.48  | 6.59E3 | 6.59    |
| Sodium              | 21.98  | DE             | 6  | 66.88  |        | 12.81   |
| Carbamidomethyl     | 57.02  | DEK            | 6  | 98.03  | 8.98E3 | 174.73  |
| Dehydration         | -18.01 | DTY            | 5  | 51.30  |        | 0.00    |
| Ammonia loss        | -17.03 | N-term         | 5  | 98.03  | 8.98E3 | 1000.00 |
| Dimethylation(KR)   | 28.03  | K              | 4  | 100.40 | 6.56E4 | 1000.00 |
| Cation:Fe[II]       | 53.92  | E              | 4  | 50.16  |        | 88.04   |
| Acetylation         | 42.01  | Protein N-term | 3  | 70.92  | 1.19E4 | 1000.00 |
| Carbamylation       | 43.01  | N-term         | 2  | 32.96  |        | 1000.00 |
| Methylation(KR)     | 14.02  | K              | 2  | 78.26  | 1.55E4 | 1000.00 |
| Acetylation         | 42.01  | N-term         | 1  | 37.89  |        | 1000.00 |
| Methylation(others) | 14.02  | E              | 1  | 33.33  |        | 7.32    |
| NDA                 | 175.04 | N-term         | 1  | 30.83  | 1.81E3 | 1000.00 |
| Pyro-glu from E     | -18.01 | N-term         | 1  | 61.73  |        | 1000.00 |
| Carboxylation       | 43.99  | D              | 1  | 35.98  | 3.94E3 | 1000.00 |

proteins

### 3. Experiment Control

**Figure 6.** Precursor mass error of peptide-spectrum matches (PSM) in filtered result. **(a)** Distribution of precursor mass error in ppm; **(b)** Scatterplot of precursor m/z versus precursor mass error in ppm. ?

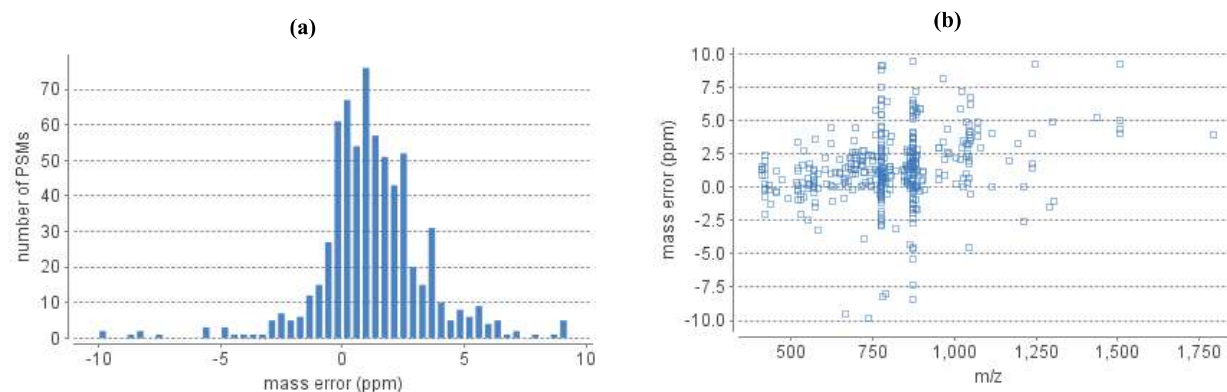

**Table 5.** Number of identified peptides in each sample by the number of missed cleavages.

| Missed Cleavages | 0   | 1  | 2 | 3 | 4+ |
|------------------|-----|----|---|---|----|
| Raw Ara h 6      | 112 | 32 | 2 | 0 | 0  |

4. Other Information

**Table 6.** Search parameters.

PEAKS Version: PEAKS Studio 10.6 build 20201015  
Search Engine Name: PEAKS  
Parent Mass Error Tolerance: 10.0 ppm  
Fragment Mass Error Tolerance: 0.5 Da  
Precursor Mass Search Type: monoisotopic  
Enzyme: Trypsin  
Max Missed Cleavages: 2  
Digest Mode: Semispecific  
Fixed Modifications:  
  Carbamidomethylation: 57.02  
Variable Modifications:  
  Oxidation (M): 15.99  
  Deamidation (NQ): 0.98  
  Acetylation (K): 42.01  
  Acetylation (Protein N-term): 42.01  
  Acetylation (N-term): 42.01  
  Amidation: -0.98  
  Beta-methylthiolation: 45.99  
  Biotinylation: 226.08  
  and 303 more...  
Max Variable PTM Per Peptide: 5  
Database: Uniprot\_Peanut-3818\_Jul18  
Taxon: All  
Contaminant Database: contam MQ  
Searched Entry: 1723  
FDR Estimation: Enabled  
De novo score(%) threshold: 15  
Peptide hit threshold (-10logP): 30.0  
Peaks run ID: 29  
Merge Options: no merge  
Precursor Options: corrected  
Charge Options: no correction  
Filter m/z: 200.0 - 2000.0  
Filter Charge: 2 - 12  
Process: true  
Associate chimera: yes

Protein List

Protein Accession Contains:  
Protein Description Contains:  
Protein Sample Area >=  
Protein PTM Contains:

**Table 7.** Instrument parameters.

Fractions: OB5918 H6 raw.raw, OB5930 H6 raw.raw, OB5931 H6 raw.  
raw  
Ion Source: ESI(nano-spray)  
Fragmentation Mode: CID, CAD(y and b ions)  
MS Scan Mode: FT-ICR/Orbitrap  
MS/MS Scan Mode: FT-ICR/Orbitrap



| Protein Group     | Protein ID | Accession                   | -10lgP | Coverage (%) | Coverage (%) Raw Ara h 6 | Area Raw Ara h 6 | #Peptides | #Unique | #Spec Raw Ara h 6 | PTM | Avg. Mass | Description                                                                              |
|-------------------|------------|-----------------------------|--------|--------------|--------------------------|------------------|-----------|---------|-------------------|-----|-----------|------------------------------------------------------------------------------------------|
| 1                 | 1          | A5Z1R0 A5Z1R0_ARAHY         | 474.75 | 67           | 67                       | 3.7681E7         | 14        | 14      | 458               | Y   | 16920     | Ara h 6 allergen OS=Arachis hypogaea OX=3818 GN=Ara h 6 PE=4 SV=1                        |
| 1                 | 2          | sp Q647G9 CONG_ARAHY        | 474.75 | 67           | 67                       | 3.7681E7         | 14        | 14      | 458               | Y   | 16920     | Conglutin OS=Arachis hypogaea OX=3818 PE=1 SV=1                                          |
| 3                 | 6          | B0YIU5 B0YIU5_ARAHY         | 280.47 | 59           | 59                       | 3.25E5           | 5         | 5       | 30                | Y   | 16413     | Ara h 8 allergen isoform OS=Arachis hypogaea OX=3818 PE=2 SV=1                           |
| 2                 | 14         | #CONTAM#P00761              | 271.18 | 29           | 29                       | 2.4398E6         | 9         | 9       | 49                | Y   | 24409     | SWISS-PROT: #CONTAM#P00761 TRYP_PIG Trypsin - Sus scrofa (Pig).                          |
| 8                 | 18         | Q2PK12 Q2PK12_ARAHY         | 257.59 | 60           | 60                       | 1.581E5          | 5         | 5       | 16                | Y   | 16090     | Actin depolymerizing factor-like protein OS=Arachis hypogaea OX=3818 PE=2 SV=1           |
| 9                 | 19         | #CONTAM#P04264              | 224.47 | 15           | 15                       | 1.7352E5         | 8         | 8       | 13                | N   | 66018     | SWISS-PROT: #CONTAM#P04264 Tax_Id=9606 Gene_Symbol=KRT1 Keratin, type II cytoskeletal 1  |
| 14                | 17         | #CONTAM#P13645              | 192.47 | 12           | 12                       | 2.1942E4         | 5         | 5       | 9                 | Y   | 59511     | SWISS-PROT: #CONTAM#P13645 Tax_Id=9606 Gene_Symbol=KRT10 Keratin, type I cytoskeletal 10 |
| 12                | 12         | A0A0A6ZDP1 A0A0A6ZDP1_ARAHY | 178.19 | 40           | 40                       | 2.4038E4         | 5         | 5       | 11                | N   | 20101     | Glyceraldehyde-3-phosphate dehydrogenase C2 OS=Arachis hypogaea OX=3818 PE=2 SV=1        |
| 16                | 25         | E9LFE8 E9LFE8_ARAHY         | 174.91 | 15           | 15                       | 7.8483E3         | 3         | 3       | 6                 | N   | 28290     | 11S arachin (Fragment) OS=Arachis hypogaea OX=3818 PE=2 SV=1                             |
| 13                | 26         | Q45W80 Q45W80_ARAHY         | 169.07 | 29           | 29                       | 1.089E5          | 4         | 4       | 10                | Y   | 16439     | Nucleoside diphosphate kinase OS=Arachis hypogaea OX=3818 PE=2 SV=1                      |
| 19                | 27         | Q6PSU3 Q6PSU3_ARAHY         | 112.24 | 6            | 6                        | 2.1534E4         | 2         | 2       | 4                 | N   | 66575     | Conarachin (Fragment) OS=Arachis hypogaea OX=3818 PE=4 SV=1                              |
| 19                | 29         | sp P43237 ALL11_ARAHY       | 112.24 | 5            | 5                        | 2.1534E4         | 2         | 2       | 4                 | N   | 70283     | Allergen Ara h 1, clone P17 OS=Arachis hypogaea OX=3818 PE=1 SV=1                        |
| 19                | 28         | B3IXL2 B3IXL2_ARAHY         | 112.24 | 5            | 5                        | 2.1534E4         | 2         | 2       | 4                 | N   | 70283     | Main allergen Ara h1 OS=Arachis hypogaea OX=3818 PE=2 SV=1                               |
| 19                | 31         | N1NG13 N1NG13_ARAHY         | 112.24 | 5            | 5                        | 2.1534E4         | 2         | 2       | 4                 | N   | 71345     | Seed storage protein Ara h1 OS=Arachis hypogaea OX=3818 GN=ARAX_AH F417E07-017 PE=4 SV=1 |
| 19                | 30         | sp P43238 ALL12_ARAHY       | 112.24 | 5            | 5                        | 2.1534E4         | 2         | 2       | 4                 | N   | 71345     | Allergen Ara h 1, clone P41B OS=Arachis hypogaea OX=3818 PE=1 SV=1                       |
| 19                | 33         | Q6PSU4 Q6PSU4_ARAHY         | 112.24 | 7            | 7                        | 2.1534E4         | 2         | 2       | 4                 | N   | 48095     | Conarachin (Fragment) OS=Arachis hypogaea OX=3818 PE=2 SV=1                              |
| 20                | 48         | K7PQ65 K7PQ65_ARAHY         | 102.66 | 13           | 13                       | 1.6896E4         | 2         | 2       | 4                 | N   | 19193     | Mother of FT and TFL1 OS=Arachis hypogaea OX=3818 GN=MFT PE=2 SV=1                       |
| 17                | 40         | Q1HDS7 Q1HDS7_ARAHY         | 97.95  | 32           | 32                       | 5.6334E5         | 2         | 2       | 5                 | N   | 15198     | Superoxide dismutase [Cu-Zn] OS=Arachis hypogaea OX=3818 PE=2 SV=1                       |
| 17                | 39         | Q45W82 Q45W82_ARAHY         | 97.95  | 32           | 32                       | 5.6334E5         | 2         | 2       | 5                 | N   | 15098     | Cu-Zn superoxide dismutase OS=Arachis hypogaea OX=3818 PE=2 SV=1                         |
| 21                | 49         | #CONTAM#P35527              | 78.38  | 6            | 6                        | 1.5851E4         | 2         | 2       | 3                 | N   | 62129     | SWISS-PROT: #CONTAM#P35527 Tax_Id=9606 Gene_Symbol=KRT9 Keratin, type I cytoskeletal 9   |
| total 20 proteins |            |                             |        |              |                          |                  |           |         |                   |     |           |                                                                                          |

A5Z1R0|A5Z1R0\_ARAHY

[back to list](#)

| [Protein Coverage](#) | [Supporting Peptides](#) |

Protein Coverage:

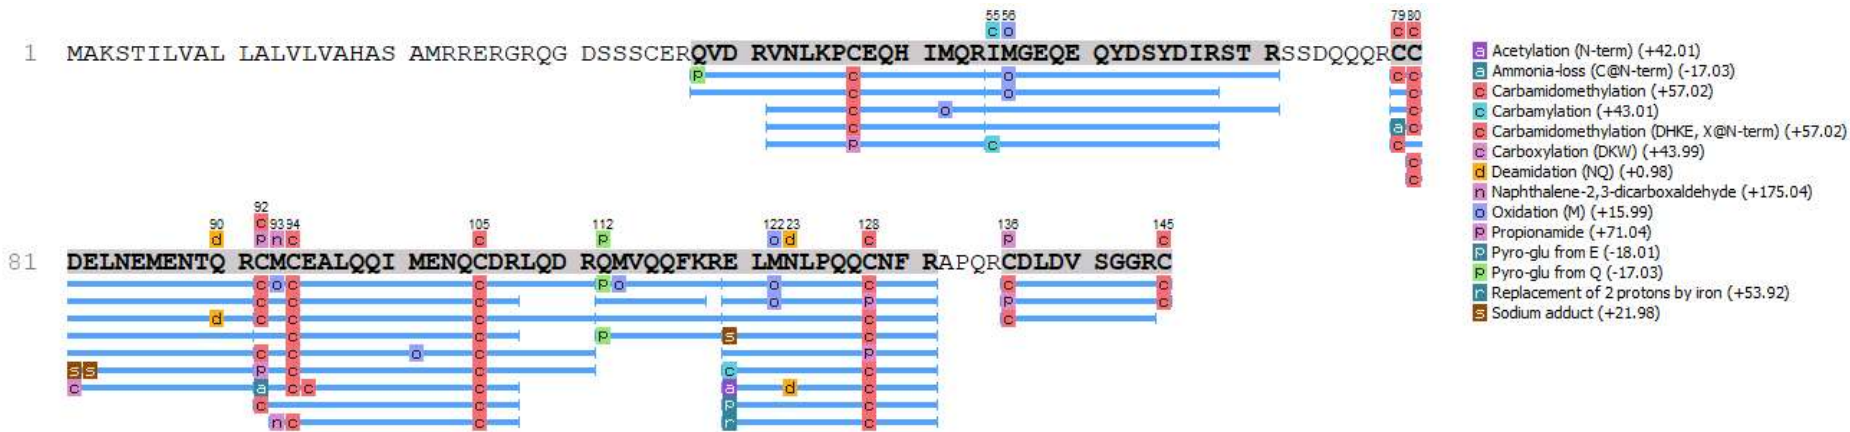

Supporting Peptides:

| Peptide                                      | Uniq | -10lgP | Mass      | Length | ppm | m/z       | z | RT    | Fraction | Scan    | Source File       | Area Raw Area h 6 | #Feature | #Feature Raw Area h 6 | Start | End | PTM                                 | AScore                                                                                                  | Found By  |
|----------------------------------------------|------|--------|-----------|--------|-----|-----------|---|-------|----------|---------|-------------------|-------------------|----------|-----------------------|-------|-----|-------------------------------------|---------------------------------------------------------------------------------------------------------|-----------|
| R.ELMNLPPQC(+57.02)NFR.A                     | Y    | 200.00 | 1548.7177 | 12     | 2.7 | 775.3682  | 2 | 31.64 | 2        | F2:1514 | OB5930 H6 raw.raw | 1.002E7           | 12       | 12                    | 120   | 131 | Carbamidomethylation                | C9:Carbamido methylation:1 000.00                                                                       | PEAKS DB  |
| R.C(+57.02)MC(+57.02)EALQQIMENQC(+57.02)DR.L | Y    | 200.00 | 2084.8206 | 16     | 4.1 | 1043.4219 | 2 | 34.27 | 1        | F1:1540 | OB5918 H6 raw.raw | 1.0292E5          | 5        | 5                     | 92    | 107 | Carbamidomethylation                | C1:Carbamido methylation:1 000.00; C3:Carbamido methylation:1 000.00; C14:Carbamidomethylation:1 000.00 | PEAKS DB  |
| R.IM(+15.99)GEQEYDSYDIR.S                    | Y    | 159.99 | 1761.7516 | 14     | 2.3 | 881.8851  | 2 | 29.04 | 2        | F2:1368 | OB5930 H6 raw.raw | 2.8909E6          | 4        | 4                     | 55    | 68  | Oxidation (M)                       | M2:Oxidation (M):10 00.00                                                                               | PEAKS DB  |
| R.IMGEQEYDSYDIR.S                            | Y    | 149.03 | 1745.7566 | 14     | 2.9 | 873.8881  | 2 | 30.57 | 2        | F2:1471 | OB5930 H6 raw.raw | 1.5582E7          | 25       | 25                    | 55    | 68  |                                     |                                                                                                         | PEAKS DB  |
| R.ELM(+15.99)NLPQQC(+57.02)NFR.A             | Y    | 122.17 | 1564.7126 | 12     | 1.2 | 783.3645  | 2 | 29.23 | 2        | F2:1369 | OB5930 H6 raw.raw | 1.279E6           | 4        | 4                     | 120   | 131 | Oxidation (M); Carbamidomethylation | M3:Oxidation (M):10 00.00; C9:Carbamido methylation:1 000.00                                            | PEAKS DB  |
| R.ELMNLPPQC(+71.04)NFR.A                     | Y    | 115.59 | 1562.7334 | 12     | 0.5 | 782.3744  | 2 | 31.70 | 1        | F1:1393 | OB5918 H6 raw.raw | 3.6232E5          | 3        | 3                     | 120   | 131 | Propionamide                        | C9:Propionamide:100 0.00                                                                                | PEAKS PTM |
| R.C(+57.02)C(+57.02)DELNEMENTQR.C            | Y    | 112.33 | 1697.6444 | 13     | 1.2 | 849.8305  | 2 | 28.10 | 1        | F1:1153 | OB5918 H6 raw.raw | 1.5792E5          | 3        | 3                     | 79    | 91  | Carbamidomethylation                | C1:Carbamido methylation:1 000.00; C2:Carbamido methylation:1 000.00                                    | PEAKS DB  |
| R.C(+57.02)DLVSGGRC(+57.02)                  | Y    | 106.51 | 1137.4543 | 10     | 0.3 | 569.7346  | 2 | 25.66 | 3        | F3:1179 | OB5931 H6 raw.raw | 3.6673E4          | 3        | 3                     | 136   | 145 | Carbamidomethylation                | C1:Carbamido methylation:1 000.00; C10:Carbamidomethylation:1 000.00                                    | PEAKS DB  |

total 61 peptides

| Peptide                                                  | Uniq | -10lgP | Mass      | Length | ppm  | m/z       | z | RT    | Fraction | Scan    | Source File       | Area Raw Area 6 | #Feature | #Feature Raw Area 6 | Start | End | PTM                                                                                  | AScore                                                                                                                                                 | Found By  |
|----------------------------------------------------------|------|--------|-----------|--------|------|-----------|---|-------|----------|---------|-------------------|-----------------|----------|---------------------|-------|-----|--------------------------------------------------------------------------------------|--------------------------------------------------------------------------------------------------------------------------------------------------------|-----------|
| R.C(+57.02)MC(+57.02)EALQQIMENQC(+57.02)DRLQDR.Q         | Y    | 104.61 | 2597.0913 | 20     | 1.7  | 866.7058  | 3 | 35.32 | 2        | F2:1730 | OB5930 H6 raw.raw | 2.9307E6        | 5        | 5                   | 92    | 111 | Carbamidomethylation                                                                 | C1:Carbamidomethylation:1000.00; C3:Carbamidomethylation:1000.00; C14:Carbamidomethylation:1000.00                                                     | PEAKS DB  |
| R.VNLKPC(+57.02)EQHIMQR.I                                | Y    | 99.65  | 1651.8286 | 13     | -0.1 | 551.6168  | 3 | 31.27 | 2        | F2:1515 | OB5930 H6 raw.raw | 1.3033E6        | 6        | 6                   | 42    | 54  | Carbamidomethylation                                                                 | C6:Carbamidomethylation:1000.00                                                                                                                        | PEAKS DB  |
| R.C(-17.03)MC(+57.02)E(+57.02)ALQQIMENQC(+57.02)DR.L     | Y    | 98.03  | 2067.7942 | 16     | 2.3  | 1034.9067 | 2 | 39.07 | 2        | F2:1959 | OB5930 H6 raw.raw | 3.2701E4        | 3        | 3                   | 92    | 107 | Ammonia-loss (C@N-term); Carbamidomethylation; Carbamidomethylation (DHKE, X@N-term) | C1:Ammonia-loss (C@N-term):1000.00; C3:Carbamidomethylation:1000.00; E4:Carbamidomethylation (DHKE, X@N-term):194.40; C14:Carbamidomethylation:1000.00 | PEAKS PTM |
| R.C(+57.02)M(+15.99)C(+57.02)EALQQIMENQC(+57.02)DRLQDR.Q | Y    | 97.13  | 2613.0862 | 20     | 1.6  | 872.0374  | 3 | 33.15 | 1        | F1:1482 | OB5918 H6 raw.raw | 6.1802E5        | 3        | 3                   | 92    | 111 | Carbamidomethylation; Oxidation (M)                                                  | C1:Carbamidomethylation:1000.00; M2:Oxidation (M):131.34; C3:Carbamidomethylation:1000.00; C14:Carbamidomethylation:1000.00                            | PEAKS DB  |

total 61 peptides

| Peptide                                          | Uniq | -10lgP | Mass      | Length | ppm | m/z       | z | RT    | Fraction | Scan    | Source File       | Area Raw Area 6 | #Feature | #Feature Raw Area 6 | Start | End | PTM                                | AScore                                                                                      | Found By  |
|--------------------------------------------------|------|--------|-----------|--------|-----|-----------|---|-------|----------|---------|-------------------|-----------------|----------|---------------------|-------|-----|------------------------------------|---------------------------------------------------------------------------------------------|-----------|
| R.C(+71.04)MC(+57.02)EALQQIMENQC(+57.02)DR.L     | Y    | 91.03  | 2098.8362 | 16     | 4.1 | 1050.4297 | 2 | 34.27 | 1        | F1:1549 | OB5918 H6 raw.raw | 8.2569E3        | 1        | 1                   | 92    | 107 | Carbamidomethylation               | C1:Propionamide:22.85;C3:Carbamidomethylation:1000.00;C14:Carbamidomethylation:1000.00      | PEAKS PTM |
| R.C(+71.04)MC(+57.02)EALQQIMENQC(+57.02)DRLQDR.Q | Y    | 90.77  | 2611.1069 | 20     | 0.5 | 871.3766  | 3 | 34.84 | 1        | F1:1571 | OB5918 H6 raw.raw | 3.7421E5        | 1        | 1                   | 92    | 111 | Propionamide; Carbamidomethylation | C1:Propionamide:54.01;C3:Carbamidomethylation:1000.00;C14:Carbamidomethylation:1000.00      | PEAKS PTM |
| R.C(+57.02)C(+57.02)DELNEMENTQ(+.98)R.C          | Y    | 90.49  | 1698.6284 | 13     | 1.2 | 850.3225  | 2 | 28.66 | 2        | F2:1327 | OB5930 H6 raw.raw | 2.5004E5        | 3        | 3                   | 79    | 91  | Carbamidomethylation               | C1:Carbamidomethylation:1000.00;C2:Carbamidomethylation:1000.00;Q12:Deamidation (N Q):36.05 | PEAKS DB  |
| R.C(+71.04)C(+57.02)DELNEMENTQR.C                | Y    | 89.19  | 1711.6600 | 13     | 0.6 | 856.8378  | 2 | 28.19 | 2        | F2:1295 | OB5930 H6 raw.raw | 1.4647E5        | 3        | 3                   | 79    | 91  | Carbamidomethylation               | C1:Propionamide:10.11;C2:Carbamidomethylation:1000.00                                       | PEAKS PTM |
| R.C(+71.04)DLDVSGGRC(+57.02)                     | Y    | 86.72  | 1151.4700 | 10     | 3.6 | 576.7443  | 2 | 25.80 | 1        | F1:1058 | OB5918 H6 raw.raw | 7.0267E3        | 2        | 2                   | 136   | 145 | Propionamide; Carbamidomethylation | C1:Propionamide:123.21;C10:Carbamidomethylation:1000.00                                     | PEAKS PTM |
| R.Q(-17.03)MVQQFKR.E                             | Y    | 81.09  | 1046.5331 | 8      | 1.5 | 524.2746  | 2 | 28.32 | 1        | F1:1185 | OB5918 H6 raw.raw | 2.0304E5        | 3        | 3                   | 112   | 119 | Pyro-glu from Q                    | Q1:Pyro-glu from Q:1000.00                                                                  | PEAKS PTM |

total 61 peptides

| Peptide                                   | Uniq | -10lgP | Mass      | Length | ppm  | m/z      | z | RT    | Fraction | Scan    | Source File       | Area Raw Area 6 | #Feature | #Feature Raw Area 6 | Start | End | PTM                                           | AScore                                                                                                              | Found By  |
|-------------------------------------------|------|--------|-----------|--------|------|----------|---|-------|----------|---------|-------------------|-----------------|----------|---------------------|-------|-----|-----------------------------------------------|---------------------------------------------------------------------------------------------------------------------|-----------|
| R.C(+57.02)(+28.03)C(+57.02)DELNEMENTQR.C | Y    | 76.48  | 1725.6757 | 13     | 0.1  | 863.8452 | 2 | 28.26 | 2        | F2:1306 | OB5930 H6 raw.raw | 1.2726E4        | 2        | 2                   | 79    | 91  | Carbamidomethylation                          | C1:Carbamidomethylation:1000.00; C1:Ethylation:13.67; C2:Carbamidomethylation:1000.00                               | PEAKS PTM |
| R.C(+71.04)C(+57.02)DELNEMENTQ(+.98)R.C   | Y    | 73.91  | 1712.6440 | 13     | 0.5  | 857.3297 | 2 | 28.89 | 3        | F3:1347 | OB5931 H6 raw.raw | 2.4957E5        | 3        | 3                   | 79    | 91  | Carbamidomethylation; Deamidation (NQ)        | C1:Propionamide:12.28; C2:Carbamidomethylation:1000.00; Q12:Deamidation (NQ):56.37                                  | PEAKS PTM |
| R.C(+57.02)C(+71.04)DELNEMENTQR.C         | Y    | 73.29  | 1711.6600 | 13     | 2.8  | 856.8397 | 2 | 28.39 | 2        | F2:1328 | OB5930 H6 raw.raw | 5.119E4         | 1        | 1                   | 79    | 91  | Carbamidomethylation                          | C1:Carbamidomethylation:1000.00; C2:Propionamide:12.28                                                              | PEAKS PTM |
| R.C(-17.03)C(+57.02)D(+57.02)ELNEMENTQR.C | Y    | 72.79  | 1680.6178 | 13     | 1.3  | 841.3173 | 2 | 32.42 | 1        | F1:1439 | OB5918 H6 raw.raw | 9.4578E3        | 1        | 1                   | 79    | 91  | Ammonia-loss (C@N-term); Carbamidomethylation | C1:Ammonia-loss (C@N-term):1000.00; C2:Carbamidomethylation:1000.00; D3:Carbamidomethylation (DHKE, X@N-term):12.28 | PEAKS PTM |
| R.C(+57.02)DLDSVSGGR.C                    | Y    | 69.89  | 977.4236  | 9      | -0.8 | 489.7187 | 2 | 24.72 | 1        | F1:1012 | OB5918 H6 raw.raw | 0               | 0        | 0                   | 136   | 144 | Carbamidomethylation                          | C1:Carbamidomethylation:1000.00                                                                                     | PEAKS DB  |
| R.IMGEQEQYDSYDIRSTR.S                     | Y    | 68.55  | 2089.9375 | 17     | 2.6  | 697.6549 | 3 | 29.87 | 1        | F1:1284 | OB5918 H6 raw.raw | 7.5645E4        | 3        | 3                   | 55    | 71  |                                               |                                                                                                                     | PEAKS DB  |

total 61 peptides

| Peptide                                              | Uniq | -10lgP | Mass      | Length | ppm  | m/z       | z | RT    | Fraction | Scan    | Source File       | Area Raw Area h 6 | #Feature | #Feature Raw Area h 6 | Start | End | PTM                                   | AScore                                                                                                                     | Found By  |
|------------------------------------------------------|------|--------|-----------|--------|------|-----------|---|-------|----------|---------|-------------------|-------------------|----------|-----------------------|-------|-----|---------------------------------------|----------------------------------------------------------------------------------------------------------------------------|-----------|
| R.Q(-17.03)VDRVNLKPC(+57.02)EQHIMQR.I                | Y    | 67.85  | 2133.0571 | 17     | 1.7  | 534.2725  | 4 | 31.34 | 1        | F1:1372 | OB5918 H6 raw.raw | 3.0682E5          | 2        | 2                     | 38    | 54  | Pyro-glu from Q; Carbamidomethylation | Q1:Pyro-glu from Q:1000.00; C10:Carbamidomethylation:1000.00                                                               | PEAKS PTM |
| R.IMGEQE(+21.98)QYDSYDIR.S                           | Y    | 66.88  | 1767.7385 | 14     | 1.6  | 884.8780  | 2 | 30.42 | 2        | F2:1450 | OB5930 H6 raw.raw | 0                 | 0        | 0                     | 55    | 68  |                                       | E6:Sodium adduct:12.81                                                                                                     | PEAKS PTM |
| R.ELM(+15.99)NLPQQC(+71.04)NFR.A                     | Y    | 64.44  | 1578.7283 | 12     | 0.7  | 790.3719  | 2 | 29.48 | 2        | F2:1390 | OB5930 H6 raw.raw | 1.3436E4          | 2        | 2                     | 120   | 131 | Oxidation (M); Propionamide           | M3:Oxidation (M):1000.00; C9:Propionamide:1000.00                                                                          | PEAKS PTM |
| R.E(-18.01)LMNLPQQC(+57.02)NFR.A                     | Y    | 61.73  | 1530.7072 | 12     | 1.2  | 766.3618  | 2 | 35.00 | 2        | F2:1722 | OB5930 H6 raw.raw | 0                 | 0        | 0                     | 120   | 131 | Pyro-glu from E; Carbamidomethylation | E1:Pyro-glu from E:1000.00; C9:Carbamidomethylation:1000.00                                                                | PEAKS PTM |
| R.IMGEQEQ(+.98)YDSYDIR.S                             | Y    | 56.51  | 1746.7406 | 14     | 5.7  | 874.3826  | 2 | 40.55 | 3        | F3:2044 | OB5931 H6 raw.raw | 0                 | 0        | 0                     | 55    | 68  |                                       | Q7:Deamidation (NQ):19.68                                                                                                  | PEAKS DB  |
| R.C(+57.02)M(+15.99)C(+57.02)EALQQIMENQC(+57.02)DR.L | Y    | 54.61  | 2100.8157 | 16     | 6.8  | 1051.4222 | 2 | 32.37 | 3        | F3:1570 | OB5931 H6 raw.raw | 0                 | 0        | 0                     | 92    | 107 | Carbamidomethylation                  | C1:Carbamidomethylation:1000.00; M2:Oxidation (M):43.13; C3:Carbamidomethylation:1000.00; C14:Carbamidomethylation:1000.00 | PEAKS DB  |
| R.IMGEQ(+.98)EQYDSYDIR.S                             | Y    | 54.23  | 1746.7406 | 14     | 9.5  | 874.3859  | 2 | 40.80 | 1        | F1:1928 | OB5918 H6 raw.raw | 1.3457E3          | 1        | 1                     | 55    | 68  |                                       | Q5:Deamidation (NQ):26.31                                                                                                  | PEAKS DB  |
| R.QMVQQFK.R                                          | Y    | 53.65  | 907.4586  | 7      | -0.3 | 454.7364  | 2 | 26.28 | 1        | F1:1080 | OB5918 H6 raw.raw | 1.4384E4          | 3        | 3                     | 112   | 118 |                                       |                                                                                                                            | PEAKS DB  |

total 61 peptides

| Peptide                                         | Uniq | -10lgP | Mass      | Length | ppm  | m/z      | z | RT    | Fraction | Scan    | Source File       | Area Raw Area 6 | #Feature | #Feature Raw Area 6 | Start | End | PTM                                                    | AScore                                                                                                                  | Found By  |
|-------------------------------------------------|------|--------|-----------|--------|------|----------|---|-------|----------|---------|-------------------|-----------------|----------|---------------------|-------|-----|--------------------------------------------------------|-------------------------------------------------------------------------------------------------------------------------|-----------|
| R.C(+57.02)(+28.03)C(+57.02)DELNEMENTQ(+.98)R.C | Y    | 53.00  | 1726.6597 | 13     | 2.3  | 864.3391 | 2 | 28.76 | 1        | F1:1209 | OB5918 H6 raw.raw | 7.4015E3        | 1        | 1                   | 79    | 91  | Carbamidomethylation                                   | C1:Carbamido methylation:1 000.00; C1:Ethylation: 5.47; C2:Carbamido methylation:1 000.00; Q12:Deamidation (N Q):25.21  | PEAKS PTM |
| R.VNLKPC(+57.02)EQHIM(+15.99)QR.I               | Y    | 52.18  | 1667.8236 | 13     | 1.8  | 556.9495 | 3 | 28.32 | 3        | F3:1320 | OB5931 H6 raw.raw | 3.5343E4        | 3        | 3                   | 42    | 54  | Carbamidomethylation; Oxidation (M)                    | C6:Carbamido methylation:1 000.00; M11:Oxidation (M):10 00.00                                                           | PEAKS DB  |
| R.C(+57.02)(+28.03)C(+57.02)DELNEMEN(+.98)TQR.C | Y    | 51.55  | 1726.6597 | 13     | -0.1 | 864.3370 | 2 | 28.86 | 2        | F2:1348 | OB5930 H6 raw.raw | 9.4354E3        | 1        | 1                   | 79    | 91  | Carbamidomethylation                                   | C1:Carbamido methylation:1 000.00; C1:Ethylation: 14.04; C2:Carbamido methylation:1 000.00; N10:Deamidation (N Q):27.19 | PEAKS PTM |
| R.IMGEQEYDSY(-18.01)DIR.S                       | Y    | 51.30  | 1727.7461 | 14     | 2.3  | 864.8823 | 2 | 31.01 | 2        | F2:1485 | OB5930 H6 raw.raw | 0               | 0        | 0                   | 55    | 68  |                                                        | Y11:Dehydration:0.00                                                                                                    | PEAKS PTM |
| R.ELMNLPPQ(+.98)C(+57.02)NFR.A                  | Y    | 51.09  | 1549.7018 | 12     | 8.8  | 775.8650 | 2 | 43.21 | 1        | F1:2062 | OB5918 H6 raw.raw | 5.8655E2        | 1        | 1                   | 120   | 131 | Carbamidomethylation                                   | Q8:Deamidation (NQ): 0.00; C9:Carbamido methylation:1 000.00                                                            | PEAKS DB  |
| R.E(+53.92)LMNLPPQC(+57.02)NFR.A                | Y    | 50.16  | 1602.6370 | 12     | 0.2  | 802.3259 | 2 | 31.56 | 1        | F1:1384 | OB5918 H6 raw.raw | 0               | 0        | 0                   | 120   | 131 | Replacement of 2 protons by iron; Carbamidomethylation | E1:Replacement of 2 protons by iron: 88.04; C9:Carbamido methylation:1 000.00                                           | PEAKS PTM |

total 61 peptides

| Peptide                                      | Uniq | -10lgP | Mass      | Length | ppm  | m/z       | z | RT    | Fraction | Scan    | Source File       | Area Raw Area 6 | #Feature | #Feature Raw Area 6 | Start | End | PTM                                 | AScore                                                                                   | Found By  |
|----------------------------------------------|------|--------|-----------|--------|------|-----------|---|-------|----------|---------|-------------------|-----------------|----------|---------------------|-------|-----|-------------------------------------|------------------------------------------------------------------------------------------|-----------|
| R.C(+57.02)MC(+71.04)EALQQIMENQC(+57.02)DR.L | Y    | 50.11  | 2098.8362 | 16     | 3.8  | 1050.4293 | 2 | 34.51 | 3        | F3:1696 | OB5931 H6 raw.raw | 0               | 0        | 0                   | 92    | 107 | Carbamidomethylation                | C1:Carbamido methylation:1000.00; C3:Propionamide:0.00; C14:Carbamidomethylation:1000.00 | PEAKS PTM |
| R.QVDRVNLKPC(+57.02)EQHIMQR.I                | Y    | 50.11  | 2150.0837 | 17     | -0.7 | 538.5278  | 4 | 33.49 | 2        | F2:1625 | OB5930 H6 raw.raw | 2.7618E4        | 1        | 1                   | 38    | 54  | Carbamidomethylation                | C10:Carbamidomethylation:1000.00                                                         | PEAKS DB  |
| R.E(+21.98)LMNLPQQC(+57.02)NFR.A             | Y    | 45.41  | 1570.6997 | 12     | 0.8  | 786.3577  | 2 | 31.52 | 1        | F1:1386 | OB5918 H6 raw.raw | 9.3242E4        | 2        | 2                   | 120   | 131 | Sodium adduct; Carbamidomethylation | E1:Sodium adduct:57.72; C9:Carbamidomethylation:1000.00                                  | PEAKS PTM |
| R.IMGEQEYD(-18.01)SYDIR.S                    | Y    | 45.19  | 1727.7461 | 14     | -0.1 | 864.8802  | 2 | 31.20 | 3        | F3:1499 | OB5931 H6 raw.raw | 0               | 0        | 0                   | 55    | 68  |                                     | D9:Dehydration:8.69                                                                      | PEAKS PTM |
| R.IMGE(+21.98)QEYDSYDIR.S                    | Y    | 43.97  | 1767.7385 | 14     | 0.1  | 884.8766  | 2 | 30.72 | 3        | F3:1472 | OB5931 H6 raw.raw | 2.0226E5        | 2        | 2                   | 55    | 68  |                                     | E4:Sodium adduct:17.01                                                                   | PEAKS PTM |
| R.VNLKPC(+71.04)EQHIMQR.I                    | Y    | 42.26  | 1665.8444 | 13     | 0.2  | 556.2888  | 3 | 31.46 | 2        | F2:1497 | OB5930 H6 raw.raw | 2.2279E4        | 1        | 1                   | 42    | 54  | Propionamide                        | C6:Propionamide:1000.00                                                                  | PEAKS PTM |
| R.C(+57.02)C(+71.04)DELNEMENTQ(+.98)R.C      | Y    | 40.31  | 1712.6440 | 13     | 0.5  | 857.3297  | 2 | 28.89 | 3        | F3:1387 | OB5931 H6 raw.raw | 8.946E4         | 1        | 1                   | 79    | 91  | Carbamidomethylation                | C1:Carbamido methylation:1000.00; C2:Propionamide:0.00; Q12:Deamidation (NQ):28.86       | PEAKS PTM |
| R.ELMNLPQ(+.98)QC(+57.02)NFR.A               | Y    | 38.68  | 1549.7018 | 12     | 9.1  | 775.8652  | 2 | 43.03 | 1        | F1:2056 | OB5918 H6 raw.raw | 0               | 0        | 0                   | 120   | 131 | Carbamidomethylation                | Q7:Deamidation (NQ):12.28; C9:Carbamido methylation:1000.00                              | PEAKS DB  |

total 61 peptides



| Peptide                                                | Uniq | -10lgP | Mass      | Length | ppm  | m/z      | z | RT    | Fraction | Scan    | Source File       | Area Raw Area 6 | #Feature | #Feature Raw Area 6 | Start | End | PTM                                                          | AScore                                                                                                                    | Found By  |
|--------------------------------------------------------|------|--------|-----------|--------|------|----------|---|-------|----------|---------|-------------------|-----------------|----------|---------------------|-------|-----|--------------------------------------------------------------|---------------------------------------------------------------------------------------------------------------------------|-----------|
| R.E(+42.01)LMN(+.98)LPQQC(+57.02)NFR.A                 | Y    | 37.89  | 1591.7123 | 12     | 6.4  | 796.8685 | 2 | 29.86 | 2        | F2:1416 | OB5930 H6 raw.raw | 0               | 0        | 0                   | 120   | 131 | Acetylation (N-term); Deamidation (NQ); Carbamidomethylation | E1:Acetylation (N-term):100.00;N4:Deamidation (NQ):56.34;C9:Carbamidomethylation:1000.00                                  | PEAKS PTM |
| R.IMGEQE(+53.92)QYDSYDIR.S                             | Y    | 36.98  | 1799.6759 | 14     | 0.5  | 900.8456 | 2 | 31.02 | 1        | F1:1351 | OB5918 H6 raw.raw | 0               | 0        | 0                   | 55    | 68  |                                                              | E6:Replacement of 2 protons by iron:22.45                                                                                 | PEAKS PTM |
| R.IM(+15.99)GEQEYDSYDIRSTR.S                           | Y    | 36.12  | 2105.9324 | 17     | 1.8  | 702.9860 | 3 | 28.23 | 2        | F2:1323 | OB5930 H6 raw.raw | 1.5096E3        | 1        | 1                   | 55    | 71  | Oxidation (M)                                                | M2:Oxidation (M):1000.00                                                                                                  | PEAKS DB  |
| C.C(+57.02)D(+43.99)ELNEMENTQ(+.98)R.C                 | Y    | 35.98  | 1582.5875 | 12     | -8.0 | 792.2947 | 2 | 30.54 | 3        | F3:1456 | OB5931 H6 raw.raw | 3.9371E3        | 1        | 1                   | 80    | 91  | Carbamidomethylation; Carboxylation (DKW)                    | C1:Carbamidomethylation:1000.00;D2:Carboxylation (DKW):1000.00;Q11:Deamidation (NQ):33.91                                 | PEAKS PTM |
| R.C(+57.02)MC(+57.02)EALQ(+.98)QIMENQC(+57.02)DRLQDR.Q | Y    | 34.72  | 2598.0754 | 20     | 2.7  | 867.0348 | 3 | 39.74 | 2        | F2:1998 | OB5930 H6 raw.raw | 0               | 0        | 0                   | 92    | 111 | Carbamidomethylation                                         | C1:Carbamidomethylation:1000.00;C3:Carbamidomethylation:1000.00;Q7:Deamidation (NQ):0.00;C14:Carbamidomethylation:1000.00 | PEAKS DB  |
| R.QMVQQFKR.E                                           | Y    | 34.28  | 1063.5597 | 8      | -2.0 | 532.7861 | 2 | 27.21 | 1        | F1:1126 | OB5918 H6 raw.raw | 2.4157E4        | 2        | 2                   | 112   | 119 |                                                              |                                                                                                                           | PEAKS DB  |

total 61 peptides

| Peptide                                  | Uniq | -10lgP | Mass      | Length | ppm  | m/z      | z | RT    | Fraction | Scan    | Source File       | Area Raw Area h 6 | #Feature | #Feature Raw Area h 6 | Start | End | PTM                                 | AScore                                                                            | Found By  |
|------------------------------------------|------|--------|-----------|--------|------|----------|---|-------|----------|---------|-------------------|-------------------|----------|-----------------------|-------|-----|-------------------------------------|-----------------------------------------------------------------------------------|-----------|
| R.IM(+15.99)GEQE(+53.92)QYDSYDIR.S       | Y    | 33.87  | 1815.6708 | 14     | -0.1 | 908.8425 | 2 | 29.10 | 3        | F3:1374 | OB5931 H6 raw.raw | 0                 | 0        | 0                     | 55    | 68  | Oxidation (M)                       | M2:Oxidation (M):1000.00;E6:Replacement of 2 protons by iron:33.18                | PEAKS PTM |
| R.IMGE(+14.02)QE(+.98)YDSYDIR.S          | Y    | 33.33  | 1760.7563 | 14     | 7.2  | 881.3918 | 2 | 31.49 | 1        | F1:1379 | OB5918 H6 raw.raw | 0                 | 0        | 0                     | 55    | 68  |                                     | E4:Met hylation (other s):7.32;Q7:Deamidation (NQ):14.04                          | PEAKS PTM |
| R.E(+43.01)LMNLPQQC(+57.02)NFR.A         | Y    | 32.96  | 1591.7235 | 12     | -0.5 | 796.8687 | 2 | 30.04 | 3        | F3:1430 | OB5931 H6 raw.raw | 0                 | 0        | 0                     | 120   | 131 | Carbamylation; Carbamidomethylation | E1:Carbamylation:1000.00; C9:Carbamidomethylation:1000.00                         | PEAKS PTM |
| R.Q(-17.03)M(+15.99)VQQFKR.E             | Y    | 32.86  | 1062.5281 | 8      | -0.5 | 532.2711 | 2 | 26.15 | 3        | F3:1207 | OB5931 H6 raw.raw | 1.4877E3          | 1        | 1                     | 112   | 119 | Pyro-glu from Q; Oxidation (M)      | Q1:Pyro-glu from Q:1000.00; M2:Oxidation (M):1000.00                              | PEAKS PTM |
| C.C(+57.02)D(+21.98)E(+21.98)LNEMENTQR.C | Y    | 32.78  | 1581.5776 | 12     | 4.1  | 791.7993 | 2 | 30.09 | 3        | F3:1429 | OB5931 H6 raw.raw | 3.1759E3          | 1        | 1                     | 80    | 91  | Carbamidomethylation; Sodium adduct | C1:Carbamidomethylation:1000.00; D2:Sodium adduct:51.96; E3:Sodium adduct:65.81   | PEAKS PTM |
| R.I(+43.01)MGEQEYDSYDIR.S                | Y    | 31.44  | 1788.7625 | 14     | 5.9  | 895.3937 | 2 | 29.69 | 3        | F3:1409 | OB5931 H6 raw.raw | 0                 | 0        | 0                     | 55    | 68  | Carbamylation                       | I1:Carbamylation:1000.00                                                          | PEAKS PTM |
| R.C(+71.04)C(+57.02)DELNEMEN(+.98)TQR.C  | Y    | 30.87  | 1712.6440 | 13     | 0.3  | 857.3296 | 2 | 28.68 | 2        | F2:1374 | OB5930 H6 raw.raw | 8.661E4           | 1        | 1                     | 79    | 91  | Carbamidomethylation                | C1:Propionamide:7.65; C2:Carbamidomethylation:1000.00; N10:Deamidation (NQ):20.41 | PEAKS PTM |

total 61 peptides

| Peptide                                                          | Uniq | -10lgP | Mass      | Length | ppm | m/z       | z | RT    | Fraction | Scan    | Source File       | Area Raw Area 6 | #Feature | #Feature Raw Area 6 | Start | End | PTM                                                    | AScore                                                                                                                                         | Found By  |
|------------------------------------------------------------------|------|--------|-----------|--------|-----|-----------|---|-------|----------|---------|-------------------|-----------------|----------|---------------------|-------|-----|--------------------------------------------------------|------------------------------------------------------------------------------------------------------------------------------------------------|-----------|
| C.M(+175.04)C(+57.02)EALQQIMENQC(+57.02)DR.L                     | Y    | 30.83  | 2099.8323 | 15     | 6.2 | 1050.9299 | 2 | 34.47 | 2        | F2:1687 | OB5930 H6 raw.raw | 1.8085E3        | 1        | 1                   | 93    | 107 | Naphthalene-2,3-dicarboxaldehyde; Carbamidomethylation | M1:Naphthalene-2,3-dicarboxaldehyde:1000.00;C2:Carbamidomethylation:1000.00;C13:Carbamidomethylation:1000.00                                   | PEAKS PTM |
| R.C(+57.02)MC(+57.02)EALQQIM(+15.99)ENQC(+57.02)D(-18.01)RLQDR.Q | Y    | 30.45  | 2595.0757 | 20     | 2.6 | 866.0348  | 3 | 34.46 | 1        | F1:1551 | OB5918 H6 raw.raw | 3.0045E4        | 1        | 1                   | 92    | 111 | Carbamidomethylation; Oxidation (M)                    | C1:Carbamidomethylation:1000.00;C3:Carbamidomethylation:1000.00;M10:Oxidation (M):99.62;C14:Carbamidomethylation:1000.00;D15:Dehydration:19.86 | PEAKS PTM |
| total 61 peptides                                                |      |        |           |        |     |           |   |       |          |         |                   |                 |          |                     |       |     |                                                        |                                                                                                                                                |           |

sp|Q647G9|CONG\_ARAHY

[back to list](#)

| [Protein Coverage](#) | [Supporting Peptides](#) |

Protein Coverage:

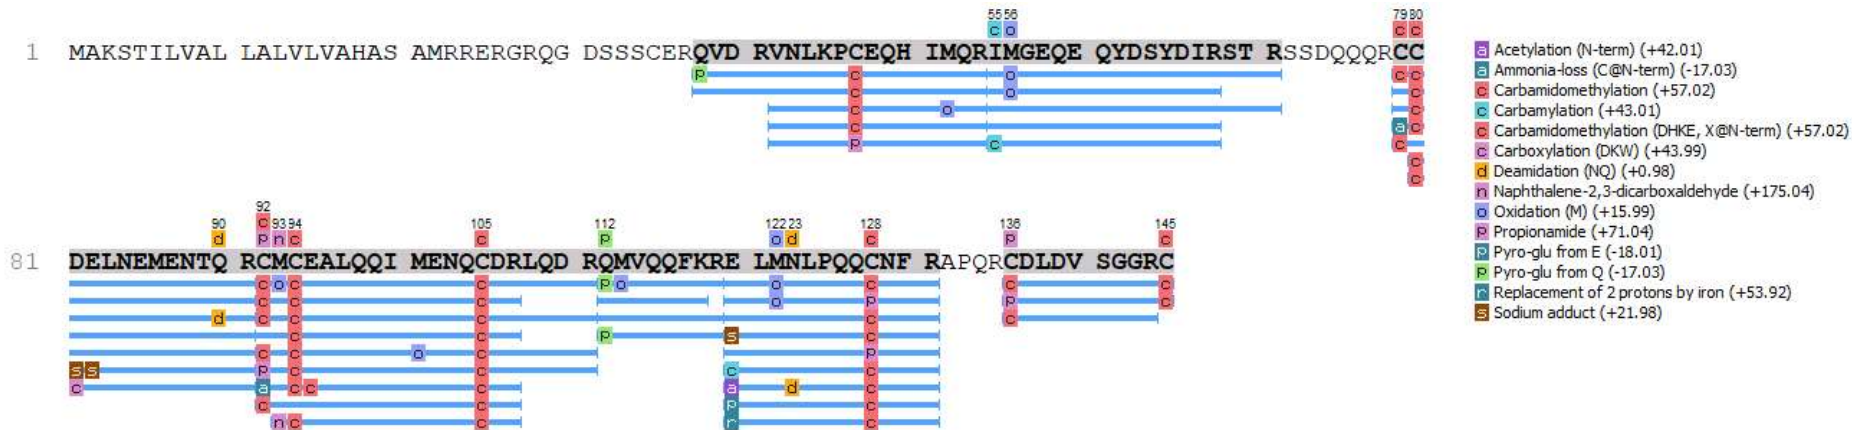

Supporting Peptides:

| Peptide                                      | Uniq | -10lgP | Mass      | Length | ppm | m/z       | z | RT    | Fraction | Scan    | Source File       | Area Raw Area 6 | #Feature | #Feature Raw Area 6 | Start | End | PTM                                 | AScore                                                                                             | Found By  |
|----------------------------------------------|------|--------|-----------|--------|-----|-----------|---|-------|----------|---------|-------------------|-----------------|----------|---------------------|-------|-----|-------------------------------------|----------------------------------------------------------------------------------------------------|-----------|
| R.ELMNLPQQC(+57.02)NFR.A                     | Y    | 200.00 | 1548.7177 | 12     | 2.7 | 775.3682  | 2 | 31.64 | 2        | F2:1514 | OB5930 H6 raw.raw | 1.002E7         | 12       | 12                  | 120   | 131 | Carbamidomethylation                | C9:Carbamidomethylation:1000.00                                                                    | PEAKS DB  |
| R.C(+57.02)MC(+57.02)EALQQIMENQC(+57.02)DR.L | Y    | 200.00 | 2084.8206 | 16     | 4.1 | 1043.4219 | 2 | 34.27 | 1        | F1:1540 | OB5918 H6 raw.raw | 1.0292E5        | 5        | 5                   | 92    | 107 | Carbamidomethylation                | C1:Carbamidomethylation:1000.00; C3:Carbamidomethylation:1000.00; C14:Carbamidomethylation:1000.00 | PEAKS DB  |
| R.IM(+15.99)GEQEYDSYDIR.S                    | Y    | 159.99 | 1761.7516 | 14     | 2.3 | 881.8851  | 2 | 29.04 | 2        | F2:1368 | OB5930 H6 raw.raw | 2.8909E6        | 4        | 4                   | 55    | 68  | Oxidation (M)                       | M2:Oxidation (M):1000.00                                                                           | PEAKS DB  |
| R.IMGEQEYDSYDIR.S                            | Y    | 149.03 | 1745.7566 | 14     | 2.9 | 873.8881  | 2 | 30.57 | 2        | F2:1471 | OB5930 H6 raw.raw | 1.5582E7        | 25       | 25                  | 55    | 68  |                                     |                                                                                                    | PEAKS DB  |
| R.ELM(+15.99)NLPQQC(+57.02)NFR.A             | Y    | 122.17 | 1564.7126 | 12     | 1.2 | 783.3645  | 2 | 29.23 | 2        | F2:1369 | OB5930 H6 raw.raw | 1.279E6         | 4        | 4                   | 120   | 131 | Oxidation (M); Carbamidomethylation | M3:Oxidation (M):1000.00; C9:Carbamidomethylation:1000.00                                          | PEAKS DB  |
| R.ELMNLPQQC(+71.04)NFR.A                     | Y    | 115.59 | 1562.7334 | 12     | 0.5 | 782.3744  | 2 | 31.70 | 1        | F1:1393 | OB5918 H6 raw.raw | 3.6232E5        | 3        | 3                   | 120   | 131 | Propionamide                        | C9:Propionamide:1000.00                                                                            | PEAKS PTM |

total 61 peptides

| Peptide                                              | Uniq | -10lgP | Mass      | Length | ppm  | m/z       | z | RT    | Fraction | Scan    | Source File       | Area Raw Area h 6 | #Feature | #Feature Raw Area h 6 | Start | End | PTM                                                                                  | AScore                                                                                                                                                        | Found By  |
|------------------------------------------------------|------|--------|-----------|--------|------|-----------|---|-------|----------|---------|-------------------|-------------------|----------|-----------------------|-------|-----|--------------------------------------------------------------------------------------|---------------------------------------------------------------------------------------------------------------------------------------------------------------|-----------|
| R.C(+57.02)C(+57.02)DELNEMENTQR.C                    | Y    | 112.33 | 1697.6444 | 13     | 1.2  | 849.8305  | 2 | 28.10 | 1        | F1:1153 | OB5918 H6 raw.raw | 1.5792E5          | 3        | 3                     | 79    | 91  | Carbamidomethylation                                                                 | C1:Carbamido methylation:1 000.00; C2:Carbamido methylation:1 000.00                                                                                          | PEAKS DB  |
| R.C(+57.02)DLDVSGGRC(+57.02)                         | Y    | 106.51 | 1137.4543 | 10     | 0.3  | 569.7346  | 2 | 25.66 | 3        | F3:1179 | OB5931 H6 raw.raw | 3.6673E4          | 3        | 3                     | 136   | 145 | Carbamidomethylation                                                                 | C1:Carbamido methylation:1 000.00; C10:Carbamidomethylation:1 000.00                                                                                          | PEAKS DB  |
| R.C(+57.02)MC(+57.02)EALQQIMENQC(+57.02)DRLQDR.Q     | Y    | 104.61 | 2597.0913 | 20     | 1.7  | 866.7058  | 3 | 35.32 | 2        | F2:1730 | OB5930 H6 raw.raw | 2.9307E6          | 5        | 5                     | 92    | 111 | Carbamidomethylation                                                                 | C1:Carbamido methylation:1 000.00; C3:Carbamido methylation:1 000.00; C14:Carbamidomethylation:1 000.00                                                       | PEAKS DB  |
| R.VNLKPC(+57.02)EQHIMQR.I                            | Y    | 99.65  | 1651.8286 | 13     | -0.1 | 551.6168  | 3 | 31.27 | 2        | F2:1515 | OB5930 H6 raw.raw | 1.3033E6          | 6        | 6                     | 42    | 54  | Carbamidomethylation                                                                 | C6:Carbamido methylation:1 000.00                                                                                                                             | PEAKS DB  |
| R.C(-17.03)MC(+57.02)E(+57.02)ALQQIMENQC(+57.02)DR.L | Y    | 98.03  | 2067.7942 | 16     | 2.3  | 1034.9067 | 2 | 39.07 | 2        | F2:1959 | OB5930 H6 raw.raw | 3.2701E4          | 3        | 3                     | 92    | 107 | Ammonia-loss (C@N-term); Carbamidomethylation; Carbamidomethylation (DHKE, X@N-term) | C1:Ammonia-loss (C@N-term):100 0.00; C3:Carbamido methylation:1 000.00; E4:Carbamido methylation (DHKE, X@N-term):19 4.40; C14:Carbamido methylation:1 000.00 | PEAKS PTM |

total 61 peptides

| Peptide                                                  | Uniq | -10lgP | Mass      | Length | ppm | m/z       | z | RT    | Fraction | Scan    | Source File       | Area Raw Area 6 | #Feature | #Feature Raw Area 6 | Start | End | PTM                                 | AScore                                                                                                                      | Found By  |
|----------------------------------------------------------|------|--------|-----------|--------|-----|-----------|---|-------|----------|---------|-------------------|-----------------|----------|---------------------|-------|-----|-------------------------------------|-----------------------------------------------------------------------------------------------------------------------------|-----------|
| R.C(+57.02)M(+15.99)C(+57.02)EALQQIMENQC(+57.02)DRLQDR.Q | Y    | 97.13  | 2613.0862 | 20     | 1.6 | 872.0374  | 3 | 33.15 | 1        | F1:1482 | OB5918 H6 raw.raw | 6.1802E5        | 3        | 3                   | 92    | 111 | Carbamidomethylation; Oxidation (M) | C1:Carbamidomethylation:1000.00; M2:Oxidation (M):131.34; C3:Carbamidomethylation:1000.00; C14:Carbamidomethylation:1000.00 | PEAKS DB  |
| R.C(+71.04)MC(+57.02)EALQQIMENQC(+57.02)DR.L             | Y    | 91.03  | 2098.8362 | 16     | 4.1 | 1050.4297 | 2 | 34.27 | 1        | F1:1549 | OB5918 H6 raw.raw | 8.2569E3        | 1        | 1                   | 92    | 107 | Carbamidomethylation                | C1:Propionamide:22.85; C3:Carbamidomethylation:1000.00; C14:Carbamidomethylation:1000.00                                    | PEAKS PTM |
| R.C(+71.04)MC(+57.02)EALQQIMENQC(+57.02)DRLQDR.Q         | Y    | 90.77  | 2611.1069 | 20     | 0.5 | 871.3766  | 3 | 34.84 | 1        | F1:1571 | OB5918 H6 raw.raw | 3.7421E5        | 1        | 1                   | 92    | 111 | Propionamide; Carbamidomethylation  | C1:Propionamide:54.01; C3:Carbamidomethylation:1000.00; C14:Carbamidomethylation:1000.00                                    | PEAKS PTM |
| R.C(+57.02)C(+57.02)DELNEMENTQ(+.98)R.C                  | Y    | 90.49  | 1698.6284 | 13     | 1.2 | 850.3225  | 2 | 28.66 | 2        | F2:1327 | OB5930 H6 raw.raw | 2.5004E5        | 3        | 3                   | 79    | 91  | Carbamidomethylation                | C1:Carbamidomethylation:1000.00; C2:Carbamidomethylation:1000.00; Q12:Deamidation (NQ):36.05                                | PEAKS DB  |

total 61 peptides

| Peptide                                   | Uniq | -10lgP | Mass      | Length | ppm | m/z      | z | RT    | Fraction | Scan    | Source File       | Area Raw Area h 6 | #Feature | #Feature Raw Area h 6 | Start | End | PTM                                    | AScore                                                                              | Found By  |
|-------------------------------------------|------|--------|-----------|--------|-----|----------|---|-------|----------|---------|-------------------|-------------------|----------|-----------------------|-------|-----|----------------------------------------|-------------------------------------------------------------------------------------|-----------|
| R.C(+71.04)C(+57.02)DELNEMENTQR.C         | Y    | 89.19  | 1711.6600 | 13     | 0.6 | 856.8378 | 2 | 28.19 | 2        | F2:1295 | OB5930 H6 raw.raw | 1.4647E5          | 3        | 3                     | 79    | 91  | Carbamidomethylation                   | C1:Propionamide:10.11;C2:Carbamidomethylation:1000.00                               | PEAKS PTM |
| R.C(+71.04)DLDVSGGRC(+57.02)              | Y    | 86.72  | 1151.4700 | 10     | 3.6 | 576.7443 | 2 | 25.80 | 1        | F1:1058 | OB5918 H6 raw.raw | 7.0267E3          | 2        | 2                     | 136   | 145 | Propionamide; Carbamidomethylation     | C1:Propionamide:123.21;C10:Carbamidomethylation:1000.00                             | PEAKS PTM |
| R.Q(-17.03)MVQQFKR.E                      | Y    | 81.09  | 1046.5331 | 8      | 1.5 | 524.2746 | 2 | 28.32 | 1        | F1:1185 | OB5918 H6 raw.raw | 2.0304E5          | 3        | 3                     | 112   | 119 | Pyro-glu from Q                        | Q1:Pyro-glu from Q:1000.00                                                          | PEAKS PTM |
| R.C(+57.02)(+28.03)C(+57.02)DELNEMENTQR.C | Y    | 76.48  | 1725.6757 | 13     | 0.1 | 863.8452 | 2 | 28.26 | 2        | F2:1306 | OB5930 H6 raw.raw | 1.2726E4          | 2        | 2                     | 79    | 91  | Carbamidomethylation                   | C1:Carbamidomethylation:1000.00;C1:Ethylation:13.67;C2:Carbamidomethylation:1000.00 | PEAKS PTM |
| R.C(+71.04)C(+57.02)DELNEMENTQ(+.98)R.C   | Y    | 73.91  | 1712.6440 | 13     | 0.5 | 857.3297 | 2 | 28.89 | 3        | F3:1347 | OB5931 H6 raw.raw | 2.4957E5          | 3        | 3                     | 79    | 91  | Carbamidomethylation; Deamidation (NQ) | C1:Propionamide:12.28;C2:Carbamidomethylation:1000.00;Q12:Deamidation (NQ):56.37    | PEAKS PTM |
| R.C(+57.02)C(+71.04)DELNEMENTQR.C         | Y    | 73.29  | 1711.6600 | 13     | 2.8 | 856.8397 | 2 | 28.39 | 2        | F2:1328 | OB5930 H6 raw.raw | 5.119E4           | 1        | 1                     | 79    | 91  | Carbamidomethylation                   | C1:Carbamidomethylation:1000.00;C2:Propionamide:12.28                               | PEAKS PTM |

total 61 peptides

| Peptide                                   | Uniq | -10lgP | Mass      | Length | ppm  | m/z      | z | RT    | Fraction | Scan    | Source File       | Area Raw Area h 6 | #Feature | #Feature Raw Area h 6 | Start | End | PTM                                           | AScore                                                                                                           | Found By  |
|-------------------------------------------|------|--------|-----------|--------|------|----------|---|-------|----------|---------|-------------------|-------------------|----------|-----------------------|-------|-----|-----------------------------------------------|------------------------------------------------------------------------------------------------------------------|-----------|
| R.C(-17.03)C(+57.02)D(+57.02)ELNEMENTQR.C | Y    | 72.79  | 1680.6178 | 13     | 1.3  | 841.3173 | 2 | 32.42 | 1        | F1:1439 | OB5918 H6 raw.raw | 9.4578E3          | 1        | 1                     | 79    | 91  | Ammonia-loss (C@N-term); Carbamidomethylation | C1:Ammonia-loss (C@N-term):100.00;C2:Carbamidomethylation:1000.00;D3:Carbamidomethylation (DHKE, X@N-term):12.28 | PEAKS PTM |
| R.C(+57.02)DLDVSGGR.C                     | Y    | 69.89  | 977.4236  | 9      | -0.8 | 489.7187 | 2 | 24.72 | 1        | F1:1012 | OB5918 H6 raw.raw | 0                 | 0        | 0                     | 136   | 144 | Carbamidomethylation                          | C1:Carbamidomethylation:1000.00                                                                                  | PEAKS DB  |
| R.IMGEQEYDSYDIRSTR.S                      | Y    | 68.55  | 2089.9375 | 17     | 2.6  | 697.6549 | 3 | 29.87 | 1        | F1:1284 | OB5918 H6 raw.raw | 7.5645E4          | 3        | 3                     | 55    | 71  |                                               |                                                                                                                  | PEAKS DB  |
| R.Q(-17.03)VDRVNLKPC(+57.02)EQHIMQR.I     | Y    | 67.85  | 2133.0571 | 17     | 1.7  | 534.2725 | 4 | 31.34 | 1        | F1:1372 | OB5918 H6 raw.raw | 3.0682E5          | 2        | 2                     | 38    | 54  | Pyro-glu from Q; Carbamidomethylation         | Q1:Pyro-glu from Q:1000.00;C10:Carbamidomethylation:1000.00                                                      | PEAKS PTM |
| R.IMGEQE(+21.98)QYDSYDIR.S                | Y    | 66.88  | 1767.7385 | 14     | 1.6  | 884.8780 | 2 | 30.42 | 2        | F2:1450 | OB5930 H6 raw.raw | 0                 | 0        | 0                     | 55    | 68  |                                               | E6:Sodium adduct:12.81                                                                                           | PEAKS PTM |
| R.ELM(+15.99)NLPQQC(+71.04)NFR.A          | Y    | 64.44  | 1578.7283 | 12     | 0.7  | 790.3719 | 2 | 29.48 | 2        | F2:1390 | OB5930 H6 raw.raw | 1.3436E4          | 2        | 2                     | 120   | 131 | Oxidation (M); Propionamide                   | M3:Oxidation (M):100.00;C9:Propionamide:100.00                                                                   | PEAKS PTM |
| R.E(-18.01)LMNLPQQC(+57.02)NFR.A          | Y    | 61.73  | 1530.7072 | 12     | 1.2  | 766.3618 | 2 | 35.00 | 2        | F2:1722 | OB5930 H6 raw.raw | 0                 | 0        | 0                     | 120   | 131 | Pyro-glu from E; Carbamidomethylation         | E1:Pyro-glu from E:100.00;C9:Carbamidomethylation:1000.00                                                        | PEAKS PTM |
| R.IMGEQEQ(+.98)YDSYDIR.S                  | Y    | 56.51  | 1746.7406 | 14     | 5.7  | 874.3826 | 2 | 40.55 | 3        | F3:2044 | OB5931 H6 raw.raw | 0                 | 0        | 0                     | 55    | 68  |                                               | Q7:Deamidation (NQ):19.68                                                                                        | PEAKS DB  |

total 61 peptides



| Peptide                                              | Uniq | -10lgP | Mass      | Length | ppm  | m/z       | z | RT    | Fraction | Scan    | Source File       | Area Raw Area 6 | #Feature | #Feature Raw Area 6 | Start | End | PTM                                 | AScore                                                                                                                     | Found By  |
|------------------------------------------------------|------|--------|-----------|--------|------|-----------|---|-------|----------|---------|-------------------|-----------------|----------|---------------------|-------|-----|-------------------------------------|----------------------------------------------------------------------------------------------------------------------------|-----------|
| R.C(+57.02)M(+15.99)C(+57.02)EALQQIMENQC(+57.02)DR.L | Y    | 54.61  | 2100.8157 | 16     | 6.8  | 1051.4222 | 2 | 32.37 | 3        | F3:1570 | OB5931 H6 raw.raw | 0               | 0        | 0                   | 92    | 107 | Carbamidomethylation                | C1:Carbamidomethylation:1000.00; M2:Oxidation (M):43.13; C3:Carbamidomethylation:1000.00; C14:Carbamidomethylation:1000.00 | PEAKS DB  |
| R.IMGEQ(+.98)EQYDSYDIR.S                             | Y    | 54.23  | 1746.7406 | 14     | 9.5  | 874.3859  | 2 | 40.80 | 1        | F1:1928 | OB5918 H6 raw.raw | 1.3457E3        | 1        | 1                   | 55    | 68  |                                     | Q5:Deamidation (NQ):26.31                                                                                                  | PEAKS DB  |
| R.QMVQQFK.R                                          | Y    | 53.65  | 907.4586  | 7      | -0.3 | 454.7364  | 2 | 26.28 | 1        | F1:1080 | OB5918 H6 raw.raw | 1.4384E4        | 3        | 3                   | 112   | 118 |                                     |                                                                                                                            | PEAKS DB  |
| R.C(+57.02)(+28.03)C(+57.02)DELNEMENTQ(+.98)R.C      | Y    | 53.00  | 1726.6597 | 13     | 2.3  | 864.3391  | 2 | 28.76 | 1        | F1:1209 | OB5918 H6 raw.raw | 7.4015E3        | 1        | 1                   | 79    | 91  | Carbamidomethylation                | C1:Carbamidomethylation:1000.00; C1:Ethylation:5.47; C2:Carbamidomethylation:1000.00; Q12:Deamidation (NQ):25.21           | PEAKS PTM |
| R.VNLKPC(+57.02)EQHIM(+15.99)QR.I                    | Y    | 52.18  | 1667.8236 | 13     | 1.8  | 556.9495  | 3 | 28.32 | 3        | F3:1320 | OB5931 H6 raw.raw | 3.5343E4        | 3        | 3                   | 42    | 54  | Carbamidomethylation; Oxidation (M) | C6:Carbamidomethylation:1000.00; M11:Oxidation (M):1000.00                                                                 | PEAKS DB  |

total 61 peptides

| Peptide                                         | Uniq | -10lgP | Mass      | Length | ppm  | m/z       | z | RT    | Fraction | Scan    | Source File       | Area Raw Area 6 | #Feature | #Feature Raw Area 6 | Start | End | PTM                                                    | AScore                                                                                                                   | Found By  |
|-------------------------------------------------|------|--------|-----------|--------|------|-----------|---|-------|----------|---------|-------------------|-----------------|----------|---------------------|-------|-----|--------------------------------------------------------|--------------------------------------------------------------------------------------------------------------------------|-----------|
| R.C(+57.02)(+28.03)C(+57.02)DELNEMEN(+.98)TQR.C | Y    | 51.55  | 1726.6597 | 13     | -0.1 | 864.3370  | 2 | 28.86 | 2        | F2:1348 | OB5930 H6 raw.raw | 9,4354E3        | 1        | 1                   | 79    | 91  | Carbamidomethylation                                   | C1:Carbamido methylation:1 000.00; C1:Eth ylation:14.04; C2:Carbamido methylation:1 000.00; N10:De amidation (N Q):27.19 | PEAKS PTM |
| R.IMGEQEQYDSY(-18.01)DIR.S                      | Y    | 51.30  | 1727.7461 | 14     | 2.3  | 864.8823  | 2 | 31.01 | 2        | F2:1485 | OB5930 H6 raw.raw | 0               | 0        | 0                   | 55    | 68  |                                                        | Y11:De hydration:0.00                                                                                                    | PEAKS PTM |
| R.ELMNLPPQ(+.98)C(+57.02)NFR.A                  | Y    | 51.09  | 1549.7018 | 12     | 8.8  | 775.8650  | 2 | 43.21 | 1        | F1:2062 | OB5918 H6 raw.raw | 5.8655E2        | 1        | 1                   | 120   | 131 | Carbamidomethylation                                   | Q8:Deamidation (NQ):0.00; C9:Carbamido methylation:1 000.00                                                              | PEAKS DB  |
| R.E(+53.92)LMNLPPQC(+57.02)NFR.A                | Y    | 50.16  | 1602.6370 | 12     | 0.2  | 802.3259  | 2 | 31.56 | 1        | F1:1384 | OB5918 H6 raw.raw | 0               | 0        | 0                   | 120   | 131 | Replacement of 2 protons by iron; Carbamidomethylation | E1:Replacement of 2 protons by iron:88.04; C9:Carbamido methylation:1 000.00                                             | PEAKS PTM |
| R.C(+57.02)MC(+71.04)EALQQIMENQC(+57.02)DR.L    | Y    | 50.11  | 2098.8362 | 16     | 3.8  | 1050.4293 | 2 | 34.51 | 3        | F3:1696 | OB5931 H6 raw.raw | 0               | 0        | 0                   | 92    | 107 | Carbamidomethylation                                   | C1:Carbamido methylation:1 000.00; C3:Pro pionamide:0.00; C14:Carbam idomet hylatio n:1000.00                            | PEAKS PTM |
| R.QVDRVNLKPC(+57.02)EQHIMQR.I                   | Y    | 50.11  | 2150.0837 | 17     | -0.7 | 538.5278  | 4 | 33.49 | 2        | F2:1625 | OB5930 H6 raw.raw | 2.7618E4        | 1        | 1                   | 38    | 54  | Carbamidomethylation                                   | C10:Carbamid omethylation:1 000.00                                                                                       | PEAKS DB  |

total 61 peptides

| Peptide                                 | Uniq | -10lgP | Mass      | Length | ppm  | m/z      | z | RT    | Fraction | Scan    | Source File       | Area Raw Area 6 | #Feature | #Feature Raw Area 6 | Start | End | PTM                                                          | AScore                                                                                   | Found By  |
|-----------------------------------------|------|--------|-----------|--------|------|----------|---|-------|----------|---------|-------------------|-----------------|----------|---------------------|-------|-----|--------------------------------------------------------------|------------------------------------------------------------------------------------------|-----------|
| R.E(+21.98)LMNLPQQC(+57.02)NFR.A        | Y    | 45.41  | 1570.6997 | 12     | 0.8  | 786.3577 | 2 | 31.52 | 1        | F1:1386 | OB5918 H6 raw.raw | 9.3242E4        | 2        | 2                   | 120   | 131 | Sodium adduct; Carbamidomethylation                          | E1:Sodium adduct:57.72;C9:Carbamidomethylation:1000.00                                   | PEAKS PTM |
| R.IMGEQEYD(-18.01)SYDIR.S               | Y    | 45.19  | 1727.7461 | 14     | -0.1 | 864.8802 | 2 | 31.20 | 3        | F3:1499 | OB5931 H6 raw.raw | 0               | 0        | 0                   | 55    | 68  |                                                              | D9:Dehydration:8.69                                                                      | PEAKS PTM |
| R.IMGE(+21.98)QEYDSYDIR.S               | Y    | 43.97  | 1767.7385 | 14     | 0.1  | 884.8766 | 2 | 30.72 | 3        | F3:1472 | OB5931 H6 raw.raw | 2.0226E5        | 2        | 2                   | 55    | 68  |                                                              | E4:Sodium adduct:17.01                                                                   | PEAKS PTM |
| R.VNLKPC(+71.04)EQHIMQR.I               | Y    | 42.26  | 1665.8444 | 13     | 0.2  | 556.2888 | 3 | 31.46 | 2        | F2:1497 | OB5930 H6 raw.raw | 2.2279E4        | 1        | 1                   | 42    | 54  | Propionamide                                                 | C6:Propionamide:100.00                                                                   | PEAKS PTM |
| R.C(+57.02)C(+71.04)DELNEMENTQ(+.98)R.C | Y    | 40.31  | 1712.6440 | 13     | 0.5  | 857.3297 | 2 | 28.89 | 3        | F3:1387 | OB5931 H6 raw.raw | 8.946E4         | 1        | 1                   | 79    | 91  | Carbamidomethylation                                         | C1:Carbamidomethylation:1000.00;C2:Propionamide:0.00;Q12:Deamidation (NQ):28.86          | PEAKS PTM |
| R.ELMNLPQ(+.98)QC(+57.02)NFR.A          | Y    | 38.68  | 1549.7018 | 12     | 9.1  | 775.8652 | 2 | 43.03 | 1        | F1:2056 | OB5918 H6 raw.raw | 0               | 0        | 0                   | 120   | 131 | Carbamidomethylation                                         | Q7:Deamidation (NQ):12.28;C9:Carbamidomethylation:1000.00                                | PEAKS DB  |
| R.E(+42.01)LMN(+.98)LPQQC(+57.02)NFR.A  | Y    | 37.89  | 1591.7123 | 12     | 6.4  | 796.8685 | 2 | 29.86 | 2        | F2:1416 | OB5930 H6 raw.raw | 0               | 0        | 0                   | 120   | 131 | Acetylation (N-term); Deamidation (NQ); Carbamidomethylation | E1:Acetylation (N-term):100.00;N4:Deamidation (NQ):56.34;C9:Carbamidomethylation:1000.00 | PEAKS PTM |
| R.IMGEQE(+53.92)QYDSYDIR.S              | Y    | 36.98  | 1799.6759 | 14     | 0.5  | 900.8456 | 2 | 31.02 | 1        | F1:1351 | OB5918 H6 raw.raw | 0               | 0        | 0                   | 55    | 68  |                                                              | E6:Replacement of 2 protons by iron:22.45                                                | PEAKS PTM |
| R.IM(+15.99)GEQEYDSYDIRSTR.S            | Y    | 36.12  | 2105.9324 | 17     | 1.8  | 702.9860 | 3 | 28.23 | 2        | F2:1323 | OB5930 H6 raw.raw | 1.5096E3        | 1        | 1                   | 55    | 71  | Oxidation (M)                                                | M2:Oxidation (M):100.00                                                                  | PEAKS DB  |

total 61 peptides

| Peptide                                                | Uniq | -10lgP | Mass      | Length | ppm  | m/z      | z | RT    | Fraction | Scan    | Source File       | Area Raw Area 6 | #Feature | #Feature Raw Area 6 | Start | End | PTM                                       | AScore                                                                                                                       | Found By  |
|--------------------------------------------------------|------|--------|-----------|--------|------|----------|---|-------|----------|---------|-------------------|-----------------|----------|---------------------|-------|-----|-------------------------------------------|------------------------------------------------------------------------------------------------------------------------------|-----------|
| C.C(+57.02)D(+43.99)ELNEMENTQ(+.98)R.C                 | Y    | 35.98  | 1582.5875 | 12     | -8.0 | 792.2947 | 2 | 30.54 | 3        | F3:1456 | OB5931 H6 raw.raw | 3.9371E3        | 1        | 1                   | 80    | 91  | Carbamidomethylation; Carboxylation (DKW) | C1:Carbamidomethylation:1000.00; D2:Carboxylation (DKW):1000.00; Q11:Deamidation (NQ):33.91                                  | PEAKS PTM |
| R.C(+57.02)MC(+57.02)EALQ(+.98)QIMENQC(+57.02)DRLQDR.Q | Y    | 34.72  | 2598.0754 | 20     | 2.7  | 867.0348 | 3 | 39.74 | 2        | F2:1998 | OB5930 H6 raw.raw | 0               | 0        | 0                   | 92    | 111 | Carbamidomethylation                      | C1:Carbamidomethylation:1000.00; C3:Carbamidomethylation:1000.00; Q7:Deamidation (NQ):0.00; C14:Carbamidomethylation:1000.00 | PEAKS DB  |
| R.QMVQQFKR.E                                           | Y    | 34.28  | 1063.5597 | 8      | -2.0 | 532.7861 | 2 | 27.21 | 1        | F1:1126 | OB5918 H6 raw.raw | 2.4157E4        | 2        | 2                   | 112   | 119 |                                           |                                                                                                                              | PEAKS DB  |
| R.IM(+15.99)GEQE(+53.92)QYDSYDIR.S                     | Y    | 33.87  | 1815.6708 | 14     | -0.1 | 908.8425 | 2 | 29.10 | 3        | F3:1374 | OB5931 H6 raw.raw | 0               | 0        | 0                   | 55    | 68  | Oxidation (M)                             | M2:Oxidation (M):1000.00; E6:Replacement of 2 protons by iron:33.18                                                          | PEAKS PTM |
| R.IMGE(+14.02)QEQ(+.98)YDSYDIR.S                       | Y    | 33.33  | 1760.7563 | 14     | 7.2  | 881.3918 | 2 | 31.49 | 1        | F1:1379 | OB5918 H6 raw.raw | 0               | 0        | 0                   | 55    | 68  |                                           | E4:Metallation (others):7.32; Q7:Deamidation (NQ):14.04                                                                      | PEAKS PTM |
| R.E(+43.01)LMNLPQQC(+57.02)NFR.A                       | Y    | 32.96  | 1591.7235 | 12     | -0.5 | 796.8687 | 2 | 30.04 | 3        | F3:1430 | OB5931 H6 raw.raw | 0               | 0        | 0                   | 120   | 131 | Carbamylation; Carbamidomethylation       | E1:Carbamylation:1000.00; C9:Carbamidomethylation:1000.00                                                                    | PEAKS PTM |

total 61 peptides

| Peptide                                      | Uniq | -10lgP | Mass      | Length | ppm  | m/z       | z | RT    | Fraction | Scan    | Source File       | Area Raw Area H6 | #Feature | #Feature Raw Area H6 | Start | End | PTM                                                    | AScore                                                                                                         | Found By  |
|----------------------------------------------|------|--------|-----------|--------|------|-----------|---|-------|----------|---------|-------------------|------------------|----------|----------------------|-------|-----|--------------------------------------------------------|----------------------------------------------------------------------------------------------------------------|-----------|
| R.Q(-17.03)M(+15.99)VQQFKR.E                 | Y    | 32.86  | 1062.5281 | 8      | -0.5 | 532.2711  | 2 | 26.15 | 3        | F3:1207 | OB5931 H6 raw.raw | 1.4877E3         | 1        | 1                    | 112   | 119 | Pyro-glu from Q; Oxidation (M)                         | Q1:Pyro-glu from Q:1000.00; M2:Oxidation (M):1000.00                                                           | PEAKS PTM |
| C.C(+57.02)D(+21.98)E(+21.98)LNEMENTQR.C     | Y    | 32.78  | 1581.5776 | 12     | 4.1  | 791.7993  | 2 | 30.09 | 3        | F3:1429 | OB5931 H6 raw.raw | 3.1759E3         | 1        | 1                    | 80    | 91  | Carbamidomethylation; Sodium adduct                    | C1:Carbamidomethylation:1000.00; D2:Sodium adduct:51.96; E3:Sodium adduct:65.81                                | PEAKS PTM |
| R.I(+43.01)MGEQEYDSYDIR,S                    | Y    | 31.44  | 1788.7625 | 14     | 5.9  | 895.3937  | 2 | 29.69 | 3        | F3:1409 | OB5931 H6 raw.raw | 0                | 0        | 0                    | 55    | 68  | Carbamylation                                          | I1:Carbamylation:1000.00                                                                                       | PEAKS PTM |
| R.C(+71.04)C(+57.02)DELNEMEN(+.98)TQR.C      | Y    | 30.87  | 1712.6440 | 13     | 0.3  | 857.3296  | 2 | 28.68 | 2        | F2:1374 | OB5930 H6 raw.raw | 8.661E4          | 1        | 1                    | 79    | 91  | Carbamidomethylation                                   | C1:Propionamide:7.65; C2:Carbamidomethylation:1000.00; N10:Deamidation (NQ):20.41                              | PEAKS PTM |
| C.M(+175.04)C(+57.02)EALQQIMENQC(+57.02)DR.L | Y    | 30.83  | 2099.8323 | 15     | 6.2  | 1050.9299 | 2 | 34.47 | 2        | F2:1687 | OB5930 H6 raw.raw | 1.8085E3         | 1        | 1                    | 93    | 107 | Naphthalene-2,3-dicarboxaldehyde; Carbamidomethylation | M1:Naphthalene-2,3-dicarboxaldehyde:1000.00; C2:Carbamidomethylation:1000.00; C13:Carbamidomethylation:1000.00 | PEAKS PTM |

total 61 peptides

| Peptide                                                          | Uniq | -10lgP | Mass      | Length | ppm | m/z      | z | RT    | Fraction | Scan    | Source File       | Area Raw Area 6 | #Feature | #Feature Raw Area 6 | Start | End | PTM                                 | AScore                                                                                                                                             | Found By  |
|------------------------------------------------------------------|------|--------|-----------|--------|-----|----------|---|-------|----------|---------|-------------------|-----------------|----------|---------------------|-------|-----|-------------------------------------|----------------------------------------------------------------------------------------------------------------------------------------------------|-----------|
| R.C(+57.02)MC(+57.02)EALQQIM(+15.99)ENQC(+57.02)D(-18.01)RLQDR.Q | Y    | 30.45  | 2595.0757 | 20     | 2.6 | 866.0348 | 3 | 34.46 | 1        | F1:1551 | OB5918 H6 raw.raw | 3.0045E4        | 1        | 1                   | 92    | 111 | Carbamidomethylation; Oxidation (M) | C1:Carbamidomethylation:1000.00; C3:Carbamidomethylation:1000.00; M10:Oxidation (M):99.62; C14:Carbamidomethylation:1000.00; D15:Dehydration:19.86 | PEAKS PTM |
| total 61 peptides                                                |      |        |           |        |     |          |   |       |          |         |                   |                 |          |                     |       |     |                                     |                                                                                                                                                    |           |

BOYIU5|BOYIU5\_ARAHY

[back to list](#)

| [Protein Coverage](#) | [Supporting Peptides](#) |

Protein Coverage:

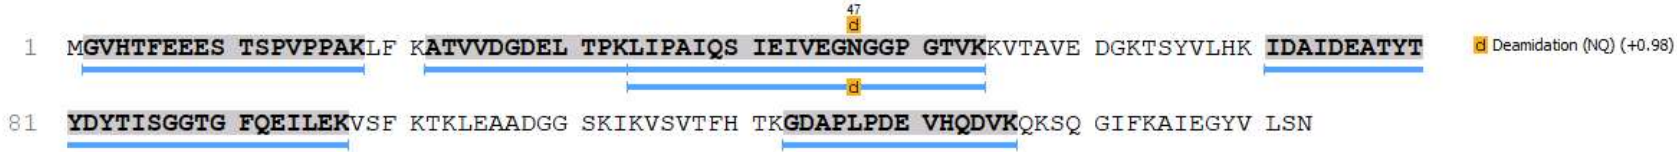

Supporting Peptides:

| Peptide                          | Uniq | -10lgP | Mass      | Length | ppm | m/z       | z | RT    | Fraction | Scan    | Source File       | Area Raw Area 6 | #Feature | #Feature Raw Area 6 | Start | End | PTM              | AScore                      | Found By |
|----------------------------------|------|--------|-----------|--------|-----|-----------|---|-------|----------|---------|-------------------|-----------------|----------|---------------------|-------|-----|------------------|-----------------------------|----------|
| K.IDAIDEATYTYDYTISGGTG FQEILEK.V | Y    | 146.27 | 3012.4126 | 27     | 4.4 | 1507.2202 | 2 | 38.52 | 2        | F2:1926 | OB5930 H6 raw.raw | 7.9824E4        | 2        | 2                   | 71    | 97  |                  |                             | PEAKS DB |
| K.LIPAIQSIEIVEGN(+.98)GGPGTVK.K  | Y    | 143.79 | 2092.1416 | 21     | 4.7 | 1047.0830 | 2 | 35.82 | 1        | F1:1635 | OB5918 H6 raw.raw | 5.1573E4        | 1        | 1                   | 34    | 54  | Deamidation (NQ) | N14:Deamidation (NQ):177.50 | PEAKS DB |
| K.LIPAIQSIEIVEGNGGPGTVK.K        | Y    | 116.87 | 2091.1575 | 21     | 2.0 | 1046.5881 | 2 | 35.72 | 3        | F3:1774 | OB5931 H6 raw.raw | 1.7378E5        | 3        | 3                   | 34    | 54  |                  |                             | PEAKS DB |
| K.GDAPLPDEVH QDVK.Q              | Y    | 88.76  | 1518.7314 | 14     | 0.6 | 760.3735  | 2 | 27.51 | 1        | F1:1143 | OB5918 H6 raw.raw | 3.5932E3        | 3        | 3                   | 123   | 136 |                  |                             | PEAKS DB |
| K.ATVVDGDELTPK.L                 | Y    | 74.60  | 1243.6295 | 12     | 1.0 | 622.8226  | 2 | 28.00 | 3        | F3:1307 | OB5931 H6 raw.raw | 1.0017E4        | 2        | 2                   | 22    | 33  |                  |                             | PEAKS DB |
| M.GVHTFEEESTSPVPPAK.L            | Y    | 70.31  | 1810.8737 | 17     | 0.6 | 906.4446  | 2 | 28.77 | 3        | F3:1359 | OB5931 H6 raw.raw | 6.2111E3        | 3        | 3                   | 2     | 18  |                  |                             | PEAKS DB |
| total 6 peptides                 |      |        |           |        |     |           |   |       |          |         |                   |                 |          |                     |       |     |                  |                             |          |

#CONTAM#P00761

[back to list](#)

| [Protein Coverage](#) | [Supporting Peptides](#) |

Protein Coverage:

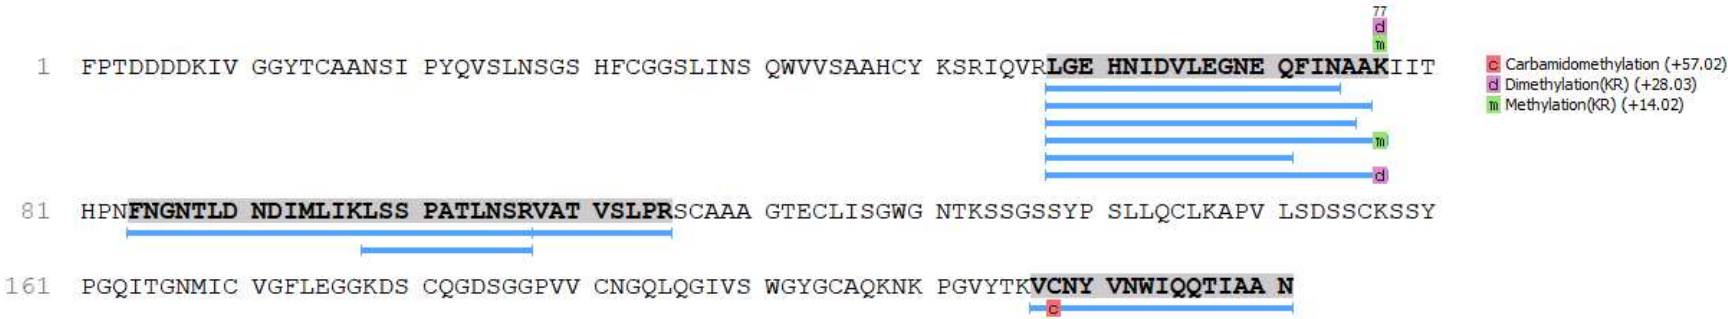

Supporting Peptides:

| Peptide                             | Uniq | -10lgP | Mass      | Length | ppm  | m/z       | z | RT    | Fraction | Scan    | Source File          | Area Raw<br>Ara h 6 | #Feature | #Feature Raw<br>Ara h 6 | Start | End | PTM                  | AScore                          | Found By  |
|-------------------------------------|------|--------|-----------|--------|------|-----------|---|-------|----------|---------|----------------------|---------------------|----------|-------------------------|-------|-----|----------------------|---------------------------------|-----------|
| K.VC(+57.02)NYVNWIIQQTIAAN          | Y    | 120.42 | 1792.8567 | 15     | 5.9  | 897.4409  | 2 | 38.51 | 1        | F1:1793 | OB5918 H6<br>raw,raw | 0                   | 0        | 0                       | 217   | 231 | Carbamidomethylation | C2:Carbamidomethylation:1000.00 | PEAKS DB  |
| R.LGEHNIDVLEGNEQFINAAK(+28.03).I    | Y    | 100.40 | 2238.1279 | 20     | 2.5  | 747.0518  | 3 | 33.89 | 1        | F1:1519 | OB5918 H6<br>raw,raw | 1.029E5             | 3        | 3                       | 58    | 77  | Dimethylation(KR)    | K20:Dimethylation(KR):1000.00   | PEAKS PTM |
| R.LGEHNIDVLEGNEQFIN.A               | Y    | 100.26 | 1939.9275 | 17     | 2.1  | 970.9730  | 2 | 34.08 | 1        | F1:1536 | OB5918 H6<br>raw,raw | 4.5041E5            | 3        | 3                       | 58    | 74  |                      |                                 | PEAKS DB  |
| K.LSSPATLNSR.V                      | Y    | 95.73  | 1044.5564 | 10     | 1.3  | 523.2861  | 2 | 25.64 | 1        | F1:1052 | OB5918 H6<br>raw,raw | 7.8385E4            | 3        | 3                       | 98    | 107 |                      |                                 | PEAKS DB  |
| R.LGEHNIDVLEGNEQFINAAK(+14.02).I    | Y    | 78.26  | 2224.1123 | 20     | 1.3  | 742.3790  | 3 | 34.01 | 2        | F2:1668 | OB5930 H6<br>raw,raw | 7.5546E4            | 2        | 2                       | 58    | 77  | Methylation(KR)      | K20:Methylation(KR):1000.00     | PEAKS PTM |
| R.VATVSLPR.S                        | Y    | 68.83  | 841.5021  | 8      | 2.4  | 421.7593  | 2 | 27.95 | 3        | F3:1328 | OB5931 H6<br>raw,raw | 1.1038E6            | 3        | 3                       | 108   | 115 |                      |                                 | PEAKS DB  |
| R.LGEHNIDVLEGNEQFINAA.K             | Y    | 66.72  | 2082.0017 | 19     | 2.5  | 1042.0107 | 2 | 34.65 | 1        | F1:1570 | OB5918 H6<br>raw,raw | 4.6459E4            | 3        | 3                       | 58    | 76  |                      |                                 | PEAKS DB  |
| R.LGEHNIDVLEGNEQ.F                  | Y    | 60.51  | 1565.7322 | 14     | -8.2 | 783.8669  | 2 | 30.42 | 1        | F1:1342 | OB5918 H6<br>raw,raw | 5.6676E3            | 1        | 1                       | 58    | 71  |                      |                                 | PEAKS DB  |
| R.V(+28.03)ATVSLPR.S                | Y    | 52.23  | 869.5334  | 8      | -0.2 | 435.7739  | 2 | 28.42 | 3        | F3:1321 | OB5931 H6<br>raw,raw | 2.1492E4            | 2        | 2                       | 108   | 115 |                      | V1:Ethylation:38.93             | PEAKS PTM |
| R.LGEHNIDVLEGNEQFINA.A              | Y    | 48.56  | 2010.9646 | 18     | 2.2  | 1006.4918 | 2 | 34.51 | 1        | F1:1560 | OB5918 H6<br>raw,raw | 0                   | 0        | 0                       | 58    | 75  |                      |                                 | PEAKS DB  |
| R.VAT(-18.01)VSLPR.S                | Y    | 48.07  | 823.4916  | 8      | 1.3  | 412.7536  | 2 | 27.95 | 3        | F3:1296 | OB5931 H6<br>raw,raw | 4.973E5             | 2        | 2                       | 108   | 115 |                      | T3:Dehydration:0.00             | PEAKS PTM |
| N.FNGNTLDND(+28.03)IMLIKSSPATLNSR.V | Y    | 32.40  | 2661.3796 | 24     | -0.1 | 888.1337  | 3 | 37.18 | 3        | F3:1841 | OB5931 H6<br>raw,raw | 5.7847E4            | 1        | 1                       | 84    | 107 |                      | D9:Ethylation:15.43             | PEAKS PTM |
| total 12 peptides                   |      |        |           |        |      |           |   |       |          |         |                      |                     |          |                         |       |     |                      |                                 |           |

Q2PK12|Q2PK12\_ARAHY

back to list

| Protein Coverage | Supporting Peptides |

Protein Coverage:

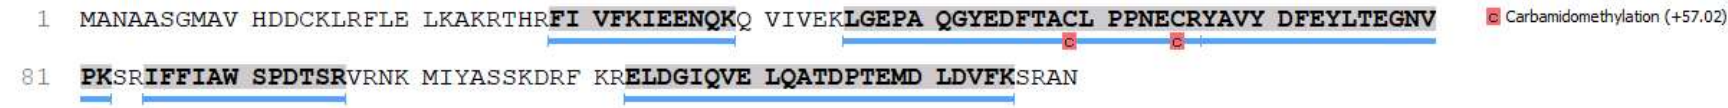

Supporting Peptides:

| Peptide          | Uniq | -10lgP | Mass | Length | ppm | m/z | z | RT | Fraction | Scan | Source File | Area Raw<br>Ara h 6 | #Feature | #Feature Raw<br>Ara h 6 | Start | End | PTM | AScore | Found By |
|------------------|------|--------|------|--------|-----|-----|---|----|----------|------|-------------|---------------------|----------|-------------------------|-------|-----|-----|--------|----------|
| total 5 peptides |      |        |      |        |     |     |   |    |          |      |             |                     |          |                         |       |     |     |        |          |

| Peptide                                   | Uniq | -10lgP | Mass      | Length | ppm  | m/z       | z | RT    | Fraction | Scan    | Source File       | Area Raw Ara h 6 | #Feature | #Feature Raw Ara h 6 | Start | End | PTM                  | AScore                                                            | Found By |
|-------------------------------------------|------|--------|-----------|--------|------|-----------|---|-------|----------|---------|-------------------|------------------|----------|----------------------|-------|-----|----------------------|-------------------------------------------------------------------|----------|
| R.YAVYDFEYLTEGNVPK.S                      | Y    | 136.28 | 1906.8988 | 16     | 3.0  | 954.4595  | 2 | 35.51 | 2        | F2:1754 | OB5930 H6 raw.raw | 4.1839E4         | 3        | 3                    | 67    | 82  |                      |                                                                   | PEAKS DB |
| R.IFFIAWSPDTSR.V                          | Y    | 127.03 | 1438.7245 | 12     | 2.8  | 720.3715  | 2 | 36.96 | 1        | F1:1697 | OB5918 H6 raw.raw | 8.3888E4         | 3        | 3                    | 85    | 96  |                      |                                                                   | PEAKS DB |
| R.FIVFKIEENQK.Q                           | Y    | 80.38  | 1393.7605 | 11     | 2.4  | 697.8892  | 2 | 34.12 | 3        | F3:1671 | OB5931 H6 raw.raw | 3.2374E4         | 3        | 3                    | 29    | 39  |                      |                                                                   | PEAKS DB |
| K.LGEPAQGYEDFTAC(+57.02)LPPNEC(+57.02)R.Y | Y    | 71.22  | 2423.0522 | 21     | -2.6 | 1212.5303 | 2 | 33.24 | 2        | F2:1619 | OB5930 H6 raw.raw | 0                | 0        | 0                    | 46    | 66  | Carbamidomethylation | C14:Carbamidomethylation:1000.00;C20:Carbamidomethylation:1000.00 | PEAKS DB |
| R.ELDGIQVELQATDPTMDLDVFK.S                | Y    | 65.93  | 2605.2468 | 23     | -1.1 | 1303.6293 | 2 | 38.15 | 3        | F3:1905 | OB5931 H6 raw.raw | 0                | 0        | 0                    | 113   | 135 |                      |                                                                   | PEAKS DB |
| total 5 peptides                          |      |        |           |        |      |           |   |       |          |         |                   |                  |          |                      |       |     |                      |                                                                   |          |

#CONTAM#P04264

back to list

| Protein Coverage | Supporting Peptides |

Protein Coverage:

1   MSRQFSSRSG YRSGGGFSSG SAGIINYQRR TTSSSTRRSRG GGGGRFSSCG GGGGSFGAGG GFGSR**SLVNL GGSKSISISV**

81   ARGGGRGSGF GGGYGGGGFG GGGFGGGGFG GGGIGGGGFG GFGSGGGGFG GGGFGGGGYG GGYGPVCPPG GIQEVNTINQS

161   LLQPLNVEID PEIQKVKSR REQIK**SLNNQ FASFIDKVRF LEQQNQVLQT KWELLQQVDT STR**THNLEPY FESFINNLR

241   RVDQLKSDQS RLDSELKNMQ DMVEDYRNKY EDEINKR**TNA ENEFVTIKK**D VDGAYMTKVD LQAKLDNLQQ EIDFLTALYQ

321   AELSQMOTQI SETNVILSMD NNR**SLDLSI IAEVKAQ**NED IAQSKAEAE SLYQSKYEEL QITAGRHGDS VRNSKIEISE

401   LNRVIQRLRS EIDNVKKQIS NLQQSISDAE QRGENALKDA **KNKLNLEDA LQAKEDLAR** LLRDYQELMN TKLALDLEIA

481   TYRTLLEGEE SRMSGECAPN VSVSVSTSHT TISGGGSRGG GGGGYGSGGS SYGSGGGSYG SGGGGGGGRG SYGSGGSSYG

561   SGGGSYGSGG GGGGHGSYGS GSSSGGYRGG SGGGGGGSSG GRGSGGGSSG GSIGGRGSSS GGVKSSGGSS SVRFVSTTYS

641   GVTR

Supporting Peptides:

| Peptide                     | Uniq | -10lgP | Mass      | Length | ppm  | m/z      | z | RT    | Fraction | Scan    | Source File       | Area Raw Ara h 6 | #Feature | #Feature Raw Ara h 6 | Start | End | PTM                      | AScore | Found By |
|-----------------------------|------|--------|-----------|--------|------|----------|---|-------|----------|---------|-------------------|------------------|----------|----------------------|-------|-----|--------------------------|--------|----------|
| R.SLDLSIIAEVK.A             | Y    | 123.83 | 1301.7078 | 12     | 1.1  | 651.8619 | 2 | 36.99 | 2        | F2:1837 | OB5930 H6 raw.raw | 6.7781E4         | 2        | 2                    | 344   | 355 |                          |        | PEAKS DB |
| K.NKLNLEDA LQAKEDLAR.L      | Y    | 73.20  | 2183.1182 | 19     | 0.4  | 728.7136 | 3 | 37.18 | 3        | F3:1846 | OB5931 H6 raw.raw | 3.6534E4         | 1        | 1                    | 442   | 460 |                          |        | PEAKS DB |
| R.FLEQQNQLQTKWELLQQVDTSTR.T | Y    | 71.24  | 2931.5090 | 24     | 2.7  | 978.1796 | 3 | 36.22 | 3        | F3:1790 | OB5931 H6 raw.raw | 5.1596E4         | 1        | 1                    | 200   | 223 |                          |        | PEAKS DB |
| R.SLDLSIIAEVKAQ.N           | Y    | 62.74  | 1500.8035 | 14     | 2.3  | 751.4108 | 2 | 37.75 | 3        | F3:1886 | OB5931 H6 raw.raw | 1.2762E4         | 1        | 1                    | 344   | 357 |                          |        | PEAKS DB |
| K.WELLQQVDTSTR.T            | Y    | 43.36  | 1474.7416 | 12     | 2.5  | 738.3799 | 2 | 33.91 | 3        | F3:1661 | OB5931 H6 raw.raw | 0                | 0        | 0                    | 212   | 223 |                          |        | PEAKS DB |
| R.TNAENEFVTIKK.D            | Y    | 38.64  | 1392.7249 | 12     | 4.5  | 697.3728 | 2 | 27.57 | 2        | F2:1278 | OB5930 H6 raw.raw | 0                | 0        | 0                    | 278   | 289 |                          |        | PEAKS DB |
| K.SLNNQFASFIDKVR.F          | Y    | 36.49  | 1637.8525 | 14     | 1.3  | 819.9346 | 2 | 35.54 | 1        | F1:1619 | OB5918 H6 raw.raw | 0                | 0        | 0                    | 186   | 199 |                          |        | PEAKS DB |
| R.SLVNLGGSKSISIS.V          | Y    | 34.13  | 1360.7561 | 14     | 2.2  | 681.3868 | 2 | 32.06 | 1        | F1:1422 | OB5918 H6 raw.raw | 4.8489E3         | 1        | 1                    | 66    | 79  |                          |        | PEAKS DB |
| K.SLNN(+.98)QFASFIDKVR.F    | Y    | 31.54  | 1638.8365 | 14     | -3.1 | 820.4230 | 2 | 35.40 | 1        | F1:1611 | OB5918 H6 raw.raw | 0                | 0        | 0                    | 186   | 199 | N4:Deamidation (NQ):0.00 |        | PEAKS DB |
| total 9 peptides            |      |        |           |        |      |          |   |       |          |         |                   |                  |          |                      |       |     |                          |        |          |



#CONTAM#P13645

[back to list](#)

| [Protein Coverage](#) | [Supporting Peptides](#) |

Protein Coverage:

1

MSVRYSSSKH YSSSRSGGGG GGGGCGGGG VSSLRISSSK **GSLGGGFSSG GFSGGSFSR**G SSGGGCFGGS SGGYGGLGGF

81

GGGSFRGSYG SSSFGGSYGG SFGGGSFGGG SFGGGSFGGG GFGGGGFGGG FGGGFGDG GLLSGNEKVTM QNLNDRLAS

161

LDKVRALEES NYELEGKIKE WYEKHGNSHQ GEPRDYSKY KTIDDLKNQI LNLTTDNANI LLQIDNARLA ADDFRLKYEN

241

EVALRQSVEA DINGLRR**VLD ELTLTKADLE MQIESLTEEL AYLK**NHEEE MKDLR**NVSTG DVNVEMNAAP GVDLTQLLNN**

271

321

**MR**SQYEQLAE QNRKDAEAWF NEKSKELTTE IDNNIEQISS YKSEITELRR NVQALEIELQ SQLALKQSLE ASLAETEGRY

401

CVQLSQQIAQ ISALEEQQLQ IRAETECQNT EYQQLLDIKI RLENEIQTYR SLLEGE GSSG GGGRGGGSFG GGYGGGSSGG

481

GSSGGGYGGG HGGSSGGGYG GGSSGGGSSG GGYGGGSSSG GHGGGSSSGG HGGSSSGGYG GGSSGGGGGG YGGGSSGGGS

561

SSGGGYGGGS SSGGHKSSSS GSVGESSSKG PRY

Oxidation (M) (+15.99)

Supporting Peptides:

| Peptide                         | Uniq | -10lgP | Mass      | Length | ppm | m/z       | z | RT    | Fraction | Scan    | Source File       | Area Raw Ara h 6 | #Feature | #Feature Raw Ara h 6 | Start | End | PTM           | AScore                    | Found By |
|---------------------------------|------|--------|-----------|--------|-----|-----------|---|-------|----------|---------|-------------------|------------------|----------|----------------------|-------|-----|---------------|---------------------------|----------|
| N.AAPGVDTQLLNNMR.S              | Y    | 101.33 | 1611.8402 | 15     | 0.9 | 806.9281  | 2 | 37.36 | 3        | F3:1861 | OB5931 H6 raw.raw | 1.1703E4         | 1        | 1                    | 308   | 322 |               |                           | PEAKS DB |
| K.GSLGGGFSSGGFSGGSFSR.G         | Y    | 88.34  | 1706.7648 | 19     | 1.3 | 854.3908  | 2 | 32.34 | 3        | F3:1568 | OB5931 H6 raw.raw | 8.1302E3         | 2        | 2                    | 41    | 59  |               |                           | PEAKS DB |
| R.VLDELTLTK.A                   | Y    | 66.95  | 1030.5911 | 9      | 0.3 | 516.3030  | 2 | 30.88 | 1        | F1:1345 | OB5918 H6 raw.raw | 2.1085E3         | 1        | 1                    | 258   | 266 |               |                           | PEAKS DB |
| R.NVSTGDVNVEMNAAPGVDTQLLNNMR.S  | Y    | 64.23  | 2871.3855 | 27     | 5.2 | 1436.7075 | 2 | 38.37 | 2        | F2:1917 | OB5930 H6 raw.raw | 0                | 0        | 0                    | 296   | 322 |               |                           | PEAKS DB |
| K.ADLEM(+15.99)QIESLTEELAYLKK.N | Y    | 42.92  | 2239.1294 | 19     | 0.1 | 747.3838  | 3 | 38.90 | 2        | F2:1948 | OB5930 H6 raw.raw | 0                | 0        | 0                    | 267   | 285 | Oxidation (M) | M5:Oxidation (M):100 0.00 | PEAKS DB |
| total 5 peptides                |      |        |           |        |     |           |   |       |          |         |                   |                  |          |                      |       |     |               |                           |          |

A0A0A6ZDP1|A0A0A6ZDP1\_ARAHY

[back to list](#)

| [Protein Coverage](#) | [Supporting Peptides](#) |

Protein Coverage:

1

MLVHYQIALF HLPRSSTTGL GIVEGLMTTV HSITATQKTV DGPSSKDWRG GR**AASFNIIP SSTGA**AKAVG KVLPSLNGKL

81

TGMAFR**VPTV DVS**VVDLT**VR** LEKPATYDEI K**QAIKEESEG KLKGILGYTE DDV**VSTDFVG **DSR**SSIFDAK AGIALSKNFV

161

K**IV**SWYD**NEW GYSTR**VVDLI VHIAKQ

Supporting Peptides:

| Peptide           | Uniq | -10lgP | Mass      | Length | ppm | m/z      | z | RT    | Fraction | Scan    | Source File       | Area Raw Ara h 6 | #Feature | #Feature Raw Ara h 6 | Start | End | PTM | AScore | Found By |
|-------------------|------|--------|-----------|--------|-----|----------|---|-------|----------|---------|-------------------|------------------|----------|----------------------|-------|-----|-----|--------|----------|
| R.VPTVDVSVDLTVR.L | Y    | 95.12  | 1497.8402 | 14     | 2.0 | 749.9289 | 2 | 34.49 | 1        | F1:1559 | OB5918 H6 raw.raw | 0                | 0        | 0                    | 87    | 100 |     |        | PEAKS DB |
| total 5 peptides  |      |        |           |        |     |          |   |       |          |         |                   |                  |          |                      |       |     |     |        |          |

| Peptide                          | Uniq | -10lgP | Mass      | Length | ppm  | m/z       | z | RT    | Fraction | Scan    | Source File       | Area Raw Ara h 6 | #Feature | #Feature Raw Ara h 6 | Start | End | PTM | AScore                                                                                       | Found By  |
|----------------------------------|------|--------|-----------|--------|------|-----------|---|-------|----------|---------|-------------------|------------------|----------|----------------------|-------|-----|-----|----------------------------------------------------------------------------------------------|-----------|
| K.IVSWYDNEWGYSTR.V               | Y    | 75.46  | 1774.7950 | 14     | 2.5  | 888.4070  | 2 | 34.69 | 2        | F2:1704 | OB5930 H6 raw.raw | 0                | 0        | 0                    | 162   | 175 |     |                                                                                              | PEAKS DB  |
| K.GILGYTEDDVSTDFVGDSR.S          | Y    | 68.51  | 2143.9910 | 20     | 3.8  | 1073.0068 | 2 | 35.45 | 3        | F3:1754 | OB5931 H6 raw.raw | 9.6352E3         | 2        | 2                    | 124   | 143 |     |                                                                                              | PEAKS DB  |
| R.AASFNIIPSSTGAAK.A              | Y    | 65.40  | 1433.7513 | 15     | 1.7  | 717.8842  | 2 | 31.18 | 2        | F2:1493 | OB5930 H6 raw.raw | 1.4402E4         | 3        | 3                    | 53    | 67  |     |                                                                                              | PEAKS DB  |
| K.QAIK(+57.02)EESEGKLG(+57.02).G | Y    | 30.70  | 1472.7834 | 12     | -9.8 | 737.3918  | 2 | 27.47 | 2        | F2:1272 | OB5930 H6 raw.raw | 0                | 0        | 0                    | 112   | 123 |     | K4:Carbamidomethylation (DHKE, X@N-term):8.14;K12:Carbamidomethylation (DHKE, X@N-term):8.64 | PEAKS PTM |
| total 5 peptides                 |      |        |           |        |      |           |   |       |          |         |                   |                  |          |                      |       |     |     |                                                                                              |           |

E9LFE8|E9LFE8\_ARAHY

[back to list](#)

| [Protein Coverage](#) | [Supporting Peptides](#) |

Protein Coverage:

1

KSRKFFLG GK PQEEKGEEGN MFSGLELKT V AESLGIDMGI AGKVQGVDDP RGSIIIVEDE LETLSPAVEE SGNGNGLDET

81

LCTLR LVHQL AESTDADKYN PRAGFLTALN TPNLPVLQYV QLGADRGV FY KNAVMAPHYN LNCHAVIYGT EGRGWIEVVG

161

ENGRKVYEGE VREGQILIVP QQFMVAKKAA EGSDEGFGWI AVKTS DNP MI SPLAGKLSLI RAMP LPVLMN SFR LTAE EAI

241

NLKKRGELTF FSPDPAHTQI

Supporting Peptides:

| Peptide             | Uniq | -10lgP | Mass      | Length | ppm  | m/z      | z | RT    | Fraction | Scan    | Source File       | Area Raw Ara h 6 | #Feature | #Feature Raw Ara h 6 | Start | End | PTM | AScore | Found By |
|---------------------|------|--------|-----------|--------|------|----------|---|-------|----------|---------|-------------------|------------------|----------|----------------------|-------|-----|-----|--------|----------|
| K.AAEGSDEGFGWIAVK.T | Y    | 115.79 | 1535.7256 | 15     | 1.1  | 768.8709 | 2 | 34.20 | 1        | F1:1542 | OB5918 H6 raw.raw | 2.877E3          | 1        | 1                    | 189   | 203 |     |        | PEAKS DB |
| K.TSDNPMISPLAGK.L   | Y    | 93.15  | 1329.6598 | 13     | 0.3  | 665.8374 | 2 | 30.38 | 3        | F3:1447 | OB5931 H6 raw.raw | 3.9471E3         | 2        | 2                    | 204   | 216 |     |        | PEAKS DB |
| R.AMPLPVL MN SFR.L  | Y    | 37.60  | 1374.7152 | 12     | -0.2 | 688.3647 | 2 | 37.09 | 1        | F1:1708 | OB5918 H6 raw.raw | 1.0242E3         | 1        | 1                    | 222   | 233 |     |        | PEAKS DB |
| total 3 peptides    |      |        |           |        |      |          |   |       |          |         |                   |                  |          |                      |       |     |     |        |          |

Q45W80|Q45W80\_ARAHY

[back to list](#)

| [Protein Coverage](#) | [Supporting Peptides](#) |

Protein Coverage:

1

M AEQT FIMIK PDGVQ RGLVG EIISR FEK KG FYLKGLKLIT VDRPFAERHY SDLSAKPFFN GLVEYIISGP VVAMVWEGKG

81

VVATGRK LIG ATNPLASEPG TIRGDF AIDI GRNVIHGSDS VESATKEIAL WFPEGPANWQ SSLHSWIYE

Acetylation (Protein N-term) (+42.01)

Supporting Peptides:

| Peptide                     | Uniq | -10lgP | Mass      | Length | ppm | m/z      | z | RT    | Fraction | Scan    | Source File       | Area Raw Ara h 6 | #Feature | #Feature Raw Ara h 6 | Start | End | PTM                          | AScore                                  | Found By  |
|-----------------------------|------|--------|-----------|--------|-----|----------|---|-------|----------|---------|-------------------|------------------|----------|----------------------|-------|-----|------------------------------|-----------------------------------------|-----------|
| R.GLVGEIISRFEK.K            | Y    | 83.87  | 1346.7557 | 12     | 0.4 | 674.3854 | 2 | 38.32 | 2        | F2:1916 | OB5930 H6 raw.raw | 2.835E4          | 3        | 3                    | 17    | 28  |                              |                                         | PEAKS DB  |
| K.LIGATNPLASEPGTIR.G        | Y    | 81.30  | 1608.8834 | 16     | 1.5 | 805.4502 | 2 | 31.70 | 1        | F1:1395 | OB5918 H6 raw.raw | 1.5218E4         | 2        | 2                    | 88    | 103 |                              |                                         | PEAKS DB  |
| R.GLVGEIISR.F               | Y    | 80.43  | 942.5498  | 9      | 0.6 | 472.2825 | 2 | 31.88 | 1        | F1:1400 | OB5918 H6 raw.raw | 1.5932E4         | 1        | 1                    | 17    | 25  |                              |                                         | PEAKS DB  |
| M.A(+42.01)EQTFIMIKPDGVQR.G | Y    | 70.92  | 1773.9083 | 15     | 0.0 | 887.9614 | 2 | 34.01 | 2        | F2:1657 | OB5930 H6 raw.raw | 4.9394E4         | 3        | 3                    | 2     | 16  | Acetylation (Protein N-term) | A1:Acetylation (Protein N-term):1000.00 | PEAKS PTM |
| total 4 peptides            |      |        |           |        |     |          |   |       |          |         |                   |                  |          |                      |       |     |                              |                                         |           |

Q6PSU3|Q6PSU3\_ARAHY

[back to list](#)

| [Protein Coverage](#) | [Supporting Peptides](#) |

Protein Coverage:

1 MRGRVSPLML LLGILVLASV SATQAKSPYR KTENPCAQRC LQSCQQEPDD LKQKACESRC TKLEYDPRCV YDTGATNQRH  
81 PPGERTRGRQ PGDYDDDDRQ PRREEGGRWG PAEPRERERE EDWRQPREDW RRPSHQQPRK IRPEGREGEQ EWGTPGSEVR  
161 EETSRNNPFY FPSRRFSTRY GNQNGRIRVL QRFQDQSKQF QNLQNHRIQ IEARPNTLVL PKHADADNIL VIQQGQATVT  
241 VANGNNRKSF NLDEGHALRI PSGFISYILN RHDNQNLRVA KISMPVNTPG QFEDFFPASS RDQSSYLQGF SRNTLEAAFN  
321 AEFNEIRRVL LEENAGGEQE ERGQRRRSTR SSDNEGVIVK VSKEHVQELT KHAKSVSKKG SEEDITNPI NLRDGEPDLS  
401 NNFGRLFEVK PDKKNPQLQD LDMMLTCVEI KEGALMLPHF NSKAMVIVVV NKG TG NLELV AVRKEQQQRG RREQEWEEEE  
481 EDEEEEGSNR EVRRYTARLK EGDVFIMPAA HPVAINASSE LHLLGFGINA ENNHRIFLAG DKDNVIDQIE KQAKDLAFPG  
561 SGEQVEKLIK NQRESHFVSA

Supporting Peptides:

| Peptide                  | Uniq | -10lgP | Mass      | Length | ppm | m/z       | z | RT    | Fraction | Scan    | Source File       | Area Raw Ara h 6 | #Feature | #Feature Raw Ara h 6 | Start | End | PTM | AScore | Found By |
|--------------------------|------|--------|-----------|--------|-----|-----------|---|-------|----------|---------|-------------------|------------------|----------|----------------------|-------|-----|-----|--------|----------|
| R.IPSGFISYILNR.H         | Y    | 81.38  | 1378.7609 | 12     | 2.6 | 690.3895  | 2 | 37.54 | 1        | F1:1736 | OB5918 H6 raw.raw | 2.1534E4         | 2        | 2                    | 260   | 271 |     |        | PEAKS DB |
| K.ISMPVNTPGQFEDFFPASSR.D | Y    | 61.71  | 2226.0415 | 20     | 0.0 | 1114.0281 | 2 | 36.55 | 3        | F3:1813 | OB5931 H6 raw.raw | 0                | 0        | 0                    | 282   | 301 |     |        | PEAKS DB |
| total 2 peptides         |      |        |           |        |     |           |   |       |          |         |                   |                  |          |                      |       |     |     |        |          |

sp|P43237|ALL11\_ARAHY

[back to list](#)

| [Protein Coverage](#) | [Supporting Peptides](#) |

Protein Coverage:

1 MRGRVSPLML LLGILVLASV SATQAKSPYR KTENPCAQRC LQSCQQEPDD LKQKACESRC TKLEYDPRCV YDTGATNQRH  
81 PPGERTRGRQ PGDYDDDDRQ PRREEGGRWG PAEPRERERE EDWRQPREDW RRPSHQQPRK IRPEGREGEQ EWGTPGSEVR  
161 EETSRNNPFY FPSRRFSTRY GNQNGRIRVL QRFQDQSKQF QNLQNHRIQ IEARPNTLVL PKHADADNIL VIQQGQATVT  
241 VANGNNRKSF NLDEGHALRI PSGFISYILN RHDNQNLRVA KISMPVNTPG QFEDFFPASS RDQSSYLQGF SRNTLEAAFN  
321 AEFNEIRRVL LEENAGGEQE ERGQRRRSTR SSDNEGVIVK VSKEHVQELT KHAKSVSKKG SEEDITNPI NLRDGEPDLS  
401 NNFGRLFEVK PDKKNPQLQD LDMMLTCVEI KEGALMLPHF NSKAMVIVVV NKG TG NLELV AVRKEQQQRG RREQEWEEEE  
481 EDEEEEGSNR EVRRYTARLK EGDVFIMPAA HPVAINASSE LHLLGFGINA ENNHRIFLAG DKDNVIDQIE KQAKDLAFPG  
561 SGEQVEKLIK NQRESHFVSA RPQSQSPSSP EKEDQEEENQ GKGGPLLSIL KAFN

Supporting Peptides:

| Peptide                  | Uniq | -10lgP | Mass      | Length | ppm | m/z       | z | RT    | Fraction | Scan    | Source File       | Area Raw Ara h 6 | #Feature | #Feature Raw Ara h 6 | Start | End | PTM | AScore | Found By |
|--------------------------|------|--------|-----------|--------|-----|-----------|---|-------|----------|---------|-------------------|------------------|----------|----------------------|-------|-----|-----|--------|----------|
| R.IPSGFISYILNR.H         | Y    | 81.38  | 1378.7609 | 12     | 2.6 | 690.3895  | 2 | 37.54 | 1        | F1:1736 | OB5918 H6 raw.raw | 2.1534E4         | 2        | 2                    | 260   | 271 |     |        | PEAKS DB |
| K.ISMPVNTPGQFEDFFPASSR.D | Y    | 61.71  | 2226.0415 | 20     | 0.0 | 1114.0281 | 2 | 36.55 | 3        | F3:1813 | OB5931 H6 raw.raw | 0                | 0        | 0                    | 282   | 301 |     |        | PEAKS DB |
| total 2 peptides         |      |        |           |        |     |           |   |       |          |         |                   |                  |          |                      |       |     |     |        |          |

B3IXL2|B3IXL2\_ARAHY

[back to list](#)

| [Protein Coverage](#) | [Supporting Peptides](#) |

Protein Coverage:



1 MRGRVSPMLL LLGILVLASV SATQAKSPYR KTENPCAQRC LQSCQQEPDD LKQKACESRC TKLEYDPRCV YDTGATNQRH  
81 PPGERTRGRQ PGDYDDDRRQ PRREEGGRWG PAEPREERERE EDWRQPREDW RRPESHQQPRK IRPEGREGEQ EWGTPGSEVR  
161 EETSRNNPFY FPSRRFSTRY GNQNGRIRVL QRFQDQSKQF QNLQNHRIVQ IEARPNTLVL PKHADADNIL VIQQGQATVT  
241 VANGNNRKSF NLDEGHALRI **PSGFISYILN** RHDNQNLRVA **KISMPVNTPG QFEDFFPASS** RDQSSYLQGF SRNTLEAAFN  
321 AEFNEIRRVL LEENAGGEQE ERGQRRRSTR SSDNEGVIVK VSKEHVQELT KHAKSVSKKG SEEDITNPI NLRDGEPLDLS  
401 NNFGRLFEVK PDKKNPQLQD LDMMLTCVEI KEGALMLPHF NSKAMVIVVV NKGTGNLELV AVRKEQQQQRG RREQEWEEEE  
481 EDEEEGGSNR EVRRYTARLK EGDVFIMPAA HPVAINASSE LHLLGFGINA ENNHRIFLAG DKDNVIDQIE KQAKDLAFPG  
561 SGEQVEKLIK NQRESHFVSA RPQSQSPSSP EKEDQEEENQ GKGKPLLSIL KAFN

Supporting Peptides:

| Peptide                  | Uniq | -10lgP | Mass      | Length | ppm | m/z       | z | RT    | Fraction | Scan    | Source File       | Area Raw Ara h 6 | #Feature | #Feature Raw Ara h 6 | Start | End | PTM | AScore | Found By |
|--------------------------|------|--------|-----------|--------|-----|-----------|---|-------|----------|---------|-------------------|------------------|----------|----------------------|-------|-----|-----|--------|----------|
| R.IPSGFISYILNR.H         | Y    | 81.38  | 1378.7609 | 12     | 2.6 | 690.3895  | 2 | 37.54 | 1        | F1:1736 | OB5918 H6 raw.raw | 2.1534E4         | 2        | 2                    | 260   | 271 |     |        | PEAKS DB |
| K.ISMPVNTPGQFEDFFPASSR.D | Y    | 61.71  | 2226.0415 | 20     | 0.0 | 1114.0281 | 2 | 36.55 | 3        | F3:1813 | OB5931 H6 raw.raw | 0                | 0        | 0                    | 282   | 301 |     |        | PEAKS DB |
| total 2 peptides         |      |        |           |        |     |           |   |       |          |         |                   |                  |          |                      |       |     |     |        |          |

N1NG13|N1NG13\_ARAHY

[back to list](#)

| [Protein Coverage](#) | [Supporting Peptides](#) |

Protein Coverage:

1 MRGRVSPMLL LLGILVLASV SATHAKSSPY QKKTENPCAQ RCLQSCQQEP DDLKQKACES RCTKLEYDPR CVYDPRGHTG  
81 TTNQRSPPG E RTRGRQPGDY DDDRRQPRRE EGGRWGPGAP REREREEDWR QPREDWRRPS HQQPRKIRPE GREGEQEWGT  
161 PGSHVREET S RNPFYFPSR RFSTRYGNQN GRIRVLQRFQ QRSRQFQNLQ NHRIVQIEAK PNTLVLPKHA DADNILVIQQ  
241 GQATVTVANG NNRKSFNLDE GHALR**IPSGF ISYILNR**RHDN QNLRVAK**ISM PVNTPGQFED FFPASSR**DQS SYLQGF SRNT  
321 LEAAFNAEFN EIRRVLLEEN AGGEQEERGQ RRWSTRSSEN NEGVIVKVSK EHVEELTKHA KSVSKKGSEE EGDITNPINL  
401 REGEPDLSNN FGKLFVVKPD KKNPQLQDLD MMLTCVEIKE GALMLPHFNS KAMVIVVVNK GTGNLELVAV RKEQQQQRGRR  
481 EEEEEDEEEE EGSNREVRRY TARLKEGDVF IMPAAHPVAI NASSELHLLG FGINAENNHR IFLAGDKDNV IDQIEKQAKD  
561 LAFPGSGEQV EKLKIQKES HFVSARPQSQ SQSPSSPEKE SPEKEDQEEE NQGGKGPLLS ILKAFN

Supporting Peptides:

| Peptide                  | Uniq | -10lgP | Mass      | Length | ppm | m/z       | z | RT    | Fraction | Scan    | Source File       | Area Raw Ara h 6 | #Feature | #Feature Raw Ara h 6 | Start | End | PTM | AScore | Found By |
|--------------------------|------|--------|-----------|--------|-----|-----------|---|-------|----------|---------|-------------------|------------------|----------|----------------------|-------|-----|-----|--------|----------|
| R.IPSGFISYILNR.H         | Y    | 81.38  | 1378.7609 | 12     | 2.6 | 690.3895  | 2 | 37.54 | 1        | F1:1736 | OB5918 H6 raw.raw | 2.1534E4         | 2        | 2                    | 266   | 277 |     |        | PEAKS DB |
| K.ISMPVNTPGQFEDFFPASSR.D | Y    | 61.71  | 2226.0415 | 20     | 0.0 | 1114.0281 | 2 | 36.55 | 3        | F3:1813 | OB5931 H6 raw.raw | 0                | 0        | 0                    | 288   | 307 |     |        | PEAKS DB |
| total 2 peptides         |      |        |           |        |     |           |   |       |          |         |                   |                  |          |                      |       |     |     |        |          |

sp|P43238|ALL12\_ARAHY

[back to list](#)

| [Protein Coverage](#) | [Supporting Peptides](#) |

Protein Coverage:

1 MRGRVSPLML LLGILVLASV SATHAKSSPY QKKTENPCAQ RCLQSCQQEF DDLKQKACES RCTKLEYDPR CVYDPRGHTG  
81 TTNQRSPPGE RTRGRQPGDY DDDRRQPRRE EGGRWGPAGP REREREEDWR QPREDWRRPS HQQPRKIRPE GREGEQEWT  
161 PGSHVREETTS RNNPFYFSPR RFSTRYGNQN GRIRVLQRFQ QRSRQFQNLQ NHRIVQIEAK PNTLVLPKHA DADNILVIQQ  
241 GQATVTVANG NNRKSFNLDE GHALR**IPSGF ISYILNR**HDN QNLRVAK**ISM FVNTPGQFED FFPASSR**DQS SYLQGFSRNT  
321 LEAAFNAEFN EIRRVLLEN AGGEQEERGQ RRWSTRSEN NEGVIKVKSK EHVEELTKHA KSVSKKGSEE EGDITNPINL  
401 REGEPDLSNN FGKLFVVKPD KKNPQLQDL MMLTCVEIKE GALMLPHFNS KAMVIVVVK GTGNLELVAV RKEQQQRGR  
481 EEEEEDEEEE EGSNREVRRY TARLKEGDFV IMPAAHPVAI NASSELHLG FGINAENNHR IFLAGDKDNV IDQIEKQAKD  
561 LAFPGSGEQV EKLIKQKES HFVSARPSQ SQSPSSPEKE SPEKEDQEEE NQGGKGPLLS ILKAFN

Supporting Peptides:

| Peptide                  | Uniq | -10lgP | Mass      | Length | ppm | m/z       | z | RT    | Fraction | Scan    | Source File       | Area Raw Ara h 6 | #Feature | #Feature Raw Ara h 6 | Start | End | PTM | AScore | Found By |
|--------------------------|------|--------|-----------|--------|-----|-----------|---|-------|----------|---------|-------------------|------------------|----------|----------------------|-------|-----|-----|--------|----------|
| R.IPSGFISYILNR.H         | Y    | 81.38  | 1378.7609 | 12     | 2.6 | 690.3895  | 2 | 37.54 | 1        | F1:1736 | OB5918 H6 raw.raw | 2.1534E4         | 2        | 2                    | 266   | 277 |     |        | PEAKS DB |
| K.ISMPVNTPGQFEDFFPASSR.D | Y    | 61.71  | 2226.0415 | 20     | 0.0 | 1114.0281 | 2 | 36.55 | 3        | F3:1813 | OB5931 H6 raw.raw | 0                | 0        | 0                    | 288   | 307 |     |        | PEAKS DB |
| total 2 peptides         |      |        |           |        |     |           |   |       |          |         |                   |                  |          |                      |       |     |     |        |          |

Q6PSU4|Q6PSU4\_ARAHY

[back to list](#)

| [Protein Coverage](#) | [Supporting Peptides](#) |

Protein Coverage:

1 GFDQSRQFQ NLQNHRIQI EAKPNTLVLP KHADADNIV IQQGQATVTV ANGNRKSFN LDEGHALR**IP SGFISYILNR**  
81 HDNQNLRVAK **ISMPVNTPGQ FEDFFPASSR** DQSSYLQFES RNTLEAAFNA EFNEIRRVLL EENAGGEQEE RGQRRWSTRS  
161 SENNEGVIVK VSKEHVEELT KHAKSVSKKG SEEGDITNPI NLREGEPDLS NNFGKLFVVK PDKKNPQLQD LDMMLTCVEI  
241 KEGALMLPHF NSKAMVIVV NKGTGNLELV AVRKEQQQRG RREEEDEDEE EEESNREVR RTARLKEGD VFIMPAHPV  
321 AINASSELHL LGFGINAENN HRIFLAGDKD NVIDQIEKQA KD LAFPGSGE QVEKLIKQK ESHFVSARQ SQSQSPSSPE  
401 KESPEKEDQE EENQGGKGPL LSILKAFN

Supporting Peptides:

| Peptide                  | Uniq | -10lgP | Mass      | Length | ppm | m/z       | z | RT    | Fraction | Scan    | Source File       | Area Raw Ara h 6 | #Feature | #Feature Raw Ara h 6 | Start | End | PTM | AScore | Found By |
|--------------------------|------|--------|-----------|--------|-----|-----------|---|-------|----------|---------|-------------------|------------------|----------|----------------------|-------|-----|-----|--------|----------|
| R.IPSGFISYILNR.H         | Y    | 81.38  | 1378.7609 | 12     | 2.6 | 690.3895  | 2 | 37.54 | 1        | F1:1736 | OB5918 H6 raw.raw | 2.1534E4         | 2        | 2                    | 69    | 80  |     |        | PEAKS DB |
| K.ISMPVNTPGQFEDFFPASSR.D | Y    | 61.71  | 2226.0415 | 20     | 0.0 | 1114.0281 | 2 | 36.55 | 3        | F3:1813 | OB5931 H6 raw.raw | 0                | 0        | 0                    | 91    | 110 |     |        | PEAKS DB |
| total 2 peptides         |      |        |           |        |     |           |   |       |          |         |                   |                  |          |                      |       |     |     |        |          |

K7PQ65|K7PQ65\_ARAHY

[back to list](#)

| [Protein Coverage](#) | [Supporting Peptides](#) |

Protein Coverage:

1 MCMMGASVDP LVVGRVIGDV IDMFVPSVGM **SVYYGSK**HVT NGCDIKPSMA ISPPKVTLTG GNIHSLYTLV MTDPDAPSPS  
81 EPTMREWLHW VVVDIPGGTN PTQKKEIVAY MGPRPPVGIH **RYILILFEQK** GVLGGVEQPA ARASFNTYF ARQFNLGLPV  
161 ATVYFNSQKE PASKRR

Supporting Peptides:

| Peptide           | Uniq | -10lgP | Mass      | Length | ppm  | m/z      | z | RT    | Fraction | Scan    | Source File       | Area Raw Ara h 6 | #Feature | #Feature Raw Ara h 6 | Start | End | PTM | AScore | Found By |
|-------------------|------|--------|-----------|--------|------|----------|---|-------|----------|---------|-------------------|------------------|----------|----------------------|-------|-----|-----|--------|----------|
| R.YILILFEQK.G     | Y    | 78.59  | 1165.6747 | 9      | -3.3 | 583.8427 | 2 | 36.41 | 2        | F2:1808 | OB5930 H6 raw.raw | 1.6896E4         | 3        | 3                    | 122   | 130 |     |        | PEAKS DB |
| M.FVPSVGMVYYGSK.H | Y    | 48.13  | 1519.7380 | 14     | 1.3  | 760.8773 | 2 | 32.86 | 2        | F2:1596 | OB5930 H6 raw.raw | 0                | 0        | 0                    | 24    | 37  |     |        | PEAKS DB |
| total 2 peptides  |      |        |           |        |      |          |   |       |          |         |                   |                  |          |                      |       |     |     |        |          |

Q1HDS7|Q1HDS7\_ARAHY

[back to list](#)

| [Protein Coverage](#) | [Supporting Peptides](#) |

Protein Coverage:

1

MVKAVAVLSS SEGVSGTIQF SQEGNGPTTV TGNLAGLKPG LHGFHVHALG DTTNGCLSTG PHFNPNNKEH GAPEDENR

HA

81

GDLGNVNVGD DGTVSFSISD SQIPLSGPNS IVGRAVVVHA DPDDLGGH ELSKSTGNAG GRVACGIIGL QG

Supporting Peptides:

| Peptide                                  | Uniq | -10lgP | Mass      | Length | ppm | m/z       | z | RT    | Fraction | Scan    | Source File       | Area Raw Ara h 6 | #Feature | #Feature Raw Ara h 6 | Start | End | PTM | AScore | Found By |
|------------------------------------------|------|--------|-----------|--------|-----|-----------|---|-------|----------|---------|-------------------|------------------|----------|----------------------|-------|-----|-----|--------|----------|
| R.AVVVHADPDDLKG.G                        | Y    | 73.16  | 1334.6830 | 13     | 0.7 | 668.3492  | 2 | 27.55 | 3        | F3:1279 | OB5931 H6 raw.raw | 7.1935E2         | 1        | 1                    | 115   | 127 |     |        | PEAKS DB |
| R.HAGDLGNVNVGDDGTVSFSISDSQIPLSGPNSIVGR.A | Y    | 49.59  | 3580.7393 | 36     | 4.0 | 1791.3840 | 2 | 35.84 | 3        | F3:1773 | OB5931 H6 raw.raw | 5.6262E5         | 2        | 2                    | 79    | 114 |     |        | PEAKS DB |
| total 2 peptides                         |      |        |           |        |     |           |   |       |          |         |                   |                  |          |                      |       |     |     |        |          |

Q45W82|Q45W82\_ARAHY

[back to list](#)

| [Protein Coverage](#) | [Supporting Peptides](#) |

Protein Coverage:

1

MVKAVAVLSS SEGVSGTIQF SQEGNGPTTV TGNLAGLKPG LHGFHVHALG DTTNGCLSTG PHFNPNNKEH GAPEDENR

HA

81

GDLGNVNVGD DGTVSFSISD SQIPLSGPNS IVGRAVVVHA DPDDLGGH ELSKSTGNAG GGVACGIIGL QG

Supporting Peptides:

| Peptide                                  | Uniq | -10lgP | Mass      | Length | ppm | m/z       | z | RT    | Fraction | Scan    | Source File       | Area Raw Ara h 6 | #Feature | #Feature Raw Ara h 6 | Start | End | PTM | AScore | Found By |
|------------------------------------------|------|--------|-----------|--------|-----|-----------|---|-------|----------|---------|-------------------|------------------|----------|----------------------|-------|-----|-----|--------|----------|
| R.AVVVHADPDDLKG.G                        | Y    | 73.16  | 1334.6830 | 13     | 0.7 | 668.3492  | 2 | 27.55 | 3        | F3:1279 | OB5931 H6 raw.raw | 7.1935E2         | 1        | 1                    | 115   | 127 |     |        | PEAKS DB |
| R.HAGDLGNVNVGDDGTVSFSISDSQIPLSGPNSIVGR.A | Y    | 49.59  | 3580.7393 | 36     | 4.0 | 1791.3840 | 2 | 35.84 | 3        | F3:1773 | OB5931 H6 raw.raw | 5.6262E5         | 2        | 2                    | 79    | 114 |     |        | PEAKS DB |
| total 2 peptides                         |      |        |           |        |     |           |   |       |          |         |                   |                  |          |                      |       |     |     |        |          |

#CONTAM#P35527

[back to list](#)

| [Protein Coverage](#) | [Supporting Peptides](#) |

Protein Coverage:

1 MSCRQFSSSY LSRSGGGGGG GLGSGGSIRS SYSRFSSSSG RGGGGRFSSS SGYGGGSSRV CGRGGGGSFG YSYGGGSGGG  
81 FSASSLGGGF GGGSRGFGGA SGGGYSSSSG FGGGFGGGSG GGFGGGYGSG FGGLGGFGGG AGGGDGGILT ANEKSTMQEL  
161 NSRL**LASYLDK VQAL**EEANND LENKIQDWYD KKGPAAIQ**KN YSPYYNTIDD LKDQIVDLTV GNNK**TLLDID NTRMTLDDFR  
241 IKFEMEQNLR QGVDDADINGL RQVLDNLTME KSDLEMQYET LQEELMALKK NHKEEMSQLT GQNSGDVNVE INVAPGKDLT  
321 KTLNDMRQEY EQLIAKNRKD IENQYETQIT QIEHEVSSSG QEVQSSAKEV TQLRHGVQEL EIELQSQLSK KAALEKSLED  
401 TKNRYCGQLQ MIQEQISNLE AQITDVRQEI ECQNQEYSL LSIKMRLEKE IETYHNLLEG GQEDFESSGA GKIGLGGRGG  
481 SGGSYGRGSR GSGSGSYGGG GSGGGYGGGS GSRGSGSGSY GGGSGSGGGS GGGYGGGSGG GHSGGSGGGH SGGSGGNYGG  
561 GSGSGGGSGG GYGGGSGSRG GSGGSHGGGS GFGGESGGSY GGGEEASGSG GGYGGGSGKS SHS

Supporting Peptides:

| Peptide                             | Uniq | -10lgP | Mass      | Length | ppm | m/z      | z | RT    | Fraction | Scan    | Source File          | Area Raw Ara h<br>6 | #Feature | #Feature Raw Ara h<br>6 | Start | End | PTM | AScore                        | Found By    |
|-------------------------------------|------|--------|-----------|--------|-----|----------|---|-------|----------|---------|----------------------|---------------------|----------|-------------------------|-------|-----|-----|-------------------------------|-------------|
| K,NYSPYYNTIDDLKDQIVDLTVGNNK,T       | Y    | 58.26  | 2901.4031 | 25     | 3.4 | 968.1449 | 3 | 38.27 | 3        | F3:1912 | OB5931 H6<br>raw.raw | 0                   | 0        | 0                       | 200   | 224 |     |                               | PEAKS<br>DB |
| R,LASYLDKVQAL,E                     | Y    | 40.23  | 1219.6812 | 11     | 0.3 | 610.8480 | 2 | 33.05 | 1        | F1:1473 | OB5918 H6<br>raw.raw | 4.9064E3            | 1        | 1                       | 164   | 174 |     |                               | PEAKS<br>DB |
| K,N(+.98)YSPYYNTIDDLKDQIVDLTVGNNK,T | Y    | 38.28  | 2902.3872 | 25     | 8.1 | 968.4775 | 3 | 38.32 | 3        | F3:1912 | OB5931 H6<br>raw.raw | 1.0944E4            | 1        | 1                       | 200   | 224 |     | N1:Deamidation (NQ):21.<br>46 | PEAKS<br>DB |
| total 3 peptides                    |      |        |           |        |     |          |   |       |          |         |                      |                     |          |                         |       |     |     |                               |             |

Peptide List

Prepared with PEAKS™ (bioinform.com)



Summary

1. Notes Ara h 6 GEL BAND ROASTED

Project Ara h 6 gel PTM peanut; Sample: ROAST Ara h 6, PTM33 (node name).  
However comparing the to RAW sample where Ara h 6 allergen was on the first place in abundancy, here in ROAST sample, t here is maple of Ara h1 and Ara h 3 occupying the first 4 places.

2. Result Statistics

Figure 1. False discovery rate (FDR) curve. X axis is the number of peptides being kept. Y axis is the corresponding FDR.

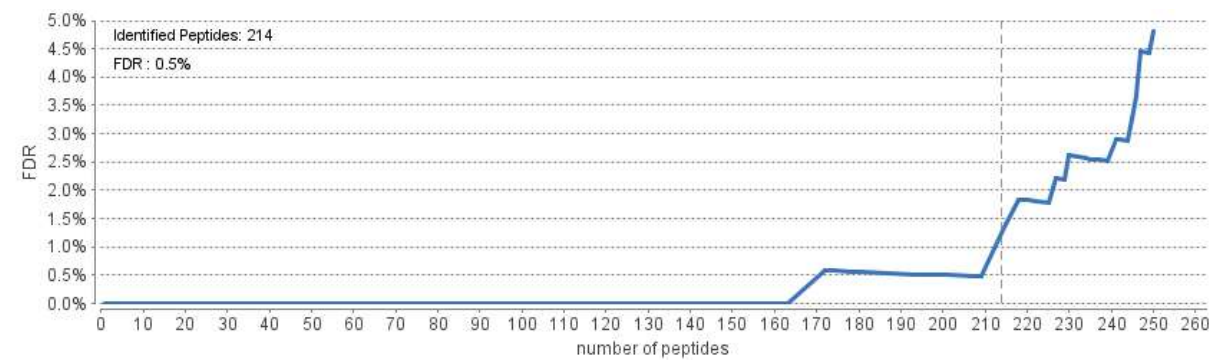

Figure 2. PSM score distribution. (a) Distribution of PEAKS peptide score; (b) Scatterplot of PEAKS peptide score versus precursor mass error.

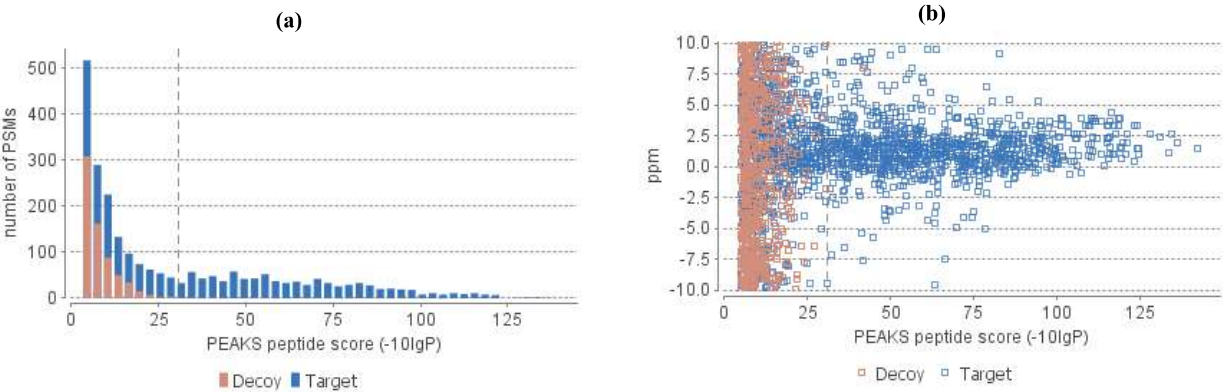

Table 1. Statistics of data.

|  | #Scans | #Features | Identified | #Peptides | #Sequences |
|--|--------|-----------|------------|-----------|------------|
|--|--------|-----------|------------|-----------|------------|



|               | MS1  | MS/MS | #Chimera |      | #PSMs | #Scans | #Features** |     | #Proteins* |    |    |    |
|---------------|------|-------|----------|------|-------|--------|-------------|-----|------------|----|----|----|
| Total         | 7393 | 4181  | 330      | 3951 | 908   | 899    | 380         | 214 | 120        | 13 | 24 | 18 |
| Roast Ara h 6 | 7393 | 4181  | 330      | 3951 | 908   | 899    | 380         | 214 | 120        | 13 | 24 | 18 |

\* proteins with significant peptides are used in counts.  
\*\* features are identified by DB search only.

Figure 3. Sample overlap for Proteins and Peptides (up to 8 samples). (a) All Proteins; (b) Top Proteins; (c) Peptides; ?

(a)  
Not applicable to only one sample

(b)  
Not applicable to only one sample

(c)  
Not applicable to only one sample

Figure 4. Distribution of peptide feature detection. (a) Feature m/z distribution; (b) Feature RT distribution.

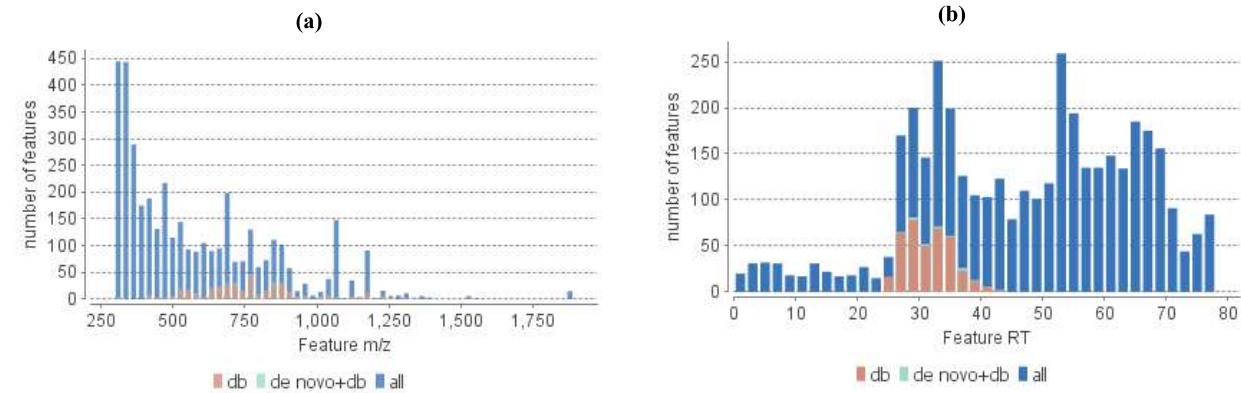

Figure 5. Distribution of identified peptide features. (a) Feature abundance distribution; (b) *De novo* sequencing validation. ?

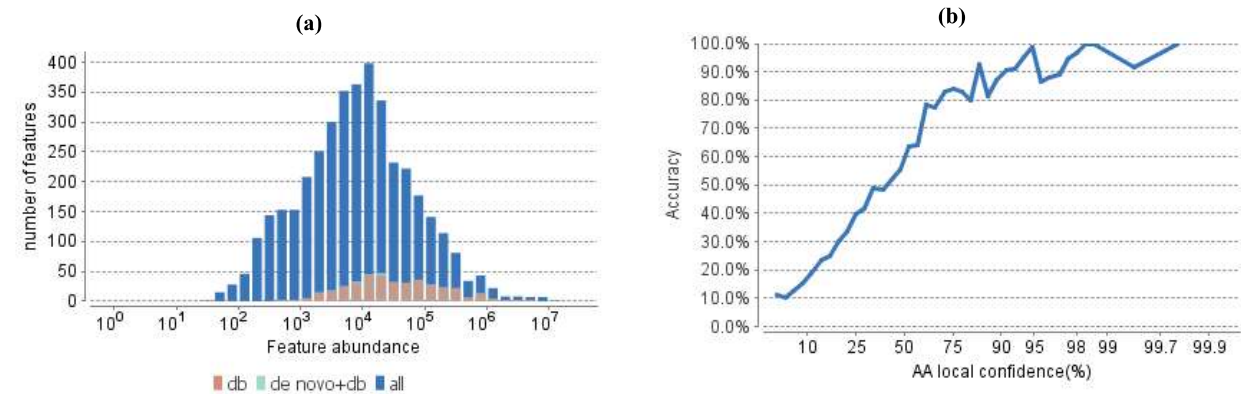

Table 2. Result filtration parameters.

Table 4. PTM profile.

|                          |       |
|--------------------------|-------|
| Peptide -10lgP           | ≥30.8 |
| PTM Ascore               | ≥50   |
| Protein -10lgP           | ≥20   |
| Proteins unique peptides | ≥2    |
| De novo score(%)         | ≥50%  |

|                                                |      |
|------------------------------------------------|------|
| <b>Table 3.</b> Statistics of filtered result. |      |
| FDR (Peptide-Spectrum Matches)                 | 0.1% |
| FDR (Peptide Sequences)                        | 0.5% |
| FDR (Protein Group)                            | 0.0% |
| De Novo Only Spectra                           | 21   |

| proteins            |        |           |      |        |           |         |  |
|---------------------|--------|-----------|------|--------|-----------|---------|--|
| Name                | ΔMass  | Position  | #PSM | -10lgP | Abundance | AScore  |  |
| Carbamidomethyl     | 57.02  | C         | 319  | 142.29 | 3.56E5    | 1000.00 |  |
| Oxidation           | 15.99  | M         | 70   | 118.58 | 1.17E6    | 1000.00 |  |
| Deamidation         | .98    | NQ        | 52   | 123.27 |           | 77.51   |  |
| Propionamide        | 71.04  | C         | 42   | 92.77  | 3.19E4    | 1000.00 |  |
| Carbamidomethyl     | 57.02  | DE,N-term | 19   | 121.19 | 6.33E4    | 49.43   |  |
| Pyro-glu from Q     | -17.03 | N-term    | 18   | 91.37  | 3.05E5    | 1000.00 |  |
| Ethyl               | 28.03  | DE,N-term | 11   | 82.43  | 1.69E4    | 18.53   |  |
| Ammonia loss        | -17.03 | N-term    | 8    | 88.83  | 1.5E4     | 1000.00 |  |
| Dehydration         | -18.01 | DSTY      | 6    | 47.12  |           | 39.55   |  |
| Cation:Fe[II]       | 53.92  | E         | 5    | 48.83  |           | 14.63   |  |
| Methylation(KR)     | 14.02  | KR        | 4    | 42.80  | 2.44E4    | 1000.00 |  |
| Dimethylation(KR)   | 28.03  | K         | 3    | 63.33  | 2.88E4    | 1000.00 |  |
| Ammonia loss        | -17.03 | N         | 3    | 58.39  |           | 67.21   |  |
| Carboxymethyl       | 58.01  | C         | 2    | 39.19  |           | 0.00    |  |
| Sodium              | 21.98  | DE        | 2    | 39.39  | 7.53E3    | 69.29   |  |
| Pyro-glu from E     | -18.01 | N-term    | 2    | 38.68  |           | 1000.00 |  |
| Dethiomethyl        | -48.00 | M         | 2    | 71.71  | 1.56E5    | 1000.00 |  |
| Oxidation           | 15.99  | P         | 1    | 41.41  | 4E4       | 0.00    |  |
| Methylation(others) | 14.02  | H         | 1    | 36.41  | 1.57E4    | 4.52    |  |
| Iodination          | 125.90 | Y         | 1    | 43.24  | 6.88E3    | 41.59   |  |
| Ammonium            | 17.03  | E         | 1    | 48.35  |           | 18.53   |  |
| Oxidation           | 15.99  | W         | 1    | 37.59  | 3.89E3    | 1000.00 |  |
| Carbamylation       | 43.01  | N-term    | 1    | 37.45  |           | 1000.00 |  |
| Amidine             | 41.03  | K         | 1    | 59.14  | 4.17E3    | 38.16   |  |
| Dihydroxy           | 31.99  | F         | 1    | 63.29  |           | 0.00    |  |
| Diethylation        | 56.06  | K         | 1    | 41.08  |           | 88.07   |  |

3. Experiment Control

Figure 6. Precursor mass error of peptide-spectrum matches (PSM) in filtered result. (a) Distribution of precursor mass error in ppm; (b) Scatterplot of precursor m/z versus precursor mass error in ppm.

(a)

(b)

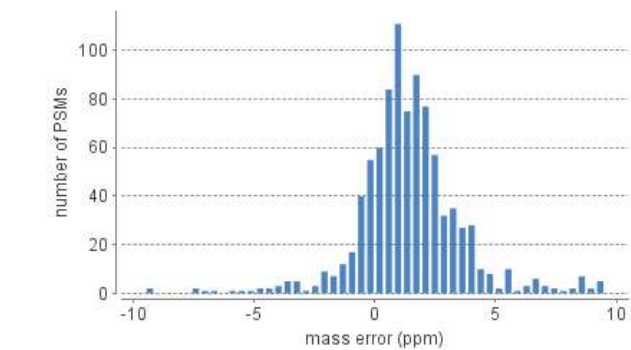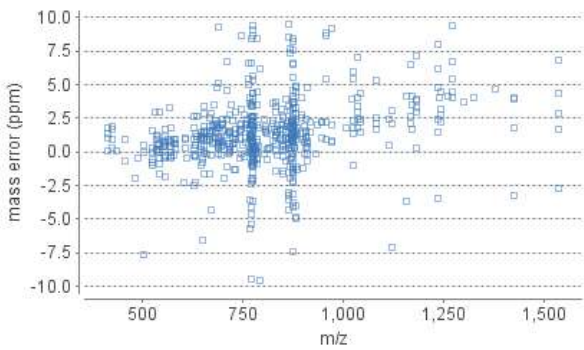

**Table 5.** Number of identified peptides in each sample by the number of missed cleavages.

|                  |     |    |   |   |    |
|------------------|-----|----|---|---|----|
| Missed Cleavages | 0   | 1  | 2 | 3 | 4+ |
| Roast Ara h 6    | 148 | 61 | 5 | 0 | 0  |

4. Other Information

**Table 6.** Search parameters.

PEAKS Version: PEAKS Studio 10.6 build 20201015  
Search Engine Name: PEAKS  
Parent Mass Error Tolerance: 10.0 ppm  
Fragment Mass Error Tolerance: 0.5 Da  
Precursor Mass Search Type: monoisotopic  
Enzyme: Trypsin  
Max Missed Cleavages: 2  
Digest Mode: Semispecific  
Fixed Modifications:  
  Carbamidomethylation: 57.02  
Variable Modifications:  
  Oxidation (M): 15.99  
  Deamidation (NQ): 0.98  
  Acetylation (K): 42.01  
  Acetylation (Protein N-term): 42.01  
  Acetylation (N-term): 42.01  
  Amidation: -0.98  
  Beta-methylthiolation: 45.99  
  Biotinylation: 226.08  
  and 303 more...  
Max Variable PTM Per Peptide: 5  
Database: Uniprot\_Peanut-3818\_Jul18  
Taxon: All  
Contaminant Database: contam MQ  
Searched Entry: 1723  
FDR Estimation: Enabled  
De novo score(%) threshold: 15  
Peptide hit threshold (-10logP): 30.0

**Table 7.** Instrument parameters.

Fractions: OB5942 H6 Ro.raw, OB5943 H6 Ro.raw, OB5944 H6 Ro.raw  
  
Ion Source: ESI(nano-spray)  
Fragmentation Mode: CID, CAD(y and b ions)  
MS Scan Mode: FT-ICR/Orbitrap  
MS/MS Scan Mode: FT-ICR/Orbitrap

Peaks run ID: 32  
Merge Options: no merge  
Precursor Options: corrected  
Charge Options: no correction  
Filter m/z: 200.0 - 2000.0  
Filter Charge: 2 - 12  
Process: true  
Associate chimera: yes

Protein List

Protein Accession Contains:  
Protein Description Contains:  
Protein Sample Area >=  
Protein PTM Contains:

| Protein Group | Protein ID | Accession                             | -10lgP | Coverage (%) | Coverage (%) Roast Ara h 6 | Area Roast Ara h 6 | #Peptides | #Unique | #Spec Roast Ara h 6 | PTM | Avg. Mass | Description                                                                              |
|---------------|------------|---------------------------------------|--------|--------------|----------------------------|--------------------|-----------|---------|---------------------|-----|-----------|------------------------------------------------------------------------------------------|
| 3             | 7          | <a href="#">A1DZF0 A1DZF0_ARAHY</a>   | 432.38 | 51           | 51                         | 3.5979E5           | 23        | 2       | 230                 | Y   | 60375     | Arachin 6 OS=Arachis hypogaea OX=3818 PE=2 SV=1                                          |
| 2             | 4          | <a href="#">Q9FZ11 Q9FZ11_ARAHY</a>   | 425.38 | 45           | 45                         | 4.0221E5           | 22        | 2       | 232                 | Y   | 60449     | Gly1 OS=Arachis hypogaea OX=3818 GN=Gly1 PE=2 SV=1                                       |
| 4             | 3          | <a href="#">Q647H3 Q647H3_ARAHY</a>   | 421.61 | 50           | 50                         | 9.5117E5           | 22        | 2       | 230                 | Y   | 61532     | Arachin Ahy-2 OS=Arachis hypogaea OX=3818 PE=2 SV=1                                      |
| 7             | 8          | <a href="#">Q647H4 Q647H4_ARAHY</a>   | 414.26 | 44           | 44                         | 2.2999E5           | 20        | 3       | 199                 | Y   | 61506     | Arachin Ahy-1 OS=Arachis hypogaea OX=3818 PE=2 SV=1                                      |
| 1             | 1          | <a href="#">A5Z1R0 A5Z1R0_ARAHY</a>   | 343.58 | 70           | 70                         | 3.5903E7           | 15        | 15      | 352                 | Y   | 16920     | Ara h 6 allergen OS=Arachis hypogaea OX=3818 GN=Ara h 6 PE=4 SV=1                        |
| 1             | 2          | <a href="#">sp Q647G9 CONG_ARAHY</a>  | 343.58 | 70           | 70                         | 3.5903E7           | 15        | 15      | 352                 | Y   | 16920     | Conglutin OS=Arachis hypogaea OX=3818 PE=1 SV=1                                          |
| 9             | 31         | <a href="#">N1NG13 N1NG13_ARAHY</a>   | 326.60 | 34           | 34                         | 6.3611E4           | 17        | 2       | 65                  | Y   | 71345     | Seed storage protein Ara h1 OS=Arachis hypogaea OX=3818 GN=ARAX_AHF4 17E07-017 PE=4 SV=1 |
| 9             | 30         | <a href="#">sp P43238 ALL12_ARAHY</a> | 326.60 | 34           | 34                         | 6.3611E4           | 17        | 2       | 65                  | Y   | 71345     | Allergen Ara h 1, clone P41B OS=Arachis hypogaea OX=3818 PE=1 SV=1                       |
| 10            | 29         | <a href="#">sp P43237 ALL11_ARAHY</a> | 324.92 | 33           | 33                         | 4.3126E4           | 17        | 2       | 63                  | Y   | 70283     | Allergen Ara h 1, clone P17 OS=Arachis hypogaea OX=3818 PE=1 SV=1                        |
| 10            | 28         | <a href="#">B3IXL2 B3IXL2_ARAHY</a>   | 324.92 | 33           | 33                         | 4.3126E4           | 17        | 2       | 63                  | Y   | 70283     | Main allergen Ara h1 OS=Arachis hypogaea OX=3818 PE=2 SV=1                               |
| 10            | 27         | <a href="#">Q6PSU3 Q6PSU3_ARAHY</a>   | 324.92 | 35           | 35                         | 4.3126E4           | 17        | 2       | 63                  | Y   | 66575     | Conarachin (Fragment) OS=Arachis hypogaea OX=3818 PE=4 SV=1                              |
| 12            | 305        | <a href="#">Q647H1 Q647H1_ARAHY</a>   | 280.08 | 15           | 15                         | 3.6852E5           | 7         | 7       | 28                  | Y   | 75933     | Conarachin OS=Arachis hypogaea OX=3818 PE=2 SV=1                                         |
| 15            | 976        | <a href="#">sp Q647H2 AHY3_ARAHY</a>  | 254.10 | 28           | 28                         | 1.0066E5           | 8         | 6       | 23                  | Y   | 54569     | Arachin Ahy-3 OS=Arachis hypogaea OX=3818 PE=1 SV=1                                      |
| 14            | 60         | <a href="#">Q6IWG5 Q6IWG5_ARAHY</a>   | 241.18 | 30           | 30                         | 1.6341E6           | 8         | 7       | 23                  | Y   | 58061     | Glycinin (Fragment) OS=Arachis hypogaea OX=3818 PE=2 SV=1                                |
| 14            | 61         | <a href="#">Q0GM57 Q0GM57_ARAHY</a>   | 241.18 | 30           | 30                         | 1.6341E6           | 8         | 7       | 23                  | Y   | 58263     | Iso-Ara h3 OS=Arachis hypogaea OX=3818 PE=2 SV=1                                         |
| 11            | 14         | <a href="#">#CONTAM#P00761</a>        | 196.82 | 23           | 23                         | 2.0321E6           | 7         | 7       | 41                  | Y   | 24409     | SWISS-PROT: #CONTAM#P00761 TRYP_PIG Trypsin - Sus scrofa (Pig).                          |
| 16            | 25         | <a href="#">E9LFE8 E9LFE8_ARAHY</a>   | 189.73 | 35           | 35                         | 6.6355E4           | 6         | 6       | 9                   | N   | 28290     | 11S arachin (Fragment) OS=Arachis hypogaea OX=3818 PE=2 SV=1                             |
| 13            | 262        | <a href="#">sp Q6PSU2 CONG7_ARAHY</a> | 180.98 | 40           | 40                         | 2.3053E5           | 5         | 5       | 25                  | Y   | 20114     | Conglutin-7 OS=Arachis hypogaea OX=3818 PE=1 SV=2                                        |

total 18 proteins

A1DZF0|A1DZF0\_ARAHY

[back to list](#)

| [Protein Coverage](#) | [Supporting Peptides](#) |

Protein Coverage:

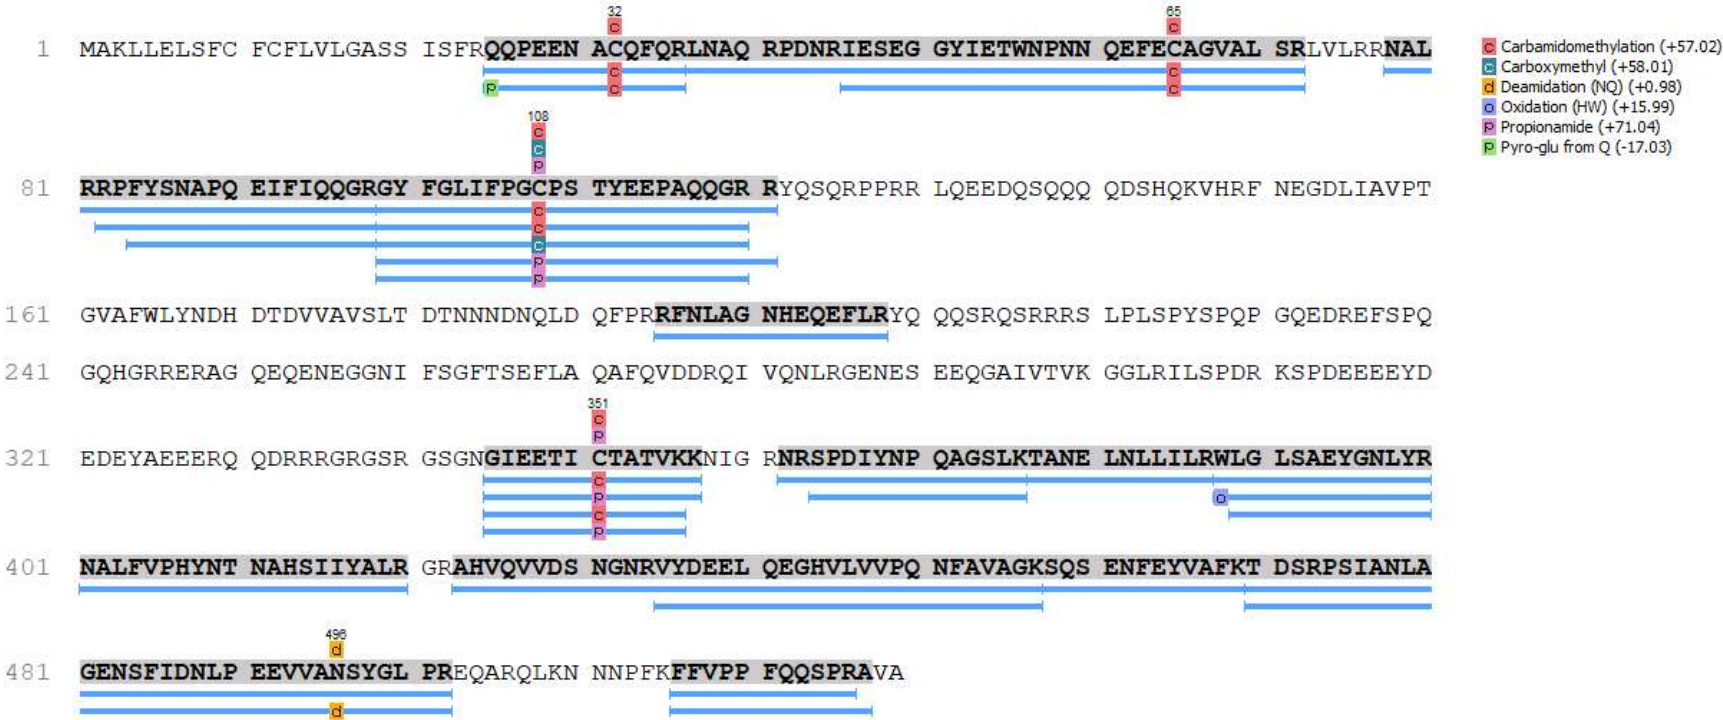

Supporting Peptides:

| Peptide                                | Uniq | -10lgP | Mass      | Length | ppm | m/z       | z | RT    | Fraction | Scan    | Source File      | Area Roast Ara h 6 | #Feature | #Feature Roast Ara h 6 | Start | End | PTM                  | AScore                             | Found By |
|----------------------------------------|------|--------|-----------|--------|-----|-----------|---|-------|----------|---------|------------------|--------------------|----------|------------------------|-------|-----|----------------------|------------------------------------|----------|
| R.GYFGLIFPGC(+57.02)PSTYEPAQQGR.R      | N    | 142.29 | 2473.1372 | 22     | 1.5 | 1237.5778 | 2 | 36.17 | 4        | F4:1794 | OB5942 H6 Ro.raw | 1.0118E6           | 3        | 3                      | 99    | 120 | Carbamidomethylation | C10:Carbamido methylation:10 00.00 | PEAKS DB |
| R.WGLSAEYGNLYR.N                       | N    | 136.28 | 1540.7673 | 13     | 2.0 | 771.3925  | 2 | 34.64 | 4        | F4:1712 | OB5942 H6 Ro.raw | 2.2268E6           | 6        | 6                      | 388   | 400 |                      |                                    | PEAKS DB |
| K.SQSENFYVAFK.T                        | N    | 124.82 | 1447.6619 | 12     | 1.0 | 724.8389  | 2 | 31.74 | 5        | F5:1533 | OB5943 H6 Ro.raw | 9.8941E5           | 3        | 3                      | 458   | 469 |                      |                                    | PEAKS DB |
| R.RPFYSNAPQEIFIQQGR.G                  | N    | 119.86 | 2050.0383 | 17     | 2.0 | 684.3547  | 3 | 32.67 | 5        | F5:1597 | OB5943 H6 Ro.raw | 3.2279E6           | 6        | 6                      | 82    | 98  |                      |                                    | PEAKS DB |
| K.FFVPPFQQSPR.A                        | Y    | 119.19 | 1348.6927 | 11     | 1.6 | 675.3547  | 2 | 33.24 | 5        | F5:1632 | OB5943 H6 Ro.raw | 3.0083E5           | 3        | 3                      | 516   | 526 |                      |                                    | PEAKS DB |
| R.NRSPDIYNPQAGSLK.T                    | N    | 114.42 | 1658.8376 | 15     | 0.1 | 830.4261  | 2 | 27.65 | 5        | F5:1291 | OB5943 H6 Ro.raw | 4.04E5             | 6        | 6                      | 362   | 376 |                      |                                    | PEAKS DB |
| R.SPDIYNPQAGSLK.T                      | N    | 102.05 | 1388.6936 | 13     | 0.9 | 695.3547  | 2 | 28.77 | 5        | F5:1355 | OB5943 H6 Ro.raw | 7.3513E5           | 3        | 3                      | 364   | 376 |                      |                                    | PEAKS DB |
| K.TDSRPSIANLAGENSFIDNLP EEVVANSYGLPR.E | N    | 101.93 | 3544.7434 | 33     | 3.9 | 1182.5930 | 3 | 37.73 | 6        | F6:1866 | OB5944 H6 Ro.raw | 1.0339E6           | 4        | 4                      | 470   | 502 |                      |                                    | PEAKS DB |

total 45 peptides

| Peptide                                          | Uniq | -10lgP | Mass      | Length | ppm  | m/z       | z | RT    | Fraction | Scan    | Source File      | Area Roast Ara h 6 | #Feature | #Feature Roast Ara h 6 | Start | End | PTM                                   | AScore                                                     | Found By  |
|--------------------------------------------------|------|--------|-----------|--------|------|-----------|---|-------|----------|---------|------------------|--------------------|----------|------------------------|-------|-----|---------------------------------------|------------------------------------------------------------|-----------|
| R,NALFVPHYNTNAHSIIYALR,G                         | N    | 97.15  | 2313.2019 | 20     | -0.1 | 772.0745  | 3 | 35.38 | 6        | F6:1747 | OB5944 H6 Ro.raw | 2.7972E6           | 8        | 8                      | 401   | 420 |                                       |                                                            | PEAKS DB  |
| R.GYFGLIFPGC(+71.04)PSTYEPAQQGR,R                | N    | 92.77  | 2487.1528 | 22     | 2.2  | 1244.5864 | 2 | 36.43 | 5        | F5:1817 | OB5943 H6 Ro.raw | 8.0086E4           | 3        | 3                      | 99    | 120 | Propionamide                          | C10:Propionamide:1000.00                                   | PEAKS PTM |
| N.GIEETIC(+57.02)TATVKK,N                        | N    | 91.54  | 1448.7545 | 13     | 0.7  | 725.3850  | 2 | 27.45 | 4        | F4:1292 | OB5942 H6 Ro.raw | 1.4529E5           | 2        | 2                      | 345   | 357 | Carbamidomethylation                  | C7:Carbamidomethylation:100.00                             | PEAKS DB  |
| R.VYDEELQEGHVLVVPQNFAVAGK,S                      | N    | 89.66  | 2540.2910 | 23     | 2.7  | 847.7732  | 3 | 32.92 | 4        | F4:1613 | OB5942 H6 Ro.raw | 4.6093E5           | 4        | 4                      | 435   | 457 |                                       |                                                            | PEAKS DB  |
| R.Q(-17.03)QPEENAC(+57.02)QFQR,L                 | N    | 88.35  | 1516.6365 | 12     | 2.5  | 759.3274  | 2 | 28.03 | 5        | F5:1319 | OB5943 H6 Ro.raw | 7.279E3            | 2        | 2                      | 25    | 36  | Pyro-glu from Q; Carbamidomethylation | Q1:Pyro-glu from Q:1000.00;C8:Carbamidomethylation:1000.00 | PEAKS PTM |
| R.IESEGGYIETWNPNNQEFEC(+57.02)AGVALSR,L          | N    | 85.95  | 3069.3774 | 27     | 5.5  | 1024.1387 | 3 | 34.81 | 5        | F5:1720 | OB5943 H6 Ro.raw | 1.0361E4           | 1        | 1                      | 46    | 72  | Carbamidomethylation                  | C20:Carbamidomethylation:1000.00                           | PEAKS DB  |
| R.QQPEENAC(+57.02)QFQR,L                         | N    | 84.17  | 1533.6630 | 12     | 1.7  | 767.8400  | 2 | 25.24 | 5        | F5:1157 | OB5943 H6 Ro.raw | 3.7544E4           | 3        | 3                      | 25    | 36  | Carbamidomethylation                  | C8:Carbamidomethylation:100.00                             | PEAKS DB  |
| K.TANELNLLILR,W                                  | N    | 81.05  | 1268.7452 | 11     | 0.9  | 635.3805  | 2 | 34.83 | 4        | F4:1715 | OB5942 H6 Ro.raw | 7.0668E5           | 3        | 3                      | 377   | 387 |                                       |                                                            | PEAKS DB  |
| N.GIEETIC(+57.02)TATVK,K                         | N    | 81.04  | 1320.6595 | 12     | -0.1 | 661.3370  | 2 | 29.52 | 5        | F5:1405 | OB5943 H6 Ro.raw | 2.3112E4           | 2        | 2                      | 345   | 356 | Carbamidomethylation                  | C7:Carbamidomethylation:100.00                             | PEAKS DB  |
| P.FYSNAPQEIFIQQGR,G                              | N    | 76.66  | 1796.8845 | 15     | -1.2 | 899.4484  | 2 | 32.27 | 4        | F4:1574 | OB5942 H6 Ro.raw | 1.5688E3           | 1        | 1                      | 84    | 98  |                                       |                                                            | PEAKS DB  |
| R.LNAQRPDNRIESEGGYIETWNPNNQEFEC(+57.02)AGVALSR,L | N    | 75.05  | 4133.9248 | 36     | 2.4  | 1034.4910 | 4 | 33.87 | 6        | F6:1670 | OB5944 H6 Ro.raw | 1.3368E6           | 1        | 1                      | 37    | 72  | Carbamidomethylation                  | C29:Carbamidomethylation:1000.00                           | PEAKS DB  |
| R.NALRRPFYSNAPQEIFIQQGR,G                        | N    | 74.35  | 2504.3037 | 21     | 0.3  | 627.0834  | 4 | 33.30 | 4        | F4:1641 | OB5942 H6 Ro.raw | 1.8121E5           | 4        | 4                      | 78    | 98  |                                       |                                                            | PEAKS DB  |
| R.GYFGLIFPGC(+57.02)PSTYEPAQQGR,Y                | N    | 73.07  | 2629.2383 | 23     | 1.4  | 877.4213  | 3 | 35.30 | 5        | F5:1733 | OB5943 H6 Ro.raw | 1.2125E6           | 3        | 3                      | 99    | 121 | Carbamidomethylation                  | C10:Carbamidomethylation:1000.00                           | PEAKS DB  |
| R.IESEGGYIETWNPNNQ(+.98)EFEC(+57.02)AGVALSR,L    | N    | 62.09  | 3070.3613 | 27     | 6.0  | 1024.4672 | 3 | 34.92 | 5        | F5:1736 | OB5943 H6 Ro.raw | 6.6817E3           | 1        | 1                      | 46    | 72  | Carbamidomethylation                  | Q16:Deamidation (NQ):0.00;C20:Carbamidomethylation:1000.00 | PEAKS DB  |
| R.VYDEELQEGHVLVVPQN(+.98)FAVAGK,S                | N    | 61.03  | 2541.2751 | 23     | 9.5  | 1271.6569 | 2 | 32.92 | 4        | F4:1618 | OB5942 H6 Ro.raw | 3.629E3            | 1        | 1                      | 435   | 457 |                                       | N17:Deamidation (NQ):14.02                                 | PEAKS DB  |
| K.FFVPPFQQSPRA,V                                 | Y    | 60.07  | 1419.7299 | 12     | -1.0 | 710.8715  | 2 | 33.42 | 5        | F5:1644 | OB5943 H6 Ro.raw | 1.8963E4           | 1        | 1                      | 516   | 527 |                                       |                                                            | PEAKS DB  |
| K.TDSRPSIANLAGENSFIDNLPEEVAN(+.98)SYGLPR,E       | N    | 59.30  | 3545.7273 | 33     | 7.1  | 1182.9248 | 3 | 36.36 | 4        | F4:1812 | OB5942 H6 Ro.raw | 3.983E3            | 1        | 1                      | 470   | 502 | Deamidation (NQ)                      | N27:Deamidation (NQ):51.97                                 | PEAKS DB  |
| R.AHVQVVDNGN(+.98)RVYDEELQEGHVLVVPQNFAVAGK,S     | N    | 57.69  | 3817.9023 | 35     | 5.5  | 955.4881  | 4 | 33.48 | 6        | F6:1651 | OB5944 H6 Ro.raw | 7.3088E4           | 3        | 3                      | 423   | 457 |                                       | N11:Deamidation (NQ):0.00                                  | PEAKS DB  |
| N.GIEETIC(+71.04)TATVKK,N                        | N    | 51.71  | 1462.7701 | 13     | 0.9  | 732.3930  | 2 | 27.73 | 4        | F4:1307 | OB5942 H6 Ro.raw | 5.283E3            | 2        | 2                      | 345   | 357 | Propionamide                          | C7:Propionamide:1000.00                                    | PEAKS PTM |

total 45 peptides



| Peptide                                                | Uniq | -10lgP | Mass      | Length | ppm  | m/z       | z | RT    | Fraction | Scan    | Source File      | Area Roast Ara h 6 | #Feature | #Feature Roast Ara h 6 | Start | End | PTM                  | AScore                                                         | Found By  |
|--------------------------------------------------------|------|--------|-----------|--------|------|-----------|---|-------|----------|---------|------------------|--------------------|----------|------------------------|-------|-----|----------------------|----------------------------------------------------------------|-----------|
| R.AHVQ(+.98)VVDSNGNRVYDEELQEGHVLVVPQNFAVAGK.S          | N    | 49.13  | 3817.9023 | 35     | 0.9  | 955.4838  | 4 | 33.12 | 4        | F4:1624 | OB5942 H6 Ro.raw | 4.5408E4           | 1        | 1                      | 423   | 457 |                      | Q4:Deamidation (NQ):25.58                                      | PEAKS DB  |
| R.RFNLAGNHEQEFLR.Y                                     | N    | 45.43  | 1729.8647 | 14     | 0.9  | 577.6294  | 3 | 32.11 | 5        | F5:1568 | OB5943 H6 Ro.raw | 3.821E3            | 1        | 1                      | 195   | 208 |                      |                                                                | PEAKS DB  |
| W.LGLSAEYGNLYR.N                                       | N    | 43.06  | 1354.6881 | 12     | 3.5  | 678.3537  | 2 | 31.68 | 4        | F4:1539 | OB5942 H6 Ro.raw | 0                  | 0        | 0                      | 389   | 400 |                      |                                                                | PEAKS DB  |
| K.FFVPPFQQSP(+15.99)RA.V                               | Y    | 41.41  | 1435.7247 | 12     | 2.8  | 718.8716  | 2 | 32.73 | 6        | F6:1598 | OB5944 H6 Ro.raw | 3.9991E4           | 1        | 1                      | 516   | 527 |                      | P10:Oxidation o r Hydroxylation: 0.00                          | PEAKS PTM |
| R.AHVQVVDN(+.98)GN(+.98)RVYDEELQEGHVLVVPQNFAVAGK.S     | N    | 41.04  | 3818.8862 | 35     | 8.6  | 955.7371  | 4 | 34.33 | 5        | F5:1692 | OB5943 H6 Ro.raw | 0                  | 0        | 0                      | 423   | 457 |                      | N9:Deamidation (NQ):0.00;N11: Deamidation (N Q):0.00           | PEAKS DB  |
| R.AHVQ(+.98)VVDSNGNRVYDEELQEGHVLVVPQ(+.98)NFAVAGK.S    | N    | 40.14  | 3818.8862 | 35     | 8.9  | 955.7373  | 4 | 33.12 | 4        | F4:1624 | OB5942 H6 Ro.raw | 3.8034E4           | 1        | 1                      | 423   | 457 |                      | Q4:Deamidation (NQ):8.81;Q28: Deamidation (N Q):12.28          | PEAKS DB  |
| R.IESEGGYIETWN(+.98)PNNQEFEC(+57.02)AGVALSR.L          | N    | 40.05  | 3070.3613 | 27     | 6.9  | 1536.1985 | 2 | 34.73 | 5        | F5:1729 | OB5943 H6 Ro.raw | 2.6575E4           | 1        | 1                      | 46    | 72  | Carbamidomethylation | N12:Deamidatio n (NQ):0.00;C2 0:Carbamidome thylation:1000. 00 | PEAKS DB  |
| R.AHVQVVDNNGNRVYDEELQEGHVLVVPQNFAVAGK.S                | N    | 39.89  | 3816.9182 | 35     | -0.1 | 764.3909  | 5 | 33.91 | 5        | F5:1668 | OB5943 H6 Ro.raw | 0                  | 0        | 0                      | 423   | 457 |                      |                                                                | PEAKS DB  |
| N.GIEETIC(+71.04)TATVK.K                               | N    | 37.92  | 1334.6752 | 12     | 1.9  | 668.3461  | 2 | 29.63 | 6        | F6:1421 | OB5944 H6 Ro.raw | 0                  | 0        | 0                      | 345   | 356 | Propionamide         | C7:Propionamid e:1000.00                                       | PEAKS PTM |
| R.W(+15.99)LGLSAEYGNLYR.N                              | N    | 37.59  | 1556.7623 | 13     | -0.8 | 779.3878  | 2 | 34.26 | 4        | F4:1698 | OB5942 H6 Ro.raw | 3.8864E3           | 1        | 1                      | 388   | 400 | Oxidation (HW)       | W1:Oxidation (HW):1000.00                                      | PEAKS PTM |
| R.AHVQVVDN(+.98)GNRVYDEELQEGHVLVVPQNFAVAGK.S           | N    | 36.89  | 3817.9023 | 35     | 2.2  | 955.4850  | 4 | 33.52 | 5        | F5:1663 | OB5943 H6 Ro.raw | 4.5408E4           | 1        | 1                      | 423   | 457 |                      | N9:Deamidation (NQ):9.40                                       | PEAKS DB  |
| R.NALFVPH(+14.02)YNTNAHSIIYALR.G                       | N    | 36.41  | 2327.2175 | 20     | 2.7  | 776.7485  | 3 | 36.25 | 5        | F5:1805 | OB5943 H6 Ro.raw | 1.569E4            | 1        | 1                      | 401   | 420 |                      | H7:Methylation (others):4.52                                   | PEAKS PTM |
| R.LNAQRPDNRIESEGGYIETWNPNN(+.98)QEFEC(+57.02)AGVALSR.L | N    | 36.07  | 4134.9087 | 36     | 4.7  | 1379.3167 | 3 | 33.85 | 6        | F6:1671 | OB5944 H6 Ro.raw | 8.0788E4           | 1        | 1                      | 37    | 72  | Carbamidomethylation | N24:Deamidatio n (NQ):0.00;C2 9:Carbamidome thylation:1000. 00 | PEAKS DB  |
| R.GYFGLIFPGC(+58.01)PSTYEPAQQGR.R                      | N    | 35.93  | 2474.1211 | 22     | 4.1  | 1238.0729 | 2 | 38.39 | 6        | F6:1932 | OB5944 H6 Ro.raw | 0                  | 0        | 0                      | 99    | 120 | Carboxymethyl        | C10:Carboxyme thyl:1000.00                                     | PEAKS PTM |
| R.GYFGLIFPGC(+71.04)PSTYEPAQQGR.Y                      | N    | 35.48  | 2643.2539 | 23     | 1.6  | 882.0933  | 3 | 34.83 | 4        | F4:1720 | OB5942 H6 Ro.raw | 3.8119E4           | 1        | 1                      | 99    | 121 | Propionamide         | C10:Propionami de:1000.00                                      | PEAKS PTM |
| R.GYFGLIFPGC(+57.02)PSTYEPAQQGR(+14.02)R.Y             | N    | 34.44  | 2643.2539 | 23     | 1.0  | 882.0928  | 3 | 35.30 | 5        | F5:1741 | OB5943 H6 Ro.raw | 3.3639E4           | 1        | 1                      | 99    | 121 | Carbamidomethylation | C10:Carbamido methylation:10 00.00;R22:Meth ylation(KR):0.0 0  | PEAKS PTM |
| K.TDSRPSIANLAGENSFIDN(+.98)LPeeVVANSYGLPR.E            | N    | 33.13  | 3545.7273 | 33     | 3.8  | 1182.9209 | 3 | 39.27 | 5        | F5:1978 | OB5943 H6 Ro.raw | 0                  | 0        | 0                      | 470   | 502 |                      | N19:Deamidatio n (NQ):8.41                                     | PEAKS DB  |

total 45 peptides

| Peptide                  | Uniq | -10lgP | Mass      | Length | ppm  | m/z      | z | RT    | Fraction | Scan    | Source File      | Area Roast Ara h 6 | #Feature | #Feature Roast Ara h 6 | Start | End | PTM | AScore                                    | Found By  |
|--------------------------|------|--------|-----------|--------|------|----------|---|-------|----------|---------|------------------|--------------------|----------|------------------------|-------|-----|-----|-------------------------------------------|-----------|
| K.SQSE(+53.92)NFEYVAFK.T | N    | 32.70  | 1501.5812 | 12     | -0.3 | 751.7976 | 2 | 31.36 | 4        | F4:1520 | OB5942 H6 Ro.raw | 0                  | 0        | 0                      | 458   | 469 |     | E4:Replacement of 2 protons by iron:22.45 | PEAKS PTM |
| total 45 peptides        |      |        |           |        |      |          |   |       |          |         |                  |                    |          |                        |       |     |     |                                           |           |

Q9FZ11|Q9FZ11\_ARAHY

back to list

| Protein Coverage | Supporting Peptides |

Protein Coverage:

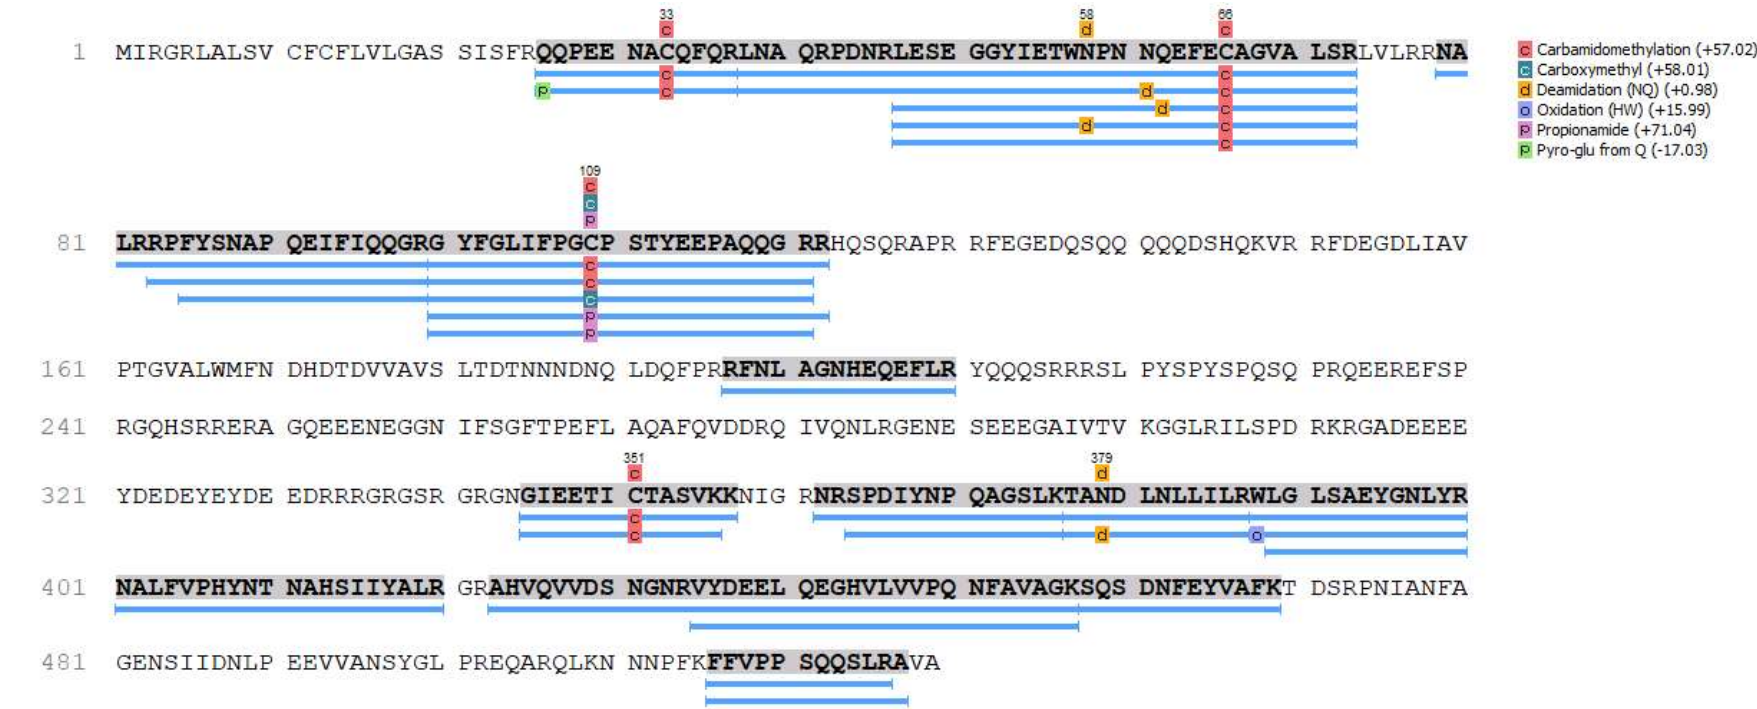

Supporting Peptides:

| Peptide                           | Uniq | -10lgP | Mass      | Length | ppm | m/z       | z | RT    | Fraction | Scan    | Source File      | Area Roast Ara h 6 | #Feature | #Feature Roast Ara h 6 | Start | End | PTM                  | AScore                             | Found By |
|-----------------------------------|------|--------|-----------|--------|-----|-----------|---|-------|----------|---------|------------------|--------------------|----------|------------------------|-------|-----|----------------------|------------------------------------|----------|
| R.GYFGLIFPGC(+57.02)PSTYEPAQQGR.R | N    | 142.29 | 2473.1372 | 22     | 1.5 | 1237.5778 | 2 | 36.17 | 4        | F4:1794 | OB5942 H6 Ro.raw | 1.0118E6           | 3        | 3                      | 100   | 121 | Carbamidomethylation | C10:Carbamido methylation:100 0.00 | PEAKS DB |
| R.WLGLSAEYGNLYR.N                 | N    | 136.28 | 1540.7673 | 13     | 2.0 | 771.3925  | 2 | 34.64 | 4        | F4:1712 | OB5942 H6 Ro.raw | 2.2268E6           | 6        | 6                      | 388   | 400 |                      |                                    | PEAKS DB |
| K.SQSDNFEYVAFK.T                  | N    | 124.69 | 1433.6462 | 12     | 1.5 | 717.8315  | 2 | 31.43 | 4        | F4:1526 | OB5942 H6 Ro.raw | 3.2229E5           | 3        | 3                      | 458   | 469 |                      |                                    | PEAKS DB |
| R.RPFYSNAPQEIFIQQGR.G             | N    | 119.86 | 2050.0383 | 17     | 2.0 | 684.3547  | 3 | 32.67 | 5        | F5:1597 | OB5943 H6 Ro.raw | 3.2279E6           | 6        | 6                      | 83    | 99  |                      |                                    | PEAKS DB |
| total 41 peptides                 |      |        |           |        |     |           |   |       |          |         |                  |                    |          |                        |       |     |                      |                                    |          |



| Peptide                                          | Uniq | -10lgP | Mass      | Length | ppm  | m/z       | z | RT    | Fraction | Scan    | Source File      | Area Roast Ara h 6 | #Feature | #Feature Roast Ara h 6 | Start | End | PTM                                   | AScore                                                       | Found By  |
|--------------------------------------------------|------|--------|-----------|--------|------|-----------|---|-------|----------|---------|------------------|--------------------|----------|------------------------|-------|-----|---------------------------------------|--------------------------------------------------------------|-----------|
| R.NRSPDIYNPQAGSLK.T                              | N    | 114.42 | 1658.8376 | 15     | 0.1  | 830.4261  | 2 | 27.65 | 5        | F5:1291 | OB5943 H6 Ro.raw | 4.04E5             | 6        | 6                      | 362   | 376 |                                       |                                                              | PEAKS DB  |
| R.SPDIYNPQAGSLK.T                                | N    | 102.05 | 1388.6936 | 13     | 0.9  | 695.3547  | 2 | 28.77 | 5        | F5:1355 | OB5943 H6 Ro.raw | 7.3513E5           | 3        | 3                      | 364   | 376 |                                       |                                                              | PEAKS DB  |
| K.FFVPPSQQLR.A                                   | Y    | 100.14 | 1304.6876 | 11     | 0.4  | 653.3513  | 2 | 30.45 | 5        | F5:1467 | OB5943 H6 Ro.raw | 1.2956E5           | 3        | 3                      | 516   | 526 |                                       |                                                              | PEAKS DB  |
| N.GIEETIC(+57.02)TASVK.K                         | N    | 98.34  | 1306.6438 | 12     | -0.1 | 654.3291  | 2 | 29.14 | 5        | F5:1389 | OB5943 H6 Ro.raw | 7.3439E4           | 3        | 3                      | 345   | 356 | Carbamidomethylation                  | C7:Carbamidomethylation:1000.00                              | PEAKS DB  |
| R.NALFVPHYNTNAHSIIYALR.G                         | N    | 97.15  | 2313.2019 | 20     | -0.1 | 772.0745  | 3 | 35.38 | 6        | F6:1747 | OB5944 H6 Ro.raw | 2.7972E6           | 8        | 8                      | 401   | 420 |                                       |                                                              | PEAKS DB  |
| R.GYFGLIFPGC(+71.04)PSTYEPAQQGR.R                | N    | 92.77  | 2487.1528 | 22     | 2.2  | 1244.5864 | 2 | 36.43 | 5        | F5:1817 | OB5943 H6 Ro.raw | 8.0086E4           | 3        | 3                      | 100   | 121 | Propionamide                          | C10:Propionamide:1000,00                                     | PEAKS PTM |
| R.VYDEELQEGHVLVVPQNFAVAGK.S                      | N    | 89.66  | 2540.2910 | 23     | 2.7  | 847.7732  | 3 | 32.92 | 4        | F4:1613 | OB5942 H6 Ro.raw | 4.6093E5           | 4        | 4                      | 435   | 457 |                                       |                                                              | PEAKS DB  |
| N.GIEETIC(+57.02)TASVKK.N                        | N    | 88.49  | 1434.7388 | 13     | 0.0  | 718.3766  | 2 | 27.14 | 5        | F5:1263 | OB5943 H6 Ro.raw | 1.4573E5           | 4        | 4                      | 345   | 357 | Carbamidomethylation                  | C7:Carbamidomethylation:1000.00                              | PEAKS DB  |
| R.Q(-17.03)QPEENAC(+57.02)QFQR.L                 | N    | 88.35  | 1516.6365 | 12     | 2.5  | 759.3274  | 2 | 28.03 | 5        | F5:1319 | OB5943 H6 Ro.raw | 7.279E3            | 2        | 2                      | 26    | 37  | Pyro-glu from Q; Carbamidomethylation | Q1:Pyro-glu from Q:1000,00;C8:Carbamidomethylation:1000.00   | PEAKS PTM |
| R.LESEGGYIETWNPNNQEFEC(+57.02)AGVALSR.L          | N    | 85.95  | 3069.3774 | 27     | 5.5  | 1024.1387 | 3 | 34.81 | 5        | F5:1720 | OB5943 H6 Ro.raw | 1.0361E4           | 1        | 1                      | 47    | 73  | Carbamidomethylation                  | C20:Carbamidomethylation:1000,00                             | PEAKS DB  |
| R.QQPEENAC(+57.02)QFQR.L                         | N    | 84.17  | 1533.6630 | 12     | 1.7  | 767.8400  | 2 | 25.24 | 5        | F5:1157 | OB5943 H6 Ro.raw | 3.7544E4           | 3        | 3                      | 26    | 37  | Carbamidomethylation                  | C8:Carbamidomethylation:1000.00                              | PEAKS DB  |
| K.FFVPPSQQLRA.V                                  | Y    | 81.44  | 1375.7247 | 12     | 0.5  | 688.8700  | 2 | 31.01 | 5        | F5:1500 | OB5943 H6 Ro.raw | 2.4638E5           | 3        | 3                      | 516   | 527 |                                       |                                                              | PEAKS DB  |
| K.TANDLNLILR.W                                   | N    | 76.99  | 1254.7296 | 11     | -0.2 | 628.3719  | 2 | 34.73 | 5        | F5:1761 | OB5943 H6 Ro.raw | 9.7454E5           | 3        | 3                      | 377   | 387 |                                       |                                                              | PEAKS DB  |
| P.FYSNAPQEIFIQQGR.G                              | N    | 76.66  | 1796.8845 | 15     | -1.2 | 899.4484  | 2 | 32.27 | 4        | F4:1574 | OB5942 H6 Ro.raw | 1.5688E3           | 1        | 1                      | 85    | 99  |                                       |                                                              | PEAKS DB  |
| R.LNAQRPDNRLESEGGYIETWNPNNQEFEC(+57.02)AGVALSR.L | N    | 75.05  | 4133.9248 | 36     | 2.4  | 1034.4910 | 4 | 33.87 | 6        | F6:1670 | OB5944 H6 Ro.raw | 1.3368E6           | 1        | 1                      | 38    | 73  | Carbamidomethylation                  | C29:Carbamidomethylation:1000,00                             | PEAKS DB  |
| R.NALRRPFYSNAPQEIFIQQGR.G                        | N    | 74.35  | 2504.3037 | 21     | 0.3  | 627.0834  | 4 | 33.30 | 4        | F4:1641 | OB5942 H6 Ro.raw | 1.8121E5           | 4        | 4                      | 79    | 99  |                                       |                                                              | PEAKS DB  |
| R.GYFGLIFPGC(+57.02)PSTYEPAQQGR.H                | N    | 73.07  | 2629.2383 | 23     | 1.4  | 877.4213  | 3 | 35.30 | 5        | F5:1733 | OB5943 H6 Ro.raw | 1.2125E6           | 3        | 3                      | 100   | 122 | Carbamidomethylation                  | C10:Carbamidomethylation:1000,00                             | PEAKS DB  |
| K.FFVPPSQQ(+.98)SLR.A                            | Y    | 67.31  | 1305.6716 | 11     | 2.9  | 653.8450  | 2 | 30.71 | 4        | F4:1484 | OB5942 H6 Ro.raw | 2.6275E4           | 2        | 2                      | 516   | 526 |                                       | Q8:Deamidation(NQ):8.69                                      | PEAKS DB  |
| R.LESEGGYIETWNPNNQ(+.98)EFEC(+57.02)AGVALSR.L    | N    | 62.09  | 3070.3613 | 27     | 6.0  | 1024.4672 | 3 | 34.92 | 5        | F5:1736 | OB5943 H6 Ro.raw | 6.6817E3           | 1        | 1                      | 47    | 73  | Deamidation(NQ); Carbamidomethylation | Q16:Deamidation(NQ):1000,00;C20:Carbamidomethylation:1000,00 | PEAKS DB  |

total 41 peptides

| Peptide                                               | Uniq | -10lgP | Mass      | Length | ppm  | m/z       | z | RT    | Fraction | Scan    | Source File      | Area Roast Ara h 6 | #Feature | #Feature Roast Ara h 6 | Start | End | PTM                                    | AScore                                                                         | Found By  |
|-------------------------------------------------------|------|--------|-----------|--------|------|-----------|---|-------|----------|---------|------------------|--------------------|----------|------------------------|-------|-----|----------------------------------------|--------------------------------------------------------------------------------|-----------|
| R.VYDEELQEGHVLVVPQN(+.98)FAVAGK.S                     | N    | 61.03  | 2541.2751 | 23     | 9.5  | 1271.6569 | 2 | 32.92 | 4        | F4:1618 | OB5942 H6 Ro.raw | 3.629E3            | 1        | 1                      | 435   | 457 |                                        | N17:Deamidation (NQ):14.02                                                     | PEAKS DB  |
| R.AHVQVVDSDNGN(+.98)RVYDEELQEGHVLVVPQNFAVAGK.S        | N    | 57.69  | 3817.9023 | 35     | 5.5  | 955.4881  | 4 | 33.48 | 6        | F6:1651 | OB5944 H6 Ro.raw | 7.3088E4           | 3        | 3                      | 423   | 457 |                                        | N11:Deamidation (NQ):0.00                                                      | PEAKS DB  |
| K.TAN(+.98)DLNLLILR.W                                 | N    | 56.97  | 1255.7136 | 11     | 2.6  | 628.8657  | 2 | 35.22 | 4        | F4:1745 | OB5942 H6 Ro.raw | 0                  | 0        | 0                      | 377   | 387 | Deamidation (NQ)                       | N3:Deamidation (NQ):68.31                                                      | PEAKS DB  |
| R.AHVQ(+.98)VVDSDNGNRVYDEELQEGHVLVVPQNFAVAGK.S        | N    | 49.13  | 3817.9023 | 35     | 0.9  | 955.4838  | 4 | 33.12 | 4        | F4:1624 | OB5942 H6 Ro.raw | 4.5408E4           | 1        | 1                      | 423   | 457 |                                        | Q4:Deamidation (NQ):25.58                                                      | PEAKS DB  |
| R.RFNLAGNHEQEFLR.Y                                    | N    | 45.43  | 1729.8647 | 14     | 0.9  | 577.6294  | 3 | 32.11 | 5        | F5:1568 | OB5943 H6 Ro.raw | 3.821E3            | 1        | 1                      | 197   | 210 |                                        |                                                                                | PEAKS DB  |
| W.LGLSAEYGNLYR.N                                      | N    | 43.06  | 1354.6881 | 12     | 3.5  | 678.3537  | 2 | 31.68 | 4        | F4:1539 | OB5942 H6 Ro.raw | 0                  | 0        | 0                      | 389   | 400 |                                        |                                                                                | PEAKS DB  |
| N.G(+57.02)IEETIC(+57.02)TASVKK.N                     | N    | 42.25  | 1491.7603 | 13     | 8.7  | 746.8939  | 2 | 26.96 | 4        | F4:1261 | OB5942 H6 Ro.raw | 1.3952E4           | 2        | 2                      | 345   | 357 | Carbamidomethylation                   | G1:Carbamidomethylation (DHKE, X@N-term):32.28;C7:Carbamidomethylation:1000.00 | PEAKS PTM |
| R.AHVQVVDSDN(+.98)GN(+.98)RVYDEELQEGHVLVVPQNFAVAGK.S  | N    | 41.04  | 3818.8862 | 35     | 8.6  | 955.7371  | 4 | 34.33 | 5        | F5:1692 | OB5943 H6 Ro.raw | 0                  | 0        | 0                      | 423   | 457 |                                        | N9:Deamidation (NQ):0.00;N11:Deamidation (NQ):0.00                             | PEAKS DB  |
| R.AHVQ(+.98)VVDSDNGNRVYDEELQEGHVLVVPQ(+.98)NFAVAGK.S  | N    | 40.14  | 3818.8862 | 35     | 8.9  | 955.7373  | 4 | 33.12 | 4        | F4:1624 | OB5942 H6 Ro.raw | 3.8034E4           | 1        | 1                      | 423   | 457 |                                        | Q4:Deamidation (NQ):8.81;Q28:Deamidation (NQ):12.28                            | PEAKS DB  |
| R.LESEGGYIETWN(+.98)PNNQEFEC(+57.02)AGVALSR.L         | N    | 40.05  | 3070.3613 | 27     | 6.9  | 1536.1985 | 2 | 34.73 | 5        | F5:1729 | OB5943 H6 Ro.raw | 2.6575E4           | 1        | 1                      | 47    | 73  | Deamidation (NQ); Carbamidomethylation | N12:Deamidation (NQ):1000.00; C20:Carbamidomethylation:1000.00                 | PEAKS DB  |
| R.AHVQVVDSDNGNRVYDEELQEGHVLVVPQNFAVAGK.S              | N    | 39.89  | 3816.9182 | 35     | -0.1 | 764.3909  | 5 | 33.91 | 5        | F5:1668 | OB5943 H6 Ro.raw | 0                  | 0        | 0                      | 423   | 457 |                                        |                                                                                | PEAKS DB  |
| R.W(+15.99)LGLSAEYGNLYR.N                             | N    | 37.59  | 1556.7623 | 13     | -0.8 | 779.3878  | 2 | 34.26 | 4        | F4:1698 | OB5942 H6 Ro.raw | 3.8864E3           | 1        | 1                      | 388   | 400 | Oxidation (HW)                         | W1:Oxidation (HW):1000.00                                                      | PEAKS PTM |
| R.AHVQVVDSDN(+.98)GNRVYDEELQEGHVLVVPQNFAVAGK.S        | N    | 36.89  | 3817.9023 | 35     | 2.2  | 955.4850  | 4 | 33.52 | 5        | F5:1663 | OB5943 H6 Ro.raw | 4.5408E4           | 1        | 1                      | 423   | 457 |                                        | N9:Deamidation (NQ):9.40                                                       | PEAKS DB  |
| R.NALFVPH(+14.02)YNTNAHSIIYALR.G                      | N    | 36.41  | 2327.2175 | 20     | 2.7  | 776.7485  | 3 | 36.25 | 5        | F5:1805 | OB5943 H6 Ro.raw | 1.569E4            | 1        | 1                      | 401   | 420 |                                        | H7:Methylation (others):4.52                                                   | PEAKS PTM |
| R.LNAQRPDNRLESEGGYIETWNPNN(+.98)QEFC(+57.02)AGVALSR.L | N    | 36.07  | 4134.9087 | 36     | 4.7  | 1379.3167 | 3 | 33.85 | 6        | F6:1671 | OB5944 H6 Ro.raw | 8.0788E4           | 1        | 1                      | 38    | 73  | Deamidation (NQ); Carbamidomethylation | N24:Deamidation (NQ):1000.00; C29:Carbamidomethylation:1000.00                 | PEAKS DB  |
| R.GYFGLIFPGC(+58.01)PSTYEPAQQGR.R                     | N    | 35.93  | 2474.1211 | 22     | 4.1  | 1238.0729 | 2 | 38.39 | 6        | F6:1932 | OB5944 H6 Ro.raw | 0                  | 0        | 0                      | 100   | 121 | Carboxymethyl                          | C10:Carboxymethyl:1000.00                                                      | PEAKS PTM |
| R.GYFGLIFPGC(+71.04)PSTYEPAQQGRR.H                    | N    | 35.48  | 2643.2539 | 23     | 1.6  | 882.0933  | 3 | 34.83 | 4        | F4:1720 | OB5942 H6 Ro.raw | 3.8119E4           | 1        | 1                      | 100   | 122 | Propionamide                           | C10:Propionamide:1000.00                                                       | PEAKS PTM |

total 41 peptides

| Peptide                                     | Uniq | -10lgP | Mass      | Length | ppm | m/z      | z | RT    | Fraction | Scan    | Source File      | Area Roast Ara h 6 | #Feature | #Feature Roast Ara h 6 | Start | End | PTM                  | AScore                                                       | Found By  |
|---------------------------------------------|------|--------|-----------|--------|-----|----------|---|-------|----------|---------|------------------|--------------------|----------|------------------------|-------|-----|----------------------|--------------------------------------------------------------|-----------|
| R.GYFGLIFPGC(+57.02)PSTYEEPAQQGR(+14.02)R.H | N    | 34.44  | 2643.2539 | 23     | 1.0 | 882.0928 | 3 | 35.30 | 5        | F5:1741 | OB5943 H6 Ro.raw | 3.3639E4           | 1        | 1                      | 100   | 122 | Carbamidomethylation | C10:Carbamido methylation:100 0.00;R22:Methyl ation(KR):0.00 | PEAKS PTM |
| total 41 peptides                           |      |        |           |        |     |          |   |       |          |         |                  |                    |          |                        |       |     |                      |                                                              |           |

Q647H3|Q647H3\_ARAHY

[back to list](#)

[Protein Coverage](#) | [Supporting Peptides](#) |

Protein Coverage:

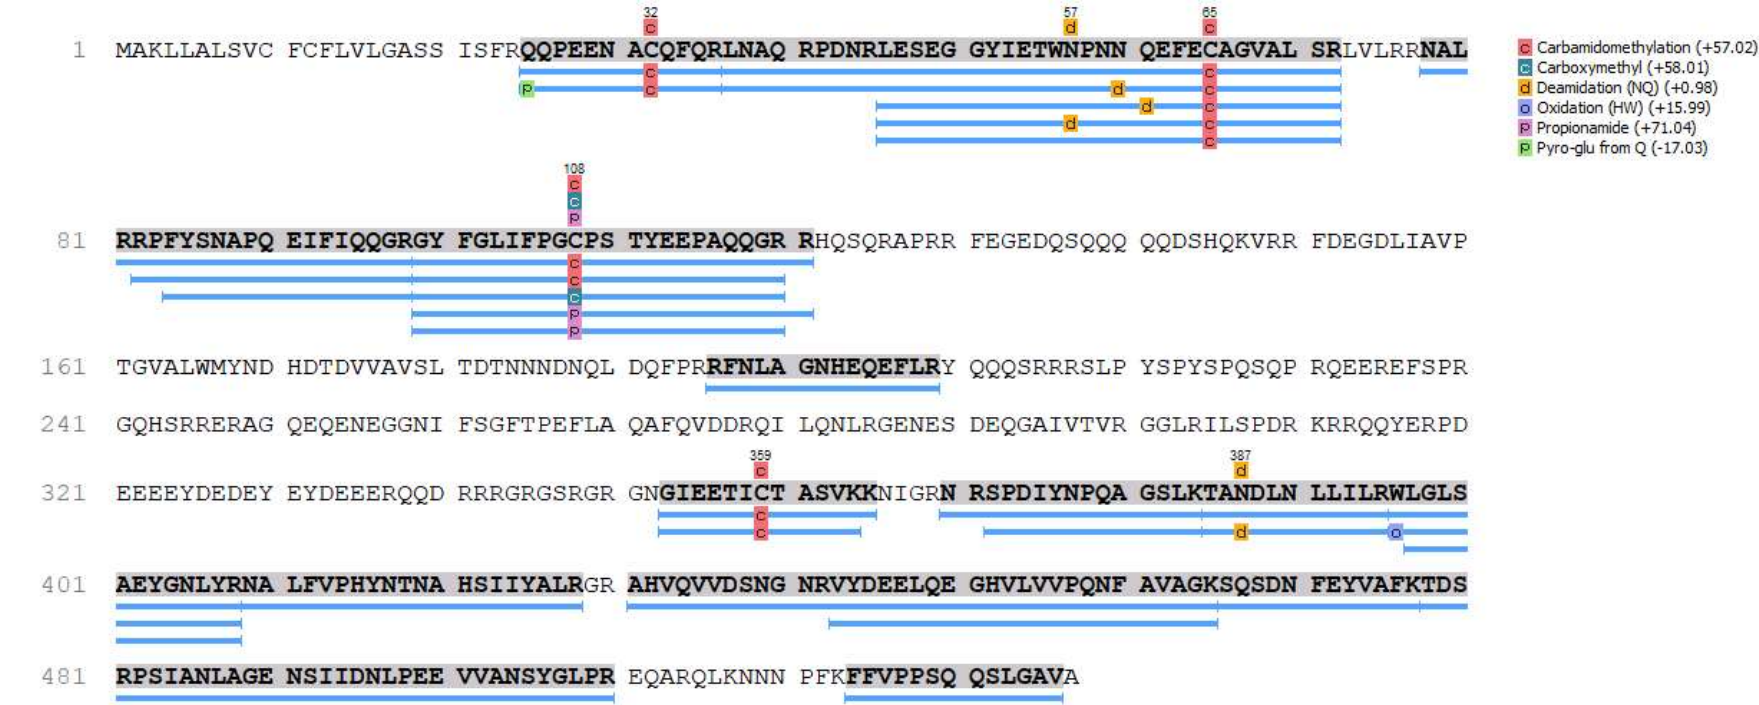

Supporting Peptides:

| Peptide                            | Uniq | -10lgP | Mass      | Length | ppm | m/z       | z | RT    | Fraction | Scan    | Source File      | Area Roast Ara h 6 | #Feature | #Feature Roast Ara h 6 | Start | End | PTM                  | AScore                             | Found By |
|------------------------------------|------|--------|-----------|--------|-----|-----------|---|-------|----------|---------|------------------|--------------------|----------|------------------------|-------|-----|----------------------|------------------------------------|----------|
| R.GYFGLIFPGC(+57.02)PSTYEEPAQQGR.R | N    | 142.29 | 2473.1372 | 22     | 1.5 | 1237.5778 | 2 | 36.17 | 4        | F4:1794 | OB5942 H6 Ro.raw | 1.0118E6           | 3        | 3                      | 99    | 120 | Carbamidomethylation | C10:Carbamido methylation:100 0.00 | PEAKS DB |
| R.WLGLSAEYGNLYR.N                  | N    | 136.28 | 1540.7673 | 13     | 2.0 | 771.3925  | 2 | 34.64 | 4        | F4:1712 | OB5942 H6 Ro.raw | 2.2268E6           | 6        | 6                      | 396   | 408 |                      |                                    | PEAKS DB |
| K.SQSDNFEYVAFK.T                   | N    | 124.69 | 1433.6462 | 12     | 1.5 | 717.8315  | 2 | 31.43 | 4        | F4:1526 | OB5942 H6 Ro.raw | 3.2229E5           | 3        | 3                      | 466   | 477 |                      |                                    | PEAKS DB |

|                   |
|-------------------|
| total 40 peptides |
|-------------------|

| Peptide                                          | Uniq | -10lgP | Mass      | Length | ppm  | m/z       | z | RT    | Fraction | Scan    | Source File      | Area Roast Ara h 6 | #Feature | #Feature Roast Ara h 6 | Start | End | PTM                                    | AScore                                                        | Found By  |
|--------------------------------------------------|------|--------|-----------|--------|------|-----------|---|-------|----------|---------|------------------|--------------------|----------|------------------------|-------|-----|----------------------------------------|---------------------------------------------------------------|-----------|
| R.RPFYSNAPQEIFIQQGR.G                            | N    | 119.86 | 2050.0383 | 17     | 2.0  | 684.3547  | 3 | 32.67 | 5        | F5:1597 | OB5943 H6 Ro.raw | 3.2279E6           | 6        | 6                      | 82    | 98  |                                        |                                                               | PEAKS DB  |
| R.NRSPDIYNPQAGSLK.T                              | N    | 114.42 | 1658.8376 | 15     | 0.1  | 830.4261  | 2 | 27.65 | 5        | F5:1291 | OB5943 H6 Ro.raw | 4.04E5             | 6        | 6                      | 370   | 384 |                                        |                                                               | PEAKS DB  |
| R.SPDYINPQAGSLK.T                                | N    | 102.05 | 1388.6936 | 13     | 0.9  | 695.3547  | 2 | 28.77 | 5        | F5:1355 | OB5943 H6 Ro.raw | 7.3513E5           | 3        | 3                      | 372   | 384 |                                        |                                                               | PEAKS DB  |
| N.GIEETIC(+57.02)TASVK.K                         | N    | 98.34  | 1306.6438 | 12     | -0.1 | 654.3291  | 2 | 29.14 | 5        | F5:1389 | OB5943 H6 Ro.raw | 7.3439E4           | 3        | 3                      | 353   | 364 | Carbamidomethylation                   | C7:Carbamidomethylation:1000.00                               | PEAKS DB  |
| R.NALFVPHYNTNAHSIIYALR.G                         | N    | 97.15  | 2313.2019 | 20     | -0.1 | 772.0745  | 3 | 35.38 | 6        | F6:1747 | OB5944 H6 Ro.raw | 2.7972E6           | 8        | 8                      | 409   | 428 |                                        |                                                               | PEAKS DB  |
| R.GYFGLIFPGC(+71.04)PSTYEPAQQGR.R                | N    | 92.77  | 2487.1528 | 22     | 2.2  | 1244.5864 | 2 | 36.43 | 5        | F5:1817 | OB5943 H6 Ro.raw | 8.0086E4           | 3        | 3                      | 99    | 120 | Propionamide                           | C10:Propionamide:1000,00                                      | PEAKS PTM |
| R.VYDEELQEGHVLVPQNFAVAGK.S                       | N    | 89.66  | 2540.2910 | 23     | 2.7  | 847.7732  | 3 | 32.92 | 4        | F4:1613 | OB5942 H6 Ro.raw | 4.6093E5           | 4        | 4                      | 443   | 465 |                                        |                                                               | PEAKS DB  |
| N.GIEETIC(+57.02)TASVK.K                         | N    | 88.49  | 1434.7388 | 13     | 0.0  | 718.3766  | 2 | 27.14 | 5        | F5:1263 | OB5943 H6 Ro.raw | 1.4573E5           | 4        | 4                      | 353   | 365 | Carbamidomethylation                   | C7:Carbamidomethylation:1000.00                               | PEAKS DB  |
| R.Q(-17.03)QPEENAC(+57.02)QFQR.L                 | N    | 88.35  | 1516.6365 | 12     | 2.5  | 759.3274  | 2 | 28.03 | 5        | F5:1319 | OB5943 H6 Ro.raw | 7.279E3            | 2        | 2                      | 25    | 36  | Pyro-glu from Q; Carbamidomethylation  | Q1:Pyro-glu from Q:1000,00;C8:Carbamidomethylation:1000.00    | PEAKS PTM |
| R.LESEGGYIETWNPNNQEFEC(+57.02)AGVALSR.L          | N    | 85.95  | 3069.3774 | 27     | 5.5  | 1024.1387 | 3 | 34.81 | 5        | F5:1720 | OB5943 H6 Ro.raw | 1.0361E4           | 1        | 1                      | 46    | 72  | Carbamidomethylation                   | C20:Carbamidomethylation:1000,00                              | PEAKS DB  |
| R.QQPEENAC(+57.02)QFQR.L                         | N    | 84.17  | 1533.6630 | 12     | 1.7  | 767.8400  | 2 | 25.24 | 5        | F5:1157 | OB5943 H6 Ro.raw | 3.7544E4           | 3        | 3                      | 25    | 36  | Carbamidomethylation                   | C8:Carbamidomethylation:1000.00                               | PEAKS DB  |
| K.TDSRPSIANLAGENSIIDNLPEEVVANSYGLPR.E            | Y    | 83.71  | 3510.7590 | 33     | 1.6  | 1171.2622 | 3 | 37.05 | 6        | F6:1855 | OB5944 H6 Ro.raw | 8.6281E5           | 4        | 4                      | 478   | 510 |                                        |                                                               | PEAKS DB  |
| K.TANDLNLILR.W                                   | N    | 76.99  | 1254.7296 | 11     | -0.2 | 628.3719  | 2 | 34.73 | 5        | F5:1761 | OB5943 H6 Ro.raw | 9.7454E5           | 3        | 3                      | 385   | 395 |                                        |                                                               | PEAKS DB  |
| P.FYSNAPQEIFIQQGR.G                              | N    | 76.66  | 1796.8845 | 15     | -1.2 | 899.4484  | 2 | 32.27 | 4        | F4:1574 | OB5942 H6 Ro.raw | 1.5688E3           | 1        | 1                      | 84    | 98  |                                        |                                                               | PEAKS DB  |
| R.LNAQRPDNRLESEGGYIETWNPNNQEFEC(+57.02)AGVALSR.L | N    | 75.05  | 4133.9248 | 36     | 2.4  | 1034.4910 | 4 | 33.87 | 6        | F6:1670 | OB5944 H6 Ro.raw | 1.3368E6           | 1        | 1                      | 37    | 72  | Carbamidomethylation                   | C29:Carbamidomethylation:1000,00                              | PEAKS DB  |
| R.NALRRPFYSNAPQEIFIQQGR.G                        | N    | 74.35  | 2504.3037 | 21     | 0.3  | 627.0834  | 4 | 33.30 | 4        | F4:1641 | OB5942 H6 Ro.raw | 1.8121E5           | 4        | 4                      | 78    | 98  |                                        |                                                               | PEAKS DB  |
| R.GYFGLIFPGC(+57.02)PSTYEPAQQGR.H                | N    | 73.07  | 2629.2383 | 23     | 1.4  | 877.4213  | 3 | 35.30 | 5        | F5:1733 | OB5943 H6 Ro.raw | 1.2125E6           | 3        | 3                      | 99    | 121 | Carbamidomethylation                   | C10:Carbamidomethylation:1000,00                              | PEAKS DB  |
| R.LESEGGYIETWNPNNQ(+.98)EFEC(+57.02)AGVALSR.L    | N    | 62.09  | 3070.3613 | 27     | 6.0  | 1024.4672 | 3 | 34.92 | 5        | F5:1736 | OB5943 H6 Ro.raw | 6.6817E3           | 1        | 1                      | 46    | 72  | Deamidation (NQ); Carbamidomethylation | Q16:Deamidation (NQ):1000,00;C20:Carbamidomethylation:1000,00 | PEAKS DB  |
| R.VYDEELQEGHVLVPQN(+.98)FAVAGK.S                 | N    | 61.03  | 2541.2751 | 23     | 9.5  | 1271.6569 | 2 | 32.92 | 4        | F4:1618 | OB5942 H6 Ro.raw | 3.629E3            | 1        | 1                      | 443   | 465 |                                        | N17:Deamidation (NQ):14.02                                    | PEAKS DB  |

total 40 peptides

| Peptide                                               | Uniq | -10lgP | Mass      | Length | ppm  | m/z       | z | RT    | Fraction | Scan    | Source File      | Area Roast Ara h 6 | #Feature | #Feature Roast Ara h 6 | Start | End | PTM                                    | AScore                                                                         | Found By  |
|-------------------------------------------------------|------|--------|-----------|--------|------|-----------|---|-------|----------|---------|------------------|--------------------|----------|------------------------|-------|-----|----------------------------------------|--------------------------------------------------------------------------------|-----------|
| R.AHVQVVDNSGN(+.98)RVYDEELQEGHVLVVPQNFAVAGK.S         | N    | 57.69  | 3817.9023 | 35     | 5.5  | 955.4881  | 4 | 33.48 | 6        | F6:1651 | OB5944 H6 Ro.raw | 7.3088E4           | 3        | 3                      | 431   | 465 |                                        | N11:Deamidation (NQ):0.00                                                      | PEAKS DB  |
| K.TAN(+.98)DLNLLILR.W                                 | N    | 56.97  | 1255.7136 | 11     | 2.6  | 628.8657  | 2 | 35.22 | 4        | F4:1745 | OB5942 H6 Ro.raw | 0                  | 0        | 0                      | 385   | 395 | Deamidation (NQ)                       | N3:Deamidation (NQ):68.31                                                      | PEAKS DB  |
| R.AHVQ(+.98)VVDNSGNRVYDEELQEGHVLVVPQNFAVAGK.S         | N    | 49.13  | 3817.9023 | 35     | 0.9  | 955.4838  | 4 | 33.12 | 4        | F4:1624 | OB5942 H6 Ro.raw | 4.5408E4           | 1        | 1                      | 431   | 465 |                                        | Q4:Deamidation (NQ):25.58                                                      | PEAKS DB  |
| R.RFNLAGNHEQEFLR.Y                                    | N    | 45.43  | 1729.8647 | 14     | 0.9  | 577.6294  | 3 | 32.11 | 5        | F5:1568 | OB5943 H6 Ro.raw | 3.821E3            | 1        | 1                      | 196   | 209 |                                        |                                                                                | PEAKS DB  |
| K.FFVPPSQQSLGAV.A                                     | Y    | 44.36  | 1375.7135 | 13     | 9.3  | 688.8704  | 2 | 30.71 | 4        | F4:1587 | OB5942 H6 Ro.raw | 8.8364E4           | 1        | 1                      | 524   | 536 |                                        |                                                                                | PEAKS DB  |
| W.LGLSAEYGNLYR.N                                      | N    | 43.06  | 1354.6881 | 12     | 3.5  | 678.3537  | 2 | 31.68 | 4        | F4:1539 | OB5942 H6 Ro.raw | 0                  | 0        | 0                      | 397   | 408 |                                        |                                                                                | PEAKS DB  |
| N.G(+57.02)IEETIC(+57.02)TASVKK.N                     | N    | 42.25  | 1491.7603 | 13     | 8.7  | 746.8939  | 2 | 26.96 | 4        | F4:1261 | OB5942 H6 Ro.raw | 1.3952E4           | 2        | 2                      | 353   | 365 | Carbamidomethylation                   | G1:Carbamidomethylation (DHKE, X@N-term):32.28;C7:Carbamidomethylation:1000.00 | PEAKS PTM |
| R.AHVQVVDNS(+.98)GN(+.98)RVYDEELQEGHVLVVPQNFAVAGK.S   | N    | 41.04  | 3818.8862 | 35     | 8.6  | 955.7371  | 4 | 34.33 | 5        | F5:1692 | OB5943 H6 Ro.raw | 0                  | 0        | 0                      | 431   | 465 |                                        | N9:Deamidation (NQ):0.00;N11:Deamidation (NQ):0.00                             | PEAKS DB  |
| R.AHVQ(+.98)VVDNSGNRVYDEELQEGHVLVVPQ(+.98)NFAVAGK.S   | N    | 40.14  | 3818.8862 | 35     | 8.9  | 955.7373  | 4 | 33.12 | 4        | F4:1624 | OB5942 H6 Ro.raw | 3.8034E4           | 1        | 1                      | 431   | 465 |                                        | Q4:Deamidation (NQ):8.81;Q28:Deamidation (NQ):12.28                            | PEAKS DB  |
| R.LESEGGYIETWN(+.98)PNNQEFEC(+57.02)AGVALSR.L         | N    | 40.05  | 3070.3613 | 27     | 6.9  | 1536.1985 | 2 | 34.73 | 5        | F5:1729 | OB5943 H6 Ro.raw | 2.6575E4           | 1        | 1                      | 46    | 72  | Deamidation (NQ); Carbamidomethylation | N12:Deamidation (NQ):1000.00; C20:Carbamidomethylation:1000.00                 | PEAKS DB  |
| R.AHVQVVDNSGNRVYDEELQEGHVLVVPQNFAVAGK.S               | N    | 39.89  | 3816.9182 | 35     | -0.1 | 764.3909  | 5 | 33.91 | 5        | F5:1668 | OB5943 H6 Ro.raw | 0                  | 0        | 0                      | 431   | 465 |                                        |                                                                                | PEAKS DB  |
| R.W(+15.99)LGLSAEYGNLYR.N                             | N    | 37.59  | 1556.7623 | 13     | -0.8 | 779.3878  | 2 | 34.26 | 4        | F4:1698 | OB5942 H6 Ro.raw | 3.8864E3           | 1        | 1                      | 396   | 408 | Oxidation (HW)                         | W1:Oxidation (HW):1000.00                                                      | PEAKS PTM |
| R.AHVQVVDNS(+.98)GNRVYDEELQEGHVLVVPQNFAVAGK.S         | N    | 36.89  | 3817.9023 | 35     | 2.2  | 955.4850  | 4 | 33.52 | 5        | F5:1663 | OB5943 H6 Ro.raw | 4.5408E4           | 1        | 1                      | 431   | 465 |                                        | N9:Deamidation (NQ):9.40                                                       | PEAKS DB  |
| R.NALFVPH(+14.02)YNTNAHSIIYALR.G                      | N    | 36.41  | 2327.2175 | 20     | 2.7  | 776.7485  | 3 | 36.25 | 5        | F5:1805 | OB5943 H6 Ro.raw | 1.569E4            | 1        | 1                      | 409   | 428 |                                        | H7:Methylation (others):4.52                                                   | PEAKS PTM |
| R.LNAQRPDNRLESEGGYIETWNPNN(+.98)QEFC(+57.02)AGVALSR.L | N    | 36.07  | 4134.9087 | 36     | 4.7  | 1379.3167 | 3 | 33.85 | 6        | F6:1671 | OB5944 H6 Ro.raw | 8.0788E4           | 1        | 1                      | 37    | 72  | Deamidation (NQ); Carbamidomethylation | N24:Deamidation (NQ):1000.00; C29:Carbamidomethylation:1000.00                 | PEAKS DB  |
| R.GYFGLIFPGC(+58.01)PSTYEPAQQR.R                      | N    | 35.93  | 2474.1211 | 22     | 4.1  | 1238.0729 | 2 | 38.39 | 6        | F6:1932 | OB5944 H6 Ro.raw | 0                  | 0        | 0                      | 99    | 120 | Carboxymethyl                          | C10:Carboxymethyl:1000.00                                                      | PEAKS PTM |
| R.GYFGLIFPGC(+71.04)PSTYEPAQGRR.H                     | N    | 35.48  | 2643.2539 | 23     | 1.6  | 882.0933  | 3 | 34.83 | 4        | F4:1720 | OB5942 H6 Ro.raw | 3.8119E4           | 1        | 1                      | 99    | 121 | Propionamide                           | C10:Propionamide:1000.00                                                       | PEAKS PTM |

total 40 peptides

| Peptide                                    | Uniq | -10lgP | Mass      | Length | ppm | m/z      | z | RT    | Fraction | Scan    | Source File      | Area Roast Ara h 6 | #Feature | #Feature Roast Ara h 6 | Start | End | PTM                  | AScore                                                       | Found By  |
|--------------------------------------------|------|--------|-----------|--------|-----|----------|---|-------|----------|---------|------------------|--------------------|----------|------------------------|-------|-----|----------------------|--------------------------------------------------------------|-----------|
| R.GYFGLIFPGC(+57.02)PSTYEPAQQGR(+14.02)R.H | N    | 34.44  | 2643.2539 | 23     | 1.0 | 882.0928 | 3 | 35.30 | 5        | F5:1741 | OB5943 H6 Ro.raw | 3.3639E4           | 1        | 1                      | 99    | 121 | Carbamidomethylation | C10:Carbamido methylation:100 0.00;R22:Methyl ation(KR):0.00 | PEAKS PTM |
| total 40 peptides                          |      |        |           |        |     |          |   |       |          |         |                  |                    |          |                        |       |     |                      |                                                              |           |

Q647H4|Q647H4\_ARAHY

[back to list](#)

[| Protein Coverage](#) | [| Supporting Peptides](#) |

Protein Coverage:

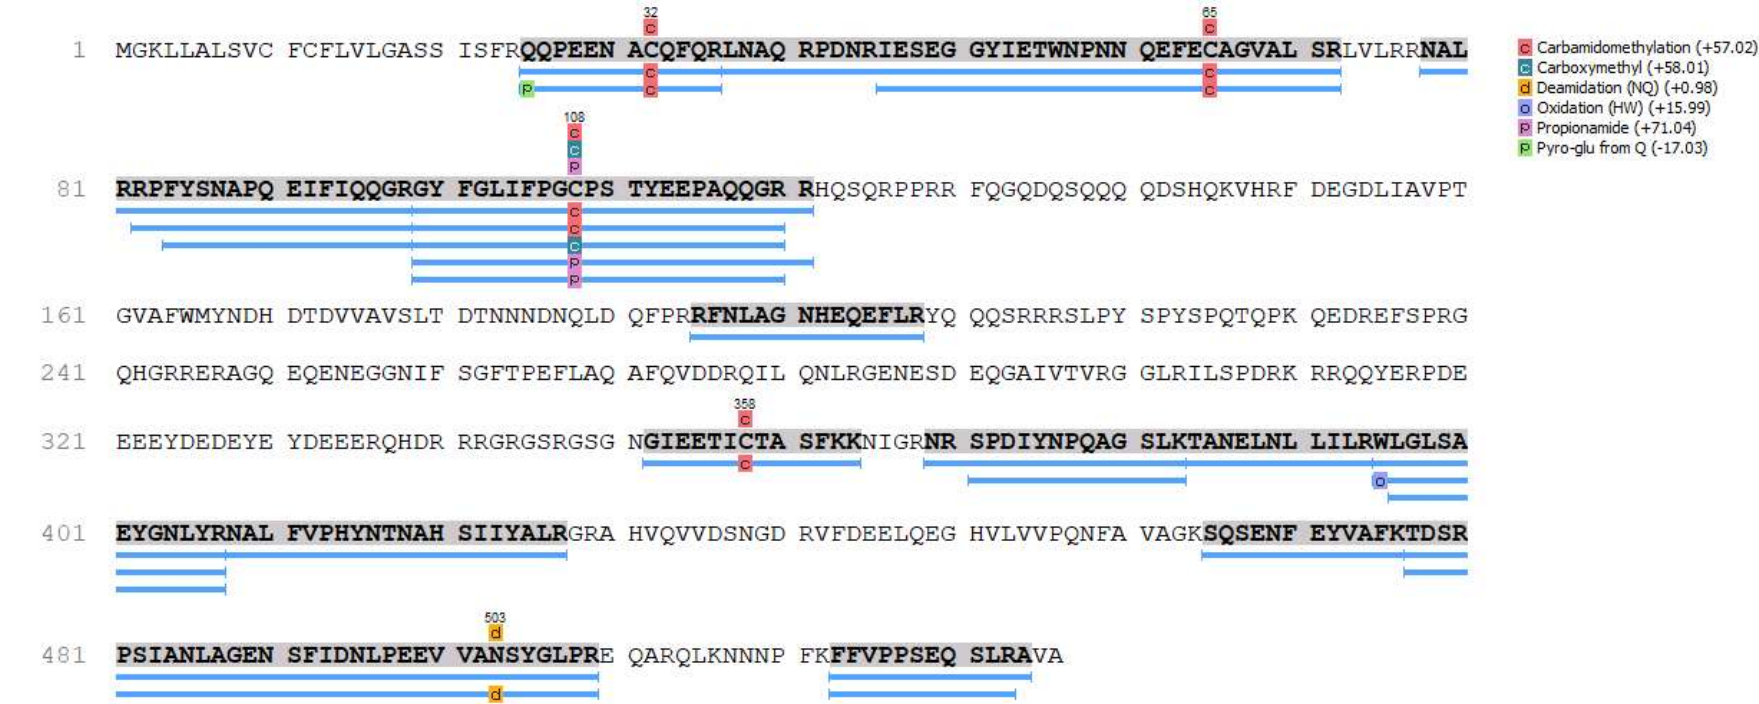

Supporting Peptides:

| Peptide                           | Uniq | -10lgP | Mass      | Length | ppm | m/z       | z | RT    | Fraction | Scan    | Source File      | Area Roast Ara h 6 | #Feature | #Feature Roast Ara h 6 | Start | End | PTM                  | AScore                             | Found By |
|-----------------------------------|------|--------|-----------|--------|-----|-----------|---|-------|----------|---------|------------------|--------------------|----------|------------------------|-------|-----|----------------------|------------------------------------|----------|
| R.GYFGLIFPGC(+57.02)PSTYEPAQQGR.R | N    | 142.29 | 2473.1372 | 22     | 1.5 | 1237.5778 | 2 | 36.17 | 4        | F4:1794 | OB5942 H6 Ro.raw | 1.0118E6           | 3        | 3                      | 99    | 120 | Carbamidomethylation | C10:Carbamido methylation:10 00,00 | PEAKS DB |
| R.WLGLSAEYGNLYR.N                 | N    | 136.28 | 1540.7673 | 13     | 2.0 | 771.3925  | 2 | 34.64 | 4        | F4:1712 | OB5942 H6 Ro.raw | 2.2268E6           | 6        | 6                      | 395   | 407 |                      |                                    | PEAKS DB |
| K.SQSENF EYVAFK.T                 | N    | 124.82 | 1447.6619 | 12     | 1.0 | 724.8389  | 2 | 31.74 | 5        | F5:1533 | OB5943 H6 Ro.raw | 9.8941E5           | 3        | 3                      | 465   | 476 |                      |                                    | PEAKS DB |

|                   |
|-------------------|
| total 33 peptides |
|-------------------|



| Peptide                                          | Uniq | -10lgP | Mass      | Length | ppm  | m/z       | z | RT    | Fraction | Scan    | Source File      | Area Roast Ara h 6 | #Feature | #Feature Roast Ara h 6 | Start | End | PTM                                   | AScore                                                     | Found By  |
|--------------------------------------------------|------|--------|-----------|--------|------|-----------|---|-------|----------|---------|------------------|--------------------|----------|------------------------|-------|-----|---------------------------------------|------------------------------------------------------------|-----------|
| R.RPFYSNAPQEIFIQQGR.G                            | N    | 119.86 | 2050,0383 | 17     | 2.0  | 684.3547  | 3 | 32.67 | 5        | F5:1597 | OB5943 H6 Ro.raw | 3.2279E6           | 6        | 6                      | 82    | 98  |                                       |                                                            | PEAKS DB  |
| R.NRSPDIYNPQAGSLK.T                              | N    | 114.42 | 1658,8376 | 15     | 0.1  | 830.4261  | 2 | 27.65 | 5        | F5:1291 | OB5943 H6 Ro.raw | 4.04E5             | 6        | 6                      | 369   | 383 |                                       |                                                            | PEAKS DB  |
| R.SPDINPQAGSLK.T                                 | N    | 102.05 | 1388,6936 | 13     | 0.9  | 695.3547  | 2 | 28.77 | 5        | F5:1355 | OB5943 H6 Ro.raw | 7.3513E5           | 3        | 3                      | 371   | 383 |                                       |                                                            | PEAKS DB  |
| K.TDSRPSIANLAGENSFIDNLPeeVVANSYGLPR.E            | N    | 101.93 | 3544,7434 | 33     | 3.9  | 1182.5930 | 3 | 37.73 | 6        | F6:1866 | OB5944 H6 Ro.raw | 1.0339E6           | 4        | 4                      | 477   | 509 |                                       |                                                            | PEAKS DB  |
| R.NALFVPHYNTNAHSIIYALR.G                         | N    | 97.15  | 2313,2019 | 20     | -0.1 | 772.0745  | 3 | 35.38 | 6        | F6:1747 | OB5944 H6 Ro.raw | 2.7972E6           | 8        | 8                      | 408   | 427 |                                       |                                                            | PEAKS DB  |
| R.GYFGLIFPGC(+71.04)PSTYEPAQQGR.R                | N    | 92.77  | 2487,1528 | 22     | 2.2  | 1244,5864 | 2 | 36.43 | 5        | F5:1817 | OB5943 H6 Ro.raw | 8.0086E4           | 3        | 3                      | 99    | 120 | Propionamide                          | C10:Propionamide:1000,00                                   | PEAKS PTM |
| R.Q(-17.03)QPEENAC(+57.02)QFQR.L                 | N    | 88.35  | 1516,6365 | 12     | 2.5  | 759.3274  | 2 | 28.03 | 5        | F5:1319 | OB5943 H6 Ro.raw | 7.279E3            | 2        | 2                      | 25    | 36  | Pyro-glu from Q; Carbamidomethylation | Q1:Pyro-glu from Q:1000,00;C8:Carbamidomethylation:1000,00 | PEAKS PTM |
| R.IESEGGYIETWNPNNQEFEC(+57.02)AGVALSR.L          | N    | 85.95  | 3069,3774 | 27     | 5.5  | 1024,1387 | 3 | 34.81 | 5        | F5:1720 | OB5943 H6 Ro.raw | 1.0361E4           | 1        | 1                      | 46    | 72  | Carbamidomethylation                  | C20:Carbamidomethylation:1000,00                           | PEAKS DB  |
| R.QQPEENAC(+57.02)QFQR.L                         | N    | 84.17  | 1533,6630 | 12     | 1.7  | 767,8400  | 2 | 25.24 | 5        | F5:1157 | OB5943 H6 Ro.raw | 3.7544E4           | 3        | 3                      | 25    | 36  | Carbamidomethylation                  | C8:Carbamidomethylation:1000,00                            | PEAKS DB  |
| K.FFVPPSEQSLR.A                                  | Y    | 82.19  | 1305,6716 | 11     | 3.4  | 653,8453  | 2 | 30.79 | 6        | F6:1485 | OB5944 H6 Ro.raw | 5.6571E3           | 1        | 1                      | 523   | 533 |                                       |                                                            | PEAKS DB  |
| K.TANELNLLILR.W                                  | N    | 81.05  | 1268,7452 | 11     | 0.9  | 635,3805  | 2 | 34.83 | 4        | F4:1715 | OB5942 H6 Ro.raw | 7.0668E5           | 3        | 3                      | 384   | 394 |                                       |                                                            | PEAKS DB  |
| P.FYSNAPQEIFIQQGR.G                              | N    | 76.66  | 1796,8845 | 15     | -1.2 | 899,4484  | 2 | 32.27 | 4        | F4:1574 | OB5942 H6 Ro.raw | 1.5688E3           | 1        | 1                      | 84    | 98  |                                       |                                                            | PEAKS DB  |
| N.GIEETIC(+57.02)TASFKK.N                        | Y    | 76.37  | 1482,7388 | 13     | -0.4 | 742,3763  | 2 | 29.14 | 5        | F5:1388 | OB5943 H6 Ro.raw | 5.037E4            | 3        | 3                      | 352   | 364 | Carbamidomethylation                  | C7:Carbamidomethylation:1000,00                            | PEAKS DB  |
| R.LNAQRPDNRIESEGGYIETWNPNNQEFEC(+57.02)AGVALSR.L | N    | 75.05  | 4133,9248 | 36     | 2.4  | 1034,4910 | 4 | 33.87 | 6        | F6:1670 | OB5944 H6 Ro.raw | 1.3368E6           | 1        | 1                      | 37    | 72  | Carbamidomethylation                  | C29:Carbamidomethylation:1000,00                           | PEAKS DB  |
| R.NALRRPFYSNAPQEIFIQQGR.G                        | N    | 74.35  | 2504,3037 | 21     | 0.3  | 627,0834  | 4 | 33.30 | 4        | F4:1641 | OB5942 H6 Ro.raw | 1.8121E5           | 4        | 4                      | 78    | 98  |                                       |                                                            | PEAKS DB  |
| R.GYFGLIFPGC(+57.02)PSTYEPAQQGR.H                | N    | 73.07  | 2629,2383 | 23     | 1.4  | 877,4213  | 3 | 35.30 | 5        | F5:1733 | OB5943 H6 Ro.raw | 1.2125E6           | 3        | 3                      | 99    | 121 | Carbamidomethylation                  | C10:Carbamidomethylation:1000,00                           | PEAKS DB  |
| R.IESEGGYIETWNPNNQ(+.98)EFEC(+57.02)AGVALSR.L    | N    | 62.09  | 3070,3613 | 27     | 6.0  | 1024,4672 | 3 | 34.92 | 5        | F5:1736 | OB5943 H6 Ro.raw | 6,6817E3           | 1        | 1                      | 46    | 72  | Carbamidomethylation                  | Q16:Deamidation (NQ):0.00;C20:Carbamidomethylation:1000,00 | PEAKS DB  |
| K.TDSRPSIANLAGENSFIDNLPeeVVAN(+.98)SYGLPR.E      | N    | 59.30  | 3545,7273 | 33     | 7.1  | 1182,9248 | 3 | 36.36 | 4        | F4:1812 | OB5942 H6 Ro.raw | 3,983E3            | 1        | 1                      | 477   | 509 | Deamidation (NQ)                      | N27:Deamidation (NQ):51.97                                 | PEAKS DB  |
| K.FFVPPSEQSLRA.V                                 | Y    | 56.98  | 1376,7087 | 12     | 0.2  | 689,3618  | 2 | 31.25 | 4        | F4:1517 | OB5942 H6 Ro.raw | 1,7396E5           | 4        | 4                      | 523   | 534 |                                       |                                                            | PEAKS DB  |

total 33 peptides

| Peptide                                                | Uniq | -10lgP | Mass      | Length | ppm  | m/z       | z | RT    | Fraction | Scan    | Source File      | Area Roast Ara h 6 | #Feature | #Feature Roast Ara h 6 | Start | End | PTM                  | AScore                                                     | Found By  |
|--------------------------------------------------------|------|--------|-----------|--------|------|-----------|---|-------|----------|---------|------------------|--------------------|----------|------------------------|-------|-----|----------------------|------------------------------------------------------------|-----------|
| R.RFNLAGNHEQEFLR.Y                                     | N    | 45.43  | 1729,8647 | 14     | 0.9  | 577.6294  | 3 | 32.11 | 5        | F5:1568 | OB5943 H6 Ro.raw | 3,821E3            | 1        | 1                      | 195   | 208 |                      |                                                            | PEAKS DB  |
| W.LGLSAEYGNLYR.N                                       | N    | 43.06  | 1354,6881 | 12     | 3.5  | 678.3537  | 2 | 31.68 | 4        | F4:1539 | OB5942 H6 Ro.raw | 0                  | 0        | 0                      | 396   | 407 |                      |                                                            | PEAKS DB  |
| R.IESEGGYIETWN(+.98)PNNQEFEC(+57.02)AGVALSR.L          | N    | 40.05  | 3070.3613 | 27     | 6.9  | 1536.1985 | 2 | 34.73 | 5        | F5:1729 | OB5943 H6 Ro.raw | 2.6575E4           | 1        | 1                      | 46    | 72  | Carbamidomethylation | N12:Deamidation (NQ):0.00;C20:Carbamidomethylation:1000.00 | PEAKS DB  |
| R.W(+15.99)LGLSAEYGNLYR.N                              | N    | 37.59  | 1556.7623 | 13     | -0.8 | 779.3878  | 2 | 34.26 | 4        | F4:1698 | OB5942 H6 Ro.raw | 3.8864E3           | 1        | 1                      | 395   | 407 | Oxidation (HW)       | W1:Oxidation (HW):1000,00                                  | PEAKS PTM |
| R.NALFVPH(+14.02)YNTNAHSIIYALR.G                       | N    | 36.41  | 2327.2175 | 20     | 2.7  | 776.7485  | 3 | 36.25 | 5        | F5:1805 | OB5943 H6 Ro.raw | 1.569E4            | 1        | 1                      | 408   | 427 |                      | H7:Methylation (others):4,52                               | PEAKS PTM |
| R.LNAQRPDNRIESEGGYIETWNPNN(+.98)QEFEC(+57.02)AGVALSR.L | N    | 36.07  | 4134,9087 | 36     | 4.7  | 1379.3167 | 3 | 33.85 | 6        | F6:1671 | OB5944 H6 Ro.raw | 8,0788E4           | 1        | 1                      | 37    | 72  | Carbamidomethylation | N24:Deamidation (NQ):0.00;C29:Carbamidomethylation:1000.00 | PEAKS DB  |
| R.GYFGLIFPGC(+58.01)PSTYEPAQQGR.R                      | N    | 35.93  | 2474,1211 | 22     | 4.1  | 1238.0729 | 2 | 38.39 | 6        | F6:1932 | OB5944 H6 Ro.raw | 0                  | 0        | 0                      | 99    | 120 | Carboxymethyl        | C10:Carboxymethyl:1000,00                                  | PEAKS PTM |
| R.GYFGLIFPGC(+71.04)PSTYEPAQQGRR.H                     | N    | 35.48  | 2643,2539 | 23     | 1.6  | 882.0933  | 3 | 34.83 | 4        | F4:1720 | OB5942 H6 Ro.raw | 3.8119E4           | 1        | 1                      | 99    | 121 | Propionamide         | C10:Propionamide:1000,00                                   | PEAKS PTM |
| R.GYFGLIFPGC(+57.02)PSTYEPAQQGR(+14.02)R.H             | N    | 34.44  | 2643,2539 | 23     | 1.0  | 882.0928  | 3 | 35.30 | 5        | F5:1741 | OB5943 H6 Ro.raw | 3.3639E4           | 1        | 1                      | 99    | 121 | Carbamidomethylation | C10:Carbamidomethylation:1000.00;R22:Methylation(KR):0.00  | PEAKS PTM |
| K.TDSRPSIANLAGENSFIDN(+.98)LPEEVVANSYGLPR.E            | N    | 33.13  | 3545,7273 | 33     | 3.8  | 1182.9209 | 3 | 39.27 | 5        | F5:1978 | OB5943 H6 Ro.raw | 0                  | 0        | 0                      | 477   | 509 |                      | N19:Deamidation (NQ):8,41                                  | PEAKS DB  |
| K.SQSE(+53.92)NFEYVAFK.T                               | N    | 32.70  | 1501,5812 | 12     | -0.3 | 751.7976  | 2 | 31.36 | 4        | F4:1520 | OB5942 H6 Ro.raw | 0                  | 0        | 0                      | 465   | 476 |                      | E4:Replacement of 2 protons by iron:22,45                  | PEAKS PTM |
| total 33 peptides                                      |      |        |           |        |      |           |   |       |          |         |                  |                    |          |                        |       |     |                      |                                                            |           |

A5Z1R0|A5Z1R0\_ARAHY

[back to list](#)

| [Protein Coverage](#) | [Supporting Peptides](#) |

Protein Coverage:



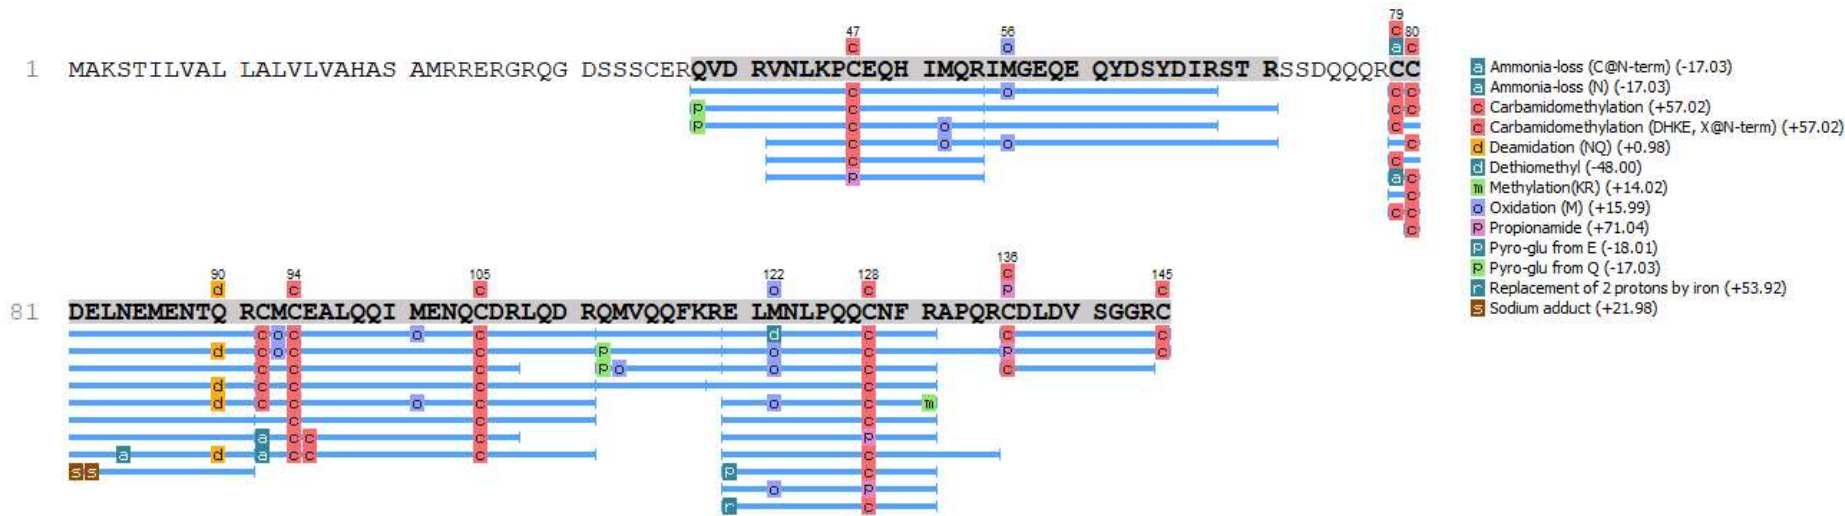

Supporting Peptides:

| Peptide                                      | Uniq | -10lgP | Mass      | Length | ppm | m/z       | z | RT    | Fraction | Scan    | Source File      | Area Roast Ara h 6 | #Feature | #Feature Roast Ara h 6 | Start | End | PTM                  | AScore                                                                                             | Found By  |
|----------------------------------------------|------|--------|-----------|--------|-----|-----------|---|-------|----------|---------|------------------|--------------------|----------|------------------------|-------|-----|----------------------|----------------------------------------------------------------------------------------------------|-----------|
| R.IMGEQEYDSYDIR,S                            | Y    | 124.33 | 1745.7566 | 14     | 3.3 | 873.8885  | 2 | 30.26 | 5        | F5:1465 | OB5943 H6 Ro.raw | 1.4138E7           | 6        | 6                      | 55    | 68  |                      |                                                                                                    | PEAKS DB  |
| R.ELMNLPPQC(+57.02)NFR,A                     | Y    | 121.41 | 1548.7177 | 12     | 2.6 | 775.3681  | 2 | 31.38 | 5        | F5:1532 | OB5943 H6 Ro.raw | 8.1025E6           | 8        | 8                      | 120   | 131 | Carbamidomethylation | C9:Carbamidomethylation:1000.00                                                                    | PEAKS DB  |
| R.I(+57.02)MGEQEYDSYDIR,S                    | Y    | 121.19 | 1802.7781 | 14     | 1.9 | 902.3981  | 2 | 30.45 | 5        | F5:1466 | OB5943 H6 Ro.raw | 1.078E5            | 3        | 3                      | 55    | 68  |                      | I1:Carbamidomethylation (DHKE, X@N-term):49.43                                                     | PEAKS PTM |
| R.IM(+15.99)GEQEYDSYDIR,S                    | Y    | 118.58 | 1761.7516 | 14     | 3.3 | 881.8860  | 2 | 28.96 | 5        | F5:1366 | OB5943 H6 Ro.raw | 2.9554E6           | 4        | 4                      | 55    | 68  | Oxidation (M)        | M2:Oxidation (M):1000.00                                                                           | PEAKS DB  |
| R.C(+57.02)MC(+57.02)EALQQIMENQC(+57.02)DR,L | Y    | 116.38 | 2084.8206 | 16     | 4.4 | 1043.4221 | 2 | 33.85 | 5        | F5:1665 | OB5943 H6 Ro.raw | 3.1431E4           | 2        | 2                      | 92    | 107 | Carbamidomethylation | C1:Carbamidomethylation:1000.00; C3:Carbamidomethylation:1000.00; C14:Carbamidomethylation:1000.00 | PEAKS DB  |

total 61 peptides

| Peptide                                          | Uniq | -10lgP | Mass      | Length | ppm | m/z      | z | RT    | Fraction | Scan    | Source File      | Area Roast Ara h 6 | #Feature | #Feature Roast Ara h 6 | Start | End | PTM                                    | AScore                                                                                             | Found By  |
|--------------------------------------------------|------|--------|-----------|--------|-----|----------|---|-------|----------|---------|------------------|--------------------|----------|------------------------|-------|-----|----------------------------------------|----------------------------------------------------------------------------------------------------|-----------|
| R.ELM(+15.99)NLPQQC(+57.02)NFR.A                 | Y    | 109.46 | 1564.7126 | 12     | 0.9 | 783.3643 | 2 | 29.14 | 5        | F5:1377 | OB5943 H6 Ro.raw | 9.4897E5           | 3        | 3                      | 120   | 131 | Oxidation (M); Carbamidomethylation    | M3:Oxidation (M):1000.00; C9:Carbamidomethylation:1000.00                                          | PEAKS DB  |
| R.C(+57.02)C(+57.02)DELNEMENTQR.C                | Y    | 102.36 | 1697.6444 | 13     | 0.6 | 849.8300 | 2 | 27.44 | 4        | F4:1278 | OB5942 H6 Ro.raw | 3.0478E5           | 3        | 3                      | 79    | 91  | Carbamidomethylation                   | C1:Carbamidomethylation:1000.00; C2:Carbamidomethylation:1000.00                                   | PEAKS DB  |
| R.C(+57.02)C(+57.02)DELNEMENTQ(+.98)R.C          | Y    | 100.88 | 1698.6284 | 13     | 1.6 | 850.3229 | 2 | 28.40 | 5        | F5:1344 | OB5943 H6 Ro.raw | 3.601E5            | 3        | 3                      | 79    | 91  | Carbamidomethylation; Deamidation (NQ) | C1:Carbamidomethylation:1000.00; C2:Carbamidomethylation:1000.00; Q12:Deamidation (NQ):60.92       | PEAKS DB  |
| R.C(+57.02)MC(+57.02)EALQQIMENQC(+57.02)DRLQDR.Q | Y    | 97.66  | 2597.0913 | 20     | 3.1 | 866.7070 | 3 | 33.49 | 4        | F4:1646 | OB5942 H6 Ro.raw | 2.7944E6           | 7        | 7                      | 92    | 111 | Carbamidomethylation                   | C1:Carbamidomethylation:1000.00; C3:Carbamidomethylation:1000.00; C14:Carbamidomethylation:1000.00 | PEAKS DB  |
| R.ELMNLPQQC(+71.04)NFR.A                         | Y    | 92.76  | 1562.7334 | 12     | 0.0 | 782.3740 | 2 | 31.56 | 5        | F5:1534 | OB5943 H6 Ro.raw | 2.0625E5           | 3        | 3                      | 120   | 131 | Propionamide                           | C9:Propionamide:1000.00                                                                            | PEAKS PTM |
| R.QVDRVNLKPC(+57.02)EQHIMQR.I                    | Y    | 91.79  | 2150.0837 | 17     | 0.0 | 538.5282 | 4 | 29.70 | 5        | F5:1432 | OB5943 H6 Ro.raw | 4.1805E5           | 4        | 4                      | 38    | 54  | Carbamidomethylation                   | C10:Carbamidomethylation:1000.00                                                                   | PEAKS DB  |
| R.Q(-17.03)VDRVNLKPC(+57.02)EQHIMQR.I            | Y    | 91.37  | 2133.0571 | 17     | 1.2 | 534.2722 | 4 | 30.44 | 5        | F5:1454 | OB5943 H6 Ro.raw | 8.5431E5           | 5        | 5                      | 38    | 54  | Pyro-glu from Q; Carbamidomethylation  | Q1:Pyro-glu from Q:1000.00; C10:Carbamidomethylation:1000.00                                       | PEAKS PTM |

total 61 peptides

| Peptide                                              | Uniq | -10lgP | Mass      | Length | ppm | m/z       | z | RT    | Fraction | Scan    | Source File      | Area Roast Ara h 6 | #Feature | #Feature Roast Ara h 6 | Start | End | PTM                                                                                  | AScore                                                                                                                                                                   | Found By  |
|------------------------------------------------------|------|--------|-----------|--------|-----|-----------|---|-------|----------|---------|------------------|--------------------|----------|------------------------|-------|-----|--------------------------------------------------------------------------------------|--------------------------------------------------------------------------------------------------------------------------------------------------------------------------|-----------|
| R.C(+71.04)C(+57.02)DELNEMENTQ(+.98)R.C              | Y    | 91.34  | 1712.6440 | 13     | 1.5 | 857.3306  | 2 | 28.58 | 5        | F5:1345 | OB5943 H6 Ro.raw | 2.2455E5           | 2        | 2                      | 79    | 91  | Carbamidomethylation; Deamidation (NQ)                                               | C1:Pro pionami de:14.0 2;C2:Carbami domethyl ation:1000.0 0;Q12: Deamid ation (NQ):6 7.96                                                                                | PEAKS PTM |
| R.VNLKPC(+57.02)EQHIMQR.I                            | Y    | 89.73  | 1651.8286 | 13     | 0.5 | 551.6171  | 3 | 28.40 | 5        | F5:1356 | OB5943 H6 Ro.raw | 1.1244E6           | 6        | 6                      | 42    | 54  | Carbamidomethylation                                                                 | C6:Car bamido methyl ation:1 000.00                                                                                                                                      | PEAKS DB  |
| R.C(-17.03)C(+57.02)D(+57.02)ELNEMENTQR.C            | Y    | 88.83  | 1680.6178 | 13     | 1.0 | 841.3170  | 2 | 32.29 | 5        | F5:1575 | OB5943 H6 Ro.raw | 3.9042E4           | 2        | 2                      | 79    | 91  | Ammonia-loss (C@N-term); Carbamidomethylation                                        | C1:Am monia-l oss (C @N-ter m):100 0.00;C 2:Carb amido methyl ation:1 000.00; D3:Car bamido methyl ation (DHKE, X@N-te rm):33. 98                                        | PEAKS PTM |
| R.C(-17.03)MC(+57.02)E(+57.02)ALQQIMENQC(+57.02)DR.L | Y    | 87.36  | 2067.7942 | 16     | 3.0 | 1034.9075 | 2 | 38.83 | 5        | F5:1953 | OB5943 H6 Ro.raw | 2.7406E4           | 2        | 2                      | 92    | 107 | Ammonia-loss (C@N-term); Carbamidomethylation; Carbamidomethylation (DHKE, X@N-term) | C1:Am monia-l oss (C @N-ter m):100 0.00;C 3:Carb amido methyl ation:1 000.00; E4:Car bamido methyl ation (DHKE, X@N-te rm):15 1.49;C 14:Car bamido methyl ation:1 000.00 | PEAKS PTM |

total 61 peptides

| Peptide                                          | Uniq | -10lgP | Mass      | Length | ppm  | m/z      | z | RT    | Fraction | Scan    | Source File      | Area Roast Ara h 6 | #Feature | #Feature Roast Ara h 6 | Start | End | PTM                                | AScore                                                                                   | Found By  |
|--------------------------------------------------|------|--------|-----------|--------|------|----------|---|-------|----------|---------|------------------|--------------------|----------|------------------------|-------|-----|------------------------------------|------------------------------------------------------------------------------------------|-----------|
| R.C(+57.02)C(+71.04)DELNEMENTQR.C                | Y    | 86.36  | 1711.6600 | 13     | 1.0  | 856.8381 | 2 | 27.64 | 4        | F4:1283 | OB5942 H6 Ro.raw | 2.8007E5           | 3        | 3                      | 79    | 91  | Carbamidomethylation               | C1:Carbamido methylation:1000.00; C2:Propionamide:10.11                                  | PEAKS PTM |
| R.Q(-17.03)MVQQFKR.E                             | Y    | 84.77  | 1046.5331 | 8      | 0.0  | 524.2738 | 2 | 27.84 | 5        | F5:1322 | OB5943 H6 Ro.raw | 3.5192E5           | 3        | 3                      | 112   | 119 | Pyro-glu from Q                    | Q1:Pyro-glu from Q:1000.00                                                               | PEAKS PTM |
| R.C(+57.02)DLDVSGGRC(+57.02)                     | Y    | 83.20  | 1137.4543 | 10     | -0.5 | 569.7342 | 2 | 25.28 | 5        | F5:1158 | OB5943 H6 Ro.raw | 4.867E4            | 3        | 3                      | 136   | 145 | Carbamidomethylation               | C1:Carbamido methylation:1000.00; C10:Carbamidomethylation:1000.00                       | PEAKS DB  |
| R.C(+57.02)(+28.03)C(+57.02)DELNEMENTQR.C        | Y    | 82.43  | 1725.6757 | 13     | 1.0  | 863.8460 | 2 | 28.03 | 5        | F5:1316 | OB5943 H6 Ro.raw | 1.6949E4           | 1        | 1                      | 79    | 91  | Carbamidomethylation               | C1:Carbamido methylation:1000.00; C1:Ethylation:18.53; C2:Carbamido methylation:1000.00  | PEAKS PTM |
| R.C(+71.04)DLDVSGGRC(+57.02)                     | Y    | 81.95  | 1151.4700 | 10     | 0.9  | 576.7428 | 2 | 25.64 | 5        | F5:1183 | OB5943 H6 Ro.raw | 1.3899E4           | 3        | 3                      | 136   | 145 | Propionamide; Carbamidomethylation | C1:Propionamide:156.52; C10:Carbamido methylation:1000.00                                | PEAKS PTM |
| R.C(+71.04)MC(+57.02)EALQQIMENQC(+57.02)DRLQDR.Q | Y    | 81.33  | 2611.1069 | 20     | 1.1  | 871.3772 | 3 | 33.49 | 4        | F4:1647 | OB5942 H6 Ro.raw | 6.2487E5           | 2        | 2                      | 92    | 111 | Carbamidomethylation               | C1:Propionamide:20.41; C3:Carbamidomethylation:1000.00; C14:Carbamidomethylation:1000.00 | PEAKS PTM |

total 61 peptides

| Peptide                                                  | Uniq | -10lgP | Mass      | Length | ppm  | m/z      | z | RT    | Fraction | Scan    | Source File      | Area Roast Ara h 6 | #Feature | #Feature Roast Ara h 6 | Start | End | PTM                                 | AScore                                                                                                                     | Found By  |
|----------------------------------------------------------|------|--------|-----------|--------|------|----------|---|-------|----------|---------|------------------|--------------------|----------|------------------------|-------|-----|-------------------------------------|----------------------------------------------------------------------------------------------------------------------------|-----------|
| R.C(+57.02)M(+15.99)C(+57.02)EALQQIMENQC(+57.02)DRLQDR.Q | Y    | 72.82  | 2613.0862 | 20     | 1.4  | 872.0372 | 3 | 31.19 | 5        | F5:1576 | OB5943 H6 Ro.raw | 5.7636E5           | 5        | 5                      | 92    | 111 | Carbamidomethylation; Oxidation (M) | C1:Carbamidomethylation:1000.00; M2:Oxidation (M):89.48; C3:Carbamidomethylation:1000.00; C14:Carbamidomethylation:1000.00 | PEAKS DB  |
| R.ELM(-48.00)NLPQQC(+57.02)NFR.A                         | Y    | 71.71  | 1500.7144 | 12     | -0.1 | 501.2454 | 3 | 27.84 | 5        | F5:1311 | OB5943 H6 Ro.raw | 2.9967E5           | 2        | 2                      | 120   | 131 | Dethiomethyl; Carbamidomethylation  | M3:Dethiomethyl:1000.00; C9:Carbamidomethylation:1000.00                                                                   | PEAKS PTM |
| R.C(+57.02)DLDVSGGR.C                                    | Y    | 64.95  | 977.4236  | 9      | -0.5 | 489.7189 | 2 | 24.23 | 6        | F6:1121 | OB5944 H6 Ro.raw | 8.8623E2           | 1        | 1                      | 136   | 144 | Carbamidomethylation                | C1:Carbamidomethylation:1000.00                                                                                            | PEAKS DB  |
| R.C(+71.04)C(+57.02)DELNEMENTQR.C                        | Y    | 63.78  | 1711.6600 | 13     | 1.0  | 856.8381 | 2 | 27.64 | 4        | F4:1317 | OB5942 H6 Ro.raw | 1.8297E5           | 2        | 2                      | 79    | 91  | Carbamidomethylation                | C1:Propionamide:8.69; C2:Carbamidomethylation:1000.00                                                                      | PEAKS PTM |
| R.C(+57.02)(+28.03)C(+57.02)DELNEMENTQ(+.98)R.C          | Y    | 63.72  | 1726.6597 | 13     | 9.5  | 864.3453 | 2 | 28.38 | 4        | F4:1339 | OB5942 H6 Ro.raw | 2.3202E3           | 1        | 1                      | 79    | 91  | Carbamidomethylation                | C1:Carbamidomethylation:1000.00; C1:Ethylation:22.85; C2:Carbamidomethylation:1000.00; Q12:Deamidation (NQ):20.63          | PEAKS PTM |
| R.ELMNLPQQC(+57.02)NF(+31.99)R.A                         | Y    | 63.29  | 1580.7075 | 12     | -9.5 | 791.3535 | 2 | 31.67 | 4        | F4:1538 | OB5942 H6 Ro.raw | 0                  | 0        | 0                      | 120   | 131 | Carbamidomethylation                | C9:Carbamidomethylation:1000.00; F11:Dihydroxy:0.00                                                                        | PEAKS PTM |

total 61 peptides

| Peptide                                 | Uniq | -10lgP | Mass      | Length | ppm  | m/z      | z | RT    | Fraction | Scan    | Source File      | Area Roast Ara h 6 | #Feature | #Feature Roast Ara h 6 | Start | End | PTM                                    | AScore                                                                                                  | Found By  |
|-----------------------------------------|------|--------|-----------|--------|------|----------|---|-------|----------|---------|------------------|--------------------|----------|------------------------|-------|-----|----------------------------------------|---------------------------------------------------------------------------------------------------------|-----------|
| R.IM(+15.99)GE(+57.02)QEYDSYDIR.S       | Y    | 61.28  | 1818.7729 | 14     | 0.3  | 910.3940 | 2 | 29.25 | 5        | F5:1394 | OB5943 H6 Ro.raw | 2.5217E3           | 1        | 1                      | 55    | 68  | Oxidation (M)                          | M2:Oxidation (M):1000.00;E4:Carbamido methylation (DHKE, X@N-term):0.00                                 | PEAKS PTM |
| R.ELMNLPPQC(+57.02)N(+.98)FRAPQR.C      | Y    | 60.15  | 2001.9513 | 16     | 1.0  | 668.3250 | 3 | 30.88 | 5        | F5:1490 | OB5943 H6 Ro.raw | 0                  | 0        | 0                      | 120   | 135 | Carbamidomethylation                   | C9:Carbamido methylation:1000.00;N10:Deamidation (NQ):24.24                                             | PEAKS DB  |
| R.C(+57.02)C(+71.04)DELNEMENTQ(+.98)R.C | Y    | 60.08  | 1712.6440 | 13     | -0.7 | 857.3287 | 2 | 28.30 | 6        | F6:1333 | OB5944 H6 Ro.raw | 1.8621E5           | 2        | 2                      | 79    | 91  | Carbamidomethylation; Deamidation (NQ) | C1:Carbamido methylation:1000.00;C2:Propionamide:0.00;Q12:Deamidation (NQ):55.92                        | PEAKS PTM |
| R.VNLK(+41.03)PC(+57.02)EQHIMQR.I       | Y    | 59.14  | 1692.8552 | 13     | 3.3  | 565.2942 | 3 | 29.51 | 5        | F5:1408 | OB5943 H6 Ro.raw | 4.1722E3           | 1        | 1                      | 42    | 54  | Carbamidomethylation                   | K4:Amidation of lysines or N-terminal amines with methyl acetate:38.16;C6:Carbamido methylation:1000.00 | PEAKS PTM |
| R.ELM(+15.99)NLPQQC(+71.04)NFR.A        | Y    | 59.00  | 1578.7283 | 12     | 1.8  | 790.3729 | 2 | 29.10 | 6        | F6:1390 | OB5944 H6 Ro.raw | 0                  | 0        | 0                      | 120   | 131 | Oxidation (M); Propionamide            | M3:Oxidation (M):1000.00;C9:Propionamide:1000.00                                                        | PEAKS PTM |
| R.IMGEQEYDSYDIRSTR.S                    | Y    | 56.36  | 2089.9375 | 17     | 2.0  | 697.6545 | 3 | 28.94 | 4        | F4:1381 | OB5942 H6 Ro.raw | 7.2826E4           | 3        | 3                      | 55    | 71  |                                        |                                                                                                         | PEAKS DB  |

total 61 peptides

| Peptide                                                          | Uniq | -10lgP | Mass      | Length | ppm  | m/z      | z | RT    | Fraction | Scan    | Source File      | Area Roast Ara h 6 | #Feature | #Feature Roast Ara h 6 | Start | End | PTM                                 | AScore                                                                                                                                                         | Found By  |
|------------------------------------------------------------------|------|--------|-----------|--------|------|----------|---|-------|----------|---------|------------------|--------------------|----------|------------------------|-------|-----|-------------------------------------|----------------------------------------------------------------------------------------------------------------------------------------------------------------|-----------|
| R.C(+57.02)C(+57.02)DELN(+.98)EMENTQR.C                          | Y    | 52.99  | 1698.6284 | 13     | -1.6 | 850.3201 | 2 | 29.09 | 4        | F4:1387 | OB5942 H6 Ro.raw | 0                  | 0        | 0                      | 79    | 91  | Carbamidomethylation                | C1:Carbamido methylation:1 000.00; C2:Carbamido methylation:1 000.00; N6:Deamidation (NQ):31.56                                                                | PEAKS DB  |
| R.VNLKPC(+57.02)EQHIM(+15.99)QR.I                                | Y    | 52.99  | 1667.8236 | 13     | 0.6  | 556.9488 | 3 | 26.91 | 4        | F4:1258 | OB5942 H6 Ro.raw | 2.1143E4           | 1        | 1                      | 42    | 54  | Carbamidomethylation; Oxidation (M) | C6:Carbamido methylation:1 000.00; M11:Oxidation (M):10 00.00                                                                                                  | PEAKS DB  |
| R.VNLKPC(+71.04)EQHIMQR.I                                        | Y    | 52.61  | 1665.8444 | 13     | -0.4 | 556.2885 | 3 | 28.77 | 5        | F5:1372 | OB5943 H6 Ro.raw | 2.0373E4           | 1        | 1                      | 42    | 54  | Propionamide                        | C6:Propionamide:100 0.00                                                                                                                                       | PEAKS PTM |
| R.QMVQQFK.R                                                      | Y    | 51.26  | 907.4586  | 7      | -0.6 | 454.7363 | 2 | 25.61 | 6        | F6:1183 | OB5944 H6 Ro.raw | 8.0264E3           | 2        | 2                      | 112   | 118 |                                     |                                                                                                                                                                | PEAKS DB  |
| R.C(+57.02)M(+15.99)C(+57.02)EALQQIM(+15.99)ENQC(+57.02)DRLQDR.Q | Y    | 49.37  | 2629.0811 | 20     | 2.0  | 877.3694 | 3 | 29.88 | 5        | F5:1425 | OB5943 H6 Ro.raw | 7.9642E3           | 1        | 1                      | 92    | 111 | Carbamidomethylation; Oxidation (M) | C1:Carbamido methylation:1 000.00; M2:Oxidation (M):10 00.00; C3:Carbamido methylation:1 000.00; M10:Oxidation (M):10 00.00; C14:Carbamidomethylation:1 000.00 | PEAKS DB  |
| R.IMGEQE(+53.92)QYDSYDIR.S                                       | Y    | 48.83  | 1799.6759 | 14     | -2.3 | 600.8979 | 3 | 30.20 | 5        | F5:1450 | OB5943 H6 Ro.raw | 0                  | 0        | 0                      | 55    | 68  |                                     | E6:Replacement of 2 protons by iron:22.85                                                                                                                      | PEAKS PTM |
| R.ELMNLPPQC(+57.02)NFRAPQR.C                                     | Y    | 48.77  | 2000.9673 | 16     | 0.9  | 667.9969 | 3 | 30.26 | 5        | F5:1456 | OB5943 H6 Ro.raw | 6.8362E4           | 3        | 3                      | 120   | 135 | Carbamidomethylation                | C9:Carbamido methylation:1 000.00                                                                                                                              | PEAKS DB  |

total 61 peptides



| Peptide                                 | Uniq | -10lgP | Mass      | Length | ppm  | m/z      | z | RT    | Fraction | Scan    | Source File      | Area Roast Ara h 6 | #Feature | #Feature Roast Ara h 6 | Start | End | PTM                            | AScore                                                                           | Found By  |
|-----------------------------------------|------|--------|-----------|--------|------|----------|---|-------|----------|---------|------------------|--------------------|----------|------------------------|-------|-----|--------------------------------|----------------------------------------------------------------------------------|-----------|
| R,Q(-17.03)M(+15.99)VQQFKR,E            | Y    | 48.54  | 1062.5281 | 8      | 3.0  | 532.2729 | 2 | 25.67 | 5        | F5:1189 | OB5943 H6 Ro.raw | 0                  | 0        | 0                      | 112   | 119 | Pyro-glu from Q; Oxidation (M) | Q1:Pyro-glu from Q:1000.00; M2:Oxidation (M):1000.00                             | PEAKS PTM |
| R.IMGE(+17.03)QEQYDSYDIR,S              | Y    | 48.35  | 1762.7832 | 14     | -4.0 | 882.3953 | 2 | 30.83 | 4        | F4:1488 | OB5942 H6 Ro.raw | 0                  | 0        | 0                      | 55    | 68  |                                | E4:Replacement of proton with ammonium ion:18.53                                 | PEAKS PTM |
| K.RELMNLPQQC(+57.02)NFR,A               | Y    | 48.08  | 1704.8188 | 13     | 0.8  | 569.2807 | 3 | 29.89 | 4        | F4:1434 | OB5942 H6 Ro.raw | 0                  | 0        | 0                      | 119   | 131 | Carbamidomethylation           | C10:Carbamidomethylation:1000.00                                                 | PEAKS DB  |
| R,C(+71.04)C(+57.02)DELNEMEN(+.98)TQR,C | Y    | 47.24  | 1712.6440 | 13     | -0.7 | 857.3287 | 2 | 28.30 | 6        | F6:1367 | OB5944 H6 Ro.raw | 9.9111E4           | 1        | 1                      | 79    | 91  | Carbamidomethylation           | C1:Protonamide:0.00; C2:Carbamidomethylation:1000.00; N10:Deamidation (NQ):40.21 | PEAKS PTM |
| R.IM(+15.99)GEQEQYDSYDIRSTR,S           | Y    | 47.11  | 2105.9324 | 17     | -1.9 | 702.9834 | 3 | 27.45 | 4        | F4:1288 | OB5942 H6 Ro.raw | 2.3858E3           | 1        | 1                      | 55    | 71  | Oxidation (M)                  | M2:Oxidation (M):1000.00                                                         | PEAKS DB  |
| R.IMGEQEQY(-18.01)DSYDIR,S              | Y    | 46.28  | 1727.7461 | 14     | 3.4  | 864.8833 | 2 | 30.78 | 5        | F5:1484 | OB5943 H6 Ro.raw | 0                  | 0        | 0                      | 55    | 68  |                                | Y8:Dehydration:0.00                                                              | PEAKS PTM |
| R.IMGEQEQY(+125.90)DSYDIR,S             | Y    | 43.24  | 1871.6533 | 14     | 2.0  | 936.8358 | 2 | 32.29 | 5        | F5:1560 | OB5943 H6 Ro.raw | 6.88E3             | 1        | 1                      | 55    | 68  |                                | Y8:Iodination:41.59                                                              | PEAKS PTM |
| R.I(+57.02)M(+15.99)GEQEQYDSYDIR,S      | Y    | 42.43  | 1818.7729 | 14     | 0.8  | 910.3945 | 2 | 28.84 | 4        | F4:1372 | OB5942 H6 Ro.raw | 0                  | 0        | 0                      | 55    | 68  | Oxidation (M)                  | I1:Carbamidomethylation (DHKE, X@N-term):17.32; M2:Oxidation (M):1000.00         | PEAKS PTM |

total 61 peptides

| Peptide                                                  | Uniq | -10lgP | Mass      | Length | ppm  | m/z      | z | RT    | Fraction | Scan    | Source File      | Area Roast Ara h 6 | #Feature | #Feature Roast Ara h 6 | Start | End | PTM                                                                                  | AScore                                                                                                                                                   | Found By  |
|----------------------------------------------------------|------|--------|-----------|--------|------|----------|---|-------|----------|---------|------------------|--------------------|----------|------------------------|-------|-----|--------------------------------------------------------------------------------------|----------------------------------------------------------------------------------------------------------------------------------------------------------|-----------|
| R.C(+57.02)C(+57.02)DELN(-17.03)EMENTQ(+.98)R.C          | Y    | 42.31  | 1681.6018 | 13     | 0.9  | 841.8090 | 2 | 32.39 | 6        | F6:1584 | OB5944 H6 Ro.raw | 0                  | 0        | 0                      | 79    | 91  | Carbamidomethylation; Ammonia-loss (N); Deamidation (NQ)                             | C1:Carbamido methylation:1000.00; C2:Carbamido methylation:1000.00; N6:Ammonia-loss (N):105.60; Q12:Deamidation (NQ):55.92                               | PEAKS PTM |
| R.C(-17.03)MC(+57.02)E(+57.02)ALQQIMENQC(+57.02)DRLQDR.Q | Y    | 42.03  | 2580.0647 | 20     | 2.2  | 861.0307 | 3 | 37.62 | 5        | F5:1929 | OB5943 H6 Ro.raw | 1.6912E5           | 1        | 1                      | 92    | 111 | Ammonia-loss (C@N-term); Carbamidomethylation; Carbamidomethylation (DHKE, X@N-term) | C1:Ammonia-loss (C@N-term):1000.00; C3:Carbamido methylation:1000.00; E4:Carbamido methylation (DHKE, X@N-term):79.54; C14:Carbamido methylation:1000.00 | PEAKS PTM |
| R.C(+71.04)C(+57.02)DELN(+.98)EMENTQR.C                  | Y    | 40.31  | 1712.6440 | 13     | -0.7 | 857.3287 | 2 | 28.30 | 6        | F6:1382 | OB5944 H6 Ro.raw | 9.9111E4           | 1        | 1                      | 79    | 91  | Carbamidomethylation                                                                 | C1:Propionamide:0.00; C2:Carbamidomethylation:1000.00; N6:Deamidation (NQ):0.00                                                                          | PEAKS PTM |
| R.QMVQQFKR.E                                             | Y    | 39.82  | 1063.5597 | 8      | 0.9  | 532.7876 | 2 | 26.84 | 5        | F5:1239 | OB5943 H6 Ro.raw | 1.9987E4           | 2        | 2                      | 112   | 119 |                                                                                      |                                                                                                                                                          | PEAKS DB  |
| R.E(+53.92)LMNLPQQC(+57.02)NFR.A                         | Y    | 39.79  | 1602.6370 | 12     | -0.1 | 802.3257 | 2 | 31.08 | 4        | F4:1503 | OB5942 H6 Ro.raw | 0                  | 0        | 0                      | 120   | 131 | Replacement of 2 protons by iron; Carbamidomethylation                               | E1:Replacement of 2 protons by iron:76.82; C9:Carbamido methylation:1000.00                                                                              | PEAKS PTM |
| total 61 peptides                                        |      |        |           |        |      |          |   |       |          |         |                  |                    |          |                        |       |     |                                                                                      |                                                                                                                                                          |           |

| Peptide                                                          | Uniq | -10lgP | Mass      | Length | ppm | m/z      | z | RT    | Fraction | Scan    | Source File      | Area Roast Ara h 6 | #Feature | #Feature Roast Ara h 6 | Start | End | PTM                                                  | AScore                                                                                                                                             | Found By  |
|------------------------------------------------------------------|------|--------|-----------|--------|-----|----------|---|-------|----------|---------|------------------|--------------------|----------|------------------------|-------|-----|------------------------------------------------------|----------------------------------------------------------------------------------------------------------------------------------------------------|-----------|
| C.C(+57.02)D(+21.98)E(+21.98)LNEMENTQR,C                         | Y    | 39.39  | 1581.5776 | 12     | 6.2 | 791.8010 | 2 | 29.69 | 5        | F5:1412 | OB5943 H6 Ro.raw | 7.5318E3           | 1        | 1                      | 80    | 91  | Carbamidomethylation; Sodium adduct                  | C1:Carbamidomethylation:1000.00; D2:Sodium adduct:68.53; E3:Sodium adduct:69.29                                                                    | PEAKS PTM |
| R.E(-18.01)LMNLPQQC(+57.02)NFR.A                                 | Y    | 38.68  | 1530.7072 | 12     | 1.3 | 766.3618 | 2 | 34.58 | 4        | F4:1708 | OB5942 H6 Ro.raw | 7.6045E3           | 1        | 1                      | 120   | 131 | Pyro-glu from E; Carbamidomethylation                | E1:Pyro-glu from E:1000.00; C9:Carbamidomethylation:1000.00                                                                                        | PEAKS PTM |
| R.ELM(+15.99)NLPQQC(+57.02)NFR(+14.02).A                         | Y    | 35.11  | 1578.7283 | 12     | 0.4 | 790.3718 | 2 | 29.32 | 5        | F5:1402 | OB5943 H6 Ro.raw | 9.8676E3           | 1        | 1                      | 120   | 131 | Oxidation (M); Carbamidomethylation; Methylation(KR) | M3:Oxidation (M):1000.00; C9:Carbamidomethylation:1000.00; R12:Methylation(KR):1000.00                                                             | PEAKS PTM |
| R.C(+57.02)MC(+57.02)EALQQIM(+15.99)ENQC(+57.02)D(-18.01)RLQDR.Q | Y    | 34.82  | 2595.0757 | 20     | 1.8 | 866.0341 | 3 | 33.29 | 4        | F4:1627 | OB5942 H6 Ro.raw | 2.8862E4           | 1        | 1                      | 92    | 111 | Carbamidomethylation; Oxidation (M)                  | C1:Carbamidomethylation:1000.00; C3:Carbamidomethylation:1000.00; M10:Oxidation (M):73.05; C14:Carbamidomethylation:1000.00; D15:Dehydration:14.19 | PEAKS PTM |
| R.ELM(+15.99)NLPQQC(+57.02)NFRAPQR.C                             | Y    | 33.01  | 2016.9622 | 16     | 2.0 | 673.3293 | 3 | 28.58 | 5        | F5:1359 | OB5943 H6 Ro.raw | 7.79E3             | 1        | 1                      | 120   | 135 | Oxidation (M); Carbamidomethylation                  | M3:Oxidation (M):1000.00; C9:Carbamidomethylation:1000.00                                                                                          | PEAKS DB  |

total 61 peptides

| Peptide                                       | Uniq | -10lgP | Mass      | Length | ppm  | m/z      | z | RT    | Fraction | Scan    | Source File      | Area Roast Ara h 6 | #Feature | #Feature Roast Ara h 6 | Start | End | PTM                                                  | AScore                                                                                  | Found By  |
|-----------------------------------------------|------|--------|-----------|--------|------|----------|---|-------|----------|---------|------------------|--------------------|----------|------------------------|-------|-----|------------------------------------------------------|-----------------------------------------------------------------------------------------|-----------|
| R.IMGE(+21.98)QEYDSYDIR.S                     | Y    | 32.81  | 1767.7385 | 14     | -1.3 | 884.8754 | 2 | 29.94 | 4        | F4:1442 | OB5942 H6 Ro.raw | 1.7258E4           | 1        | 1                      | 55    | 68  |                                                      | E4:Sodium adduct:0.00                                                                   | PEAKS PTM |
| R.Q(-17.03)VDRVNLKPC(+57.02)EQHIM(+15.99)QR.I | Y    | 30.83  | 2149.0520 | 17     | 1.1  | 538.2709 | 4 | 28.97 | 4        | F4:1380 | OB5942 H6 Ro.raw | 0                  | 0        | 0                      | 38    | 54  | Pyro-glu from Q; Carbamidomethylation; Oxidation (M) | Q1:Pyro-glu from Q:1000.00; C10:Carbamidomethylation:1000.00; M15:Oxidation (M):1000.00 | PEAKS PTM |

total 61 peptides

sp|Q647G9|CONG\_ARAHY

[back to list](#)

[Protein Coverage](#) | [Supporting Peptides](#) |

Protein Coverage:

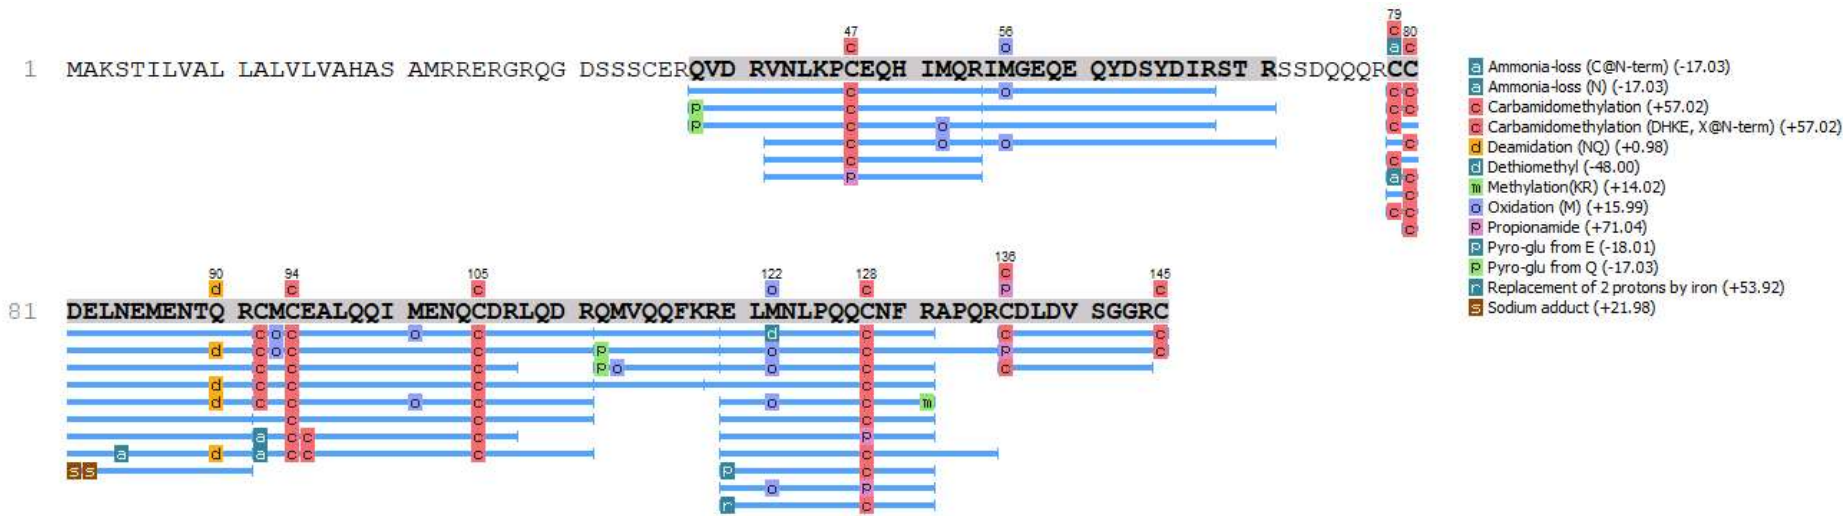

Supporting Peptides:

| Peptide                  | Uniq | -10lgP | Mass      | Length | ppm | m/z      | z | RT    | Fraction | Scan    | Source File      | Area Roast Ara h 6 | #Feature | #Feature Roast Ara h 6 | Start | End | PTM                  | AScore                          | Found By |
|--------------------------|------|--------|-----------|--------|-----|----------|---|-------|----------|---------|------------------|--------------------|----------|------------------------|-------|-----|----------------------|---------------------------------|----------|
| R.IMGEQEYDSYDIR.S        | Y    | 124.33 | 1745.7566 | 14     | 3.3 | 873.8885 | 2 | 30.26 | 5        | F5:1465 | OB5943 H6 Ro.raw | 1.4138E7           | 6        | 6                      | 55    | 68  |                      |                                 | PEAKS DB |
| R.ELMNLPQQC(+57.02)NFR.A | Y    | 121.41 | 1548.7177 | 12     | 2.6 | 775.3681 | 2 | 31.38 | 5        | F5:1532 | OB5943 H6 Ro.raw | 8.1025E6           | 8        | 8                      | 120   | 131 | Carbamidomethylation | C9:Carbamidomethylation:1000.00 | PEAKS DB |

total 61 peptides

| Peptide                                      | Uniq | -10lgP | Mass      | Length | ppm | m/z       | z | RT    | Fraction | Scan    | Source File      | Area Roast Ara h 6 | #Feature | #Feature Roast Ara h 6 | Start | End | PTM                                    | AScore                                                                                               | Found By  |
|----------------------------------------------|------|--------|-----------|--------|-----|-----------|---|-------|----------|---------|------------------|--------------------|----------|------------------------|-------|-----|----------------------------------------|------------------------------------------------------------------------------------------------------|-----------|
| R.I(+57.02)MGEQEYDSYDIR,S                    | Y    | 121.19 | 1802.7781 | 14     | 1.9 | 902.3981  | 2 | 30.45 | 5        | F5:1466 | OB5943 H6 Ro.raw | 1.078E5            | 3        | 3                      | 55    | 68  |                                        | I1:Carbamido methylation (DHKE, X@N-term):49.43                                                      | PEAKS PTM |
| R.IM(+15.99)GEQEYDSYDIR,S                    | Y    | 118.58 | 1761.7516 | 14     | 3.3 | 881.8860  | 2 | 28.96 | 5        | F5:1366 | OB5943 H6 Ro.raw | 2.9554E6           | 4        | 4                      | 55    | 68  | Oxidation (M)                          | M2:Oxidation (M):1000.00                                                                             | PEAKS DB  |
| R.C(+57.02)MC(+57.02)EALQQIMENQC(+57.02)DR,L | Y    | 116.38 | 2084.8206 | 16     | 4.4 | 1043.4221 | 2 | 33.85 | 5        | F5:1665 | OB5943 H6 Ro.raw | 3.1431E4           | 2        | 2                      | 92    | 107 | Carbamidomethylation                   | C1:Carbamido methylation:1000.00; C3:Carbamido methylation:1000.00; C14:Carbamidomethylation:1000.00 | PEAKS DB  |
| R.ELM(+15.99)NLPQQC(+57.02)NFR,A             | Y    | 109.46 | 1564.7126 | 12     | 0.9 | 783.3643  | 2 | 29.14 | 5        | F5:1377 | OB5943 H6 Ro.raw | 9.4897E5           | 3        | 3                      | 120   | 131 | Oxidation (M); Carbamidomethylation    | M3:Oxidation (M):1000.00; C9:Carbamido methylation:1000.00                                           | PEAKS DB  |
| R.C(+57.02)C(+57.02)DELNEMENTQR,C            | Y    | 102.36 | 1697.6444 | 13     | 0.6 | 849.8300  | 2 | 27.44 | 4        | F4:1278 | OB5942 H6 Ro.raw | 3.0478E5           | 3        | 3                      | 79    | 91  | Carbamidomethylation                   | C1:Carbamido methylation:1000.00; C2:Carbamido methylation:1000.00                                   | PEAKS DB  |
| R.C(+57.02)C(+57.02)DELNEMENTQ(+.98)R,C      | Y    | 100.88 | 1698.6284 | 13     | 1.6 | 850.3229  | 2 | 28.40 | 5        | F5:1344 | OB5943 H6 Ro.raw | 3.601E5            | 3        | 3                      | 79    | 91  | Carbamidomethylation; Deamidation (NQ) | C1:Carbamido methylation:1000.00; C2:Carbamido methylation:1000.00; Q12:Deamidation (NQ):60.92       | PEAKS DB  |

total 61 peptides

| Peptide                                          | Uniq | -10lgP | Mass      | Length | ppm | m/z      | z | RT    | Fraction | Scan    | Source File      | Area Roast Ara h 6 | #Feature | #Feature Roast Ara h 6 | Start | End | PTM                                    | AScore                                                                                             | Found By  |
|--------------------------------------------------|------|--------|-----------|--------|-----|----------|---|-------|----------|---------|------------------|--------------------|----------|------------------------|-------|-----|----------------------------------------|----------------------------------------------------------------------------------------------------|-----------|
| R.C(+57.02)MC(+57.02)EALQQIMENQC(+57.02)DRLQDR.Q | Y    | 97.66  | 2597.0913 | 20     | 3.1 | 866.7070 | 3 | 33.49 | 4        | F4:1646 | OB5942 H6 Ro.raw | 2.7944E6           | 7        | 7                      | 92    | 111 | Carbamidomethylation                   | C1:Carbamidomethylation:1000.00; C3:Carbamidomethylation:1000.00; C14:Carbamidomethylation:1000.00 | PEAKS DB  |
| R.ELMNLPPQC(+71.04)NFR.A                         | Y    | 92.76  | 1562.7334 | 12     | 0.0 | 782.3740 | 2 | 31.56 | 5        | F5:1534 | OB5943 H6 Ro.raw | 2.0625E5           | 3        | 3                      | 120   | 131 | Propionamide                           | C9:Propionamide:1000.00                                                                            | PEAKS PTM |
| R.QVDRVNLKPC(+57.02)EQHIMQR.I                    | Y    | 91.79  | 2150.0837 | 17     | 0.0 | 538.5282 | 4 | 29.70 | 5        | F5:1432 | OB5943 H6 Ro.raw | 4.1805E5           | 4        | 4                      | 38    | 54  | Carbamidomethylation                   | C10:Carbamidomethylation:1000.00                                                                   | PEAKS DB  |
| R.Q(-17.03)VDRVNLKPC(+57.02)EQHIMQR.I            | Y    | 91.37  | 2133.0571 | 17     | 1.2 | 534.2722 | 4 | 30.44 | 5        | F5:1454 | OB5943 H6 Ro.raw | 8.5431E5           | 5        | 5                      | 38    | 54  | Pyro-glu from Q; Carbamidomethylation  | Q1:Pyro-glu from Q:1000.00; C10:Carbamidomethylation:1000.00                                       | PEAKS PTM |
| R.C(+71.04)C(+57.02)DELNEMENTQ(+.98)R.C          | Y    | 91.34  | 1712.6440 | 13     | 1.5 | 857.3306 | 2 | 28.58 | 5        | F5:1345 | OB5943 H6 Ro.raw | 2.2455E5           | 2        | 2                      | 79    | 91  | Carbamidomethylation; Deamidation (NQ) | C1:Propionamide:14,02; C2:Carbamidomethylation:1000.00; Q12:Deamidation (NQ):67.96                 | PEAKS PTM |
| R.VNLKPC(+57.02)EQHIMQR.I                        | Y    | 89.73  | 1651.8286 | 13     | 0.5 | 551.6171 | 3 | 28.40 | 5        | F5:1356 | OB5943 H6 Ro.raw | 1.1244E6           | 6        | 6                      | 42    | 54  | Carbamidomethylation                   | C6:Carbamidomethylation:1000.00                                                                    | PEAKS DB  |

total 61 peptides

| Peptide                                              | Uniq | -10lgP | Mass      | Length | ppm  | m/z       | z | RT    | Fraction | Scan    | Source File      | Area Roast Ara h 6 | #Feature | #Feature Roast Ara h 6 | Start | End | PTM                                                                                  | AScore                                                                                                                                              | Found By  |
|------------------------------------------------------|------|--------|-----------|--------|------|-----------|---|-------|----------|---------|------------------|--------------------|----------|------------------------|-------|-----|--------------------------------------------------------------------------------------|-----------------------------------------------------------------------------------------------------------------------------------------------------|-----------|
| R.C(-17.03)C(+57.02)D(+57.02)ELNEMENTQR.C            | Y    | 88.83  | 1680.6178 | 13     | 1.0  | 841.3170  | 2 | 32.29 | 5        | F5:1575 | OB5943 H6 Ro.raw | 3.9042E4           | 2        | 2                      | 79    | 91  | Ammonia-loss (C@N-term); Carbamidomethylation                                        | C1:Ammonia-loss (C@N-term):1000.00;C2:Carbamidomethylation:1000.00;D3:Carbamidomethylation (DHKE, X@N-term):33.98                                   | PEAKS PTM |
| R.C(-17.03)MC(+57.02)E(+57.02)ALQQIMENQC(+57.02)DR.L | Y    | 87.36  | 2067.7942 | 16     | 3.0  | 1034.9075 | 2 | 38.83 | 5        | F5:1953 | OB5943 H6 Ro.raw | 2.7406E4           | 2        | 2                      | 92    | 107 | Ammonia-loss (C@N-term); Carbamidomethylation; Carbamidomethylation (DHKE, X@N-term) | C1:Ammonia-loss (C@N-term):1000.00;C3:Carbamidomethylation:1000.00;E4:Carbamidomethylation (DHKE, X@N-term):151.49;C14:Carbamidomethylation:1000.00 | PEAKS PTM |
| R.C(+57.02)C(+71.04)DELNEMENTQR.C                    | Y    | 86.36  | 1711.6600 | 13     | 1.0  | 856.8381  | 2 | 27.64 | 4        | F4:1283 | OB5942 H6 Ro.raw | 2.8007E5           | 3        | 3                      | 79    | 91  | Carbamidomethylation                                                                 | C1:Carbamidomethylation:1000.00;C2:Propionamide:10.11                                                                                               | PEAKS PTM |
| R.Q(-17.03)MVQQFKR.E                                 | Y    | 84.77  | 1046.5331 | 8      | 0.0  | 524.2738  | 2 | 27.84 | 5        | F5:1322 | OB5943 H6 Ro.raw | 3.5192E5           | 3        | 3                      | 112   | 119 | Pyro-glu from Q                                                                      | Q1:Pyro-glu from Q:1000.00                                                                                                                          | PEAKS PTM |
| R.C(+57.02)DLDVSGGRC(+57.02)                         | Y    | 83.20  | 1137.4543 | 10     | -0.5 | 569.7342  | 2 | 25.28 | 5        | F5:1158 | OB5943 H6 Ro.raw | 4.867E4            | 3        | 3                      | 136   | 145 | Carbamidomethylation                                                                 | C1:Carbamidomethylation:1000.00;C10:Carbamidomethylation:1000.00                                                                                    | PEAKS DB  |

total 61 peptides

| Peptide                                                  | Uniq | -10lgP | Mass      | Length | ppm  | m/z      | z | RT    | Fraction | Scan    | Source File      | Area Roast Ara h 6 | #Feature | #Feature Roast Ara h 6 | Start | End | PTM                                 | AScore                                                                                                                     | Found By  |
|----------------------------------------------------------|------|--------|-----------|--------|------|----------|---|-------|----------|---------|------------------|--------------------|----------|------------------------|-------|-----|-------------------------------------|----------------------------------------------------------------------------------------------------------------------------|-----------|
| R.C(+57.02)(+28.03)C(+57.02)DELNEMENTQR.C                | Y    | 82.43  | 1725.6757 | 13     | 1.0  | 863.8460 | 2 | 28.03 | 5        | F5:1316 | OB5943 H6 Ro.raw | 1.6949E4           | 1        | 1                      | 79    | 91  | Carbamidomethylation                | C1:Carbamidomethylation:1000.00; C1:Ethylation:18.53; C2:Carbamidomethylation:1000.00                                      | PEAKS PTM |
| R.C(+71.04)DLDVSGGRC(+57.02)                             | Y    | 81.95  | 1151.4700 | 10     | 0.9  | 576.7428 | 2 | 25.64 | 5        | F5:1183 | OB5943 H6 Ro.raw | 1.3899E4           | 3        | 3                      | 136   | 145 | Propionamide; Carbamidomethylation  | C1:Propionamide:156.52; C10:Carbamidomethylation:1000.00                                                                   | PEAKS PTM |
| R.C(+71.04)MC(+57.02)EALQQIMENQC(+57.02)DRLQDR.Q         | Y    | 81.33  | 2611.1069 | 20     | 1.1  | 871.3772 | 3 | 33.49 | 4        | F4:1647 | OB5942 H6 Ro.raw | 6.2487E5           | 2        | 2                      | 92    | 111 | Carbamidomethylation                | C1:Propionamide:20.41; C3:Carbamidomethylation:1000.00; C14:Carbamidomethylation:1000.00                                   | PEAKS PTM |
| R.C(+57.02)M(+15.99)C(+57.02)EALQQIMENQC(+57.02)DRLQDR.Q | Y    | 72.82  | 2613.0862 | 20     | 1.4  | 872.0372 | 3 | 31.19 | 5        | F5:1576 | OB5943 H6 Ro.raw | 5.7636E5           | 5        | 5                      | 92    | 111 | Carbamidomethylation; Oxidation (M) | C1:Carbamidomethylation:1000.00; M2:Oxidation (M):89.48; C3:Carbamidomethylation:1000.00; C14:Carbamidomethylation:1000.00 | PEAKS DB  |
| R.ELM(-48.00)NLPQQC(+57.02)NFR.A                         | Y    | 71.71  | 1500.7144 | 12     | -0.1 | 501.2454 | 3 | 27.84 | 5        | F5:1311 | OB5943 H6 Ro.raw | 2.9967E5           | 2        | 2                      | 120   | 131 | Dethiomethyl; Carbamidomethylation  | M3:Dethiomethyl:100.00; C9:Carbamidomethylation:1000.00                                                                    | PEAKS PTM |

total 61 peptides



| Peptide                                         | Uniq | -10lgP | Mass      | Length | ppm  | m/z      | z | RT    | Fraction | Scan    | Source File      | Area Roast Ara h 6 | #Feature | #Feature Roast Ara h 6 | Start | End | PTM                  | AScore                                                                                                         | Found By  |
|-------------------------------------------------|------|--------|-----------|--------|------|----------|---|-------|----------|---------|------------------|--------------------|----------|------------------------|-------|-----|----------------------|----------------------------------------------------------------------------------------------------------------|-----------|
| R.C(+57.02)DLDVSGGR.C                           | Y    | 64.95  | 977.4236  | 9      | -0.5 | 489.7189 | 2 | 24.23 | 6        | F6:1121 | OB5944 H6 Ro.raw | 8.8623E2           | 1        | 1                      | 136   | 144 | Carbamidomethylation | C1:Carbamidomethylation:1000.00                                                                                | PEAKS DB  |
| R.C(+71.04)C(+57.02)DELNEMENTQR.C               | Y    | 63.78  | 1711.6600 | 13     | 1.0  | 856.8381 | 2 | 27.64 | 4        | F4:1317 | OB5942 H6 Ro.raw | 1.8297E5           | 2        | 2                      | 79    | 91  | Carbamidomethylation | C1:Propionamide:8.69;C2:Carbamidomethylation:1000.00                                                           | PEAKS PTM |
| R.C(+57.02)(+28.03)C(+57.02)DELNEMENTQ(+.98)R.C | Y    | 63.72  | 1726.6597 | 13     | 9.5  | 864.3453 | 2 | 28.38 | 4        | F4:1339 | OB5942 H6 Ro.raw | 2.3202E3           | 1        | 1                      | 79    | 91  | Carbamidomethylation | C1:Carbamidomethylation:1000.00;C1:Ethylation:22.85;C2:Carbamidomethylation:1000.00;Q12:Deamidation (NQ):20.63 | PEAKS PTM |
| R.ELMNLPQQC(+57.02)NF(+31.99)R.A                | Y    | 63.29  | 1580.7075 | 12     | -9.5 | 791.3535 | 2 | 31.67 | 4        | F4:1538 | OB5942 H6 Ro.raw | 0                  | 0        | 0                      | 120   | 131 | Carbamidomethylation | C9:Carbamidomethylation:1000.00;F11:Dihydroxy:0.00                                                             | PEAKS PTM |
| R.IM(+15.99)GE(+57.02)QEYDSYDIR.S               | Y    | 61.28  | 1818.7729 | 14     | 0.3  | 910.3940 | 2 | 29.25 | 5        | F5:1394 | OB5943 H6 Ro.raw | 2.5217E3           | 1        | 1                      | 55    | 68  | Oxidation (M)        | M2:Oxidation (M):1000.00;E4:Carbamidomethylation (DHKE, X@N-term):0.00                                         | PEAKS PTM |
| R.ELMNLPQQC(+57.02)N(+.98)FRAPQR.C              | Y    | 60.15  | 2001.9513 | 16     | 1.0  | 668.3250 | 3 | 30.88 | 5        | F5:1490 | OB5943 H6 Ro.raw | 0                  | 0        | 0                      | 120   | 135 | Carbamidomethylation | C9:Carbamidomethylation:1000.00;N10:Deamidation (NQ):24.24                                                     | PEAKS DB  |

total 61 peptides

| Peptide                                 | Uniq | -10lgP | Mass      | Length | ppm  | m/z      | z | RT    | Fraction | Scan    | Source File      | Area Roast Ara h 6 | #Feature | #Feature Roast Ara h 6 | Start | End | PTM                                    | AScore                                                                                                   | Found By  |
|-----------------------------------------|------|--------|-----------|--------|------|----------|---|-------|----------|---------|------------------|--------------------|----------|------------------------|-------|-----|----------------------------------------|----------------------------------------------------------------------------------------------------------|-----------|
| R.C(+57.02)C(+71.04)DELNEMENTQ(+.98)R.C | Y    | 60.08  | 1712.6440 | 13     | -0.7 | 857.3287 | 2 | 28.30 | 6        | F6:1333 | OB5944 H6 Ro.raw | 1.8621E5           | 2        | 2                      | 79    | 91  | Carbamidomethylation; Deamidation (NQ) | C1:Carbamido methylation:1000.00; C2:Propionamide:0.00; Q12:Deamidation (NQ):55.92                       | PEAKS PTM |
| R.VNLK(+41.03)PC(+57.02)EQHIMQR.I       | Y    | 59.14  | 1692.8552 | 13     | 3.3  | 565.2942 | 3 | 29.51 | 5        | F5:1408 | OB5943 H6 Ro.raw | 4.1722E3           | 1        | 1                      | 42    | 54  | Carbamidomethylation                   | K4:Amidation of lysines or N-terminal amines with methyl acetate:38.16; C6:Carbamido methylation:1000.00 | PEAKS PTM |
| R.ELM(+15.99)NLPQQC(+71.04)NFR.A        | Y    | 59.00  | 1578.7283 | 12     | 1.8  | 790.3729 | 2 | 29.10 | 6        | F6:1390 | OB5944 H6 Ro.raw | 0                  | 0        | 0                      | 120   | 131 | Oxidation (M); Propionamide            | M3:Oxidation (M):1000.00; C9:Propionamide:1000.00                                                        | PEAKS PTM |
| R.IMGEQEYDSYDIRSTR.S                    | Y    | 56.36  | 2089.9375 | 17     | 2.0  | 697.6545 | 3 | 28.94 | 4        | F4:1381 | OB5942 H6 Ro.raw | 7.2826E4           | 3        | 3                      | 55    | 71  |                                        |                                                                                                          | PEAKS DB  |
| R.C(+57.02)C(+57.02)DELN(+.98)EMENTQR.C | Y    | 52.99  | 1698.6284 | 13     | -1.6 | 850.3201 | 2 | 29.09 | 4        | F4:1387 | OB5942 H6 Ro.raw | 0                  | 0        | 0                      | 79    | 91  | Carbamidomethylation                   | C1:Carbamido methylation:1000.00; C2:Carbamido methylation:1000.00; N6:Deamidation (NQ):31.56            | PEAKS DB  |
| R.VNLKPC(+57.02)EQHIM(+15.99)QR.I       | Y    | 52.99  | 1667.8236 | 13     | 0.6  | 556.9488 | 3 | 26.91 | 4        | F4:1258 | OB5942 H6 Ro.raw | 2.1143E4           | 1        | 1                      | 42    | 54  | Carbamidomethylation; Oxidation (M)    | C6:Carbamido methylation:1000.00; M11:Oxidation (M):1000.00                                              | PEAKS DB  |
| R.VNLKPC(+71.04)EQHIMQR.I               | Y    | 52.61  | 1665.8444 | 13     | -0.4 | 556.2885 | 3 | 28.77 | 5        | F5:1372 | OB5943 H6 Ro.raw | 2.0373E4           | 1        | 1                      | 42    | 54  | Propionamide                           | C6:Propionamide:1000.00                                                                                  | PEAKS PTM |

total 61 peptides

| Peptide                                                          | Uniq | -10lgP | Mass      | Length | ppm  | m/z      | z | RT    | Fraction | Scan    | Source File      | Area Roast Ara h 6 | #Feature | #Feature Roast Ara h 6 | Start | End | PTM                                 | AScore                                                                                                                                                    | Found By  |
|------------------------------------------------------------------|------|--------|-----------|--------|------|----------|---|-------|----------|---------|------------------|--------------------|----------|------------------------|-------|-----|-------------------------------------|-----------------------------------------------------------------------------------------------------------------------------------------------------------|-----------|
| R.QMVQQFK,R                                                      | Y    | 51.26  | 907.4586  | 7      | -0.6 | 454.7363 | 2 | 25.61 | 6        | F6:1183 | OB5944 H6 Ro.raw | 8.0264E3           | 2        | 2                      | 112   | 118 |                                     |                                                                                                                                                           | PEAKS DB  |
| R.C(+57.02)M(+15.99)C(+57.02)EALQQIM(+15.99)ENQC(+57.02)DRLQDR.Q | Y    | 49.37  | 2629.0811 | 20     | 2.0  | 877.3694 | 3 | 29.88 | 5        | F5:1425 | OB5943 H6 Ro.raw | 7.9642E3           | 1        | 1                      | 92    | 111 | Carbamidomethylation; Oxidation (M) | C1:Carbamido methylation:1000.00; M2:Oxidation (M):1000.00; C3:Carbamido methylation:1000.00; M10:Oxidation (M):1000.00; C14:Carbamidomethylation:1000.00 | PEAKS DB  |
| R.IMGEQE(+53.92)QYDSYDIR,S                                       | Y    | 48.83  | 1799.6759 | 14     | -2.3 | 600.8979 | 3 | 30.20 | 5        | F5:1450 | OB5943 H6 Ro.raw | 0                  | 0        | 0                      | 55    | 68  |                                     | E6:Replacement of 2 protons by iron:22.85                                                                                                                 | PEAKS PTM |
| R.ELMNLPPQC(+57.02)NFRAPQR.C                                     | Y    | 48.77  | 2000.9673 | 16     | 0.9  | 667.9969 | 3 | 30.26 | 5        | F5:1456 | OB5943 H6 Ro.raw | 6.8362E4           | 3        | 3                      | 120   | 135 | Carbamidomethylation                | C9:Carbamido methylation:1000.00                                                                                                                          | PEAKS DB  |
| R.Q(-17.03)M(+15.99)VQQFKR.E                                     | Y    | 48.54  | 1062.5281 | 8      | 3.0  | 532.2729 | 2 | 25.67 | 5        | F5:1189 | OB5943 H6 Ro.raw | 0                  | 0        | 0                      | 112   | 119 | Pyro-glu from Q; Oxidation (M)      | Q1:Pyro-glu from Q:1000.00; M2:Oxidation (M):1000.00                                                                                                      | PEAKS PTM |
| R.IMGE(+17.03)QEYDSYDIR,S                                        | Y    | 48.35  | 1762.7832 | 14     | -4.0 | 882.3953 | 2 | 30.83 | 4        | F4:1488 | OB5942 H6 Ro.raw | 0                  | 0        | 0                      | 55    | 68  |                                     | E4:Replacement of proton with ammonium ion:18.53                                                                                                          | PEAKS PTM |
| K.RELMNLPPQC(+57.02)NFR.A                                        | Y    | 48.08  | 1704.8188 | 13     | 0.8  | 569.2807 | 3 | 29.89 | 4        | F4:1434 | OB5942 H6 Ro.raw | 0                  | 0        | 0                      | 119   | 131 | Carbamidomethylation                | C10:Carbamidomethylation:1000.00                                                                                                                          | PEAKS DB  |

total 61 peptides

| Peptide                                         | Uniq | -10lgP | Mass      | Length | ppm  | m/z      | z | RT    | Fraction | Scan    | Source File      | Area Roast Ara h 6 | #Feature | #Feature Roast Ara h 6 | Start | End | PTM                                                      | AScore                                                                                                                | Found By  |
|-------------------------------------------------|------|--------|-----------|--------|------|----------|---|-------|----------|---------|------------------|--------------------|----------|------------------------|-------|-----|----------------------------------------------------------|-----------------------------------------------------------------------------------------------------------------------|-----------|
| R.C(+71.04)C(+57.02)DELNEMEN(+.98)TQR.C         | Y    | 47.24  | 1712.6440 | 13     | -0.7 | 857.3287 | 2 | 28.30 | 6        | F6:1367 | OB5944 H6 Ro.raw | 9.9111E4           | 1        | 1                      | 79    | 91  | Carbamidomethylation                                     | C1:Propionamide:0.00;C2:Carbamidomethylation:1000.00;N10:Deamidation (NQ):40.21                                       | PEAKS PTM |
| R.IM(+15.99)GEQEYQDSYDIRSTR.S                   | Y    | 47.11  | 2105.9324 | 17     | -1.9 | 702.9834 | 3 | 27.45 | 4        | F4:1288 | OB5942 H6 Ro.raw | 2.3858E3           | 1        | 1                      | 55    | 71  | Oxidation (M)                                            | M2:Oxidation (M):1000.00                                                                                              | PEAKS DB  |
| R.IMGEQEYQ(-18.01)DSYDIR.S                      | Y    | 46.28  | 1727.7461 | 14     | 3.4  | 864.8833 | 2 | 30.78 | 5        | F5:1484 | OB5943 H6 Ro.raw | 0                  | 0        | 0                      | 55    | 68  |                                                          | Y8:Dehydration:0.00                                                                                                   | PEAKS PTM |
| R.IMGEQEYQ(+125.90)DSYDIR.S                     | Y    | 43.24  | 1871.6533 | 14     | 2.0  | 936.8358 | 2 | 32.29 | 5        | F5:1560 | OB5943 H6 Ro.raw | 6.88E3             | 1        | 1                      | 55    | 68  |                                                          | Y8:Iodination:41.59                                                                                                   | PEAKS PTM |
| R.I(+57.02)M(+15.99)GEQEYQDSYDIR.S              | Y    | 42.43  | 1818.7729 | 14     | 0.8  | 910.3945 | 2 | 28.84 | 4        | F4:1372 | OB5942 H6 Ro.raw | 0                  | 0        | 0                      | 55    | 68  | Oxidation (M)                                            | I1:Carbamidomethylation (DHKE, X@N-term):17.32;M2:Oxidation (M):1000.00                                               | PEAKS PTM |
| R.C(+57.02)C(+57.02)DELN(-17.03)EMENTQ(+.98)R.C | Y    | 42.31  | 1681.6018 | 13     | 0.9  | 841.8090 | 2 | 32.39 | 6        | F6:1584 | OB5944 H6 Ro.raw | 0                  | 0        | 0                      | 79    | 91  | Carbamidomethylation; Ammonia-loss (N); Deamidation (NQ) | C1:Carbamidomethylation:1000.00;C2:Carbamidomethylation:1000.00;N6:Ammonia-loss (N):105.60;Q12:Deamidation (NQ):55.92 | PEAKS PTM |

total 61 peptides

| Peptide                                                  | Uniq | -10lgP | Mass      | Length | ppm  | m/z      | z | RT    | Fraction | Scan    | Source File      | Area Roast Ara h 6 | #Feature | #Feature Roast Ara h 6 | Start | End | PTM                                                                                  | AScore                                                                                                                                             | Found By  |
|----------------------------------------------------------|------|--------|-----------|--------|------|----------|---|-------|----------|---------|------------------|--------------------|----------|------------------------|-------|-----|--------------------------------------------------------------------------------------|----------------------------------------------------------------------------------------------------------------------------------------------------|-----------|
| R.C(-17.03)MC(+57.02)E(+57.02)ALQQIMENQC(+57.02)DRLQDR.Q | Y    | 42.03  | 2580.0647 | 20     | 2.2  | 861.0307 | 3 | 37.62 | 5        | F5:1929 | OB5943 H6 Ro.raw | 1.6912E5           | 1        | 1                      | 92    | 111 | Ammonia-loss (C@N-term); Carbamidomethylation; Carbamidomethylation (DHKE, X@N-term) | C1:Ammonia-loss (C@N-term):1000.00;C3:Carbamidomethylation:1000.00;E4:Carbamidomethylation (DHKE, X@N-term):79.54;C14:Carbamidomethylation:1000.00 | PEAKS PTM |
| R.C(+71.04)C(+57.02)DELN(+.98)EMENTQR.C                  | Y    | 40.31  | 1712.6440 | 13     | -0.7 | 857.3287 | 2 | 28.30 | 6        | F6:1382 | OB5944 H6 Ro.raw | 9.9111E4           | 1        | 1                      | 79    | 91  | Carbamidomethylation                                                                 | C1:Propionamide:0.00;C2:Carbamidomethylation:1000.00;N6:Deamidation (NQ):0.00                                                                      | PEAKS PTM |
| R.QMVQQFKR.E                                             | Y    | 39.82  | 1063.5597 | 8      | 0.9  | 532.7876 | 2 | 26.84 | 5        | F5:1239 | OB5943 H6 Ro.raw | 1.9987E4           | 2        | 2                      | 112   | 119 |                                                                                      |                                                                                                                                                    | PEAKS DB  |
| R.E(+53.92)LMNLPQQC(+57.02)NFR.A                         | Y    | 39.79  | 1602.6370 | 12     | -0.1 | 802.3257 | 2 | 31.08 | 4        | F4:1503 | OB5942 H6 Ro.raw | 0                  | 0        | 0                      | 120   | 131 | Replacement of 2 protons by iron; Carbamidomethylation                               | E1:Replacement of 2 protons by iron:76.82;C9:Carbamidomethylation:1000.00                                                                          | PEAKS PTM |
| C.C(+57.02)D(+21.98)E(+21.98)LNEMENTQR.C                 | Y    | 39.39  | 1581.5776 | 12     | 6.2  | 791.8010 | 2 | 29.69 | 5        | F5:1412 | OB5943 H6 Ro.raw | 7.5318E3           | 1        | 1                      | 80    | 91  | Carbamidomethylation; Sodium adduct                                                  | C1:Carbamidomethylation:1000.00;D2:Sodium adduct:68.53;E3:Sodium adduct:69.29                                                                      | PEAKS PTM |

total 61 peptides

| Peptide                                                          | Uniq | -10lgP | Mass      | Length | ppm  | m/z      | z | RT    | Fraction | Scan    | Source File      | Area Roast Ara h 6 | #Feature | #Feature Roast Ara h 6 | Start | End | PTM                                                  | AScore                                                                                                                                             | Found By  |
|------------------------------------------------------------------|------|--------|-----------|--------|------|----------|---|-------|----------|---------|------------------|--------------------|----------|------------------------|-------|-----|------------------------------------------------------|----------------------------------------------------------------------------------------------------------------------------------------------------|-----------|
| R.E(-18.01)LMNLPQQC(+57.02)NFR.A                                 | Y    | 38.68  | 1530.7072 | 12     | 1.3  | 766.3618 | 2 | 34.58 | 4        | F4:1708 | OB5942 H6 Ro.raw | 7.6045E3           | 1        | 1                      | 120   | 131 | Pyro-glu from E; Carbamidomethylation                | E1:Pyro-glu from E:1000.00; C9:Carbamidomethylation:1000.00                                                                                        | PEAKS PTM |
| R.ELM(+15.99)NLPQQC(+57.02)NFR(+14.02).A                         | Y    | 35.11  | 1578.7283 | 12     | 0.4  | 790.3718 | 2 | 29.32 | 5        | F5:1402 | OB5943 H6 Ro.raw | 9.8676E3           | 1        | 1                      | 120   | 131 | Oxidation (M); Carbamidomethylation; Methylation(KR) | M3:Oxidation (M):1000.00; C9:Carbamidomethylation:1000.00; R12:Methylation(KR):1000.00                                                             | PEAKS PTM |
| R.C(+57.02)MC(+57.02)EALQQIM(+15.99)ENQC(+57.02)D(-18.01)RLQDR.Q | Y    | 34.82  | 2595.0757 | 20     | 1.8  | 866.0341 | 3 | 33.29 | 4        | F4:1627 | OB5942 H6 Ro.raw | 2.8862E4           | 1        | 1                      | 92    | 111 | Carbamidomethylation; Oxidation (M)                  | C1:Carbamidomethylation:1000.00; C3:Carbamidomethylation:1000.00; M10:Oxidation (M):73.05; C14:Carbamidomethylation:1000.00; D15:Dehydration:14.19 | PEAKS PTM |
| R.ELM(+15.99)NLPQQC(+57.02)NFRAPQR.C                             | Y    | 33.01  | 2016.9622 | 16     | 2.0  | 673.3293 | 3 | 28.58 | 5        | F5:1359 | OB5943 H6 Ro.raw | 7.79E3             | 1        | 1                      | 120   | 135 | Oxidation (M); Carbamidomethylation                  | M3:Oxidation (M):1000.00; C9:Carbamidomethylation:1000.00                                                                                          | PEAKS DB  |
| R.IMGE(+21.98)QEYDSYDIR.S                                        | Y    | 32.81  | 1767.7385 | 14     | -1.3 | 884.8754 | 2 | 29.94 | 4        | F4:1442 | OB5942 H6 Ro.raw | 1.7258E4           | 1        | 1                      | 55    | 68  |                                                      | E4:Sodium adduct:0.00                                                                                                                              | PEAKS PTM |

total 61 peptides

| Peptide                                       | Uniq | -10lgP | Mass      | Length | ppm | m/z      | z | RT    | Fraction | Scan    | Source File      | Area Roast Ara h 6 | #Feature | #Feature Roast Ara h 6 | Start | End | PTM                                                  | AScore                                                                                  | Found By  |
|-----------------------------------------------|------|--------|-----------|--------|-----|----------|---|-------|----------|---------|------------------|--------------------|----------|------------------------|-------|-----|------------------------------------------------------|-----------------------------------------------------------------------------------------|-----------|
| R.Q(-17.03)VDRVNLKPC(+57.02)EQHIM(+15.99)QR.I | Y    | 30.83  | 2149.0520 | 17     | 1.1 | 538.2709 | 4 | 28.97 | 4        | F4:1380 | OB5942 H6 Ro.raw | 0                  | 0        | 0                      | 38    | 54  | Pyro-glu from Q; Carbamidomethylation; Oxidation (M) | Q1:Pyro-glu from Q:1000.00; C10:Carbamidomethylation:1000.00; M15:Oxidation (M):1000.00 | PEAKS PTM |
| total 61 peptides                             |      |        |           |        |     |          |   |       |          |         |                  |                    |          |                        |       |     |                                                      |                                                                                         |           |

N1NG13|N1NG13\_ARAHY

back to list

| Protein Coverage | Supporting Peptides |

Protein Coverage:

1MRGRVSPMLLLGILVLASVSATHAKSSPYQKKTENPCAQRCLQSCQQEPDDLKQKACESRCTKLEYDPRCVYDPRGHTG

81TTNQRSPPGERTRGRQPGDYDDRRQPRREEGGRWGPFAGEREREREEDWRQPREDWRRPSHQQPRKIRPEGREGQEWGT

161PGSHVREETSRNNPFYFPSRRFSTRYGNQNGRIRVLQRFQSRQFQNLQNHRIVQIEAKPNTLVLPKHA DADNILVIOQ

241GQATVTVANGNNRKSFNLDEGHALRIPSGFISYILNRHDNQNLRVAKISMVNTPGQFEDFFPASSRDQS SYLQGF SRNT

321LEAAFNAEFNEIRRVLLEENAGGEQEERGQRRWSTRSSENNEGVIVKVSKEHVEELTKHAKSVSKKGSEEGDITNPINL

401REGEPDLSNFFGKLFEVKPDKNPQLQDLDMLTLCVEIKEGALMLPHFNSKAMVIVVVKGTGNLELVAVRKEQQQRGR

481EEEEDEDEEEEGSNREVRRTARLKEGDVFIMPAAHVPAINASSELHLLFGINAENNHRIFLAGDKDNVIDQIEKQAKD

561LAFPGSGEQVEKLIKNNQKESHFVSARPSQSQSPSSPEKESPEKEDQEEE NQGGKGPLL SILKAFN

46

290

Carbamidomethylation (+57.02)

Oxidation (M) (+15.99)

Supporting Peptides:

| Peptide          | Uniq | -10lgP | Mass      | Length | ppm | m/z      | z | RT    | Fraction | Scan    | Source File      | Area Roast Ara h 6 | #Feature | #Feature Roast Ara h 6 | Start | End | PTM | AScore | Found By |
|------------------|------|--------|-----------|--------|-----|----------|---|-------|----------|---------|------------------|--------------------|----------|------------------------|-------|-----|-----|--------|----------|
| R.IPSGFISYILNR.H | N    | 116.76 | 1378.7609 | 12     | 1.0 | 690.3884 | 2 | 36.77 | 4        | F4:1833 | OB5942 H6 Ro.raw | 4.949E5            | 3        | 3                      | 266   | 277 |     |        | PEAKS DB |
| K.SFNLDEGHALR.I  | N    | 105.18 | 1257.6101 | 11     | 0.5 | 629.8126 | 2 | 28.96 | 5        | F5:1378 | OB5943 H6 Ro.raw | 6.7733E4           | 3        | 3                      | 255   | 265 |     |        | PEAKS DB |
| R.DQSSYLQGFSR.N  | N    | 104.35 | 1286.5891 | 11     | 0.5 | 644.3021 | 2 | 30.70 | 6        | F6:1482 | OB5944 H6 Ro.raw | 7.4069E4           | 3        | 3                      | 308   | 318 |     |        | PEAKS DB |

total 20 peptides

| Peptide                                           | Uniq | -10lgP | Mass      | Length | ppm  | m/z       | z | RT    | Fraction | Scan    | Source File      | Area Roast Ara h 6 | #Feature | #Feature Roast Ara h 6 | Start | End | PTM                  | AScore                                                                                                        | Found By  |
|---------------------------------------------------|------|--------|-----------|--------|------|-----------|---|-------|----------|---------|------------------|--------------------|----------|------------------------|-------|-----|----------------------|---------------------------------------------------------------------------------------------------------------|-----------|
| K.ISMPVNTPGQFEDFFPASSR,D                          | N    | 100.55 | 2226.0415 | 20     | 2.5  | 1114.0308 | 2 | 35.60 | 4        | F4:1757 | OB5942 H6 Ro.raw | 1.7538E5           | 3        | 3                      | 288   | 307 |                      |                                                                                                               | PEAKS DB  |
| R.VLLEENAGGEQEER.G                                | N    | 100.30 | 1571.7427 | 14     | 0.7  | 786.8792  | 2 | 26.60 | 4        | F4:1237 | OB5942 H6 Ro.raw | 6.3383E3           | 1        | 1                      | 335   | 348 |                      |                                                                                                               | PEAKS DB  |
| K.ISM(+15.99)PVNTPGQFEDFFPASSR,D                  | N    | 85.41  | 2242.0364 | 20     | 2.1  | 1122.0278 | 2 | 34.54 | 5        | F5:1702 | OB5943 H6 Ro.raw | 2.1861E4           | 2        | 2                      | 288   | 307 | Oxidation (M)        | M3:Oxidation (M):1000.00                                                                                      | PEAKS DB  |
| R.NNPFYFPSRR,F                                    | N    | 79.01  | 1296.6364 | 10     | 1.1  | 649.3262  | 2 | 30.07 | 5        | F5:1443 | OB5943 H6 Ro.raw | 9.0774E4           | 3        | 3                      | 172   | 181 |                      |                                                                                                               | PEAKS DB  |
| R.NNPFYFPSR,R                                     | N    | 78.65  | 1140.5352 | 9      | 1.8  | 571.2759  | 2 | 31.84 | 5        | F5:1546 | OB5943 H6 Ro.raw | 5.7869E3           | 2        | 2                      | 172   | 180 |                      |                                                                                                               | PEAKS DB  |
| R.NTLEAAFAEFNEIR,R                                | N    | 78.54  | 1737.8322 | 15     | 0.3  | 869.9236  | 2 | 35.52 | 4        | F4:1762 | OB5942 H6 Ro.raw | 1.2135E3           | 1        | 1                      | 319   | 333 |                      |                                                                                                               | PEAKS DB  |
| R.IFLAGDKDNVIDQIEK,Q                              | N    | 78.42  | 1816.9570 | 16     | -0.1 | 909.4857  | 2 | 33.42 | 5        | F5:1643 | OB5943 H6 Ro.raw | 2.878E5            | 6        | 6                      | 541   | 556 |                      |                                                                                                               | PEAKS DB  |
| R.IVQIEAKPNTLVLPK,H                               | Y    | 77.37  | 1662.0079 | 15     | 2.9  | 832.0137  | 2 | 30.14 | 4        | F4:1444 | OB5942 H6 Ro.raw | 6.3611E4           | 3        | 3                      | 214   | 228 |                      |                                                                                                               | PEAKS DB  |
| K.SFNLDEGHALRIPSGFISYILNR,H                       | N    | 64.24  | 2618.3604 | 23     | 0.8  | 873.7948  | 3 | 38.22 | 4        | F4:1918 | OB5942 H6 Ro.raw | 1.6862E4           | 1        | 1                      | 255   | 277 |                      |                                                                                                               | PEAKS DB  |
| R.NTLEAAFAEFNEIRR,V                               | N    | 54.71  | 1893.9332 | 16     | -2.3 | 632.3169  | 3 | 34.83 | 5        | F5:1724 | OB5943 H6 Ro.raw | 4.2865E5           | 5        | 5                      | 319   | 334 |                      |                                                                                                               | PEAKS DB  |
| K.DLAFPGSGEQVEK,L                                 | N    | 54.25  | 1375.6619 | 13     | 0.6  | 688.8386  | 2 | 30.14 | 4        | F4:1453 | OB5942 H6 Ro.raw | 1.9909E4           | 2        | 2                      | 560   | 572 |                      |                                                                                                               | PEAKS DB  |
| K.HADADNILVIQQGQATVTVANGNNRK,S                    | N    | 53.99  | 2746.4111 | 26     | 1.5  | 916.4790  | 3 | 30.13 | 5        | F5:1446 | OB5943 H6 Ro.raw | 0                  | 0        | 0                      | 229   | 254 |                      |                                                                                                               | PEAKS DB  |
| K.KGSEEEGDITNPINLREGEPLDLSNNFGK,L                 | Y    | 49.97  | 3058.4478 | 28     | 4.0  | 1020.4939 | 3 | 30.91 | 4        | F4:1493 | OB5942 H6 Ro.raw | 0                  | 0        | 0                      | 386   | 413 |                      |                                                                                                               | PEAKS DB  |
| R,C(+57.02)LQS(-18.01)C(+57.02)Q(+.98)QEPDDLKQK,A | N    | 47.12  | 1858.8190 | 15     | -0.1 | 930.4167  | 2 | 28.47 | 4        | F4:1350 | OB5942 H6 Ro.raw | 0                  | 0        | 0                      | 42    | 56  | Carbamidomethylation | C1:Carbamidomethylation:1000.00;S4:Dehydration:39.55;C5:Carbamidomethylation:1000.00;Q6:Deamidation (NQ):0.00 | PEAKS PTM |
| K.HADADNILVIQQGQATVTVANGN(+.98)NRK,S              | N    | 34.54  | 2747.3950 | 26     | 2.3  | 916.8077  | 3 | 29.76 | 4        | F4:1422 | OB5942 H6 Ro.raw | 8.5956E3           | 1        | 1                      | 229   | 254 |                      | N23:Deamidation (NQ):0.00                                                                                     | PEAKS DB  |
| K.HADADNILVIQQGQATVTVAN(+.98)GNNRK,S              | N    | 32.47  | 2747.3950 | 26     | 1.1  | 687.8568  | 4 | 30.07 | 5        | F5:1448 | OB5943 H6 Ro.raw | 2.5891E3           | 1        | 1                      | 229   | 254 |                      | N21:Deamidation (NQ):0.00                                                                                     | PEAKS DB  |
| R.IPSGFISYILNRHDNQNL,R                            | N    | 31.95  | 2256.1763 | 19     | 2.8  | 753.0681  | 3 | 34.64 | 4        | F4:1759 | OB5942 H6 Ro.raw | 5.949E4            | 1        | 1                      | 266   | 284 |                      |                                                                                                               | PEAKS DB  |

total 20 peptides

sp|P43238|ALL12\_ARAHY

[back to list](#)

| [Protein Coverage](#) | [Supporting Peptides](#) |

Protein Coverage:



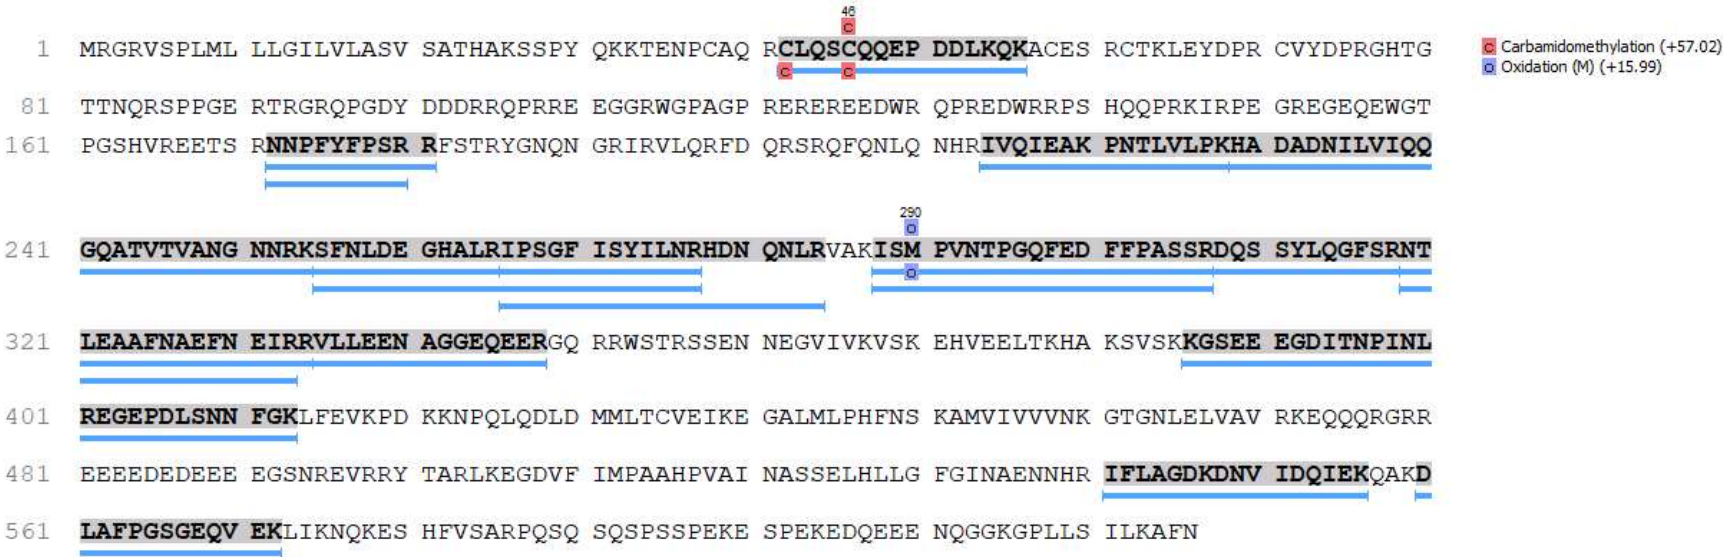

Supporting Peptides:

| Peptide                          | Uniq | -10lgP | Mass      | Length | ppm  | m/z       | z | RT    | Fraction | Scan    | Source File      | Area Roast Ara h 6 | #Feature | #Feature Roast Ara h 6 | Start | End | PTM           | AScore                   | Found By |
|----------------------------------|------|--------|-----------|--------|------|-----------|---|-------|----------|---------|------------------|--------------------|----------|------------------------|-------|-----|---------------|--------------------------|----------|
| R.IPSGFISYILNR.H                 | N    | 116.76 | 1378.7609 | 12     | 1.0  | 690.3884  | 2 | 36.77 | 4        | F4:1833 | OB5942 H6 Ro.raw | 4.949E5            | 3        | 3                      | 266   | 277 |               |                          | PEAKS DB |
| K.SFNLDEGHALR.I                  | N    | 105.18 | 1257.6101 | 11     | 0.5  | 629.8126  | 2 | 28.96 | 5        | F5:1378 | OB5943 H6 Ro.raw | 6.7733E4           | 3        | 3                      | 255   | 265 |               |                          | PEAKS DB |
| R.DQSSYLQGFSR.N                  | N    | 104.35 | 1286.5891 | 11     | 0.5  | 644.3021  | 2 | 30.70 | 6        | F6:1482 | OB5944 H6 Ro.raw | 7.4069E4           | 3        | 3                      | 308   | 318 |               |                          | PEAKS DB |
| K.ISMPVNTPGQFEDFFPASSR.D         | N    | 100.55 | 2226.0415 | 20     | 2.5  | 1114.0308 | 2 | 35.60 | 4        | F4:1757 | OB5942 H6 Ro.raw | 1.7538E5           | 3        | 3                      | 288   | 307 |               |                          | PEAKS DB |
| R.VLLEENAGGEQEER.G               | N    | 100.30 | 1571.7427 | 14     | 0.7  | 786.8792  | 2 | 26.60 | 4        | F4:1237 | OB5942 H6 Ro.raw | 6.3383E3           | 1        | 1                      | 335   | 348 |               |                          | PEAKS DB |
| K.ISM(+15.99)PVNTPGQFEDFFPASSR.D | N    | 85.41  | 2242.0364 | 20     | 2.1  | 1122.0278 | 2 | 34.54 | 5        | F5:1702 | OB5943 H6 Ro.raw | 2.1861E4           | 2        | 2                      | 288   | 307 | Oxidation (M) | M3:Oxidation (M):1000.00 | PEAKS DB |
| R.NNPFYFPSRR.F                   | N    | 79.01  | 1296.6364 | 10     | 1.1  | 649.3262  | 2 | 30.07 | 5        | F5:1443 | OB5943 H6 Ro.raw | 9.0774E4           | 3        | 3                      | 172   | 181 |               |                          | PEAKS DB |
| R.NNPFYFPSR.R                    | N    | 78.65  | 1140.5352 | 9      | 1.8  | 571.2759  | 2 | 31.84 | 5        | F5:1546 | OB5943 H6 Ro.raw | 5.7869E3           | 2        | 2                      | 172   | 180 |               |                          | PEAKS DB |
| R.NTLEAAFNAEFNEIR.R              | N    | 78.54  | 1737.8322 | 15     | 0.3  | 869.9236  | 2 | 35.52 | 4        | F4:1762 | OB5942 H6 Ro.raw | 1.2135E3           | 1        | 1                      | 319   | 333 |               |                          | PEAKS DB |
| R.IFLAGDKDNVIDQIEK.Q             | N    | 78.42  | 1816.9570 | 16     | -0.1 | 909.4857  | 2 | 33.42 | 5        | F5:1643 | OB5943 H6 Ro.raw | 2.878E5            | 6        | 6                      | 541   | 556 |               |                          | PEAKS DB |

| Peptide                                           | Uniq | -10lgP | Mass      | Length | ppm  | m/z       | z | RT    | Fraction | Scan    | Source File      | Area Roast Ara h 6 | #Feature | #Feature Roast Ara h 6 | Start | End | PTM                  | AScore                                                                                                        | Found By  |
|---------------------------------------------------|------|--------|-----------|--------|------|-----------|---|-------|----------|---------|------------------|--------------------|----------|------------------------|-------|-----|----------------------|---------------------------------------------------------------------------------------------------------------|-----------|
| R.IVQIEAKPNTLVLPK.H                               | Y    | 77.37  | 1662.0079 | 15     | 2.9  | 832.0137  | 2 | 30.14 | 4        | F4:1444 | OB5942 H6 Ro.raw | 6.3611E4           | 3        | 3                      | 214   | 228 |                      |                                                                                                               | PEAKS DB  |
| K.SFNLDEGHALRIPSGFISYILNR.H                       | N    | 64.24  | 2618.3604 | 23     | 0.8  | 873.7948  | 3 | 38.22 | 4        | F4:1918 | OB5942 H6 Ro.raw | 1.6862E4           | 1        | 1                      | 255   | 277 |                      |                                                                                                               | PEAKS DB  |
| R.NTLEAAFNAAFNEIRR.V                              | N    | 54.71  | 1893.9332 | 16     | -2.3 | 632.3169  | 3 | 34.83 | 5        | F5:1724 | OB5943 H6 Ro.raw | 4.2865E5           | 5        | 5                      | 319   | 334 |                      |                                                                                                               | PEAKS DB  |
| K.DLAFPGSGEQVEK.L                                 | N    | 54.25  | 1375.6619 | 13     | 0.6  | 688.8386  | 2 | 30.14 | 4        | F4:1453 | OB5942 H6 Ro.raw | 1.9909E4           | 2        | 2                      | 560   | 572 |                      |                                                                                                               | PEAKS DB  |
| K.HADADNILVIQQGQATVTVANGNNRK.S                    | N    | 53.99  | 2746.4111 | 26     | 1.5  | 916.4790  | 3 | 30.13 | 5        | F5:1446 | OB5943 H6 Ro.raw | 0                  | 0        | 0                      | 229   | 254 |                      |                                                                                                               | PEAKS DB  |
| K.KGSEEEGDITNPINLREGPDLSNNFGK.L                   | Y    | 49.97  | 3058.4478 | 28     | 4.0  | 1020.4939 | 3 | 30.91 | 4        | F4:1493 | OB5942 H6 Ro.raw | 0                  | 0        | 0                      | 386   | 413 |                      |                                                                                                               | PEAKS DB  |
| R.C(+57.02)LQS(-18.01)C(+57.02)Q(+.98)QEPDDLKQK.A | N    | 47.12  | 1858.8190 | 15     | -0.1 | 930.4167  | 2 | 28.47 | 4        | F4:1350 | OB5942 H6 Ro.raw | 0                  | 0        | 0                      | 42    | 56  | Carbamidomethylation | C1:Carbamidomethylation:1000.00;S4:Dehydration:39.55;C5:Carbamidomethylation:1000.00;Q6:Deamidation (NQ):0.00 | PEAKS PTM |
| K.HADADNILVIQQGQATVTVANGN(+.98)NRK.S              | N    | 34.54  | 2747.3950 | 26     | 2.3  | 916.8077  | 3 | 29.76 | 4        | F4:1422 | OB5942 H6 Ro.raw | 8.5956E3           | 1        | 1                      | 229   | 254 |                      | N23:Deamidation (NQ):0.00                                                                                     | PEAKS DB  |
| K.HADADNILVIQQGQATVTVAN(+.98)GNNRK.S              | N    | 32.47  | 2747.3950 | 26     | 1.1  | 687.8568  | 4 | 30.07 | 5        | F5:1448 | OB5943 H6 Ro.raw | 2.5891E3           | 1        | 1                      | 229   | 254 |                      | N21:Deamidation (NQ):0.00                                                                                     | PEAKS DB  |
| R.IPSGFISYILNRHDNQNL.R.V                          | N    | 31.95  | 2256.1763 | 19     | 2.8  | 753.0681  | 3 | 34.64 | 4        | F4:1759 | OB5942 H6 Ro.raw | 5.949E4            | 1        | 1                      | 266   | 284 |                      |                                                                                                               | PEAKS DB  |
| total 20 peptides                                 |      |        |           |        |      |           |   |       |          |         |                  |                    |          |                        |       |     |                      |                                                                                                               |           |

sp|P43237|ALL11\_ARAHY

[back to list](#)

| [Protein Coverage](#) | [Supporting Peptides](#) |

Protein Coverage:

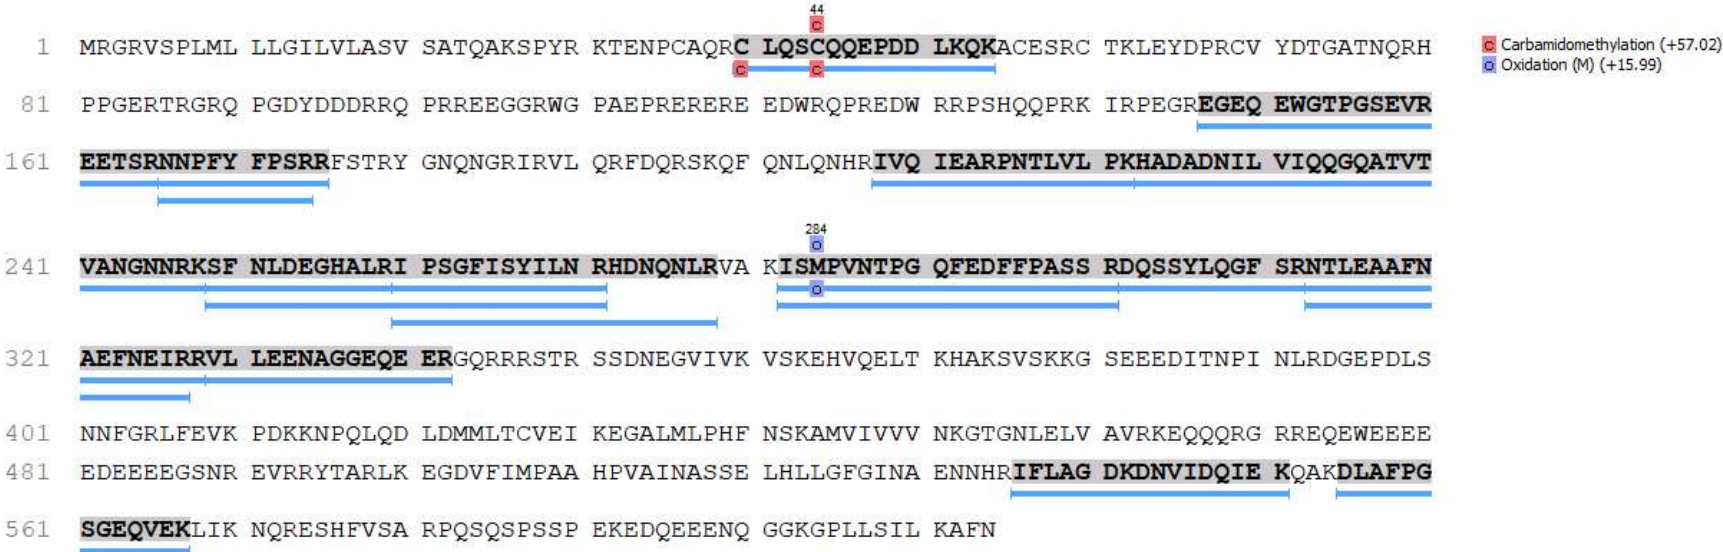

Supporting Peptides:

| Peptide                          | Uniq | -10lgP | Mass      | Length | ppm  | m/z       | z | RT    | Fraction | Scan    | Source File      | Area Roast Ara h 6 | #Feature | #Feature Roast Ara h 6 | Start | End | PTM           | AScore                   | Found By |
|----------------------------------|------|--------|-----------|--------|------|-----------|---|-------|----------|---------|------------------|--------------------|----------|------------------------|-------|-----|---------------|--------------------------|----------|
| R.IPSGFISYILNR.H                 | N    | 116.76 | 1378.7609 | 12     | 1.0  | 690.3884  | 2 | 36.77 | 4        | F4:1833 | OB5942 H6 Ro.raw | 4.949E5            | 3        | 3                      | 260   | 271 |               |                          | PEAKS DB |
| K.SFNLDEGHALR.I                  | N    | 105.18 | 1257.6101 | 11     | 0.5  | 629.8126  | 2 | 28.96 | 5        | F5:1378 | OB5943 H6 Ro.raw | 6.7733E4           | 3        | 3                      | 249   | 259 |               |                          | PEAKS DB |
| R.DQSSYLQGFSR.N                  | N    | 104.35 | 1286.5891 | 11     | 0.5  | 644.3021  | 2 | 30.70 | 6        | F6:1482 | OB5944 H6 Ro.raw | 7.4069E4           | 3        | 3                      | 302   | 312 |               |                          | PEAKS DB |
| K.ISMPVNTPGQFEDFFPASSR.D         | N    | 100.55 | 2226.0415 | 20     | 2.5  | 1114.0308 | 2 | 35.60 | 4        | F4:1757 | OB5942 H6 Ro.raw | 1.7538E5           | 3        | 3                      | 282   | 301 |               |                          | PEAKS DB |
| R.VLLEENAGGEQEER.G               | N    | 100.30 | 1571.7427 | 14     | 0.7  | 786.8792  | 2 | 26.60 | 4        | F4:1237 | OB5942 H6 Ro.raw | 6.3383E3           | 1        | 1                      | 329   | 342 |               |                          | PEAKS DB |
| K.ISM(+15.99)PVNTPGQFEDFFPASSR.D | N    | 85.41  | 2242.0364 | 20     | 2.1  | 1122.0278 | 2 | 34.54 | 5        | F5:1702 | OB5943 H6 Ro.raw | 2.1861E4           | 2        | 2                      | 282   | 301 | Oxidation (M) | M3:Oxidation (M):1000.00 | PEAKS DB |
| R.NNPFYFPSRR.F                   | N    | 79.01  | 1296.6364 | 10     | 1.1  | 649.3262  | 2 | 30.07 | 5        | F5:1443 | OB5943 H6 Ro.raw | 9.0774E4           | 3        | 3                      | 166   | 175 |               |                          | PEAKS DB |
| R.NNPFYFPSR.R                    | N    | 78.65  | 1140.5352 | 9      | 1.8  | 571.2759  | 2 | 31.84 | 5        | F5:1546 | OB5943 H6 Ro.raw | 5.7869E3           | 2        | 2                      | 166   | 174 |               |                          | PEAKS DB |
| R.NTLEAAFAEFNEIR.R               | N    | 78.54  | 1737.8322 | 15     | 0.3  | 869.9236  | 2 | 35.52 | 4        | F4:1762 | OB5942 H6 Ro.raw | 1.2135E3           | 1        | 1                      | 313   | 327 |               |                          | PEAKS DB |
| R.IFLAGDKDNVIDQIEK.Q             | N    | 78.42  | 1816.9570 | 16     | -0.1 | 909.4857  | 2 | 33.42 | 5        | F5:1643 | OB5943 H6 Ro.raw | 2.878E5            | 6        | 6                      | 536   | 551 |               |                          | PEAKS DB |

| Peptide                                           | Uniq | -10lgP | Mass      | Length | ppm  | m/z      | z | RT    | Fraction | Scan    | Source File      | Area Roast Ara h 6 | #Feature | #Feature Roast Ara h 6 | Start | End | PTM                  | AScore                                                                                                        | Found By  |
|---------------------------------------------------|------|--------|-----------|--------|------|----------|---|-------|----------|---------|------------------|--------------------|----------|------------------------|-------|-----|----------------------|---------------------------------------------------------------------------------------------------------------|-----------|
| R.IVQIEARPNTLVLPK.H                               | Y    | 67.70  | 1690.0140 | 15     | 2.0  | 846.0160 | 2 | 30.33 | 4        | F4:1460 | OB5942 H6 Ro.raw | 4.0157E4           | 2        | 2                      | 208   | 222 |                      |                                                                                                               | PEAKS DB  |
| K.SFNLDEGHALRIPSGFISYILNR.H                       | N    | 64.24  | 2618.3604 | 23     | 0.8  | 873.7948 | 3 | 38.22 | 4        | F4:1918 | OB5942 H6 Ro.raw | 1.6862E4           | 1        | 1                      | 249   | 271 |                      |                                                                                                               | PEAKS DB  |
| R.NTLEAAFNAAFNEIRR.V                              | N    | 54.71  | 1893.9332 | 16     | -2.3 | 632.3169 | 3 | 34.83 | 5        | F5:1724 | OB5943 H6 Ro.raw | 4.2865E5           | 5        | 5                      | 313   | 328 |                      |                                                                                                               | PEAKS DB  |
| K.DLAFPGSGEQVEK.L                                 | N    | 54.25  | 1375.6619 | 13     | 0.6  | 688.8386 | 2 | 30.14 | 4        | F4:1453 | OB5942 H6 Ro.raw | 1.9909E4           | 2        | 2                      | 555   | 567 |                      |                                                                                                               | PEAKS DB  |
| K.HADADNILVIQQGQATVTVANGNNRK.S                    | N    | 53.99  | 2746.4111 | 26     | 1.5  | 916.4790 | 3 | 30.13 | 5        | F5:1446 | OB5943 H6 Ro.raw | 0                  | 0        | 0                      | 223   | 248 |                      |                                                                                                               | PEAKS DB  |
| R.C(+57.02)LQS(-18.01)C(+57.02)Q(+.98)QEPDDLKQK.A | N    | 47.12  | 1858.8190 | 15     | -0.1 | 930.4167 | 2 | 28.47 | 4        | F4:1350 | OB5942 H6 Ro.raw | 0                  | 0        | 0                      | 40    | 54  | Carbamidomethylation | C1:Carbamidomethylation:1000.00;S4:Dehydration:39.55;C5:Carbamidomethylation:1000.00;Q6:Deamidation (NQ):0.00 | PEAKS PTM |
| R.EGEQEWGTPGSEVREETS.R                            | Y    | 38.79  | 2161.9512 | 19     | 3.5  | 721.6602 | 3 | 28.10 | 4        | F4:1331 | OB5942 H6 Ro.raw | 2.9689E3           | 1        | 1                      | 147   | 165 |                      |                                                                                                               | PEAKS DB  |
| K.HADADNILVIQQGQATVTVANGN(+.98)NRK.S              | N    | 34.54  | 2747.3950 | 26     | 2.3  | 916.8077 | 3 | 29.76 | 4        | F4:1422 | OB5942 H6 Ro.raw | 8.5956E3           | 1        | 1                      | 223   | 248 |                      | N23:Deamidation (NQ):0.00                                                                                     | PEAKS DB  |
| K.HADADNILVIQQGQATVTVAN(+.98)GNNRK.S              | N    | 32.47  | 2747.3950 | 26     | 1.1  | 687.8568 | 4 | 30.07 | 5        | F5:1448 | OB5943 H6 Ro.raw | 2.5891E3           | 1        | 1                      | 223   | 248 |                      | N21:Deamidation (NQ):0.00                                                                                     | PEAKS DB  |
| R.IPSGFISYILNRHDNQNL.R                            | N    | 31.95  | 2256.1763 | 19     | 2.8  | 753.0681 | 3 | 34.64 | 4        | F4:1759 | OB5942 H6 Ro.raw | 5.949E4            | 1        | 1                      | 260   | 278 |                      |                                                                                                               | PEAKS DB  |
| total 20 peptides                                 |      |        |           |        |      |          |   |       |          |         |                  |                    |          |                        |       |     |                      |                                                                                                               |           |

B3IXL2|B3IXL2\_ARAHY

[back to list](#)

| [Protein Coverage](#) | [Supporting Peptides](#) |

Protein Coverage:



Supporting Peptides:

| Peptide                          | Uniq | -10lgP | Mass      | Length | ppm  | m/z       | z | RT    | Fraction | Scan    | Source File      | Area Roast Ara h 6 | #Feature | #Feature Roast Ara h 6 | Start | End | PTM           | AScore                   | Found By |
|----------------------------------|------|--------|-----------|--------|------|-----------|---|-------|----------|---------|------------------|--------------------|----------|------------------------|-------|-----|---------------|--------------------------|----------|
| R.IPSGFISYILNR.H                 | N    | 116.76 | 1378.7609 | 12     | 1.0  | 690.3884  | 2 | 36.77 | 4        | F4:1833 | OB5942 H6 Ro.raw | 4.949E5            | 3        | 3                      | 260   | 271 |               |                          | PEAKS DB |
| K.SFNLDEGHALR.I                  | N    | 105.18 | 1257.6101 | 11     | 0.5  | 629.8126  | 2 | 28.96 | 5        | F5:1378 | OB5943 H6 Ro.raw | 6.7733E4           | 3        | 3                      | 249   | 259 |               |                          | PEAKS DB |
| R.DQSSYLQGFSR.N                  | N    | 104.35 | 1286.5891 | 11     | 0.5  | 644.3021  | 2 | 30.70 | 6        | F6:1482 | OB5944 H6 Ro.raw | 7.4069E4           | 3        | 3                      | 302   | 312 |               |                          | PEAKS DB |
| K.ISMPVNTPGQFEDFFPASSR.D         | N    | 100.55 | 2226.0415 | 20     | 2.5  | 1114.0308 | 2 | 35.60 | 4        | F4:1757 | OB5942 H6 Ro.raw | 1.7538E5           | 3        | 3                      | 282   | 301 |               |                          | PEAKS DB |
| R.VLLEENAGGEQEER.G               | N    | 100.30 | 1571.7427 | 14     | 0.7  | 786.8792  | 2 | 26.60 | 4        | F4:1237 | OB5942 H6 Ro.raw | 6.3383E3           | 1        | 1                      | 329   | 342 |               |                          | PEAKS DB |
| K.ISM(+15.99)PVNTPGQFEDFFPASSR.D | N    | 85.41  | 2242.0364 | 20     | 2.1  | 1122.0278 | 2 | 34.54 | 5        | F5:1702 | OB5943 H6 Ro.raw | 2.1861E4           | 2        | 2                      | 282   | 301 | Oxidation (M) | M3:Oxidation (M):1000.00 | PEAKS DB |
| R.NNPFYFPSRR.F                   | N    | 79.01  | 1296.6364 | 10     | 1.1  | 649.3262  | 2 | 30.07 | 5        | F5:1443 | OB5943 H6 Ro.raw | 9.0774E4           | 3        | 3                      | 166   | 175 |               |                          | PEAKS DB |
| R.NNPFYFPSR.R                    | N    | 78.65  | 1140.5352 | 9      | 1.8  | 571.2759  | 2 | 31.84 | 5        | F5:1546 | OB5943 H6 Ro.raw | 5.7869E3           | 2        | 2                      | 166   | 174 |               |                          | PEAKS DB |
| R.NTLEAAFAEFNEIR.R               | N    | 78.54  | 1737.8322 | 15     | 0.3  | 869.9236  | 2 | 35.52 | 4        | F4:1762 | OB5942 H6 Ro.raw | 1.2135E3           | 1        | 1                      | 313   | 327 |               |                          | PEAKS DB |
| R.IFLAGDKDNVIDQIEK.Q             | N    | 78.42  | 1816.9570 | 16     | -0.1 | 909.4857  | 2 | 33.42 | 5        | F5:1643 | OB5943 H6 Ro.raw | 2.878E5            | 6        | 6                      | 536   | 551 |               |                          | PEAKS DB |

| Peptide                                           | Uniq | -10lgP | Mass      | Length | ppm  | m/z      | z | RT    | Fraction | Scan    | Source File      | Area Roast Ara h 6 | #Feature | #Feature Roast Ara h 6 | Start | End | PTM                  | AScore                                                                                                        | Found By  |
|---------------------------------------------------|------|--------|-----------|--------|------|----------|---|-------|----------|---------|------------------|--------------------|----------|------------------------|-------|-----|----------------------|---------------------------------------------------------------------------------------------------------------|-----------|
| R.IVQIEARPNTLVLPK.H                               | Y    | 67.70  | 1690.0140 | 15     | 2.0  | 846.0160 | 2 | 30.33 | 4        | F4:1460 | OB5942 H6 Ro.raw | 4.0157E4           | 2        | 2                      | 208   | 222 |                      |                                                                                                               | PEAKS DB  |
| K.SFNLDEGHALRIPSGFISYILNR.H                       | N    | 64.24  | 2618.3604 | 23     | 0.8  | 873.7948 | 3 | 38.22 | 4        | F4:1918 | OB5942 H6 Ro.raw | 1.6862E4           | 1        | 1                      | 249   | 271 |                      |                                                                                                               | PEAKS DB  |
| R.NTLEAAFNAAFNEIRR.V                              | N    | 54.71  | 1893.9332 | 16     | -2.3 | 632.3169 | 3 | 34.83 | 5        | F5:1724 | OB5943 H6 Ro.raw | 4.2865E5           | 5        | 5                      | 313   | 328 |                      |                                                                                                               | PEAKS DB  |
| K.DLAFPGSGEQVEK.L                                 | N    | 54.25  | 1375.6619 | 13     | 0.6  | 688.8386 | 2 | 30.14 | 4        | F4:1453 | OB5942 H6 Ro.raw | 1.9909E4           | 2        | 2                      | 555   | 567 |                      |                                                                                                               | PEAKS DB  |
| K.HADADNILVIQQGQATVTVANGNNRK.S                    | N    | 53.99  | 2746.4111 | 26     | 1.5  | 916.4790 | 3 | 30.13 | 5        | F5:1446 | OB5943 H6 Ro.raw | 0                  | 0        | 0                      | 223   | 248 |                      |                                                                                                               | PEAKS DB  |
| R.C(+57.02)LQS(-18.01)C(+57.02)Q(+.98)QEPDDLKQK.A | N    | 47.12  | 1858.8190 | 15     | -0.1 | 930.4167 | 2 | 28.47 | 4        | F4:1350 | OB5942 H6 Ro.raw | 0                  | 0        | 0                      | 40    | 54  | Carbamidomethylation | C1:Carbamidomethylation:1000.00;S4:Dehydration:39.55;C5:Carbamidomethylation:1000.00;Q6:Deamidation (NQ):0.00 | PEAKS PTM |
| R.EGEQEWGTPGSEVREETS.R.N                          | Y    | 38.79  | 2161.9512 | 19     | 3.5  | 721.6602 | 3 | 28.10 | 4        | F4:1331 | OB5942 H6 Ro.raw | 2.9689E3           | 1        | 1                      | 147   | 165 |                      |                                                                                                               | PEAKS DB  |
| K.HADADNILVIQQGQATVTVANGN(+.98)NRK.S              | N    | 34.54  | 2747.3950 | 26     | 2.3  | 916.8077 | 3 | 29.76 | 4        | F4:1422 | OB5942 H6 Ro.raw | 8.5956E3           | 1        | 1                      | 223   | 248 |                      | N23:Deamidation (NQ):0.00                                                                                     | PEAKS DB  |
| K.HADADNILVIQQGQATVTVAN(+.98)GNNRK.S              | N    | 32.47  | 2747.3950 | 26     | 1.1  | 687.8568 | 4 | 30.07 | 5        | F5:1448 | OB5943 H6 Ro.raw | 2.5891E3           | 1        | 1                      | 223   | 248 |                      | N21:Deamidation (NQ):0.00                                                                                     | PEAKS DB  |
| R.IPSGFISYILNRHDNQNL.R.V                          | N    | 31.95  | 2256.1763 | 19     | 2.8  | 753.0681 | 3 | 34.64 | 4        | F4:1759 | OB5942 H6 Ro.raw | 5.949E4            | 1        | 1                      | 260   | 278 |                      |                                                                                                               | PEAKS DB  |
| total 20 peptides                                 |      |        |           |        |      |          |   |       |          |         |                  |                    |          |                        |       |     |                      |                                                                                                               |           |

Q6PSU3|Q6PSU3\_ARAHY

[back to list](#)

| [Protein Coverage](#) | [Supporting Peptides](#) |

Protein Coverage:



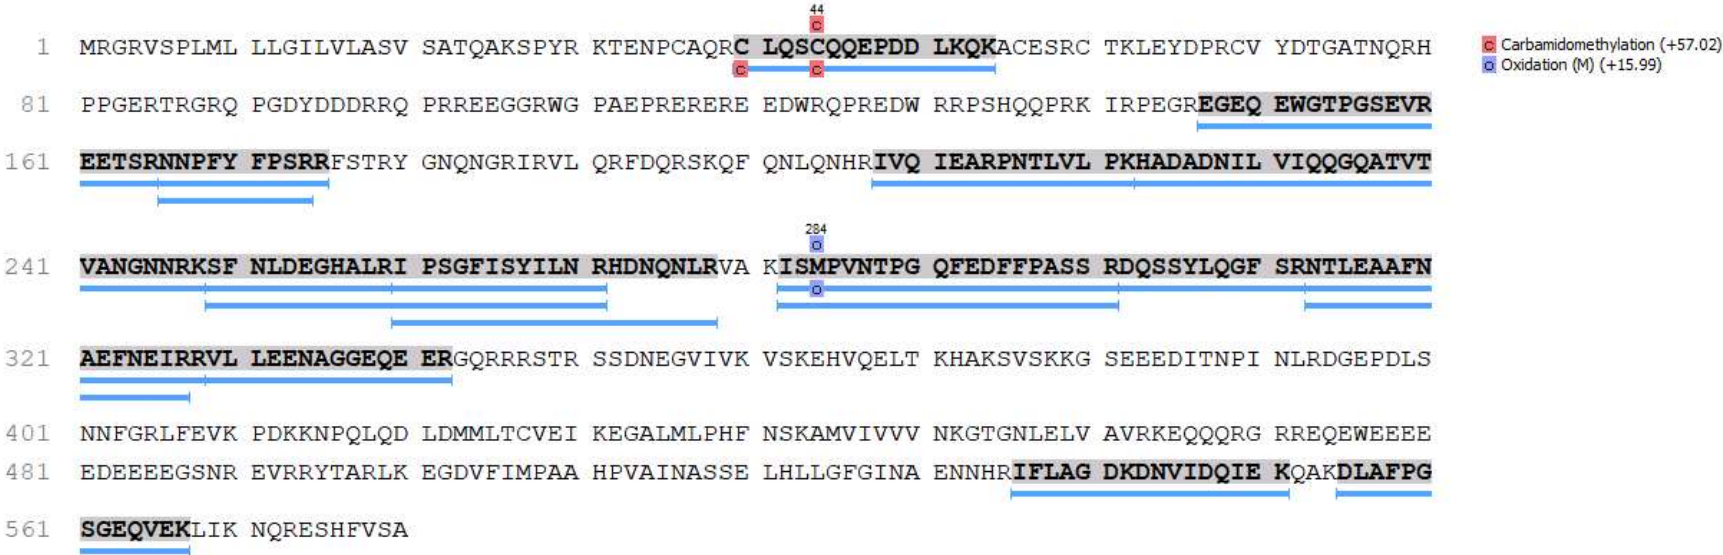

Supporting Peptides:

| Peptide                          | Uniq | -10lgP | Mass      | Length | ppm  | m/z       | z | RT    | Fraction | Scan    | Source File      | Area Roast Ara h 6 | #Feature | #Feature Roast Ara h 6 | Start | End | PTM           | AScore                   | Found By |
|----------------------------------|------|--------|-----------|--------|------|-----------|---|-------|----------|---------|------------------|--------------------|----------|------------------------|-------|-----|---------------|--------------------------|----------|
| R.IPSGFISYILNR.H                 | N    | 116.76 | 1378.7609 | 12     | 1.0  | 690.3884  | 2 | 36.77 | 4        | F4:1833 | OB5942 H6 Ro.raw | 4.949E5            | 3        | 3                      | 260   | 271 |               |                          | PEAKS DB |
| K.SFNLDEGHALR.I                  | N    | 105.18 | 1257.6101 | 11     | 0.5  | 629.8126  | 2 | 28.96 | 5        | F5:1378 | OB5943 H6 Ro.raw | 6.7733E4           | 3        | 3                      | 249   | 259 |               |                          | PEAKS DB |
| R.DQSSYLQGFSR.N                  | N    | 104.35 | 1286.5891 | 11     | 0.5  | 644.3021  | 2 | 30.70 | 6        | F6:1482 | OB5944 H6 Ro.raw | 7.4069E4           | 3        | 3                      | 302   | 312 |               |                          | PEAKS DB |
| K.ISMPVNTPGQFEDFFPASSR.D         | N    | 100.55 | 2226.0415 | 20     | 2.5  | 1114.0308 | 2 | 35.60 | 4        | F4:1757 | OB5942 H6 Ro.raw | 1.7538E5           | 3        | 3                      | 282   | 301 |               |                          | PEAKS DB |
| R.VLLEENAGGEQEER.G               | N    | 100.30 | 1571.7427 | 14     | 0.7  | 786.8792  | 2 | 26.60 | 4        | F4:1237 | OB5942 H6 Ro.raw | 6.3383E3           | 1        | 1                      | 329   | 342 |               |                          | PEAKS DB |
| K.ISM(+15.99)PVNTPGQFEDFFPASSR.D | N    | 85.41  | 2242.0364 | 20     | 2.1  | 1122.0278 | 2 | 34.54 | 5        | F5:1702 | OB5943 H6 Ro.raw | 2.1861E4           | 2        | 2                      | 282   | 301 | Oxidation (M) | M3:Oxidation (M):1000.00 | PEAKS DB |
| R.NNPFYFPSRR.F                   | N    | 79.01  | 1296.6364 | 10     | 1.1  | 649.3262  | 2 | 30.07 | 5        | F5:1443 | OB5943 H6 Ro.raw | 9.0774E4           | 3        | 3                      | 166   | 175 |               |                          | PEAKS DB |
| R.NNPFYFPSR.R                    | N    | 78.65  | 1140.5352 | 9      | 1.8  | 571.2759  | 2 | 31.84 | 5        | F5:1546 | OB5943 H6 Ro.raw | 5.7869E3           | 2        | 2                      | 166   | 174 |               |                          | PEAKS DB |
| R.NTLEAAFAEFNEIR.R               | N    | 78.54  | 1737.8322 | 15     | 0.3  | 869.9236  | 2 | 35.52 | 4        | F4:1762 | OB5942 H6 Ro.raw | 1.2135E3           | 1        | 1                      | 313   | 327 |               |                          | PEAKS DB |
| R.IFLAGDKDNVIDQIEK.Q             | N    | 78.42  | 1816.9570 | 16     | -0.1 | 909.4857  | 2 | 33.42 | 5        | F5:1643 | OB5943 H6 Ro.raw | 2.878E5            | 6        | 6                      | 536   | 551 |               |                          | PEAKS DB |

| Peptide                                           | Uniq | -10lgP | Mass      | Length | ppm  | m/z      | z | RT    | Fraction | Scan    | Source File      | Area Roast Ara h 6 | #Feature | #Feature Roast Ara h 6 | Start | End | PTM                  | AScore                                                                                                        | Found By  |
|---------------------------------------------------|------|--------|-----------|--------|------|----------|---|-------|----------|---------|------------------|--------------------|----------|------------------------|-------|-----|----------------------|---------------------------------------------------------------------------------------------------------------|-----------|
| R.IVQIEARPNTLVLPK.H                               | Y    | 67.70  | 1690.0140 | 15     | 2.0  | 846.0160 | 2 | 30.33 | 4        | F4:1460 | OB5942 H6 Ro.raw | 4.0157E4           | 2        | 2                      | 208   | 222 |                      |                                                                                                               | PEAKS DB  |
| K.SFNLDEGHALRIPSGFISYILNR.H                       | N    | 64.24  | 2618.3604 | 23     | 0.8  | 873.7948 | 3 | 38.22 | 4        | F4:1918 | OB5942 H6 Ro.raw | 1.6862E4           | 1        | 1                      | 249   | 271 |                      |                                                                                                               | PEAKS DB  |
| R.NTLEAAFNAAFNEIRR.V                              | N    | 54.71  | 1893.9332 | 16     | -2.3 | 632.3169 | 3 | 34.83 | 5        | F5:1724 | OB5943 H6 Ro.raw | 4.2865E5           | 5        | 5                      | 313   | 328 |                      |                                                                                                               | PEAKS DB  |
| K.DLAFPGSGEQVEK.L                                 | N    | 54.25  | 1375.6619 | 13     | 0.6  | 688.8386 | 2 | 30.14 | 4        | F4:1453 | OB5942 H6 Ro.raw | 1.9909E4           | 2        | 2                      | 555   | 567 |                      |                                                                                                               | PEAKS DB  |
| K.HADADNILVIQQGQATVTVANGNNRK.S                    | N    | 53.99  | 2746.4111 | 26     | 1.5  | 916.4790 | 3 | 30.13 | 5        | F5:1446 | OB5943 H6 Ro.raw | 0                  | 0        | 0                      | 223   | 248 |                      |                                                                                                               | PEAKS DB  |
| R.C(+57.02)LQS(-18.01)C(+57.02)Q(+.98)QEPDDLKQK.A | N    | 47.12  | 1858.8190 | 15     | -0.1 | 930.4167 | 2 | 28.47 | 4        | F4:1350 | OB5942 H6 Ro.raw | 0                  | 0        | 0                      | 40    | 54  | Carbamidomethylation | C1:Carbamidomethylation:1000.00;S4:Dehydration:39.55;C5:Carbamidomethylation:1000.00;Q6:Deamidation (NQ):0.00 | PEAKS PTM |
| R.EGEQEWGTPGSEVREETSR.N                           | Y    | 38.79  | 2161.9512 | 19     | 3.5  | 721.6602 | 3 | 28.10 | 4        | F4:1331 | OB5942 H6 Ro.raw | 2.9689E3           | 1        | 1                      | 147   | 165 |                      |                                                                                                               | PEAKS DB  |
| K.HADADNILVIQQGQATVTVANGN(+.98)NRK.S              | N    | 34.54  | 2747.3950 | 26     | 2.3  | 916.8077 | 3 | 29.76 | 4        | F4:1422 | OB5942 H6 Ro.raw | 8.5956E3           | 1        | 1                      | 223   | 248 |                      | N23:Deamidation (NQ):0.00                                                                                     | PEAKS DB  |
| K.HADADNILVIQQGQATVTVAN(+.98)GNNRK.S              | N    | 32.47  | 2747.3950 | 26     | 1.1  | 687.8568 | 4 | 30.07 | 5        | F5:1448 | OB5943 H6 Ro.raw | 2.5891E3           | 1        | 1                      | 223   | 248 |                      | N21:Deamidation (NQ):0.00                                                                                     | PEAKS DB  |
| R.IPSGFISYILNRHDNQNL.R.V                          | N    | 31.95  | 2256.1763 | 19     | 2.8  | 753.0681 | 3 | 34.64 | 4        | F4:1759 | OB5942 H6 Ro.raw | 5.949E4            | 1        | 1                      | 260   | 278 |                      |                                                                                                               | PEAKS DB  |
| total 20 peptides                                 |      |        |           |        |      |          |   |       |          |         |                  |                    |          |                        |       |     |                      |                                                                                                               |           |

Q647H1|Q647H1\_ARAHY

back to list

| Protein Coverage | Supporting Peptides |

Protein Coverage:

1

MVIGPFRLSL CVCLVFLTSA CFGTRLEESF NECQLDRLNA LTPDNRIESQ GGITETWNSN HPFLRCAGVT LLKRTIFPNG

81

FHLPSYANYP QLIFIAQGNG VFGVSLPGCP VTYEEAESQS REDRRQRIVI KRESEQEQQ QGDSHHKIYH FRQGHLLAIP

161

AGVPYWSFNY GNEPIVAITL LDTSNLDNQL DPSPRRFYLA GNPEEEHPET QQQQPQTRRR HGQHQQDEYG SQGEEEGNNV

241

LSGFSTQLLA HAFGVDEEIA RILQNPEQT KDQIVRVEGG FRDVISPRWG EGKQYEDELE ERQRQPERRD EQGKGYYDYYDD

321

DRRPRHRQDP YREGDEDDRR PRGSRQGQGR GYDDDDRRPG QYEEGEEDDR RPRRSSRPKR QGRRHDDDDR RADEDDRRGY

401

DDDERRPDED DRRGYDDDER RPDDDDRQGY DDDDRRPRWS SRPKGQGRNG VEETLCSPTL VEDIARPSRA DFYNPAAGRI

481

SSANSLTFPI LRWFQLSAEH VLLYRNGIYS PHWNNNANSI IYGLRGEGRI QVVNSQGNV FNGVLREGQI LLVPQNFAVG

561

KQAGNEGFEY VAFKTADRAS PATSSKCLGE SPLMFSSMLL AFEIIKSVLS NTMETRPLWS LLMIPSMGLN VVINLNHNNN

641

AQVDSKNNDG SRLWWPSSII IK

Deamidation (NQ) (+0.98)

Diethylation (+56.06)



Supporting Peptides:

| Peptide                             | Uniq | -10lgP | Mass      | Length | ppm | m/z      | z | RT    | Fraction | Scan    | Source File         | Area Roast<br>Ara h 6 | #Feature | #Feature Roast<br>Ara h 6 | Start | End | PTM                 | AScore                                                  | Found By     |
|-------------------------------------|------|--------|-----------|--------|-----|----------|---|-------|----------|---------|---------------------|-----------------------|----------|---------------------------|-------|-----|---------------------|---------------------------------------------------------|--------------|
| R.IQVVNSQGNVFNGLR.E                 | Y    | 133.65 | 1813.9799 | 17     | 1.1 | 907.9982 | 2 | 32.86 | 5        | F5:1608 | OB5943 H6<br>Ro.raw | 4.365E4               | 3        | 3                         | 530   | 546 |                     |                                                         | PEAKS<br>DB  |
| R.IQVVNSQGNVFN(+.98)GVLRL.E         | Y    | 123.27 | 1814.9639 | 17     | 0.5 | 908.4896 | 2 | 32.42 | 6        | F6:1586 | OB5944 H6<br>Ro.raw | 0                     | 0        | 0                         | 530   | 546 | Deamidation<br>(NQ) | N13:Deamidation (NQ):77.51                              | PEAKS<br>DB  |
| R.WFQLSAEHLVLR.N                    | Y    | 111.09 | 1660.8726 | 13     | 3.7 | 831.4467 | 2 | 35.21 | 4        | F4:1749 | OB5942 H6<br>Ro.raw | 7.6112E4              | 5        | 5                         | 493   | 505 |                     |                                                         | PEAKS<br>DB  |
| R.ISSANSLTFPIRL.W                   | Y    | 99.72  | 1417.7928 | 13     | 1.3 | 709.9046 | 2 | 34.07 | 4        | F4:1680 | OB5942 H6<br>Ro.raw | 9.684E4               | 3        | 3                         | 480   | 492 |                     |                                                         | PEAKS<br>DB  |
| R.EGQILLVPQNFVAVGK.Q                | Y    | 95.83  | 1611.8984 | 15     | 1.4 | 806.9576 | 2 | 34.05 | 6        | F6:1681 | OB5944 H6<br>Ro.raw | 1.1916E5              | 3        | 3                         | 547   | 561 |                     |                                                         | PEAKS<br>DB  |
| R.IQ(+.98)VVNSQGNVFNGLR.E           | Y    | 81.15  | 1814.9639 | 17     | 2.4 | 908.4914 | 2 | 32.79 | 5        | F5:1603 | OB5943 H6<br>Ro.raw | 0                     | 0        | 0                         | 530   | 546 |                     | Q2:Deamidation (NQ):37.78                               | PEAKS<br>DB  |
| R.ADFYNPAAGR.I                      | Y    | 75.66  | 1080.4988 | 10     | 0.7 | 541.2570 | 2 | 27.93 | 6        | F6:1328 | OB5944 H6<br>Ro.raw | 2.9033E4              | 3        | 3                         | 470   | 479 |                     |                                                         | PEAKS<br>DB  |
| K.QAGNEGFEYVAFK.T                   | Y    | 71.35  | 1458.6779 | 13     | 1.7 | 730.3474 | 2 | 32.21 | 5        | F5:1569 | OB5943 H6<br>Ro.raw | 0                     | 0        | 0                         | 562   | 574 |                     |                                                         | PEAKS<br>DB  |
| R.IQVVN(+.98)SQGNVFNGLR.E           | Y    | 49.07  | 1814.9639 | 17     | 1.6 | 908.4907 | 2 | 33.23 | 6        | F6:1633 | OB5944 H6<br>Ro.raw | 0                     | 0        | 0                         | 530   | 546 |                     | N5:Deamidation (NQ):0.00                                | PEAKS<br>DB  |
| R.N(+.98)GIYSPHWNNNANSIYGLR.G       | Y    | 46.60  | 2303.1084 | 20     | 4.1 | 768.7132 | 3 | 34.70 | 6        | F6:1718 | OB5944 H6<br>Ro.raw | 0                     | 0        | 0                         | 506   | 525 |                     | N1:Deamidation (NQ):32.94                               | PEAKS<br>DB  |
| R.EGQILLVPQNFVAVGK(+56.06).Q        | Y    | 41.08  | 1667.9609 | 15     | 1.4 | 834.9890 | 2 | 34.76 | 5        | F5:1717 | OB5943 H6<br>Ro.raw | 0                     | 0        | 0                         | 547   | 561 | Diethylation        | K15:Diethylation:88.07                                  | PEAKS<br>PTM |
| R.N(+.98)GIYSPHWNNNAN(+.98)SIYGLR.G | Y    | 35.88  | 2304.0923 | 20     | 8.5 | 769.0446 | 3 | 34.92 | 5        | F5:1731 | OB5943 H6<br>Ro.raw | 3.732E3               | 1        | 1                         | 506   | 525 |                     | N1:Deamidation (NQ):17.32;N13:D<br>eamidation (NQ):6.63 | PEAKS<br>DB  |
| R.NGIYSPHWNNNANSIYGLR.G             | Y    | 34.13  | 2302.1243 | 20     | 2.0 | 768.3835 | 3 | 34.36 | 4        | F4:1695 | OB5942 H6<br>Ro.raw | 0                     | 0        | 0                         | 506   | 525 |                     |                                                         | PEAKS<br>DB  |
| total 13 peptides                   |      |        |           |        |     |          |   |       |          |         |                     |                       |          |                           |       |     |                     |                                                         |              |

sp|Q647H2|AHY3\_ARAHY

[back to list](#)

| [Protein Coverage](#) | [Supporting Peptides](#) |

Protein Coverage:

1

MAKLLALSVC FCFLVLGASS VTFRQQGEEN ECQFQRLNAQ RPDNC

IESEG GYIETWNPNN QEFQCAGVAL SRFVLRRNAL

81

RRPFYSNAPQ EIFIYQGSYG FGLIFPGCPG TFEETIQGSE QFQRPSRHFQ GQDQSQRPDL THQKVHGFRE GDLIAVPHGV

161

AFWIYNDQDT DVVAISVLHT NSLHNQLDQF PRRFNLAGKQ EQEFLRYQQR SGRQSPKGEE QEQQENEGG NVFSGFSTEF

241

LSHGFQVNED IVRNLRGENE REEQGAIVTV KGGLSILVPP EWRQSYQQPG RGDKDFNNGI EETICTATVK MNIGKSTSD

321

IYNPQAGSVR TVNELDLPIL NRLGLSAEYG SIHRDAMFVP HYNMNANSMI YALHGGAHVQ VVDCNGNRVF DEELQEQSL

401

VVPQNFAVAA KSQSEHFLYV AFKTNRSASI SNLAGKNSYM WNLPEVVAN SYGLQYEQAR QLKNNNPFTF LVPPQDSQMI

481

RTVA

Carbamidomethylation (+57.02)

Propionamide (+71.04)

Supporting Peptides:

| Peptide          | Uniq | -10lgP | Mass | Length | ppm | m/z | z | RT | Fraction | Scan | Source File | Area Roast<br>Ara h 6 | #Feature | #Feature Roast<br>Ara h 6 | Start | End | PTM | AScore | Found By |
|------------------|------|--------|------|--------|-----|-----|---|----|----------|------|-------------|-----------------------|----------|---------------------------|-------|-----|-----|--------|----------|
| total 9 peptides |      |        |      |        |     |     |   |    |          |      |             |                       |          |                           |       |     |     |        |          |

| Peptide                                 | Uniq | -10lgP | Mass      | Length | ppm  | m/z       | z | RT    | Fraction | Scan    | Source File      | Area Roast<br>Ara h 6 | #Feature | #Feature Roast<br>Ara h 6 | Start | End | PTM                  | AScore                           | Found By  |
|-----------------------------------------|------|--------|-----------|--------|------|-----------|---|-------|----------|---------|------------------|-----------------------|----------|---------------------------|-------|-----|----------------------|----------------------------------|-----------|
| R.TVNELDLPILNR,L                        | Y    | 110.86 | 1395.7721 | 12     | 2.4  | 698.8950  | 2 | 34.26 | 4        | F4:1684 | OB5942 H6 Ro.raw | 5.2986E4              | 3        | 3                         | 331   | 342 |                      |                                  | PEAKS DB  |
| R.LGLSAEYGSiHR,D                        | Y    | 106.40 | 1301.6727 | 12     | 0.9  | 651.8442  | 2 | 29.01 | 5        | F5:1379 | OB5943 H6 Ro.raw | 0                     | 0        | 0                         | 343   | 354 |                      |                                  | PEAKS DB  |
| K.STSADIYNPQAGSVR,T                     | Y    | 93.73  | 1564.7482 | 15     | -0.5 | 783.3810  | 2 | 27.48 | 5        | F5:1285 | OB5943 H6 Ro.raw | 2.0503E4              | 3        | 3                         | 316   | 330 |                      |                                  | PEAKS DB  |
| N.GIEETIC(+57.02)TATVK,M                | N    | 81.04  | 1320.6595 | 12     | -0.1 | 661.3370  | 2 | 29.52 | 5        | F5:1405 | OB5943 H6 Ro.raw | 2.3112E4              | 2        | 2                         | 299   | 310 | Carbamidomethylation | C7:Carbamidomethylation:1000.00  | PEAKS DB  |
| K.NSYMWNLPEDVVANSYGLQYEQAR,Q            | Y    | 74.48  | 2846.2969 | 24     | 4.1  | 1424.1615 | 2 | 37.17 | 5        | F5:1856 | OB5943 H6 Ro.raw | 0                     | 0        | 0                         | 437   | 460 |                      |                                  | PEAKS DB  |
| K.SQSEHFLYVAFK,T                        | Y    | 72.80  | 1454.7194 | 12     | 0.2  | 728.3671  | 2 | 31.98 | 6        | F6:1565 | OB5944 H6 Ro.raw | 2.7176E4              | 3        | 3                         | 412   | 423 |                      |                                  | PEAKS DB  |
| R.VFDEELQEGQLVVPQNFAVAAK,S              | Y    | 47.99  | 2517.2751 | 23     | 4.1  | 1259.6500 | 2 | 35.21 | 5        | F5:1743 | OB5943 H6 Ro.raw | 0                     | 0        | 0                         | 389   | 411 |                      |                                  | PEAKS DB  |
| N.GIEETIC(+71.04)TATVK,M                | N    | 37.92  | 1334.6752 | 12     | 1.9  | 668.3461  | 2 | 29.63 | 6        | F6:1421 | OB5944 H6 Ro.raw | 0                     | 0        | 0                         | 299   | 310 | Propionamide         | C7:Propionamide:1000.00          | PEAKS PTM |
| C.IESEGGYIETWNPNNQEFQC(+57.02)AGVALSR,F | N    | 37.18  | 3068.3933 | 27     | -0.9 | 1023.8041 | 3 | 34.37 | 6        | F6:1699 | OB5944 H6 Ro.raw | 0                     | 0        | 0                         | 46    | 72  | Carbamidomethylation | C20:Carbamidomethylation:1000.00 | PEAKS DB  |
| total 9 peptides                        |      |        |           |        |      |           |   |       |          |         |                  |                       |          |                           |       |     |                      |                                  |           |

Q6IWG5|Q6IWG5\_ARAHY

[back to list](#)

[Protein Coverage](#) | [Supporting Peptides](#)

Protein Coverage:

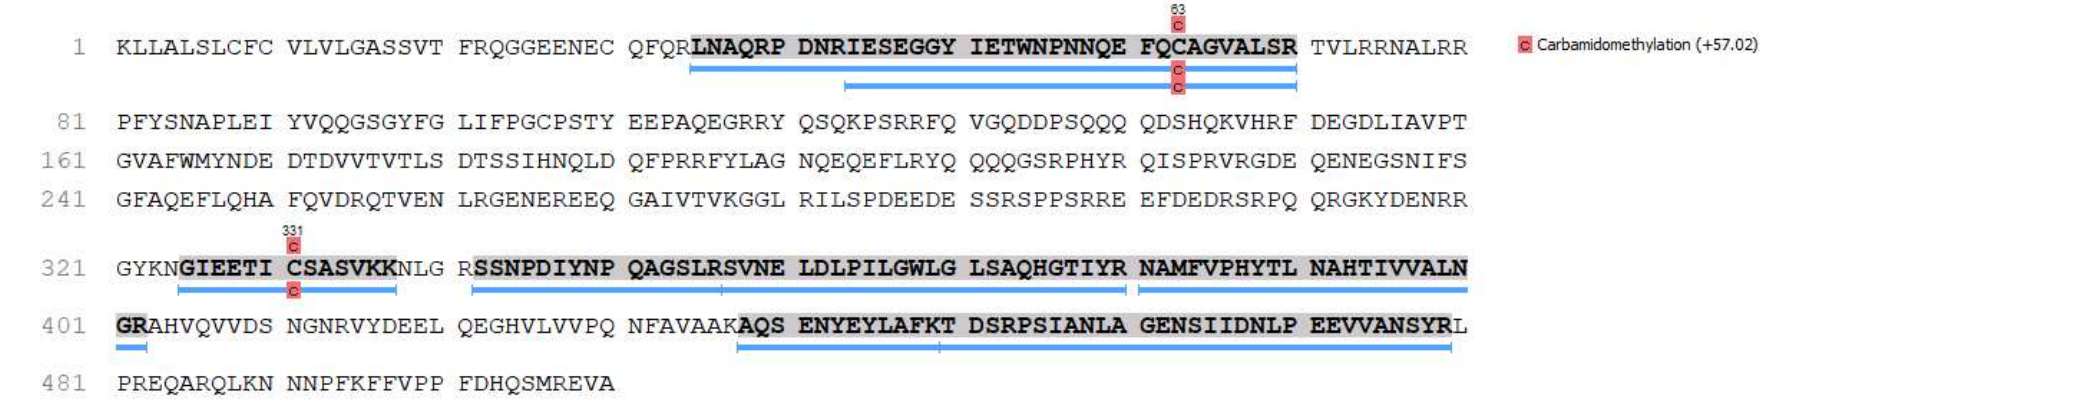

Supporting Peptides:

| Peptide                            | Uniq | -10lgP | Mass      | Length | ppm  | m/z       | z | RT    | Fraction | Scan    | Source File      | Area Roast<br>Ara h 6 | #Feature | #Feature Roast<br>Ara h 6 | Start | End | PTM | AScore | Found By |
|------------------------------------|------|--------|-----------|--------|------|-----------|---|-------|----------|---------|------------------|-----------------------|----------|---------------------------|-------|-----|-----|--------|----------|
| R.SSNPDIYNPQAGSLR,S                | Y    | 107.40 | 1617.7747 | 15     | -0.5 | 809.8942  | 2 | 28.38 | 4        | F4:1346 | OB5942 H6 Ro.raw | 9.5502E4              | 3        | 3                         | 342   | 356 |     |        | PEAKS DB |
| K.AQSENYEYLAFK,T                   | Y    | 104.89 | 1461.6776 | 12     | 1.4  | 731.8471  | 2 | 31.44 | 6        | F6:1523 | OB5944 H6 Ro.raw | 3.7693E4              | 3        | 3                         | 438   | 449 |     |        | PEAKS DB |
| K.TDSRPSIANLAGENSIIDNLPeeVVANSYR,L | Y    | 94.41  | 3243.6006 | 30     | 5.4  | 1082.2133 | 3 | 36.10 | 6        | F6:1801 | OB5944 H6 Ro.raw | 7.4455E4              | 3        | 3                         | 450   | 479 |     |        | PEAKS DB |
| R.SVNELDLPILGWGLSAQHGTIYR,N        | Y    | 70.38  | 2651.4070 | 24     | 4.0  | 1326.7161 | 2 | 39.73 | 6        | F6:2002 | OB5944 H6 Ro.raw | 1.8031E5              | 2        | 2                         | 357   | 380 |     |        | PEAKS DB |

total 8 peptides

| Peptide                                           | Uniq | -10lgP | Mass      | Length | ppm  | m/z       | z | RT    | Fraction | Scan    | Source File      | Area Roast Ara h 6 | #Feature | #Feature Roast Ara h 6 | Start | End | PTM                  | AScore                           | Found By |
|---------------------------------------------------|------|--------|-----------|--------|------|-----------|---|-------|----------|---------|------------------|--------------------|----------|------------------------|-------|-----|----------------------|----------------------------------|----------|
| N.GIEETIC(+57.02)SASVKK.N                         | Y    | 62.45  | 1420.7231 | 13     | 4.5  | 711.3721  | 2 | 27.29 | 5        | F5:1274 | OB5943 H6 Ro.raw | 6.0887E3           | 1        | 1                      | 325   | 337 | Carbamidomethylation | C7:Carbamidomethylation:1000.00  | PEAKS DB |
| R.LNAQRPDNRIESEG GYIETWNPNNQEFQC(+57.02)AGVALSR.T | Y    | 54.87  | 4132.9409 | 36     | 4.1  | 1034.2467 | 4 | 33.61 | 6        | F6:1655 | OB5944 H6 Ro.raw | 1.24E6             | 1        | 1                      | 35    | 70  | Carbamidomethylation | C29:Carbamidomethylation:1000.00 | PEAKS DB |
| R.NAMFVPHYTLNAHTIVVALN(+.98)GR.A                  | Y    | 41.82  | 2438.2529 | 22     | 0.3  | 813.7585  | 3 | 35.34 | 6        | F6:1755 | OB5944 H6 Ro.raw | 0                  | 0        | 0                      | 381   | 402 |                      | N20:Deamidation (NQ):13.05       | PEAKS DB |
| R.IESEG GYIETWNPNNQEFQC(+57.02)AGVALSR.T          | N    | 37.18  | 3068.3933 | 27     | -0.9 | 1023.8041 | 3 | 34.37 | 6        | F6:1699 | OB5944 H6 Ro.raw | 0                  | 0        | 0                      | 44    | 70  | Carbamidomethylation | C20:Carbamidomethylation:1000.00 | PEAKS DB |
| total 8 peptides                                  |      |        |           |        |      |           |   |       |          |         |                  |                    |          |                        |       |     |                      |                                  |          |

Q0GM57|Q0GM57\_ARAHY

back to list

| Protein Coverage | Supporting Peptides |

Protein Coverage:

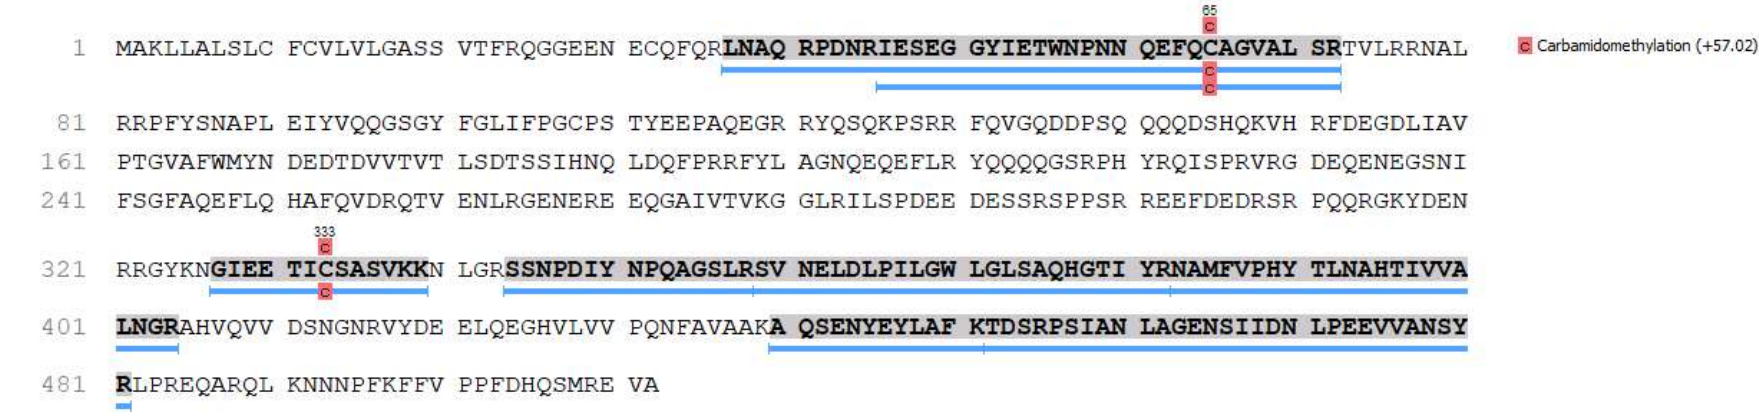

Supporting Peptides:

| Peptide                                           | Uniq | -10lgP | Mass      | Length | ppm  | m/z       | z | RT    | Fraction | Scan    | Source File      | Area Roast Ara h 6 | #Feature | #Feature Roast Ara h 6 | Start | End | PTM                  | AScore                           | Found By |
|---------------------------------------------------|------|--------|-----------|--------|------|-----------|---|-------|----------|---------|------------------|--------------------|----------|------------------------|-------|-----|----------------------|----------------------------------|----------|
| R.SSNPDIYNPQAGSLR.S                               | Y    | 107.40 | 1617.7747 | 15     | -0.5 | 809.8942  | 2 | 28.38 | 4        | F4:1346 | OB5942 H6 Ro.raw | 9.5502E4           | 3        | 3                      | 344   | 358 |                      |                                  | PEAKS DB |
| K.AQSENYEYLAFK.T                                  | Y    | 104.89 | 1461.6776 | 12     | 1.4  | 731.8471  | 2 | 31.44 | 6        | F6:1523 | OB5944 H6 Ro.raw | 3.7693E4           | 3        | 3                      | 440   | 451 |                      |                                  | PEAKS DB |
| K.TDSRPSIANLAGENSIIDNLPEEVVANSYR.L                | Y    | 94.41  | 3243.6006 | 30     | 5.4  | 1082.2133 | 3 | 36.10 | 6        | F6:1801 | OB5944 H6 Ro.raw | 7.4455E4           | 3        | 3                      | 452   | 481 |                      |                                  | PEAKS DB |
| R.SVNELDLPILGWLGLSAQHGTIYR.N                      | Y    | 70.38  | 2651.4070 | 24     | 4.0  | 1326.7161 | 2 | 39.73 | 6        | F6:2002 | OB5944 H6 Ro.raw | 1.8031E5           | 2        | 2                      | 359   | 382 |                      |                                  | PEAKS DB |
| N.GIEETIC(+57.02)SASVKK.N                         | Y    | 62.45  | 1420.7231 | 13     | 4.5  | 711.3721  | 2 | 27.29 | 5        | F5:1274 | OB5943 H6 Ro.raw | 6.0887E3           | 1        | 1                      | 327   | 339 | Carbamidomethylation | C7:Carbamidomethylation:1000.00  | PEAKS DB |
| R.LNAQRPDNRIESEG GYIETWNPNNQEFQC(+57.02)AGVALSR.T | Y    | 54.87  | 4132.9409 | 36     | 4.1  | 1034.2467 | 4 | 33.61 | 6        | F6:1655 | OB5944 H6 Ro.raw | 1.24E6             | 1        | 1                      | 37    | 72  | Carbamidomethylation | C29:Carbamidomethylation:1000.00 | PEAKS DB |
| total 8 peptides                                  |      |        |           |        |      |           |   |       |          |         |                  |                    |          |                        |       |     |                      |                                  |          |

[illegible]

**#CONTAM#P00761**

**[back to list](#)**

| [Protein Coverage](#) | [Supporting Peptides](#) |

### Protein Coverage:

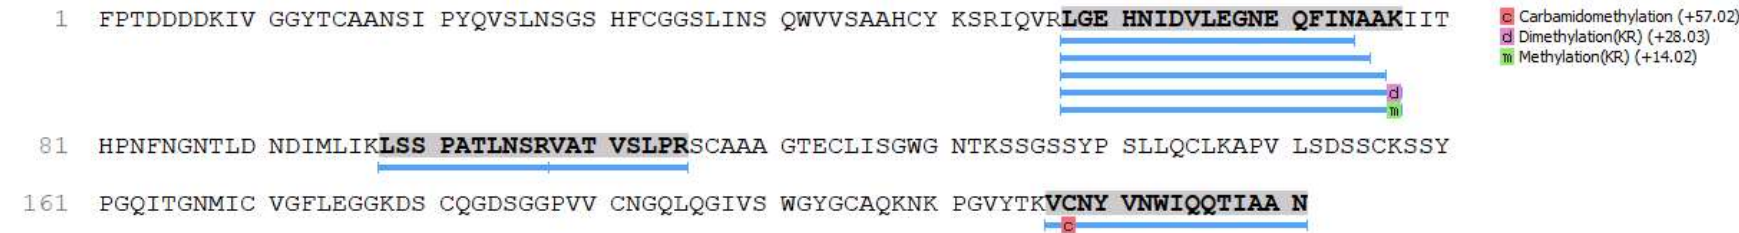

### Supporting Peptides:

| Peptide                          | Uniq | -10lgP | Mass      | Length | ppm  | m/z       | z | RT    | Fraction | Scan    | Source File      | Area     | Roast Area | #Feature | #Feature Roast Area | Start | End                  | PTM                             | AScore    | Found By |
|----------------------------------|------|--------|-----------|--------|------|-----------|---|-------|----------|---------|------------------|----------|------------|----------|---------------------|-------|----------------------|---------------------------------|-----------|----------|
| K.VC(+57.02)NYVNWIIQQTIAAN       | Y    | 84.98  | 1792.8567 | 15     | 2.5  | 897.4379  | 2 | 37.98 | 6        | F6:1908 | OB5944 H6 Ro.raw | 0        | 0          | 0        | 217                 | 231   | Carbamidomethylation | C2:Carbamidomethylation:1000.00 | PEAKS DB  |          |
| R.LGEHNIDVLEGNEQFIN.A            | Y    | 84.29  | 1939.9275 | 17     | 0.8  | 970.9718  | 2 | 33.77 | 5        | F5:1661 | OB5943 H6 Ro.raw | 2.2386E5 | 3          | 3        | 58                  | 74    |                      |                                 | PEAKS DB  |          |
| K.LSSPATLNSR.V                   | Y    | 84.13  | 1044.5564 | 10     | -0.6 | 523.2852  | 2 | 25.39 | 5        | F5:1175 | OB5943 H6 Ro.raw | 7.4318E4 | 3          | 3        | 98                  | 107   |                      |                                 | PEAKS DB  |          |
| R.VATVSLPR.S                     | Y    | 67.12  | 841.5021  | 8      | 1.6  | 421.7590  | 2 | 27.29 | 5        | F5:1289 | OB5943 H6 Ro.raw | 1.1013E6 | 3          | 3        | 108                 | 115   |                      |                                 | PEAKS DB  |          |
| R.LGEHNIDVLEGNEQFINAAK(+28.03).I | Y    | 63.33  | 2238.1279 | 20     | 2.1  | 747.0515  | 3 | 33.05 | 5        | F5:1620 | OB5943 H6 Ro.raw | 6.1249E4 | 3          | 3        | 58                  | 77    | Dimethylation(KR)    | K20:Dimethylation(KR):1000.00   | PEAKS PTM |          |
| R.V(+28.03)ATVSLPR.S             | Y    | 48.52  | 869.5334  | 8      | 0.1  | 435.7740  | 2 | 27.64 | 4        | F4:1296 | OB5942 H6 Ro.raw | 1.146E4  | 1          | 1        | 108                 | 115   |                      | V1:Ethylation:27.75             | PEAKS PTM |          |
| R.LGEHNIDVLEGNEQFINAA.K          | Y    | 44.86  | 2082.0017 | 19     | 4.4  | 1042.0127 | 2 | 33.98 | 4        | F4:1673 | OB5942 H6 Ro.raw | 2.6415E4 | 2          | 2        | 58                  | 76    |                      |                                 | PEAKS DB  |          |
| R.LGEHNIDVLEGNEQFINAAK(+14.02).I | Y    | 42.80  | 2224.1123 | 20     | 2.0  | 742.3795  | 3 | 32.54 | 4        | F4:1595 | OB5942 H6 Ro.raw | 4.8247E4 | 2          | 2        | 58                  | 77    | Methylation(KR)      | K20:Methylation(KR):1000.00     | PEAKS PTM |          |
| R.VAT(-18.01)VSLPR.S             | Y    | 38.92  | 823.4916  | 8      | 1.0  | 412.7535  | 2 | 27.07 | 6        | F6:1282 | OB5944 H6 Ro.raw | 4.8523E5 | 2          | 2        | 108                 | 115   |                      | T3:Dehydration:14.04            | PEAKS PTM |          |
| R.LGEHNIDVLEGNEQFINA.A           | Y    | 33.03  | 2010.9646 | 18     | 1.8  | 1006.4914 | 2 | 33.90 | 6        | F6:1672 | OB5944 H6 Ro.raw | 0        | 0          | 0        | 58                  | 75    |                      |                                 | PEAKS DB  |          |
| total 10 peptides                |      |        |           |        |      |           |   |       |          |         |                  |          |            |          |                     |       |                      |                                 |           |          |

## E9LFE8|E9LFE8\_ARAHY

**[back to list](#)**

| [Protein Coverage](#) | [Supporting Peptides](#) |

### Protein Coverage:



1 KSRKFFLGK PQEEKGEEGN MFSGLELKTV AESLGIDMGI AGKVQGVDDP RGSIIIVEDE LETLSPAVEE SGNGNGLDET  
81 LCTLR LVHQL AESTDADKYN PRAGFLTALN TPNLPVLQYV QLGADRGVYF KNAVMAPHYN LNCHAVIYGT EGR GWIEVVG  
161 ENGRKVYEGE VREGQILIVP QQFMVAKK AA EGSDEGFGWI AVKTSNPMI SPLAGKLSLI RAMPLPVL MN SFRLTAE EAI  
241 NLKKRGELTF FSPDPAHTQI

Supporting Peptides:

| Peptide                              | Uniq | -10lgP | Mass      | Length | ppm  | m/z       | z | RT    | Fraction | Scan    | Source File      | Area Roast Ara h 6 | #Feature | #Feature Roast Ara h 6 | Start | End | PTM                 | AScore | Found By  |
|--------------------------------------|------|--------|-----------|--------|------|-----------|---|-------|----------|---------|------------------|--------------------|----------|------------------------|-------|-----|---------------------|--------|-----------|
| K.AAEGSDEGFGWIAVK.T                  | Y    | 82.18  | 1535.7256 | 15     | 1.0  | 768.8708  | 2 | 33.77 | 5        | F5:1664 | OB5943 H6 Ro.raw | 3.9296E3           | 1        | 1                      | 189   | 203 |                     |        | PEAKS DB  |
| K.TSDNPMISPLAGK.L                    | Y    | 82.04  | 1329.6598 | 13     | 1.5  | 665.8381  | 2 | 29.58 | 4        | F4:1419 | OB5942 H6 Ro.raw | 3.9148E3           | 2        | 2                      | 204   | 216 |                     |        | PEAKS DB  |
| R.AMPLPVL MN SFR.L                   | Y    | 75.70  | 1374.7152 | 12     | 1.8  | 688.3661  | 2 | 36.29 | 6        | F6:1813 | OB5944 H6 Ro.raw | 4.7937E3           | 1        | 1                      | 222   | 233 |                     |        | PEAKS DB  |
| R.AGFLTALNTPNLPVLQYVQLGAD(+28.03)R.G | Y    | 73.53  | 2598.4170 | 24     | 3.7  | 1300.2206 | 2 | 39.54 | 6        | F6:2001 | OB5944 H6 Ro.raw | 3.6606E4           | 2        | 2                      | 103   | 126 | D23:Ethylation:8.14 |        | PEAKS PTM |
| R.GWIEVVGENGR.K                      | Y    | 72.13  | 1214.6044 | 11     | -0.4 | 608.3092  | 2 | 31.99 | 5        | F5:1556 | OB5943 H6 Ro.raw | 0                  | 0        | 0                      | 154   | 164 |                     |        | PEAKS DB  |
| R.LVHQLAESTDADKYNPR.A                | Y    | 50.86  | 1955.9701 | 17     | -1.7 | 652.9962  | 3 | 28.77 | 5        | F5:1364 | OB5943 H6 Ro.raw | 1.711E4            | 1        | 1                      | 86    | 102 |                     |        | PEAKS DB  |
| total 6 peptides                     |      |        |           |        |      |           |   |       |          |         |                  |                    |          |                        |       |     |                     |        |           |

sp|Q6PSU2|CONG7\_ARAHY

back to list

| Protein Coverage | Supporting Peptides |

Protein Coverage:

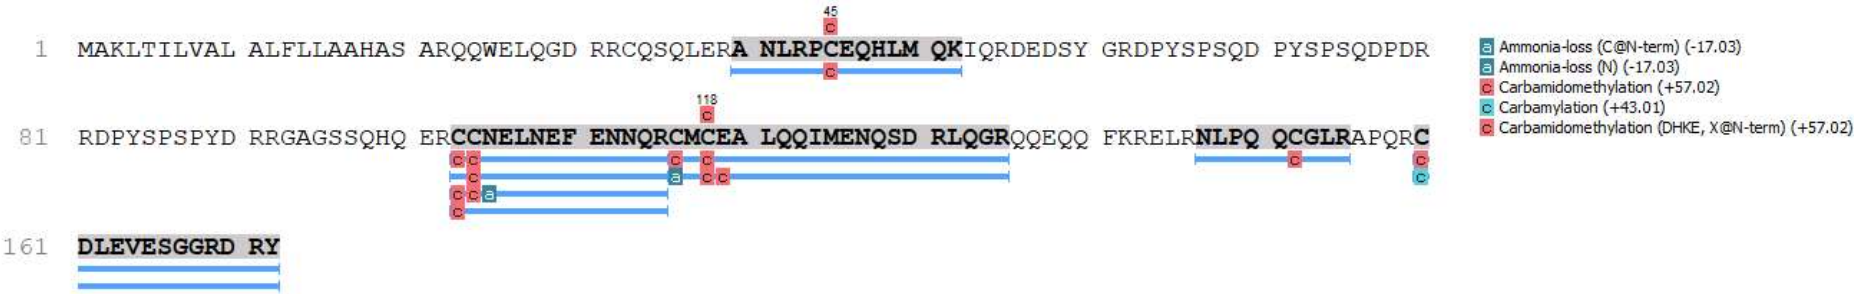

Supporting Peptides:

| Peptide                           | Uniq | -10lgP | Mass      | Length | ppm | m/z      | z | RT    | Fraction | Scan    | Source File      | Area Roast Ara h 6 | #Feature | #Feature Roast Ara h 6 | Start | End | PTM                  | AScore                                                          | Found By  |
|-----------------------------------|------|--------|-----------|--------|-----|----------|---|-------|----------|---------|------------------|--------------------|----------|------------------------|-------|-----|----------------------|-----------------------------------------------------------------|-----------|
| R.C(+57.02)C(+57.02)NELNEFENNQR.C | Y    | 89.52  | 1725.6835 | 13     | 0.6 | 863.8495 | 2 | 28.77 | 5        | F5:1368 | OB5943 H6 Ro.raw | 4.17E4             | 2        | 2                      | 103   | 115 | Carbamidomethylation | C1:Carbamidomethylation:1000.00;C2:Carbamidomethylation:1000.00 | PEAKS DB  |
| R.C(+57.02)C(+71.04)NELNEFENNQR.C | Y    | 86.91  | 1739.6992 | 13     | 1.9 | 870.8585 | 2 | 28.96 | 5        | F5:1370 | OB5943 H6 Ro.raw | 1.9505E4           | 2        | 2                      | 103   | 115 | Carbamidomethylation | C1:Carbamidomethylation:1000.00;C2:Propionamide:0.00            | PEAKS PTM |
| R.ANLRPC(+57.02)EQHLMQK.I         | Y    | 75.34  | 1623.7974 | 13     | 2.9 | 542.2747 | 3 | 27.48 | 6        | F6:1292 | OB5944 H6 Ro.raw | 1.3154E4           | 2        | 2                      | 40    | 52  | Carbamidomethylation | C6:Carbamidomethylation:1000.00                                 | PEAKS DB  |
| total 15 peptides                 |      |        |           |        |     |          |   |       |          |         |                  |                    |          |                        |       |     |                      |                                                                 |           |

| Peptide                                          | Uniq | -10lgP | Mass      | Length | ppm  | m/z      | z | RT    | Fraction | Scan    | Source File      | Area Roast Ara h 6 | #Feature | #Feature Roast Ara h 6 | Start | End | PTM                                                                                  | AScore                                                                                                            | Found By  |
|--------------------------------------------------|------|--------|-----------|--------|------|----------|---|-------|----------|---------|------------------|--------------------|----------|------------------------|-------|-----|--------------------------------------------------------------------------------------|-------------------------------------------------------------------------------------------------------------------|-----------|
| R.C(+57.02)DLEVESGGRDRY                          | Y    | 75.20  | 1554.6732 | 13     | -0.6 | 778.3434 | 2 | 27.14 | 5        | F5:1269 | OB5943 H6 Ro.raw | 1.1586E4           | 3        | 3                      | 160   | 172 | Carbamidomethylation                                                                 | C1:Carbamidomethylation:1000.00                                                                                   | PEAKS DB  |
| R.C(+57.02)MC(+57.02)EALQQIMENQSDRLQGR.Q         | Y    | 71.68  | 2466.0872 | 20     | 2.1  | 823.0381 | 3 | 33.87 | 6        | F6:1661 | OB5944 H6 Ro.raw | 1.1688E5           | 2        | 2                      | 116   | 135 | Carbamidomethylation                                                                 | C1:Carbamidomethylation:1000.00;C3:Carbamidomethylation:1000.00                                                   | PEAKS DB  |
| R.C(+57.02)C(+57.02)N(+.98)ELNEFENNQR.C          | Y    | 58.73  | 1726.6675 | 13     | -3.2 | 864.3383 | 2 | 28.65 | 5        | F5:1358 | OB5943 H6 Ro.raw | 0                  | 0        | 0                      | 103   | 115 | Carbamidomethylation                                                                 | C1:Carbamidomethylation:1000.00;N3:Deamidation (NQ):22.69                                                         | PEAKS DB  |
| R.C(+57.02)C(+57.02)N(-17.03)ELNEFENNQR.C        | Y    | 58.39  | 1708.6570 | 13     | 1.1  | 855.3367 | 2 | 32.90 | 5        | F5:1610 | OB5943 H6 Ro.raw | 3.7737E3           | 1        | 1                      | 103   | 115 | Carbamidomethylation; Ammonia-loss (N)                                               | C1:Carbamidomethylation:1000.00;C2:Carbamidomethylation:1000.00;N3:Ammonia-loss (N):67.21                         | PEAKS PTM |
| R.C(+57.02)M(+15.99)C(+57.02)EALQQIMENQSDRLQGR.Q | Y    | 56.92  | 2482.0820 | 20     | 1.7  | 828.3694 | 3 | 32.29 | 5        | F5:1571 | OB5943 H6 Ro.raw | 1.1939E4           | 1        | 1                      | 116   | 135 | Carbamidomethylation                                                                 | C1:Carbamidomethylation:1000.00;M2:Oxidation (M):49.31;C3:Carbamidomethylation:1000.00                            | PEAKS DB  |
| R.NLPQQC(+57.02)GLR.A                            | Y    | 54.00  | 1084.5448 | 9      | -1.6 | 543.2788 | 2 | 25.64 | 5        | F5:1178 | OB5943 H6 Ro.raw | 7.5313E3           | 1        | 1                      | 147   | 155 | Carbamidomethylation                                                                 | C6:Carbamidomethylation:1000.00                                                                                   | PEAKS DB  |
| R.C(+57.02)C(+57.02)NELN(+.98)EFENNQR.C          | Y    | 52.39  | 1726.6675 | 13     | -3.5 | 864.3380 | 2 | 28.36 | 6        | F6:1346 | OB5944 H6 Ro.raw | 0                  | 0        | 0                      | 103   | 115 | Carbamidomethylation                                                                 | C1:Carbamidomethylation:1000.00;C2:Carbamidomethylation:1000.00;N6:Deamidation (NQ):26.38                         | PEAKS DB  |
| R.C(+57.02)C(+58.01)N(+.98)ELNEFENNQR.C          | Y    | 39.19  | 1727.6515 | 13     | 8.5  | 864.8404 | 2 | 28.91 | 4        | F4:1376 | OB5942 H6 Ro.raw | 0                  | 0        | 0                      | 103   | 115 | Carbamidomethylation                                                                 | C1:Carbamidomethylation:1000.00;C2:Carboxymethyl:0.00;N3:Deamidation (NQ):22.45                                   | PEAKS PTM |
| R.C(+71.04)C(+57.02)NELNEFENNQR.C                | Y    | 37.48  | 1739.6992 | 13     | 2.3  | 870.8589 | 2 | 28.64 | 4        | F4:1360 | OB5942 H6 Ro.raw | 0                  | 0        | 0                      | 103   | 115 | Carbamidomethylation                                                                 | C1:Propionamide:14.02;C2:Carbamidomethylation:1000.00                                                             | PEAKS PTM |
| R.C(+43.01)DLEVESGGRDRY                          | Y    | 37.45  | 1540.6576 | 13     | 1.4  | 771.3372 | 2 | 26.82 | 6        | F6:1254 | OB5944 H6 Ro.raw | 0                  | 0        | 0                      | 160   | 172 | Carbamylation                                                                        | C1:Carbamylation:1000.00                                                                                          | PEAKS PTM |
| R.C(-17.03)MC(+57.02)E(+57.02)ALQQIMENQSDRLQGR.Q | Y    | 35.18  | 2449.0608 | 20     | 0.3  | 817.3611 | 3 | 37.71 | 5        | F5:1889 | OB5943 H6 Ro.raw | 4.4611E3           | 1        | 1                      | 116   | 135 | Ammonia-loss (C@N-term); Carbamidomethylation; Carbamidomethylation (DHKE, X@N-term) | C1:Ammonia-loss (C@N-term):1000.00;C3:Carbamidomethylation:1000.00;E4:Carbamidomethylation (DHKE, X@N-term):56.43 | PEAKS PTM |
| R.C(+57.02)CNE(+57.02)LN(+.98)EFENNQR.C          | Y    | 33.57  | 1726.6675 | 13     | -3.1 | 864.3384 | 2 | 29.21 | 6        | F6:1396 | OB5944 H6 Ro.raw | 0                  | 0        | 0                      | 103   | 115 | Carbamidomethylation                                                                 | C1:Carbamidomethylation:1000.00;E4:Carbamidomethylation (DHKE, X@N-term):47.36;N6:Deamidation (NQ):7.89           | PEAKS PTM |
| total 15 peptides                                |      |        |           |        |      |          |   |       |          |         |                  |                    |          |                        |       |     |                                                                                      |                                                                                                                   |           |

Peptide List

Prepared with PEAKS™ (bioinfor.com)
