# Supplementary material for: Proteomic Profiling of Major Peanut Allergens and Their Post-Translational Modifications Affected by Roasting
Source: Foods. 2022 Dec 9;11(24):3993. doi: 10.3390/foods11243993 (PMC9778155; doi:10.3390/foods11243993)
Supplement: Supplementary file 1 [file foods-11-03993-s001.zip]

Archive with 4 entries (4 files):
- Report S1.pdf
- Report S2.pdf
- Supplementary material.pdf
- Supplementary Table S2.xlsx
