# Supplementary material for: Proteomic Profiling of Major Peanut Allergens and Their Post-Translational Modifications Affected by Roasting
Source: Foods. 2022 Dec 9;11(24):3993. doi: 10.3390/foods11243993 (PMC9778155; doi:10.3390/foods11243993)
Supplement: Supplementary file 1 [file foods-11-03993-s001.zip › Supplementary Table S2.xlsx]

## Sheet: Table S2
Table S2.	Peanut allergen modification profling - PTM profles of peanut major allergen modifications from raw and roasted peanut samples												Area under XIC curve
Protein	Protein Description	Protein Cluster ID	Protein Position	Modified Peptide Sequence Window	Modifications	Best -10logP	Best AScore	Best Ion Intensity (%)	Best AScore_raw peanut	Best Ion Intensity (%)_raw peanut	Best AScore_roasted peanut	Best Ion Intensity (%)_roasted peanut	raw peanut modified	raw peanut unmodified	roasted peanut modified	roasted peanut unmodified
P43237|ALL11_ARAHY	Allergen Ara h 1 clone P17 OS=Arachis hypogaea OX=3818 PE=1 SV=1	1	K222	EARPNTLVLPkHADADNILVI	Acetylation (K)	35.75	1000	0	1000	0	N/A	N/A	8490000	292000000	0	48000000
P43237|ALL11_ARAHY	Allergen Ara h 1 clone P17 OS=Arachis hypogaea OX=3818 PE=1 SV=1	1	H223	ARPNTLVLPKhADADNILVIQ	Acetylation (N-term)	40.04	1000	5	1000	5	N/A	N/A	248000	460000000	0	8680000
P43237|ALL11_ARAHY	Allergen Ara h 1 clone P17 OS=Arachis hypogaea OX=3818 PE=1 SV=1	1	S249	VTVANGNNRKsFNLDEGHALR	Acetylation (N-term)	35.51	1000	5	N/A	N/A	1000	5	0	329000000	1560000	203000000
P43237|ALL11_ARAHY	Allergen Ara h 1 clone P17 OS=Arachis hypogaea OX=3818 PE=1 SV=1	1	D302	FEDFFPASSRdQSSYLQGFSR	Acetylation (N-term)	31.84	1000	5	1000	5	N/A	N/A	37700	162000000	0	101000000
tr|E5G076|E5G076_ARAHY	Ara h 1 allergen OS=Arachis hypogaea OX=3818 GN=ara h 1 PE=4 SV=1	5	I214	RQFQNLQNHRiVQIEAKPNTL	Acetylation (N-term)	43.48	1000	0	1000	0	1000	0	16200000	311000000	441000	32300000
tr|E5G076|E5G076_ARAHY	Ara h 1 allergen OS=Arachis hypogaea OX=3818 GN=ara h 1 PE=4 SV=1	5	D305	FEDFFPASSRdQSSYLQGFSR	Acetylation (N-term)	31.84	1000	5	1000	5	N/A	N/A	37700	61500000	0	97300000
A0A0A6ZDP1|A0A0A6ZDP1_ARAHY	Glyceraldehyde-3-phosphate dehydrogenase C2 OS=Arachis hypogaea OX=3818 PE=2 SV=1	15	R14	HYQIALFHLPrSSTTGLGIVE	Acetylation (Protein N-term)	79.84	1000	1	1000	1	N/A	N/A	64200000	0	0	0
A0A0F6VX63|A0A0F6VX63_ARAHY	Annexin OS=Arachis hypogaea OX=3818 PE=2 SV=1	20	S2	*********MsTLRIPQPVPP	Acetylation (Protein N-term)	62.05	1000	0	1000	0	N/A	N/A	141000	0	0	0
A0A0F7GF62|A0A0F7GF62_ARAHY	Annexin OS=Arachis hypogaea OX=3818 GN=AnnAh6 PE=2 SV=1	28	A2	*********MaTLIAPSNHSS	Acetylation (Protein N-term)	95.71	1000	5	1000	5	N/A	N/A	194000	0	0	0
Q45W80|Q45W80_ARAHY	Nucleoside diphosphate kinase OS=Arachis hypogaea OX=3818 PE=2 SV=1	23	A2	*********MaEQTFIMIKPD	Acetylation (Protein N-term)	81.61	1000	0	1000	0	N/A	N/A	49400	0	0	0
P43237|ALL11_ARAHY	Allergen Ara h 1 clone P17 OS=Arachis hypogaea OX=3818 PE=1 SV=1	1	K222	EARPNTLVLPkHADADNILVI	Amidation	35.75	1000	0	1000	0	N/A	N/A	8490000	292000000	0	48000000
P43237|ALL11_ARAHY	Allergen Ara h 1 clone P17 OS=Arachis hypogaea OX=3818 PE=1 SV=1	1	I260	FNLDEGHALRiPSGFISYILN	Amidination of lysines or N-terminal amines with methyl acetimidate	57.92	1000	0	1000	0	1000	0	15700000	750000000	17800000	604000000
P43237|ALL11_ARAHY	Allergen Ara h 1 clone P17 OS=Arachis hypogaea OX=3818 PE=1 SV=1	1	A444	ALMLPHFNSKaMVIVVVNKGT	Amidination of lysines or N-terminal amines with methyl acetimidate	58.22	207.56	0	170.86	0	207.56	0	59500000	494000000	12000000	193000000
Q9FZ11|Q9FZ11_ARAHY	Ara h 3 Gly1 OS=Arachis hypogaea OX=3818 GN=Gly1 PE=2 SV=1	5	G345	RGRGSRGRGNgIEETICTASV	Amidination of lysines or N-terminal amines with methyl acetimidate	51.88	96.47	5	N/A	N/A	96.47	5	0	504000	15500	330000
Q647H3|Q647H3_ARAHY	Ara h 3 Arachin Ahy-2 OS=Arachis hypogaea OX=3818 PE=2 SV=1	4	G353	RGRGSRGRGNgIEETICTASV	Amidination of lysines or N-terminal amines with methyl acetimidate	51.88	96.47	5	N/A	N/A	96.47	5	0	504000	15500	330000
E9LFE8|E9LFE8_ARAHY	11S arachin (Fragment) OS=Arachis hypogaea OX=3818 PE=2 SV=1	8	G76	PAVEESGNGNgLDETLCTLRL	Amidination of lysines or N-terminal amines with methyl acetimidate	38.33	1000	5	1000	5	N/A	N/A	130000	8950000	0	2210000
A1E2B0|A1E2B0_ARAHY	11S seed storage globulin B1 OS=Arachis hypogaea OX=3818 PE=2 SV=1	6	C29	LSLAHRYPTKcSFDKLVALEP	Ammonia-loss (C@N-term)	57.91	1000	0	1000	0	N/A	N/A	1340000	0	0	0
sp|Q647G9|CONG_ARAHY	Ara h 6 Conglutin OS=Arachis hypogaea OX=3818 PE=1 SV=1	1	C79	STRSSDQQQRcCDELNEMENT	Ammonia-loss (C@N-term)	82.4	1000	0	1000	0	1000	0	9460	0	39000	0
sp|Q647G9|CONG_ARAHY	Ara h 6 Conglutin OS=Arachis hypogaea OX=3818 PE=1 SV=1	1	C92	ELNEMENTQRcMCEALQQIME	Ammonia-loss (C@N-term)	96.89	1000	0	1000	0	1000	0	32700	0	197000	0
sp|Q6PSU2|CONG7_ARAHY	Ara h 2 Conglutin-7 OS=Arachis hypogaea OX=3818 PE=1 SV=2	15	C116	ELNEFENNQRcMCEALQQIME	Ammonia-loss (C@N-term)	32.31	1000	0	N/A	N/A	1000	0	0	0	4460	0
sp|Q6PSU2|CONG7_ARAHY	Ara h 2 Conglutin-7 OS=Arachis hypogaea OX=3818 PE=1 SV=2	11	C116	ELNEFENNQRcMCEALQQIME	Ammonia-loss (C@N-term)	50.59	1000	0	N/A	N/A	1000	0	0	0	539000	0
P43237|ALL11_ARAHY	Allergen Ara h 1 clone P17 OS=Arachis hypogaea OX=3818 PE=1 SV=1	1	N270	IPSGFISYILnRHDNQNLRVA	Ammonia-loss (N)	69.08	1000	0	1000	0	1000	0	556000	758000000	1510000	621000000
A0A089ZXL7|A0A089ZXL7_ARAHY	Peanut agglutinin variant OS=Arachis hypogaea OX=3818 PE=2 SV=1	8	L197	TVIYDSSTKTlSVAVTNDNGD	Benzoyl	33.97	124.1	0	124.1	0	N/A	N/A	127000	27300000	0	791000
B4UW81|B4UW81_ARAHY	Glutathione S-transferase 2 OS=Arachis hypogaea OX=3818 PE=2 SV=1	26	D142	KDHTGRYATGdEIFLADVFLA	Beta-methylthiolation (ND)	58.93	71.26	0	71.26	0	N/A	N/A	635000	3700000	0	0
N1NG13|N1NG13_ARAHY	Ara h 1 Seed storage protein Ara h1 OS=Arachis hypogaea OX=3818 GN=ARAX_AHF417E07-017 PE=4 SV=1	1	S255	VTVANGNNRKsFNLDEGHALR	Carbamidomethylation (DHKE X@N-term)	49.26	63.97	5	N/A	N/A	63.97	5	0	67600000	670000	41900000
N1NG13|N1NG13_ARAHY	Ara h 1 Seed storage protein Ara h1 OS=Arachis hypogaea OX=3818 GN=ARAX_AHF417E07-017 PE=4 SV=2	1	I266	FNLDEGHALRiPSGFISYILN	Carbamidomethylation (DHKE X@N-term)	91.96	1000	5	N/A	N/A	1000	5	0	128000000	72300	56600000
N1NG13|N1NG13_ARAHY	Ara h 1 Seed storage protein Ara h1 OS=Arachis hypogaea OX=3818 GN=ARAX_AHF417E07-017 PE=4 SV=3	1	I541	FGINAENNHRiFLAGDKDNVI	Carbamidomethylation (DHKE X@N-term)	65.08	56.98	5	N/A	N/A	56.98	5	0	25400000	22900	5190000
sp|P43238|ALL12_ARAHY	Allergen Ara h 1 clone P41B OS=Arachis hypogaea OX=3818 PE=1 SV=1	1	S255	VTVANGNNRKsFNLDEGHALR	Carbamidomethylation (DHKE X@N-term)	49.26	63.97	5	N/A	N/A	63.97	5	0	67600000	670000	41900000
sp|P43238|ALL12_ARAHY	Allergen Ara h 1 clone P41B OS=Arachis hypogaea OX=3818 PE=1 SV=1	1	I266	FNLDEGHALRiPSGFISYILN	Carbamidomethylation (DHKE X@N-term)	91.96	1000	5	N/A	N/A	1000	5	0	128000000	72300	56600000
sp|P43238|ALL12_ARAHY	Allergen Ara h 1 clone P41B OS=Arachis hypogaea OX=3818 PE=1 SV=1	1	I541	FGINAENNHRiFLAGDKDNVI	Carbamidomethylation (DHKE X@N-term)	65.08	56.98	5	N/A	N/A	56.98	5	0	25400000	22900	5190000
Q6PSU3|Q6PSU3_ARAHY	Ara h 1 Conarachin (Fragment) OS=Arachis hypogaea OX=3818 PE=4 SV=1	2	S249	VTVANGNNRKsFNLDEGHALR	Carbamidomethylation (DHKE X@N-term)	49.26	63.97	5	N/A	N/A	63.97	5	0	67600000	670000	41900000
Q6PSU3|Q6PSU3_ARAHY	Ara h 1 Conarachin (Fragment) OS=Arachis hypogaea OX=3818 PE=4 SV=2	2	I260	FNLDEGHALRiPSGFISYILN	Carbamidomethylation (DHKE X@N-term)	91.96	1000	5	N/A	N/A	1000	5	0	128000000	72300	56600000
Q6PSU3|Q6PSU3_ARAHY	Ara h 1 Conarachin (Fragment) OS=Arachis hypogaea OX=3818 PE=4 SV=3	2	I536	FGINAENNHRiFLAGDKDNVI	Carbamidomethylation (DHKE X@N-term)	65.08	56.98	5	N/A	N/A	56.98	5	0	25400000	22900	5190000
sp|P43237|ALL11_ARAHY	Allergen Ara h 1 clone P17 OS=Arachis hypogaea OX=3818 PE=1 SV=1	2	S249	VTVANGNNRKsFNLDEGHALR	Carbamidomethylation (DHKE X@N-term)	49.26	63.97	5	N/A	N/A	63.97	5	0	67600000	670000	41900000
sp|P43237|ALL11_ARAHY	Allergen Ara h 1 clone P17 OS=Arachis hypogaea OX=3818 PE=1 SV=1	2	I260	FNLDEGHALRiPSGFISYILN	Carbamidomethylation (DHKE X@N-term)	91.96	1000	5	N/A	N/A	1000	5	0	128000000	72300	56600000
sp|P43237|ALL11_ARAHY	Allergen Ara h 1 clone P17 OS=Arachis hypogaea OX=3818 PE=1 SV=1	2	I536	FGINAENNHRiFLAGDKDNVI	Carbamidomethylation (DHKE X@N-term)	65.08	56.98	5	N/A	N/A	56.98	5	0	25400000	22900	5190000
Q647H3|Q647H3_ARAHY	Ara h 3 Arachin Ahy-2 OS=Arachis hypogaea OX=3818 PE=2 SV=1	10	G99	PQEIFIQQGRgYFGLIFPGCP	Carbamidomethylation (DHKE X@N-term)	35.47	130.55	0	N/A	N/A	130.55	0	0	1780000	54900	6060000
A1DZF0|A1DZF0_ARAHY	Arachin 6 OS=Arachis hypogaea OX=3818 PE=2 SV=1	9	G99	PQEIFIQQGRgYFGLIFPGCP	Carbamidomethylation (DHKE X@N-term)	35.47	130.55	0	N/A	N/A	130.55	0	0	1780000	54900	6060000
A1E2B0|A1E2B0_ARAHY	11S seed storage globulin B1 OS=Arachis hypogaea OX=3818 PE=2 SV=1	6	G76	SALRYSIKPKgLLLPHYINAP	Carbamidomethylation (DHKE X@N-term)	87.09	80.34	2	80.34	0	80.34	2	548000	8380000	199000	2280000
A0A0A6ZDP1|A0A0A6ZDP1_ARAHY	Glyceraldehyde-3-phosphate dehydrogenase C2 OS=Arachis hypogaea OX=3818 PE=2 SV=1	15	E24	RSSTTGLGIVeGLMTTVHSIT	Carbamidomethylation (DHKE X@N-term)	57.83	201.29	0	201.29	0	N/A	N/A	2120000	63300000	0	0
A1DZF0|A1DZF0_ARAHY	Arachin 6 OS=Arachis hypogaea OX=3818 PE=2 SV=1	3	A88	NALRRPFYSNaPQEIFIQQGR	Carbamidomethylation (DHKE X@N-term)	36.81	1000	0	N/A	N/A	1000	0	0	238000	34700	3410000
Q9FZ11|Q9FZ11_ARAHY	Ara h 3 Gly1 OS=Arachis hypogaea OX=3818 GN=Gly1 PE=2 SV=1	2	A89	NALRRPFYSNaPQEIFIQQGR	Carbamidomethylation (DHKE X@N-term)	36.81	1000	0	N/A	N/A	1000	0	0	238000	34700	3410000
Q647H3|Q647H3_ARAHY	Ara h 3 Arachin Ahy-2 OS=Arachis hypogaea OX=3818 PE=2 SV=1	5	A88	NALRRPFYSNaPQEIFIQQGR	Carbamidomethylation (DHKE X@N-term)	36.81	1000	0	N/A	N/A	1000	0	0	238000	34700	3410000
Q647H4|Q647H4_ARAHY	Ara h 3 Arachin Ahy-1 OS=Arachis hypogaea OX=3818 PE=2 SV=1	7	A88	NALRRPFYSNaPQEIFIQQGR	Carbamidomethylation (DHKE X@N-term)	36.81	1000	0	N/A	N/A	1000	0	0	238000	34700	3410000
A5Z1R0|A5Z1R0_ARAHY	Ara h 6 allergen OS=Arachis hypogaea OX=3818 GN=Ara h 6 PE=4 SV=1	1	E95	EMENTQRCMCeALQQIMENQC	Carbamidomethylation (DHKE X@N-term)	96.89	194.4	2	194.4	0	151.49	2	32700	4050000	197000	4060000
sp|Q647G9|CONG_ARAHY	Ara h 6 Conglutin OS=Arachis hypogaea OX=3818 PE=1 SV=1	1	E95	EMENTQRCMCeALQQIMENQC	Carbamidomethylation (DHKE X@N-term)	96.89	194.4	2	194.4	0	151.49	2	32700	4050000	197000	4060000
sp|Q6PSU2|CONG7_ARAHY	Ara h 2 Conglutin-7 OS=Arachis hypogaea OX=3818 PE=1 SV=2	15	E119	EFENNQRCMCeALQQIMENQS	Carbamidomethylation (DHKE X@N-term)	32.31	56.43	0	N/A	N/A	56.43	0	0	0	4460	129000
A1DZF0|A1DZF0_ARAHY	Arachin 6 OS=Arachis hypogaea OX=3818 PE=2 SV=1	1	S458	VPQNFAVAGKsQSENFEYVAF	Carbamidomethylation (DHKE X@N-term)	64.65	56.33	0	N/A	N/A	56.33	0	0	10500000	145000	20700000
Q6IWG5|Q6IWG5_ARAHY	Ara h 3 Glycinin (Fragment) OS=Arachis hypogaea OX=3818 PE=2 SV=1	7	A438	VPQNFAVAAKaQSENYEYLAF	Carbamidomethylation (DHKE X@N-term)	81.42	56.33	1	N/A	N/A	56.33	1	0	5390000	54800	8640000
Q0GM57|Q0GM57_ARAHY	Ara h 3 Iso-Ara h3 OS=Arachis hypogaea OX=3818 PE=2 SV=1	7	A440	VPQNFAVAAKaQSENYEYLAF	Carbamidomethylation (DHKE X@N-term)	81.42	56.33	1	N/A	N/A	56.33	1	0	5390000	54800	8640000
Q6T2T4|Q6T2T4_ARAHY	Ara h 3 Storage protein OS=Arachis hypogaea OX=3818 PE=2 SV=1	2	W395	ANELNLLILRwLGLSAEYGNL	Carbamidomethylation (DHKE X@N-term)	57.07	62.19	0	N/A	N/A	62.19	0	0	39700000	18500	56900000
Q647H4|Q647H4_ARAHY	Ara h 3 Arachin Ahy-1 OS=Arachis hypogaea OX=3818 PE=2 SV=1	2	W395	ANELNLLILRwLGLSAEYGNL	Carbamidomethylation (DHKE X@N-term)	57.07	62.19	0	N/A	N/A	62.19	0	0	39700000	18500	56900000
Q647H4|Q647H4_ARAHY	Ara h 3 Arachin Ahy-1 OS=Arachis hypogaea OX=3818 PE=2 SV=1	2	S465	VPQNFAVAGKsQSENFEYVAF	Carbamidomethylation (DHKE X@N-term)	64.65	56.33	0	N/A	N/A	56.33	0	0	10500000	145000	20700000
Q9FZ11|Q9FZ11_ARAHY	Ara h 3 Gly1 OS=Arachis hypogaea OX=3818 GN=Gly1 PE=2 SV=1	5	W388	ANDLNLLILRwLGLSAEYGNL	Carbamidomethylation (DHKE X@N-term)	57.07	62.19	0	N/A	N/A	62.19	0	0	39700000	18500	56900000
Q647H3|Q647H3_ARAHY	Ara h 3 Arachin Ahy-2 OS=Arachis hypogaea OX=3818 PE=2 SV=1	4	W396	ANDLNLLILRwLGLSAEYGNL	Carbamidomethylation (DHKE X@N-term)	57.07	62.19	0	N/A	N/A	62.19	0	0	39700000	18500	56900000
E9LFE8|E9LFE8_ARAHY	11S arachin (Fragment) OS=Arachis hypogaea OX=3818 PE=2 SV=1	8	K216	DNPMISPLAGkLSLIRAMPLP	Carbamidomethylation (DHKE X@N-term)	47.82	74.63	0	74.63	0	N/A	N/A	68000	2920000	0	670000
E9LFE8|E9LFE8_ARAHY	11S arachin (Fragment) OS=Arachis hypogaea OX=3818 PE=2 SV=1	8	A222	PLAGKLSLIRaMPLPVLMNSF	Carbamidomethylation (DHKE X@N-term)	60.6	1000	1	1000	1	1000	1	133000	19800000	106000	5580000
sp|Q647H2|AHY3_ARAHY	Ara h 3 Arachin Ahy-3 OS=Arachis hypogaea OX=3818 PE=1 SV=1	10	L343	NELDLPILNRlGLSAEYGSIH	Carbamidomethylation (DHKE X@N-term)	54.1	52.67	1	52.67	1	N/A	N/A	21400	650000	0	208000
sp|Q6PSU2|CONG7_ARAHY	Ara h 2 Conglutin-7 OS=Arachis hypogaea OX=3818 PE=1 SV=2	11	E119	EFENNQRCMCeALQQIMENQS	Carbamidomethylation (DHKE X@N-term)	50.59	83.88	0	N/A	N/A	83.88	0	0	6760000	539000	3680000
P43237|ALL11_ARAHY	Allergen Ara h 1 clone P17 OS=Arachis hypogaea OX=3818 PE=1 SV=1	1	H223	ARPNTLVLPKhADADNILVIQ	Carbamylation	79.69	252.85	5	252.85	5	N/A	N/A	1790000	460000000	0	8680000
P43237|ALL11_ARAHY	Allergen Ara h 1 clone P17 OS=Arachis hypogaea OX=3818 PE=1 SV=1	1	K248	TVTVANGNNRkSFNLDEGHAL	Carbamylation	54.16	1000	5	1000	5	1000	5	226000	464000000	308000	15300000
P43237|ALL11_ARAHY	Allergen Ara h 1 clone P17 OS=Arachis hypogaea OX=3818 PE=1 SV=1	1	S249	VTVANGNNRKsFNLDEGHALR	Carbamylation	57.4	1000	5	1000	5	1000	5	4500000	329000000	1940000	203000000
P43237|ALL11_ARAHY	Allergen Ara h 1 clone P17 OS=Arachis hypogaea OX=3818 PE=1 SV=1	1	F250	TVANGNNRKSfNLDEGHALRI	Carbamylation	39.11	1000	3	N/A	N/A	1000	3	0	334000000	2260000	207000000
P43237|ALL11_ARAHY	Allergen Ara h 1 clone P17 OS=Arachis hypogaea OX=3818 PE=1 SV=1	1	I282	HDNQNLRVAKiSMPVNTPGQF	Carbamylation	60.85	1000	0	1000	0	N/A	N/A	768000	366000000	0	123000000
P43237|ALL11_ARAHY	Allergen Ara h 1 clone P17 OS=Arachis hypogaea OX=3818 PE=1 SV=1	1	V329	FNAEFNEIRRvLLEENAGGEQ	Carbamylation	39.13	1000	0	N/A	N/A	1000	0	0	16100000	422000	37700000
P43237|ALL11_ARAHY	Allergen Ara h 1 clone P17 OS=Arachis hypogaea OX=3818 PE=1 SV=1	1	A444	ALMLPHFNSKaMVIVVVNKGT	Carbamylation	34.74	161.2	1	N/A	N/A	161.2	1	0	494000000	423000	193000000
P43237|ALL11_ARAHY	Allergen Ara h 1 clone P17 OS=Arachis hypogaea OX=3818 PE=1 SV=1	1	G453	KAMVIVVVNKgTGNLELVAVR	Carbamylation	34.12	148.28	0	148.28	0	143.97	0	272000	565000000	189000	245000000
P43237|ALL11_ARAHY	Allergen Ara h 1 clone P17 OS=Arachis hypogaea OX=3818 PE=1 SV=1	1	K542	NNHRIFLAGDkDNVIDQIEKQ	Carbamylation	41.84	62.41	9	62.41	9	N/A	N/A	19600000	833000000	0	462000000
P43237|ALL11_ARAHY	Allergen Ara h 1 clone P17 OS=Arachis hypogaea OX=3818 PE=1 SV=1	1	K551	DKDNVIDQIEkQAKDLAFPGS	Carbamylation	52.24	164.73	5	164.73	5	128	1	11000000	844000000	8060000	454000000
P43237|ALL11_ARAHY	Allergen Ara h 1 clone P17 OS=Arachis hypogaea OX=3818 PE=1 SV=1	1	D555	VIDQIEKQAKdLAFPGSGEQV	Carbamylation	49.26	220.78	0	220.78	0	220.78	0	287000	67500000	994000	93700000
tr|E5G076|E5G076_ARAHY	Ara h 1 allergen OS=Arachis hypogaea OX=3818 GN=ara h 1 PE=4 SV=1	5	V332	FNAEFNEIRRvLLEENAGGEQ	Carbamylation	39.13	1000	0	N/A	N/A	1000	0	0	16100000	422000	37700000
tr|E5G076|E5G076_ARAHY	Ara h 1 allergen OS=Arachis hypogaea OX=3818 GN=ara h 1 PE=4 SV=1	5	K383	LTKHAKSVSKkGSEEEGDITN	Carbamylation	52.73	1000	5	1000	5	1000	5	276000	23400000	139000	32300000
tr|E5G076|E5G076_ARAHY	Ara h 1 allergen OS=Arachis hypogaea OX=3818 GN=ara h 1 PE=4 SV=1	5	G384	TKHAKSVSKKgSEEEGDITNP	Carbamylation	29.55	1000	0	N/A	N/A	1000	0	0	33000000	47900	44300000
tr|E5G076|E5G076_ARAHY	Ara h 1 allergen OS=Arachis hypogaea OX=3818 GN=ara h 1 PE=4 SV=1	5	K457	SKAMVIVVINkGTGNLELVAV	Carbamylation	35.53	73.07	1	73.07	1	N/A	N/A	9470000	0	0	0
tr|E5G076|E5G076_ARAHY	Ara h 1 allergen OS=Arachis hypogaea OX=3818 GN=ara h 1 PE=4 SV=1	5	G458	KAMVIVVINKgTGNLELVAVR	Carbamylation	34.12	148.28	0	148.28	0	143.97	0	272000	31000000	189000	51900000
tr|E5G076|E5G076_ARAHY	Ara h 1 allergen OS=Arachis hypogaea OX=3818 GN=ara h 1 PE=4 SV=1	5	D560	VVDQIEKQAKdLAFPGSGEQV	Carbamylation	49.26	220.78	0	220.78	0	220.78	0	287000	67500000	994000	93700000
sp|Q647G9|CONG_ARAHY	Ara h 6 Conglutin OS=Arachis hypogaea OX=3818 PE=1 SV=1	1	D81	RSSDQQQRCCdELNEMENTQR	Carboxylation (DKW)	37.5	1000	1	1000	1	N/A	N/A	3940	834000	0	1290000
P43237|ALL11_ARAHY	Allergen Ara h 1 clone P17 OS=Arachis hypogaea OX=3818 PE=1 SV=1	1	N216	HRIVQIEARPnTLVLPKHADA	Deamidation (NQ)	41.7	90.21	0	90.21	0	N/A	N/A	11300000	290000000	0	48000000
P43237|ALL11_ARAHY	Allergen Ara h 1 clone P17 OS=Arachis hypogaea OX=3818 PE=1 SV=1	1	N270	IPSGFISYILnRHDNQNLRVA	Deamidation (NQ)	41.77	57.7	0	N/A	N/A	57.7	0	0	758000000	74300	621000000
P43237|ALL11_ARAHY	Allergen Ara h 1 clone P17 OS=Arachis hypogaea OX=3818 PE=1 SV=1	1	Q303	EDFFPASSRDqSSYLQGFSRN	Deamidation (NQ)	31.84	105.53	6	105.53	6	N/A	N/A	37700	161000000	0	101000000
P43237|ALL11_ARAHY	Allergen Ara h 1 clone P17 OS=Arachis hypogaea OX=3818 PE=1 SV=1	1	N313	QSSYLQGFSRnTLEAAFNAEF	Deamidation (NQ)	49.64	61.81	0	61.81	0	N/A	N/A	62600000	353000000	0	310000000
P43237|ALL11_ARAHY	Allergen Ara h 1 clone P17 OS=Arachis hypogaea OX=3818 PE=1 SV=1	1	N324	TLEAAFNAEFnEIRRVLLEEN	Deamidation (NQ)	68.94	55.21	17	55.21	17	N/A	N/A	2170000	413000000	0	308000000
P43237|ALL11_ARAHY	Allergen Ara h 1 clone P17 OS=Arachis hypogaea OX=3818 PE=1 SV=1	1	N334	NEIRRVLLEEnAGGEQEERGQ	Deamidation (NQ)	83.29	121.37	35	N/A	N/A	121.37	35	0	16100000	690000	37500000
P43237|ALL11_ARAHY	Allergen Ara h 1 clone P17 OS=Arachis hypogaea OX=3818 PE=1 SV=1	1	N388	KKGSEEEDITnPINLRDGEPD	Deamidation (NQ)	43.63	59.1	16	N/A	N/A	59.1	16	0	139000000	277000	36900000
P43237|ALL11_ARAHY	Allergen Ara h 1 clone P17 OS=Arachis hypogaea OX=3818 PE=1 SV=1	1	N415	RLFEVKPDKKnPQLQDLDMML	Deamidation (NQ)	30.64	69.03	0	N/A	N/A	69.03	0	0	378000000	309000	407000000
P43237|ALL11_ARAHY	Allergen Ara h 1 clone P17 OS=Arachis hypogaea OX=3818 PE=1 SV=1	1	Q417	FEVKPDKKNPqLQDLDMMLTC	Deamidation (NQ)	30.64	71.6	0	N/A	N/A	71.6	0	0	381000000	309000	421000000
P43237|ALL11_ARAHY	Allergen Ara h 1 clone P17 OS=Arachis hypogaea OX=3818 PE=1 SV=1	1	Q419	VKPDKKNPQLqDLDMMLTCVE	Deamidation (NQ)	30.64	53.74	0	N/A	N/A	53.74	0	0	334000000	309000	402000000
P43237|ALL11_ARAHY	Allergen Ara h 1 clone P17 OS=Arachis hypogaea OX=3818 PE=1 SV=1	1	N441	KEGALMLPHFnSKAMVIVVVN	Deamidation (NQ)	73.95	1000	13	51.53	0	1000	13	5030000	352000000	177000	346000000
P43237|ALL11_ARAHY	Allergen Ara h 1 clone P17 OS=Arachis hypogaea OX=3818 PE=1 SV=1	1	Q552	KDNVIDQIEKqAKDLAFPGSG	Deamidation (NQ)	45.41	58.99	1	N/A	N/A	58.99	1	0	58100000	391000	2410000
tr|E5G076|E5G076_ARAHY	Ara h 1 allergen OS=Arachis hypogaea OX=3818 GN=ara h 1 PE=4 SV=1	5	Q306	EDFFPASSRDqSSYLQGFSRN	Deamidation (NQ)	31.84	105.53	6	105.53	6	N/A	N/A	37700	61500000	0	97300000
tr|E5G076|E5G076_ARAHY	Ara h 1 allergen OS=Arachis hypogaea OX=3818 GN=ara h 1 PE=4 SV=1	5	N316	QSSYLQGFSRnTLEAAFNAEF	Deamidation (NQ)	49.64	61.81	0	61.81	0	N/A	N/A	62600000	353000000	0	310000000
tr|E5G076|E5G076_ARAHY	Ara h 1 allergen OS=Arachis hypogaea OX=3818 GN=ara h 1 PE=4 SV=1	5	N327	TLEAAFNAEFnEIRRVLLEEN	Deamidation (NQ)	68.94	55.21	17	55.21	17	N/A	N/A	2170000	413000000	0	308000000
tr|E5G076|E5G076_ARAHY	Ara h 1 allergen OS=Arachis hypogaea OX=3818 GN=ara h 1 PE=4 SV=1	5	N337	NEIRRVLLEEnAGGEQEERGQ	Deamidation (NQ)	83.29	121.37	35	N/A	N/A	121.37	35	0	16100000	690000	37500000
tr|E5G076|E5G076_ARAHY	Ara h 1 allergen OS=Arachis hypogaea OX=3818 GN=ara h 1 PE=4 SV=1	5	N420	RLFEVKPDKKnPQLQDLDMML	Deamidation (NQ)	30.64	69.03	0	N/A	N/A	69.03	0	0	378000000	309000	407000000
tr|E5G076|E5G076_ARAHY	Ara h 1 allergen OS=Arachis hypogaea OX=3818 GN=ara h 1 PE=4 SV=1	5	Q422	FEVKPDKKNPqLQDLDMMLTC	Deamidation (NQ)	30.64	71.6	0	N/A	N/A	71.6	0	0	381000000	309000	421000000
tr|E5G076|E5G076_ARAHY	Ara h 1 allergen OS=Arachis hypogaea OX=3818 GN=ara h 1 PE=4 SV=1	5	Q424	VKPDKKNPQLqDLDMMLTCVE	Deamidation (NQ)	30.64	53.74	0	N/A	N/A	53.74	0	0	334000000	309000	402000000
tr|E5G076|E5G076_ARAHY	Ara h 1 allergen OS=Arachis hypogaea OX=3818 GN=ara h 1 PE=4 SV=1	5	N446	KEGALMLPHFnSKAMVIVVIN	Deamidation (NQ)	73.95	1000	13	51.53	0	1000	13	5030000	352000000	177000	346000000
Q6PSU3|Q6PSU3_ARAHY	Ara h 1 Conarachin (Fragment) OS=Arachis hypogaea OX=3818 PE=4 SV=1	2	Q150	KIRPEGREGEqEWGTPGSEVR	Deamidation (NQ)	32.58	1000	0	N/A	N/A	1000	0	0	107000	971	0
sp|P43237|ALL11_ARAHY	Allergen Ara h 1 clone P17 OS=Arachis hypogaea OX=3818 PE=1 SV=1	2	Q150	KIRPEGREGEqEWGTPGSEVR	Deamidation (NQ)	32.58	1000	0	N/A	N/A	1000	0	0	107000	971	0
T2B9M0|T2B9M0_ARAHY	Fructose-bisphosphate aldolase OS=Arachis hypogaea OX=3818 PE=2 SV=1	14	N115	DKGTVELAGTnGETTTQGLDG	Deamidation (NQ)	135.18	102.86	68	102.86	68	N/A	N/A	161000	1730000	0	0
E9LFE8|E9LFE8_ARAHY	11S arachin (Fragment) OS=Arachis hypogaea OX=3818 PE=2 SV=1	16	Q45	GIDMGIAGKVqGVDDPRGSII	Deamidation (NQ)	34.61	73.94	0	N/A	N/A	73.94	0	0	3270000	34700	1910000
E9LFE8|E9LFE8_ARAHY	11S arachin (Fragment) OS=Arachis hypogaea OX=3818 PE=2 SV=1	16	N73	TLSPAVEESGnGNGLDETLCT	Deamidation (NQ)	59.64	53.58	3	N/A	N/A	53.58	3	0	3240000	35000	1910000
D8KXZ8|D8KXZ8_ARAHY	Enoyl-ACP reductase 1-3 OS=Arachis hypogaea OX=3818 GN=ENR1-3 PE=2 SV=1	32	N129	ILVGTWVPALnIFESSLRRGK	Deamidation (NQ)	41.07	1000	0	1000	0	N/A	N/A	11100	16900	0	0
A1DZF0|A1DZF0_ARAHY	Arachin 6 OS=Arachis hypogaea OX=3818 PE=2 SV=1	3	N57	ESEGGYIETWnPNNQEFECAG	Deamidation (NQ)	39.71	1000	48	N/A	N/A	1000	48	0	42000	26600	1430000
A1DZF0|A1DZF0_ARAHY	Arachin 6 OS=Arachis hypogaea OX=3818 PE=2 SV=1	3	N60	GGYIETWNPNnQEFECAGVAL	Deamidation (NQ)	35.71	1000	0	N/A	N/A	1000	0	0	42000	80800	1380000
A1DZF0|A1DZF0_ARAHY	Arachin 6 OS=Arachis hypogaea OX=3818 PE=2 SV=1	3	Q61	GYIETWNPNNqEFECAGVALS	Deamidation (NQ)	61.01	1000	1	N/A	N/A	1000	1	0	42000	6680	1450000
A1DZF0|A1DZF0_ARAHY	Arachin 6 OS=Arachis hypogaea OX=3818 PE=2 SV=1	3	N496	IDNLPEEVVAnSYGLPREQAR	Deamidation (NQ)	58.95	51.97	8	N/A	N/A	51.97	8	0	0	3980	1030000
Q647H4|Q647H4_ARAHY	Ara h 3 Arachin Ahy-1 OS=Arachis hypogaea OX=3818 PE=2 SV=1	7	N57	ESEGGYIETWnPNNQEFECAG	Deamidation (NQ)	39.71	1000	48	N/A	N/A	1000	48	0	42000	26600	1430000
Q647H4|Q647H4_ARAHY	Ara h 3 Arachin Ahy-1 OS=Arachis hypogaea OX=3818 PE=2 SV=2	7	N60	GGYIETWNPNnQEFECAGVAL	Deamidation (NQ)	35.71	1000	0	N/A	N/A	1000	0	0	42000	80800	1380000
Q647H4|Q647H4_ARAHY	Ara h 3 Arachin Ahy-1 OS=Arachis hypogaea OX=3818 PE=2 SV=3	7	Q61	GYIETWNPNNqEFECAGVALS	Deamidation (NQ)	61.01	1000	1	N/A	N/A	1000	1	0	42000	6680	1450000
Q647H4|Q647H4_ARAHY	Ara h 3 Arachin Ahy-1 OS=Arachis hypogaea OX=3818 PE=2 SV=4	7	N503	IDNLPEEVVAnSYGLPREQAR	Deamidation (NQ)	58.95	51.97	8	N/A	N/A	51.97	8	0	0	3980	1030000
sp|Q647G9|CONG_ARAHY	Ara h 6 Conglutin OS=Arachis hypogaea OX=3818 PE=1 SV=1	1	Q90	CDELNEMENTqRCMCEALQQI	Deamidation (NQ)	97.95	67.95	7	56.36	1	67.95	7	86600	339000	501000	648000
B0YIU5|B0YIU5_ARAHY	Ara h 8 allergen isoform OS=Arachis hypogaea OX=3818 PE=2 SV=1	12	N47	AIQSIEIVEGnGGPGTVKKVT	Deamidation (NQ)	100.68	166.47	16	166.47	16	N/A	N/A	51600	174000	0	0
B4UW89|B4UW89_ARAHY	Heat shock protein 2 OS=Arachis hypogaea OX=3818 PE=2 SV=1	19	N136	NMDEIRAAMEnGVLTITVPKV	Deamidation (NQ)	94.66	1000	29	1000	29	N/A	N/A	33000	27200	0	0
Q6IWG5|Q6IWG5_ARAHY	Ara h 3 Glycinin (Fragment) OS=Arachis hypogaea OX=3818 PE=2 SV=1	7	N381	LSAQHGTIYRnAMFVPHYTLN	Deamidation (NQ)	90.41	53.47	2	53.47	2	N/A	N/A	4360000	20100000	0	20400000
Q6IWG5|Q6IWG5_ARAHY	Glycinin (Fragment) OS=Arachis hypogaea OX=3818 PE=2 SV=1	7	N400	LNAHTIVVALnGRAHVQVVDS	Deamidation (NQ)	171.32	218.31	13	217.32	12	218.31	13	10700000	13900000	10300000	10100000
Q0GM57|Q0GM57_ARAHY	Ara h 3 Iso-Ara h3 OS=Arachis hypogaea OX=3818 PE=2 SV=1	7	N383	LSAQHGTIYRnAMFVPHYTLN	Deamidation (NQ)	90.41	53.47	2	53.47	2	N/A	N/A	4360000	20100000	0	20400000
Q0GM57|Q0GM57_ARAHY	Ara h 3 Iso-Ara h3 OS=Arachis hypogaea OX=3818 PE=2 SV=2	7	N402	LNAHTIVVALnGRAHVQVVDS	Deamidation (NQ)	171.32	218.31	13	217.32	12	218.31	13	10700000	13900000	10300000	10100000
E9LFE8|E9LFE8_ARAHY	11S arachin (Fragment) OS=Arachis hypogaea OX=3818 PE=2 SV=1	8	N162	GRGWIEVVGEnGRKVYEGEVR	Deamidation (NQ)	97.47	1000	47	1000	47	1000	34	760000	1020000	14500	65200
E9LFE8|E9LFE8_ARAHY	11S arachin (Fragment) OS=Arachis hypogaea OX=3818 PE=2 SV=1	8	N230	IRAMPLPVLMnSFRLTAEEAI	Deamidation (NQ)	118.62	1000	1	1000	1	N/A	N/A	202000	19700000	0	5680000
A1E2B1|A1E2B1_ARAHY	11S seed storage globulin B2 OS=Arachis hypogaea OX=3818 PE=2 SV=1	12	N186	PTFRNFLLSGnGNGKEGEESN	Deamidation (NQ)	84.59	96.06	6	96.06	6	N/A	N/A	88400	229000	0	0
A1E2B1|A1E2B1_ARAHY	11S seed storage globulin B2 OS=Arachis hypogaea OX=3818 PE=2 SV=1	12	N188	FRNFLLSGNGnGKEGEESNNN	Deamidation (NQ)	84.59	72.88	6	72.88	6	N/A	N/A	88400	93600	0	0
A1E2B1|A1E2B1_ARAHY	11S seed storage globulin B2 OS=Arachis hypogaea OX=3818 PE=2 SV=1	12	N196	NGNGKEGEESnNNWFIKKKQR	Deamidation (NQ)	63.63	65.92	5	65.92	5	N/A	N/A	86100	175000	0	0
N1NJN8|N1NJN8_ARAHY	Proteasome subunit OS=Arachis hypogaea OX=3818 GN=ARAX_AHF417E07-015 PE=4 SV=1	19	N71	LKNVALYQFRnGIPLTTSAAA	Deamidation (NQ)	47.26	81.93	0	81.93	0	N/A	N/A	43300	0	0	0
tr|E5G076|E5G076_ARAHY	Ara h 1 allergen OS=Arachis hypogaea OX=3818 GN=ara h 1 PE=4 SV=1	5	Q216	FQNLQNHRIVqIEAKPNTLVL	Deamidation followed by a methylation	43.48	129.71	0	129.71	0	129.71	0	16200000	312000000	441000	28800000
P43237|ALL11_ARAHY	Allergen Ara h 1 clone P17 OS=Arachis hypogaea OX=3818 PE=1 SV=1	1	Q234	ADADNILVIQqGQATVTVANG	Dehydration	34.07	76.17	4	76.17	4	N/A	N/A	101000	456000000	0	8680000
P43237|ALL11_ARAHY	Allergen Ara h 1 clone P17 OS=Arachis hypogaea OX=3818 PE=1 SV=1	1	T314	SSYLQGFSRNtLEAAFNAEFN	Dehydration	54.15	1000	0	1000	0	1000	0	13500000	403000000	11100000	300000000
P43237|ALL11_ARAHY	Allergen Ara h 1 clone P17 OS=Arachis hypogaea OX=3818 PE=1 SV=1	1	T454	AMVIVVVNKGtGNLELVAVRK	Dehydration	37.66	1000	2	1000	2	1000	2	767000	564000000	992000	244000000
tr|E5G076|E5G076_ARAHY	Ara h 1 allergen OS=Arachis hypogaea OX=3818 GN=ara h 1 PE=4 SV=1	5	T223	RIVQIEAKPNtLVLPKHADAD	Dehydration	29.51	1000	0	1000	0	N/A	N/A	1390000	327000000	0	33000000
tr|E5G076|E5G076_ARAHY	Ara h 1 allergen OS=Arachis hypogaea OX=3818 GN=ara h 1 PE=4 SV=1	5	Q240	ADADNILVIQqGQATVTVANG	Dehydration	34.07	76.17	4	76.17	4	N/A	N/A	101000	11900000	0	0
tr|E5G076|E5G076_ARAHY	Ara h 1 allergen OS=Arachis hypogaea OX=3818 GN=ara h 1 PE=4 SV=1	5	T317	SSYLQGFSRNtLEAAFNAEFN	Dehydration	54.15	1000	0	1000	0	1000	0	13500000	403000000	11100000	300000000
tr|E5G076|E5G076_ARAHY	Ara h 1 allergen OS=Arachis hypogaea OX=3818 GN=ara h 1 PE=4 SV=1	5	T459	AMVIVVINKGtGNLELVAVRK	Dehydration	37.66	1000	2	1000	2	1000	2	767000	30300000	992000	50900000
A1E2B1|A1E2B1_ARAHY	11S seed storage globulin B2 OS=Arachis hypogaea OX=3818 PE=2 SV=1	12	Y74	LQCIGVTLIRyTIRPKGLLLP	Dehydroalanine (Y)	44.6	69.38	0	69.38	0	N/A	N/A	1270000	0	0	0
P43237|ALL11_ARAHY	Allergen Ara h 1 clone P17 OS=Arachis hypogaea OX=3818 PE=1 SV=1	1	M284	NQNLRVAKISmPVNTPGQFED	Dethiomethyl	62.88	1000	6	1000	6	1000	2	30100000	311000000	6460000	106000000
P43237|ALL11_ARAHY	Allergen Ara h 1 clone P17 OS=Arachis hypogaea OX=3818 PE=1 SV=1	1	M436	TCVEIKEGALmLPHFNSKAMV	Dethiomethyl	37.55	1000	7	1000	7	1000	7	1350000	334000000	2300000	311000000
P43237|ALL11_ARAHY	Allergen Ara h 1 clone P17 OS=Arachis hypogaea OX=3818 PE=1 SV=1	1	M445	LMLPHFNSKAmVIVVVNKGTG	Dethiomethyl	93.99	1000	0	1000	0	N/A	N/A	24300000	393000000	0	166000000
tr|E5G076|E5G076_ARAHY	Ara h 1 allergen OS=Arachis hypogaea OX=3818 GN=ara h 1 PE=4 SV=1	5	M441	TCVEIKEGALmLPHFNSKAMV	Dethiomethyl	37.55	1000	7	1000	7	1000	7	1350000	334000000	2300000	311000000
sp|Q647G9|CONG_ARAHY	Ara h 6 Conglutin OS=Arachis hypogaea OX=3818 PE=1 SV=1	1	M122	QMVQQFKRELmNLPQQCNFRA	Dethiomethyl	68.12	1000	0	N/A	N/A	1000	0	0	10500000	300000	8380000
Q647H1|Q647H1_ARAHY	Conarachin OS=Arachis hypogaea OX=3818 PE=2 SV=1	15	K561	LLVPQNFAVGkQAGNEGFEYV	Diethylation	39.27	121.4	0	121.4	0	121.4	0	2800000	529000	401000	401000
B4UW81|B4UW81_ARAHY	Glutathione S-transferase 2 OS=Arachis hypogaea OX=3818 PE=2 SV=1	26	Y138	EKLLKDHTGRyATGDEIFLAD	Dihydroxy	50.98	104.79	0	104.79	0	N/A	N/A	615000	3720000	0	0
A1DZF0|A1DZF0_ARAHY	Arachin 6 OS=Arachis hypogaea OX=3818 PE=2 SV=1	1	W388	ANELNLLILRwLGLSAEYGNL	Dihydroxy	65.98	62.93	5	N/A	N/A	62.93	5	0	39700000	86000	56900000
Q6T2T4|Q6T2T4_ARAHY	Ara h 3 Storage protein OS=Arachis hypogaea OX=3818 PE=2 SV=1	2	W395	ANELNLLILRwLGLSAEYGNL	Dihydroxy	65.98	62.93	5	N/A	N/A	62.93	5	0	39700000	86000	56900000
Q647H4|Q647H4_ARAHY	Ara h 3 Arachin Ahy-1 OS=Arachis hypogaea OX=3818 PE=2 SV=1	2	W395	ANELNLLILRwLGLSAEYGNL	Dihydroxy	65.98	62.93	5	N/A	N/A	62.93	5	0	39700000	86000	56900000
Q9FZ11|Q9FZ11_ARAHY	Ara h 3 Gly1 OS=Arachis hypogaea OX=3818 GN=Gly1 PE=2 SV=1	5	W388	ANDLNLLILRwLGLSAEYGNL	Dihydroxy	65.98	62.93	5	N/A	N/A	62.93	5	0	39700000	86000	56900000
Q647H3|Q647H3_ARAHY	Ara h 3 Arachin Ahy-2 OS=Arachis hypogaea OX=3818 PE=2 SV=1	4	W396	ANDLNLLILRwLGLSAEYGNL	Dihydroxy	65.98	62.93	5	N/A	N/A	62.93	5	0	39700000	86000	56900000
P43237|ALL11_ARAHY	Allergen Ara h 1 clone P17 OS=Arachis hypogaea OX=3818 PE=1 SV=1	1	R214	QNHRIVQIEArPNTLVLPKHA	Dimethylation(KR)	41.7	71.06	13	71.06	13	N/A	N/A	11300000	290000000	0	47800000
E9LFE8|E9LFE8_ARAHY	11S arachin (Fragment) OS=Arachis hypogaea OX=3818 PE=2 SV=1	16	R126	VLQYVQLGADrGVFYKNAVMA	Dimethylation(KR)	88.08	1000	0	1000	0	1000	0	305000	0	524000	0
E9LFE8|E9LFE8_ARAHY	11S arachin (Fragment) OS=Arachis hypogaea OX=3818 PE=2 SV=1	8	R126	VLQYVQLGADrGVFYKNAVMA	Dimethylation(KR)	134.42	1000	0	1000	0	1000	0	72800000	0	8440000	0
A1E2B1|A1E2B1_ARAHY	11S seed storage globulin B2 OS=Arachis hypogaea OX=3818 PE=2 SV=1	12	S61	GGVAEFWDDKsQQLQCIGVTL	Ethyl amino	57.5	119.64	2	119.64	2	N/A	N/A	133000	12900000	0	554000
P43237|ALL11_ARAHY	Allergen Ara h 1 clone P17 OS=Arachis hypogaea OX=3818 PE=1 SV=1	1	K248	TVTVANGNNRkSFNLDEGHAL	Formylation	51.74	1000	0	N/A	N/A	1000	0	0	464000000	31700	15300000
P43237|ALL11_ARAHY	Allergen Ara h 1 clone P17 OS=Arachis hypogaea OX=3818 PE=1 SV=1	1	R259	SFNLDEGHALrIPSGFISYIL	Formylation	32.72	1000	5	N/A	N/A	1000	5	0	336000000	164000	211000000
P43237|ALL11_ARAHY	Allergen Ara h 1 clone P17 OS=Arachis hypogaea OX=3818 PE=1 SV=1	1	N313	QSSYLQGFSRnTLEAAFNAEF	Formylation	44.98	1000	5	N/A	N/A	1000	5	0	353000000	42200	310000000
P43237|ALL11_ARAHY	Allergen Ara h 1 clone P17 OS=Arachis hypogaea OX=3818 PE=1 SV=1	1	I536	FGINAENNHRiFLAGDKDNVI	Formylation	73.61	98.74	0	N/A	N/A	98.74	0	0	853000000	2440000	454000000
tr|E5G076|E5G076_ARAHY	Ara h 1 allergen OS=Arachis hypogaea OX=3818 GN=ara h 1 PE=4 SV=1	5	N316	QSSYLQGFSRnTLEAAFNAEF	Formylation	44.98	1000	5	N/A	N/A	1000	5	0	353000000	42200	310000000
P43237|ALL11_ARAHY	Allergen Ara h 1 clone P17 OS=Arachis hypogaea OX=3818 PE=1 SV=1	1	P155	GREGEQEWGTpGSEVREETSR	Hydroxylation Pro	65.79	1000	4	1000	3	1000	4	4950000	26400000	9100000	49200000
P43237|ALL11_ARAHY	Allergen Ara h 1 clone P17 OS=Arachis hypogaea OX=3818 PE=1 SV=1	1	P221	IEARPNTLVLpKHADADNILV	Hydroxylation Pro	35.75	74.54	0	74.54	0	N/A	N/A	8490000	292000000	0	48000000
P43237|ALL11_ARAHY	Allergen Ara h 1 clone P17 OS=Arachis hypogaea OX=3818 PE=1 SV=1	1	P261	NLDEGHALRIpSGFISYILNR	Hydroxylation Pro	68.51	1000	14	1000	0	1000	14	15700000	751000000	26400000	596000000
P43237|ALL11_ARAHY	Allergen Ara h 1 clone P17 OS=Arachis hypogaea OX=3818 PE=1 SV=1	1	P559	IEKQAKDLAFpGSGEQVEKLI	Hydroxylation Pro	62.85	1000	2	N/A	N/A	1000	2	0	67800000	802000	94800000
tr|E5G076|E5G076_ARAHY	Ara h 1 allergen OS=Arachis hypogaea OX=3818 GN=ara h 1 PE=4 SV=1	5	P161	GREGEQEWGTpGSHVREETSR	Hydroxylation Pro	68.66	1000	17	N/A	N/A	1000	17	0	2990000	133000	4640000
tr|E5G076|E5G076_ARAHY	Ara h 1 allergen OS=Arachis hypogaea OX=3818 GN=ara h 1 PE=4 SV=1	5	P221	NHRIVQIEAKpNTLVLPKHAD	Hydroxylation Pro	51.38	65.06	14	65.06	14	N/A	N/A	614000	328000000	0	32800000
tr|E5G076|E5G076_ARAHY	Ara h 1 allergen OS=Arachis hypogaea OX=3818 GN=ara h 1 PE=4 SV=1	5	P564	IEKQAKDLAFpGSGEQVEKLI	Hydroxylation Pro	62.85	1000	2	N/A	N/A	1000	2	0	67800000	802000	94800000
P43237|ALL11_ARAHY	Allergen Ara h 1 clone P17 OS=Arachis hypogaea OX=3818 PE=1 SV=1	1	Y267	ALRIPSGFISyILNRHDNQNL	Iodination	71.86	1000	13	1000	13	1000	12	985000	765000000	220000	623000000
Q38711|Q38711_ARAHY	Ara h Agglutinin Galactose-binding lectin (Fragment) OS=Arachis hypogaea OX=3818 GN=lec PE=2 SV=1	5	Y69	NKVNSVGRVLyAMPVRIWSSA	Iodination	38.88	1000	31	1000	31	N/A	N/A	24100	966000	0	516000
A0A089ZXL7|A0A089ZXL7_ARAHY	Peanut agglutinin variant OS=Arachis hypogaea OX=3818 PE=2 SV=1	8	Y71	NKVNSVGRVLyAMPVRIWSSA	Iodination	38.88	1000	31	1000	31	N/A	N/A	24100	966000	0	516000
P43237|ALL11_ARAHY	Allergen Ara h 1 clone P17 OS=Arachis hypogaea OX=3818 PE=1 SV=1	1	K452	SKAMVIVVVNkGTGNLELVAV	Lysine oxidation to aminoadipic semialdehyde	31.98	1000	1	1000	1	N/A	N/A	25800000	528000000	0	205000000
P43237|ALL11_ARAHY	Allergen Ara h 1 clone P17 OS=Arachis hypogaea OX=3818 PE=1 SV=1	1	K551	DKDNVIDQIEkQAKDLAFPGS	Methylation(C-term)	52.24	1000	5	1000	5	1000	1	11000000	844000000	8060000	454000000
P43237|ALL11_ARAHY	Allergen Ara h 1 clone P17 OS=Arachis hypogaea OX=3818 PE=1 SV=1	1	K248	TVTVANGNNRkSFNLDEGHAL	Methylation(KR)	54.16	160.69	5	160.69	5	156.89	5	226000	464000000	308000	15300000
P43237|ALL11_ARAHY	Allergen Ara h 1 clone P17 OS=Arachis hypogaea OX=3818 PE=1 SV=1	1	R342	EENAGGEQEErGQRRRSTRSS	Methylation(KR)	60.94	1000	0	N/A	N/A	1000	0	0	16100000	175000	38000000
P43237|ALL11_ARAHY	Allergen Ara h 1 clone P17 OS=Arachis hypogaea OX=3818 PE=1 SV=1	1	K431	LDMMLTCVEIkEGALMLPHFN	Methylation(KR)	81.66	1000	0	69.38	0	1000	0	11400000	370000000	19200000	395000000
tr|E5G076|E5G076_ARAHY	Ara h 1 allergen OS=Arachis hypogaea OX=3818 GN=ara h 1 PE=4 SV=1	5	R345	EENAGGEQEErGQRRWSTRSS	Methylation(KR)	60.94	1000	0	N/A	N/A	1000	0	0	16100000	175000	38000000
tr|E5G076|E5G076_ARAHY	Ara h 1 allergen OS=Arachis hypogaea OX=3818 GN=ara h 1 PE=4 SV=1	5	K383	LTKHAKSVSKkGSEEEGDITN	Methylation(KR)	52.73	168.06	5	168.06	5	168.06	5	276000	23400000	139000	32300000
tr|E5G076|E5G076_ARAHY	Ara h 1 allergen OS=Arachis hypogaea OX=3818 GN=ara h 1 PE=4 SV=1	5	K436	LDMMLTCVEIkEGALMLPHFN	Methylation(KR)	81.66	1000	0	69.38	0	1000	0	11400000	370000000	19200000	395000000
Q647H3|Q647H3_ARAHY	Arachin Ahy-2 OS=Arachis hypogaea OX=3818 PE=2 SV=1	10	R196	NDNQLDQFPRrFNLAGNHEQE	Methylation(KR)	39.08	67.1	2	67.1	2	N/A	N/A	671000	6160000	0	2350000
A1DZF0|A1DZF0_ARAHY	Arachin 6 OS=Arachis hypogaea OX=3818 PE=2 SV=1	9	R195	NDNQLDQFPRrFNLAGNHEQE	Methylation(KR)	39.08	67.1	2	67.1	2	N/A	N/A	671000	6160000	0	2350000
P43237|ALL11_ARAHY	Allergen Ara h 1 clone P17 OS=Arachis hypogaea OX=3818 PE=1 SV=1	1	S249	VTVANGNNRKsFNLDEGHALR	Methylation(others)	57.4	109.97	5	109.97	5	82.23	5	4500000	329000000	1940000	203000000
P43237|ALL11_ARAHY	Allergen Ara h 1 clone P17 OS=Arachis hypogaea OX=3818 PE=1 SV=1	1	S283	DNQNLRVAKIsMPVNTPGQFE	Methylation(others)	60.85	86.15	0	86.15	0	N/A	N/A	768000	366000000	0	123000000
P43237|ALL11_ARAHY	Allergen Ara h 1 clone P17 OS=Arachis hypogaea OX=3818 PE=1 SV=1	1	H439	EIKEGALMLPhFNSKAMVIVV	Methylation(others)	55.64	65.81	9	53.53	9	65.81	7	25400	359000000	196000	348000000
P43237|ALL11_ARAHY	Allergen Ara h 1 clone P17 OS=Arachis hypogaea OX=3818 PE=1 SV=1	1	T454	AMVIVVVNKGtGNLELVAVRK	Methylation(others)	34.12	68.06	0	68.06	0	68.06	0	272000	564000000	189000	244000000
P43237|ALL11_ARAHY	Allergen Ara h 1 clone P17 OS=Arachis hypogaea OX=3818 PE=1 SV=1	1	D555	VIDQIEKQAKdLAFPGSGEQV	Methylation(others)	49.26	132.52	0	132.52	0	132.52	0	287000	67500000	994000	93700000
tr|E5G076|E5G076_ARAHY	Ara h 1 allergen OS=Arachis hypogaea OX=3818 GN=ara h 1 PE=4 SV=1	5	H444	EIKEGALMLPhFNSKAMVIVV	Methylation(others)	55.64	65.81	9	53.53	9	65.81	7	25400	359000000	196000	348000000
tr|E5G076|E5G076_ARAHY	Ara h 1 allergen OS=Arachis hypogaea OX=3818 GN=ara h 1 PE=4 SV=1	5	T459	AMVIVVINKGtGNLELVAVRK	Methylation(others)	34.12	68.06	0	68.06	0	68.06	0	272000	30300000	189000	50900000
tr|E5G076|E5G076_ARAHY	Ara h 1 allergen OS=Arachis hypogaea OX=3818 GN=ara h 1 PE=4 SV=1	5	D560	VVDQIEKQAKdLAFPGSGEQV	Methylation(others)	49.26	132.52	0	132.52	0	132.52	0	287000	67500000	994000	93700000
sp|Q647G9|CONG_ARAHY	Ara h 6 Conglutin OS=Arachis hypogaea OX=3818 PE=1 SV=1	1	M93	LNEMENTQRCmCEALQQIMEN	Naphthalene-2 3-dicarboxaldehyde	34.52	1000	5	1000	5	N/A	N/A	1810	3460000	0	3680000
E9LFE9|E9LFE9_ARAHY	11S arachin OS=Arachis hypogaea OX=3818 PE=2 SV=1	19	V216	GREKSISGRNvFSGISLNLLA	N-Succinimidyl-2-morpholine acetate	57.5	1000	5	1000	0	1000	5	18600000	5650000	544000	1320000
P43237|ALL11_ARAHY	Allergen Ara h 1 clone P17 OS=Arachis hypogaea OX=3818 PE=1 SV=1	1	T238	NILVIQQGQAtVTVANGNNRK	O-Diethylphosphorylation	32.62	72.04	4	72.04	4	N/A	N/A	2820	462000000	0	8680000
tr|E5G076|E5G076_ARAHY	Ara h 1 allergen OS=Arachis hypogaea OX=3818 GN=ara h 1 PE=4 SV=1	5	T244	NILVIQQGQAtVTVANGNNRR	O-Diethylphosphorylation	32.62	72.04	4	72.04	4	N/A	N/A	2820	11900000	0	0
P43237|ALL11_ARAHY	Allergen Ara h 1 clone P17 OS=Arachis hypogaea OX=3818 PE=1 SV=1	1	W152	RPEGREGEQEwGTPGSEVREE	Oxidation (HW)	37.01	1000	50	N/A	N/A	1000	50	0	31200000	4190000	53800000
P43237|ALL11_ARAHY	Allergen Ara h 1 clone P17 OS=Arachis hypogaea OX=3818 PE=1 SV=1	1	H206	RSKQFQNLQNhRIVQIEARPN	Oxidation (HW)	36.17	1000	0	N/A	N/A	1000	0	0	3510000	1300	5360000
P43237|ALL11_ARAHY	Allergen Ara h 1 clone P17 OS=Arachis hypogaea OX=3818 PE=1 SV=1	1	H223	ARPNTLVLPKhADADNILVIQ	Oxidation (HW)	40.04	1000	5	1000	5	N/A	N/A	248000	460000000	0	8680000
P43237|ALL11_ARAHY	Allergen Ara h 1 clone P17 OS=Arachis hypogaea OX=3818 PE=1 SV=1	1	H256	NRKSFNLDEGhALRIPSGFIS	Oxidation (HW)	73.46	1000	6	N/A	N/A	1000	6	0	336000000	1170000	211000000
P43237|ALL11_ARAHY	Allergen Ara h 1 clone P17 OS=Arachis hypogaea OX=3818 PE=1 SV=1	1	W476	QQQRGRREQEwEEEEEDEEEE	Oxidation (HW)	83.49	1000	21	N/A	N/A	1000	21	0	10600000	1090000	7430000
tr|E5G076|E5G076_ARAHY	Ara h 1 allergen OS=Arachis hypogaea OX=3818 GN=ara h 1 PE=4 SV=1	5	W158	RPEGREGEQEwGTPGSHVREE	Oxidation (HW)	46.11	72.73	16	N/A	N/A	72.73	16	0	2950000	22500	4750000
tr|E5G076|E5G076_ARAHY	Ara h 1 allergen OS=Arachis hypogaea OX=3818 GN=ara h 1 PE=4 SV=1	5	H369	EGVIVEVSKEhVEELTKHAKS	Oxidation (HW)	34.58	1000	12	N/A	N/A	1000	12	0	114000	7350	230000
tr|E5G076|E5G076_ARAHY	Ara h 1 allergen OS=Arachis hypogaea OX=3818 GN=ara h 1 PE=4 SV=1	5	W481	QQQRGRREQEwEEEEEDEEEE	Oxidation (HW)	83.49	1000	21	N/A	N/A	1000	21	0	10600000	1090000	7430000
A1DZF0|A1DZF0_ARAHY	Arachin 6 OS=Arachis hypogaea OX=3818 PE=2 SV=1	3	W388	ANELNLLILRwLGLSAEYGNL	Oxidation (HW)	37.59	1000	0	N/A	N/A	1000	0	0	18600	3890	2230000
Q647H3|Q647H3_ARAHY	Aara h 3 rachin Ahy-2 OS=Arachis hypogaea OX=3818 PE=2 SV=1	5	W396	ANDLNLLILRwLGLSAEYGNL	Oxidation (HW)	37.59	1000	0	N/A	N/A	1000	0	0	18600	3890	2230000
Q647H4|Q647H4_ARAHY	Ara h 3 Arachin Ahy-1 OS=Arachis hypogaea OX=3818 PE=2 SV=1	7	W395	ANELNLLILRwLGLSAEYGNL	Oxidation (HW)	37.59	1000	0	N/A	N/A	1000	0	0	18600	3890	2230000
P43237|ALL11_ARAHY	Allergen Ara h 1 clone P17 OS=Arachis hypogaea OX=3818 PE=1 SV=1	1	M284	NQNLRVAKISmPVNTPGQFED	Oxidation (M)	106.79	1000	26	1000	26	1000	21	25200000	311000000	22300000	94000000
P43237|ALL11_ARAHY	Allergen Ara h 1 clone P17 OS=Arachis hypogaea OX=3818 PE=1 SV=1	1	M423	KKNPQLQDLDmMLTCVEIKEG	Oxidation (M)	64.09	1000	15	1000	15	1000	15	640000	349000000	4460000	324000000
P43237|ALL11_ARAHY	Allergen Ara h 1 clone P17 OS=Arachis hypogaea OX=3818 PE=1 SV=1	1	M424	KNPQLQDLDMmLTCVEIKEGA	Oxidation (M)	64.09	1000	36	1000	15	1000	36	1440000	349000000	4460000	385000000
P43237|ALL11_ARAHY	Allergen Ara h 1 clone P17 OS=Arachis hypogaea OX=3818 PE=1 SV=1	1	M436	TCVEIKEGALmLPHFNSKAMV	Oxidation (M)	75.21	1000	21	1000	19	1000	21	9610000	336000000	33100000	288000000
P43237|ALL11_ARAHY	Allergen Ara h 1 clone P17 OS=Arachis hypogaea OX=3818 PE=1 SV=1	1	M445	LMLPHFNSKAmVIVVVNKGTG	Oxidation (M)	96.51	1000	2	1000	2	1000	0	136000000	393000000	39100000	166000000
tr|E5G076|E5G076_ARAHY	Ara h 1 allergen OS=Arachis hypogaea OX=3818 GN=ara h 1 PE=4 SV=1	5	M428	KKNPQLQDLDmMLTCVEIKEG	Oxidation (M)	64.09	1000	15	1000	15	1000	15	640000	349000000	4460000	324000000
tr|E5G076|E5G076_ARAHY	Ara h 1 allergen OS=Arachis hypogaea OX=3818 GN=ara h 1 PE=4 SV=1	5	M429	KNPQLQDLDMmLTCVEIKEGA	Oxidation (M)	64.09	1000	36	1000	15	1000	36	1440000	349000000	4460000	385000000
tr|E5G076|E5G076_ARAHY	Ara h 1 allergen OS=Arachis hypogaea OX=3818 GN=ara h 1 PE=4 SV=1	5	M441	TCVEIKEGALmLPHFNSKAMV	Oxidation (M)	75.21	1000	21	1000	19	1000	21	9610000	336000000	33100000	288000000
sp|P43238|ALL12_ARAHY	Allergen Ara h 1 clone P41B OS=Arachis hypogaea OX=3818 PE=1 SV=1	1	M290	NQNLRVAKISmPVNTPGQFED	Oxidation (M)	156.38	1000	18	1000	2	1000	18	5750000	17100000	3420000	3780000
sp|P43238|ALL12_ARAHY	Allergen Ara h 1 clone P41B OS=Arachis hypogaea OX=3818 PE=1 SV=1	1	M431	KKNPQLQDLDmMLTCVEIKEG	Oxidation (M)	38.81	1000	0	N/A	N/A	1000	0	0	10600000	60900	907000
sp|P43238|ALL12_ARAHY	Allergen Ara h 1 clone P41B OS=Arachis hypogaea OX=3818 PE=1 SV=1	1	M432	KNPQLQDLDMmLTCVEIKEGA	Oxidation (M)	38.81	1000	1	N/A	N/A	1000	1	0	12800000	60900	1170000
sp|P43238|ALL12_ARAHY	Allergen Ara h 1 clone P41B OS=Arachis hypogaea OX=3818 PE=1 SV=1	1	M444	TCVEIKEGALmLPHFNSKAMV	Oxidation (M)	38.81	1000	0	N/A	N/A	1000	0	0	9890000	60900	1260000
sp|P43238|ALL12_ARAHY	Allergen Ara h 1 clone P41B OS=Arachis hypogaea OX=3818 PE=1 SV=1	1	M453	LMLPHFNSKAmVIVVVNKGTG	Oxidation (M)	91.96	1000	0	1000	0	1000	0	2000000	14300000	554000	5530000
Q6PSU3|Q6PSU3_ARAHY	Ara h 1 Conarachin (Fragment) OS=Arachis hypogaea OX=3818 PE=4 SV=1	2	M284	NQNLRVAKISmPVNTPGQFED	Oxidation (M)	156.38	1000	18	1000	2	1000	18	5750000	17100000	3420000	3780000
Q6PSU3|Q6PSU3_ARAHY	Ara h 1 Conarachin (Fragment) OS=Arachis hypogaea OX=3818 PE=4 SV=2	2	M423	KKNPQLQDLDmMLTCVEIKEG	Oxidation (M)	38.81	1000	0	N/A	N/A	1000	0	0	10600000	60900	907000
Q6PSU3|Q6PSU3_ARAHY	Ara h 1 Conarachin (Fragment) OS=Arachis hypogaea OX=3818 PE=4 SV=3	2	M424	KNPQLQDLDMmLTCVEIKEGA	Oxidation (M)	38.81	1000	1	N/A	N/A	1000	1	0	12800000	60900	1170000
Q6PSU3|Q6PSU3_ARAHY	Ara h 1 Conarachin (Fragment) OS=Arachis hypogaea OX=3818 PE=4 SV=4	2	M436	TCVEIKEGALmLPHFNSKAMV	Oxidation (M)	38.81	1000	0	N/A	N/A	1000	0	0	9890000	60900	1260000
Q6PSU3|Q6PSU3_ARAHY	Ara h 1 Conarachin (Fragment) OS=Arachis hypogaea OX=3818 PE=4 SV=5	2	M445	LMLPHFNSKAmVIVVVNKGTG	Oxidation (M)	91.96	1000	0	1000	0	1000	0	2000000	14300000	554000	5530000
sp|P43237|ALL11_ARAHY	Allergen Ara h 1 clone P17 OS=Arachis hypogaea OX=3818 PE=1 SV=1	2	M284	NQNLRVAKISmPVNTPGQFED	Oxidation (M)	156.38	1000	18	1000	2	1000	18	5750000	17100000	3420000	3780000
sp|P43237|ALL11_ARAHY	Allergen Ara h 1 clone P17 OS=Arachis hypogaea OX=3818 PE=1 SV=1	2	M423	KKNPQLQDLDmMLTCVEIKEG	Oxidation (M)	38.81	1000	0	N/A	N/A	1000	0	0	10600000	60900	907000
sp|P43237|ALL11_ARAHY	Allergen Ara h 1 clone P17 OS=Arachis hypogaea OX=3818 PE=1 SV=1	2	M424	KNPQLQDLDMmLTCVEIKEGA	Oxidation (M)	38.81	1000	1	N/A	N/A	1000	1	0	12800000	60900	1170000
sp|P43237|ALL11_ARAHY	Allergen Ara h 1 clone P17 OS=Arachis hypogaea OX=3818 PE=1 SV=1	2	M436	TCVEIKEGALmLPHFNSKAMV	Oxidation (M)	38.81	1000	0	N/A	N/A	1000	0	0	9890000	60900	1260000
sp|P43237|ALL11_ARAHY	Allergen Ara h 1 clone P17 OS=Arachis hypogaea OX=3818 PE=1 SV=1	2	M445	LMLPHFNSKAmVIVVVNKGTG	Oxidation (M)	91.96	1000	0	1000	0	1000	0	2000000	14300000	554000	5530000
Q38711|Q38711_ARAHY	Ara h Agglutinin Galactose-binding lectin (Fragment) OS=Arachis hypogaea OX=3818 GN=lec PE=2 SV=1	5	M71	VNSVGRVLYAmPVRIWSSATG	Oxidation (M)	51.91	1000	10	1000	4	1000	10	19700	970000	13600	503000
Q38711|Q38711_ARAHY	Ara h Agglutinin Galactose-binding lectin (Fragment) OS=Arachis hypogaea OX=3818 GN=lec PE=2 SV=2	5	M94	ASFLTSFSFEmKDIKDYDPAD	Oxidation (M)	136.3	1000	0	1000	0	1000	0	14300000	15600000	832000	1360000
A0A089ZXL7|A0A089ZXL7_ARAHY	Ara h 3 Peanut agglutinin variant OS=Arachis hypogaea OX=3818 PE=2 SV=1	8	M73	VNSVGRVLYAmPVRIWSSATG	Oxidation (M)	51.91	1000	10	1000	4	1000	10	19700	970000	13600	503000
A0A089ZXL7|A0A089ZXL7_ARAHY	Ara h 3 Peanut agglutinin variant OS=Arachis hypogaea OX=3818 PE=2 SV=2	8	M96	ASFLTSFSFEmKDIKDYDPAD	Oxidation (M)	136.3	1000	0	1000	0	1000	0	14300000	15600000	832000	1360000
Q647H3|Q647H3_ARAHY	Ara h 3 Arachin Ahy-2 OS=Arachis hypogaea OX=3818 PE=2 SV=1	10	M167	IAVPTGVALWmYNDHDTDVVA	Oxidation (M)	34.78	1000	0	1000	0	N/A	N/A	127000	0	0	0
A1E2B0|A1E2B0_ARAHY	11S seed storage globulin B1 OS=Arachis hypogaea OX=3818 PE=2 SV=1	6	M187	PQEEKGEEGNmFSGLELKTVA	Oxidation (M)	101.84	1000	3	1000	2	1000	3	4000000	32600000	478000	1300000
A1E2B0|A1E2B0_ARAHY	11S seed storage globulin B1 OS=Arachis hypogaea OX=3818 PE=2 SV=1	6	M204	KTVAESLDIDmGIAGKVQGVD	Oxidation (M)	100.33	1000	15	1000	7	1000	15	53000	5330000	5640	81400
A1E2B0|A1E2B0_ARAHY	11S seed storage globulin B1 OS=Arachis hypogaea OX=3818 PE=2 SV=1	6	M220	VQGVDDPRGSmIIVEDELETL	Oxidation (M)	50.31	1000	0	1000	0	N/A	N/A	88200	982000	0	0
A0A0A6ZDP1|A0A0A6ZDP1_ARAHY	Glyceraldehyde-3-phosphate dehydrogenase C2 OS=Arachis hypogaea OX=3818 PE=2 SV=1	15	M27	TTGLGIVEGLmTTVHSITATQ	Oxidation (M)	79.84	1000	8	1000	8	N/A	N/A	16300000	49100000	0	0
A0A0A6ZDP1|A0A0A6ZDP1_ARAHY	Glyceraldehyde-3-phosphate dehydrogenase C2 OS=Arachis hypogaea OX=3818 PE=2 SV=1	15	M83	LPSLNGKLTGmAFRVPTVDVS	Oxidation (M)	92.56	1000	0	1000	0	N/A	N/A	1380000	3470000	0	0
A0A0F6VX63|A0A0F6VX63_ARAHY	Annexin OS=Arachis hypogaea OX=3818 PE=2 SV=1	20	M107	KRWTSSNQVLmEIACTRSSDQ	Oxidation (M)	75.53	1000	1	1000	1	N/A	N/A	72100	247000	0	0
A0A0F6VX63|A0A0F6VX63_ARAHY	Annexin OS=Arachis hypogaea OX=3818 PE=2 SV=1	20	M306	AKDTTGDYEKmLLAILGHDDV	Oxidation (M)	114.41	1000	0	1000	0	N/A	N/A	1750000	4480000	0	0
E9LFE8|E9LFE8_ARAHY	11S arachin (Fragment) OS=Arachis hypogaea OX=3818 PE=2 SV=1	16	M21	PQEEKGEEGNmFSGLELKTVA	Oxidation (M)	101.84	1000	3	1000	2	1000	3	4000000	32600000	478000	1300000
E9LFE8|E9LFE8_ARAHY	11S arachin (Fragment) OS=Arachis hypogaea OX=3818 PE=2 SV=1	16	M38	KTVAESLGIDmGIAGKVQGVD	Oxidation (M)	105.53	1000	9	1000	9	1000	4	35300	4840000	38200	193000
A0A0A6ZDT0|A0A0A6ZDT0_ARAHY	Glyceraldehyde-3-phosphate dehydrogenase C2 OS=Arachis hypogaea OX=3818 PE=4 SV=1	21	M83	LPSLNGKLTGmAFRVPTVDVS	Oxidation (M)	92.56	1000	0	1000	0	N/A	N/A	1380000	3470000	0	0
sp|Q647G9|CONG_ARAHY	Ara h 6 Conglutin OS=Arachis hypogaea OX=3818 PE=1 SV=1	22	M56	PCEQHIMQRImGEQEQYDSYD	Oxidation (M)	103.56	1000	1	N/A	N/A	1000	1	0	27500	19400	46100
sp|Q647G9|CONG_ARAHY	Ara h 6 Conglutin OS=Arachis hypogaea OX=3818 PE=1 SV=2	22	M122	QMVQQFKRELmNLPQQCNFRA	Oxidation (M)	71.88	1000	9	N/A	N/A	1000	9	0	0	7150	58500
sp|Q6PSU2|CONG7_ARAHY	Ara h 2 Conglutin-7 OS=Arachis hypogaea OX=3818 PE=1 SV=2	24	M117	LNEFENNQRCmCEALQQIMEN	Oxidation (M)	73.35	1000	2	62.5	2	1000	1	31500	1970000	107000	267000
sp|Q6PSU2|CONG7_ARAHY	Ara h 2 Conglutin-7 OS=Arachis hypogaea OX=3818 PE=1 SV=3	24	M125	RCMCEALQQImENQSDRLQGR	Oxidation (M)	51.17	1000	1	N/A	N/A	1000	1	0	2000000	68900	365000
Q06H31|Q06H31_ARAHY	Translationally controlled tumor-like protein OS=Arachis hypogaea OX=3818 PE=2 SV=1	43	M1	**********mLVYQDLLTGD	Oxidation (M)	70.06	1000	0	1000	0	N/A	N/A	210000	509000	0	0
sp|Q647G9|CONG_ARAHY	Ara h 6 Conglutin OS=Arachis hypogaea OX=3818 PE=1 SV=1	1	M52	VNLKPCEQHImQRIMGEQEQY	Oxidation (M)	50.66	1000	0	1000	0	1000	0	35300	1670000	21100	2420000
sp|Q647G9|CONG_ARAHY	Ara h 6 Conglutin OS=Arachis hypogaea OX=3818 PE=1 SV=2	1	M56	PCEQHIMQRImGEQEQYDSYD	Oxidation (M)	145.71	1000	28	1000	20	1000	28	2890000	15900000	2960000	14300000
sp|Q647G9|CONG_ARAHY	Ara h 6 Conglutin OS=Arachis hypogaea OX=3818 PE=1 SV=3	1	M93	LNEMENTQRCmCEALQQIMEN	Oxidation (M)	94.14	1000	0	131.33	0	1000	0	475000	3460000	584000	3680000
sp|Q647G9|CONG_ARAHY	Ara h 6 Conglutin OS=Arachis hypogaea OX=3818 PE=1 SV=4	1	M101	RCMCEALQQImENQCDRLQDR	Oxidation (M)	48.86	1000	0	99.61	0	1000	0	30000	4050000	36800	4220000
sp|Q647G9|CONG_ARAHY	Ara h 6 Conglutin OS=Arachis hypogaea OX=3818 PE=1 SV=5	1	M113	NQCDRLQDRQmVQQFKRELMN	Oxidation (M)	34.46	1000	0	1000	0	N/A	N/A	1490	242000	0	380000
sp|Q647G9|CONG_ARAHY	Ara h 6 Conglutin OS=Arachis hypogaea OX=3818 PE=1 SV=6	1	M122	QMVQQFKRELmNLPQQCNFRA	Oxidation (M)	115.57	1000	5	1000	4	1000	5	1290000	10500000	967000	8380000
sp|P43238|ALL12_ARAHY	Allergen Ara h 1 clone P41B OS=Arachis hypogaea OX=3818 PE=1 SV=1	10	M290	NQNLRVAKISmPVNTPGQFED	Oxidation (M)	82.08	1000	16	N/A	N/A	1000	16	0	0	21900	175000
sp|P43237|ALL11_ARAHY	Allergen Ara h 1 clone P17 OS=Arachis hypogaea OX=3818 PE=1 SV=1	11	M284	NQNLRVAKISmPVNTPGQFED	Oxidation (M)	82.08	1000	16	N/A	N/A	1000	16	0	0	21900	175000
Q6PSU3|Q6PSU3_ARAHY	Ara h 1 Conarachin (Fragment) OS=Arachis hypogaea OX=3818 PE=4 SV=1	11	M284	NQNLRVAKISmPVNTPGQFED	Oxidation (M)	82.08	1000	16	N/A	N/A	1000	16	0	0	21900	175000
Q6IWG5|Q6IWG5_ARAHY	Ara h 3 Glycinin (Fragment) OS=Arachis hypogaea OX=3818 PE=2 SV=1	7	M383	AQHGTIYRNAmFVPHYTLNAH	Oxidation (M)	127.62	1000	23	1000	15	1000	23	3210000	22100000	3420000	17000000
Q6IWG5|Q6IWG5_ARAHY	Ara h 3 Glycinin (Fragment) OS=Arachis hypogaea OX=3818 PE=2 SV=2	7	M506	FFVPPFDHQSmREVA******	Oxidation (M)	67.78	1000	1	1000	0	1000	1	256000	1220000	810000	3340000
Q0GM57|Q0GM57_ARAHY	Iso-Ara h3 OS=Arachis hypogaea OX=3818 PE=2 SV=1	7	M385	AQHGTIYRNAmFVPHYTLNAH	Oxidation (M)	127.62	1000	23	1000	15	1000	23	3210000	22100000	3420000	17000000
Q0GM57|Q0GM57_ARAHY	Iso-Ara h3 OS=Arachis hypogaea OX=3818 PE=2 SV=1	7	M508	FFVPPFDHQSmREVA******	Oxidation (M)	67.78	1000	1	1000	0	1000	1	256000	1220000	810000	3340000
E9LFE8|E9LFE8_ARAHY	11S arachin (Fragment) OS=Arachis hypogaea OX=3818 PE=2 SV=1	8	M135	DRGVFYKNAVmAPHYNLNCHA	Oxidation (M)	132.56	1000	39	1000	39	1000	4	684000	5000000	92900	352000
E9LFE8|E9LFE8_ARAHY	11S arachin (Fragment) OS=Arachis hypogaea OX=3818 PE=2 SV=1	8	M209	WIAVKTSDNPmISPLAGKLSL	Oxidation (M)	92.23	1000	6	1000	6	1000	6	125000	2860000	8690	661000
E9LFE8|E9LFE8_ARAHY	11S arachin (Fragment) OS=Arachis hypogaea OX=3818 PE=2 SV=1	8	M223	LAGKLSLIRAmPLPVLMNSFR	Oxidation (M)	56.79	71.26	2	N/A	N/A	71.26	2	0	19900000	512000	5170000
E9LFE8|E9LFE8_ARAHY	11S arachin (Fragment) OS=Arachis hypogaea OX=3818 PE=2 SV=1	8	M229	LIRAMPLPVLmNSFRLTAEEA	Oxidation (M)	107.13	151.86	1	151.86	1	146.62	1	2540000	17400000	403000	5280000
sp|Q647H2|AHY3_ARAHY	Ara h 3 Arachin Ahy-3 OS=Arachis hypogaea OX=3818 PE=1 SV=1	10	M440	ISNLAGKNSYmWNLPEDVVAN	Oxidation (M)	115.73	1000	0	N/A	N/A	1000	0	0	868000	59100	1250000
A1E2B1|A1E2B1_ARAHY	11S seed storage globulin B2 OS=Arachis hypogaea OX=3818 PE=2 SV=1	12	M102	IHYILQGKGVmEIVVTGCRAM	Oxidation (M)	90.95	1000	0	1000	0	N/A	N/A	5550	938000	0	138000
sp|Q6PSU2|CONG7_ARAHY	Ara h 2 Conglutin-7 OS=Arachis hypogaea OX=3818 PE=1 SV=2	11	M117	LNEFENNQRCmCEALQQIMEN	Oxidation (M)	75.43	1000	9	1000	0	1000	9	1070000	5690000	420000	3800000
sp|Q6PSU2|CONG7_ARAHY	Ara h 2 Conglutin-7 OS=Arachis hypogaea OX=3818 PE=1 SV=3	11	M125	RCMCEALQQImENQSDRLQGR	Oxidation (M)	87.22	1000	7	1000	7	1000	2	396000	6360000	604000	3620000
P43237|ALL11_ARAHY	Allergen Ara h 1 clone P17 OS=Arachis hypogaea OX=3818 PE=1 SV=1	1	N251	VANGNNRKSFnLDEGHALRIP	Oxidation or Hydroxylation	54.09	55.91	2	N/A	N/A	55.91	2	0	334000000	702000	210000000
A1E2B1|A1E2B1_ARAHY	11S seed storage globulin B2 OS=Arachis hypogaea OX=3818 PE=2 SV=1	12	T75	QCIGVTLIRYtIRPKGLLLPF	Phosphorylation (STY)	44.6	71.86	0	71.86	0	N/A	N/A	1270000	120000	0	51300
P43237|ALL11_ARAHY	Allergen Ara h 1 clone P17 OS=Arachis hypogaea OX=3818 PE=1 SV=1	1	C427	QLQDLDMMLTcVEIKEGALML	Propionamide	54.06	1000	6	N/A	N/A	1000	6	0	18000000	263000	24200000
tr|E5G076|E5G076_ARAHY	Ara h 1 allergen OS=Arachis hypogaea OX=3818 GN=ara h 1 PE=4 SV=1	5	C432	QLQDLDMMLTcVEIKEGALML	Propionamide	54.06	1000	6	N/A	N/A	1000	6	0	18000000	263000	24200000
Q647H3|Q647H3_ARAHY	Ara h 3 Arachin Ahy-2 OS=Arachis hypogaea OX=3818 PE=2 SV=1	10	C108	RGYFGLIFPGcPSTYEEPAQQ	Propionamide	71.34	1000	4	N/A	N/A	1000	4	0	0	23300	0
A1DZF0|A1DZF0_ARAHY	Ara h 3 Arachin 6 OS=Arachis hypogaea OX=3818 PE=2 SV=1	3	C108	RGYFGLIFPGcPSTYEEPAQQ	Propionamide	87.66	1000	6	N/A	N/A	1000	6	0	0	118000	0
A1DZF0|A1DZF0_ARAHY	Ara h 3 Arachin 6 OS=Arachis hypogaea OX=3818 PE=2 SV=2	3	C351	GSGNGIEETIcTATVKKNIGR	Propionamide	53.99	1000	71	N/A	N/A	1000	71	0	0	5280	0
Q9FZ11|Q9FZ11_ARAHY	Ara h 3 Gly1 OS=Arachis hypogaea OX=3818 GN=Gly1 PE=2 SV=1	2	C109	RGYFGLIFPGcPSTYEEPAQQ	Propionamide	87.66	1000	6	N/A	N/A	1000	6	0	0	118000	0
Q647H3|Q647H3_ARAHY	Ara h 3 Arachin Ahy-2 OS=Arachis hypogaea OX=3818 PE=2 SV=1	5	C108	RGYFGLIFPGcPSTYEEPAQQ	Propionamide	87.66	1000	6	N/A	N/A	1000	6	0	0	118000	0
Q647H4|Q647H4_ARAHY	Ara h 3 Arachin Ahy-1 OS=Arachis hypogaea OX=3818 PE=2 SV=1	7	C108	RGYFGLIFPGcPSTYEEPAQQ	Propionamide	87.66	1000	6	N/A	N/A	1000	6	0	0	118000	0
sp|Q647G9|CONG_ARAHY	Ara h 6 Conglutin OS=Arachis hypogaea OX=3818 PE=1 SV=1	1	C47	RQVDRVNLKPcEQHIMQRIMG	Propionamide	54.64	1000	0	1000	0	1000	0	22300	0	20400	0
sp|Q647G9|CONG_ARAHY	Ara h 6 Conglutin OS=Arachis hypogaea OX=3818 PE=1 SV=2	1	C92	ELNEMENTQRcMCEALQQIME	Propionamide	88.44	54.01	5	54.01	5	N/A	N/A	374000	0	0	0
sp|Q647G9|CONG_ARAHY	Ara h 6 Conglutin OS=Arachis hypogaea OX=3818 PE=1 SV=3	1	C128	KRELMNLPQQcNFRAPQRCDL	Propionamide	120.4	1000	4	1000	4	1000	3	376000	0	216000	0
sp|Q647G9|CONG_ARAHY	Ara h 6 Conglutin OS=Arachis hypogaea OX=3818 PE=1 SV=4	1	C136	QQCNFRAPQRcDLDVSGGRC*	Propionamide	88.25	156.51	5	156.51	2	156.51	5	7030	0	13900	0
A1DZF0|A1DZF0_ARAHY	Ara h 3 Arachin 6 OS=Arachis hypogaea OX=3818 PE=2 SV=1	1	C351	GSGNGIEETIcTATVKKNIGR	Propionamide	39.45	1000	10	N/A	N/A	1000	10	0	0	7380	0
Q6T2T4|Q6T2T4_ARAHY	Ara h 3 Storage protein OS=Arachis hypogaea OX=3818 PE=2 SV=1	2	C358	GSGNGIEETIcTASFKKNIGR	Propionamide	41.74	1000	40	1000	0	1000	40	20600	0	15000	0
Q647H4|Q647H4_ARAHY	Ara h 3 Arachin Ahy-1 OS=Arachis hypogaea OX=3818 PE=2 SV=1	2	C358	GSGNGIEETIcTASFKKNIGR	Propionamide	41.74	1000	40	1000	0	1000	40	20600	0	15000	0
sp|Q647H2|AHY3_ARAHY	Ara h 3 Arachin Ahy-3 OS=Arachis hypogaea OX=3818 PE=1 SV=1	10	C305	DFNNGIEETIcTATVKMNIGK	Propionamide	39.45	1000	10	N/A	N/A	1000	10	0	0	7380	0
P43237|ALL11_ARAHY	Allergen Ara h 1 clone P17 OS=Arachis hypogaea OX=3818 PE=1 SV=1	1	E147	QPRKIRPEGReGEQEWGTPGS	Pyro-glu from E	43.07	1000	5	1000	0	1000	5	90600	31100000	172000	58100000
P43237|ALL11_ARAHY	Allergen Ara h 1 clone P17 OS=Arachis hypogaea OX=3818 PE=1 SV=1	1	E432	DMMLTCVEIKeGALMLPHFNS	Pyro-glu from E	30.01	1000	0	N/A	N/A	1000	0	0	359000000	108000	348000000
tr|E5G076|E5G076_ARAHY	Ara h 1 allergen OS=Arachis hypogaea OX=3818 GN=ara h 1 PE=4 SV=1	5	E153	QPRKIRPEGReGEQEWGTPGS	Pyro-glu from E	57.84	1000	0	1000	0	1000	0	58300	2930000	362000	4410000
tr|E5G076|E5G076_ARAHY	Ara h 1 allergen OS=Arachis hypogaea OX=3818 GN=ara h 1 PE=4 SV=1	5	E437	DMMLTCVEIKeGALMLPHFNS	Pyro-glu from E	30.01	1000	0	N/A	N/A	1000	0	0	359000000	108000	348000000
sp|Q647G9|CONG_ARAHY	Conglutin OS=Arachis hypogaea OX=3818 PE=1 SV=1	1	E120	DRQMVQQFKReLMNLPQQCNF	Pyro-glu from E	37.51	1000	2	N/A	N/A	1000	2	0	11700000	7600	9640000
P43237|ALL11_ARAHY	Allergen Ara h 1 clone P17 OS=Arachis hypogaea OX=3818 PE=1 SV=1	1	Q199	VLQRFDQRSKqFQNLQNHRIV	Pyro-glu from Q	59.85	1000	1	1000	0	1000	1	3420000	91800	5100000	265000
P43237|ALL11_ARAHY	Allergen Ara h 1 clone P17 OS=Arachis hypogaea OX=3818 PE=1 SV=1	1	Q552	KDNVIDQIEKqAKDLAFPGSG	Pyro-glu from Q	61.69	1000	0	N/A	N/A	1000	0	0	58100000	105000	2410000
tr|E5G076|E5G076_ARAHY	Ara h 1 allergen OS=Arachis hypogaea OX=3818 GN=ara h 1 PE=4 SV=1	5	Q205	VLQRFDQRSRqFQNLQNHRIV	Pyro-glu from Q	59.85	1000	1	1000	0	1000	1	3420000	78200	5100000	201000
tr|E5G076|E5G076_ARAHY	Ara h 1 allergen OS=Arachis hypogaea OX=3818 GN=ara h 1 PE=4 SV=1	5	Q557	KDNVVDQIEKqAKDLAFPGSG	Pyro-glu from Q	61.69	1000	0	N/A	N/A	1000	0	0	1340000	105000	287000
A1DZF0|A1DZF0_ARAHY	Ara h 3 Arachin 6 OS=Arachis hypogaea OX=3818 PE=2 SV=1	3	Q25	VLGASSISFRqQPEENACQFQ	Pyro-glu from Q	84.16	1000	0	N/A	N/A	1000	0	0	0	7280	37500
Q9FZ11|Q9FZ11_ARAHY	Ara h 3 Gly1 OS=Arachis hypogaea OX=3818 GN=Gly1 PE=2 SV=1	2	Q26	VLGASSISFRqQPEENACQFQ	Pyro-glu from Q	84.16	1000	0	N/A	N/A	1000	0	0	0	7280	37500
Q647H4|Q647H4_ARAHY	Ara h 3Arachin Ahy-1 OS=Arachis hypogaea OX=3818 PE=2 SV=1	7	Q25	VLGASSISFRqQPEENACQFQ	Pyro-glu from Q	84.16	1000	0	N/A	N/A	1000	0	0	0	7280	37500
sp|Q647G9|CONG_ARAHY	Ara h 6 Conglutin OS=Arachis hypogaea OX=3818 PE=1 SV=1	1	Q38	RQGDSSSCERqVDRVNLKPCE	Pyro-glu from Q	88.55	1000	0	1000	0	1000	0	307000	27600	854000	418000
sp|Q647G9|CONG_ARAHY	Ara h 6 Conglutin OS=Arachis hypogaea OX=3818 PE=1 SV=2	1	Q112	ENQCDRLQDRqMVQQFKRELM	Pyro-glu from Q	85.64	1000	5	1000	5	1000	2	205000	38500	352000	28000
A1DZF0|A1DZF0_ARAHY	Ara h 3 Arachin 6 OS=Arachis hypogaea OX=3818 PE=2 SV=1	1	Q507	SYGLPREQARqLKNNNPFKFF	Pyro-glu from Q	56.19	1000	0	1000	0	1000	0	12400	12500	10600	605000
Q6IWG5|Q6IWG5_ARAHY	Ara h 3 Glycinin (Fragment) OS=Arachis hypogaea OX=3818 PE=2 SV=1	7	Q487	SYRLPREQARqLKNNNPFKFF	Pyro-glu from Q	56.19	1000	0	1000	0	1000	0	12400	12500	10600	0
Q0GM57|Q0GM57_ARAHY	Ara h 3 Iso-Ara h3 OS=Arachis hypogaea OX=3818 PE=2 SV=1	7	Q489	SYRLPREQARqLKNNNPFKFF	Pyro-glu from Q	56.19	1000	0	1000	0	1000	0	12400	12500	10600	0
Q6T2T4|Q6T2T4_ARAHY	Ara h 3 Storage protein OS=Arachis hypogaea OX=3818 PE=2 SV=1	2	Q514	SYGLPREQARqLKNNNPFKFF	Pyro-glu from Q	56.19	1000	0	1000	0	1000	0	12400	12500	10600	0
Q647H4|Q647H4_ARAHY	Ara h 3 Arachin Ahy-1 OS=Arachis hypogaea OX=3818 PE=2 SV=1	2	Q514	SYGLPREQARqLKNNNPFKFF	Pyro-glu from Q	56.19	1000	0	1000	0	1000	0	12400	12500	10600	0
Q9FZ11|Q9FZ11_ARAHY	Ara h 3 Gly1 OS=Arachis hypogaea OX=3818 GN=Gly1 PE=2 SV=1	5	Q507	SYGLPREQARqLKNNNPFKFF	Pyro-glu from Q	56.19	1000	0	1000	0	1000	0	12400	12500	10600	202000
Q647H3|Q647H3_ARAHY	Ara h 3 Arachin Ahy-2 OS=Arachis hypogaea OX=3818 PE=2 SV=1	4	Q515	SYGLPREQARqLKNNNPFKFF	Pyro-glu from Q	56.19	1000	0	1000	0	1000	0	12400	12500	10600	572000
P43237|ALL11_ARAHY	Allergen Ara h 1 clone P17 OS=Arachis hypogaea OX=3818 PE=1 SV=1	1	E563	AKDLAFPGSGeQVEKLIKNQR	Replacement of 2 protons by iron	35.32	62.26	1	62.26	1	N/A	N/A	336000	67500000	0	95300000
tr|E5G076|E5G076_ARAHY	Ara h 1 allergen OS=Arachis hypogaea OX=3818 GN=ara h 1 PE=4 SV=1	5	E568	AKDLAFPGSGeQVEKLIKNQR	Replacement of 2 protons by iron	35.32	62.26	1	62.26	1	N/A	N/A	336000	67500000	0	95300000
A1DZF0|A1DZF0_ARAHY	Ara h 3 Arachin 6 OS=Arachis hypogaea OX=3818 PE=2 SV=1	1	E380	PQAGSLKTANeLNLLILRWLG	Replacement of 2 protons by iron	55.02	154.97	2	N/A	N/A	154.97	2	0	27700000	233000	30100000
A1DZF0|A1DZF0_ARAHY	Ara h 3 Arachin 6 OS=Arachis hypogaea OX=3818 PE=2 SV=2	1	E394	LILRWLGLSAeYGNLYRNALF	Replacement of 2 protons by iron	55.17	156.84	7	156.84	3	156.84	7	185000	39600000	604000	56400000
Q6T2T4|Q6T2T4_ARAHY	Ara h 3 Storage protein OS=Arachis hypogaea OX=3818 PE=2 SV=1	2	E387	PQAGSLKTANeLNLLILRWLG	Replacement of 2 protons by iron	55.02	154.97	2	N/A	N/A	154.97	2	0	27700000	233000	30100000
Q6T2T4|Q6T2T4_ARAHY	Ara h 3 Storage protein OS=Arachis hypogaea OX=3818 PE=2 SV=2	2	E401	LILRWLGLSAeYGNLYRNALF	Replacement of 2 protons by iron	55.17	156.84	7	156.84	3	156.84	7	185000	39600000	604000	56400000
Q647H4|Q647H4_ARAHY	Ara h 3 Arachin Ahy-1 OS=Arachis hypogaea OX=3818 PE=2 SV=1	2	E401	LILRWLGLSAeYGNLYRNALF	Replacement of 2 protons by iron	55.17	156.84	7	156.84	3	156.84	7	185000	39600000	604000	56400000
Q9FZ11|Q9FZ11_ARAHY	Ara h 3 Gly1 OS=Arachis hypogaea OX=3818 GN=Gly1 PE=2 SV=1	5	D380	PQAGSLKTANdLNLLILRWLG	Replacement of 2 protons by iron	41.64	128.79	1	128.79	0	55.73	1	149000	15600000	87700	12900000
Q9FZ11|Q9FZ11_ARAHY	Ara h 3 Gly1 OS=Arachis hypogaea OX=3818 GN=Gly1 PE=2 SV=2	5	E394	LILRWLGLSAeYGNLYRNALF	Replacement of 2 protons by iron	55.17	156.84	7	156.84	3	156.84	7	185000	39600000	604000	56400000
Q647H3|Q647H3_ARAHY	Arachin Ahy-2 OS=Arachis hypogaea OX=3818 PE=2 SV=1	4	D388	PQAGSLKTANdLNLLILRWLG	Replacement of 2 protons by iron	41.64	128.79	1	128.79	0	55.73	1	149000	15600000	87700	12900000
Q647H3|Q647H3_ARAHY	Arachin Ahy-2 OS=Arachis hypogaea OX=3818 PE=2 SV=1	4	E402	LILRWLGLSAeYGNLYRNALF	Replacement of 2 protons by iron	55.17	156.84	7	156.84	3	156.84	7	185000	39600000	604000	56400000
sp|Q647G9|CONG_ARAHY	Ara h 6 Conglutin OS=Arachis hypogaea OX=3818 PE=1 SV=1	1	D81	RSSDQQQRCCdELNEMENTQR	Sodium adduct	35.31	68.52	0	51.95	0	68.52	0	3180	834000	7530	1290000
sp|Q647G9|CONG_ARAHY	Conglutin OS=Arachis hypogaea OX=3818 PE=1 SV=1	1	E82	SSDQQQRCCDeLNEMENTQRC	Sodium adduct	35.31	69.29	1	65.81	0	69.29	1	3180	847000	7530	1330000
sp|Q647G9|CONG_ARAHY	Conglutin OS=Arachis hypogaea OX=3818 PE=1 SV=1	1	E120	DRQMVQQFKReLMNLPQQCNF	Sodium adduct	48	57.71	0	57.71	0	N/A	N/A	77200	11700000	0	9640000
P43237|ALL11_ARAHY	Allergen Ara h 1 clone P17 OS=Arachis hypogaea OX=3818 PE=1 SV=1	1	M445	LMLPHFNSKAmVIVVVNKGTG	Sulphone	39.59	1000	0	1000	0	N/A	N/A	172000	393000000	0	166000000
													1014904680	36587613600	421494922	23071314000
													37602518280		23492808922
